# Supplementary material for: Metabolic reprogramming of cancer cells by JMJD6-mediated pre-mRNA splicing associated with therapeutic response to splicing inhibitor
Source: eLife journal article supplement (doi:10.7554/elife.90993), 2023-11-01

Figure 2B

<https://hgserver1.amc.nl/cgi-bin/r2/main.cgi>

Dataset: [GSE62564](#)

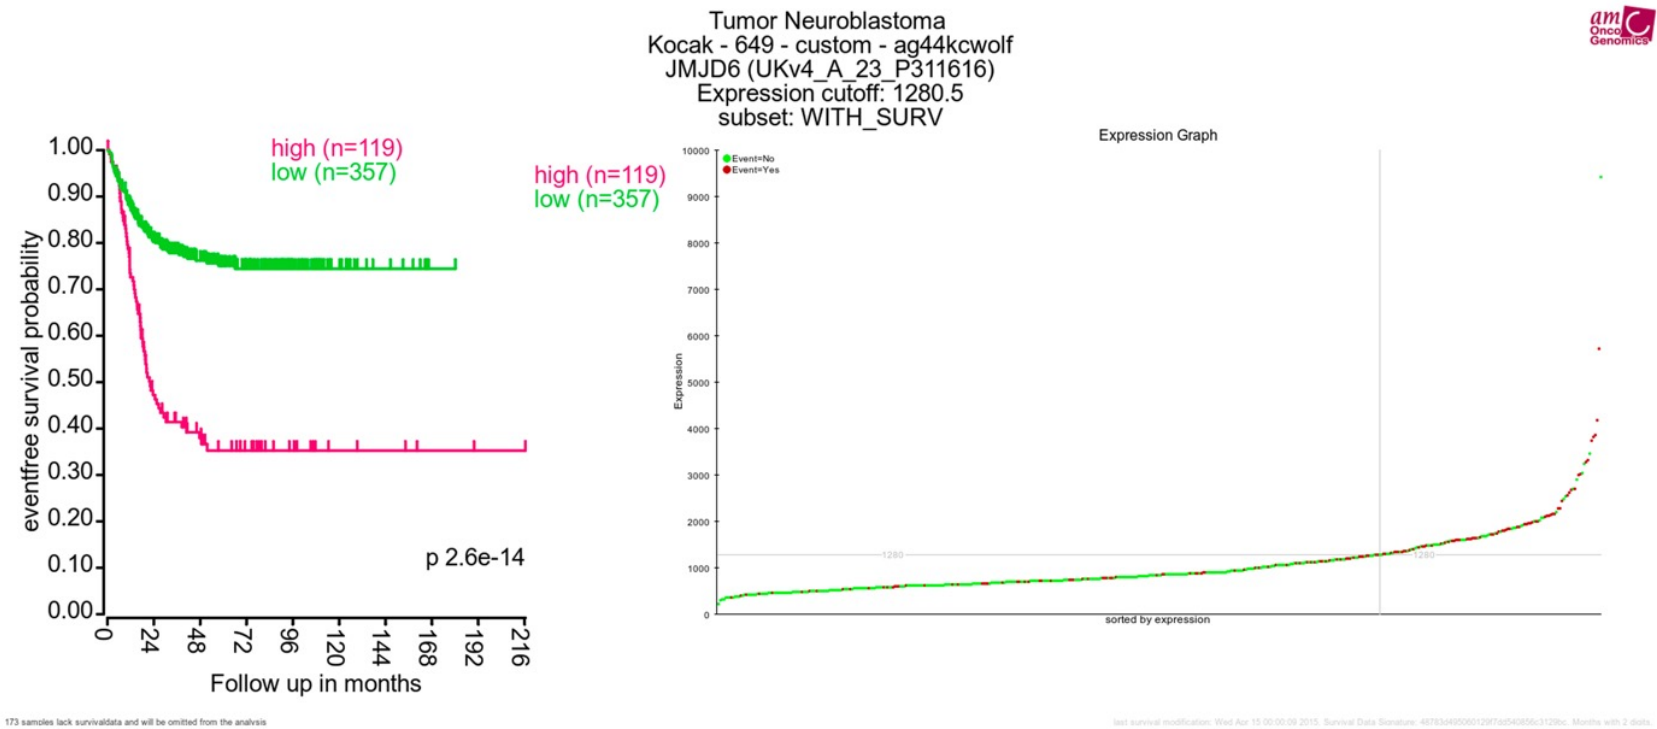

## Figure 2C- SKNAS

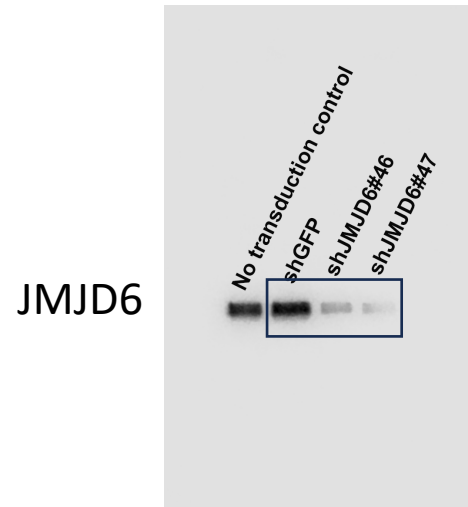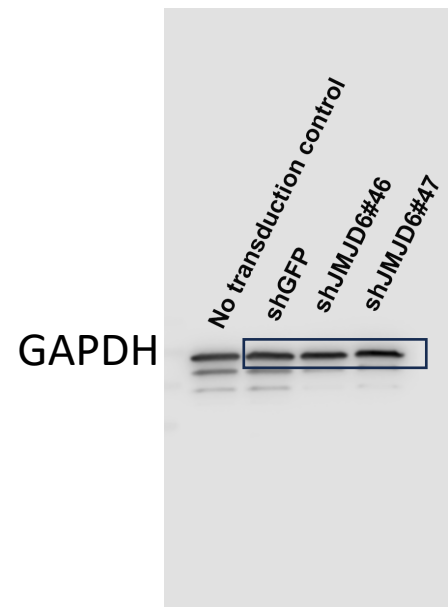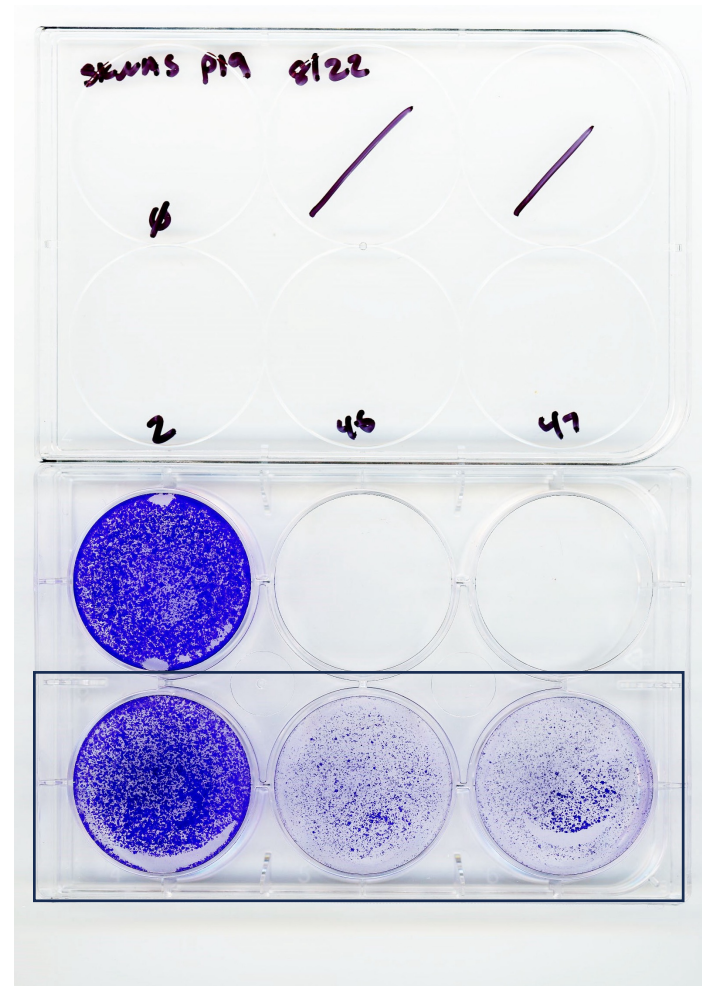

Ø = non transduction control  
2 = shGFP  
46 = shJMJD6#46  
47 = shJMJD6#47

# Figure 2C- BE2C

JMJD6

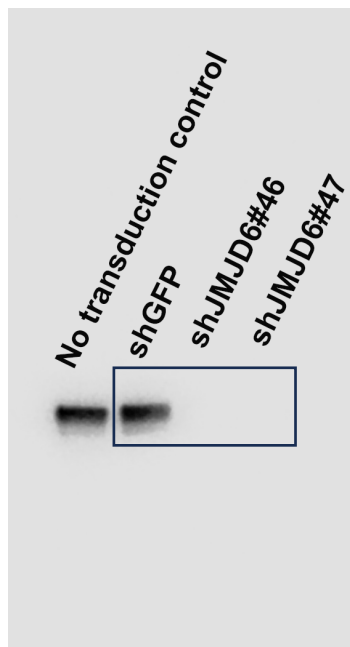

GAPDH

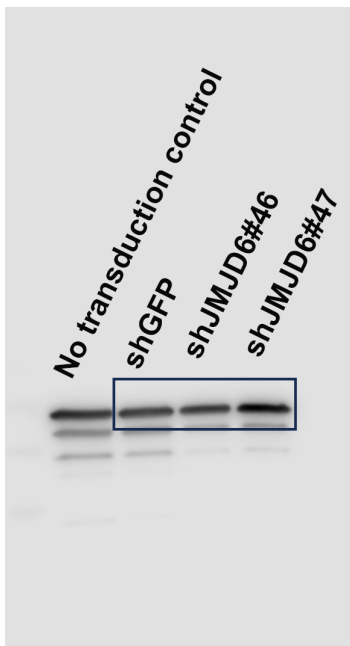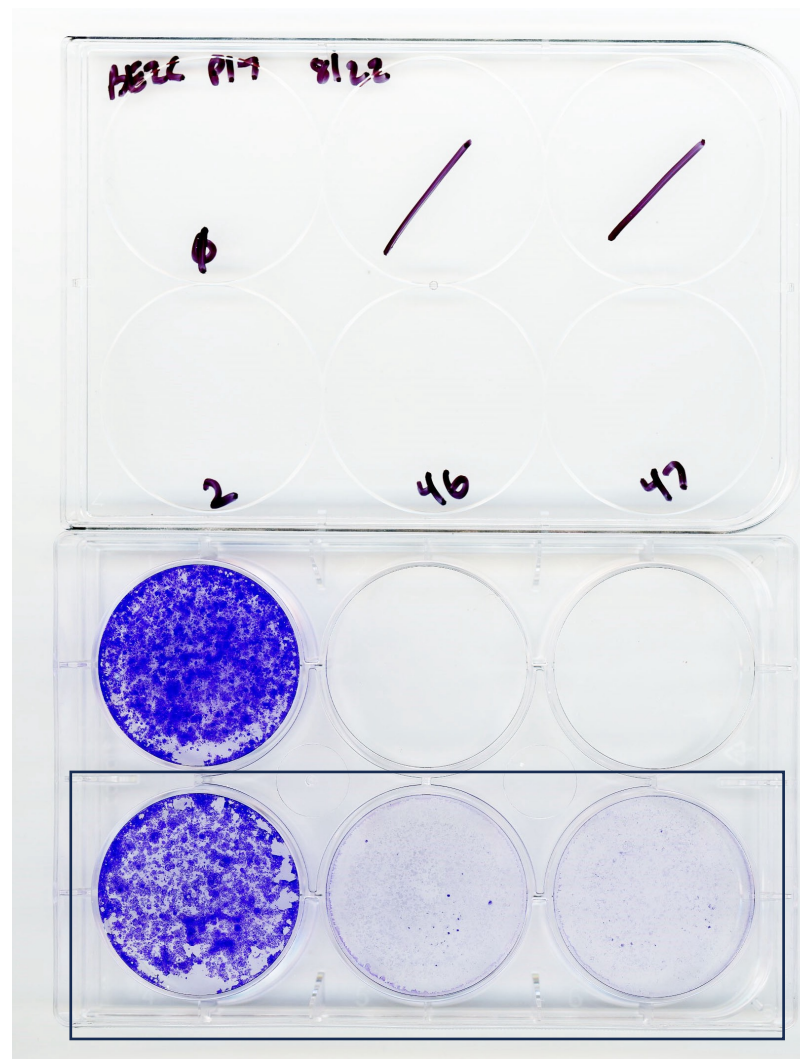

Ø = non transduction control

2 = shGFP

46 = shJMJD6#46

47 = shJMJD6#47

# Figure 2C- KELLY

JMJD6

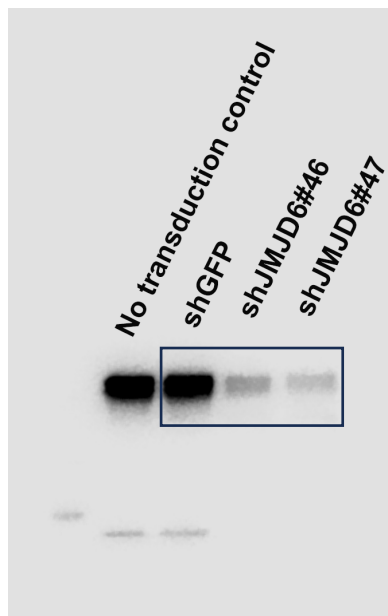

GAPDH

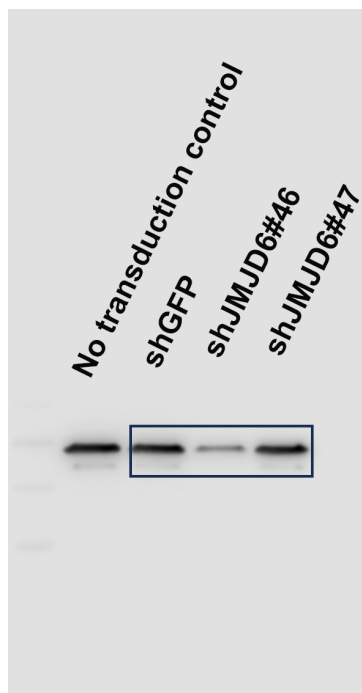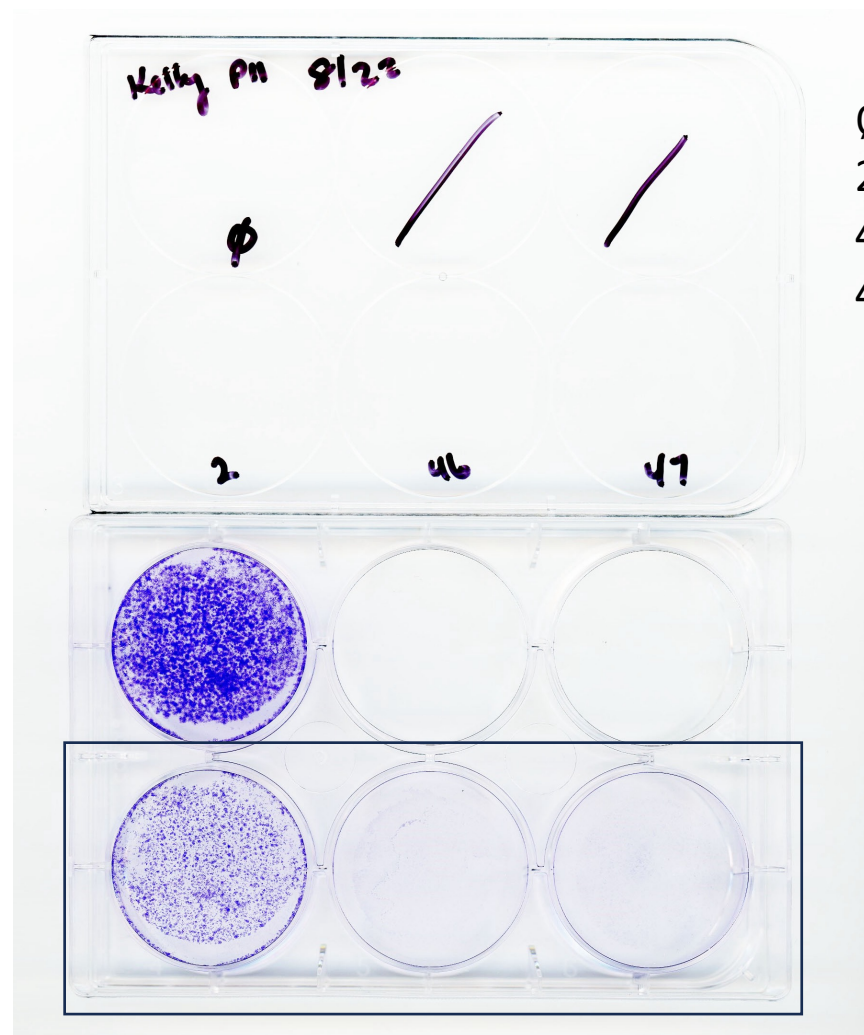

Ø = non transduction control

2 = shGFP

46 = shJMJD6#46

47 = shJMJD6#47

# Figure 2C- SIMA

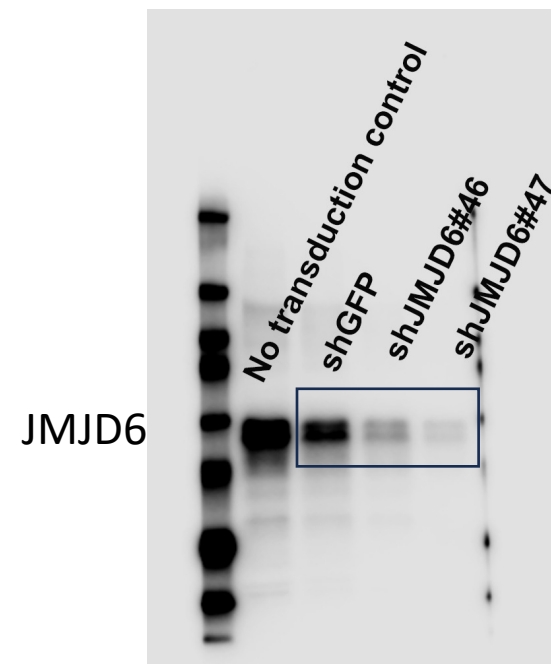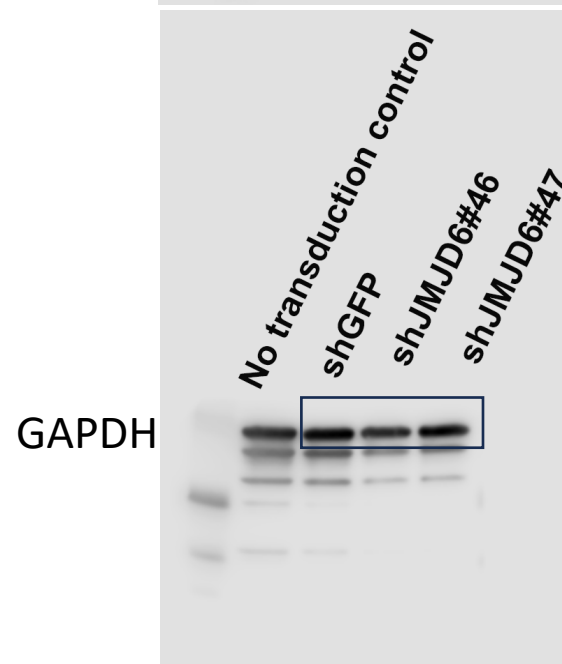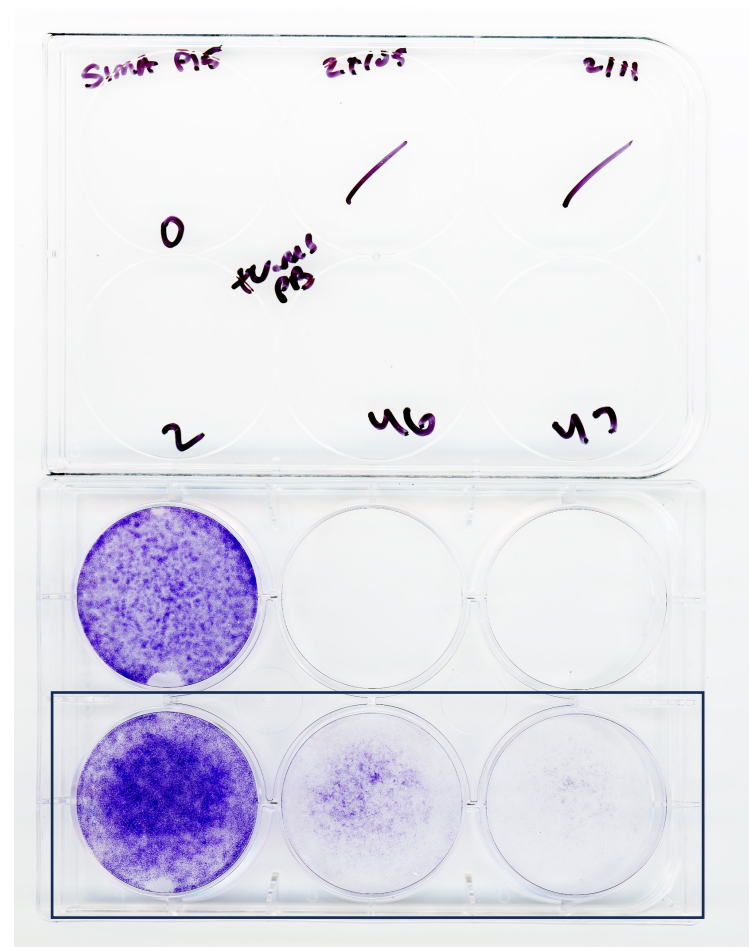

$\emptyset$  = non transduction control  
 2 = shGFP  
 46 = shJMJD6#46  
 47 = shJMJD6#47



# Figure 2C- IMR32 and CHLA20

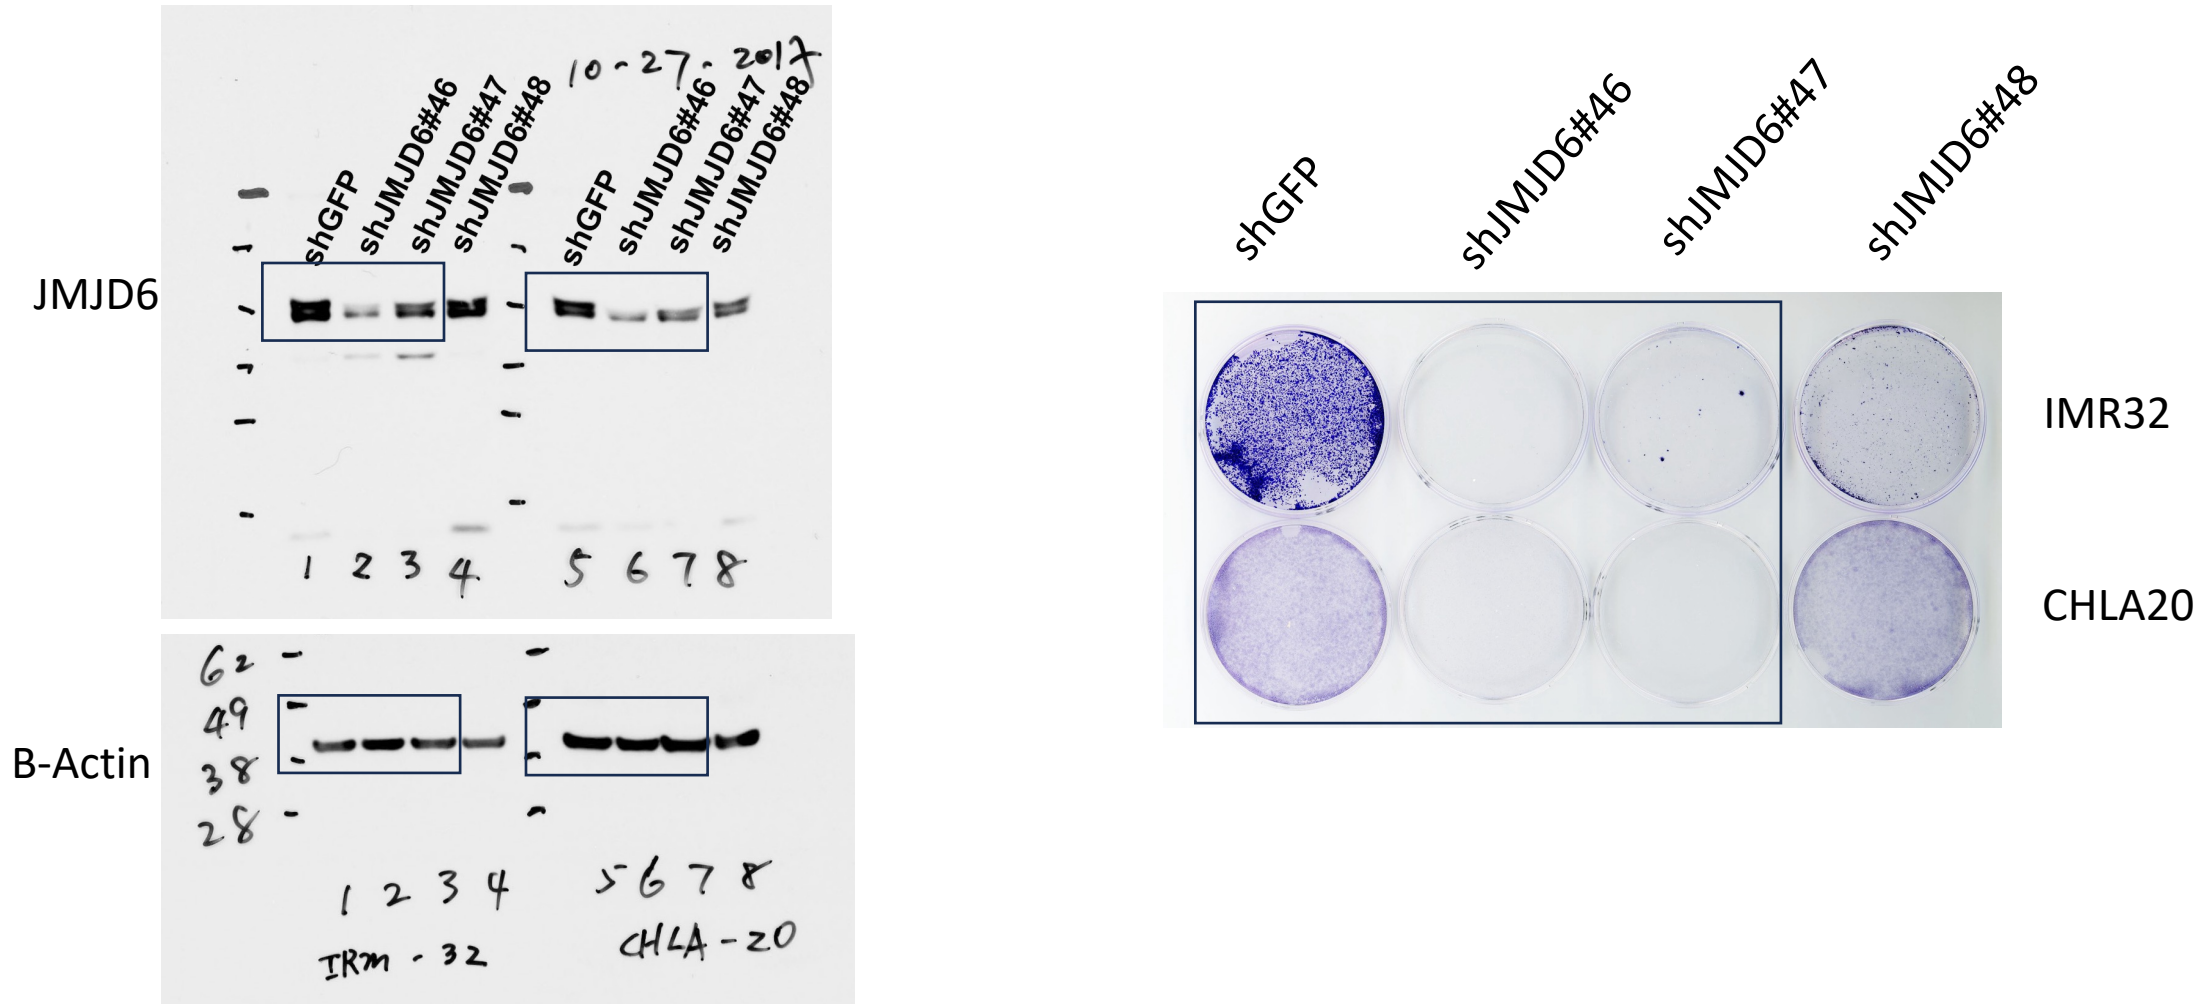

# Figure 2F

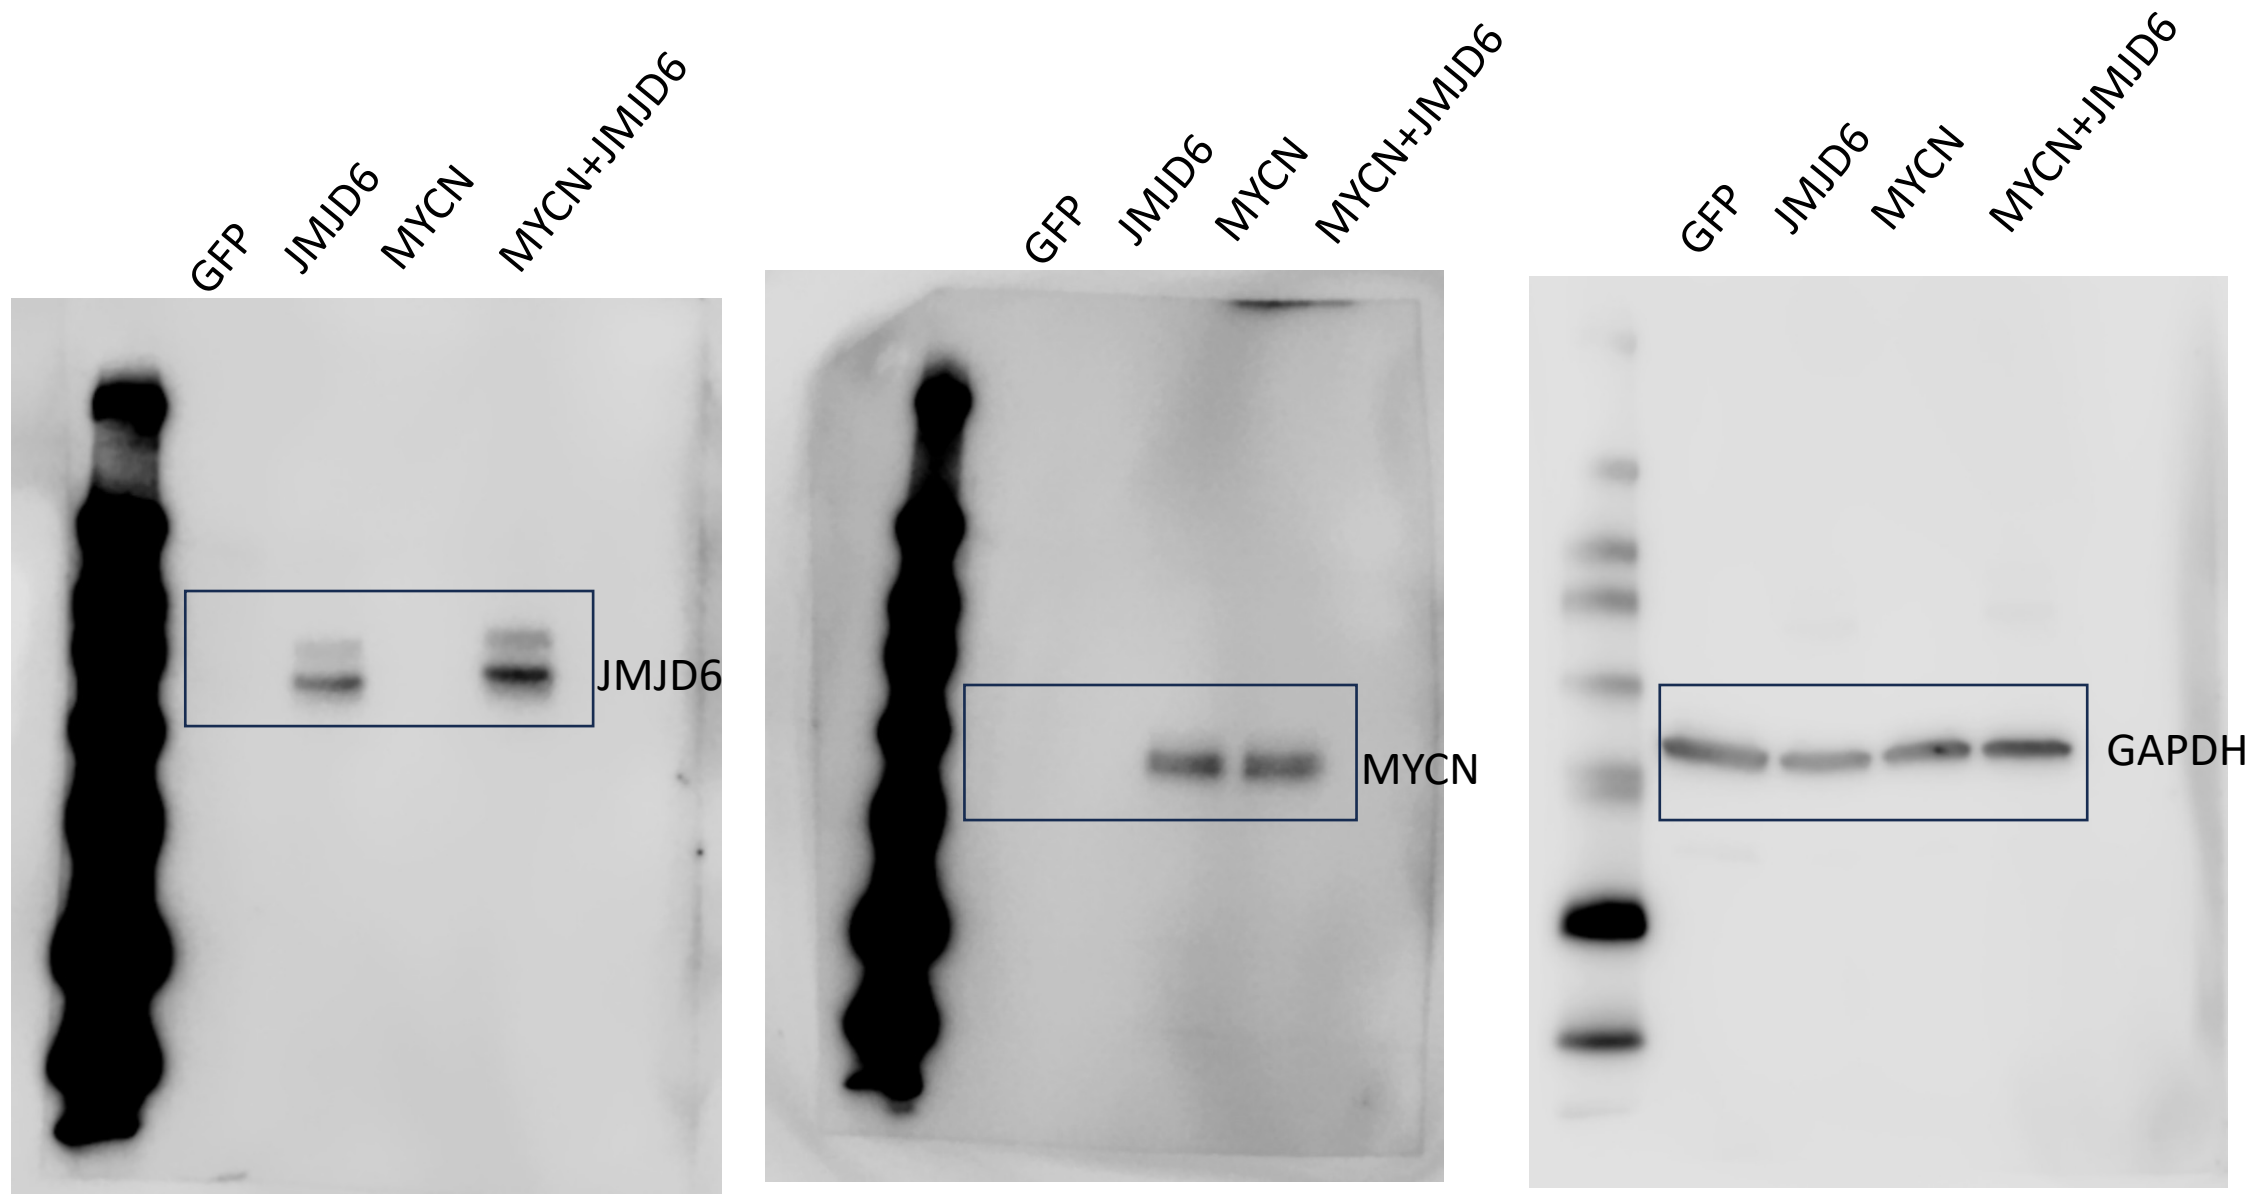

Supplement: data1 [file elife-90993-data1-v1.zip]
