# Supplementary material for: Metabolic reprogramming of cancer cells by JMJD6-mediated pre-mRNA splicing associated with therapeutic response to splicing inhibitor
Source: eLife journal article supplement (doi:10.7554/elife.90993), 2023-11-01

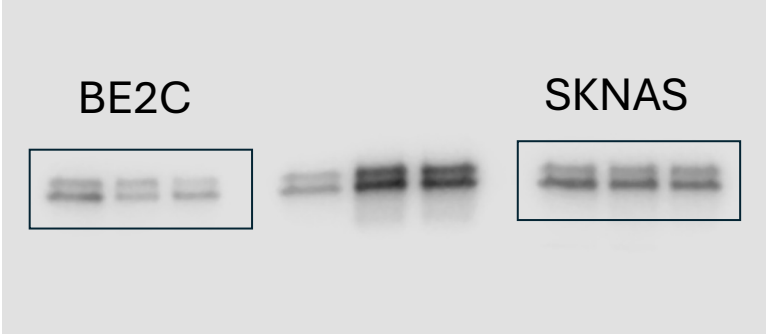

JMJD6

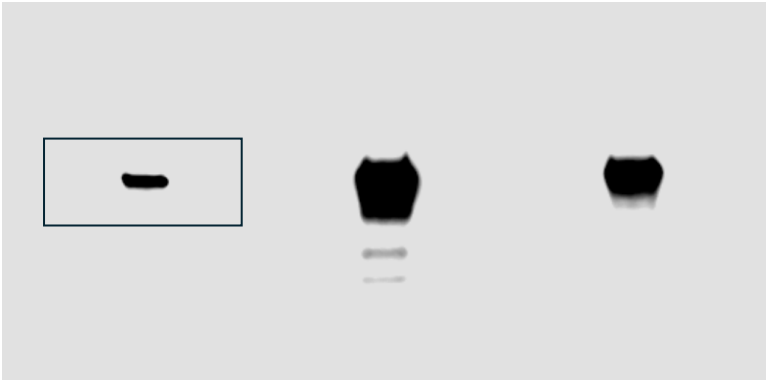

KGA  
(long exposure)

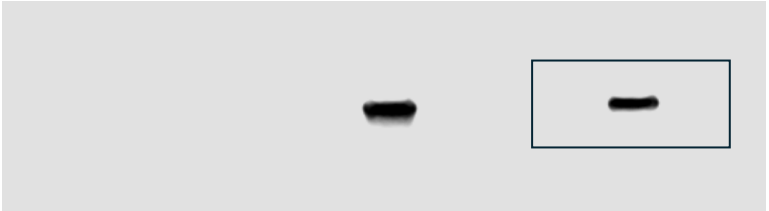

KGA  
(short exposure)

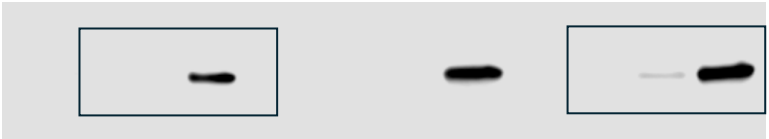

GAC

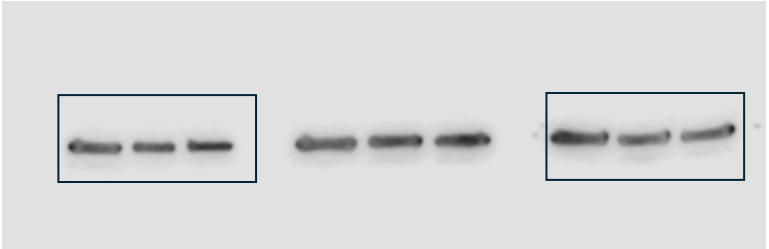

HSP90

Figure 5A

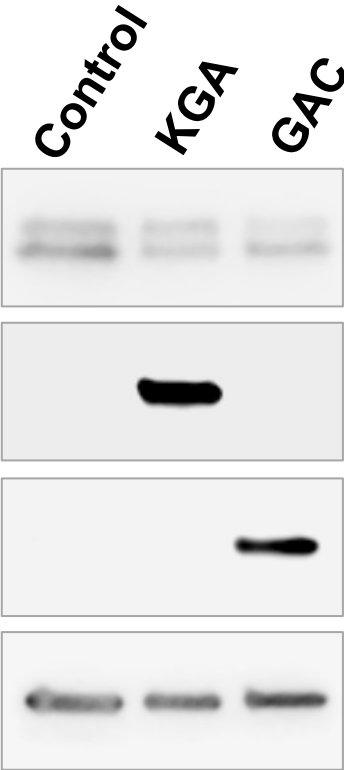

JMJD6

KGA

GAC

HSP90

Figure 5C

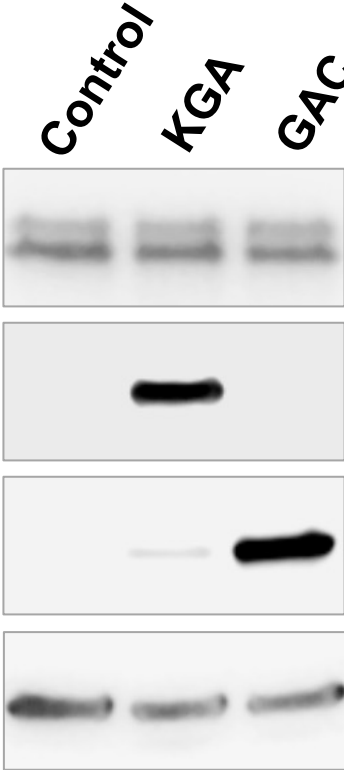

JMJD6

KGA

GAC

HSP90

Figure 5B

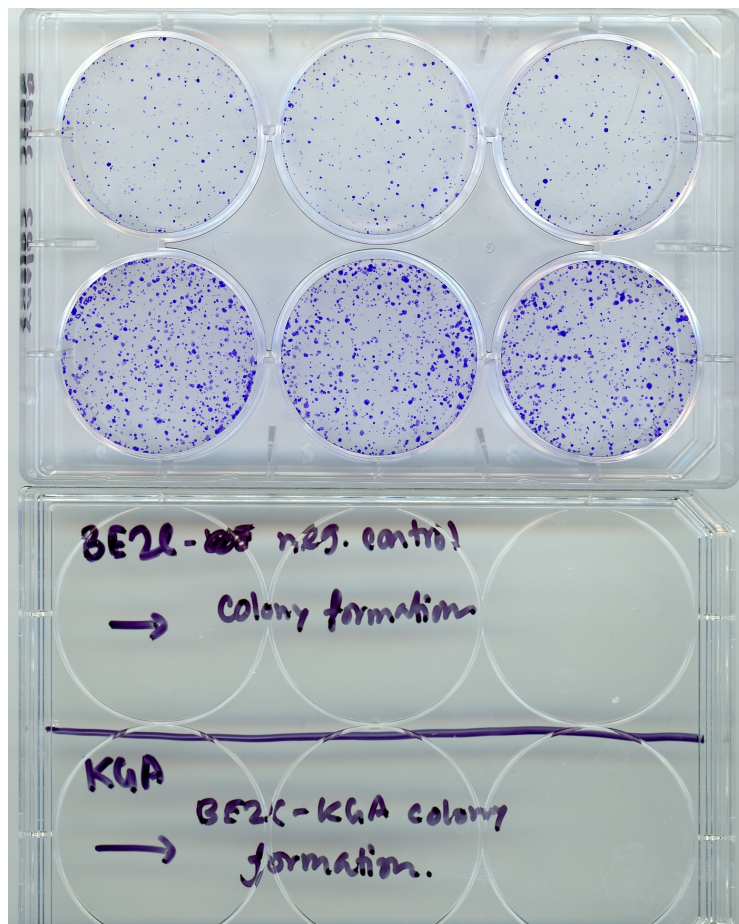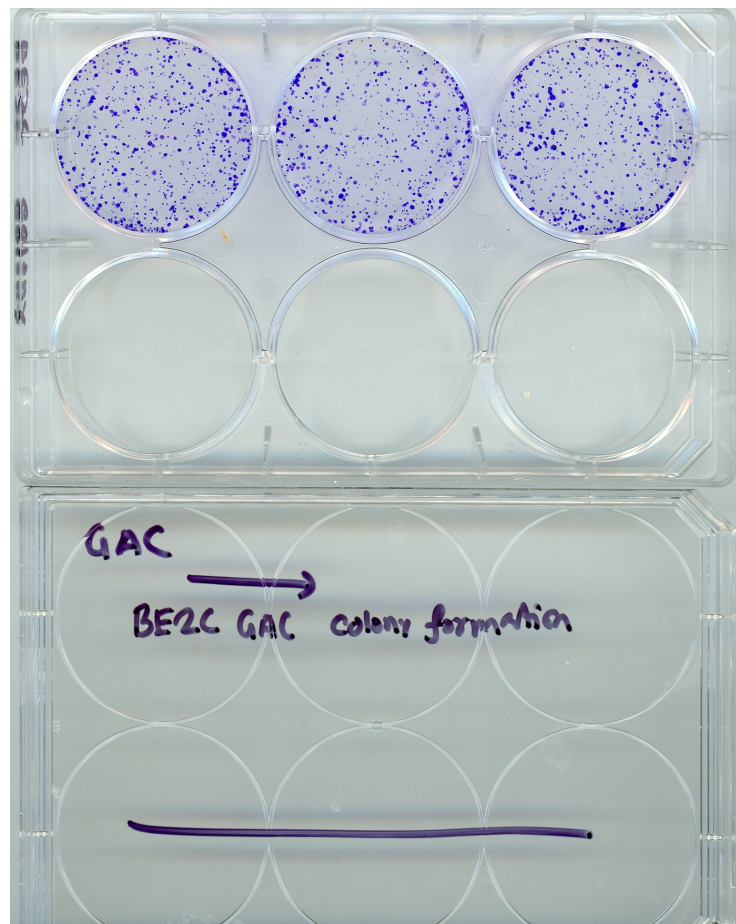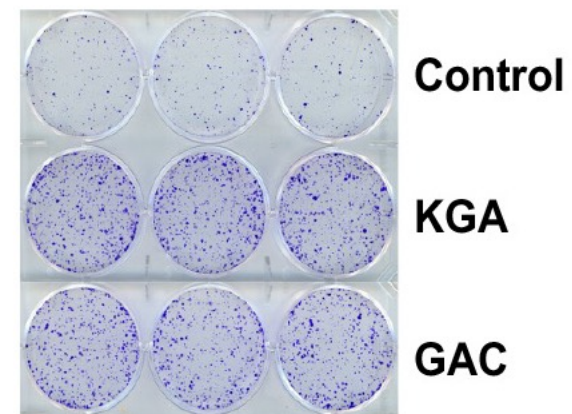

Figure 5D

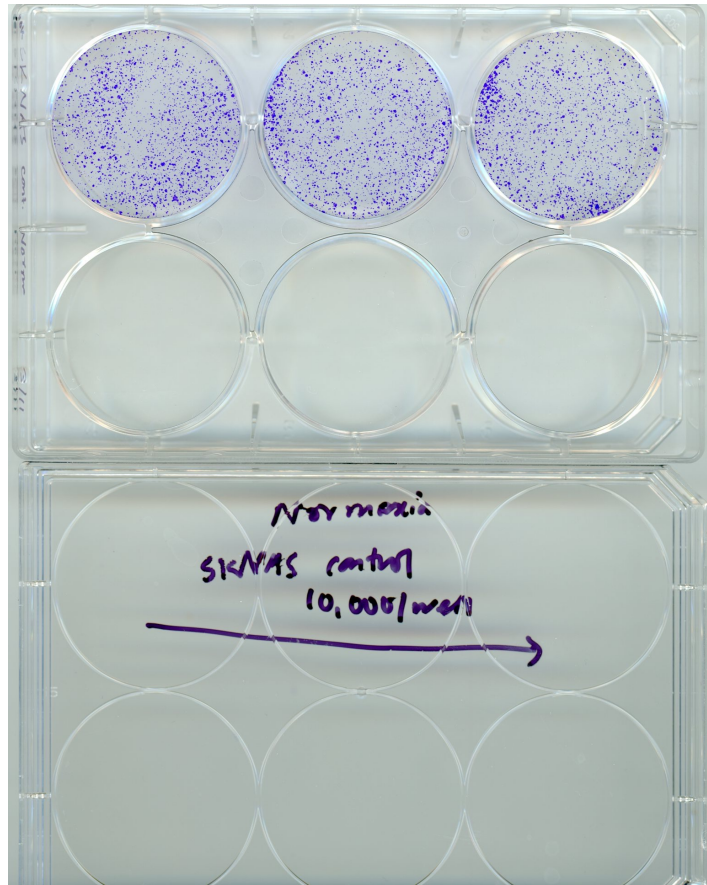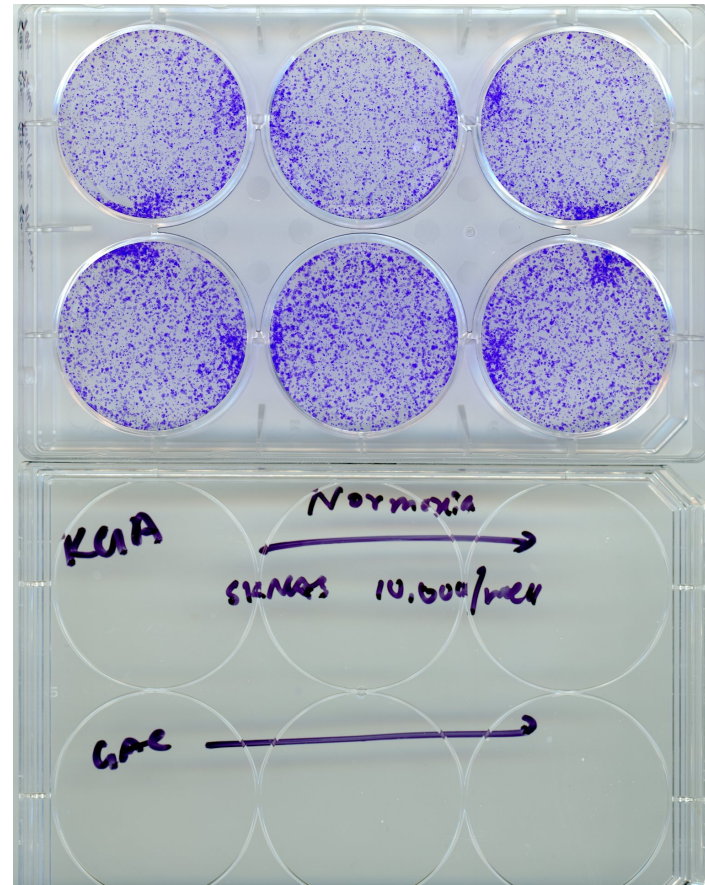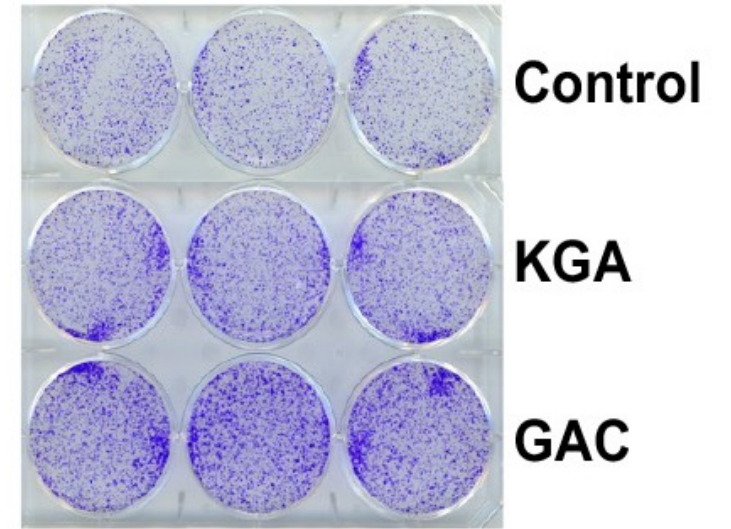



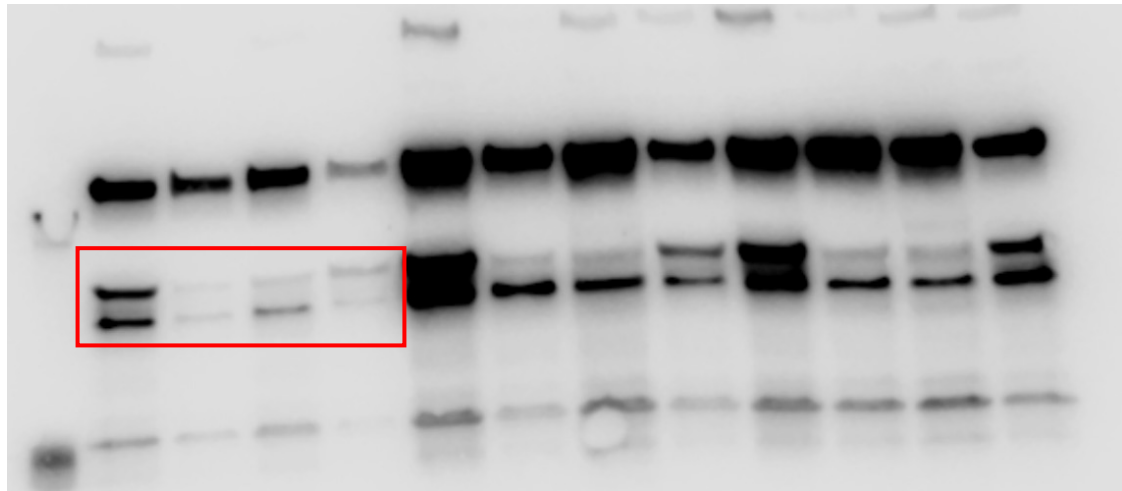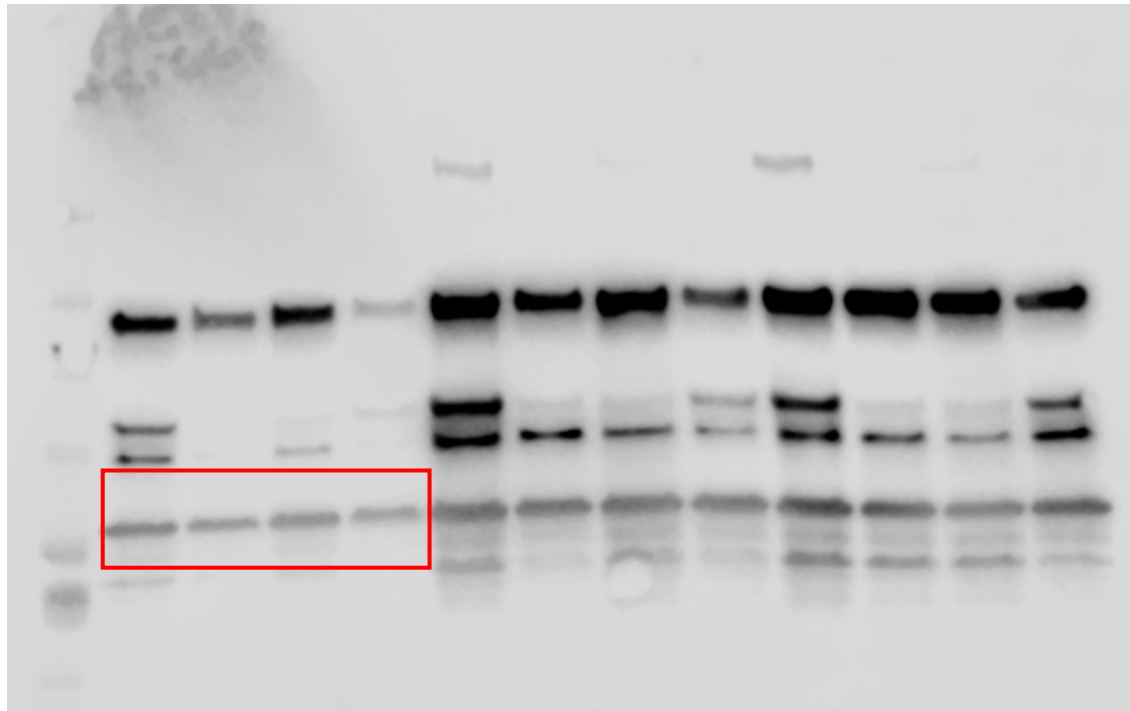

Figure 5G

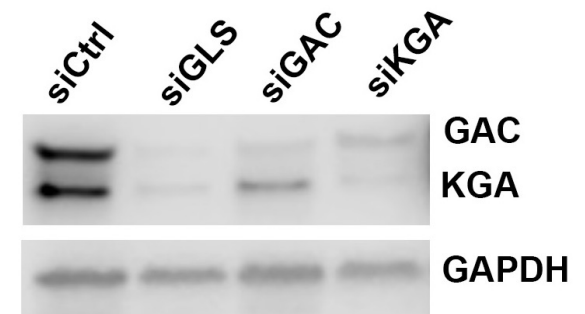

Figure 5H

BE2C  
siCtrl  
siGLS  
siGAC  
siKGA

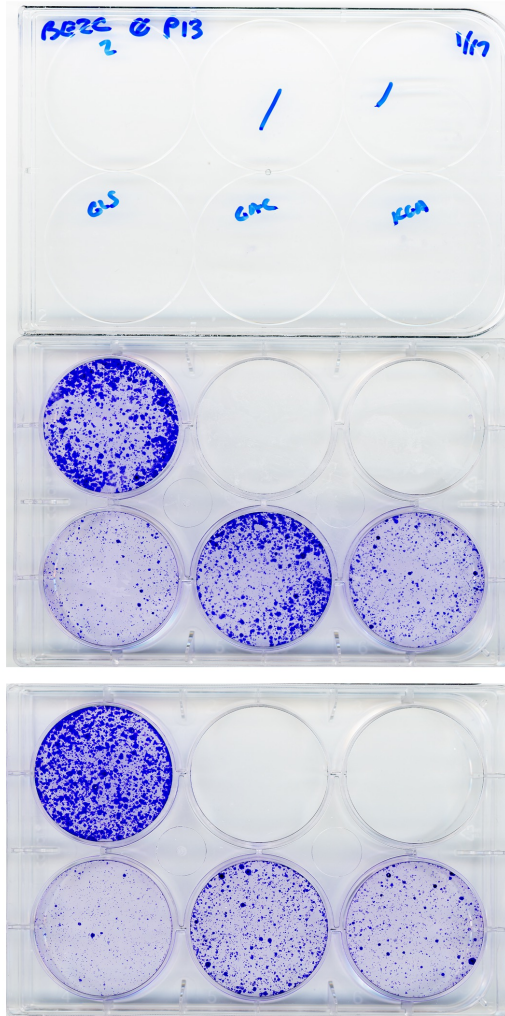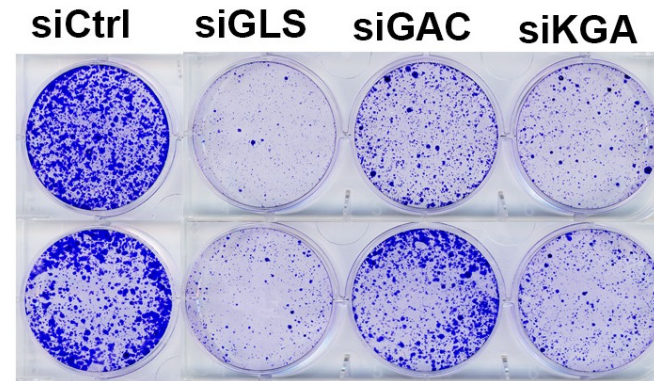

Supplement: data1 [file elife-90993-data1-v1.zip]
