# Supplementary material for: Metabolic reprogramming of cancer cells by JMJD6-mediated pre-mRNA splicing associated with therapeutic response to splicing inhibitor
Source: eLife journal article supplement (doi:10.7554/elife.90993), 2023-11-01
Supplement: data1 [file Figrue 7-data source.xlsx]

## Sheet: Figure 7A
Metabolite	WT-1	WT-2	WT-3	WT-4	WT-5	KO-1	KO-2	KO-3	KO-4	KO-5
2-PHOSPHOGLYCERATE	1.00204e+06	724436	443717	1.19943e+06	799693	114751	80756	134340	237617	297525
2,3-DIHYDROXYBENZOATE	624138	1.00894e+06	764953	748215	856627	485259	244534	589447	431582	563279
3-HYDROXYMETHYLGLUTARATE	729000	440433	350558	367231	471647	9093.52	9091.85	9096.37	9095.55	857091
4-GUANIDINOBUTANOATE	3.23884e+07	3.74947e+07	4.098e+07	4.43141e+07	4.40953e+07	8.18496e+06	5.2342e+06	7.19033e+06	9.76098e+06	7.12296e+06
6-PHOSPHOGLUCONATE	435701	631353	308582	581645	351671	9092.44	65585.8	9094.03	9092.94	9094.42
ADENOSINE TRIPHOSPHATE	2.00641e+07	1.02274e+07	1.51945e+07	2.13616e+07	1.79155e+07	697942	941038	1.01769e+06	956843	1.43365e+06
ASCORBATE	1.20891e+07	9.58295e+06	8.37522e+06	8.16835e+06	7.88342e+06	44301.9	9095.73	39397.1	70998.4	110057
BETA-GLYCEROPHOSPHATE	1.92174e+06	1.64487e+06	1.29667e+06	2.10353e+06	1.92228e+06	6.28869e+06	5.05485e+06	7.37925e+06	6.73341e+06	6.28954e+06
CITRATE	2.47342e+06	1.7337e+06	881699	1.58981e+06	1.69451e+06	762405	864843	658689	687337	1.2096e+06
CREATINE	1.21327e+07	1.37105e+07	1.16218e+07	1.23077e+07	1.26457e+07	7.41716e+06	7.36271e+06	4.67656e+06	8.28017e+06	7.57959e+06
CREATININE	698979	552342	539196	637432	893694	296697	353093	709662	351372	371623
CYTIDINE TRIPHOSPHATE	707870	264774	416926	856626	619620	9096.68	9094.87	9091.94	9094.88	9091.63
D-RIBOSE 5-PHOSPHATE	4.41337e+06	6.3156e+06	5.58042e+06	6.96425e+06	5.47186e+06	87784.5	114554	9094.39	9093.73	108166
DIHYDROXYACETONE PHOSPHATE	5.64667e+06	5.94318e+06	5.13619e+06	7.04777e+06	5.29512e+06	2.15359e+06	2.36805e+06	2.74318e+06	3.32634e+06	3.33706e+06
FUMARATE	1.88664e+06	2.23087e+06	1.50031e+06	1.70067e+06	2.27449e+06	1.35037e+06	1.0018e+06	1.01989e+06	1.196e+06	1.90133e+06
GLUCONATE	9.4842e+06	1.10175e+07	8.61192e+06	8.72755e+06	8.15095e+06	4.08765e+06	3.51098e+06	3.73825e+06	3.73965e+06	4.04243e+06
GUANIDINOSUCCINATE	2.65156e+06	3.3055e+06	1.89315e+06	1.72839e+06	58937.1	1.49624e+07	1.64167e+07	1.17054e+07	9.68411e+06	1.03475e+07
GUANOSINE DIPHOSPHATE	375379	150622	283956	621642	439160	9094.14	9095.42	9094.9	9094.14	9091.87
GUANOSINE DIPHOSPHATE MANNOSE	300536	270176	241085	247581	209490	56031	9093.03	78955.3	95908.1	83543
GUANOSINE TRIPHOSPHATE	745405	241224	560688	1.10596e+06	801784	9096.22	9094.68	9091.19	9096.12	9095.01
HOMOCYSTEINE	1.58134e+06	1.63748e+06	2.20454e+06	1.66129e+06	1.60424e+06	3.00883e+06	2.35081e+06	4.32782e+06	2.60658e+06	2.53379e+06
HYPOTAURINE	1.46854e+06	1.56073e+06	1.01253e+06	970078	846971	266948	267166	175727	348778	270956
MANNOSE	4.18586e+06	5.57088e+06	6.05834e+06	6.63221e+06	6.85139e+06	1.45515e+06	1.6262e+06	1.71048e+06	1.14707e+06	1.66318e+06
METHYLTHIOADENOSINE	2.45294e+07	1.99116e+07	1.74754e+07	2.50176e+07	3.17344e+07	8.92328e+06	6.31055e+06	7.77907e+06	9.73494e+06	9.90381e+06
N-ACETYLASPARTATE	1.74024e+06	2.98644e+06	1.89629e+06	1.12761e+06	769691	9092.29	9091.19	9095.48	9092.78	9091.15
N-ACETYLMETHIONINE	8.76175e+06	1.72641e+07	1.24021e+07	1.10007e+07	1.97865e+07	7.21726e+06	5.61136e+06	5.62473e+06	6.54093e+06	1.01103e+07
N-ACETYLNEURAMINATE	292478	245378	267754	299996	287765	493572	408058	968893	636246	517554
N-ACETYLPUTRESCINE	3.41104e+07	3.95253e+07	2.63872e+07	3.25235e+07	3.30178e+07	5.4069e+06	2.02095e+06	3.61174e+06	3.7848e+06	4.34341e+06
N-ACETYLSERINE	139268	101931	107187	74711	88359.5	94315.2	69415.9	38067.1	9094.25	9096.71
N-ALPHA-ACETYLLYSINE	2.26455e+06	2.68158e+06	3.62396e+06	3.24869e+06	2.7874e+06	2.55943e+06	1.55982e+06	2.08714e+06	2.01282e+06	1.89801e+06
O-SUCCINYL-HOMOSERINE	1.3921e+06	2.96864e+06	1.71038e+06	3.1358e+06	3.01265e+06	873425	867376	1.05573e+06	1.0866e+06	58936.5
OXOGLUTARATE	2.73441e+07	2.81453e+07	2.34576e+07	2.80406e+07	3.09399e+07	1.34491e+07	1.31924e+07	8.89885e+06	1.44759e+07	1.29258e+07
OXOGLUTARATE	1.80222e+06	1.86213e+06	1.73168e+06	3.10394e+06	3.1395e+06	1.01119e+06	916825	58958.3	1.04759e+06	905744
PHOSPHOENOLPYRUVATE	6.76197e+06	5.43185e+06	5.17166e+06	7.78744e+06	8.12923e+06	189682	250041	344085	355122	587403
SERINE	1.18651e+06	581931	535735	326292	283585	7.5021e+06	6.3418e+06	5.776e+06	7.40982e+06	6.55225e+06
TAURINE	5.00645e+07	5.64683e+07	5.04292e+07	4.68021e+07	4.37102e+07	2.67874e+07	2.49327e+07	3.04248e+07	2.56289e+07	2.66331e+07
TRYPTOPHAN	1.64446e+08	1.33843e+08	1.43507e+08	9.09389e+07	1.06834e+08	3.64691e+08	2.38426e+08	2.81889e+08	2.94997e+08	2.87601e+08
URIDINE DIPHOSPHATE GLUCURONIC ACID	1.59077e+06	588694	325280	1.48392e+06	692200	156043	126506	223398	195141	210524
URIDINE DIPHOSPHATE-N-ACETYLGALACTOSAMINE	1.53045e+07	1.24096e+07	1.08559e+07	1.69797e+07	1.13046e+07	5.28927e+06	4.29644e+06	8.63638e+06	8.18915e+06	6.81781e+06
URIDINE MONOPHOSPHATE	412314	248571	204962	384604	278196	162770	149669	233874	163910	197852
XANTHOSINE	2.54211e+06	2.70968e+06	3.3654e+06	3.58776e+06	3.29217e+06	1.4242e+06	1.19481e+06	1.26501e+06	1.25665e+06	1.69627e+06
ISOLEUCINE	887257	163604	54402.3	57325.1	146469	9095.56	49457.9	30711.7	9093.99	9091.21

## Sheet: Figure 7B
	total	expected	hits	Raw p	Holm p	FDR
Warburg Effect	58	2.27	10	3.5e-05	0.00343	0.00343
Citric Acid Cycle	32	1.25	6	0.00103	0.1	0.0416
Aspartate Metabolism	35	1.37	6	0.0017	0.163	0.0416
Gluconeogenesis	35	1.37	6	0.0017	0.163	0.0416
Fructose and Mannose Degradation	32	1.25	5	0.00652	0.612	0.128
Phosphatidylethanolamine Biosynthesis	12	0.469	3	0.00952	0.885	0.155
Pentose Phosphate Pathway	29	1.13	4	0.0234	1	0.327
Mitochondrial Electron Transport Chain	19	0.742	3	0.0347	1	0.425
Homocysteine Degradation	9	0.352	2	0.045	1	0.49
Purine Metabolism	74	2.89	6	0.062	1	0.536
Cardiolipin Biosynthesis	11	0.43	2	0.0655	1	0.536
Glycolysis	25	0.977	3	0.07	1	0.536
Glycine and Serine Metabolism	59	2.3	5	0.0744	1	0.536
Taurine and Hypotaurine Metabolism	12	0.469	2	0.0767	1	0.536
Methionine Metabolism	43	1.68	4	0.082	1	0.536
Phenylalanine and Tyrosine Metabolism	28	1.09	3	0.092	1	0.548
Urea Cycle	29	1.13	3	0.0999	1	0.548
Phosphatidylcholine Biosynthesis	14	0.547	2	0.101	1	0.548
Pyruvate Metabolism	48	1.88	4	0.112	1	0.58
Ammonia Recycling	32	1.25	3	0.125	1	0.614
Amino Sugar Metabolism	33	1.29	3	0.134	1	0.623
Alanine Metabolism	17	0.664	2	0.14	1	0.623
Arginine and Proline Metabolism	53	2.07	4	0.147	1	0.628
Spermidine and Spermine Biosynthesis	18	0.703	2	0.154	1	0.628
Nucleotide Sugars Metabolism	20	0.781	2	0.182	1	0.686
Lactose Synthesis	20	0.781	2	0.182	1	0.686
Pantothenate and CoA Biosynthesis	21	0.82	2	0.196	1	0.687
Betaine Metabolism	21	0.82	2	0.196	1	0.687
Transfer of Acetyl Groups into Mitochondria	22	0.859	2	0.211	1	0.713
Glycerolipid Metabolism	25	0.977	2	0.255	1	0.76
Cysteine Metabolism	26	1.02	2	0.27	1	0.76
Oxidation of Branched Chain Fatty Acids	26	1.02	2	0.27	1	0.76
Phytanic Acid Peroxisomal Oxidation	26	1.02	2	0.27	1	0.76
Biotin Metabolism	8	0.312	1	0.274	1	0.76
Selenoamino Acid Metabolism	28	1.09	2	0.3	1	0.76
Thiamine Metabolism	9	0.352	1	0.302	1	0.76
Phenylacetate Metabolism	9	0.352	1	0.302	1	0.76
Lactose Degradation	9	0.352	1	0.302	1	0.76
De Novo Triacylglycerol Biosynthesis	9	0.352	1	0.302	1	0.76
Malate-Aspartate Shuttle	10	0.391	1	0.33	1	0.808
Starch and Sucrose Metabolism	31	1.21	2	0.344	1	0.812
Glycerol Phosphate Shuttle	11	0.43	1	0.356	1	0.812
Trehalose Degradation	11	0.43	1	0.356	1	0.812
Glucose-Alanine Cycle	13	0.508	1	0.406	1	0.875
Pyrimidine Metabolism	59	2.3	3	0.409	1	0.875
Valine, Leucine and Isoleucine Degradation	60	2.34	3	0.42	1	0.875
Tryptophan Metabolism	60	2.34	3	0.42	1	0.875
Galactose Metabolism	38	1.48	2	0.443	1	0.905
Sphingolipid Metabolism	40	1.56	2	0.47	1	0.935
Beta Oxidation of Very Long Chain Fatty Acids	17	0.664	1	0.495	1	0.935
Phosphatidylinositol Phosphate Metabolism	17	0.664	1	0.495	1	0.935
Propanoate Metabolism	42	1.64	2	0.496	1	0.935
Butyrate Metabolism	19	0.742	1	0.534	1	0.944
Ethanol Degradation	19	0.742	1	0.534	1	0.944
Catecholamine Biosynthesis	20	0.781	1	0.553	1	0.944
Riboflavin Metabolism	20	0.781	1	0.553	1	0.944
Threonine and 2-Oxobutanoate Degradation	20	0.781	1	0.553	1	0.944
Glutathione Metabolism	21	0.82	1	0.571	1	0.944
Glutamate Metabolism	49	1.91	2	0.582	1	0.944
Sulfate/Sulfite Metabolism	22	0.859	1	0.588	1	0.944
Carnitine Synthesis	22	0.859	1	0.588	1	0.944
Androstenedione Metabolism	24	0.938	1	0.62	1	0.953
Estrone Metabolism	24	0.938	1	0.62	1	0.953
Inositol Phosphate Metabolism	26	1.02	1	0.65	1	0.953
Plasmalogen Synthesis	26	1.02	1	0.65	1	0.953
Mitochondrial Beta-Oxidation of Short Chain Saturated Fatty Acids	27	1.05	1	0.664	1	0.953
Mitochondrial Beta-Oxidation of Medium Chain Saturated Fatty Acids	27	1.05	1	0.664	1	0.953
Mitochondrial Beta-Oxidation of Long Chain Saturated Fatty Acids	28	1.09	1	0.677	1	0.953
Pterine Biosynthesis	29	1.13	1	0.69	1	0.953
Phospholipid Biosynthesis	29	1.13	1	0.69	1	0.953
Folate Metabolism	29	1.13	1	0.69	1	0.953
Lysine Degradation	30	1.17	1	0.703	1	0.956
Bile Acid Biosynthesis	65	2.54	2	0.737	1	0.963
Inositol Metabolism	33	1.29	1	0.737	1	0.963
Androgen and Estrogen Metabolism	33	1.29	1	0.737	1	0.963
Beta-Alanine Metabolism	34	1.33	1	0.748	1	0.964
Nicotinate and Nicotinamide Metabolism	37	1.45	1	0.777	1	0.989
Tyrosine Metabolism	72	2.81	2	0.788	1	0.99
Porphyrin Metabolism	40	1.56	1	0.803	1	0.996
Histidine Metabolism	43	1.68	1	0.826	1	1
Fatty acid Metabolism	43	1.68	1	0.826	1	1
Steroid Biosynthesis	48	1.88	1	0.859	1	1

## Sheet: Figure 7D
Feature	Correlation	:-LOG10(PValue)
lactose	-0.104931	2.04106
sucrose	-0.102493	1.96448
C52:4 TAG	-0.0940414	1.7106
C54:5 TAG	-0.0931977	1.68624
C50:3 TAG	-0.0914701	1.6369
C52:3 TAG	-0.0911657	1.62828
C46:2 TAG	-0.087503	1.52639
C48:3 TAG	-0.0836822	1.42361
carnosine	-0.0828289	1.40114
C52:5 TAG	-0.081804	1.37439
C54:4 TAG	-0.0797359	1.32118
C54:7 TAG	-0.074856	1.19971
arginine	-0.0740985	1.18137
oleylcarnitine	-0.0734336	1.16538
anserine	-0.0701606	1.08821
hippurate	-0.0696337	1.07602
C54:3 TAG	-0.0691221	1.06425
ornithine	-0.0666029	1.00719
2-deoxyadenosine	-0.0665335	1.00564
C54:6 TAG	-0.0658402	0.990203
methionine sulfoxide	-0.0656106	0.985119
C48:2 TAG	-0.0646324	0.963589
palmitoylcarnitine	-0.0622436	0.911948
C18:1 CE	-0.0620704	0.908253
taurodeoxycholate/taurochenodeoxycholate	-0.059546	0.855215
C56:4 TAG	-0.0570131	0.80347
C56:5 TAG	-0.0569205	0.801605
kynurenic acid	-0.0563712	0.790588
C34:3 PC	-0.0544004	0.751624
myristoylcarnitine	-0.0537569	0.73909
hexoses (HILIC neg)	-0.0527598	0.719858
hexoses (HILIC pos)	-0.0516311	0.698354
isoleucine	-0.050607	0.679091
C20:3 CE	-0.0502151	0.671781
C18:2 CE	-0.0498697	0.665369
C34:4 PC	-0.048855	0.646678
C18:3 CE	-0.0486063	0.642133
5-HIAA	-0.0485226	0.640607
homocysteine	-0.0481828	0.634425
thymine	-0.0477295	0.626217
C16:0 CE	-0.0472662	0.617876
C16:1 CE	-0.0465836	0.605672
C56:3 TAG	-0.0456621	0.589361
NMMA	-0.0438259	0.557413
C56:6 TAG	-0.0432025	0.546734
C50:2 TAG	-0.0428503	0.540738
arachidonyl_carnitine	-0.042695	0.538102
C32:2 PC	-0.0412035	0.51306
C58:6 TAG	-0.0401254	0.495257
C34:2 PC	-0.0388237	0.474095
dimethylglycine	-0.0386266	0.470922
C56:7 TAG	-0.0385773	0.470131
C22:6 LPC	-0.0385093	0.469039
NADP	-0.0384341	0.467833
C58:7 TAG	-0.0370229	0.445417
lauroylcarnitine	-0.0364762	0.436847
C18:0 CE	-0.0361211	0.431315
C58:8 TAG	-0.0342866	0.403158
SDMA/ADMA	-0.0339063	0.39741
C20:4 CE	-0.0329175	0.382606
thyroxine	-0.0325649	0.377376
stearoylcarnitine	-0.0324368	0.375482
C18:1 LPC	-0.0324156	0.375169
C20:5 CE	-0.0315648	0.362683
C16:1 LPC	-0.0306434	0.34933
uracil	-0.0303186	0.344665
cis/trans-hydroxyproline	-0.029607	0.334519
allantoin	-0.0290821	0.327103
DHAP/glyceraldehyde 3P	-0.0290603	0.326797
leucine	-0.0288259	0.323504
methionine	-0.0286681	0.321294
C18:2 LPC	-0.0278505	0.309923
hypoxanthine	-0.0255035	0.278038
xanthine	-0.0240961	0.259451
C52:2 TAG	-0.0229098	0.244092
lactate	-0.0218741	0.230911
niacinamide	-0.0217704	0.229604
C46:1 TAG	-0.0208453	0.218029
creatinine	-0.0204009	0.212528
ribose-5-P/ribulose5-P	-0.0194804	0.201258
anthranilic acid	-0.018236	0.186284
malondialdehyde	-0.0178896	0.182169
histidine	-0.017779	0.18086
serotonin	-0.0170583	0.172388
3-phosphoglycerate	-0.0170142	0.171873
sorbitol	-0.0162622	0.163146
xanthosine	-0.0153961	0.15323
C40:6 PC	-0.0149103	0.147731
succinate/methylmalonate	-0.0122218	0.118098
taurocholate	-0.0115806	0.111232
PEP	-0.011217	0.107371
cAMP	-0.0108872	0.103891
C14:0 CE	-0.0106954	0.101877
pyroglutamic acid	-0.0106533	0.101435
betaine	-0.0104913	0.09974
C54:1 TAG	-0.00990387	0.0936336
C54:2 TAG	-0.00956535	0.0901434
oxalate	-0.008361	0.0778963
cotinine	-0.00808402	0.075117
urate	-0.00786389	0.072918
tryptophan	-0.00757243	0.07002
adenosine	-0.00698652	0.0642405
asparagine	-0.00644185	0.0589233
C36:2 PC	-0.00628347	0.057387
3-methyladipate/pimelate	-0.00539877	0.0488881
glutamine	-0.00504158	0.0454962
C18:1 SM	-0.00498286	0.0449407
lysine	-0.00413409	0.0369799
glutathione oxidized	-0.00403723	0.0360796
valerylcarnitine/isovalerylcarnitine/2-methylbutyroylcarnitine	-0.00331313	0.0294005
4-pyridoxate	-0.00242953	0.0213742
C36:3 PC	-0.00115566	0.0100408
C20:4 LPC	-0.000813601	0.00704507
C14:0 SM	-0.000658031	0.00568924
C16:0 SM	-0.000545234	0.00470877
dCMP	-0.000397712	0.00342974
thymidine	0.000707184	0.00611717
C18:2 SM	0.000872474	0.00755924
N-carbamoyl-beta-alanine	0.0010623	0.00922111
adipate	0.00106435	0.0092391
C46:0 TAG	0.00267195	0.0235627
6-phosphogluconate	0.00273961	0.0241753
C50:0 TAG	0.00286454	0.0253087
C22:6 CE	0.00309651	0.0274202
C22:1 SM	0.00406521	0.0363394
tyrosine	0.00418785	0.0374804
F1P/F6P/G1P/G6P	0.00486806	0.0438566
citrulline	0.00501372	0.0452326
C38:4 PC	0.00681116	0.0625228
glycodeoxycholate/glycochenodeoxycholate	0.00732859	0.0676073
C24:0 SM	0.00744308	0.0687388
C56:2 TAG	0.00785331	0.0728125
C18:0 LPC	0.00826304	0.0769117
C16:0 LPC	0.00847092	0.0790031
putrescine	0.00848208	0.0791156
hexanoylcarnitine	0.00996966	0.0943143
phenylalanine	0.0110894	0.106022
C48:1 TAG	0.0124079	0.120106
C36:4 PC-B	0.012643	0.122651
phosphocreatine	0.0141117	0.138786
C16:1 SM	0.0142612	0.140451
C48:0 TAG	0.0147726	0.146179
alpha-glycerophosphocholine	0.0148415	0.146955
isocitrate	0.0148742	0.147323
glucuronate	0.0148915	0.147519
C20:3 LPC	0.0154364	0.153689
uridine	0.0168326	0.169756
C52:1 TAG	0.0174036	0.176434
C32:1 PC	0.0179946	0.183414
C36:4 PC-A	0.018493	0.189351
adenine	0.0193259	0.199383
erythrose-4-phosphate	0.0196834	0.203729
valine	0.0199442	0.206916
C36:1 PC	0.0226917	0.241298
aconitate	0.02272	0.241662
alpha-glycerophosphate	0.0229078	0.244067
C24:1 SM	0.0230502	0.245895
C18:0 SM	0.023909	0.25701
trimethylamine-N-oxide	0.024466	0.264298
heptanoylcarnitine	0.0253654	0.276197
C22:0 SM	0.0255387	0.278508
thiamine	0.0265067	0.29153
guanosine	0.0271778	0.300671
pantothenate	0.0273432	0.302937
C34:1 PC	0.0288229	0.323462
carnitine	0.029121	0.32765
malonylcarnitine	0.0296138	0.334616
C34:2 DAG	0.0301886	0.342803
C56:8 TAG	0.0305122	0.347443
C50:1 TAG	0.0310328	0.354951
C38:5 PC	0.0313016	0.358851
inositol	0.0317798	0.365823
C18:1 LPE	0.0330501	0.384578
5-adenosylhomocysteine	0.0333601	0.389206
aspartate	0.0334443	0.390467
acetylglycine	0.0343292	0.403804
propionylcarnitine	0.0356214	0.423575
C18:0 LPE	0.0356779	0.424448
choline	0.0362752	0.433713
serine	0.0397422	0.48899
taurine	0.0400962	0.494779
butyrylcarnitine/isobutyrylcarnitine	0.0418045	0.523092
C36:2 DAG	0.0425201	0.53514
C22:6 LPE	0.0426834	0.537905
C38:2 PC	0.0432032	0.546745
2-aminoadipate	0.0433303	0.548915
C14:0 LPC	0.0435171	0.552112
UDP-galactose/UDP-glucose	0.0453277	0.583487
glutathione reduced	0.0463165	0.600926
fumarate/maleate/alpha-ketoisovalerate	0.046664	0.607103
citrate	0.0486787	0.643455
malate	0.049364	0.656025
C16:0 LPE	0.0497189	0.662576
pipecolic acid	0.0507881	0.68248
sarcosine	0.0537201	0.738377
acetylcholine	0.0541803	0.747326
creatine	0.0555674	0.77459
C38:6 PC	0.0569476	0.802151
NAD	0.0591065	0.846132
alanine	0.060696	0.879195
2-deoxycytidine	0.0608978	0.883436
UMP	0.0614163	0.89437
threonine	0.0643809	0.95809
C34:1 DAG	0.064954	0.970642
GMP	0.0674447	1.02609
proline	0.0697551	1.07882
butyrobetaine	0.072699	1.14784
GABA	0.0733578	1.16356
kynurenine	0.0738849	1.17622
C32:0 PC	0.0742411	1.18481
inosine	0.0745348	1.19192
C20:4 LPE	0.0772074	1.25753
acetylcarnitine	0.0804772	1.34013
cytidine	0.0816653	1.37079
1-methylnicotinamide	0.0817432	1.37281
cystathionine	0.0834049	1.41629
C36:1 DAG	0.0835478	1.42006
CMP	0.0835686	1.42061
glycine	0.0892568	1.57477
alpha-ketoglutarate	0.0906891	1.61484
alpha-hydroxybutyrate	0.0964837	1.78213
2-hydroxyglutarate	0.0966326	1.78654
beta-alanine	0.10548	2.05851
glutamate	0.108511	2.15623
AMP	0.113654	2.3274
