# Supplementary material for: Metabolic reprogramming of cancer cells by JMJD6-mediated pre-mRNA splicing associated with therapeutic response to splicing inhibitor
Source: eLife journal article supplement (doi:10.7554/elife.90993), 2023-11-01
Supplement: data1 [file Figure 1 data source.xlsx]

## Sheet: Figure 1A
	Score (mean)
PSMB3	-1.70908
RPL23	-1.55207
SRSF2	-1.37152
KPNB1	-1.36721
SUPT6H	-1.364
LUC7L3	-1.34514
CDC27	-1.3237
TBC1D3C	-1.28837
BIRC5	-1.28067
RPL27	-1.25966
SAP30BP	-1.23084
ANAPC11	-1.22087
TBC1D3H	-1.18619
RPL19	-1.18471
DHX8	-1.15673
VPS25	-1.14625
CHMP6	-1.13
TOP2A	-1.10624
CLTC	-1.06975
CDC6	-1.0487
UBTF	-1.0264
ARMC7	-1.00629
PSMC5	-0.993121
EIF4A3	-0.963495
RPL23A	-0.933383
ZNF830	-0.907255
NLE1	-0.894331
TUBG1	-0.889175
PHB	-0.885517
NMT1	-0.860013
EFTUD2	-0.840201
USP36	-0.837127
DDX42	-0.835476
MRPS23	-0.820417
PGS1	-0.794135
GRB2	-0.79045
MED1	-0.759595
MRPL10	-0.752645
GPS1	-0.752557
RPL38	-0.746742
CEP131	-0.746255
PHF12	-0.745153
ZNF207	-0.72572
EIF1	-0.708543
FDXR	-0.707483
NPLOC4	-0.700893
RPTOR	-0.698321
MRPL27	-0.696032
MRPL45	-0.683009
TSEN54	-0.676763
MRPL12	-0.674971
RAD51D	-0.66889
TMEM199	-0.666353
SUMO2	-0.660283
VMP1	-0.654563
KRTAP4-2	-0.652656
GOSR2	-0.651342
SNF8	-0.649813
SMARCE1	-0.640171
ZNHIT3	-0.637832
C17orf82	-0.627919
BRCA1	-0.618631
STAT5A	-0.59976
MRPL38	-0.598306
UTP18	-0.587924
SRP68	-0.586188
EPN3	-0.56948
COASY	-0.564796
MRPS7	-0.560167
SLC25A10	-0.558129
PPY	-0.54126
RAC3	-0.540325
TEN1	-0.539205
LRRC37A3	-0.524555
SLC35B1	-0.52364
AATF	-0.522698
NDUFA8	-0.522228
KLHL11	-0.517332
NPB	-0.512146
NPEPPS	-0.511675
RAD51C	-0.500425
ARL4D	-0.498956
COX11	-0.49884
LSM12	-0.496736
METTL23	-0.493223
POLG2	-0.492706
HGS	-0.490992
GSDMA	-0.487737
DDX5	-0.482114
DDX52	-0.481511
LRRC37B	-0.477327
EXOC7	-0.47458
KRT10	-0.471996
TBC1D3B	-0.45717
SMG8	-0.455955
CSH2	-0.453161
TUBD1	-0.451501
UBE2O	-0.449883
ALYREF	-0.44607
JMJD6	-0.443166
INTS2	-0.439706
ERAL1	-0.437696
SUPT4H1	-0.437334
KANSL1	-0.431211
CBX1	-0.429446
SLC16A5	-0.422236
BRIP1	-0.422063
PPM1E	-0.420955
C17orf58	-0.420712
ATP5G1	-0.411962
UTP6	-0.410828
FTSJ3	-0.410498
COG1	-0.410318
TADA2A	-0.409419
NAGLU	-0.399274
KRTAP9-4	-0.395781
PYCR1	-0.391331
MBTD1	-0.389587
MED24	-0.387007
COIL	-0.38639
CCDC43	-0.385214
XYLT2	-0.383306
FBXO47	-0.38195
NOL11	-0.374667
ZACN	-0.374547
RSAD1	-0.369807
MXRA7	-0.368581
SCPEP1	-0.367434
KIF18B	-0.365947
RFFL	-0.35724
SP2	-0.357203
KRTAP4-7	-0.35535
SLC25A19	-0.353589
PROCA1	-0.349662
BCAS3	-0.348746
MSI2	-0.348141
C17orf105	-0.345942
TEFM	-0.344407
USH1G	-0.337589
MSL1	-0.336956
GJC1	-0.3362
ATXN7L3	-0.33448
UBE2Z	-0.333104
CCDC137	-0.332048
LGALS3BP	-0.33114
GALK1	-0.331084
CWC25	-0.330496
BTBD17	-0.329808
GPR179	-0.328881
MYO18A	-0.32642
CNTNAP1	-0.321717
SPAG5	-0.321469
ASPSCR1	-0.319575
TBKBP1	-0.317904
TBC1D29	-0.317799
H3F3B	-0.317086
CDK12	-0.31679
CNP	-0.314212
OR4D2	-0.313628
LIMD2	-0.313335
TMEM97	-0.312272
SLC16A3	-0.3105
SLC35G3	-0.307429
9-Sep	-0.307131
MPP3	-0.304355
CPD	-0.304102
CYB561	-0.303447
ZPBP2	-0.299137
DGKE	-0.298315
KRT17	-0.294903
DLX3	-0.294394
SKAP1	-0.293299
TLCD1	-0.292827
C17orf53	-0.291623
SUZ12	-0.287254
ACLY	-0.285435
PRAC1	-0.284797
BPTF	-0.284005
SOX9	-0.28258
TMEM104	-0.281507
SOCS3	-0.281374
IGF2BP1	-0.281055
LIG3	-0.280482
ASB16	-0.278233
NACA2	-0.276502
SSH2	-0.275394
TLK2	-0.275152
ADAM11	-0.274933
HEXIM1	-0.274743
TEX2	-0.274722
MIEN1	-0.271487
AARSD1	-0.269745
PIGS	-0.269682
SCRN2	-0.268981
TBC1D16	-0.268454
RDM1	-0.265165
MLX	-0.26513
PLEKHM1	-0.264513
RBFOX3	-0.263421
CACNA1G	-0.263079
PRKCA	-0.261301
GAS2L2	-0.26031
PRR15L	-0.259567
FMNL1	-0.258027
KAT7	-0.257717
G6PC	-0.257319
GGNBP2	-0.256832
KRTAP2-4	-0.25334
C17orf62	-0.250616
MAFG	-0.250067
GPATCH8	-0.248246
CCDC182	-0.247384
KIAA0100	-0.246958
SPAG9	-0.246288
NME2	-0.242819
ACTG1	-0.241607
GSDMB	-0.241177
COA3	-0.240082
ACE	-0.239488
PDK2	-0.238607
SMURF2	-0.237922
KRT28	-0.237816
DCXR	-0.236898
STAT5B	-0.23566
KRTAP4-3	-0.234921
GH2	-0.234498
SPPL2C	-0.232079
OSBPL7	-0.231218
ATAD5	-0.229822
ABCC3	-0.229755
CACNB1	-0.229312
HEATR6	-0.228585
LRRC3C	-0.228558
NME1-NME2	-0.227876
C17orf50	-0.225903
SGCA	-0.225777
FSCN2	-0.225753
TBX2	-0.224713
ARHGAP23	-0.224384
CASC3	-0.223519
TMEM101	-0.223368
DCAKD	-0.221448
KRT31	-0.220436
RAB11FIP4	-0.220228
ENGASE	-0.220196
KCTD2	-0.217766
KPNA2	-0.215524
TMEM235	-0.214959
TUBG2	-0.214675
MPO	-0.213929
ENPP7	-0.213679
MYL4	-0.213635
GDPD1	-0.213403
RHBDF2	-0.212897
MAP3K3	-0.211661
C17orf75	-0.211588
NBR1	-0.211359
LRRC45	-0.211312
C1QTNF1	-0.211005
TBX21	-0.210874
PIGW	-0.210657
PPM1D	-0.210439
MYCBPAP	-0.210051
SMIM5	-0.209375
HOXB5	-0.208656
SLC38A10	-0.207814
CORO6	-0.207328
RAB5C	-0.206645
CYTH1	-0.205207
AATK	-0.205018
OTOP2	-0.204996
HNF1B	-0.203747
HEXIM2	-0.202017
KRTAP4-4	-0.201021
CCL1	-0.200326
KRTAP9-8	-0.200118
BAIAP2	-0.198442
NGFR	-0.195984
ERBB2	-0.195771
MIF4GD	-0.195712
KRTAP9-2	-0.194907
ACACA	-0.194533
GJD3	-0.193352
ITGA2B	-0.190749
PNPO	-0.19009
FOXN1	-0.189794
HOXB3	-0.189751
HID1	-0.189494
GPR142	-0.189161
PPP1R1B	-0.185865
GFAP	-0.185032
CANT1	-0.184692
ATP6V0A1	-0.184481
SEZ6	-0.184188
GNAT2	-0.184163
ARHGDIA	-0.184053
CASKIN2	-0.182324
OXLD1	-0.182311
HAP1	-0.181653
USP32	-0.181371
DUSP3	-0.181358
ANKRD40	-0.180452
SYNGR2	-0.179336
SECTM1	-0.178449
IKZF3	-0.177213
RASL10B	-0.176909
UNK	-0.176227
NPTX1	-0.176007
LRRC46	-0.175713
CA4	-0.175425
PPP1R27	-0.174527
KRTAP17-1	-0.173873
LRRC37A	-0.172243
PGAP3	-0.17221
HOXB8	-0.172009
AOC2	-0.172007
KRT25	-0.171081
KRT16	-0.169565
TTYH2	-0.168653
NME1	-0.16864
PCGF2	-0.168175
PHOSPHO1	-0.167967
PSME3	-0.167679
ARHGAP27	-0.16728
CA10	-0.166686
HSPB9	-0.165644
UNC119	-0.164619
ABCA5	-0.163226
TRIM37	-0.162875
FBF1	-0.162825
SIRT7	-0.16265
AANAT	-0.162228
FZD2	-0.162158
FADS6	-0.161401
ARL5C	-0.161116
ST6GALNAC1	-0.160275
CCT6B	-0.159456
EFCAB5	-0.159246
KRT33A	-0.158753
CPSF4L	-0.158695
DUS1L	-0.158172
HLF	-0.158096
NARF	-0.157438
SKA2	-0.156273
EPX	-0.155831
ADAP2	-0.155273
WNK4	-0.154799
FKBP10	-0.154238
TACO1	-0.153663
TOM1L1	-0.15355
CCL16	-0.153322
HOXB9	-0.152193
LPO	-0.151936
WBP2	-0.151913
SLFN13	-0.151268
CYGB	-0.149072
WSB1	-0.147927
MYO1D	-0.146358
GRN	-0.146085
TBX4	-0.146024
CCL5	-0.145369
BECN1	-0.145102
STH	-0.143804
RAB40B	-0.143768
LRRC37A2	-0.143557
HOXB7	-0.143508
TRAF4	-0.142119
MTMR4	-0.1404
FAM117A	-0.14019
TEX19	-0.140081
EFCAB3	-0.139341
ENDOV	-0.139036
SLC25A39	-0.138867
KRTAP4-8	-0.138611
ORMDL3	-0.138257
KRTAP1-3	-0.137618
CRLF3	-0.137568
SLC9A3R1	-0.136976
MKS1	-0.136365
MED13	-0.135083
VTN	-0.134142
IFI35	-0.133938
VAT1	-0.133922
AFMID	-0.133789
EZH1	-0.133414
FASN	-0.132288
PCTP	-0.132274
RAPGEFL1	-0.131938
ABCA8	-0.131102
ST6GALNAC2	-0.130759
STARD3	-0.129958
DHX58	-0.129632
CD79B	-0.128401
MRM1	-0.128171
ZNF750	-0.12768
ALDOC	-0.127336
KAT2A	-0.127127
FOXK2	-0.124794
WFIKKN2	-0.123093
TIAF1	-0.123074
VEZF1	-0.121905
CDK5RAP3	-0.121349
CSNK1D	-0.120956
CRYBA1	-0.120327
DHX40	-0.120222
RND2	-0.120178
ACOX1	-0.119772
CEP112	-0.119571
CDC42EP4	-0.117885
KCNH6	-0.117423
TMUB2	-0.11684
SEBOX	-0.116235
CD300E	-0.115931
HEATR9	-0.115366
TMIGD1	-0.115252
CACNG4	-0.112002
LASP1	-0.111489
ACSF2	-0.110953
SLC13A2	-0.110809
ITGB3	-0.109773
HSF5	-0.109136
FAM20A	-0.1087
PTRH2	-0.108052
SDK2	-0.107893
SLC26A11	-0.107375
RHOT1	-0.107323
CDK3	-0.107216
PCYT2	-0.106897
KRT23	-0.106466
EVI2A	-0.10606
CD300LG	-0.106019
EFCAB13	-0.105468
TEX14	-0.105283
CSHL1	-0.105182
CCR10	-0.105153
TRIM65	-0.104701
DBF4B	-0.104511
RAB37	-0.104438
HSD17B1	-0.104382
P4HB	-0.10432
ABHD15	-0.104235
GAA	-0.103303
METRNL	-0.103242
KRTAP4-11	-0.103077
HOXB6	-0.102258
SPHK1	-0.0999503
TMEM106A	-0.0993735
NAT9	-0.098378
CACNG1	-0.0978401
UNC45B	-0.0969615
AOC3	-0.0968458
ERN1	-0.0968443
TNRC6C	-0.0964966
FN3K	-0.096077
FN3KRP	-0.0957966
RHBDL3	-0.0954283
MPP2	-0.0945858
PRR11	-0.094308
GNA13	-0.0933326
HDAC5	-0.0931099
LRRC59	-0.0916041
CCDC40	-0.0915427
SMARCD2	-0.0908979
THRA	-0.089856
C17orf99	-0.0891822
HELZ	-0.0890279
MARCH10	-0.0889655
MMP28	-0.08871
KLHL10	-0.0884739
TOB1	-0.0879142
GAST	-0.0868141
RAMP2	-0.0859682
SOCS7	-0.0859252
STRADA	-0.085666
KRT32	-0.0848092
SEPT4	-0.0847584
CBX2	-0.0834924
FLOT2	-0.08272
KRTAP9-6	-0.082052
HIGD1B	-0.0816298
MAP2K6	-0.0815184
C17orf77	-0.0815074
KCNH4	-0.0799496
SDF2	-0.0757961
KRTAP9-9	-0.0757505
SPATA20	-0.0752963
GIP	-0.0749111
CRHR1	-0.0744123
APPBP2	-0.0744077
CUEDC1	-0.074242
TRIM25	-0.0740821
SGSH	-0.073159
ETV4	-0.0729559
KRT19	-0.0728259
ABI3	-0.0724278
KRTAP1-4	-0.0711003
KRT9	-0.0710412
UNC13D	-0.0710371
CCL4L2	-0.0702631
MYO19	-0.0700826
CD300C	-0.0700402
GPRC5C	-0.0698195
METTL2A	-0.0694776
KCNJ16	-0.0692873
MRC2	-0.0687829
YPEL2	-0.0683525
WNT9B	-0.0676266
CHAD	-0.065908
MMD	-0.0658957
KRT13	-0.0657976
ZNF652	-0.0656074
CCDC47	-0.0647009
SRCIN1	-0.0643735
IGFBP4	-0.0643531
MAPT	-0.063956
RECQL5	-0.062934
TTLL6	-0.0627744
C17orf98	-0.0622622
LHX1	-0.0616823
CALCOCO2	-0.0616629
ITGA3	-0.0614442
ATP5H	-0.0607695
PRCD	-0.0605729
PDE6G	-0.0603221
SLC16A6	-0.0596047
GIT1	-0.0594628
ARL16	-0.0588003
DUSP14	-0.058768
UBALD2	-0.0580195
TAC4	-0.0576684
MLLT6	-0.0576548
SLC39A11	-0.0575458
TK1	-0.0573217
NFE2L1	-0.0567824
CCL7	-0.0561215
HOXB13	-0.0559546
DLX4	-0.0556659
ASIC2	-0.0554134
SPACA3	-0.0552001
DHRS11	-0.0539124
TMEM105	-0.0537705
NF1	-0.0524987
TAF15	-0.051689
SSTR2	-0.0506614
KRTAP29-1	-0.0505159
CCL13	-0.0503759
G6PC3	-0.0500651
TMC6	-0.0486251
LYRM9	-0.0486057
LGALS9	-0.0484473
DHRS13	-0.0474476
RUNDC1	-0.047059
CD300LF	-0.046378
TCAP	-0.0463733
CDR2L	-0.0463327
FAM222B	-0.0457777
TP53I13	-0.0455248
PIPOX	-0.0449056
FNDC8	-0.0445369
AP2B1	-0.0436861
MEOX1	-0.0430682
LLGL2	-0.0419391
CISD3	-0.0368858
KIF19	-0.0323065
SLFN12	-0.0316767
ITGB4	-0.0314375
KRT33B	-0.0310579
AXIN2	-0.0308762
UTS2R	-0.0306933
WIPF2	-0.0297348
CCL4	-0.0278213
SYNRG	-0.0258257
ANKFN1	-0.0255837
PRKAR1A	-0.0255723
KRTAP4-6	-0.0251309
RNFT1	-0.0249422
RPRML	-0.0237101
NKIRAS2	-0.0223803
KRT12	-0.021774
KRTAP4-9	-0.0217075
KCNJ2	-0.0212768
SPATA32	-0.0182663
SLFN12L	-0.0173004
DNAJC7	-0.0172735
C17orf102	-0.0165364
KRTAP3-3	-0.0124499
KIF2B	-0.0113125
TMEM99	-0.0111834
EME1	-0.0109715
CNTD1	-0.0106814
KRT20	-0.00932729
RPS6KB1	-0.00806563
KRT27	-0.00783155
CCR7	-0.00752622
HOXB1	-0.00636004
GGA3	-0.00555486
RNF157	-0.00520041
KRT222	-0.00510828
SLC4A1	-0.00414256
KRT15	-0.00397665
JUP	-0.00363628
GOSR1	-0.00204202
APOH	-0.000294314
RNF135	-0.000287786
PNMT	0.00131021
RAB34	0.00180616
CCL14	0.00402387
IFT20	0.0062483
KRTAP9-7	0.00642192
TIMP2	0.00725751
KRT35	0.0079017
NOG	0.00801198
DNAI2	0.00900683
KRT26	0.0105584
CEP95	0.0139232
SMIM6	0.0140367
TMC8	0.0143853
ACBD4	0.0151638
RFNG	0.0165131
NAGS	0.0170859
RUNDC3A	0.0172518
TRIM47	0.0179989
SCN4A	0.019382
KRT24	0.0195817
NEUROD2	0.0203948
TMEM98	0.0206621
FOXJ1	0.0228295
PIP4K2B	0.0235205
SEC14L1	0.0237848
SP6	0.0241911
CCL3L3	0.0242892
GRB7	0.0247805
CCL23	0.0254397
CBX4	0.0261839
C17orf67	0.0264394
KRTAP1-1	0.0271041
PITPNC1	0.027433
CCL3	0.0289864
KRTAP4-5	0.0292403
CCDC103	0.0299782
WIPI1	0.0323
FAM104A	0.0323165
KRT39	0.0330665
SPOP	0.0333165
C17orf112	0.0338325
CARD14	0.0355719
SOST	0.0362152
CSF3	0.0363013
KRTAP3-1	0.0363098
RNF213	0.0398838
PYY	0.04111
GALR2	0.0434627
PLXDC1	0.0450349
C1QL1	0.0458193
TMEM132E	0.0467524
C17orf47	0.0473775
CBX8	0.0474968
TNFAIP1	0.050039
RNF43	0.0562055
STXBP4	0.0577815
NOTUM	0.0583628
HCRT	0.0594887
KSR1	0.0609886
TMEM92	0.0617103
KRT34	0.061832
CD300LD	0.0627672
NEK8	0.0632151
TAOK1	0.0632469
KRTAP1-5	0.0637661
RGS9	0.0640038
WNT3	0.0660991
PRPSAP1	0.066758
ARL17A	0.0671029
GH1	0.0688067
HOXB4	0.0778877
C17orf80	0.080913
SNX11	0.0811277
CD300A	0.084242
KRTAP9-1	0.0866198
AKAP1	0.0878361
TANC2	0.0885931
GHDC	0.0929483
SLFN5	0.0938744
KRTAP3-2	0.0943366
ICAM2	0.0974703
CACNG5	0.0975238
GRIN2C	0.0981934
CCL18	0.0987567
KRTAP16-1	0.099762
CCL2	0.103527
PEX12	0.10377
LYZL6	0.10572
KRT14	0.105919
EVI2B	0.107849
CDK5R1	0.107946
STAC2	0.112789
SLFN11	0.112928
EVPL	0.118246
GCGR	0.123104
DYNLL2	0.124601
KRT40	0.126337
WDR45B	0.126506
ABCA6	0.127785
STAT3	0.129188
C17orf78	0.129667
FBXL20	0.133169
B3GALNT2	0.137309
MYADML2	0.139626
ABCA9	0.14579
RARA	0.146095
QRICH2	0.154509
AMZ2	0.159033
SLC6A4	0.16334
KRTAP9-3	0.166996
HOXB2	0.175385
CCL8	0.183408
C17orf64	0.184353
KRT37	0.184614
TNS4	0.187122
PLEKHH3	0.188804
OTOP3	0.1973
TMEM100	0.210093
ABCA10	0.21654
MGAT5B	0.217822
CSH1	0.219228
KRT38	0.22556
ANKRD13B	0.232006
B3GALNT1	0.235868
CCL11	0.242128
KRTAP2-2	0.248777
KRT36	0.258991
CCL15	0.261266
SLFN14	0.272514
NLK	0.289148
ARSG	0.362395
KRTAP4-12	0.375958
TBC1D3	2.08241

## Sheet: Figure 1B
#node1	node2
AATF	UTP18
AATF	DDX5
AATF	MRPS7
AATF	UTP6
AATF	DHX8
AATF	EIF4A3
AATF	GPS1
AATF	EFTUD2
AATF	FTSJ3
AATF	SUMO2
AATF	NLE1
AATF	BRCA1
AATF	ALYREF
AATF	CDC27
AATF	TBC1D3G
AATF	DDX42
AATF	PSMB3
AATF	TBC1D3H
AATF	ZNHIT3
AATF	TADA2A
AATF	DDX52
ALYREF	UTP18
ALYREF	RPL19
ALYREF	SUPT4H1
ALYREF	DDX5
ALYREF	MRPL27
ALYREF	DHX8
ALYREF	EIF4A3
ALYREF	KPNB1
ALYREF	PSMC5
ALYREF	SUPT6H
ALYREF	MRPS23
ALYREF	MRPL12
ALYREF	SRSF2
ALYREF	CBX1
ALYREF	RPL23A
ALYREF	EFTUD2
ALYREF	TOP2A
ALYREF	NLE1
ALYREF	BRCA1
ALYREF	USP36
ALYREF	TADA2A
ALYREF	AATF
ALYREF	LSM12
ALYREF	PSMB3
ALYREF	DDX42
ALYREF	RPL27
ALYREF	PHB
ALYREF	LUC7L3
ANAPC11	CDC6
ANAPC11	MRPL27
ANAPC11	TUBG1
ANAPC11	RPL38
ANAPC11	MRPS23
ANAPC11	UBE2O
ANAPC11	PHF12
ANAPC11	NPLOC4
ANAPC11	PSMB3
ANAPC11	RPL27
ANAPC11	RPL23
ANAPC11	EIF1
ANAPC11	ATP5G1
ANAPC11	NDUFA8
ANAPC11	SUMO2
ANAPC11	SLC25A10
ANAPC11	GPS1
ANAPC11	BRCA1
ANAPC11	CDC27
ARL4D	CDC6
ARL4D	RPL19
ARL4D	GOSR2
ARL4D	TUBG1
ARL4D	DHX8
ARL4D	EPN3
ARL4D	TUBD1
ARL4D	TBC1D3B
ARL4D	TBC1D3G
ARL4D	TBC1D3H
ARL4D	NMT1
ARL4D	EXOC7
ARL4D	SUMO2
ARL4D	CLTC
ARMC7	MRPS7
ARMC7	VMP1
ARMC7	GRB2
ARMC7	PHB
ARMC7	TEN1
ARMC7	SUMO2
ARMC7	SLC16A5
ARMC7	LUC7L3
ARMC7	INTS2
ATP5G1	RPL19
ATP5G1	MRPL27
ATP5G1	SLC35B1
ATP5G1	MRPS7
ATP5G1	TMEM199
ATP5G1	COX11
ATP5G1	MRPL38
ATP5G1	RPL38
ATP5G1	PSMC5
ATP5G1	MRPS23
ATP5G1	MRPL12
ATP5G1	ANAPC11
ATP5G1	NDUFA8
ATP5G1	GPS1
ATP5G1	MRPL45
ATP5G1	TOP2A
ATP5G1	RPL27
ATP5G1	EFTUD2
ATP5G1	RPL23
ATP5G1	RPL23A
ATP5G1	PSMB3
ATP5G1	PHB
ATP5G1	SNF8
BIRC5	CDC6
BIRC5	TUBG1
BIRC5	VPS25
BIRC5	BRIP1
BIRC5	MED1
BIRC5	KLHL11
BIRC5	NPEPPS
BIRC5	JMJD6
BIRC5	MRPL45
BIRC5	PSMC5
BIRC5	STAT5A
BIRC5	CBX1
BIRC5	BRCA1
BIRC5	SUMO2
BIRC5	TOP2A
BRCA1	CDC6
BRCA1	DDX5
BRCA1	TUBG1
BRCA1	BRIP1
BRCA1	DHX8
BRCA1	KPNB1
BRCA1	COX11
BRCA1	MED1
BRCA1	BIRC5
BRCA1	UBTF
BRCA1	RPTOR
BRCA1	UBE2O
BRCA1	SMARCE1
BRCA1	NPLOC4
BRCA1	RAD51C
BRCA1	STAT5A
BRCA1	ANAPC11
BRCA1	SRSF2
BRCA1	GRB2
BRCA1	CBX1
BRCA1	ZNF207
BRCA1	TEN1
BRCA1	SUMO2
BRCA1	TOP2A
BRCA1	ALYREF
BRCA1	USP36
BRCA1	PHB
BRCA1	AATF
BRCA1	DDX42
BRCA1	RAD51D
BRCA1	CDC27
BRIP1	CDC6
BRIP1	TUBG1
BRIP1	CDC27
BRIP1	DDX52
BRIP1	DDX42
BRIP1	TUBD1
BRIP1	BIRC5
BRIP1	FDXR
BRIP1	TOP2A
BRIP1	MRPL12
BRIP1	RAD51D
BRIP1	RAD51C
BRIP1	BRCA1
C17orf58	KANSL1
C17orf58	LRRC37A3
C17orf82	ZNHIT3
CBX1	CDC6
CBX1	EIF4A3
CBX1	KPNB1
CBX1	BIRC5
CBX1	UBTF
CBX1	SUPT6H
CBX1	SMARCE1
CBX1	RAD51C
CBX1	STAT5A
CBX1	SRSF2
CBX1	LSM12
CBX1	RPL23A
CBX1	RAD51D
CBX1	USP36
CBX1	ZNF207
CBX1	ALYREF
CBX1	TOP2A
CBX1	SUMO2
CBX1	BRCA1
CDC27	CDC6
CDC27	RPL19
CDC27	GOSR2
CDC27	DDX5
CDC27	TUBG1
CDC27	BRIP1
CDC27	UTP6
CDC27	DHX8
CDC27	EPN3
CDC27	UBTF
CDC27	PSMC5
CDC27	SRP68
CDC27	SUPT6H
CDC27	UBE2O
CDC27	RAD51C
CDC27	ANAPC11
CDC27	SRSF2
CDC27	RPL23A
CDC27	SUMO2
CDC27	TOP2A
CDC27	INTS2
CDC27	BRCA1
CDC27	RPL23
CDC27	TADA2A
CDC27	LRRC37A3
CDC27	AATF
CDC27	CLTC
CDC27	SAP30BP
CDC27	USP36
CDC27	DDX52
CDC6	UTP6
CDC6	UBTF
CDC6	KPNB1
CDC6	TUBD1
CDC6	SUMO2
CDC6	SLC25A10
CDC6	RAD51D
CDC6	PHB
CDC6	ARL4D
CDC6	LUC7L3
CDC6	RAC3
CDC6	RPL23
CDC6	TUBG1
CDC6	COASY
CDC6	BRIP1
CDC6	RAD51C
CDC6	CBX1
CDC6	DDX5
CDC6	BRCA1
CDC6	BIRC5
CDC6	TOP2A
CDC6	PSMC5
CDC6	PSMB3
CDC6	ANAPC11
CDC6	CDC27
CEP131	MRPL12
CHMP6	VPS25
CHMP6	KANSL1
CHMP6	PPM1E
CHMP6	EXOC7
CHMP6	NMT1
CHMP6	EFTUD2
CHMP6	CLTC
CHMP6	GPS1
CHMP6	NPLOC4
CHMP6	HGS
CHMP6	SNF8
CLTC	GOSR2
CLTC	DDX5
CLTC	VPS25
CLTC	VMP1
CLTC	KANSL1
CLTC	EPN3
CLTC	KPNB1
CLTC	COG1
CLTC	RAC3
CLTC	RPTOR
CLTC	CHMP6
CLTC	SUPT6H
CLTC	NPEPPS
CLTC	TUBD1
CLTC	ARL4D
CLTC	HGS
CLTC	EXOC7
CLTC	GRB2
CLTC	EFTUD2
CLTC	SUMO2
CLTC	INTS2
CLTC	LUC7L3
CLTC	CDC27
CLTC	DDX42
CLTC	RPL27
CLTC	PHB
COASY	CDC6
COASY	GOSR2
COASY	MRPL27
COASY	MRPS7
COASY	ERAL1
COASY	DHX8
COASY	NPEPPS
COASY	MRPL12
COASY	RPL23A
COASY	EFTUD2
COASY	FTSJ3
COASY	FDXR
COASY	SNF8
COASY	SLC25A10
COASY	NMT1
COASY	PSMB3
COG1	GOSR2
COG1	ERAL1
COG1	KPNB1
COG1	CLTC
COG1	EXOC7
COX11	SLC35B1
COX11	BRCA1
COX11	FDXR
COX11	NDUFA8
COX11	ATP5G1
CSH2	STAT5A
CSH2	GRB2
DDX42	UTP18
DDX42	RPL19
DDX42	DDX5
DDX42	BRIP1
DDX42	UTP6
DDX42	DHX8
DDX42	EIF4A3
DDX42	UBTF
DDX42	RPTOR
DDX42	RPL38
DDX42	PSMC5
DDX42	SUPT6H
DDX42	SRSF2
DDX42	RPL23A
DDX42	EFTUD2
DDX42	FTSJ3
DDX42	SUMO2
DDX42	TOP2A
DDX42	NLE1
DDX42	BRCA1
DDX42	RPL23
DDX42	ALYREF
DDX42	LUC7L3
DDX42	CLTC
DDX42	LSM12
DDX42	RPL27
DDX42	AATF
DDX42	DDX52
DDX5	CDC6
DDX5	UTP18
DDX5	RPL19
DDX5	LRRC37A3
DDX5	MRPL27
DDX5	ERAL1
DDX5	MRPS7
DDX5	SUPT6H
DDX5	UBTF
DDX5	ZNF207
DDX5	RPL38
DDX5	POLG2
DDX5	GRB2
DDX5	EIF1
DDX5	SMARCE1
DDX5	RPTOR
DDX5	CDC27
DDX5	EPN3
DDX5	LSM12
DDX5	VMP1
DDX5	RPL27
DDX5	KPNB1
DDX5	PSMC5
DDX5	TOP2A
DDX5	DDX42
DDX5	RPL23
DDX5	MRPL12
DDX5	RPL23A
DDX5	PSMB3
DDX5	TEN1
DDX5	JMJD6
DDX5	SRP68
DDX5	PHB
DDX5	UBE2O
DDX5	CLTC
DDX5	TADA2A
DDX5	BRCA1
DDX5	LUC7L3
DDX5	AATF
DDX5	UTP6
DDX5	EFTUD2
DDX5	NLE1
DDX5	FTSJ3
DDX5	ALYREF
DDX5	EIF4A3
DDX5	DDX52
DDX5	DHX8
DDX5	SRSF2
DDX5	SUMO2
DDX52	UTP18
DDX52	DDX5
DDX52	BRIP1
DDX52	UTP6
DDX52	DHX8
DDX52	EIF4A3
DDX52	RPL23A
DDX52	FTSJ3
DDX52	TOP2A
DDX52	NLE1
DDX52	CDC27
DDX52	TBC1D3G
DDX52	DDX42
DDX52	RAD51D
DDX52	AATF
DDX52	PSMB3
DDX52	TBC1D3H
DDX52	MRPL45
DDX52	ZNHIT3
DDX52	TADA2A
DHX8	UTP18
DHX8	DDX5
DHX8	MRPS7
DHX8	TUBG1
DHX8	UTP6
DHX8	ARL4D
DHX8	SUMO2
DHX8	MED1
DHX8	UBTF
DHX8	USP36
DHX8	LUC7L3
DHX8	CDC27
DHX8	TOP2A
DHX8	COASY
DHX8	BRCA1
DHX8	SMG8
DHX8	JMJD6
DHX8	AATF
DHX8	EIF1
DHX8	KANSL1
DHX8	SUPT6H
DHX8	ALYREF
DHX8	NLE1
DHX8	FTSJ3
DHX8	SRSF2
DHX8	DDX42
DHX8	DDX52
DHX8	SAP30BP
DHX8	EIF4A3
DHX8	EFTUD2
EFTUD2	UTP18
EFTUD2	RPL19
EFTUD2	DDX5
EFTUD2	MRPL27
EFTUD2	MRPS7
EFTUD2	TUBG1
EFTUD2	UTP6
EFTUD2	DHX8
EFTUD2	EIF4A3
EFTUD2	KPNB1
EFTUD2	UBTF
EFTUD2	RPTOR
EFTUD2	MRPL38
EFTUD2	RPL38
EFTUD2	PSMC5
EFTUD2	SRP68
EFTUD2	KLHL11
EFTUD2	CHMP6
EFTUD2	SUPT6H
EFTUD2	MRPS23
EFTUD2	TUBD1
EFTUD2	UBE2O
EFTUD2	SMARCE1
EFTUD2	NPLOC4
EFTUD2	MRPL12
EFTUD2	RAD51C
EFTUD2	ZNF830
EFTUD2	GPS1
EFTUD2	SRSF2
EFTUD2	ATP5G1
EFTUD2	RPL23A
EFTUD2	SLC25A10
EFTUD2	RAD51D
EFTUD2	USP36
EFTUD2	CLTC
EFTUD2	LRRC37A3
EFTUD2	SUMO2
EFTUD2	COASY
EFTUD2	SNF8
EFTUD2	LSM12
EFTUD2	JMJD6
EFTUD2	AATF
EFTUD2	EIF1
EFTUD2	NLE1
EFTUD2	POLG2
EFTUD2	FTSJ3
EFTUD2	PSMB3
EFTUD2	TOP2A
EFTUD2	DDX42
EFTUD2	NMT1
EFTUD2	PHB
EFTUD2	RPL27
EFTUD2	LUC7L3
EFTUD2	ALYREF
EFTUD2	RPL23
EIF1	RPL19
EIF1	DDX5
EIF1	MRPS7
EIF1	ERAL1
EIF1	DHX8
EIF1	EIF4A3
EIF1	UBTF
EIF1	RPTOR
EIF1	RPL38
EIF1	PSMC5
EIF1	KLHL11
EIF1	TUBD1
EIF1	SMARCE1
EIF1	ANAPC11
EIF1	SRSF2
EIF1	RPL23A
EIF1	EFTUD2
EIF1	SUMO2
EIF1	LSM12
EIF1	NMT1
EIF1	SMG8
EIF1	PSMB3
EIF1	RPL23
EIF1	RPL27
EIF4A3	UTP18
EIF4A3	RPL19
EIF4A3	DDX5
EIF4A3	MRPS7
EIF4A3	TUBG1
EIF4A3	UTP6
EIF4A3	DHX8
EIF4A3	PGS1
EIF4A3	ZNF207
EIF4A3	LUC7L3
EIF4A3	SUMO2
EIF4A3	CBX1
EIF4A3	KRT10
EIF4A3	SUPT6H
EIF4A3	USP36
EIF4A3	MRPL12
EIF4A3	DDX42
EIF4A3	PSMC5
EIF4A3	NPLOC4
EIF4A3	RPTOR
EIF4A3	KPNB1
EIF4A3	RPL38
EIF4A3	LSM12
EIF4A3	SRP68
EIF4A3	RPL23
EIF4A3	PHB
EIF4A3	RPL27
EIF4A3	PSMB3
EIF4A3	RPL23A
EIF4A3	SMG8
EIF4A3	EIF1
EIF4A3	NLE1
EIF4A3	FTSJ3
EIF4A3	AATF
EIF4A3	DDX52
EIF4A3	SRSF2
EIF4A3	EFTUD2
EIF4A3	ALYREF
EPN3	DDX5
EPN3	RPTOR
EPN3	EXOC7
EPN3	PSMC5
EPN3	CDC27
EPN3	TEN1
EPN3	ARL4D
EPN3	RAC3
EPN3	INTS2
EPN3	HGS
EPN3	CLTC
ERAL1	DDX5
ERAL1	MRPL27
ERAL1	MRPS7
ERAL1	VPS25
ERAL1	PGS1
ERAL1	COG1
ERAL1	TOP2A
ERAL1	SUPT6H
ERAL1	RPL23
ERAL1	POLG2
ERAL1	COASY
ERAL1	FTSJ3
ERAL1	EIF1
ERAL1	MRPL45
ERAL1	PHB
ERAL1	SLC25A10
ERAL1	MRPL12
ERAL1	MRPS23
EXOC7	GOSR2
EXOC7	PGS1
EXOC7	EPN3
EXOC7	COG1
EXOC7	RAC3
EXOC7	PSMC5
EXOC7	CHMP6
EXOC7	ARL4D
EXOC7	HGS
EXOC7	NDUFA8
EXOC7	CLTC
FDXR	MRPL27
FDXR	BRIP1
FDXR	COX11
FDXR	MRPL38
FDXR	RAD51C
FDXR	TOP2A
FDXR	RAD51D
FDXR	COASY
FDXR	SLC25A10
FDXR	PHB
FTSJ3	UTP18
FTSJ3	RPL19
FTSJ3	DDX5
FTSJ3	MRPL27
FTSJ3	MRPS7
FTSJ3	ERAL1
FTSJ3	UTP6
FTSJ3	DHX8
FTSJ3	EIF4A3
FTSJ3	KPNB1
FTSJ3	UBTF
FTSJ3	RPL38
FTSJ3	PSMC5
FTSJ3	SRP68
FTSJ3	SUPT6H
FTSJ3	UBE2O
FTSJ3	SMARCE1
FTSJ3	MRPL12
FTSJ3	RPL23A
FTSJ3	EFTUD2
FTSJ3	POLG2
FTSJ3	COASY
FTSJ3	USP36
FTSJ3	DDX42
FTSJ3	RPL23
FTSJ3	RPL27
FTSJ3	NLE1
FTSJ3	AATF
FTSJ3	DDX52
GOSR2	SUPT4H1
GOSR2	COASY
GOSR2	CLTC
GOSR2	ARL4D
GOSR2	SUMO2
GOSR2	INTS2
GOSR2	CDC27
GOSR2	PHB
GOSR2	PSMB3
GOSR2	LSM12
GOSR2	EXOC7
GOSR2	COG1
GPS1	TUBG1
GPS1	MRPL38
GPS1	PSMC5
GPS1	CHMP6
GPS1	HGS
GPS1	NPLOC4
GPS1	MRPL12
GPS1	ANAPC11
GPS1	USP36
GPS1	RPL23A
GPS1	PSMB3
GPS1	AATF
GPS1	TOP2A
GPS1	PHB
GPS1	EFTUD2
GPS1	ATP5G1
GPS1	GRB2
GRB2	DDX5
GRB2	ARMC7
GRB2	KRT10
GRB2	UBTF
GRB2	RAC3
GRB2	RPTOR
GRB2	HGS
GRB2	STAT5A
GRB2	GPS1
GRB2	PHB
GRB2	CSH2
GRB2	BRCA1
GRB2	CLTC
GSDMA	KRTAP4-2
GSDMA	PSMC5
HGS	VPS25
HGS	VMP1
HGS	EPN3
HGS	RAC3
HGS	CHMP6
HGS	GPS1
HGS	TADA2A
HGS	EXOC7
HGS	POLG2
HGS	SUMO2
HGS	STAT5A
HGS	MRPL12
HGS	NPLOC4
HGS	GRB2
HGS	CLTC
HGS	SNF8
INTS2	SUPT4H1
INTS2	GOSR2
INTS2	ARMC7
INTS2	VMP1
INTS2	EPN3
INTS2	MRPS23
INTS2	TUBD1
INTS2	TEN1
INTS2	CDC27
INTS2	CLTC
INTS2	POLG2
JMJD6	UTP18
JMJD6	DDX5
JMJD6	DHX8
JMJD6	BIRC5
JMJD6	RAC3
JMJD6	SMARCE1
JMJD6	SRSF2
JMJD6	EFTUD2
JMJD6	USP36
JMJD6	SMG8
JMJD6	LUC7L3
JMJD6	METTL23
KANSL1	DHX8
KANSL1	LUC7L3
KANSL1	CLTC
KANSL1	C17orf58
KANSL1	LRRC37B
KANSL1	PPM1E
KANSL1	TSEN54
KANSL1	TOP2A
KANSL1	LRRC37A3
KANSL1	CHMP6
KLHL11	VPS25
KLHL11	BIRC5
KLHL11	EIF1
KLHL11	NMT1
KLHL11	EFTUD2
KLHL11	PSMB3
KLHL11	UBE2O
KLHL11	LSM12
KPNB1	CDC6
KPNB1	UTP18
KPNB1	RPL19
KPNB1	SUPT4H1
KPNB1	DDX5
KPNB1	MRPS7
KPNB1	UTP6
KPNB1	EIF4A3
KPNB1	SRSF2
KPNB1	LSM12
KPNB1	COG1
KPNB1	BRCA1
KPNB1	FTSJ3
KPNB1	TBC1D3H
KPNB1	TBC1D3G
KPNB1	TBC1D3B
KPNB1	RPL38
KPNB1	ALYREF
KPNB1	PHF12
KPNB1	ZNF207
KPNB1	PHB
KPNB1	TOP2A
KPNB1	RAC3
KPNB1	PSMB3
KPNB1	CBX1
KPNB1	SUMO2
KPNB1	RPL23A
KPNB1	CLTC
KPNB1	RPL23
KPNB1	EFTUD2
KPNB1	PSMC5
KPNB1	RPL27
KRT10	EIF4A3
KRT10	SUMO2
KRT10	GRB2
KRT10	SLC16A5
KRT10	PHB
KRT10	TOP2A
KRTAP4-2	GSDMA
KRTAP4-2	SLC25A10
LRRC37A3	DDX5
LRRC37A3	MRPL27
LRRC37A3	KANSL1
LRRC37A3	MRPL12
LRRC37A3	EFTUD2
LRRC37A3	C17orf58
LRRC37A3	RPL23
LRRC37A3	LUC7L3
LRRC37A3	CDC27
LRRC37A3	TBC1D3G
LRRC37A3	TBC1D3B
LRRC37A3	TBC1D3H
LRRC37B	UTP6
LRRC37B	KANSL1
LRRC37B	ZNF207
LSM12	RPL19
LSM12	SUPT4H1
LSM12	GOSR2
LSM12	DDX5
LSM12	VPS25
LSM12	EIF4A3
LSM12	KPNB1
LSM12	KLHL11
LSM12	SMARCE1
LSM12	CBX1
LSM12	EFTUD2
LSM12	EIF1
LSM12	ALYREF
LSM12	DDX42
LSM12	RPL27
LSM12	NMT1
LSM12	PHB
LSM12	PSMB3
LUC7L3	CDC6
LUC7L3	DDX5
LUC7L3	ARMC7
LUC7L3	DHX8
LUC7L3	KANSL1
LUC7L3	EIF4A3
LUC7L3	SRSF2
LUC7L3	ZNF207
LUC7L3	TEN1
LUC7L3	EFTUD2
LUC7L3	JMJD6
LUC7L3	RPL23
LUC7L3	ALYREF
LUC7L3	SAP30BP
LUC7L3	METTL23
LUC7L3	POLG2
LUC7L3	LRRC37A3
LUC7L3	TADA2A
LUC7L3	PHB
LUC7L3	RPL27
LUC7L3	CLTC
LUC7L3	DDX42
MED1	DHX8
MED1	SAP30BP
MED1	TOP2A
MED1	SRSF2
MED1	SMARCE1
MED1	TADA2A
MED1	PSMC5
MED1	SUPT6H
MED1	BIRC5
MED1	BRCA1
METTL23	MRPL38
METTL23	UBE2O
METTL23	TSEN54
METTL23	SRSF2
METTL23	JMJD6
METTL23	LUC7L3
MRPL10	MRPL27
MRPL10	MRPS7
MRPL10	RPTOR
MRPL10	MRPS23
MRPL10	MRPL38
MRPL10	MRPL45
MRPL10	MRPL12
MRPL12	RPL19
MRPL12	DDX5
MRPL12	MRPL27
MRPL12	MRPS7
MRPL12	TUBG1
MRPL12	ERAL1
MRPL12	BRIP1
MRPL12	EIF4A3
MRPL12	MRPL10
MRPL12	MRPL38
MRPL12	RPL38
MRPL12	PSMC5
MRPL12	MRPS23
MRPL12	HGS
MRPL12	NPLOC4
MRPL12	POLG2
MRPL12	PPY
MRPL12	ALYREF
MRPL12	LRRC37A3
MRPL12	FTSJ3
MRPL12	CEP131
MRPL12	NDUFA8
MRPL12	RPL27
MRPL12	NMT1
MRPL12	COASY
MRPL12	PSMB3
MRPL12	SLC25A10
MRPL12	ATP5G1
MRPL12	GPS1
MRPL12	PHB
MRPL12	EFTUD2
MRPL12	RPL23A
MRPL12	RPL23
MRPL12	MRPL45
MRPL27	DDX5
MRPL27	ALYREF
MRPL27	FTSJ3
MRPL27	LRRC37A3
MRPL27	SLC35B1
MRPL27	ANAPC11
MRPL27	FDXR
MRPL27	ERAL1
MRPL27	PHB
MRPL27	RAD51C
MRPL27	RAD51D
MRPL27	TOP2A
MRPL27	SNF8
MRPL27	PSMC5
MRPL27	PSMB3
MRPL27	COASY
MRPL27	ATP5G1
MRPL27	RPL27
MRPL27	EFTUD2
MRPL27	NDUFA8
MRPL27	MRPS23
MRPL27	RPL23A
MRPL27	RPL23
MRPL27	MRPL45
MRPL27	MRPL10
MRPL27	MRPS7
MRPL27	MRPL38
MRPL27	MRPL12
MRPL38	MRPL27
MRPL38	MRPS7
MRPL38	MRPL10
MRPL38	EFTUD2
MRPL38	METTL23
MRPL38	UBE2O
MRPL38	SUMO2
MRPL38	GPS1
MRPL38	NMT1
MRPL38	ATP5G1
MRPL38	RPL38
MRPL38	NDUFA8
MRPL38	FDXR
MRPL38	SLC25A10
MRPL38	RPL23
MRPL38	MRPS23
MRPL38	MRPL12
MRPL38	MRPL45
MRPL45	MRPL27
MRPL45	MRPS7
MRPL45	ERAL1
MRPL45	MRPL10
MRPL45	BIRC5
MRPL45	MRPL38
MRPL45	PSMC5
MRPL45	MRPS23
MRPL45	NPEPPS
MRPL45	MRPL12
MRPL45	NDUFA8
MRPL45	ATP5G1
MRPL45	POLG2
MRPL45	PHB
MRPL45	DDX52
MRPL45	TADA2A
MRPL45	PSMB3
MRPS23	UTP18
MRPS23	RPL19
MRPS23	SUPT4H1
MRPS23	MRPL27
MRPS23	MRPS7
MRPS23	ERAL1
MRPS23	MRPL10
MRPS23	MRPL38
MRPS23	PSMC5
MRPS23	ANAPC11
MRPS23	NDUFA8
MRPS23	ALYREF
MRPS23	RAD51C
MRPS23	SLC25A10
MRPS23	ATP5G1
MRPS23	EFTUD2
MRPS23	INTS2
MRPS23	MRPL45
MRPS23	MRPL12
MRPS7	UTP18
MRPS7	RPL19
MRPS7	DDX5
MRPS7	MRPL27
MRPS7	FTSJ3
MRPS7	ARMC7
MRPS7	DHX8
MRPS7	SNF8
MRPS7	SUMO2
MRPS7	RAD51C
MRPS7	NMT1
MRPS7	COASY
MRPS7	EIF4A3
MRPS7	SLC25A10
MRPS7	KPNB1
MRPS7	TUBG1
MRPS7	SLC16A5
MRPS7	NDUFA8
MRPS7	TOP2A
MRPS7	PSMB3
MRPS7	ATP5G1
MRPS7	POLG2
MRPS7	PHB
MRPS7	EIF1
MRPS7	PSMC5
MRPS7	AATF
MRPS7	EFTUD2
MRPS7	UTP6
MRPS7	MRPL10
MRPS7	MRPL45
MRPS7	ERAL1
MRPS7	MRPL38
MRPS7	RPL38
MRPS7	RPL27
MRPS7	RPL23
MRPS7	RPL23A
MRPS7	MRPS23
MRPS7	MRPL12
NDUFA8	MRPL27
NDUFA8	MRPS7
NDUFA8	TMEM199
NDUFA8	COX11
NDUFA8	MRPL38
NDUFA8	MRPS23
NDUFA8	MRPL12
NDUFA8	EXOC7
NDUFA8	ANAPC11
NDUFA8	PSMB3
NDUFA8	MRPL45
NDUFA8	SLC25A10
NDUFA8	PHB
NDUFA8	ATP5G1
NLE1	UTP18
NLE1	RPL19
NLE1	DDX5
NLE1	UTP6
NLE1	DHX8
NLE1	EIF4A3
NLE1	UBTF
NLE1	RPTOR
NLE1	RPL38
NLE1	RPL23A
NLE1	EFTUD2
NLE1	FTSJ3
NLE1	ALYREF
NLE1	DDX42
NLE1	RPL23
NLE1	RPL27
NLE1	DDX52
NLE1	AATF
NMT1	RPL19
NMT1	MRPS7
NMT1	VPS25
NMT1	MRPL38
NMT1	RPL38
NMT1	SRP68
NMT1	KLHL11
NMT1	CHMP6
NMT1	ARL4D
NMT1	MRPL12
NMT1	RAD51C
NMT1	RPL23A
NMT1	EFTUD2
NMT1	EIF1
NMT1	COASY
NMT1	LSM12
NPEPPS	RPL19
NPEPPS	BIRC5
NPEPPS	RPTOR
NPEPPS	RPL38
NPEPPS	PPM1E
NPEPPS	SLC16A5
NPEPPS	CLTC
NPEPPS	COASY
NPEPPS	RPL23A
NPEPPS	PHB
NPEPPS	MRPL45
NPLOC4	VPS25
NPLOC4	EIF4A3
NPLOC4	PSMC5
NPLOC4	CHMP6
NPLOC4	HGS
NPLOC4	GPS1
NPLOC4	MRPL12
NPLOC4	BRCA1
NPLOC4	ANAPC11
NPLOC4	SNF8
NPLOC4	EFTUD2
NPLOC4	SUMO2
PGS1	ERAL1
PGS1	EIF4A3
PGS1	SLC25A10
PGS1	EXOC7
PHB	CDC6
PHB	RPL19
PHB	GOSR2
PHB	DDX5
PHB	MRPL27
PHB	SLC35B1
PHB	MRPS7
PHB	ARMC7
PHB	TUBG1
PHB	ERAL1
PHB	EIF4A3
PHB	KRT10
PHB	KPNB1
PHB	UBTF
PHB	RPL38
PHB	PSMC5
PHB	NPEPPS
PHB	MRPL12
PHB	NDUFA8
PHB	GPS1
PHB	SRSF2
PHB	GRB2
PHB	ATP5G1
PHB	RPL23A
PHB	EFTUD2
PHB	FDXR
PHB	BRCA1
PHB	RPL23
PHB	SNF8
PHB	ALYREF
PHB	LUC7L3
PHB	SMG8
PHB	POLG2
PHB	SLC25A10
PHB	SAP30BP
PHB	RPL27
PHB	LSM12
PHB	PSMB3
PHB	MRPL45
PHB	CLTC
PHF12	KPNB1
PHF12	UBTF
PHF12	SUPT6H
PHF12	UBE2O
PHF12	SMARCE1
PHF12	SUMO2
PHF12	TADA2A
PHF12	ANAPC11
POLG2	UTP18
POLG2	DDX5
POLG2	MRPS7
POLG2	ERAL1
POLG2	UTP6
POLG2	RPL38
POLG2	PPM1E
POLG2	TUBD1
POLG2	HGS
POLG2	MRPL12
POLG2	EFTUD2
POLG2	FTSJ3
POLG2	TOP2A
POLG2	INTS2
POLG2	LUC7L3
POLG2	MRPL45
POLG2	PHB
PPM1E	KANSL1
PPM1E	POLG2
PPM1E	NPEPPS
PPM1E	TOP2A
PPM1E	RAD51C
PPM1E	ZNF207
PPM1E	ZNF830
PPM1E	CHMP6
PPM1E	TUBD1
PPY	MRPL12
PPY	TOP2A
PSMB3	CDC6
PSMB3	RPL19
PSMB3	SUPT4H1
PSMB3	GOSR2
PSMB3	DDX5
PSMB3	MRPL27
PSMB3	SLC35B1
PSMB3	MRPS7
PSMB3	TUBG1
PSMB3	VPS25
PSMB3	EIF4A3
PSMB3	KPNB1
PSMB3	TMEM199
PSMB3	PSMC5
PSMB3	SRP68
PSMB3	KLHL11
PSMB3	MRPL12
PSMB3	STAT5A
PSMB3	ANAPC11
PSMB3	NDUFA8
PSMB3	GPS1
PSMB3	ATP5G1
PSMB3	RPL23A
PSMB3	EFTUD2
PSMB3	SUMO2
PSMB3	TOP2A
PSMB3	EIF1
PSMB3	RPL23
PSMB3	SNF8
PSMB3	ALYREF
PSMB3	RPL27
PSMB3	COASY
PSMB3	RAD51D
PSMB3	LSM12
PSMB3	AATF
PSMB3	PHB
PSMB3	DDX52
PSMB3	MRPL45
PSMC5	CDC6
PSMC5	UTP18
PSMC5	RPL19
PSMC5	SUPT4H1
PSMC5	DDX5
PSMC5	MRPL27
PSMC5	SLC35B1
PSMC5	MRPS7
PSMC5	TUBG1
PSMC5	UTP6
PSMC5	EPN3
PSMC5	EIF4A3
PSMC5	KPNB1
PSMC5	MED1
PSMC5	BIRC5
PSMC5	GSDMA
PSMC5	RPL38
PSMC5	EIF1
PSMC5	ATP5G1
PSMC5	TUBD1
PSMC5	MRPL45
PSMC5	CDC27
PSMC5	RAD51C
PSMC5	FTSJ3
PSMC5	EFTUD2
PSMC5	EXOC7
PSMC5	MRPS23
PSMC5	SUMO2
PSMC5	SNF8
PSMC5	DDX42
PSMC5	ALYREF
PSMC5	TOP2A
PSMC5	GPS1
PSMC5	NPLOC4
PSMC5	MRPL12
PSMC5	SRP68
PSMC5	PHB
PSMC5	RPL27
PSMC5	RPL23A
PSMC5	RPL23
PSMC5	PSMB3
RAC3	CDC6
RAC3	TUBG1
RAC3	EPN3
RAC3	KPNB1
RAC3	TBC1D3G
RAC3	TBC1D3B
RAC3	TBC1D3H
RAC3	SUMO2
RAC3	STAT5A
RAC3	HGS
RAC3	TUBD1
RAC3	SLC25A10
RAC3	RPTOR
RAC3	JMJD6
RAC3	CLTC
RAC3	GRB2
RAC3	EXOC7
RAD51C	CDC6
RAD51C	UTP18
RAD51C	MRPL27
RAD51C	MRPS7
RAD51C	TUBG1
RAD51C	BRIP1
RAD51C	PSMC5
RAD51C	PPM1E
RAD51C	SUPT6H
RAD51C	MRPS23
RAD51C	TUBD1
RAD51C	UBE2O
RAD51C	EFTUD2
RAD51C	CBX1
RAD51C	RPL23A
RAD51C	FDXR
RAD51C	SMG8
RAD51C	RPL23
RAD51C	CDC27
RAD51C	NMT1
RAD51C	SUMO2
RAD51C	TOP2A
RAD51C	BRCA1
RAD51C	RAD51D
RAD51D	CDC6
RAD51D	MRPL27
RAD51D	TUBG1
RAD51D	BRIP1
RAD51D	TUBD1
RAD51D	UBE2O
RAD51D	RAD51C
RAD51D	CBX1
RAD51D	RPL23A
RAD51D	EFTUD2
RAD51D	SUMO2
RAD51D	TOP2A
RAD51D	FDXR
RAD51D	BRCA1
RAD51D	RPL23
RAD51D	DDX52
RAD51D	PSMB3
RPL19	UTP18
RPL19	NPEPPS
RPL19	TUBG1
RPL19	TUBD1
RPL19	MRPS23
RPL19	LSM12
RPL19	CDC27
RPL19	ARL4D
RPL19	DDX42
RPL19	SUMO2
RPL19	NMT1
RPL19	ALYREF
RPL19	ATP5G1
RPL19	PHB
RPL19	MRPL12
RPL19	PSMB3
RPL19	NLE1
RPL19	FTSJ3
RPL19	EIF4A3
RPL19	DDX5
RPL19	KPNB1
RPL19	EIF1
RPL19	PSMC5
RPL19	SRP68
RPL19	EFTUD2
RPL19	MRPS7
RPL19	RPL38
RPL19	RPL27
RPL19	RPL23A
RPL19	RPL23
RPL23	CDC6
RPL23	RPL19
RPL23	DDX5
RPL23	MRPL27
RPL23	MRPS7
RPL23	TUBG1
RPL23	ERAL1
RPL23	UTP6
RPL23	EIF4A3
RPL23	KPNB1
RPL23	MRPL38
RPL23	RPL38
RPL23	PSMC5
RPL23	SRP68
RPL23	MRPL12
RPL23	RAD51C
RPL23	ANAPC11
RPL23	ATP5G1
RPL23	RPL23A
RPL23	EFTUD2
RPL23	FTSJ3
RPL23	SUMO2
RPL23	TOP2A
RPL23	NLE1
RPL23	EIF1
RPL23	LRRC37A3
RPL23	LUC7L3
RPL23	DDX42
RPL23	RAD51D
RPL23	CDC27
RPL23	PSMB3
RPL23	PHB
RPL23	RPL27
RPL23A	UTP18
RPL23A	RPL19
RPL23A	DDX5
RPL23A	MRPL27
RPL23A	MRPS7
RPL23A	UTP6
RPL23A	EIF4A3
RPL23A	KPNB1
RPL23A	UBTF
RPL23A	RPL38
RPL23A	PSMC5
RPL23A	SRP68
RPL23A	NPEPPS
RPL23A	UBE2O
RPL23A	MRPL12
RPL23A	RAD51C
RPL23A	GPS1
RPL23A	ATP5G1
RPL23A	CBX1
RPL23A	RAD51D
RPL23A	PSMB3
RPL23A	COASY
RPL23A	NMT1
RPL23A	ALYREF
RPL23A	CDC27
RPL23A	DDX42
RPL23A	DDX52
RPL23A	SUMO2
RPL23A	PHB
RPL23A	TBC1D3G
RPL23A	TBC1D3B
RPL23A	TBC1D3H
RPL23A	EIF1
RPL23A	FTSJ3
RPL23A	EFTUD2
RPL23A	NLE1
RPL23A	RPL23
RPL23A	RPL27
RPL27	UTP18
RPL27	RPL19
RPL27	DDX5
RPL27	MRPL27
RPL27	MRPS7
RPL27	EIF4A3
RPL27	KPNB1
RPL27	RPL38
RPL27	PSMC5
RPL27	SRP68
RPL27	MRPL12
RPL27	ANAPC11
RPL27	ATP5G1
RPL27	ZNF207
RPL27	RPL23A
RPL27	EFTUD2
RPL27	FTSJ3
RPL27	SUMO2
RPL27	NLE1
RPL27	EIF1
RPL27	RPL23
RPL27	ALYREF
RPL27	LUC7L3
RPL27	DDX42
RPL27	CLTC
RPL27	LSM12
RPL27	ZNHIT3
RPL27	PSMB3
RPL27	PHB
RPL38	RPL19
RPL38	DDX5
RPL38	MRPS7
RPL38	EIF4A3
RPL38	KPNB1
RPL38	UBTF
RPL38	MRPL38
RPL38	ATP5G1
RPL38	SUMO2
RPL38	NPEPPS
RPL38	DDX42
RPL38	POLG2
RPL38	MRPL12
RPL38	ANAPC11
RPL38	NMT1
RPL38	TOP2A
RPL38	PHB
RPL38	FTSJ3
RPL38	NLE1
RPL38	PSMC5
RPL38	EFTUD2
RPL38	EIF1
RPL38	SRP68
RPL38	RPL27
RPL38	RPL23
RPL38	RPL23A
RPTOR	DDX5
RPTOR	VMP1
RPTOR	EPN3
RPTOR	EIF4A3
RPTOR	MRPL10
RPTOR	UBTF
RPTOR	RAC3
RPTOR	SUPT6H
RPTOR	UBE2O
RPTOR	EFTUD2
RPTOR	NPEPPS
RPTOR	BRCA1
RPTOR	CLTC
RPTOR	EIF1
RPTOR	DDX42
RPTOR	GRB2
RPTOR	STAT5A
RPTOR	NLE1
SAP30BP	UTP6
SAP30BP	DHX8
SAP30BP	MED1
SAP30BP	UBTF
SAP30BP	SUPT6H
SAP30BP	SRSF2
SAP30BP	LUC7L3
SAP30BP	CDC27
SAP30BP	USP36
SAP30BP	PHB
SLC16A5	SLC35B1
SLC16A5	MRPS7
SLC16A5	ARMC7
SLC16A5	KRT10
SLC16A5	NPEPPS
SLC16A5	ZNHIT3
SLC25A10	CDC6
SLC25A10	MRPS7
SLC25A10	ERAL1
SLC25A10	UTP6
SLC25A10	PGS1
SLC25A10	RAC3
SLC25A10	MRPL38
SLC25A10	MRPS23
SLC25A10	MRPL12
SLC25A10	ANAPC11
SLC25A10	NDUFA8
SLC25A10	KRTAP4-2
SLC25A10	EFTUD2
SLC25A10	FDXR
SLC25A10	COASY
SLC25A10	PHB
SLC35B1	SUPT4H1
SLC35B1	MRPL27
SLC35B1	PHB
SLC35B1	COX11
SLC35B1	PSMC5
SLC35B1	ATP5G1
SLC35B1	SLC16A5
SLC35B1	PSMB3
SMARCE1	DDX5
SMARCE1	MED1
SMARCE1	UBTF
SMARCE1	JMJD6
SMARCE1	ZNF207
SMARCE1	BRCA1
SMARCE1	SRSF2
SMARCE1	LSM12
SMARCE1	FTSJ3
SMARCE1	CBX1
SMARCE1	PHF12
SMARCE1	TADA2A
SMARCE1	EFTUD2
SMARCE1	TOP2A
SMARCE1	EIF1
SMG8	DHX8
SMG8	EIF4A3
SMG8	RAD51C
SMG8	JMJD6
SMG8	EIF1
SMG8	PHB
SNF8	MRPL27
SNF8	MRPS7
SNF8	VPS25
SNF8	VMP1
SNF8	TMEM199
SNF8	PSMC5
SNF8	CHMP6
SNF8	HGS
SNF8	NPLOC4
SNF8	ATP5G1
SNF8	EFTUD2
SNF8	PHB
SNF8	PSMB3
SNF8	COASY
SRP68	RPL19
SRP68	DDX5
SRP68	EIF4A3
SRP68	RPL38
SRP68	PSMC5
SRP68	NMT1
SRP68	CDC27
SRP68	PSMB3
SRP68	EFTUD2
SRP68	UBE2O
SRP68	TEN1
SRP68	FTSJ3
SRP68	RPL27
SRP68	RPL23
SRP68	RPL23A
SRSF2	UTP18
SRSF2	SUPT4H1
SRSF2	DDX5
SRSF2	UTP6
SRSF2	DHX8
SRSF2	EIF4A3
SRSF2	KPNB1
SRSF2	MED1
SRSF2	UBTF
SRSF2	SUPT6H
SRSF2	SMARCE1
SRSF2	STAT5A
SRSF2	METTL23
SRSF2	EIF1
SRSF2	USP36
SRSF2	CDC27
SRSF2	SUMO2
SRSF2	JMJD6
SRSF2	PHB
SRSF2	LUC7L3
SRSF2	BRCA1
SRSF2	SAP30BP
SRSF2	ZNF207
SRSF2	CBX1
SRSF2	EFTUD2
SRSF2	TOP2A
SRSF2	DDX42
SRSF2	ALYREF
STAT5A	VPS25
STAT5A	BIRC5
STAT5A	RAC3
STAT5A	RPTOR
STAT5A	SUPT6H
STAT5A	HGS
STAT5A	TADA2A
STAT5A	SRSF2
STAT5A	SUMO2
STAT5A	PSMB3
STAT5A	CSH2
STAT5A	CBX1
STAT5A	GRB2
STAT5A	BRCA1
SUMO2	CDC6
SUMO2	RPL19
SUMO2	GOSR2
SUMO2	DDX5
SUMO2	MRPS7
SUMO2	ARMC7
SUMO2	TUBG1
SUMO2	VMP1
SUMO2	DHX8
SUMO2	EIF4A3
SUMO2	KRT10
SUMO2	KPNB1
SUMO2	BIRC5
SUMO2	UBTF
SUMO2	RAC3
SUMO2	MRPL38
SUMO2	RPL38
SUMO2	PSMC5
SUMO2	TUBD1
SUMO2	ARL4D
SUMO2	UBE2O
SUMO2	PHF12
SUMO2	HGS
SUMO2	NPLOC4
SUMO2	RAD51C
SUMO2	STAT5A
SUMO2	ANAPC11
SUMO2	SRSF2
SUMO2	CBX1
SUMO2	RPL23A
SUMO2	EFTUD2
SUMO2	DDX42
SUMO2	EIF1
SUMO2	AATF
SUMO2	TADA2A
SUMO2	CDC27
SUMO2	PSMB3
SUMO2	CLTC
SUMO2	RPL27
SUMO2	RAD51D
SUMO2	RPL23
SUMO2	BRCA1
SUMO2	TOP2A
SUPT4H1	PSMC5
SUPT4H1	INTS2
SUPT4H1	TOP2A
SUPT4H1	TBC1D3H
SUPT4H1	TBC1D3B
SUPT4H1	TBC1D3G
SUPT4H1	MRPS23
SUPT4H1	UBTF
SUPT4H1	SLC35B1
SUPT4H1	SRSF2
SUPT4H1	PSMB3
SUPT4H1	LSM12
SUPT4H1	GOSR2
SUPT4H1	ALYREF
SUPT4H1	KPNB1
SUPT4H1	SUPT6H
SUPT6H	UTP18
SUPT6H	SUPT4H1
SUPT6H	DDX5
SUPT6H	ERAL1
SUPT6H	UTP6
SUPT6H	DHX8
SUPT6H	EIF4A3
SUPT6H	MED1
SUPT6H	UBTF
SUPT6H	RPTOR
SUPT6H	ZNF207
SUPT6H	CBX1
SUPT6H	DDX42
SUPT6H	FTSJ3
SUPT6H	RAD51C
SUPT6H	SAP30BP
SUPT6H	STAT5A
SUPT6H	CLTC
SUPT6H	TOP2A
SUPT6H	SRSF2
SUPT6H	EFTUD2
SUPT6H	CDC27
SUPT6H	PHF12
SUPT6H	ALYREF
TADA2A	DDX5
TADA2A	MED1
TADA2A	SMARCE1
TADA2A	PHF12
TADA2A	HGS
TADA2A	STAT5A
TADA2A	SUMO2
TADA2A	TOP2A
TADA2A	ALYREF
TADA2A	LUC7L3
TADA2A	CDC27
TADA2A	TBC1D3G
TADA2A	AATF
TADA2A	DDX52
TADA2A	MRPL45
TADA2A	TBC1D3H
TADA2A	ZNHIT3
TBC1D3B	SUPT4H1
TBC1D3B	KPNB1
TBC1D3B	RAC3
TBC1D3B	ARL4D
TBC1D3B	RPL23A
TBC1D3B	LRRC37A3
TBC1D3G	SUPT4H1
TBC1D3G	KPNB1
TBC1D3G	RAC3
TBC1D3G	ARL4D
TBC1D3G	RPL23A
TBC1D3G	LRRC37A3
TBC1D3G	AATF
TBC1D3G	TADA2A
TBC1D3G	DDX52
TBC1D3G	ZNHIT3
TBC1D3H	SUPT4H1
TBC1D3H	KPNB1
TBC1D3H	RAC3
TBC1D3H	ARL4D
TBC1D3H	RPL23A
TBC1D3H	LRRC37A3
TBC1D3H	AATF
TBC1D3H	DDX52
TBC1D3H	TADA2A
TBC1D3H	ZNHIT3
TEN1	DDX5
TEN1	ARMC7
TEN1	EPN3
TEN1	SRP68
TEN1	UBE2O
TEN1	LUC7L3
TEN1	BRCA1
TEN1	INTS2
TMEM199	SNF8
TMEM199	NDUFA8
TMEM199	PSMB3
TMEM199	ATP5G1
TOP2A	CDC6
TOP2A	UTP18
TOP2A	SUPT4H1
TOP2A	DDX5
TOP2A	MRPL27
TOP2A	MRPS7
TOP2A	TUBG1
TOP2A	ERAL1
TOP2A	BRIP1
TOP2A	UTP6
TOP2A	DHX8
TOP2A	KANSL1
TOP2A	KRT10
TOP2A	KPNB1
TOP2A	MED1
TOP2A	BIRC5
TOP2A	UBTF
TOP2A	RPL38
TOP2A	PSMC5
TOP2A	PPM1E
TOP2A	SUPT6H
TOP2A	TUBD1
TOP2A	SMARCE1
TOP2A	RAD51C
TOP2A	ZNF830
TOP2A	GPS1
TOP2A	SRSF2
TOP2A	ATP5G1
TOP2A	CBX1
TOP2A	EFTUD2
TOP2A	SUMO2
TOP2A	ALYREF
TOP2A	DDX52
TOP2A	FDXR
TOP2A	PSMB3
TOP2A	CDC27
TOP2A	POLG2
TOP2A	TADA2A
TOP2A	RPL23
TOP2A	RAD51D
TOP2A	PPY
TOP2A	DDX42
TOP2A	BRCA1
TSEN54	KANSL1
TSEN54	UBE2O
TSEN54	METTL23
TUBD1	CDC6
TUBD1	RPL19
TUBD1	TUBG1
TUBD1	BRIP1
TUBD1	VMP1
TUBD1	RAC3
TUBD1	PSMC5
TUBD1	PPM1E
TUBD1	TOP2A
TUBD1	ARL4D
TUBD1	EFTUD2
TUBD1	RAD51D
TUBD1	USP36
TUBD1	EIF1
TUBD1	POLG2
TUBD1	SUMO2
TUBD1	CLTC
TUBD1	RAD51C
TUBD1	INTS2
TUBG1	CDC6
TUBG1	RPL19
TUBG1	MRPS7
TUBG1	PSMB3
TUBG1	ARL4D
TUBG1	RAD51D
TUBG1	BRIP1
TUBG1	DHX8
TUBG1	MRPL12
TUBG1	EIF4A3
TUBG1	TUBD1
TUBG1	ANAPC11
TUBG1	RAD51C
TUBG1	RPL23
TUBG1	SUMO2
TUBG1	PSMC5
TUBG1	GPS1
TUBG1	BIRC5
TUBG1	RAC3
TUBG1	TOP2A
TUBG1	EFTUD2
TUBG1	PHB
TUBG1	CDC27
TUBG1	BRCA1
UBE2O	DDX5
UBE2O	UBTF
UBE2O	RPTOR
UBE2O	MRPL38
UBE2O	SRP68
UBE2O	KLHL11
UBE2O	CDC27
UBE2O	BRCA1
UBE2O	RPL23A
UBE2O	PHF12
UBE2O	RAD51C
UBE2O	RAD51D
UBE2O	ZNF207
UBE2O	METTL23
UBE2O	TSEN54
UBE2O	EFTUD2
UBE2O	FTSJ3
UBE2O	SUMO2
UBE2O	ANAPC11
UBE2O	TEN1
UBTF	CDC6
UBTF	SUPT4H1
UBTF	DDX5
UBTF	DHX8
UBTF	NLE1
UBTF	PHB
UBTF	FTSJ3
UBTF	DDX42
UBTF	UBE2O
UBTF	SAP30BP
UBTF	EFTUD2
UBTF	CBX1
UBTF	PHF12
UBTF	EIF1
UBTF	RPL23A
UBTF	SMARCE1
UBTF	GRB2
UBTF	RPTOR
UBTF	USP36
UBTF	SUMO2
UBTF	RPL38
UBTF	TOP2A
UBTF	SRSF2
UBTF	BRCA1
UBTF	CDC27
UBTF	SUPT6H
USP36	UTP18
USP36	UTP6
USP36	DHX8
USP36	EIF4A3
USP36	UBTF
USP36	TUBD1
USP36	GPS1
USP36	SRSF2
USP36	CBX1
USP36	EFTUD2
USP36	JMJD6
USP36	FTSJ3
USP36	BRCA1
USP36	ALYREF
USP36	CDC27
USP36	SAP30BP
UTP18	PSMC5
UTP18	SRSF2
UTP18	RPL23A
UTP18	RPL19
UTP18	POLG2
UTP18	MRPS23
UTP18	JMJD6
UTP18	RAD51C
UTP18	RPL27
UTP18	ALYREF
UTP18	TOP2A
UTP18	SUPT6H
UTP18	DDX42
UTP18	KPNB1
UTP18	USP36
UTP18	EFTUD2
UTP18	DDX5
UTP18	DHX8
UTP18	EIF4A3
UTP18	MRPS7
UTP18	NLE1
UTP18	DDX52
UTP18	FTSJ3
UTP18	AATF
UTP18	UTP6
UTP6	CDC6
UTP6	UTP18
UTP6	DDX5
UTP6	MRPS7
UTP6	RPL23
UTP6	SAP30BP
UTP6	RPL23A
UTP6	POLG2
UTP6	DDX42
UTP6	TOP2A
UTP6	PSMC5
UTP6	SUPT6H
UTP6	USP36
UTP6	CDC27
UTP6	EFTUD2
UTP6	KPNB1
UTP6	SRSF2
UTP6	ZNF207
UTP6	DHX8
UTP6	SLC25A10
UTP6	LRRC37B
UTP6	NLE1
UTP6	EIF4A3
UTP6	DDX52
UTP6	AATF
UTP6	FTSJ3
VMP1	DDX5
VMP1	ARMC7
VMP1	SUMO2
VMP1	RPTOR
VMP1	SNF8
VMP1	INTS2
VMP1	HGS
VMP1	TUBD1
VMP1	CLTC
VPS25	LSM12
VPS25	BIRC5
VPS25	ERAL1
VPS25	KLHL11
VPS25	PSMB3
VPS25	NMT1
VPS25	STAT5A
VPS25	CLTC
VPS25	NPLOC4
VPS25	HGS
VPS25	SNF8
VPS25	CHMP6
ZNF207	DDX5
ZNF207	UTP6
ZNF207	EIF4A3
ZNF207	KPNB1
ZNF207	PPM1E
ZNF207	SUPT6H
ZNF207	UBE2O
ZNF207	SMARCE1
ZNF207	LRRC37B
ZNF207	SRSF2
ZNF207	CBX1
ZNF207	RPL27
ZNF207	BRCA1
ZNF207	LUC7L3
ZNF830	PPM1E
ZNF830	EFTUD2
ZNF830	TOP2A
ZNHIT3	C17orf82
ZNHIT3	SLC16A5
ZNHIT3	TBC1D3G
ZNHIT3	RPL27
ZNHIT3	AATF
ZNHIT3	DDX52
ZNHIT3	TADA2A
ZNHIT3	TBC1D3H

## Sheet: Figure 1D and E
samplenames	Group	efs_day	os_day		https://hgserver1.amc.nl/cgi-bin/r2/main.cgi
gsm1205239	cluster 1	2016	2836		GSE62564
gsm1205241	cluster 1	2046	2046
gsm1205242	cluster 1	212	220
gsm1205248	cluster 1	2094	2094
gsm1205250	cluster 1	357	479
gsm1205251	cluster 1	3064	3064
gsm1205252	cluster 1	414	1327
gsm1205253	cluster 1	2717	2717
gsm1205254	cluster 1	2863	2863
gsm1205255	cluster 1	3508	3508
gsm1205256	cluster 1	2499	2499
gsm1205257	cluster 1	3468	3468
gsm1205258	cluster 1	3149	3149
gsm1205259	cluster 1	5263	5263
gsm1205260	cluster 1	4492	4492
gsm1205261	cluster 1	4051	4051
gsm1205262	cluster 1	2101	2101
gsm1205263	cluster 1	707	707
gsm1205264	cluster 1	3753	3753
gsm1205265	cluster 1	3268	3268
gsm1205266	cluster 1	1372	1372
gsm1205267	cluster 1	4353	4353
gsm1205268	cluster 1	4823	4823
gsm1205269	cluster 1	3675	3675
gsm1205270	cluster 1	4877	4877
gsm1205271	cluster 1	4240	4240
gsm1205272	cluster 1	3807	3807
gsm1205273	cluster 1	4972	4972
gsm1205274	cluster 1	4662	4662
gsm1205276	cluster 1	3750	3750
gsm1205277	cluster 1	3753	3753
gsm1205278	cluster 1	3312	3312
gsm1205279	cluster 1	4365	4365
gsm1205280	cluster 1	1589	1589
gsm1205281	cluster 1	2591	2591
gsm1205282	cluster 1	3452	3452
gsm1205283	cluster 1	3984	3984
gsm1205284	cluster 1	3428	3428
gsm1205285	cluster 1	1924	1924
gsm1205286	cluster 1	3941	3941
gsm1205287	cluster 1	3456	3456
gsm1205288	cluster 1	2753	2753
gsm1205289	cluster 1	5435	5435
gsm1205290	cluster 1	2055	2055
gsm1205291	cluster 1	2723	2723
gsm1205292	cluster 1	2504	2504
gsm1205293	cluster 1	4556	4556
gsm1205295	cluster 1	3301	3301
gsm1205296	cluster 1	3990	3990
gsm1205297	cluster 1	4061	4061
gsm1205298	cluster 1	3575	3575
gsm1205299	cluster 1	4997	4997
gsm1205300	cluster 1	485	3635
gsm1205301	cluster 1	3675	3675
gsm1205302	cluster 1	1211	1211
gsm1205303	cluster 1	651	2773
gsm1205304	cluster 1	4494	4494
gsm1205305	cluster 1	5131	5131
gsm1205306	cluster 1	483	846
gsm1205307	cluster 1	3691	3691
gsm1205308	cluster 1	3832	3832
gsm1205309	cluster 1	6482	6482
gsm1205312	cluster 1	994	994
gsm1205313	cluster 1	4440	4440
gsm1205314	cluster 1	4600	4600
gsm1205315	cluster 1	3111	3111
gsm1205316	cluster 1	5147	5147
gsm1205317	cluster 1	402	416
gsm1205318	cluster 1	2828	2828
gsm1205321	cluster 1	5234	5234
gsm1205322	cluster 1	5133	5133
gsm1205325	cluster 1	5318	5318
gsm1205327	cluster 1	555	763
gsm1205328	cluster 1	1480	3804
gsm1205330	cluster 1	3935	3935
gsm1205332	cluster 1	3883	3883
gsm1205333	cluster 1	3977	3977
gsm1205334	cluster 1	3641	3641
gsm1205335	cluster 1	4042	4042
gsm1205336	cluster 1	2167	2167
gsm1205337	cluster 1	3013	3013
gsm1205338	cluster 1	2355	2355
gsm1205339	cluster 1	2432	2432
gsm1205340	cluster 1	363	2694
gsm1205341	cluster 1	2549	2549
gsm1205342	cluster 1	3703	3703
gsm1205343	cluster 1	33	3898
gsm1205344	cluster 1	883	883
gsm1205345	cluster 1	2808	2808
gsm1205347	cluster 1	4480	4480
gsm1205348	cluster 1	3957	3957
gsm1205349	cluster 1	2832	2832
gsm1205350	cluster 1	112	3283
gsm1205351	cluster 1	2673	2673
gsm1205352	cluster 1	3707	3707
gsm1205353	cluster 1	2458	2458
gsm1205354	cluster 1	132	3217
gsm1205355	cluster 1	1016	1016
gsm1205356	cluster 1	674	1820
gsm1205357	cluster 1	3201	3201
gsm1205358	cluster 1	2500	2500
gsm1205360	cluster 1	3324	3324
gsm1205362	cluster 1	3221	3221
gsm1205363	cluster 1	2405	2405
gsm1205364	cluster 1	5813	5813
gsm1205365	cluster 1	2552	2552
gsm1205366	cluster 1	2365	2365
gsm1205367	cluster 1	1128	3561
gsm1205368	cluster 1	1001	1001
gsm1205369	cluster 1	4522	4522
gsm1205370	cluster 1	206	3604
gsm1205371	cluster 1	3869	3869
gsm1205372	cluster 1	5117	5117
gsm1205373	cluster 1	522	1655
gsm1205376	cluster 1	4195	4195
gsm1205377	cluster 1	645	899
gsm1205378	cluster 1	3660	3660
gsm1205379	cluster 1	3405	3405
gsm1205380	cluster 1	4096	4096
gsm1205382	cluster 1	2835	2835
gsm1205383	cluster 1	2680	2680
gsm1205384	cluster 1	2029	2029
gsm1205385	cluster 1	2375	2375
gsm1205387	cluster 1	3250	3250
gsm1205388	cluster 1	1758	1758
gsm1205389	cluster 1	4378	4378
gsm1205390	cluster 1	2651	2651
gsm1205391	cluster 1	3584	3584
gsm1205392	cluster 1	3578	3578
gsm1205393	cluster 1	2774	2774
gsm1205394	cluster 1	1440	1440
gsm1205395	cluster 1	1926	1926
gsm1205396	cluster 1	2534	2534
gsm1205398	cluster 1	1463	1463
gsm1205399	cluster 1	2337	2337
gsm1205400	cluster 1	2283	2283
gsm1205401	cluster 1	2175	2175
gsm1205402	cluster 1	1818	1818
gsm1205403	cluster 1	2114	2114
gsm1205404	cluster 1	1663	1663
gsm1205405	cluster 1	1483	1483
gsm1205407	cluster 1	192	3436
gsm1205408	cluster 1	2310	2310
gsm1205409	cluster 1	1406	1406
gsm1205410	cluster 1	134	3385
gsm1205411	cluster 1	3411	3411
gsm1205413	cluster 1	1514	1514
gsm1205414	cluster 1	70	2359
gsm1205416	cluster 1	83	1930
gsm1205417	cluster 1	2092	2092
gsm1205418	cluster 1	390	1674
gsm1205419	cluster 1	1726	1726
gsm1205420	cluster 1	1995	1995
gsm1205421	cluster 1	1597	1597
gsm1205423	cluster 1	74	1445
gsm1205424	cluster 1	2462	2462
gsm1205426	cluster 1	295	1514
gsm1205427	cluster 1	540	1120
gsm1205428	cluster 1	321	2133
gsm1205430	cluster 1	2276	2276
gsm1205431	cluster 1	330	404
gsm1205433	cluster 1	2797	2797
gsm1205434	cluster 1	98	103
gsm1205436	cluster 1	1513	1513
gsm1205437	cluster 1	2140	2140
gsm1205438	cluster 1	776	776
gsm1205439	cluster 1	1441	1441
gsm1205440	cluster 1	1953	1953
gsm1205441	cluster 1	1810	1810
gsm1205444	cluster 1	1546	1546
gsm1205445	cluster 1	1866	1866
gsm1205446	cluster 1	2008	2008
gsm1205447	cluster 1	2263	2263
gsm1205448	cluster 1	1294	1294
gsm1205449	cluster 1	68	1919
gsm1205450	cluster 1	1645	1645
gsm1205452	cluster 1	1994	1994
gsm1205454	cluster 1	1306	1306
gsm1205455	cluster 1	1757	1757
gsm1205456	cluster 1	1518	1518
gsm1205457	cluster 1	1818	1818
gsm1205458	cluster 1	4373	4373
gsm1205460	cluster 1	188	1694
gsm1205461	cluster 1	1576	5860
gsm1205462	cluster 1	1683	1683
gsm1205463	cluster 1	1783	1783
gsm1205465	cluster 1	1553	1553
gsm1205466	cluster 1	1690	1690
gsm1205467	cluster 1	390	390
gsm1205469	cluster 1	59	1705
gsm1205470	cluster 1	75	1847
gsm1205471	cluster 1	186	1323
gsm1205472	cluster 1	493	4922
gsm1205474	cluster 1	2197	2197
gsm1205475	cluster 1	2807	2807
gsm1205476	cluster 1	2100	2100
gsm1205477	cluster 1	1399	3568
gsm1205481	cluster 1	475	601
gsm1205483	cluster 1	1863	1925
gsm1205488	cluster 1	4508	4508
gsm1205495	cluster 1	2092	2092
gsm1205498	cluster 1	3570	3570
gsm1205500	cluster 1	214	360
gsm1205501	cluster 1	443	784
gsm1205503	cluster 1	2086	2086
gsm1205504	cluster 1	1197	1695
gsm1205505	cluster 1	363	499
gsm1205506	cluster 1	946	1375
gsm1205508	cluster 1	305	375
gsm1205510	cluster 1	318	2907
gsm1205511	cluster 1	1047	1047
gsm1205512	cluster 1	3571	3571
gsm1205513	cluster 1	3163	3163
gsm1205514	cluster 1	4844	4844
gsm1205515	cluster 1	3328	3328
gsm1205516	cluster 1	3245	3245
gsm1205517	cluster 1	3493	3493
gsm1205518	cluster 1	5060	5060
gsm1205519	cluster 1	286	2280
gsm1205520	cluster 1	3340	3340
gsm1205521	cluster 1	296	2785
gsm1205522	cluster 1	3901	3901
gsm1205523	cluster 1	3451	3451
gsm1205524	cluster 1	1262	2410
gsm1205525	cluster 1	2641	2641
gsm1205526	cluster 1	399	419
gsm1205527	cluster 1	2631	2631
gsm1205528	cluster 1	2588	2588
gsm1205529	cluster 1	1579	1579
gsm1205530	cluster 1	2425	2425
gsm1205531	cluster 1	2249	2249
gsm1205532	cluster 1	17	1647
gsm1205533	cluster 1	2245	2245
gsm1205534	cluster 1	301	2169
gsm1205535	cluster 1	998	998
gsm1205536	cluster 1	2113	2113
gsm1205537	cluster 1	1567	3303
gsm1205538	cluster 1	1393	1393
gsm1205539	cluster 1	86	1689
gsm1205540	cluster 1	1323	1323
gsm1205542	cluster 1	66	66
gsm1205543	cluster 1	2482	2482
gsm1205544	cluster 1	1439	1439
gsm1205545	cluster 1	1998	1998
gsm1205546	cluster 1	164	1907
gsm1205547	cluster 1	2103	2103
gsm1205548	cluster 1	207	2798
gsm1205549	cluster 1	2724	2724
gsm1205551	cluster 1	351	539
gsm1205552	cluster 1	1870	1870
gsm1205553	cluster 1	161	209
gsm1205554	cluster 1	1069	1069
gsm1205555	cluster 1	1140	1140
gsm1205558	cluster 1	181	846
gsm1205561	cluster 1	1740	1740
gsm1205562	cluster 1	1110	1110
gsm1205563	cluster 1	90	90
gsm1205564	cluster 1	570	720
gsm1205568	cluster 1	576	1049
gsm1205574	cluster 1	112	239
gsm1205577	cluster 1	810	810
gsm1205578	cluster 1	120	1440
gsm1205579	cluster 1	1410	1410
gsm1205580	cluster 1	150	150
gsm1205581	cluster 1	720	720
gsm1205582	cluster 1	1470	1470
gsm1205583	cluster 1	1590	1590
gsm1205584	cluster 1	1080	1080
gsm1205585	cluster 1	1984	1984
gsm1205587	cluster 1	4890	4890
gsm1205591	cluster 1	354	441
gsm1205592	cluster 1	2804	2804
gsm1205593	cluster 1	4602	4602
gsm1205594	cluster 1	74	3903
gsm1205595	cluster 1	98	4410
gsm1205599	cluster 1	563	1073
gsm1205600	cluster 1	1330	1330
gsm1205601	cluster 1	1890	1890
gsm1205602	cluster 1	1567	1567
gsm1205604	cluster 1	3131	3131
gsm1205605	cluster 1	2852	2852
gsm1205607	cluster 1	2015	2015
gsm1205617	cluster 1	2771	2771
gsm1205618	cluster 1	314	345
gsm1205619	cluster 1	5070	5070
gsm1205620	cluster 1	201	207
gsm1205623	cluster 1	622	2132
gsm1205626	cluster 1	4090	4090
gsm1205631	cluster 1	828	2269
gsm1205632	cluster 1	2442	2442
gsm1205634	cluster 1	3571	3571
gsm1205635	cluster 1	293	2807
gsm1205639	cluster 1	833	1242
gsm1205640	cluster 1	55	203
gsm1205641	cluster 1	407	425
gsm1205645	cluster 1	454	555
gsm1205646	cluster 1	588	588
gsm1205649	cluster 1	874	2141
gsm1205650	cluster 1	232	232
gsm1205653	cluster 1	337	966
gsm1205654	cluster 1	1176	1176
gsm1205656	cluster 1	264	264
gsm1205657	cluster 1	1862	1862
gsm1205658	cluster 1	1916	1916
gsm1205660	cluster 1	1122	1423
gsm1205661	cluster 1	1239	1239
gsm1205664	cluster 1	1598	1598
gsm1205665	cluster 1	1053	1053
gsm1205666	cluster 1	2977	2977
gsm1205667	cluster 1	566	1379
gsm1205670	cluster 1	1242	1242
gsm1205696	cluster 1	1195	1195
gsm1205698	cluster 1	577	577
gsm1205701	cluster 1	101	167
gsm1205706	cluster 1	636	648
gsm1205707	cluster 1	2886	2886
gsm1205708	cluster 1	2591	2591
gsm1205711	cluster 1	33	1903
gsm1205713	cluster 1	1059	1059
gsm1205714	cluster 1	981	981
gsm1205716	cluster 1	1531	1531
gsm1205719	cluster 1	152	152
gsm1205720	cluster 1	715	1854
gsm1205722	cluster 1	92	92
gsm1205724	cluster 1	1117	1117
gsm1205725	cluster 1	995	995
gsm1205727	cluster 1	1094	1098
gsm1205729	cluster 1	738	892
gsm1205730	cluster 1	4487	4487
gsm1205731	cluster 1	4828	4828
gsm1205732	cluster 1	2467	2467
gsm1205733	cluster 1	105	5780
gsm1205735	cluster 1	2772	2772
gsm1205238	cluster 2	593	1362
gsm1205240	cluster 2	840	1191
gsm1205243	cluster 2	2217	2217
gsm1205244	cluster 2	562	3152
gsm1205245	cluster 2	3526	3526
gsm1205246	cluster 2	2306	2306
gsm1205247	cluster 2	620	1081
gsm1205249	cluster 2	1799	1799
gsm1205275	cluster 2	4521	4521
gsm1205294	cluster 2	3352	3352
gsm1205310	cluster 2	3566	3566
gsm1205311	cluster 2	1246	3555
gsm1205319	cluster 2	3631	3631
gsm1205320	cluster 2	3208	3208
gsm1205323	cluster 2	1752	3817
gsm1205324	cluster 2	1890	2884
gsm1205326	cluster 2	3576	3576
gsm1205329	cluster 2	497	1445
gsm1205331	cluster 2	486	1293
gsm1205346	cluster 2	168	2941
gsm1205359	cluster 2	759	1773
gsm1205361	cluster 2	54	2965
gsm1205374	cluster 2	250	364
gsm1205375	cluster 2	3488	3488
gsm1205381	cluster 2	2484	2484
gsm1205386	cluster 2	56	522
gsm1205397	cluster 2	1211	1211
gsm1205406	cluster 2	524	592
gsm1205412	cluster 2	1595	1595
gsm1205415	cluster 2	2099	2099
gsm1205422	cluster 2	2140	2140
gsm1205425	cluster 2	349	1123
gsm1205429	cluster 2	866	1540
gsm1205432	cluster 2	347	360
gsm1205435	cluster 2	417	526
gsm1205442	cluster 2	1086	1086
gsm1205443	cluster 2	2812	2812
gsm1205451	cluster 2	1493	1493
gsm1205453	cluster 2	2656	2656
gsm1205459	cluster 2	928	1008
gsm1205464	cluster 2	155	2556
gsm1205468	cluster 2	738	1624
gsm1205473	cluster 2	1260	1260
gsm1205478	cluster 2	1401	1401
gsm1205479	cluster 2	532	626
gsm1205480	cluster 2	2790	2790
gsm1205482	cluster 2	753	2808
gsm1205484	cluster 2	886	1560
gsm1205485	cluster 2	1624	1624
gsm1205486	cluster 2	2208	2208
gsm1205487	cluster 2	532	1118
gsm1205489	cluster 2	780	843
gsm1205490	cluster 2	1647	1647
gsm1205491	cluster 2	2149	2149
gsm1205492	cluster 2	518	602
gsm1205493	cluster 2	482	889
gsm1205494	cluster 2	441	478
gsm1205496	cluster 2	433	711
gsm1205497	cluster 2	1792	1792
gsm1205499	cluster 2	431	454
gsm1205502	cluster 2	2275	2275
gsm1205507	cluster 2	326	391
gsm1205509	cluster 2	468	1699
gsm1205541	cluster 2	2005	2005
gsm1205550	cluster 2	2101	2101
gsm1205556	cluster 2	286	412
gsm1205557	cluster 2	375	735
gsm1205559	cluster 2	323	487
gsm1205560	cluster 2	302	510
gsm1205565	cluster 2	300	330
gsm1205566	cluster 2	4669	4669
gsm1205567	cluster 2	2947	2947
gsm1205569	cluster 2	2871	2871
gsm1205570	cluster 2	602	1229
gsm1205571	cluster 2	2135	2135
gsm1205572	cluster 2	349	1341
gsm1205573	cluster 2	837	2051
gsm1205575	cluster 2	2432	2432
gsm1205576	cluster 2	269	269
gsm1205586	cluster 2	5040	5040
gsm1205588	cluster 2	6600	6600
gsm1205589	cluster 2	2280	2280
gsm1205590	cluster 2	1170	2010
gsm1205596	cluster 2	708	1152
gsm1205597	cluster 2	454	1063
gsm1205598	cluster 2	418	1628
gsm1205603	cluster 2	3625	3625
gsm1205606	cluster 2	634	727
gsm1205608	cluster 2	262	541
gsm1205609	cluster 2	164	2174
gsm1205610	cluster 2	187	209
gsm1205611	cluster 2	147	3234
gsm1205612	cluster 2	218	364
gsm1205613	cluster 2	227	498
gsm1205614	cluster 2	1455	2324
gsm1205615	cluster 2	245	415
gsm1205616	cluster 2	2054	2054
gsm1205621	cluster 2	705	3809
gsm1205622	cluster 2	812	1454
gsm1205624	cluster 2	3011	3011
gsm1205625	cluster 2	196	1014
gsm1205627	cluster 2	377	467
gsm1205628	cluster 2	2818	2818
gsm1205629	cluster 2	593	766
gsm1205630	cluster 2	615	1235
gsm1205633	cluster 2	970	1401
gsm1205636	cluster 2	978	978
gsm1205637	cluster 2	499	834
gsm1205638	cluster 2	1002	1382
gsm1205642	cluster 2	608	608
gsm1205643	cluster 2	336	380
gsm1205644	cluster 2	382	463
gsm1205647	cluster 2	259	259
gsm1205648	cluster 2	834	1266
gsm1205651	cluster 2	287	663
gsm1205652	cluster 2	623	785
gsm1205655	cluster 2	1035	1035
gsm1205659	cluster 2	668	1174
gsm1205662	cluster 2	1813	1813
gsm1205663	cluster 2	2669	2669
gsm1205668	cluster 2	280	280
gsm1205669	cluster 2	3238	3238
gsm1205671	cluster 2	3045	3045
gsm1205672	cluster 2	1705	1705
gsm1205673	cluster 2	3846	3846
gsm1205674	cluster 2	8	12
gsm1205675	cluster 2	438	454
gsm1205676	cluster 2	814	928
gsm1205677	cluster 2	475	798
gsm1205678	cluster 2	2989	2989
gsm1205679	cluster 2	45	1174
gsm1205680	cluster 2	453	476
gsm1205681	cluster 2	322	593
gsm1205682	cluster 2	147	218
gsm1205683	cluster 2	83	1187
gsm1205684	cluster 2	424	1058
gsm1205685	cluster 2	123	600
gsm1205686	cluster 2	2739	2739
gsm1205687	cluster 2	4890	4890
gsm1205688	cluster 2	4110	4110
gsm1205689	cluster 2	1560	1560
gsm1205690	cluster 2	1290	1290
gsm1205691	cluster 2	47	200
gsm1205692	cluster 2	2222	2222
gsm1205693	cluster 2	317	495
gsm1205694	cluster 2	870	870
gsm1205695	cluster 2	631	1397
gsm1205697	cluster 2	657	1391
gsm1205699	cluster 2	652	652
gsm1205700	cluster 2	239	629
gsm1205702	cluster 2	404	404
gsm1205703	cluster 2	647	651
gsm1205704	cluster 2	268	268
gsm1205705	cluster 2	121	176
gsm1205709	cluster 2	1235	1235
gsm1205710	cluster 2	1788	1788
gsm1205712	cluster 2	250	262
gsm1205715	cluster 2	3567	3567
gsm1205717	cluster 2	229	229
gsm1205718	cluster 2	383	383
gsm1205721	cluster 2	187	187
gsm1205723	cluster 2	394	413
gsm1205726	cluster 2	877	877
gsm1205728	cluster 2	691	987
gsm1205734	cluster 2	4883	4883
