# Supplementary material for: Metabolic reprogramming of cancer cells by JMJD6-mediated pre-mRNA splicing associated with therapeutic response to splicing inhibitor
Source: eLife journal article supplement (doi:10.7554/elife.90993), 2023-11-01

Figure 1—supplement 1A, 1B

<https://hgserver1.amc.nl/cgi-bin/r2/main.cgi>

Dataset: [GSE62564](http://www.ncbi.nlm.nih.gov/geo/query/acc.cgi?acc=GSE62564)


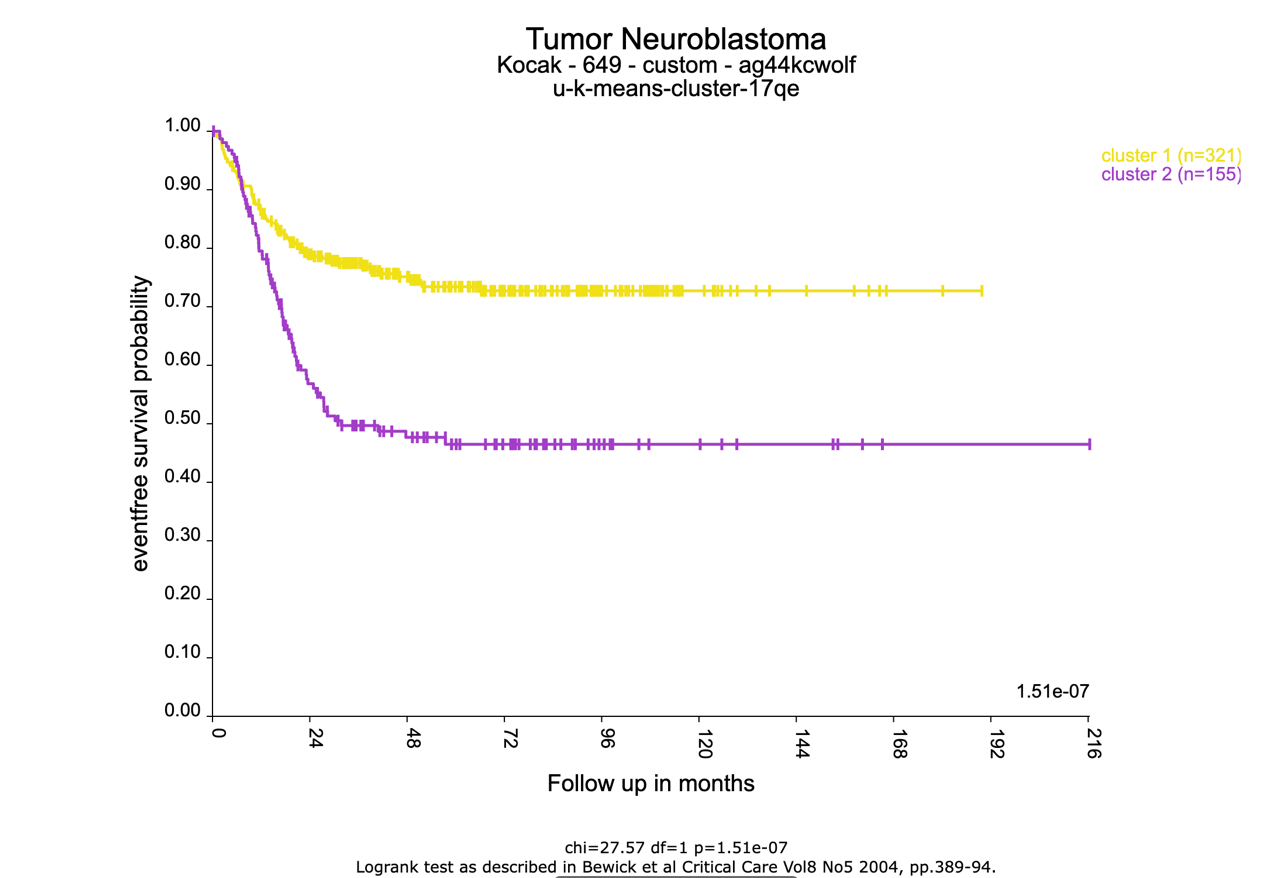


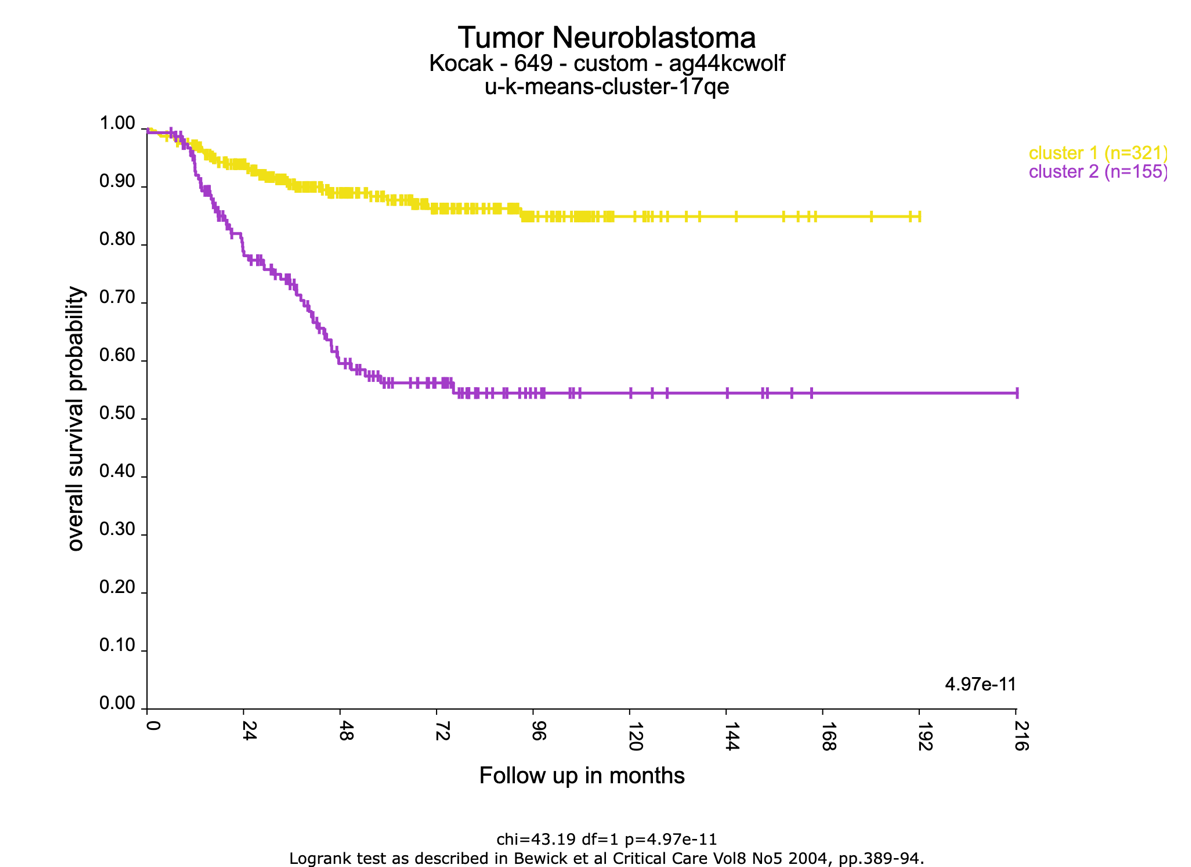

Supplement: data1 [file Figure 1-supplement 1-data source.docx]
