# Supplementary material for: Metabolic reprogramming of cancer cells by JMJD6-mediated pre-mRNA splicing associated with therapeutic response to splicing inhibitor
Source: eLife journal article supplement (doi:10.7554/elife.90993), 2023-11-01
Supplement: data1 [file Figure 1A- source data.xlsx]

## Sheet: Sheet1
Gene	SKNAS_AUTONOMIC_GANGLIA	SKNBE2_AUTONOMIC_GANGLIA	SKNDZ_AUTONOMIC_GANGLIA	SKNFI_AUTONOMIC_GANGLIA	CHP212_AUTONOMIC_GANGLIA	SIMA_AUTONOMIC_GANGLIA	MHHNB11_AUTONOMIC_GANGLIA	NB1_AUTONOMIC_GANGLIA	KELLY_AUTONOMIC_GANGLIA	KPNYN_AUTONOMIC_GANGLIA	IMR32_AUTONOMIC_GANGLIA	Score (mean)	Symbol	Location	Description
PSMB3	-1.57158	-1.59396	-1.4265	-1.98653	-1.44469	-1.62684	-1.86963	-1.92237	-1.6086	-1.97002	-1.77919	-1.70908	PSMB3	17q12	proteasome subunit beta 3
RPL23	-1.36492	-1.40826	-1.46229	-1.57366	-1.23721	-1.43106	-1.8255	-1.71502	-1.55078	-1.67508	-1.82903	-1.55207	RPL23	17q12	ribosomal protein L23
SRSF2	-1.20633	-1.35026	-1.45557	-1.52769	-1.23258	-1.29431	-1.30307	-1.50734	-1.33922	-1.50474	-1.36564	-1.37152	SRSF2	17q25.1	serine and arginine rich splicing factor 2
KPNB1	-1.26392	-1.3761	-1.36126	-1.33576	-1.34325	-1.46562	-1.28986	-1.40289	-1.32575	-1.61438	-1.26056	-1.36721	KPNB1	17q21.32	karyopherin subunit beta 1
SUPT6H	-1.23611	-1.2477	-1.29265	-1.35797	-1.19834	-1.2508	-1.32491	-1.66866	-1.24482	-1.75679	-1.42531	-1.364	SUPT6H	17q11.2	SPT6 homolog, histone chaperone
LUC7L3	-1.40825	-1.35987	-1.30977	-1.15285	-1.45354	-1.26099	-1.44433	-1.37437	-1.45122	-1.20757	-1.37378	-1.34514	LUC7L3	17q21.33	LUC7 like 3 pre-mRNA splicing factor
CDC27	-1.18043	-1.28406	-1.16954	-1.39193	-1.28745	-1.14919	-1.31754	-1.49716	-1.25881	-1.60443	-1.42016	-1.3237	CDC27	17q21.32	cell division cycle 27
TBC1D3C	-1.26242	-1.62755	-1.35282	-1.9551	-1.76784	-1.44513	-1.81398	-2.05199	-1.42892	-2.01628	2.55003	-1.28837	TBC1D3C	17q12	TBC1 domain family member 3C
BIRC5	-1.25259	-1.287	-1.39698	-1.61115	-0.99926	-1.16044	-1.22613	-1.19768	-1.33532	-1.52979	-1.09097	-1.28067	BIRC5	17q25.3	baculoviral IAP repeat containing 5
RPL27	-1.13021	-1.23319	-1.21621	-1.50322	-1.35719	-1.12364	-1.45747	-1.43819	-1.23467	-1.23852	-0.923776	-1.25966	RPL27	17q21.31	ribosomal protein L27
SAP30BP	-0.919004	-1.33941	-1.16765	-1.31046	-1.19773	-0.880125	-1.22879	-1.38965	-1.13781	-1.61746	-1.35115	-1.23084	SAP30BP	17q25.1	SAP30 binding protein
ANAPC11	-1.18584	-1.32203	-1.30785	-1.47899	-1.15086	-1.06275	-1.19421	-1.27049	-1.01808	-1.37335	-1.06514	-1.22087	ANAPC11	17q25.3	anaphase promoting complex subunit 11
TBC1D3H	-1.01736	-1.22092	-1.16794	-1.42401	-1.40993	-1.20873	-1.36611	-1.43531	-1.01606	-1.60752	-0.174211	-1.18619	TBC1D3H	17q12	TBC1 domain family member 3H
RPL19	-1.17447	-1.09263	-1.11302	-1.05264	-0.927297	-1.16297	-1.2921	-1.51744	-1.1281	-1.2527	-1.31846	-1.18471	RPL19	17q12	ribosomal protein L19
DHX8	-1.05666	-1.30939	-0.974385	-1.21633	-1.22156	-0.965849	-1.17695	-1.27727	-1.0938	-1.38657	-1.04527	-1.15673	DHX8	17q21.31	DEAH-box helicase 8
VPS25	-1.35953	-1.26853	-1.29402	-0.928009	-1.32471	-1.20436	-1.59078	-1.62837	-1.15325	-0.933739	0.0765019	-1.14625	VPS25	17q21.2	vacuolar protein sorting 25 homolog
CHMP6	-1.09052	-1.23687	-1.28589	-0.919005	-1.10738	-1.09671	-1.22399	-1.21707	-1.16912	-1.08788	-0.995577	-1.13	CHMP6	17q25.3	charged multivesicular body protein 6
TOP2A	-1.15347	-1.36285	-0.607945	-1.0801	-1.18682	-1.17722	-1.44819	-1.38633	-1.28221	-1.30672	-0.17676	-1.10624	TOP2A	17q21.2	DNA topoisomerase II alpha
CLTC	-1.2159	-0.960744	-1.12358	-0.995834	-1.22362	-1.01339	-1.09912	-1.12338	-0.999535	-1.03109	-0.981085	-1.06975	CLTC	17q23.1	clathrin heavy chain
CDC6	-0.902408	-1.11065	-0.830017	-1.12876	-0.863629	-0.90508	-1.13698	-1.23613	-1.05794	-1.22009	-1.14401	-1.0487	CDC6	17q21.2	cell division cycle 6
UBTF	-1.21644	-1.12016	-1.25245	-0.786888	-1.03478	-1.13293	-1.16305	-0.981555	-1.01304	-0.994957	-0.594114	-1.0264	UBTF	17q21.31	upstream binding transcription factor
ARMC7	-0.998598	-0.979554	-1.18484	-1.47631	-0.88209	-0.778463	-0.762176	-1.38226	-1.02448	-0.920588	-0.679816	-1.00629	ARMC7	17q25.1	armadillo repeat containing 7
PSMC5	-0.98643	-1.11087	-0.733368	-1.13785	-0.99625	-0.845314	-0.936084	-1.15829	-0.927813	-1.15337	-0.938695	-0.993121	PSMC5	17q23.3	proteasome 26S subunit, ATPase 5
EIF4A3	-0.85237	-0.949168	-1.10145	-1.23293	-0.871636	-0.798368	-0.90934	-0.752303	-1.06125	-1.28091	-0.78871	-0.963495	EIF4A3	17q25.3	eukaryotic translation initiation factor 4A3
RPL23A	-0.88327	-0.833277	-0.846273	-1.09245	-0.979565	-0.907466	-0.883086	-0.963178	-0.958527	-1.04025	-0.879865	-0.933383	RPL23A	17q11.2	ribosomal protein L23a
ZNF830	-1.10685	-0.929665	-0.890459	-0.909221	-1.03204	-0.916429	-1.04478	-1.03889	-1.11866	-1.01864	0.0258259	-0.907255	ZNF830	17q12	zinc finger protein 830
NLE1	-0.87439	-0.87273	-0.809577	-0.689513	-0.965691	-0.899094	-1.01432	-0.997247	-0.889393	-0.897104	-0.928585	-0.894331	NLE1	17q12	notchless homolog 1
TUBG1	-1.02095	-1.04313	-1.06487	-0.970211	-0.897362	-0.999997	-1.23839	-0.795134	-1.00953	-0.786648	0.0452988	-0.889175	TUBG1	17q21.2	tubulin gamma 1
PHB	-1.01865	-1.01122	-0.903373	-1.10825	-0.727371	-0.765229	-0.743162	-0.977327	-0.94069	-0.937337	-0.608081	-0.885517	PHB	17q21.33	prohibitin
NMT1	-0.847246	-0.968317	-0.881868	-0.816277	-0.669342	-0.803353	-0.762115	-1.14058	-1.04715	-0.716799	-0.807095	-0.860013	NMT1	17q21.31	N-myristoyltransferase 1
EFTUD2	-0.825107	-0.818774	-1.29818	-0.57109	-0.768081	-0.837185	-0.822585	-0.971265	-0.749706	-0.973005	-0.607235	-0.840201	EFTUD2	17q21.31	elongation factor Tu GTP binding domain containing 2
USP36	-0.932267	-1.0072	-0.968571	-0.807138	-0.998604	-1.0022	-0.908952	-0.90478	-0.89605	-0.754162	-0.0284777	-0.837127	USP36	17q25.3	ubiquitin specific peptidase 36
DDX42	-0.852606	-0.900194	-0.867249	-0.770907	-0.669552	-0.818708	-0.910408	-0.813858	-0.965031	-0.941406	-0.680315	-0.835476	DDX42	17q23.3	DEAD-box helicase 42
MRPS23	-0.694537	-0.89192	-0.548236	-0.574587	-0.671319	-0.879554	-0.829175	-1.34063	-0.989013	-0.739401	-0.866214	-0.820417	MRPS23	17q22	mitochondrial ribosomal protein S23
PGS1	-0.826512	-0.808124	-0.914221	-0.50168	-0.879672	-0.818855	-0.585659	-0.898867	-0.962521	-0.750954	-0.788418	-0.794135	PGS1	17q25.3	phosphatidylglycerophosphate synthase 1
GRB2	-0.345467	-0.877424	-0.573581	-0.955613	-0.331642	-1.03844	-0.939475	-1.08573	-1.0802	-0.859198	-0.608179	-0.79045	GRB2	17q25.1	growth factor receptor bound protein 2
MED1	-0.98444	-0.966886	-0.612377	-0.577304	-0.886888	-0.403942	-0.968395	-1.01177	-0.395218	-0.862593	-0.685731	-0.759595	MED1	17q12	mediator complex subunit 1
MRPL10	-0.559357	-0.786806	-0.516419	-0.688437	-0.815401	-0.797621	-0.766046	-1.06381	-0.962758	-0.497954	-0.824489	-0.752645	MRPL10	17q21.32	mitochondrial ribosomal protein L10
GPS1	-0.915355	-0.967755	-0.712729	-0.798108	-0.657804	-0.637802	-0.800826	-0.913756	-0.90809	-0.378463	-0.587444	-0.752557	GPS1	17q25.3	G protein pathway suppressor 1
RPL38	-0.758149	-0.879981	-0.78002	-0.806738	-0.60858	-0.593934	-0.812261	-0.63625	-0.722981	-0.813052	-0.802211	-0.746742	RPL38	17q25.1	ribosomal protein L38
CEP131	-0.603675	-0.769627	-0.825034	-0.742779	-0.612653	-0.859904	-0.871477	-0.703904	-0.59398	-0.823931	-0.801842	-0.746255	CEP131	17q25.3	centrosomal protein 131
PHF12	-0.696545	-0.645018	-1.00613	-0.520307	-0.263969	-0.83791	-1.08136	-1.30133	-0.526613	-0.559082	-0.758422	-0.745153	PHF12	17q11.2	PHD finger protein 12
ZNF207	-0.834678	-0.709368	-0.994488	-1.00112	-0.610465	-0.832291	-1.04802	-0.778372	-0.68935	-0.889532	0.40476	-0.72572	ZNF207	17q11.2	zinc finger protein 207
EIF1	-0.773731	-0.691463	-0.81096	-0.598869	-0.797263	-0.630528	-0.638474	-0.610945	-0.821707	-0.70278	-0.717255	-0.708543	EIF1	17q21.2	eukaryotic translation initiation factor 1
FDXR	-0.925738	-0.808128	-0.958232	-0.169124	-0.897784	-0.790562	-0.69217	-0.787676	-0.955518	-0.355217	-0.442162	-0.707483	FDXR	17q25.1	ferredoxin reductase
NPLOC4	-0.749027	-0.933286	-0.747973	-0.5361	-0.887993	-0.784424	-0.6395	-0.705918	-0.87694	-0.280938	-0.567723	-0.700893	NPLOC4	17q25.3	NPL4 homolog, ubiquitin recognition factor
RPTOR	-0.703719	-0.878729	-0.875311	-0.571175	-0.67352	-0.654313	-0.697652	-0.600416	-0.79027	-0.613999	-0.622426	-0.698321	RPTOR	17q25.3	regulatory associated protein of MTOR complex 1
MRPL27	-0.623642	-0.763817	-0.485615	-0.45728	-0.778624	-0.573468	-0.942763	-0.993695	-0.672513	-0.675182	-0.68975	-0.696032	MRPL27	17q21.33	mitochondrial ribosomal protein L27
MRPL45	-0.580516	-0.830054	-0.482051	-0.477163	-0.671976	-0.747735	-0.712098	-0.736652	-0.863314	-0.588609	-0.822926	-0.683009	MRPL45	17q12	mitochondrial ribosomal protein L45
TSEN54	-0.776172	-0.867633	-0.852683	-0.686525	-0.544986	-0.609714	-0.615293	-0.725804	-0.754832	-0.521005	-0.489743	-0.676763	TSEN54	17q25.1	tRNA splicing endonuclease subunit 54
MRPL12	-0.669	-0.709947	-0.671041	-0.43312	-0.785456	-0.694025	-0.783459	-0.796025	-0.837664	-0.525432	-0.519506	-0.674971	MRPL12	17q25.3	mitochondrial ribosomal protein L12
RAD51D	-0.550715	-0.671192	-0.487294	-0.362269	-0.918365	-0.756221	-0.733336	-0.888844	-0.740306	-0.527943	-0.721306	-0.66889	RAD51D	17q12	RAD51 paralog D
TMEM199	-0.848791	-0.691287	-0.795627	-0.441848	-0.642992	-0.836932	-0.784666	-0.750413	-0.799515	-0.480807	-0.257003	-0.666353	TMEM199	17q11.2	transmembrane protein 199
SUMO2	-0.687191	-0.888898	-0.606536	-0.604638	-0.578958	-0.604849	-0.704376	-0.737298	-0.585227	-0.675224	-0.589923	-0.660283	SUMO2	17q25.1	small ubiquitin-like modifier 2
VMP1	-0.790524	-0.845882	-0.751215	-0.617538	-0.729776	-0.503737	-0.812691	-0.582011	-0.726937	-0.666672	-0.173205	-0.654563	VMP1	17q23.1	vacuole membrane protein 1
KRTAP4-2	-0.339595	-0.695381	-0.52067	-0.630651	-0.813442	-0.705828	-0.835178	-0.669182	-0.6504	-0.694597	-0.624291	-0.652656	KRTAP4-2	17q21.2	keratin associated protein 4-2
GOSR2	-0.778141	-0.761614	-0.654262	-0.693239	-0.718712	-0.555752	-0.538786	-0.585889	-0.607351	-0.794519	-0.476496	-0.651342	GOSR2	17q21.32	golgi SNAP receptor complex member 2
SNF8	-0.768656	-0.658301	-0.86753	-0.536574	-0.621258	-0.631845	-0.554163	-0.803226	-0.726243	-0.500677	-0.479475	-0.649813	SNF8	17q21.32	SNF8, ESCRT-II complex subunit
SMARCE1	-0.658942	-0.671241	-0.627659	-0.407012	-0.600541	-0.550476	-0.688848	-0.708602	-0.750164	-0.778337	-0.600062	-0.640171	SMARCE1	17q21.2	SWI/SNF related, matrix associated, actin dependent regulator of chromatin, subfamily e, member 1
ZNHIT3	-0.865935	-0.688064	-0.819808	-0.499804	-0.747879	-0.647819	-0.805226	-0.777738	-0.668946	-0.362424	-0.132511	-0.637832	ZNHIT3	17q12	zinc finger HIT-type containing 3
C17orf82	-0.354981	-0.605235	-0.479642	-0.668631	-0.713378	-0.735531	-0.508689	-0.755491	-0.57865	-0.76892	-0.737964	-0.627919	C17orf82	17q23.2	chromosome 17 open reading frame 82
BRCA1	-0.461577	-0.685041	-0.470235	-0.539584	-0.690772	-0.656252	-0.731106	-0.649856	-0.698369	-0.695203	-0.526944	-0.618631	BRCA1	17q21.31	BRCA1, DNA repair associated
STAT5A	-0.29445	-0.496705	-0.459463	-0.636005	-0.456879	-0.638835	-0.732118	-0.796428	-0.541149	-0.727388	-0.817938	-0.59976	STAT5A	17q21.2	signal transducer and activator of transcription 5A
MRPL38	-0.567656	-0.702755	-0.322145	-0.189659	-0.600134	-0.765384	-0.769366	-0.923396	-0.860764	-0.23327	-0.646834	-0.598306	MRPL38	17q25.1	mitochondrial ribosomal protein L38
UTP18	-0.810701	-0.759298	-0.539239	-0.629038	-0.694134	-0.679038	-0.676246	-0.511949	-0.619515	-0.493721	-0.0542856	-0.587924	UTP18	17q21.33	UTP18, small subunit processome component
SRP68	-0.644483	-0.755315	-0.677464	-0.343809	-0.619793	-0.697373	-0.576938	-0.483564	-0.665532	-0.498211	-0.485588	-0.586188	SRP68	17q25.1	signal recognition particle 68
EPN3	-0.560679	-0.422146	-0.63507	-0.466024	-0.468241	-0.509778	-0.594699	-0.731182	-0.632264	-0.549162	-0.695039	-0.56948	EPN3	17q21.33	epsin 3
COASY	-0.305759	-0.657971	-0.721656	-0.498994	-0.397361	-0.715958	-0.51725	-0.655786	-0.783175	-0.397519	-0.561333	-0.564796	COASY	17q21.2	Coenzyme A synthase
MRPS7	-0.514288	-0.744762	-0.350392	-0.289146	-0.599065	-0.626594	-0.598074	-0.685542	-0.711401	-0.426907	-0.615667	-0.560167	MRPS7	17q25.1	mitochondrial ribosomal protein S7
SLC25A10	-0.313029	-0.489447	-0.444434	-0.543888	-0.580521	-0.640996	-0.812434	-0.627927	-0.479011	-0.573091	-0.634643	-0.558129	SLC25A10	17q25.3	solute carrier family 25 member 10
PPY	-0.558374	-0.525015	-0.566023	-0.302682	-0.471649	-0.572412	-0.702011	-0.671064	-0.55459	-0.557103	-0.472935	-0.54126	PPY	17q21.31	pancreatic polypeptide
RAC3	-0.449105	-0.617148	-0.352727	-0.455332	-0.556001	-0.641387	-0.669613	-0.64643	-0.41004	-0.371727	-0.774067	-0.540325	RAC3	17q25.3	Rac family small GTPase 3
TEN1	-0.560029	-0.514619	-0.863313	-0.373208	-0.635099	-0.66804	-0.2647	-0.65081	-0.577776	-0.43556	-0.388098	-0.539205	TEN1	17q25.1	TEN1, CST complex subunit
LRRC37A3	-0.395764	-0.468349	-0.605031	-0.483481	-0.545632	-0.533582	-0.517516	-0.379971	-0.580223	-0.630699	-0.629855	-0.524555	LRRC37A3	17q24.1	leucine rich repeat containing 37 member A3
SLC35B1	-0.690962	-0.574336	-0.59155	-0.24363	-0.739589	-0.581516	-0.625622	-0.415246	-0.532749	-0.374937	-0.3899	-0.52364	SLC35B1	17q21.33	solute carrier family 35 member B1
AATF	-0.575762	-0.59057	-0.38236	-0.456293	-0.50159	-0.548712	-0.641296	-0.469919	-0.671878	-0.283694	-0.627608	-0.522698	AATF	17q12	apoptosis antagonizing transcription factor
NDUFA8	-0.306931	-0.637751	-0.297967	-0.146438	-0.685025	-0.7579	-0.620162	-0.75969	-0.767042	-0.38015	-0.385447	-0.522228	NDUFAF8	17q25.3	NADH:ubiquinone oxidoreductase complex assembly factor 8
KLHL11	-0.409435	-0.513512	-0.49476	-0.389917	-0.664818	-0.618118	-0.641217	-0.429255	-0.432626	-0.557179	-0.539818	-0.517332	KLHL11	17q21.2	kelch like family member 11
NPB	-0.390481	-0.583483	-0.321137	-0.399272	-0.565074	-0.519822	-0.723234	-0.613819	-0.329969	-0.432155	-0.755159	-0.512146	NPB	17q25.3	neuropeptide B
NPEPPS	-0.366641	-0.598681	-0.308225	-0.650658	-0.528922	-0.359631	-0.509309	-0.577133	-0.533766	-0.712477	-0.482987	-0.511675	NPEPPS	17q21.32	aminopeptidase puromycin sensitive
RAD51C	-0.550487	-0.544557	-0.487488	-0.257494	-0.325199	-0.577579	-0.573222	-0.682152	-0.486441	-0.426725	-0.593329	-0.500425	RAD51C	17q22	RAD51 paralog C
ARL4D	-0.378638	-0.606387	-0.34135	-0.386312	-0.582221	-0.292634	-0.619754	-0.554274	-0.480053	-0.602955	-0.643937	-0.498956	ARL4D	17q21.31	ADP ribosylation factor like GTPase 4D
COX11	-0.262236	-0.563545	-0.358779	-0.334157	-0.388986	-0.411314	-0.611379	-0.957931	-0.435888	-0.365612	-0.797419	-0.49884	COX11	17q22	cytochrome c oxidase copper chaperone COX11
LSM12	-0.279298	-0.38921	-0.46139	-0.352845	-0.497446	-0.513685	-0.5976	-1.00027	-0.504482	-0.391711	-0.476158	-0.496736	LSM12	17q21.31	LSM12 homolog
METTL23	-0.472764	-0.366914	-0.237721	-0.405834	-0.530343	-0.45339	-0.628994	-0.774115	-0.444927	-0.475228	-0.635224	-0.493223	METTL23	17q25.1	methyltransferase like 23
POLG2	-0.45212	-0.511298	-0.311466	-0.386153	-0.481027	-0.461029	-0.385256	-0.892193	-0.576641	-0.471783	-0.490803	-0.492706	POLG2	17q23.3	DNA polymerase gamma 2, accessory subunit
HGS	-0.566605	-0.668562	-0.508254	-0.386227	-0.551323	-0.404855	-0.487	-0.530671	-0.48161	-0.456416	-0.359386	-0.490992	HGS	17q25.3	hepatocyte growth factor-regulated tyrosine kinase substrate
GSDMA	-0.320353	-0.52684	-0.412958	-0.524835	-0.376393	-0.49096	-0.634862	-0.529888	-0.47246	-0.631679	-0.443881	-0.487737	GSDMA	17q21.1	gasdermin A
DDX5	-0.799473	-0.349282	-0.156576	-0.48474	-0.439515	-0.569702	-0.554109	-0.465267	-0.530599	-0.474233	-0.479761	-0.482114	DDX5	17q23.3	DEAD-box helicase 5
DDX52	-0.645177	-0.472728	-0.292299	-0.265699	-0.500005	-0.439006	-0.613898	-0.552433	-0.627689	-0.344615	-0.54307	-0.481511	DDX52	17q12	DExD-box helicase 52
LRRC37B	-0.45505	-0.419036	-0.493508	-0.399581	-0.496061	-0.438436	-0.535656	-0.469187	-0.401248	-0.679123	-0.463706	-0.477327	LRRC37B	17q11.2	leucine rich repeat containing 37B
EXOC7	-0.451594	-0.556176	-0.575094	-0.467625	-0.419179	-0.525198	-0.472476	-0.281876	-0.526332	-0.603266	-0.341568	-0.47458	EXOC7	17q25.1	exocyst complex component 7
KRT10	-0.350102	-0.52195	-0.532222	-0.342221	-0.434308	-0.461756	-0.641371	-0.400908	-0.427488	-0.57185	-0.507782	-0.471996	KRT10	17q21.2	keratin 10
TBC1D3B	-0.431744	-0.535952	-0.391199	-0.200359	-0.587094	-0.587118	-0.60292	-0.556367	-0.542576	-0.527178	-0.0663648	-0.45717	TBC1D3B	17q12	TBC1 domain family member 3B
SMG8	-0.348989	-0.461197	-0.336719	-0.334797	-0.40957	-0.386133	-0.537195	-0.608639	-0.463542	-0.534166	-0.594558	-0.455955	SMG8	17q22	SMG8, nonsense mediated mRNA decay factor
CSH2	-0.162418	-0.45389	-0.253664	-0.288435	-0.610896	-0.399076	-0.515787	-0.705564	-0.527197	-0.509338	-0.558504	-0.453161	CSH2	17q23.3	chorionic somatomammotropin hormone 2
TUBD1	-0.66123	-0.586725	-0.446174	-0.414679	-0.530999	-0.344063	-0.502647	-0.406228	-0.444849	-0.28642	-0.342495	-0.451501	TUBD1	17q23.1	tubulin delta 1
UBE2O	-0.300378	-0.463652	-0.306802	-0.427611	-0.573855	-0.51141	-0.554005	-0.728131	-0.339826	-0.550749	-0.192292	-0.449883	UBE2O	17q25.1	ubiquitin conjugating enzyme E2 O
ALYREF	-0.498045	-0.636833	-0.387412	-0.237091	-0.439123	-0.437805	-0.29177	-0.356764	-0.603364	-0.544359	-0.474207	-0.44607	ALYREF	17q25.3	Aly/REF export factor
JMJD6	-0.148981	-0.524305	-0.412316	-0.306947	-0.486192	-0.359416	-0.496825	-0.748146	-0.283542	-0.576317	-0.531841	-0.443166	JMJD6	17q25.1	jumonji domain containing 6, arginine demethylase and lysine hydroxylase
INTS2	-0.566468	-0.595964	-0.452605	-0.651446	-0.484155	-0.301475	-0.380254	-0.27815	-0.579215	-0.276328	-0.270708	-0.439706	INTS2	17q23.2	integrator complex subunit 2
ERAL1	-0.503132	-0.622525	-0.160988	-0.0835124	-0.396569	-0.415422	-0.526158	-0.853869	-0.633514	-0.119272	-0.4997	-0.437696	ERAL1	17q11.2	Era like 12S mitochondrial rRNA chaperone 1
SUPT4H1	-0.566166	-0.751583	-0.418239	-0.315452	-0.415105	-0.340871	-0.158137	-0.62651	-0.382074	-0.44493	-0.391609	-0.437334	SUPT4H1	17q22	SPT4 homolog, DSIF elongation factor subunit
KANSL1	-0.489769	-0.562679	-0.499451	-0.453613	-0.179367	-0.537933	-0.473056	-0.487373	-0.393038	-0.326176	-0.340871	-0.431211	KANSL1	17q21.31	KAT8 regulatory NSL complex subunit 1
CBX1	-0.30302	-0.507434	-0.401247	-0.343945	-0.362106	-0.502679	-0.552904	-0.405994	-0.369516	-0.435216	-0.53985	-0.429446	CBX1	17q21.32	chromobox 1
SLC16A5	-0.26753	-0.453408	-0.461615	-0.3602	-0.498506	-0.51331	-0.600481	-0.291655	-0.244123	-0.445011	-0.508761	-0.422236	SLC16A5	17q25.1	solute carrier family 16 member 5
BRIP1	-0.292556	-0.335943	-0.297656	-0.21558	-0.605823	-0.496823	-0.606467	-0.455867	-0.395194	-0.332635	-0.608144	-0.422063	BRIP1	17q23.2	BRCA1 interacting protein C-terminal helicase 1
PPM1E	-0.291767	-0.251861	-0.484821	-0.472716	-0.450448	-0.423965	-0.341583	-0.52665	-0.38275	-0.602693	-0.401256	-0.420955	PPM1E	17q22	protein phosphatase, Mg2+/Mn2+ dependent 1E
C17orf58	-0.16763	-0.279378	-0.402586	-0.405925	-0.662041	-0.519495	-0.582025	-0.385276	-0.212541	-0.367667	-0.643272	-0.420712	C17orf58	17q24.2	chromosome 17 open reading frame 58
ATP5G1	-0.224335	-0.398903	-0.293193	-0.433417	-0.431974	-0.430636	-0.548917	-0.388694	-0.272038	-0.568673	-0.540799	-0.411962	ATP5G1	17q21.32	ATP synthase, H+ transporting, mitochondrial Fo complex subunit C1 (subunit 9)
UTP6	-0.716111	-0.357112	-0.371801	-0.0853772	-0.187126	-0.43455	-0.401692	-0.243648	-0.344873	-0.0809006	-1.29592	-0.410828	UTP6	17q11.2	UTP6, small subunit processome component
FTSJ3	-0.645242	-0.592288	-0.350223	-0.103341	-0.427942	-0.284878	-0.390781	-0.536634	-0.506006	-0.247555	-0.430583	-0.410498	FTSJ3	17q23.3	FtsJ homolog 3
COG1	-0.213447	-0.365668	-0.392304	-0.276538	-0.465612	-0.398754	-0.365668	-0.451489	-0.61618	-0.348452	-0.619386	-0.410318	COG1	17q25.1	component of oligomeric golgi complex 1
TADA2A	-0.335977	-0.405742	-0.395045	-0.305148	-0.522618	-0.300143	-0.47218	-0.532935	-0.533888	-0.528264	-0.171663	-0.409419	TADA2A	17q12	transcriptional adaptor 2A
