# Supplementary material for: Metabolic reprogramming of cancer cells by JMJD6-mediated pre-mRNA splicing associated with therapeutic response to splicing inhibitor
Source: eLife journal article supplement (doi:10.7554/elife.90993), 2023-11-01
Supplement: data1 [file Figure 2 Data source.xlsx]

## Sheet: Figure 2D
days	shGFP(mm3)					shJMJD6#46(mm3)					shJMJD6#47(mm3)
0	22.4493	0	0	0	0	0	0	0	0	0	0	0	0	0
23	22.4493	0	0	0	0	0	0	0	0	0	0	0	0	0
26	113.098	0	0	0	0	0	0	0	0	0	0	0	0	0
33	321.556	0	0	0	0	0	0	0	0	0	0	0	0	0
40	321.556	220.894	1436.76	14.1372	0	0	0	0	0	0	0	0	0	0
43	2246.78	523.6	99.5413	143.794	606.132	0	0	0	0	0	0	0	0	0
46	4000	350.771	606.133	962.516	1436.76	0	0	0	0	0	0	0	0	0

## Sheet: Figure 2E
days	shGFP (mm3)					shJMJD6 #46(mm3)					shJMJD6#47(mm3)
0	0	0	0	0	0	0	0	0	0	0	0	0	0	0	0
1	0	0	0	0	0	0	0	0	0	0	0	0	0	0	0
5	0	0	0	0	0	0	0	0	0	0	0	0	0	0	0
8	0	0	0	0	0	0	0	0	0	0	0	0	0	0	0
11	161.031	0	0	0	0	0	0	0	0	0	0	0	0	0	0
14	350.771	0	0	0	0	0	0	0	0	0	0	0	0	0	0
15	623.616	0	0	0	0	0	0	0	0	0	0	0	0	0	0
18	1573.25	1075.07	207.479	236.72	0	0	0	0	0	0	0	0	0	0	0
20	1370.08	2903.48	943.781	374.749	0	0	0	0	0	0	0	0	0	0	0
21	3000	2620.41	516.563	502.679	130.925	0	0	0	0	0	0	0	0	0	0
23	3000	3000	711.264	230.302	893.518	0	0	0	0	0	0	0	0	0	0
29	3000	3000	2395.1	1118.21	2500	0	0	0	0	0	0	45.9849	0	101.107	0
32						0	0	0	0	0	0	204.947	0	274.671	0
35						0	0	0	0	0	0	2401.6	0	579.684	0
39						0	0	0	0	0	0	1213.87	0	2352.08	0
42						0	0	0	0	0	0	2088.86	0		522.031
47						0	0	0	0	0	0	2500	0		2354.22

## Sheet: Figure 2G
days	JoMa GFP			JoMa N-MYC			JoMa JMJD6			JoMa JMJD6+ N-MYC
0	200	200	200	200	200	200	200	200	200	200	200	200
3	950	1170	960	780	920	1070	1100	1320	1150	11890	9750	1700
6	3750	3100	4200	2850	3400	3100	4700	4930	4520	62500	67300	65700

## Sheet: Figure 2I
Day0	GFP					MYCN					JMJD6					MYCN + JMJD6
0	0	0	0	0	0	0	0	0	0	0	0	0	0	0	0	0	0	0	0	0
21	0	0	0	0	0	0	0	8.18125	233.496	157.48	0	0	0	0	0	229.394	0	0	70.2764	111.41
23	0	0	0	0	0	0	397.177	156.424	666.941	958.984	0	0	0	0	0	1324.37	190.587	728.745	1103.22	1038.69
26	0	0	143.794	0	0	0	652.284	209.179	936.819	960.161	0	0	0	0	0	3120.28	238.111	1611.17	1497.63	1105.81
28	0	0	210.888	0	201.188	0	0	311.449	1380.55	1619.49	0	0	0	123.585	0	3870.49	360.48	1978.26	2152.72	1535.94
30	0	237.646	298.847	0	179.595	272.633	0	500.39	1347.84	1880.83	0	0	0	440.469	124.789	4974.82	525.96	2347.8	2680.61	1891.91
32	206.211	272.125	123.585	0	228.942	498.867	161.39	523.6	1733.79	1827.92	172.007	0	0	129.992	126.609	4922.16	668.789	2763.1	3412.95	3304.5
