# Supplementary material for: Metabolic reprogramming of cancer cells by JMJD6-mediated pre-mRNA splicing associated with therapeutic response to splicing inhibitor
Source: eLife journal article supplement (doi:10.7554/elife.90993), 2023-11-01

Figure 2—supplement 1

<https://hgserver1.amc.nl/cgi-bin/r2/main.cgi>

Dataset: [GSE45547](http://www.ncbi.nlm.nih.gov/geo/query/acc.cgi?acc=GSE45547)


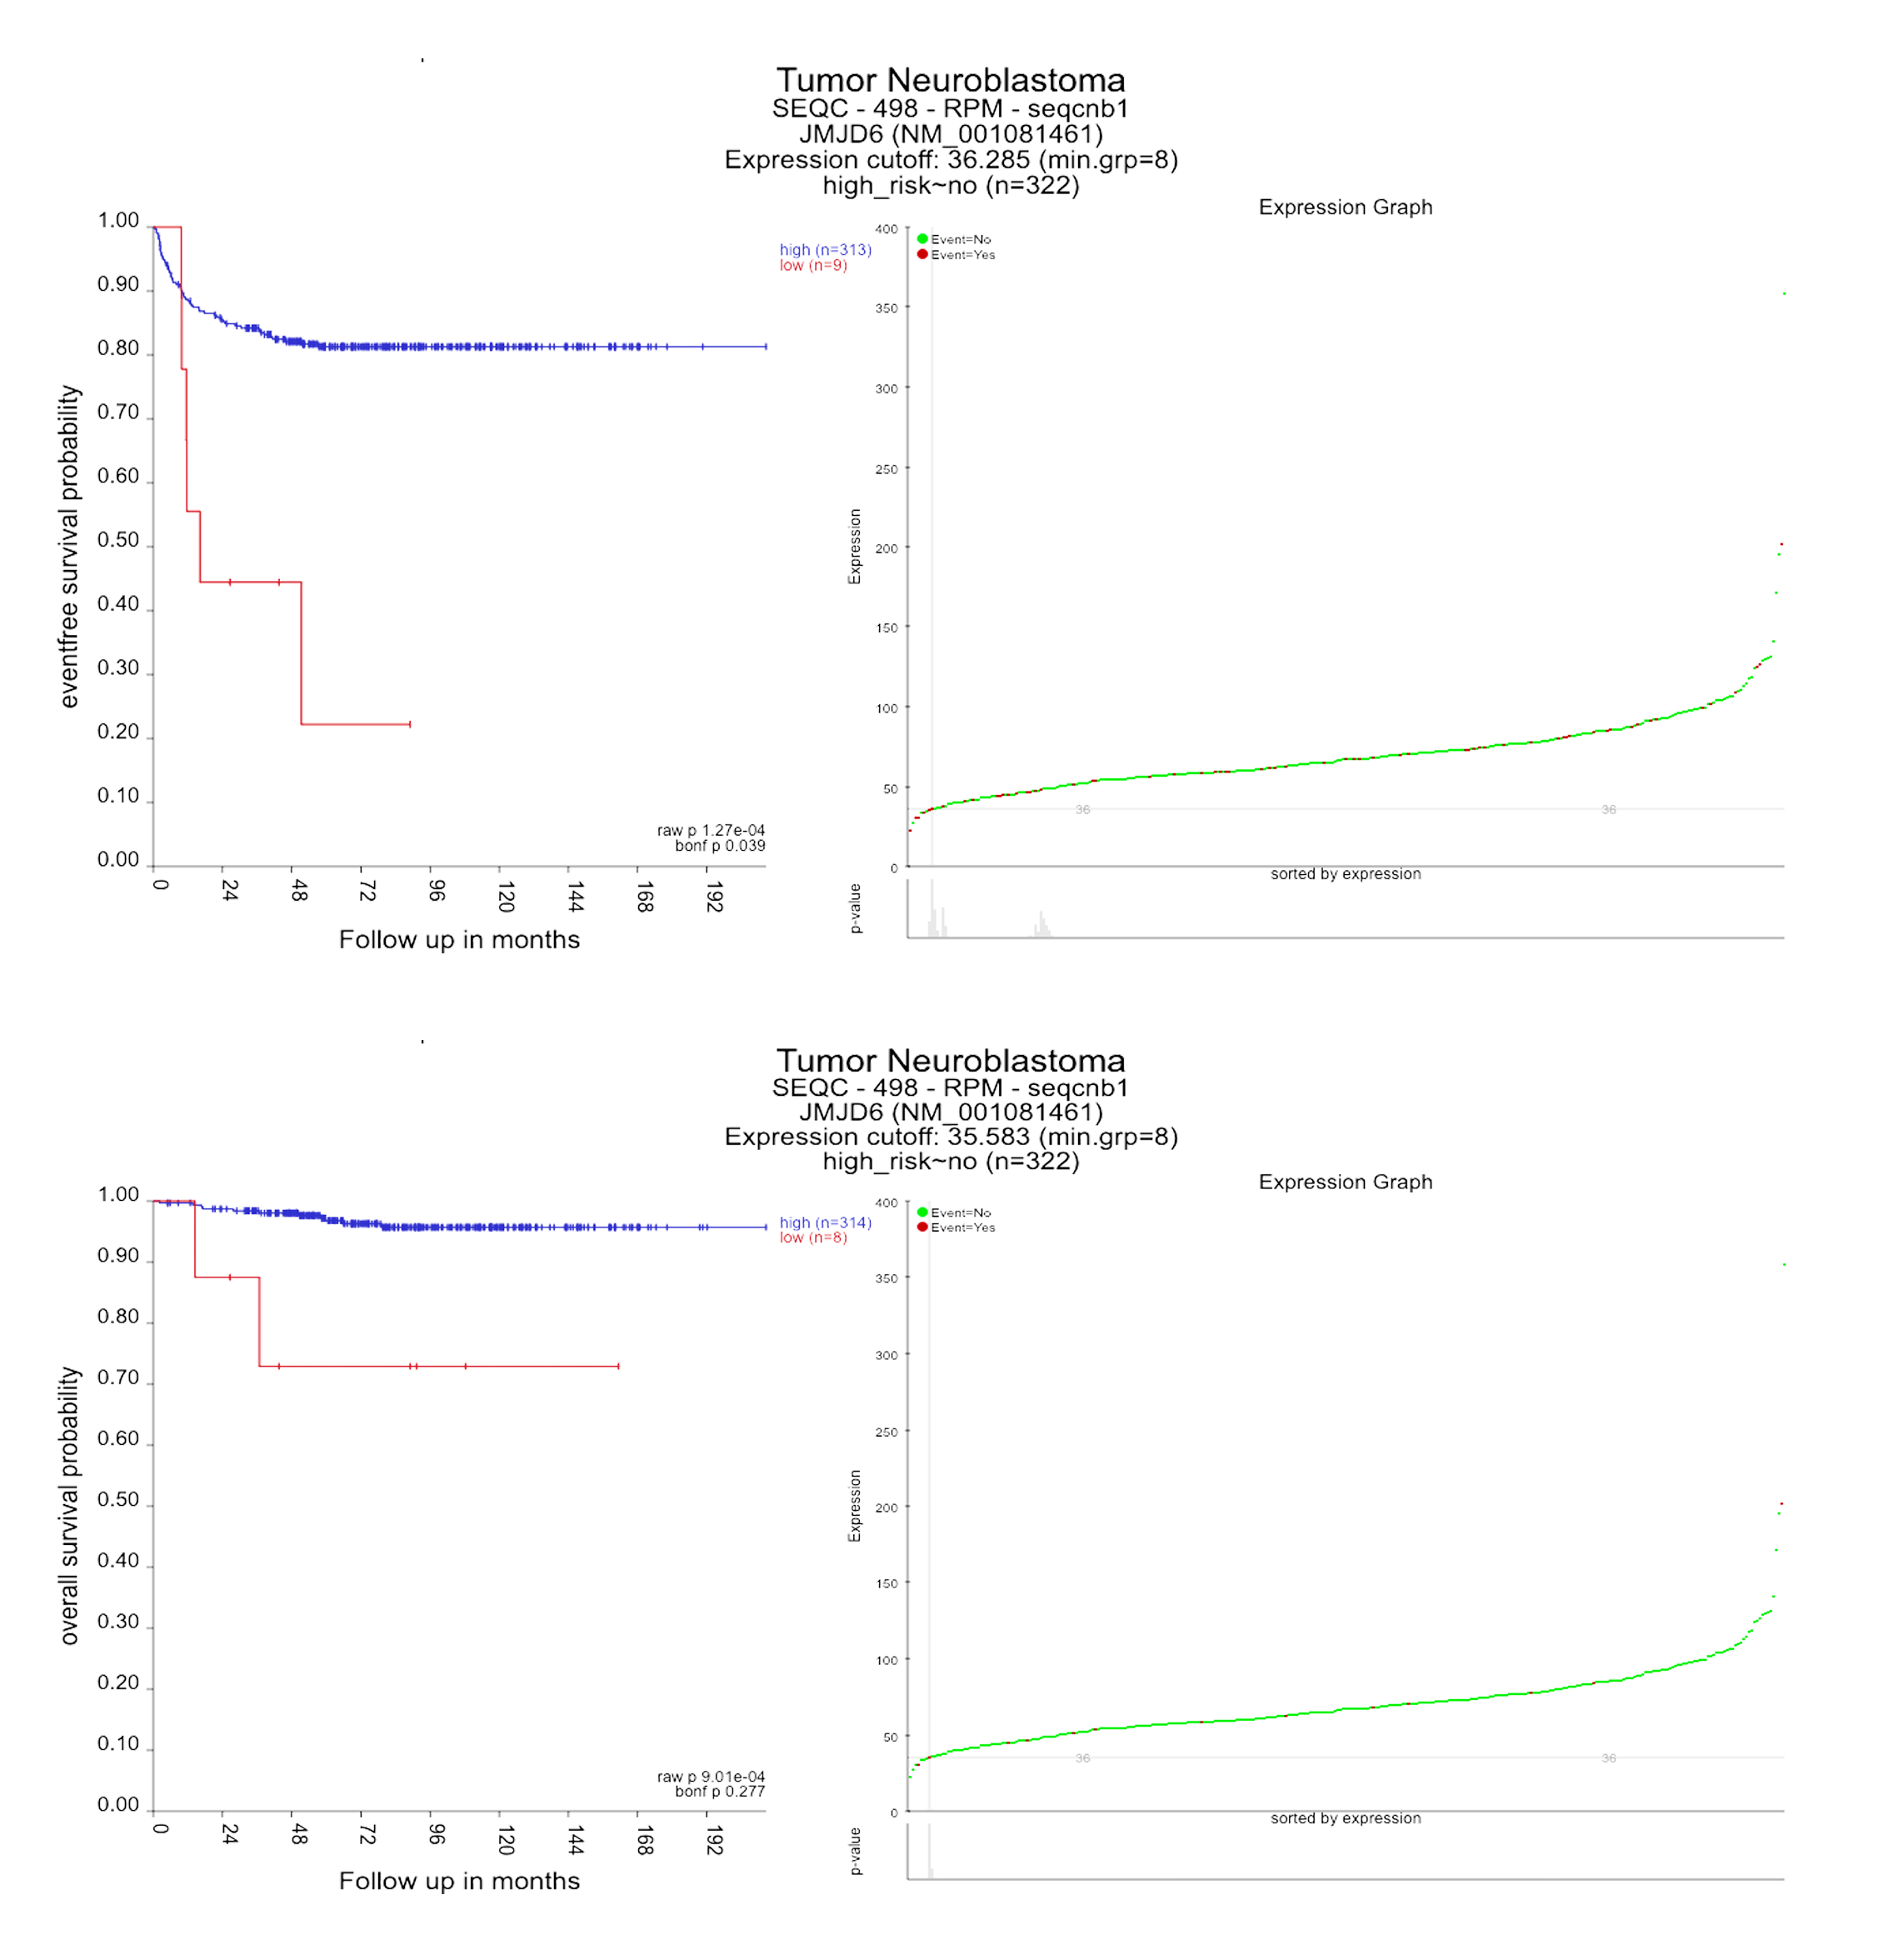


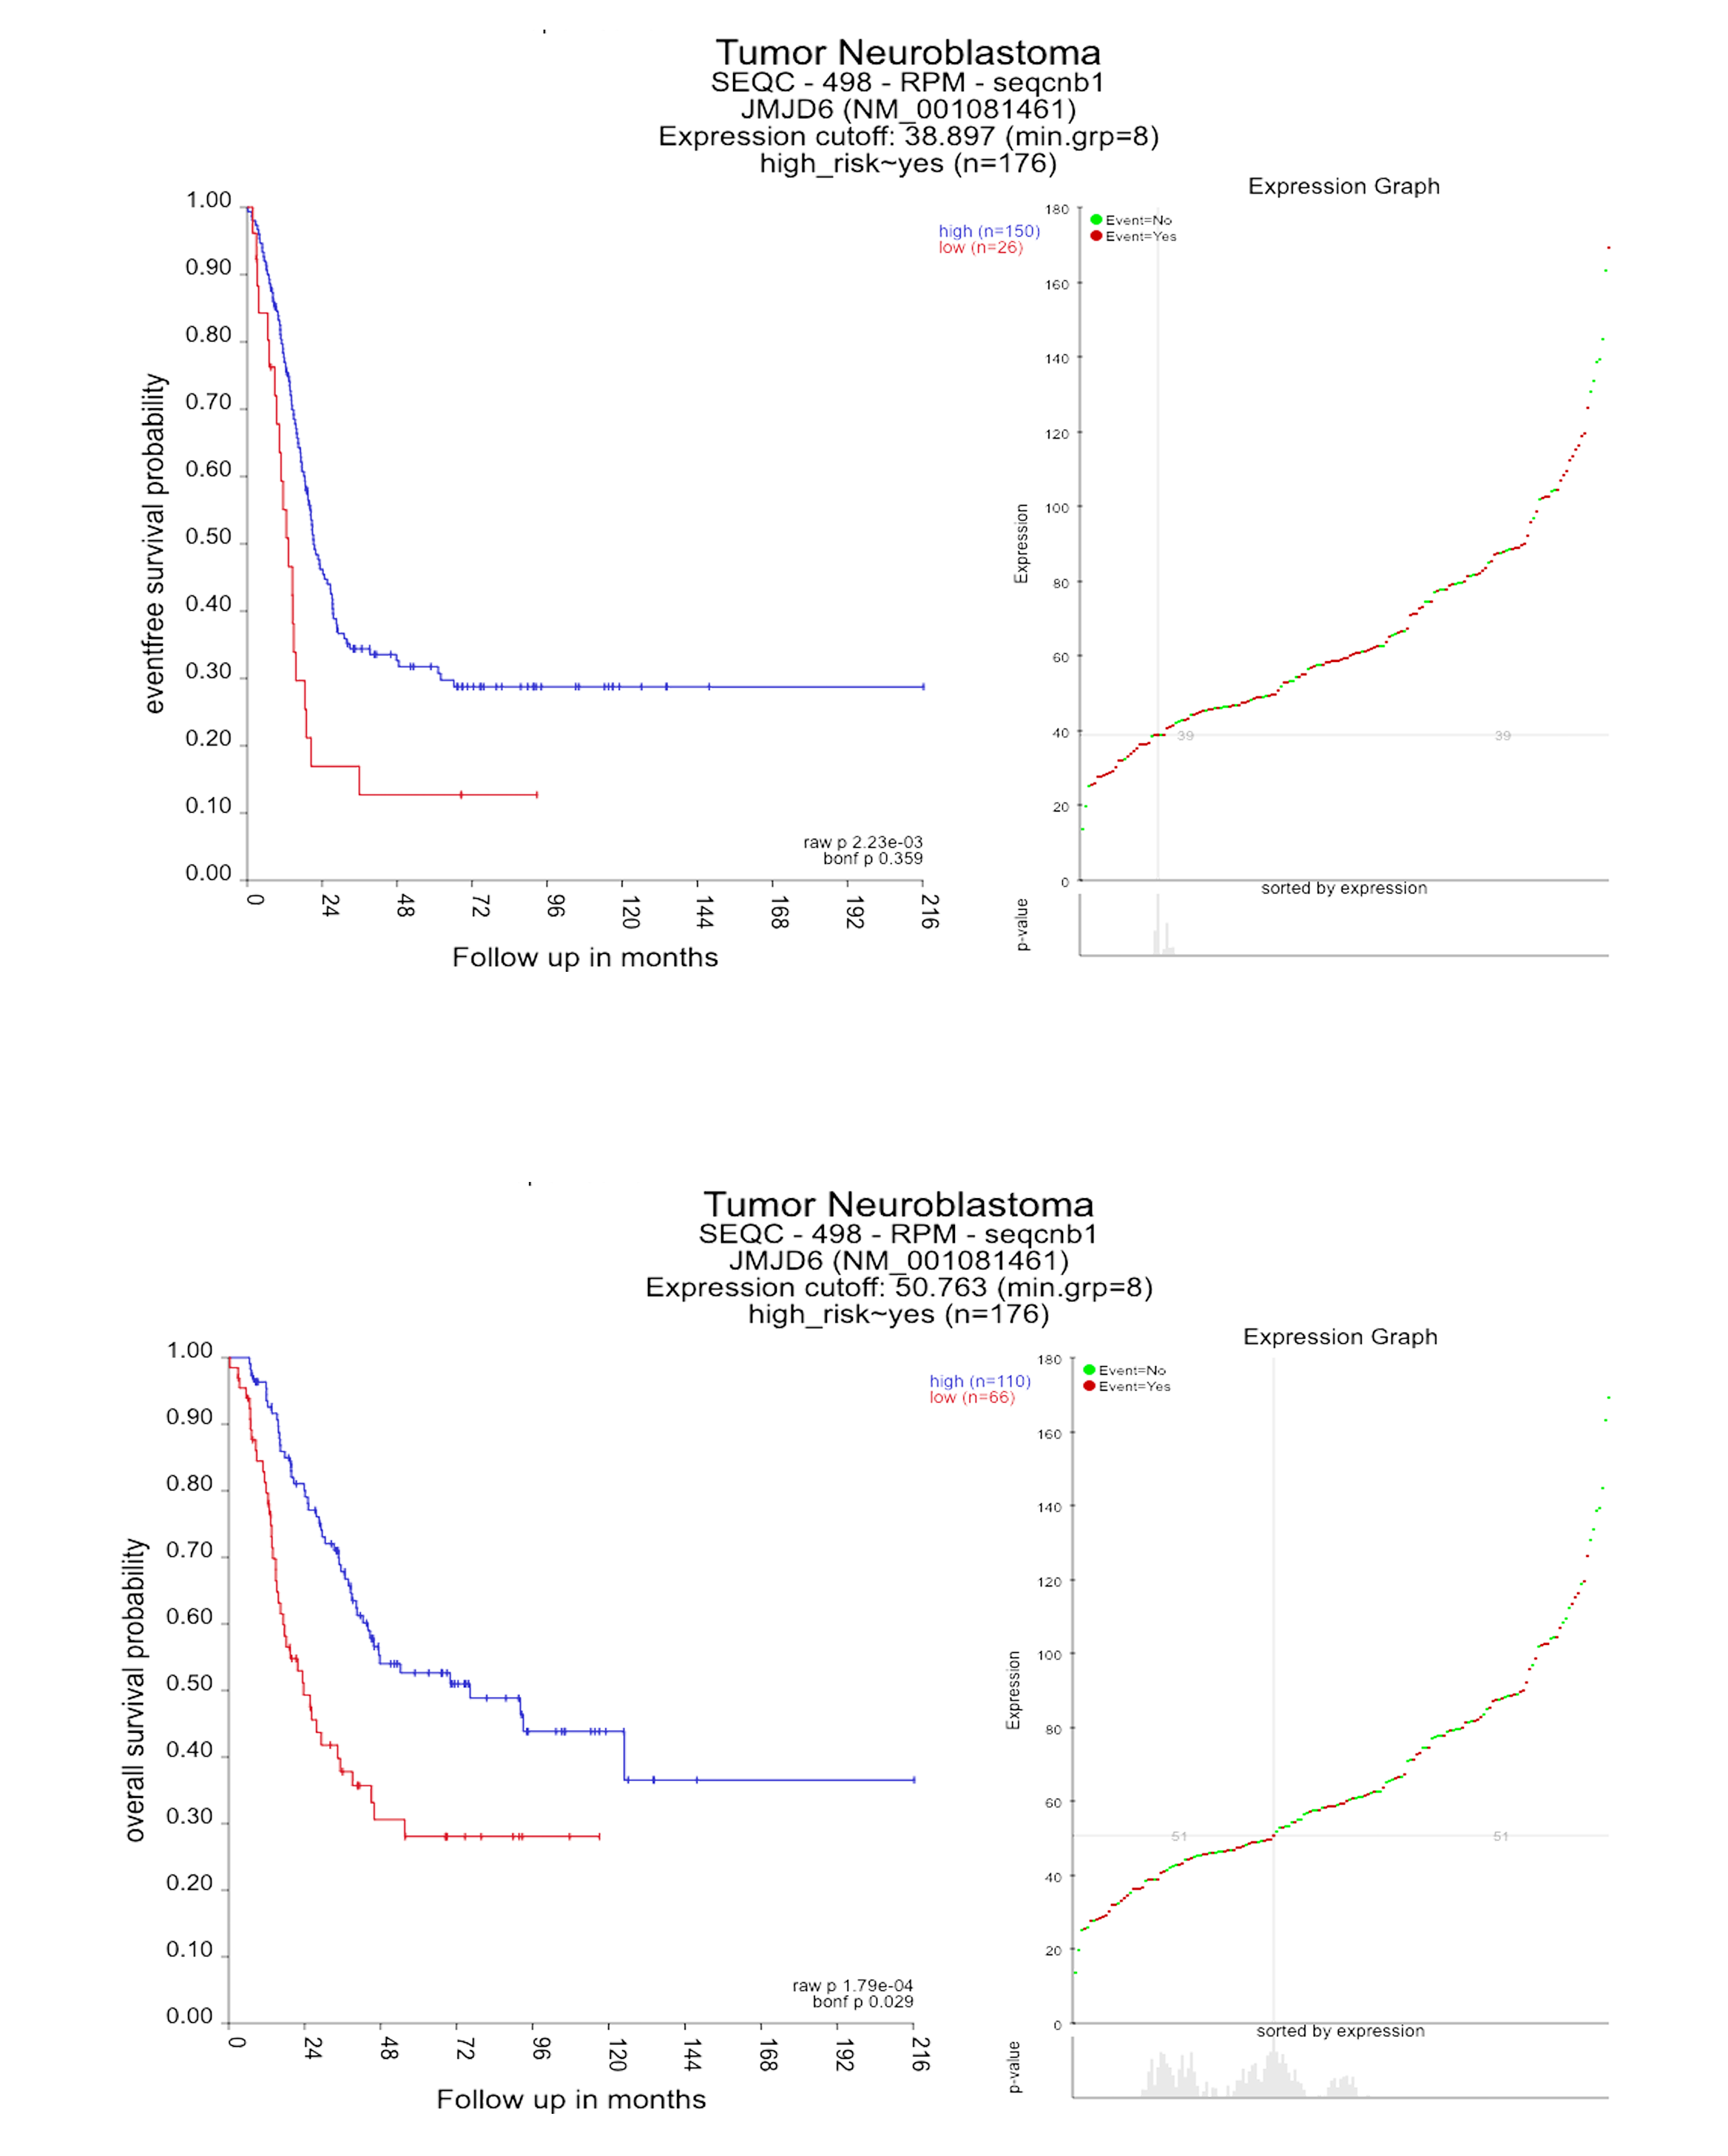

Supplement: data1 [file Figure 2-supplement 1-data source.docx]
