# Supplementary material for: Metabolic reprogramming of cancer cells by JMJD6-mediated pre-mRNA splicing associated with therapeutic response to splicing inhibitor
Source: eLife journal article supplement (doi:10.7554/elife.90993), 2023-11-01
Supplement: data1 [file Figure 2-Supplement 2C-data source.xlsx]

## Sheet: Sheet1
AML	BALL	CNS-other	CPC	Cranio	EPD	EWS	HGG	LGG	MB	MEL	MLL	MPAL	NBL	OS	RB	RHB	ST-Other	TALL	WLM
32.0416	83.4179	8.194	9.63648	8.058	9.50301	5.457	43.2053	11.0213	17.156	5.53869	15.8981	25.291	50.513	20.0421	9.902	23.5657	9.441	48.91	10.066
30.1851	54.986	7.159	8.45223	5.414	7.6073	4.241	42.3526	10.3872	14.2559	5.40075	10.283	19.167	40.5084	14.8416	9.556	13.613	8.25	34.2787	8.1439
30.131	54.0906	5.658	6.32271	4.014	6.89818	3.583	41.8957	9.58725	14.2281	5.26848	7.56707	12.717	39.1366	14.0108	9.034	10.7609	6.848	31.997	7.7068
28.8752	49.6017	4.627	6.09864	3.685	6.73429	2.233	41.5331	9.42248	13.247	5.00943	7.48056	9.765	30.4274	13.1151	9.034	10.4652	6.486	29.5435	6.7939
26.031	49.4271	4.593	4.4841	2.993	6.29586	2.052	38.1752	8.39538	12.576	3.48621	6.14198	6.122	28.3278	12.7889	8.595	10.4102	6.155	29.3123	6.6677
25.1111	47.5181	4.167	4.26064	2.453	6.22934		37.756	8.36	12.456	3.34694	5.80233		28.1978	12.6871	8.37618	9.69097	5.969	27.8042	6.0464
24.2235	43.4272	3.822	3.71973		5.48354		36.2153	7.26419	11.974	2.59636	5.50043		27.6081	12.0857	8.30798	9.30064	5.053	27.6316	5.472
23.7052	43.3841	3.66	3.70433		5.387		26.744	6.70885	10.8578	1.85202	4.80477		27.2586	12.049	8.241	9.168	4.819	27.3696	5.4319
23.3608	42.6862	3.167	3.70052		5.32756		26.435	6.60324	10.3614		4.35741		27.0192	11.6475	8.124	8.84014	4.686	24.9878	5.429
23.0983	41.8957	2.586	3.66567		5.311		23.6917	6.54522	9.912		4.16687		26.4445	11.6285	7.066	8.04596	4.553	24.9614	5.2654
22.3701	41.4557		3.64734		5.2115		20.8784	6.5386	9.81		4.11009		26.2813	11.4722	6.5169	7.7559	3.918	22.7192	5.1757
21.9876	40.4754		3.38191		5.18453		17.9818	6.48585	9.78205		4.08411		26.0569	11.2039	6.102	7.64039	3.396	22.1837	5.1686
21.8591	40.3108		3.34798		5.132		17.7463	6.3148	9.341		4.02654		26.0423	11.0927	6.036	7.45934	3.35	21.5291	5.0732
21.6673	38.2745		3.33481		5.12034		17.7187	6.29586	8.90033		3.99713		25.8215	10.617	5.946	6.61468	3.261	21.2965	4.8887
21.386	37.6517		3.33075		4.92104		17.6518	6.168	7.764		3.95583		25.8115	10.5184	5.521	6.50045	3.237	20.5318	4.8057
21.1994	37.5381		3.2489		4.77927		17.315	5.99437	7.685		3.84192		24.6392	10.2371	5.194	6.26196	2.777	20.001	4.7624
20.767	37.4482		2.79939		4.61769		15.2958	5.8972	7.483		3.83975		24.0115	10.1513	5.089	6.13121	2.772	19.8716	4.6786
20.4274	37.1372		2.72877		4.57271		13.5161	5.87464	6.65		3.7965		23.918	9.9778	4.859	6.02487	2.656	19.5663	4.595
20.3412	37.0107		2.68133		4.49714		13.2472	5.78141	6.18857		3.50324		23.4554	9.90965	4.72477	5.99276	2.369	19.5132	4.5134
20.0278	36.3009		2.62747		4.46733		12.7564	5.75062	6.059		3.47795		23.4293	9.725	4.508	5.793	2.172	19.5073	4.4895
19.9949	35.7947		2.44679		4.45433		11.4956	5.67202	5.946		3.39363		23.286	9.4479		5.72136	2.079	19.4743	4.3735
19.7259	35.7114		2.31917		4.40025		11.3584	5.41341	5.84363		3.38752		23.2374	9.4305		5.69947		18.7909	4.2602
19.4929	35.6481		2.03947		4.34781		10.498	5.271	5.53444		3.3439		23.0633	9.3899		5.477		18.7507	4.2105
19.1717	35.563		1.92561		4.33257		9.49044	5.26305	5.258		3.05034		22.7772	9.099		5.41068		18.6311	4.2047
18.895	35.4284		1.70231		4.28662		9.31309	5.22357	4.92		2.73113		22.577	9.0881		5.0942		18.5986	4.1476
18.6143	34.9711		1.21877		4.266		9.0371	5.211	4.452				22.4694	8.9588		4.93022		18.4538	4.147
18.228	33.9637				4.12243		8.86788	5.14271	3.553				22.3326	8.9234		4.82523		18.366	4.1127
18.1602	33.7888				3.80421		8.69566	5.105	3.149				22.2828	8.5582		4.31536		18.2632	4.103
17.6654	33.7198				3.7325		8.6019	5.085	3.128				22.1765	8.3775		4.26476		18.0482	4.0772
17.6654	32.9969				3.69525		8.43691	5.00434					22.133	8.36		3.78237		18.0136	3.9951
17.6474	32.7979				3.67311		8.03336	5.00172					22.0719	8.3161		3.71602		17.9079	3.935
17.5925	32.309				3.65915		7.491	4.99011					20.7652	8.2814		3.65802		17.6549	3.9263
17.124	31.9565				3.62716		7.27339	4.911					20.7339	8.0611		3.64625		17.609	3.9193
16.9766	31.9142				3.599		6.96117	4.79009					20.6247	8.0585		3.64412		17.5309	3.8507
16.8553	31.5303				3.49896		6.707	4.789					20.5961	8.0204		3.56054		17.4732	3.8439
16.801	31.4048				3.47025		6.64481	4.78814					20.53	8.0073		3.55738		17.3594	3.8419
16.5627	31.0934				3.43793		6.3773	4.71215					20.3294	7.9911		3.48206		17.3511	3.7697
16.5089	30.8326				3.43585		6.30684	4.69988					20.2597	7.97163		3.43164		17.0611	3.7621
16.4884	30.8019				3.38033		6.28777	4.67397					20.0254	7.8949		3.41831		17.0007	3.7599
16.4736	30.6517				3.33784		6.18696	4.66897					19.909	7.865		3.11864		16.8008	3.7287
16.0095	30.593				3.33481		6.092	4.58129					19.6329	7.797		3.04649		16.5064	3.6534
15.9928	29.8798				3.33379		6.05761	4.54829					19.5155	7.7056		3.02549		15.9548	3.6245
15.8489	29.1384				3.252		5.96102	4.50435					19.428	7.56905		2.80132		15.8117	3.623
15.8054	29.0332				3.24088		5.78296	4.397					19.3571	7.563		2.73346		15.8079	3.6199
15.7169	28.6995				3.23602		5.651	4.36926					19.3405	7.3869		2.67218		15.7102	3.5889
15.4292	28.5798				3.198		5.62361	4.32377					19.0188	7.1405		2.55502		15.588	3.5705
15.3729	28.4129				3.175		5.62288	4.25291					18.9242	7.1173		2.503		15.3665	3.5409
15.3529	28.406				3.12013		5.59414	4.24108					18.8328	7.0081		2.42096		15.325	3.5284
15.234	28.2155				3.0765		5.53312	4.21431					18.7239	6.631		2.24115		15.3167	3.5175
15.1029	28.0804				3.0427		5.449	4.21305					18.6482	6.5488		2.08462		15.0997	3.5037
15.0072	28.009				2.97867		5.28492	4.20603					18.1954	6.53		1.9467		14.9973	3.4915
14.9436	27.9744				2.93155		5.15078	4.15081					18.1841	6.4805		1.74632		14.7664	3.4667
14.9082	27.7567				2.91259		5.13474	4.14738					18.1	6.46636				14.6344	3.427
14.7361	27.7567				2.88149		4.9823	4.052					18.0498	6.4335				14.6247	3.3803
14.7207	27.7082				2.81		4.96803	4.03882					18.0219	6.4195				14.6183	3.341
14.4587	27.5801				2.79375		4.93544	3.94229					17.9094	6.406				14.5763	3.328
14.4208	27.485				2.766		4.87004	3.939					17.2501	6.3621				14.5476	3.3226
14.3358	27.4072				2.68504		4.724	3.92796					17.1976	6.3412				14.5448	3.2986
14.2559	26.9636				2.64872		4.69875	3.89565					16.9939	6.3276				14.4227	3.265
14.237	26.6851				2.584		4.6863	3.86981					16.7125	6.1879				14.3757	3.2076
13.8412	26.5963				2.49923		4.645	3.85521					16.7025	6.1703				14.3624	3.2057
13.7709	26.4645				2.44806		4.55194	3.821					16.6228	6.1467				14.3048	3.1915
13.5246	26.4071				2.42527		4.46857	3.79324					16.5963	6.1021				14.286	3.1794
13.3644	26.4071				2.37676		4.45433	3.73894					16.3991	6.07568				14.065	3.156
13.2877	26.0659				2.36972		4.441	3.70692					16.3524	6.0592				13.9899	3.1543
13.2431	26.0231				2.36383		4.34306	3.70163					16.3217	5.9704				13.9669	3.1349
13.1518	25.843				2.32208		4.325	3.682					16.1078	5.7883				13.5402	3.1297
13.1388	25.5945				2.272		4.29013	3.5849					16.0732	5.6555				13.5016	3.1262
13.0967	25.4154				2.19462		4.27844	3.52186					16.0078	5.596				13.4086	3.1194
13.0881	25.3267				2.09437		4.26005	3.46247					15.8406	5.5409				13.2065	3.11
13.0386	24.8827				2.07606		4.16797	3.45626					15.809	5.4197				13.1689	3.0992
13.0031	24.826				2.06271		4.14853	3.41417					15.586	5.38277				12.8599	3.0963
12.8798	24.641				2.03152		4.12137	3.41207					15.551	5.2822				12.56	3.0687
12.836	24.6001				1.98093		4.04225	3.40805					15.501	5.2791				12.3155	3.0569
12.766	24.5435				1.8964		3.99941	3.31029					15.484	5.25889				12.2752	3.0272
12.6831	24.419				1.83838		3.94902	3.28307					15.4449	5.2394				12.2123	3.0012
12.642	24.2235				1.81409		3.80307	3.25394					15.2594	5.2129				12.0577	2.9844
12.4902	24.0288				1.81082		3.68522	3.21884					15.225	5.1918				11.9595	2.9744
12.3554	23.8021				1.76731		3.6789	3.18226					15.114	5.011				11.8355	2.9488
12.3436	23.5433				1.75921		3.43271	3.03121					15.1057	4.98878				11.7931	2.9378
12.3418	23.3777				1.73563		3.38752	3.02163					14.963	4.9197				11.6684	2.9331
12.3297	23.249				1.72916		3.328	2.80965					14.8457	4.8971				11.4666	2.9206
12.3217	23.1363				1.65189		3.30006	2.77369					14.8336	4.7085				11.369	2.909
12.2914	23.1282				1.62786		3.13492	2.74966					14.794	4.6488				11.3551	2.7901
12.2254	23.0604				1.60732		3.01919	2.74077					14.6423	4.6414				11.3075	2.7647
12.1462	22.9577				1.53201		2.88527	2.70769					14.3611	4.64				11.1655	2.76
12.1283	22.9444				1.49009		2.81533	2.70676					14.3532	4.6314				10.7935	2.7554
11.9558	22.94				1.4681		2.73206	2.67406					14.0774	4.5795				10.6811	2.7328
11.9221	22.7273				1.45963		2.58731	2.64408					14.0715	4.5077				10.6034	2.7316
11.9144	22.6312				1.38006		2.52406	2.60368					14.067	4.49364				10.5769	2.7114
11.816	22.62				1.35556		2.44156	2.35881					14.0153	4.3933				10.5079	2.69
11.7847	22.5993				1.27195		2.20037						13.9149	4.3788				10.395	2.6885
11.768	22.5469				1.00907								13.9091	4.3428				10.3604	2.6731
11.6891	22.5037				0.975791								13.783	4.2929				10.3517	2.6648
11.5689	22.1667												13.6158	4.18173				10.2506	2.6312
11.48	22.1619												13.584	4.139				10.0532	2.6019
11.3658	21.982												13.5573	4.1337				10.0489	2.5734
11.3273	21.965												13.3808	3.897				9.9712	2.5561
11.2987	21.9279												13.3072	3.88121				9.9128	2.5102
11.275	21.8193												13.2307	3.84192				9.9062	2.5102
11.1852	21.7996												13.1996	3.74638				9.8403	2.4997
11.0487	21.7004												13.1584	3.5889				9.8222	2.4811
10.9817	21.6813												13.1114	3.52897				9.7777	2.4609
10.9037	21.6329												12.9215	3.508				9.7327	2.4524
10.8786	21.5964												12.4525	3.4931				9.7059	2.449
10.829	21.5894												12.3883	3.4813				9.5559	2.4318
10.7982	21.3819												12.2707	3.4682				9.5093	2.429
10.77	21.3413												12.24	3.3782				9.5049	2.3665
10.7457	21.3197												12.2184	3.28504				9.4911	2.3523
10.7024	21.2182												12.196	3.2207				9.4768	2.3414
10.5674	21.2078												12.161	3.14468				9.4531	2.3293
10.5305	21.2004												12.1302	3.04508				9.3136	2.3259
10.5205	21.1801												12.1215	2.655				9.3106	2.325
10.4743	20.931												12.0984	2.564				9.3003	2.3173
10.4511	20.9152												12.0956	0				9.227	2.3079
10.421	20.8518												12.068					9.2148	2.2774
10.3988	20.781												11.6002					9.1674	2.2765
10.3502	20.6299												11.5447					9.1497	2.2584
10.3416	20.6072												11.5182					9.1281	2.2506
10.3362	20.4332												11.42					9.1013	2.2127
10.3352	20.3582												11.4182					9.0896	2.1413
10.329	20.3144												11.357					9.065	2.1169
10.2958	20.1116												11.351					8.9711	2.0901
10.274	19.7251												11.3418					8.9623	2.0642
10.2654	19.7091												11.2815					8.9452	2.0361
10.121	19.701												11.2018					8.9209	1.9003
10.1113	19.523												11.179					8.8859	1.8968
10.0938	19.4619												11.1729					8.8127	1.8816
10.034	19.1715												11.1354					8.7511	1.8663
10.0333	18.8431												11.0249					8.7275	1.811
9.9938	18.7979												11.0075					8.7079	1.7034
9.9695	18.7667												10.9009					8.6841	1.7006
9.92268	18.7543												10.767					8.633	1.6972
9.9149	18.7095												10.7456					8.6168	1.2562
9.913	18.4237												10.6855					8.5767	0.6687
9.89873	18.2293												10.6768					8.5182
9.8782	18.0783												10.6026					8.507
9.8362	17.9251												10.569					8.3947
9.7512	17.9131												10.5121					8.2922
9.744	17.8718												10.4681					8.262
9.66495	17.8136												10.468					8.1552
9.655	17.7987												10.3988					8.1167
9.6317	17.6412												10.3883					8.074
9.6176	17.6058												10.2561					8.0362
9.5528	17.5648												10.139					8.0136
9.3394	17.5467												10.0751					7.9268
9.27354	17.5333												10.0495					7.9234
9.26381	17.5045												10.0148					7.8889
9.1892	17.1625												9.9172					7.8777
9.1669	17.0484												9.9096					7.8527
9.12289	17.0253												9.8711					7.8476
9.122	16.9987												9.7708					7.8033
9.093	16.8387												9.675					7.7493
9.0853	16.807												9.6092					7.7448
9.0543	16.7728												9.5275					7.6826
8.8961	16.693												9.3492					7.6705
8.891	16.6535												9.3393					7.6688
8.8772	16.6341												9.2707					7.6502
8.8258	16.632												9.2047					7.634
8.7776	16.6049												8.9496					7.6191
8.7638	16.5993												8.93021					7.6035
8.715	16.5729												8.8248					7.589
8.6318	16.462												8.7972					7.5565
8.58	16.4445												8.775					7.5152
8.5785	16.3929												8.744					7.4877
8.5687	16.3471												8.6028					7.4562
8.54867	16.2956												8.5637					7.3916
8.47171	16.2378												8.5299					7.3544
8.4698	16.1574												8.3737					7.3251
8.447	16.1433												8.248					7.3185
8.44572	16.0897												8.0943					7.3076
8.4347	16.0723												8.0421					7.2837
8.4059	16.0332												8.0187					7.27
8.389	16.0153												7.9392					7.2562
8.31229	16.0011												7.7991					7.2466
8.2615	15.9741												7.6848					7.24
8.123	15.8692												7.353					7.2072
8.0819	15.8213												7.3246					7.203
8.0362	15.7716												7.2908					7.1775
8.031	15.7668												7.2265					7.16
7.8817	15.7555												7.0317					7.0849
7.835	15.7447												6.938					7.0575
7.7287	15.7391												6.8208					7.0236
7.7205	15.5199												6.7669					7.0208
7.6025	15.4978												6.6421					6.9701
7.5825	15.4499												6.2891					6.9465
7.5435	15.3421												5.994					6.9435
7.4958	15.2903												5.9576					6.8877
7.4927	15.252												5.9545					6.8845
7.4856	15.241												5.874					6.8805
7.3846	15.2143												5.8506					6.8678
7.37	15.1981												5.417					6.8201
7.3241	15.178												5.244					6.7736
7.245	15.0493												5.18					6.7613
7.2015	14.9055												5.0862					6.7562
7.1619	14.8881												4.771					6.7419
7.13961	14.847												4.4916					6.7392
7.1231	14.685												3.1005					6.7196
7.09405	14.6768																	6.7145
7.0922	14.6343																	6.6787
7.0644	14.5531																	6.6727
7.0222	14.4296																	6.547
7.02093	14.41																	6.5092
7.0055	14.3767																	6.4893
6.9746	14.3111																	6.4892
6.9241	14.304																	6.3961
6.91399	14.2879																	6.3252
6.8431	14.2281																	6.3251
6.8086	14.144																	6.3169
6.7876	14.1291																	6.283
6.7856	14.127																	6.2609
6.785	14.0664																	6.2492
6.7671	14.0292																	6.2235
6.7151	14.0283																	6.211
6.6991	14.0156																	6.2011
6.555	14.009																	6.1983
6.54027	14.0041																	6.1939
6.5178	13.9452																	6.1761
6.46556	13.914																	6.1193
6.4388	13.891																	6.1152
6.424	13.8696																	6.0932
6.4081	13.8664																	6.0807
6.3632	13.8529																	6.0801
6.325	13.8186																	6.069
6.22934	13.7964																	5.9809
6.2227	13.749																	5.964
6.19324	13.7365																	5.9501
6.1714	13.7117																	5.8791
6.13581	13.71																	5.8765
6.1179	13.698																	5.8238
6.11401	13.6689																	5.8035
6.044	13.645																	5.7991
6.0362	13.5416																	5.7671
6.0298	13.4936																	5.7456
6.0163	13.4741																	5.7349
6.00824	13.3908																	5.673
6.00514	13.3659																	5.6692
5.9484	13.3461																	5.6588
5.7967	13.2837																	5.6465
5.7302	13.2151																	5.62883
5.683	13.2142																	5.6233
5.6606	13.2027																	5.5991
5.6159	13.1703																	5.534
5.615	13.13																	5.4805
5.6143	13.1102																	5.4346
5.5922	13.101																	5.428
5.4279	13																	5.422
5.3374	12.9794																	5.4072
5.3004	12.9074																	5.3914
5.29854	12.8964																	5.3733
5.2945	12.8662																	5.3608
5.28368	12.8498																	5.3233
5.252	12.7984																	5.269
5.25	12.7964																	5.2639
5.20744	12.7177																	5.2568
5.1976	12.6267																	5.2432
5.1752	12.5507																	5.2213
5.16554	12.5105																	5.1702
5.06607	12.5059																	5.1605
5.03167	12.4688																	5.1326
4.98622	12.4427																	5.12
4.9594	12.3374																	4.999
4.916	12.316																	4.9629
4.90179	12.2906																	4.9533
4.894	12.2887																	4.9315
4.84696	12.288																	4.9159
4.80477	12.2149																	4.8538
4.7875	12.1863																	4.8372
4.78688	12.1102																	4.8254
4.73577	12.0786																	4.7705
4.7127	12.0719																	4.7286
4.7072	12.062																	4.722
4.7025	12.0508																	4.6802
4.67889	12.0358																	4.5822
4.67	12.0152																	4.5495
4.669	12.0118																	4.5252
4.62954	11.9777																	4.4956
4.62771	11.95																	4.3782
4.60299	11.8914																	4.3474
4.57271	11.835																	4.34
4.5553	11.8325																	4.3207
4.51775	11.81																	4.282
4.45433	11.8088																	4.2801
4.3826	11.7977																	4.2486
4.3712	11.7915																	4.1975
4.324	11.774																	4.1802
4.2901	11.724																	4.1476
4.249	11.6221																	4.082
4.23991	11.5987																	4.07405
4.20367	11.577																	4.021
4.20367	11.5589																	3.963
4.177	11.535																	3.9416
4.16457	11.5291																	3.8958
4.1504	11.5189																	3.8777
4.14341	11.5189																	3.8481
4.13833	11.5059																	3.8424
4.0601	11.4759																	3.7818
4.0088	11.3936																	3.7272
3.97621	11.3069																	3.703
3.96488	11.2985																	3.7012
3.9488	11.2843																	3.683
3.9146	11.2781																	3.578
3.88227	11.1982																	3.5542
3.7938	11.173																	3.4854
3.7878	11.135																	3.47
3.74531	11.1315																	3.467
3.7262	11.1313																	3.436
3.67942	11.0336																	3.3017
3.6675	10.933																	3.2716
3.6571	10.9008																	3.0993
3.60618	10.8729																	2.8574
3.6037	10.8197																	2.7582
3.56779	10.7885																	1.8838
3.52795	10.749
3.51778	10.7471
3.49896	10.7319
3.46354	10.711
3.418	10.687
3.33075	10.6356
3.31234	10.629
3.30422	10.6166
3.26083	10.567
3.24492	10.5367
3.15989	10.507
3.1477	10.5062
3.11619	10.4681
3.09305	10.4639
3.0821	10.4266
2.97151	10.4197
2.96384	10.396
2.92108	10.3959
2.86668	10.395
2.84974	10.3567
2.8394	10.2119
2.83186	10.1649
2.7887	10.147
2.77605	10.0899
2.66685	10.0606
2.64642	10.045
2.52493	9.975
2.49563	9.953
1.32215	9.92268
	9.92268
	9.89
	9.8821
	9.8761
	9.8616
	9.7988
	9.774
	9.76406
	9.764
	9.73003
	9.67574
	9.644
	9.63153
	9.6267
	9.6209
	9.6123
	9.5712
	9.53652
	9.4954
	9.48532
	9.4329
	9.4182
	9.4097
	9.3968
	9.3621
	9.36
	9.3137
	9.2964
	9.2947
	9.2613
	9.2291
	9.22708
	9.048
	9.0373
	9.02977
	9.015
	8.998
	8.9774
	8.94265
	8.93
	8.9088
	8.89
	8.863
	8.788
	8.77
	8.7693
	8.71615
	8.69322
	8.68668
	8.6442
	8.6367
	8.5077
	8.489
	8.4597
	8.45002
	8.446
	8.445
	8.39767
	8.38
	8.32923
	8.317
	8.29523
	8.213
	8.1241
	8.11891
	8.1178
	8.1067
	8.0899
	8.0894
	8.0517
	8.04169
	8.0241
	8.0216
	8.019
	8.01488
	8.00659
	7.9651
	7.95335
	7.86544
	7.82128
	7.7927
	7.7917
	7.786
	7.7291
	7.729
	7.6568
	7.6315
	7.6044
	7.59776
	7.593
	7.58626
	7.58057
	7.5515
	7.5316
	7.5046
	7.5038
	7.5016
	7.4754
	7.4662
	7.4526
	7.442
	7.42378
	7.4041
	7.40302
	7.3867
	7.3408
	7.33605
	7.3252
	7.316
	7.284
	7.2429
	7.23439
	7.2296
	7.196
	7.14321
	7.1319
	7.1241
	7.112
	7.0766
	7.067
	7.0658
	7.02273
	7.00509
	6.96287
	6.9446
	6.9301
	6.9151
	6.9145
	6.891
	6.88231
	6.88049
	6.85656
	6.8445
	6.824
	6.77844
	6.7279
	6.6394
	6.5987
	6.54851
	6.5338
	6.5302
	6.5073
	6.4398
	6.43237
	6.42751
	6.4166
	6.38054
	6.296
	6.28143
	6.24668
	6.2123
	6.205
	6.19644
	6.17974
	6.16357
	6.15272
	6.14658
	6.143
	6.139
	6.1282
	6.117
	6.10096
	6.0941
	6.0929
	6.077
	6.0664
	6.0538
	6.0402
	6.03937
	6.01887
	5.9736
	5.96549
	5.964
	5.95043
	5.9392
	5.937
	5.93687
	5.93687
	5.9283
	5.9214
	5.90784
	5.88519
	5.8673
	5.785
	5.77842
	5.76803
	5.7579
	5.73752
	5.73601
	5.72579
	5.6761
	5.6721
	5.6264
	5.62288
	5.5993
	5.588
	5.5676
	5.56269
	5.561
	5.50537
	5.5032
	5.4955
	5.49054
	5.45
	5.44289
	5.4374
	5.43726
	5.40636
	5.3995
	5.39929
	5.38689
	5.37314
	5.3609
	5.35
	5.32418
	5.29979
	5.2789
	5.2744
	5.263
	5.2253
	5.22022
	5.21819
	5.20192
	5.191
	5.1826
	5.18186
	5.17569
	5.17365
	5.16957
	5.15889
	5.1451
	5.13945
	5.134
	5.1147
	5.10957
	5.105
	5.10279
	5.09886
	5.0507
	5.03104
	5.0299
	5.00559
	5.00172
	4.97846
	4.97718
	4.9715
	4.96279
	4.95367
	4.94568
	4.9431
	4.922
	4.91596
	4.87378
	4.86485
	4.8545
	4.84632
	4.8201
	4.78562
	4.7746
	4.7692
	4.76793
	4.755
	4.7538
	4.7323
	4.70471
	4.672
	4.66656
	4.65894
	4.655
	4.65387
	4.6536
	4.6176
	4.614
	4.60542
	4.5657
	4.56061
	4.53248
	4.52511
	4.50318
	4.48288
	4.4816
	4.46857
	4.46255
	4.44166
	4.4195
	4.41596
	4.40382
	4.39791
	4.39609
	4.3908
	4.383
	4.3731
	4.3681
	4.35625
	4.32494
	4.31123
	4.28839
	4.2794
	4.27278
	4.25408
	4.25291
	4.23933
	4.2384
	4.2357
	4.23313
	4.225
	4.2233
	4.21552
	4.20242
	4.19425
	4.1903
	4.17823
	4.17589
	4.16797
	4.1328
	4.12574
	4.12137
	4.0874
	4.06833
	4.04455
	4.03882
	4.03764
	3.9751
	3.9751
	3.97052
	3.96656
	3.95583
	3.94452
	3.9155
	3.8889
	3.8563
	3.84908
	3.84408
	3.84303
	3.83865
	3.8155
	3.80307
	3.7856
	3.7856
	3.7731
	3.76708
	3.7549
	3.74215
	3.735
	3.71973
	3.70692
	3.66776
	3.64307
	3.64104
	3.63995
	3.62613
	3.61553
	3.60618
	3.59979
	3.57957
	3.54257
	3.53474
	3.53008
	3.53008
	3.52897
	3.52391
	3.50529
	3.4836
	3.48206
	3.4489
	3.36009
	3.32452
	3.31645
	3.31029
	3.29703
	3.26231
	3.22398
	3.20002
	3.1897
	3.17239
	3.16326
	3.16228
	3.1408
	3.08723
	3.06676
	2.99453
	2.8495
	2.82168
	2.56137
	2.51621
	2.2487
	0.0397
