# Supplementary material for: Metabolic reprogramming of cancer cells by JMJD6-mediated pre-mRNA splicing associated with therapeutic response to splicing inhibitor
Source: eLife journal article supplement (doi:10.7554/elife.90993), 2023-11-01
Supplement: data1 [file Figure 3 Data source.xlsx]

## Sheet: Figure 3A
Overlap Results
Collection(s):	CP:KEGG
# overlaps shown:	4
# genesets in collections:	186
# genes in comparison (n):	508
# genes in universe (N):	40312
Gene Set Name	# Genes in Gene Set (K)	Description	# Genes in Overlap (k)	k/K	p-value	FDR q-value
KEGG_SPLICEOSOME	127	Spliceosome	11	0.0866	6.83e-07	0.000127
KEGG_SYSTEMIC_LUPUS_ERYTHEMATOSUS	139	Systemic lupus erythematosus	11	0.0791	1.68e-06	0.000156
KEGG_UBIQUITIN_MEDIATED_PROTEOLYSIS	135	Ubiquitin mediated proteolysis	9	0.0667	5.74e-05	0.00356
KEGG_ENDOCYTOSIS	181	Endocytosis	9	0.0497	0.000519	0.0241
Gene/Gene Set Overlap Matrix
Entrez Gene Id	Gene Symbol	Gene Description	KEGG_SPLICEOSOME	KEGG_SYSTEMIC_LUPUS_ERYTHEMATOSUS	KEGG_UBIQUITIN_MEDIATED_PROTEOLYSIS	KEGG_ENDOCYTOSIS
3310	HSPA6	heat shock protein family A (Hsp70) member 6 [Source:HGNC Symbol;Acc:HGNC:5239]	KEGG_SPLICEOSOME			KEGG_ENDOCYTOSIS
10285	SMNDC1	survival motor neuron domain containing 1 [Source:HGNC Symbol;Acc:HGNC:16900]	KEGG_SPLICEOSOME
10465	PPIH	peptidylprolyl isomerase H [Source:HGNC Symbol;Acc:HGNC:14651]	KEGG_SPLICEOSOME
10915	TCERG1	transcription elongation regulator 1 [Source:HGNC Symbol;Acc:HGNC:15630]	KEGG_SPLICEOSOME
11017	SNRNP27	small nuclear ribonucleoprotein U4/U6.U5 subunit 27 [Source:HGNC Symbol;Acc:HGNC:30240]	KEGG_SPLICEOSOME
23451	SF3B1	splicing factor 3b subunit 1 [Source:HGNC Symbol;Acc:HGNC:10768]	KEGG_SPLICEOSOME
5093	PCBP1	poly(rC) binding protein 1 [Source:HGNC Symbol;Acc:HGNC:8647]	KEGG_SPLICEOSOME
55660	PRPF40A	pre-mRNA processing factor 40 homolog A [Source:HGNC Symbol;Acc:HGNC:16463]	KEGG_SPLICEOSOME
6434	TRA2B	transformer 2 beta homolog [Source:HGNC Symbol;Acc:HGNC:10781]	KEGG_SPLICEOSOME
84321	THOC3	THO complex 3 [Source:HGNC Symbol;Acc:HGNC:19072]	KEGG_SPLICEOSOME
9092	SART1	spliceosome associated factor 1, recruiter of U4/U6.U5 tri-snRNP [Source:HGNC Symbol;Acc:HGNC:10538]	KEGG_SPLICEOSOME
3012	H2AC8	H2A clustered histone 8 [Source:HGNC Symbol;Acc:HGNC:4724]		KEGG_SYSTEMIC_LUPUS_ERYTHEMATOSUS
3015	H2AZ1	H2A.Z variant histone 1 [Source:HGNC Symbol;Acc:HGNC:4741]		KEGG_SYSTEMIC_LUPUS_ERYTHEMATOSUS
3021	H3-3B	H3.3 histone B [Source:HGNC Symbol;Acc:HGNC:4765]		KEGG_SYSTEMIC_LUPUS_ERYTHEMATOSUS
653604	H3C13	H3 clustered histone 13 [Source:HGNC Symbol;Acc:HGNC:25311]		KEGG_SYSTEMIC_LUPUS_ERYTHEMATOSUS
8335	H2AC4	H2A clustered histone 4 [Source:HGNC Symbol;Acc:HGNC:4734]		KEGG_SYSTEMIC_LUPUS_ERYTHEMATOSUS
8336	H2AC17	H2A clustered histone 17 [Source:HGNC Symbol;Acc:HGNC:4735]		KEGG_SYSTEMIC_LUPUS_ERYTHEMATOSUS
8338	H2AC20	H2A clustered histone 20 [Source:HGNC Symbol;Acc:HGNC:4738]		KEGG_SYSTEMIC_LUPUS_ERYTHEMATOSUS
8350	H3C1	H3 clustered histone 1 [Source:HGNC Symbol;Acc:HGNC:4766]		KEGG_SYSTEMIC_LUPUS_ERYTHEMATOSUS
85235	H2AC12	H2A clustered histone 12 [Source:HGNC Symbol;Acc:HGNC:13671]		KEGG_SYSTEMIC_LUPUS_ERYTHEMATOSUS
8970	H2BC11	H2B clustered histone 11 [Source:HGNC Symbol;Acc:HGNC:4761]		KEGG_SYSTEMIC_LUPUS_ERYTHEMATOSUS
9555	MACROH2A1	macroH2A.1 histone [Source:HGNC Symbol;Acc:HGNC:4740]		KEGG_SYSTEMIC_LUPUS_ERYTHEMATOSUS
7428	VHL	von Hippel-Lindau tumor suppressor [Source:HGNC Symbol;Acc:HGNC:12687]			KEGG_UBIQUITIN_MEDIATED_PROTEOLYSIS
10273	STUB1	STIP1 homology and U-box containing protein 1 [Source:HGNC Symbol;Acc:HGNC:11427]			KEGG_UBIQUITIN_MEDIATED_PROTEOLYSIS
10477	UBE2E3	ubiquitin conjugating enzyme E2 E3 [Source:HGNC Symbol;Acc:HGNC:12479]			KEGG_UBIQUITIN_MEDIATED_PROTEOLYSIS
51366	UBR5	ubiquitin protein ligase E3 component n-recognin 5 [Source:HGNC Symbol;Acc:HGNC:16806]			KEGG_UBIQUITIN_MEDIATED_PROTEOLYSIS
57448	BIRC6	baculoviral IAP repeat containing 6 [Source:HGNC Symbol;Acc:HGNC:13516]			KEGG_UBIQUITIN_MEDIATED_PROTEOLYSIS
63893	UBE2O	ubiquitin conjugating enzyme E2 O [Source:HGNC Symbol;Acc:HGNC:29554]			KEGG_UBIQUITIN_MEDIATED_PROTEOLYSIS
65264	UBE2Z	ubiquitin conjugating enzyme E2 Z [Source:HGNC Symbol;Acc:HGNC:25847]			KEGG_UBIQUITIN_MEDIATED_PROTEOLYSIS
7319	UBE2A	ubiquitin conjugating enzyme E2 A [Source:HGNC Symbol;Acc:HGNC:12472]			KEGG_UBIQUITIN_MEDIATED_PROTEOLYSIS
8924	HERC2	HECT and RLD domain containing E3 ubiquitin protein ligase 2 [Source:HGNC Symbol;Acc:HGNC:4868]			KEGG_UBIQUITIN_MEDIATED_PROTEOLYSIS
5868	RAB5A	RAB5A, member RAS oncogene family [Source:HGNC Symbol;Acc:HGNC:9783]				KEGG_ENDOCYTOSIS
8766	RAB11A	RAB11A, member RAS oncogene family [Source:HGNC Symbol;Acc:HGNC:9760]				KEGG_ENDOCYTOSIS
3107	HLA-C	major histocompatibility complex, class I, C [Source:HGNC Symbol;Acc:HGNC:4933]				KEGG_ENDOCYTOSIS
1212	CLTB	clathrin light chain B [Source:HGNC Symbol;Acc:HGNC:2091]				KEGG_ENDOCYTOSIS
1759	DNM1	dynamin 1 [Source:HGNC Symbol;Acc:HGNC:2972]				KEGG_ENDOCYTOSIS
10015	PDCD6IP	programmed cell death 6 interacting protein [Source:HGNC Symbol;Acc:HGNC:8766]				KEGG_ENDOCYTOSIS
116983	ACAP3	ArfGAP with coiled-coil, ankyrin repeat and PH domains 3 [Source:HGNC Symbol;Acc:HGNC:16754]				KEGG_ENDOCYTOSIS
5867	RAB4A	RAB4A, member RAS oncogene family [Source:HGNC Symbol;Acc:HGNC:9781]				KEGG_ENDOCYTOSIS
71	ACTG1	actin gamma 1 [Source:HGNC Symbol;Acc:HGNC:144]
5881	RAC3	Rac family small GTPase 3 [Source:HGNC Symbol;Acc:HGNC:9803]
2064	ERBB2	erb-b2 receptor tyrosine kinase 2 [Source:HGNC Symbol;Acc:HGNC:3430]
10458	BAIAP2	BAR/IMD domain containing adaptor protein 2 [Source:HGNC Symbol;Acc:HGNC:947]
9855	FARP2	FERM, ARH/RhoGEF and pleckstrin domain protein 2 [Source:HGNC Symbol;Acc:HGNC:16460]
8818	DPM2	dolichyl-phosphate mannosyltransferase subunit 2, regulatory [Source:HGNC Symbol;Acc:HGNC:3006]
51227	PIGP	phosphatidylinositol glycan anchor biosynthesis class P [Source:HGNC Symbol;Acc:HGNC:3046]
5283	PIGH	phosphatidylinositol glycan anchor biosynthesis class H [Source:HGNC Symbol;Acc:HGNC:8964]
2584	GALK1	galactokinase 1 [Source:HGNC Symbol;Acc:HGNC:4118]
2585	GALK2	galactokinase 2 [Source:HGNC Symbol;Acc:HGNC:4119]
5211	PFKL	phosphofructokinase, liver type [Source:HGNC Symbol;Acc:HGNC:8876]
396	ARHGDIA	Rho GDP dissociation inhibitor alpha [Source:HGNC Symbol;Acc:HGNC:678]
3706	ITPKA	inositol-trisphosphate 3-kinase A [Source:HGNC Symbol;Acc:HGNC:6178]
5286	PIK3C2A	phosphatidylinositol-4-phosphate 3-kinase catalytic subunit type 2 alpha [Source:HGNC Symbol;Acc:HGNC:8971]
9562	MINPP1	multiple inositol-polyphosphate phosphatase 1 [Source:HGNC Symbol;Acc:HGNC:7102]
7277	TUBA4A	tubulin alpha 4a [Source:HGNC Symbol;Acc:HGNC:12407]
81027	TUBB1	tubulin beta 1 class VI [Source:HGNC Symbol;Acc:HGNC:16257]
22978	NT5C2	5'-nucleotidase, cytosolic II [Source:HGNC Symbol;Acc:HGNC:8022]
30833	NT5C	5', 3'-nucleotidase, cytosolic [Source:HGNC Symbol;Acc:HGNC:17144]
3630	INS	insulin [Source:HGNC Symbol;Acc:HGNC:6081]
3280	HES1	hes family bHLH transcription factor 1 [Source:HGNC Symbol;Acc:HGNC:5192]
6118	RPA2	replication protein A2 [Source:HGNC Symbol;Acc:HGNC:10290]
5892	RAD51D	RAD51 paralog D [Source:HGNC Symbol;Acc:HGNC:9823]
1375	CPT1B	carnitine palmitoyltransferase 1B [Source:HGNC Symbol;Acc:HGNC:2329]
8717	TRADD	TNFRSF1A associated via death domain [Source:HGNC Symbol;Acc:HGNC:12030]
4794	NFKBIE	NFKB inhibitor epsilon [Source:HGNC Symbol;Acc:HGNC:7799]
598	BCL2L1	BCL2 like 1 [Source:HGNC Symbol;Acc:HGNC:992]
410	ARSA	arylsulfatase A [Source:HGNC Symbol;Acc:HGNC:713]
10239	AP3S2	adaptor related protein complex 3 subunit sigma 2 [Source:HGNC Symbol;Acc:HGNC:571]
23163	GGA3	golgi associated, gamma adaptin ear containing, ARF binding protein 3 [Source:HGNC Symbol;Acc:HGNC:17079]
8526	DGKE	diacylglycerol kinase epsilon [Source:HGNC Symbol;Acc:HGNC:2852]
154141	MBOAT1	membrane bound O-acyltransferase domain containing 1 [Source:HGNC Symbol;Acc:HGNC:21579]
1119	CHKA	choline kinase alpha [Source:HGNC Symbol;Acc:HGNC:1937]
8877	SPHK1	sphingosine kinase 1 [Source:HGNC Symbol;Acc:HGNC:11240]
15	AANAT	aralkylamine N-acetyltransferase [Source:HGNC Symbol;Acc:HGNC:19]
8564	KMO	kynurenine 3-monooxygenase [Source:HGNC Symbol;Acc:HGNC:6381]
7507	XPA	XPA, DNA damage recognition and repair factor [Source:HGNC Symbol;Acc:HGNC:12814]
1291	COL6A1	collagen type VI alpha 1 chain [Source:HGNC Symbol;Acc:HGNC:2211]
83660	TLN2	talin 2 [Source:HGNC Symbol;Acc:HGNC:15447]
283748	PLA2G4D	phospholipase A2 group IVD [Source:HGNC Symbol;Acc:HGNC:30038]
4149	MAX	MYC associated factor X [Source:HGNC Symbol;Acc:HGNC:6913]
11072	DUSP14	dual specificity phosphatase 14 [Source:HGNC Symbol;Acc:HGNC:17007]
23162	MAPK8IP3	mitogen-activated protein kinase 8 interacting protein 3 [Source:HGNC Symbol;Acc:HGNC:6884]
4296	MAP3K11	mitogen-activated protein kinase kinase kinase 11 [Source:HGNC Symbol;Acc:HGNC:6850]
7083	TK1	thymidine kinase 1 [Source:HGNC Symbol;Acc:HGNC:11830]
54434	SSH1	slingshot protein phosphatase 1 [Source:HGNC Symbol;Acc:HGNC:30579]
6776	STAT5A	signal transducer and activator of transcription 5A [Source:HGNC Symbol;Acc:HGNC:11366]
2689	GH2	growth hormone 2 [Source:HGNC Symbol;Acc:HGNC:4262]
3581	IL9R	interleukin 9 receptor [Source:HGNC Symbol;Acc:HGNC:6030]
4671	NAIP	NLR family apoptosis inhibitory protein [Source:HGNC Symbol;Acc:HGNC:7634]
84674	CARD6	caspase recruitment domain family member 6 [Source:HGNC Symbol;Acc:HGNC:16394]
291	SLC25A4	solute carrier family 25 member 4 [Source:HGNC Symbol;Acc:HGNC:10990]
3486	IGFBP3	insulin like growth factor binding protein 3 [Source:HGNC Symbol;Acc:HGNC:5472]
9540	TP53I3	tumor protein p53 inducible protein 3 [Source:HGNC Symbol;Acc:HGNC:19373]
11001	SLC27A2	solute carrier family 27 member 2 [Source:HGNC Symbol;Acc:HGNC:10996]
3665	IRF7	interferon regulatory factor 7 [Source:HGNC Symbol;Acc:HGNC:6122]
516	ATP5MC1	ATP synthase membrane subunit c locus 1 [Source:HGNC Symbol;Acc:HGNC:841]
11315	PARK7	Parkinsonism associated deglycase [Source:HGNC Symbol;Acc:HGNC:16369]
1144	CHRND	cholinergic receptor nicotinic delta subunit [Source:HGNC Symbol;Acc:HGNC:1965]
4543	MTNR1A	melatonin receptor 1A [Source:HGNC Symbol;Acc:HGNC:7463]
4987	OPRL1	opioid related nociceptin receptor 1 [Source:HGNC Symbol;Acc:HGNC:8155]
7068	THRB	thyroid hormone receptor beta [Source:HGNC Symbol;Acc:HGNC:11799]
7168	TPM1	tropomyosin 1 [Source:HGNC Symbol;Acc:HGNC:12010]
375790	AGRN	agrin [Source:HGNC Symbol;Acc:HGNC:329]
995	CDC25C	cell division cycle 25C [Source:HGNC Symbol;Acc:HGNC:1727]
5522	PPP2R2C	protein phosphatase 2 regulatory subunit Bgamma [Source:HGNC Symbol;Acc:HGNC:9306]
23433	RHOQ	ras homolog family member Q [Source:HGNC Symbol;Acc:HGNC:17736]
22943	DKK 1.00	dickkopf WNT signaling pathway inhibitor 1 [Source:HGNC Symbol;Acc:HGNC:2891]
25825	BACE2	beta-secretase 2 [Source:HGNC Symbol;Acc:HGNC:934]
8771	TNFRSF6B	TNF receptor superfamily member 6b [Source:HGNC Symbol;Acc:HGNC:11921]
4258	MGST2	microsomal glutathione S-transferase 2 [Source:HGNC Symbol;Acc:HGNC:7063]
9125	CNOT9	CCR4-NOT transcription complex subunit 9 [Source:HGNC Symbol;Acc:HGNC:10445]
873	CBR1	carbonyl reductase 1 [Source:HGNC Symbol;Acc:HGNC:1548]
2619	GAS1	growth arrest specific 1 [Source:HGNC Symbol;Acc:HGNC:4165]
5831	PYCR1	pyrroline-5-carboxylate reductase 1 [Source:HGNC Symbol;Acc:HGNC:9721]
9491	PSMF1	proteasome inhibitor subunit 1 [Source:HGNC Symbol;Acc:HGNC:9571]
9619	ABCG1	ATP binding cassette subfamily G member 1 [Source:HGNC Symbol;Acc:HGNC:73]
9836	LCMT2	leucine carboxyl methyltransferase 2 [Source:HGNC Symbol;Acc:HGNC:17558]
9342	SNAP29	synaptosome associated protein 29 [Source:HGNC Symbol;Acc:HGNC:11133]
55808	ST6GALNAC1	ST6 N-acetylgalactosaminide alpha-2,6-sialyltransferase 1 [Source:HGNC Symbol;Acc:HGNC:23614]
51181	DCXR	dicarbonyl and L-xylulose reductase [Source:HGNC Symbol;Acc:HGNC:18985]
6734	SRPRA	SRP receptor subunit alpha [Source:HGNC Symbol;Acc:HGNC:11307]
1468	SLC25A10	solute carrier family 25 member 10 [Source:HGNC Symbol;Acc:HGNC:10980]
251	ALPG	alkaline phosphatase, germ cell [Source:HGNC Symbol;Acc:HGNC:441]
10016	PDCD6	programmed cell death 6 [Source:HGNC Symbol;Acc:HGNC:8765]
100170841	EPOP	elongin BC and polycomb repressive complex 2 associated protein [Source:HGNC Symbol;Acc:HGNC:34493]
100288323	KRTAP21-3	keratin associated protein 21-3 [Source:HGNC Symbol;Acc:HGNC:34216]
10040	TOM1L1	target of myb1 like 1 membrane trafficking protein [Source:HGNC Symbol;Acc:HGNC:11983]
100506581	C16orf95	chromosome 16 open reading frame 95 [Source:HGNC Symbol;Acc:HGNC:40033]
10051	SMC4	structural maintenance of chromosomes 4 [Source:HGNC Symbol;Acc:HGNC:14013]
10121	ACTR1A	actin related protein 1A [Source:HGNC Symbol;Acc:HGNC:167]
10169	SERF2	small EDRK-rich factor 2 [Source:HGNC Symbol;Acc:HGNC:10757]
10236	HNRNPR	heterogeneous nuclear ribonucleoprotein R [Source:HGNC Symbol;Acc:HGNC:5047]
10287	RGS19	regulator of G protein signaling 19 [Source:HGNC Symbol;Acc:HGNC:13735]
10336	PCGF3	polycomb group ring finger 3 [Source:HGNC Symbol;Acc:HGNC:10066]
10395	DLC1	DLC1 Rho GTPase activating protein [Source:HGNC Symbol;Acc:HGNC:2897]
10460	TACC3	transforming acidic coiled-coil containing protein 3 [Source:HGNC Symbol;Acc:HGNC:11524]
10493	VAT1	vesicle amine transport 1 [Source:HGNC Symbol;Acc:HGNC:16919]
10539	GLRX3	glutaredoxin 3 [Source:HGNC Symbol;Acc:HGNC:15987]
10609	P3H4	prolyl 3-hydroxylase family member 4 (inactive) [Source:HGNC Symbol;Acc:HGNC:16946]
10670	RRAGA	Ras related GTP binding A [Source:HGNC Symbol;Acc:HGNC:16963]
10732	TCFL5	transcription factor like 5 [Source:HGNC Symbol;Acc:HGNC:11646]
10741	RBBP9	RB binding protein 9, serine hydrolase [Source:HGNC Symbol;Acc:HGNC:9892]
10898	CPSF4	cleavage and polyadenylation specific factor 4 [Source:HGNC Symbol;Acc:HGNC:2327]
10950	BTG3	BTG anti-proliferation factor 3 [Source:HGNC Symbol;Acc:HGNC:1132]
10980	COPS6	COP9 signalosome subunit 6 [Source:HGNC Symbol;Acc:HGNC:21749]
11052	CPSF6	cleavage and polyadenylation specific factor 6 [Source:HGNC Symbol;Acc:HGNC:13871]
11054	OGFR	opioid growth factor receptor [Source:HGNC Symbol;Acc:HGNC:15768]
11158	RABL2B	RAB, member of RAS oncogene family like 2B [Source:HGNC Symbol;Acc:HGNC:9800]
11188	NISCH	nischarin [Source:HGNC Symbol;Acc:HGNC:18006]
11269	DDX19B	DEAD-box helicase 19B [Source:HGNC Symbol;Acc:HGNC:2742]
112970	KTI12	KTI12 chromatin associated homolog [Source:HGNC Symbol;Acc:HGNC:25160]
113000	RPUSD1	RNA pseudouridine synthase domain containing 1 [Source:HGNC Symbol;Acc:HGNC:14173]
113655	MFSD3	major facilitator superfamily domain containing 3 [Source:HGNC Symbol;Acc:HGNC:25157]
114804	RNF157	ring finger protein 157 [Source:HGNC Symbol;Acc:HGNC:29402]
114932	MRFAP1L1	Morf4 family associated protein 1 like 1 [Source:HGNC Symbol;Acc:HGNC:28796]
115106	HAUS1	HAUS augmin like complex subunit 1 [Source:HGNC Symbol;Acc:HGNC:25174]
115426	UHRF2	ubiquitin like with PHD and ring finger domains 2 [Source:HGNC Symbol;Acc:HGNC:12557]
115817	DHRS1	dehydrogenase/reductase 1 [Source:HGNC Symbol;Acc:HGNC:16445]
116729	PPP1R27	protein phosphatase 1 regulatory subunit 27 [Source:HGNC Symbol;Acc:HGNC:16813]
118426	BORCS5	BLOC-1 related complex subunit 5 [Source:HGNC Symbol;Acc:HGNC:17950]
118611	C10orf90	chromosome 10 open reading frame 90 [Source:HGNC Symbol;Acc:HGNC:26563]
119467	CLRN3	clarin 3 [Source:HGNC Symbol;Acc:HGNC:20795]
124512	METTL23	methyltransferase like 23 [Source:HGNC Symbol;Acc:HGNC:26988]
124565	SLC38A10	solute carrier family 38 member 10 [Source:HGNC Symbol;Acc:HGNC:28237]
124590	USH1G	USH1 protein network component sans [Source:HGNC Symbol;Acc:HGNC:16356]
124641	OVCA2	OVCA2 serine hydrolase domain containing [Source:HGNC Symbol;Acc:HGNC:24203]
130888	FBXO36	F-box protein 36 [Source:HGNC Symbol;Acc:HGNC:27020]
131408	FAM131A	family with sequence similarity 131 member A [Source:HGNC Symbol;Acc:HGNC:28308]
1316	KLF6	Kruppel like factor 6 [Source:HGNC Symbol;Acc:HGNC:2235]
134492	NUDCD2	NudC domain containing 2 [Source:HGNC Symbol;Acc:HGNC:30535]
136991	ASZ1	ankyrin repeat, SAM and basic leucine zipper domain containing 1 [Source:HGNC Symbol;Acc:HGNC:1350]
1382	CRABP2	cellular retinoic acid binding protein 2 [Source:HGNC Symbol;Acc:HGNC:2339]
138311	DIPK1B	divergent protein kinase domain 1B [Source:HGNC Symbol;Acc:HGNC:28290]
140701	ABHD16B	abhydrolase domain containing 16B [Source:HGNC Symbol;Acc:HGNC:16128]
140809	SRXN1	sulfiredoxin 1 [Source:HGNC Symbol;Acc:HGNC:16132]
143884	CWF19L2	CWF19 like cell cycle control factor 2 [Source:HGNC Symbol;Acc:HGNC:26508]
1444	CSHL1	chorionic somatomammotropin hormone like 1 [Source:HGNC Symbol;Acc:HGNC:2442]
146540	ZNF785	zinc finger protein 785 [Source:HGNC Symbol;Acc:HGNC:26496]
146853	C17orf50	chromosome 17 open reading frame 50 [Source:HGNC Symbol;Acc:HGNC:29581]
1470	CST2	cystatin SA [Source:HGNC Symbol;Acc:HGNC:2474]
1471	CST3	cystatin C [Source:HGNC Symbol;Acc:HGNC:2475]
1473	CST5	cystatin D [Source:HGNC Symbol;Acc:HGNC:2477]
1482	NKX2-5	NK2 homeobox 5 [Source:HGNC Symbol;Acc:HGNC:2488]
148398	SAMD11	sterile alpha motif domain containing 11 [Source:HGNC Symbol;Acc:HGNC:28706]
149986	LSM14B	LSM family member 14B [Source:HGNC Symbol;Acc:HGNC:15887]
150678	COPS9	COP9 signalosome subunit 9 [Source:HGNC Symbol;Acc:HGNC:21314]
151987	PPP4R2	protein phosphatase 4 regulatory subunit 2 [Source:HGNC Symbol;Acc:HGNC:18296]
152002	XXYLT1	xyloside xylosyltransferase 1 [Source:HGNC Symbol;Acc:HGNC:26639]
152559	PAQR3	progestin and adipoQ receptor family member 3 [Source:HGNC Symbol;Acc:HGNC:30130]
153478	PLEKHG4B	pleckstrin homology and RhoGEF domain containing G4B [Source:HGNC Symbol;Acc:HGNC:29399]
153769	SH3RF2	SH3 domain containing ring finger 2 [Source:HGNC Symbol;Acc:HGNC:26299]
154791	FMC1	formation of mitochondrial complex V assembly factor 1 homolog [Source:HGNC Symbol;Acc:HGNC:26946]
155051	CRYGN	crystallin gamma N [Source:HGNC Symbol;Acc:HGNC:20458]
155054	ZNF425	zinc finger protein 425 [Source:HGNC Symbol;Acc:HGNC:20690]
157378	TMEM65	transmembrane protein 65 [Source:HGNC Symbol;Acc:HGNC:25203]
158062	LCN6	lipocalin 6 [Source:HGNC Symbol;Acc:HGNC:17337]
158135	TTLL11	tubulin tyrosine ligase like 11 [Source:HGNC Symbol;Acc:HGNC:18113]
170082	TCEANC	transcription elongation factor A N-terminal and central domain containing [Source:HGNC Symbol;Acc:HGNC:28277]
170690	ADAMTS16	ADAM metallopeptidase with thrombospondin type 1 motif 16 [Source:HGNC Symbol;Acc:HGNC:17108]
170960	ZNF721	zinc finger protein 721 [Source:HGNC Symbol;Acc:HGNC:29425]
1983	EIF5	eukaryotic translation initiation factor 5 [Source:HGNC Symbol;Acc:HGNC:3299]
199990	FAAP20	FA core complex associated protein 20 [Source:HGNC Symbol;Acc:HGNC:26428]
200931	SLC51A	solute carrier family 51 subunit alpha [Source:HGNC Symbol;Acc:HGNC:29955]
200958	MUC20	mucin 20, cell surface associated [Source:HGNC Symbol;Acc:HGNC:23282]
201254	CENPX	centromere protein X [Source:HGNC Symbol;Acc:HGNC:11422]
201255	LRRC45	leucine rich repeat containing 45 [Source:HGNC Symbol;Acc:HGNC:28302]
201292	TRIM65	tripartite motif containing 65 [Source:HGNC Symbol;Acc:HGNC:27316]
201299	RDM1	RAD52 motif containing 1 [Source:HGNC Symbol;Acc:HGNC:19950]
203260	CCDC107	coiled-coil domain containing 107 [Source:HGNC Symbol;Acc:HGNC:28465]
203522	INTS6L	integrator complex subunit 6 like [Source:HGNC Symbol;Acc:HGNC:27334]
2125	EVPL	envoplakin [Source:HGNC Symbol;Acc:HGNC:3503]
2195	FAT1	FAT atypical cadherin 1 [Source:HGNC Symbol;Acc:HGNC:3595]
221424	LRRC73	leucine rich repeat containing 73 [Source:HGNC Symbol;Acc:HGNC:21375]
22838	RNF44	ring finger protein 44 [Source:HGNC Symbol;Acc:HGNC:19180]
22950	SLC4A1AP	solute carrier family 4 member 1 adaptor protein [Source:HGNC Symbol;Acc:HGNC:13813]
22992	KDM2A	lysine demethylase 2A [Source:HGNC Symbol;Acc:HGNC:13606]
22994	CEP131	centrosomal protein 131 [Source:HGNC Symbol;Acc:HGNC:29511]
23029	RBM34	RNA binding motif protein 34 [Source:HGNC Symbol;Acc:HGNC:28965]
23064	SETX	senataxin [Source:HGNC Symbol;Acc:HGNC:445]
23108	RAP1GAP2	RAP1 GTPase activating protein 2 [Source:HGNC Symbol;Acc:HGNC:29176]
23210	JMJD6	jumonji domain containing 6, arginine demethylase and lysine hydroxylase [Source:HGNC Symbol;Acc:HGNC:19355]
23234	DNAJC9	DnaJ heat shock protein family (Hsp40) member C9 [Source:HGNC Symbol;Acc:HGNC:19123]
23256	SCFD1	sec1 family domain containing 1 [Source:HGNC Symbol;Acc:HGNC:20726]
23269	MGA	MAX dimerization protein MGA [Source:HGNC Symbol;Acc:HGNC:14010]
23424	TDRD7	tudor domain containing 7 [Source:HGNC Symbol;Acc:HGNC:30831]
23558	WBP2	WW domain binding protein 2 [Source:HGNC Symbol;Acc:HGNC:12738]
23567	ZNF346	zinc finger protein 346 [Source:HGNC Symbol;Acc:HGNC:16403]
23753	SDF2L1	stromal cell derived factor 2 like 1 [Source:HGNC Symbol;Acc:HGNC:10676]
2483	FRG1	FSHD region gene 1 [Source:HGNC Symbol;Acc:HGNC:3954]
253714	MMS22L	MMS22 like, DNA repair protein [Source:HGNC Symbol;Acc:HGNC:21475]
254528	MEIOB	meiosis specific with OB-fold [Source:HGNC Symbol;Acc:HGNC:28569]
256933	NPB	neuropeptide B [Source:HGNC Symbol;Acc:HGNC:30099]
257313	UTS2B	urotensin 2B [Source:HGNC Symbol;Acc:HGNC:30894]
25794	FSCN2	fascin actin-bundling protein 2, retinal [Source:HGNC Symbol;Acc:HGNC:3960]
25837	RAB26	RAB26, member RAS oncogene family [Source:HGNC Symbol;Acc:HGNC:14259]
25912	C1orf43	chromosome 1 open reading frame 43 [Source:HGNC Symbol;Acc:HGNC:29876]
259232	NALCN	sodium leak channel, non-selective [Source:HGNC Symbol;Acc:HGNC:19082]
25930	PTPN23	protein tyrosine phosphatase non-receptor type 23 [Source:HGNC Symbol;Acc:HGNC:14406]
26012	NSMF	NMDA receptor synaptonuclear signaling and neuronal migration factor [Source:HGNC Symbol;Acc:HGNC:29843]
26046	LTN1	listerin E3 ubiquitin protein ligase 1 [Source:HGNC Symbol;Acc:HGNC:13082]
26277	TINF2	TERF1 interacting nuclear factor 2 [Source:HGNC Symbol;Acc:HGNC:11824]
2637	GBX2	gastrulation brain homeobox 2 [Source:HGNC Symbol;Acc:HGNC:4186]
26507	CNNM1	cyclin and CBS domain divalent metal cation transport mediator 1 [Source:HGNC Symbol;Acc:HGNC:102]
26512	INTS6	integrator complex subunit 6 [Source:HGNC Symbol;Acc:HGNC:14879]
267	AMFR	autocrine motility factor receptor [Source:HGNC Symbol;Acc:HGNC:463]
267002	PGBD2	piggyBac transposable element derived 2 [Source:HGNC Symbol;Acc:HGNC:19399]
27031	NPHP3	nephrocystin 3 [Source:HGNC Symbol;Acc:HGNC:7907]
27072	VPS41	VPS41 subunit of HOPS complex [Source:HGNC Symbol;Acc:HGNC:12713]
27079	RPUSD2	RNA pseudouridine synthase domain containing 2 [Source:HGNC Symbol;Acc:HGNC:24180]
27107	ZBTB11	zinc finger and BTB domain containing 11 [Source:HGNC Symbol;Acc:HGNC:16740]
27351	DESI1	desumoylating isopeptidase 1 [Source:HGNC Symbol;Acc:HGNC:24577]
2738	GLI4	GLI family zinc finger 4 [Source:HGNC Symbol;Acc:HGNC:4320]
274	BIN1	bridging integrator 1 [Source:HGNC Symbol;Acc:HGNC:1052]
2817	GPC1	glypican 1 [Source:HGNC Symbol;Acc:HGNC:4449]
283212	KLHL35	kelch like family member 35 [Source:HGNC Symbol;Acc:HGNC:26597]
283489	CHAMP1	chromosome alignment maintaining phosphoprotein 1 [Source:HGNC Symbol;Acc:HGNC:20311]
283537	SLC46A3	solute carrier family 46 member 3 [Source:HGNC Symbol;Acc:HGNC:27501]
283652	SLC24A5	solute carrier family 24 member 5 [Source:HGNC Symbol;Acc:HGNC:20611]
283987	HID1	HID1 domain containing [Source:HGNC Symbol;Acc:HGNC:15736]
283999	TMEM235	transmembrane protein 235 [Source:HGNC Symbol;Acc:HGNC:27563]
284018	C17orf58	chromosome 17 open reading frame 58 [Source:HGNC Symbol;Acc:HGNC:27568]
284131	ENDOV	endonuclease V [Source:HGNC Symbol;Acc:HGNC:26640]
284184	NDUFAF8	NADH:ubiquinone oxidoreductase complex assembly factor 8 [Source:HGNC Symbol;Acc:HGNC:33551]
284207	METRNL	meteorin like, glial cell differentiation regulator [Source:HGNC Symbol;Acc:HGNC:27584]
285613	RELL2	RELT like 2 [Source:HGNC Symbol;Acc:HGNC:26902]
285676	ZNF454	zinc finger protein 454 [Source:HGNC Symbol;Acc:HGNC:21200]
28951	TRIB2	tribbles pseudokinase 2 [Source:HGNC Symbol;Acc:HGNC:30809]
28955	DEXI	Dexi homolog [Source:HGNC Symbol;Acc:HGNC:13267]
29063	ZCCHC4	zinc finger CCHC-type containing 4 [Source:HGNC Symbol;Acc:HGNC:22917]
29080	CCDC59	coiled-coil domain containing 59 [Source:HGNC Symbol;Acc:HGNC:25005]
29937	NENF	neudesin neurotrophic factor [Source:HGNC Symbol;Acc:HGNC:30384]
3050	HBZ	hemoglobin subunit zeta [Source:HGNC Symbol;Acc:HGNC:4835]
3208	HPCA	hippocalcin [Source:HGNC Symbol;Acc:HGNC:5144]
3219	HOXB9	homeobox B9 [Source:HGNC Symbol;Acc:HGNC:5120]
3226	HOXC10	homeobox C10 [Source:HGNC Symbol;Acc:HGNC:5122]
3297	HSF1	heat shock transcription factor 1 [Source:HGNC Symbol;Acc:HGNC:5224]
339123	JMJD8	jumonji domain containing 8 [Source:HGNC Symbol;Acc:HGNC:14148]
339453	TMEM240	transmembrane protein 240 [Source:HGNC Symbol;Acc:HGNC:25186]
339745	SPOPL	speckle type BTB/POZ protein like [Source:HGNC Symbol;Acc:HGNC:27934]
341	APOC1	apolipoprotein C1 [Source:HGNC Symbol;Acc:HGNC:607]
346171	ZFP57	ZFP57 zinc finger protein [Source:HGNC Symbol;Acc:HGNC:18791]
348995	NUP43	nucleoporin 43 [Source:HGNC Symbol;Acc:HGNC:21182]
353174	ZACN	zinc activated ion channel [Source:HGNC Symbol;Acc:HGNC:29504]
3622	ING2	inhibitor of growth family member 2 [Source:HGNC Symbol;Acc:HGNC:6063]
374875	HSD11B1L	hydroxysteroid 11-beta dehydrogenase 1 like [Source:HGNC Symbol;Acc:HGNC:30419]
375484	SIMC1	SUMO interacting motifs containing 1 [Source:HGNC Symbol;Acc:HGNC:24779]
379	ARL4D	ADP ribosylation factor like GTPase 4D [Source:HGNC Symbol;Acc:HGNC:656]
3843	IPO5	importin 5 [Source:HGNC Symbol;Acc:HGNC:6402]
386676	KRTAP10-9	keratin associated protein 10-9 [Source:HGNC Symbol;Acc:HGNC:22971]
387103	CENPW	centromere protein W [Source:HGNC Symbol;Acc:HGNC:21488]
388419	BTBD17	BTB domain containing 17 [Source:HGNC Symbol;Acc:HGNC:33758]
388523	ZNF728	zinc finger protein 728 [Source:HGNC Symbol;Acc:HGNC:32463]
388969	C2orf68	chromosome 2 open reading frame 68 [Source:HGNC Symbol;Acc:HGNC:34353]
389084	SNORC	secondary ossification center associated regulator of chondrocyte maturation [Source:HGNC Symbol;Acc:HGNC:33763]
389119	INKA1	inka box actin regulator 1 [Source:HGNC Symbol;Acc:HGNC:32480]
389541	LAMTOR4	late endosomal/lysosomal adaptor, MAPK and MTOR activator 4 [Source:HGNC Symbol;Acc:HGNC:33772]
3930	LBR	lamin B receptor [Source:HGNC Symbol;Acc:HGNC:6518]
3959	LGALS3BP	galectin 3 binding protein [Source:HGNC Symbol;Acc:HGNC:6564]
399818	EEF1AKMT2	EEF1A lysine methyltransferase 2 [Source:HGNC Symbol;Acc:HGNC:33787]
400629	TEX19	testis expressed 19 [Source:HGNC Symbol;Acc:HGNC:33802]
401474	SAMD12	sterile alpha motif domain containing 12 [Source:HGNC Symbol;Acc:HGNC:31750]
401565	FAM166A	family with sequence similarity 166 member A [Source:HGNC Symbol;Acc:HGNC:33818]
4025	LPO	lactoperoxidase [Source:HGNC Symbol;Acc:HGNC:6678]
4061	LY6E	lymphocyte antigen 6 family member E [Source:HGNC Symbol;Acc:HGNC:6727]
4097	MAFG	MAF bZIP transcription factor G [Source:HGNC Symbol;Acc:HGNC:6781]
414919	C8orf82	chromosome 8 open reading frame 82 [Source:HGNC Symbol;Acc:HGNC:33826]
4236	MFAP1	microfibril associated protein 1 [Source:HGNC Symbol;Acc:HGNC:7032]
4335	MNT	MAX network transcriptional repressor [Source:HGNC Symbol;Acc:HGNC:7188]
4340	MOG	myelin oligodendrocyte glycoprotein [Source:HGNC Symbol;Acc:HGNC:7197]
441478	NRARP	NOTCH regulated ankyrin repeat protein [Source:HGNC Symbol;Acc:HGNC:33843]
4485	MST1	macrophage stimulating 1 [Source:HGNC Symbol;Acc:HGNC:7380]
4600	MX2	MX dynamin like GTPase 2 [Source:HGNC Symbol;Acc:HGNC:7533]
4601	MXI1	MAX interactor 1, dimerization protein [Source:HGNC Symbol;Acc:HGNC:7534]
4733	DRG1	developmentally regulated GTP binding protein 1 [Source:HGNC Symbol;Acc:HGNC:3029]
4811	NID1	nidogen 1 [Source:HGNC Symbol;Acc:HGNC:7821]
4920	ROR2	receptor tyrosine kinase like orphan receptor 2 [Source:HGNC Symbol;Acc:HGNC:10257]
4927	NUP88	nucleoporin 88 [Source:HGNC Symbol;Acc:HGNC:8067]
49854	ZBTB21	zinc finger and BTB domain containing 21 [Source:HGNC Symbol;Acc:HGNC:13083]
5034	P4HB	prolyl 4-hydroxylase subunit beta [Source:HGNC Symbol;Acc:HGNC:8548]
50626	CYHR1	cysteine and histidine rich 1 [Source:HGNC Symbol;Acc:HGNC:17806]
5094	PCBP2	poly(rC) binding protein 2 [Source:HGNC Symbol;Acc:HGNC:8648]
5098	PCDHGC3	protocadherin gamma subfamily C, 3 [Source:HGNC Symbol;Acc:HGNC:8716]
51011	FAHD2A	fumarylacetoacetate hydrolase domain containing 2A [Source:HGNC Symbol;Acc:HGNC:24252]
51018	RRP15	ribosomal RNA processing 15 homolog [Source:HGNC Symbol;Acc:HGNC:24255]
51072	MEMO1	mediator of cell motility 1 [Source:HGNC Symbol;Acc:HGNC:14014]
51150	SDF4	stromal cell derived factor 4 [Source:HGNC Symbol;Acc:HGNC:24188]
51186	TCEAL9	transcription elongation factor A like 9 [Source:HGNC Symbol;Acc:HGNC:30084]
51281	ANKMY1	ankyrin repeat and MYND domain containing 1 [Source:HGNC Symbol;Acc:HGNC:20987]
51306	FAM13B	family with sequence similarity 13 member B [Source:HGNC Symbol;Acc:HGNC:1335]
51329	ARL6IP4	ADP ribosylation factor like GTPase 6 interacting protein 4 [Source:HGNC Symbol;Acc:HGNC:18076]
51398	WDR83OS	WD repeat domain 83 opposite strand [Source:HGNC Symbol;Acc:HGNC:30203]
51537	MTFP1	mitochondrial fission process 1 [Source:HGNC Symbol;Acc:HGNC:26945]
51547	SIRT7	sirtuin 7 [Source:HGNC Symbol;Acc:HGNC:14935]
51585	PCF11	PCF11 cleavage and polyadenylation factor subunit [Source:HGNC Symbol;Acc:HGNC:30097]
51734	MSRB1	methionine sulfoxide reductase B1 [Source:HGNC Symbol;Acc:HGNC:14133]
5201	PFDN1	prefoldin subunit 1 [Source:HGNC Symbol;Acc:HGNC:8866]
5339	PLEC	plectin [Source:HGNC Symbol;Acc:HGNC:9069]
53841	CDHR5	cadherin related family member 5 [Source:HGNC Symbol;Acc:HGNC:7521]
54058	C21orf58	chromosome 21 open reading frame 58 [Source:HGNC Symbol;Acc:HGNC:1300]
54108	CHRAC1	chromatin accessibility complex subunit 1 [Source:HGNC Symbol;Acc:HGNC:13544]
54509	RHOF	ras homolog family member F, filopodia associated [Source:HGNC Symbol;Acc:HGNC:15703]
54556	ING3	inhibitor of growth family member 3 [Source:HGNC Symbol;Acc:HGNC:14587]
54627	MAP10	microtubule associated protein 10 [Source:HGNC Symbol;Acc:HGNC:29265]
54732	TMED9	transmembrane p24 trafficking protein 9 [Source:HGNC Symbol;Acc:HGNC:24878]
54777	CFAP46	cilia and flagella associated protein 46 [Source:HGNC Symbol;Acc:HGNC:25247]
54828	BCAS3	BCAS3 microtubule associated cell migration factor [Source:HGNC Symbol;Acc:HGNC:14347]
54906	TASOR2	transcription activation suppressor family member 2 [Source:HGNC Symbol;Acc:HGNC:23484]
55039	TRMT12	tRNA methyltransferase 12 homolog [Source:HGNC Symbol;Acc:HGNC:26091]
5504	PPP1R2	protein phosphatase 1 regulatory inhibitor subunit 2 [Source:HGNC Symbol;Acc:HGNC:9288]
55082	ARGLU1	arginine and glutamate rich 1 [Source:HGNC Symbol;Acc:HGNC:25482]
5511	PPP1R8	protein phosphatase 1 regulatory subunit 8 [Source:HGNC Symbol;Acc:HGNC:9296]
55181	SMG8	SMG8 nonsense mediated mRNA decay factor [Source:HGNC Symbol;Acc:HGNC:25551]
55227	LRRC1	leucine rich repeat containing 1 [Source:HGNC Symbol;Acc:HGNC:14307]
5524	PTPA	protein phosphatase 2 phosphatase activator [Source:HGNC Symbol;Acc:HGNC:9308]
55251	PCMTD2	protein-L-isoaspartate (D-aspartate) O-methyltransferase domain containing 2 [Source:HGNC Symbol;Acc:HGNC:15882]
55257	MRGBP	MRG domain binding protein [Source:HGNC Symbol;Acc:HGNC:15866]
55316	RSAD1	radical S-adenosyl methionine domain containing 1 [Source:HGNC Symbol;Acc:HGNC:25634]
55361	PI4K2A	phosphatidylinositol 4-kinase type 2 alpha [Source:HGNC Symbol;Acc:HGNC:30031]
55599	RNPC3	RNA binding region (RNP1, RRM) containing 3 [Source:HGNC Symbol;Acc:HGNC:18666]
55602	CDKN2AIP	CDKN2A interacting protein [Source:HGNC Symbol;Acc:HGNC:24325]
55608	ANKRD10	ankyrin repeat domain 10 [Source:HGNC Symbol;Acc:HGNC:20265]
55609	ZNF280C	zinc finger protein 280C [Source:HGNC Symbol;Acc:HGNC:25955]
55661	DDX27	DEAD-box helicase 27 [Source:HGNC Symbol;Acc:HGNC:15837]
55671	PPP4R3A	protein phosphatase 4 regulatory subunit 3A [Source:HGNC Symbol;Acc:HGNC:20219]
55683	KANSL3	KAT8 regulatory NSL complex subunit 3 [Source:HGNC Symbol;Acc:HGNC:25473]
55837	EAPP	E2F associated phosphoprotein [Source:HGNC Symbol;Acc:HGNC:19312]
56121	PCDHB15	protocadherin beta 15 [Source:HGNC Symbol;Acc:HGNC:8686]
5635	PRPSAP1	phosphoribosyl pyrophosphate synthetase associated protein 1 [Source:HGNC Symbol;Acc:HGNC:9466]
56888	KCMF1	potassium channel modulatory factor 1 [Source:HGNC Symbol;Acc:HGNC:20589]
56950	SMYD2	SET and MYND domain containing 2 [Source:HGNC Symbol;Acc:HGNC:20982]
57117	INTS12	integrator complex subunit 12 [Source:HGNC Symbol;Acc:HGNC:25067]
57407	NMRAL1	NmrA like redox sensor 1 [Source:HGNC Symbol;Acc:HGNC:24987]
57409	MIF4GD	MIF4G domain containing [Source:HGNC Symbol;Acc:HGNC:24030]
57513	CASKIN2	CASK interacting protein 2 [Source:HGNC Symbol;Acc:HGNC:18200]
57634	EP400	E1A binding protein p400 [Source:HGNC Symbol;Acc:HGNC:11958]
57642	COL20A1	collagen type XX alpha 1 chain [Source:HGNC Symbol;Acc:HGNC:14670]
58500	ZNF250	zinc finger protein 250 [Source:HGNC Symbol;Acc:HGNC:13044]
58509	CACTIN	cactin, spliceosome C complex subunit [Source:HGNC Symbol;Acc:HGNC:29938]
5911	RAP2A	RAP2A, member of RAS oncogene family [Source:HGNC Symbol;Acc:HGNC:9861]
5956	OPN1LW	opsin 1, long wave sensitive [Source:HGNC Symbol;Acc:HGNC:9936]
6002	RGS12	regulator of G protein signaling 12 [Source:HGNC Symbol;Acc:HGNC:9994]
6046	BRD2	bromodomain containing 2 [Source:HGNC Symbol;Acc:HGNC:1103]
6047	RNF4	ring finger protein 4 [Source:HGNC Symbol;Acc:HGNC:10067]
619189	SERINC4	serine incorporator 4 [Source:HGNC Symbol;Acc:HGNC:32237]
6305	SBF1	SET binding factor 1 [Source:HGNC Symbol;Acc:HGNC:10542]
6398	SECTM1	secreted and transmembrane 1 [Source:HGNC Symbol;Acc:HGNC:10707]
64118	DUS1L	dihydrouridine synthase 1 like [Source:HGNC Symbol;Acc:HGNC:30086]
64122	FN3K	fructosamine 3 kinase [Source:HGNC Symbol;Acc:HGNC:24822]
64151	NCAPG	non-SMC condensin I complex subunit G [Source:HGNC Symbol;Acc:HGNC:24304]
64215	DNAJC1	DnaJ heat shock protein family (Hsp40) member C1 [Source:HGNC Symbol;Acc:HGNC:20090]
642273	FAM110C	family with sequence similarity 110 member C [Source:HGNC Symbol;Acc:HGNC:33340]
642636	RAD21L1	RAD21 cohesin complex component like 1 [Source:HGNC Symbol;Acc:HGNC:16271]
64285	RHBDF1	rhomboid 5 homolog 1 [Source:HGNC Symbol;Acc:HGNC:20561]
644096	SDHAF1	succinate dehydrogenase complex assembly factor 1 [Source:HGNC Symbol;Acc:HGNC:33867]
64599	GIGYF1	GRB10 interacting GYF protein 1 [Source:HGNC Symbol;Acc:HGNC:9126]
64801	ARV1	ARV1 homolog, fatty acid homeostasis modulator [Source:HGNC Symbol;Acc:HGNC:29561]
649	BMP1	bone morphogenetic protein 1 [Source:HGNC Symbol;Acc:HGNC:1067]
65265	C8orf33	chromosome 8 open reading frame 33 [Source:HGNC Symbol;Acc:HGNC:26104]
6584	SLC22A5	solute carrier family 22 member 5 [Source:HGNC Symbol;Acc:HGNC:10969]
663	BNIP2	BCL2 interacting protein 2 [Source:HGNC Symbol;Acc:HGNC:1083]
6651	SON	SON DNA and RNA binding protein [Source:HGNC Symbol;Acc:HGNC:11183]
666	BOK	BCL2 family apoptosis regulator BOK [Source:HGNC Symbol;Acc:HGNC:1087]
6676	SPAG4	sperm associated antigen 4 [Source:HGNC Symbol;Acc:HGNC:11214]
6801	STRN	striatin [Source:HGNC Symbol;Acc:HGNC:11424]
688	KLF5	Kruppel like factor 5 [Source:HGNC Symbol;Acc:HGNC:6349]
6894	TARBP1	TAR (HIV-1) RNA binding protein 1 [Source:HGNC Symbol;Acc:HGNC:11568]
6991	DYNLT2	dynein light chain Tctex-type 2 [Source:HGNC Symbol;Acc:HGNC:11695]
7022	TFAP2C	transcription factor AP-2 gamma [Source:HGNC Symbol;Acc:HGNC:11744]
7077	TIMP2	TIMP metallopeptidase inhibitor 2 [Source:HGNC Symbol;Acc:HGNC:11821]
7107	GPR137B	G protein-coupled receptor 137B [Source:HGNC Symbol;Acc:HGNC:11862]
7165	TPD52L2	TPD52 like 2 [Source:HGNC Symbol;Acc:HGNC:12007]
741	ZNHIT2	zinc finger HIT-type containing 2 [Source:HGNC Symbol;Acc:HGNC:1177]
7528	YY1	YY1 transcription factor [Source:HGNC Symbol;Acc:HGNC:12856]
7593	MZF1	myeloid zinc finger 1 [Source:HGNC Symbol;Acc:HGNC:13108]
7739	ZNF185	zinc finger protein 185 with LIM domain [Source:HGNC Symbol;Acc:HGNC:12976]
7866	IFRD2	interferon related developmental regulator 2 [Source:HGNC Symbol;Acc:HGNC:5457]
79006	METRN	meteorin, glial cell differentiation regulator [Source:HGNC Symbol;Acc:HGNC:14151]
79007	DBNDD1	dysbindin domain containing 1 [Source:HGNC Symbol;Acc:HGNC:28455]
79025	FNDC11	fibronectin type III domain containing 11 [Source:HGNC Symbol;Acc:HGNC:28764]
79080	CCDC86	coiled-coil domain containing 86 [Source:HGNC Symbol;Acc:HGNC:28359]
79092	CARD14	caspase recruitment domain family member 14 [Source:HGNC Symbol;Acc:HGNC:16446]
79157	MFSD11	major facilitator superfamily domain containing 11 [Source:HGNC Symbol;Acc:HGNC:25458]
79169	C1orf35	chromosome 1 open reading frame 35 [Source:HGNC Symbol;Acc:HGNC:19032]
79171	RBM42	RNA binding motif protein 42 [Source:HGNC Symbol;Acc:HGNC:28117]
79412	KREMEN2	kringle containing transmembrane protein 2 [Source:HGNC Symbol;Acc:HGNC:18797]
79609	VCPKMT	valosin containing protein lysine methyltransferase [Source:HGNC Symbol;Acc:HGNC:20352]
79637	ARMC7	armadillo repeat containing 7 [Source:HGNC Symbol;Acc:HGNC:26168]
79751	SLC25A22	solute carrier family 25 member 22 [Source:HGNC Symbol;Acc:HGNC:19954]
79755	ZNF750	zinc finger protein 750 [Source:HGNC Symbol;Acc:HGNC:25843]
79792	GSDMD	gasdermin D [Source:HGNC Symbol;Acc:HGNC:25697]
79811	SLTM	SAFB like transcription modulator [Source:HGNC Symbol;Acc:HGNC:20709]
79815	NIPAL2	NIPA like domain containing 2 [Source:HGNC Symbol;Acc:HGNC:25854]
79856	SNX22	sorting nexin 22 [Source:HGNC Symbol;Acc:HGNC:16315]
79894	ZNF672	zinc finger protein 672 [Source:HGNC Symbol;Acc:HGNC:26179]
79922	MRM1	mitochondrial rRNA methyltransferase 1 [Source:HGNC Symbol;Acc:HGNC:26202]
79957	PAQR6	progestin and adipoQ receptor family member 6 [Source:HGNC Symbol;Acc:HGNC:30132]
79968	WDR76	WD repeat domain 76 [Source:HGNC Symbol;Acc:HGNC:25773]
79977	GRHL2	grainyhead like transcription factor 2 [Source:HGNC Symbol;Acc:HGNC:2799]
8000	PSCA	prostate stem cell antigen [Source:HGNC Symbol;Acc:HGNC:9500]
80003	PCNX2	pecanex 2 [Source:HGNC Symbol;Acc:HGNC:8736]
80185	TTI2	TELO2 interacting protein 2 [Source:HGNC Symbol;Acc:HGNC:26262]
80195	TMEM254	transmembrane protein 254 [Source:HGNC Symbol;Acc:HGNC:25804]
80233	FAAP100	FA core complex associated protein 100 [Source:HGNC Symbol;Acc:HGNC:26171]
80237	ELL3	elongation factor for RNA polymerase II 3 [Source:HGNC Symbol;Acc:HGNC:23113]
80774	LIMD2	LIM domain containing 2 [Source:HGNC Symbol;Acc:HGNC:28142]
80851	SH3BP5L	SH3 binding domain protein 5 like [Source:HGNC Symbol;Acc:HGNC:29360]
8087	FXR1	FMR1 autosomal homolog 1 [Source:HGNC Symbol;Acc:HGNC:4023]
80895	ILKAP	ILK associated serine/threonine phosphatase [Source:HGNC Symbol;Acc:HGNC:15566]
8106	PABPN1	poly(A) binding protein nuclear 1 [Source:HGNC Symbol;Acc:HGNC:8565]
8140	SLC7A5	solute carrier family 7 member 5 [Source:HGNC Symbol;Acc:HGNC:11063]
81502	HM13	histocompatibility minor 13 [Source:HGNC Symbol;Acc:HGNC:16435]
81552	VOPP1	VOPP1 WW domain binding protein [Source:HGNC Symbol;Acc:HGNC:34518]
81575	APOLD1	apolipoprotein L domain containing 1 [Source:HGNC Symbol;Acc:HGNC:25268]
81576	CCDC130	coiled-coil domain containing 130 [Source:HGNC Symbol;Acc:HGNC:28118]
81608	FIP1L1	factor interacting with PAPOLA and CPSF1 [Source:HGNC Symbol;Acc:HGNC:19124]
8161	COIL	coilin [Source:HGNC Symbol;Acc:HGNC:2184]
81611	ANP32E	acidic nuclear phosphoprotein 32 family member E [Source:HGNC Symbol;Acc:HGNC:16673]
81858	SHARPIN	SHANK associated RH domain interactor [Source:HGNC Symbol;Acc:HGNC:25321]
8241	RBM10	RNA binding motif protein 10 [Source:HGNC Symbol;Acc:HGNC:9896]
83451	ABHD11	abhydrolase domain containing 11 [Source:HGNC Symbol;Acc:HGNC:16407]
83548	COG3	component of oligomeric golgi complex 3 [Source:HGNC Symbol;Acc:HGNC:18619]
83715	ESPN	espin [Source:HGNC Symbol;Acc:HGNC:13281]
84060	RBM48	RNA binding motif protein 48 [Source:HGNC Symbol;Acc:HGNC:21785]
84062	DTNBP1	dystrobrevin binding protein 1 [Source:HGNC Symbol;Acc:HGNC:17328]
84219	WDR24	WD repeat domain 24 [Source:HGNC Symbol;Acc:HGNC:20852]
84268	RPAIN	RPA interacting protein [Source:HGNC Symbol;Acc:HGNC:28641]
84299	MIEN1	migration and invasion enhancer 1 [Source:HGNC Symbol;Acc:HGNC:28230]
84326	METTL26	methyltransferase like 26 [Source:HGNC Symbol;Acc:HGNC:14141]
84342	COG8	component of oligomeric golgi complex 8 [Source:HGNC Symbol;Acc:HGNC:18623]
84733	CBX2	chromobox 2 [Source:HGNC Symbol;Acc:HGNC:1552]
84811	BUD13	BUD13 homolog [Source:HGNC Symbol;Acc:HGNC:28199]
84833	ATP5MD	ATP synthase membrane subunit DAPIT [Source:HGNC Symbol;Acc:HGNC:30889]
84851	TRIM52	tripartite motif containing 52 [Source:HGNC Symbol;Acc:HGNC:19024]
84878	ZBTB45	zinc finger and BTB domain containing 45 [Source:HGNC Symbol;Acc:HGNC:23715]
84893	FBH1	F-box DNA helicase 1 [Source:HGNC Symbol;Acc:HGNC:13620]
84919	PPP1R15B	protein phosphatase 1 regulatory subunit 15B [Source:HGNC Symbol;Acc:HGNC:14951]
85007	PHYKPL	5-phosphohydroxy-L-lysine phospho-lyase [Source:HGNC Symbol;Acc:HGNC:28249]
85302	FBF1	Fas binding factor 1 [Source:HGNC Symbol;Acc:HGNC:24674]
8880	FUBP1	far upstream element binding protein 1 [Source:HGNC Symbol;Acc:HGNC:4004]
8906	AP1G2	adaptor related protein complex 1 subunit gamma 2 [Source:HGNC Symbol;Acc:HGNC:556]
8938	BAIAP3	BAI1 associated protein 3 [Source:HGNC Symbol;Acc:HGNC:948]
9027	NAT8	N-acetyltransferase 8 (putative) [Source:HGNC Symbol;Acc:HGNC:18069]
90326	THAP3	THAP domain containing 3 [Source:HGNC Symbol;Acc:HGNC:20855]
90673	PPP1R3E	protein phosphatase 1 regulatory subunit 3E [Source:HGNC Symbol;Acc:HGNC:14943]
90861	JPT2	Jupiter microtubule associated homolog 2 [Source:HGNC Symbol;Acc:HGNC:14137]
90956	ADCK2	aarF domain containing kinase 2 [Source:HGNC Symbol;Acc:HGNC:19039]
91107	TRIM47	tripartite motif containing 47 [Source:HGNC Symbol;Acc:HGNC:19020]
91227	GGTLC2	gamma-glutamyltransferase light chain 2 [Source:HGNC Symbol;Acc:HGNC:18596]
9123	SLC16A3	solute carrier family 16 member 3 [Source:HGNC Symbol;Acc:HGNC:10924]
91368	CDKN2AIPNL	CDKN2A interacting protein N-terminal like [Source:HGNC Symbol;Acc:HGNC:30545]
91369	ANKRD40	ankyrin repeat domain 40 [Source:HGNC Symbol;Acc:HGNC:28233]
9147	NEMF	nuclear export mediator factor [Source:HGNC Symbol;Acc:HGNC:10663]
92714	ARRDC1	arrestin domain containing 1 [Source:HGNC Symbol;Acc:HGNC:28633]
9277	WDR46	WD repeat domain 46 [Source:HGNC Symbol;Acc:HGNC:13923]
9333	TGM5	transglutaminase 5 [Source:HGNC Symbol;Acc:HGNC:11781]
9375	TM9SF2	transmembrane 9 superfamily member 2 [Source:HGNC Symbol;Acc:HGNC:11865]
94081	SFXN1	sideroflexin 1 [Source:HGNC Symbol;Acc:HGNC:16085]
9521	EEF1E1	eukaryotic translation elongation factor 1 epsilon 1 [Source:HGNC Symbol;Acc:HGNC:3212]
9582	APOBEC3B	apolipoprotein B mRNA editing enzyme catalytic subunit 3B [Source:HGNC Symbol;Acc:HGNC:17352]
9584	RBM39	RNA binding motif protein 39 [Source:HGNC Symbol;Acc:HGNC:15923]
9728	SECISBP2L	SECIS binding protein 2 like [Source:HGNC Symbol;Acc:HGNC:28997]
9751	SNPH	syntaphilin [Source:HGNC Symbol;Acc:HGNC:15931]
9759	HDAC4	histone deacetylase 4 [Source:HGNC Symbol;Acc:HGNC:14063]
9772	TMEM94	transmembrane protein 94 [Source:HGNC Symbol;Acc:HGNC:28983]
9774	BCLAF1	BCL2 associated transcription factor 1 [Source:HGNC Symbol;Acc:HGNC:16863]
9852	EPM2AIP1	EPM2A interacting protein 1 [Source:HGNC Symbol;Acc:HGNC:19735]
9929	JOSD1	Josephin domain containing 1 [Source:HGNC Symbol;Acc:HGNC:28953]
9931	HELZ	helicase with zinc finger [Source:HGNC Symbol;Acc:HGNC:16878]

## Sheet: Figure 3B
Overlap Results
Collection(s):	CP:KEGG
# overlaps shown:	12
# genesets in collections:	186
# genes in comparison (n):	492
# genes in universe (N):	40312
Gene Set Name	# Genes in Gene Set (K)	Description	# Genes in Overlap (k)	k/K	p-value	FDR q-value
KEGG_PARKINSONS_DISEASE	130	Parkinson's disease	16	0.1231	6.46e-12	1.2e-09
KEGG_OXIDATIVE_PHOSPHORYLATION	132	Oxidative phosphorylation	14	0.1061	9.98e-10	6.44e-08
KEGG_HUNTINGTONS_DISEASE	182	Huntington's disease	16	0.0879	1.05e-09	6.44e-08
KEGG_AMINOACYL_TRNA_BIOSYNTHESIS	41	Aminoacyl-tRNA biosynthesis	9	0.2195	1.38e-09	6.44e-08
KEGG_ALZHEIMERS_DISEASE	166	Alzheimer's disease	14	0.0843	1.97e-08	7.33e-07
KEGG_CELL_CYCLE	125	Cell cycle	8	0.064	0.000157	0.00488
KEGG_VALINE_LEUCINE_AND_ISOLEUCINE_BIOSYNTHESIS	11	Valine, leucine and isoleucine biosynthesis	3	0.2727	0.000277	0.00737
KEGG_RNA_DEGRADATION	59	RNA degradation	5	0.0847	0.000772	0.0176
KEGG_BASAL_TRANSCRIPTION_FACTORS	35	Basal transcription factors	4	0.1143	0.00085	0.0176
KEGG_NUCLEOTIDE_EXCISION_REPAIR	44	Nucleotide excision repair	4	0.0909	0.00202	0.0376
KEGG_CHEMOKINE_SIGNALING_PATHWAY	189	Chemokine signaling pathway	8	0.0423	0.00237	0.0401
KEGG_MISMATCH_REPAIR	23	Mismatch repair	3	0.1304	0.00267	0.0414
Gene/Gene Set Overlap Matrix
Entrez Gene Id	Gene Symbol	Gene Description	KEGG_PARKINSONS_DISEASE	KEGG_OXIDATIVE_PHOSPHORYLATION	KEGG_HUNTINGTONS_DISEASE	KEGG_AMINOACYL_TRNA_BIOSYNTHESIS	KEGG_ALZHEIMERS_DISEASE	KEGG_CELL_CYCLE	KEGG_VALINE_LEUCINE_AND_ISOLEUCINE_BIOSYNTHESIS	KEGG_RNA_DEGRADATION	KEGG_BASAL_TRANSCRIPTION_FACTORS	KEGG_NUCLEOTIDE_EXCISION_REPAIR	KEGG_CHEMOKINE_SIGNALING_PATHWAY	KEGG_MISMATCH_REPAIR
1340	COX6B1	cytochrome c oxidase subunit 6B1 [Source:HGNC Symbol;Acc:HGNC:2280]	KEGG_PARKINSONS_DISEASE	KEGG_OXIDATIVE_PHOSPHORYLATION	KEGG_HUNTINGTONS_DISEASE		KEGG_ALZHEIMERS_DISEASE
7385	UQCRC2	ubiquinol-cytochrome c reductase core protein 2 [Source:HGNC Symbol;Acc:HGNC:12586]	KEGG_PARKINSONS_DISEASE	KEGG_OXIDATIVE_PHOSPHORYLATION	KEGG_HUNTINGTONS_DISEASE		KEGG_ALZHEIMERS_DISEASE
10476	ATP5PD	ATP synthase peripheral stalk subunit d [Source:HGNC Symbol;Acc:HGNC:845]	KEGG_PARKINSONS_DISEASE	KEGG_OXIDATIVE_PHOSPHORYLATION	KEGG_HUNTINGTONS_DISEASE		KEGG_ALZHEIMERS_DISEASE
374291	NDUFS7	NADH:ubiquinone oxidoreductase core subunit S7 [Source:HGNC Symbol;Acc:HGNC:7714]	KEGG_PARKINSONS_DISEASE	KEGG_OXIDATIVE_PHOSPHORYLATION	KEGG_HUNTINGTONS_DISEASE		KEGG_ALZHEIMERS_DISEASE
4697	NDUFA4	NDUFA4 mitochondrial complex associated [Source:HGNC Symbol;Acc:HGNC:7687]	KEGG_PARKINSONS_DISEASE	KEGG_OXIDATIVE_PHOSPHORYLATION	KEGG_HUNTINGTONS_DISEASE		KEGG_ALZHEIMERS_DISEASE
4704	NDUFA9	NADH:ubiquinone oxidoreductase subunit A9 [Source:HGNC Symbol;Acc:HGNC:7693]	KEGG_PARKINSONS_DISEASE	KEGG_OXIDATIVE_PHOSPHORYLATION	KEGG_HUNTINGTONS_DISEASE		KEGG_ALZHEIMERS_DISEASE
4705	NDUFA10	NADH:ubiquinone oxidoreductase subunit A10 [Source:HGNC Symbol;Acc:HGNC:7684]	KEGG_PARKINSONS_DISEASE	KEGG_OXIDATIVE_PHOSPHORYLATION	KEGG_HUNTINGTONS_DISEASE		KEGG_ALZHEIMERS_DISEASE
4709	NDUFB3	NADH:ubiquinone oxidoreductase subunit B3 [Source:HGNC Symbol;Acc:HGNC:7698]	KEGG_PARKINSONS_DISEASE	KEGG_OXIDATIVE_PHOSPHORYLATION	KEGG_HUNTINGTONS_DISEASE		KEGG_ALZHEIMERS_DISEASE
4711	NDUFB5	NADH:ubiquinone oxidoreductase subunit B5 [Source:HGNC Symbol;Acc:HGNC:7700]	KEGG_PARKINSONS_DISEASE	KEGG_OXIDATIVE_PHOSPHORYLATION	KEGG_HUNTINGTONS_DISEASE		KEGG_ALZHEIMERS_DISEASE
4723	NDUFV1	NADH:ubiquinone oxidoreductase core subunit V1 [Source:HGNC Symbol;Acc:HGNC:7716]	KEGG_PARKINSONS_DISEASE	KEGG_OXIDATIVE_PHOSPHORYLATION	KEGG_HUNTINGTONS_DISEASE		KEGG_ALZHEIMERS_DISEASE
4729	NDUFV2	NADH:ubiquinone oxidoreductase core subunit V2 [Source:HGNC Symbol;Acc:HGNC:7717]	KEGG_PARKINSONS_DISEASE	KEGG_OXIDATIVE_PHOSPHORYLATION	KEGG_HUNTINGTONS_DISEASE		KEGG_ALZHEIMERS_DISEASE
498	ATP5F1A	ATP synthase F1 subunit alpha [Source:HGNC Symbol;Acc:HGNC:823]	KEGG_PARKINSONS_DISEASE	KEGG_OXIDATIVE_PHOSPHORYLATION	KEGG_HUNTINGTONS_DISEASE		KEGG_ALZHEIMERS_DISEASE
515	ATP5PB	ATP synthase peripheral stalk-membrane subunit b [Source:HGNC Symbol;Acc:HGNC:840]	KEGG_PARKINSONS_DISEASE	KEGG_OXIDATIVE_PHOSPHORYLATION	KEGG_HUNTINGTONS_DISEASE		KEGG_ALZHEIMERS_DISEASE
51465	UBE2J1	ubiquitin conjugating enzyme E2 J1 [Source:HGNC Symbol;Acc:HGNC:17598]	KEGG_PARKINSONS_DISEASE
7332	UBE2L3	ubiquitin conjugating enzyme E2 L3 [Source:HGNC Symbol;Acc:HGNC:12488]	KEGG_PARKINSONS_DISEASE
9246	UBE2L6	ubiquitin conjugating enzyme E2 L6 [Source:HGNC Symbol;Acc:HGNC:12490]	KEGG_PARKINSONS_DISEASE
5464	PPA1	inorganic pyrophosphatase 1 [Source:HGNC Symbol;Acc:HGNC:9226]		KEGG_OXIDATIVE_PHOSPHORYLATION
581	BAX	BCL2 associated X, apoptosis regulator [Source:HGNC Symbol;Acc:HGNC:959]			KEGG_HUNTINGTONS_DISEASE
1639	DCTN1	dynactin subunit 1 [Source:HGNC Symbol;Acc:HGNC:2711]			KEGG_HUNTINGTONS_DISEASE
27019	DNAI1	dynein axonemal intermediate chain 1 [Source:HGNC Symbol;Acc:HGNC:2954]			KEGG_HUNTINGTONS_DISEASE
23395	LARS2	leucyl-tRNA synthetase 2, mitochondrial [Source:HGNC Symbol;Acc:HGNC:17095]				KEGG_AMINOACYL_TRNA_BIOSYNTHESIS			KEGG_VALINE_LEUCINE_AND_ISOLEUCINE_BIOSYNTHESIS
51520	LARS1	leucyl-tRNA synthetase 1 [Source:HGNC Symbol;Acc:HGNC:6512]				KEGG_AMINOACYL_TRNA_BIOSYNTHESIS			KEGG_VALINE_LEUCINE_AND_ISOLEUCINE_BIOSYNTHESIS
10352	WARS2	tryptophanyl tRNA synthetase 2, mitochondrial [Source:HGNC Symbol;Acc:HGNC:12730]				KEGG_AMINOACYL_TRNA_BIOSYNTHESIS
4677	NARS1	asparaginyl-tRNA synthetase 1 [Source:HGNC Symbol;Acc:HGNC:7643]				KEGG_AMINOACYL_TRNA_BIOSYNTHESIS
5917	RARS1	arginyl-tRNA synthetase 1 [Source:HGNC Symbol;Acc:HGNC:9870]				KEGG_AMINOACYL_TRNA_BIOSYNTHESIS
6897	TARS1	threonyl-tRNA synthetase 1 [Source:HGNC Symbol;Acc:HGNC:11572]				KEGG_AMINOACYL_TRNA_BIOSYNTHESIS
79587	CARS2	cysteinyl-tRNA synthetase 2, mitochondrial [Source:HGNC Symbol;Acc:HGNC:25695]				KEGG_AMINOACYL_TRNA_BIOSYNTHESIS
79731	NARS2	asparaginyl-tRNA synthetase 2, mitochondrial [Source:HGNC Symbol;Acc:HGNC:26274]				KEGG_AMINOACYL_TRNA_BIOSYNTHESIS
8565	YARS1	tyrosyl-tRNA synthetase 1 [Source:HGNC Symbol;Acc:HGNC:12840]				KEGG_AMINOACYL_TRNA_BIOSYNTHESIS
2597	GAPDH	glyceraldehyde-3-phosphate dehydrogenase [Source:HGNC Symbol;Acc:HGNC:4141]					KEGG_ALZHEIMERS_DISEASE
7531	YWHAE	tyrosine 3-monooxygenase/tryptophan 5-monooxygenase activation protein epsilon [Source:HGNC Symbol;Acc:HGNC:12851]						KEGG_CELL_CYCLE
10393	ANAPC10	anaphase promoting complex subunit 10 [Source:HGNC Symbol;Acc:HGNC:24077]						KEGG_CELL_CYCLE
6500	SKP1	S-phase kinase associated protein 1 [Source:HGNC Symbol;Acc:HGNC:10899]						KEGG_CELL_CYCLE
8243	SMC1A	structural maintenance of chromosomes 1A [Source:HGNC Symbol;Acc:HGNC:11111]						KEGG_CELL_CYCLE
23595	ORC3	origin recognition complex subunit 3 [Source:HGNC Symbol;Acc:HGNC:8489]						KEGG_CELL_CYCLE
4999	ORC2	origin recognition complex subunit 2 [Source:HGNC Symbol;Acc:HGNC:8488]						KEGG_CELL_CYCLE
5001	ORC5	origin recognition complex subunit 5 [Source:HGNC Symbol;Acc:HGNC:8491]						KEGG_CELL_CYCLE
7272	TTK	TTK protein kinase [Source:HGNC Symbol;Acc:HGNC:12401]						KEGG_CELL_CYCLE
587	BCAT2	branched chain amino acid transaminase 2 [Source:HGNC Symbol;Acc:HGNC:977]							KEGG_VALINE_LEUCINE_AND_ISOLEUCINE_BIOSYNTHESIS
11157	LSM 6.00	LSM6 homolog, U6 small nuclear RNA and mRNA degradation associated [Source:HGNC Symbol;Acc:HGNC:17017]								KEGG_RNA_DEGRADATION
10438	C1D	C1D nuclear receptor corepressor [Source:HGNC Symbol;Acc:HGNC:29911]								KEGG_RNA_DEGRADATION
5393	EXOSC9	exosome component 9 [Source:HGNC Symbol;Acc:HGNC:9137]								KEGG_RNA_DEGRADATION
56915	EXOSC5	exosome component 5 [Source:HGNC Symbol;Acc:HGNC:24662]								KEGG_RNA_DEGRADATION
6499	SKIV2L	Ski2 like RNA helicase [Source:HGNC Symbol;Acc:HGNC:10898]								KEGG_RNA_DEGRADATION
2967	GTF2H3	general transcription factor IIH subunit 3 [Source:HGNC Symbol;Acc:HGNC:4657]									KEGG_BASAL_TRANSCRIPTION_FACTORS	KEGG_NUCLEOTIDE_EXCISION_REPAIR
2960	GTF2E1	general transcription factor IIE subunit 1 [Source:HGNC Symbol;Acc:HGNC:4650]									KEGG_BASAL_TRANSCRIPTION_FACTORS
2962	GTF2F1	general transcription factor IIF subunit 1 [Source:HGNC Symbol;Acc:HGNC:4652]									KEGG_BASAL_TRANSCRIPTION_FACTORS
6883	TAF12	TATA-box binding protein associated factor 12 [Source:HGNC Symbol;Acc:HGNC:11545]									KEGG_BASAL_TRANSCRIPTION_FACTORS
5981	RFC1	replication factor C subunit 1 [Source:HGNC Symbol;Acc:HGNC:9969]										KEGG_NUCLEOTIDE_EXCISION_REPAIR		KEGG_MISMATCH_REPAIR
5984	RFC4	replication factor C subunit 4 [Source:HGNC Symbol;Acc:HGNC:9972]										KEGG_NUCLEOTIDE_EXCISION_REPAIR		KEGG_MISMATCH_REPAIR
5985	RFC5	replication factor C subunit 5 [Source:HGNC Symbol;Acc:HGNC:9973]										KEGG_NUCLEOTIDE_EXCISION_REPAIR		KEGG_MISMATCH_REPAIR
2920	CXCL2	C-X-C motif chemokine ligand 2 [Source:HGNC Symbol;Acc:HGNC:4603]											KEGG_CHEMOKINE_SIGNALING_PATHWAY
6354	CCL7	C-C motif chemokine ligand 7 [Source:HGNC Symbol;Acc:HGNC:10634]											KEGG_CHEMOKINE_SIGNALING_PATHWAY
6357	CCL13	C-C motif chemokine ligand 13 [Source:HGNC Symbol;Acc:HGNC:10611]											KEGG_CHEMOKINE_SIGNALING_PATHWAY
4283	CXCL9	C-X-C motif chemokine ligand 9 [Source:HGNC Symbol;Acc:HGNC:7098]											KEGG_CHEMOKINE_SIGNALING_PATHWAY
6361	CCL17	C-C motif chemokine ligand 17 [Source:HGNC Symbol;Acc:HGNC:10615]											KEGG_CHEMOKINE_SIGNALING_PATHWAY
6372	CXCL6	C-X-C motif chemokine ligand 6 [Source:HGNC Symbol;Acc:HGNC:10643]											KEGG_CHEMOKINE_SIGNALING_PATHWAY
6374	CXCL5	C-X-C motif chemokine ligand 5 [Source:HGNC Symbol;Acc:HGNC:10642]											KEGG_CHEMOKINE_SIGNALING_PATHWAY
5908	RAP1B	RAP1B, member of RAS oncogene family [Source:HGNC Symbol;Acc:HGNC:9857]											KEGG_CHEMOKINE_SIGNALING_PATHWAY
941	CD80	CD80 molecule [Source:HGNC Symbol;Acc:HGNC:1700]
942	CD86	CD86 molecule [Source:HGNC Symbol;Acc:HGNC:1705]
3109	HLA-DMB	major histocompatibility complex, class II, DM beta [Source:HGNC Symbol;Acc:HGNC:4935]
1081	CGA	glycoprotein hormones, alpha polypeptide [Source:HGNC Symbol;Acc:HGNC:1885]
11128	POLR3A	RNA polymerase III subunit A [Source:HGNC Symbol;Acc:HGNC:30074]
51082	POLR1D	RNA polymerase I and III subunit D [Source:HGNC Symbol;Acc:HGNC:20422]
11035	RIPK3	receptor interacting serine/threonine kinase 3 [Source:HGNC Symbol;Acc:HGNC:10021]
9447	AIM2	absent in melanoma 2 [Source:HGNC Symbol;Acc:HGNC:357]
84172	POLR1B	RNA polymerase I subunit B [Source:HGNC Symbol;Acc:HGNC:20454]
3952	LEP	leptin [Source:HGNC Symbol;Acc:HGNC:6553]
1435	CSF1	colony stimulating factor 1 [Source:HGNC Symbol;Acc:HGNC:2432]
5602	MAPK10	mitogen-activated protein kinase 10 [Source:HGNC Symbol;Acc:HGNC:6872]
730	C7	complement C7 [Source:HGNC Symbol;Acc:HGNC:1346]
731	C8A	complement C8 alpha chain [Source:HGNC Symbol;Acc:HGNC:1352]
6741	SSB	small RNA binding exonuclease protection factor La [Source:HGNC Symbol;Acc:HGNC:11316]
623	BDKRB1	bradykinin receptor B1 [Source:HGNC Symbol;Acc:HGNC:1029]
462	SERPINC1	serpin family C member 1 [Source:HGNC Symbol;Acc:HGNC:775]
6783	SULT1E1	sulfotransferase family 1E member 1 [Source:HGNC Symbol;Acc:HGNC:11377]
6821	SUOX	sulfite oxidase [Source:HGNC Symbol;Acc:HGNC:11460]
54	ACP5	acid phosphatase 5, tartrate resistant [Source:HGNC Symbol;Acc:HGNC:124]
55	ACP3	acid phosphatase 3 [Source:HGNC Symbol;Acc:HGNC:125]
5682	PSMA1	proteasome 20S subunit alpha 1 [Source:HGNC Symbol;Acc:HGNC:9530]
5683	PSMA2	proteasome 20S subunit alpha 2 [Source:HGNC Symbol;Acc:HGNC:9531]
5700	PSMC1	proteasome 26S subunit, ATPase 1 [Source:HGNC Symbol;Acc:HGNC:9547]
5737	PTGFR	prostaglandin F receptor [Source:HGNC Symbol;Acc:HGNC:9600]
10203	CALCRL	calcitonin receptor like receptor [Source:HGNC Symbol;Acc:HGNC:16709]
1141	CHRNB2	cholinergic receptor nicotinic beta 2 subunit [Source:HGNC Symbol;Acc:HGNC:1962]
2692	GHRHR	growth hormone releasing hormone receptor [Source:HGNC Symbol;Acc:HGNC:4266]
4544	MTNR1B	melatonin receptor 1B [Source:HGNC Symbol;Acc:HGNC:7464]
4803	NGF	nerve growth factor [Source:HGNC Symbol;Acc:HGNC:7808]
1491	CTH	cystathionine gamma-lyase [Source:HGNC Symbol;Acc:HGNC:2501]
440	ASNS	asparagine synthetase (glutamine-hydrolyzing) [Source:HGNC Symbol;Acc:HGNC:753]
8789	FBP2	fructose-bisphosphatase 2 [Source:HGNC Symbol;Acc:HGNC:3607]
5213	PFKM	phosphofructokinase, muscle [Source:HGNC Symbol;Acc:HGNC:8877]
5149	PDE6H	phosphodiesterase 6H [Source:HGNC Symbol;Acc:HGNC:8790]
55811	ADCY10	adenylate cyclase 10 [Source:HGNC Symbol;Acc:HGNC:21285]
10645	CAMKK2	calcium/calmodulin dependent protein kinase kinase 2 [Source:HGNC Symbol;Acc:HGNC:1470]
1582	CYP8B1	cytochrome P450 family 8 subfamily B member 1 [Source:HGNC Symbol;Acc:HGNC:2653]
2168	FABP1	fatty acid binding protein 1 [Source:HGNC Symbol;Acc:HGNC:3555]
336	APOA2	apolipoprotein A2 [Source:HGNC Symbol;Acc:HGNC:601]
2946	GSTM2	glutathione S-transferase mu 2 [Source:HGNC Symbol;Acc:HGNC:4634]
2949	GSTM5	glutathione S-transferase mu 5 [Source:HGNC Symbol;Acc:HGNC:4637]
7364	UGT2B7	UDP glucuronosyltransferase family 2 member B7 [Source:HGNC Symbol;Acc:HGNC:12554]
1610	DAO	D-amino acid oxidase [Source:HGNC Symbol;Acc:HGNC:2671]
445	ASS1	argininosuccinate synthase 1 [Source:HGNC Symbol;Acc:HGNC:758]
3678	ITGA5	integrin subunit alpha 5 [Source:HGNC Symbol;Acc:HGNC:6141]
3679	ITGA7	integrin subunit alpha 7 [Source:HGNC Symbol;Acc:HGNC:6143]
2697	GJA1	gap junction protein alpha 1 [Source:HGNC Symbol;Acc:HGNC:4274]
55753	OGDHL	oxoglutarate dehydrogenase L [Source:HGNC Symbol;Acc:HGNC:25590]
440138	ALG11	ALG11 alpha-1,2-mannosyltransferase [Source:HGNC Symbol;Acc:HGNC:32456]
7841	MOGS	mannosyl-oligosaccharide glucosidase [Source:HGNC Symbol;Acc:HGNC:24862]
10683	DLL3	delta like canonical Notch ligand 3 [Source:HGNC Symbol;Acc:HGNC:2909]
196403	DTX3	deltex E3 ubiquitin ligase 3 [Source:HGNC Symbol;Acc:HGNC:24457]
26291	FGF21	fibroblast growth factor 21 [Source:HGNC Symbol;Acc:HGNC:3678]
3681	ITGAD	integrin subunit alpha D [Source:HGNC Symbol;Acc:HGNC:6146]
145226	RDH12	retinol dehydrogenase 12 [Source:HGNC Symbol;Acc:HGNC:19977]
51246	SHISA5	shisa family member 5 [Source:HGNC Symbol;Acc:HGNC:30376]
220988	HNRNPA3	heterogeneous nuclear ribonucleoprotein A3 [Source:HGNC Symbol;Acc:HGNC:24941]
57461	ISY1	ISY1 splicing factor homolog [Source:HGNC Symbol;Acc:HGNC:29201]
260425	MAGI3	membrane associated guanylate kinase, WW and PDZ domain containing 3 [Source:HGNC Symbol;Acc:HGNC:29647]
57530	CGN	cingulin [Source:HGNC Symbol;Acc:HGNC:17429]
8189	SYMPK	symplekin [Source:HGNC Symbol;Acc:HGNC:22935]
6217	RPS16	ribosomal protein S16 [Source:HGNC Symbol;Acc:HGNC:10396]
6228	RPS23	ribosomal protein S23 [Source:HGNC Symbol;Acc:HGNC:10410]
6775	STAT4	signal transducer and activator of transcription 4 [Source:HGNC Symbol;Acc:HGNC:11365]
9655	SOCS5	suppressor of cytokine signaling 5 [Source:HGNC Symbol;Acc:HGNC:16852]
58511	DNASE2B	deoxyribonuclease 2 beta [Source:HGNC Symbol;Acc:HGNC:28875]
10500	SEMA6C	semaphorin 6C [Source:HGNC Symbol;Acc:HGNC:10740]
2046	EPHA8	EPH receptor A8 [Source:HGNC Symbol;Acc:HGNC:3391]
51652	CHMP3	charged multivesicular body protein 3 [Source:HGNC Symbol;Acc:HGNC:29865]
60682	SMAP1	small ArfGAP 1 [Source:HGNC Symbol;Acc:HGNC:19651]
1261	CNGA3	cyclic nucleotide gated channel subunit alpha 3 [Source:HGNC Symbol;Acc:HGNC:2150]
7535	ZAP70	zeta chain of T cell receptor associated protein kinase 70 [Source:HGNC Symbol;Acc:HGNC:12858]
81607	NECTIN4	nectin cell adhesion molecule 4 [Source:HGNC Symbol;Acc:HGNC:19688]
3875	KRT18	keratin 18 [Source:HGNC Symbol;Acc:HGNC:6430]
24	ABCA4	ATP binding cassette subfamily A member 4 [Source:HGNC Symbol;Acc:HGNC:34]
27159	CHIA	chitinase acidic [Source:HGNC Symbol;Acc:HGNC:17432]
662	BNIP1	BCL2 interacting protein 1 [Source:HGNC Symbol;Acc:HGNC:1082]
11226	GALNT6	polypeptide N-acetylgalactosaminyltransferase 6 [Source:HGNC Symbol;Acc:HGNC:4128]
10690	FUT9	fucosyltransferase 9 [Source:HGNC Symbol;Acc:HGNC:4020]
3171	FOXA3	forkhead box A3 [Source:HGNC Symbol;Acc:HGNC:5023]
6729	SRP54	signal recognition particle 54 [Source:HGNC Symbol;Acc:HGNC:11301]
8534	CHST1	carbohydrate sulfotransferase 1 [Source:HGNC Symbol;Acc:HGNC:1969]
9453	GGPS1	geranylgeranyl diphosphate synthase 1 [Source:HGNC Symbol;Acc:HGNC:4249]
7520	XRCC5	X-ray repair cross complementing 5 [Source:HGNC Symbol;Acc:HGNC:12833]
51380	CSAD	cysteine sulfinic acid decarboxylase [Source:HGNC Symbol;Acc:HGNC:18966]
100129583	FAM47E	family with sequence similarity 47 member E [Source:HGNC Symbol;Acc:HGNC:34343]
100381270	ZBED6	zinc finger BED-type containing 6 [Source:HGNC Symbol;Acc:HGNC:33273]
10044	SH2D3C	SH2 domain containing 3C [Source:HGNC Symbol;Acc:HGNC:16884]
10113	PREB	prolactin regulatory element binding [Source:HGNC Symbol;Acc:HGNC:9356]
10117	ENAM	enamelin [Source:HGNC Symbol;Acc:HGNC:3344]
10171	RCL1	RNA terminal phosphate cyclase like 1 [Source:HGNC Symbol;Acc:HGNC:17687]
10190	TXNDC9	thioredoxin domain containing 9 [Source:HGNC Symbol;Acc:HGNC:24110]
101928601	MEI4	meiotic double-stranded break formation protein 4 [Source:HGNC Symbol;Acc:HGNC:43638]
1025	CDK9	cyclin dependent kinase 9 [Source:HGNC Symbol;Acc:HGNC:1780]
10404	CPQ	carboxypeptidase Q [Source:HGNC Symbol;Acc:HGNC:16910]
10469	TIMM44	translocase of inner mitochondrial membrane 44 [Source:HGNC Symbol;Acc:HGNC:17316]
10485	MIR9-1HG	MIR9-1 host gene [Source:HGNC Symbol;Acc:HGNC:30780]
10499	NCOA2	nuclear receptor coactivator 2 [Source:HGNC Symbol;Acc:HGNC:7669]
10557	RPP38	ribonuclease P/MRP subunit p38 [Source:HGNC Symbol;Acc:HGNC:30329]
1060	CENPC	centromere protein C [Source:HGNC Symbol;Acc:HGNC:1854]
10640	EXOC5	exocyst complex component 5 [Source:HGNC Symbol;Acc:HGNC:10696]
10813	UTP14A	UTP14A small subunit processome component [Source:HGNC Symbol;Acc:HGNC:10665]
10879	SMR3B	submaxillary gland androgen regulated protein 3B [Source:HGNC Symbol;Acc:HGNC:17326]
10885	WDR3	WD repeat domain 3 [Source:HGNC Symbol;Acc:HGNC:12755]
10887	PROKR1	prokineticin receptor 1 [Source:HGNC Symbol;Acc:HGNC:4524]
1104	RCC1	regulator of chromosome condensation 1 [Source:HGNC Symbol;Acc:HGNC:1913]
11130	ZWINT	ZW10 interacting kinetochore protein [Source:HGNC Symbol;Acc:HGNC:13195]
11145	PLAAT3	phospholipase A and acyltransferase 3 [Source:HGNC Symbol;Acc:HGNC:17825]
11218	DDX20	DEAD-box helicase 20 [Source:HGNC Symbol;Acc:HGNC:2743]
11222	MRPL3	mitochondrial ribosomal protein L3 [Source:HGNC Symbol;Acc:HGNC:10379]
114821	ZBED9	zinc finger BED-type containing 9 [Source:HGNC Symbol;Acc:HGNC:13851]
115004	CGAS	cyclic GMP-AMP synthase [Source:HGNC Symbol;Acc:HGNC:21367]
115861	NXNL1	nucleoredoxin like 1 [Source:HGNC Symbol;Acc:HGNC:25179]
118430	MUCL1	mucin like 1 [Source:HGNC Symbol;Acc:HGNC:30588]
121274	ZNF641	zinc finger protein 641 [Source:HGNC Symbol;Acc:HGNC:31834]
126147	NTN5	netrin 5 [Source:HGNC Symbol;Acc:HGNC:25208]
126668	TDRD10	tudor domain containing 10 [Source:HGNC Symbol;Acc:HGNC:25316]
126969	SLC44A3	solute carrier family 44 member 3 [Source:HGNC Symbol;Acc:HGNC:28689]
127002	ATXN7L2	ataxin 7 like 2 [Source:HGNC Symbol;Acc:HGNC:28713]
127391	TMCO2	transmembrane and coiled-coil domains 2 [Source:HGNC Symbol;Acc:HGNC:23312]
127540	HMGB4	high mobility group box 4 [Source:HGNC Symbol;Acc:HGNC:24954]
127703	C1orf216	chromosome 1 open reading frame 216 [Source:HGNC Symbol;Acc:HGNC:26800]
128209	KLF17	Kruppel like factor 17 [Source:HGNC Symbol;Acc:HGNC:18830]
128344	PIFO	primary cilia formation [Source:HGNC Symbol;Acc:HGNC:27009]
128346	C1orf162	chromosome 1 open reading frame 162 [Source:HGNC Symbol;Acc:HGNC:28344]
1297	COL9A1	collagen type IX alpha 1 chain [Source:HGNC Symbol;Acc:HGNC:2217]
130132	RFTN2	raftlin family member 2 [Source:HGNC Symbol;Acc:HGNC:26402]
1310	COL19A1	collagen type XIX alpha 1 chain [Source:HGNC Symbol;Acc:HGNC:2196]
131076	CCDC58	coiled-coil domain containing 58 [Source:HGNC Symbol;Acc:HGNC:31136]
131474	CHCHD4	coiled-coil-helix-coiled-coil-helix domain containing 4 [Source:HGNC Symbol;Acc:HGNC:26467]
1317	SLC31A1	solute carrier family 31 member 1 [Source:HGNC Symbol;Acc:HGNC:11016]
132203	SNTN	sentan, cilia apical structure protein [Source:HGNC Symbol;Acc:HGNC:33706]
132946	ARL 9.00	ADP ribosylation factor like GTPase 9 [Source:HGNC Symbol;Acc:HGNC:23592]
132954	PDCL2	phosducin like 2 [Source:HGNC Symbol;Acc:HGNC:29524]
1368	CPM	carboxypeptidase M [Source:HGNC Symbol;Acc:HGNC:2311]
1401	CRP	C-reactive protein [Source:HGNC Symbol;Acc:HGNC:2367]
140683	BPIFA2	BPI fold containing family A member 2 [Source:HGNC Symbol;Acc:HGNC:16203]
143425	SYT9	synaptotagmin 9 [Source:HGNC Symbol;Acc:HGNC:19265]
1446	CSN1S1	casein alpha s1 [Source:HGNC Symbol;Acc:HGNC:2445]
146861	SLC35G3	solute carrier family 35 member G3 [Source:HGNC Symbol;Acc:HGNC:26848]
146862	UNC45B	unc-45 myosin chaperone B [Source:HGNC Symbol;Acc:HGNC:14304]
148418	SAMD13	sterile alpha motif domain containing 13 [Source:HGNC Symbol;Acc:HGNC:24582]
148741	ANKRD35	ankyrin repeat domain 35 [Source:HGNC Symbol;Acc:HGNC:26323]
149076	ZNF362	zinc finger protein 362 [Source:HGNC Symbol;Acc:HGNC:18079]
150771	ITPRIPL1	ITPRIP like 1 [Source:HGNC Symbol;Acc:HGNC:29371]
152926	PPM1K	protein phosphatase, Mg2+/Mn2+ dependent 1K [Source:HGNC Symbol;Acc:HGNC:25415]
153241	CEP120	centrosomal protein 120 [Source:HGNC Symbol;Acc:HGNC:26690]
153562	MARVELD2	MARVEL domain containing 2 [Source:HGNC Symbol;Acc:HGNC:26401]
154313	CFAP206	cilia and flagella associated protein 206 [Source:HGNC Symbol;Acc:HGNC:21405]
1600	DAB1	DAB adaptor protein 1 [Source:HGNC Symbol;Acc:HGNC:2661]
163351	GBP6	guanylate binding protein family member 6 [Source:HGNC Symbol;Acc:HGNC:25395]
163782	KANK4	KN motif and ankyrin repeat domains 4 [Source:HGNC Symbol;Acc:HGNC:27263]
165721	DNAJB8	DnaJ heat shock protein family (Hsp40) member B8 [Source:HGNC Symbol;Acc:HGNC:23699]
1662	DDX10	DEAD-box helicase 10 [Source:HGNC Symbol;Acc:HGNC:2735]
167127	UGT3A2	UDP glycosyltransferase family 3 member A2 [Source:HGNC Symbol;Acc:HGNC:27266]
167465	ZNF366	zinc finger protein 366 [Source:HGNC Symbol;Acc:HGNC:18316]
1758	DMP1	dentin matrix acidic phosphoprotein 1 [Source:HGNC Symbol;Acc:HGNC:2932]
1820	ARID3A	AT-rich interaction domain 3A [Source:HGNC Symbol;Acc:HGNC:3031]
1893	ECM1	extracellular matrix protein 1 [Source:HGNC Symbol;Acc:HGNC:3153]
192670	AGO4	argonaute RISC component 4 [Source:HGNC Symbol;Acc:HGNC:18424]
196374	KRT78	keratin 78 [Source:HGNC Symbol;Acc:HGNC:28926]
1994	ELAVL1	ELAV like RNA binding protein 1 [Source:HGNC Symbol;Acc:HGNC:3312]
1996	ELAVL4	ELAV like RNA binding protein 4 [Source:HGNC Symbol;Acc:HGNC:3315]
199731	CADM4	cell adhesion molecule 4 [Source:HGNC Symbol;Acc:HGNC:30825]
199964	TMEM61	transmembrane protein 61 [Source:HGNC Symbol;Acc:HGNC:27296]
200008	CDCP2	CUB domain containing protein 2 [Source:HGNC Symbol;Acc:HGNC:27297]
200373	CFAP221	cilia and flagella associated protein 221 [Source:HGNC Symbol;Acc:HGNC:33720]
200403	VWA3B	von Willebrand factor A domain containing 3B [Source:HGNC Symbol;Acc:HGNC:28385]
2006	ELN	elastin [Source:HGNC Symbol;Acc:HGNC:3327]
200845	KCTD6	potassium channel tetramerization domain containing 6 [Source:HGNC Symbol;Acc:HGNC:22235]
201965	RWDD4	RWD domain containing 4 [Source:HGNC Symbol;Acc:HGNC:23750]
203111	ERICH5	glutamate rich 5 [Source:HGNC Symbol;Acc:HGNC:26823]
2166	FAAH	fatty acid amide hydrolase [Source:HGNC Symbol;Acc:HGNC:3553]
219402	MTIF3	mitochondrial translational initiation factor 3 [Source:HGNC Symbol;Acc:HGNC:29788]
219970	GLYATL2	glycine-N-acyltransferase like 2 [Source:HGNC Symbol;Acc:HGNC:24178]
22875	ENPP4	ectonucleotide pyrophosphatase/phosphodiesterase 4 [Source:HGNC Symbol;Acc:HGNC:3359]
23164	MPRIP	myosin phosphatase Rho interacting protein [Source:HGNC Symbol;Acc:HGNC:30321]
23179	RGL1	ral guanine nucleotide dissociation stimulator like 1 [Source:HGNC Symbol;Acc:HGNC:30281]
23223	RRP12	ribosomal RNA processing 12 homolog [Source:HGNC Symbol;Acc:HGNC:29100]
23306	NEMP1	nuclear envelope integral membrane protein 1 [Source:HGNC Symbol;Acc:HGNC:29001]
23428	SLC7A8	solute carrier family 7 member 8 [Source:HGNC Symbol;Acc:HGNC:11066]
23481	PES 1.00	pescadillo ribosomal biogenesis factor 1 [Source:HGNC Symbol;Acc:HGNC:8848]
23507	LRRC8B	leucine rich repeat containing 8 VRAC subunit B [Source:HGNC Symbol;Acc:HGNC:30692]
23770	FKBP8	FKBP prolyl isomerase 8 [Source:HGNC Symbol;Acc:HGNC:3724]
252995	FNDC5	fibronectin type III domain containing 5 [Source:HGNC Symbol;Acc:HGNC:20240]
254013	ETFBKMT	electron transfer flavoprotein subunit beta lysine methyltransferase [Source:HGNC Symbol;Acc:HGNC:28739]
254042	METAP1D	methionyl aminopeptidase type 1D, mitochondrial [Source:HGNC Symbol;Acc:HGNC:32583]
255119	CFAP299	cilia and flagella associated protein 299 [Source:HGNC Symbol;Acc:HGNC:28554]
256380	SCML4	Scm polycomb group protein like 4 [Source:HGNC Symbol;Acc:HGNC:21397]
258	AMBN	ameloblastin [Source:HGNC Symbol;Acc:HGNC:452]
25843	MOB4	MOB family member 4, phocein [Source:HGNC Symbol;Acc:HGNC:17261]
25983	NGDN	neuroguidin [Source:HGNC Symbol;Acc:HGNC:20271]
25984	KRT23	keratin 23 [Source:HGNC Symbol;Acc:HGNC:6438]
26024	PTCD1	pentatricopeptide repeat domain 1 [Source:HGNC Symbol;Acc:HGNC:22198]
260436	FDCSP	follicular dendritic cell secreted protein [Source:HGNC Symbol;Acc:HGNC:19215]
26156	RSL1D1	ribosomal L1 domain containing 1 [Source:HGNC Symbol;Acc:HGNC:24534]
26235	FBXL4	F-box and leucine rich repeat protein 4 [Source:HGNC Symbol;Acc:HGNC:13601]
26520	TIMM9	translocase of inner mitochondrial membrane 9 [Source:HGNC Symbol;Acc:HGNC:11819]
26574	AATF	apoptosis antagonizing transcription factor [Source:HGNC Symbol;Acc:HGNC:19235]
2672	GFI1	growth factor independent 1 transcriptional repressor [Source:HGNC Symbol;Acc:HGNC:4237]
26974	ZNF285	zinc finger protein 285 [Source:HGNC Symbol;Acc:HGNC:13079]
26995	TRUB2	TruB pseudouridine synthase family member 2 [Source:HGNC Symbol;Acc:HGNC:17170]
27086	FOXP1	forkhead box P1 [Source:HGNC Symbol;Acc:HGNC:3823]
27095	TRAPPC3	trafficking protein particle complex 3 [Source:HGNC Symbol;Acc:HGNC:19942]
27120	DKKL1	dickkopf like acrosomal protein 1 [Source:HGNC Symbol;Acc:HGNC:16528]
27154	BRPF3	bromodomain and PHD finger containing 3 [Source:HGNC Symbol;Acc:HGNC:14256]
27178	IL37	interleukin 37 [Source:HGNC Symbol;Acc:HGNC:15563]
27287	VENTX	VENT homeobox [Source:HGNC Symbol;Acc:HGNC:13639]
283248	RCOR2	REST corepressor 2 [Source:HGNC Symbol;Acc:HGNC:27455]
283471	TMPRSS12	transmembrane serine protease 12 [Source:HGNC Symbol;Acc:HGNC:28779]
284370	ZNF615	zinc finger protein 615 [Source:HGNC Symbol;Acc:HGNC:24740]
284443	ZNF493	zinc finger protein 493 [Source:HGNC Symbol;Acc:HGNC:23708]
284612	SYPL2	synaptophysin like 2 [Source:HGNC Symbol;Acc:HGNC:27638]
284680	SPATA46	spermatogenesis associated 46 [Source:HGNC Symbol;Acc:HGNC:27648]
285671	RNF180	ring finger protein 180 [Source:HGNC Symbol;Acc:HGNC:27752]
28958	COA3	cytochrome c oxidase assembly factor 3 [Source:HGNC Symbol;Acc:HGNC:24990]
28983	TMPRSS11E	transmembrane serine protease 11E [Source:HGNC Symbol;Acc:HGNC:24465]
29079	MED4	mediator complex subunit 4 [Source:HGNC Symbol;Acc:HGNC:17903]
29088	MRPL15	mitochondrial ribosomal protein L15 [Source:HGNC Symbol;Acc:HGNC:14054]
29903	CCDC106	coiled-coil domain containing 106 [Source:HGNC Symbol;Acc:HGNC:30181]
317703	VN1R4	vomeronasal 1 receptor 4 [Source:HGNC Symbol;Acc:HGNC:19871]
319	APOF	apolipoprotein F [Source:HGNC Symbol;Acc:HGNC:615]
3228	HOXC12	homeobox C12 [Source:HGNC Symbol;Acc:HGNC:5124]
3321	IGSF3	immunoglobulin superfamily member 3 [Source:HGNC Symbol;Acc:HGNC:5950]
338599	DUSP29	dual specificity phosphatase 29 [Source:HGNC Symbol;Acc:HGNC:23481]
338773	TMEM119	transmembrane protein 119 [Source:HGNC Symbol;Acc:HGNC:27884]
338785	KRT79	keratin 79 [Source:HGNC Symbol;Acc:HGNC:28930]
339327	ZNF546	zinc finger protein 546 [Source:HGNC Symbol;Acc:HGNC:28671]
3396	MRPL58	mitochondrial ribosomal protein L58 [Source:HGNC Symbol;Acc:HGNC:5359]
339906	PRSS42P	serine protease 42, pseudogene [Source:HGNC Symbol;Acc:HGNC:30716]
341567	H1-7	H1.7 linker histone [Source:HGNC Symbol;Acc:HGNC:24893]
342898	SYCN	syncollin [Source:HGNC Symbol;Acc:HGNC:18442]
344658	SAMD7	sterile alpha motif domain containing 7 [Source:HGNC Symbol;Acc:HGNC:25394]
347517	RAB41	RAB41, member RAS oncogene family [Source:HGNC Symbol;Acc:HGNC:18293]
353132	LCE1B	late cornified envelope 1B [Source:HGNC Symbol;Acc:HGNC:16611]
353139	LCE2A	late cornified envelope 2A [Source:HGNC Symbol;Acc:HGNC:29469]
353189	SLCO4C1	solute carrier organic anion transporter family member 4C1 [Source:HGNC Symbol;Acc:HGNC:23612]
3744	KCNA10	potassium voltage-gated channel subfamily A member 10 [Source:HGNC Symbol;Acc:HGNC:6219]
374407	DNAJB13	DnaJ heat shock protein family (Hsp40) member B13 [Source:HGNC Symbol;Acc:HGNC:30718]
374786	EFCAB5	EF-hand calcium binding domain 5 [Source:HGNC Symbol;Acc:HGNC:24801]
3766	KCNJ10	potassium inwardly rectifying channel subfamily J member 10 [Source:HGNC Symbol;Acc:HGNC:6256]
3848	KRT1	keratin 1 [Source:HGNC Symbol;Acc:HGNC:6412]
3860	KRT13	keratin 13 [Source:HGNC Symbol;Acc:HGNC:6415]
3868	KRT16	keratin 16 [Source:HGNC Symbol;Acc:HGNC:6423]
387338	NSUN4	NOP2/Sun RNA methyltransferase 4 [Source:HGNC Symbol;Acc:HGNC:31802]
387601	SLC22A25	solute carrier family 22 member 25 [Source:HGNC Symbol;Acc:HGNC:32935]
388512	CLEC17A	C-type lectin domain containing 17A [Source:HGNC Symbol;Acc:HGNC:34520]
388536	ZNF790	zinc finger protein 790 [Source:HGNC Symbol;Acc:HGNC:33114]
388646	GBP7	guanylate binding protein 7 [Source:HGNC Symbol;Acc:HGNC:29606]
388962	BOLA3	bolA family member 3 [Source:HGNC Symbol;Acc:HGNC:24415]
389	RHOC	ras homolog family member C [Source:HGNC Symbol;Acc:HGNC:669]
390928	ACP7	acid phosphatase 7, tartrate resistant (putative) [Source:HGNC Symbol;Acc:HGNC:33781]
391253	SPINT4	serine peptidase inhibitor, Kunitz type 4 [Source:HGNC Symbol;Acc:HGNC:16130]
400950	C2orf91	chromosome 2 putative open reading frame 91 [Source:HGNC Symbol;Acc:HGNC:42966]
401027	C2orf66	chromosome 2 open reading frame 66 [Source:HGNC Symbol;Acc:HGNC:33809]
401137	PRR27	proline rich 27 [Source:HGNC Symbol;Acc:HGNC:33193]
401190	RGS7BP	regulator of G protein signaling 7 binding protein [Source:HGNC Symbol;Acc:HGNC:23271]
401944	LDLRAD2	low density lipoprotein receptor class A domain containing 2 [Source:HGNC Symbol;Acc:HGNC:32071]
402	ARL 2.00	ADP ribosylation factor like GTPase 2 [Source:HGNC Symbol;Acc:HGNC:693]
431705	ASTL	astacin like metalloendopeptidase [Source:HGNC Symbol;Acc:HGNC:31704]
4345	CD200	CD200 molecule [Source:HGNC Symbol;Acc:HGNC:7203]
440533	PSG8	pregnancy specific beta-1-glycoprotein 8 [Source:HGNC Symbol;Acc:HGNC:9525]
441161	OOEP	oocyte expressed protein [Source:HGNC Symbol;Acc:HGNC:21382]
442247	RFPL4B	ret finger protein like 4B [Source:HGNC Symbol;Acc:HGNC:33264]
4898	NRDC	nardilysin convertase [Source:HGNC Symbol;Acc:HGNC:7995]
493901	RNASE12	ribonuclease A family member 12 (inactive) [Source:HGNC Symbol;Acc:HGNC:24211]
4951	OCM2	oncomodulin 2 [Source:HGNC Symbol;Acc:HGNC:34396]
50651	SLC45A1	solute carrier family 45 member 1 [Source:HGNC Symbol;Acc:HGNC:17939]
51002	TPRKB	TP53RK binding protein [Source:HGNC Symbol;Acc:HGNC:24259]
51023	MRPS18C	mitochondrial ribosomal protein S18C [Source:HGNC Symbol;Acc:HGNC:16633]
51024	FIS1	fission, mitochondrial 1 [Source:HGNC Symbol;Acc:HGNC:21689]
51069	MRPL2	mitochondrial ribosomal protein L2 [Source:HGNC Symbol;Acc:HGNC:14056]
51106	TFB1M	transcription factor B1, mitochondrial [Source:HGNC Symbol;Acc:HGNC:17037]
51146	A4GNT	alpha-1,4-N-acetylglucosaminyltransferase [Source:HGNC Symbol;Acc:HGNC:17968]
51161	C3orf18	chromosome 3 open reading frame 18 [Source:HGNC Symbol;Acc:HGNC:24837]
51263	MRPL30	mitochondrial ribosomal protein L30 [Source:HGNC Symbol;Acc:HGNC:14036]
51310	SLC22A17	solute carrier family 22 member 17 [Source:HGNC Symbol;Acc:HGNC:23095]
51316	PLAC8	placenta associated 8 [Source:HGNC Symbol;Acc:HGNC:19254]
51361	HOOK1	hook microtubule tethering protein 1 [Source:HGNC Symbol;Acc:HGNC:19884]
51373	MRPS17	mitochondrial ribosomal protein S17 [Source:HGNC Symbol;Acc:HGNC:14047]
51490	SPOUT1	SPOUT domain containing methyltransferase 1 [Source:HGNC Symbol;Acc:HGNC:26933]
51501	HIKESHI	heat shock protein nuclear import factor hikeshi [Source:HGNC Symbol;Acc:HGNC:26938]
51506	UFC1	ubiquitin-fold modifier conjugating enzyme 1 [Source:HGNC Symbol;Acc:HGNC:26941]
51507	RTF2	replication termination factor 2 [Source:HGNC Symbol;Acc:HGNC:15890]
51538	ZCCHC17	zinc finger CCHC-type containing 17 [Source:HGNC Symbol;Acc:HGNC:30246]
51605	TRMT6	tRNA methyltransferase 6 [Source:HGNC Symbol;Acc:HGNC:20900]
51650	MRPS33	mitochondrial ribosomal protein S33 [Source:HGNC Symbol;Acc:HGNC:16634]
51686	OAZ3	ornithine decarboxylase antizyme 3 [Source:HGNC Symbol;Acc:HGNC:8097]
51754	TMEM8B	transmembrane protein 8B [Source:HGNC Symbol;Acc:HGNC:21427]
51778	MYOZ2	myozenin 2 [Source:HGNC Symbol;Acc:HGNC:1330]
51805	COQ3	coenzyme Q3, methyltransferase [Source:HGNC Symbol;Acc:HGNC:18175]
5188	GATB	glutamyl-tRNA amidotransferase subunit B [Source:HGNC Symbol;Acc:HGNC:8849]
54520	CCDC93	coiled-coil domain containing 93 [Source:HGNC Symbol;Acc:HGNC:25611]
54680	ZNHIT6	zinc finger HIT-type containing 6 [Source:HGNC Symbol;Acc:HGNC:26089]
54809	SAMD9	sterile alpha motif domain containing 9 [Source:HGNC Symbol;Acc:HGNC:1348]
54853	WDR55	WD repeat domain 55 [Source:HGNC Symbol;Acc:HGNC:25971]
54900	LAX1	lymphocyte transmembrane adaptor 1 [Source:HGNC Symbol;Acc:HGNC:26005]
54931	TRMT10C	tRNA methyltransferase 10C, mitochondrial RNase P subunit [Source:HGNC Symbol;Acc:HGNC:26022]
55052	MRPL20	mitochondrial ribosomal protein L20 [Source:HGNC Symbol;Acc:HGNC:14478]
55108	BSDC1	BSD domain containing 1 [Source:HGNC Symbol;Acc:HGNC:25501]
55153	SDAD1	SDA1 domain containing 1 [Source:HGNC Symbol;Acc:HGNC:25537]
55196	RESF1	retroelement silencing factor 1 [Source:HGNC Symbol;Acc:HGNC:25559]
55226	NAT10	N-acetyltransferase 10 [Source:HGNC Symbol;Acc:HGNC:29830]
55250	ELP2	elongator acetyltransferase complex subunit 2 [Source:HGNC Symbol;Acc:HGNC:18248]
55258	THNSL2	threonine synthase like 2 [Source:HGNC Symbol;Acc:HGNC:25602]
55283	MCOLN3	mucolipin 3 [Source:HGNC Symbol;Acc:HGNC:13358]
55319	TMA16	translation machinery associated 16 homolog [Source:HGNC Symbol;Acc:HGNC:25638]
55339	WDR33	WD repeat domain 33 [Source:HGNC Symbol;Acc:HGNC:25651]
55356	SLC22A15	solute carrier family 22 member 15 [Source:HGNC Symbol;Acc:HGNC:20301]
5549	PRELP	proline and arginine rich end leucine rich repeat protein [Source:HGNC Symbol;Acc:HGNC:9357]
55510	DDX43	DEAD-box helicase 43 [Source:HGNC Symbol;Acc:HGNC:18677]
55573	CDV3	CDV3 homolog [Source:HGNC Symbol;Acc:HGNC:26928]
55759	WDR12	WD repeat domain 12 [Source:HGNC Symbol;Acc:HGNC:14098]
55763	EXOC1	exocyst complex component 1 [Source:HGNC Symbol;Acc:HGNC:30380]
55813	UTP6	UTP6 small subunit processome component [Source:HGNC Symbol;Acc:HGNC:18279]
55835	CENPJ	centromere protein J [Source:HGNC Symbol;Acc:HGNC:17272]
55839	CENPN	centromere protein N [Source:HGNC Symbol;Acc:HGNC:30873]
55867	SLC22A11	solute carrier family 22 member 11 [Source:HGNC Symbol;Acc:HGNC:18120]
55924	INKA2	inka box actin regulator 2 [Source:HGNC Symbol;Acc:HGNC:28045]
56342	PPAN	peter pan homolog [Source:HGNC Symbol;Acc:HGNC:9227]
56673	C11orf16	chromosome 11 open reading frame 16 [Source:HGNC Symbol;Acc:HGNC:1169]
56934	CA10	carbonic anhydrase 10 [Source:HGNC Symbol;Acc:HGNC:1369]
57128	LYRM4	LYR motif containing 4 [Source:HGNC Symbol;Acc:HGNC:21365]
574414	PRR9	proline rich 9 [Source:HGNC Symbol;Acc:HGNC:32057]
57468	SLC12A5	solute carrier family 12 member 5 [Source:HGNC Symbol;Acc:HGNC:13818]
57622	LRFN1	leucine rich repeat and fibronectin type III domain containing 1 [Source:HGNC Symbol;Acc:HGNC:29290]
578	BAK1	BCL2 antagonist/killer 1 [Source:HGNC Symbol;Acc:HGNC:949]
58503	OPRPN	opiorphin prepropeptide [Source:HGNC Symbol;Acc:HGNC:17279]
5919	RARRES2	retinoic acid receptor responder 2 [Source:HGNC Symbol;Acc:HGNC:9868]
5920	PLAAT4	phospholipase A and acyltransferase 4 [Source:HGNC Symbol;Acc:HGNC:9869]
59269	HIVEP3	HIVEP zinc finger 3 [Source:HGNC Symbol;Acc:HGNC:13561]
60313	GPBP1L1	GC-rich promoter binding protein 1 like 1 [Source:HGNC Symbol;Acc:HGNC:28843]
6059	ABCE1	ATP binding cassette subfamily E member 1 [Source:HGNC Symbol;Acc:HGNC:69]
60684	TRAPPC11	trafficking protein particle complex 11 [Source:HGNC Symbol;Acc:HGNC:25751]
6150	MRPL23	mitochondrial ribosomal protein L23 [Source:HGNC Symbol;Acc:HGNC:10322]
6328	SCN3A	sodium voltage-gated channel alpha subunit 3 [Source:HGNC Symbol;Acc:HGNC:10590]
6336	SCN10A	sodium voltage-gated channel alpha subunit 10 [Source:HGNC Symbol;Acc:HGNC:10582]
64232	MS4A5	membrane spanning 4-domains A5 [Source:HGNC Symbol;Acc:HGNC:13374]
643246	MAP1LC3B2	microtubule associated protein 1 light chain 3 beta 2 [Source:HGNC Symbol;Acc:HGNC:34390]
643664	SLC35G6	solute carrier family 35 member G6 [Source:HGNC Symbol;Acc:HGNC:31351]
64375	IKZF4	IKAROS family zinc finger 4 [Source:HGNC Symbol;Acc:HGNC:13179]
646498	C3orf84	chromosome 3 open reading frame 84 [Source:HGNC Symbol;Acc:HGNC:44666]
64853	AIDA	axin interactor, dorsalization associated [Source:HGNC Symbol;Acc:HGNC:25761]
6490	PMEL	premelanosome protein [Source:HGNC Symbol;Acc:HGNC:10880]
64983	MRPL32	mitochondrial ribosomal protein L32 [Source:HGNC Symbol;Acc:HGNC:14035]
6532	SLC6A4	solute carrier family 6 member 4 [Source:HGNC Symbol;Acc:HGNC:11050]
654231	OCM	oncomodulin [Source:HGNC Symbol;Acc:HGNC:8105]
6640	SNTA1	syntrophin alpha 1 [Source:HGNC Symbol;Acc:HGNC:11167]
6779	STATH	statherin [Source:HGNC Symbol;Acc:HGNC:11369]
6860	SYT4	synaptotagmin 4 [Source:HGNC Symbol;Acc:HGNC:11512]
689	BTF3	basic transcription factor 3 [Source:HGNC Symbol;Acc:HGNC:1125]
6920	TCEA3	transcription elongation factor A3 [Source:HGNC Symbol;Acc:HGNC:11615]
692094	MSMP	microseminoprotein, prostate associated [Source:HGNC Symbol;Acc:HGNC:29663]
705	BYSL	bystin like [Source:HGNC Symbol;Acc:HGNC:1157]
7150	TOP 1.00	DNA topoisomerase I [Source:HGNC Symbol;Acc:HGNC:11986]
7270	TTF1	transcription termination factor 1 [Source:HGNC Symbol;Acc:HGNC:12397]
7343	UBTF	upstream binding transcription factor [Source:HGNC Symbol;Acc:HGNC:12511]
7776	ZNF236	zinc finger protein 236 [Source:HGNC Symbol;Acc:HGNC:13028]
7818	DAP3	death associated protein 3 [Source:HGNC Symbol;Acc:HGNC:2673]
79003	MIS12	MIS12 kinetochore complex component [Source:HGNC Symbol;Acc:HGNC:24967]
79031	PDCL3	phosducin like 3 [Source:HGNC Symbol;Acc:HGNC:28860]
79039	DDX54	DEAD-box helicase 54 [Source:HGNC Symbol;Acc:HGNC:20084]
79078	C1orf50	chromosome 1 open reading frame 50 [Source:HGNC Symbol;Acc:HGNC:28795]
79366	HMGN5	high mobility group nucleosome binding domain 5 [Source:HGNC Symbol;Acc:HGNC:8013]
79574	EPS8L3	EPS8 like 3 [Source:HGNC Symbol;Acc:HGNC:21297]
79645	EFCAB1	EF-hand calcium binding domain 1 [Source:HGNC Symbol;Acc:HGNC:25678]
79677	SMC6	structural maintenance of chromosomes 6 [Source:HGNC Symbol;Acc:HGNC:20466]
79913	ACTR5	actin related protein 5 [Source:HGNC Symbol;Acc:HGNC:14671]
79915	ATAD5	ATPase family AAA domain containing 5 [Source:HGNC Symbol;Acc:HGNC:25752]
79932	KIAA0319L	KIAA0319 like [Source:HGNC Symbol;Acc:HGNC:30071]
80739	MPIG6B	megakaryocyte and platelet inhibitory receptor G6b [Source:HGNC Symbol;Acc:HGNC:13937]
80759	KHDC1	KH domain containing 1 [Source:HGNC Symbol;Acc:HGNC:21366]
81572	PDRG1	p53 and DNA damage regulated 1 [Source:HGNC Symbol;Acc:HGNC:16119]
820	CAMP	cathelicidin antimicrobial peptide [Source:HGNC Symbol;Acc:HGNC:1472]
829	CAPZA1	capping actin protein of muscle Z-line subunit alpha 1 [Source:HGNC Symbol;Acc:HGNC:1488]
83417	FCRL4	Fc receptor like 4 [Source:HGNC Symbol;Acc:HGNC:18507]
83636	C19orf12	chromosome 19 open reading frame 12 [Source:HGNC Symbol;Acc:HGNC:25443]
83698	CALN1	calneuron 1 [Source:HGNC Symbol;Acc:HGNC:13248]
83752	LONP2	lon peptidase 2, peroxisomal [Source:HGNC Symbol;Acc:HGNC:20598]
83857	TMTC1	transmembrane O-mannosyltransferase targeting cadherins 1 [Source:HGNC Symbol;Acc:HGNC:24099]
83884	SLC25A2	solute carrier family 25 member 2 [Source:HGNC Symbol;Acc:HGNC:22921]
84103	C4orf17	chromosome 4 open reading frame 17 [Source:HGNC Symbol;Acc:HGNC:25274]
84135	UTP15	UTP15 small subunit processome component [Source:HGNC Symbol;Acc:HGNC:25758]
84154	RPF2	ribosome production factor 2 homolog [Source:HGNC Symbol;Acc:HGNC:20870]
84196	USP48	ubiquitin specific peptidase 48 [Source:HGNC Symbol;Acc:HGNC:18533]
84217	ZMYND12	zinc finger MYND-type containing 12 [Source:HGNC Symbol;Acc:HGNC:21192]
84251	SGIP1	SH3GL interacting endocytic adaptor 1 [Source:HGNC Symbol;Acc:HGNC:25412]
84285	EIF1AD	eukaryotic translation initiation factor 1A domain containing [Source:HGNC Symbol;Acc:HGNC:28147]
84311	MRPL45	mitochondrial ribosomal protein L45 [Source:HGNC Symbol;Acc:HGNC:16651]
84340	GFM2	GTP dependent ribosome recycling factor mitochondrial 2 [Source:HGNC Symbol;Acc:HGNC:29682]
84527	ZNF559	zinc finger protein 559 [Source:HGNC Symbol;Acc:HGNC:28197]
84549	MAK16	MAK16 homolog [Source:HGNC Symbol;Acc:HGNC:13703]
84694	GJA10	gap junction protein alpha 10 [Source:HGNC Symbol;Acc:HGNC:16995]
84708	LNX1	ligand of numb-protein X 1 [Source:HGNC Symbol;Acc:HGNC:6657]
84765	ZNF577	zinc finger protein 577 [Source:HGNC Symbol;Acc:HGNC:28673]
84816	RTN4IP1	reticulon 4 interacting protein 1 [Source:HGNC Symbol;Acc:HGNC:18647]
84879	MFSD2A	major facilitator superfamily domain containing 2A [Source:HGNC Symbol;Acc:HGNC:25897]
84905	ZNF341	zinc finger protein 341 [Source:HGNC Symbol;Acc:HGNC:15992]
84967	LSM 10.00	LSM10, U7 small nuclear RNA associated [Source:HGNC Symbol;Acc:HGNC:17562]
84987	COX14	cytochrome c oxidase assembly factor COX14 [Source:HGNC Symbol;Acc:HGNC:28216]
85476	GFM1	G elongation factor mitochondrial 1 [Source:HGNC Symbol;Acc:HGNC:13780]
85865	GTPBP10	GTP binding protein 10 [Source:HGNC Symbol;Acc:HGNC:25106]
8668	EIF3I	eukaryotic translation initiation factor 3 subunit I [Source:HGNC Symbol;Acc:HGNC:3272]
8685	MARCO	macrophage receptor with collagenous structure [Source:HGNC Symbol;Acc:HGNC:6895]
8892	EIF2B2	eukaryotic translation initiation factor 2B subunit beta [Source:HGNC Symbol;Acc:HGNC:3258]
9048	ARTN	artemin [Source:HGNC Symbol;Acc:HGNC:727]
90522	YIF1B	Yip1 interacting factor homolog B, membrane trafficking protein [Source:HGNC Symbol;Acc:HGNC:30511]
9066	SYT7	synaptotagmin 7 [Source:HGNC Symbol;Acc:HGNC:11514]
9077	DIRAS3	DIRAS family GTPase 3 [Source:HGNC Symbol;Acc:HGNC:687]
91687	CENPL	centromere protein L [Source:HGNC Symbol;Acc:HGNC:17879]
91750	LIN52	lin-52 DREAM MuvB core complex component [Source:HGNC Symbol;Acc:HGNC:19856]
9212	AURKB	aurora kinase B [Source:HGNC Symbol;Acc:HGNC:11390]
922	CD5L	CD5 molecule like [Source:HGNC Symbol;Acc:HGNC:1690]
92259	MRPS36	mitochondrial ribosomal protein S36 [Source:HGNC Symbol;Acc:HGNC:16631]
92856	IMP4	IMP U3 small nucleolar ribonucleoprotein 4 [Source:HGNC Symbol;Acc:HGNC:30856]
932	MS4A3	membrane spanning 4-domains A3 [Source:HGNC Symbol;Acc:HGNC:7317]
93487	MAPK1IP1L	mitogen-activated protein kinase 1 interacting protein 1 like [Source:HGNC Symbol;Acc:HGNC:19840]
9398	CD101	CD101 molecule [Source:HGNC Symbol;Acc:HGNC:5949]
9412	MED21	mediator complex subunit 21 [Source:HGNC Symbol;Acc:HGNC:11473]
94240	EPSTI1	epithelial stromal interaction 1 [Source:HGNC Symbol;Acc:HGNC:16465]
9442	MED27	mediator complex subunit 27 [Source:HGNC Symbol;Acc:HGNC:2377]
9477	MED20	mediator complex subunit 20 [Source:HGNC Symbol;Acc:HGNC:16840]
9498	SLC4A8	solute carrier family 4 member 8 [Source:HGNC Symbol;Acc:HGNC:11034]
9556	ATP5MPL	ATP synthase membrane subunit 6.8PL [Source:HGNC Symbol;Acc:HGNC:1188]
963	CD53	CD53 molecule [Source:HGNC Symbol;Acc:HGNC:1686]
9643	MORF4L2	mortality factor 4 like 2 [Source:HGNC Symbol;Acc:HGNC:16849]
9657	IQCB1	IQ motif containing B1 [Source:HGNC Symbol;Acc:HGNC:28949]
9673	SLC25A44	solute carrier family 25 member 44 [Source:HGNC Symbol;Acc:HGNC:29036]
9694	EMC2	ER membrane protein complex subunit 2 [Source:HGNC Symbol;Acc:HGNC:28963]
9783	RIMS3	regulating synaptic membrane exocytosis 3 [Source:HGNC Symbol;Acc:HGNC:21292]
9816	URB2	URB2 ribosome biogenesis homolog [Source:HGNC Symbol;Acc:HGNC:28967]
9874	TLK1	tousled like kinase 1 [Source:HGNC Symbol;Acc:HGNC:11841]

## Sheet: Figure 3C
Overlap Results
Collection(s):	C1
# overlaps shown:	8
# genesets in collections:	278
# genes in comparison (n):	508
# genes in universe (N):	40312
Gene Set Name	# Genes in Gene Set (K)	Description	# Genes in Overlap (k)	k/K	p-value	FDR q-value
chr17q25	297	Ensembl 103 genes in cytogenetic band chr17q25	59	0.1987	2.21e-52	6.15e-50
chr15q15	143	Ensembl 103 genes in cytogenetic band chr15q15	11	0.0769	2.21e-06	0.000308
chr8q24	321	Ensembl 103 genes in cytogenetic band chr8q24	16	0.0498	3.96e-06	0.000367
chr16p13	407	Ensembl 103 genes in cytogenetic band chr16p13	17	0.0418	2.01e-05	0.0014
chr5q35	222	Ensembl 103 genes in cytogenetic band chr5q35	11	0.0495	0.000133	0.00738
chr20q13	400	Ensembl 103 genes in cytogenetic band chr20q13	15	0.0375	0.000199	0.00922
chr17q12	143	Ensembl 103 genes in cytogenetic band chr17q12	8	0.0559	0.000485	0.0193
chr1q42	230	Ensembl 103 genes in cytogenetic band chr1q42	10	0.0435	0.000738	0.0257
Gene/Gene Set Overlap Matrix
Entrez Gene Id	Gene Symbol	Gene Description	chr17q25	chr15q15	chr8q24	chr16p13	chr5q35	chr20q13	chr17q12	chr1q42
10458	BAIAP2	BAR/IMD domain containing adaptor protein 2 [Source:HGNC Symbol;Acc:HGNC:947]	chr17q25
114804	RNF157	ring finger protein 157 [Source:HGNC Symbol;Acc:HGNC:29402]	chr17q25
116729	PPP1R27	protein phosphatase 1 regulatory subunit 27 [Source:HGNC Symbol;Acc:HGNC:16813]	chr17q25
124512	METTL23	methyltransferase like 23 [Source:HGNC Symbol;Acc:HGNC:26988]	chr17q25
124565	SLC38A10	solute carrier family 38 member 10 [Source:HGNC Symbol;Acc:HGNC:28237]	chr17q25
124590	USH1G	USH1 protein network component sans [Source:HGNC Symbol;Acc:HGNC:16356]	chr17q25
1468	SLC25A10	solute carrier family 25 member 10 [Source:HGNC Symbol;Acc:HGNC:10980]	chr17q25
15	AANAT	aralkylamine N-acetyltransferase [Source:HGNC Symbol;Acc:HGNC:19]	chr17q25
201254	CENPX	centromere protein X [Source:HGNC Symbol;Acc:HGNC:11422]	chr17q25
201255	LRRC45	leucine rich repeat containing 45 [Source:HGNC Symbol;Acc:HGNC:28302]	chr17q25
201292	TRIM65	tripartite motif containing 65 [Source:HGNC Symbol;Acc:HGNC:27316]	chr17q25
2125	EVPL	envoplakin [Source:HGNC Symbol;Acc:HGNC:3503]	chr17q25
22994	CEP131	centrosomal protein 131 [Source:HGNC Symbol;Acc:HGNC:29511]	chr17q25
23163	GGA3	golgi associated, gamma adaptin ear containing, ARF binding protein 3 [Source:HGNC Symbol;Acc:HGNC:17079]	chr17q25
23210	JMJD6	jumonji domain containing 6, arginine demethylase and lysine hydroxylase [Source:HGNC Symbol;Acc:HGNC:19355]	chr17q25
23558	WBP2	WW domain binding protein 2 [Source:HGNC Symbol;Acc:HGNC:12738]	chr17q25
256933	NPB	neuropeptide B [Source:HGNC Symbol;Acc:HGNC:30099]	chr17q25
25794	FSCN2	fascin actin-bundling protein 2, retinal [Source:HGNC Symbol;Acc:HGNC:3960]	chr17q25
2584	GALK1	galactokinase 1 [Source:HGNC Symbol;Acc:HGNC:4118]	chr17q25
283987	HID1	HID1 domain containing [Source:HGNC Symbol;Acc:HGNC:15736]	chr17q25
283999	TMEM235	transmembrane protein 235 [Source:HGNC Symbol;Acc:HGNC:27563]	chr17q25
284131	ENDOV	endonuclease V [Source:HGNC Symbol;Acc:HGNC:26640]	chr17q25
284184	NDUFAF8	NADH:ubiquinone oxidoreductase complex assembly factor 8 [Source:HGNC Symbol;Acc:HGNC:33551]	chr17q25
284207	METRNL	meteorin like, glial cell differentiation regulator [Source:HGNC Symbol;Acc:HGNC:27584]	chr17q25
3021	H3-3B	H3.3 histone B [Source:HGNC Symbol;Acc:HGNC:4765]	chr17q25
30833	NT5C	5', 3'-nucleotidase, cytosolic [Source:HGNC Symbol;Acc:HGNC:17144]	chr17q25
353174	ZACN	zinc activated ion channel [Source:HGNC Symbol;Acc:HGNC:29504]	chr17q25
388419	BTBD17	BTB domain containing 17 [Source:HGNC Symbol;Acc:HGNC:33758]	chr17q25
3959	LGALS3BP	galectin 3 binding protein [Source:HGNC Symbol;Acc:HGNC:6564]	chr17q25
396	ARHGDIA	Rho GDP dissociation inhibitor alpha [Source:HGNC Symbol;Acc:HGNC:678]	chr17q25
400629	TEX19	testis expressed 19 [Source:HGNC Symbol;Acc:HGNC:33802]	chr17q25
4097	MAFG	MAF bZIP transcription factor G [Source:HGNC Symbol;Acc:HGNC:6781]	chr17q25
5034	P4HB	prolyl 4-hydroxylase subunit beta [Source:HGNC Symbol;Acc:HGNC:8548]	chr17q25
51181	DCXR	dicarbonyl and L-xylulose reductase [Source:HGNC Symbol;Acc:HGNC:18985]	chr17q25
51547	SIRT7	sirtuin 7 [Source:HGNC Symbol;Acc:HGNC:14935]	chr17q25
55808	ST6GALNAC1	ST6 N-acetylgalactosaminide alpha-2,6-sialyltransferase 1 [Source:HGNC Symbol;Acc:HGNC:23614]	chr17q25
5635	PRPSAP1	phosphoribosyl pyrophosphate synthetase associated protein 1 [Source:HGNC Symbol;Acc:HGNC:9466]	chr17q25
57409	MIF4GD	MIF4G domain containing [Source:HGNC Symbol;Acc:HGNC:24030]	chr17q25
57513	CASKIN2	CASK interacting protein 2 [Source:HGNC Symbol;Acc:HGNC:18200]	chr17q25
5831	PYCR1	pyrroline-5-carboxylate reductase 1 [Source:HGNC Symbol;Acc:HGNC:9721]	chr17q25
5881	RAC3	Rac family small GTPase 3 [Source:HGNC Symbol;Acc:HGNC:9803]	chr17q25
63893	UBE2O	ubiquitin conjugating enzyme E2 O [Source:HGNC Symbol;Acc:HGNC:29554]	chr17q25
6398	SECTM1	secreted and transmembrane 1 [Source:HGNC Symbol;Acc:HGNC:10707]	chr17q25
64118	DUS1L	dihydrouridine synthase 1 like [Source:HGNC Symbol;Acc:HGNC:30086]	chr17q25
64122	FN3K	fructosamine 3 kinase [Source:HGNC Symbol;Acc:HGNC:24822]	chr17q25
7077	TIMP2	TIMP metallopeptidase inhibitor 2 [Source:HGNC Symbol;Acc:HGNC:11821]	chr17q25
7083	TK1	thymidine kinase 1 [Source:HGNC Symbol;Acc:HGNC:11830]	chr17q25
71	ACTG1	actin gamma 1 [Source:HGNC Symbol;Acc:HGNC:144]	chr17q25
79092	CARD14	caspase recruitment domain family member 14 [Source:HGNC Symbol;Acc:HGNC:16446]	chr17q25
79157	MFSD11	major facilitator superfamily domain containing 11 [Source:HGNC Symbol;Acc:HGNC:25458]	chr17q25
79637	ARMC7	armadillo repeat containing 7 [Source:HGNC Symbol;Acc:HGNC:26168]	chr17q25
79755	ZNF750	zinc finger protein 750 [Source:HGNC Symbol;Acc:HGNC:25843]	chr17q25
80233	FAAP100	FA core complex associated protein 100 [Source:HGNC Symbol;Acc:HGNC:26171]	chr17q25
84733	CBX2	chromobox 2 [Source:HGNC Symbol;Acc:HGNC:1552]	chr17q25
85302	FBF1	Fas binding factor 1 [Source:HGNC Symbol;Acc:HGNC:24674]	chr17q25
8877	SPHK1	sphingosine kinase 1 [Source:HGNC Symbol;Acc:HGNC:11240]	chr17q25
91107	TRIM47	tripartite motif containing 47 [Source:HGNC Symbol;Acc:HGNC:19020]	chr17q25
9123	SLC16A3	solute carrier family 16 member 3 [Source:HGNC Symbol;Acc:HGNC:10924]	chr17q25
9772	TMEM94	transmembrane protein 94 [Source:HGNC Symbol;Acc:HGNC:28983]	chr17q25
10169	SERF2	small EDRK-rich factor 2 [Source:HGNC Symbol;Acc:HGNC:10757]		chr15q15
23269	MGA	MAX dimerization protein MGA [Source:HGNC Symbol;Acc:HGNC:14010]		chr15q15
27079	RPUSD2	RNA pseudouridine synthase domain containing 2 [Source:HGNC Symbol;Acc:HGNC:24180]		chr15q15
283748	PLA2G4D	phospholipase A2 group IVD [Source:HGNC Symbol;Acc:HGNC:30038]		chr15q15
3706	ITPKA	inositol-trisphosphate 3-kinase A [Source:HGNC Symbol;Acc:HGNC:6178]		chr15q15
4236	MFAP1	microfibril associated protein 1 [Source:HGNC Symbol;Acc:HGNC:7032]		chr15q15
619189	SERINC4	serine incorporator 4 [Source:HGNC Symbol;Acc:HGNC:32237]		chr15q15
79968	WDR76	WD repeat domain 76 [Source:HGNC Symbol;Acc:HGNC:25773]		chr15q15
80237	ELL3	elongation factor for RNA polymerase II 3 [Source:HGNC Symbol;Acc:HGNC:23113]		chr15q15
9333	TGM5	transglutaminase 5 [Source:HGNC Symbol;Acc:HGNC:11781]		chr15q15
9836	LCMT2	leucine carboxyl methyltransferase 2 [Source:HGNC Symbol;Acc:HGNC:17558]		chr15q15
113655	MFSD3	major facilitator superfamily domain containing 3 [Source:HGNC Symbol;Acc:HGNC:25157]			chr8q24
157378	TMEM65	transmembrane protein 65 [Source:HGNC Symbol;Acc:HGNC:25203]			chr8q24
2738	GLI4	GLI family zinc finger 4 [Source:HGNC Symbol;Acc:HGNC:4320]			chr8q24
3297	HSF1	heat shock transcription factor 1 [Source:HGNC Symbol;Acc:HGNC:5224]			chr8q24
401474	SAMD12	sterile alpha motif domain containing 12 [Source:HGNC Symbol;Acc:HGNC:31750]			chr8q24
4061	LY6E	lymphocyte antigen 6 family member E [Source:HGNC Symbol;Acc:HGNC:6727]			chr8q24
414919	C8orf82	chromosome 8 open reading frame 82 [Source:HGNC Symbol;Acc:HGNC:33826]			chr8q24
50626	CYHR1	cysteine and histidine rich 1 [Source:HGNC Symbol;Acc:HGNC:17806]			chr8q24
5339	PLEC	plectin [Source:HGNC Symbol;Acc:HGNC:9069]			chr8q24
54108	CHRAC1	chromatin accessibility complex subunit 1 [Source:HGNC Symbol;Acc:HGNC:13544]			chr8q24
55039	TRMT12	tRNA methyltransferase 12 homolog [Source:HGNC Symbol;Acc:HGNC:26091]			chr8q24
58500	ZNF250	zinc finger protein 250 [Source:HGNC Symbol;Acc:HGNC:13044]			chr8q24
65265	C8orf33	chromosome 8 open reading frame 33 [Source:HGNC Symbol;Acc:HGNC:26104]			chr8q24
79792	GSDMD	gasdermin D [Source:HGNC Symbol;Acc:HGNC:25697]			chr8q24
8000	PSCA	prostate stem cell antigen [Source:HGNC Symbol;Acc:HGNC:9500]			chr8q24
81858	SHARPIN	SHANK associated RH domain interactor [Source:HGNC Symbol;Acc:HGNC:25321]			chr8q24
10273	STUB1	STIP1 homology and U-box containing protein 1 [Source:HGNC Symbol;Acc:HGNC:11427]				chr16p13
113000	RPUSD1	RNA pseudouridine synthase domain containing 1 [Source:HGNC Symbol;Acc:HGNC:14173]				chr16p13
23162	MAPK8IP3	mitogen-activated protein kinase 8 interacting protein 3 [Source:HGNC Symbol;Acc:HGNC:6884]				chr16p13
254528	MEIOB	meiosis specific with OB-fold [Source:HGNC Symbol;Acc:HGNC:28569]				chr16p13
25837	RAB26	RAB26, member RAS oncogene family [Source:HGNC Symbol;Acc:HGNC:14259]				chr16p13
28955	DEXI	Dexi homolog [Source:HGNC Symbol;Acc:HGNC:13267]				chr16p13
3050	HBZ	hemoglobin subunit zeta [Source:HGNC Symbol;Acc:HGNC:4835]				chr16p13
339123	JMJD8	jumonji domain containing 8 [Source:HGNC Symbol;Acc:HGNC:14148]				chr16p13
51734	MSRB1	methionine sulfoxide reductase B1 [Source:HGNC Symbol;Acc:HGNC:14133]				chr16p13
57407	NMRAL1	NmrA like redox sensor 1 [Source:HGNC Symbol;Acc:HGNC:24987]				chr16p13
64285	RHBDF1	rhomboid 5 homolog 1 [Source:HGNC Symbol;Acc:HGNC:20561]				chr16p13
79006	METRN	meteorin, glial cell differentiation regulator [Source:HGNC Symbol;Acc:HGNC:14151]				chr16p13
79412	KREMEN2	kringle containing transmembrane protein 2 [Source:HGNC Symbol;Acc:HGNC:18797]				chr16p13
84219	WDR24	WD repeat domain 24 [Source:HGNC Symbol;Acc:HGNC:20852]				chr16p13
84326	METTL26	methyltransferase like 26 [Source:HGNC Symbol;Acc:HGNC:14141]				chr16p13
8938	BAIAP3	BAI1 associated protein 3 [Source:HGNC Symbol;Acc:HGNC:948]				chr16p13
90861	JPT2	Jupiter microtubule associated homolog 2 [Source:HGNC Symbol;Acc:HGNC:14137]				chr16p13
1212	CLTB	clathrin light chain B [Source:HGNC Symbol;Acc:HGNC:2091]					chr5q35
1482	NKX2-5	NK2 homeobox 5 [Source:HGNC Symbol;Acc:HGNC:2488]					chr5q35
22838	RNF44	ring finger protein 44 [Source:HGNC Symbol;Acc:HGNC:19180]					chr5q35
23567	ZNF346	zinc finger protein 346 [Source:HGNC Symbol;Acc:HGNC:16403]					chr5q35
285676	ZNF454	zinc finger protein 454 [Source:HGNC Symbol;Acc:HGNC:21200]					chr5q35
375484	SIMC1	SUMO interacting motifs containing 1 [Source:HGNC Symbol;Acc:HGNC:24779]					chr5q35
54732	TMED9	transmembrane p24 trafficking protein 9 [Source:HGNC Symbol;Acc:HGNC:24878]					chr5q35
84321	THOC3	THO complex 3 [Source:HGNC Symbol;Acc:HGNC:19072]					chr5q35
84851	TRIM52	tripartite motif containing 52 [Source:HGNC Symbol;Acc:HGNC:19024]					chr5q35
85007	PHYKPL	5-phosphohydroxy-L-lysine phospho-lyase [Source:HGNC Symbol;Acc:HGNC:28249]					chr5q35
94081	SFXN1	sideroflexin 1 [Source:HGNC Symbol;Acc:HGNC:16085]					chr5q35
10287	RGS19	regulator of G protein signaling 19 [Source:HGNC Symbol;Acc:HGNC:13735]						chr20q13
10732	TCFL5	transcription factor like 5 [Source:HGNC Symbol;Acc:HGNC:11646]						chr20q13
11054	OGFR	opioid growth factor receptor [Source:HGNC Symbol;Acc:HGNC:15768]						chr20q13
140701	ABHD16B	abhydrolase domain containing 16B [Source:HGNC Symbol;Acc:HGNC:16128]						chr20q13
149986	LSM14B	LSM family member 14B [Source:HGNC Symbol;Acc:HGNC:15887]						chr20q13
4987	OPRL1	opioid related nociceptin receptor 1 [Source:HGNC Symbol;Acc:HGNC:8155]						chr20q13
55251	PCMTD2	protein-L-isoaspartate (D-aspartate) O-methyltransferase domain containing 2 [Source:HGNC Symbol;Acc:HGNC:15882]						chr20q13
55257	MRGBP	MRG domain binding protein [Source:HGNC Symbol;Acc:HGNC:15866]						chr20q13
55661	DDX27	DEAD-box helicase 27 [Source:HGNC Symbol;Acc:HGNC:15837]						chr20q13
57642	COL20A1	collagen type XX alpha 1 chain [Source:HGNC Symbol;Acc:HGNC:14670]						chr20q13
7022	TFAP2C	transcription factor AP-2 gamma [Source:HGNC Symbol;Acc:HGNC:11744]						chr20q13
7165	TPD52L2	TPD52 like 2 [Source:HGNC Symbol;Acc:HGNC:12007]						chr20q13
79025	FNDC11	fibronectin type III domain containing 11 [Source:HGNC Symbol;Acc:HGNC:28764]						chr20q13
81027	TUBB1	tubulin beta 1 class VI [Source:HGNC Symbol;Acc:HGNC:16257]						chr20q13
8771	TNFRSF6B	TNF receptor superfamily member 6b [Source:HGNC Symbol;Acc:HGNC:11921]						chr20q13
100170841	EPOP	elongin BC and polycomb repressive complex 2 associated protein [Source:HGNC Symbol;Acc:HGNC:34493]							chr17q12
11072	DUSP14	dual specificity phosphatase 14 [Source:HGNC Symbol;Acc:HGNC:17007]							chr17q12
146853	C17orf50	chromosome 17 open reading frame 50 [Source:HGNC Symbol;Acc:HGNC:29581]							chr17q12
201299	RDM1	RAD52 motif containing 1 [Source:HGNC Symbol;Acc:HGNC:19950]							chr17q12
2064	ERBB2	erb-b2 receptor tyrosine kinase 2 [Source:HGNC Symbol;Acc:HGNC:3430]							chr17q12
5892	RAD51D	RAD51 paralog D [Source:HGNC Symbol;Acc:HGNC:9823]							chr17q12
79922	MRM1	mitochondrial rRNA methyltransferase 1 [Source:HGNC Symbol;Acc:HGNC:26202]							chr17q12
84299	MIEN1	migration and invasion enhancer 1 [Source:HGNC Symbol;Acc:HGNC:28230]							chr17q12
23029	RBM34	RNA binding motif protein 34 [Source:HGNC Symbol;Acc:HGNC:28965]								chr1q42
3930	LBR	lamin B receptor [Source:HGNC Symbol;Acc:HGNC:6518]								chr1q42
4811	NID1	nidogen 1 [Source:HGNC Symbol;Acc:HGNC:7821]								chr1q42
54627	MAP10	microtubule associated protein 10 [Source:HGNC Symbol;Acc:HGNC:29265]								chr1q42
5867	RAB4A	RAB4A, member RAS oncogene family [Source:HGNC Symbol;Acc:HGNC:9781]								chr1q42
64801	ARV1	ARV1 homolog, fatty acid homeostasis modulator [Source:HGNC Symbol;Acc:HGNC:29561]								chr1q42
6894	TARBP1	TAR (HIV-1) RNA binding protein 1 [Source:HGNC Symbol;Acc:HGNC:11568]								chr1q42
7107	GPR137B	G protein-coupled receptor 137B [Source:HGNC Symbol;Acc:HGNC:11862]								chr1q42
79169	C1orf35	chromosome 1 open reading frame 35 [Source:HGNC Symbol;Acc:HGNC:19032]								chr1q42
80003	PCNX2	pecanex 2 [Source:HGNC Symbol;Acc:HGNC:8736]								chr1q42
100288323	KRTAP21-3	keratin associated protein 21-3 [Source:HGNC Symbol;Acc:HGNC:34216]
1291	COL6A1	collagen type VI alpha 1 chain [Source:HGNC Symbol;Acc:HGNC:2211]
25825	BACE2	beta-secretase 2 [Source:HGNC Symbol;Acc:HGNC:934]
386676	KRTAP10-9	keratin associated protein 10-9 [Source:HGNC Symbol;Acc:HGNC:22971]
4600	MX2	MX dynamin like GTPase 2 [Source:HGNC Symbol;Acc:HGNC:7533]
49854	ZBTB21	zinc finger and BTB domain containing 21 [Source:HGNC Symbol;Acc:HGNC:13083]
51227	PIGP	phosphatidylinositol glycan anchor biosynthesis class P [Source:HGNC Symbol;Acc:HGNC:3046]
5211	PFKL	phosphofructokinase, liver type [Source:HGNC Symbol;Acc:HGNC:8876]
54058	C21orf58	chromosome 21 open reading frame 58 [Source:HGNC Symbol;Acc:HGNC:1300]
6651	SON	SON DNA and RNA binding protein [Source:HGNC Symbol;Acc:HGNC:11183]
873	CBR1	carbonyl reductase 1 [Source:HGNC Symbol;Acc:HGNC:1548]
9619	ABCG1	ATP binding cassette subfamily G member 1 [Source:HGNC Symbol;Acc:HGNC:73]
2195	FAT1	FAT atypical cadherin 1 [Source:HGNC Symbol;Acc:HGNC:3595]
2483	FRG1	FSHD region gene 1 [Source:HGNC Symbol;Acc:HGNC:3954]
291	SLC25A4	solute carrier family 25 member 4 [Source:HGNC Symbol;Acc:HGNC:10990]
3622	ING2	inhibitor of growth family member 2 [Source:HGNC Symbol;Acc:HGNC:6063]
4543	MTNR1A	melatonin receptor 1A [Source:HGNC Symbol;Acc:HGNC:7463]
55602	CDKN2AIP	CDKN2A interacting protein [Source:HGNC Symbol;Acc:HGNC:24325]
10040	TOM1L1	target of myb1 like 1 membrane trafficking protein [Source:HGNC Symbol;Acc:HGNC:11983]
4025	LPO	lactoperoxidase [Source:HGNC Symbol;Acc:HGNC:6678]
55181	SMG8	SMG8 nonsense mediated mRNA decay factor [Source:HGNC Symbol;Acc:HGNC:25551]
8161	COIL	coilin [Source:HGNC Symbol;Acc:HGNC:2184]
8526	DGKE	diacylglycerol kinase epsilon [Source:HGNC Symbol;Acc:HGNC:2852]
663	BNIP2	BCL2 interacting protein 2 [Source:HGNC Symbol;Acc:HGNC:1083]
7168	TPM1	tropomyosin 1 [Source:HGNC Symbol;Acc:HGNC:12010]
79811	SLTM	SAFB like transcription modulator [Source:HGNC Symbol;Acc:HGNC:20709]
79856	SNX22	sorting nexin 22 [Source:HGNC Symbol;Acc:HGNC:16315]
83660	TLN2	talin 2 [Source:HGNC Symbol;Acc:HGNC:15447]
8766	RAB11A	RAB11A, member RAS oncogene family [Source:HGNC Symbol;Acc:HGNC:9760]
138311	DIPK1B	divergent protein kinase domain 1B [Source:HGNC Symbol;Acc:HGNC:28290]
158062	LCN6	lipocalin 6 [Source:HGNC Symbol;Acc:HGNC:17337]
1759	DNM1	dynamin 1 [Source:HGNC Symbol;Acc:HGNC:2972]
23064	SETX	senataxin [Source:HGNC Symbol;Acc:HGNC:445]
26012	NSMF	NMDA receptor synaptonuclear signaling and neuronal migration factor [Source:HGNC Symbol;Acc:HGNC:29843]
401565	FAM166A	family with sequence similarity 166 member A [Source:HGNC Symbol;Acc:HGNC:33818]
441478	NRARP	NOTCH regulated ankyrin repeat protein [Source:HGNC Symbol;Acc:HGNC:33843]
5524	PTPA	protein phosphatase 2 phosphatase activator [Source:HGNC Symbol;Acc:HGNC:9308]
8818	DPM2	dolichyl-phosphate mannosyltransferase subunit 2, regulatory [Source:HGNC Symbol;Acc:HGNC:3006]
92714	ARRDC1	arrestin domain containing 1 [Source:HGNC Symbol;Acc:HGNC:28633]
285613	RELL2	RELT like 2 [Source:HGNC Symbol;Acc:HGNC:26902]
5098	PCDHGC3	protocadherin gamma subfamily C, 3 [Source:HGNC Symbol;Acc:HGNC:8716]
51306	FAM13B	family with sequence similarity 13 member B [Source:HGNC Symbol;Acc:HGNC:1335]
5201	PFDN1	prefoldin subunit 1 [Source:HGNC Symbol;Acc:HGNC:8866]
56121	PCDHB15	protocadherin beta 15 [Source:HGNC Symbol;Acc:HGNC:8686]
6584	SLC22A5	solute carrier family 22 member 5 [Source:HGNC Symbol;Acc:HGNC:10969]
91368	CDKN2AIPNL	CDKN2A interacting protein N-terminal like [Source:HGNC Symbol;Acc:HGNC:30545]
9555	MACROH2A1	macroH2A.1 histone [Source:HGNC Symbol;Acc:HGNC:4740]
995	CDC25C	cell division cycle 25C [Source:HGNC Symbol;Acc:HGNC:1727]
154141	MBOAT1	membrane bound O-acyltransferase domain containing 1 [Source:HGNC Symbol;Acc:HGNC:21579]
3012	H2AC8	H2A clustered histone 8 [Source:HGNC Symbol;Acc:HGNC:4724]
346171	ZFP57	ZFP57 zinc finger protein [Source:HGNC Symbol;Acc:HGNC:18791]
4340	MOG	myelin oligodendrocyte glycoprotein [Source:HGNC Symbol;Acc:HGNC:7197]
8335	H2AC4	H2A clustered histone 4 [Source:HGNC Symbol;Acc:HGNC:4734]
8336	H2AC17	H2A clustered histone 17 [Source:HGNC Symbol;Acc:HGNC:4735]
8350	H3C1	H3 clustered histone 1 [Source:HGNC Symbol;Acc:HGNC:4766]
84062	DTNBP1	dystrobrevin binding protein 1 [Source:HGNC Symbol;Acc:HGNC:17328]
85235	H2AC12	H2A clustered histone 12 [Source:HGNC Symbol;Acc:HGNC:13671]
8970	H2BC11	H2B clustered histone 11 [Source:HGNC Symbol;Acc:HGNC:4761]
10336	PCGF3	polycomb group ring finger 3 [Source:HGNC Symbol;Acc:HGNC:10066]
10460	TACC3	transforming acidic coiled-coil containing protein 3 [Source:HGNC Symbol;Acc:HGNC:11524]
114932	MRFAP1L1	Morf4 family associated protein 1 like 1 [Source:HGNC Symbol;Acc:HGNC:28796]
170960	ZNF721	zinc finger protein 721 [Source:HGNC Symbol;Acc:HGNC:29425]
5522	PPP2R2C	protein phosphatase 2 regulatory subunit Bgamma [Source:HGNC Symbol;Acc:HGNC:9306]
6002	RGS12	regulator of G protein signaling 12 [Source:HGNC Symbol;Acc:HGNC:9994]
6047	RNF4	ring finger protein 4 [Source:HGNC Symbol;Acc:HGNC:10067]
152002	XXYLT1	xyloside xylosyltransferase 1 [Source:HGNC Symbol;Acc:HGNC:26639]
200931	SLC51A	solute carrier family 51 subunit alpha [Source:HGNC Symbol;Acc:HGNC:29955]
200958	MUC20	mucin 20, cell surface associated [Source:HGNC Symbol;Acc:HGNC:23282]
3280	HES1	hes family bHLH transcription factor 1 [Source:HGNC Symbol;Acc:HGNC:5192]
5504	PPP1R2	protein phosphatase 1 regulatory inhibitor subunit 2 [Source:HGNC Symbol;Acc:HGNC:9288]
1444	CSHL1	chorionic somatomammotropin hormone like 1 [Source:HGNC Symbol;Acc:HGNC:2442]
2689	GH2	growth hormone 2 [Source:HGNC Symbol;Acc:HGNC:4262]
54828	BCAS3	BCAS3 microtubule associated cell migration factor [Source:HGNC Symbol;Acc:HGNC:14347]
80774	LIMD2	LIM domain containing 2 [Source:HGNC Symbol;Acc:HGNC:28142]
140809	SRXN1	sulfiredoxin 1 [Source:HGNC Symbol;Acc:HGNC:16132]
642636	RAD21L1	RAD21 cohesin complex component like 1 [Source:HGNC Symbol;Acc:HGNC:16271]
9491	PSMF1	proteasome inhibitor subunit 1 [Source:HGNC Symbol;Acc:HGNC:9571]
9751	SNPH	syntaphilin [Source:HGNC Symbol;Acc:HGNC:15931]
10121	ACTR1A	actin related protein 1A [Source:HGNC Symbol;Acc:HGNC:167]
22978	NT5C2	5'-nucleotidase, cytosolic II [Source:HGNC Symbol;Acc:HGNC:8022]
26507	CNNM1	cyclin and CBS domain divalent metal cation transport mediator 1 [Source:HGNC Symbol;Acc:HGNC:102]
55361	PI4K2A	phosphatidylinositol 4-kinase type 2 alpha [Source:HGNC Symbol;Acc:HGNC:30031]
84833	ATP5MD	ATP synthase membrane subunit DAPIT [Source:HGNC Symbol;Acc:HGNC:30889]
11158	RABL2B	RAB, member of RAS oncogene family like 2B [Source:HGNC Symbol;Acc:HGNC:9800]
1375	CPT1B	carnitine palmitoyltransferase 1B [Source:HGNC Symbol;Acc:HGNC:2329]
27351	DESI1	desumoylating isopeptidase 1 [Source:HGNC Symbol;Acc:HGNC:24577]
410	ARSA	arylsulfatase A [Source:HGNC Symbol;Acc:HGNC:713]
6305	SBF1	SET binding factor 1 [Source:HGNC Symbol;Acc:HGNC:10542]
9582	APOBEC3B	apolipoprotein B mRNA editing enzyme catalytic subunit 3B [Source:HGNC Symbol;Acc:HGNC:17352]
9929	JOSD1	Josephin domain containing 1 [Source:HGNC Symbol;Acc:HGNC:28953]
1316	KLF6	Kruppel like factor 6 [Source:HGNC Symbol;Acc:HGNC:2235]
54906	TASOR2	transcription activation suppressor family member 2 [Source:HGNC Symbol;Acc:HGNC:23484]
84893	FBH1	F-box DNA helicase 1 [Source:HGNC Symbol;Acc:HGNC:13620]
10539	GLRX3	glutaredoxin 3 [Source:HGNC Symbol;Acc:HGNC:15987]
118611	C10orf90	chromosome 10 open reading frame 90 [Source:HGNC Symbol;Acc:HGNC:26563]
119467	CLRN3	clarin 3 [Source:HGNC Symbol;Acc:HGNC:20795]
399818	EEF1AKMT2	EEF1A lysine methyltransferase 2 [Source:HGNC Symbol;Acc:HGNC:33787]
54777	CFAP46	cilia and flagella associated protein 46 [Source:HGNC Symbol;Acc:HGNC:25247]
10741	RBBP9	RB binding protein 9, serine hydrolase [Source:HGNC Symbol;Acc:HGNC:9892]
1470	CST2	cystatin SA [Source:HGNC Symbol;Acc:HGNC:2474]
1471	CST3	cystatin C [Source:HGNC Symbol;Acc:HGNC:2475]
1473	CST5	cystatin D [Source:HGNC Symbol;Acc:HGNC:2477]
3843	IPO5	importin 5 [Source:HGNC Symbol;Acc:HGNC:6402]
5911	RAP2A	RAP2A, member of RAS oncogene family [Source:HGNC Symbol;Acc:HGNC:9861]
9375	TM9SF2	transmembrane 9 superfamily member 2 [Source:HGNC Symbol;Acc:HGNC:11865]
10493	VAT1	vesicle amine transport 1 [Source:HGNC Symbol;Acc:HGNC:16919]
10609	P3H4	prolyl 3-hydroxylase family member 4 (inactive) [Source:HGNC Symbol;Acc:HGNC:16946]
3219	HOXB9	homeobox B9 [Source:HGNC Symbol;Acc:HGNC:5120]
379	ARL4D	ADP ribosylation factor like GTPase 4D [Source:HGNC Symbol;Acc:HGNC:656]
516	ATP5MC1	ATP synthase membrane subunit c locus 1 [Source:HGNC Symbol;Acc:HGNC:841]
55316	RSAD1	radical S-adenosyl methionine domain containing 1 [Source:HGNC Symbol;Acc:HGNC:25634]
65264	UBE2Z	ubiquitin conjugating enzyme E2 Z [Source:HGNC Symbol;Acc:HGNC:25847]
6776	STAT5A	signal transducer and activator of transcription 5A [Source:HGNC Symbol;Acc:HGNC:11366]
91369	ANKRD40	ankyrin repeat domain 40 [Source:HGNC Symbol;Acc:HGNC:28233]
51072	MEMO1	mediator of cell motility 1 [Source:HGNC Symbol;Acc:HGNC:14014]
57448	BIRC6	baculoviral IAP repeat containing 6 [Source:HGNC Symbol;Acc:HGNC:13516]
6801	STRN	striatin [Source:HGNC Symbol;Acc:HGNC:11424]
115817	DHRS1	dehydrogenase/reductase 1 [Source:HGNC Symbol;Acc:HGNC:16445]
23256	SCFD1	sec1 family domain containing 1 [Source:HGNC Symbol;Acc:HGNC:20726]
26277	TINF2	TERF1 interacting nuclear factor 2 [Source:HGNC Symbol;Acc:HGNC:11824]
259232	NALCN	sodium leak channel, non-selective [Source:HGNC Symbol;Acc:HGNC:19082]
55082	ARGLU1	arginine and glutamate rich 1 [Source:HGNC Symbol;Acc:HGNC:25482]
11001	SLC27A2	solute carrier family 27 member 2 [Source:HGNC Symbol;Acc:HGNC:10996]
2585	GALK2	galactokinase 2 [Source:HGNC Symbol;Acc:HGNC:4119]
283652	SLC24A5	solute carrier family 24 member 5 [Source:HGNC Symbol;Acc:HGNC:20611]
9728	SECISBP2L	SECIS binding protein 2 like [Source:HGNC Symbol;Acc:HGNC:28997]
100506581	C16orf95	chromosome 16 open reading frame 95 [Source:HGNC Symbol;Acc:HGNC:40033]
79007	DBNDD1	dysbindin domain containing 1 [Source:HGNC Symbol;Acc:HGNC:28455]
8140	SLC7A5	solute carrier family 7 member 5 [Source:HGNC Symbol;Acc:HGNC:11063]
3208	HPCA	hippocalcin [Source:HGNC Symbol;Acc:HGNC:5144]
5511	PPP1R8	protein phosphatase 1 regulatory subunit 8 [Source:HGNC Symbol;Acc:HGNC:9296]
6118	RPA2	replication protein A2 [Source:HGNC Symbol;Acc:HGNC:10290]
11017	SNRNP27	small nuclear ribonucleoprotein U4/U6.U5 subunit 27 [Source:HGNC Symbol;Acc:HGNC:30240]
5093	PCBP1	poly(rC) binding protein 1 [Source:HGNC Symbol;Acc:HGNC:8647]
9027	NAT8	N-acetyltransferase 8 (putative) [Source:HGNC Symbol;Acc:HGNC:18069]
10898	CPSF4	cleavage and polyadenylation specific factor 4 [Source:HGNC Symbol;Acc:HGNC:2327]
10980	COPS6	COP9 signalosome subunit 6 [Source:HGNC Symbol;Acc:HGNC:21749]
389541	LAMTOR4	late endosomal/lysosomal adaptor, MAPK and MTOR activator 4 [Source:HGNC Symbol;Acc:HGNC:33772]
64599	GIGYF1	GRB10 interacting GYF protein 1 [Source:HGNC Symbol;Acc:HGNC:9126]
51366	UBR5	ubiquitin protein ligase E3 component n-recognin 5 [Source:HGNC Symbol;Acc:HGNC:16806]
79815	NIPAL2	NIPA like domain containing 2 [Source:HGNC Symbol;Acc:HGNC:25854]
79977	GRHL2	grainyhead like transcription factor 2 [Source:HGNC Symbol;Acc:HGNC:2799]
10236	HNRNPR	heterogeneous nuclear ribonucleoprotein R [Source:HGNC Symbol;Acc:HGNC:5047]
11315	PARK7	Parkinsonism associated deglycase [Source:HGNC Symbol;Acc:HGNC:16369]
116983	ACAP3	ArfGAP with coiled-coil, ankyrin repeat and PH domains 3 [Source:HGNC Symbol;Acc:HGNC:16754]
148398	SAMD11	sterile alpha motif domain containing 11 [Source:HGNC Symbol;Acc:HGNC:28706]
199990	FAAP20	FA core complex associated protein 20 [Source:HGNC Symbol;Acc:HGNC:26428]
339453	TMEM240	transmembrane protein 240 [Source:HGNC Symbol;Acc:HGNC:25186]
375790	AGRN	agrin [Source:HGNC Symbol;Acc:HGNC:329]
51150	SDF4	stromal cell derived factor 4 [Source:HGNC Symbol;Acc:HGNC:24188]
83715	ESPN	espin [Source:HGNC Symbol;Acc:HGNC:13281]
90326	THAP3	THAP domain containing 3 [Source:HGNC Symbol;Acc:HGNC:20855]
79609	VCPKMT	valosin containing protein lysine methyltransferase [Source:HGNC Symbol;Acc:HGNC:20352]
9147	NEMF	nuclear export mediator factor [Source:HGNC Symbol;Acc:HGNC:10663]
284018	C17orf58	chromosome 17 open reading frame 58 [Source:HGNC Symbol;Acc:HGNC:27568]
9931	HELZ	helicase with zinc finger [Source:HGNC Symbol;Acc:HGNC:16878]
11188	NISCH	nischarin [Source:HGNC Symbol;Acc:HGNC:18006]
25930	PTPN23	protein tyrosine phosphatase non-receptor type 23 [Source:HGNC Symbol;Acc:HGNC:14406]
389119	INKA1	inka box actin regulator 1 [Source:HGNC Symbol;Acc:HGNC:32480]
4485	MST1	macrophage stimulating 1 [Source:HGNC Symbol;Acc:HGNC:7380]
7866	IFRD2	interferon related developmental regulator 2 [Source:HGNC Symbol;Acc:HGNC:5457]
598	BCL2L1	BCL2 like 1 [Source:HGNC Symbol;Acc:HGNC:992]
6676	SPAG4	sperm associated antigen 4 [Source:HGNC Symbol;Acc:HGNC:11214]
81502	HM13	histocompatibility minor 13 [Source:HGNC Symbol;Acc:HGNC:16435]
9584	RBM39	RNA binding motif protein 39 [Source:HGNC Symbol;Acc:HGNC:15923]
5868	RAB5A	RAB5A, member RAS oncogene family [Source:HGNC Symbol;Acc:HGNC:9783]
7068	THRB	thyroid hormone receptor beta [Source:HGNC Symbol;Acc:HGNC:11799]
11269	DDX19B	DEAD-box helicase 19B [Source:HGNC Symbol;Acc:HGNC:2742]
84342	COG8	component of oligomeric golgi complex 8 [Source:HGNC Symbol;Acc:HGNC:18623]
8717	TRADD	TNFRSF1A associated via death domain [Source:HGNC Symbol;Acc:HGNC:12030]
23424	TDRD7	tudor domain containing 7 [Source:HGNC Symbol;Acc:HGNC:30831]
4920	ROR2	receptor tyrosine kinase like orphan receptor 2 [Source:HGNC Symbol;Acc:HGNC:10257]
7507	XPA	XPA, DNA damage recognition and repair factor [Source:HGNC Symbol;Acc:HGNC:12814]
124641	OVCA2	OVCA2 serine hydrolase domain containing [Source:HGNC Symbol;Acc:HGNC:24203]
23108	RAP1GAP2	RAP1 GTPase activating protein 2 [Source:HGNC Symbol;Acc:HGNC:29176]
4335	MNT	MAX network transcriptional repressor [Source:HGNC Symbol;Acc:HGNC:7188]
4927	NUP88	nucleoporin 88 [Source:HGNC Symbol;Acc:HGNC:8067]
84268	RPAIN	RPA interacting protein [Source:HGNC Symbol;Acc:HGNC:28641]
131408	FAM131A	family with sequence similarity 131 member A [Source:HGNC Symbol;Acc:HGNC:28308]
6434	TRA2B	transformer 2 beta homolog [Source:HGNC Symbol;Acc:HGNC:10781]
10016	PDCD6	programmed cell death 6 [Source:HGNC Symbol;Acc:HGNC:8765]
153478	PLEKHG4B	pleckstrin homology and RhoGEF domain containing G4B [Source:HGNC Symbol;Acc:HGNC:29399]
170690	ADAMTS16	ADAM metallopeptidase with thrombospondin type 1 motif 16 [Source:HGNC Symbol;Acc:HGNC:17108]
1119	CHKA	choline kinase alpha [Source:HGNC Symbol;Acc:HGNC:1937]
22992	KDM2A	lysine demethylase 2A [Source:HGNC Symbol;Acc:HGNC:13606]
283212	KLHL35	kelch like family member 35 [Source:HGNC Symbol;Acc:HGNC:26597]
4296	MAP3K11	mitogen-activated protein kinase kinase kinase 11 [Source:HGNC Symbol;Acc:HGNC:6850]
741	ZNHIT2	zinc finger HIT-type containing 2 [Source:HGNC Symbol;Acc:HGNC:1177]
9092	SART1	spliceosome associated factor 1, recruiter of U4/U6.U5 tri-snRNP [Source:HGNC Symbol;Acc:HGNC:10538]
10950	BTG3	BTG anti-proliferation factor 3 [Source:HGNC Symbol;Acc:HGNC:1132]
26046	LTN1	listerin E3 ubiquitin protein ligase 1 [Source:HGNC Symbol;Acc:HGNC:13082]
29063	ZCCHC4	zinc finger CCHC-type containing 4 [Source:HGNC Symbol;Acc:HGNC:22917]
64151	NCAPG	non-SMC condensin I complex subunit G [Source:HGNC Symbol;Acc:HGNC:24304]
10285	SMNDC1	survival motor neuron domain containing 1 [Source:HGNC Symbol;Acc:HGNC:16900]
4601	MXI1	MAX interactor 1, dimerization protein [Source:HGNC Symbol;Acc:HGNC:7534]
7277	TUBA4A	tubulin alpha 4a [Source:HGNC Symbol;Acc:HGNC:12407]
9125	CNOT9	CCR4-NOT transcription complex subunit 9 [Source:HGNC Symbol;Acc:HGNC:10445]
3581	IL9R	interleukin 9 receptor [Source:HGNC Symbol;Acc:HGNC:6030]
5956	OPN1LW	opsin 1, long wave sensitive [Source:HGNC Symbol;Acc:HGNC:9936]
7739	ZNF185	zinc finger protein 185 with LIM domain [Source:HGNC Symbol;Acc:HGNC:12976]
136991	ASZ1	ankyrin repeat, SAM and basic leucine zipper domain containing 1 [Source:HGNC Symbol;Acc:HGNC:1350]
54556	ING3	inhibitor of growth family member 3 [Source:HGNC Symbol;Acc:HGNC:14587]
22950	SLC4A1AP	solute carrier family 4 member 1 adaptor protein [Source:HGNC Symbol;Acc:HGNC:13813]
9540	TP53I3	tumor protein p53 inducible protein 3 [Source:HGNC Symbol;Acc:HGNC:19373]
155051	CRYGN	crystallin gamma N [Source:HGNC Symbol;Acc:HGNC:20458]
155054	ZNF425	zinc finger protein 425 [Source:HGNC Symbol;Acc:HGNC:20690]
51011	FAHD2A	fumarylacetoacetate hydrolase domain containing 2A [Source:HGNC Symbol;Acc:HGNC:24252]
55683	KANSL3	KAT8 regulatory NSL complex subunit 3 [Source:HGNC Symbol;Acc:HGNC:25473]
203522	INTS6L	integrator complex subunit 6 like [Source:HGNC Symbol;Acc:HGNC:27334]
55609	ZNF280C	zinc finger protein 280C [Source:HGNC Symbol;Acc:HGNC:25955]
10015	PDCD6IP	programmed cell death 6 interacting protein [Source:HGNC Symbol;Acc:HGNC:8766]
9852	EPM2AIP1	EPM2A interacting protein 1 [Source:HGNC Symbol;Acc:HGNC:19735]
29937	NENF	neudesin neurotrophic factor [Source:HGNC Symbol;Acc:HGNC:30384]
56950	SMYD2	SET and MYND domain containing 2 [Source:HGNC Symbol;Acc:HGNC:20982]
84919	PPP1R15B	protein phosphatase 1 regulatory subunit 15B [Source:HGNC Symbol;Acc:HGNC:14951]
154791	FMC1	formation of mitochondrial complex V assembly factor 1 homolog [Source:HGNC Symbol;Acc:HGNC:26946]
90956	ADCK2	aarF domain containing kinase 2 [Source:HGNC Symbol;Acc:HGNC:19039]
221424	LRRC73	leucine rich repeat containing 73 [Source:HGNC Symbol;Acc:HGNC:21375]
3107	HLA-C	major histocompatibility complex, class I, C [Source:HGNC Symbol;Acc:HGNC:4933]
4794	NFKBIE	NFKB inhibitor epsilon [Source:HGNC Symbol;Acc:HGNC:7799]
6046	BRD2	bromodomain containing 2 [Source:HGNC Symbol;Acc:HGNC:1103]
9277	WDR46	WD repeat domain 46 [Source:HGNC Symbol;Acc:HGNC:13923]
23234	DNAJC9	DnaJ heat shock protein family (Hsp40) member C9 [Source:HGNC Symbol;Acc:HGNC:19123]
80195	TMEM254	transmembrane protein 254 [Source:HGNC Symbol;Acc:HGNC:25804]
51329	ARL6IP4	ADP ribosylation factor like GTPase 6 interacting protein 4 [Source:HGNC Symbol;Acc:HGNC:18076]
54434	SSH1	slingshot protein phosphatase 1 [Source:HGNC Symbol;Acc:HGNC:30579]
54509	RHOF	ras homolog family member F, filopodia associated [Source:HGNC Symbol;Acc:HGNC:15703]
57634	EP400	E1A binding protein p400 [Source:HGNC Symbol;Acc:HGNC:11958]
25912	C1orf43	chromosome 1 open reading frame 43 [Source:HGNC Symbol;Acc:HGNC:29876]
653604	H3C13	H3 clustered histone 13 [Source:HGNC Symbol;Acc:HGNC:25311]
81611	ANP32E	acidic nuclear phosphoprotein 32 family member E [Source:HGNC Symbol;Acc:HGNC:16673]
8338	H2AC20	H2A clustered histone 20 [Source:HGNC Symbol;Acc:HGNC:4738]
388969	C2orf68	chromosome 2 open reading frame 68 [Source:HGNC Symbol;Acc:HGNC:34353]
56888	KCMF1	potassium channel modulatory factor 1 [Source:HGNC Symbol;Acc:HGNC:20589]
4733	DRG1	developmentally regulated GTP binding protein 1 [Source:HGNC Symbol;Acc:HGNC:3029]
51537	MTFP1	mitochondrial fission process 1 [Source:HGNC Symbol;Acc:HGNC:26945]
1382	CRABP2	cellular retinoic acid binding protein 2 [Source:HGNC Symbol;Acc:HGNC:2339]
3310	HSPA6	heat shock protein family A (Hsp70) member 6 [Source:HGNC Symbol;Acc:HGNC:5239]
8106	PABPN1	poly(A) binding protein nuclear 1 [Source:HGNC Symbol;Acc:HGNC:8565]
8906	AP1G2	adaptor related protein complex 1 subunit gamma 2 [Source:HGNC Symbol;Acc:HGNC:556]
90673	PPP1R3E	protein phosphatase 1 regulatory subunit 3E [Source:HGNC Symbol;Acc:HGNC:14943]
26512	INTS6	integrator complex subunit 6 [Source:HGNC Symbol;Acc:HGNC:14879]
83548	COG3	component of oligomeric golgi complex 3 [Source:HGNC Symbol;Acc:HGNC:18619]
23753	SDF2L1	stromal cell derived factor 2 like 1 [Source:HGNC Symbol;Acc:HGNC:10676]
91227	GGTLC2	gamma-glutamyltransferase light chain 2 [Source:HGNC Symbol;Acc:HGNC:18596]
9342	SNAP29	synaptosome associated protein 29 [Source:HGNC Symbol;Acc:HGNC:11133]
118426	BORCS5	BLOC-1 related complex subunit 5 [Source:HGNC Symbol;Acc:HGNC:17950]
81575	APOLD1	apolipoprotein L domain containing 1 [Source:HGNC Symbol;Acc:HGNC:25268]
3226	HOXC10	homeobox C10 [Source:HGNC Symbol;Acc:HGNC:5122]
5094	PCBP2	poly(rC) binding protein 2 [Source:HGNC Symbol;Acc:HGNC:8648]
1983	EIF5	eukaryotic translation initiation factor 5 [Source:HGNC Symbol;Acc:HGNC:3299]
55671	PPP4R3A	protein phosphatase 4 regulatory subunit 3A [Source:HGNC Symbol;Acc:HGNC:20219]
7528	YY1	YY1 transcription factor [Source:HGNC Symbol;Acc:HGNC:12856]
374875	HSD11B1L	hydroxysteroid 11-beta dehydrogenase 1 like [Source:HGNC Symbol;Acc:HGNC:30419]
51398	WDR83OS	WD repeat domain 83 opposite strand [Source:HGNC Symbol;Acc:HGNC:30203]
58509	CACTIN	cactin, spliceosome C complex subunit [Source:HGNC Symbol;Acc:HGNC:29938]
81576	CCDC130	coiled-coil domain containing 130 [Source:HGNC Symbol;Acc:HGNC:28118]
341	APOC1	apolipoprotein C1 [Source:HGNC Symbol;Acc:HGNC:607]
644096	SDHAF1	succinate dehydrogenase complex assembly factor 1 [Source:HGNC Symbol;Acc:HGNC:33867]
7593	MZF1	myeloid zinc finger 1 [Source:HGNC Symbol;Acc:HGNC:13108]
79171	RBM42	RNA binding motif protein 42 [Source:HGNC Symbol;Acc:HGNC:28117]
84878	ZBTB45	zinc finger and BTB domain containing 45 [Source:HGNC Symbol;Acc:HGNC:23715]
8241	RBM10	RNA binding motif protein 10 [Source:HGNC Symbol;Acc:HGNC:9896]
79080	CCDC86	coiled-coil domain containing 86 [Source:HGNC Symbol;Acc:HGNC:28359]
10465	PPIH	peptidylprolyl isomerase H [Source:HGNC Symbol;Acc:HGNC:14651]
146540	ZNF785	zinc finger protein 785 [Source:HGNC Symbol;Acc:HGNC:26496]
83451	ABHD11	abhydrolase domain containing 11 [Source:HGNC Symbol;Acc:HGNC:16407]
170082	TCEANC	transcription elongation factor A N-terminal and central domain containing [Source:HGNC Symbol;Acc:HGNC:28277]
283537	SLC46A3	solute carrier family 46 member 3 [Source:HGNC Symbol;Acc:HGNC:27501]
8880	FUBP1	far upstream element binding protein 1 [Source:HGNC Symbol;Acc:HGNC:4004]
84811	BUD13	BUD13 homolog [Source:HGNC Symbol;Acc:HGNC:28199]
23451	SF3B1	splicing factor 3b subunit 1 [Source:HGNC Symbol;Acc:HGNC:10768]
10239	AP3S2	adaptor related protein complex 3 subunit sigma 2 [Source:HGNC Symbol;Acc:HGNC:571]
5283	PIGH	phosphatidylinositol glycan anchor biosynthesis class H [Source:HGNC Symbol;Acc:HGNC:8964]
9562	MINPP1	multiple inositol-polyphosphate phosphatase 1 [Source:HGNC Symbol;Acc:HGNC:7102]
115106	HAUS1	HAUS augmin like complex subunit 1 [Source:HGNC Symbol;Acc:HGNC:25174]
2619	GAS1	growth arrest specific 1 [Source:HGNC Symbol;Acc:HGNC:4165]
8087	FXR1	FMR1 autosomal homolog 1 [Source:HGNC Symbol;Acc:HGNC:4023]
6734	SRPRA	SRP receptor subunit alpha [Source:HGNC Symbol;Acc:HGNC:11307]
203260	CCDC107	coiled-coil domain containing 107 [Source:HGNC Symbol;Acc:HGNC:28465]
51186	TCEAL9	transcription elongation factor A like 9 [Source:HGNC Symbol;Acc:HGNC:30084]
10477	UBE2E3	ubiquitin conjugating enzyme E2 E3 [Source:HGNC Symbol;Acc:HGNC:12479]
84060	RBM48	RNA binding motif protein 48 [Source:HGNC Symbol;Acc:HGNC:21785]
27072	VPS41	VPS41 subunit of HOPS complex [Source:HGNC Symbol;Acc:HGNC:12713]
4258	MGST2	microsomal glutathione S-transferase 2 [Source:HGNC Symbol;Acc:HGNC:7063]
274	BIN1	bridging integrator 1 [Source:HGNC Symbol;Acc:HGNC:1052]
348995	NUP43	nucleoporin 43 [Source:HGNC Symbol;Acc:HGNC:21182]
112970	KTI12	KTI12 chromatin associated homolog [Source:HGNC Symbol;Acc:HGNC:25160]
10051	SMC4	structural maintenance of chromosomes 4 [Source:HGNC Symbol;Acc:HGNC:14013]
7428	VHL	von Hippel-Lindau tumor suppressor [Source:HGNC Symbol;Acc:HGNC:12687]
4671	NAIP	NLR family apoptosis inhibitory protein [Source:HGNC Symbol;Acc:HGNC:7634]
51585	PCF11	PCF11 cleavage and polyadenylation factor subunit [Source:HGNC Symbol;Acc:HGNC:30097]
64215	DNAJC1	DnaJ heat shock protein family (Hsp40) member C1 [Source:HGNC Symbol;Acc:HGNC:20090]
158135	TTLL11	tubulin tyrosine ligase like 11 [Source:HGNC Symbol;Acc:HGNC:18113]
29080	CCDC59	coiled-coil domain containing 59 [Source:HGNC Symbol;Acc:HGNC:25005]
84674	CARD6	caspase recruitment domain family member 6 [Source:HGNC Symbol;Acc:HGNC:16394]
649	BMP1	bone morphogenetic protein 1 [Source:HGNC Symbol;Acc:HGNC:1067]
4149	MAX	MYC associated factor X [Source:HGNC Symbol;Acc:HGNC:6913]
387103	CENPW	centromere protein W [Source:HGNC Symbol;Acc:HGNC:21488]
642273	FAM110C	family with sequence similarity 110 member C [Source:HGNC Symbol;Acc:HGNC:33340]
27031	NPHP3	nephrocystin 3 [Source:HGNC Symbol;Acc:HGNC:7907]
22943	DKK 1.00	dickkopf WNT signaling pathway inhibitor 1 [Source:HGNC Symbol;Acc:HGNC:2891]
388523	ZNF728	zinc finger protein 728 [Source:HGNC Symbol;Acc:HGNC:32463]
9774	BCLAF1	BCL2 associated transcription factor 1 [Source:HGNC Symbol;Acc:HGNC:16863]
115426	UHRF2	ubiquitin like with PHD and ring finger domains 2 [Source:HGNC Symbol;Acc:HGNC:12557]
55599	RNPC3	RNA binding region (RNP1, RRM) containing 3 [Source:HGNC Symbol;Acc:HGNC:18666]
143884	CWF19L2	CWF19 like cell cycle control factor 2 [Source:HGNC Symbol;Acc:HGNC:26508]
51018	RRP15	ribosomal RNA processing 15 homolog [Source:HGNC Symbol;Acc:HGNC:24255]
8924	HERC2	HECT and RLD domain containing E3 ubiquitin protein ligase 2 [Source:HGNC Symbol;Acc:HGNC:4868]
130888	FBXO36	F-box protein 36 [Source:HGNC Symbol;Acc:HGNC:27020]
81552	VOPP1	VOPP1 WW domain binding protein [Source:HGNC Symbol;Acc:HGNC:34518]
23433	RHOQ	ras homolog family member Q [Source:HGNC Symbol;Acc:HGNC:17736]
7319	UBE2A	ubiquitin conjugating enzyme E2 A [Source:HGNC Symbol;Acc:HGNC:12472]
81608	FIP1L1	factor interacting with PAPOLA and CPSF1 [Source:HGNC Symbol;Acc:HGNC:19124]
6991	DYNLT2	dynein light chain Tctex-type 2 [Source:HGNC Symbol;Acc:HGNC:11695]
28951	TRIB2	tribbles pseudokinase 2 [Source:HGNC Symbol;Acc:HGNC:30809]
79957	PAQR6	progestin and adipoQ receptor family member 6 [Source:HGNC Symbol;Acc:HGNC:30132]
339745	SPOPL	speckle type BTB/POZ protein like [Source:HGNC Symbol;Acc:HGNC:27934]
80185	TTI2	TELO2 interacting protein 2 [Source:HGNC Symbol;Acc:HGNC:26262]
688	KLF5	Kruppel like factor 5 [Source:HGNC Symbol;Acc:HGNC:6349]
8564	KMO	kynurenine 3-monooxygenase [Source:HGNC Symbol;Acc:HGNC:6381]
55837	EAPP	E2F associated phosphoprotein [Source:HGNC Symbol;Acc:HGNC:19312]
3486	IGFBP3	insulin like growth factor binding protein 3 [Source:HGNC Symbol;Acc:HGNC:5472]
9521	EEF1E1	eukaryotic translation elongation factor 1 epsilon 1 [Source:HGNC Symbol;Acc:HGNC:3212]
57117	INTS12	integrator complex subunit 12 [Source:HGNC Symbol;Acc:HGNC:25067]
11052	CPSF6	cleavage and polyadenylation specific factor 6 [Source:HGNC Symbol;Acc:HGNC:13871]
253714	MMS22L	MMS22 like, DNA repair protein [Source:HGNC Symbol;Acc:HGNC:21475]
55660	PRPF40A	pre-mRNA processing factor 40 homolog A [Source:HGNC Symbol;Acc:HGNC:16463]
27107	ZBTB11	zinc finger and BTB domain containing 11 [Source:HGNC Symbol;Acc:HGNC:16740]
10395	DLC1	DLC1 Rho GTPase activating protein [Source:HGNC Symbol;Acc:HGNC:2897]
267	AMFR	autocrine motility factor receptor [Source:HGNC Symbol;Acc:HGNC:463]
151987	PPP4R2	protein phosphatase 4 regulatory subunit 2 [Source:HGNC Symbol;Acc:HGNC:18296]
134492	NUDCD2	NudC domain containing 2 [Source:HGNC Symbol;Acc:HGNC:30535]
257313	UTS2B	urotensin 2B [Source:HGNC Symbol;Acc:HGNC:30894]
10670	RRAGA	Ras related GTP binding A [Source:HGNC Symbol;Acc:HGNC:16963]
10915	TCERG1	transcription elongation regulator 1 [Source:HGNC Symbol;Acc:HGNC:15630]
1144	CHRND	cholinergic receptor nicotinic delta subunit [Source:HGNC Symbol;Acc:HGNC:1965]
150678	COPS9	COP9 signalosome subunit 9 [Source:HGNC Symbol;Acc:HGNC:21314]
152559	PAQR3	progestin and adipoQ receptor family member 3 [Source:HGNC Symbol;Acc:HGNC:30130]
153769	SH3RF2	SH3 domain containing ring finger 2 [Source:HGNC Symbol;Acc:HGNC:26299]
251	ALPG	alkaline phosphatase, germ cell [Source:HGNC Symbol;Acc:HGNC:441]
2637	GBX2	gastrulation brain homeobox 2 [Source:HGNC Symbol;Acc:HGNC:4186]
267002	PGBD2	piggyBac transposable element derived 2 [Source:HGNC Symbol;Acc:HGNC:19399]
2817	GPC1	glypican 1 [Source:HGNC Symbol;Acc:HGNC:4449]
283489	CHAMP1	chromosome alignment maintaining phosphoprotein 1 [Source:HGNC Symbol;Acc:HGNC:20311]
3015	H2AZ1	H2A.Z variant histone 1 [Source:HGNC Symbol;Acc:HGNC:4741]
3630	INS	insulin [Source:HGNC Symbol;Acc:HGNC:6081]
3665	IRF7	interferon regulatory factor 7 [Source:HGNC Symbol;Acc:HGNC:6122]
389084	SNORC	secondary ossification center associated regulator of chondrocyte maturation [Source:HGNC Symbol;Acc:HGNC:33763]
51281	ANKMY1	ankyrin repeat and MYND domain containing 1 [Source:HGNC Symbol;Acc:HGNC:20987]
5286	PIK3C2A	phosphatidylinositol-4-phosphate 3-kinase catalytic subunit type 2 alpha [Source:HGNC Symbol;Acc:HGNC:8971]
53841	CDHR5	cadherin related family member 5 [Source:HGNC Symbol;Acc:HGNC:7521]
55227	LRRC1	leucine rich repeat containing 1 [Source:HGNC Symbol;Acc:HGNC:14307]
55608	ANKRD10	ankyrin repeat domain 10 [Source:HGNC Symbol;Acc:HGNC:20265]
666	BOK	BCL2 family apoptosis regulator BOK [Source:HGNC Symbol;Acc:HGNC:1087]
79751	SLC25A22	solute carrier family 25 member 22 [Source:HGNC Symbol;Acc:HGNC:19954]
79894	ZNF672	zinc finger protein 672 [Source:HGNC Symbol;Acc:HGNC:26179]
80851	SH3BP5L	SH3 binding domain protein 5 like [Source:HGNC Symbol;Acc:HGNC:29360]
80895	ILKAP	ILK associated serine/threonine phosphatase [Source:HGNC Symbol;Acc:HGNC:15566]
9759	HDAC4	histone deacetylase 4 [Source:HGNC Symbol;Acc:HGNC:14063]
9855	FARP2	FERM, ARH/RhoGEF and pleckstrin domain protein 2 [Source:HGNC Symbol;Acc:HGNC:16460]

## Sheet: Figure 3D
Overlap Results
Collection(s):	C1
# overlaps shown:	7
# genesets in collections:	278
# genes in comparison (n):	492
# genes in universe (N):	40312
Gene Set Name	# Genes in Gene Set (K)	Description	# Genes in Overlap (k)	k/K	p-value	FDR q-value
chr1p13	205	Ensembl 103 genes in cytogenetic band chr1p13	21	0.1024	1.3e-13	3.6e-11
chr12q13	407	Ensembl 103 genes in cytogenetic band chr12q13	22	0.0541	8.56e-09	1.19e-06
chr6q13	56	Ensembl 103 genes in cytogenetic band chr6q13	7	0.125	5.35e-06	0.000496
chr1p34	275	Ensembl 103 genes in cytogenetic band chr1p34	14	0.0509	8.69e-06	0.000604
chr1p35	130	Ensembl 103 genes in cytogenetic band chr1p35	9	0.0692	3.34e-05	0.00186
chr2q11	146	Ensembl 103 genes in cytogenetic band chr2q11	8	0.0548	0.000451	0.0209
chr1p22	129	Ensembl 103 genes in cytogenetic band chr1p22	7	0.0543	0.00108	0.0427
Gene/Gene Set Overlap Matrix
Entrez Gene Id	Gene Symbol	Gene Description	chr1p13	chr12q13	chr6q13	chr1p34	chr1p35	chr2q11	chr1p22
11218	DDX20	DEAD-box helicase 20 [Source:HGNC Symbol;Acc:HGNC:2743]	chr1p13
127002	ATXN7L2	ataxin 7 like 2 [Source:HGNC Symbol;Acc:HGNC:28713]	chr1p13
128344	PIFO	primary cilia formation [Source:HGNC Symbol;Acc:HGNC:27009]	chr1p13
128346	C1orf162	chromosome 1 open reading frame 162 [Source:HGNC Symbol;Acc:HGNC:28344]	chr1p13
1435	CSF1	colony stimulating factor 1 [Source:HGNC Symbol;Acc:HGNC:2432]	chr1p13
260425	MAGI3	membrane associated guanylate kinase, WW and PDZ domain containing 3 [Source:HGNC Symbol;Acc:HGNC:29647]	chr1p13
27159	CHIA	chitinase acidic [Source:HGNC Symbol;Acc:HGNC:17432]	chr1p13
284612	SYPL2	synaptophysin like 2 [Source:HGNC Symbol;Acc:HGNC:27638]	chr1p13
2946	GSTM2	glutathione S-transferase mu 2 [Source:HGNC Symbol;Acc:HGNC:4634]	chr1p13
2949	GSTM5	glutathione S-transferase mu 5 [Source:HGNC Symbol;Acc:HGNC:4637]	chr1p13
3321	IGSF3	immunoglobulin superfamily member 3 [Source:HGNC Symbol;Acc:HGNC:5950]	chr1p13
3744	KCNA10	potassium voltage-gated channel subfamily A member 10 [Source:HGNC Symbol;Acc:HGNC:6219]	chr1p13
389	RHOC	ras homolog family member C [Source:HGNC Symbol;Acc:HGNC:669]	chr1p13
4803	NGF	nerve growth factor [Source:HGNC Symbol;Acc:HGNC:7808]	chr1p13
515	ATP5PB	ATP synthase peripheral stalk-membrane subunit b [Source:HGNC Symbol;Acc:HGNC:840]	chr1p13
55356	SLC22A15	solute carrier family 22 member 15 [Source:HGNC Symbol;Acc:HGNC:20301]	chr1p13
55924	INKA2	inka box actin regulator 2 [Source:HGNC Symbol;Acc:HGNC:28045]	chr1p13
79574	EPS8L3	EPS8 like 3 [Source:HGNC Symbol;Acc:HGNC:21297]	chr1p13
829	CAPZA1	capping actin protein of muscle Z-line subunit alpha 1 [Source:HGNC Symbol;Acc:HGNC:1488]	chr1p13
9398	CD101	CD101 molecule [Source:HGNC Symbol;Acc:HGNC:5949]	chr1p13
963	CD53	CD53 molecule [Source:HGNC Symbol;Acc:HGNC:1686]	chr1p13
11226	GALNT6	polypeptide N-acetylgalactosaminyltransferase 6 [Source:HGNC Symbol;Acc:HGNC:4128]		chr12q13
118430	MUCL1	mucin like 1 [Source:HGNC Symbol;Acc:HGNC:30588]		chr12q13
121274	ZNF641	zinc finger protein 641 [Source:HGNC Symbol;Acc:HGNC:31834]		chr12q13
196374	KRT78	keratin 78 [Source:HGNC Symbol;Acc:HGNC:28926]		chr12q13
196403	DTX3	deltex E3 ubiquitin ligase 3 [Source:HGNC Symbol;Acc:HGNC:24457]		chr12q13
23306	NEMP1	nuclear envelope integral membrane protein 1 [Source:HGNC Symbol;Acc:HGNC:29001]		chr12q13
283471	TMPRSS12	transmembrane serine protease 12 [Source:HGNC Symbol;Acc:HGNC:28779]		chr12q13
319	APOF	apolipoprotein F [Source:HGNC Symbol;Acc:HGNC:615]		chr12q13
3228	HOXC12	homeobox C12 [Source:HGNC Symbol;Acc:HGNC:5124]		chr12q13
338785	KRT79	keratin 79 [Source:HGNC Symbol;Acc:HGNC:28930]		chr12q13
341567	H1-7	H1.7 linker histone [Source:HGNC Symbol;Acc:HGNC:24893]		chr12q13
3678	ITGA5	integrin subunit alpha 5 [Source:HGNC Symbol;Acc:HGNC:6141]		chr12q13
3679	ITGA7	integrin subunit alpha 7 [Source:HGNC Symbol;Acc:HGNC:6143]		chr12q13
3848	KRT1	keratin 1 [Source:HGNC Symbol;Acc:HGNC:6412]		chr12q13
3875	KRT18	keratin 18 [Source:HGNC Symbol;Acc:HGNC:6430]		chr12q13
51380	CSAD	cysteine sulfinic acid decarboxylase [Source:HGNC Symbol;Acc:HGNC:18966]		chr12q13
5213	PFKM	phosphofructokinase, muscle [Source:HGNC Symbol;Acc:HGNC:8877]		chr12q13
64375	IKZF4	IKAROS family zinc finger 4 [Source:HGNC Symbol;Acc:HGNC:13179]		chr12q13
6490	PMEL	premelanosome protein [Source:HGNC Symbol;Acc:HGNC:10880]		chr12q13
6821	SUOX	sulfite oxidase [Source:HGNC Symbol;Acc:HGNC:11460]		chr12q13
84987	COX14	cytochrome c oxidase assembly factor COX14 [Source:HGNC Symbol;Acc:HGNC:28216]		chr12q13
9498	SLC4A8	solute carrier family 4 member 8 [Source:HGNC Symbol;Acc:HGNC:11034]		chr12q13
115004	CGAS	cyclic GMP-AMP synthase [Source:HGNC Symbol;Acc:HGNC:21367]			chr6q13
1297	COL9A1	collagen type IX alpha 1 chain [Source:HGNC Symbol;Acc:HGNC:2217]			chr6q13
1310	COL19A1	collagen type XIX alpha 1 chain [Source:HGNC Symbol;Acc:HGNC:2196]			chr6q13
441161	OOEP	oocyte expressed protein [Source:HGNC Symbol;Acc:HGNC:21382]			chr6q13
55510	DDX43	DEAD-box helicase 43 [Source:HGNC Symbol;Acc:HGNC:18677]			chr6q13
60682	SMAP1	small ArfGAP 1 [Source:HGNC Symbol;Acc:HGNC:19651]			chr6q13
80759	KHDC1	KH domain containing 1 [Source:HGNC Symbol;Acc:HGNC:21366]			chr6q13
127391	TMCO2	transmembrane and coiled-coil domains 2 [Source:HGNC Symbol;Acc:HGNC:23312]				chr1p34
127703	C1orf216	chromosome 1 open reading frame 216 [Source:HGNC Symbol;Acc:HGNC:26800]				chr1p34
128209	KLF17	Kruppel like factor 17 [Source:HGNC Symbol;Acc:HGNC:18830]				chr1p34
192670	AGO4	argonaute RISC component 4 [Source:HGNC Symbol;Acc:HGNC:18424]				chr1p34
27095	TRAPPC3	trafficking protein particle complex 3 [Source:HGNC Symbol;Acc:HGNC:19942]				chr1p34
59269	HIVEP3	HIVEP zinc finger 3 [Source:HGNC Symbol;Acc:HGNC:13561]				chr1p34
60313	GPBP1L1	GC-rich promoter binding protein 1 like 1 [Source:HGNC Symbol;Acc:HGNC:28843]				chr1p34
79078	C1orf50	chromosome 1 open reading frame 50 [Source:HGNC Symbol;Acc:HGNC:28795]				chr1p34
79932	KIAA0319L	KIAA0319 like [Source:HGNC Symbol;Acc:HGNC:30071]				chr1p34
84217	ZMYND12	zinc finger MYND-type containing 12 [Source:HGNC Symbol;Acc:HGNC:21192]				chr1p34
84879	MFSD2A	major facilitator superfamily domain containing 2A [Source:HGNC Symbol;Acc:HGNC:25897]				chr1p34
84967	LSM 10.00	LSM10, U7 small nuclear RNA associated [Source:HGNC Symbol;Acc:HGNC:17562]				chr1p34
9048	ARTN	artemin [Source:HGNC Symbol;Acc:HGNC:727]				chr1p34
9783	RIMS3	regulating synaptic membrane exocytosis 3 [Source:HGNC Symbol;Acc:HGNC:21292]				chr1p34
1104	RCC1	regulator of chromosome condensation 1 [Source:HGNC Symbol;Acc:HGNC:1913]					chr1p35
127540	HMGB4	high mobility group box 4 [Source:HGNC Symbol;Acc:HGNC:24954]					chr1p35
149076	ZNF362	zinc finger protein 362 [Source:HGNC Symbol;Acc:HGNC:18079]					chr1p35
252995	FNDC5	fibronectin type III domain containing 5 [Source:HGNC Symbol;Acc:HGNC:20240]					chr1p35
51538	ZCCHC17	zinc finger CCHC-type containing 17 [Source:HGNC Symbol;Acc:HGNC:30246]					chr1p35
55108	BSDC1	BSD domain containing 1 [Source:HGNC Symbol;Acc:HGNC:25501]					chr1p35
6883	TAF12	TATA-box binding protein associated factor 12 [Source:HGNC Symbol;Acc:HGNC:11545]					chr1p35
8565	YARS1	tyrosyl-tRNA synthetase 1 [Source:HGNC Symbol;Acc:HGNC:12840]					chr1p35
8668	EIF3I	eukaryotic translation initiation factor 3 subunit I [Source:HGNC Symbol;Acc:HGNC:3272]					chr1p35
10190	TXNDC9	thioredoxin domain containing 9 [Source:HGNC Symbol;Acc:HGNC:24110]						chr2q11
1261	CNGA3	cyclic nucleotide gated channel subunit alpha 3 [Source:HGNC Symbol;Acc:HGNC:2150]						chr2q11
150771	ITPRIPL1	ITPRIP like 1 [Source:HGNC Symbol;Acc:HGNC:29371]						chr2q11
200403	VWA3B	von Willebrand factor A domain containing 3B [Source:HGNC Symbol;Acc:HGNC:28385]						chr2q11
431705	ASTL	astacin like metalloendopeptidase [Source:HGNC Symbol;Acc:HGNC:31704]						chr2q11
51263	MRPL30	mitochondrial ribosomal protein L30 [Source:HGNC Symbol;Acc:HGNC:14036]						chr2q11
7535	ZAP70	zeta chain of T cell receptor associated protein kinase 70 [Source:HGNC Symbol;Acc:HGNC:12858]						chr2q11
79031	PDCL3	phosducin like 3 [Source:HGNC Symbol;Acc:HGNC:28860]						chr2q11
163351	GBP6	guanylate binding protein family member 6 [Source:HGNC Symbol;Acc:HGNC:25395]							chr1p22
23507	LRRC8B	leucine rich repeat containing 8 VRAC subunit B [Source:HGNC Symbol;Acc:HGNC:30692]							chr1p22
24	ABCA4	ATP binding cassette subfamily A member 4 [Source:HGNC Symbol;Acc:HGNC:34]							chr1p22
2672	GFI1	growth factor independent 1 transcriptional repressor [Source:HGNC Symbol;Acc:HGNC:4237]							chr1p22
388646	GBP7	guanylate binding protein 7 [Source:HGNC Symbol;Acc:HGNC:29606]							chr1p22
54680	ZNHIT6	zinc finger HIT-type containing 6 [Source:HGNC Symbol;Acc:HGNC:26089]							chr1p22
55283	MCOLN3	mucolipin 3 [Source:HGNC Symbol;Acc:HGNC:13358]							chr1p22
1401	CRP	C-reactive protein [Source:HGNC Symbol;Acc:HGNC:2367]
284680	SPATA46	spermatogenesis associated 46 [Source:HGNC Symbol;Acc:HGNC:27648]
336	APOA2	apolipoprotein A2 [Source:HGNC Symbol;Acc:HGNC:601]
3766	KCNJ10	potassium inwardly rectifying channel subfamily J member 10 [Source:HGNC Symbol;Acc:HGNC:6256]
51506	UFC1	ubiquitin-fold modifier conjugating enzyme 1 [Source:HGNC Symbol;Acc:HGNC:26941]
81607	NECTIN4	nectin cell adhesion molecule 4 [Source:HGNC Symbol;Acc:HGNC:19688]
83417	FCRL4	Fc receptor like 4 [Source:HGNC Symbol;Acc:HGNC:18507]
922	CD5L	CD5 molecule like [Source:HGNC Symbol;Acc:HGNC:1690]
9447	AIM2	absent in melanoma 2 [Source:HGNC Symbol;Acc:HGNC:357]
154313	CFAP206	cilia and flagella associated protein 206 [Source:HGNC Symbol;Acc:HGNC:21405]
23595	ORC3	origin recognition complex subunit 3 [Source:HGNC Symbol;Acc:HGNC:8489]
51465	UBE2J1	ubiquitin conjugating enzyme E2 J1 [Source:HGNC Symbol;Acc:HGNC:17598]
84694	GJA10	gap junction protein alpha 10 [Source:HGNC Symbol;Acc:HGNC:16995]
153562	MARVELD2	MARVEL domain containing 2 [Source:HGNC Symbol;Acc:HGNC:26401]
167465	ZNF366	zinc finger protein 366 [Source:HGNC Symbol;Acc:HGNC:18316]
689	BTF3	basic transcription factor 3 [Source:HGNC Symbol;Acc:HGNC:1125]
84135	UTP15	UTP15 small subunit processome component [Source:HGNC Symbol;Acc:HGNC:25758]
84340	GFM2	GTP dependent ribosome recycling factor mitochondrial 2 [Source:HGNC Symbol;Acc:HGNC:29682]
92259	MRPS36	mitochondrial ribosomal protein S36 [Source:HGNC Symbol;Acc:HGNC:16631]
146861	SLC35G3	solute carrier family 35 member G3 [Source:HGNC Symbol;Acc:HGNC:26848]
146862	UNC45B	unc-45 myosin chaperone B [Source:HGNC Symbol;Acc:HGNC:14304]
26574	AATF	apoptosis antagonizing transcription factor [Source:HGNC Symbol;Acc:HGNC:19235]
6354	CCL7	C-C motif chemokine ligand 7 [Source:HGNC Symbol;Acc:HGNC:10634]
6357	CCL13	C-C motif chemokine ligand 13 [Source:HGNC Symbol;Acc:HGNC:10611]
84311	MRPL45	mitochondrial ribosomal protein L45 [Source:HGNC Symbol;Acc:HGNC:16651]
10683	DLL3	delta like canonical Notch ligand 3 [Source:HGNC Symbol;Acc:HGNC:2909]
126147	NTN5	netrin 5 [Source:HGNC Symbol;Acc:HGNC:25208]
1340	COX6B1	cytochrome c oxidase subunit 6B1 [Source:HGNC Symbol;Acc:HGNC:2280]
199731	CADM4	cell adhesion molecule 4 [Source:HGNC Symbol;Acc:HGNC:30825]
26291	FGF21	fibroblast growth factor 21 [Source:HGNC Symbol;Acc:HGNC:3678]
26974	ZNF285	zinc finger protein 285 [Source:HGNC Symbol;Acc:HGNC:13079]
27120	DKKL1	dickkopf like acrosomal protein 1 [Source:HGNC Symbol;Acc:HGNC:16528]
284370	ZNF615	zinc finger protein 615 [Source:HGNC Symbol;Acc:HGNC:24740]
29903	CCDC106	coiled-coil domain containing 106 [Source:HGNC Symbol;Acc:HGNC:30181]
3171	FOXA3	forkhead box A3 [Source:HGNC Symbol;Acc:HGNC:5023]
317703	VN1R4	vomeronasal 1 receptor 4 [Source:HGNC Symbol;Acc:HGNC:19871]
339327	ZNF546	zinc finger protein 546 [Source:HGNC Symbol;Acc:HGNC:28671]
342898	SYCN	syncollin [Source:HGNC Symbol;Acc:HGNC:18442]
388536	ZNF790	zinc finger protein 790 [Source:HGNC Symbol;Acc:HGNC:33114]
390928	ACP7	acid phosphatase 7, tartrate resistant (putative) [Source:HGNC Symbol;Acc:HGNC:33781]
440533	PSG8	pregnancy specific beta-1-glycoprotein 8 [Source:HGNC Symbol;Acc:HGNC:9525]
56915	EXOSC5	exosome component 5 [Source:HGNC Symbol;Acc:HGNC:24662]
57622	LRFN1	leucine rich repeat and fibronectin type III domain containing 1 [Source:HGNC Symbol;Acc:HGNC:29290]
581	BAX	BCL2 associated X, apoptosis regulator [Source:HGNC Symbol;Acc:HGNC:959]
587	BCAT2	branched chain amino acid transaminase 2 [Source:HGNC Symbol;Acc:HGNC:977]
6217	RPS16	ribosomal protein S16 [Source:HGNC Symbol;Acc:HGNC:10396]
8189	SYMPK	symplekin [Source:HGNC Symbol;Acc:HGNC:22935]
84765	ZNF577	zinc finger protein 577 [Source:HGNC Symbol;Acc:HGNC:28673]
90522	YIF1B	Yip1 interacting factor homolog B, membrane trafficking protein [Source:HGNC Symbol;Acc:HGNC:30511]
1600	DAB1	DAB adaptor protein 1 [Source:HGNC Symbol;Acc:HGNC:2661]
199964	TMEM61	transmembrane protein 61 [Source:HGNC Symbol;Acc:HGNC:27296]
200008	CDCP2	CUB domain containing protein 2 [Source:HGNC Symbol;Acc:HGNC:27297]
4898	NRDC	nardilysin convertase [Source:HGNC Symbol;Acc:HGNC:7995]
51361	HOOK1	hook microtubule tethering protein 1 [Source:HGNC Symbol;Acc:HGNC:19884]
731	C8A	complement C8 alpha chain [Source:HGNC Symbol;Acc:HGNC:1352]
200373	CFAP221	cilia and flagella associated protein 221 [Source:HGNC Symbol;Acc:HGNC:33720]
27178	IL37	interleukin 37 [Source:HGNC Symbol;Acc:HGNC:15563]
54520	CCDC93	coiled-coil domain containing 93 [Source:HGNC Symbol;Acc:HGNC:25611]
55339	WDR33	WD repeat domain 33 [Source:HGNC Symbol;Acc:HGNC:25651]
84172	POLR1B	RNA polymerase I subunit B [Source:HGNC Symbol;Acc:HGNC:20454]
8685	MARCO	macrophage receptor with collagenous structure [Source:HGNC Symbol;Acc:HGNC:6895]
254013	ETFBKMT	electron transfer flavoprotein subunit beta lysine methyltransferase [Source:HGNC Symbol;Acc:HGNC:28739]
55196	RESF1	retroelement silencing factor 1 [Source:HGNC Symbol;Acc:HGNC:25559]
83857	TMTC1	transmembrane O-mannosyltransferase targeting cadherins 1 [Source:HGNC Symbol;Acc:HGNC:24099]
9412	MED21	mediator complex subunit 21 [Source:HGNC Symbol;Acc:HGNC:11473]
132946	ARL 9.00	ADP ribosylation factor like GTPase 9 [Source:HGNC Symbol;Acc:HGNC:23592]
132954	PDCL2	phosducin like 2 [Source:HGNC Symbol;Acc:HGNC:29524]
55763	EXOC1	exocyst complex component 1 [Source:HGNC Symbol;Acc:HGNC:30380]
84708	LNX1	ligand of numb-protein X 1 [Source:HGNC Symbol;Acc:HGNC:6657]
148418	SAMD13	sterile alpha motif domain containing 13 [Source:HGNC Symbol;Acc:HGNC:24582]
1491	CTH	cystathionine gamma-lyase [Source:HGNC Symbol;Acc:HGNC:2501]
163782	KANK4	KN motif and ankyrin repeat domains 4 [Source:HGNC Symbol;Acc:HGNC:27263]
5737	PTGFR	prostaglandin F receptor [Source:HGNC Symbol;Acc:HGNC:9600]
58511	DNASE2B	deoxyribonuclease 2 beta [Source:HGNC Symbol;Acc:HGNC:28875]
84251	SGIP1	SH3GL interacting endocytic adaptor 1 [Source:HGNC Symbol;Acc:HGNC:25412]
9077	DIRAS3	DIRAS family GTPase 3 [Source:HGNC Symbol;Acc:HGNC:687]
10500	SEMA6C	semaphorin 6C [Source:HGNC Symbol;Acc:HGNC:10740]
1141	CHRNB2	cholinergic receptor nicotinic beta 2 subunit [Source:HGNC Symbol;Acc:HGNC:1962]
126668	TDRD10	tudor domain containing 10 [Source:HGNC Symbol;Acc:HGNC:25316]
148741	ANKRD35	ankyrin repeat domain 35 [Source:HGNC Symbol;Acc:HGNC:26323]
1893	ECM1	extracellular matrix protein 1 [Source:HGNC Symbol;Acc:HGNC:3153]
353132	LCE1B	late cornified envelope 1B [Source:HGNC Symbol;Acc:HGNC:16611]
353139	LCE2A	late cornified envelope 2A [Source:HGNC Symbol;Acc:HGNC:29469]
51686	OAZ3	ornithine decarboxylase antizyme 3 [Source:HGNC Symbol;Acc:HGNC:8097]
574414	PRR9	proline rich 9 [Source:HGNC Symbol;Acc:HGNC:32057]
57530	CGN	cingulin [Source:HGNC Symbol;Acc:HGNC:17429]
10690	FUT9	fucosyltransferase 9 [Source:HGNC Symbol;Acc:HGNC:4020]
26235	FBXL4	F-box and leucine rich repeat protein 4 [Source:HGNC Symbol;Acc:HGNC:13601]
51805	COQ3	coenzyme Q3, methyltransferase [Source:HGNC Symbol;Acc:HGNC:18175]
10887	PROKR1	prokineticin receptor 1 [Source:HGNC Symbol;Acc:HGNC:4524]
1639	DCTN1	dynactin subunit 1 [Source:HGNC Symbol;Acc:HGNC:2711]
388962	BOLA3	bolA family member 3 [Source:HGNC Symbol;Acc:HGNC:24415]
51002	TPRKB	TP53RK binding protein [Source:HGNC Symbol;Acc:HGNC:24259]
7841	MOGS	mannosyl-oligosaccharide glucosidase [Source:HGNC Symbol;Acc:HGNC:24862]
130132	RFTN2	raftlin family member 2 [Source:HGNC Symbol;Acc:HGNC:26402]
25843	MOB4	MOB family member 4, phocein [Source:HGNC Symbol;Acc:HGNC:17261]
401027	C2orf66	chromosome 2 open reading frame 66 [Source:HGNC Symbol;Acc:HGNC:33809]
4709	NDUFB3	NADH:ubiquinone oxidoreductase subunit B3 [Source:HGNC Symbol;Acc:HGNC:7698]
4999	ORC2	origin recognition complex subunit 2 [Source:HGNC Symbol;Acc:HGNC:8488]
55759	WDR12	WD repeat domain 12 [Source:HGNC Symbol;Acc:HGNC:14098]
1996	ELAVL4	ELAV like RNA binding protein 4 [Source:HGNC Symbol;Acc:HGNC:3315]
2166	FAAH	fatty acid amide hydrolase [Source:HGNC Symbol;Acc:HGNC:3553]
387338	NSUN4	NOP2/Sun RNA methyltransferase 4 [Source:HGNC Symbol;Acc:HGNC:31802]
10485	MIR9-1HG	MIR9-1 host gene [Source:HGNC Symbol;Acc:HGNC:30780]
7818	DAP3	death associated protein 3 [Source:HGNC Symbol;Acc:HGNC:2673]
9673	SLC25A44	solute carrier family 25 member 44 [Source:HGNC Symbol;Acc:HGNC:29036]
11222	MRPL3	mitochondrial ribosomal protein L3 [Source:HGNC Symbol;Acc:HGNC:10379]
51146	A4GNT	alpha-1,4-N-acetylglucosaminyltransferase [Source:HGNC Symbol;Acc:HGNC:17968]
55	ACP3	acid phosphatase 3 [Source:HGNC Symbol;Acc:HGNC:125]
55573	CDV3	CDV3 homolog [Source:HGNC Symbol;Acc:HGNC:26928]
256380	SCML4	Scm polycomb group protein like 4 [Source:HGNC Symbol;Acc:HGNC:21397]
442247	RFPL4B	ret finger protein like 4B [Source:HGNC Symbol;Acc:HGNC:33264]
84154	RPF2	ribosome production factor 2 homolog [Source:HGNC Symbol;Acc:HGNC:20870]
84816	RTN4IP1	reticulon 4 interacting protein 1 [Source:HGNC Symbol;Acc:HGNC:18647]
2960	GTF2E1	general transcription factor IIE subunit 1 [Source:HGNC Symbol;Acc:HGNC:4650]
4345	CD200	CD200 molecule [Source:HGNC Symbol;Acc:HGNC:7203]
941	CD80	CD80 molecule [Source:HGNC Symbol;Acc:HGNC:1700]
942	CD86	CD86 molecule [Source:HGNC Symbol;Acc:HGNC:1705]
9657	IQCB1	IQ motif containing B1 [Source:HGNC Symbol;Acc:HGNC:28949]
10044	SH2D3C	SH2 domain containing 3C [Source:HGNC Symbol;Acc:HGNC:16884]
1025	CDK9	cyclin dependent kinase 9 [Source:HGNC Symbol;Acc:HGNC:1780]
26995	TRUB2	TruB pseudouridine synthase family member 2 [Source:HGNC Symbol;Acc:HGNC:17170]
445	ASS1	argininosuccinate synthase 1 [Source:HGNC Symbol;Acc:HGNC:758]
51490	SPOUT1	SPOUT domain containing methyltransferase 1 [Source:HGNC Symbol;Acc:HGNC:26933]
7270	TTF1	transcription termination factor 1 [Source:HGNC Symbol;Acc:HGNC:12397]
9442	MED27	mediator complex subunit 27 [Source:HGNC Symbol;Acc:HGNC:2377]
101928601	MEI4	meiotic double-stranded break formation protein 4 [Source:HGNC Symbol;Acc:HGNC:43638]
1081	CGA	glycoprotein hormones, alpha polypeptide [Source:HGNC Symbol;Acc:HGNC:1885]
7272	TTK	TTK protein kinase [Source:HGNC Symbol;Acc:HGNC:12401]
219970	GLYATL2	glycine-N-acyltransferase like 2 [Source:HGNC Symbol;Acc:HGNC:24178]
387601	SLC22A25	solute carrier family 22 member 25 [Source:HGNC Symbol;Acc:HGNC:32935]
5920	PLAAT4	phospholipase A and acyltransferase 4 [Source:HGNC Symbol;Acc:HGNC:9869]
64232	MS4A5	membrane spanning 4-domains A5 [Source:HGNC Symbol;Acc:HGNC:13374]
9066	SYT7	synaptotagmin 7 [Source:HGNC Symbol;Acc:HGNC:11514]
9246	UBE2L6	ubiquitin conjugating enzyme E2 L6 [Source:HGNC Symbol;Acc:HGNC:12490]
932	MS4A3	membrane spanning 4-domains A3 [Source:HGNC Symbol;Acc:HGNC:7317]
10352	WARS2	tryptophanyl tRNA synthetase 2, mitochondrial [Source:HGNC Symbol;Acc:HGNC:12730]
10885	WDR3	WD repeat domain 3 [Source:HGNC Symbol;Acc:HGNC:12755]
22875	ENPP4	ectonucleotide pyrophosphatase/phosphodiesterase 4 [Source:HGNC Symbol;Acc:HGNC:3359]
27154	BRPF3	bromodomain and PHD finger containing 3 [Source:HGNC Symbol;Acc:HGNC:14256]
3109	HLA-DMB	major histocompatibility complex, class II, DM beta [Source:HGNC Symbol;Acc:HGNC:4935]
51069	MRPL2	mitochondrial ribosomal protein L2 [Source:HGNC Symbol;Acc:HGNC:14056]
578	BAK1	BCL2 antagonist/killer 1 [Source:HGNC Symbol;Acc:HGNC:949]
6499	SKIV2L	Ski2 like RNA helicase [Source:HGNC Symbol;Acc:HGNC:10898]
705	BYSL	bystin like [Source:HGNC Symbol;Acc:HGNC:1157]
80739	MPIG6B	megakaryocyte and platelet inhibitory receptor G6b [Source:HGNC Symbol;Acc:HGNC:13937]
9477	MED20	mediator complex subunit 20 [Source:HGNC Symbol;Acc:HGNC:16840]
10393	ANAPC10	anaphase promoting complex subunit 10 [Source:HGNC Symbol;Acc:HGNC:24077]
11157	LSM 6.00	LSM6 homolog, U6 small nuclear RNA and mRNA degradation associated [Source:HGNC Symbol;Acc:HGNC:17017]
5188	GATB	glutamyl-tRNA amidotransferase subunit B [Source:HGNC Symbol;Acc:HGNC:8849]
6059	ABCE1	ATP binding cassette subfamily E member 1 [Source:HGNC Symbol;Acc:HGNC:69]
374786	EFCAB5	EF-hand calcium binding domain 5 [Source:HGNC Symbol;Acc:HGNC:24801]
55813	UTP6	UTP6 small subunit processome component [Source:HGNC Symbol;Acc:HGNC:18279]
6532	SLC6A4	solute carrier family 6 member 4 [Source:HGNC Symbol;Acc:HGNC:11050]
79915	ATAD5	ATPase family AAA domain containing 5 [Source:HGNC Symbol;Acc:HGNC:25752]
440	ASNS	asparagine synthetase (glutamine-hydrolyzing) [Source:HGNC Symbol;Acc:HGNC:753]
4951	OCM2	oncomodulin 2 [Source:HGNC Symbol;Acc:HGNC:34396]
54809	SAMD9	sterile alpha motif domain containing 9 [Source:HGNC Symbol;Acc:HGNC:1348]
85865	GTPBP10	GTP binding protein 10 [Source:HGNC Symbol;Acc:HGNC:25106]
1368	CPM	carboxypeptidase M [Source:HGNC Symbol;Acc:HGNC:2311]
5908	RAP1B	RAP1B, member of RAS oncogene family [Source:HGNC Symbol;Acc:HGNC:9857]
220988	HNRNPA3	heterogeneous nuclear ribonucleoprotein A3 [Source:HGNC Symbol;Acc:HGNC:24941]
254042	METAP1D	methionyl aminopeptidase type 1D, mitochondrial [Source:HGNC Symbol;Acc:HGNC:32583]
6741	SSB	small RNA binding exonuclease protection factor La [Source:HGNC Symbol;Acc:HGNC:11316]
9874	TLK1	tousled like kinase 1 [Source:HGNC Symbol;Acc:HGNC:11841]
140683	BPIFA2	BPI fold containing family A member 2 [Source:HGNC Symbol;Acc:HGNC:16203]
6640	SNTA1	syntrophin alpha 1 [Source:HGNC Symbol;Acc:HGNC:11167]
79913	ACTR5	actin related protein 5 [Source:HGNC Symbol;Acc:HGNC:14671]
81572	PDRG1	p53 and DNA damage regulated 1 [Source:HGNC Symbol;Acc:HGNC:16119]
84905	ZNF341	zinc finger protein 341 [Source:HGNC Symbol;Acc:HGNC:15992]
23395	LARS2	leucyl-tRNA synthetase 2, mitochondrial [Source:HGNC Symbol;Acc:HGNC:17095]
339906	PRSS42P	serine protease 42, pseudogene [Source:HGNC Symbol;Acc:HGNC:30716]
51161	C3orf18	chromosome 3 open reading frame 18 [Source:HGNC Symbol;Acc:HGNC:24837]
51246	SHISA5	shisa family member 5 [Source:HGNC Symbol;Acc:HGNC:30376]
646498	C3orf84	chromosome 3 open reading frame 84 [Source:HGNC Symbol;Acc:HGNC:44666]
820	CAMP	cathelicidin antimicrobial peptide [Source:HGNC Symbol;Acc:HGNC:1472]
285671	RNF180	ring finger protein 180 [Source:HGNC Symbol;Acc:HGNC:27752]
401190	RGS7BP	regulator of G protein signaling 7 binding protein [Source:HGNC Symbol;Acc:HGNC:23271]
167127	UGT3A2	UDP glycosyltransferase family 3 member A2 [Source:HGNC Symbol;Acc:HGNC:27266]
6897	TARS1	threonyl-tRNA synthetase 1 [Source:HGNC Symbol;Acc:HGNC:11572]
730	C7	complement C7 [Source:HGNC Symbol;Acc:HGNC:1346]
152926	PPM1K	protein phosphatase, Mg2+/Mn2+ dependent 1K [Source:HGNC Symbol;Acc:HGNC:25415]
1758	DMP1	dentin matrix acidic phosphoprotein 1 [Source:HGNC Symbol;Acc:HGNC:2932]
29088	MRPL15	mitochondrial ribosomal protein L15 [Source:HGNC Symbol;Acc:HGNC:14054]
79645	EFCAB1	EF-hand calcium binding domain 1 [Source:HGNC Symbol;Acc:HGNC:25678]
131076	CCDC58	coiled-coil domain containing 58 [Source:HGNC Symbol;Acc:HGNC:31136]
165721	DNAJB8	DnaJ heat shock protein family (Hsp40) member B8 [Source:HGNC Symbol;Acc:HGNC:23699]
57461	ISY1	ISY1 splicing factor homolog [Source:HGNC Symbol;Acc:HGNC:29201]
4544	MTNR1B	melatonin receptor 1B [Source:HGNC Symbol;Acc:HGNC:7464]
51501	HIKESHI	heat shock protein nuclear import factor hikeshi [Source:HGNC Symbol;Acc:HGNC:26938]
79731	NARS2	asparaginyl-tRNA synthetase 2, mitochondrial [Source:HGNC Symbol;Acc:HGNC:26274]
400950	C2orf91	chromosome 2 putative open reading frame 91 [Source:HGNC Symbol;Acc:HGNC:42966]
9655	SOCS5	suppressor of cytokine signaling 5 [Source:HGNC Symbol;Acc:HGNC:16852]
11145	PLAAT3	phospholipase A and acyltransferase 3 [Source:HGNC Symbol;Acc:HGNC:17825]
283248	RCOR2	REST corepressor 2 [Source:HGNC Symbol;Acc:HGNC:27455]
374407	DNAJB13	DnaJ heat shock protein family (Hsp40) member B13 [Source:HGNC Symbol;Acc:HGNC:30718]
402	ARL 2.00	ADP ribosylation factor like GTPase 2 [Source:HGNC Symbol;Acc:HGNC:693]
4723	NDUFV1	NADH:ubiquinone oxidoreductase core subunit V1 [Source:HGNC Symbol;Acc:HGNC:7716]
55867	SLC22A11	solute carrier family 22 member 11 [Source:HGNC Symbol;Acc:HGNC:18120]
84285	EIF1AD	eukaryotic translation initiation factor 1A domain containing [Source:HGNC Symbol;Acc:HGNC:28147]
10640	EXOC5	exocyst complex component 5 [Source:HGNC Symbol;Acc:HGNC:10696]
93487	MAPK1IP1L	mitogen-activated protein kinase 1 interacting protein 1 like [Source:HGNC Symbol;Acc:HGNC:19840]
23179	RGL1	ral guanine nucleotide dissociation stimulator like 1 [Source:HGNC Symbol;Acc:HGNC:30281]
462	SERPINC1	serpin family C member 1 [Source:HGNC Symbol;Acc:HGNC:775]
91687	CENPL	centromere protein L [Source:HGNC Symbol;Acc:HGNC:17879]
2692	GHRHR	growth hormone releasing hormone receptor [Source:HGNC Symbol;Acc:HGNC:4266]
5683	PSMA2	proteasome 20S subunit alpha 2 [Source:HGNC Symbol;Acc:HGNC:9531]
64983	MRPL32	mitochondrial ribosomal protein L32 [Source:HGNC Symbol;Acc:HGNC:14035]
55250	ELP2	elongator acetyltransferase complex subunit 2 [Source:HGNC Symbol;Acc:HGNC:18248]
6860	SYT4	synaptotagmin 4 [Source:HGNC Symbol;Acc:HGNC:11512]
10645	CAMKK2	calcium/calmodulin dependent protein kinase kinase 2 [Source:HGNC Symbol;Acc:HGNC:1470]
1610	DAO	D-amino acid oxidase [Source:HGNC Symbol;Acc:HGNC:2671]
2967	GTF2H3	general transcription factor IIH subunit 3 [Source:HGNC Symbol;Acc:HGNC:4657]
5985	RFC5	replication factor C subunit 5 [Source:HGNC Symbol;Acc:HGNC:9973]
643246	MAP1LC3B2	microtubule associated protein 1 light chain 3 beta 2 [Source:HGNC Symbol;Acc:HGNC:34390]
79039	DDX54	DEAD-box helicase 54 [Source:HGNC Symbol;Acc:HGNC:20084]
27019	DNAI1	dynein axonemal intermediate chain 1 [Source:HGNC Symbol;Acc:HGNC:2954]
51754	TMEM8B	transmembrane protein 8B [Source:HGNC Symbol;Acc:HGNC:21427]
692094	MSMP	microseminoprotein, prostate associated [Source:HGNC Symbol;Acc:HGNC:29663]
10469	TIMM44	translocase of inner mitochondrial membrane 44 [Source:HGNC Symbol;Acc:HGNC:17316]
115861	NXNL1	nucleoredoxin like 1 [Source:HGNC Symbol;Acc:HGNC:25179]
1820	ARID3A	AT-rich interaction domain 3A [Source:HGNC Symbol;Acc:HGNC:3031]
1994	ELAVL1	ELAV like RNA binding protein 1 [Source:HGNC Symbol;Acc:HGNC:3312]
23770	FKBP8	FKBP prolyl isomerase 8 [Source:HGNC Symbol;Acc:HGNC:3724]
2962	GTF2F1	general transcription factor IIF subunit 1 [Source:HGNC Symbol;Acc:HGNC:4652]
374291	NDUFS7	NADH:ubiquinone oxidoreductase core subunit S7 [Source:HGNC Symbol;Acc:HGNC:7714]
388512	CLEC17A	C-type lectin domain containing 17A [Source:HGNC Symbol;Acc:HGNC:34520]
54	ACP5	acid phosphatase 5, tartrate resistant [Source:HGNC Symbol;Acc:HGNC:124]
56342	PPAN	peter pan homolog [Source:HGNC Symbol;Acc:HGNC:9227]
84527	ZNF559	zinc finger protein 559 [Source:HGNC Symbol;Acc:HGNC:28197]
201965	RWDD4	RWD domain containing 4 [Source:HGNC Symbol;Acc:HGNC:23750]
60684	TRAPPC11	trafficking protein particle complex 11 [Source:HGNC Symbol;Acc:HGNC:25751]
10203	CALCRL	calcitonin receptor like receptor [Source:HGNC Symbol;Acc:HGNC:16709]
6775	STAT4	signal transducer and activator of transcription 4 [Source:HGNC Symbol;Acc:HGNC:11365]
145226	RDH12	retinol dehydrogenase 12 [Source:HGNC Symbol;Acc:HGNC:19977]
8892	EIF2B2	eukaryotic translation initiation factor 2B subunit beta [Source:HGNC Symbol;Acc:HGNC:3258]
91750	LIN52	lin-52 DREAM MuvB core complex component [Source:HGNC Symbol;Acc:HGNC:19856]
132203	SNTN	sentan, cilia apical structure protein [Source:HGNC Symbol;Acc:HGNC:33706]
200845	KCTD6	potassium channel tetramerization domain containing 6 [Source:HGNC Symbol;Acc:HGNC:22235]
11128	POLR3A	RNA polymerase III subunit A [Source:HGNC Symbol;Acc:HGNC:30074]
338599	DUSP29	dual specificity phosphatase 29 [Source:HGNC Symbol;Acc:HGNC:23481]
5464	PPA1	inorganic pyrophosphatase 1 [Source:HGNC Symbol;Acc:HGNC:9226]
2168	FABP1	fatty acid binding protein 1 [Source:HGNC Symbol;Acc:HGNC:3555]
51652	CHMP3	charged multivesicular body protein 3 [Source:HGNC Symbol;Acc:HGNC:29865]
55258	THNSL2	threonine synthase like 2 [Source:HGNC Symbol;Acc:HGNC:25602]
26024	PTCD1	pentatricopeptide repeat domain 1 [Source:HGNC Symbol;Acc:HGNC:22198]
5001	ORC5	origin recognition complex subunit 5 [Source:HGNC Symbol;Acc:HGNC:8491]
51024	FIS1	fission, mitochondrial 1 [Source:HGNC Symbol;Acc:HGNC:21689]
219402	MTIF3	mitochondrial translational initiation factor 3 [Source:HGNC Symbol;Acc:HGNC:29788]
51082	POLR1D	RNA polymerase I and III subunit D [Source:HGNC Symbol;Acc:HGNC:20422]
55835	CENPJ	centromere protein J [Source:HGNC Symbol;Acc:HGNC:17272]
10404	CPQ	carboxypeptidase Q [Source:HGNC Symbol;Acc:HGNC:16910]
203111	ERICH5	glutamate rich 5 [Source:HGNC Symbol;Acc:HGNC:26823]
23428	SLC7A8	solute carrier family 7 member 8 [Source:HGNC Symbol;Acc:HGNC:11066]
25983	NGDN	neuroguidin [Source:HGNC Symbol;Acc:HGNC:20271]
493901	RNASE12	ribonuclease A family member 12 (inactive) [Source:HGNC Symbol;Acc:HGNC:24211]
51310	SLC22A17	solute carrier family 22 member 17 [Source:HGNC Symbol;Acc:HGNC:23095]
29079	MED4	mediator complex subunit 4 [Source:HGNC Symbol;Acc:HGNC:17903]
440138	ALG11	ALG11 alpha-1,2-mannosyltransferase [Source:HGNC Symbol;Acc:HGNC:32456]
94240	EPSTI1	epithelial stromal interaction 1 [Source:HGNC Symbol;Acc:HGNC:16465]
643664	SLC35G6	solute carrier family 35 member G6 [Source:HGNC Symbol;Acc:HGNC:31351]
7531	YWHAE	tyrosine 3-monooxygenase/tryptophan 5-monooxygenase activation protein epsilon [Source:HGNC Symbol;Acc:HGNC:12851]
79003	MIS12	MIS12 kinetochore complex component [Source:HGNC Symbol;Acc:HGNC:24967]
9212	AURKB	aurora kinase B [Source:HGNC Symbol;Acc:HGNC:11390]
1582	CYP8B1	cytochrome P450 family 8 subfamily B member 1 [Source:HGNC Symbol;Acc:HGNC:2653]
6336	SCN10A	sodium voltage-gated channel alpha subunit 10 [Source:HGNC Symbol;Acc:HGNC:10582]
100381270	ZBED6	zinc finger BED-type containing 6 [Source:HGNC Symbol;Acc:HGNC:33273]
54900	LAX1	lymphocyte transmembrane adaptor 1 [Source:HGNC Symbol;Acc:HGNC:26005]
5549	PRELP	proline and arginine rich end leucine rich repeat protein [Source:HGNC Symbol;Acc:HGNC:9357]
25984	KRT23	keratin 23 [Source:HGNC Symbol;Acc:HGNC:6438]
28958	COA3	cytochrome c oxidase assembly factor 3 [Source:HGNC Symbol;Acc:HGNC:24990]
3860	KRT13	keratin 13 [Source:HGNC Symbol;Acc:HGNC:6415]
3868	KRT16	keratin 16 [Source:HGNC Symbol;Acc:HGNC:6423]
7343	UBTF	upstream binding transcription factor [Source:HGNC Symbol;Acc:HGNC:12511]
344658	SAMD7	sterile alpha motif domain containing 7 [Source:HGNC Symbol;Acc:HGNC:25394]
4711	NDUFB5	NADH:ubiquinone oxidoreductase subunit B5 [Source:HGNC Symbol;Acc:HGNC:7700]
4677	NARS1	asparaginyl-tRNA synthetase 1 [Source:HGNC Symbol;Acc:HGNC:7643]
498	ATP5F1A	ATP synthase F1 subunit alpha [Source:HGNC Symbol;Acc:HGNC:823]
54853	WDR55	WD repeat domain 55 [Source:HGNC Symbol;Acc:HGNC:25971]
6500	SKP1	S-phase kinase associated protein 1 [Source:HGNC Symbol;Acc:HGNC:10899]
83884	SLC25A2	solute carrier family 25 member 2 [Source:HGNC Symbol;Acc:HGNC:22921]
9453	GGPS1	geranylgeranyl diphosphate synthase 1 [Source:HGNC Symbol;Acc:HGNC:4249]
9816	URB2	URB2 ribosome biogenesis homolog [Source:HGNC Symbol;Acc:HGNC:28967]
2046	EPHA8	EPH receptor A8 [Source:HGNC Symbol;Acc:HGNC:3391]
401944	LDLRAD2	low density lipoprotein receptor class A domain containing 2 [Source:HGNC Symbol;Acc:HGNC:32071]
50651	SLC45A1	solute carrier family 45 member 1 [Source:HGNC Symbol;Acc:HGNC:17939]
55052	MRPL20	mitochondrial ribosomal protein L20 [Source:HGNC Symbol;Acc:HGNC:14478]
6920	TCEA3	transcription elongation factor A3 [Source:HGNC Symbol;Acc:HGNC:11615]
84196	USP48	ubiquitin specific peptidase 48 [Source:HGNC Symbol;Acc:HGNC:18533]
2006	ELN	elastin [Source:HGNC Symbol;Acc:HGNC:3327]
83698	CALN1	calneuron 1 [Source:HGNC Symbol;Acc:HGNC:13248]
391253	SPINT4	serine peptidase inhibitor, Kunitz type 4 [Source:HGNC Symbol;Acc:HGNC:16130]
51507	RTF2	replication termination factor 2 [Source:HGNC Symbol;Acc:HGNC:15890]
57468	SLC12A5	solute carrier family 12 member 5 [Source:HGNC Symbol;Acc:HGNC:13818]
10476	ATP5PD	ATP synthase peripheral stalk subunit d [Source:HGNC Symbol;Acc:HGNC:845]
3396	MRPL58	mitochondrial ribosomal protein L58 [Source:HGNC Symbol;Acc:HGNC:5359]
2597	GAPDH	glyceraldehyde-3-phosphate dehydrogenase [Source:HGNC Symbol;Acc:HGNC:4141]
4704	NDUFA9	NADH:ubiquinone oxidoreductase subunit A9 [Source:HGNC Symbol;Acc:HGNC:7693]
5700	PSMC1	proteasome 26S subunit, ATPase 1 [Source:HGNC Symbol;Acc:HGNC:9547]
623	BDKRB1	bradykinin receptor B1 [Source:HGNC Symbol;Acc:HGNC:1029]
9556	ATP5MPL	ATP synthase membrane subunit 6.8PL [Source:HGNC Symbol;Acc:HGNC:1188]
26156	RSL1D1	ribosomal L1 domain containing 1 [Source:HGNC Symbol;Acc:HGNC:24534]
7332	UBE2L3	ubiquitin conjugating enzyme E2 L3 [Source:HGNC Symbol;Acc:HGNC:12488]
8243	SMC1A	structural maintenance of chromosomes 1A [Source:HGNC Symbol;Acc:HGNC:11111]
114821	ZBED9	zinc finger BED-type containing 9 [Source:HGNC Symbol;Acc:HGNC:13851]
3681	ITGAD	integrin subunit alpha D [Source:HGNC Symbol;Acc:HGNC:6146]
662	BNIP1	BCL2 interacting protein 1 [Source:HGNC Symbol;Acc:HGNC:1082]
23481	PES 1.00	pescadillo ribosomal biogenesis factor 1 [Source:HGNC Symbol;Acc:HGNC:8848]
4729	NDUFV2	NADH:ubiquinone oxidoreductase core subunit V2 [Source:HGNC Symbol;Acc:HGNC:7717]
27287	VENTX	VENT homeobox [Source:HGNC Symbol;Acc:HGNC:13639]
23164	MPRIP	myosin phosphatase Rho interacting protein [Source:HGNC Symbol;Acc:HGNC:30321]
8789	FBP2	fructose-bisphosphatase 2 [Source:HGNC Symbol;Acc:HGNC:3607]
55753	OGDHL	oxoglutarate dehydrogenase L [Source:HGNC Symbol;Acc:HGNC:25590]
23223	RRP12	ribosomal RNA processing 12 homolog [Source:HGNC Symbol;Acc:HGNC:29100]
51650	MRPS33	mitochondrial ribosomal protein S33 [Source:HGNC Symbol;Acc:HGNC:16634]
9643	MORF4L2	mortality factor 4 like 2 [Source:HGNC Symbol;Acc:HGNC:16849]
7385	UQCRC2	ubiquinol-cytochrome c reductase core protein 2 [Source:HGNC Symbol;Acc:HGNC:12586]
10813	UTP14A	UTP14A small subunit processome component [Source:HGNC Symbol;Acc:HGNC:10665]
347517	RAB41	RAB41, member RAS oncogene family [Source:HGNC Symbol;Acc:HGNC:18293]
51106	TFB1M	transcription factor B1, mitochondrial [Source:HGNC Symbol;Acc:HGNC:17037]
85476	GFM1	G elongation factor mitochondrial 1 [Source:HGNC Symbol;Acc:HGNC:13780]
92856	IMP4	IMP U3 small nucleolar ribonucleoprotein 4 [Source:HGNC Symbol;Acc:HGNC:30856]
8534	CHST1	carbohydrate sulfotransferase 1 [Source:HGNC Symbol;Acc:HGNC:1969]
338773	TMEM119	transmembrane protein 119 [Source:HGNC Symbol;Acc:HGNC:27884]
10113	PREB	prolactin regulatory element binding [Source:HGNC Symbol;Acc:HGNC:9356]
131474	CHCHD4	coiled-coil-helix-coiled-coil-helix domain containing 4 [Source:HGNC Symbol;Acc:HGNC:26467]
5919	RARRES2	retinoic acid receptor responder 2 [Source:HGNC Symbol;Acc:HGNC:9868]
79366	HMGN5	high mobility group nucleosome binding domain 5 [Source:HGNC Symbol;Acc:HGNC:8013]
6228	RPS23	ribosomal protein S23 [Source:HGNC Symbol;Acc:HGNC:10410]
7520	XRCC5	X-ray repair cross complementing 5 [Source:HGNC Symbol;Acc:HGNC:12833]
6328	SCN3A	sodium voltage-gated channel alpha subunit 3 [Source:HGNC Symbol;Acc:HGNC:10590]
26520	TIMM9	translocase of inner mitochondrial membrane 9 [Source:HGNC Symbol;Acc:HGNC:11819]
55811	ADCY10	adenylate cyclase 10 [Source:HGNC Symbol;Acc:HGNC:21285]
654231	OCM	oncomodulin [Source:HGNC Symbol;Acc:HGNC:8105]
2697	GJA1	gap junction protein alpha 1 [Source:HGNC Symbol;Acc:HGNC:4274]
11130	ZWINT	ZW10 interacting kinetochore protein [Source:HGNC Symbol;Acc:HGNC:13195]
5984	RFC4	replication factor C subunit 4 [Source:HGNC Symbol;Acc:HGNC:9972]
55319	TMA16	translation machinery associated 16 homolog [Source:HGNC Symbol;Acc:HGNC:25638]
284443	ZNF493	zinc finger protein 493 [Source:HGNC Symbol;Acc:HGNC:23708]
153241	CEP120	centrosomal protein 120 [Source:HGNC Symbol;Acc:HGNC:26690]
5149	PDE6H	phosphodiesterase 6H [Source:HGNC Symbol;Acc:HGNC:8790]
55839	CENPN	centromere protein N [Source:HGNC Symbol;Acc:HGNC:30873]
51605	TRMT6	tRNA methyltransferase 6 [Source:HGNC Symbol;Acc:HGNC:20900]
11035	RIPK3	receptor interacting serine/threonine kinase 3 [Source:HGNC Symbol;Acc:HGNC:10021]
10171	RCL1	RNA terminal phosphate cyclase like 1 [Source:HGNC Symbol;Acc:HGNC:17687]
126969	SLC44A3	solute carrier family 44 member 3 [Source:HGNC Symbol;Acc:HGNC:28689]
1662	DDX10	DEAD-box helicase 10 [Source:HGNC Symbol;Acc:HGNC:2735]
83752	LONP2	lon peptidase 2, peroxisomal [Source:HGNC Symbol;Acc:HGNC:20598]
64853	AIDA	axin interactor, dorsalization associated [Source:HGNC Symbol;Acc:HGNC:25761]
3952	LEP	leptin [Source:HGNC Symbol;Acc:HGNC:6553]
56934	CA10	carbonic anhydrase 10 [Source:HGNC Symbol;Acc:HGNC:1369]
4697	NDUFA4	NDUFA4 mitochondrial complex associated [Source:HGNC Symbol;Acc:HGNC:7687]
57128	LYRM4	LYR motif containing 4 [Source:HGNC Symbol;Acc:HGNC:21365]
51373	MRPS17	mitochondrial ribosomal protein S17 [Source:HGNC Symbol;Acc:HGNC:14047]
6361	CCL17	C-C motif chemokine ligand 17 [Source:HGNC Symbol;Acc:HGNC:10615]
79677	SMC6	structural maintenance of chromosomes 6 [Source:HGNC Symbol;Acc:HGNC:20466]
10499	NCOA2	nuclear receptor coactivator 2 [Source:HGNC Symbol;Acc:HGNC:7669]
84549	MAK16	MAK16 homolog [Source:HGNC Symbol;Acc:HGNC:13703]
10557	RPP38	ribonuclease P/MRP subunit p38 [Source:HGNC Symbol;Acc:HGNC:30329]
5981	RFC1	replication factor C subunit 1 [Source:HGNC Symbol;Acc:HGNC:9969]
353189	SLCO4C1	solute carrier organic anion transporter family member 4C1 [Source:HGNC Symbol;Acc:HGNC:23612]
6729	SRP54	signal recognition particle 54 [Source:HGNC Symbol;Acc:HGNC:11301]
10438	C1D	C1D nuclear receptor corepressor [Source:HGNC Symbol;Acc:HGNC:29911]
51778	MYOZ2	myozenin 2 [Source:HGNC Symbol;Acc:HGNC:1330]
1317	SLC31A1	solute carrier family 31 member 1 [Source:HGNC Symbol;Acc:HGNC:11016]
54931	TRMT10C	tRNA methyltransferase 10C, mitochondrial RNase P subunit [Source:HGNC Symbol;Acc:HGNC:26022]
9694	EMC2	ER membrane protein complex subunit 2 [Source:HGNC Symbol;Acc:HGNC:28963]
27086	FOXP1	forkhead box P1 [Source:HGNC Symbol;Acc:HGNC:3823]
7776	ZNF236	zinc finger protein 236 [Source:HGNC Symbol;Acc:HGNC:13028]
5917	RARS1	arginyl-tRNA synthetase 1 [Source:HGNC Symbol;Acc:HGNC:9870]
5393	EXOSC9	exosome component 9 [Source:HGNC Symbol;Acc:HGNC:9137]
7150	TOP 1.00	DNA topoisomerase I [Source:HGNC Symbol;Acc:HGNC:11986]
100129583	FAM47E	family with sequence similarity 47 member E [Source:HGNC Symbol;Acc:HGNC:34343]
10117	ENAM	enamelin [Source:HGNC Symbol;Acc:HGNC:3344]
1060	CENPC	centromere protein C [Source:HGNC Symbol;Acc:HGNC:1854]
10879	SMR3B	submaxillary gland androgen regulated protein 3B [Source:HGNC Symbol;Acc:HGNC:17326]
143425	SYT9	synaptotagmin 9 [Source:HGNC Symbol;Acc:HGNC:19265]
1446	CSN1S1	casein alpha s1 [Source:HGNC Symbol;Acc:HGNC:2445]
255119	CFAP299	cilia and flagella associated protein 299 [Source:HGNC Symbol;Acc:HGNC:28554]
258	AMBN	ameloblastin [Source:HGNC Symbol;Acc:HGNC:452]
260436	FDCSP	follicular dendritic cell secreted protein [Source:HGNC Symbol;Acc:HGNC:19215]
28983	TMPRSS11E	transmembrane serine protease 11E [Source:HGNC Symbol;Acc:HGNC:24465]
2920	CXCL2	C-X-C motif chemokine ligand 2 [Source:HGNC Symbol;Acc:HGNC:4603]
401137	PRR27	proline rich 27 [Source:HGNC Symbol;Acc:HGNC:33193]
4283	CXCL9	C-X-C motif chemokine ligand 9 [Source:HGNC Symbol;Acc:HGNC:7098]
4705	NDUFA10	NADH:ubiquinone oxidoreductase subunit A10 [Source:HGNC Symbol;Acc:HGNC:7684]
51023	MRPS18C	mitochondrial ribosomal protein S18C [Source:HGNC Symbol;Acc:HGNC:16633]
51316	PLAC8	placenta associated 8 [Source:HGNC Symbol;Acc:HGNC:19254]
51520	LARS1	leucyl-tRNA synthetase 1 [Source:HGNC Symbol;Acc:HGNC:6512]
55153	SDAD1	SDA1 domain containing 1 [Source:HGNC Symbol;Acc:HGNC:25537]
55226	NAT10	N-acetyltransferase 10 [Source:HGNC Symbol;Acc:HGNC:29830]
5602	MAPK10	mitogen-activated protein kinase 10 [Source:HGNC Symbol;Acc:HGNC:6872]
56673	C11orf16	chromosome 11 open reading frame 16 [Source:HGNC Symbol;Acc:HGNC:1169]
5682	PSMA1	proteasome 20S subunit alpha 1 [Source:HGNC Symbol;Acc:HGNC:9530]
58503	OPRPN	opiorphin prepropeptide [Source:HGNC Symbol;Acc:HGNC:17279]
6150	MRPL23	mitochondrial ribosomal protein L23 [Source:HGNC Symbol;Acc:HGNC:10322]
6372	CXCL6	C-X-C motif chemokine ligand 6 [Source:HGNC Symbol;Acc:HGNC:10643]
6374	CXCL5	C-X-C motif chemokine ligand 5 [Source:HGNC Symbol;Acc:HGNC:10642]
6779	STATH	statherin [Source:HGNC Symbol;Acc:HGNC:11369]
6783	SULT1E1	sulfotransferase family 1E member 1 [Source:HGNC Symbol;Acc:HGNC:11377]
7364	UGT2B7	UDP glucuronosyltransferase family 2 member B7 [Source:HGNC Symbol;Acc:HGNC:12554]
79587	CARS2	cysteinyl-tRNA synthetase 2, mitochondrial [Source:HGNC Symbol;Acc:HGNC:25695]
83636	C19orf12	chromosome 19 open reading frame 12 [Source:HGNC Symbol;Acc:HGNC:25443]
84103	C4orf17	chromosome 4 open reading frame 17 [Source:HGNC Symbol;Acc:HGNC:25274]

## Sheet: Figure 3E GO splicing
Overlap Results
Collection(s):	GO:BP
# overlaps shown:	50
# genesets in collections:	7481
# genes in comparison (n):	140
# genes in universe (N):	40312
Gene Set Name	# Genes in Gene Set (K)	Description	# Genes in Overlap (k)	k/K	p-value	FDR q-value
GOBP_NEGATIVE_REGULATION_OF_NUCLEOBASE_CONTAINING_COMPOUND_METABOLIC_PROCESS	1519	Any cellular process that stops, prevents, or reduces the frequency, rate or extent of the chemical reactions and pathways involving nucleobases, nucleosides, nucleotides and nucleic acids. [GOC:go_curators]	27	0.0178	2.63e-12	1.82e-08
GOBP_NEGATIVE_REGULATION_OF_BIOSYNTHETIC_PROCESS	1686	Any process that stops, prevents, or reduces the rate of the chemical reactions and pathways resulting in the formation of substances. [GOC:go_curators]	28	0.0166	4.86e-12	1.82e-08
GOBP_CHROMOSOME_ORGANIZATION	1244	A process that is carried out at the cellular level that results in the assembly, arrangement of constituent parts, or disassembly of chromosomes, structures composed of a very long molecule of DNA and associated proteins that carries hereditary information. This term covers covalent modifications at the molecular level as well as spatial relationships among the major components of a chromosome. …	24	0.0193	9.4e-12	2.35e-08
GOBP_CHROMATIN_ORGANIZATION_INVOLVED_IN_REGULATION_OF_TRANSCRIPTION	154	Any cellular process that results in the specification, formation or maintenance of the physical structure of eukaryotic chromatin that modulates the rate, frequency or extent of DNA-dependent transcription. [GOC:curators, PMID:21102443]	10	0.0649	1.85e-10	3.46e-07
GOBP_HETEROCHROMATIN_ORGANIZATION	80	Any process that results in the specification, formation or maintenance of the physical structure of eukaryotic heterochromatin, a compact and highly condensed form of chromatin. [GOC:mah]	8	0.1	4.06e-10	6.01e-07
GOBP_CHROMATIN_ORGANIZATION	807	Any process that results in the specification, formation or maintenance of the physical structure of eukaryotic chromatin. [GOC:mah, GOC:vw, PMID:20404130]	18	0.0223	4.82e-10	6.01e-07
GOBP_NEGATIVE_REGULATION_OF_GENE_EXPRESSION_EPIGENETIC	125	Any epigenetic process that stops, prevents or reduces the rate of gene expression. [GOC:go_curators]	9	0.072	6.16e-10	6.58e-07
GOBP_DNA_METABOLIC_PROCESS	949	Any cellular metabolic process involving deoxyribonucleic acid. This is one of the two main types of nucleic acid, consisting of a long, unbranched macromolecule formed from one, or more commonly, two, strands of linked deoxyribonucleotides. [ISBN:0198506732]	19	0.02	9.15e-10	8.01e-07
GOBP_ATP_DEPENDENT_CHROMATIN_REMODELING	89	Dynamic structural changes to eukaryotic chromatin that require energy from the hydrolysis of ATP, ranging from local changes necessary for transcriptional regulation to global changes necessary for chromosome segregation, mediated by ATP-dependent chromatin-remodelling factors. [GOC:jl, PMID:12042764]	8	0.0899	9.64e-10	8.01e-07
GOBP_DNA_REPLICATION_DEPENDENT_NUCLEOSOME_ORGANIZATION	32	The formation or destruction of chromatin structures on newly replicated DNA, coupled to strand elongation. [GOC:mah, PMID:17510629]	6	0.1875	1.32e-09	9.91e-07
GOBP_RNA_SPLICING	478	The process of removing sections of the primary RNA transcript to remove sequences not present in the mature form of the RNA and joining the remaining sections to form the mature form of the RNA. [GOC:krc, GOC:mah]	14	0.0293	1.5e-09	1.02e-06
GOBP_MYELOID_CELL_DIFFERENTIATION	419	The process in which a relatively unspecialized myeloid precursor cell acquires the specialized features of any cell of the myeloid leukocyte, megakaryocyte, thrombocyte, or erythrocyte lineages. [GOC:add, ISBN:0781735149]	13	0.031	2.99e-09	1.73e-06
GOBP_REGULATION_OF_GENE_EXPRESSION_EPIGENETIC	205	Any process that modulates the frequency, rate or extent of gene expression; the process is mitotically or meiotically heritable, or is stably self-propagated in the cytoplasm of a resting cell, and does not entail a change in DNA sequence. [PMID:10521337, PMID:11498582]	10	0.0488	3e-09	1.73e-06
GOBP_CHROMATIN_REMODELING	209	Dynamic structural changes to eukaryotic chromatin occurring throughout the cell division cycle. These changes range from the local changes necessary for transcriptional regulation to global changes necessary for chromosome segregation. [GOC:jid, GOC:vw, PMID:12697820]	10	0.0478	3.61e-09	1.93e-06
GOBP_RDNA_HETEROCHROMATIN_ASSEMBLY	39	The assembly of chromatin characterized by the modified histone H3K9me3, into heterochromatin, resulting in the repression of transcription of rDNA. [PMID:10219245]	6	0.1538	4.68e-09	2.33e-06
GOBP_NEGATIVE_REGULATION_OF_GENE_EXPRESSION	1709	Any process that decreases the frequency, rate or extent of gene expression. Gene expression is the process in which a gene's coding sequence is converted into a mature gene product or products (proteins or RNA). This includes the production of an RNA transcript as well as any processing to produce a mature RNA product or an mRNA or circRNA (for protein-coding genes) and the translation of that m…	24	0.014	5.44e-09	2.54e-06
GOBP_MRNA_PROCESSING	543	Any process involved in the conversion of a primary mRNA transcript into one or more mature mRNA(s) prior to translation into polypeptide. [GOC:mah]	14	0.0258	7.57e-09	3.33e-06
GOBP_CELLULAR_RESPONSE_TO_DNA_DAMAGE_STIMULUS	869	Any process that results in a change in state or activity of a cell (in terms of movement, secretion, enzyme production, gene expression, etc.) as a result of a stimulus indicating damage to its DNA from environmental insults or errors during metabolism. [GOC:go_curators]	17	0.0196	1.05e-08	4.29e-06
GOBP_TELOMERE_ORGANIZATION	174	A process that is carried out at the cellular level which results in the assembly, arrangement of constituent parts, or disassembly of telomeres, terminal regions of a linear chromosome that include the telomeric DNA repeats and associated proteins. [GOC:dph, GOC:jl, GOC:mah]	9	0.0517	1.14e-08	4.29e-06
GOBP_RNA_SPLICING_VIA_TRANSESTERIFICATION_REACTIONS	384	Splicing of RNA via a series of two transesterification reactions. [GOC:krc]	12	0.0312	1.15e-08	4.29e-06
GOBP_DNA_PACKAGING	240	Any process in which DNA and associated proteins are formed into a compact, orderly structure. [GOC:mah, ISBN:0815316194]	10	0.0417	1.35e-08	4.82e-06
GOBP_REGULATION_OF_MEGAKARYOCYTE_DIFFERENTIATION	83	Any process that modulates the frequency, rate or extent of megakaryocyte differentiation. [GOC:go_curators]	7	0.0843	1.75e-08	5.74e-06
GOBP_NUCLEOSOME_ORGANIZATION	183	A process that is carried out at the cellular level which results in the assembly, arrangement of constituent parts, or disassembly of one or more nucleosomes. [GOC:mah]	9	0.0492	1.77e-08	5.74e-06
GOBP_REGULATION_OF_MYELOID_CELL_DIFFERENTIATION	258	Any process that modulates the frequency, rate or extent of myeloid cell differentiation. [GOC:go_curators]	10	0.0388	2.68e-08	8.35e-06
GOBP_REGULATION_OF_GENE_SILENCING	143	Any process that modulates the rate, frequency, or extent of gene silencing, the transcriptional or post-transcriptional process carried out at the cellular level that results in long-term gene inactivation. [GOC:dph, GOC:tb]	8	0.0559	4.14e-08	1.24e-05
GOBP_CENTROMERE_COMPLEX_ASSEMBLY	56	The aggregation, arrangement and bonding together of proteins and centromeric DNA molecules to form a centromeric protein-DNA complex. Includes the formation of the chromatin structures which form a platform for the kinetochore, and assembly of the kinetochore onto this specialized chromatin. In fission yeast and higher eukaryotes this process also includes the formation of heterochromatin at the…	6	0.1071	4.43e-08	1.28e-05
GOBP_NUCLEOSOME_ASSEMBLY	145	The aggregation, arrangement and bonding together of a nucleosome, the beadlike structural units of eukaryotic chromatin composed of histones and DNA. [GOC:mah]	8	0.0552	4.62e-08	1.28e-05
GOBP_DNA_CONFORMATION_CHANGE	352	A cellular process that results in a change in the spatial configuration of a DNA molecule. A conformation change can bend DNA, or alter the, twist, writhe, or linking number of a DNA molecule. [GOC:mah]	11	0.0312	4.79e-08	1.28e-05
GOBP_HISTONE_EXCHANGE	58	The replacement, within chromatin, of resident histones or histone subunits with alternative, sometimes variant, histones or subunits. [GOC:jl, PMID:11735001, PMID:15066277]	6	0.1034	5.5e-08	1.42e-05
GOBP_PROTEIN_DNA_COMPLEX_SUBUNIT_ORGANIZATION	281	Any process in which macromolecules aggregate, disaggregate, or are modified, resulting in the formation, disassembly, or alteration of a protein-DNA complex. [GOC:mah]	10	0.0356	5.97e-08	1.49e-05
GOBP_MEGAKARYOCYTE_DIFFERENTIATION	100	The process in which a myeloid precursor cell acquires specializes features of a megakaryocyte. [GOC:mah]	7	0.07	6.41e-08	1.55e-05
GOBP_IMMUNE_SYSTEM_DEVELOPMENT	989	The process whose specific outcome is the progression of an organismal system whose objective is to provide calibrated responses by an organism to a potential internal or invasive threat, over time, from its formation to the mature structure. A system is a regularly interacting or interdependent group of organs or tissues that work together to carry out a given biological process. [GOC:add, GOC:d…	17	0.0172	6.83e-08	1.6e-05
GOBP_MRNA_METABOLIC_PROCESS	879	The chemical reactions and pathways involving mRNA, messenger RNA, which is responsible for carrying the coded genetic 'message', transcribed from DNA, to sites of protein assembly at the ribosomes. [ISBN:0198506732]	16	0.0182	7.88e-08	1.79e-05
GOBP_CHROMATIN_ASSEMBLY_OR_DISASSEMBLY	221	The formation or destruction of chromatin structures. [GOC:mah]	9	0.0407	8.94e-08	1.97e-05
GOBP_CELL_CYCLE	1872	The progression of biochemical and morphological phases and events that occur in a cell during successive cell replication or nuclear replication events. Canonically, the cell cycle comprises the replication and segregation of genetic material followed by the division of the cell, but in endocycles or syncytial cells nuclear replication or nuclear division may not be followed by cell division. [G…	23	0.0123	1.33e-07	2.84e-05
GOBP_CELL_DIVISION	600	The process resulting in division and partitioning of components of a cell to form more cells; may or may not be accompanied by the physical separation of a cell into distinct, individually membrane-bounded daughter cells. [GOC:di, GOC:go_curators, GOC:pr]	13	0.0217	1.98e-07	4.11e-05
GOBP_REGULATION_OF_HEMOPOIESIS	415	Any process that modulates the frequency, rate or extent of hemopoiesis. [GO_REF:0000058, GOC:pad, GOC:PARL, GOC:TermGenie, PMID:20080761]	11	0.0265	2.49e-07	5.04e-05
GOBP_REGULATION_OF_GENE_SILENCING_BY_RNA	124	Any process that regulates the rate, frequency, or extent of gene silencing by RNA. Gene silencing by RNA is the process in which RNA molecules inactivate expression of target genes. [GOC:dph, GOC:tb]	7	0.0565	2.81e-07	5.53e-05
GOBP_PROTEIN_CONTAINING_COMPLEX_SUBUNIT_ORGANIZATION	1959	Any process in which macromolecules aggregate, disaggregate, or are modified, resulting in the formation, disassembly, or alteration of a protein complex. [GOC:mah]	23	0.0117	2.96e-07	5.67e-05
GOBP_REGULATION_OF_MULTICELLULAR_ORGANISMAL_DEVELOPMENT	1397	Any process that modulates the frequency, rate or extent of multicellular organismal development. [GOC:obol]	19	0.0136	4.09e-07	7.49e-05
GOBP_NEGATIVE_REGULATION_OF_MEGAKARYOCYTE_DIFFERENTIATION	18	Any process that stops, prevents, or reduces the frequency, rate or extent of megakaryocyte differentiation. [GOC:go_curators]	4	0.2222	4.11e-07	7.49e-05
GOBP_BIOLOGICAL_PROCESS_INVOLVED_IN_SYMBIOTIC_INTERACTION	997	A process carried out by gene products in an organism that enable the organism to engage in a symbiotic relationship, a more or less intimate association, with another organism. The various forms of symbiosis include parasitism, in which the association is disadvantageous or destructive to one of the organisms; mutualism, in which the association is advantageous, or often necessary to one or both…	16	0.016	4.25e-07	7.57e-05
GOBP_CELL_CYCLE_PROCESS	1415	The cellular process that ensures successive accurate and complete genome replication and chromosome segregation. [GOC:isa_complete, GOC:mtg_cell_cycle]	19	0.0134	4.96e-07	8.62e-05
GOBP_CHROMATIN_REMODELING_AT_CENTROMERE	47	Dynamic structural changes in centromeric DNA. [GOC:mah]	5	0.1064	6.41e-07	0.000109
GOBP_NEGATIVE_REGULATION_OF_MOLECULAR_FUNCTION	1167	Any process that stops or reduces the rate or extent of a molecular function, an elemental biological activity occurring at the molecular level, such as catalysis or binding. [GO:jl]	17	0.0146	6.9e-07	0.000115
GOBP_POSTTRANSCRIPTIONAL_REGULATION_OF_GENE_EXPRESSION	1174	Any process that modulates the frequency, rate or extent of gene expression after the production of an RNA transcript. [GOC:dph, GOC:tb]	17	0.0145	7.49e-07	0.000122
GOBP_REGULATION_OF_RNA_SPLICING	144	Any process that modulates the frequency, rate or extent of RNA splicing, the process of removing sections of the primary RNA transcript to remove sequences not present in the mature form of the RNA and joining the remaining sections to form the mature form of the RNA. [GOC:jl]	7	0.0486	7.74e-07	0.000123
GOBP_REGULATION_OF_CELL_DIFFERENTIATION	1618	Any process that modulates the frequency, rate or extent of cell differentiation, the process in which relatively unspecialized cells acquire specialized structural and functional features. [GOC:go_curators]	20	0.0124	8.76e-07	0.000136
GOBP_DNA_REPLICATION_INDEPENDENT_NUCLEOSOME_ORGANIZATION	54	The formation or destruction of chromatin structures, occurring outside the context of DNA replication. [GOC:mah, PMID:17510629]	5	0.0926	1.3e-06	0.000198
GOBP_TELOMERE_CAPPING	55	A process in which telomeres are protected from degradation and fusion, thereby ensuring chromosome stability by protecting the ends from both degradation and from being recognized as damaged DNA. May be mediated by specific single- or double-stranded telomeric DNA binding proteins. [GOC:mah, GOC:rn, PMID:11349150, PMID:11352055]	5	0.0909	1.42e-06	0.000211
Gene/Gene Set Overlap Matrix
Entrez Gene Id	Gene Symbol	Gene Description	GOBP_NEGATIVE_REGULATION_OF_NUCLEOBASE_CONTAINING_COMPOUND_METABOLIC_PROCESS	GOBP_NEGATIVE_REGULATION_OF_BIOSYNTHETIC_PROCESS	GOBP_CHROMOSOME_ORGANIZATION	GOBP_CHROMATIN_ORGANIZATION_INVOLVED_IN_REGULATION_OF_TRANSCRIPTION	GOBP_HETEROCHROMATIN_ORGANIZATION	GOBP_CHROMATIN_ORGANIZATION	GOBP_NEGATIVE_REGULATION_OF_GENE_EXPRESSION_EPIGENETIC	GOBP_DNA_METABOLIC_PROCESS	GOBP_ATP_DEPENDENT_CHROMATIN_REMODELING	GOBP_DNA_REPLICATION_DEPENDENT_NUCLEOSOME_ORGANIZATION	GOBP_RNA_SPLICING	GOBP_MYELOID_CELL_DIFFERENTIATION	GOBP_REGULATION_OF_GENE_EXPRESSION_EPIGENETIC	GOBP_CHROMATIN_REMODELING	GOBP_RDNA_HETEROCHROMATIN_ASSEMBLY	GOBP_NEGATIVE_REGULATION_OF_GENE_EXPRESSION	GOBP_MRNA_PROCESSING	GOBP_CELLULAR_RESPONSE_TO_DNA_DAMAGE_STIMULUS	GOBP_TELOMERE_ORGANIZATION	GOBP_RNA_SPLICING_VIA_TRANSESTERIFICATION_REACTIONS	GOBP_DNA_PACKAGING	GOBP_REGULATION_OF_MEGAKARYOCYTE_DIFFERENTIATION	GOBP_NUCLEOSOME_ORGANIZATION	GOBP_REGULATION_OF_MYELOID_CELL_DIFFERENTIATION	GOBP_REGULATION_OF_GENE_SILENCING	GOBP_CENTROMERE_COMPLEX_ASSEMBLY	GOBP_NUCLEOSOME_ASSEMBLY	GOBP_DNA_CONFORMATION_CHANGE	GOBP_HISTONE_EXCHANGE	GOBP_PROTEIN_DNA_COMPLEX_SUBUNIT_ORGANIZATION	GOBP_MEGAKARYOCYTE_DIFFERENTIATION	GOBP_IMMUNE_SYSTEM_DEVELOPMENT	GOBP_MRNA_METABOLIC_PROCESS	GOBP_CHROMATIN_ASSEMBLY_OR_DISASSEMBLY	GOBP_CELL_CYCLE	GOBP_CELL_DIVISION	GOBP_REGULATION_OF_HEMOPOIESIS	GOBP_REGULATION_OF_GENE_SILENCING_BY_RNA	GOBP_PROTEIN_CONTAINING_COMPLEX_SUBUNIT_ORGANIZATION	GOBP_REGULATION_OF_MULTICELLULAR_ORGANISMAL_DEVELOPMENT	GOBP_NEGATIVE_REGULATION_OF_MEGAKARYOCYTE_DIFFERENTIATION	GOBP_BIOLOGICAL_PROCESS_INVOLVED_IN_SYMBIOTIC_INTERACTION	GOBP_CELL_CYCLE_PROCESS	GOBP_CHROMATIN_REMODELING_AT_CENTROMERE	GOBP_NEGATIVE_REGULATION_OF_MOLECULAR_FUNCTION	GOBP_POSTTRANSCRIPTIONAL_REGULATION_OF_GENE_EXPRESSION	GOBP_REGULATION_OF_RNA_SPLICING
121504	H4-16	H4 histone 16 [Source:HGNC Symbol;Acc:HGNC:20510]	GOBP_NEGATIVE_REGULATION_OF_NUCLEOBASE_CONTAINING_COMPOUND_METABOLIC_PROCESS	GOBP_NEGATIVE_REGULATION_OF_BIOSYNTHETIC_PROCESS	GOBP_CHROMOSOME_ORGANIZATION	GOBP_CHROMATIN_ORGANIZATION_INVOLVED_IN_REGULATION_OF_TRANSCRIPTION	GOBP_HETEROCHROMATIN_ORGANIZATION	GOBP_CHROMATIN_ORGANIZATION	GOBP_NEGATIVE_REGULATION_OF_GENE_EXPRESSION_EPIGENETIC	GOBP_DNA_METABOLIC_PROCESS	GOBP_ATP_DEPENDENT_CHROMATIN_REMODELING	GOBP_DNA_REPLICATION_DEPENDENT_NUCLEOSOME_ORGANIZATION		GOBP_MYELOID_CELL_DIFFERENTIATION	GOBP_REGULATION_OF_GENE_EXPRESSION_EPIGENETIC	GOBP_CHROMATIN_REMODELING	GOBP_RDNA_HETEROCHROMATIN_ASSEMBLY	GOBP_NEGATIVE_REGULATION_OF_GENE_EXPRESSION		GOBP_CELLULAR_RESPONSE_TO_DNA_DAMAGE_STIMULUS	GOBP_TELOMERE_ORGANIZATION		GOBP_DNA_PACKAGING	GOBP_REGULATION_OF_MEGAKARYOCYTE_DIFFERENTIATION	GOBP_NUCLEOSOME_ORGANIZATION	GOBP_REGULATION_OF_MYELOID_CELL_DIFFERENTIATION	GOBP_REGULATION_OF_GENE_SILENCING	GOBP_CENTROMERE_COMPLEX_ASSEMBLY	GOBP_NUCLEOSOME_ASSEMBLY	GOBP_DNA_CONFORMATION_CHANGE	GOBP_HISTONE_EXCHANGE	GOBP_PROTEIN_DNA_COMPLEX_SUBUNIT_ORGANIZATION	GOBP_MEGAKARYOCYTE_DIFFERENTIATION	GOBP_IMMUNE_SYSTEM_DEVELOPMENT		GOBP_CHROMATIN_ASSEMBLY_OR_DISASSEMBLY			GOBP_REGULATION_OF_HEMOPOIESIS	GOBP_REGULATION_OF_GENE_SILENCING_BY_RNA	GOBP_PROTEIN_CONTAINING_COMPLEX_SUBUNIT_ORGANIZATION	GOBP_REGULATION_OF_MULTICELLULAR_ORGANISMAL_DEVELOPMENT	GOBP_NEGATIVE_REGULATION_OF_MEGAKARYOCYTE_DIFFERENTIATION			GOBP_CHROMATIN_REMODELING_AT_CENTROMERE		GOBP_POSTTRANSCRIPTIONAL_REGULATION_OF_GENE_EXPRESSION
8294	H4C9	H4 clustered histone 9 [Source:HGNC Symbol;Acc:HGNC:4793]	GOBP_NEGATIVE_REGULATION_OF_NUCLEOBASE_CONTAINING_COMPOUND_METABOLIC_PROCESS	GOBP_NEGATIVE_REGULATION_OF_BIOSYNTHETIC_PROCESS	GOBP_CHROMOSOME_ORGANIZATION	GOBP_CHROMATIN_ORGANIZATION_INVOLVED_IN_REGULATION_OF_TRANSCRIPTION	GOBP_HETEROCHROMATIN_ORGANIZATION	GOBP_CHROMATIN_ORGANIZATION	GOBP_NEGATIVE_REGULATION_OF_GENE_EXPRESSION_EPIGENETIC	GOBP_DNA_METABOLIC_PROCESS	GOBP_ATP_DEPENDENT_CHROMATIN_REMODELING	GOBP_DNA_REPLICATION_DEPENDENT_NUCLEOSOME_ORGANIZATION		GOBP_MYELOID_CELL_DIFFERENTIATION	GOBP_REGULATION_OF_GENE_EXPRESSION_EPIGENETIC	GOBP_CHROMATIN_REMODELING	GOBP_RDNA_HETEROCHROMATIN_ASSEMBLY	GOBP_NEGATIVE_REGULATION_OF_GENE_EXPRESSION		GOBP_CELLULAR_RESPONSE_TO_DNA_DAMAGE_STIMULUS	GOBP_TELOMERE_ORGANIZATION		GOBP_DNA_PACKAGING	GOBP_REGULATION_OF_MEGAKARYOCYTE_DIFFERENTIATION	GOBP_NUCLEOSOME_ORGANIZATION	GOBP_REGULATION_OF_MYELOID_CELL_DIFFERENTIATION	GOBP_REGULATION_OF_GENE_SILENCING	GOBP_CENTROMERE_COMPLEX_ASSEMBLY	GOBP_NUCLEOSOME_ASSEMBLY	GOBP_DNA_CONFORMATION_CHANGE	GOBP_HISTONE_EXCHANGE	GOBP_PROTEIN_DNA_COMPLEX_SUBUNIT_ORGANIZATION	GOBP_MEGAKARYOCYTE_DIFFERENTIATION	GOBP_IMMUNE_SYSTEM_DEVELOPMENT		GOBP_CHROMATIN_ASSEMBLY_OR_DISASSEMBLY			GOBP_REGULATION_OF_HEMOPOIESIS	GOBP_REGULATION_OF_GENE_SILENCING_BY_RNA	GOBP_PROTEIN_CONTAINING_COMPLEX_SUBUNIT_ORGANIZATION	GOBP_REGULATION_OF_MULTICELLULAR_ORGANISMAL_DEVELOPMENT	GOBP_NEGATIVE_REGULATION_OF_MEGAKARYOCYTE_DIFFERENTIATION			GOBP_CHROMATIN_REMODELING_AT_CENTROMERE		GOBP_POSTTRANSCRIPTIONAL_REGULATION_OF_GENE_EXPRESSION
8362	H4C12	H4 clustered histone 12 [Source:HGNC Symbol;Acc:HGNC:4784]	GOBP_NEGATIVE_REGULATION_OF_NUCLEOBASE_CONTAINING_COMPOUND_METABOLIC_PROCESS	GOBP_NEGATIVE_REGULATION_OF_BIOSYNTHETIC_PROCESS	GOBP_CHROMOSOME_ORGANIZATION	GOBP_CHROMATIN_ORGANIZATION_INVOLVED_IN_REGULATION_OF_TRANSCRIPTION	GOBP_HETEROCHROMATIN_ORGANIZATION	GOBP_CHROMATIN_ORGANIZATION	GOBP_NEGATIVE_REGULATION_OF_GENE_EXPRESSION_EPIGENETIC	GOBP_DNA_METABOLIC_PROCESS	GOBP_ATP_DEPENDENT_CHROMATIN_REMODELING	GOBP_DNA_REPLICATION_DEPENDENT_NUCLEOSOME_ORGANIZATION		GOBP_MYELOID_CELL_DIFFERENTIATION	GOBP_REGULATION_OF_GENE_EXPRESSION_EPIGENETIC	GOBP_CHROMATIN_REMODELING	GOBP_RDNA_HETEROCHROMATIN_ASSEMBLY	GOBP_NEGATIVE_REGULATION_OF_GENE_EXPRESSION		GOBP_CELLULAR_RESPONSE_TO_DNA_DAMAGE_STIMULUS	GOBP_TELOMERE_ORGANIZATION		GOBP_DNA_PACKAGING	GOBP_REGULATION_OF_MEGAKARYOCYTE_DIFFERENTIATION	GOBP_NUCLEOSOME_ORGANIZATION	GOBP_REGULATION_OF_MYELOID_CELL_DIFFERENTIATION	GOBP_REGULATION_OF_GENE_SILENCING	GOBP_CENTROMERE_COMPLEX_ASSEMBLY	GOBP_NUCLEOSOME_ASSEMBLY	GOBP_DNA_CONFORMATION_CHANGE	GOBP_HISTONE_EXCHANGE	GOBP_PROTEIN_DNA_COMPLEX_SUBUNIT_ORGANIZATION	GOBP_MEGAKARYOCYTE_DIFFERENTIATION	GOBP_IMMUNE_SYSTEM_DEVELOPMENT		GOBP_CHROMATIN_ASSEMBLY_OR_DISASSEMBLY			GOBP_REGULATION_OF_HEMOPOIESIS	GOBP_REGULATION_OF_GENE_SILENCING_BY_RNA	GOBP_PROTEIN_CONTAINING_COMPLEX_SUBUNIT_ORGANIZATION	GOBP_REGULATION_OF_MULTICELLULAR_ORGANISMAL_DEVELOPMENT	GOBP_NEGATIVE_REGULATION_OF_MEGAKARYOCYTE_DIFFERENTIATION			GOBP_CHROMATIN_REMODELING_AT_CENTROMERE		GOBP_POSTTRANSCRIPTIONAL_REGULATION_OF_GENE_EXPRESSION
8363	H4C11	H4 clustered histone 11 [Source:HGNC Symbol;Acc:HGNC:4785]	GOBP_NEGATIVE_REGULATION_OF_NUCLEOBASE_CONTAINING_COMPOUND_METABOLIC_PROCESS	GOBP_NEGATIVE_REGULATION_OF_BIOSYNTHETIC_PROCESS	GOBP_CHROMOSOME_ORGANIZATION	GOBP_CHROMATIN_ORGANIZATION_INVOLVED_IN_REGULATION_OF_TRANSCRIPTION	GOBP_HETEROCHROMATIN_ORGANIZATION	GOBP_CHROMATIN_ORGANIZATION	GOBP_NEGATIVE_REGULATION_OF_GENE_EXPRESSION_EPIGENETIC	GOBP_DNA_METABOLIC_PROCESS	GOBP_ATP_DEPENDENT_CHROMATIN_REMODELING	GOBP_DNA_REPLICATION_DEPENDENT_NUCLEOSOME_ORGANIZATION		GOBP_MYELOID_CELL_DIFFERENTIATION	GOBP_REGULATION_OF_GENE_EXPRESSION_EPIGENETIC	GOBP_CHROMATIN_REMODELING	GOBP_RDNA_HETEROCHROMATIN_ASSEMBLY	GOBP_NEGATIVE_REGULATION_OF_GENE_EXPRESSION		GOBP_CELLULAR_RESPONSE_TO_DNA_DAMAGE_STIMULUS	GOBP_TELOMERE_ORGANIZATION		GOBP_DNA_PACKAGING	GOBP_REGULATION_OF_MEGAKARYOCYTE_DIFFERENTIATION	GOBP_NUCLEOSOME_ORGANIZATION	GOBP_REGULATION_OF_MYELOID_CELL_DIFFERENTIATION	GOBP_REGULATION_OF_GENE_SILENCING	GOBP_CENTROMERE_COMPLEX_ASSEMBLY	GOBP_NUCLEOSOME_ASSEMBLY	GOBP_DNA_CONFORMATION_CHANGE	GOBP_HISTONE_EXCHANGE	GOBP_PROTEIN_DNA_COMPLEX_SUBUNIT_ORGANIZATION	GOBP_MEGAKARYOCYTE_DIFFERENTIATION	GOBP_IMMUNE_SYSTEM_DEVELOPMENT		GOBP_CHROMATIN_ASSEMBLY_OR_DISASSEMBLY			GOBP_REGULATION_OF_HEMOPOIESIS	GOBP_REGULATION_OF_GENE_SILENCING_BY_RNA	GOBP_PROTEIN_CONTAINING_COMPLEX_SUBUNIT_ORGANIZATION	GOBP_REGULATION_OF_MULTICELLULAR_ORGANISMAL_DEVELOPMENT	GOBP_NEGATIVE_REGULATION_OF_MEGAKARYOCYTE_DIFFERENTIATION			GOBP_CHROMATIN_REMODELING_AT_CENTROMERE		GOBP_POSTTRANSCRIPTIONAL_REGULATION_OF_GENE_EXPRESSION
8354	H3C11	H3 clustered histone 11 [Source:HGNC Symbol;Acc:HGNC:4771]	GOBP_NEGATIVE_REGULATION_OF_NUCLEOBASE_CONTAINING_COMPOUND_METABOLIC_PROCESS	GOBP_NEGATIVE_REGULATION_OF_BIOSYNTHETIC_PROCESS	GOBP_CHROMOSOME_ORGANIZATION	GOBP_CHROMATIN_ORGANIZATION_INVOLVED_IN_REGULATION_OF_TRANSCRIPTION	GOBP_HETEROCHROMATIN_ORGANIZATION	GOBP_CHROMATIN_ORGANIZATION	GOBP_NEGATIVE_REGULATION_OF_GENE_EXPRESSION_EPIGENETIC			GOBP_DNA_REPLICATION_DEPENDENT_NUCLEOSOME_ORGANIZATION		GOBP_MYELOID_CELL_DIFFERENTIATION	GOBP_REGULATION_OF_GENE_EXPRESSION_EPIGENETIC	GOBP_CHROMATIN_REMODELING	GOBP_RDNA_HETEROCHROMATIN_ASSEMBLY	GOBP_NEGATIVE_REGULATION_OF_GENE_EXPRESSION			GOBP_TELOMERE_ORGANIZATION		GOBP_DNA_PACKAGING	GOBP_REGULATION_OF_MEGAKARYOCYTE_DIFFERENTIATION	GOBP_NUCLEOSOME_ORGANIZATION	GOBP_REGULATION_OF_MYELOID_CELL_DIFFERENTIATION	GOBP_REGULATION_OF_GENE_SILENCING		GOBP_NUCLEOSOME_ASSEMBLY	GOBP_DNA_CONFORMATION_CHANGE		GOBP_PROTEIN_DNA_COMPLEX_SUBUNIT_ORGANIZATION	GOBP_MEGAKARYOCYTE_DIFFERENTIATION	GOBP_IMMUNE_SYSTEM_DEVELOPMENT		GOBP_CHROMATIN_ASSEMBLY_OR_DISASSEMBLY			GOBP_REGULATION_OF_HEMOPOIESIS	GOBP_REGULATION_OF_GENE_SILENCING_BY_RNA	GOBP_PROTEIN_CONTAINING_COMPLEX_SUBUNIT_ORGANIZATION	GOBP_REGULATION_OF_MULTICELLULAR_ORGANISMAL_DEVELOPMENT						GOBP_POSTTRANSCRIPTIONAL_REGULATION_OF_GENE_EXPRESSION
8357	H3C10	H3 clustered histone 10 [Source:HGNC Symbol;Acc:HGNC:4775]	GOBP_NEGATIVE_REGULATION_OF_NUCLEOBASE_CONTAINING_COMPOUND_METABOLIC_PROCESS	GOBP_NEGATIVE_REGULATION_OF_BIOSYNTHETIC_PROCESS	GOBP_CHROMOSOME_ORGANIZATION	GOBP_CHROMATIN_ORGANIZATION_INVOLVED_IN_REGULATION_OF_TRANSCRIPTION	GOBP_HETEROCHROMATIN_ORGANIZATION	GOBP_CHROMATIN_ORGANIZATION	GOBP_NEGATIVE_REGULATION_OF_GENE_EXPRESSION_EPIGENETIC			GOBP_DNA_REPLICATION_DEPENDENT_NUCLEOSOME_ORGANIZATION		GOBP_MYELOID_CELL_DIFFERENTIATION	GOBP_REGULATION_OF_GENE_EXPRESSION_EPIGENETIC	GOBP_CHROMATIN_REMODELING	GOBP_RDNA_HETEROCHROMATIN_ASSEMBLY	GOBP_NEGATIVE_REGULATION_OF_GENE_EXPRESSION			GOBP_TELOMERE_ORGANIZATION		GOBP_DNA_PACKAGING	GOBP_REGULATION_OF_MEGAKARYOCYTE_DIFFERENTIATION	GOBP_NUCLEOSOME_ORGANIZATION	GOBP_REGULATION_OF_MYELOID_CELL_DIFFERENTIATION	GOBP_REGULATION_OF_GENE_SILENCING		GOBP_NUCLEOSOME_ASSEMBLY	GOBP_DNA_CONFORMATION_CHANGE		GOBP_PROTEIN_DNA_COMPLEX_SUBUNIT_ORGANIZATION	GOBP_MEGAKARYOCYTE_DIFFERENTIATION	GOBP_IMMUNE_SYSTEM_DEVELOPMENT		GOBP_CHROMATIN_ASSEMBLY_OR_DISASSEMBLY			GOBP_REGULATION_OF_HEMOPOIESIS	GOBP_REGULATION_OF_GENE_SILENCING_BY_RNA	GOBP_PROTEIN_CONTAINING_COMPLEX_SUBUNIT_ORGANIZATION	GOBP_REGULATION_OF_MULTICELLULAR_ORGANISMAL_DEVELOPMENT						GOBP_POSTTRANSCRIPTIONAL_REGULATION_OF_GENE_EXPRESSION
3065	HDAC1	histone deacetylase 1 [Source:HGNC Symbol;Acc:HGNC:4852]	GOBP_NEGATIVE_REGULATION_OF_NUCLEOBASE_CONTAINING_COMPOUND_METABOLIC_PROCESS	GOBP_NEGATIVE_REGULATION_OF_BIOSYNTHETIC_PROCESS	GOBP_CHROMOSOME_ORGANIZATION	GOBP_CHROMATIN_ORGANIZATION_INVOLVED_IN_REGULATION_OF_TRANSCRIPTION	GOBP_HETEROCHROMATIN_ORGANIZATION	GOBP_CHROMATIN_ORGANIZATION			GOBP_ATP_DEPENDENT_CHROMATIN_REMODELING			GOBP_MYELOID_CELL_DIFFERENTIATION		GOBP_CHROMATIN_REMODELING		GOBP_NEGATIVE_REGULATION_OF_GENE_EXPRESSION					GOBP_DNA_PACKAGING	GOBP_REGULATION_OF_MEGAKARYOCYTE_DIFFERENTIATION		GOBP_REGULATION_OF_MYELOID_CELL_DIFFERENTIATION				GOBP_DNA_CONFORMATION_CHANGE			GOBP_MEGAKARYOCYTE_DIFFERENTIATION	GOBP_IMMUNE_SYSTEM_DEVELOPMENT		GOBP_CHROMATIN_ASSEMBLY_OR_DISASSEMBLY			GOBP_REGULATION_OF_HEMOPOIESIS		GOBP_PROTEIN_CONTAINING_COMPLEX_SUBUNIT_ORGANIZATION	GOBP_REGULATION_OF_MULTICELLULAR_ORGANISMAL_DEVELOPMENT		GOBP_BIOLOGICAL_PROCESS_INVOLVED_IN_SYMBIOTIC_INTERACTION
3006	H1-2	H1.2 linker histone, cluster member [Source:HGNC Symbol;Acc:HGNC:4716]	GOBP_NEGATIVE_REGULATION_OF_NUCLEOBASE_CONTAINING_COMPOUND_METABOLIC_PROCESS	GOBP_NEGATIVE_REGULATION_OF_BIOSYNTHETIC_PROCESS	GOBP_CHROMOSOME_ORGANIZATION	GOBP_CHROMATIN_ORGANIZATION_INVOLVED_IN_REGULATION_OF_TRANSCRIPTION		GOBP_CHROMATIN_ORGANIZATION	GOBP_NEGATIVE_REGULATION_OF_GENE_EXPRESSION_EPIGENETIC	GOBP_DNA_METABOLIC_PROCESS					GOBP_REGULATION_OF_GENE_EXPRESSION_EPIGENETIC			GOBP_NEGATIVE_REGULATION_OF_GENE_EXPRESSION					GOBP_DNA_PACKAGING		GOBP_NUCLEOSOME_ORGANIZATION		GOBP_REGULATION_OF_GENE_SILENCING		GOBP_NUCLEOSOME_ASSEMBLY	GOBP_DNA_CONFORMATION_CHANGE		GOBP_PROTEIN_DNA_COMPLEX_SUBUNIT_ORGANIZATION				GOBP_CHROMATIN_ASSEMBLY_OR_DISASSEMBLY					GOBP_PROTEIN_CONTAINING_COMPLEX_SUBUNIT_ORGANIZATION
8334	H2AC6	H2A clustered histone 6 [Source:HGNC Symbol;Acc:HGNC:4733]	GOBP_NEGATIVE_REGULATION_OF_NUCLEOBASE_CONTAINING_COMPOUND_METABOLIC_PROCESS	GOBP_NEGATIVE_REGULATION_OF_BIOSYNTHETIC_PROCESS	GOBP_CHROMOSOME_ORGANIZATION	GOBP_CHROMATIN_ORGANIZATION_INVOLVED_IN_REGULATION_OF_TRANSCRIPTION		GOBP_CHROMATIN_ORGANIZATION	GOBP_NEGATIVE_REGULATION_OF_GENE_EXPRESSION_EPIGENETIC						GOBP_REGULATION_OF_GENE_EXPRESSION_EPIGENETIC			GOBP_NEGATIVE_REGULATION_OF_GENE_EXPRESSION
8338	H2AC20	H2A clustered histone 20 [Source:HGNC Symbol;Acc:HGNC:4738]	GOBP_NEGATIVE_REGULATION_OF_NUCLEOBASE_CONTAINING_COMPOUND_METABOLIC_PROCESS	GOBP_NEGATIVE_REGULATION_OF_BIOSYNTHETIC_PROCESS	GOBP_CHROMOSOME_ORGANIZATION	GOBP_CHROMATIN_ORGANIZATION_INVOLVED_IN_REGULATION_OF_TRANSCRIPTION		GOBP_CHROMATIN_ORGANIZATION	GOBP_NEGATIVE_REGULATION_OF_GENE_EXPRESSION_EPIGENETIC						GOBP_REGULATION_OF_GENE_EXPRESSION_EPIGENETIC			GOBP_NEGATIVE_REGULATION_OF_GENE_EXPRESSION
4017	LOXL2	lysyl oxidase like 2 [Source:HGNC Symbol;Acc:HGNC:6666]	GOBP_NEGATIVE_REGULATION_OF_NUCLEOBASE_CONTAINING_COMPOUND_METABOLIC_PROCESS	GOBP_NEGATIVE_REGULATION_OF_BIOSYNTHETIC_PROCESS	GOBP_CHROMOSOME_ORGANIZATION		GOBP_HETEROCHROMATIN_ORGANIZATION	GOBP_CHROMATIN_ORGANIZATION																																		GOBP_REGULATION_OF_MULTICELLULAR_ORGANISMAL_DEVELOPMENT
23028	KDM1A	lysine demethylase 1A [Source:HGNC Symbol;Acc:HGNC:29079]	GOBP_NEGATIVE_REGULATION_OF_NUCLEOBASE_CONTAINING_COMPOUND_METABOLIC_PROCESS	GOBP_NEGATIVE_REGULATION_OF_BIOSYNTHETIC_PROCESS	GOBP_CHROMOSOME_ORGANIZATION			GOBP_CHROMATIN_ORGANIZATION		GOBP_DNA_METABOLIC_PROCESS			GOBP_RNA_SPLICING						GOBP_MRNA_PROCESSING	GOBP_CELLULAR_RESPONSE_TO_DNA_DAMAGE_STIMULUS		GOBP_RNA_SPLICING_VIA_TRANSESTERIFICATION_REACTIONS													GOBP_MRNA_METABOLIC_PROCESS							GOBP_REGULATION_OF_MULTICELLULAR_ORGANISMAL_DEVELOPMENT					GOBP_NEGATIVE_REGULATION_OF_MOLECULAR_FUNCTION
9730	DCAF1	DDB1 and CUL4 associated factor 1 [Source:HGNC Symbol;Acc:HGNC:30911]	GOBP_NEGATIVE_REGULATION_OF_NUCLEOBASE_CONTAINING_COMPOUND_METABOLIC_PROCESS	GOBP_NEGATIVE_REGULATION_OF_BIOSYNTHETIC_PROCESS	GOBP_CHROMOSOME_ORGANIZATION			GOBP_CHROMATIN_ORGANIZATION		GOBP_DNA_METABOLIC_PROCESS																								GOBP_IMMUNE_SYSTEM_DEVELOPMENT										GOBP_BIOLOGICAL_PROCESS_INVOLVED_IN_SYMBIOTIC_INTERACTION
3178	HNRNPA1	heterogeneous nuclear ribonucleoprotein A1 [Source:HGNC Symbol;Acc:HGNC:5031]	GOBP_NEGATIVE_REGULATION_OF_NUCLEOBASE_CONTAINING_COMPOUND_METABOLIC_PROCESS	GOBP_NEGATIVE_REGULATION_OF_BIOSYNTHETIC_PROCESS	GOBP_CHROMOSOME_ORGANIZATION					GOBP_DNA_METABOLIC_PROCESS			GOBP_RNA_SPLICING						GOBP_MRNA_PROCESSING		GOBP_TELOMERE_ORGANIZATION	GOBP_RNA_SPLICING_VIA_TRANSESTERIFICATION_REACTIONS													GOBP_MRNA_METABOLIC_PROCESS									GOBP_BIOLOGICAL_PROCESS_INVOLVED_IN_SYMBIOTIC_INTERACTION					GOBP_REGULATION_OF_RNA_SPLICING
1063	CENPF	centromere protein F [Source:HGNC Symbol;Acc:HGNC:1857]	GOBP_NEGATIVE_REGULATION_OF_NUCLEOBASE_CONTAINING_COMPOUND_METABOLIC_PROCESS	GOBP_NEGATIVE_REGULATION_OF_BIOSYNTHETIC_PROCESS	GOBP_CHROMOSOME_ORGANIZATION					GOBP_DNA_METABOLIC_PROCESS																		GOBP_CENTROMERE_COMPLEX_ASSEMBLY				GOBP_PROTEIN_DNA_COMPLEX_SUBUNIT_ORGANIZATION					GOBP_CELL_CYCLE	GOBP_CELL_DIVISION			GOBP_PROTEIN_CONTAINING_COMPLEX_SUBUNIT_ORGANIZATION				GOBP_CELL_CYCLE_PROCESS
27086	FOXP1	forkhead box P1 [Source:HGNC Symbol;Acc:HGNC:3823]	GOBP_NEGATIVE_REGULATION_OF_NUCLEOBASE_CONTAINING_COMPOUND_METABOLIC_PROCESS	GOBP_NEGATIVE_REGULATION_OF_BIOSYNTHETIC_PROCESS										GOBP_MYELOID_CELL_DIFFERENTIATION				GOBP_NEGATIVE_REGULATION_OF_GENE_EXPRESSION		GOBP_CELLULAR_RESPONSE_TO_DNA_DAMAGE_STIMULUS						GOBP_REGULATION_OF_MYELOID_CELL_DIFFERENTIATION								GOBP_IMMUNE_SYSTEM_DEVELOPMENT					GOBP_REGULATION_OF_HEMOPOIESIS			GOBP_REGULATION_OF_MULTICELLULAR_ORGANISMAL_DEVELOPMENT
54625	PARP14	poly(ADP-ribose) polymerase family member 14 [Source:HGNC Symbol;Acc:HGNC:29232]	GOBP_NEGATIVE_REGULATION_OF_NUCLEOBASE_CONTAINING_COMPOUND_METABOLIC_PROCESS	GOBP_NEGATIVE_REGULATION_OF_BIOSYNTHETIC_PROCESS														GOBP_NEGATIVE_REGULATION_OF_GENE_EXPRESSION
138151	NACC2	NACC family member 2 [Source:HGNC Symbol;Acc:HGNC:23846]	GOBP_NEGATIVE_REGULATION_OF_NUCLEOBASE_CONTAINING_COMPOUND_METABOLIC_PROCESS	GOBP_NEGATIVE_REGULATION_OF_BIOSYNTHETIC_PROCESS																GOBP_CELLULAR_RESPONSE_TO_DNA_DAMAGE_STIMULUS																	GOBP_CELL_CYCLE				GOBP_PROTEIN_CONTAINING_COMPLEX_SUBUNIT_ORGANIZATION				GOBP_CELL_CYCLE_PROCESS
9994	CASP8AP2	caspase 8 associated protein 2 [Source:HGNC Symbol;Acc:HGNC:1510]	GOBP_NEGATIVE_REGULATION_OF_NUCLEOBASE_CONTAINING_COMPOUND_METABOLIC_PROCESS	GOBP_NEGATIVE_REGULATION_OF_BIOSYNTHETIC_PROCESS																																	GOBP_CELL_CYCLE
4188	MDFI	MyoD family inhibitor [Source:HGNC Symbol;Acc:HGNC:6967]	GOBP_NEGATIVE_REGULATION_OF_NUCLEOBASE_CONTAINING_COMPOUND_METABOLIC_PROCESS	GOBP_NEGATIVE_REGULATION_OF_BIOSYNTHETIC_PROCESS																																											GOBP_NEGATIVE_REGULATION_OF_MOLECULAR_FUNCTION
8725	URI1	URI1 prefoldin like chaperone [Source:HGNC Symbol;Acc:HGNC:13236]	GOBP_NEGATIVE_REGULATION_OF_NUCLEOBASE_CONTAINING_COMPOUND_METABOLIC_PROCESS	GOBP_NEGATIVE_REGULATION_OF_BIOSYNTHETIC_PROCESS																																											GOBP_NEGATIVE_REGULATION_OF_MOLECULAR_FUNCTION
53335	BCL11A	BAF chromatin remodeling complex subunit BCL11A [Source:HGNC Symbol;Acc:HGNC:13221]	GOBP_NEGATIVE_REGULATION_OF_NUCLEOBASE_CONTAINING_COMPOUND_METABOLIC_PROCESS	GOBP_NEGATIVE_REGULATION_OF_BIOSYNTHETIC_PROCESS
4664	NAB1	NGFI-A binding protein 1 [Source:HGNC Symbol;Acc:HGNC:7626]	GOBP_NEGATIVE_REGULATION_OF_NUCLEOBASE_CONTAINING_COMPOUND_METABOLIC_PROCESS	GOBP_NEGATIVE_REGULATION_OF_BIOSYNTHETIC_PROCESS
3068	HDGF	heparin binding growth factor [Source:HGNC Symbol;Acc:HGNC:4856]	GOBP_NEGATIVE_REGULATION_OF_NUCLEOBASE_CONTAINING_COMPOUND_METABOLIC_PROCESS	GOBP_NEGATIVE_REGULATION_OF_BIOSYNTHETIC_PROCESS
2956	MSH6	mutS homolog 6 [Source:HGNC Symbol;Acc:HGNC:7329]	GOBP_NEGATIVE_REGULATION_OF_NUCLEOBASE_CONTAINING_COMPOUND_METABOLIC_PROCESS							GOBP_DNA_METABOLIC_PROCESS										GOBP_CELLULAR_RESPONSE_TO_DNA_DAMAGE_STIMULUS														GOBP_IMMUNE_SYSTEM_DEVELOPMENT			GOBP_CELL_CYCLE							GOBP_BIOLOGICAL_PROCESS_INVOLVED_IN_SYMBIOTIC_INTERACTION	GOBP_CELL_CYCLE_PROCESS
27316	RBMX	RNA binding motif protein X-linked [Source:HGNC Symbol;Acc:HGNC:9910]	GOBP_NEGATIVE_REGULATION_OF_NUCLEOBASE_CONTAINING_COMPOUND_METABOLIC_PROCESS										GOBP_RNA_SPLICING					GOBP_NEGATIVE_REGULATION_OF_GENE_EXPRESSION	GOBP_MRNA_PROCESSING			GOBP_RNA_SPLICING_VIA_TRANSESTERIFICATION_REACTIONS													GOBP_MRNA_METABOLIC_PROCESS						GOBP_PROTEIN_CONTAINING_COMPLEX_SUBUNIT_ORGANIZATION								GOBP_REGULATION_OF_RNA_SPLICING
26986	PABPC1	poly(A) binding protein cytoplasmic 1 [Source:HGNC Symbol;Acc:HGNC:8554]	GOBP_NEGATIVE_REGULATION_OF_NUCLEOBASE_CONTAINING_COMPOUND_METABOLIC_PROCESS										GOBP_RNA_SPLICING					GOBP_NEGATIVE_REGULATION_OF_GENE_EXPRESSION	GOBP_MRNA_PROCESSING			GOBP_RNA_SPLICING_VIA_TRANSESTERIFICATION_REACTIONS													GOBP_MRNA_METABOLIC_PROCESS									GOBP_BIOLOGICAL_PROCESS_INVOLVED_IN_SYMBIOTIC_INTERACTION				GOBP_POSTTRANSCRIPTIONAL_REGULATION_OF_GENE_EXPRESSION
55294	FBXW7	F-box and WD repeat domain containing 7 [Source:HGNC Symbol;Acc:HGNC:16712]		GOBP_NEGATIVE_REGULATION_OF_BIOSYNTHETIC_PROCESS	GOBP_CHROMOSOME_ORGANIZATION									GOBP_MYELOID_CELL_DIFFERENTIATION				GOBP_NEGATIVE_REGULATION_OF_GENE_EXPRESSION								GOBP_REGULATION_OF_MYELOID_CELL_DIFFERENTIATION								GOBP_IMMUNE_SYSTEM_DEVELOPMENT			GOBP_CELL_CYCLE		GOBP_REGULATION_OF_HEMOPOIESIS			GOBP_REGULATION_OF_MULTICELLULAR_ORGANISMAL_DEVELOPMENT		GOBP_BIOLOGICAL_PROCESS_INVOLVED_IN_SYMBIOTIC_INTERACTION	GOBP_CELL_CYCLE_PROCESS		GOBP_NEGATIVE_REGULATION_OF_MOLECULAR_FUNCTION
1719	DHFR	dihydrofolate reductase [Source:HGNC Symbol;Acc:HGNC:2861]		GOBP_NEGATIVE_REGULATION_OF_BIOSYNTHETIC_PROCESS														GOBP_NEGATIVE_REGULATION_OF_GENE_EXPRESSION																			GOBP_CELL_CYCLE								GOBP_CELL_CYCLE_PROCESS			GOBP_POSTTRANSCRIPTIONAL_REGULATION_OF_GENE_EXPRESSION
348	APOE	apolipoprotein E [Source:HGNC Symbol;Acc:HGNC:613]		GOBP_NEGATIVE_REGULATION_OF_BIOSYNTHETIC_PROCESS														GOBP_NEGATIVE_REGULATION_OF_GENE_EXPRESSION																							GOBP_PROTEIN_CONTAINING_COMPLEX_SUBUNIT_ORGANIZATION			GOBP_BIOLOGICAL_PROCESS_INVOLVED_IN_SYMBIOTIC_INTERACTION			GOBP_NEGATIVE_REGULATION_OF_MOLECULAR_FUNCTION
55337	SHFL	shiftless antiviral inhibitor of ribosomal frameshifting [Source:HGNC Symbol;Acc:HGNC:25649]		GOBP_NEGATIVE_REGULATION_OF_BIOSYNTHETIC_PROCESS														GOBP_NEGATIVE_REGULATION_OF_GENE_EXPRESSION																							GOBP_PROTEIN_CONTAINING_COMPLEX_SUBUNIT_ORGANIZATION			GOBP_BIOLOGICAL_PROCESS_INVOLVED_IN_SYMBIOTIC_INTERACTION				GOBP_POSTTRANSCRIPTIONAL_REGULATION_OF_GENE_EXPRESSION
6594	SMARCA1	SWI/SNF related, matrix associated, actin dependent regulator of chromatin, subfamily a, member 1 [Source:HGNC Symbol;Acc:HGNC:11097]			GOBP_CHROMOSOME_ORGANIZATION			GOBP_CHROMATIN_ORGANIZATION		GOBP_DNA_METABOLIC_PROCESS	GOBP_ATP_DEPENDENT_CHROMATIN_REMODELING					GOBP_CHROMATIN_REMODELING														GOBP_DNA_CONFORMATION_CHANGE
57082	KNL1	kinetochore scaffold 1 [Source:HGNC Symbol;Acc:HGNC:24054]			GOBP_CHROMOSOME_ORGANIZATION			GOBP_CHROMATIN_ORGANIZATION			GOBP_ATP_DEPENDENT_CHROMATIN_REMODELING					GOBP_CHROMATIN_REMODELING							GOBP_DNA_PACKAGING		GOBP_NUCLEOSOME_ORGANIZATION			GOBP_CENTROMERE_COMPLEX_ASSEMBLY	GOBP_NUCLEOSOME_ASSEMBLY	GOBP_DNA_CONFORMATION_CHANGE	GOBP_HISTONE_EXCHANGE	GOBP_PROTEIN_DNA_COMPLEX_SUBUNIT_ORGANIZATION				GOBP_CHROMATIN_ASSEMBLY_OR_DISASSEMBLY	GOBP_CELL_CYCLE	GOBP_CELL_DIVISION			GOBP_PROTEIN_CONTAINING_COMPLEX_SUBUNIT_ORGANIZATION				GOBP_CELL_CYCLE_PROCESS	GOBP_CHROMATIN_REMODELING_AT_CENTROMERE	GOBP_NEGATIVE_REGULATION_OF_MOLECULAR_FUNCTION
81611	ANP32E	acidic nuclear phosphoprotein 32 family member E [Source:HGNC Symbol;Acc:HGNC:16673]			GOBP_CHROMOSOME_ORGANIZATION			GOBP_CHROMATIN_ORGANIZATION			GOBP_ATP_DEPENDENT_CHROMATIN_REMODELING					GOBP_CHROMATIN_REMODELING									GOBP_NUCLEOSOME_ORGANIZATION						GOBP_HISTONE_EXCHANGE	GOBP_PROTEIN_DNA_COMPLEX_SUBUNIT_ORGANIZATION									GOBP_PROTEIN_CONTAINING_COMPLEX_SUBUNIT_ORGANIZATION						GOBP_NEGATIVE_REGULATION_OF_MOLECULAR_FUNCTION
23210	JMJD6	jumonji domain containing 6, arginine demethylase and lysine hydroxylase [Source:HGNC Symbol;Acc:HGNC:19355]			GOBP_CHROMOSOME_ORGANIZATION			GOBP_CHROMATIN_ORGANIZATION					GOBP_RNA_SPLICING	GOBP_MYELOID_CELL_DIFFERENTIATION					GOBP_MRNA_PROCESSING			GOBP_RNA_SPLICING_VIA_TRANSESTERIFICATION_REACTIONS												GOBP_IMMUNE_SYSTEM_DEVELOPMENT	GOBP_MRNA_METABOLIC_PROCESS						GOBP_PROTEIN_CONTAINING_COMPLEX_SUBUNIT_ORGANIZATION								GOBP_REGULATION_OF_RNA_SPLICING
54620	FBXL19	F-box and leucine rich repeat protein 19 [Source:HGNC Symbol;Acc:HGNC:25300]			GOBP_CHROMOSOME_ORGANIZATION			GOBP_CHROMATIN_ORGANIZATION
23137	SMC5	structural maintenance of chromosomes 5 [Source:HGNC Symbol;Acc:HGNC:20465]			GOBP_CHROMOSOME_ORGANIZATION					GOBP_DNA_METABOLIC_PROCESS										GOBP_CELLULAR_RESPONSE_TO_DNA_DAMAGE_STIMULUS	GOBP_TELOMERE_ORGANIZATION		GOBP_DNA_PACKAGING							GOBP_DNA_CONFORMATION_CHANGE							GOBP_CELL_CYCLE	GOBP_CELL_DIVISION							GOBP_CELL_CYCLE_PROCESS
9985	REC8	REC8 meiotic recombination protein [Source:HGNC Symbol;Acc:HGNC:16879]			GOBP_CHROMOSOME_ORGANIZATION					GOBP_DNA_METABOLIC_PROCESS										GOBP_CELLULAR_RESPONSE_TO_DNA_DAMAGE_STIMULUS																	GOBP_CELL_CYCLE								GOBP_CELL_CYCLE_PROCESS
4751	NEK2	NIMA related kinase 2 [Source:HGNC Symbol;Acc:HGNC:7745]			GOBP_CHROMOSOME_ORGANIZATION					GOBP_DNA_METABOLIC_PROCESS											GOBP_TELOMERE_ORGANIZATION																GOBP_CELL_CYCLE	GOBP_CELL_DIVISION							GOBP_CELL_CYCLE_PROCESS		GOBP_NEGATIVE_REGULATION_OF_MOLECULAR_FUNCTION
9636	ISG15	ISG15 ubiquitin like modifier [Source:HGNC Symbol;Acc:HGNC:4053]								GOBP_DNA_METABOLIC_PROCESS				GOBP_MYELOID_CELL_DIFFERENTIATION				GOBP_NEGATIVE_REGULATION_OF_GENE_EXPRESSION		GOBP_CELLULAR_RESPONSE_TO_DNA_DAMAGE_STIMULUS						GOBP_REGULATION_OF_MYELOID_CELL_DIFFERENTIATION								GOBP_IMMUNE_SYSTEM_DEVELOPMENT					GOBP_REGULATION_OF_HEMOPOIESIS			GOBP_REGULATION_OF_MULTICELLULAR_ORGANISMAL_DEVELOPMENT		GOBP_BIOLOGICAL_PROCESS_INVOLVED_IN_SYMBIOTIC_INTERACTION
7027	TFDP1	transcription factor Dp-1 [Source:HGNC Symbol;Acc:HGNC:11749]								GOBP_DNA_METABOLIC_PROCESS										GOBP_CELLULAR_RESPONSE_TO_DNA_DAMAGE_STIMULUS																	GOBP_CELL_CYCLE								GOBP_CELL_CYCLE_PROCESS
80010	RMI1	RecQ mediated genome instability 1 [Source:HGNC Symbol;Acc:HGNC:25764]								GOBP_DNA_METABOLIC_PROCESS										GOBP_CELLULAR_RESPONSE_TO_DNA_DAMAGE_STIMULUS																	GOBP_CELL_CYCLE								GOBP_CELL_CYCLE_PROCESS
6917	TCEA1	transcription elongation factor A1 [Source:HGNC Symbol;Acc:HGNC:11612]								GOBP_DNA_METABOLIC_PROCESS										GOBP_CELLULAR_RESPONSE_TO_DNA_DAMAGE_STIMULUS
286826	LIN9	lin-9 DREAM MuvB core complex component [Source:HGNC Symbol;Acc:HGNC:30830]								GOBP_DNA_METABOLIC_PROCESS																											GOBP_CELL_CYCLE
23451	SF3B1	splicing factor 3b subunit 1 [Source:HGNC Symbol;Acc:HGNC:10768]											GOBP_RNA_SPLICING		GOBP_REGULATION_OF_GENE_EXPRESSION_EPIGENETIC				GOBP_MRNA_PROCESSING			GOBP_RNA_SPLICING_VIA_TRANSESTERIFICATION_REACTIONS													GOBP_MRNA_METABOLIC_PROCESS						GOBP_PROTEIN_CONTAINING_COMPLEX_SUBUNIT_ORGANIZATION
10521	DDX17	DEAD-box helicase 17 [Source:HGNC Symbol;Acc:HGNC:2740]											GOBP_RNA_SPLICING					GOBP_NEGATIVE_REGULATION_OF_GENE_EXPRESSION	GOBP_MRNA_PROCESSING			GOBP_RNA_SPLICING_VIA_TRANSESTERIFICATION_REACTIONS													GOBP_MRNA_METABOLIC_PROCESS														GOBP_REGULATION_OF_RNA_SPLICING
11168	PSIP1	PC4 and SFRS1 interacting protein 1 [Source:HGNC Symbol;Acc:HGNC:9527]											GOBP_RNA_SPLICING						GOBP_MRNA_PROCESSING			GOBP_RNA_SPLICING_VIA_TRANSESTERIFICATION_REACTIONS													GOBP_MRNA_METABOLIC_PROCESS						GOBP_PROTEIN_CONTAINING_COMPLEX_SUBUNIT_ORGANIZATION			GOBP_BIOLOGICAL_PROCESS_INVOLVED_IN_SYMBIOTIC_INTERACTION
5935	RBM3	RNA binding motif protein 3 [Source:HGNC Symbol;Acc:HGNC:9900]											GOBP_RNA_SPLICING						GOBP_MRNA_PROCESSING			GOBP_RNA_SPLICING_VIA_TRANSESTERIFICATION_REACTIONS													GOBP_MRNA_METABOLIC_PROCESS													GOBP_POSTTRANSCRIPTIONAL_REGULATION_OF_GENE_EXPRESSION	GOBP_REGULATION_OF_RNA_SPLICING
494115	RBMXL1	RBMX like 1 [Source:HGNC Symbol;Acc:HGNC:25073]											GOBP_RNA_SPLICING						GOBP_MRNA_PROCESSING			GOBP_RNA_SPLICING_VIA_TRANSESTERIFICATION_REACTIONS													GOBP_MRNA_METABOLIC_PROCESS														GOBP_REGULATION_OF_RNA_SPLICING
84991	RBM17	RNA binding motif protein 17 [Source:HGNC Symbol;Acc:HGNC:16944]											GOBP_RNA_SPLICING						GOBP_MRNA_PROCESSING			GOBP_RNA_SPLICING_VIA_TRANSESTERIFICATION_REACTIONS													GOBP_MRNA_METABOLIC_PROCESS
51634	RBMX2	RNA binding motif protein X-linked 2 [Source:HGNC Symbol;Acc:HGNC:24282]											GOBP_RNA_SPLICING						GOBP_MRNA_PROCESSING			GOBP_RNA_SPLICING_VIA_TRANSESTERIFICATION_REACTIONS													GOBP_MRNA_METABOLIC_PROCESS
23076	RRP1B	ribosomal RNA processing 1B [Source:HGNC Symbol;Acc:HGNC:23818]											GOBP_RNA_SPLICING						GOBP_MRNA_PROCESSING																GOBP_MRNA_METABOLIC_PROCESS									GOBP_BIOLOGICAL_PROCESS_INVOLVED_IN_SYMBIOTIC_INTERACTION			GOBP_NEGATIVE_REGULATION_OF_MOLECULAR_FUNCTION		GOBP_REGULATION_OF_RNA_SPLICING
285672	SREK1IP1	SREK1 interacting protein 1 [Source:HGNC Symbol;Acc:HGNC:26716]											GOBP_RNA_SPLICING						GOBP_MRNA_PROCESSING																GOBP_MRNA_METABOLIC_PROCESS
8761	PABPC4	poly(A) binding protein cytoplasmic 4 [Source:HGNC Symbol;Acc:HGNC:8557]												GOBP_MYELOID_CELL_DIFFERENTIATION				GOBP_NEGATIVE_REGULATION_OF_GENE_EXPRESSION																GOBP_IMMUNE_SYSTEM_DEVELOPMENT	GOBP_MRNA_METABOLIC_PROCESS													GOBP_POSTTRANSCRIPTIONAL_REGULATION_OF_GENE_EXPRESSION
3930	LBR	lamin B receptor [Source:HGNC Symbol;Acc:HGNC:6518]												GOBP_MYELOID_CELL_DIFFERENTIATION																				GOBP_IMMUNE_SYSTEM_DEVELOPMENT
9818	NUP58	nucleoporin 58 [Source:HGNC Symbol;Acc:HGNC:20261]																GOBP_NEGATIVE_REGULATION_OF_GENE_EXPRESSION									GOBP_REGULATION_OF_GENE_SILENCING													GOBP_REGULATION_OF_GENE_SILENCING_BY_RNA				GOBP_BIOLOGICAL_PROCESS_INVOLVED_IN_SYMBIOTIC_INTERACTION				GOBP_POSTTRANSCRIPTIONAL_REGULATION_OF_GENE_EXPRESSION
407975	MIR17HG	miR-17-92a-1 cluster host gene [Source:HGNC Symbol;Acc:HGNC:23564]																GOBP_NEGATIVE_REGULATION_OF_GENE_EXPRESSION																GOBP_IMMUNE_SYSTEM_DEVELOPMENT					GOBP_REGULATION_OF_HEMOPOIESIS			GOBP_REGULATION_OF_MULTICELLULAR_ORGANISMAL_DEVELOPMENT						GOBP_POSTTRANSCRIPTIONAL_REGULATION_OF_GENE_EXPRESSION
6124	RPL4	ribosomal protein L4 [Source:HGNC Symbol;Acc:HGNC:10353]																GOBP_NEGATIVE_REGULATION_OF_GENE_EXPRESSION																	GOBP_MRNA_METABOLIC_PROCESS									GOBP_BIOLOGICAL_PROCESS_INVOLVED_IN_SYMBIOTIC_INTERACTION
995	CDC25C	cell division cycle 25C [Source:HGNC Symbol;Acc:HGNC:1727]																		GOBP_CELLULAR_RESPONSE_TO_DNA_DAMAGE_STIMULUS																	GOBP_CELL_CYCLE	GOBP_CELL_DIVISION						GOBP_BIOLOGICAL_PROCESS_INVOLVED_IN_SYMBIOTIC_INTERACTION	GOBP_CELL_CYCLE_PROCESS
1820	ARID3A	AT-rich interaction domain 3A [Source:HGNC Symbol;Acc:HGNC:3031]																		GOBP_CELLULAR_RESPONSE_TO_DNA_DAMAGE_STIMULUS																	GOBP_CELL_CYCLE								GOBP_CELL_CYCLE_PROCESS
138162	C9orf116	chromosome 9 open reading frame 116 [Source:HGNC Symbol;Acc:HGNC:28435]																		GOBP_CELLULAR_RESPONSE_TO_DNA_DAMAGE_STIMULUS
9133	CCNB2	cyclin B2 [Source:HGNC Symbol;Acc:HGNC:1580]																																GOBP_IMMUNE_SYSTEM_DEVELOPMENT			GOBP_CELL_CYCLE	GOBP_CELL_DIVISION							GOBP_CELL_CYCLE_PROCESS
126731	CCSAP	centriole, cilia and spindle associated protein [Source:HGNC Symbol;Acc:HGNC:29578]																																			GOBP_CELL_CYCLE	GOBP_CELL_DIVISION			GOBP_PROTEIN_CONTAINING_COMPLEX_SUBUNIT_ORGANIZATION	GOBP_REGULATION_OF_MULTICELLULAR_ORGANISMAL_DEVELOPMENT			GOBP_CELL_CYCLE_PROCESS
54801	HAUS6	HAUS augmin like complex subunit 6 [Source:HGNC Symbol;Acc:HGNC:25948]																																			GOBP_CELL_CYCLE	GOBP_CELL_DIVISION							GOBP_CELL_CYCLE_PROCESS
403	ARL 3.00	ADP ribosylation factor like GTPase 3 [Source:HGNC Symbol;Acc:HGNC:694]																																			GOBP_CELL_CYCLE	GOBP_CELL_DIVISION							GOBP_CELL_CYCLE_PROCESS
259266	ASPM	assembly factor for spindle microtubules [Source:HGNC Symbol;Acc:HGNC:19048]																																			GOBP_CELL_CYCLE	GOBP_CELL_DIVISION							GOBP_CELL_CYCLE_PROCESS
348235	SKA2	spindle and kinetochore associated complex subunit 2 [Source:HGNC Symbol;Acc:HGNC:28006]																																			GOBP_CELL_CYCLE	GOBP_CELL_DIVISION
143384	CACUL1	CDK2 associated cullin domain 1 [Source:HGNC Symbol;Acc:HGNC:23727]																																			GOBP_CELL_CYCLE								GOBP_CELL_CYCLE_PROCESS
5597	MAPK6	mitogen-activated protein kinase 6 [Source:HGNC Symbol;Acc:HGNC:6879]																																			GOBP_CELL_CYCLE
23111	SPART	spartin [Source:HGNC Symbol;Acc:HGNC:18514]																																				GOBP_CELL_DIVISION				GOBP_REGULATION_OF_MULTICELLULAR_ORGANISMAL_DEVELOPMENT
847	CAT	catalase [Source:HGNC Symbol;Acc:HGNC:1516]																																				GOBP_CELL_DIVISION									GOBP_NEGATIVE_REGULATION_OF_MOLECULAR_FUNCTION
154	ADRB2	adrenoceptor beta 2 [Source:HGNC Symbol;Acc:HGNC:286]																																							GOBP_PROTEIN_CONTAINING_COMPLEX_SUBUNIT_ORGANIZATION	GOBP_REGULATION_OF_MULTICELLULAR_ORGANISMAL_DEVELOPMENT					GOBP_NEGATIVE_REGULATION_OF_MOLECULAR_FUNCTION
1854	DUT	deoxyuridine triphosphatase [Source:HGNC Symbol;Acc:HGNC:3078]																																							GOBP_PROTEIN_CONTAINING_COMPLEX_SUBUNIT_ORGANIZATION						GOBP_NEGATIVE_REGULATION_OF_MOLECULAR_FUNCTION
1975	EIF4B	eukaryotic translation initiation factor 4B [Source:HGNC Symbol;Acc:HGNC:3285]																																							GOBP_PROTEIN_CONTAINING_COMPLEX_SUBUNIT_ORGANIZATION							GOBP_POSTTRANSCRIPTIONAL_REGULATION_OF_GENE_EXPRESSION
11222	MRPL3	mitochondrial ribosomal protein L3 [Source:HGNC Symbol;Acc:HGNC:10379]																																							GOBP_PROTEIN_CONTAINING_COMPLEX_SUBUNIT_ORGANIZATION
2048	EPHB2	EPH receptor B2 [Source:HGNC Symbol;Acc:HGNC:3393]																																								GOBP_REGULATION_OF_MULTICELLULAR_ORGANISMAL_DEVELOPMENT					GOBP_NEGATIVE_REGULATION_OF_MOLECULAR_FUNCTION
3418	IDH2	isocitrate dehydrogenase (NADP(+)) 2 [Source:HGNC Symbol;Acc:HGNC:5383]																																								GOBP_REGULATION_OF_MULTICELLULAR_ORGANISMAL_DEVELOPMENT
2803	GOLGA4	golgin A4 [Source:HGNC Symbol;Acc:HGNC:4427]																																								GOBP_REGULATION_OF_MULTICELLULAR_ORGANISMAL_DEVELOPMENT
2192	FBLN1	fibulin 1 [Source:HGNC Symbol;Acc:HGNC:3600]																																										GOBP_BIOLOGICAL_PROCESS_INVOLVED_IN_SYMBIOTIC_INTERACTION
665	BNIP3L	BCL2 interacting protein 3 like [Source:HGNC Symbol;Acc:HGNC:1085]																																										GOBP_BIOLOGICAL_PROCESS_INVOLVED_IN_SYMBIOTIC_INTERACTION
27347	STK39	serine/threonine kinase 39 [Source:HGNC Symbol;Acc:HGNC:17717]																																													GOBP_NEGATIVE_REGULATION_OF_MOLECULAR_FUNCTION
79007	DBNDD1	dysbindin domain containing 1 [Source:HGNC Symbol;Acc:HGNC:28455]																																													GOBP_NEGATIVE_REGULATION_OF_MOLECULAR_FUNCTION
25816	TNFAIP8	TNF alpha induced protein 8 [Source:HGNC Symbol;Acc:HGNC:17260]																																													GOBP_NEGATIVE_REGULATION_OF_MOLECULAR_FUNCTION
375484	SIMC1	SUMO interacting motifs containing 1 [Source:HGNC Symbol;Acc:HGNC:24779]																																													GOBP_NEGATIVE_REGULATION_OF_MOLECULAR_FUNCTION
8569	MKNK1	MAPK interacting serine/threonine kinase 1 [Source:HGNC Symbol;Acc:HGNC:7110]																																														GOBP_POSTTRANSCRIPTIONAL_REGULATION_OF_GENE_EXPRESSION
89978	DPH6	diphthamine biosynthesis 6 [Source:HGNC Symbol;Acc:HGNC:30543]																																														GOBP_POSTTRANSCRIPTIONAL_REGULATION_OF_GENE_EXPRESSION
9782	MATR3	matrin 3 [Source:HGNC Symbol;Acc:HGNC:6912]																																														GOBP_POSTTRANSCRIPTIONAL_REGULATION_OF_GENE_EXPRESSION
2218	FKTN	fukutin [Source:HGNC Symbol;Acc:HGNC:3622]
205	AK4	adenylate kinase 4 [Source:HGNC Symbol;Acc:HGNC:363]
4548	MTR	5-methyltetrahydrofolate-homocysteine methyltransferase [Source:HGNC Symbol;Acc:HGNC:7468]
7054	TH	tyrosine hydroxylase [Source:HGNC Symbol;Acc:HGNC:11782]
9672	SDC3	syndecan 3 [Source:HGNC Symbol;Acc:HGNC:10660]
64132	XYLT2	xylosyltransferase 2 [Source:HGNC Symbol;Acc:HGNC:15517]
283464	GXYLT1	glucoside xylosyltransferase 1 [Source:HGNC Symbol;Acc:HGNC:27482]
23216	TBC1D1	TBC1 domain family member 1 [Source:HGNC Symbol;Acc:HGNC:11578]
1122	CHML	CHM like Rab escort protein [Source:HGNC Symbol;Acc:HGNC:1941]
8443	GNPAT	glyceronephosphate O-acyltransferase [Source:HGNC Symbol;Acc:HGNC:4416]
8100	IFT88	intraflagellar transport 88 [Source:HGNC Symbol;Acc:HGNC:20606]
79989	TTC26	tetratricopeptide repeat domain 26 [Source:HGNC Symbol;Acc:HGNC:21882]
64854	USP46	ubiquitin specific peptidase 46 [Source:HGNC Symbol;Acc:HGNC:20075]
55327	LIN7C	lin-7 homolog C, crumbs cell polarity complex component [Source:HGNC Symbol;Acc:HGNC:17789]
80223	RAB11FIP1	RAB11 family interacting protein 1 [Source:HGNC Symbol;Acc:HGNC:30265]
4854	NOTCH3	notch receptor 3 [Source:HGNC Symbol;Acc:HGNC:7883]
154743	BMT2	base methyltransferase of 25S rRNA 2 homolog [Source:HGNC Symbol;Acc:HGNC:26475]
3895	KTN1	kinectin 1 [Source:HGNC Symbol;Acc:HGNC:6467]
57691	KIAA1586	KIAA1586 [Source:HGNC Symbol;Acc:HGNC:21360]
2287	FKBP3	FKBP prolyl isomerase 3 [Source:HGNC Symbol;Acc:HGNC:3719]
8503	PIK3R3	phosphoinositide-3-kinase regulatory subunit 3 [Source:HGNC Symbol;Acc:HGNC:8981]
7064	THOP1	thimet oligopeptidase 1 [Source:HGNC Symbol;Acc:HGNC:11793]
10396	ATP8A1	ATPase phospholipid transporting 8A1 [Source:HGNC Symbol;Acc:HGNC:13531]
148229	ATP8B3	ATPase phospholipid transporting 8B3 [Source:HGNC Symbol;Acc:HGNC:13535]
23306	NEMP1	nuclear envelope integral membrane protein 1 [Source:HGNC Symbol;Acc:HGNC:29001]
54809	SAMD9	sterile alpha motif domain containing 9 [Source:HGNC Symbol;Acc:HGNC:1348]
4357	MPST	mercaptopyruvate sulfurtransferase [Source:HGNC Symbol;Acc:HGNC:7223]
10622	POLR3G	RNA polymerase III subunit G [Source:HGNC Symbol;Acc:HGNC:30075]
283431	GAS2L3	growth arrest specific 2 like 3 [Source:HGNC Symbol;Acc:HGNC:27475]
5757	PTMA	prothymosin alpha [Source:HGNC Symbol;Acc:HGNC:9623]
54764	ZRANB1	zinc finger RANBP2-type containing 1 [Source:HGNC Symbol;Acc:HGNC:18224]
9508	ADAMTS3	ADAM metallopeptidase with thrombospondin type 1 motif 3 [Source:HGNC Symbol;Acc:HGNC:219]
6398	SECTM1	secreted and transmembrane 1 [Source:HGNC Symbol;Acc:HGNC:10707]
230	ALDOC	aldolase, fructose-bisphosphate C [Source:HGNC Symbol;Acc:HGNC:418]
57488	ESYT2	extended synaptotagmin 2 [Source:HGNC Symbol;Acc:HGNC:22211]
8497	PPFIA4	PTPRF interacting protein alpha 4 [Source:HGNC Symbol;Acc:HGNC:9248]
27247	NFU1	NFU1 iron-sulfur cluster scaffold [Source:HGNC Symbol;Acc:HGNC:16287]
768206	PRCD	photoreceptor disc component [Source:HGNC Symbol;Acc:HGNC:32528]
23155	CLCC1	chloride channel CLIC like 1 [Source:HGNC Symbol;Acc:HGNC:29675]
10198	MPHOSPH9	M-phase phosphoprotein 9 [Source:HGNC Symbol;Acc:HGNC:7215]
116254	GINM1	glycoprotein integral membrane 1 [Source:HGNC Symbol;Acc:HGNC:21074]
124808	CCDC43	coiled-coil domain containing 43 [Source:HGNC Symbol;Acc:HGNC:26472]
150946	GAREM2	GRB2 associated regulator of MAPK1 subtype 2 [Source:HGNC Symbol;Acc:HGNC:27172]
162073	ITPRIPL2	ITPRIP like 2 [Source:HGNC Symbol;Acc:HGNC:27257]
283337	ZNF740	zinc finger protein 740 [Source:HGNC Symbol;Acc:HGNC:27465]
283547	LINC00639	long intergenic non-protein coding RNA 639 [Source:HGNC Symbol;Acc:HGNC:27502]
57458	TMCC3	transmembrane and coiled-coil domain family 3 [Source:HGNC Symbol;Acc:HGNC:29199]
57594	HOMEZ	homeobox and leucine zipper encoding [Source:HGNC Symbol;Acc:HGNC:20164]
642968	FAM163B	family with sequence similarity 163 member B [Source:HGNC Symbol;Acc:HGNC:33277]
6452	SH3BP2	SH3 domain binding protein 2 [Source:HGNC Symbol;Acc:HGNC:10825]
84263	HSDL2	hydroxysteroid dehydrogenase like 2 [Source:HGNC Symbol;Acc:HGNC:18572]
90843	TCEAL8	transcription elongation factor A like 8 [Source:HGNC Symbol;Acc:HGNC:28683]
91057	CCDC34	coiled-coil domain containing 34 [Source:HGNC Symbol;Acc:HGNC:25079]
[truncated: 3 more columns]

## Sheet: Figure 3E Histones
Overlap Results
Collection(s):	CP:KEGG
# overlaps shown:	1
# genesets in collections:	186
# genes in comparison (n):	140
# genes in universe (N):	40312
Gene Set Name	# Genes in Gene Set (K)	Description	# Genes in Overlap (k)	k/K	p-value	FDR q-value
KEGG_SYSTEMIC_LUPUS_ERYTHEMATOSUS	139	Systemic lupus erythematosus	8	0.0576	3.32e-08	6.18e-06
Gene/Gene Set Overlap Matrix
Entrez Gene Id	Gene Symbol	Gene Description	KEGG_SYSTEMIC_LUPUS_ERYTHEMATOSUS
121504	H4-16	H4 histone 16 [Source:HGNC Symbol;Acc:HGNC:20510]	KEGG_SYSTEMIC_LUPUS_ERYTHEMATOSUS
8294	H4C9	H4 clustered histone 9 [Source:HGNC Symbol;Acc:HGNC:4793]	KEGG_SYSTEMIC_LUPUS_ERYTHEMATOSUS
8334	H2AC6	H2A clustered histone 6 [Source:HGNC Symbol;Acc:HGNC:4733]	KEGG_SYSTEMIC_LUPUS_ERYTHEMATOSUS
8338	H2AC20	H2A clustered histone 20 [Source:HGNC Symbol;Acc:HGNC:4738]	KEGG_SYSTEMIC_LUPUS_ERYTHEMATOSUS
8354	H3C11	H3 clustered histone 11 [Source:HGNC Symbol;Acc:HGNC:4771]	KEGG_SYSTEMIC_LUPUS_ERYTHEMATOSUS
8357	H3C10	H3 clustered histone 10 [Source:HGNC Symbol;Acc:HGNC:4775]	KEGG_SYSTEMIC_LUPUS_ERYTHEMATOSUS
8362	H4C12	H4 clustered histone 12 [Source:HGNC Symbol;Acc:HGNC:4784]	KEGG_SYSTEMIC_LUPUS_ERYTHEMATOSUS
8363	H4C11	H4 clustered histone 11 [Source:HGNC Symbol;Acc:HGNC:4785]	KEGG_SYSTEMIC_LUPUS_ERYTHEMATOSUS
9133	CCNB2	cyclin B2 [Source:HGNC Symbol;Acc:HGNC:1580]
995	CDC25C	cell division cycle 25C [Source:HGNC Symbol;Acc:HGNC:1727]
3065	HDAC1	histone deacetylase 1 [Source:HGNC Symbol;Acc:HGNC:4852]
7027	TFDP1	transcription factor Dp-1 [Source:HGNC Symbol;Acc:HGNC:11749]
23451	SF3B1	splicing factor 3b subunit 1 [Source:HGNC Symbol;Acc:HGNC:10768]
27316	RBMX	RNA binding motif protein X-linked [Source:HGNC Symbol;Acc:HGNC:9910]
3178	HNRNPA1	heterogeneous nuclear ribonucleoprotein A1 [Source:HGNC Symbol;Acc:HGNC:5031]
84991	RBM17	RNA binding motif protein 17 [Source:HGNC Symbol;Acc:HGNC:16944]
4548	MTR	5-methyltetrahydrofolate-homocysteine methyltransferase [Source:HGNC Symbol;Acc:HGNC:7468]
1719	DHFR	dihydrofolate reductase [Source:HGNC Symbol;Acc:HGNC:2861]
8443	GNPAT	glyceronephosphate O-acyltransferase [Source:HGNC Symbol;Acc:HGNC:4416]
847	CAT	catalase [Source:HGNC Symbol;Acc:HGNC:1516]
3418	IDH2	isocitrate dehydrogenase (NADP(+)) 2 [Source:HGNC Symbol;Acc:HGNC:5383]
8503	PIK3R3	phosphoinositide-3-kinase regulatory subunit 3 [Source:HGNC Symbol;Acc:HGNC:8981]
4357	MPST	mercaptopyruvate sulfurtransferase [Source:HGNC Symbol;Acc:HGNC:7223]
9985	REC8	REC8 meiotic recombination protein [Source:HGNC Symbol;Acc:HGNC:16879]
4854	NOTCH3	notch receptor 3 [Source:HGNC Symbol;Acc:HGNC:7883]
1975	EIF4B	eukaryotic translation initiation factor 4B [Source:HGNC Symbol;Acc:HGNC:3285]
2956	MSH6	mutS homolog 6 [Source:HGNC Symbol;Acc:HGNC:7329]
10622	POLR3G	RNA polymerase III subunit G [Source:HGNC Symbol;Acc:HGNC:30075]
1854	DUT	deoxyuridine triphosphatase [Source:HGNC Symbol;Acc:HGNC:3078]
8569	MKNK1	MAPK interacting serine/threonine kinase 1 [Source:HGNC Symbol;Acc:HGNC:7110]
6452	SH3BP2	SH3 domain binding protein 2 [Source:HGNC Symbol;Acc:HGNC:10825]
205	AK4	adenylate kinase 4 [Source:HGNC Symbol;Acc:HGNC:363]
154	ADRB2	adrenoceptor beta 2 [Source:HGNC Symbol;Acc:HGNC:286]
80223	RAB11FIP1	RAB11 family interacting protein 1 [Source:HGNC Symbol;Acc:HGNC:30265]
348	APOE	apolipoprotein E [Source:HGNC Symbol;Acc:HGNC:613]
55294	FBXW7	F-box and WD repeat domain containing 7 [Source:HGNC Symbol;Acc:HGNC:16712]
9672	SDC3	syndecan 3 [Source:HGNC Symbol;Acc:HGNC:10660]
7054	TH	tyrosine hydroxylase [Source:HGNC Symbol;Acc:HGNC:11782]
2048	EPHB2	EPH receptor B2 [Source:HGNC Symbol;Acc:HGNC:3393]
6124	RPL4	ribosomal protein L4 [Source:HGNC Symbol;Acc:HGNC:10353]
9636	ISG15	ISG15 ubiquitin like modifier [Source:HGNC Symbol;Acc:HGNC:4053]
230	ALDOC	aldolase, fructose-bisphosphate C [Source:HGNC Symbol;Acc:HGNC:418]
64132	XYLT2	xylosyltransferase 2 [Source:HGNC Symbol;Acc:HGNC:15517]
7064	THOP1	thimet oligopeptidase 1 [Source:HGNC Symbol;Acc:HGNC:11793]
10198	MPHOSPH9	M-phase phosphoprotein 9 [Source:HGNC Symbol;Acc:HGNC:7215]
10396	ATP8A1	ATPase phospholipid transporting 8A1 [Source:HGNC Symbol;Acc:HGNC:13531]
10521	DDX17	DEAD-box helicase 17 [Source:HGNC Symbol;Acc:HGNC:2740]
1063	CENPF	centromere protein F [Source:HGNC Symbol;Acc:HGNC:1857]
11168	PSIP1	PC4 and SFRS1 interacting protein 1 [Source:HGNC Symbol;Acc:HGNC:9527]
1122	CHML	CHM like Rab escort protein [Source:HGNC Symbol;Acc:HGNC:1941]
11222	MRPL3	mitochondrial ribosomal protein L3 [Source:HGNC Symbol;Acc:HGNC:10379]
116254	GINM1	glycoprotein integral membrane 1 [Source:HGNC Symbol;Acc:HGNC:21074]
124808	CCDC43	coiled-coil domain containing 43 [Source:HGNC Symbol;Acc:HGNC:26472]
126731	CCSAP	centriole, cilia and spindle associated protein [Source:HGNC Symbol;Acc:HGNC:29578]
138151	NACC2	NACC family member 2 [Source:HGNC Symbol;Acc:HGNC:23846]
138162	C9orf116	chromosome 9 open reading frame 116 [Source:HGNC Symbol;Acc:HGNC:28435]
143384	CACUL1	CDK2 associated cullin domain 1 [Source:HGNC Symbol;Acc:HGNC:23727]
148229	ATP8B3	ATPase phospholipid transporting 8B3 [Source:HGNC Symbol;Acc:HGNC:13535]
150946	GAREM2	GRB2 associated regulator of MAPK1 subtype 2 [Source:HGNC Symbol;Acc:HGNC:27172]
154743	BMT2	base methyltransferase of 25S rRNA 2 homolog [Source:HGNC Symbol;Acc:HGNC:26475]
162073	ITPRIPL2	ITPRIP like 2 [Source:HGNC Symbol;Acc:HGNC:27257]
1820	ARID3A	AT-rich interaction domain 3A [Source:HGNC Symbol;Acc:HGNC:3031]
2192	FBLN1	fibulin 1 [Source:HGNC Symbol;Acc:HGNC:3600]
2218	FKTN	fukutin [Source:HGNC Symbol;Acc:HGNC:3622]
2287	FKBP3	FKBP prolyl isomerase 3 [Source:HGNC Symbol;Acc:HGNC:3719]
23028	KDM1A	lysine demethylase 1A [Source:HGNC Symbol;Acc:HGNC:29079]
23076	RRP1B	ribosomal RNA processing 1B [Source:HGNC Symbol;Acc:HGNC:23818]
23111	SPART	spartin [Source:HGNC Symbol;Acc:HGNC:18514]
23137	SMC5	structural maintenance of chromosomes 5 [Source:HGNC Symbol;Acc:HGNC:20465]
23155	CLCC1	chloride channel CLIC like 1 [Source:HGNC Symbol;Acc:HGNC:29675]
23210	JMJD6	jumonji domain containing 6, arginine demethylase and lysine hydroxylase [Source:HGNC Symbol;Acc:HGNC:19355]
23216	TBC1D1	TBC1 domain family member 1 [Source:HGNC Symbol;Acc:HGNC:11578]
23306	NEMP1	nuclear envelope integral membrane protein 1 [Source:HGNC Symbol;Acc:HGNC:29001]
25816	TNFAIP8	TNF alpha induced protein 8 [Source:HGNC Symbol;Acc:HGNC:17260]
259266	ASPM	assembly factor for spindle microtubules [Source:HGNC Symbol;Acc:HGNC:19048]
26986	PABPC1	poly(A) binding protein cytoplasmic 1 [Source:HGNC Symbol;Acc:HGNC:8554]
27086	FOXP1	forkhead box P1 [Source:HGNC Symbol;Acc:HGNC:3823]
27247	NFU1	NFU1 iron-sulfur cluster scaffold [Source:HGNC Symbol;Acc:HGNC:16287]
27347	STK39	serine/threonine kinase 39 [Source:HGNC Symbol;Acc:HGNC:17717]
2803	GOLGA4	golgin A4 [Source:HGNC Symbol;Acc:HGNC:4427]
283337	ZNF740	zinc finger protein 740 [Source:HGNC Symbol;Acc:HGNC:27465]
283431	GAS2L3	growth arrest specific 2 like 3 [Source:HGNC Symbol;Acc:HGNC:27475]
283464	GXYLT1	glucoside xylosyltransferase 1 [Source:HGNC Symbol;Acc:HGNC:27482]
283547	LINC00639	long intergenic non-protein coding RNA 639 [Source:HGNC Symbol;Acc:HGNC:27502]
285672	SREK1IP1	SREK1 interacting protein 1 [Source:HGNC Symbol;Acc:HGNC:26716]
286826	LIN9	lin-9 DREAM MuvB core complex component [Source:HGNC Symbol;Acc:HGNC:30830]
3006	H1-2	H1.2 linker histone, cluster member [Source:HGNC Symbol;Acc:HGNC:4716]
3068	HDGF	heparin binding growth factor [Source:HGNC Symbol;Acc:HGNC:4856]
348235	SKA2	spindle and kinetochore associated complex subunit 2 [Source:HGNC Symbol;Acc:HGNC:28006]
375484	SIMC1	SUMO interacting motifs containing 1 [Source:HGNC Symbol;Acc:HGNC:24779]
3895	KTN1	kinectin 1 [Source:HGNC Symbol;Acc:HGNC:6467]
3930	LBR	lamin B receptor [Source:HGNC Symbol;Acc:HGNC:6518]
4017	LOXL2	lysyl oxidase like 2 [Source:HGNC Symbol;Acc:HGNC:6666]
403	ARL 3.00	ADP ribosylation factor like GTPase 3 [Source:HGNC Symbol;Acc:HGNC:694]
407975	MIR17HG	miR-17-92a-1 cluster host gene [Source:HGNC Symbol;Acc:HGNC:23564]
4188	MDFI	MyoD family inhibitor [Source:HGNC Symbol;Acc:HGNC:6967]
4664	NAB1	NGFI-A binding protein 1 [Source:HGNC Symbol;Acc:HGNC:7626]
4751	NEK2	NIMA related kinase 2 [Source:HGNC Symbol;Acc:HGNC:7745]
494115	RBMXL1	RBMX like 1 [Source:HGNC Symbol;Acc:HGNC:25073]
51634	RBMX2	RNA binding motif protein X-linked 2 [Source:HGNC Symbol;Acc:HGNC:24282]
53335	BCL11A	BAF chromatin remodeling complex subunit BCL11A [Source:HGNC Symbol;Acc:HGNC:13221]
54620	FBXL19	F-box and leucine rich repeat protein 19 [Source:HGNC Symbol;Acc:HGNC:25300]
54625	PARP14	poly(ADP-ribose) polymerase family member 14 [Source:HGNC Symbol;Acc:HGNC:29232]
54764	ZRANB1	zinc finger RANBP2-type containing 1 [Source:HGNC Symbol;Acc:HGNC:18224]
54801	HAUS6	HAUS augmin like complex subunit 6 [Source:HGNC Symbol;Acc:HGNC:25948]
54809	SAMD9	sterile alpha motif domain containing 9 [Source:HGNC Symbol;Acc:HGNC:1348]
55327	LIN7C	lin-7 homolog C, crumbs cell polarity complex component [Source:HGNC Symbol;Acc:HGNC:17789]
55337	SHFL	shiftless antiviral inhibitor of ribosomal frameshifting [Source:HGNC Symbol;Acc:HGNC:25649]
5597	MAPK6	mitogen-activated protein kinase 6 [Source:HGNC Symbol;Acc:HGNC:6879]
57082	KNL1	kinetochore scaffold 1 [Source:HGNC Symbol;Acc:HGNC:24054]
57458	TMCC3	transmembrane and coiled-coil domain family 3 [Source:HGNC Symbol;Acc:HGNC:29199]
57488	ESYT2	extended synaptotagmin 2 [Source:HGNC Symbol;Acc:HGNC:22211]
5757	PTMA	prothymosin alpha [Source:HGNC Symbol;Acc:HGNC:9623]
57594	HOMEZ	homeobox and leucine zipper encoding [Source:HGNC Symbol;Acc:HGNC:20164]
57691	KIAA1586	KIAA1586 [Source:HGNC Symbol;Acc:HGNC:21360]
5935	RBM3	RNA binding motif protein 3 [Source:HGNC Symbol;Acc:HGNC:9900]
6398	SECTM1	secreted and transmembrane 1 [Source:HGNC Symbol;Acc:HGNC:10707]
642968	FAM163B	family with sequence similarity 163 member B [Source:HGNC Symbol;Acc:HGNC:33277]
64854	USP46	ubiquitin specific peptidase 46 [Source:HGNC Symbol;Acc:HGNC:20075]
6594	SMARCA1	SWI/SNF related, matrix associated, actin dependent regulator of chromatin, subfamily a, member 1 [Source:HGNC Symbol;Acc:HGNC:11097]
665	BNIP3L	BCL2 interacting protein 3 like [Source:HGNC Symbol;Acc:HGNC:1085]
6917	TCEA1	transcription elongation factor A1 [Source:HGNC Symbol;Acc:HGNC:11612]
768206	PRCD	photoreceptor disc component [Source:HGNC Symbol;Acc:HGNC:32528]
79007	DBNDD1	dysbindin domain containing 1 [Source:HGNC Symbol;Acc:HGNC:28455]
79989	TTC26	tetratricopeptide repeat domain 26 [Source:HGNC Symbol;Acc:HGNC:21882]
80010	RMI1	RecQ mediated genome instability 1 [Source:HGNC Symbol;Acc:HGNC:25764]
8100	IFT88	intraflagellar transport 88 [Source:HGNC Symbol;Acc:HGNC:20606]
81611	ANP32E	acidic nuclear phosphoprotein 32 family member E [Source:HGNC Symbol;Acc:HGNC:16673]
84263	HSDL2	hydroxysteroid dehydrogenase like 2 [Source:HGNC Symbol;Acc:HGNC:18572]
8497	PPFIA4	PTPRF interacting protein alpha 4 [Source:HGNC Symbol;Acc:HGNC:9248]
8725	URI1	URI1 prefoldin like chaperone [Source:HGNC Symbol;Acc:HGNC:13236]
8761	PABPC4	poly(A) binding protein cytoplasmic 4 [Source:HGNC Symbol;Acc:HGNC:8557]
89978	DPH6	diphthamine biosynthesis 6 [Source:HGNC Symbol;Acc:HGNC:30543]
90843	TCEAL8	transcription elongation factor A like 8 [Source:HGNC Symbol;Acc:HGNC:28683]
91057	CCDC34	coiled-coil domain containing 34 [Source:HGNC Symbol;Acc:HGNC:25079]
9508	ADAMTS3	ADAM metallopeptidase with thrombospondin type 1 motif 3 [Source:HGNC Symbol;Acc:HGNC:219]
9730	DCAF1	DDB1 and CUL4 associated factor 1 [Source:HGNC Symbol;Acc:HGNC:30911]
9782	MATR3	matrin 3 [Source:HGNC Symbol;Acc:HGNC:6912]
9818	NUP58	nucleoporin 58 [Source:HGNC Symbol;Acc:HGNC:20261]
9994	CASP8AP2	caspase 8 associated protein 2 [Source:HGNC Symbol;Acc:HGNC:1510]

## Sheet: Figure 3E  BIOCARTA G1-S
Overlap Results
Collection(s):	CP:BIOCARTA
# overlaps shown:	1
# genesets in collections:	292
# genes in comparison (n):	140
# genes in universe (N):	40312
Gene Set Name	# Genes in Gene Set (K)	Description	# Genes in Overlap (k)	k/K	p-value	FDR q-value
BIOCARTA_G1_PATHWAY	28	Cell Cycle: G1/S Check Point	3	0.1071	0.000126	0.0368
Gene/Gene Set Overlap Matrix
Entrez Gene Id	Gene Symbol	Gene Description	BIOCARTA_G1_PATHWAY
7027	TFDP1	transcription factor Dp-1 [Source:HGNC Symbol;Acc:HGNC:11749]	BIOCARTA_G1_PATHWAY
3065	HDAC1	histone deacetylase 1 [Source:HGNC Symbol;Acc:HGNC:4852]	BIOCARTA_G1_PATHWAY
1719	DHFR	dihydrofolate reductase [Source:HGNC Symbol;Acc:HGNC:2861]	BIOCARTA_G1_PATHWAY
55294	FBXW7	F-box and WD repeat domain containing 7 [Source:HGNC Symbol;Acc:HGNC:16712]
8569	MKNK1	MAPK interacting serine/threonine kinase 1 [Source:HGNC Symbol;Acc:HGNC:7110]
26986	PABPC1	poly(A) binding protein cytoplasmic 1 [Source:HGNC Symbol;Acc:HGNC:8554]
5597	MAPK6	mitogen-activated protein kinase 6 [Source:HGNC Symbol;Acc:HGNC:6879]
1854	DUT	deoxyuridine triphosphatase [Source:HGNC Symbol;Acc:HGNC:3078]
995	CDC25C	cell division cycle 25C [Source:HGNC Symbol;Acc:HGNC:1727]
154	ADRB2	adrenoceptor beta 2 [Source:HGNC Symbol;Acc:HGNC:286]
9133	CCNB2	cyclin B2 [Source:HGNC Symbol;Acc:HGNC:1580]
847	CAT	catalase [Source:HGNC Symbol;Acc:HGNC:1516]
3418	IDH2	isocitrate dehydrogenase (NADP(+)) 2 [Source:HGNC Symbol;Acc:HGNC:5383]
10198	MPHOSPH9	M-phase phosphoprotein 9 [Source:HGNC Symbol;Acc:HGNC:7215]
10396	ATP8A1	ATPase phospholipid transporting 8A1 [Source:HGNC Symbol;Acc:HGNC:13531]
10521	DDX17	DEAD-box helicase 17 [Source:HGNC Symbol;Acc:HGNC:2740]
10622	POLR3G	RNA polymerase III subunit G [Source:HGNC Symbol;Acc:HGNC:30075]
1063	CENPF	centromere protein F [Source:HGNC Symbol;Acc:HGNC:1857]
11168	PSIP1	PC4 and SFRS1 interacting protein 1 [Source:HGNC Symbol;Acc:HGNC:9527]
1122	CHML	CHM like Rab escort protein [Source:HGNC Symbol;Acc:HGNC:1941]
11222	MRPL3	mitochondrial ribosomal protein L3 [Source:HGNC Symbol;Acc:HGNC:10379]
116254	GINM1	glycoprotein integral membrane 1 [Source:HGNC Symbol;Acc:HGNC:21074]
121504	H4-16	H4 histone 16 [Source:HGNC Symbol;Acc:HGNC:20510]
124808	CCDC43	coiled-coil domain containing 43 [Source:HGNC Symbol;Acc:HGNC:26472]
126731	CCSAP	centriole, cilia and spindle associated protein [Source:HGNC Symbol;Acc:HGNC:29578]
138151	NACC2	NACC family member 2 [Source:HGNC Symbol;Acc:HGNC:23846]
138162	C9orf116	chromosome 9 open reading frame 116 [Source:HGNC Symbol;Acc:HGNC:28435]
143384	CACUL1	CDK2 associated cullin domain 1 [Source:HGNC Symbol;Acc:HGNC:23727]
148229	ATP8B3	ATPase phospholipid transporting 8B3 [Source:HGNC Symbol;Acc:HGNC:13535]
150946	GAREM2	GRB2 associated regulator of MAPK1 subtype 2 [Source:HGNC Symbol;Acc:HGNC:27172]
154743	BMT2	base methyltransferase of 25S rRNA 2 homolog [Source:HGNC Symbol;Acc:HGNC:26475]
162073	ITPRIPL2	ITPRIP like 2 [Source:HGNC Symbol;Acc:HGNC:27257]
1820	ARID3A	AT-rich interaction domain 3A [Source:HGNC Symbol;Acc:HGNC:3031]
1975	EIF4B	eukaryotic translation initiation factor 4B [Source:HGNC Symbol;Acc:HGNC:3285]
2048	EPHB2	EPH receptor B2 [Source:HGNC Symbol;Acc:HGNC:3393]
205	AK4	adenylate kinase 4 [Source:HGNC Symbol;Acc:HGNC:363]
2192	FBLN1	fibulin 1 [Source:HGNC Symbol;Acc:HGNC:3600]
2218	FKTN	fukutin [Source:HGNC Symbol;Acc:HGNC:3622]
2287	FKBP3	FKBP prolyl isomerase 3 [Source:HGNC Symbol;Acc:HGNC:3719]
230	ALDOC	aldolase, fructose-bisphosphate C [Source:HGNC Symbol;Acc:HGNC:418]
23028	KDM1A	lysine demethylase 1A [Source:HGNC Symbol;Acc:HGNC:29079]
23076	RRP1B	ribosomal RNA processing 1B [Source:HGNC Symbol;Acc:HGNC:23818]
23111	SPART	spartin [Source:HGNC Symbol;Acc:HGNC:18514]
23137	SMC5	structural maintenance of chromosomes 5 [Source:HGNC Symbol;Acc:HGNC:20465]
23155	CLCC1	chloride channel CLIC like 1 [Source:HGNC Symbol;Acc:HGNC:29675]
23210	JMJD6	jumonji domain containing 6, arginine demethylase and lysine hydroxylase [Source:HGNC Symbol;Acc:HGNC:19355]
23216	TBC1D1	TBC1 domain family member 1 [Source:HGNC Symbol;Acc:HGNC:11578]
23306	NEMP1	nuclear envelope integral membrane protein 1 [Source:HGNC Symbol;Acc:HGNC:29001]
23451	SF3B1	splicing factor 3b subunit 1 [Source:HGNC Symbol;Acc:HGNC:10768]
25816	TNFAIP8	TNF alpha induced protein 8 [Source:HGNC Symbol;Acc:HGNC:17260]
259266	ASPM	assembly factor for spindle microtubules [Source:HGNC Symbol;Acc:HGNC:19048]
27086	FOXP1	forkhead box P1 [Source:HGNC Symbol;Acc:HGNC:3823]
27247	NFU1	NFU1 iron-sulfur cluster scaffold [Source:HGNC Symbol;Acc:HGNC:16287]
27316	RBMX	RNA binding motif protein X-linked [Source:HGNC Symbol;Acc:HGNC:9910]
27347	STK39	serine/threonine kinase 39 [Source:HGNC Symbol;Acc:HGNC:17717]
2803	GOLGA4	golgin A4 [Source:HGNC Symbol;Acc:HGNC:4427]
283337	ZNF740	zinc finger protein 740 [Source:HGNC Symbol;Acc:HGNC:27465]
283431	GAS2L3	growth arrest specific 2 like 3 [Source:HGNC Symbol;Acc:HGNC:27475]
283464	GXYLT1	glucoside xylosyltransferase 1 [Source:HGNC Symbol;Acc:HGNC:27482]
283547	LINC00639	long intergenic non-protein coding RNA 639 [Source:HGNC Symbol;Acc:HGNC:27502]
285672	SREK1IP1	SREK1 interacting protein 1 [Source:HGNC Symbol;Acc:HGNC:26716]
286826	LIN9	lin-9 DREAM MuvB core complex component [Source:HGNC Symbol;Acc:HGNC:30830]
2956	MSH6	mutS homolog 6 [Source:HGNC Symbol;Acc:HGNC:7329]
3006	H1-2	H1.2 linker histone, cluster member [Source:HGNC Symbol;Acc:HGNC:4716]
3068	HDGF	heparin binding growth factor [Source:HGNC Symbol;Acc:HGNC:4856]
3178	HNRNPA1	heterogeneous nuclear ribonucleoprotein A1 [Source:HGNC Symbol;Acc:HGNC:5031]
348	APOE	apolipoprotein E [Source:HGNC Symbol;Acc:HGNC:613]
348235	SKA2	spindle and kinetochore associated complex subunit 2 [Source:HGNC Symbol;Acc:HGNC:28006]
375484	SIMC1	SUMO interacting motifs containing 1 [Source:HGNC Symbol;Acc:HGNC:24779]
3895	KTN1	kinectin 1 [Source:HGNC Symbol;Acc:HGNC:6467]
3930	LBR	lamin B receptor [Source:HGNC Symbol;Acc:HGNC:6518]
4017	LOXL2	lysyl oxidase like 2 [Source:HGNC Symbol;Acc:HGNC:6666]
403	ARL 3.00	ADP ribosylation factor like GTPase 3 [Source:HGNC Symbol;Acc:HGNC:694]
407975	MIR17HG	miR-17-92a-1 cluster host gene [Source:HGNC Symbol;Acc:HGNC:23564]
4188	MDFI	MyoD family inhibitor [Source:HGNC Symbol;Acc:HGNC:6967]
4357	MPST	mercaptopyruvate sulfurtransferase [Source:HGNC Symbol;Acc:HGNC:7223]
4548	MTR	5-methyltetrahydrofolate-homocysteine methyltransferase [Source:HGNC Symbol;Acc:HGNC:7468]
4664	NAB1	NGFI-A binding protein 1 [Source:HGNC Symbol;Acc:HGNC:7626]
4751	NEK2	NIMA related kinase 2 [Source:HGNC Symbol;Acc:HGNC:7745]
4854	NOTCH3	notch receptor 3 [Source:HGNC Symbol;Acc:HGNC:7883]
494115	RBMXL1	RBMX like 1 [Source:HGNC Symbol;Acc:HGNC:25073]
51634	RBMX2	RNA binding motif protein X-linked 2 [Source:HGNC Symbol;Acc:HGNC:24282]
53335	BCL11A	BAF chromatin remodeling complex subunit BCL11A [Source:HGNC Symbol;Acc:HGNC:13221]
54620	FBXL19	F-box and leucine rich repeat protein 19 [Source:HGNC Symbol;Acc:HGNC:25300]
54625	PARP14	poly(ADP-ribose) polymerase family member 14 [Source:HGNC Symbol;Acc:HGNC:29232]
54764	ZRANB1	zinc finger RANBP2-type containing 1 [Source:HGNC Symbol;Acc:HGNC:18224]
54801	HAUS6	HAUS augmin like complex subunit 6 [Source:HGNC Symbol;Acc:HGNC:25948]
54809	SAMD9	sterile alpha motif domain containing 9 [Source:HGNC Symbol;Acc:HGNC:1348]
55327	LIN7C	lin-7 homolog C, crumbs cell polarity complex component [Source:HGNC Symbol;Acc:HGNC:17789]
55337	SHFL	shiftless antiviral inhibitor of ribosomal frameshifting [Source:HGNC Symbol;Acc:HGNC:25649]
57082	KNL1	kinetochore scaffold 1 [Source:HGNC Symbol;Acc:HGNC:24054]
57458	TMCC3	transmembrane and coiled-coil domain family 3 [Source:HGNC Symbol;Acc:HGNC:29199]
57488	ESYT2	extended synaptotagmin 2 [Source:HGNC Symbol;Acc:HGNC:22211]
5757	PTMA	prothymosin alpha [Source:HGNC Symbol;Acc:HGNC:9623]
57594	HOMEZ	homeobox and leucine zipper encoding [Source:HGNC Symbol;Acc:HGNC:20164]
57691	KIAA1586	KIAA1586 [Source:HGNC Symbol;Acc:HGNC:21360]
5935	RBM3	RNA binding motif protein 3 [Source:HGNC Symbol;Acc:HGNC:9900]
6124	RPL4	ribosomal protein L4 [Source:HGNC Symbol;Acc:HGNC:10353]
6398	SECTM1	secreted and transmembrane 1 [Source:HGNC Symbol;Acc:HGNC:10707]
64132	XYLT2	xylosyltransferase 2 [Source:HGNC Symbol;Acc:HGNC:15517]
642968	FAM163B	family with sequence similarity 163 member B [Source:HGNC Symbol;Acc:HGNC:33277]
6452	SH3BP2	SH3 domain binding protein 2 [Source:HGNC Symbol;Acc:HGNC:10825]
64854	USP46	ubiquitin specific peptidase 46 [Source:HGNC Symbol;Acc:HGNC:20075]
6594	SMARCA1	SWI/SNF related, matrix associated, actin dependent regulator of chromatin, subfamily a, member 1 [Source:HGNC Symbol;Acc:HGNC:11097]
665	BNIP3L	BCL2 interacting protein 3 like [Source:HGNC Symbol;Acc:HGNC:1085]
6917	TCEA1	transcription elongation factor A1 [Source:HGNC Symbol;Acc:HGNC:11612]
7054	TH	tyrosine hydroxylase [Source:HGNC Symbol;Acc:HGNC:11782]
7064	THOP1	thimet oligopeptidase 1 [Source:HGNC Symbol;Acc:HGNC:11793]
768206	PRCD	photoreceptor disc component [Source:HGNC Symbol;Acc:HGNC:32528]
79007	DBNDD1	dysbindin domain containing 1 [Source:HGNC Symbol;Acc:HGNC:28455]
79989	TTC26	tetratricopeptide repeat domain 26 [Source:HGNC Symbol;Acc:HGNC:21882]
80010	RMI1	RecQ mediated genome instability 1 [Source:HGNC Symbol;Acc:HGNC:25764]
80223	RAB11FIP1	RAB11 family interacting protein 1 [Source:HGNC Symbol;Acc:HGNC:30265]
8100	IFT88	intraflagellar transport 88 [Source:HGNC Symbol;Acc:HGNC:20606]
81611	ANP32E	acidic nuclear phosphoprotein 32 family member E [Source:HGNC Symbol;Acc:HGNC:16673]
8294	H4C9	H4 clustered histone 9 [Source:HGNC Symbol;Acc:HGNC:4793]
8334	H2AC6	H2A clustered histone 6 [Source:HGNC Symbol;Acc:HGNC:4733]
8338	H2AC20	H2A clustered histone 20 [Source:HGNC Symbol;Acc:HGNC:4738]
8354	H3C11	H3 clustered histone 11 [Source:HGNC Symbol;Acc:HGNC:4771]
8357	H3C10	H3 clustered histone 10 [Source:HGNC Symbol;Acc:HGNC:4775]
8362	H4C12	H4 clustered histone 12 [Source:HGNC Symbol;Acc:HGNC:4784]
8363	H4C11	H4 clustered histone 11 [Source:HGNC Symbol;Acc:HGNC:4785]
84263	HSDL2	hydroxysteroid dehydrogenase like 2 [Source:HGNC Symbol;Acc:HGNC:18572]
8443	GNPAT	glyceronephosphate O-acyltransferase [Source:HGNC Symbol;Acc:HGNC:4416]
8497	PPFIA4	PTPRF interacting protein alpha 4 [Source:HGNC Symbol;Acc:HGNC:9248]
84991	RBM17	RNA binding motif protein 17 [Source:HGNC Symbol;Acc:HGNC:16944]
8503	PIK3R3	phosphoinositide-3-kinase regulatory subunit 3 [Source:HGNC Symbol;Acc:HGNC:8981]
8725	URI1	URI1 prefoldin like chaperone [Source:HGNC Symbol;Acc:HGNC:13236]
8761	PABPC4	poly(A) binding protein cytoplasmic 4 [Source:HGNC Symbol;Acc:HGNC:8557]
89978	DPH6	diphthamine biosynthesis 6 [Source:HGNC Symbol;Acc:HGNC:30543]
90843	TCEAL8	transcription elongation factor A like 8 [Source:HGNC Symbol;Acc:HGNC:28683]
91057	CCDC34	coiled-coil domain containing 34 [Source:HGNC Symbol;Acc:HGNC:25079]
9508	ADAMTS3	ADAM metallopeptidase with thrombospondin type 1 motif 3 [Source:HGNC Symbol;Acc:HGNC:219]
9636	ISG15	ISG15 ubiquitin like modifier [Source:HGNC Symbol;Acc:HGNC:4053]
9672	SDC3	syndecan 3 [Source:HGNC Symbol;Acc:HGNC:10660]
9730	DCAF1	DDB1 and CUL4 associated factor 1 [Source:HGNC Symbol;Acc:HGNC:30911]
9782	MATR3	matrin 3 [Source:HGNC Symbol;Acc:HGNC:6912]
9818	NUP58	nucleoporin 58 [Source:HGNC Symbol;Acc:HGNC:20261]
9985	REC8	REC8 meiotic recombination protein [Source:HGNC Symbol;Acc:HGNC:16879]
9994	CASP8AP2	caspase 8 associated protein 2 [Source:HGNC Symbol;Acc:HGNC:1510]

## Sheet: Figure 3E GO mitochondrial
Overlap Results
Collection(s):	GO:BP
# overlaps shown:	20
# genesets in collections:	7481
# genes in comparison (n):	86
# genes in universe (N):	40312
Gene Set Name	# Genes in Gene Set (K)	Description	# Genes in Overlap (k)	k/K	p-value	FDR q-value
GOBP_ATP_METABOLIC_PROCESS	313	The chemical reactions and pathways involving ATP, adenosine triphosphate, a universally important coenzyme and enzyme regulator. [GOC:go_curators]	9	0.0288	2.49e-08	0.000186
GOBP_RESPONSE_TO_TOPOLOGICALLY_INCORRECT_PROTEIN	205	Any process that results in a change in state or activity of a cell or an organism (in terms of movement, secretion, enzyme production, gene expression, etc.) as a result of a protein that is not folded in its correct three-dimensional structure. [GOC:bf]	7	0.0341	3.04e-07	0.00114
GOBP_MEMBRANE_ORGANIZATION	949	A process which results in the assembly, arrangement of constituent parts, or disassembly of a membrane. A membrane is a double layer of lipid molecules that encloses all cells, and, in eukaryotes, many organelles; may be a single or double lipid bilayer; also includes associated proteins. [GOC:dph, GOC:tb]	12	0.0126	8.37e-07	0.00209
GOBP_MITOCHONDRION_ORGANIZATION	548	A process that is carried out at the cellular level which results in the assembly, arrangement of constituent parts, or disassembly of a mitochondrion; includes mitochondrial morphogenesis and distribution, and replication of the mitochondrial genome as well as synthesis of new mitochondrial components. [GOC:dph, GOC:jl, GOC:mah, GOC:sgd_curators, PMID:9786946]	9	0.0164	2.7e-06	0.00446
GOBP_PROTEIN_CONTAINING_COMPLEX_SUBUNIT_ORGANIZATION	1959	Any process in which macromolecules aggregate, disaggregate, or are modified, resulting in the formation, disassembly, or alteration of a protein complex. [GOC:mah]	16	0.0082	3.48e-06	0.00446
GOBP_INTRACELLULAR_TRANSPORT	1730	The directed movement of substances within a cell. [GOC:ai]	15	0.0087	3.58e-06	0.00446
GOBP_REGULATION_OF_INCLUSION_BODY_ASSEMBLY	16	Any process that modulates the rate, frequency, or extent of inclusion body assembly. Inclusion body assembly is the aggregation, arrangement and bonding together of a set of components to form an inclusion body. [GOC:BHF, GOC:dph, GOC:tb]	3	0.1875	5.15e-06	0.00518
GOBP_ENDOPLASMIC_RETICULUM_TO_GOLGI_VESICLE_MEDIATED_TRANSPORT	206	The directed movement of substances from the endoplasmic reticulum (ER) to the Golgi, mediated by COP II vesicles. Small COP II coated vesicles form from the ER and then fuse directly with the cis-Golgi. Larger structures are transported along microtubules to the cis-Golgi. [GOC:ascb_2009, GOC:dph, GOC:jp, GOC:tb, ISBN:0716731363]	6	0.0291	5.54e-06	0.00518
GOBP_REGULATION_OF_ORGANELLE_ORGANIZATION	1165	Any process that modulates the frequency, rate or extent of a process involved in the formation, arrangement of constituent parts, or disassembly of an organelle. [GOC:mah]	12	0.0103	6.85e-06	0.00551
GOBP_TRANSMEMBRANE_TRANSPORT	1605	The process in which a solute is transported across a lipid bilayer, from one side of a membrane to the other. [GOC:dph, GOC:jid]	14	0.0087	7.36e-06	0.00551
GOBP_REGULATION_OF_MICROTUBULE_CYTOSKELETON_ORGANIZATION	137	Any process that modulates the frequency, rate or extent of the formation, arrangement of constituent parts, or disassembly of cytoskeletal structures comprising microtubules and their associated proteins. [GOC:mah]	5	0.0365	1.18e-05	0.00749
GOBP_SIGNAL_TRANSDUCTION_IN_ABSENCE_OF_LIGAND	67	A series of molecular signals initiated by the absence of a ligand or the withdrawal of a ligand from a receptor. [GOC:al, GOC:ppm, GOC:pr, PMID:15044679]	4	0.0597	1.34e-05	0.00749
GOBP_REGULATION_OF_CYTOSKELETON_ORGANIZATION	510	Any process that modulates the frequency, rate or extent of the formation, arrangement of constituent parts, or disassembly of cytoskeletal structures. [GOC:ai]	8	0.0157	1.39e-05	0.00749
GOBP_RESPONSE_TO_HYPEROXIA	22	Any process that results in a change in state or activity of a cell or an organism (in terms of movement, secretion, enzyme production, gene expression, etc.) as a result of a stimulus indicating increased oxygen tension. [GOC:kmv]	3	0.1364	1.4e-05	0.00749
GOBP_INCLUSION_BODY_ASSEMBLY	23	The aggregation, arrangement and bonding together of a set of components to form an inclusion body. [GOC:BHF, GOC:mah]	3	0.1304	1.61e-05	0.00799
GOBP_OXIDATIVE_PHOSPHORYLATION	148	The phosphorylation of ADP to ATP that accompanies the oxidation of a metabolite through the operation of the respiratory chain. Oxidation of compounds establishes a proton gradient across the membrane, providing the energy for ATP synthesis. [ISBN:0198506732, ISBN:0471331309]	5	0.0338	1.71e-05	0.00799
GOBP_REGULATION_OF_CELLULAR_RESPONSE_TO_STRESS	699	Any process that modulates the frequency, rate or extent of a cellular response to stress. Cellular response to stress is a change in state or activity of a cell (in terms of movement, secretion, enzyme production, gene expression, etc.) as a result of a stimulus indicating the organism is under stress. The stress is usually, but not necessarily, exogenous (e.g. temperature, humidity, ionizing ra…	9	0.0129	1.89e-05	0.00815
GOBP_CATION_TRANSMEMBRANE_TRANSPORT	886	The process in which a cation is transported across a membrane. [GOC:dos, GOC:vw]	10	0.0113	1.96e-05	0.00815
GOBP_REGULATION_OF_SPINDLE_ASSEMBLY	25	Any process that modulates the rate, frequency or extent of spindle assembly. Spindle assembly is the aggregation, arrangement and bonding together of a set of components to form the spindle, the array of microtubules and associated molecules that serves to move duplicated chromosomes apart. [GOC:ascb_2009, GOC:dph, GOC:tb]	3	0.12	2.08e-05	0.00821
GOBP_RESPONSE_TO_HEAT	161	Any process that results in a change in state or activity of a cell or an organism (in terms of movement, secretion, enzyme production, gene expression, etc.) as a result of a heat stimulus, a temperature stimulus above the optimal temperature for that organism. [GOC:lr]	5	0.0311	2.56e-05	0.00915
Gene/Gene Set Overlap Matrix
Entrez Gene Id	Gene Symbol	Gene Description	GOBP_ATP_METABOLIC_PROCESS	GOBP_RESPONSE_TO_TOPOLOGICALLY_INCORRECT_PROTEIN	GOBP_MEMBRANE_ORGANIZATION	GOBP_MITOCHONDRION_ORGANIZATION	GOBP_PROTEIN_CONTAINING_COMPLEX_SUBUNIT_ORGANIZATION	GOBP_INTRACELLULAR_TRANSPORT	GOBP_REGULATION_OF_INCLUSION_BODY_ASSEMBLY	GOBP_ENDOPLASMIC_RETICULUM_TO_GOLGI_VESICLE_MEDIATED_TRANSPORT	GOBP_REGULATION_OF_ORGANELLE_ORGANIZATION	GOBP_TRANSMEMBRANE_TRANSPORT	GOBP_REGULATION_OF_MICROTUBULE_CYTOSKELETON_ORGANIZATION	GOBP_SIGNAL_TRANSDUCTION_IN_ABSENCE_OF_LIGAND	GOBP_REGULATION_OF_CYTOSKELETON_ORGANIZATION	GOBP_RESPONSE_TO_HYPEROXIA	GOBP_INCLUSION_BODY_ASSEMBLY	GOBP_OXIDATIVE_PHOSPHORYLATION	GOBP_REGULATION_OF_CELLULAR_RESPONSE_TO_STRESS	GOBP_CATION_TRANSMEMBRANE_TRANSPORT	GOBP_REGULATION_OF_SPINDLE_ASSEMBLY	GOBP_RESPONSE_TO_HEAT
3303	HSPA1A	heat shock protein family A (Hsp70) member 1A [Source:HGNC Symbol;Acc:HGNC:5232]	GOBP_ATP_METABOLIC_PROCESS	GOBP_RESPONSE_TO_TOPOLOGICALLY_INCORRECT_PROTEIN	GOBP_MEMBRANE_ORGANIZATION	GOBP_MITOCHONDRION_ORGANIZATION	GOBP_PROTEIN_CONTAINING_COMPLEX_SUBUNIT_ORGANIZATION		GOBP_REGULATION_OF_INCLUSION_BODY_ASSEMBLY		GOBP_REGULATION_OF_ORGANELLE_ORGANIZATION		GOBP_REGULATION_OF_MICROTUBULE_CYTOSKELETON_ORGANIZATION	GOBP_SIGNAL_TRANSDUCTION_IN_ABSENCE_OF_LIGAND	GOBP_REGULATION_OF_CYTOSKELETON_ORGANIZATION		GOBP_INCLUSION_BODY_ASSEMBLY		GOBP_REGULATION_OF_CELLULAR_RESPONSE_TO_STRESS		GOBP_REGULATION_OF_SPINDLE_ASSEMBLY	GOBP_RESPONSE_TO_HEAT
3304	HSPA1B	heat shock protein family A (Hsp70) member 1B [Source:HGNC Symbol;Acc:HGNC:5233]	GOBP_ATP_METABOLIC_PROCESS	GOBP_RESPONSE_TO_TOPOLOGICALLY_INCORRECT_PROTEIN			GOBP_PROTEIN_CONTAINING_COMPLEX_SUBUNIT_ORGANIZATION		GOBP_REGULATION_OF_INCLUSION_BODY_ASSEMBLY		GOBP_REGULATION_OF_ORGANELLE_ORGANIZATION		GOBP_REGULATION_OF_MICROTUBULE_CYTOSKELETON_ORGANIZATION	GOBP_SIGNAL_TRANSDUCTION_IN_ABSENCE_OF_LIGAND	GOBP_REGULATION_OF_CYTOSKELETON_ORGANIZATION		GOBP_INCLUSION_BODY_ASSEMBLY		GOBP_REGULATION_OF_CELLULAR_RESPONSE_TO_STRESS		GOBP_REGULATION_OF_SPINDLE_ASSEMBLY	GOBP_RESPONSE_TO_HEAT
4508	MT-ATP6	mitochondrially encoded ATP synthase membrane subunit 6 [Source:HGNC Symbol;Acc:HGNC:7414]	GOBP_ATP_METABOLIC_PROCESS		GOBP_MEMBRANE_ORGANIZATION	GOBP_MITOCHONDRION_ORGANIZATION		GOBP_INTRACELLULAR_TRANSPORT				GOBP_TRANSMEMBRANE_TRANSPORT				GOBP_RESPONSE_TO_HYPEROXIA		GOBP_OXIDATIVE_PHOSPHORYLATION		GOBP_CATION_TRANSMEMBRANE_TRANSPORT
4536	MT-ND2	mitochondrially encoded NADH:ubiquinone oxidoreductase core subunit 2 [Source:HGNC Symbol;Acc:HGNC:7456]	GOBP_ATP_METABOLIC_PROCESS			GOBP_MITOCHONDRION_ORGANIZATION	GOBP_PROTEIN_CONTAINING_COMPLEX_SUBUNIT_ORGANIZATION											GOBP_OXIDATIVE_PHOSPHORYLATION
4514	MT-CO3	mitochondrially encoded cytochrome c oxidase III [Source:HGNC Symbol;Acc:HGNC:7422]	GOBP_ATP_METABOLIC_PROCESS				GOBP_PROTEIN_CONTAINING_COMPLEX_SUBUNIT_ORGANIZATION					GOBP_TRANSMEMBRANE_TRANSPORT						GOBP_OXIDATIVE_PHOSPHORYLATION		GOBP_CATION_TRANSMEMBRANE_TRANSPORT
100101267	POM121C	POM121 transmembrane nucleoporin C [Source:HGNC Symbol;Acc:HGNC:34005]	GOBP_ATP_METABOLIC_PROCESS					GOBP_INTRACELLULAR_TRANSPORT											GOBP_REGULATION_OF_CELLULAR_RESPONSE_TO_STRESS			GOBP_RESPONSE_TO_HEAT
9883	POM121	POM121 transmembrane nucleoporin [Source:HGNC Symbol;Acc:HGNC:19702]	GOBP_ATP_METABOLIC_PROCESS					GOBP_INTRACELLULAR_TRANSPORT											GOBP_REGULATION_OF_CELLULAR_RESPONSE_TO_STRESS			GOBP_RESPONSE_TO_HEAT
4519	MT-CYB	mitochondrially encoded cytochrome b [Source:HGNC Symbol;Acc:HGNC:7427]	GOBP_ATP_METABOLIC_PROCESS									GOBP_TRANSMEMBRANE_TRANSPORT				GOBP_RESPONSE_TO_HYPEROXIA		GOBP_OXIDATIVE_PHOSPHORYLATION		GOBP_CATION_TRANSMEMBRANE_TRANSPORT		GOBP_RESPONSE_TO_HEAT
29796	UQCR10	ubiquinol-cytochrome c reductase, complex III subunit X [Source:HGNC Symbol;Acc:HGNC:30863]	GOBP_ATP_METABOLIC_PROCESS															GOBP_OXIDATIVE_PHOSPHORYLATION
1191	CLU	clusterin [Source:HGNC Symbol;Acc:HGNC:2095]		GOBP_RESPONSE_TO_TOPOLOGICALLY_INCORRECT_PROTEIN	GOBP_MEMBRANE_ORGANIZATION	GOBP_MITOCHONDRION_ORGANIZATION	GOBP_PROTEIN_CONTAINING_COMPLEX_SUBUNIT_ORGANIZATION	GOBP_INTRACELLULAR_TRANSPORT	GOBP_REGULATION_OF_INCLUSION_BODY_ASSEMBLY		GOBP_REGULATION_OF_ORGANELLE_ORGANIZATION	GOBP_TRANSMEMBRANE_TRANSPORT					GOBP_INCLUSION_BODY_ASSEMBLY		GOBP_REGULATION_OF_CELLULAR_RESPONSE_TO_STRESS
578	BAK1	BCL2 antagonist/killer 1 [Source:HGNC Symbol;Acc:HGNC:949]		GOBP_RESPONSE_TO_TOPOLOGICALLY_INCORRECT_PROTEIN	GOBP_MEMBRANE_ORGANIZATION	GOBP_MITOCHONDRION_ORGANIZATION	GOBP_PROTEIN_CONTAINING_COMPLEX_SUBUNIT_ORGANIZATION				GOBP_REGULATION_OF_ORGANELLE_ORGANIZATION	GOBP_TRANSMEMBRANE_TRANSPORT		GOBP_SIGNAL_TRANSDUCTION_IN_ABSENCE_OF_LIGAND					GOBP_REGULATION_OF_CELLULAR_RESPONSE_TO_STRESS
9927	MFN2	mitofusin 2 [Source:HGNC Symbol;Acc:HGNC:16877]		GOBP_RESPONSE_TO_TOPOLOGICALLY_INCORRECT_PROTEIN	GOBP_MEMBRANE_ORGANIZATION	GOBP_MITOCHONDRION_ORGANIZATION		GOBP_INTRACELLULAR_TRANSPORT
51528	JKAMP	JNK1/MAPK8 associated membrane protein [Source:HGNC Symbol;Acc:HGNC:20184]		GOBP_RESPONSE_TO_TOPOLOGICALLY_INCORRECT_PROTEIN
64224	HERPUD2	HERPUD family member 2 [Source:HGNC Symbol;Acc:HGNC:21915]		GOBP_RESPONSE_TO_TOPOLOGICALLY_INCORRECT_PROTEIN
553115	PEF1	penta-EF-hand domain containing 1 [Source:HGNC Symbol;Acc:HGNC:30009]			GOBP_MEMBRANE_ORGANIZATION		GOBP_PROTEIN_CONTAINING_COMPLEX_SUBUNIT_ORGANIZATION	GOBP_INTRACELLULAR_TRANSPORT		GOBP_ENDOPLASMIC_RETICULUM_TO_GOLGI_VESICLE_MEDIATED_TRANSPORT
5537	PPP6C	protein phosphatase 6 catalytic subunit [Source:HGNC Symbol;Acc:HGNC:9323]			GOBP_MEMBRANE_ORGANIZATION		GOBP_PROTEIN_CONTAINING_COMPLEX_SUBUNIT_ORGANIZATION	GOBP_INTRACELLULAR_TRANSPORT		GOBP_ENDOPLASMIC_RETICULUM_TO_GOLGI_VESICLE_MEDIATED_TRANSPORT
114088	TRIM9	tripartite motif containing 9 [Source:HGNC Symbol;Acc:HGNC:16288]			GOBP_MEMBRANE_ORGANIZATION		GOBP_PROTEIN_CONTAINING_COMPLEX_SUBUNIT_ORGANIZATION				GOBP_REGULATION_OF_ORGANELLE_ORGANIZATION
84364	ARFGAP2	ADP ribosylation factor GTPase activating protein 2 [Source:HGNC Symbol;Acc:HGNC:13504]			GOBP_MEMBRANE_ORGANIZATION			GOBP_INTRACELLULAR_TRANSPORT		GOBP_ENDOPLASMIC_RETICULUM_TO_GOLGI_VESICLE_MEDIATED_TRANSPORT
5007	OSBP	oxysterol binding protein [Source:HGNC Symbol;Acc:HGNC:8503]			GOBP_MEMBRANE_ORGANIZATION			GOBP_INTRACELLULAR_TRANSPORT
6855	SYP	synaptophysin [Source:HGNC Symbol;Acc:HGNC:11506]			GOBP_MEMBRANE_ORGANIZATION
79188	TMEM43	transmembrane protein 43 [Source:HGNC Symbol;Acc:HGNC:28472]			GOBP_MEMBRANE_ORGANIZATION
55245	UQCC1	ubiquinol-cytochrome c reductase complex assembly factor 1 [Source:HGNC Symbol;Acc:HGNC:15891]				GOBP_MITOCHONDRION_ORGANIZATION	GOBP_PROTEIN_CONTAINING_COMPLEX_SUBUNIT_ORGANIZATION
23710	GABARAPL1	GABA type A receptor associated protein like 1 [Source:HGNC Symbol;Acc:HGNC:4068]				GOBP_MITOCHONDRION_ORGANIZATION	GOBP_PROTEIN_CONTAINING_COMPLEX_SUBUNIT_ORGANIZATION
10440	TIMM17A	translocase of inner mitochondrial membrane 17A [Source:HGNC Symbol;Acc:HGNC:17315]				GOBP_MITOCHONDRION_ORGANIZATION		GOBP_INTRACELLULAR_TRANSPORT				GOBP_TRANSMEMBRANE_TRANSPORT
6047	RNF4	ring finger protein 4 [Source:HGNC Symbol;Acc:HGNC:10067]					GOBP_PROTEIN_CONTAINING_COMPLEX_SUBUNIT_ORGANIZATION				GOBP_REGULATION_OF_ORGANELLE_ORGANIZATION		GOBP_REGULATION_OF_MICROTUBULE_CYTOSKELETON_ORGANIZATION		GOBP_REGULATION_OF_CYTOSKELETON_ORGANIZATION						GOBP_REGULATION_OF_SPINDLE_ASSEMBLY
81551	STMN4	stathmin 4 [Source:HGNC Symbol;Acc:HGNC:16078]					GOBP_PROTEIN_CONTAINING_COMPLEX_SUBUNIT_ORGANIZATION				GOBP_REGULATION_OF_ORGANELLE_ORGANIZATION		GOBP_REGULATION_OF_MICROTUBULE_CYTOSKELETON_ORGANIZATION		GOBP_REGULATION_OF_CYTOSKELETON_ORGANIZATION
25939	SAMHD1	SAM and HD domain containing deoxynucleoside triphosphate triphosphohydrolase 1 [Source:HGNC Symbol;Acc:HGNC:15925]					GOBP_PROTEIN_CONTAINING_COMPLEX_SUBUNIT_ORGANIZATION
64784	CRTC3	CREB regulated transcription coactivator 3 [Source:HGNC Symbol;Acc:HGNC:26148]					GOBP_PROTEIN_CONTAINING_COMPLEX_SUBUNIT_ORGANIZATION
54442	KCTD5	potassium channel tetramerization domain containing 5 [Source:HGNC Symbol;Acc:HGNC:21423]					GOBP_PROTEIN_CONTAINING_COMPLEX_SUBUNIT_ORGANIZATION
378	ARF4	ADP ribosylation factor 4 [Source:HGNC Symbol;Acc:HGNC:655]						GOBP_INTRACELLULAR_TRANSPORT		GOBP_ENDOPLASMIC_RETICULUM_TO_GOLGI_VESICLE_MEDIATED_TRANSPORT
11070	TMEM115	transmembrane protein 115 [Source:HGNC Symbol;Acc:HGNC:30055]						GOBP_INTRACELLULAR_TRANSPORT		GOBP_ENDOPLASMIC_RETICULUM_TO_GOLGI_VESICLE_MEDIATED_TRANSPORT
29959	NRBP1	nuclear receptor binding protein 1 [Source:HGNC Symbol;Acc:HGNC:7993]						GOBP_INTRACELLULAR_TRANSPORT		GOBP_ENDOPLASMIC_RETICULUM_TO_GOLGI_VESICLE_MEDIATED_TRANSPORT
4135	MAP6	microtubule associated protein 6 [Source:HGNC Symbol;Acc:HGNC:6868]						GOBP_INTRACELLULAR_TRANSPORT			GOBP_REGULATION_OF_ORGANELLE_ORGANIZATION		GOBP_REGULATION_OF_MICROTUBULE_CYTOSKELETON_ORGANIZATION		GOBP_REGULATION_OF_CYTOSKELETON_ORGANIZATION
30000	TNPO2	transportin 2 [Source:HGNC Symbol;Acc:HGNC:19998]						GOBP_INTRACELLULAR_TRANSPORT
1613	DAPK3	death associated protein kinase 3 [Source:HGNC Symbol;Acc:HGNC:2676]									GOBP_REGULATION_OF_ORGANELLE_ORGANIZATION			GOBP_SIGNAL_TRANSDUCTION_IN_ABSENCE_OF_LIGAND	GOBP_REGULATION_OF_CYTOSKELETON_ORGANIZATION
5066	PAM	peptidylglycine alpha-amidating monooxygenase [Source:HGNC Symbol;Acc:HGNC:8596]									GOBP_REGULATION_OF_ORGANELLE_ORGANIZATION				GOBP_REGULATION_OF_CYTOSKELETON_ORGANIZATION
4703	NEB	nebulin [Source:HGNC Symbol;Acc:HGNC:7720]									GOBP_REGULATION_OF_ORGANELLE_ORGANIZATION				GOBP_REGULATION_OF_CYTOSKELETON_ORGANIZATION
57535	ELAPOR1	endosome-lysosome associated apoptosis and autophagy regulator 1 [Source:HGNC Symbol;Acc:HGNC:29618]									GOBP_REGULATION_OF_ORGANELLE_ORGANIZATION
7070	THY1	Thy-1 cell surface antigen [Source:HGNC Symbol;Acc:HGNC:11801]										GOBP_TRANSMEMBRANE_TRANSPORT							GOBP_REGULATION_OF_CELLULAR_RESPONSE_TO_STRESS	GOBP_CATION_TRANSMEMBRANE_TRANSPORT
5170	PDPK1	3-phosphoinositide dependent protein kinase 1 [Source:HGNC Symbol;Acc:HGNC:8816]										GOBP_TRANSMEMBRANE_TRANSPORT								GOBP_CATION_TRANSMEMBRANE_TRANSPORT
6520	SLC3A2	solute carrier family 3 member 2 [Source:HGNC Symbol;Acc:HGNC:11026]										GOBP_TRANSMEMBRANE_TRANSPORT								GOBP_CATION_TRANSMEMBRANE_TRANSPORT
10479	SLC9A6	solute carrier family 9 member A6 [Source:HGNC Symbol;Acc:HGNC:11079]										GOBP_TRANSMEMBRANE_TRANSPORT								GOBP_CATION_TRANSMEMBRANE_TRANSPORT
25800	SLC39A6	solute carrier family 39 member 6 [Source:HGNC Symbol;Acc:HGNC:18607]										GOBP_TRANSMEMBRANE_TRANSPORT								GOBP_CATION_TRANSMEMBRANE_TRANSPORT
123606	NIPA1	NIPA magnesium transporter 1 [Source:HGNC Symbol;Acc:HGNC:17043]										GOBP_TRANSMEMBRANE_TRANSPORT								GOBP_CATION_TRANSMEMBRANE_TRANSPORT
55238	SLC38A7	solute carrier family 38 member 7 [Source:HGNC Symbol;Acc:HGNC:25582]										GOBP_TRANSMEMBRANE_TRANSPORT								GOBP_CATION_TRANSMEMBRANE_TRANSPORT
79939	SLC35E1	solute carrier family 35 member E1 [Source:HGNC Symbol;Acc:HGNC:20803]										GOBP_TRANSMEMBRANE_TRANSPORT
1543	CYP1A1	cytochrome P450 family 1 subfamily A member 1 [Source:HGNC Symbol;Acc:HGNC:2595]														GOBP_RESPONSE_TO_HYPEROXIA
4616	GADD45B	growth arrest and DNA damage inducible beta [Source:HGNC Symbol;Acc:HGNC:4096]																	GOBP_REGULATION_OF_CELLULAR_RESPONSE_TO_STRESS
29956	CERS2	ceramide synthase 2 [Source:HGNC Symbol;Acc:HGNC:14076]																	GOBP_REGULATION_OF_CELLULAR_RESPONSE_TO_STRESS
7448	VTN	vitronectin [Source:HGNC Symbol;Acc:HGNC:12724]
58493	INIP	INTS3 and NABP interacting protein [Source:HGNC Symbol;Acc:HGNC:24994]
79888	LPCAT1	lysophosphatidylcholine acyltransferase 1 [Source:HGNC Symbol;Acc:HGNC:25718]
116442	RAB39B	RAB39B, member RAS oncogene family [Source:HGNC Symbol;Acc:HGNC:16499]
399979	SNX19	sorting nexin 19 [Source:HGNC Symbol;Acc:HGNC:21532]
51335	NGRN	neugrin, neurite outgrowth associated [Source:HGNC Symbol;Acc:HGNC:18077]
4758	NEU1	neuraminidase 1 [Source:HGNC Symbol;Acc:HGNC:7758]
84926	SPRYD3	SPRY domain containing 3 [Source:HGNC Symbol;Acc:HGNC:25920]
83787	ARMC10	armadillo repeat containing 10 [Source:HGNC Symbol;Acc:HGNC:21706]
23252	OTUD3	OTU deubiquitinase 3 [Source:HGNC Symbol;Acc:HGNC:29038]
80194	TMEM134	transmembrane protein 134 [Source:HGNC Symbol;Acc:HGNC:26142]
10924	SMPDL3A	sphingomyelin phosphodiesterase acid like 3A [Source:HGNC Symbol;Acc:HGNC:17389]
93210	PGAP3	post-GPI attachment to proteins phospholipase 3 [Source:HGNC Symbol;Acc:HGNC:23719]
10423	CDIPT	CDP-diacylglycerol--inositol 3-phosphatidyltransferase [Source:HGNC Symbol;Acc:HGNC:1769]
55739	NAXD	NAD(P)HX dehydratase [Source:HGNC Symbol;Acc:HGNC:25576]
23154	NCDN	neurochondrin [Source:HGNC Symbol;Acc:HGNC:17597]
220164	DOK6	docking protein 6 [Source:HGNC Symbol;Acc:HGNC:28301]
25893	TRIM58	tripartite motif containing 58 [Source:HGNC Symbol;Acc:HGNC:24150]
27314	RAB30	RAB30, member RAS oncogene family [Source:HGNC Symbol;Acc:HGNC:9770]
56006	SMG9	SMG9 nonsense mediated mRNA decay factor [Source:HGNC Symbol;Acc:HGNC:25763]
81572	PDRG1	p53 and DNA damage regulated 1 [Source:HGNC Symbol;Acc:HGNC:16119]
10904	BLCAP	BLCAP apoptosis inducing factor [Source:HGNC Symbol;Acc:HGNC:1055]
56990	CDC42SE2	CDC42 small effector 2 [Source:HGNC Symbol;Acc:HGNC:18547]
29880	ALG5	ALG5 dolichyl-phosphate beta-glucosyltransferase [Source:HGNC Symbol;Acc:HGNC:20266]
222008	VSTM2A	V-set and transmembrane domain containing 2A [Source:HGNC Symbol;Acc:HGNC:28499]
55915	LANCL2	LanC like 2 [Source:HGNC Symbol;Acc:HGNC:6509]
84981	MIR22HG	MIR22 host gene [Source:HGNC Symbol;Acc:HGNC:28219]
1951	CELSR3	cadherin EGF LAG seven-pass G-type receptor 3 [Source:HGNC Symbol;Acc:HGNC:3230]
55041	PLEKHB2	pleckstrin homology domain containing B2 [Source:HGNC Symbol;Acc:HGNC:19236]
6876	TAGLN	transgelin [Source:HGNC Symbol;Acc:HGNC:11553]
57169	ZNFX1	zinc finger NFX1-type containing 1 [Source:HGNC Symbol;Acc:HGNC:29271]
22834	ZNF652	zinc finger protein 652 [Source:HGNC Symbol;Acc:HGNC:29147]
285268	ZNF621	zinc finger protein 621 [Source:HGNC Symbol;Acc:HGNC:24787]
5638	PRRG1	proline rich and Gla domain 1 [Source:HGNC Symbol;Acc:HGNC:9469]
57700	FAM160B1	family with sequence similarity 160 member B1 [Source:HGNC Symbol;Acc:HGNC:29320]
80256	FAM214B	family with sequence similarity 214 member B [Source:HGNC Symbol;Acc:HGNC:25666]
83607	AMMECR1L	AMMECR1 like [Source:HGNC Symbol;Acc:HGNC:28658]

## Sheet: Figure 3E Oxidative and HSF1
Overlap Results
Collection(s):	CP:REACTOME
# overlaps shown:	9
# genesets in collections:	1604
# genes in comparison (n):	86
# genes in universe (N):	40312
Gene Set Name	# Genes in Gene Set (K)	Description	# Genes in Overlap (k)	k/K	p-value	FDR q-value
REACTOME_RESPIRATORY_ELECTRON_TRANSPORT_ATP_SYNTHESIS_BY_CHEMIOSMOTIC_COUPLING_AND_HEAT_PRODUCTION_BY_UNCOUPLING_PROTEINS	127	Respiratory electron transport, ATP synthesis by chemiosmotic coupling, and heat production by uncoupling proteins.	5	0.0394	8.14e-06	0.0129
REACTOME_REGULATION_OF_HSF1_MEDIATED_HEAT_SHOCK_RESPONSE	82	Regulation of HSF1-mediated heat shock response	4	0.0488	2.97e-05	0.0129
REACTOME_THE_CITRIC_ACID_TCA_CYCLE_AND_RESPIRATORY_ELECTRON_TRANSPORT	178	The citric acid (TCA) cycle and respiratory electron transport	5	0.0281	4.14e-05	0.0129
REACTOME_EXPORT_OF_VIRAL_RIBONUCLEOPROTEINS_FROM_NUCLEUS	33	Export of Viral Ribonucleoproteins from Nucleus	3	0.0909	4.88e-05	0.0129
REACTOME_ASPARAGINE_N_LINKED_GLYCOSYLATION	305	Asparagine N-linked glycosylation	6	0.0197	5.05e-05	0.0129
REACTOME_POST_TRANSLATIONAL_PROTEIN_MODIFICATION	1435	Post-translational protein modification	12	0.0084	5.31e-05	0.0129
REACTOME_SLC_TRANSPORTER_DISORDERS	99	SLC transporter disorders	4	0.0404	6.23e-05	0.0129
REACTOME_CELLULAR_RESPONSE_TO_HEAT_STRESS	101	Cellular response to heat stress	4	0.0396	6.73e-05	0.0129
REACTOME_RESPIRATORY_ELECTRON_TRANSPORT	103	Respiratory electron transport	4	0.0388	7.27e-05	0.0129
Gene/Gene Set Overlap Matrix
Entrez Gene Id	Gene Symbol	Gene Description	REACTOME_RESPIRATORY_ELECTRON_TRANSPORT_ATP_SYNTHESIS_BY_CHEMIOSMOTIC_COUPLING_AND_HEAT_PRODUCTION_BY_UNCOUPLING_PROTEINS	REACTOME_REGULATION_OF_HSF1_MEDIATED_HEAT_SHOCK_RESPONSE	REACTOME_THE_CITRIC_ACID_TCA_CYCLE_AND_RESPIRATORY_ELECTRON_TRANSPORT	REACTOME_EXPORT_OF_VIRAL_RIBONUCLEOPROTEINS_FROM_NUCLEUS	REACTOME_ASPARAGINE_N_LINKED_GLYCOSYLATION	REACTOME_POST_TRANSLATIONAL_PROTEIN_MODIFICATION	REACTOME_SLC_TRANSPORTER_DISORDERS	REACTOME_CELLULAR_RESPONSE_TO_HEAT_STRESS	REACTOME_RESPIRATORY_ELECTRON_TRANSPORT
4514	MT-CO3	mitochondrially encoded cytochrome c oxidase III [Source:HGNC Symbol;Acc:HGNC:7422]	REACTOME_RESPIRATORY_ELECTRON_TRANSPORT_ATP_SYNTHESIS_BY_CHEMIOSMOTIC_COUPLING_AND_HEAT_PRODUCTION_BY_UNCOUPLING_PROTEINS		REACTOME_THE_CITRIC_ACID_TCA_CYCLE_AND_RESPIRATORY_ELECTRON_TRANSPORT						REACTOME_RESPIRATORY_ELECTRON_TRANSPORT
4536	MT-ND2	mitochondrially encoded NADH:ubiquinone oxidoreductase core subunit 2 [Source:HGNC Symbol;Acc:HGNC:7456]	REACTOME_RESPIRATORY_ELECTRON_TRANSPORT_ATP_SYNTHESIS_BY_CHEMIOSMOTIC_COUPLING_AND_HEAT_PRODUCTION_BY_UNCOUPLING_PROTEINS		REACTOME_THE_CITRIC_ACID_TCA_CYCLE_AND_RESPIRATORY_ELECTRON_TRANSPORT						REACTOME_RESPIRATORY_ELECTRON_TRANSPORT
29796	UQCR10	ubiquinol-cytochrome c reductase, complex III subunit X [Source:HGNC Symbol;Acc:HGNC:30863]	REACTOME_RESPIRATORY_ELECTRON_TRANSPORT_ATP_SYNTHESIS_BY_CHEMIOSMOTIC_COUPLING_AND_HEAT_PRODUCTION_BY_UNCOUPLING_PROTEINS		REACTOME_THE_CITRIC_ACID_TCA_CYCLE_AND_RESPIRATORY_ELECTRON_TRANSPORT						REACTOME_RESPIRATORY_ELECTRON_TRANSPORT
4519	MT-CYB	mitochondrially encoded cytochrome b [Source:HGNC Symbol;Acc:HGNC:7427]	REACTOME_RESPIRATORY_ELECTRON_TRANSPORT_ATP_SYNTHESIS_BY_CHEMIOSMOTIC_COUPLING_AND_HEAT_PRODUCTION_BY_UNCOUPLING_PROTEINS		REACTOME_THE_CITRIC_ACID_TCA_CYCLE_AND_RESPIRATORY_ELECTRON_TRANSPORT						REACTOME_RESPIRATORY_ELECTRON_TRANSPORT
4508	MT-ATP6	mitochondrially encoded ATP synthase membrane subunit 6 [Source:HGNC Symbol;Acc:HGNC:7414]	REACTOME_RESPIRATORY_ELECTRON_TRANSPORT_ATP_SYNTHESIS_BY_CHEMIOSMOTIC_COUPLING_AND_HEAT_PRODUCTION_BY_UNCOUPLING_PROTEINS		REACTOME_THE_CITRIC_ACID_TCA_CYCLE_AND_RESPIRATORY_ELECTRON_TRANSPORT
9883	POM121	POM121 transmembrane nucleoporin [Source:HGNC Symbol;Acc:HGNC:19702]		REACTOME_REGULATION_OF_HSF1_MEDIATED_HEAT_SHOCK_RESPONSE		REACTOME_EXPORT_OF_VIRAL_RIBONUCLEOPROTEINS_FROM_NUCLEUS		REACTOME_POST_TRANSLATIONAL_PROTEIN_MODIFICATION	REACTOME_SLC_TRANSPORTER_DISORDERS	REACTOME_CELLULAR_RESPONSE_TO_HEAT_STRESS
100101267	POM121C	POM121 transmembrane nucleoporin C [Source:HGNC Symbol;Acc:HGNC:34005]		REACTOME_REGULATION_OF_HSF1_MEDIATED_HEAT_SHOCK_RESPONSE		REACTOME_EXPORT_OF_VIRAL_RIBONUCLEOPROTEINS_FROM_NUCLEUS		REACTOME_POST_TRANSLATIONAL_PROTEIN_MODIFICATION	REACTOME_SLC_TRANSPORTER_DISORDERS	REACTOME_CELLULAR_RESPONSE_TO_HEAT_STRESS
3303	HSPA1A	heat shock protein family A (Hsp70) member 1A [Source:HGNC Symbol;Acc:HGNC:5232]		REACTOME_REGULATION_OF_HSF1_MEDIATED_HEAT_SHOCK_RESPONSE		REACTOME_EXPORT_OF_VIRAL_RIBONUCLEOPROTEINS_FROM_NUCLEUS				REACTOME_CELLULAR_RESPONSE_TO_HEAT_STRESS
3304	HSPA1B	heat shock protein family A (Hsp70) member 1B [Source:HGNC Symbol;Acc:HGNC:5233]		REACTOME_REGULATION_OF_HSF1_MEDIATED_HEAT_SHOCK_RESPONSE						REACTOME_CELLULAR_RESPONSE_TO_HEAT_STRESS
378	ARF4	ADP ribosylation factor 4 [Source:HGNC Symbol;Acc:HGNC:655]					REACTOME_ASPARAGINE_N_LINKED_GLYCOSYLATION	REACTOME_POST_TRANSLATIONAL_PROTEIN_MODIFICATION
84364	ARFGAP2	ADP ribosylation factor GTPase activating protein 2 [Source:HGNC Symbol;Acc:HGNC:13504]					REACTOME_ASPARAGINE_N_LINKED_GLYCOSYLATION	REACTOME_POST_TRANSLATIONAL_PROTEIN_MODIFICATION
11070	TMEM115	transmembrane protein 115 [Source:HGNC Symbol;Acc:HGNC:30055]					REACTOME_ASPARAGINE_N_LINKED_GLYCOSYLATION	REACTOME_POST_TRANSLATIONAL_PROTEIN_MODIFICATION
5537	PPP6C	protein phosphatase 6 catalytic subunit [Source:HGNC Symbol;Acc:HGNC:9323]					REACTOME_ASPARAGINE_N_LINKED_GLYCOSYLATION	REACTOME_POST_TRANSLATIONAL_PROTEIN_MODIFICATION
4758	NEU1	neuraminidase 1 [Source:HGNC Symbol;Acc:HGNC:7758]					REACTOME_ASPARAGINE_N_LINKED_GLYCOSYLATION	REACTOME_POST_TRANSLATIONAL_PROTEIN_MODIFICATION
29880	ALG5	ALG5 dolichyl-phosphate beta-glucosyltransferase [Source:HGNC Symbol;Acc:HGNC:20266]					REACTOME_ASPARAGINE_N_LINKED_GLYCOSYLATION	REACTOME_POST_TRANSLATIONAL_PROTEIN_MODIFICATION
27314	RAB30	RAB30, member RAS oncogene family [Source:HGNC Symbol;Acc:HGNC:9770]						REACTOME_POST_TRANSLATIONAL_PROTEIN_MODIFICATION
116442	RAB39B	RAB39B, member RAS oncogene family [Source:HGNC Symbol;Acc:HGNC:16499]						REACTOME_POST_TRANSLATIONAL_PROTEIN_MODIFICATION
23252	OTUD3	OTU deubiquitinase 3 [Source:HGNC Symbol;Acc:HGNC:29038]						REACTOME_POST_TRANSLATIONAL_PROTEIN_MODIFICATION
7070	THY1	Thy-1 cell surface antigen [Source:HGNC Symbol;Acc:HGNC:11801]						REACTOME_POST_TRANSLATIONAL_PROTEIN_MODIFICATION
6520	SLC3A2	solute carrier family 3 member 2 [Source:HGNC Symbol;Acc:HGNC:11026]							REACTOME_SLC_TRANSPORTER_DISORDERS
10479	SLC9A6	solute carrier family 9 member A6 [Source:HGNC Symbol;Acc:HGNC:11079]							REACTOME_SLC_TRANSPORTER_DISORDERS
5007	OSBP	oxysterol binding protein [Source:HGNC Symbol;Acc:HGNC:8503]
29956	CERS2	ceramide synthase 2 [Source:HGNC Symbol;Acc:HGNC:14076]
64784	CRTC3	CREB regulated transcription coactivator 3 [Source:HGNC Symbol;Acc:HGNC:26148]
79888	LPCAT1	lysophosphatidylcholine acyltransferase 1 [Source:HGNC Symbol;Acc:HGNC:25718]
10423	CDIPT	CDP-diacylglycerol--inositol 3-phosphatidyltransferase [Source:HGNC Symbol;Acc:HGNC:1769]
1543	CYP1A1	cytochrome P450 family 1 subfamily A member 1 [Source:HGNC Symbol;Acc:HGNC:2595]
25939	SAMHD1	SAM and HD domain containing deoxynucleoside triphosphate triphosphohydrolase 1 [Source:HGNC Symbol;Acc:HGNC:15925]
1191	CLU	clusterin [Source:HGNC Symbol;Acc:HGNC:2095]
7448	VTN	vitronectin [Source:HGNC Symbol;Acc:HGNC:12724]
5170	PDPK1	3-phosphoinositide dependent protein kinase 1 [Source:HGNC Symbol;Acc:HGNC:8816]
25800	SLC39A6	solute carrier family 39 member 6 [Source:HGNC Symbol;Acc:HGNC:18607]
9927	MFN2	mitofusin 2 [Source:HGNC Symbol;Acc:HGNC:16877]
23710	GABARAPL1	GABA type A receptor associated protein like 1 [Source:HGNC Symbol;Acc:HGNC:4068]
56990	CDC42SE2	CDC42 small effector 2 [Source:HGNC Symbol;Acc:HGNC:18547]
56006	SMG9	SMG9 nonsense mediated mRNA decay factor [Source:HGNC Symbol;Acc:HGNC:25763]
578	BAK1	BCL2 antagonist/killer 1 [Source:HGNC Symbol;Acc:HGNC:949]
1613	DAPK3	death associated protein kinase 3 [Source:HGNC Symbol;Acc:HGNC:2676]
123606	NIPA1	NIPA magnesium transporter 1 [Source:HGNC Symbol;Acc:HGNC:17043]
6047	RNF4	ring finger protein 4 [Source:HGNC Symbol;Acc:HGNC:10067]
114088	TRIM9	tripartite motif containing 9 [Source:HGNC Symbol;Acc:HGNC:16288]
29959	NRBP1	nuclear receptor binding protein 1 [Source:HGNC Symbol;Acc:HGNC:7993]
285268	ZNF621	zinc finger protein 621 [Source:HGNC Symbol;Acc:HGNC:24787]
220164	DOK6	docking protein 6 [Source:HGNC Symbol;Acc:HGNC:28301]
6855	SYP	synaptophysin [Source:HGNC Symbol;Acc:HGNC:11506]
4703	NEB	nebulin [Source:HGNC Symbol;Acc:HGNC:7720]
55739	NAXD	NAD(P)HX dehydratase [Source:HGNC Symbol;Acc:HGNC:25576]
10440	TIMM17A	translocase of inner mitochondrial membrane 17A [Source:HGNC Symbol;Acc:HGNC:17315]
10904	BLCAP	BLCAP apoptosis inducing factor [Source:HGNC Symbol;Acc:HGNC:1055]
10924	SMPDL3A	sphingomyelin phosphodiesterase acid like 3A [Source:HGNC Symbol;Acc:HGNC:17389]
1951	CELSR3	cadherin EGF LAG seven-pass G-type receptor 3 [Source:HGNC Symbol;Acc:HGNC:3230]
222008	VSTM2A	V-set and transmembrane domain containing 2A [Source:HGNC Symbol;Acc:HGNC:28499]
22834	ZNF652	zinc finger protein 652 [Source:HGNC Symbol;Acc:HGNC:29147]
23154	NCDN	neurochondrin [Source:HGNC Symbol;Acc:HGNC:17597]
25893	TRIM58	tripartite motif containing 58 [Source:HGNC Symbol;Acc:HGNC:24150]
30000	TNPO2	transportin 2 [Source:HGNC Symbol;Acc:HGNC:19998]
399979	SNX19	sorting nexin 19 [Source:HGNC Symbol;Acc:HGNC:21532]
4135	MAP6	microtubule associated protein 6 [Source:HGNC Symbol;Acc:HGNC:6868]
4616	GADD45B	growth arrest and DNA damage inducible beta [Source:HGNC Symbol;Acc:HGNC:4096]
5066	PAM	peptidylglycine alpha-amidating monooxygenase [Source:HGNC Symbol;Acc:HGNC:8596]
51335	NGRN	neugrin, neurite outgrowth associated [Source:HGNC Symbol;Acc:HGNC:18077]
51528	JKAMP	JNK1/MAPK8 associated membrane protein [Source:HGNC Symbol;Acc:HGNC:20184]
54442	KCTD5	potassium channel tetramerization domain containing 5 [Source:HGNC Symbol;Acc:HGNC:21423]
55041	PLEKHB2	pleckstrin homology domain containing B2 [Source:HGNC Symbol;Acc:HGNC:19236]
55238	SLC38A7	solute carrier family 38 member 7 [Source:HGNC Symbol;Acc:HGNC:25582]
55245	UQCC1	ubiquinol-cytochrome c reductase complex assembly factor 1 [Source:HGNC Symbol;Acc:HGNC:15891]
553115	PEF1	penta-EF-hand domain containing 1 [Source:HGNC Symbol;Acc:HGNC:30009]
55915	LANCL2	LanC like 2 [Source:HGNC Symbol;Acc:HGNC:6509]
5638	PRRG1	proline rich and Gla domain 1 [Source:HGNC Symbol;Acc:HGNC:9469]
57169	ZNFX1	zinc finger NFX1-type containing 1 [Source:HGNC Symbol;Acc:HGNC:29271]
57535	ELAPOR1	endosome-lysosome associated apoptosis and autophagy regulator 1 [Source:HGNC Symbol;Acc:HGNC:29618]
57700	FAM160B1	family with sequence similarity 160 member B1 [Source:HGNC Symbol;Acc:HGNC:29320]
58493	INIP	INTS3 and NABP interacting protein [Source:HGNC Symbol;Acc:HGNC:24994]
64224	HERPUD2	HERPUD family member 2 [Source:HGNC Symbol;Acc:HGNC:21915]
6876	TAGLN	transgelin [Source:HGNC Symbol;Acc:HGNC:11553]
79188	TMEM43	transmembrane protein 43 [Source:HGNC Symbol;Acc:HGNC:28472]
79939	SLC35E1	solute carrier family 35 member E1 [Source:HGNC Symbol;Acc:HGNC:20803]
80194	TMEM134	transmembrane protein 134 [Source:HGNC Symbol;Acc:HGNC:26142]
80256	FAM214B	family with sequence similarity 214 member B [Source:HGNC Symbol;Acc:HGNC:25666]
81551	STMN4	stathmin 4 [Source:HGNC Symbol;Acc:HGNC:16078]
81572	PDRG1	p53 and DNA damage regulated 1 [Source:HGNC Symbol;Acc:HGNC:16119]
83607	AMMECR1L	AMMECR1 like [Source:HGNC Symbol;Acc:HGNC:28658]
83787	ARMC10	armadillo repeat containing 10 [Source:HGNC Symbol;Acc:HGNC:21706]
84926	SPRYD3	SPRY domain containing 3 [Source:HGNC Symbol;Acc:HGNC:25920]
84981	MIR22HG	MIR22 host gene [Source:HGNC Symbol;Acc:HGNC:28219]
93210	PGAP3	post-GPI attachment to proteins phospholipase 3 [Source:HGNC Symbol;Acc:HGNC:23719]

## Sheet: Figuer 3F
A3SS	A5SS	MXE	RI	SE
173	138	173	254	1495
A3SS	A5SS	MXE	RI	SE
261	268	336	421	2829

[truncated: 2 more sheets: Figure 3G, Figure 3H]
