# Supplementary material for: Metabolic reprogramming of cancer cells by JMJD6-mediated pre-mRNA splicing associated with therapeutic response to splicing inhibitor
Source: eLife journal article supplement (doi:10.7554/elife.90993), 2023-11-01
Supplement: data1 [file Figure 3-Supplement 2B-data source .xlsx]

## Sheet: SRplot 081
pathway	enrichment	pvalue	count	class		SRplot - Bioinformatics Microservices
GO:0030424~axon		0.000285079	12	0		http://www.bioinformatics.com.cn/plot_basic_gopathway_enrichment_bubbleplot_081_en
GO:0043005~neuron projection		0.0479305	8	0
GO:0014037~Schwann cell differentiation		0.0834255	2	0		Output figure
								no facet				facet
						Note: 1, Input can be 4 or 5 columns, the fifth columns is optional. If the fifth column exists, it will output the facet plot. 2, enrichment is -log10(p), generatio is also accepted. 3, if points are black and white, please change log(p) into p using excel power function. 4, if no points appears, wider the figure.
						Questions or Cooperations, Contact us:
						ding@bioinformatics.com.cn
