# Supplementary material for: Metabolic reprogramming of cancer cells by JMJD6-mediated pre-mRNA splicing associated with therapeutic response to splicing inhibitor
Source: eLife journal article supplement (doi:10.7554/elife.90993), 2023-11-01
Supplement: data1 [file Figure 3F-source data.xlsx]

## Sheet: BE2C A3SS
id	geneid	genesymbol	chr	strand	longexonstart_0base	longexonend	shortes	shortee	flankinges	flankingee	v12	ijc_sample_1	sjc_sample_1	ijc_sample_2	sjc_sample_2	incformlen	skipformlen	pvalue	fdr	inclevel1	inclevel2	incleveldifference
52	ENSG00000198612.6	COPS8	chr2	+	238002305	238002840	238002732	238002840	237997247	237997296	52	29,22,23,41	2,5,4,1	11,22	0,0	526	99	1.41489e-05	0.00211256	0.732,0.453,0.52,0.885	1.0,1.0	-0.353
228	ENSG00000168566.11	SNRNP48	chr6	+	7599905	7601757	7601568	7601757	7595259	7595334	228	45,52,54,102	78,84,41,31	25,51	91,131	1762	99	1.18399e-09	1.23746e-06	0.031,0.034,0.069,0.156	0.015,0.021	0.055
233	ENSG00000177311.6	ZBTB38	chr3	+	141157084	141157207	141157109	141157207	141122768	141122873	233	2,3,0,1	4,5,3,19	8,4	3,5	124	99	0.000645552	0.032398	0.285,0.324,0.0,0.04	0.68,0.39	-0.373
278	ENSG00000149182.10	ARFGAP2	chr11	-	47195309	47195433	47195309	47195391	47196565	47196649	278	10,17,20,22	125,66,98,154	2,3	51,68	141	99	0.000256533	0.0189261	0.053,0.153,0.125,0.091	0.027,0.03	0.077
279	ENSG00000149182.10	ARFGAP2	chr11	-	47195309	47195466	47195309	47195391	47196565	47196649	279	10,10,23,16	125,66,98,154	1,3	51,68	174	99	0.000285513	0.0201174	0.044,0.079,0.118,0.056	0.011,0.024	0.057
421	ENSG00000135049.11	AGTPBP1	chr9	-	88270057	88270235	88270057	88270115	88272349	88272558	421	199,223,119,137	83,65,61,61	218,293	50,39	219	99	2.16912e-05	0.00277603	0.52,0.608,0.469,0.504	0.663,0.773	-0.193
440	ENSG00000107223.8	EDF1	chr9	-	139756570	139756948	139756570	139756797	139757357	139757451	440	515,600,519,721	1447,1483,1992,2693	292,301	1654,1675	250	99	1.037e-08	6.85515e-06	0.124,0.138,0.094,0.096	0.065,0.066	0.047
479	ENSG00000136051.9	KIAA1033	chr12	+	105514866	105514982	105514878	105514982	105514332	105514375	479	6,8,8,11	172,188,101,155	2,2	137,168	111	99	0.00073062	0.0330013	0.03,0.037,0.066,0.06	0.013,0.011	0.036
497	ENSG00000111912.14	NCOA7	chr6	+	126210084	126211127	126210117	126211127	126206304	126206489	497	195,153,41,55	194,199,164,225	121,117	74,93	132	99	4.53056e-06	0.000897816	0.43,0.366,0.158,0.155	0.551,0.485	-0.241
544	ENSG00000099953.5	MMP11	chr22	+	24123974	24124670	24124554	24124670	24123379	24123596	544	24,22,34,63	0,1,0,0	34,33	2,2	679	99	0.000108819	0.0100354	1.0,0.762,1.0,1.0	0.713,0.706	0.231
632	ENSG00000131503.16	ANKHD1	chr5	+	139818045	139818202	139818078	139818202	139815688	139815842	632	116,157,88,118	1,1,2,1	128,166	8,7	132	99	8.45403e-05	0.00803261	0.989,0.992,0.971,0.989	0.923,0.947	0.05
647	ENSG00000145331.9	TRMT10A	chr4	-	100480310	100480518	100480310	100480507	100484524	100484825	647	1,2,3,1	2,0,2,2	3,4	0,0	110	99	0.000692929	0.032398	0.31,1.0,0.574,0.31	1.0,1.0	-0.452
728	ENSG00000089682.12	RBM41	chrX	-	106312484	106313655	106312484	106312632	106331665	106332069	728	8,3,4,6	9,8,11,4	3,3	38,17	1122	99	0.00068039	0.032398	0.073,0.032,0.031,0.117	0.007,0.015	0.052
749	ENSG00000105856.9	HBP1	chr7	+	106820261	106820507	106820323	106820507	106814892	106815190	749	3,1,0,7	4,5,2,8	0,0	2,2	161	99	0.000401205	0.0235136	0.316,0.11,0.0,0.35	0.0,0.0	0.194
786	ENSG00000235501.1	RP4-639F20.1	chr1	+	95428480	95428826	95428534	95428826	95397427	95397541	786	3,3,0,1	0,2,3,4	3,4	0,0	153	99	8.6518e-07	0.000279699	1.0,0.493,0.0,0.139	1.0,1.0	-0.592
812	ENSG00000143436.6	MRPL9	chr1	-	151734437	151734501	151734437	151734486	151734580	151734631	812	3,0,0,1	1,5,1,0	1,1	0,0	114	99	5.39181e-05	0.00603786	0.723,0.0,0.0,1.0	1.0,1.0	-0.569
821	ENSG00000164116.12	GUCY1A3	chr4	+	156617907	156618274	156618086	156618274	156588497	156588571	821	509,553,240,323	9,12,0,3	357,375	0,1	278	99	0.00110474	0.0435153	0.953,0.943,1.0,0.975	1.0,0.993	-0.029
822	ENSG00000164116.12	GUCY1A3	chr4	+	156617957	156618274	156618086	156618274	156588497	156588571	822	276,269,114,169	9,12,0,3	177,198	0,1	228	99	0.000213071	0.0171304	0.93,0.907,1.0,0.961	1.0,0.989	-0.045
845	ENSG00000006015.13	C19orf60	chr19	+	18701083	18701743	18701663	18701743	18699804	18699887	845	30,29,26,42	23,20,25,10	23,22	46,32	679	99	0.000314932	0.0208824	0.16,0.175,0.132,0.38	0.068,0.091	0.132
859	ENSG00000237125.4	HAND2-AS1	chr4	+	174451950	174452229	174452117	174452229	174449750	174449990	859	485,488,450,723	4,2,13,21	571,637	0,1	266	99	1.28582e-06	0.000350583	0.978,0.989,0.928,0.928	1.0,0.996	-0.042
861	ENSG00000237125.4	HAND2-AS1	chr4	+	174451950	174452229	174452117	174452229	174451608	174451783	861	489,494,458,721	6,10,11,12	577,641	1,0	266	99	1.90447e-06	0.000434574	0.968,0.948,0.939,0.957	0.995,1.0	-0.045
879	ENSG00000237125.4	HAND2-AS1	chr4	+	174462625	174462981	174462828	174462981	174457998	174458121	879	457,438,310,349	51,35,46,61	449,500	32,26	302	99	0.000145245	0.0126504	0.746,0.804,0.688,0.652	0.821,0.863	-0.119
920	ENSG00000110844.9	PRPF40B	chr12	+	50026796	50027330	50027209	50027330	50026637	50026663	920	14,7,4,1	1,1,0,0	7,15	1,2	512	99	0.0010576	0.0425141	0.73,0.575,1.0,1.0	0.575,0.592	0.243
940	ENSG00000049323.11	LTBP1	chr2	+	33482350	33482578	33482509	33482578	33477743	33477911	940	3,3,4,3	2,2,3,4	6,6	0,1	258	99	8.34056e-05	0.00803261	0.365,0.365,0.338,0.223	1.0,0.697	-0.526
1007	ENSG00000085644.9	ZNF213	chr16	+	3188354	3188542	3188418	3188542	3187166	3187680	1007	1,0,0,1	4,5,8,9	3,3	4,3	163	99	3.45546e-05	0.00416716	0.132,0.0,0.0,0.063	0.313,0.378	-0.297
1056	ENSG00000087152.11	ATXN7L3	chr17	-	42272464	42272526	42272464	42272508	42273763	42273786	1056	8,2,3,6	2,2,1,1	0,0	1,2	117	99	2.14026e-07	9.58684e-05	0.772,0.458,0.717,0.835	0.0,0.0	0.696
1100	ENSG00000156873.11	PHKG2	chr16	+	30767675	30767841	30767687	30767841	30767502	30767593	1100	16,7,11,18	33,33,46,66	11,2	57,76	111	99	0.00131715	0.0488747	0.302,0.159,0.176,0.196	0.147,0.023	0.123
1118	ENSG00000125089.12	SH3TC1	chr4	+	8238004	8239397	8239200	8239397	8237159	8237282	1118	88,106,61,77	1,0,0,0	57,103	0,5	1295	99	0.000830285	0.0361578	0.871,1.0,1.0,1.0	1.0,0.612	0.162
1151	ENSG00000175048.12	ZDHHC14	chr6	+	158093755	158094561	158093800	158094561	158074556	158074659	1151	15,14,11,38	2,0,4,1	6,8	2,8	144	99	0.000647452	0.032398	0.838,1.0,0.654,0.963	0.673,0.407	0.324
1152	ENSG00000099875.10	MKNK2	chr19	-	2037469	2039855	2037469	2037828	2040132	2040176	1152	2160,1842,1649,2471	24,19,33,53	2381,2718	62,83	2126	99	0.000366057	0.0224564	0.807,0.819,0.699,0.685	0.641,0.604	0.13
1171	ENSG00000150967.13	ABCB9	chr12	-	123434334	123434465	123434334	123434451	123434997	123435112	1171	55,50,52,52	7,1,1,2	40,41	7,8	113	99	0.00111026	0.0435153	0.873,0.978,0.979,0.958	0.834,0.818	0.121
1306	ENSG00000162236.7	STX5	chr11	-	62598490	62598734	62598490	62598582	62599425	62599514	1306	40,31,49,85	5,0,1,4	66,43	0,0	251	99	0.00133669	0.049308	0.759,1.0,0.951,0.893	1.0,1.0	-0.099
1331	ENSG00000172375.8	C2CD2L	chr11	+	118984320	118984422	118984346	118984422	118983191	118983319	1331	17,23,18,29	4,3,4,2	12,8	0,0	125	99	0.000426602	0.0243506	0.771,0.859,0.781,0.92	1.0,1.0	-0.167
1398	ENSG00000135365.11	PHF21A	chr11	-	45967390	45967649	45967390	45967554	45970436	45970497	1398	16,23,6,17	6,8,16,34	18,23	4,3	194	99	0.000742016	0.0330013	0.576,0.595,0.161,0.203	0.697,0.796	-0.363
1423	ENSG00000141577.9	AZI1	chr17	-	79164992	79165150	79164992	79165135	79166117	79166192	1423	0,5,1,5	31,48,13,26	15,9	30,49	114	99	0.000954768	0.0388789	0.0,0.083,0.063,0.143	0.303,0.138	-0.148
1425	ENSG00000143224.13	PPOX	chr1	+	161137128	161137276	161137160	161137276	161136889	161137024	1425	0,2,0,3	19,21,14,7	2,8	8,11	131	99	0.00026737	0.0191745	0.0,0.067,0.0,0.245	0.159,0.355	-0.179
1475	ENSG00000169855.15	ROBO1	chr3	-	78684922	78685258	78684922	78685093	78688893	78689048	1475	525,530,302,342	37,60,31,59	269,334	17,15	264	99	0.000555466	0.0290277	0.842,0.768,0.785,0.685	0.856,0.893	-0.105
1595	ENSG00000109685.13	WHSC1	chr4	+	1954478	1955251	1955050	1955251	1953831	1953958	1595	57,49,32,45	78,89,47,75	28,43	107,100	671	99	0.000951014	0.0388789	0.097,0.075,0.091,0.081	0.037,0.06	0.038
1652	ENSG00000068366.15	ACSL4	chrX	-	108926364	108926895	108926364	108926781	108939372	108939425	1652	20,21,15,21	1,0,6,14	24,24	1,0	213	99	0.000350686	0.0223618	0.903,1.0,0.537,0.411	0.918,1.0	-0.246
1713	ENSG00000089335.16	ZNF302	chr19	+	35174056	35174143	35174059	35174143	35173681	35173802	1713	32,28,36,38	66,59,51,73	24,17	75,86	102	99	0.000713589	0.0328326	0.32,0.315,0.407,0.336	0.237,0.161	0.146
1747	ENSG00000041802.6	LSG1	chr3	-	194369409	194369533	194369409	194369482	194371609	194371753	1747	364,345,436,522	2,2,3,1	328,346	10,9	150	99	3.05732e-05	0.00375931	0.992,0.991,0.99,0.997	0.956,0.962	0.033
1771	ENSG00000127054.14	CPSF3L	chr1	-	1254675	1254904	1254675	1254813	1255835	1255909	1771	528,467,546,726	26,22,9,32	599,710	14,8	190	99	0.000353025	0.0223618	0.914,0.917,0.969,0.922	0.957,0.979	-0.037
1775	ENSG00000169255.9	B3GALNT1	chr3	-	160821214	160821305	160821214	160821302	160822106	160822194	1775	126,158,169,179	1,3,1,8	129,139	9,9	102	99	0.000688393	0.032398	0.992,0.981,0.994,0.956	0.933,0.937	0.046
1782	ENSG00000153975.5	ZUFSP	chr6	-	116987796	116988370	116987796	116988075	116989728	116989957	1782	295,303,203,278	16,26,11,19	202,238	4,6	394	99	0.000304976	0.0205646	0.822,0.745,0.823,0.786	0.927,0.909	-0.124
1829	ENSG00000120008.11	WDR11	chr10	+	122665387	122666367	122666287	122666367	122664830	122664928	1829	263,259,299,341	7,2,0,0	265,245	9,6	999	99	0.000568588	0.0294679	0.788,0.928,1.0,1.0	0.745,0.802	0.155
1831	ENSG00000167380.12	ZNF226	chr19	+	44669740	44669960	44669909	44669960	44669316	44669399	1831	28,7,12,14	10,6,10,1	7,8	0,1	268	99	0.000427135	0.0243506	0.508,0.301,0.307,0.838	1.0,0.747	-0.385
1844	ENSG00000125991.14	ERGIC3	chr20	+	34144647	34144880	34144743	34144880	34143977	34144042	1844	14,11,10,29	806,831,833,1122	27,31	747,825	195	99	0.00125109	0.0469796	0.009,0.007,0.006,0.013	0.018,0.019	-0.01
1906	ENSG00000149091.11	DGKZ	chr11	+	46400443	46400661	46400540	46400661	46400006	46400050	1906	9,7,15,7	45,61,45,67	2,1	59,61	196	99	9.90769e-06	0.00155328	0.092,0.055,0.144,0.05	0.017,0.008	0.073
1939	ENSG00000167491.13	GATAD2A	chr19	+	19576148	19576423	19576153	19576423	19567920	19568038	1939	24,13,20,12	1,3,8,0	9,15	0,0	104	99	0.000674532	0.032398	0.958,0.805,0.704,1.0	1.0,1.0	-0.133
1942	ENSG00000061273.13	HDAC7	chr12	-	48185653	48186452	48185653	48185787	48187151	48187371	1942	36,15,49,49	26,35,52,92	20,23	62,62	764	99	0.000677123	0.032398	0.152,0.053,0.109,0.065	0.04,0.046	0.052
1972	ENSG00000095059.11	DHPS	chr19	-	12786830	12786919	12786830	12786892	12787921	12788025	1972	78,84,51,81	8,6,9,2	120,95	0,3	126	99	0.000118499	0.0107696	0.885,0.917,0.817,0.97	1.0,0.961	-0.083
2054	ENSG00000168066.16	SF1	chr11	-	64532077	64533627	64532077	64532990	64534663	64534723	2054	173,183,157,206	10,4,5,6	225,188	1,2	736	99	0.00067836	0.032398	0.699,0.86,0.809,0.822	0.968,0.927	-0.15
2191	ENSG00000164327.8	RICTOR	chr5	-	38945592	38945826	38945592	38945712	38946569	38946654	2191	29,42,44,67	3,3,3,6	27,30	0,0	213	99	0.000162443	0.0137659	0.818,0.867,0.872,0.838	1.0,1.0	-0.151
2247	ENSG00000147180.12	ZNF711	chrX	+	84501935	84502657	84502552	84502657	84500908	84501028	2247	184,189,238,354	23,16,2,16	165,152	46,29	716	99	6.04599e-06	0.00108327	0.525,0.62,0.943,0.754	0.332,0.42	0.335
2286	ENSG00000137868.14	STRA6	chr15	-	74488348	74488595	74488348	74488461	74489678	74489764	2286	211,181,80,154	7,17,4,6	80,78	0,1	233	99	7.70666e-05	0.00775936	0.928,0.819,0.895,0.916	1.0,0.971	-0.096
2384	ENSG00000075826.12	SEC31B	chr10	-	102267664	102267808	102267664	102267805	102268763	102268859	2384	1,8,0,8	1,2,1,1	0,1	4,2	102	99	7.79524e-05	0.00775936	0.493,0.795,0.0,0.886	0.0,0.327	0.38
2513	ENSG00000011332.15	DPF1	chr19	-	38702919	38703031	38702919	38703001	38704283	38704396	2513	28,21,10,17	63,57,37,31	7,11	65,56	129	99	0.000405404	0.0235397	0.254,0.22,0.172,0.296	0.076,0.131	0.132
2519	ENSG00000138380.13	CARF	chr2	+	203789019	203789138	203789079	203789138	203782599	203782766	2519	5,3,2,6	7,11,16,9	3,6	2,0	159	99	0.00109042	0.0435153	0.308,0.145,0.072,0.293	0.483,1.0	-0.537
2543	ENSG00000129255.10	MPDU1	chr17	+	7489973	7490095	7490009	7490095	7489263	7489396	2543	38,52,4,10	308,287,83,142	5,6	231,215	135	99	5.25355e-09	4.70643e-06	0.083,0.117,0.034,0.049	0.016,0.02	0.053
2683	ENSG00000163110.10	PDLIM5	chr4	+	95496766	95497185	95497093	95497185	95494501	95494544	2683	1036,1057,818,1109	64,81,37,60	556,530	16,12	426	99	2.14243e-05	0.00277603	0.79,0.752,0.837,0.811	0.89,0.911	-0.103
2708	ENSG00000134779.10	TPGS2	chr18	-	34366535	34367042	34366535	34366945	34378411	34378572	2708	67,79,18,19	7,12,2,2	40,53	0,2	196	99	0.000316349	0.0208824	0.829,0.769,0.82,0.828	1.0,0.93	-0.154
2750	ENSG00000175550.3	DRAP1	chr11	+	65687813	65687933	65687886	65687933	65687418	65687468	2750	181,203,136,219	2,3,0,1	130,128	8,2	172	99	0.000887132	0.037088	0.981,0.975,1.0,0.992	0.903,0.974	0.048
3000	ENSG00000196154.7	S100A4	chr1	-	153516088	153516415	153516088	153516399	153517129	153517285	3000	26,22,7,12	410,385,157,244	1,5	162,171	115	99	0.000770083	0.0340084	0.052,0.047,0.037,0.041	0.005,0.025	0.029
3086	ENSG00000130475.10	FCHO1	chr19	+	17899078	17899366	17899092	17899366	17898490	17898655	3086	0,0,0,0	8,3,3,3	4,3	13,5	113	99	5.02089e-06	0.000954121	0.0,0.0,0.0,0.0	0.212,0.345	-0.278
3095	ENSG00000138688.11	KIAA1109	chr4	+	123145652	123145832	123145655	123145832	123141487	123141625	3095	7,16,9,16	0,2,0,0	4,10	5,3	102	99	2.47541e-06	0.000520241	1.0,0.886,1.0,1.0	0.437,0.764	0.371
3104	ENSG00000051825.10	MPHOSPH9	chr12	-	123705918	123706442	123705918	123706270	123707584	123707674	3104	389,330,414,496	8,15,17,15	654,652	6,8	271	99	5.86609e-05	0.00634246	0.947,0.889,0.899,0.924	0.976,0.968	-0.057
3180	ENSG00000076864.15	RAP1GAP	chr1	-	21924453	21924557	21924453	21924533	21924892	21924995	3180	3,3,9,11	1,0,1,0	13,14	5,2	123	99	0.000220258	0.0172654	0.707,1.0,0.879,1.0	0.677,0.849	0.133
3306	ENSG00000083312.13	TNPO1	chr5	+	72147064	72147146	72147070	72147146	72144211	72144325	3306	81,90,10,29	538,544,350,452	94,106	533,534	105	99	4.50679e-05	0.00513856	0.124,0.135,0.026,0.057	0.143,0.158	-0.065
3319	ENSG00000032444.11	PNPLA6	chr19	+	7600674	7600906	7600818	7600906	7600394	7600463	3319	3,15,1,2	44,39,22,30	11,11	12,19	243	99	3.92952e-05	0.00456333	0.027,0.135,0.018,0.026	0.272,0.191	-0.18
3338	ENSG00000102081.9	FMR1	chrX	+	147026388	147026571	147026463	147026571	147024650	147024846	3338	78,73,164,198	4,7,18,18	122,95	26,18	174	99	0.000738795	0.0330013	0.917,0.856,0.838,0.862	0.728,0.75	0.129
3399	ENSG00000171680.16	PLEKHG5	chr1	-	6527884	6527958	6527884	6527953	6529101	6529301	3399	0,0,1,2	1,1,1,2	6,3	5,1	104	99	0.00124219	0.0469264	0.0,0.0,0.488,0.488	0.533,0.741	-0.393
3410	ENSG00000003056.3	M6PR	chr12	-	9092958	9094536	9092958	9093465	9095011	9095138	3410	1436,1345,4564,5865	18,23,8,9	3574,3889	6,7	1170	99	0.00025964	0.0189326	0.871,0.832,0.98,0.982	0.981,0.979	-0.064
3477	ENSG00000243989.3	ACY1	chr3	+	52019376	52019481	52019416	52019481	52018062	52018174	3477	19,25,35,37	0,0,2,0	41,41	2,6	139	99	0.000226737	0.0173398	1.0,1.0,0.926,1.0	0.936,0.83	0.099
3518	ENSG00000203705.6	TATDN3	chr1	+	212985568	212985670	212985592	212985670	212977937	212977993	3518	7,9,17,24	2,4,2,1	10,7	0,0	123	99	0.000862433	0.0365427	0.738,0.644,0.872,0.951	1.0,1.0	-0.199
3557	ENSG00000250067.7	YJEFN3	chr19	+	19643912	19645953	19645842	19645953	19643440	19643549	3557	14,7,22,15	3,1,6,10	6,14	0,0	2029	99	1.94037e-06	0.000434574	0.185,0.255,0.152,0.068	1.0,1.0	-0.835
3590	ENSG00000171163.11	ZNF692	chr1	-	249151432	249151696	249151432	249151635	249152026	249152058	3590	51,35,25,46	6,1,4,2	46,39	1,0	160	99	0.00136325	0.0497031	0.84,0.956,0.795,0.934	0.966,1.0	-0.102
3605	ENSG00000133027.13	PEMT	chr17	-	17410482	17410516	17410482	17410513	17412747	17412859	3605	0,0,0,2	1,1,3,0	2,4	0,0	102	99	1.39537e-06	0.000364598	0.0,0.0,0.0,1.0	1.0,1.0	-0.75
3700	ENSG00000112514.11	CUTA	chr6	-	33385257	33385593	33385257	33385472	33385863	33386094	3700	193,130,250,251	354,230,394,338	78,110	288,374	220	99	4.51777e-10	6.41143e-07	0.197,0.203,0.222,0.25	0.109,0.117	0.105
3708	ENSG00000135632.7	SMYD5	chr2	+	73447079	73447318	73447197	73447318	73445988	73446097	3708	29,18,8,12	6,0,0,2	10,9	0,0	217	99	0.00122277	0.0464726	0.688,1.0,1.0,0.732	1.0,1.0	-0.145
3756	ENSG00000180879.9	SSR4	chrX	+	153061888	153062007	153061893	153062007	153061117	153061316	3756	65,52,70,91	45,53,61,62	65,85	16,20	104	99	2.00604e-08	1.14363e-05	0.579,0.483,0.522,0.583	0.795,0.802	-0.257
3821	ENSG00000155366.12	RHOC	chr1	-	113247721	113247823	113247721	113247745	113249699	113249724	3821	97,84,44,89	9,5,4,6	34,45	0,1	177	99	0.000507374	0.0274288	0.858,0.904,0.86,0.892	1.0,0.962	-0.103
3880	ENSG00000168389.13	MFSD2A	chr1	+	40433299	40433588	40433475	40433588	40432757	40432841	3880	30,35,24,46	6,1,2,1	15,22	0,0	275	99	0.000659368	0.032398	0.643,0.926,0.812,0.943	1.0,1.0	-0.169
3884	ENSG00000144895.7	EIF2A	chr3	+	150285799	150285833	150285803	150285833	150285688	150285716	3884	18,23,15,9	0,6,2,2	43,16	0,0	103	99	0.000389831	0.0231261	1.0,0.787,0.878,0.812	1.0,1.0	-0.131
3930	ENSG00000138161.8	CUZD1	chr10	-	124596346	124596564	124596346	124596415	124596919	124597070	3930	15,10,4,12	2,5,2,3	14,11	0,1	248	99	0.000296193	0.0204113	0.75,0.444,0.444,0.615	1.0,0.815	-0.344
4014	ENSG00000125122.10	LRRC29	chr16	-	67243950	67244251	67243950	67244225	67257728	67257830	4014	2,0,7,2	10,6,7,8	0,0	2,7	125	99	0.000534085	0.0283834	0.137,0.0,0.442,0.165	0.0,0.0	0.186
4206	ENSG00000255330.4	SOGA3	chr6	-	127774991	127775246	127774991	127775232	127794224	127794536	4206	176,211,181,185	10,7,12,11	214,222	2,5	113	99	0.000731917	0.0330013	0.939,0.964,0.93,0.936	0.989,0.975	-0.04
4326	ENSG00000110888.13	CAPRIN2	chr12	-	30867892	30868078	30867892	30868075	30869441	30869610	4326	2,5,9,15	7,6,10,16	0,1	8,2	102	99	0.000343901	0.022233	0.217,0.447,0.466,0.476	0.0,0.327	0.238
4327	ENSG00000110888.13	CAPRIN2	chr12	-	30872012	30873849	30872012	30872159	30876192	30876248	4327	22,21,37,69	0,0,1,0	42,21	5,2	1789	99	1.09315e-08	6.85515e-06	1.0,1.0,0.672,1.0	0.317,0.368	0.576
4380	ENSG00000077232.12	DNAJC10	chr2	+	183604271	183605115	183605025	183605115	183600975	183601113	4380	7,19,52,29	88,113,80,115	14,17	160,161	853	99	5.45933e-06	0.00100692	0.009,0.019,0.07,0.028	0.01,0.012	0.021
4387	ENSG00000115368.5	WDR75	chr2	+	190313970	190315694	190315628	190315694	190313104	190313234	4387	107,102,216,269	578,493,464,588	93,114	569,650	1757	99	6.77889e-07	0.000236169	0.01,0.012,0.026,0.025	0.009,0.01	0.009
4388	ENSG00000115368.5	WDR75	chr2	+	190313970	190315694	190315628	190315694	190313526	190313560	4388	102,96,197,263	0,0,0,1	86,108	2,3	1757	99	2.14545e-05	0.00277603	1.0,1.0,1.0,0.937	0.708,0.67	0.295
4468	ENSG00000011275.14	RNF216	chr7	-	5780603	5781446	5780603	5781275	5792476	5792610	4468	125,153,155,230	75,51,69,93	140,151	29,38	270	99	0.000469427	0.0259036	0.379,0.524,0.452,0.476	0.639,0.593	-0.158
4470	ENSG00000132768.9	DPH2	chr1	+	44436577	44436861	44436637	44436861	44436267	44436489	4470	10,9,7,9	8,7,3,5	9,2	0,1	159	99	0.000697453	0.032398	0.438,0.445,0.592,0.528	1.0,0.555	-0.277
4605	ENSG00000163138.14	PACRGL	chr4	+	20703348	20703507	20703380	20703507	20702081	20702240	4605	0,3,0,3	1,1,3,2	1,1	0,0	131	99	5.82206e-07	0.000214765	0.0,0.694,0.0,0.531	1.0,1.0	-0.694
4713	ENSG00000167549.14	CORO6	chr17	-	27943955	27945650	27943955	27944060	27945807	27945989	4713	25,32,33,61	1,0,0,2	34,31	3,4	1689	99	6.19892e-05	0.00658871	0.594,1.0,1.0,0.641	0.399,0.312	0.453
4770	ENSG00000169169.10	CPT1C	chr19	+	50208263	50208371	50208296	50208371	50207966	50208044	4770	36,29,43,50	0,1,0,1	22,34	2,8	132	99	9.26172e-07	0.000279699	1.0,0.956,1.0,0.974	0.892,0.761	0.156
4963	ENSG00000006712.10	PAF1	chr19	-	39880708	39880929	39880708	39880801	39881457	39881794	4963	211,212,124,183	4,1,0,6	171,195	5,15	227	99	0.00017275	0.0142541	0.958,0.989,1.0,0.93	0.937,0.85	0.076
5074	ENSG00000221978.7	CCNL2	chr1	-	1326145	1328183	1326145	1326245	1328775	1328840	5074	2758,2795,3460,4683	32,37,14,6	2125,2184	40,32	2037	99	8.63025e-06	0.00142422	0.807,0.786,0.923,0.974	0.721,0.768	0.128
5132	ENSG00000101109.7	STK4	chr20	+	43601847	43602074	43601941	43602074	43600718	43600799	5132	6,1,2,2	5,4,2,3	3,1	0,0	193	99	6.03689e-08	2.9121e-05	0.381,0.114,0.339,0.255	1.0,1.0	-0.728
5393	ENSG00000028203.13	VEZT	chr12	+	95692869	95694948	95693940	95694948	95689826	95690034	5393	74,66,52,83	155,176,94,122	65,47	227,244	1170	99	9.81243e-07	0.000279699	0.039,0.031,0.045,0.054	0.024,0.016	0.022
5416	ENSG00000050130.13	JKAMP	chr14	+	59953430	59953522	59953448	59953522	59951707	59951834	5416	68,74,96,132	27,24,14,33	43,72	7,4	117	99	0.00137528	0.0498518	0.681,0.723,0.853,0.772	0.839,0.938	-0.131
5432	ENSG00000223960.2	AC009948.5	chr2	+	179295404	179295616	179295421	179295616	179291092	179291232	5432	0,4,2,4	8,15,4,6	0,0	2,9	116	99	0.000483245	0.0263515	0.0,0.185,0.299,0.363	0.0,0.0	0.212
5447	ENSG00000167508.6	MVD	chr16	-	88722512	88722969	88722512	88722712	88723843	88723990	5447	21,15,26,38	66,79,116,167	8,8	84,83	356	99	0.000667802	0.032398	0.081,0.05,0.059,0.06	0.026,0.026	0.037
5477	ENSG00000100099.16	HPS4	chr22	-	26866684	26866888	26866684	26866779	26868267	26868384	5477	12,11,7,14	88,66,72,66	2,3	64,78	208	99	0.000137269	0.0121692	0.061,0.073,0.044,0.092	0.015,0.018	0.051
5498	ENSG00000109065.7	NAT9	chr17	-	72768098	72768178	72768098	72768116	72768356	72768416	5498	78,72,90,126	7,20,9,10	54,68	26,22	161	99	3.67935e-05	0.00435344	0.873,0.689,0.86,0.886	0.561,0.655	0.219
5499	ENSG00000109065.7	NAT9	chr17	-	72768098	72768193	72768098	72768116	72768356	72768416	5499	154,157,204,251	7,20,9,10	129,146	26,22	176	99	8.2104e-06	0.00139155	0.925,0.815,0.927,0.934	0.736,0.789	0.138
5563	ENSG00000197183.8	C20orf112	chr20	-	31052582	31052937	31052582	31052920	31062403	31062545	5563	8,2,13,15	55,35,67,124	0,1	27,31	116	99	0.000137779	0.0121692	0.11,0.047,0.142,0.094	0.0,0.027	0.085
5637	ENSG00000131626.11	PPFIA1	chr11	+	70218317	70218496	70218320	70218496	70208393	70208594	5637	1,10,9,15	56,81,34,74	0,2	56,57	102	99	1.73834e-05	0.00247753	0.017,0.107,0.204,0.164	0.0,0.033	0.106
5702	ENSG00000166938.8	DIS3L	chr15	+	66599099	66599290	66599234	66599290	66587325	66587479	5702	42,47,43,83	5,5,2,4	55,66	1,0	234	99	0.000203313	0.0165581	0.78,0.799,0.901,0.898	0.959,1.0	-0.135
5703	ENSG00000166938.8	DIS3L	chr15	+	66599161	66599290	66599234	66599290	66587325	66587479	5703	53,60,66,131	5,5,2,4	80,105	1,0	172	99	0.000655205	0.032398	0.859,0.874,0.95,0.95	0.979,1.0	-0.081
5746	ENSG00000112031.11	MTRF1L	chr6	-	153316270	153316454	153316270	153316429	153319684	153319764	5746	127,122,107,182	112,81,90,135	150,110	63,58	124	99	0.000842674	0.0361946	0.475,0.546,0.487,0.518	0.655,0.602	-0.122
5828	ENSG00000141002.14	TCF25	chr16	+	89961445	89961545	89961490	89961545	89960135	89960266	5828	230,239,336,521	6,10,6,11	266,278	16,24	144	99	1.47505e-05	0.00215117	0.963,0.943,0.975,0.97	0.92,0.888	0.059
5862	ENSG00000197603.9	C5orf42	chr5	-	37157771	37157970	37157771	37157916	37158325	37158447	5862	27,14,15,23	2,1,1,0	18,23	7,2	153	99	0.000810297	0.0355341	0.897,0.901,0.907,1.0	0.625,0.882	0.173
5920	ENSG00000104936.13	DMPK	chr19	-	46274228	46274318	46274228	46274314	46274607	46274654	5920	2,5,5,6	5,6,6,8	10,10	3,2	103	99	0.000717281	0.0328326	0.278,0.445,0.445,0.419	0.762,0.828	-0.398
6042	ENSG00000196998.11	WDR45	chrX	-	48934303	48934463	48934303	48934412	48935301	48935406	6042	2,0,5,6	10,10,2,5	0,0	2,4	150	99	0.000357806	0.022438	0.117,0.0,0.623,0.442	0.0,0.0	0.295
6043	ENSG00000196998.11	WDR45	chrX	-	48934303	48934484	48934303	48934412	48935301	48935406	6043	3,0,5,8	10,10,2,5	0,0	2,4	171	99	0.0002238	0.0173266	0.148,0.0,0.591,0.481	0.0,0.0	0.305
6096	ENSG00000028310.13	BRD9	chr5	-	889701	889881	889701	889762	891269	891402	6096	29,13,26,26	109,145,90,118	12,11	115,141	218	99	0.000690883	0.032398	0.108,0.039,0.116,0.091	0.045,0.034	0.049
6121	ENSG00000099204.14	ABLIM1	chr10	-	116207638	116207785	116207638	116207779	116211382	116211430	6121	57,74,83,130	97,105,131,211	54,40	164,148	105	99	2.48879e-06	0.000520241	0.357,0.399,0.374,0.367	0.237,0.203	0.154
6162	ENSG00000142046.10	TMEM91	chr19	+	41889465	41889988	41889767	41889988	41888676	41888826	6162	9,3,5,6	4,2,0,2	7,7	0,0	401	99	1.77385e-06	0.000434574	0.357,0.27,1.0,0.426	1.0,1.0	-0.487
6165	ENSG00000142046.10	TMEM91	chr19	+	41889619	41889988	41889767	41889988	41888676	41888826	6165	9,2,5,6	4,2,0,2	5,7	0,0	247	99	1.94265e-05	0.00264834	0.474,0.286,1.0,0.546	1.0,1.0	-0.423
6233	ENSG00000112531.12	QKI	chr6	+	163986977	163987827	163987752	163987827	163984451	163984751	6233	546,535,1426,1887	118,151,196,242	317,345	175,165	874	99	4.35784e-11	1.3664e-07	0.344,0.286,0.452,0.469	0.17,0.191	0.207
6317	ENSG00000123636.13	BAZ2B	chr2	-	160304752	160304920	160304752	160304914	160335085	160335232	6317	9,5,6,5	2,3,3,0	5,8	0,0	105	99	0.000253506	0.0189254	0.809,0.611,0.653,1.0	1.0,1.0	-0.232
6408	ENSG00000135905.14	DOCK10	chr2	-	225670124	225670246	225670124	225670219	225670842	225670954	6408	5,1,1,0	5,3,2,2	5,11	0,1	126	99	4.11434e-07	0.000172007	0.44,0.208,0.282,0.0	1.0,0.896	-0.716
6439	ENSG00000185722.12	ANKFY1	chr17	-	4085475	4085647	4085475	4085644	4086692	4086846	6439	2,0,2,0	26,18,19,20	4,4	23,17	102	99	0.000839414	0.0361946	0.069,0.0,0.093,0.0	0.144,0.186	-0.124
6530	ENSG00000067141.12	NEO1	chr15	+	73528627	73528847	73528687	73528847	73470647	73470768	6530	2,2,6,7	2,3,9,11	5,1	0,1	159	99	0.00128989	0.0481484	0.384,0.293,0.293,0.284	1.0,0.384	-0.378
6604	ENSG00000213585.6	VDAC1	chr5	-	133328636	133328709	133328636	133328706	133340177	133340326	6604	47,74,60,110	6,2,8,7	76,71	0,2	102	99	0.000470899	0.0259036	0.884,0.973,0.879,0.938	1.0,0.972	-0.068
6643	ENSG00000232940.1	HCG25	chr6	+	33218385	33218488	33218392	33218488	33217566	33217666	6643	5,4,11,25	2,0,2,7	2,10	0,0	106	99	0.000458505	0.0258945	0.7,1.0,0.837,0.769	1.0,1.0	-0.173
6658	ENSG00000166411.9	IDH3A	chr15	+	78449249	78449973	78449889	78449973	78447554	78447617	6658	47,67,114,131	348,394,330,595	19,38	236,226	739	99	0.000904706	0.0375723	0.018,0.022,0.044,0.029	0.011,0.022	0.012
6689	ENSG00000155329.7	ZCCHC10	chr5	-	132335823	132335893	132335823	132335865	132342450	132342612	6689	12,20,8,5	100,78,44,60	16,28	60,44	127	99	0.0010488	0.0424325	0.086,0.167,0.124,0.061	0.172,0.332	-0.143
6865	ENSG00000149499.7	EML3	chr11	-	62378558	62378819	62378558	62378816	62378896	62379068	6865	24,16,11,18	38,32,14,18	5,4	22,21	102	99	0.00110001	0.0435153	0.38,0.327,0.433,0.493	0.181,0.156	0.24
6879	ENSG00000146067.11	FAM193B	chr5	-	176965905	176966148	176965905	176966043	176981249	176981508	6879	65,43,48,38	1,0,0,1	42,53	5,3	204	99	5.66226e-05	0.00622948	0.969,1.0,1.0,0.949	0.803,0.896	0.13
6890	ENSG00000170919.11	TPT1-AS1	chr13	+	45951195	45951350	45951246	45951350	45944093	45944317	6890	12,3,3,17	4,0,5,2	15,4	0,0	150	99	8.45081e-05	0.00803261	0.664,1.0,0.284,0.849	1.0,1.0	-0.301
6898	ENSG00000178904.14	DPY19L3	chr19	+	32958379	32959719	32959636	32959719	32955633	32955690	6898	58,53,96,131	72,48,24,26	52,84	104,96	1356	99	9.69131e-07	0.000279699	0.056,0.075,0.226,0.269	0.035,0.06	0.109
6951	ENSG00000116396.9	KCNC4	chr1	+	110774842	110776666	110775532	110776666	110768596	110768800	6951	32,17,29,41	2,6,2,3	32,26	0,1	789	99	0.000390906	0.0231261	0.668,0.262,0.645,0.632	1.0,0.765	-0.331
7034	ENSG00000082269.12	FAM135A	chr6	+	71234045	71236401	71234633	71236401	71233669	71233824	7034	112,115,294,379	115,141,61,56	257,278	38,41	687	99	0.000368843	0.0224564	0.123,0.105,0.41,0.494	0.494,0.494	-0.211
7182	ENSG00000170271.6	FAXDC2	chr5	-	154214402	154214679	154214402	154214494	154217690	154217738	7182	23,22,7,7	32,37,6,12	1,5	30,20	284	99	7.74822e-06	0.0013497	0.2,0.172,0.289,0.169	0.011,0.08	0.162
7192	ENSG00000134802.13	SLC43A3	chr11	-	57193461	57193862	57193461	57193825	57194060	57194125	7192	1,4,1,3	1,9,5,6	0,0	5,5	136	99	0.000320059	0.0209072	0.421,0.244,0.127,0.267	0.0,0.0	0.265
7225	ENSG00000137494.9	ANKRD42	chr11	+	82923694	82926242	82924020	82926242	82922336	82922472	7225	61,28,49,42	3,0,2,1	17,26	2,7	425	99	0.000361457	0.0224425	0.826,1.0,0.851,0.907	0.664,0.464	0.332
7289	ENSG00000185619.13	PCGF3	chr4	+	727672	728816	728719	728816	727460	727578	7289	282,242,209,300	140,145,96,147	272,246	94,77	1146	99	0.00116766	0.0454808	0.148,0.126,0.158,0.15	0.2,0.216	-0.063
7344	ENSG00000198270.8	TMEM116	chr12	-	112371689	112374634	112371689	112371834	112375964	112376014	7344	17,10,33,64	2,2,0,1	11,14	0,0	2899	99	0.000106787	0.00999496	0.225,0.146,1.0,0.686	1.0,1.0	-0.486
7365	ENSG00000132199.14	ENOSF1	chr18	-	690548	690745	690548	690631	693881	693908	7365	11,4,5,7	0,0,0,0	4,9	3,1	213	99	0.000850578	0.0362855	1.0,1.0,1.0,1.0	0.383,0.807	0.405
7414	ENSG00000196547.10	MAN2A2	chr15	+	91455746	91455894	91455771	91455894	91455272	91455509	7414	6,5,7,6	39,37,16,20	1,1	30,25	124	99	0.000382413	0.0230588	0.109,0.097,0.259,0.193	0.026,0.031	0.136
7424	ENSG00000100211.6	CBY1	chr22	+	39066771	39066994	39066888	39066994	39064021	39064137	7424	47,52,41,38	117,109,126,151	18,33	149,142	216	99	0.00016728	0.0139868	0.155,0.179,0.13,0.103	0.052,0.096	0.068
7452	ENSG00000174996.7	KLC2	chr11	+	66026017	66026293	66026054	66026293	66025173	66025342	7452	25,28,21,15	65,59,20,41	7,8	47,36	136	99	0.00135898	0.0497031	0.219,0.257,0.433,0.21	0.098,0.139	0.161
7498	ENSG00000140332.11	TLE3	chr15	-	70358352	70358557	70358352	70358554	70366871	70366946	7498	13,14,24,40	2,0,3,6	12,21	0,0	102	99	0.00121293	0.0463796	0.863,1.0,0.886,0.866	1.0,1.0	-0.096
7558	ENSG00000015153.10	YAF2	chr12	-	42604349	42604482	42604349	42604421	42629415	42629557	7558	7,7,21,14	0,0,3,6	12,23	0,0	160	99	0.000545458	0.0287443	1.0,1.0,0.812,0.591	1.0,1.0	-0.149
7578	ENSG00000092148.8	HECTD1	chr14	-	31597817	31598654	31597817	31598513	31602443	31602620	7578	173,182,82,111	150,198,114,182	138,199	94,132	240	99	7.13011e-05	0.00732998	0.322,0.275,0.229,0.201	0.377,0.383	-0.123
7615	ENSG00000064102.10	ASUN	chr12	-	27067340	27067511	27067340	27067465	27070284	27070374	7615	56,42,57,90	8,3,18,31	69,67	5,4	145	99	0.00093337	0.0385077	0.827,0.905,0.684,0.665	0.904,0.92	-0.142
7759	ENSG00000166582.5	CENPV	chr17	-	16251929	16252647	16251929	16251999	16253244	16253343	7759	1260,1262,932,1377	222,232,244,270	761,768	298,311	747	99	4.15979e-10	6.41143e-07	0.429,0.419,0.336,0.403	0.253,0.247	0.147
7845	ENSG00000152223.8	EPG5	chr18	-	43462238	43462452	43462238	43462396	43464581	43464776	7845	10,7,1,5	2,0,1,4	8,3	0,0	155	99	0.000884488	0.037088	0.762,1.0,0.39,0.444	1.0,1.0	-0.351
7852	ENSG00000105393.11	BABAM1	chr19	+	17386585	17386634	17386597	17386634	17384915	17384994	7852	6,3,1,4	1,3,2,4	4,3	0,0	111	99	4.58143e-06	0.000897816	0.843,0.471,0.308,0.471	1.0,1.0	-0.477
7906	ENSG00000183258.7	DDX41	chr5	-	176942186	176942362	176942186	176942259	176942929	176942990	7906	55,43,25,60	4,10,2,0	33,21	0,0	202	99	0.000231816	0.0175147	0.871,0.678,0.86,1.0	1.0,1.0	-0.148
7924	ENSG00000090263.11	MRPS33	chr7	-	140710218	140710460	140710218	140710417	140714350	140714479	7924	250,244,423,461	11,12,17,32	271,264	4,3	142	99	1.83526e-05	0.00255753	0.941,0.934,0.945,0.909	0.979,0.984	-0.049
7948	ENSG00000134905.12	CARS2	chr13	-	111294661	111296529	111294661	111294868	111296731	111296830	7948	129,103,96,139	41,51,44,56	67,86	77,98	1760	99	5.11197e-10	6.41143e-07	0.15,0.102,0.109,0.123	0.047,0.047	0.074
7981	ENSG00000114378.12	HYAL1	chr3	-	50339487	50340411	50339487	50340054	50340896	50341004	7981	24,13,15,36	1,0,0,0	28,29	2,2	456	99	0.000269073	0.0191745	0.839,1.0,1.0,1.0	0.752,0.759	0.204
8055	ENSG00000111452.8	GPR133	chr12	+	131622188	131622774	131622681	131622774	131621517	131621559	8055	0,4,0,0	1,2,4,3	1,2	0,0	592	99	0	0	0.0,0.251,0.0,0.0	1.0,1.0	-0.937
8087	ENSG00000015475.14	BID	chr22	-	18222114	18222942	18222114	18222254	18232870	18232940	8087	3,5,14,17	3,6,7,10	10,6	1,0	787	99	0.000301607	0.0205585	0.112,0.095,0.201,0.176	0.557,1.0	-0.632
8114	ENSG00000067606.11	PRKCZ	chr1	+	2076776	2076950	2076827	2076950	2075648	2075780	8114	1,2,1,0	9,4,2,2	4,6	1,0	150	99	9.11255e-09	6.85515e-06	0.068,0.248,0.248,0.0	0.725,1.0	-0.722
8143	ENSG00000111801.11	BTN3A3	chr6	+	26443594	26443670	26443609	26443670	26440699	26440876	8143	4,0,5,4	7,6,7,18	0,2	35,32	114	99	0.000218377	0.0172654	0.332,0.0,0.383,0.162	0.0,0.051	0.194
8240	ENSG00000118058.16	KMT2A	chr11	+	118342376	118345030	118344893	118345030	118339489	118339559	8240	478,456,907,1304	4,6,1,5	492,615	0,0	2616	99	0.000155808	0.0133846	0.819,0.742,0.972,0.908	1.0,1.0	-0.14
8247	ENSG00000105655.14	ISYNA1	chr19	-	18547139	18547915	18547139	18547289	18548408	18548570	8247	195,198,177,317	0,0,1,0	326,325	4,9	725	99	4.39789e-07	0.00017237	1.0,1.0,0.96,1.0	0.918,0.831	0.115
8369	ENSG00000174791.6	RIN1	chr11	-	66101389	66101695	66101389	66101509	66101984	66102722	8369	17,19,25,19	0,0,1,0	15,14	1,5	285	99	1.11113e-05	0.00169949	1.0,1.0,0.897,1.0	0.839,0.493	0.308
8378	ENSG00000158636.12	C11orf30	chr11	+	76253211	76253411	76253259	76253411	76248838	76248994	8378	0,1,4,1	3,2,6,5	8,4	4,1	147	99	0.000663149	0.032398	0.0,0.252,0.31,0.119	0.574,0.729	-0.481
8389	ENSG00000123562.12	MORF4L2	chrX	-	102933426	102933548	102933426	102933528	102939608	102939657	8389	160,130,81,109	261,236,156,195	115,120	115,110	119	99	9.36476e-06	0.0015058	0.338,0.314,0.302,0.317	0.454,0.476	-0.147
8390	ENSG00000123562.12	MORF4L2	chrX	-	102933426	102933579	102933426	102933528	102939608	102939657	8390	445,425,236,336	261,236,156,195	323,360	115,110	150	99	1.87355e-06	0.000434574	0.529,0.543,0.5,0.532	0.65,0.684	-0.141
8393	ENSG00000123562.12	MORF4L2	chrX	-	102933426	102933579	102933426	102933528	102940098	102940188	8393	818,742,540,765	955,973,611,890	955,951	746,772	150	99	2.89407e-05	0.00362974	0.361,0.335,0.368,0.362	0.458,0.448	-0.096
8394	ENSG00000123562.12	MORF4L2	chrX	-	102933426	102933579	102933426	102933548	102940098	102940188	8394	708,657,478,676	93,127,73,104	862,855	75,53	130	99	2.58567e-08	1.35123e-05	0.853,0.798,0.833,0.832	0.897,0.925	-0.082
8496	ENSG00000119777.14	TMEM214	chr2	+	27260657	27260760	27260682	27260760	27260428	27260570	8496	3,2,1,2	6,12,0,4	3,1	1,0	124	99	0.000462475	0.0258945	0.285,0.117,1.0,0.285	0.705,1.0	-0.431
8599	ENSG00000103042.4	SLC38A7	chr16	-	58717858	58718082	58717858	58717987	58718620	58718674	8599	27,36,36,33	2,4,1,6	15,24	0,0	194	99	0.000295524	0.0204113	0.873,0.821,0.948,0.737	1.0,1.0	-0.155
8710	ENSG00000227540.1	RP11-152N13.5	chr10	+	75013558	75014107	75013650	75014107	75012548	75012853	8710	3,3,6,11	1,1,3,8	3,1	10,4	191	99	0.00118155	0.0457376	0.609,0.609,0.509,0.416	0.135,0.115	0.411
8747	ENSG00000142731.6	PLK4	chr4	+	128804416	128804512	128804420	128804512	128802985	128803081	8747	110,105,37,56	4,8,6,2	99,113	2,0	103	99	0.000522029	0.0279799	0.964,0.927,0.856,0.964	0.979,1.0	-0.062
8835	ENSG00000133265.6	HSPBP1	chr19	-	55790766	55791073	55790766	55791070	55791297	55791445	8835	4,3,6,10	33,49,35,33	0,1	40,29	102	99	6.46778e-05	0.00675991	0.105,0.056,0.143,0.227	0.0,0.032	0.117
8855	ENSG00000101489.14	CELF4	chr18	-	34855077	34855206	34855077	34855203	34901795	34901844	8855	0,2,0,1	6,4,3,4	5,4	9,14	102	99	0.00119477	0.0459655	0.0,0.327,0.0,0.195	0.35,0.217	-0.153

## Sheet: BE2C A5SS
id	geneid	genesymbol	chr	strand	longexonstart_0base	longexonend	shortes	shortee	flankinges	flankingee	v12	ijc_sample_1	sjc_sample_1	ijc_sample_2	sjc_sample_2	incformlen	skipformlen	pvalue	fdr	inclevel1	inclevel2	incleveldifference
2	ENSG00000111445.9	RFC5	chr12	+	118455494	118455858	118455494	118455620	118456876	118456941	2	21,34,11,24	3,2,1,0	19,23	11,4	337	99	0.00104633	0.0360895	0.673,0.833,0.764,1.0	0.337,0.628	0.335
33	ENSG00000198561.8	CTNND1	chr11	+	57529268	57529540	57529268	57529518	57558856	57559145	33	2,3,3,1	4,6,9,9	0,0	3,2	121	99	0.000653127	0.0272332	0.29,0.29,0.214,0.083	0.0,0.0	0.219
39	ENSG00000198561.8	CTNND1	chr11	+	57529268	57529540	57529268	57529518	57563048	57563201	39	2,4,2,1	7,2,3,1	0,0	6,5	121	99	3.16973e-05	0.0032252	0.189,0.621,0.353,0.45	0.0,0.0	0.403
45	ENSG00000131165.10	CHMP1A	chr16	-	89713442	89713739	89713610	89713739	89712934	89713122	45	9,7,8,9	218,217,208,340	11,18	185,176	267	99	0.00164674	0.0489215	0.015,0.012,0.014,0.01	0.022,0.037	-0.017
56	ENSG00000263753.2	LINC00667	chr18	+	5241697	5241888	5241697	5241811	5243592	5246507	56	12,17,45,60	2,5,4,15	15,7	0,0	176	99	3.50772e-05	0.0033201	0.771,0.657,0.864,0.692	1.0,1.0	-0.254
119	ENSG00000166747.8	AP1G1	chr16	-	71842407	71842735	71842665	71842735	71823181	71823385	119	20,18,52,102	101,85,105,136	22,12	119,127	357	99	4.22137e-07	0.000151485	0.052,0.055,0.121,0.172	0.049,0.026	0.062
133	ENSG00000119943.6	PYROXD2	chr10	-	100170369	100170715	100170695	100170715	100167660	100167754	133	1,0,0,0	1,5,3,10	6,2	1,1	425	99	2.31636e-06	0.000496189	0.189,0.0,0.0,0.0	0.583,0.318	-0.403
166	ENSG00000090316.11	MAEA	chr4	+	1305766	1306026	1305766	1305949	1316168	1316291	166	3,8,4,3	0,1,0,0	0,2	1,2	176	99	0.000104258	0.00785795	1.0,0.818,1.0,1.0	0.0,0.36	0.774
187	ENSG00000213963.2	AC074286.1	chr2	-	178187812	178188124	178188031	178188124	178186334	178186965	187	26,30,17,34	2,0,0,0	23,15	2,4	318	99	5.99719e-06	0.000904297	0.802,1.0,1.0,1.0	0.782,0.539	0.29
188	ENSG00000213963.2	AC074286.1	chr2	-	178187966	178188124	178188031	178188124	178186334	178186965	188	10,15,4,16	2,0,0,0	9,13	2,4	164	99	6.40204e-05	0.0053574	0.751,1.0,1.0,1.0	0.731,0.662	0.241
228	ENSG00000197622.8	CDC42SE1	chr1	-	151027491	151028469	151028152	151028469	151026706	151026797	228	725,665,702,953	1,5,0,1	408,449	4,6	760	99	0.000435112	0.0208342	0.99,0.945,1.0,0.992	0.93,0.907	0.063
239	ENSG00000109339.14	MAPK10	chr4	-	87115461	87115560	87115471	87115560	87080450	87080620	239	20,20,17,11	0,1,0,2	17,17	4,7	109	99	6.11212e-06	0.000904297	1.0,0.948,1.0,0.833	0.794,0.688	0.204
287	ENSG00000198755.6	RPL10A	chr6	+	35436723	35437062	35436723	35436804	35437157	35437306	287	375,342,389,511	8721,8258,9797,13105	611,685	10209,10820	357	99	1.78243e-05	0.00202088	0.012,0.011,0.011,0.011	0.016,0.017	-0.005
295	ENSG00000171960.6	PPIH	chr1	+	43124898	43125041	43124898	43124922	43125192	43125237	295	16,28,21,21	239,187,157,207	5,9	220,209	218	99	6.2212e-06	0.000904297	0.03,0.064,0.057,0.044	0.01,0.019	0.034
390	ENSG00000198740.4	ZNF652	chr17	-	47394187	47395345	47394727	47395345	47390059	47390207	390	181,215,236,311	9,13,14,33	94,108	21,17	639	99	0.000156849	0.0102964	0.757,0.719,0.723,0.594	0.41,0.496	0.245
423	ENSG00000229117.4	RPL41	chr12	+	56510558	56510714	56510558	56510583	56510972	56510995	423	474,429,484,658	7917,7808,6719,9219	716,733	7529,8422	230	99	0.000234273	0.0137667	0.025,0.023,0.03,0.03	0.039,0.036	-0.01
508	ENSG00000006015.13	C19orf60	chr19	+	18699804	18700493	18699804	18699887	18701663	18701743	508	743,668,645,794	23,20,25,10	646,738	46,32	705	99	0.000554277	0.0242571	0.819,0.824,0.784,0.918	0.664,0.764	0.122
517	ENSG00000237125.4	HAND2-AS1	chr4	+	174451608	174451783	174451608	174451690	174451950	174452229	517	26,11,37,47	230,222,207,308	19,20	345,305	192	99	0.000330929	0.0172677	0.055,0.025,0.084,0.073	0.028,0.033	0.029
518	ENSG00000237125.4	HAND2-AS1	chr4	+	174451608	174451783	174451608	174451690	174452117	174452229	518	25,15,38,50	473,461,474,716	14,16	568,531	192	99	0.000180828	0.0116821	0.027,0.017,0.04,0.035	0.013,0.015	0.016
561	ENSG00000160688.14	FLAD1	chr1	+	154962634	154963004	154962634	154962733	154965188	154965262	561	435,450,384,614	15,11,6,4	349,356	10,29	370	99	0.000215906	0.0131966	0.886,0.916,0.945,0.976	0.903,0.767	0.096
656	ENSG00000170222.11	ADPRM	chr17	+	10608226	10608932	10608226	10608844	10609754	10609871	656	15,14,21,18	23,25,43,50	30,31	27,20	187	99	0.00013674	0.00943275	0.257,0.229,0.205,0.16	0.37,0.451	-0.198
660	ENSG00000170004.12	CHD3	chr17	+	7812460	7812702	7812460	7812656	7813745	7813909	660	22,14,11,12	34,42,23,35	5,5	31,41	145	99	0.000671527	0.0273311	0.306,0.185,0.246,0.19	0.099,0.077	0.144
672	ENSG00000179915.16	NRXN1	chr2	-	50848342	50848387	50848363	50848387	50847159	50847321	672	2,11,2,0	5,9,0,2	0,0	1,3	120	99	0.00034938	0.0177747	0.248,0.502,1.0,0.0	0.0,0.0	0.438
684	ENSG00000118418.10	HMGN3	chr6	-	79911992	79912106	79912033	79912106	79910961	79911443	684	843,895,768,1070	817,797,536,715	728,787	797,912	140	99	0.000842143	0.0320329	0.422,0.443,0.503,0.514	0.392,0.379	0.085
702	ENSG00000196378.7	ZNF34	chr8	-	146005612	146005665	146005616	146005665	146003823	146003910	702	10,9,6,9	1,4,3,1	8,5	0,0	103	99	0.000408927	0.0200522	0.906,0.684,0.658,0.896	1.0,1.0	-0.214
730	ENSG00000133195.7	SLC39A11	chr17	-	70943666	70944014	70943890	70944014	70732788	70732858	730	36,35,9,17	5,6,0,3	21,26	0,0	323	99	1.78751e-05	0.00202088	0.688,0.641,1.0,0.635	1.0,1.0	-0.259
731	ENSG00000133195.7	SLC39A11	chr17	-	70943869	70944014	70943890	70944014	70732788	70732858	731	9,11,5,5	5,6,0,3	7,9	0,0	120	99	1.7092e-05	0.00202088	0.598,0.602,1.0,0.579	1.0,1.0	-0.305
736	ENSG00000164398.8	ACSL6	chr5	-	131329723	131329944	131329828	131329944	131326545	131326660	736	5,3,6,8	0,0,0,0	0,1	3,0	204	99	0.000223607	0.0133835	1.0,1.0,1.0,1.0	0.0,1.0	0.5
739	ENSG00000055147.13	FAM114A2	chr5	-	153417852	153417994	153417947	153417994	153414303	153414527	739	35,29,36,82	0,4,6,1	30,31	0,0	194	99	0.00154092	0.0465314	1.0,0.787,0.754,0.977	1.0,1.0	-0.121
756	ENSG00000111231.4	GPN3	chr12	-	110905930	110906069	110906000	110906069	110902910	110903019	756	14,11,2,5	7,6,5,9	8,9	0,2	169	99	0.000506697	0.022914	0.54,0.518,0.19,0.246	1.0,0.725	-0.489
790	ENSG00000157152.12	SYN2	chr3	+	12203045	12203276	12203045	12203108	12203511	12203654	790	2,2,1,2	43,49,25,43	0,13	39,35	267	99	0.000991519	0.0357122	0.017,0.015,0.015,0.017	0.0,0.121	-0.044
921	ENSG00000145916.14	RMND5B	chr5	+	177565108	177565397	177565108	177565259	177569633	177569729	921	14,24,17,5	6,2,2,2	7,19	1,0	237	99	0.00139036	0.0445571	0.494,0.834,0.78,0.511	0.745,1.0	-0.218
967	ENSG00000102317.13	RBM3	chrX	+	48433948	48434471	48433948	48434055	48434701	48434807	967	199,204,136,197	1344,1174,1025,1538	89,133	1941,2115	515	99	0	0	0.028,0.032,0.025,0.024	0.009,0.012	0.017
972	ENSG00000172663.4	TMEM134	chr11	-	67235487	67235563	67235498	67235563	67234971	67235034	972	4,3,0,0	11,19,15,14	4,3	3,4	110	99	0.000906796	0.0338592	0.247,0.124,0.0,0.0	0.545,0.403	-0.381
1011	ENSG00000137871.15	ZNF280D	chr15	-	57209262	57209410	57209344	57209410	57182211	57182365	1011	15,27,32,22	2,0,0,0	24,18	3,2	181	99	0.00153365	0.0465314	0.804,1.0,1.0,1.0	0.814,0.831	0.129
1034	ENSG00000163479.9	SSR2	chr1	-	155987922	155988159	155988060	155988159	155984751	155984860	1034	101,98,65,121	1603,1569,1151,1494	44,44	1257,1385	237	99	2.19812e-06	0.000496189	0.026,0.025,0.023,0.033	0.014,0.013	0.013
1223	ENSG00000204681.6	GABBR1	chr6	-	29598234	29598420	29598298	29598420	29596863	29596884	1223	2,5,1,3	0,0,0,0	0,1	3,0	163	99	0.000430686	0.0208342	1.0,1.0,1.0,1.0	0.0,1.0	0.5
1285	ENSG00000105486.9	LIG1	chr19	-	48623423	48624579	48624426	48624579	48622393	48622447	1285	33,18,31,53	57,38,14,31	22,26	65,55	1102	99	0.000154228	0.0102903	0.049,0.041,0.166,0.133	0.03,0.041	0.062
1332	ENSG00000172500.8	FIBP	chr11	-	65652979	65653134	65653000	65653134	65652548	65652657	1332	178,133,138,203	683,612,493,696	67,84	432,522	120	99	8.77305e-05	0.00706549	0.177,0.152,0.188,0.194	0.113,0.117	0.063
1349	ENSG00000145808.4	ADAMTS19	chr5	+	128861976	128862208	128861976	128862149	128863440	128863524	1349	105,101,128,166	152,149,148,250	144,137	334,322	158	99	4.56431e-05	0.00412816	0.302,0.298,0.351,0.294	0.213,0.21	0.1
1383	ENSG00000214063.6	TSPAN4	chr11	+	862549	864352	862549	862741	864436	864511	1383	22,16,10,25	54,72,36,35	5,23	136,113	1710	99	0.000237267	0.0137667	0.023,0.013,0.016,0.04	0.002,0.012	0.016
1385	ENSG00000203875.6	SNHG5	chr6	-	86387512	86387750	86387671	86387750	86387141	86387210	1385	6218,5832,6853,9093	278,205,222,320	6112,6356	412,407	258	99	3.97643e-09	5.3947e-06	0.896,0.916,0.922,0.916	0.851,0.857	0.058
1435	ENSG00000112715.16	VEGFA	chr6	+	43748468	43748540	43748468	43748522	43749692	43749824	1435	16,15,19,12	1,1,1,1	12,15	6,3	117	99	0.000479379	0.0221713	0.931,0.927,0.941,0.91	0.629,0.809	0.208
1441	ENSG00000103024.3	NME3	chr16	-	1821269	1821411	1821280	1821411	1821070	1821172	1441	23,29,38,51	166,184,269,376	15,13	196,219	110	99	0.000500326	0.0228801	0.111,0.124,0.113,0.109	0.064,0.051	0.057
1544	ENSG00000197345.8	MRPL21	chr11	-	68668002	68668073	68668015	68668073	68665394	68665480	1544	104,86,187,254	508,512,1103,1347	102,84	716,874	112	99	0.0003861	0.0194003	0.153,0.129,0.13,0.143	0.112,0.078	0.044
1598	ENSG00000129810.10	SGOL1	chr3	-	20215740	20216547	20216496	20216547	20212534	20212724	1598	225,211,113,130	16,20,4,9	227,233	4,6	855	99	0.000537089	0.0240024	0.62,0.55,0.766,0.626	0.868,0.818	-0.203
1627	ENSG00000130779.15	CLIP1	chr12	-	122825299	122826244	122825527	122826244	122819194	122819252	1627	103,96,53,106	1,5,15,20	111,100	0,0	327	99	6.03832e-08	3.51085e-05	0.969,0.853,0.517,0.616	1.0,1.0	-0.261
1716	ENSG00000143774.12	GUK1	chr1	+	228328824	228329208	228328824	228328989	228333211	228333325	1716	64,84,59,59	191,216,154,209	28,40	190,227	318	99	6.0824e-06	0.000904297	0.094,0.108,0.107,0.081	0.044,0.052	0.05
1729	ENSG00000160948.9	VPS28	chr8	-	145651257	145651446	145651304	145651446	145650328	145651155	1729	14,12,14,8	8,2,1,1	9,3	0,0	146	99	0.000150461	0.0102063	0.543,0.803,0.905,0.844	1.0,1.0	-0.226
1752	ENSG00000198015.8	MRPL42	chr12	+	93864261	93864366	93864261	93864281	93870729	93870793	1752	3,1,6,5	2,2,2,4	3,4	1,0	184	99	0.00137817	0.0445171	0.447,0.212,0.617,0.402	0.617,1.0	-0.389
1778	ENSG00000123415.10	SMUG1	chr12	-	54582294	54582380	54582298	54582380	54577439	54577743	1778	2,3,2,1	3,9,7,13	0,0	2,2	103	99	0.000803318	0.0308444	0.391,0.243,0.215,0.069	0.0,0.0	0.229
1793	ENSG00000168876.4	ANKRD49	chr11	+	94229769	94230284	94229769	94230117	94231067	94231130	1793	16,21,23,13	0,0,0,0	15,20	6,0	266	99	0.000576179	0.0249473	1.0,1.0,1.0,1.0	0.482,1.0	0.259
1959	ENSG00000130475.10	FCHO1	chr19	+	17865400	17865567	17865400	17865490	17865926	17866000	1959	0,0,0,0	14,6,1,1	2,9	6,10	176	99	4.294e-08	2.91277e-05	0.0,0.0,0.0,0.0	0.158,0.336	-0.247
2002	ENSG00000115677.12	HDLBP	chr2	-	242208368	242208710	242208615	242208710	242207891	242207956	2002	94,116,108,165	3,1,3,15	93,112	0,0	346	99	1.88307e-05	0.00207138	0.9,0.971,0.912,0.759	1.0,1.0	-0.115
2004	ENSG00000115677.12	HDLBP	chr2	-	242208372	242208710	242208615	242208710	242207891	242207956	2004	61,87,77,95	3,1,3,15	58,62	0,0	342	99	2.26302e-05	0.00242381	0.855,0.962,0.881,0.647	1.0,1.0	-0.164
2067	ENSG00000132676.11	DAP3	chr1	+	155658881	155659034	155658881	155658965	155679563	155679615	2067	385,338,420,618	513,471,460,685	255,255	532,484	168	99	4.7781e-06	0.000845515	0.307,0.297,0.35,0.347	0.22,0.237	0.097
2125	ENSG00000132950.14	ZMYM5	chr13	-	20425494	20426330	20425828	20426330	20412839	20413125	2125	64,43,85,101	0,0,0,2	60,69	4,7	433	99	8.66696e-08	4.40932e-05	1.0,1.0,1.0,0.92	0.774,0.693	0.246
2195	ENSG00000104218.9	CSPP1	chr8	+	68026039	68027499	68026039	68026097	68028148	68028357	2195	41,24,57,75	34,44,73,73	19,14	59,52	1501	99	1.31368e-06	0.000334168	0.074,0.035,0.049,0.063	0.021,0.017	0.036
2214	ENSG00000154556.13	SORBS2	chr4	-	186696380	186696520	186696384	186696520	186605907	186606000	2214	3,13,4,4	0,0,0,0	6,12	6,2	103	99	8.20236e-07	0.000222557	1.0,1.0,1.0,1.0	0.49,0.852	0.329
2238	ENSG00000139291.9	TMEM19	chr12	+	72094611	72094805	72094611	72094658	72097756	72097836	2238	223,187,179,260	5,2,17,17	172,220	4,1	246	99	0.000717995	0.0286494	0.947,0.974,0.809,0.86	0.945,0.989	-0.07
2312	ENSG00000078747.8	ITCH	chr20	+	33065576	33065711	33065576	33065665	33067499	33067594	2312	2,1,4,9	4,1,4,1	9,6	0,0	145	99	1.47061e-06	0.000352082	0.254,0.406,0.406,0.86	1.0,1.0	-0.518
2349	ENSG00000232956.4	SNHG15	chr7	-	45025480	45025696	45025619	45025696	45023955	45024025	2349	160,137,125,196	530,534,255,338	113,106	175,185	238	99	0.000788167	0.0308444	0.112,0.096,0.169,0.194	0.212,0.192	-0.059
2355	ENSG00000182400.10	TRAPPC6B	chr14	-	39628653	39628754	39628686	39628754	39620949	39621043	2355	12,9,11,20	1,9,1,6	6,7	0,0	132	99	8.85356e-05	0.00706549	0.9,0.429,0.892,0.714	1.0,1.0	-0.266
2380	ENSG00000079974.13	RABL2B	chr22	-	51221466	51221714	51221472	51221714	51220615	51220779	2380	12,9,11,10	3,4,3,6	6,1	0,0	105	99	0.000100621	0.00785795	0.79,0.68,0.776,0.611	1.0,1.0	-0.286
2432	ENSG00000164039.10	BDH2	chr4	-	104006505	104007697	104007636	104007697	104004027	104004086	2432	188,209,52,99	1,0,2,1	286,255	10,4	1230	99	0.000476387	0.0221713	0.938,1.0,0.677,0.888	0.697,0.837	0.109
2441	ENSG00000155366.12	RHOC	chr1	-	113247674	113247790	113247721	113247790	113246265	113246428	2441	6,11,13,9	198,170,103,190	14,18	104,128	146	99	0.00152961	0.0465314	0.02,0.042,0.079,0.031	0.084,0.087	-0.042
2489	ENSG00000204344.10	STK19	chr6	+	31940397	31940696	31940397	31940534	31946679	31946775	2489	8,11,10,6	67,61,55,99	3,1	67,53	261	99	0.00140998	0.0448331	0.043,0.064,0.065,0.022	0.017,0.007	0.036
2490	ENSG00000204344.10	STK19	chr6	+	31946679	31946787	31946679	31946775	31947190	31947330	2490	4,5,3,5	75,55,62,81	9,13	31,55	111	99	3.36602e-05	0.00326184	0.045,0.075,0.041,0.052	0.206,0.174	-0.137
2497	ENSG00000091127.9	PUS7	chr7	-	105111134	105111295	105111207	105111295	105108783	105108910	2497	282,282,407,504	6,10,6,19	391,400	1,4	172	99	0.00010877	0.00790522	0.964,0.942,0.975,0.939	0.996,0.983	-0.035
2514	ENSG00000234741.3	GAS5	chr1	-	173833621	173833842	173833812	173833842	173833394	173833442	2514	3961,3973,4585,5701	141,121,148,211	4383,4513	103,102	290	99	0.00108777	0.0368936	0.906,0.918,0.914,0.902	0.936,0.938	-0.027
2516	ENSG00000234741.3	GAS5	chr1	-	173834366	173834685	173834647	173834685	173833394	173833442	2516	1020,880,1048,1354	26,24,23,29	1065,1059	44,47	380	99	0.000468881	0.0221713	0.911,0.905,0.922,0.924	0.863,0.854	0.057
2517	ENSG00000234741.3	GAS5	chr1	-	173834608	173834685	173834647	173834685	173833394	173833442	2517	698,655,794,1018	26,24,23,29	733,733	44,47	138	99	0.000125471	0.00895906	0.951,0.951,0.961,0.962	0.923,0.918	0.036
2522	ENSG00000234741.3	GAS5	chr1	-	173834608	173834685	173834647	173834685	173834366	173834420	2522	2770,2600,3195,4079	1359,1320,1556,1985	2709,2793	1852,1909	138	99	0.000304455	0.0160926	0.594,0.586,0.596,0.596	0.512,0.512	0.081
2713	ENSG00000077514.4	POLD3	chr11	+	74303649	74304082	74303649	74303763	74305105	74305161	2713	8,16,2,6	102,94,32,52	3,2	123,131	418	99	0.000953403	0.034646	0.018,0.039,0.015,0.027	0.006,0.004	0.02
2824	ENSG00000116353.11	MECR	chr1	-	29547345	29547433	29547349	29547433	29543099	29543324	2824	2,3,2,2	0,4,1,6	0,0	7,4	103	99	5.04188e-06	0.000855019	1.0,0.419,0.658,0.243	0.0,0.0	0.58
2858	ENSG00000077080.5	ACTL6B	chr7	-	100253043	100253502	100253425	100253502	100247660	100247758	2858	6,11,2,2	0,0,0,0	21,25	1,4	481	99	6.44995e-05	0.0053574	1.0,1.0,1.0,1.0	0.812,0.563	0.313
2942	ENSG00000108799.8	EZH1	chr17	-	40879652	40879781	40879679	40879781	40876322	40876442	2942	36,46,22,20	2,0,0,0	30,44	4,5	126	99	4.55843e-05	0.00412816	0.934,1.0,1.0,1.0	0.855,0.874	0.119
3006	ENSG00000167549.14	CORO6	chr17	-	27944259	27945989	27945807	27945989	27943955	27944060	3006	37,32,46,62	1,0,0,2	42,33	3,4	1647	99	4.74117e-05	0.00413258	0.69,1.0,1.0,0.651	0.457,0.332	0.441
3061	ENSG00000147121.11	KRBOX4	chrX	+	46322632	46322743	46322632	46322728	46330576	46330620	3061	7,8,7,4	1,6,1,3	6,10	1,0	114	99	0.00111619	0.0372369	0.859,0.537,0.859,0.537	0.839,1.0	-0.222
3125	ENSG00000197448.9	GSTK1	chr7	+	142962084	142962389	142962084	142962185	142964709	142964826	3125	209,191,244,360	2,2,0,9	166,114	11,3	303	99	0.000657913	0.0272332	0.972,0.969,1.0,0.929	0.831,0.925	0.09
3152	ENSG00000258388.3	PPT2-EGFL8	chr6	+	32132355	32132458	32132355	32132434	32133914	32134397	3152	1,6,3,2	0,1,1,1	1,3	4,1	123	99	0.000741181	0.0292874	1.0,0.828,0.707,0.617	0.168,0.707	0.35
3183	ENSG00000196655.5	TRAPPC4	chr11	+	118889852	118890134	118889852	118889898	118890859	118890963	3183	607,571,530,769	4,3,4,1	440,408	7,7	335	99	0.00154342	0.0465314	0.978,0.983,0.975,0.996	0.949,0.945	0.036
3201	ENSG00000117155.12	SSX2IP	chr1	-	85136859	85136991	85136871	85136991	85136328	85136498	3201	120,101,38,56	2,10,3,3	95,108	1,0	111	99	0.000542561	0.0240024	0.982,0.9,0.919,0.943	0.988,1.0	-0.058
3370	ENSG00000076242.10	MLH1	chr3	+	37042445	37042544	37042445	37042539	37045891	37045965	3370	109,103,111,94	4,3,3,13	118,134	0,0	104	99	4.77227e-05	0.00413258	0.963,0.97,0.972,0.873	1.0,1.0	-0.056
3397	ENSG00000051009.6	FAM160A2	chr11	-	6239787	6239993	6239829	6239993	6238600	6239380	3397	5,7,5,10	6,8,9,20	9,13	2,6	141	99	0.00145949	0.0453446	0.369,0.381,0.281,0.26	0.76,0.603	-0.359
3468	ENSG00000118965.10	WDR35	chr2	-	20132043	20132208	20132143	20132208	20131029	20131170	3468	200,164,258,373	8,4,14,18	352,353	8,3	199	99	0.00106062	0.0362749	0.926,0.953,0.902,0.912	0.956,0.983	-0.046
3485	ENSG00000102796.6	DHRS12	chr13	-	52348056	52348170	52348065	52348170	52345956	52346047	3485	3,0,0,1	6,19,9,19	4,4	12,10	108	99	0.000697842	0.028121	0.314,0.0,0.0,0.046	0.234,0.268	-0.161
3736	ENSG00000147535.12	PPAPDC1B	chr8	-	38126340	38126508	38126399	38126508	38125888	38125979	3736	6,8,2,10	50,50,65,93	13,8	25,33	158	99	0.000337034	0.0173636	0.07,0.091,0.019,0.063	0.246,0.132	-0.128
3759	ENSG00000197530.8	MIB2	chr1	+	1560925	1562134	1560925	1561033	1562216	1562379	3759	52,52,50,86	0,2,0,0	100,127	3,2	1200	99	0.00136685	0.0445046	1.0,0.682,1.0,1.0	0.733,0.84	0.134
3784	ENSG00000165195.9	PIGA	chrX	-	15349337	15350114	15349711	15350114	15344035	15344168	3784	230,204,187,177	12,14,7,14	308,319	6,6	473	99	0.000293429	0.0159234	0.8,0.753,0.848,0.726	0.915,0.918	-0.135
3789	ENSG00000137098.9	SPAG8	chr9	-	35811753	35811998	35811920	35811998	35810879	35811054	3789	2,2,4,8	0,0,0,2	3,0	0,4	266	99	0.00145079	0.0453446	1.0,1.0,1.0,0.598	1.0,0.0	0.399
3803	ENSG00000197114.7	ZGPAT	chr20	+	62364938	62365127	62364938	62365091	62366056	62366537	3803	1,1,0,0	51,68,26,49	5,4	59,43	135	99	0.00102007	0.0359224	0.014,0.011,0.0,0.0	0.059,0.064	-0.055
3823	ENSG00000266173.1	STRADA	chr17	-	61781700	61781942	61781791	61781942	61781364	61781407	3823	54,64,54,98	9,3,1,5	21,52	0,0	190	99	0.000257856	0.0143764	0.758,0.917,0.966,0.911	1.0,1.0	-0.112
3838	ENSG00000163812.9	ZDHHC3	chr3	-	45000618	45000952	45000622	45000952	45000079	45000177	3838	1,4,0,2	4,1,1,2	3,2	0,1	103	99	0.00102383	0.0359224	0.194,0.794,0.0,0.49	1.0,0.658	-0.459
3861	ENSG00000104381.8	GDAP1	chr8	+	75263508	75263701	75263508	75263556	75272371	75272545	3861	454,515,234,285	29,40,22,19	483,401	9,14	244	99	4.01597e-06	0.000778334	0.864,0.839,0.812,0.859	0.956,0.921	-0.095
3886	ENSG00000143761.9	ARF1	chr1	+	228270360	228270551	228270360	228270466	228284778	228284963	3886	48,51,150,192	1668,1717,1402,2103	54,54	1308,1442	184	99	0.0012088	0.0399984	0.015,0.016,0.054,0.047	0.022,0.02	0.012
3887	ENSG00000143761.9	ARF1	chr1	+	228270850	228271075	228270850	228271010	228284778	228284963	3887	9,6,48,52	2,4,19,19	3,8	0,0	164	99	1.45319e-05	0.0018378	0.731,0.475,0.604,0.623	1.0,1.0	-0.392
3926	ENSG00000198265.7	HELZ	chr17	-	65124610	65124971	65124766	65124971	65120078	65120130	3926	1,2,16,7	41,45,39,53	2,0	33,55	255	99	0.000641148	0.027182	0.009,0.017,0.137,0.049	0.023,0.0	0.042
3944	ENSG00000204406.7	MBD5	chr2	+	149240678	149241704	149240678	149241005	149243310	149243519	3944	33,32,43,61	1,1,4,14	24,27	0,0	798	99	1.12755e-05	0.0014919	0.804,0.799,0.571,0.351	1.0,1.0	-0.369
4038	ENSG00000181991.11	MRPS11	chr15	+	89011138	89012376	89011138	89011255	89015857	89015956	4038	256,254,103,143	475,606,360,522	197,205	292,282	1220	99	1.18073e-07	5.33952e-05	0.042,0.033,0.023,0.022	0.052,0.056	-0.024
4070	ENSG00000150995.13	ITPR1	chr3	+	4716751	4716932	4716751	4716905	4718297	4718485	4070	36,48,6,12	82,95,34,51	10,13	78,118	126	99	2.55056e-05	0.00266174	0.256,0.284,0.122,0.156	0.092,0.08	0.119
4117	ENSG00000169981.6	ZNF35	chr3	+	44690232	44690326	44690232	44690303	44692435	44692751	4117	6,3,3,8	0,0,1,2	7,4	7,5	122	99	4.76211e-06	0.000845515	1.0,1.0,0.709,0.764	0.448,0.394	0.447
4123	ENSG00000183569.13	SERHL2	chr22	+	42967126	42967907	42967126	42967209	42968441	42968535	4123	61,54,29,55	2,1,8,1	66,57	1,0	797	99	0.000947493	0.034646	0.791,0.87,0.31,0.872	0.891,1.0	-0.235
4154	ENSG00000074755.10	ZZEF1	chr17	-	3973977	3974218	3974104	3974218	3970456	3970536	4154	56,47,52,60	0,0,0,2	34,34	2,4	226	99	0.000240156	0.0137667	1.0,1.0,1.0,0.929	0.882,0.788	0.147
4173	ENSG00000132429.5	POPDC3	chr6	-	105609299	105610035	105609670	105610035	105607585	105607694	4173	132,132,117,142	171,141,112,169	48,60	110,111	470	99	0.00010627	0.00786395	0.14,0.165,0.18,0.15	0.084,0.102	0.066
4221	ENSG00000126456.11	IRF3	chr19	-	50167699	50167930	50167809	50167930	50166599	50166771	4221	1,2,2,3	0,0,4,4	0,0	8,4	209	99	0.000889571	0.0335237	1.0,1.0,0.191,0.262	0.0,0.0	0.613
4354	ENSG00000137955.11	RABGGTB	chr1	+	76252384	76252550	76252384	76252482	76253181	76253289	4354	101,104,65,86	16,13,12,20	88,64	40,25	167	99	3.27209e-05	0.00324815	0.789,0.826,0.763,0.718	0.566,0.603	0.19
4381	ENSG00000105865.6	DUS4L	chr7	+	107214148	107214328	107214148	107214266	107215632	107215755	4381	17,10,14,22	48,53,55,93	11,4	87,65	161	99	0.00109904	0.0369676	0.179,0.104,0.135,0.127	0.072,0.036	0.082
4586	ENSG00000241837.2	ATP5O	chr21	-	35287439	35288028	35287955	35288028	35286753	35286804	4586	142,136,125,185	7,7,3,7	78,70	13,7	615	99	0.000611468	0.0261966	0.766,0.758,0.87,0.81	0.491,0.617	0.247
4698	ENSG00000167536.9	DHRS13	chr17	-	27229600	27230089	27229835	27230089	27228510	27228634	4698	27,22,14,10	0,0,0,0	29,21	5,2	334	99	3.89209e-07	0.000151485	1.0,1.0,1.0,1.0	0.632,0.757	0.305
4750	ENSG00000178982.5	EIF3K	chr19	+	39109835	39109967	39109835	39109957	39110976	39111075	4750	2249,2223,3060,3868	110,85,99,193	2164,2180	39,42	109	99	9.37882e-09	9.54295e-06	0.949,0.96,0.966,0.948	0.981,0.979	-0.024
4759	ENSG00000005436.9	GCFC2	chr2	-	75929324	75929549	75929438	75929549	75928315	75928413	4759	197,127,95,163	1,3,0,0	227,240	7,7	213	99	0.000253017	0.0143025	0.989,0.952,1.0,1.0	0.938,0.941	0.046
4760	ENSG00000104960.11	PTOV1	chr19	+	50353991	50354353	50353991	50354212	50357662	50357800	4760	6,7,8,14	1,2,3,1	4,6	0,0	240	99	0.000196383	0.0124888	0.712,0.591,0.524,0.852	1.0,1.0	-0.33
4800	ENSG00000135018.9	UBQLN1	chr9	-	86281264	86284242	86284099	86284242	86279944	86280060	4800	932,1034,877,1121	53,51,49,43	669,741	74,49	2934	99	0.00160662	0.0480803	0.372,0.406,0.377,0.468	0.234,0.338	0.12
4834	ENSG00000150756.9	FAM173B	chr5	-	10236589	10236727	10236633	10236727	10235322	10235373	4834	139,107,92,76	3,1,0,3	58,78	2,13	143	99	1.4901e-05	0.0018378	0.97,0.987,1.0,0.946	0.953,0.806	0.096
4958	ENSG00000239382.6	ALKBH6	chr19	-	36503902	36503991	36503922	36503991	36501468	36501547	4958	10,6,1,11	1,3,3,1	6,6	0,0	119	99	0.000204847	0.0128266	0.893,0.625,0.217,0.901	1.0,1.0	-0.341
4963	ENSG00000239382.6	ALKBH6	chr19	-	36504211	36504324	36504245	36504324	36503922	36503991	4963	5,4,9,11	138,126,91,138	0,1	107,90	133	99	0.000399686	0.0198381	0.026,0.023,0.069,0.056	0.0,0.008	0.04
4999	ENSG00000135476.7	ESPL1	chr12	+	53662538	53662712	53662538	53662631	53662807	53663869	4999	11,10,0,0	76,70,29,34	0,0	85,65	180	99	0.000103123	0.00785795	0.074,0.073,0.0,0.0	0.0,0.0	0.037
5043	ENSG00000258315.1	C17orf49	chr17	+	6919813	6920004	6919813	6919844	6920228	6920333	5043	235,243,224,326	16,7,7,16	201,185	0,0	259	99	3.91208e-08	2.91277e-05	0.849,0.93,0.924,0.886	1.0,1.0	-0.103
5063	ENSG00000108465.10	CDK5RAP3	chr17	+	46052879	46053019	46052879	46053004	46053234	46053379	5063	137,128,175,191	0,6,0,14	130,150	14,12	114	99	0.000300643	0.0160926	1.0,0.949,1.0,0.922	0.89,0.916	0.065
5070	ENSG00000082898.12	XPO1	chr2	-	61752626	61753656	61753554	61753656	61749745	61749818	5070	105,92,138,197	589,585,433,587	143,103	757,769	1027	99	0.00100513	0.0358851	0.017,0.015,0.03,0.031	0.018,0.013	0.008
5166	ENSG00000105176.13	URI1	chr19	+	30471065	30471271	30471065	30471157	30476129	30476208	5166	3,1,2,8	2,3,2,0	0,1	3,2	213	99	0.00092773	0.034326	0.411,0.134,0.317,1.0	0.0,0.189	0.371
5199	ENSG00000156650.8	KAT6B	chr10	+	76735156	76735539	76735156	76735212	76737073	76737195	5199	58,91,69,82	11,12,18,17	76,55	6,2	426	99	0.00143823	0.0453446	0.551,0.638,0.471,0.529	0.746,0.865	-0.258
5200	ENSG00000156650.8	KAT6B	chr10	+	76735156	76736088	76735156	76735212	76737073	76737195	5200	187,187,186,256	11,12,18,17	196,178	6,2	975	99	0.00066243	0.0272332	0.633,0.613,0.512,0.605	0.768,0.9	-0.243
5257	ENSG00000072756.12	TRNT1	chr3	+	3188113	3188307	3188113	3188247	3189133	3189387	5257	92,74,77,91	3,0,0,2	141,121	12,1	159	99	0.0010397	0.0360895	0.95,1.0,1.0,0.966	0.88,0.987	0.046
5302	ENSG00000101574.10	METTL4	chr18	-	2566819	2567653	2567510	2567653	2563795	2563858	5302	246,247,126,168	0,4,0,0	155,184	4,7	790	99	1.13634e-05	0.0014919	1.0,0.886,1.0,1.0	0.829,0.767	0.173
5395	ENSG00000244274.3	DBNDD2	chr20	+	44037440	44037676	44037440	44037578	44038571	44039250	5395	3,6,1,4	20,46,37,46	12,13	30,27	197	99	6.62015e-06	0.000929103	0.07,0.062,0.013,0.042	0.167,0.195	-0.134
5510	ENSG00000113810.11	SMC4	chr3	+	160130113	160130637	160130113	160130241	160131260	160131401	5510	26,37,44,55	297,266,193,186	40,33	523,458	495	99	6.32938e-07	0.000184004	0.017,0.027,0.044,0.056	0.015,0.014	0.021
5526	ENSG00000177200.11	CHD9	chr16	+	53341592	53341865	53341592	53341817	53342597	53342766	5526	130,158,118,165	12,20,11,24	73,83	19,24	147	99	0.00027017	0.0148593	0.879,0.842,0.878,0.822	0.721,0.7	0.145
5540	ENSG00000152556.11	PFKM	chr12	+	48528725	48529166	48528725	48528821	48531503	48531629	5540	379,375,413,576	272,193,265,352	445,428	129,166	444	99	4.46639e-07	0.000151485	0.237,0.302,0.258,0.267	0.435,0.365	-0.134
5562	ENSG00000184277.8	TM2D3	chr15	-	102191898	102192594	102192473	102192594	102190206	102190364	5562	168,139,225,299	167,168,95,136	78,94	159,203	674	99	1.92377e-11	3.91488e-08	0.129,0.108,0.258,0.244	0.067,0.064	0.119
5582	ENSG00000204305.9	AGER	chr6	-	32151052	32151165	32151100	32151165	32150890	32150978	5582	0,0,0,1	1,3,2,1	2,1	4,2	147	99	0.00166997	0.0492519	0.0,0.0,0.0,0.402	0.252,0.252	-0.151
5673	ENSG00000165410.10	CFL2	chr14	-	35182459	35182767	35182602	35182767	35182265	35182342	5673	779,625,943,1102	30,28,44,34	952,1019	22,16	242	99	0.000217242	0.0131966	0.914,0.901,0.898,0.93	0.947,0.963	-0.044
5674	ENSG00000165410.10	CFL2	chr14	-	35182459	35182767	35182713	35182767	35182265	35182342	5674	1160,961,1425,1659	24,26,17,27	1357,1475	12,9	353	99	0.00013453	0.00943275	0.931,0.912,0.959,0.945	0.969,0.979	-0.037
5675	ENSG00000165410.10	CFL2	chr14	-	35182602	35182767	35182713	35182767	35182265	35182342	5675	411,364,526,591	24,26,17,27	427,472	12,9	210	99	0.00133839	0.0439293	0.89,0.868,0.936,0.912	0.944,0.961	-0.051
5714	ENSG00000101489.14	CELF4	chr18	-	34901765	34901844	34901795	34901844	34855077	34855206	5714	7,8,2,5	0,2,0,1	3,4	5,4	129	99	3.43427e-06	0.000698875	1.0,0.754,1.0,0.793	0.315,0.434	0.512
5723	ENSG00000105483.12	CARD8	chr19	-	48735709	48737800	48737659	48737800	48734916	48735067	5723	57,56,37,54	4,2,2,2	49,55	1,0	2049	99	0.000801544	0.0308444	0.408,0.575,0.472,0.566	0.703,1.0	-0.346
5755	ENSG00000082153.13	BZW1	chr2	+	201676268	201676713	201676268	201676450	201677930	201678004	5755	2673,2918,1485,1967	91,103,34,43	1703,1886	122,83	362	99	5.47278e-07	0.00017134	0.889,0.886,0.923,0.926	0.792,0.861	0.08

## Sheet: BE2C MXE
id	geneid	genesymbol	chr	strand	stexonstart_0base	stexonend	ndexonstart_0base	ndexonend	upstreames	upstreamee	downstreames	downstreamee	v14	ijc_sample_1	sjc_sample_1	ijc_sample_2	sjc_sample_2	incformlen	skipformlen	pvalue	fdr	inclevel1	inclevel2	incleveldifference
10747	ENSG00000006740.12	ARHGAP44	chr17	+	12823071	12823148	12832245	12832363	12819216	12819328	12844372	12844441	10747	1,0,0,0	4,5,4,6	1,1	0,0	176	217	1.98441e-12	1.45944e-08	0.236,0.0,0.0,0.0	1.0,1.0	-0.941
9145	ENSG00000136717.10	BIN1	chr2	-	127809830	127809938	127811480	127811588	127808729	127808819	127815048	127815177	9145	0,1,3,0	3,4,3,6	1,3	0,0	207	207	4.6975e-10	1.38191e-06	0.0,0.2,0.5,0.0	1.0,1.0	-0.825
1670	ENSG00000068745.10	IP6K2	chr3	-	48745552	48745670	48748799	48748892	48732522	48732851	48754589	48754647	1670	2,1,0,0	0,7,2,1	2,4	0,0	192	217	1.78229e-07	0.000187256	1.0,0.139,0.0,0.0	1.0,1.0	-0.715
4373	ENSG00000182986.8	ZNF320	chr19	-	53397378	53397473	53398591	53398688	53397031	53397109	53400772	53400813	4373	0,0,5,5	2,5,4,4	6,1	1,0	196	194	3.78222e-05	0.00751794	0.0,0.0,0.553,0.553	0.856,1.0	-0.651
13968	ENSG00000076554.11	TPD52	chr8	-	80956401	80956443	80962679	80962706	80954854	80954903	80963761	80963863	13968	0,2,0,0	8,10,8,2	1,4	2,0	126	141	3.68605e-06	0.00154767	0.0,0.183,0.0,0.0	0.359,1.0	-0.634
9944	ENSG00000182718.12	ANXA2	chr15	-	60686772	60686894	60688571	60688626	60678226	60678285	60690141	60690185	9944	0,6,0,1	5,1,7,1	1,1	0,0	154	221	5.85027e-07	0.000344207	0.0,0.896,0.0,0.589	1.0,1.0	-0.629
6792	ENSG00000145687.11	SSBP2	chr5	-	80932375	80932437	80946085	80946158	80809446	80809536	81047486	81047616	6792	2,0,0,5	0,1,4,4	1,2	0,0	172	161	1.4605e-05	0.0039627	1.0,0.0,0.0,0.539	1.0,1.0	-0.615
13848	ENSG00000141380.9	SS18	chr18	-	23660268	23660387	23664015	23664139	23658039	23658124	23667464	23667541	13848	0,1,5,3	2,0,8,10	2,3	0,0	223	218	4.15757e-07	0.000291208	0.0,1.0,0.379,0.227	1.0,1.0	-0.599
3169	ENSG00000011347.5	SYT7	chr11	-	61309682	61310051	61313502	61313727	61300460	61300596	61314648	61314780	3169	0,2,0,2	5,1,4,0	1,5	0,0	324	468	2.34163e-05	0.00532576	0.0,0.743,0.0,1.0	1.0,1.0	-0.564
12345	ENSG00000204790.8	CBWD6	chr9	-	69234033	69234250	69234829	69234952	69229611	69229668	69235561	69235606	12345	2,2,0,7	2,4,2,1	2,5	0,0	222	316	6.60998e-05	0.0107816	0.587,0.416,0.0,0.909	1.0,1.0	-0.522
8313	ENSG00000156398.8	SFXN2	chr10	+	104489479	104489565	104492615	104492665	104488187	104488286	104493310	104493360	8313	2,0,0,2	7,2,7,10	3,6	2,3	185	149	6.4866e-06	0.00221887	0.187,0.0,0.0,0.139	0.547,0.617	-0.501
11985	ENSG00000149532.11	CPSF7	chr11	-	61188525	61188602	61188663	61188729	61187941	61188045	61188861	61189080	11985	1,1,8,6	1,3,5,14	4,5	0,1	165	176	3.38938e-05	0.00682936	0.516,0.262,0.631,0.314	1.0,0.842	-0.49
14109	ENSG00000205649.3	HTN3	chr4	+	70897695	70897716	70897794	70897824	70896444	70896508	70898883	70898970	14109	12,7,1,2	13,21,1,5	3,1	1,0	120	129	0.000434341	0.0412176	0.498,0.264,0.518,0.301	0.763,1.0	-0.486
6014	ENSG00000137522.13	RNF121	chr11	+	71673197	71673335	71689131	71689281	71671795	71671937	71693806	71693961	6014	5,3,2,1	0,2,4,7	3,4	0,0	237	249	1.001e-05	0.00323785	1.0,0.612,0.344,0.131	1.0,1.0	-0.478
7264	ENSG00000128346.6	C22orf23	chr22	-	38343287	38343470	38347466	38347529	38341048	38341180	38349053	38349165	7264	0,1,2,0	7,12,7,5	6,3	3,11	162	282	5.0199e-05	0.00922972	0.0,0.127,0.332,0.0	0.777,0.322	-0.435
14530	ENSG00000100505.9	TRIM9	chr14	-	51449659	51449683	51452673	51452862	51448517	51448821	51464767	51464906	14530	6,3,8,11	9,5,0,0	5,4	0,0	288	123	0.000335133	0.0358691	0.222,0.204,1.0,1.0	1.0,1.0	-0.393
10405	ENSG00000231312.2	AC007246.3	chr2	+	39785122	39785187	39811744	39811950	39743554	39743682	39826505	39826679	10405	1,1,2,2	4,0,2,2	6,1	0,0	164	305	0.000249542	0.0293641	0.317,1.0,0.65,0.65	1.0,1.0	-0.346
2656	ENSG00000134343.8	ANO3	chr11	+	26538373	26538474	26547181	26547226	26529650	26529809	26552751	26552883	2656	18,41,18,7	9,24,4,2	2,1	0,0	200	144	0.000132268	0.0181825	0.59,0.552,0.764,0.716	1.0,1.0	-0.345
15054	ENSG00000259471.1	RP11-321F6.1	chr15	+	66960678	66960792	66976336	66976380	66874527	66874586	66977607	66978132	15054	11,6,32,29	10,8,19,22	15,27	3,5	213	143	0.000305294	0.0345428	0.425,0.335,0.531,0.469	0.77,0.784	-0.337
1538	ENSG00000140577.11	CRTC3	chr15	+	91150609	91150710	91157684	91157720	91147616	91147679	91161114	91161200	1538	7,26,21,28	7,7,10,7	12,10	0,1	200	135	5.97425e-05	0.00998583	0.403,0.715,0.586,0.73	1.0,0.871	-0.327
7706	ENSG00000102878.11	HSF4	chr16	+	67201205	67201305	67201363	67201502	67201022	67201125	67201726	67201850	7706	1,0,0,0	3,5,4,4	3,1	5,2	199	238	2.37464e-05	0.00532576	0.285,0.0,0.0,0.0	0.418,0.374	-0.325
5728	ENSG00000140470.9	ADAMTS17	chr15	-	100594101	100594259	100603883	100603964	100591772	100591936	100636560	100636681	5728	1,1,2,7	11,6,18,52	12,3	17,8	180	257	0.000572715	0.0492635	0.115,0.192,0.137,0.161	0.502,0.349	-0.274
10084	ENSG00000138658.11	C4orf21	chr4	-	113549776	113550007	113550914	113551171	113544972	113545032	113553085	113553166	10084	5,15,4,7	3,5,2,0	6,1	0,0	356	330	0.00024183	0.0286861	0.607,0.736,0.65,1.0	1.0,1.0	-0.252
7988	ENSG00000005471.11	ABCB4	chr7	-	87042932	87043033	87047852	87047936	87038551	87038708	87049313	87049391	7988	4,6,18,19	1,1,6,14	3,5	0,0	183	200	7.32667e-05	0.011588	0.814,0.868,0.766,0.597	1.0,1.0	-0.239
14566	ENSG00000119004.10	CYP20A1	chr2	+	204110568	204110618	204111477	204111644	204103662	204103857	204116689	204116832	14566	25,28,37,60	53,59,90,137	39,24	34,20	149	266	1.53468e-05	0.00403099	0.457,0.459,0.423,0.439	0.672,0.682	-0.233
1971	ENSG00000035681.3	NSMAF	chr8	-	59549792	59549948	59552526	59552661	59548026	59548105	59555542	59555632	1971	0,0,0,1	9,14,13,10	1,6	8,11	234	255	1.20723e-05	0.0036239	0.0,0.0,0.0,0.098	0.12,0.373	-0.222
9029	ENSG00000100814.13	CCNB1IP1	chr14	-	20785953	20786133	20786414	20786629	20784385	20784719	20793697	20793812	9029	16,19,19,27	52,49,67,74	23,29	25,32	314	279	4.12697e-05	0.00798731	0.215,0.256,0.201,0.245	0.45,0.446	-0.219
13158	ENSG00000204764.8	RANBP17	chr5	+	170455875	170455993	170585337	170585498	170395245	170395381	170588410	170588470	13158	11,18,5,5	7,5,0,2	12,9	0,0	217	260	6.764e-05	0.0108143	0.653,0.812,1.0,0.75	1.0,1.0	-0.196
9028	ENSG00000100814.13	CCNB1IP1	chr14	-	20785952	20786133	20786414	20786629	20784385	20784719	20793697	20793812	9028	16,19,19,27	83,75,107,127	23,29	39,47	314	280	4.12244e-06	0.00159571	0.147,0.184,0.137,0.159	0.345,0.355	-0.193
14949	ENSG00000087470.13	DNM1L	chr12	+	32858758	32858797	32859623	32859748	32854348	32854496	32860300	32860347	14949	9,11,6,6	12,3,2,7	2,9	1,0	138	224	0.000415854	0.0402421	0.549,0.856,0.83,0.582	0.765,1.0	-0.178
8788	ENSG00000100095.14	SEZ6L	chr22	+	26761337	26761532	26769416	26769449	26747017	26747209	26771543	26771655	8788	21,15,14,41	1,2,1,6	25,50	0,0	294	132	9.63793e-05	0.0146149	0.904,0.771,0.863,0.754	1.0,1.0	-0.177
11443	ENSG00000148288.7	GBGT1	chr9	-	136031287	136031323	136031401	136031489	136030564	136030699	136036853	136036919	11443	1,4,0,2	28,22,8,20	5,13	26,19	187	135	0.000389977	0.0389352	0.025,0.116,0.0,0.067	0.122,0.331	-0.174
3193	ENSG00000149091.11	DGKZ	chr11	+	46389554	46389629	46391043	46391100	46389201	46389297	46391490	46391559	3193	3,5,5,8	37,38,52,38	12,13	31,32	174	156	0.000458892	0.0428793	0.068,0.106,0.079,0.159	0.258,0.267	-0.16
8882	ENSG00000153310.14	FAM49B	chr8	-	130892621	130892704	130908917	130909100	130891634	130891717	130915557	130915596	8882	5,6,4,9	54,42,35,49	12,12	18,37	282	182	0.000565879	0.0489983	0.056,0.084,0.069,0.106	0.301,0.173	-0.158
8011	ENSG00000124831.14	LRRFIP1	chr2	+	238636518	238636578	238647874	238647952	238629414	238629465	238657006	238657042	8011	7,15,4,18	0,5,1,5	6,9	0,0	159	177	0.000503896	0.0454712	1.0,0.77,0.817,0.8	1.0,1.0	-0.153
2197	ENSG00000181555.15	SETD2	chr3	-	47087976	47088111	47098310	47098980	47084050	47084190	47103652	47103836	2197	245,246,328,475	65,67,60,90	293,327	40,34	769	234	0.000215439	0.0261892	0.534,0.528,0.625,0.616	0.69,0.745	-0.142
1523	ENSG00000079805.12	DNM2	chr19	+	10906736	10906875	10908055	10908194	10906047	10906115	10909161	10909248	1523	290,300,136,200	441,415,531,621	316,360	399,420	238	238	0.000533081	0.0472355	0.397,0.42,0.204,0.244	0.442,0.462	-0.136
13718	ENSG00000079387.9	SENP1	chr12	-	48482583	48482743	48495251	48495299	48468472	48468576	48499810	48500091	13718	2,0,2,0	44,51,31,25	8,4	54,40	147	259	5.53301e-05	0.00964321	0.074,0.0,0.102,0.0	0.207,0.15	-0.135
1376	ENSG00000103546.14	SLC6A2	chr16	+	55719054	55719193	55725829	55725964	55690351	55690880	55727921	55728025	1376	522,546,88,125	1321,1398,330,472	245,266	408,442	238	234	3.58231e-07	0.000263461	0.28,0.277,0.208,0.207	0.371,0.372	-0.129
13289	ENSG00000126214.16	KLC1	chr14	+	104151322	104151373	104153417	104153548	104145720	104145855	104166991	104167064	13289	28,27,19,45	158,178,146,188	45,41	135,124	150	230	0.000565764	0.0489983	0.214,0.189,0.166,0.268	0.338,0.336	-0.128
8072	ENSG00000163138.14	PACRGL	chr4	+	20715054	20715162	20726430	20726511	20706282	20706437	20728907	20729020	8072	203,198,169,178	23,32,53,84	194,224	24,20	207	180	0.000467717	0.0429978	0.885,0.843,0.735,0.648	0.875,0.907	-0.113
12852	ENSG00000143748.13	NVL	chr1	-	224481968	224482113	224484202	224484320	224477185	224477435	224488263	224488365	12852	208,196,129,149	230,236,148,197	236,203	161,173	217	244	0.000317348	0.0348348	0.504,0.483,0.495,0.46	0.622,0.569	-0.11
13290	ENSG00000126214.16	KLC1	chr14	+	104151322	104151373	104158695	104158762	104145720	104145855	104166991	104167064	13290	28,27,19,45	4,7,3,5	45,41	2,0	150	166	0.000297044	0.0341345	0.886,0.81,0.875,0.909	0.961,1.0	-0.11
9943	ENSG00000182718.12	ANXA2	chr15	-	60686772	60686894	60688349	60688626	60678226	60678285	60690141	60690185	9943	72,60,40,60	5,1,7,1	50,70	0,0	376	221	0.000386924	0.0389352	0.894,0.972,0.771,0.972	1.0,1.0	-0.098
13816	ENSG00000161533.7	ACOX1	chr17	-	73956295	73956456	73969705	73969866	73953539	73953647	73974614	73974774	13816	59,70,50,77	294,298,248,309	71,70	173,204	260	260	0.000466076	0.0429978	0.167,0.19,0.168,0.199	0.291,0.255	-0.092
1407	ENSG00000080823.17	MOK	chr14	-	102698043	102698158	102698871	102699045	102695793	102695994	102700024	102700126	1407	514,488,399,520	224,173,176,232	503,585	149,146	273	214	0.000195569	0.0241734	0.643,0.689,0.64,0.637	0.726,0.759	-0.09
4205	ENSG00000154114.8	TBCEL	chr11	+	120924338	120924441	120925760	120926017	120918236	120918376	120929053	120929180	4205	14,15,13,23	173,168,268,388	30,25	225,175	202	356	0.000430316	0.0411318	0.125,0.136,0.079,0.095	0.19,0.201	-0.087
2899	ENSG00000111215.7	PRR4	chr12	-	11036752	11036874	11126253	11126320	11035150	11035297	11199618	11199789	2899	55,44,20,17	12,5,3,2	17,31	1,0	166	221	0.000378005	0.0383453	0.859,0.921,0.899,0.919	0.958,1.0	-0.079
14894	ENSG00000075711.16	DLG1	chr3	-	196876613	196876667	196888510	196888609	196869588	196869639	196921295	196921460	14894	34,30,28,29	229,255,213,264	55,41	187,198	198	153	7.7256e-05	0.0120889	0.103,0.083,0.092,0.078	0.185,0.138	-0.072
15444	ENSG00000184182.14	UBE2F	chr2	+	238933982	238934053	238939196	238939254	238881733	238881867	238940862	238940895	15444	7,7,5,7	144,131,122,164	15,10	97,94	170	157	0.00058727	0.0499315	0.043,0.047,0.036,0.038	0.125,0.089	-0.066
6618	ENSG00000135486.13	HNRNPA1	chr12	+	54676862	54677018	54678041	54678101	54676583	54676658	54680445	54680516	6618	1432,1555,1163,1699	163,173,134,163	2383,2423	134,142	255	159	2.15647e-08	3.96494e-05	0.846,0.849,0.844,0.867	0.917,0.914	-0.064
13721	ENSG00000079387.9	SENP1	chr12	-	48491776	48491907	48495251	48495299	48490125	48490210	48499810	48499829	13721	4,0,2,0	129,167,78,128	9,5	123,148	147	230	0.000166432	0.0216641	0.046,0.0,0.039,0.0	0.103,0.05	-0.055
5407	ENSG00000128989.6	ARPP19	chr15	-	52856386	52856443	52861044	52861097	52849296	52849419	52861312	52861364	5407	333,415,242,440	37,40,38,42	263,269	14,13	152	156	0.000210724	0.0258295	0.902,0.914,0.867,0.915	0.951,0.955	-0.053
1142	ENSG00000174442.7	ZWILCH	chr15	+	66801083	66801230	66806325	66806421	66797637	66797729	66807863	66807982	1142	16,26,19,30	285,294,254,366	46,68	402,372	246	195	6.67023e-05	0.0107816	0.043,0.066,0.056,0.061	0.083,0.127	-0.049
6459	ENSG00000029364.7	SLC39A9	chr14	+	69890810	69890919	69908548	69908689	69864731	69865167	69908785	69908983	6459	145,164,208,326	24,8,28,48	258,332	12,23	208	240	0.000323579	0.0349965	0.875,0.959,0.896,0.887	0.961,0.943	-0.048
4500	ENSG00000143774.12	GUK1	chr1	+	228328824	228328989	228333211	228333325	228327990	228328064	228333726	228333768	4500	409,362,252,379	1922,2077,1889,2828	434,438	1673,1955	264	213	4.69652e-05	0.00885656	0.147,0.123,0.097,0.098	0.173,0.153	-0.047
8079	ENSG00000140859.11	KIFC3	chr16	-	57824841	57824978	57828910	57829053	57806134	57806200	57831983	57832194	8079	116,141,75,128	7,12,2,11	130,154	1,3	242	236	0.00013175	0.0181825	0.942,0.92,0.973,0.919	0.992,0.98	-0.047
1582	ENSG00000160688.14	FLAD1	chr1	+	154962634	154962733	154962814	154963004	154955834	154955873	154965188	154965262	1582	15,11,7,4	415,425,360,576	10,29	329,341	198	289	3.94082e-05	0.00772874	0.05,0.036,0.028,0.01	0.042,0.11	-0.045
9411	ENSG00000076685.14	NT5C2	chr10	-	104871501	104871562	104899162	104899236	104866345	104866463	104934614	104934739	9411	120,85,275,293	2,2,10,16	132,163	0,0	173	160	0.000186819	0.0236591	0.982,0.975,0.962,0.944	1.0,1.0	-0.034
4581	ENSG00000122034.8	GTF3A	chr13	+	28008275	28008356	28008941	28009171	28004669	28004758	28009269	28009329	4581	58,36,54,48	1625,1503,3352,4265	94,99	2470,2313	180	329	2.70258e-08	4.11878e-05	0.061,0.042,0.029,0.02	0.065,0.073	-0.031
6752	ENSG00000091127.9	PUS7	chr7	-	105111207	105111295	105112578	105112640	105108783	105108910	105121498	105121624	6752	173,154,237,325	7,10,8,17	182,235	1,4	161	187	0.000376477	0.0383453	0.966,0.947,0.972,0.957	0.995,0.986	-0.03
6059	ENSG00000139218.13	SCAF11	chr12	-	46357889	46357971	46367972	46369517	46355482	46355640	46384135	46384348	6059	136,126,199,228	310,284,370,408	247,247	315,309	1644	181	5.59621e-05	0.00964321	0.046,0.047,0.056,0.058	0.079,0.081	-0.028
6489	ENSG00000084207.11	GSTP1	chr11	+	67351604	67351640	67351934	67352041	67351065	67351315	67352155	67352243	6489	55,54,19,47	2353,2571,1708,2222	104,90	2457,2555	135	206	4.90166e-07	0.000313472	0.034,0.031,0.017,0.031	0.061,0.051	-0.028
10251	ENSG00000119689.10	DLST	chr14	+	75355979	75356052	75356599	75356655	75355797	75355850	75357758	75357870	10251	7,6,2,10	365,384,264,291	20,10	284,305	172	155	0.000406112	0.0398624	0.017,0.014,0.007,0.03	0.06,0.029	-0.027
13937	ENSG00000157823.12	AP3S2	chr15	-	90420537	90420656	90431752	90431864	90414706	90414778	90432280	90432372	13937	593,601,604,707	28,24,16,32	369,384	2,9	211	218	0.00025928	0.0302678	0.956,0.963,0.975,0.958	0.995,0.978	-0.023
6490	ENSG00000084207.11	GSTP1	chr11	+	67351604	67351640	67352155	67352243	67351065	67351315	67352608	67352712	6490	55,53,19,44	2620,2796,1694,2623	107,90	2954,3021	135	187	2.44223e-06	0.0011588	0.028,0.026,0.015,0.023	0.048,0.04	-0.021
3595	ENSG00000127314.13	RAP1B	chr12	+	69018454	69018653	69042478	69042561	69004704	69004823	69044179	69044248	3595	21,16,15,23	636,590,685,884	22,21	336,398	298	182	0.000493508	0.0448087	0.02,0.016,0.013,0.016	0.038,0.031	-0.018
4615	ENSG00000015479.13	MATR3	chr5	+	138629141	138629264	138642927	138644016	138614739	138614818	138650363	138650425	4615	33,28,12,28	11226,10470,10340,13629	56,91	14242,15196	222	1188	1.08266e-07	0.000122499	0.015,0.014,0.006,0.011	0.021,0.031	-0.015
1357	ENSG00000169045.13	HNRNPH1	chr5	-	179048843	179048977	179050037	179050188	179048242	179048398	179050636	179050671	1357	2844,2594,1963,2550	58,64,45,62	3258,3484	45,36	250	233	2.36526e-05	0.00532576	0.979,0.974,0.976,0.975	0.985,0.989	-0.011
1356	ENSG00000169045.13	HNRNPH1	chr5	-	179048843	179048977	179050037	179050165	179048242	179048398	179050636	179050671	1356	3409,3052,2274,3064	58,64,45,62	3792,4069	45,36	227	233	4.64384e-05	0.00885656	0.984,0.98,0.981,0.981	0.989,0.991	-0.009
6619	ENSG00000135486.13	HNRNPA1	chr12	+	54677595	54677751	54678041	54678101	54676583	54676658	54680445	54680516	6619	10429,9194,9907,13014	163,173,134,163	15238,16130	134,142	255	159	2.88337e-06	0.00130037	0.976,0.971,0.979,0.98	0.986,0.986	-0.009
8839	ENSG00000104529.13	EEF1D	chr8	-	144663455	144663498	144668388	144668460	144663223	144663324	144668898	144669022	8839	1121,1124,1025,1385	24,21,19,30	1652,1570	49,74	171	142	6.24899e-05	0.0103277	0.975,0.978,0.978,0.975	0.966,0.946	0.021
2995	ENSG00000147687.12	TATDN1	chr8	-	125506073	125506200	125507712	125507783	125500748	125500937	125516080	125516192	2995	6,7,30,35	380,321,592,693	7,8	539,460	170	226	0.000371642	0.0382271	0.021,0.028,0.063,0.063	0.017,0.023	0.024
5652	ENSG00000116679.11	IVNS1ABP	chr1	-	185274667	185274775	185275616	185275757	185270565	185270695	185276145	185276271	5652	33,39,21,35	727,745,295,472	35,32	1119,1168	240	207	0.000126665	0.0179146	0.038,0.043,0.058,0.06	0.026,0.023	0.025
9562	ENSG00000003989.12	SLC7A2	chr8	+	17412068	17412208	17412454	17412591	17409272	17409495	17415803	17415906	9562	777,661,461,624	8,5,3,5	490,589	22,15	239	236	6.86819e-07	0.000388555	0.99,0.992,0.993,0.992	0.957,0.975	0.026
9207	ENSG00000188243.8	COMMD6	chr13	-	76104249	76104402	76104446	76104544	76100571	76100775	76111799	76111811	9207	109,130,206,250	2200,2329,3661,5050	83,84	2801,3032	197	252	5.31238e-07	0.000325582	0.06,0.067,0.067,0.06	0.037,0.034	0.028
15119	ENSG00000101084.12	C20orf24	chr20	+	35236292	35236403	35238003	35238133	35236117	35236221	35240412	35240960	15119	85,92,59,97	1344,1251,1027,1476	40,32	1068,1086	210	229	1.07468e-05	0.00335811	0.065,0.074,0.059,0.067	0.039,0.031	0.031
5059	ENSG00000140416.15	TPM1	chr15	+	63353396	63353472	63353911	63353987	63353067	63353138	63354413	63354476	5059	2129,2269,1812,2594	187,246,38,47	1195,1332	127,112	175	175	4.23331e-06	0.00159661	0.919,0.902,0.979,0.982	0.904,0.922	0.032
9206	ENSG00000188243.8	COMMD6	chr13	-	76104249	76104402	76104446	76104541	76100571	76100775	76111799	76111811	9206	122,137,275,322	2200,2329,3661,5050	101,104	2801,3032	194	252	3.40147e-07	0.000263461	0.067,0.071,0.089,0.076	0.045,0.043	0.032
15409	ENSG00000183570.12	PCBP3	chr21	+	47278594	47278724	47316121	47316276	47269874	47270009	47319512	47319536	15409	5,5,10,21	266,257,148,240	3,7	390,353	229	254	0.00026227	0.0303758	0.02,0.021,0.07,0.088	0.008,0.022	0.035
4354	ENSG00000104852.10	SNRNP70	chr19	+	49605370	49605430	49607890	49607992	49604646	49604728	49610881	49610969	4354	62,46,57,63	1113,1175,883,1202	31,36	1507,1581	159	201	3.25446e-08	4.35181e-05	0.066,0.047,0.075,0.062	0.025,0.028	0.036
8200	ENSG00000050748.13	MAPK9	chr5	-	179674438	179674510	179674854	179674926	179669572	179669755	179675972	179676138	8200	22,15,15,30	374,279,231,280	10,8	294,336	171	171	0.000358233	0.0376836	0.056,0.051,0.061,0.097	0.033,0.023	0.038
14482	ENSG00000106605.6	BLVRA	chr7	+	43810736	43810769	43827502	43827624	43798278	43798333	43830847	43830967	14482	3,17,1,7	234,187,172,236	2,1	259,284	132	221	0.000144369	0.0194819	0.021,0.132,0.01,0.047	0.013,0.006	0.043
5035	ENSG00000153044.5	CENPH	chr5	+	68492879	68492936	68498332	68498396	68491543	68491618	68504022	68504186	5035	189,183,141,186	3,5,3,2	297,232	14,21	156	163	8.42479e-06	0.00281637	0.985,0.975,0.98,0.99	0.957,0.92	0.044
4148	ENSG00000162910.14	MRPL55	chr1	-	228295935	228296019	228296655	228296722	228295368	228295570	228296961	228297000	4148	12,9,14,15	194,183,167,244	2,6	255,247	166	183	2.88213e-05	0.00588795	0.064,0.051,0.085,0.063	0.009,0.026	0.048
9205	ENSG00000188243.8	COMMD6	chr13	-	76104249	76104395	76104446	76104544	76100571	76100775	76111799	76111811	9205	109,130,206,250	1164,1167,1983,2625	83,84	1501,1594	197	245	3.44505e-07	0.000263461	0.104,0.122,0.114,0.106	0.064,0.062	0.048
1681	ENSG00000111653.15	ING4	chr12	-	6762395	6762562	6764803	6765079	6762101	6762216	6765892	6765964	1681	21,37,3,1	164,176,148,224	2,1	131,129	375	266	3.33836e-06	0.00144424	0.083,0.13,0.014,0.003	0.011,0.005	0.05
2789	ENSG00000152942.14	RAD17	chr5	+	68666861	68666998	68667280	68667384	68665632	68666111	68669656	68669914	2789	65,72,77,102	0,0,1,2	84,100	1,10	236	203	0.000304778	0.0345428	1.0,1.0,0.985,0.978	0.986,0.896	0.05
14528	ENSG00000123562.12	MORF4L2	chrX	-	102933426	102933579	102939608	102939657	102931422	102931979	102940098	102940188	14528	627,598,298,446	3434,3417,2271,3003	333,372	3121,3154	148	252	0.000391761	0.0389352	0.237,0.23,0.183,0.202	0.154,0.167	0.052
394	ENSG00000135336.10	ORC3	chr6	+	88304244	88304331	88311501	88311599	88304070	88304125	88313101	88313246	394	19,29,32,25	295,275,285,378	13,12	422,434	186	197	1.68124e-06	0.000852736	0.064,0.1,0.106,0.065	0.032,0.028	0.054
1033	ENSG00000170873.14	MTSS1	chr8	-	125569921	125570116	125570953	125571073	125568472	125568646	125575022	125575233	1033	2,1,11,15	105,94,180,181	0,0	120,124	219	294	1.48058e-05	0.0039627	0.025,0.014,0.076,0.1	0.0,0.0	0.054
9204	ENSG00000188243.8	COMMD6	chr13	-	76104249	76104395	76104446	76104541	76100571	76100775	76111799	76111811	9204	122,137,275,322	1164,1167,1983,2625	101,104	1501,1594	194	245	2.19055e-07	0.000214805	0.117,0.129,0.149,0.134	0.078,0.076	0.055
15120	ENSG00000101084.12	C20orf24	chr20	+	35236292	35236403	35238003	35238161	35236117	35236221	35240412	35240960	15120	85,92,59,97	794,715,554,830	40,32	610,603	210	257	1.60086e-05	0.00412276	0.116,0.136,0.115,0.125	0.074,0.061	0.055
9694	ENSG00000004866.14	ST7	chr7	+	116739815	116739898	116759614	116759774	116660237	116660683	116769846	116769901	9694	48,65,25,60	327,377,259,353	22,24	288,299	182	259	0.000410721	0.0400086	0.173,0.197,0.121,0.195	0.098,0.103	0.071
7994	ENSG00000106723.12	SPIN1	chr9	+	91063855	91063904	91077410	91077664	91003344	91003453	91083286	91083520	7994	27,30,12,29	307,337,260,381	10,14	383,340	148	353	0.000315741	0.0348348	0.173,0.175,0.099,0.154	0.059,0.089	0.076
9355	ENSG00000258466.1	RP11-1012A1.4	chr14	-	68129193	68129252	68151731	68151921	68126536	68126639	68156928	68157084	9355	1362,1394,1093,1601	219,232,47,72	937,1032	180,140	289	158	0.000233402	0.0279115	0.773,0.767,0.927,0.924	0.74,0.801	0.077
4229	ENSG00000131374.10	TBC1D5	chr3	-	17549965	17550097	17664139	17664257	17469941	17470011	17665340	17665405	4229	10,6,18,28	91,89,118,170	0,11	98,148	217	231	0.000369067	0.0382271	0.105,0.067,0.14,0.149	0.0,0.073	0.079
771	ENSG00000198755.6	RPL10A	chr6	+	35436575	35436650	35436723	35437062	35436196	35436216	35437157	35437306	771	448,350,448,639	307,267,308,411	520,533	525,600	174	438	2.51907e-05	0.00544897	0.786,0.767,0.785,0.796	0.714,0.691	0.081
14924	ENSG00000118454.8	ANKRD13C	chr1	-	70781163	70781249	70790535	70790640	70771906	70771973	70801740	70801782	14924	77,77,33,45	0,2,0,2	45,52	4,6	204	185	0.000114424	0.0165007	1.0,0.972,1.0,0.953	0.911,0.887	0.082
12889	ENSG00000129197.10	RPAIN	chr17	+	5329290	5329619	5331390	5331531	5326088	5326149	5335861	5336196	12889	291,299,291,365	265,244,235,359	233,194	266,300	428	240	0.000361234	0.0376836	0.381,0.407,0.41,0.363	0.329,0.266	0.093
1372	ENSG00000103546.14	SLC6A2	chr16	+	55703476	55703608	55719054	55719193	55690555	55690880	55727921	55728025	1372	1340,1452,344,402	522,546,88,125	494,475	245,266	231	238	8.69765e-05	0.0133264	0.726,0.733,0.801,0.768	0.675,0.648	0.096
2984	ENSG00000153113.19	CAST	chr5	+	96062497	96062563	96066483	96066564	96058342	96058402	96071875	96071891	2984	21,20,53,41	142,171,179,240	12,11	190,159	165	180	1.65055e-05	0.00412276	0.139,0.113,0.244,0.157	0.064,0.07	0.096
3590	ENSG00000085733.11	CTTN	chr11	+	70266505	70266616	70267575	70267686	70265851	70265962	70269045	70269101	3590	996,1027,658,795	327,353,317,366	672,707	433,427	210	210	1.47642e-05	0.0039627	0.753,0.744,0.675,0.685	0.608,0.623	0.099
1519	ENSG00000128973.7	CLN6	chr15	-	68506627	68506726	68510873	68510988	68503600	68503656	68521839	68522047	1519	183,159,112,150	16,21,4,5	185,263	38,47	214	198	4.35596e-06	0.0016018	0.914,0.875,0.963,0.965	0.818,0.838	0.101
3886	ENSG00000113597.13	TRAPPC13	chr5	+	64954194	64954328	64956525	64956724	64948327	64948372	64957876	64957977	3886	174,176,397,431	302,306,503,696	133,157	334,362	233	298	0.000228149	0.0275069	0.424,0.424,0.502,0.442	0.337,0.357	0.101
11977	ENSG00000178904.14	DPY19L3	chr19	+	32958379	32958532	32959636	32959719	32955633	32955690	32968427	32968560	11977	16,18,14,22	116,114,46,50	9,16	189,160	252	182	1.6537e-05	0.00412276	0.091,0.102,0.18,0.241	0.033,0.067	0.103
11386	ENSG00000073921.13	PICALM	chr11	-	85707868	85707972	85718584	85718626	85701292	85701442	85722072	85722179	11386	202,233,287,376	136,96,125,122	232,230	164,186	141	203	0.000104581	0.0155382	0.681,0.777,0.768,0.816	0.671,0.64	0.105
1375	ENSG00000103546.14	SLC6A2	chr16	+	55705849	55706087	55719054	55719193	55690555	55690880	55727921	55728025	1375	1787,1904,349,601	522,546,88,125	584,629	245,266	337	238	1.71972e-05	0.00421588	0.707,0.711,0.737,0.772	0.627,0.625	0.106
11445	ENSG00000051180.12	RAD51	chr15	+	41001222	41001314	41011002	41011097	40993261	40993399	41020908	41021022	11445	11,16,3,5	79,57,23,75	2,2	83,78	191	194	2.44681e-05	0.00537166	0.124,0.222,0.117,0.063	0.024,0.025	0.107
3434	ENSG00000215039.2	CD27-AS1	chr12	-	6557805	6557903	6559506	6560146	6557155	6557316	6560634	6560678	3434	283,301,574,877	140,141,194,305	310,308	228,187	739	197	2.59643e-05	0.00553491	0.35,0.363,0.441,0.434	0.266,0.305	0.111
5839	ENSG00000256053.3	APOPT1	chr14	+	104029551	104029716	104040443	104040507	104029389	104029461	104053610	104053701	5839	47,32,48,97	90,84,140,185	17,12	83,79	264	163	2.19575e-05	0.00520923	0.244,0.19,0.175,0.245	0.112,0.086	0.114
11154	ENSG00000055211.8	GINM1	chr6	+	149893642	149893739	149899957	149900109	149893420	149893480	149900969	149901126	11154	122,97,104,152	200,187,198,293	135,118	372,404	196	251	5.67485e-05	0.00964321	0.439,0.399,0.402,0.399	0.317,0.272	0.115
8671	ENSG00000182168.10	UNC5C	chr4	-	96143360	96143417	96163579	96163744	96141135	96141327	96171637	96171818	8671	174,184,161,216	134,118,100,123	138,163	148,173	264	156	0.000140736	0.0191674	0.434,0.48,0.488,0.509	0.355,0.358	0.121
14773	ENSG00000146872.13	TLK2	chr17	+	60601596	60601692	60613530	60613698	60600494	60600538	60629662	60629758	14773	41,53,39,49	212,176,181,223	22,17	188,209	195	267	1.09586e-05	0.00335811	0.209,0.292,0.228,0.231	0.138,0.1	0.121
15041	ENSG00000007392.12	LUC7L	chr16	-	270647	270746	277240	278401	258076	258187	279277	279450	15041	561,575,540,672	350,335,247,345	290,288	379,430	1260	198	0	0	0.201,0.212,0.256,0.234	0.107,0.095	0.125
54	ENSG00000178177.10	LCORL	chr4	-	17963525	17963655	17974442	17974508	17910716	17910968	18023220	18023380	54	69,64,47,99	177,165,127,171	49,36	198,173	165	229	0.000154247	0.0204397	0.351,0.35,0.339,0.446	0.256,0.224	0.132
10076	ENSG00000138658.11	C4orf21	chr4	-	113524679	113524853	113527163	113527247	113510785	113511030	113530534	113530585	10076	67,62,37,48	9,11,5,9	55,82	30,31	183	273	1.41052e-05	0.0039627	0.917,0.894,0.917,0.888	0.732,0.798	0.139
642	ENSG00000135049.11	AGTPBP1	chr9	-	88261235	88261333	88270057	88270115	88257741	88257858	88272349	88272558	642	45,34,45,40	163,146,84,136	27,19	143,207	157	197	0.000111662	0.0162618	0.257,0.226,0.402,0.27	0.192,0.103	0.141
13919	ENSG00000031823.10	RANBP3	chr19	-	5941809	5941846	5957928	5957984	5941631	5941718	5978071	5978104	13919	34,23,41,43	89,90,84,94	12,14	89,90	155	136	2.15386e-05	0.00519363	0.251,0.183,0.3,0.286	0.106,0.12	0.142
1852	ENSG00000159788.14	RGS12	chr4	+	3344663	3344780	3388142	3388164	3317794	3319778	3415798	3415968	1852	19,20,17,15	1,0,0,2	27,26	4,4	216	121	0.000359475	0.0376836	0.914,1.0,1.0,0.808	0.791,0.785	0.143
10277	ENSG00000197586.8	ENTPD6	chr20	+	25199185	25199250	25201867	25201969	25198137	25198217	25203473	25203614	10277	129,127,97,154	76,94,62,91	92,101	118,106	164	201	5.14415e-05	0.0093414	0.675,0.623,0.657,0.675	0.489,0.539	0.143
10134	ENSG00000117335.14	CD46	chr1	+	207941123	207941168	207943665	207943707	207940357	207940540	207956636	207956675	10134	240,263,269,386	303,285,242,350	219,220	391,444	144	141	7.53236e-08	9.2328e-05	0.437,0.475,0.521,0.519	0.354,0.327	0.147
10640	ENSG00000196998.11	WDR45	chrX	-	48934088	48934183	48935301	48935406	48933524	48933604	48935495	48935570	10640	58,83,87,112	70,81,99,146	41,43	98,89	204	194	0.00012657	0.0179146	0.441,0.494,0.455,0.422	0.285,0.315	0.153
2712	ENSG00000125648.10	SLC25A23	chr19	-	6444161	6444312	6453991	6454099	6438457	6438545	6454333	6454486	2712	57,47,76,138	30,37,55,83	70,79	82,103	207	250	0.000103477	0.015531	0.696,0.605,0.625,0.668	0.508,0.481	0.154
11134	ENSG00000018189.8	RUFY3	chr4	+	71654522	71654690	71660511	71660611	71650512	71650596	71665857	71665922	11134	451,483,666,755	60,88,91,139	351,365	128,133	267	199	5.42316e-11	1.99423e-07	0.849,0.804,0.845,0.802	0.671,0.672	0.154
12968	ENSG00000100211.6	CBY1	chr22	+	39052960	39053148	39061550	39061690	39052680	39052755	39064021	39064137	12968	75,67,40,62	57,72,64,84	51,56	149,104	287	239	0.000430641	0.0411318	0.523,0.437,0.342,0.381	0.222,0.31	0.155
5328	ENSG00000079616.8	KIF22	chr16	+	29816134	29816347	29816435	29816495	29815318	29815428	29816583	29816674	5328	260,256,182,239	247,92,138,117	273,304	310,371	312	159	0.000186231	0.0236591	0.349,0.586,0.402,0.51	0.31,0.295	0.159
15454	ENSG00000184182.14	UBE2F	chr2	+	238939196	238939254	238940862	238940895	238933982	238934053	238944518	238944581	15454	154,174,174,258	73,72,56,80	108,101	89,67	157	132	1.01259e-05	0.00323785	0.639,0.67,0.723,0.731	0.505,0.559	0.159
10451	ENSG00000054965.6	FAM168A	chr11	-	73141734	73141815	73179449	73179537	73122438	73122581	73308967	73309228	10451	59,69,51,78	2,3,5,10	50,65	22,11	187	180	8.27915e-05	0.0128187	0.966,0.957,0.908,0.882	0.686,0.85	0.16
12992	ENSG00000167733.9	HSD11B1L	chr19	+	5684999	5685130	5686426	5686538	5684829	5684916	5686910	5687002	12992	29,30,9,6	0,1,0,0	10,17	1,5	230	211	0.000155919	0.0204769	1.0,0.965,1.0,1.0	0.902,0.757	0.162
7568	ENSG00000107643.11	MAPK8	chr10	+	49632130	49632202	49632556	49632628	49628197	49628363	49633930	49634113	7568	64,66,102,156	155,126,127,162	46,37	138,146	171	171	5.26416e-05	0.00937225	0.292,0.344,0.445,0.491	0.25,0.202	0.167
15250	ENSG00000166169.12	POLL	chr10	-	103342519	103342648	103344358	103344676	103340004	103340173	103345072	103345235	15250	68,69,132,154	46,29,49,70	78,69	59,80	417	228	0.00049348	0.0448087	0.447,0.565,0.596,0.546	0.42,0.32	0.168
813	ENSG00000122884.8	P4HA1	chr10	-	74803644	74803715	74804738	74804809	74790024	74790128	74806682	74806859	813	206,229,202,284	424,386,141,231	190,229	474,546	170	170	0.000456585	0.0428793	0.327,0.372,0.589,0.551	0.286,0.295	0.169
15300	ENSG00000101489.14	CELF4	chr18	-	34839143	34839227	34844636	34844720	34833729	34833901	34846495	34846561	15300	9,5,7,10	0,0,0,1	19,38	6,7	183	183	2.91741e-06	0.00130037	1.0,1.0,1.0,0.909	0.76,0.844	0.175
1671	ENSG00000068745.10	IP6K2	chr3	-	48748799	48748892	48752747	48752960	48732522	48732851	48754589	48754621	1671	21,41,25,26	2,1,0,0	23,14	2,4	312	192	0.000523838	0.0466978	0.866,0.962,1.0,1.0	0.876,0.683	0.177
5694	ENSG00000101901.6	ALG13	chrX	+	110979941	110980107	110987895	110988132	110973622	110973655	110996017	110996058	5694	50,60,57,94	35,20,24,39	37,33	42,30	265	336	0.000336524	0.0358691	0.644,0.792,0.751,0.753	0.528,0.582	0.18
5695	ENSG00000101901.6	ALG13	chrX	+	110979941	110980107	110987895	110988132	110973752	110973808	110996017	110996058	5695	49,60,58,94	35,20,23,39	37,33	42,32	265	336	0.000188192	0.0236591	0.64,0.792,0.762,0.753	0.528,0.567	0.189
2383	ENSG00000171302.12	CANT1	chr17	-	76996181	76996352	77001453	77001563	76994229	76994368	77005745	77005875	2383	4,4,12,4	23,17,35,37	1,0	29,29	209	270	1.23693e-05	0.0036388	0.183,0.233,0.307,0.123	0.043,0.0	0.19
3142	ENSG00000108825.13	PTGES3L-AARSD1	chr17	-	41123623	41123713	41131186	41131285	41122305	41122359	41131394	41131461	3142	70,55,22,40	40,38,27,25	27,37	45,58	198	189	0.000562144	0.0489983	0.626,0.58,0.438,0.604	0.364,0.378	0.191
4528	ENSG00000215883.5	CYB5RL	chr1	-	54653324	54653412	54661091	54661388	54649833	54649938	54662041	54662164	4528	52,75,47,47	3,3,0,5	57,61	15,8	396	187	0.000194249	0.0241734	0.891,0.922,1.0,0.816	0.642,0.783	0.195
5657	ENSG00000250125.1	RP11-707A18.1	chr4	-	65805673	65805754	65843206	65843347	65803324	65803557	65870120	65870218	5657	6,10,3,4	2,1,0,0	6,11	1,6	240	180	0.00051794	0.0464535	0.692,0.882,1.0,1.0	0.818,0.579	0.195
2286	ENSG00000076928.13	ARHGEF1	chr19	+	42392134	42392177	42392262	42392349	42388436	42388560	42392822	42392936	2286	10,12,13,11	43,41,27,26	4,5	54,42	142	186	0.000320314	0.0349	0.233,0.277,0.387,0.357	0.088,0.135	0.202
2768	ENSG00000188191.10	PRKAR1B	chr7	-	618892	619014	624144	624205	591025	591107	635782	635941	2768	33,28,74,121	11,5,32,55	39,36	40,33	160	221	5.70372e-05	0.00964321	0.806,0.886,0.762,0.752	0.574,0.601	0.214
2985	ENSG00000153113.19	CAST	chr5	+	96062497	96062563	96065315	96065429	96058342	96058402	96071875	96071944	2985	21,20,53,41	45,54,71,61	12,11	71,56	165	213	1.48174e-05	0.0039627	0.376,0.323,0.491,0.465	0.179,0.202	0.223
14858	ENSG00000152556.11	PFKM	chr12	+	48501147	48501238	48501854	48501977	48499705	48499920	48516549	48516642	14858	1,0,8,5	2,1,15,26	0,0	7,4	190	222	0.000149606	0.0200051	0.369,0.0,0.384,0.183	0.0,0.0	0.234
1123	ENSG00000145428.10	RNF175	chr4	-	154649358	154649513	154666820	154666879	154644502	154644610	154669796	154669979	1123	0,3,5,7	4,4,24,33	1,0	29,20	158	254	0.000184626	0.0236591	0.0,0.547,0.251,0.254	0.053,0.0	0.237
6065	ENSG00000178971.9	CTC1	chr17	-	8132044	8132210	8132459	8132524	8131820	8131947	8132619	8132764	6065	6,4,0,2	17,15,6,8	0,0	8,12	164	265	5.01196e-05	0.00922972	0.363,0.301,0.0,0.288	0.0,0.0	0.238
10077	ENSG00000138658.11	C4orf21	chr4	-	113524679	113524853	113530534	113530585	113510785	113511030	113533679	113533744	10077	18,11,11,18	9,11,5,9	21,14	30,31	150	273	0.0005663	0.0489983	0.784,0.645,0.8,0.784	0.56,0.451	0.248
8973	ENSG00000101391.16	CDK5RAP1	chr20	-	31961920	31962018	31979947	31980048	31958304	31958435	31989233	31989258	8973	5,9,17,19	0,0,1,0	10,5	2,3	200	197	0.000314061	0.0348348	1.0,1.0,0.944,1.0	0.831,0.621	0.26
1887	ENSG00000086666.14	ZFAND6	chr15	+	80365607	80365672	80367505	80367657	80364931	80364989	80390757	80390920	1887	7,5,24,11	0,0,0,6	5,7	3,7	164	251	0.000310769	0.0348348	1.0,1.0,1.0,0.737	0.718,0.605	0.273
347	ENSG00000169432.10	SCN9A	chr2	-	167160540	167160632	167160747	167160839	167159599	167159812	167162301	167162430	347	114,99,34,78	3,11,5,6	20,22	11,13	191	191	8.53154e-09	2.09151e-05	0.974,0.9,0.872,0.929	0.645,0.629	0.282
11372	ENSG00000164674.11	SYTL3	chr6	+	159134831	159134910	159139118	159139243	159129353	159129423	159146534	159146669	11372	0,0,3,8	3,2,5,4	0,0	1,3	178	224	0.000460598	0.0428793	0.0,0.0,0.43,0.716	0.0,0.0	0.286
4189	ENSG00000138380.13	CARF	chr2	+	203789079	203789138	203806582	203806703	203782599	203782766	203807462	203807690	4189	5,7,8,4	21,22,12,18	1,0	27,16	158	220	4.08807e-06	0.00159571	0.249,0.307,0.481,0.236	0.049,0.0	0.294
2897	ENSG00000111215.7	PRR4	chr12	-	11035659	11035695	11036752	11036874	11035150	11035297	11126253	11126320	2897	14,11,7,4	12,17,4,8	1,1	9,13	221	135	2.78215e-05	0.00576375	0.416,0.283,0.517,0.234	0.064,0.045	0.308
1556	ENSG00000049323.11	LTBP1	chr2	+	33505105	33505225	33518226	33518349	33500867	33500990	33525517	33525640	1556	1,6,9,7	7,6,7,13	1,0	6,8	219	222	0.000108749	0.0159959	0.126,0.503,0.566,0.353	0.145,0.0	0.314
6068	ENSG00000196511.9	TPK1	chr7	-	144245583	144245695	144288515	144288662	144149033	144150756	144320258	144320354	6068	0,4,5,22	7,5,4,11	1,0	6,2	246	211	0.000582603	0.0498227	0.0,0.407,0.517,0.632	0.125,0.0	0.327
10415	ENSG00000198626.11	RYR2	chr1	+	237843755	237843877	237850754	237850804	237841347	237841412	237862264	237862325	10415	4,5,11,23	0,0,0,0	11,4	2,3	221	149	0.000128433	0.0179916	1.0,1.0,1.0,1.0	0.788,0.473	0.369
12993	ENSG00000167733.9	HSD11B1L	chr19	+	5685003	5685130	5686426	5686538	5684829	5684916	5686910	5687002	12993	11,11,2,7	0,1,0,0	2,7	1,5	226	211	2.42116e-06	0.0011588	1.0,0.911,1.0,1.0	0.651,0.567	0.369
538	ENSG00000119509.8	INVS	chr9	+	102977206	102977322	102977682	102977770	102894151	102894236	102988343	102988517	538	9,1,4,5	12,9,3,3	0,0	12,10	215	187	1.23908e-06	0.000650913	0.395,0.088,0.537,0.592	0.0,0.0	0.403
9122	ENSG00000178852.11	EFCAB13	chr17	+	45425173	45425317	45438743	45438887	45422381	45422464	45447802	45447874	9122	2,4,2,8	9,2,5,6	0,0	3,8	243	243	6.28951e-06	0.00220268	0.182,0.667,0.286,0.571	0.0,0.0	0.426
5156	ENSG00000088986.6	DYNLL1	chr12	+	120925919	120925980	120933086	120933240	120907659	120907907	120934218	120934350	5156	1,3,3,1	2,7,4,3	0,0	1,2	160	253	2.3897e-05	0.00532576	0.442,0.404,0.543,0.345	0.0,0.0	0.434
8333	ENSG00000105662.11	CRTC1	chr19	+	18882251	18882356	18885709	18885796	18879294	18879603	18886450	18886631	8333	12,6,11,10	11,7,3,6	3,0	9,13	204	186	2.75025e-05	0.00576375	0.499,0.439,0.77,0.603	0.233,0.0	0.461
5155	ENSG00000088986.6	DYNLL1	chr12	+	120925919	120925980	120931605	120931728	120907659	120907907	120933086	120933240	5155	1,3,3,1	1,4,3,3	0,0	1,8	160	222	3.7879e-06	0.00154767	0.581,0.51,0.581,0.316	0.0,0.0	0.497
10040	ENSG00000273294.1	RP11-1084J3.4	chr5	-	34020691	34020847	34024013	34024113	34005860	34006004	34028858	34028988	10040	10,3,2,5	0,2,0,4	3,2	7,8	199	255	5.28857e-05	0.00937225	1.0,0.658,1.0,0.616	0.354,0.243	0.52
5751	ENSG00000181666.13	HKR1	chr19	+	37835511	37835676	37837789	37837954	37826070	37826159	37838091	37838218	5751	0,6,3,6	1,1,1,1	0,0	1,1	264	264	1.73639e-08	3.64865e-05	0.0,0.857,0.75,0.857	0.0,0.0	0.616
8310	ENSG00000156398.8	SFXN2	chr10	+	104476370	104476468	104477459	104477537	104474392	104474438	104486368	104486554	8310	3,4,10,4	0,2,0,4	3,0	6,3	197	177	0.00040651	0.0398624	1.0,0.642,1.0,0.473	0.31,0.0	0.624
12015	ENSG00000088727.8	KIF9	chr3	-	47312726	47312951	47315041	47315148	47308669	47308753	47316814	47316980	12015	2,3,10,19	0,1,30,22	0,0	8,1	206	324	8.52043e-07	0.000464174	1.0,0.825,0.344,0.576	0.0,0.0	0.686
1768	ENSG00000087085.9	ACHE	chr7	-	100488789	100488959	100490328	100490439	100487831	100487956	100490785	100491854	1768	4,6,15,8	2,4,4,8	0,0	1,3	210	269	5.20218e-06	0.00186631	0.719,0.658,0.828,0.562	0.0,0.0	0.692
3817	ENSG00000137868.14	STRA6	chr15	-	74489678	74489764	74490092	74490203	74487642	74487809	74494495	74494623	3817	4,5,1,2	1,2,0,4	0,0	3,2	210	185	2.85007e-07	0.00026201	0.779,0.688,1.0,0.306	0.0,0.0	0.693
11670	ENSG00000103599.15	IQCH	chr15	+	67555459	67555554	67596676	67596793	67553609	67553732	67636400	67636529	11670	2,7,11,5	3,0,4,3	0,0	2,2	194	216	4.4856e-07	0.000299903	0.426,1.0,0.754,0.65	0.0,0.0	0.707
11973	ENSG00000204843.8	DCTN1	chr2	-	74601449	74601467	74603868	74603889	74600054	74600075	74604558	74604593	11973	4,1,1,1	1,0,0,0	0,2	1,4	120	117	3.2724e-07	0.000263461	0.796,1.0,1.0,1.0	0.0,0.328	0.785
11797	ENSG00000148357.12	HMCN2	chr9	+	133266590	133266750	133266836	133266961	133266363	133266507	133267321	133267505	11797	2,1,2,2	0,0,0,4	0,0	2,1	259	224	2.80018e-08	4.11878e-05	1.0,1.0,1.0,0.302	0.0,0.0	0.826
9995	ENSG00000161955.12	TNFSF13	chr17	+	7462940	7463019	7463167	7463210	7462384	7462614	7463365	7463484	9995	2,3,2,1	2,0,0,0	0,0	1,1	178	142	4.10085e-11	1.99423e-07	0.444,1.0,1.0,1.0	0.0,0.0	0.861

## Sheet: BE2C RI
id	geneid	genesymbol	chr	strand	riexonstart_0base	riexonend	upstreames	upstreamee	downstreames	downstreamee	v12	ijc_sample_1	sjc_sample_1	ijc_sample_2	sjc_sample_2	incformlen	skipformlen	pvalue	fdr	inclevel1	inclevel2	incleveldifference
428	ENSG00000168970.16	JMJD7-PLA2G4B	chr15	+	42134390	42134789	42134390	42134474	42134751	42134789	428	2,0,3,1	2,3,1,2	2,2	0,0	376	99	1.11111e-12	2.16833e-09	0.208,0.0,0.441,0.116	1.0,1.0	-0.809
623	ENSG00000198467.9	TPM2	chr9	-	35684484	35685136	35684484	35684547	35685060	35685136	623	1,4,2,5	2,4,1,0	3,6	0,0	612	99	5.67691e-08	1.70438e-05	0.075,0.139,0.244,1.0	1.0,1.0	-0.635
1875	ENSG00000065357.15	DGKA	chr12	+	56333198	56334217	56333198	56333954	56334097	56334217	1875	0,0,0,0	3,9,1,6	2,3	0,4	242	99	0.00268682	0.0440616	0.0,0.0,0.0,0.0	1.0,0.235	-0.617
2515	ENSG00000110888.13	CAPRIN2	chr12	-	30867892	30869610	30867892	30868078	30869441	30869610	2515	33,32,39,32	2,4,9,14	36,34	0,1	1462	99	1.6925e-05	0.00129526	0.528,0.351,0.227,0.134	1.0,0.697	-0.538
3755	ENSG00000185133.9	INPP5J	chr22	+	31522598	31523518	31522598	31522707	31523342	31523518	3755	4,6,1,2	1,2,0,1	15,8	0,0	734	99	0.00124464	0.0262585	0.35,0.288,1.0,0.212	1.0,1.0	-0.538
993	ENSG00000169592.10	INO80E	chr16	+	30012532	30015978	30012532	30012851	30015888	30015978	993	262,212,138,161	13,10,6,7	200,151	1,0	3136	99	1.22323e-07	2.98391e-05	0.389,0.401,0.421,0.421	0.863,1.0	-0.523
4381	ENSG00000196547.10	MAN2A2	chr15	+	91455272	91455894	91455272	91455509	91455746	91455894	4381	9,13,7,17	3,3,4,3	3,6	0,0	336	99	3.12604e-06	0.000358851	0.469,0.561,0.34,0.625	1.0,1.0	-0.501
1153	ENSG00000099840.9	IZUMO4	chr19	+	2098434	2098803	2098434	2098449	2098785	2098803	1153	2,7,2,14	1,0,1,5	2,8	0,0	435	99	0.000112133	0.00491749	0.313,1.0,0.313,0.389	1.0,1.0	-0.496
238	ENSG00000017621.11	MAGIX	chrX	+	49021044	49021428	49021044	49021127	49021200	49021428	238	2,4,3,4	4,0,2,4	3,2	0,0	172	99	2.61942e-06	0.000309805	0.223,1.0,0.463,0.365	1.0,1.0	-0.487
239	ENSG00000017621.11	MAGIX	chrX	+	49021044	49021428	49021044	49021127	49021245	49021428	239	2,4,4,5	3,6,1,0	3,2	0,0	217	99	7.09702e-06	0.000629538	0.233,0.233,0.646,1.0	1.0,1.0	-0.472
3182	ENSG00000167995.11	BEST1	chr11	+	61727363	61730365	61727363	61727515	61729726	61730365	3182	7,6,11,6	0,0,8,4	6,8	0,0	2310	99	3.44426e-06	0.000373415	1.0,1.0,0.056,0.06	1.0,1.0	-0.471
1848	ENSG00000185880.8	TRIM69	chr15	+	45048565	45051052	45048565	45048661	45050818	45051052	1848	2,2,7,6	0,0,3,1	3,7	0,0	2256	99	0.000132435	0.00557343	1.0,1.0,0.093,0.208	1.0,1.0	-0.425
1300	ENSG00000171953.11	ATPAF2	chr17	-	17924436	17924977	17924436	17924552	17924735	17924977	1300	0,0,1,7	2,4,2,0	2,2	1,0	282	99	0.0014889	0.0292019	0.0,0.0,0.149,1.0	0.413,1.0	-0.419
4462	ENSG00000130822.11	PNCK	chrX	-	152937334	152937655	152937334	152937473	152937580	152937655	4462	0,1,2,2	3,4,3,14	5,1	1,1	206	99	0.00162974	0.0311808	0.0,0.107,0.243,0.064	0.706,0.325	-0.412
3181	ENSG00000167995.11	BEST1	chr11	+	61725617	61727050	61725617	61725973	61726969	61727050	3181	4,2,4,13	0,0,2,4	3,1	0,0	1095	99	9.8802e-05	0.00464389	1.0,1.0,0.153,0.227	1.0,1.0	-0.405
3634	ENSG00000142046.10	TMEM91	chr19	+	41888676	41889988	41888676	41888826	41889767	41889988	3634	22,24,18,24	4,2,0,2	11,11	0,0	1040	99	4.579e-06	0.000470312	0.344,0.533,1.0,0.533	1.0,1.0	-0.397
259	ENSG00000172660.7	TAF15	chr17	+	34147027	34147441	34147027	34147079	34147335	34147441	259	12,15,5,20	2,3,3,3	16,9	1,0	355	99	0.000662995	0.016803	0.626,0.582,0.317,0.65	0.817,1.0	-0.365
2909	ENSG00000163704.7	PRRT3	chr3	-	9987225	9989685	9987225	9987395	9987768	9989685	2909	10,10,19,37	5,2,4,12	6,11	1,0	472	99	0.0012938	0.026708	0.296,0.512,0.499,0.393	0.557,1.0	-0.353
2919	ENSG00000142784.11	WDTC1	chr1	+	27630111	27631684	27630111	27630286	27631549	27631684	2919	34,21,26,37	1,1,4,0	27,29	0,0	1362	99	0.000683655	0.0171045	0.712,0.604,0.321,1.0	1.0,1.0	-0.341
4776	ENSG00000089195.10	TRMT6	chr20	-	5921698	5922682	5921698	5921785	5922596	5922682	4776	33,36,42,41	4,3,0,3	21,30	0,0	910	99	1.01131e-05	0.000858079	0.473,0.566,1.0,0.598	1.0,1.0	-0.341
536	ENSG00000112096.12	SOD2	chr6	-	160100095	160103670	160100095	160100330	160103505	160103670	536	3530,3258,3936,4933	48,68,295,388	3226,3540	20,32	3274	99	1.63697e-06	0.000228182	0.69,0.592,0.287,0.278	0.83,0.77	-0.338
440	ENSG00000244687.7	UBE2V1	chr20	-	48732021	48732491	48732021	48732158	48732235	48732491	440	10,6,8,14	0,3,7,2	18,14	0,0	176	99	2.312e-05	0.00155582	1.0,0.529,0.391,0.797	1.0,1.0	-0.321
4491	ENSG00000239382.6	ALKBH6	chr19	-	36503922	36504324	36503922	36503991	36504211	36504324	4491	13,14,10,20	3,1,1,3	19,14	0,0	319	99	4.09759e-05	0.002387	0.574,0.813,0.756,0.674	1.0,1.0	-0.296
3665	ENSG00000112531.12	QKI	chr6	+	163984451	163991177	163984451	163984751	163985698	163991177	3665	63,66,71,96	19,6,25,53	54,54	3,5	1046	99	0.00129567	0.026708	0.239,0.51,0.212,0.146	0.63,0.505	-0.291
5173	ENSG00000214087.4	ARL16	chr17	-	79649063	79649705	79649063	79649179	79649472	79649705	5173	22,35,28,33	4,1,4,3	23,35	0,0	392	99	1.95974e-05	0.0013907	0.581,0.898,0.639,0.735	1.0,1.0	-0.287
2207	ENSG00000149823.3	VPS51	chr11	+	64874658	64875199	64874658	64874844	64875052	64875199	2207	2,8,5,4	4,1,0,1	6,11	0,1	307	99	0.00159112	0.030706	0.139,0.721,1.0,0.563	1.0,0.78	-0.284
2685	ENSG00000161526.10	SAP30BP	chr17	+	73701690	73702172	73701690	73701773	73702087	73702172	2685	28,24,15,13	1,2,2,2	11,21	0,0	413	99	0.000550059	0.0152261	0.87,0.742,0.643,0.609	1.0,1.0	-0.284
4676	ENSG00000158106.8	RHPN1	chr8	+	144461998	144462345	144461998	144462155	144462231	144462345	4676	0,2,0,0	1,0,2,3	4,4	1,4	175	99	0.000575411	0.0154885	0.0,1.0,0.0,0.0	0.694,0.361	-0.277
3636	ENSG00000142046.10	TMEM91	chr19	+	41888676	41889988	41888676	41888826	41889790	41889988	3636	25,25,22,25	0,2,0,4	11,12	0,0	1063	99	0.00221469	0.0384175	1.0,0.538,1.0,0.368	1.0,1.0	-0.273
4864	ENSG00000166471.6	TMEM41B	chr11	-	9302200	9305140	9302200	9302588	9304917	9305140	4864	839,827,1021,1293	15,31,25,29	1200,1242	6,6	2428	99	4.80288e-09	2.08285e-06	0.695,0.521,0.625,0.645	0.891,0.894	-0.271
2276	ENSG00000104880.13	ARHGEF18	chr19	+	7535011	7537363	7535011	7535201	7535422	7537363	2276	48,22,23,36	21,11,18,19	48,53	13,6	320	99	0.00266029	0.0438107	0.414,0.382,0.283,0.37	0.533,0.732	-0.27
5243	ENSG00000214078.7	CPNE1	chr20	-	34213965	34214725	34213965	34214303	34214484	34214725	5243	23,17,3,15	2,3,0,6	24,21	0,0	280	99	1.89211e-05	0.00137342	0.803,0.667,1.0,0.469	1.0,1.0	-0.265
2262	ENSG00000172936.8	MYD88	chr3	+	38181878	38182339	38181878	38182059	38182247	38182339	2262	0,0,0,2	6,12,11,19	4,3	6,2	287	99	3.89393e-05	0.00230273	0.0,0.0,0.0,0.035	0.187,0.341	-0.255
3075	ENSG00000133466.9	C1QTNF6	chr22	-	37576206	37578775	37576206	37576907	37578191	37578775	3075	205,234,74,79	0,0,4,7	71,98	0,0	1383	99	0.00050191	0.0141953	1.0,1.0,0.57,0.447	1.0,1.0	-0.246
986	ENSG00000167380.12	ZNF226	chr19	+	44669740	44669960	44669740	44669766	44669909	44669960	986	40,18,19,30	6,4,3,6	16,16	1,0	242	99	0.00036302	0.0114263	0.732,0.648,0.722,0.672	0.867,1.0	-0.24
1449	ENSG00000114026.17	OGG1	chr3	+	9798450	9798875	9798450	9798500	9798727	9798875	1449	33,45,19,35	3,1,7,3	59,37	1,0	326	99	0.000137318	0.00570161	0.77,0.932,0.452,0.78	0.947,1.0	-0.24
1966	ENSG00000139291.9	TMEM19	chr12	+	72094611	72097836	72094611	72094805	72097756	72097836	1966	1748,1709,924,1269	7,8,24,39	1723,1842	3,6	3050	99	0.000104541	0.00474448	0.89,0.874,0.555,0.514	0.949,0.909	-0.221
1245	ENSG00000010295.15	IFFO1	chr12	-	6657230	6657711	6657230	6657326	6657590	6657711	1245	29,28,27,32	66,57,48,53	38,36	15,26	363	99	3.76715e-06	0.000397384	0.107,0.118,0.133,0.141	0.409,0.274	-0.217
974	ENSG00000100167.15	SEPT3	chr22	+	42390624	42394225	42390624	42390718	42392905	42394225	974	207,178,291,439	0,2,9,12	342,375	1,1	2286	99	0.00092557	0.0213757	1.0,0.794,0.583,0.613	0.937,0.942	-0.192
4272	ENSG00000185664.10	PMEL	chr12	-	56350732	56351455	56350732	56350843	56350969	56351455	4272	14,21,2,2	3,6,0,0	7,7	0,0	225	99	0.000219821	0.0084114	0.672,0.606,1.0,1.0	1.0,1.0	-0.18
1601	ENSG00000198677.6	TTC37	chr5	-	94852228	94852764	94852228	94852290	94852619	94852764	1601	32,18,17,28	0,1,3,4	24,32	1,0	428	99	0.00227901	0.0393584	1.0,0.806,0.567,0.618	0.847,1.0	-0.176
2981	ENSG00000177082.8	WDR73	chr15	-	85188701	85189579	85188701	85189067	85189414	85189579	2981	68,55,37,71	53,57,46,70	52,53	16,30	446	99	0.00130893	0.0267474	0.222,0.176,0.151,0.184	0.419,0.282	-0.167
3919	ENSG00000166411.9	IDH3A	chr15	+	78449249	78449973	78449249	78449504	78449889	78449973	3919	0,10,8,14	25,17,53,43	7,7	5,6	484	99	0.00074283	0.0182344	0.0,0.107,0.03,0.062	0.223,0.193	-0.158
3876	ENSG00000172262.7	ZNF131	chr5	+	43161350	43162033	43161350	43161708	43161810	43162033	3876	83,102,65,94	91,127,120,174	125,115	117,63	201	99	0.000398994	0.0120719	0.31,0.283,0.211,0.21	0.345,0.473	-0.155
426	ENSG00000168970.16	JMJD7-PLA2G4B	chr15	+	42128672	42129138	42128672	42128749	42128978	42129138	426	1,4,0,1	18,22,6,20	4,6	5,10	328	99	0.000132803	0.00557343	0.016,0.052,0.0,0.015	0.194,0.153	-0.153
312	ENSG00000121741.12	ZMYM2	chr13	+	20567202	20568059	20567202	20567704	20567965	20568059	312	738,694,615,803	159,216,307,449	849,812	172,170	360	99	0.000801549	0.0193114	0.561,0.469,0.355,0.33	0.576,0.568	-0.143
1965	ENSG00000139291.9	TMEM19	chr12	+	72094611	72097836	72094611	72094658	72097756	72097836	1965	1964,1888,1079,1490	5,2,17,17	1892,2056	4,1	3197	99	0.000172183	0.00678819	0.924,0.967,0.663,0.731	0.936,0.985	-0.139
524	ENSG00000111261.9	MANSC1	chr12	-	12496025	12496348	12496025	12496107	12496209	12496348	524	71,48,88,145	2,7,18,22	90,101	5,2	201	99	0.000648678	0.0166686	0.946,0.772,0.707,0.764	0.899,0.961	-0.133
1788	ENSG00000174365.15	SNHG11	chr20	+	37078904	37079564	37078904	37079090	37079175	37079564	1788	7,11,6,12	58,76,54,87	16,13	34,31	184	99	4.72493e-05	0.00267267	0.061,0.072,0.056,0.069	0.202,0.184	-0.129
1522	ENSG00000137504.9	CREBZF	chr11	-	85371378	85372793	85371378	85371641	85372680	85372793	1522	443,478,508,564	2,9,19,7	782,765	1,4	1138	99	2.77003e-05	0.00173355	0.951,0.822,0.699,0.875	0.986,0.943	-0.128
3802	ENSG00000139192.7	TAPBPL	chr12	+	6566571	6566910	6566571	6566709	6566834	6566910	3802	52,55,30,50	2,5,1,5	36,27	0,0	224	99	0.000333508	0.0108812	0.92,0.829,0.93,0.815	1.0,1.0	-0.126
125	ENSG00000147416.6	ATP6V1B2	chr8	+	20070292	20074835	20070292	20070416	20074730	20074835	125	777,782,636,834	5,1,4,0	735,695	0,0	4413	99	0.000820236	0.0195206	0.777,0.946,0.781,1.0	1.0,1.0	-0.124
677	ENSG00000131876.12	SNRPA1	chr15	-	101825930	101827215	101825930	101826006	101827112	101827215	677	103,118,140,221	40,40,41,71	110,113	18,21	1205	99	0.00211619	0.037205	0.175,0.195,0.219,0.204	0.334,0.307	-0.122
3064	ENSG00000178761.10	FAM219B	chr15	-	75192332	75194404	75192332	75192478	75194290	75194404	3064	2125,2252,1458,1943	10,13,17,30	1684,1745	4,1	1911	99	2.9775e-07	6.1164e-05	0.917,0.9,0.816,0.77	0.956,0.989	-0.122
1472	ENSG00000143774.12	GUK1	chr1	+	228335106	228335400	228335106	228335245	228335321	228335400	1472	92,95,99,119	19,21,18,26	106,91	10,9	175	99	0.00308987	0.0486281	0.733,0.719,0.757,0.721	0.857,0.851	-0.121
4999	ENSG00000101199.8	ARFGAP1	chr20	+	61918915	61921140	61918915	61920848	61921029	61921140	4999	304,318,219,310	19,12,32,50	320,335	12,12	280	99	0.000436727	0.0129882	0.85,0.904,0.708,0.687	0.904,0.908	-0.119
30	ENSG00000121716.14	PILRB	chr7	+	99950995	99951635	99950995	99951106	99951517	99951635	30	118,94,131,117	4,5,1,3	123,129	1,0	510	99	0.00101454	0.0230217	0.851,0.785,0.962,0.883	0.96,1.0	-0.11
250	ENSG00000214655.6	ZSWIM8	chr10	+	75560397	75560953	75560397	75560517	75560842	75560953	250	24,23,19,20	2,0,4,1	13,7	1,0	424	99	0.0016422	0.0312659	0.737,1.0,0.526,0.824	0.752,1.0	-0.104
1654	ENSG00000169714.12	CNBP	chr3	-	128889921	128890381	128889921	128890126	128890288	128890381	1654	19,15,24,30	55,37,58,114	36,29	40,47	261	99	0.000334548	0.0108812	0.116,0.133,0.136,0.091	0.254,0.19	-0.103
1523	ENSG00000137504.9	CREBZF	chr11	-	85374567	85376146	85374567	85374645	85374858	85376146	1523	312,331,187,343	20,21,31,31	573,573	24,27	312	99	0.00146521	0.0291513	0.832,0.833,0.657,0.778	0.883,0.871	-0.102
4171	ENSG00000182196.9	ARL6IP4	chr12	+	123465675	123466426	123465675	123465846	123466117	123466426	4171	82,68,51,98	79,107,81,156	78,68	51,62	370	99	0.000453993	0.0132234	0.217,0.145,0.144,0.144	0.29,0.227	-0.096
2164	ENSG00000029364.7	SLC39A9	chr14	+	69925079	69929098	69925079	69925446	69928413	69929098	2164	3151,2817,3901,5027	10,18,20,25	5463,6032	7,7	3066	99	1.69726e-07	3.68022e-05	0.911,0.835,0.863,0.867	0.962,0.965	-0.095
1883	ENSG00000132950.14	ZMYM5	chr13	-	20425494	20426330	20425494	20425588	20425828	20426330	1883	32,21,17,31	59,58,127,112	39,50	70,53	339	99	6.61538e-06	0.000600461	0.137,0.096,0.038,0.075	0.14,0.216	-0.091
2793	ENSG00000172809.8	RPL38	chr17	+	72199842	72200097	72199842	72199909	72200056	72200097	2793	1120,711,1025,1170	62,38,59,89	880,899	15,15	246	99	1.08842e-11	1.06202e-08	0.879,0.883,0.875,0.841	0.959,0.96	-0.09
340	ENSG00000099624.3	ATP5D	chr19	+	1244313	1244824	1244313	1244439	1244735	1244824	340	849,715,1211,1822	639,712,578,863	1175,1279	505,526	395	99	0.00113914	0.0247392	0.25,0.201,0.344,0.346	0.368,0.379	-0.088
592	ENSG00000174233.7	ADCY6	chr12	-	49164548	49165756	49164548	49164753	49165492	49165756	592	6,9,12,13	46,45,20,35	28,10	16,17	838	99	1.17647e-05	0.000976975	0.015,0.023,0.066,0.042	0.171,0.065	-0.082
2715	ENSG00000197841.10	ZNF181	chr19	+	35230052	35230526	35230052	35230173	35230430	35230526	2715	4,10,6,16	33,14,39,80	6,15	13,17	356	99	0.00241947	0.04094	0.033,0.166,0.041,0.053	0.114,0.197	-0.082
3066	ENSG00000178761.10	FAM219B	chr15	-	75192332	75195127	75192332	75194404	75194944	75195127	3066	900,803,550,716	18,29,20,30	681,728	13,10	639	99	0.00260618	0.0432848	0.886,0.811,0.81,0.787	0.89,0.919	-0.081
1105	ENSG00000160179.14	ABCG1	chr21	+	43707998	43708422	43707998	43708147	43708320	43708422	1105	32,36,56,53	57,61,135,161	53,49	63,66	272	99	0.00112131	0.0246076	0.17,0.177,0.131,0.107	0.234,0.213	-0.077
1645	ENSG00000175061.13	C17orf76-AS1	chr17	+	16342640	16343567	16342640	16343017	16343498	16343567	1645	2308,2254,2158,2787	975,986,1184,1814	2763,2995	964,1041	580	99	4.83449e-05	0.00269557	0.288,0.281,0.237,0.208	0.329,0.329	-0.076
5142	ENSG00000197355.6	UAP1L1	chr9	+	139976449	139978990	139976449	139976516	139977088	139978990	5142	14,16,11,8	45,39,22,26	20,18	24,17	671	99	0.00169351	0.0320863	0.044,0.057,0.069,0.043	0.109,0.135	-0.069
2195	ENSG00000006534.11	ALDH3B1	chr11	+	67782766	67786106	67782766	67782929	67785996	67786106	2195	0,0,2,5	6,1,1,4	10,8	4,2	3166	99	0.000902254	0.0209613	0.0,0.0,0.059,0.038	0.073,0.111	-0.068
3076	ENSG00000234608.3	MAPKAPK5-AS1	chr12	-	112279130	112279514	112279130	112279274	112279487	112279514	3076	226,242,838,941	11,13,4,11	315,402	3,1	312	99	0.00204666	0.0361772	0.867,0.855,0.985,0.964	0.971,0.992	-0.064
2540	ENSG00000138709.13	LARP1B	chr4	+	129028293	129030056	129028293	129028468	129029037	129030056	2540	53,43,56,62	88,69,54,69	68,52	43,45	668	99	0.00229646	0.0394849	0.082,0.085,0.133,0.118	0.19,0.146	-0.063
4669	ENSG00000231074.4	HCG18	chr6	-	30258782	30262741	30258782	30260376	30262247	30262741	4669	389,319,189,249	102,111,162,175	332,409	89,99	1970	99	2.24517e-06	0.000282675	0.161,0.126,0.055,0.067	0.158,0.172	-0.063
3918	ENSG00000105726.12	ATP13A1	chr19	-	19767468	19767725	19767468	19767575	19767655	19767725	3918	3,3,10,8	106,154,109,144	13,22	101,106	179	99	3.3138e-06	0.000369536	0.015,0.011,0.048,0.03	0.066,0.103	-0.058
4376	ENSG00000175197.6	DDIT3	chr12	-	57911051	57911536	57911051	57911221	57911488	57911536	4376	109,93,118,161	124,140,370,514	62,80	76,95	366	99	0.000626673	0.0164155	0.192,0.152,0.079,0.078	0.181,0.186	-0.058
1639	ENSG00000175061.13	C17orf76-AS1	chr17	+	16342640	16343017	16342640	16342728	16342841	16343017	1639	432,380,320,494	872,847,827,1173	406,474	705,729	212	99	0.000847872	0.0199352	0.188,0.173,0.153,0.164	0.212,0.233	-0.053
330	ENSG00000108591.5	DRG2	chr17	+	18002946	18003749	18002946	18003037	18003676	18003749	330	35,30,30,40	50,47,39,64	63,66	58,52	738	99	0.00315412	0.0490459	0.086,0.079,0.094,0.077	0.127,0.145	-0.052
3281	ENSG00000099957.12	P2RX6	chr22	+	21380299	21380618	21380299	21380365	21380540	21380618	3281	3,3,5,6	58,58,70,43	11,9	40,44	274	99	0.000787967	0.0192215	0.018,0.018,0.025,0.048	0.09,0.069	-0.052
3325	ENSG00000168824.10	NSG1	chr4	+	4418961	4420785	4418961	4419654	4420510	4420785	3325	690,698,1353,1726	3,0,16,18	512,553	0,1	955	99	0.000148039	0.00595665	0.96,1.0,0.898,0.909	1.0,0.983	-0.05
4892	ENSG00000235106.4	LINC00094	chr9	+	136890966	136893224	136890966	136891212	136891329	136893224	4892	8,12,7,6	63,51,55,99	22,23	71,105	216	99	0.00279552	0.0450169	0.055,0.097,0.055,0.027	0.124,0.091	-0.049
1537	ENSG00000143416.16	SELENBP1	chr1	-	151341479	151342030	151341479	151341665	151341917	151342030	1537	1,0,0,0	14,9,2,5	6,9	37,43	351	99	0.0005646	0.01541	0.02,0.0,0.0,0.0	0.044,0.056	-0.045
4175	ENSG00000182196.9	ARL6IP4	chr12	+	123467015	123467455	123467015	123467085	123467166	123467455	4175	90,84,92,136	716,818,550,854	126,109	506,499	180	99	2.1173e-05	0.0014498	0.065,0.053,0.084,0.081	0.12,0.107	-0.043
1902	ENSG00000119650.8	IFT43	chr14	+	76548637	76549035	76548637	76548710	76548959	76549035	1902	11,15,32,27	51,43,136,122	46,36	108,82	348	99	0.00306345	0.048441	0.058,0.09,0.063,0.059	0.108,0.111	-0.042
5085	ENSG00000110330.4	BIRC2	chr11	+	102219328	102221480	102219328	102219495	102220608	102221480	5085	1326,1237,1285,1685	3,9,6,4	1117,1120	1,0	1212	99	0.00137272	0.0279049	0.973,0.918,0.946,0.972	0.989,1.0	-0.042
4516	ENSG00000127445.9	PIN1	chr19	+	9959765	9960358	9959765	9959987	9960208	9960358	4516	1429,1261,714,1125	22,15,14,22	1093,1205	7,5	320	99	5.13026e-05	0.00278619	0.953,0.963,0.94,0.941	0.98,0.987	-0.034
217	ENSG00000188603.12	CLN3	chr16	-	28488599	28488956	28488599	28488680	28488784	28488956	217	410,360,348,456	2,14,8,12	413,349	0,5	203	99	0.00115904	0.0247392	0.99,0.926,0.955,0.949	1.0,0.971	-0.031
4513	ENSG00000178467.13	P4HTM	chr3	+	49042293	49043300	49042293	49042479	49043209	49043300	4513	35,26,42,77	110,89,103,186	64,64	100,97	829	99	0.000590273	0.0157797	0.037,0.034,0.046,0.047	0.071,0.073	-0.031
1119	ENSG00000166526.12	ZNF3	chr7	-	99672757	99673253	99672757	99672884	99673164	99673253	1119	29,21,19,45	185,179,136,202	26,39	101,123	379	99	0.00317758	0.0492147	0.039,0.03,0.035,0.055	0.063,0.076	-0.03
2072	ENSG00000165792.13	METTL17	chr14	+	21462952	21463392	21462952	21463060	21463323	21463392	2072	51,20,23,31	242,216,137,179	56,54	203,195	362	99	0.00112225	0.0246076	0.054,0.025,0.044,0.045	0.07,0.07	-0.028
4605	ENSG00000125912.6	NCLN	chr19	+	3207626	3209573	3207626	3207745	3209475	3209573	4605	3586,3292,2734,3854	0,1,10,19	2789,3000	3,0	1829	99	0.00156747	0.0304369	1.0,0.994,0.937,0.917	0.981,1.0	-0.028
4494	ENSG00000241878.5	PISD	chr22	-	32016981	32017458	32016981	32017128	32017319	32017458	4494	9,12,4,11	164,169,133,193	14,13	100,104	290	99	0.00199989	0.0356418	0.018,0.024,0.01,0.019	0.046,0.041	-0.026
1957	ENSG00000114021.7	NIT2	chr3	+	100064428	100065099	100064428	100064522	100065024	100065099	1957	25,9,45,46	125,133,189,256	64,79	219,238	601	99	0.000284983	0.0103952	0.032,0.011,0.038,0.029	0.046,0.052	-0.022
3495	ENSG00000063660.4	GPC1	chr2	+	241402763	241404163	241402763	241402929	241404032	241404163	3495	7,12,14,14	39,47,41,82	25,32	48,65	1202	99	0.000600806	0.0158442	0.015,0.021,0.027,0.014	0.041,0.039	-0.021
4336	ENSG00000171858.13	RPS21	chr20	+	60963364	60963575	60963364	60963420	60963512	60963575	4336	1469,1378,1342,1945	16703,16039,19532,24644	2262,2376	18860,18206	191	99	5.74031e-07	9.33518e-05	0.044,0.043,0.034,0.039	0.059,0.063	-0.021
2318	ENSG00000234741.3	GAS5	chr1	-	173834366	173834685	173834366	173834420	173834608	173834685	2318	411,280,325,438	2088,1966,2411,3074	447,430	1995,2080	287	99	0.000511152	0.0142502	0.064,0.047,0.044,0.047	0.072,0.067	-0.019
1890	ENSG00000082641.11	NFE2L1	chr17	+	46127968	46128990	46127968	46128181	46128478	46128990	1890	2412,2414,1752,2471	4,2,25,31	1872,1976	7,2	396	99	0.000691081	0.0171802	0.993,0.997,0.946,0.952	0.985,0.996	-0.018
1168	ENSG00000172500.8	FIBP	chr11	-	65652040	65652469	65652040	65652127	65652405	65652469	1168	55,48,45,44	558,652,444,720	58,46	375,393	377	99	0.00138625	0.0280338	0.025,0.019,0.026,0.016	0.039,0.03	-0.013
4649	ENSG00000119185.8	ITGB1BP1	chr2	-	9546789	9547727	9546789	9547034	9547577	9547727	4649	193,178,73,121	678,739,803,1010	165,203	732,716	642	99	0.000949796	0.0218062	0.042,0.036,0.014,0.018	0.034,0.042	-0.011
1344	ENSG00000092199.13	HNRNPC	chr14	-	21677294	21679725	21677294	21679465	21679564	21679725	1344	73,79,55,61	2342,2584,2125,2602	126,118	2758,2936	198	99	0.000510446	0.0142502	0.015,0.015,0.013,0.012	0.022,0.02	-0.007
2469	ENSG00000075415.8	SLC25A3	chr12	+	98987752	98989626	98987752	98987913	98989504	98989626	2469	523,453,629,746	2227,1898,2517,3488	474,474	2942,3516	1690	99	0.0010648	0.0237166	0.014,0.014,0.014,0.012	0.009,0.008	0.005
253	ENSG00000198755.6	RPL10A	chr6	+	35436196	35436650	35436196	35436216	35436575	35436650	253	385,342,513,683	4281,3918,4155,6252	307,387	4471,5093	458	99	0.000563533	0.01541	0.019,0.019,0.026,0.023	0.015,0.016	0.006
3522	ENSG00000147140.11	NONO	chrX	+	70517685	70518358	70517685	70517788	70518318	70518358	3522	243,216,244,298	1840,1801,1536,1894	201,227	2063,2156	629	99	0.00193163	0.0347912	0.02,0.019,0.024,0.024	0.015,0.016	0.006
455	ENSG00000169045.13	HNRNPH1	chr5	-	179043869	179044111	179043869	179043959	179044051	179044111	455	104,80,49,65	1931,1845,1391,1826	70,65	2420,2371	191	99	0.00324601	0.0498787	0.027,0.022,0.018,0.018	0.015,0.014	0.007
3595	ENSG00000160201.7	U2AF1	chr21	-	44520562	44524512	44520562	44520629	44524424	44524512	3595	465,506,515,722	1161,1116,526,624	355,355	828,808	3894	99	2.67103e-05	0.00170902	0.01,0.011,0.024,0.029	0.011,0.011	0.007
4997	ENSG00000105373.14	GLTSCR2	chr19	+	48259012	48259861	48259012	48259079	48259784	48259861	4997	215,183,167,179	1059,1058,1317,1902	124,144	1442,1433	804	99	0.000210327	0.00812777	0.024,0.021,0.015,0.011	0.01,0.012	0.007
2454	ENSG00000178035.7	IMPDH2	chr3	-	49065863	49066239	49065863	49065965	49066190	49066239	2454	17,26,35,78	779,689,686,914	25,33	1240,1228	324	99	0.00254726	0.0428532	0.007,0.011,0.015,0.025	0.006,0.008	0.008
3364	ENSG00000205581.6	HMGN1	chr21	-	40717071	40720265	40717071	40717200	40720217	40720265	3364	904,741,1063,1451	1762,1641,1399,1788	796,749	1951,2117	3116	99	3.16294e-07	6.17248e-05	0.016,0.014,0.024,0.025	0.013,0.011	0.008
453	ENSG00000169045.13	HNRNPH1	chr5	-	179043126	179044111	179043126	179043219	179043869	179044111	453	245,293,156,237	1303,1270,971,1264	195,179	1468,1672	749	99	1.45713e-05	0.00117334	0.024,0.03,0.021,0.024	0.017,0.014	0.009
458	ENSG00000169045.13	HNRNPH1	chr5	-	179047892	179048398	179047892	179048036	179048242	179048398	458	200,167,110,157	2091,1957,1575,1896	145,143	2530,2695	305	99	0.000274896	0.0101219	0.03,0.027,0.022,0.026	0.018,0.017	0.009
1674	ENSG00000108039.13	XPNPEP1	chr10	-	111635285	111637625	111635285	111635357	111637547	111637625	1674	143,136,118,178	250,265,317,368	74,79	255,333	2289	99	6.00586e-06	0.000571729	0.024,0.022,0.016,0.02	0.012,0.01	0.01
2897	ENSG00000146263.7	MMS22L	chr6	-	97711210	97715878	97711210	97711324	97715747	97715878	2897	47,44,52,45	54,51,46,45	37,44	77,81	4522	99	0.00119731	0.0253973	0.019,0.019,0.024,0.021	0.01,0.012	0.01
4267	ENSG00000115053.11	NCL	chr2	-	232322976	232323836	232322976	232323100	232323711	232323836	4267	331,313,344,438	5124,4773,1697,2074	299,383	6100,6335	710	99	4.61193e-07	8.18199e-05	0.009,0.009,0.027,0.029	0.007,0.008	0.011
2452	ENSG00000178035.7	IMPDH2	chr3	-	49061927	49062235	49061927	49062011	49062091	49062235	2452	39,43,36,50	742,660,699,1051	38,40	1197,1236	179	99	0.00183186	0.0338514	0.028,0.035,0.028,0.026	0.017,0.018	0.012
3122	ENSG00000095787.17	WAC	chr10	+	28903495	28905291	28903495	28903614	28905101	28905291	3122	126,93,151,225	213,249,293,372	79,70	227,241	1586	99	0.000299319	0.0106204	0.036,0.023,0.031,0.036	0.021,0.018	0.012
3730	ENSG00000047410.9	TPR	chr1	-	186310383	186312605	186310383	186310521	186312457	186312605	3730	76,104,119,159	254,292,225,253	63,77	384,381	2035	99	4.43943e-10	3.46542e-07	0.014,0.017,0.025,0.03	0.008,0.01	0.012
90	ENSG00000203965.8	EFCAB7	chr1	+	64033980	64036799	64033980	64034190	64036691	64036799	90	20,11,45,43	61,59,43,55	12,12	57,60	2600	99	0.000384465	0.0119093	0.012,0.007,0.038,0.029	0.008,0.008	0.013
273	ENSG00000042317.12	SPATA7	chr14	+	88893973	88895807	88893973	88894040	88895691	88895807	273	18,21,25,38	42,44,44,69	32,24	109,106	1750	99	0.00193735	0.0347912	0.024,0.026,0.031,0.03	0.016,0.013	0.013
3145	ENSG00000162909.13	CAPN2	chr1	+	223957542	223958227	223957542	223957611	223958148	223958227	3145	24,18,36,60	228,185,236,344	14,13	294,281	636	99	6.52275e-06	0.000600461	0.016,0.015,0.023,0.026	0.007,0.007	0.013
1115	ENSG00000224078.8	SNHG14	chr15	+	25349005	25351441	25349005	25349117	25351310	25351441	1115	80,84,80,143	106,117,89,134	45,61	96,109	2292	99	0.00147885	0.0291513	0.032,0.03,0.037,0.044	0.02,0.024	0.014
1580	ENSG00000119723.11	COQ6	chr14	+	74426117	74428078	74426117	74426225	74427875	74428078	1580	33,16,23,32	40,73,57,74	11,17	66,68	1749	99	0.00306557	0.048441	0.045,0.012,0.022,0.024	0.009,0.014	0.014
3758	ENSG00000157538.9	DSCR3	chr21	-	38595720	38600107	38595720	38597927	38599954	38600107	3758	40,68,32,56	98,109,55,72	22,31	94,97	2126	99	0.000110669	0.00491749	0.019,0.028,0.026,0.035	0.011,0.015	0.014
2187	ENSG00000221914.4	PPP2R2A	chr8	+	26220199	26221406	26220199	26220364	26221236	26221406	2187	59,38,61,94	137,153,196,261	43,36	209,236	971	99	9.99454e-05	0.00464389	0.042,0.025,0.031,0.035	0.021,0.015	0.015
2489	ENSG00000173145.7	NOC3L	chr10	-	96116930	96117972	96116930	96117088	96117839	96117972	2489	26,29,40,61	129,143,169,222	13,19	167,167	850	99	1.9002e-05	0.00137342	0.023,0.023,0.027,0.031	0.009,0.013	0.015
2927	ENSG00000111300.5	NAA25	chr12	-	112477032	112478382	112477032	112477143	112478284	112478382	2927	111,110,110,129	253,237,203,238	70,63	216,219	1240	99	0.000680068	0.0171045	0.034,0.036,0.041,0.041	0.025,0.022	0.015
3708	ENSG00000052749.9	RRP12	chr10	-	99130679	99131923	99130679	99130838	99131829	99131923	3708	30,20,29,75	81,67,125,150	12,14	74,84	1090	99	0.000631658	0.0164358	0.033,0.026,0.021,0.043	0.015,0.015	0.016
1736	ENSG00000198563.9	DDX39B	chr6	-	31500556	31503262	31500556	31500688	31503143	31503262	1736	1138,1088,1008,1551	790,865,832,1133	864,865	1008,1058	2554	99	2.12613e-06	0.000276609	0.053,0.046,0.045,0.05	0.032,0.031	0.017
596	ENSG00000005700.10	IBTK	chr6	-	82900789	82901596	82900789	82900933	82901503	82901596	596	50,54,30,41	182,210,113,178	31,22	202,203	669	99	0.000261376	0.00971574	0.039,0.037,0.038,0.033	0.022,0.016	0.018
2282	ENSG00000115548.12	KDM3A	chr2	+	86716642	86718180	86716642	86716782	86718003	86718180	2282	13,27,15,39	26,48,59,97	8,6	41,42	1320	99	0.00184064	0.0338514	0.036,0.04,0.019,0.029	0.014,0.011	0.018
3036	ENSG00000112739.12	PRPF4B	chr6	+	4056554	4057421	4056554	4056669	4057269	4057421	3036	28,45,49,70	124,154,142,155	25,48	188,189	699	99	0.0018285	0.0338514	0.031,0.04,0.047,0.06	0.018,0.035	0.018
3528	ENSG00000089916.13	GPATCH2L	chr14	+	76639888	76643033	76639888	76639968	76642965	76643033	3528	142,146,151,204	97,118,83,128	68,61	68,71	3096	99	0.00214514	0.0374658	0.045,0.038,0.055,0.048	0.031,0.027	0.018
4949	ENSG00000065000.11	AP3D1	chr19	-	2109084	2109957	2109084	2109206	2109871	2109957	4949	60,46,83,84	281,249,148,194	50,58	249,293	764	99	0.00235515	0.0403165	0.027,0.023,0.068,0.053	0.025,0.025	0.018
888	ENSG00000162191.9	UBXN1	chr11	-	62446161	62446530	62446161	62446215	62446336	62446530	888	16,13,8,17	157,189,148,275	6,7	245,239	220	99	0.00115221	0.0247392	0.044,0.03,0.024,0.027	0.011,0.013	0.019
4558	ENSG00000145495.10	MARCH6	chr5	+	10400895	10402251	10400895	10400954	10402170	10402251	4558	136,154,366,511	247,193,495,633	122,173	309,342	1315	99	5.47554e-05	0.00292754	0.04,0.057,0.053,0.057	0.029,0.037	0.019
1314	ENSG00000127980.11	PEX1	chr7	-	92122266	92123710	92122266	92122443	92123606	92123710	1314	18,13,15,44	44,32,41,72	8,11	46,53	1262	99	0.000970445	0.02215	0.031,0.031,0.028,0.046	0.013,0.016	0.02
5191	ENSG00000005955.8	GGNBP2	chr17	+	34934412	34935849	34934412	34934616	34935674	34935849	5191	51,58,73,96	115,118,109,141	43,26	105,117	1157	99	0.000439261	0.0129882	0.037,0.04,0.054,0.055	0.034,0.019	0.02
2712	ENSG00000154743.13	TSEN2	chr3	+	12571260	12573158	12571260	12571372	12573068	12573158	2712	67,51,86,89	85,68,98,109	37,36	86,91	1795	99	0.000132328	0.00557343	0.042,0.04,0.046,0.043	0.023,0.021	0.021
2951	ENSG00000141279.11	NPEPPS	chr17	+	45656755	45660215	45656755	45656877	45660107	45660215	2951	15,28,43,49	24,17,34,42	15,28	45,55	3329	99	2.84262e-05	0.00173355	0.018,0.047,0.036,0.034	0.01,0.015	0.021
2230	ENSG00000111364.11	DDX55	chr12	+	124091978	124093376	124091978	124092209	124093226	124093376	2230	71,78,67,141	130,115,113,144	65,67	163,150	1116	99	0.000819146	0.0195206	0.046,0.057,0.05,0.08	0.034,0.038	0.022
5074	ENSG00000166986.8	MARS	chr12	+	57910027	57910438	57910027	57910120	57910217	57910438	5074	92,100,127,147	1048,1037,1120,1567	33,62	871,1022	196	99	1.47733e-06	0.000213556	0.042,0.046,0.054,0.045	0.019,0.03	0.022
2799	ENSG00000104731.9	KLHDC4	chr16	-	87788799	87790083	87788799	87788898	87790004	87790083	2799	39,39,28,38	51,61,71,87	23,12	69,72	1205	99	0.000478078	0.0137201	0.059,0.05,0.031,0.035	0.027,0.014	0.023
3664	ENSG00000176986.10	SEC24C	chr10	+	75530037	75530556	75530037	75530229	75530466	75530556	3664	18,15,27,29	139,132,124,215	8,6	94,121	336	99	0.00274793	0.0446559	0.037,0.032,0.06,0.038	0.024,0.014	0.023
4073	ENSG00000149532.11	CPSF7	chr11	-	61187941	61189080	61187941	61188045	61188861	61189080	4073	26,9,21,25	39,47,58,74	11,9	73,52	915	99	0.00174016	0.0328108	0.067,0.02,0.038,0.035	0.016,0.018	0.023
4929	ENSG00000100101.13	NOL12	chr22	+	38087180	38089483	38087180	38087431	38089338	38089483	4929	254,169,128,145	171,163,129,156	139,130	201,238	2006	99	4.71883e-06	0.000472246	0.068,0.049,0.047,0.044	0.033,0.026	0.023
3594	ENSG00000160201.7	U2AF1	chr21	-	44513065	44514673	44513065	44513359	44514580	44514673	3594	205,237,208,236	499,488,272,366	107,84	448,443	1320	99	9.99201e-15	3.89988e-11	0.03,0.035,0.054,0.046	0.018,0.014	0.025
3672	ENSG00000161204.7	ABCF3	chr3	+	183905451	183905771	183905451	183905549	183905648	183905771	3672	18,7,5,8	184,161,124,238	1,0	161,172	198	99	0.000453862	0.0132234	0.047,0.021,0.02,0.017	0.003,0.0	0.025
3800	ENSG00000143379.8	SETDB1	chr1	+	150935449	150936217	150935449	150935615	150936005	150936217	3800	30,37,19,35	122,138,157,180	18,6	157,150	489	99	2.9314e-05	0.00176019	0.047,0.051,0.024,0.038	0.023,0.008	0.025
2567	ENSG00000135596.13	MICAL1	chr6	-	109772802	109773604	109772802	109772903	109773448	109773604	2567	117,123,67,118	226,249,169,216	58,61	226,200	644	99	0.000102168	0.00469129	0.074,0.071,0.057,0.077	0.038,0.045	0.028
466	ENSG00000006015.13	C19orf60	chr19	+	18701663	18703146	18701663	18701743	18702917	18703146	466	198,201,201,283	275,273,268,286	110,119	281,308	1273	99	7.3753e-09	2.87858e-06	0.053,0.054,0.055,0.071	0.03,0.029	0.029
2293	ENSG00000100395.10	L3MBTL2	chr22	+	41613126	41615540	41613126	41613206	41615422	41615540	2293	96,97,81,88	92,97,52,90	40,45	96,113	2315	99	3.87902e-09	1.89248e-06	0.043,0.041,0.062,0.04	0.018,0.017	0.029
845	ENSG00000119707.9	RBM25	chr14	+	73577538	73578510	73577538	73577863	73578235	73578510	845	93,63,74,152	464,316,202,281	46,70	352,352	471	99	1.57533e-05	0.0012297	0.04,0.04,0.071,0.102	0.027,0.04	0.03
177	ENSG00000109118.9	PHF12	chr17	-	27250926	27254081	27250926	27251320	27254008	27254081	177	32,37,48,55	28,36,17,40	14,18	27,26	2787	99	0.000706032	0.0174408	0.039,0.035,0.091,0.047	0.018,0.024	0.032
730	ENSG00000145833.11	DDX46	chr5	+	134152119	134153404	134152119	134152296	134153185	134153404	730	69,61,62,73	150,174,87,93	39,47	212,173	988	99	9.49876e-08	2.64812e-05	0.044,0.034,0.067,0.073	0.018,0.027	0.032
296	ENSG00000170791.13	CHCHD7	chr8	+	57124347	57127226	57124347	57124396	57127156	57127226	296	29,23,24,41	35,26,23,14	25,26	62,68	2859	99	1.74268e-06	0.000234541	0.028,0.03,0.035,0.092	0.014,0.013	0.033
2895	ENSG00000162231.9	NXF1	chr11	-	62566010	62567958	62566010	62566047	62567848	62567958	2895	29,31,59,109	41,83,38,58	24,19	45,59	1900	99	2.60696e-05	0.00169583	0.036,0.019,0.075,0.089	0.027,0.017	0.033
2898	ENSG00000146263.7	MMS22L	chr6	-	97717777	97720757	97717777	97717868	97720579	97720757	2898	46,57,66,70	81,67,20,51	33,44	76,86	2810	99	5.60775e-06	0.000547177	0.02,0.029,0.104,0.046	0.015,0.018	0.033
3158	ENSG00000213930.7	GALT	chr9	+	34647085	34648168	34647085	34647958	34648111	34648168	3158	8,8,7,17	86,66,73,88	5,3	109,114	252	99	0.00034867	0.0112468	0.035,0.045,0.036,0.071	0.018,0.01	0.033
323	ENSG00000126088.8	UROD	chr1	+	45478807	45479026	45478807	45478887	45478963	45479026	323	28,28,5,22	254,209,80,121	12,11	195,230	175	99	0.000595766	0.0158182	0.059,0.07,0.034,0.093	0.034,0.026	0.034
1303	ENSG00000148334.10	PTGES2	chr9	-	130884640	130885413	130884640	130884758	130885212	130885413	1303	271,305,398,583	488,485,369,558	275,331	518,535	553	99	0.00184739	0.0338514	0.09,0.101,0.162,0.158	0.087,0.1	0.034
2140	ENSG00000169727.8	GPS1	chr17	+	80011743	80012686	80011743	80011925	80012373	80012686	2140	26,13,14,23	56,70,34,59	9,12	58,78	547	99	0.00242304	0.04094	0.078,0.033,0.069,0.066	0.027,0.027	0.035
4358	ENSG00000132522.11	GPS2	chr17	-	7217806	7218438	7217806	7217916	7218277	7218438	4358	50,21,27,36	130,126,77,114	17,19	136,154	460	99	2.80772e-05	0.00173355	0.076,0.035,0.07,0.064	0.026,0.026	0.035
4771	ENSG00000158552.8	ZFAND2B	chr2	+	220072977	220073208	220072977	220073070	220073147	220073208	4771	11,15,4,15	110,93,94,126	2,5	108,86	176	99	0.00204846	0.0361772	0.053,0.083,0.023,0.063	0.01,0.032	0.035
1233	ENSG00000103024.3	NME3	chr16	-	1821070	1821411	1821070	1821172	1821280	1821411	1233	32,28,91,119	166,184,269,376	35,30	196,219	207	99	0.00215023	0.0374658	0.084,0.068,0.139,0.131	0.079,0.061	0.036
3972	ENSG00000085978.17	ATG16L1	chr2	+	234181611	234182423	234181611	234181698	234182366	234182423	3972	21,9,20,11	42,38,22,29	15,4	50,55	767	99	0.00129385	0.026708	0.061,0.03,0.105,0.047	0.037,0.009	0.038
4908	ENSG00000101639.14	CEP192	chr18	+	13057583	13059311	13057583	13057732	13059080	13059311	4908	15,17,29,25	24,29,27,21	2,9	43,28	1447	99	1.14543e-07	2.98042e-05	0.041,0.039,0.068,0.075	0.003,0.022	0.043
5221	ENSG00000070814.13	TCOF1	chr5	+	149755283	149755893	149755283	149755472	149755644	149755893	5221	16,12,34,52	125,119,86,153	14,15	141,142	271	99	0.000328149	0.0108812	0.045,0.036,0.126,0.11	0.035,0.037	0.043
992	ENSG00000169592.10	INO80E	chr16	+	30007564	30007938	30007564	30007712	30007867	30007938	992	22,31,28,28	164,170,84,131	7,16	121,144	254	99	0.000356764	0.0113961	0.05,0.066,0.115,0.077	0.022,0.042	0.045
2428	ENSG00000108654.7	DDX5	chr17	-	62496666	62498187	62496666	62496891	62498127	62498187	2428	3053,2870,3122,4103	1513,1438,1717,2261	1612,1790	1414,1524	1335	99	4.68729e-08	1.52454e-05	0.13,0.129,0.119,0.119	0.078,0.08	0.045
1511	ENSG00000161939.14	RNASEK-C17orf49	chr17	+	6917463	6918475	6917463	6918197	6918380	6918475	1511	19,10,4,18	67,45,32,59	4,2	30,50	282	99	0.00103569	0.0232316	0.091,0.072,0.042,0.097	0.045,0.014	0.046
4357	ENSG00000132522.11	GPS2	chr17	-	7216886	7217478	7216886	7217307	7217398	7217478	4357	4,12,9,11	91,94,60,74	2,2	102,85	190	99	6.3946e-05	0.00328396	0.022,0.062,0.072,0.072	0.01,0.012	0.046
3979	ENSG00000131051.16	RBM39	chr20	-	34326889	34328809	34326889	34326939	34328745	34328809	3979	1239,1220,1277,1701	452,482,311,392	937,996	418,455	1905	99	5.13978e-05	0.00278619	0.125,0.116,0.176,0.184	0.104,0.102	0.047
947	ENSG00000127054.14	CPSF3L	chr1	-	1248414	1248972	1248414	1248504	1248888	1248972	947	153,204,142,222	173,216,269,374	122,124	290,284	483	99	5.61286e-05	0.00296041	0.153,0.162,0.098,0.108	0.079,0.082	0.05
3148	ENSG00000213930.7	GALT	chr9	+	34647085	34647564	34647085	34647255	34647488	34647564	3148	28,26,44,41	79,69,63,74	29,28	104,108	332	99	0.00286456	0.0458212	0.096,0.101,0.172,0.142	0.077,0.072	0.053
1775	ENSG00000125447.12	GGA3	chr17	-	73235869	73237138	73235869	73236189	73236422	73237138	1775	6,10,2,10	33,31,17,28	2,0	23,21	332	99	0.000575134	0.0154885	0.051,0.088,0.034,0.096	0.025,0.0	0.055
942	ENSG00000127054.14	CPSF3L	chr1	-	1247605	1247881	1247605	1247748	1247819	1247881	942	34,44,22,43	157,129,172,301	15,26	214,231	170	99	0.000234276	0.00887748	0.112,0.166,0.069,0.077	0.039,0.062	0.056
1615	ENSG00000163516.9	ANKZF1	chr2	+	220098854	220100034	220098854	220099010	220099547	220100034	1615	110,94,53,77	65,79,71,101	95,73	126,175	636	99	8.40982e-05	0.00410294	0.209,0.156,0.104,0.106	0.105,0.061	0.061
5224	ENSG00000105607.8	GCDH	chr19	+	13002300	13002788	13002300	13002336	13002644	13002788	5224	24,19,8,27	30,50,43,47	17,8	64,86	407	99	0.000144931	0.00589236	0.163,0.085,0.043,0.123	0.061,0.022	0.062
522	ENSG00000010270.9	STARD3NL	chr7	+	38254628	38256906	38254628	38254706	38256788	38256906	522	47,41,46,76	34,60,11,18	42,41	48,49	2181	99	0.00102854	0.0232046	0.059,0.03,0.16,0.161	0.038,0.037	0.065
2970	ENSG00000213024.6	NUP62	chr19	-	50430950	50432761	50430950	50431072	50432582	50432761	2970	87,91,247,363	73,82,61,97	48,59	53,49	1609	99	0.000121677	0.00527671	0.068,0.064,0.199,0.187	0.053,0.069	0.069
3404	ENSG00000117335.14	CD46	chr1	+	207940357	207943707	207940357	207940540	207943665	207943707	3404	420,297,659,801	165,155,85,115	466,540	264,262	3224	99	1.61488e-07	3.68022e-05	0.072,0.056,0.192,0.176	0.051,0.06	0.069
3345	ENSG00000180098.5	TRNAU1AP	chr1	+	28887144	28887910	28887144	28887244	28887857	28887910	3345	23,27,10,25	33,36,15,20	15,12	45,80	712	99	5.1301e-07	8.70555e-05	0.088,0.094,0.085,0.148	0.044,0.02	0.072
4672	ENSG00000116691.6	MIIP	chr1	+	12089279	12090181	12089279	12089951	12090084	12090181	4672	10,4,2,8	35,49,14,19	3,0	39,60	232	99	9.60546e-05	0.00462841	0.109,0.034,0.057,0.152	0.032,0.0	0.072
352	ENSG00000260669.2	AL136419.6	chr14	-	24684757	24685003	24684757	24684868	24684942	24685003	352	81,58,60,110	131,130,124,158	42,57	127,155	173	99	0.00298273	0.0475167	0.261,0.203,0.217,0.285	0.159,0.174	0.075
2087	ENSG00000124222.17	STX16	chr20	+	57226327	57227143	57226327	57226470	57227128	57227143	2087	832,896,432,639	2,0,1,0	441,475	8,3	757	99	1.47307e-05	0.00117334	0.982,1.0,0.983,1.0	0.878,0.954	0.075
4427	ENSG00000213780.6	GTF2H4	chr6	+	30880886	30881164	30880886	30880934	30881085	30881164	4427	22,25,26,18	84,90,42,81	11,11	95,106	250	99	4.49613e-05	0.00258065	0.094,0.099,0.197,0.081	0.044,0.039	0.076
2855	ENSG00000119760.11	SUPT7L	chr2	-	27883850	27885148	27883850	27884255	27885045	27885148	2855	224,238,269,313	66,97,90,145	206,185	126,110	889	99	0.000421293	0.0126485	0.274,0.215,0.25,0.194	0.154,0.158	0.077
13	ENSG00000170889.9	RPS9	chr19	+	54710420	54711515	54710420	54710592	54711265	54711515	13	335,300,333,479	174,116,157,211	326,423	267,319	772	99	1.40537e-06	0.000210968	0.198,0.249,0.214,0.225	0.135,0.145	0.081
1372	ENSG00000183010.12	PYCR1	chr17	-	79894623	79895133	79894623	79894737	79895103	79895133	1372	157,140,249,369	0,0,1,2	193,250	3,7	465	99	7.30436e-05	0.00365516	1.0,1.0,0.981,0.975	0.932,0.884	0.081
954	ENSG00000164068.11	RNF123	chr3	+	49742082	49742619	49742082	49742189	49742416	49742619	954	5,13,8,2	21,23,12,34	1,1	20,22	326	99	0.000248481	0.00932522	0.067,0.146,0.168,0.018	0.015,0.014	0.085
3647	ENSG00000105204.9	DYRK1B	chr19	-	40317311	40317627	40317311	40317507	40317591	40317627	3647	17,17,13,13	0,0,0,2	27,43	3,3	183	99	0.00192488	0.0347912	1.0,1.0,1.0,0.779	0.83,0.886	0.087
3698	ENSG00000128159.7	TUBGCP6	chr22	-	50657716	50658220	50657716	50657885	50658072	50658220	3698	18,9,5,15	37,19,32,36	8,0	48,41	286	99	5.79293e-05	0.00301464	0.144,0.141,0.051,0.126	0.055,0.0	0.088
3875	ENSG00000180891.8	CUEDC1	chr17	-	55943834	55944776	55943834	55943905	55944717	55944776	3875	61,45,36,37	18,25,30,22	25,45	39,39	911	99	0.00179234	0.0336322	0.269,0.164,0.115,0.155	0.065,0.111	0.088
256	ENSG00000198755.6	RPL10A	chr6	+	35436723	35437306	35436723	35437062	35437157	35437306	256	264,255,261,444	57,53,63,96	362,353	110,124	194	99	0.00271788	0.0443845	0.703,0.711,0.679,0.702	0.627,0.592	0.089
3538	ENSG00000076108.7	BAZ2A	chr12	-	56998368	56999111	56998368	56998583	56998856	56999111	3538	8,19,23,22	29,25,46,98	0,6	39,58	372	99	4.08609e-07	7.59429e-05	0.068,0.168,0.117,0.056	0.0,0.027	0.089
1727	ENSG00000105426.10	PTPRS	chr19	-	5218430	5219478	5218430	5218543	5219320	5219478	1727	31,27,47,84	23,17,34,35	14,15	19,28	876	99	0.000111891	0.00491749	0.132,0.152,0.135,0.213	0.077,0.057	0.091
4114	ENSG00000128596.12	CCDC136	chr7	+	128446290	128446912	128446290	128446449	128446741	128446912	4114	41,41,71,83	37,34,52,69	31,53	54,69	391	99	0.00194324	0.0347912	0.219,0.234,0.257,0.233	0.127,0.163	0.091
2549	ENSG00000178149.12	DALRD3	chr3	-	49053251	49053519	49053251	49053305	49053405	49053519	2549	286,292,262,281	54,46,57,63	254,294	80,84	199	99	0.00320953	0.0495131	0.725,0.759,0.696,0.689	0.612,0.635	0.094
4871	ENSG00000105655.14	ISYNA1	chr19	-	18547139	18547915	18547139	18547289	18547782	18547915	4871	129,107,105,181	0,0,0,0	203,199	4,3	592	99	0.000482082	0.0137341	1.0,1.0,1.0,1.0	0.895,0.917	0.094
488	ENSG00000087303.12	NID2	chr14	-	52472454	52473378	52472454	52472567	52473254	52473378	488	56,65,43,35	154,169,15,19	55,33	137,137	786	99	0.000141723	0.00582259	0.044,0.046,0.265,0.188	0.048,0.029	0.097
1742	ENSG00000087274.12	ADD1	chr4	+	2910241	2911158	2910241	2910331	2911065	2911158	1742	25,20,16,26	16,14,10,11	9,12	15,18	833	99	0.00240645	0.04094	0.157,0.145,0.16,0.219	0.067,0.073	0.1
4508	ENSG00000099622.9	CIRBP	chr19	+	1271979	1274439	1271979	1272050	1274305	1274439	4508	5569,5380,5634,7284	22,29,9,8	5738,6179	35,68	2354	99	3.01413e-09	1.68059e-06	0.914,0.886,0.963,0.975	0.873,0.793	0.102
143	ENSG00000175832.8	ETV4	chr17	-	41622641	41623036	41622641	41622735	41622925	41623036	143	27,36,66,87	70,41,87,106	7,14	29,41	289	99	0.000859641	0.0200909	0.117,0.231,0.206,0.219	0.076,0.105	0.103
729	ENSG00000145833.11	DDX46	chr5	+	134152119	134153404	134152119	134152293	134153185	134153404	729	70,63,62,76	51,66,17,23	41,48	64,45	991	99	0.000291216	0.0105242	0.121,0.087,0.267,0.248	0.06,0.096	0.103
912	ENSG00000138750.10	NUP54	chr4	-	77038816	77039347	77038816	77038895	77039227	77039347	912	142,124,81,141	1,3,1,1	138,129	9,3	431	99	0.00125738	0.0263847	0.97,0.905,0.949,0.97	0.779,0.908	0.105
1826	ENSG00000154222.10	CC2D1B	chr1	-	52823452	52824133	52823452	52823570	52824002	52824133	1826	25,12,13,14	15,19,8,10	10,9	22,20	531	99	0.00312658	0.0490082	0.237,0.105,0.233,0.207	0.078,0.077	0.118
1054	ENSG00000187535.9	IFT140	chr16	-	1575887	1576797	1575887	1576078	1576733	1576797	1054	16,22,12,23	1,0,0,1	44,33	0,5	754	99	0.0026409	0.0436756	0.678,1.0,1.0,0.751	1.0,0.464	0.125
3439	ENSG00000214140.6	PRCD	chr17	+	74539884	74540452	74539884	74540014	74540313	74540452	3439	84,69,95,109	0,0,0,0	65,116	3,3	398	99	0.00114175	0.0247392	1.0,1.0,1.0,1.0	0.843,0.906	0.125
3115	ENSG00000089820.11	ARHGAP4	chrX	-	153175624	153176065	153175624	153175858	153175959	153176065	3115	18,22,16,17	28,39,19,33	13,10	39,54	200	99	0.00106947	0.0237166	0.241,0.218,0.294,0.203	0.142,0.084	0.126
3056	ENSG00000123154.7	WDR83	chr19	+	12780568	12780894	12780568	12780707	12780790	12780894	3056	26,24,14,22	52,39,25,36	7,10	40,38	182	99	0.00079941	0.0193114	0.214,0.251,0.233,0.249	0.087,0.125	0.131
584	ENSG00000177380.9	PPFIA3	chr19	+	49653336	49654278	49653336	49653408	49653492	49654278	584	51,37,81,81	81,62,81,116	21,26	86,65	183	99	2.4788e-05	0.00163979	0.254,0.244,0.351,0.274	0.117,0.178	0.133
4590	ENSG00000108465.10	CDK5RAP3	chr17	+	46048487	46048773	46048487	46048537	46048727	46048773	4590	55,50,22,27	0,0,0,0	40,32	5,0	289	99	0.00314299	0.0490459	1.0,1.0,1.0,1.0	0.733,1.0	0.133
1047	ENSG00000197989.9	SNHG12	chr1	-	28906044	28907158	28906044	28906493	28907071	28907158	1047	249,244,145,207	67,42,34,53	196,179	77,84	677	99	8.09533e-05	0.0039995	0.352,0.459,0.384,0.364	0.271,0.238	0.135
3569	ENSG00000162576.12	MXRA8	chr1	-	1289572	1289889	1289572	1289612	1289733	1289889	3569	9,5,8,17	45,39,17,13	2,2	30,23	220	99	0.000649148	0.0166686	0.083,0.055,0.175,0.37	0.029,0.038	0.137
2079	ENSG00000134222.12	PSRC1	chr1	-	109823398	109823873	109823398	109823668	109823758	109823873	2079	33,17,8,18	28,29,10,24	20,16	53,50	189	99	0.00147491	0.0291513	0.382,0.235,0.295,0.282	0.165,0.144	0.144
4596	ENSG00000108465.10	CDK5RAP3	chr17	+	46052879	46053379	46052879	46053004	46053234	46053379	4596	149,122,107,140	0,6,0,14	127,131	14,12	329	99	0.00142481	0.0286651	1.0,0.86,1.0,0.751	0.732,0.767	0.153
2835	ENSG00000140365.11	COMMD4	chr15	+	75631325	75632219	75631325	75631445	75632042	75632219	2835	48,49,41,27	2,0,0,0	48,79	2,3	696	99	0.000835286	0.0197583	0.773,1.0,1.0,1.0	0.773,0.789	0.162
817	ENSG00000135452.5	TSPAN31	chr12	+	58139958	58140503	58139958	58140039	58140371	58140503	817	48,41,82,163	29,36,92,94	27,21	74,77	431	99	4.27769e-12	5.56527e-09	0.275,0.207,0.17,0.285	0.077,0.059	0.166
2971	ENSG00000213024.6	NUP62	chr19	-	50430950	50432761	50430950	50431105	50432582	50432761	2971	80,89,243,358	21,23,26,23	40,44	16,16	1576	99	0.00159706	0.030706	0.193,0.196,0.37,0.494	0.136,0.147	0.172
612	ENSG00000156873.11	PHKG2	chr16	+	30762426	30762924	30762426	30762538	30762869	30762924	612	65,58,47,72	2,0,0,2	38,72	3,5	430	99	0.000393449	0.0119971	0.882,1.0,1.0,0.892	0.745,0.768	0.187
1518	ENSG00000015479.13	MATR3	chr5	+	138650363	138651877	138650363	138650425	138651764	138651877	1518	201,196,279,356	23,34,33,37	204,235	75,76	1438	99	7.5547e-10	4.91433e-07	0.376,0.284,0.368,0.398	0.158,0.176	0.19
3262	ENSG00000162004.12	CCDC78	chr16	-	775077	775293	775077	775145	775236	775293	3262	22,21,36,34	24,11,19,39	13,20	37,29	190	99	0.00275738	0.0446559	0.323,0.499,0.497,0.312	0.155,0.264	0.198
5211	ENSG00000159899.10	NPR2	chr9	+	35808505	35808850	35808505	35808680	35808751	35808850	5211	4,1,6,1	4,11,6,5	1,0	15,20	170	99	0.000185686	0.00724731	0.368,0.05,0.368,0.104	0.037,0.0	0.204
1514	ENSG00000173821.15	RNF213	chr17	+	78362411	78363167	78362411	78362489	78362972	78363167	1514	12,15,27,54	11,5,7,12	16,15	22,17	582	99	0.000312902	0.0108037	0.157,0.338,0.396,0.434	0.11,0.131	0.211
1864	ENSG00000140474.8	ULK3	chr15	-	75134620	75135017	75134620	75134761	75134875	75135017	1864	29,26,7,21	29,18,9,8	6,13	19,25	213	99	0.00156461	0.0304369	0.317,0.402,0.266,0.55	0.128,0.195	0.222
1513	ENSG00000173821.15	RNF213	chr17	+	78355346	78356870	78355346	78355527	78356778	78356870	1513	45,35,39,82	6,9,6,8	41,27	28,15	1350	99	2.44644e-06	0.000298389	0.355,0.222,0.323,0.429	0.097,0.117	0.225
4785	ENSG00000161960.10	EIF4A1	chr17	+	7477577	7477996	7477577	7477626	7477839	7477996	4785	48,45,36,46	0,0,0,0	14,34	1,4	312	99	0.000322882	0.0108639	1.0,1.0,1.0,1.0	0.816,0.73	0.227
625	ENSG00000125089.12	SH3TC1	chr4	+	8237159	8239397	8237159	8237282	8239200	8239397	625	75,76,45,62	1,0,0,0	33,73	0,5	2017	99	0.000661893	0.016803	0.786,1.0,1.0,1.0	1.0,0.417	0.238
3216	ENSG00000109065.7	NAT9	chr17	-	72768098	72768416	72768098	72768116	72768356	72768416	3216	125,104,154,189	7,20,9,10	78,122	26,22	339	99	0.000391907	0.0119971	0.839,0.603,0.833,0.847	0.467,0.618	0.238
2029	ENSG00000197070.9	ARRDC1	chr9	+	140507347	140507962	140507347	140507458	140507864	140507962	2029	25,43,92,107	1,0,1,2	27,35	3,3	505	99	0.000298729	0.0106204	0.831,1.0,0.947,0.913	0.638,0.696	0.256
1734	ENSG00000100225.13	FBXO7	chr22	+	32883731	32889268	32883731	32883815	32889091	32889268	1734	179,170,187,231	0,1,2,0	139,163	2,2	5375	99	0.00145632	0.0291487	1.0,0.758,0.633,1.0	0.561,0.6	0.267
3490	ENSG00000197363.5	ZNF517	chr8	+	146028254	146029623	146028254	146028332	146029509	146029623	3490	12,10,11,6	2,0,0,0	3,7	0,4	1276	99	0.00256699	0.0429998	0.318,1.0,1.0,1.0	1.0,0.12	0.269
1479	ENSG00000215883.5	CYB5RL	chr1	-	54649833	54651959	54649833	54649938	54651853	54651959	1479	10,15,13,12	1,0,0,0	16,14	0,5	2014	99	0.00185949	0.033914	0.33,1.0,1.0,1.0	1.0,0.121	0.272
283	ENSG00000131697.13	NPHP4	chr1	-	5924397	5926518	5924397	5924577	5926432	5926518	283	30,27,35,42	1,0,0,0	33,33	5,0	1954	99	0.00130016	0.026708	0.603,1.0,1.0,1.0	0.251,1.0	0.275
3358	ENSG00000147535.12	PPAPDC1B	chr8	-	38125414	38126508	38125414	38125478	38126399	38126508	3358	162,130,92,104	2,6,0,2	93,88	6,8	1020	99	0.00115995	0.0247392	0.887,0.678,1.0,0.835	0.601,0.516	0.291
387	ENSG00000072310.12	SREBF1	chr17	-	17720861	17721230	17720861	17720905	17721009	17721230	387	18,9,6,8	0,1,0,0	5,9	1,3	203	99	0.000309008	0.0107684	1.0,0.814,1.0,1.0	0.709,0.594	0.302
4113	ENSG00000143630.5	HCN3	chr1	+	155253764	155254548	155253764	155253926	155254329	155254548	4113	21,31,14,10	1,1,0,0	19,21	3,2	502	99	7.3047e-05	0.00365516	0.806,0.859,1.0,1.0	0.555,0.674	0.302
2032	ENSG00000197070.9	ARRDC1	chr9	+	140508066	140508666	140508066	140508221	140508483	140508666	2032	25,9,49,62	6,6,13,15	8,9	9,18	361	99	8.04088e-06	0.000697412	0.533,0.291,0.508,0.531	0.196,0.121	0.307
709	ENSG00000139133.2	ALG10	chr12	+	34175407	34177094	34175407	34175679	34176896	34177094	709	23,36,42,37	1,1,0,1	15,20	3,1	1316	99	0.000318967	0.0108254	0.634,0.73,1.0,0.736	0.273,0.601	0.338
45	ENSG00000154889.12	MPPE1	chr18	-	11885674	11887024	11885674	11885815	11886915	11887024	45	5,6,10,14	1,0,0,1	11,4	1,1	1199	99	0.000307334	0.0107684	0.292,1.0,1.0,0.536	0.476,0.248	0.345
2659	ENSG00000140553.12	UNC45A	chr15	+	91479175	91479690	91479175	91479212	91479366	91479690	2659	1,11,8,6	1,0,2,1	2,4	4,2	253	99	0.00280274	0.0450169	0.281,1.0,0.61,0.701	0.164,0.439	0.347
375	ENSG00000140650.7	PMM2	chr16	+	8895937	8896246	8895937	8896002	8896117	8896246	375	2,11,12,14	0,0,0,2	3,6	1,2	214	99	0.000366909	0.0114564	1.0,1.0,1.0,0.764	0.581,0.581	0.36
1354	ENSG00000106327.8	TFR2	chr7	-	100224886	100225284	100224886	100225114	100225199	100225284	1354	16,1,3,2	2,4,2,2	0,1	4,4	184	99	0.00016495	0.00656938	0.811,0.119,0.447,0.35	0.0,0.119	0.372
4939	ENSG00000100299.13	ARSA	chr22	-	51065018	51065834	51065018	51065188	51065593	51065834	4939	26,32,29,29	0,0,0,0	21,15	4,1	504	99	2.07439e-05	0.00144577	1.0,1.0,1.0,1.0	0.508,0.747	0.373
3932	ENSG00000158793.9	NIT1	chr1	+	161088923	161089402	161088923	161089178	161089282	161089402	3932	9,6,5,12	0,0,0,2	4,7	2,2	203	99	0.000462541	0.0133726	1.0,1.0,1.0,0.745	0.494,0.631	0.374
4402	ENSG00000203896.5	LIME1	chr20	+	62369173	62369413	62369173	62369255	62369360	62369413	4402	6,4,16,9	4,0,1,0	7,10	5,5	204	99	0.00259459	0.0432765	0.421,1.0,0.886,1.0	0.405,0.493	0.378
641	ENSG00000161996.13	WDR90	chr16	+	703745	705147	703745	703803	705028	705147	641	98,89,78,82	1,6,1,7	98,88	17,20	1324	99	9.79656e-05	0.00464389	0.88,0.526,0.854,0.467	0.301,0.248	0.407
1033	ENSG00000149091.11	DGKZ	chr11	+	46400752	46401118	46400752	46400786	46401003	46401118	1033	5,5,1,9	0,0,0,0	4,12	3,1	316	99	0.000359138	0.0113961	1.0,1.0,1.0,1.0	0.295,0.79	0.458
4434	ENSG00000205726.9	ITSN1	chr21	+	35201309	35202049	35201309	35201354	35201927	35202049	4434	2,10,9,10	2,0,1,3	0,2	3,3	672	99	0.000334216	0.0108812	0.128,1.0,0.57,0.329	0.0,0.089	0.462
1592	ENSG00000130653.11	PNPLA7	chr9	-	140358577	140358908	140358577	140358647	140358791	140358908	1592	2,1,2,2	0,1,2,2	0,0	3,2	243	99	0.00181984	0.0338514	1.0,0.289,0.289,0.289	0.0,0.0	0.467
3552	ENSG00000164076.12	CAMKV	chr3	-	49899477	49899835	49899477	49899609	49899706	49899835	3552	4,6,10,18	1,1,5,4	1,6	6,8	196	99	0.000315557	0.0108037	0.669,0.752,0.503,0.694	0.078,0.275	0.478
315	ENSG00000172803.13	SNX32	chr11	+	65617390	65618025	65617390	65617742	65617901	65618025	315	2,2,1,0	0,0,0,1	2,1	2,2	258	99	1.8416e-05	0.00137342	1.0,1.0,1.0,0.0	0.277,0.161	0.531
318	ENSG00000102904.10	TSNAXIP1	chr16	+	67861375	67861967	67861375	67861482	67861655	67861967	318	6,5,3,2	0,0,0,1	4,3	3,6	272	99	2.44099e-08	8.66108e-06	1.0,1.0,1.0,0.421	0.327,0.154	0.615
2875	ENSG00000111077.13	TENC1	chr12	+	53456403	53457041	53456403	53456481	53456872	53457041	2875	3,3,3,7	1,2,0,0	0,0	2,5	490	99	7.42279e-07	0.000115885	0.377,0.233,1.0,1.0	0.0,0.0	0.652

## Sheet: BE2C SE
id	geneid	genesymbol	chr	strand	exonstart_0base	exonend	upstreames	upstreamee	downstreames	downstreamee	v12	ijc_sample_1	sjc_sample_1	ijc_sample_2	sjc_sample_2	incformlen	skipformlen	pvalue	fdr	inclevel1	inclevel2	incleveldifference
54040	ENSG00000105193.4	RPS16	chr19	-	39924157	39924209	39923899	39924058	39926246	39926345	54040	0,2,0,0	3,6,1,1	2,1	0,0	151	99	5.12923e-13	1.57823e-09	0.0,0.179,0.0,0.0	1.0,1.0	-0.955
7778	ENSG00000197555.5	SIPA1L1	chr14	+	71970544	71970663	71884846	71884913	71979459	71979562	7778	0,2,0,2	7,6,4,10	2,1	0,0	218	99	3.61302e-08	2.01889e-05	0.0,0.131,0.0,0.083	1.0,1.0	-0.947
21006	ENSG00000106714.13	CNTNAP3	chr9	-	39149802	39149974	39140515	39140635	39165929	39166073	21006	3,3,0,0	10,7,1,2	9,2	0,0	271	99	4.62489e-11	6.48609e-08	0.099,0.135,0.0,0.0	1.0,1.0	-0.942
73419	ENSG00000243927.1	MRPS6	chr21	+	35475133	35475207	35445523	35445568	35497640	35497780	73419	2,0,0,0	3,5,4,9	1,1	0,0	173	99	3.6491e-10	3.72854e-07	0.276,0.0,0.0,0.0	1.0,1.0	-0.931
39454	ENSG00000102572.10	STK24	chr13	-	99161032	99161221	99157281	99157307	99171496	99171727	39454	1,0,0,1	4,3,2,1	1,4	0,0	288	99	1.11022e-16	8.82307e-13	0.079,0.0,0.0,0.256	1.0,1.0	-0.916
29189	ENSG00000101019.17	UQCC1	chr20	-	33934503	33934550	33933518	33934226	33934966	33934992	29189	1,0,0,1	1,2,1,2	2,6	0,0	146	99	8.29672e-11	1.07894e-07	0.404,0.0,0.0,0.253	1.0,1.0	-0.836
13698	ENSG00000124019.9	FAM124B	chr2	-	225265097	225265222	225243414	225244925	225265753	225266711	13698	4,5,1,0	3,6,3,4	3,1	0,0	224	99	5.80392e-08	2.92338e-05	0.371,0.269,0.128,0.0	1.0,1.0	-0.808
44851	ENSG00000005471.11	ABCB4	chr7	-	87041208	87041349	87038551	87038708	87042932	87043033	44851	0,0,9,10	1,1,3,13	1,1	0,0	240	99	5.2917e-08	2.74263e-05	0.0,0.0,0.553,0.241	1.0,1.0	-0.801
15691	ENSG00000258700.1	LINC00871	chr14	+	46788015	46788064	46680949	46681007	46907383	46907453	15691	1,0,2,3	1,1,3,6	3,1	0,0	148	99	1.98779e-09	1.71295e-06	0.401,0.0,0.308,0.251	1.0,1.0	-0.76
1279	ENSG00000170946.10	DNAJC24	chr11	+	31395649	31395752	31392262	31392406	31429002	31429090	1279	0,0,0,1	1,4,1,0	4,4	0,0	202	99	3.082e-10	3.39134e-07	0.0,0.0,0.0,1.0	1.0,1.0	-0.75
4495	ENSG00000172660.7	TAF15	chr17	+	34144243	34144321	34136975	34137067	34144719	34144759	4495	0,0,2,0	3,3,0,6	1,4	0,0	177	99	1.41943e-11	2.41722e-08	0.0,0.0,1.0,0.0	1.0,1.0	-0.75
28493	ENSG00000227906.3	SNAP25-AS1	chr20	-	10179400	10179523	10177465	10177585	10199869	10200172	28493	0,0,2,0	1,1,0,1	1,2	0,0	222	99	1.2927e-05	0.00215021	0.0,0.0,1.0,0.0	1.0,1.0	-0.75
26100	ENSG00000182986.8	ZNF320	chr19	-	53398591	53398688	53397031	53397109	53400900	53400946	26100	0,0,0,1	1,3,1,3	2,2	0,1	196	99	8.84854e-06	0.0016145	0.0,0.0,0.0,0.144	1.0,0.503	-0.716
45205	ENSG00000140553.12	UNC45A	chr15	+	91474182	91474282	91473409	91473485	91477206	91477373	45205	0,0,4,1	2,1,0,2	1,3	0,0	199	99	1.25448e-06	0.000364737	0.0,0.0,1.0,0.199	1.0,1.0	-0.7
74659	ENSG00000185513.10	L3MBTL1	chr20	+	42159437	42159529	42158923	42159059	42161412	42161564	74659	1,3,0,0	2,0,1,1	1,1	0,0	191	99	7.32019e-05	0.00758796	0.206,1.0,0.0,0.0	1.0,1.0	-0.699
74850	ENSG00000015153.10	YAF2	chr12	-	42604349	42604421	42555414	42555567	42629415	42629557	74850	0,6,1,12	1,1,8,11	1,6	0,0	171	99	9.5039e-08	4.35742e-05	0.0,0.776,0.067,0.387	1.0,1.0	-0.693
46824	ENSG00000156398.8	SFXN2	chr10	+	104477459	104477537	104476370	104476468	104486368	104486414	46824	1,0,0,3	0,3,5,3	6,4	0,0	177	99	5.13579e-10	5.03195e-07	1.0,0.0,0.0,0.359	1.0,1.0	-0.66
63637	ENSG00000146433.8	TMEM181	chr6	+	159001971	159002027	158957467	158957897	159006335	159006457	63637	9,5,1,6	6,9,2,5	10,8	0,0	155	99	1.34797e-08	8.92704e-06	0.489,0.262,0.242,0.434	1.0,1.0	-0.643
68179	ENSG00000204843.8	DCTN1	chr2	-	74601449	74601467	74600054	74600075	74604558	74604593	68179	1,0,0,0	0,4,2,3	1,4	0,1	117	99	9.8463e-08	4.37061e-05	1.0,0.0,0.0,0.0	1.0,0.772	-0.636
20699	ENSG00000168904.10	LRRC28	chr15	+	99857668	99857751	99828018	99828156	99874222	99874334	20699	0,0,2,0	5,2,5,2	1,5	1,0	182	99	1.20173e-06	0.000350826	0.0,0.0,0.179,0.0	0.352,1.0	-0.631
62396	ENSG00000148700.9	ADD3	chr10	+	111838997	111839055	111835375	111835467	111860382	111860462	62396	4,0,0,5	1,1,2,1	4,1	0,0	157	99	0.00101353	0.048767	0.716,0.0,0.0,0.759	1.0,1.0	-0.631
69180	ENSG00000151715.3	TMEM45B	chr11	+	129698041	129698148	129685757	129685793	129722369	129722555	69180	6,4,1,8	5,1,4,7	1,1	0,0	206	99	2.89031e-06	0.000696048	0.366,0.658,0.107,0.355	1.0,1.0	-0.629
44607	ENSG00000123600.14	METTL8	chr2	-	172271112	172271236	172248552	172248707	172291183	172291290	44607	4,4,22,15	5,5,10,7	9,9	0,0	223	99	1.53864e-07	6.36125e-05	0.262,0.262,0.494,0.488	1.0,1.0	-0.623
80334	ENSG00000157856.6	DRC1	chr2	+	26647138	26647322	26644022	26644268	26652495	26652633	80334	0,5,6,0	2,0,2,1	1,6	0,0	283	99	3.87452e-05	0.0048195	0.0,1.0,0.512,0.0	1.0,1.0	-0.622
75998	ENSG00000240498.2	CDKN2B-AS1	chr9	+	22066233	22066352	22049104	22049227	22096370	22096513	75998	0,1,3,2	1,0,2,7	3,1	0,0	218	99	2.18524e-07	8.25874e-05	0.0,1.0,0.405,0.115	1.0,1.0	-0.62
28494	ENSG00000227906.3	SNAP25-AS1	chr20	-	10179400	10179523	10177465	10177585	10199884	10200402	28494	0,0,2,0	3,1,1,3	1,4	0,2	222	99	0.000841743	0.043344	0.0,0.0,0.471,0.0	1.0,0.471	-0.618
29929	ENSG00000007168.8	PAFAH1B1	chr17	+	2538676	2538804	2496503	2496624	2541392	2541614	29929	3,2,7,4	4,4,1,3	1,3	0,0	227	99	1.02396e-07	4.48154e-05	0.246,0.179,0.753,0.368	1.0,1.0	-0.614
46802	ENSG00000136869.13	TLR4	chr9	+	120470476	120470596	120466609	120466843	120470840	120471007	46802	0,4,2,6	5,6,2,0	3,4	0,0	219	99	1.49814e-07	6.22982e-05	0.0,0.232,0.311,1.0	1.0,1.0	-0.614
12996	ENSG00000129535.8	NRL	chr14	-	24562393	24562717	24553728	24553954	24564246	24564339	12996	1,3,1,5	2,2,0,5	3,3	0,0	423	99	7.75402e-09	5.54598e-06	0.105,0.26,1.0,0.19	1.0,1.0	-0.611
13349	ENSG00000161813.16	LARP4	chr12	+	50809494	50809614	50806187	50806236	50810128	50810217	13349	0,0,3,2	2,3,1,0	1,2	0,0	219	99	2.19389e-07	8.25874e-05	0.0,0.0,0.576,1.0	1.0,1.0	-0.606
43343	ENSG00000242282.2	AC108488.4	chr2	-	3580697	3580780	3579573	3579900	3581300	3581372	43343	3,2,0,0	0,6,2,3	6,3	1,0	182	99	5.36425e-06	0.00110569	1.0,0.153,0.0,0.0	0.765,1.0	-0.594
56830	ENSG00000198242.9	RPL23A	chr17	+	27047431	27047448	27047281	27047346	27047724	27047908	56830	2,5,5,17	11,4,5,12	1,4	0,0	116	99	6.51591e-06	0.00129457	0.134,0.516,0.46,0.547	1.0,1.0	-0.586
30673	ENSG00000228798.1	AP000473.5	chr21	+	18003759	18003808	18003145	18003291	18012548	18013002	30673	4,4,1,4	5,4,3,1	1,3	0,0	148	99	4.57374e-07	0.000157275	0.349,0.401,0.182,0.728	1.0,1.0	-0.585
50803	ENSG00000184984.8	CHRM5	chr15	+	34338740	34339072	34261088	34261351	34354843	34357291	50803	10,20,1,5	0,5,4,7	2,6	0,0	431	99	5.04588e-07	0.000170236	1.0,0.479,0.054,0.141	1.0,1.0	-0.581
82431	ENSG00000134644.11	PUM1	chr1	-	31528159	31528227	31501642	31501711	31532145	31532424	82431	2,0,5,3	2,1,0,4	3,2	0,0	167	99	7.00566e-05	0.0073389	0.372,0.0,1.0,0.308	1.0,1.0	-0.58
81077	ENSG00000123358.15	NR4A1	chr12	+	52446257	52446429	52445242	52445352	52448110	52448666	81077	15,18,5,13	16,23,2,5	14,18	1,0	271	99	4.19659e-08	2.3089e-05	0.255,0.222,0.477,0.487	0.836,1.0	-0.558
53930	ENSG00000167508.6	MVD	chr16	-	88723553	88723655	88722668	88722969	88723843	88723990	53930	7,4,6,14	4,4,4,5	1,6	0,0	201	99	7.69972e-06	0.00146857	0.463,0.33,0.425,0.58	1.0,1.0	-0.55
54240	ENSG00000145147.15	SLIT2	chr4	+	20492425	20492437	20490441	20490605	20493383	20493522	54240	2,1,0,0	5,15,3,3	3,3	8,0	111	99	9.62139e-05	0.00917547	0.263,0.056,0.0,0.0	0.251,1.0	-0.546
22423	ENSG00000168214.16	RBPJ	chr4	+	26411663	26411914	26407796	26407892	26414551	26414609	22423	0,3,2,3	4,0,1,1	4,4	0,0	350	99	3.36861e-06	0.000780017	0.0,1.0,0.361,0.459	1.0,1.0	-0.545
7342	ENSG00000168970.16	JMJD7-PLA2G4B	chr15	+	42135323	42135421	42134390	42134789	42135873	42136009	7342	0,2,1,2	2,4,3,1	2,4	1,0	197	99	8.10353e-05	0.00816333	0.0,0.201,0.143,0.501	0.501,1.0	-0.539
81080	ENSG00000123358.15	NR4A1	chr12	+	52446279	52446429	52445190	52445352	52448110	52448457	81080	17,19,5,13	16,23,2,5	14,20	1,0	249	99	2.78287e-08	1.61823e-05	0.297,0.247,0.498,0.508	0.848,1.0	-0.536
52875	ENSG00000237943.2	PRKCQ-AS1	chr10	+	6624099	6624163	6622386	6622889	6625637	6625990	52875	2,1,18,25	3,1,18,18	2,7	0,1	163	99	0.000141247	0.011958	0.288,0.378,0.378,0.458	1.0,0.81	-0.53
1199	ENSG00000122591.7	FAM126A	chr7	-	22986651	22986866	22985601	22985782	22999874	23000034	1199	14,11,2,5	5,6,2,5	28,26	1,2	314	99	9.94829e-06	0.00178779	0.469,0.366,0.24,0.24	0.898,0.804	-0.522
47710	ENSG00000259248.1	USP3-AS1	chr15	-	63885947	63886076	63879908	63881299	63886893	63886985	47710	8,6,5,8	4,0,10,9	3,5	0,0	228	99	2.0751e-06	0.00053581	0.465,1.0,0.178,0.278	1.0,1.0	-0.52
63632	ENSG00000013375.11	PGM3	chr6	-	83900905	83901042	83900527	83900733	83903541	83903633	63632	3,1,3,11	2,1,1,2	8,3	0,0	236	99	0.000310546	0.0214811	0.386,0.296,0.557,0.698	1.0,1.0	-0.516
31302	ENSG00000269609.1	RP11-18I14.10	chr10	+	104211846	104211944	104211155	104211312	104215093	104216050	31302	0,2,10,11	2,1,15,19	3,2	0,1	197	99	0.000919907	0.0458505	0.0,0.501,0.251,0.225	1.0,0.501	-0.506
34486	ENSG00000058056.4	USP13	chr3	+	179408028	179408089	179370542	179371181	179424721	179424864	34486	4,5,1,3	0,7,1,4	4,4	0,0	160	99	3.46046e-06	0.000793289	1.0,0.307,0.382,0.317	1.0,1.0	-0.498
45912	ENSG00000147421.13	HMBOX1	chr8	+	28782156	28782272	28748832	28749001	28821327	28821407	45912	2,4,3,5	3,0,2,4	1,2	0,0	215	99	1.86051e-06	0.000500032	0.235,1.0,0.409,0.365	1.0,1.0	-0.498
34083	ENSG00000237298.4	TTN-AS1	chr2	+	179436026	179436176	179387950	179388363	179455865	179456041	34083	6,3,0,6	5,0,2,1	6,4	0,0	249	99	3.00542e-05	0.00400664	0.323,1.0,0.0,0.705	1.0,1.0	-0.493
63842	ENSG00000187678.8	SPRY4	chr5	-	141699297	141699359	141694522	141694720	141703454	141703747	63842	3,4,5,11	2,2,3,7	1,5	0,0	161	99	1.14217e-05	0.00195436	0.48,0.552,0.506,0.491	1.0,1.0	-0.493
74797	ENSG00000137210.9	TMEM14B	chr6	+	10827929	10828057	10749854	10749931	10829239	10829419	74797	4,0,3,6	2,2,0,2	1,1	0,0	227	99	8.96853e-05	0.00873931	0.466,0.0,1.0,0.567	1.0,1.0	-0.492
77371	ENSG00000123427.11	METTL21B	chr12	+	58168411	58168550	58166799	58166911	58174037	58174213	77371	1,3,0,0	7,4,7,8	2,5	1,1	238	99	2.31013e-05	0.00329261	0.056,0.238,0.0,0.0	0.454,0.675	-0.491
18780	ENSG00000125388.15	GRK4	chr4	+	3039100	3039238	3030927	3031136	3042298	3042454	18780	2,0,10,9	1,5,5,6	4,4	1,0	237	99	0.00046931	0.0293674	0.455,0.0,0.455,0.385	0.626,1.0	-0.489
31162	ENSG00000137177.14	KIF13A	chr6	-	17790102	17790141	17788006	17788106	17794479	17794626	31162	3,0,0,0	3,2,1,3	4,2	2,1	138	99	9.77658e-05	0.00924948	0.418,0.0,0.0,0.0	0.589,0.589	-0.484
68594	ENSG00000155542.7	SETD9	chr5	+	56206868	56206938	56205913	56206221	56207135	56207363	68594	4,5,16,21	3,3,11,6	2,2	0,0	169	99	6.17611e-05	0.00679287	0.439,0.494,0.46,0.672	1.0,1.0	-0.484
12620	ENSG00000079102.12	RUNX1T1	chr8	-	93074773	93074855	93029453	93029591	93115084	93115514	12620	3,2,4,2	5,5,3,3	2,4	1,0	181	99	0.000448677	0.0283004	0.247,0.18,0.422,0.267	0.522,1.0	-0.482
57510	ENSG00000105983.15	LMBR1	chr7	-	156626446	156626486	156589082	156589186	156685621	156685873	57510	2,1,4,0	1,0,3,3	4,4	0,0	139	99	3.49514e-05	0.00448808	0.588,1.0,0.487,0.0	1.0,1.0	-0.481
82093	ENSG00000142875.15	PRKACB	chr1	+	84640715	84640739	84610004	84610231	84644859	84644921	82093	4,4,0,2	1,5,2,2	3,4	0,1	123	99	0.000495985	0.0303723	0.763,0.392,0.0,0.446	1.0,0.763	-0.481
8801	ENSG00000078304.15	PPP2R5C	chr14	+	102285328	102285422	102252457	102252520	102302505	102303038	8801	0,0,1,2	4,5,3,0	1,2	0,1	193	99	0.000840842	0.043344	0.0,0.0,0.146,1.0	1.0,0.506	-0.467
41041	ENSG00000241769.3	LINC00893	chrX	-	148620256	148620439	148619646	148619704	148622239	148622358	41041	4,10,2,10	2,2,8,0	7,3	0,0	282	99	4.55594e-06	0.000981504	0.413,0.637,0.081,1.0	1.0,1.0	-0.467
18779	ENSG00000125388.15	GRK4	chr4	+	3037112	3037250	3030927	3031136	3042298	3042454	18779	2,2,5,14	1,5,5,6	4,5	1,0	237	99	0.000442599	0.0279898	0.455,0.143,0.295,0.494	0.626,1.0	-0.466
82774	ENSG00000104325.2	DECR1	chr8	+	91017519	91017597	91013703	91013789	91029430	91029554	82774	1,5,1,5	10,3,20,15	7,15	2,5	177	99	2.93437e-06	0.000704288	0.053,0.482,0.027,0.157	0.662,0.627	-0.465
41594	ENSG00000172766.14	NAA16	chr13	+	41947903	41948016	41946950	41946966	41948877	41948975	41594	4,4,10,2	2,1,1,4	2,4	0,0	212	99	5.49716e-06	0.00112656	0.483,0.651,0.824,0.189	1.0,1.0	-0.463
4795	ENSG00000113387.7	SUB1	chr5	+	32571196	32571280	32536743	32536801	32588617	32588690	4795	3,4,1,2	0,1,4,2	2,1	0,0	183	99	4.35603e-05	0.00528069	1.0,0.684,0.119,0.351	1.0,1.0	-0.462
77542	ENSG00000152578.8	GRIA4	chr11	+	105816189	105816228	105804667	105804695	105845036	105845284	77542	10,7,3,3	1,5,2,6	11,7	0,0	138	99	1.78108e-06	0.000484373	0.878,0.501,0.518,0.264	1.0,1.0	-0.46
28265	ENSG00000111752.6	PHC1	chr12	+	9075228	9075252	9073580	9073661	9083030	9083523	28265	2,2,0,0	2,1,1,5	2,1	0,1	123	99	0.000370934	0.024611	0.446,0.617,0.0,0.0	1.0,0.446	-0.457
17439	ENSG00000137274.8	BPHL	chr6	+	3138274	3138413	3137595	3137656	3140619	3140743	17439	3,3,2,5	2,2,0,3	5,5	0,0	238	99	6.61735e-06	0.00131108	0.384,0.384,1.0,0.409	1.0,1.0	-0.456
16732	ENSG00000205981.2	DNAJC19	chr3	-	180704785	180704810	180703713	180703784	180707387	180707557	16732	2,0,0,1	2,3,3,1	7,2	0,3	124	99	0.000109784	0.00999668	0.444,0.0,0.0,0.444	1.0,0.347	-0.452
33272	ENSG00000101901.6	ALG13	chrX	+	110932314	110932425	110928192	110928331	110954902	110954953	33272	5,4,3,8	0,3,3,4	5,3	0,0	210	99	3.1027e-06	0.000735848	1.0,0.386,0.32,0.485	1.0,1.0	-0.452
77692	ENSG00000247498.5	RP11-392P7.6	chr12	+	13131874	13131955	13119692	13119831	13132457	13132556	77692	1,1,3,2	0,1,1,4	2,5	0,0	180	99	0.000376509	0.0248885	1.0,0.355,0.623,0.216	1.0,1.0	-0.452
82816	ENSG00000119979.11	FAM45A	chr10	+	120864822	120865007	120864275	120864534	120867479	120867676	82816	9,11,4,5	8,10,0,1	6,5	0,0	284	99	2.69717e-06	0.000656165	0.282,0.277,1.0,0.635	1.0,1.0	-0.452
67525	ENSG00000178401.10	DNAJC22	chr12	+	49741426	49741888	49740699	49741334	49742548	49743495	67525	23,22,30,24	9,12,2,8	39,28	0,2	561	99	0.000147057	0.0123452	0.311,0.244,0.726,0.346	1.0,0.712	-0.449
12592	ENSG00000255621.1	RP11-377D9.3	chr12	+	13172445	13173378	13161028	13161089	13174947	13175095	12592	2,3,0,3	0,0,2,1	6,4	0,0	1032	99	0.000477531	0.0296412	1.0,1.0,0.0,0.223	1.0,1.0	-0.444
63941	ENSG00000122515.10	ZMIZ2	chr7	+	44789413	44789579	44788179	44788230	44795786	44795898	63941	5,5,3,4	2,3,2,0	2,6	0,0	265	99	1.09687e-05	0.00190419	0.483,0.384,0.359,1.0	1.0,1.0	-0.444
998	ENSG00000110717.6	NDUFS8	chr11	+	67803094	67803255	67801318	67801641	67803719	67803848	998	7,16,3,7	8,6,2,2	7,10	1,0	260	99	0.000101011	0.00945751	0.25,0.504,0.364,0.571	0.727,1.0	-0.441
50130	ENSG00000147677.6	EIF3H	chr8	-	117746515	117746563	117738254	117738411	117749475	117749526	50130	2,1,5,8	0,1,5,6	2,2	0,0	147	99	9.40502e-06	0.00171167	1.0,0.402,0.402,0.473	1.0,1.0	-0.431
63065	ENSG00000236624.4	CCDC163P	chr1	-	45961089	45961217	45959537	45960838	45962227	45962295	63065	8,7,4,9	4,0,3,5	6,7	0,0	227	99	3.99766e-06	0.000893527	0.466,1.0,0.368,0.44	1.0,1.0	-0.431
53639	ENSG00000144451.14	SPAG16	chr2	+	214794683	214794869	214727208	214727352	214878674	214878801	53639	6,7,1,1	2,1,0,4	3,1	0,0	285	99	2.23196e-05	0.00322502	0.51,0.709,1.0,0.08	1.0,1.0	-0.425
30473	ENSG00000088986.6	DYNLL1	chr12	+	120933086	120933240	120926380	120926456	120934218	120934350	30473	3,7,3,2	2,1,0,3	1,2	0,0	253	99	0.00020956	0.0160821	0.37,0.733,1.0,0.207	1.0,1.0	-0.423
14289	ENSG00000174600.9	CMKLR1	chr12	-	108723771	108723984	108687365	108687441	108732803	108733090	14289	20,11,5,6	4,1,2,2	6,7	0,0	312	99	6.46049e-06	0.00128713	0.613,0.777,0.442,0.488	1.0,1.0	-0.42
86798	ENSG00000105483.12	CARD8	chr19	-	48735709	48736046	48734916	48735067	48737659	48737800	86798	7,7,6,8	4,2,2,2	8,7	1,0	436	99	0.000847732	0.0434646	0.284,0.443,0.405,0.476	0.645,1.0	-0.42
44065	ENSG00000227136.2	LINC00595	chr10	+	80029790	80029866	80027084	80027243	80039351	80039970	44065	2,3,3,5	0,2,2,4	3,8	0,0	175	99	1.01271e-05	0.00179364	1.0,0.459,0.459,0.414	1.0,1.0	-0.417
45429	ENSG00000163138.14	PACRGL	chr4	+	20720438	20720599	20717729	20717871	20728907	20729980	45429	4,3,1,4	0,2,2,6	6,5	1,0	260	99	0.000528725	0.0316054	1.0,0.364,0.16,0.202	0.696,1.0	-0.417
42764	ENSG00000070081.11	NUCB2	chr11	+	17308180	17308260	17304335	17304490	17312786	17312912	42764	8,7,13,14	6,1,5,7	13,17	0,0	179	99	3.26608e-07	0.000117389	0.424,0.795,0.59,0.525	1.0,1.0	-0.416
52346	ENSG00000005379.11	BZRAP1	chr17	-	56397469	56397490	56396450	56396655	56397891	56397942	52346	3,2,3,2	1,2,2,1	5,1	0,0	120	99	0.000889256	0.0448225	0.712,0.452,0.553,0.623	1.0,1.0	-0.415
53823	ENSG00000099810.14	MTAP	chr9	+	21808805	21808999	21803276	21803380	21815431	21815518	53823	1,2,6,6	0,0,9,11	10,5	0,0	293	99	4.28178e-05	0.00521721	1.0,1.0,0.184,0.156	1.0,1.0	-0.415
28812	ENSG00000140526.12	ABHD2	chr15	+	89645730	89645807	89631652	89631794	89647133	89647275	28812	18,6,8,15	5,2,3,9	4,1	0,0	176	99	5.96843e-05	0.00658774	0.669,0.628,0.6,0.484	1.0,1.0	-0.405
42766	ENSG00000070081.11	NUCB2	chr11	+	17308180	17308264	17304335	17304490	17312786	17312912	42766	9,7,18,13	6,1,5,7	13,16	0,0	183	99	6.75911e-07	0.000220748	0.448,0.791,0.661,0.501	1.0,1.0	-0.4
14955	ENSG00000160145.11	KALRN	chr3	+	124397036	124397160	124393207	124393461	124412650	124412678	14955	10,12,5,7	5,0,3,3	9,8	0,0	223	99	7.74107e-06	0.00147253	0.47,1.0,0.425,0.509	1.0,1.0	-0.399
47182	ENSG00000115827.9	DCAF17	chr2	+	172334496	172334580	172325397	172325540	172337483	172337677	47182	5,2,3,3	2,4,1,0	2,1	0,0	183	99	8.33271e-05	0.00833626	0.575,0.213,0.619,1.0	1.0,1.0	-0.398
22151	ENSG00000198182.8	ZNF607	chr19	-	38202510	38202593	38187263	38190796	38209915	38210026	22151	3,8,2,2	4,0,1,3	9,10	1,0	182	99	0.000623301	0.0353256	0.29,1.0,0.521,0.266	0.83,1.0	-0.396
79524	ENSG00000137075.13	RNF38	chr9	-	36390463	36390613	36375930	36376124	36400932	36401195	79524	8,7,14,10	4,1,4,2	8,6	0,0	249	99	4.20094e-06	0.000924457	0.443,0.736,0.582,0.665	1.0,1.0	-0.393
25164	ENSG00000131374.10	TBC1D5	chr3	-	17603510	17603634	17549965	17550097	17627844	17628049	25164	27,12,14,32	9,9,6,8	27,22	0,2	223	99	1.45559e-05	0.00235542	0.571,0.372,0.509,0.64	1.0,0.83	-0.392
46849	ENSG00000160613.8	PCSK7	chr11	-	117078369	117078451	117077396	117077514	117078685	117078780	46849	9,4,2,10	5,3,4,1	6,5	1,0	181	99	0.000656228	0.0366975	0.496,0.422,0.215,0.845	0.766,1.0	-0.389
21827	ENSG00000120137.6	PANK3	chr5	-	168005638	168005712	167993241	167993271	168006260	168006355	21827	5,8,9,7	3,7,4,3	13,15	1,1	173	99	0.000232203	0.0172138	0.488,0.395,0.563,0.572	0.882,0.896	-0.385
64621	ENSG00000164674.11	SYTL3	chr6	+	159139118	159139243	159129353	159129423	159146534	159146669	64621	3,2,5,4	2,0,3,1	1,3	0,0	224	99	0.000450261	0.028374	0.399,1.0,0.424,0.639	1.0,1.0	-0.385
4402	ENSG00000150627.11	WDR17	chr4	+	177087274	177087295	177084304	177084444	177089822	177089934	4402	10,9,15,14	15,17,35,37	23,12	5,8	120	99	5.6259e-05	0.00631681	0.355,0.304,0.261,0.238	0.791,0.553	-0.383
44223	ENSG00000163660.7	CCNL1	chr3	-	156869274	156869380	156868070	156868170	156869517	156869719	44223	9,4,4,18	2,1,4,2	2,1	0,0	205	99	2.59392e-05	0.0035955	0.685,0.659,0.326,0.813	1.0,1.0	-0.379
1198	ENSG00000122591.7	FAM126A	chr7	-	22986570	22986866	22980887	22985782	22999874	23000034	1198	22,20,9,17	5,6,2,5	46,36	1,2	395	99	8.0148e-05	0.00809676	0.524,0.455,0.53,0.46	0.92,0.819	-0.377
28365	ENSG00000255468.2	RP11-867G23.8	chr11	+	66116805	66116941	66115420	66115541	66120925	66121090	28365	1,0,1,0	4,5,0,2	4,3	0,3	235	99	0.000542194	0.032023	0.095,0.0,1.0,0.0	1.0,0.296	-0.374
10029	ENSG00000116406.14	EDEM3	chr1	-	184662499	184662566	184659636	184661279	184663177	184663606	10029	1,1,16,12	0,4,1,8	1,4	0,0	166	99	0.000127739	0.0110902	1.0,0.13,0.905,0.472	1.0,1.0	-0.373
11628	ENSG00000091592.11	NLRP1	chr17	-	5424200	5424332	5421065	5421207	5424843	5425106	11628	7,4,4,4	1,2,0,4	13,5	0,0	231	99	8.90822e-05	0.00870426	0.75,0.462,1.0,0.3	1.0,1.0	-0.372
70773	ENSG00000125462.12	C1orf61	chr1	-	156384445	156384545	156374047	156374393	156391346	156391544	70773	1,0,4,8	2,1,26,18	5,10	2,7	199	99	0.000440824	0.0279315	0.199,0.0,0.071,0.181	0.554,0.415	-0.372
86407	ENSG00000166169.12	POLL	chr10	-	103346878	103346957	103345618	103345913	103347960	103348005	86407	7,2,3,5	2,3,0,2	7,5	0,0	178	99	9.3021e-05	0.00894252	0.661,0.27,1.0,0.582	1.0,1.0	-0.372
1095	ENSG00000179818.9	PCBP1-AS1	chr2	-	70304432	70304513	70278341	70278437	70310638	70310819	1095	1,1,0,0	4,3,3,7	4,1	2,1	180	99	9.13315e-05	0.0088283	0.121,0.155,0.0,0.0	0.524,0.355	-0.37
44067	ENSG00000227136.2	LINC00595	chr10	+	80039155	80039251	80027166	80027243	80039351	80039970	44067	6,2,6,12	0,2,2,4	7,7	0,0	195	99	6.64186e-05	0.00710094	1.0,0.337,0.604,0.604	1.0,1.0	-0.364
49997	ENSG00000104529.13	EEF1D	chr8	-	144672777	144672908	144668898	144669022	144678257	144678515	49997	18,6,22,31	8,14,2,4	13,23	1,0	230	99	4.40149e-05	0.00532677	0.492,0.156,0.826,0.769	0.848,1.0	-0.363
71140	ENSG00000118690.8	ARMC2	chr6	+	109215669	109215746	109197345	109197553	109220896	109220995	71140	4,2,11,22	2,2,4,2	13,16	0,1	176	99	0.000506872	0.0306713	0.529,0.36,0.607,0.861	1.0,0.9	-0.361
14704	ENSG00000066933.11	MYO9A	chr15	-	72185305	72185518	72180344	72180457	72186019	72186119	14704	40,31,31,27	23,28,19,27	46,50	7,9	312	99	1.98953e-07	7.73363e-05	0.356,0.26,0.341,0.241	0.676,0.638	-0.358
67372	ENSG00000075035.5	WSCD2	chr12	+	108561201	108561358	108523379	108523703	108589058	108589343	67372	5,4,4,2	3,6,1,1	6,3	0,1	256	99	0.000924977	0.046039	0.392,0.205,0.607,0.436	1.0,0.537	-0.358
50132	ENSG00000147677.6	EIF3H	chr8	-	117746515	117746593	117738254	117738411	117749475	117749526	50132	2,4,6,10	0,1,5,6	4,2	0,0	177	99	1.22582e-05	0.00206295	1.0,0.691,0.402,0.482	1.0,1.0	-0.356
12630	ENSG00000079102.12	RUNX1T1	chr8	-	93088192	93088365	93029453	93029591	93115084	93115141	12630	15,12,11,9	5,5,3,3	8,8	1,0	272	99	0.000482261	0.0297842	0.522,0.466,0.572,0.522	0.744,1.0	-0.352
49795	ENSG00000026652.9	AGPAT4	chr6	-	161586608	161586745	161574377	161574531	161587279	161587449	49795	6,3,1,1	1,3,0,2	9,4	1,0	236	99	0.000368807	0.0244926	0.716,0.296,1.0,0.173	0.791,1.0	-0.349
63356	ENSG00000110031.8	LPXN	chr11	-	58331627	58331674	58322227	58322413	58338028	58338186	63356	2,6,6,11	2,1,1,5	2,10	0,0	146	99	5.1248e-05	0.00584991	0.404,0.803,0.803,0.599	1.0,1.0	-0.348
23336	ENSG00000172965.10	MIR4435-1HG	chr2	-	111991204	111991316	111965352	111966238	112101637	112101814	23336	12,3,5,6	15,15,7,7	12,13	4,5	211	99	0.000367735	0.0244638	0.273,0.086,0.251,0.287	0.585,0.55	-0.343
16612	ENSG00000251141.1	RP11-53O19.1	chr5	-	44786927	44787054	44778010	44778094	44808743	44808828	16612	5,6,10,8	1,1,3,2	3,9	0,0	226	99	0.000299694	0.0208921	0.687,0.724,0.594,0.637	1.0,1.0	-0.34
54611	ENSG00000089123.11	TASP1	chr20	-	13597503	13597770	13581189	13581264	13604092	13604161	54611	20,11,24,29	0,3,4,7	8,14	0,0	366	99	2.61605e-05	0.00361915	1.0,0.498,0.619,0.528	1.0,1.0	-0.339
82626	ENSG00000165568.13	AKR1E2	chr10	+	4883976	4884032	4881975	4882018	4884612	4884696	82626	2,2,19,16	8,0,6,2	3,2	0,0	155	99	7.83459e-05	0.00798236	0.138,1.0,0.669,0.836	1.0,1.0	-0.339
58699	ENSG00000198626.11	RYR2	chr1	+	237850754	237850804	237843755	237843877	237862264	237862325	58699	0,0,1,0	1,2,2,11	3,4	3,4	149	99	1.97829e-06	0.000519005	0.0,0.0,0.249,0.0	0.399,0.399	-0.337
19273	ENSG00000267280.1	RP11-332H18.4	chr17	-	59471982	59472099	59470818	59471108	59472739	59472808	19273	5,8,8,4	1,0,2,4	7,2	0,0	216	99	0.000216902	0.0165215	0.696,1.0,0.647,0.314	1.0,1.0	-0.336
75985	ENSG00000240498.2	CDKN2B-AS1	chr9	+	22056250	22056386	22049104	22049227	22096370	22096513	75985	5,8,5,15	1,0,2,7	2,4	0,0	235	99	4.60981e-05	0.00548606	0.678,1.0,0.513,0.474	1.0,1.0	-0.334
84617	ENSG00000163689.14	C3orf67	chr3	-	58899423	58899590	58870270	58870435	58923373	58923488	84617	24,23,15,28	7,4,4,2	11,25	0,0	266	99	7.02956e-06	0.00137748	0.561,0.682,0.583,0.839	1.0,1.0	-0.334
52185	ENSG00000122203.10	KIAA1191	chr5	-	175786483	175786570	175779624	175779751	175788604	175788764	52185	9,19,6,12	6,4,4,6	11,5	0,1	186	99	0.000282318	0.0200899	0.444,0.717,0.444,0.516	1.0,0.727	-0.333
18726	ENSG00000100614.13	PPM1A	chr14	+	60735010	60735153	60717148	60717199	60743722	60743809	18726	3,4,14,11	0,2,5,2	3,1	0,0	242	99	3.51619e-05	0.00450702	1.0,0.45,0.534,0.692	1.0,1.0	-0.331
27067	ENSG00000141503.11	MINK1	chr17	+	4795696	4795807	4795443	4795529	4795950	4796063	27067	36,33,31,57	7,9,10,24	36,40	1,1	210	99	1.97956e-07	7.73363e-05	0.708,0.634,0.594,0.528	0.944,0.95	-0.331
31849	ENSG00000215424.5	MCM3AP-AS1	chr21	+	47656137	47656240	47650240	47650441	47660747	47662913	31849	13,15,11,19	2,0,12,6	9,15	0,0	202	99	2.22051e-05	0.00321497	0.761,1.0,0.31,0.608	1.0,1.0	-0.33
77094	ENSG00000177225.12	PDDC1	chr11	-	770992	771212	767227	767368	771332	771426	77094	18,5,3,7	2,1,0,4	7,10	0,0	319	99	0.000134227	0.0114975	0.736,0.608,1.0,0.352	1.0,1.0	-0.326
1128	ENSG00000119772.12	DNMT3A	chr2	-	25472525	25472593	25470905	25471121	25474780	25474952	1128	29,35,27,31	6,6,14,19	55,72	0,4	167	99	7.75505e-08	3.71436e-05	0.741,0.776,0.533,0.492	1.0,0.914	-0.322
79334	ENSG00000186952.10	TMEM232	chr5	-	109760523	109760617	109755804	109756457	109904147	109904326	79334	10,17,7,7	4,6,1,1	7,4	0,0	193	99	2.05158e-05	0.00302551	0.562,0.592,0.782,0.782	1.0,1.0	-0.321
24160	ENSG00000186231.12	KLHL32	chr6	+	97561658	97562385	97533001	97533217	97575279	97575338	24160	5,2,10,18	0,0,2,4	11,4	0,0	826	99	0.00100478	0.048558	1.0,1.0,0.375,0.35	1.0,1.0	-0.319
11430	ENSG00000115310.13	RTN4	chr2	-	55252221	55254621	55214626	55214834	55255299	55255356	11430	113,119,296,393	20,9,13,18	399,374	10,5	2499	99	0.000209352	0.0160821	0.183,0.344,0.474,0.464	0.613,0.748	-0.314
34062	ENSG00000237298.4	TTN-AS1	chr2	+	179396040	179396305	179387893	179388363	179455865	179456041	34062	11,19,11,14	5,0,2,1	11,13	0,0	364	99	0.000104753	0.00969259	0.374,1.0,0.599,0.792	1.0,1.0	-0.309
37231	ENSG00000163625.11	WDFY3	chr4	-	85648013	85648064	85645578	85645747	85654534	85654762	37231	62,61,28,40	20,19,19,27	47,55	5,3	150	99	6.08038e-07	0.000200412	0.672,0.679,0.493,0.494	0.861,0.924	-0.308
15983	ENSG00000225793.2	RP1-234P15.4	chr6	+	75999969	76000054	75994748	75995025	76000664	76001217	15983	13,3,23,28	0,3,6,5	3,5	0,0	184	99	0.000161656	0.01329	1.0,0.35,0.673,0.751	1.0,1.0	-0.306
53285	ENSG00000183137.10	CEP57L1	chr6	+	109427237	109427293	109421394	109421489	109461623	109461878	53285	7,6,3,13	0,2,6,1	9,5	0,0	155	99	0.000389725	0.0254796	1.0,0.657,0.242,0.893	1.0,1.0	-0.302
1281	ENSG00000170946.10	DNAJC24	chr11	+	31395649	31395752	31392262	31392406	31447833	31449525	1281	0,0,3,1	8,5,4,5	4,4	2,5	202	99	0.000462752	0.0290078	0.0,0.0,0.269,0.089	0.495,0.282	-0.299
19731	ENSG00000058453.12	CROCC	chr1	+	17297959	17298142	17297130	17297262	17298854	17299474	19731	17,12,8,11	4,1,1,2	21,31	0,0	282	99	3.55726e-05	0.00452722	0.599,0.808,0.737,0.659	1.0,1.0	-0.299
37068	ENSG00000120370.8	GORAB	chr1	+	170502604	170502792	170501291	170501425	170505450	170505562	37068	12,14,11,25	4,1,2,2	12,17	0,0	287	99	4.74718e-05	0.00555192	0.509,0.828,0.655,0.812	1.0,1.0	-0.299
58170	ENSG00000227811.2	RP4-773A18.4	chr1	+	112286996	112287151	112282462	112282699	112288681	112290420	58170	10,11,21,40	3,2,4,2	6,16	0,0	254	99	7.62505e-05	0.0078246	0.565,0.682,0.672,0.886	1.0,1.0	-0.299
67212	ENSG00000148357.12	HMCN2	chr9	+	133302883	133303006	133302699	133302762	133303744	133303876	67212	10,2,14,24	0,1,4,4	1,5	0,0	222	99	0.000286322	0.0202361	1.0,0.471,0.609,0.728	1.0,1.0	-0.298
80645	ENSG00000144935.10	TRPC1	chr3	+	142509860	142510000	142467099	142467302	142521010	142521186	80645	12,11,13,19	2,6,0,4	8,8	0,0	239	99	4.47526e-05	0.00538869	0.713,0.432,1.0,0.663	1.0,1.0	-0.298
1081	ENSG00000179818.9	PCBP1-AS1	chr2	-	70282845	70283042	70280862	70280924	70286774	70286812	1081	7,17,4,13	2,4,0,2	7,3	0,0	296	99	6.39726e-05	0.006915	0.539,0.587,1.0,0.685	1.0,1.0	-0.297
86797	ENSG00000105483.12	CARD8	chr19	-	48735709	48735750	48734916	48735067	48737659	48737800	86797	13,11,2,6	4,2,2,2	11,12	1,0	140	99	0.00083157	0.0429438	0.697,0.795,0.414,0.68	0.886,1.0	-0.297
23098	ENSG00000113597.13	TRAPPC13	chr5	+	64951462	64951480	64948327	64948372	64954194	64954328	23098	92,45,24,31	115,118,294,306	95,96	70,99	117	99	4.19551e-09	3.29758e-06	0.404,0.244,0.065,0.079	0.535,0.451	-0.295
49904	ENSG00000232593.2	RP11-258C19.5	chrX	+	53123581	53123656	53123326	53123466	53128653	53128790	49904	14,10,9,8	4,2,2,2	9,4	0,0	174	99	0.000153248	0.0128198	0.666,0.74,0.719,0.695	1.0,1.0	-0.295
53550	ENSG00000050130.13	JKAMP	chr14	+	59951707	59951834	59951209	59951311	59953398	59953522	53550	19,20,20,15	4,3,8,8	22,17	1,1	226	99	0.000950264	0.0468023	0.675,0.745,0.523,0.451	0.906,0.882	-0.295
19987	ENSG00000036054.8	TBC1D23	chr3	+	100030676	100030721	100029246	100029386	100034942	100035031	19987	168,203,127,148	117,98,150,168	230,259	59,53	144	99	9.42175e-11	1.20336e-07	0.497,0.587,0.368,0.377	0.728,0.771	-0.292
38509	ENSG00000121281.8	ADCY7	chr16	+	50324367	50324571	50300426	50300498	50326586	50326736	38509	27,14,24,28	4,4,3,1	21,33	0,0	303	99	1.70371e-05	0.00261493	0.688,0.533,0.723,0.901	1.0,1.0	-0.289
26138	ENSG00000228106.1	RP11-452F19.3	chr1	+	222997197	222997287	222988419	222988513	223008460	223008557	26138	8,11,9,23	4,5,0,3	8,6	0,0	189	99	6.35442e-05	0.00688627	0.512,0.535,1.0,0.801	1.0,1.0	-0.288
84619	ENSG00000163689.14	C3orf67	chr3	-	58899433	58899590	58870270	58870435	58923373	58923488	84619	26,26,21,36	7,4,4,2	16,30	0,0	256	99	8.6087e-06	0.00158693	0.59,0.715,0.67,0.874	1.0,1.0	-0.288
33300	ENSG00000101901.6	ALG13	chrX	+	110987895	110988132	110979941	110980107	110996017	110996058	33300	54,36,43,51	13,16,11,29	53,53	7,4	336	99	0.000362252	0.0241695	0.55,0.399,0.535,0.341	0.69,0.796	-0.287
17861	ENSG00000114857.13	NKTR	chr3	+	42661507	42661535	42661155	42661200	42662920	42663008	17861	13,24,10,6	29,24,35,53	20,12	17,7	127	99	0.000725407	0.0391282	0.259,0.438,0.182,0.081	0.478,0.572	-0.285
20220	ENSG00000198901.9	PRC1	chr15	-	91512308	91512350	91509694	91509883	91512753	91512853	20220	16,9,3,5	29,30,11,16	26,25	16,23	141	99	4.7387e-05	0.00555192	0.279,0.174,0.161,0.18	0.533,0.433	-0.284
66287	ENSG00000133401.11	PDZD2	chr5	+	31995681	31995824	31983260	31983762	32010435	32010588	66287	21,20,3,11	2,4,2,0	4,3	0,0	242	99	0.00045278	0.0284907	0.811,0.672,0.38,1.0	1.0,1.0	-0.284
12291	ENSG00000035115.17	SH3YL1	chr2	-	260084	260702	253004	253115	262630	262786	12291	34,16,53,67	1,2,3,2	33,39	0,0	717	99	0.000126238	0.011011	0.824,0.525,0.709,0.822	1.0,1.0	-0.28
41919	ENSG00000183023.14	SLC8A1	chr2	-	40673554	40673788	40657200	40657444	40679043	40679148	41919	6,11,0,3	22,19,3,5	12,5	5,3	333	99	0.000823812	0.0426609	0.075,0.147,0.0,0.151	0.416,0.331	-0.28
2333	ENSG00000196776.10	CD47	chr3	-	107768465	107768498	107765925	107766139	107776323	107776416	2333	86,80,35,89	46,72,140,166	66,70	26,29	132	99	9.74247e-05	0.00924165	0.584,0.455,0.158,0.287	0.656,0.644	-0.279
68737	ENSG00000133731.5	IMPA1	chr8	-	82590817	82590924	82588468	82588500	82591360	82591465	68737	10,9,12,12	1,1,1,9	3,4	0,0	206	99	8.30619e-05	0.00833626	0.828,0.812,0.852,0.391	1.0,1.0	-0.279
63635	ENSG00000146433.8	TMEM181	chr6	+	158994451	158994555	158957467	158957897	159006335	159006457	63635	23,27,19,52	6,9,2,5	14,16	0,0	203	99	1.62653e-05	0.00252355	0.652,0.594,0.822,0.835	1.0,1.0	-0.274
50719	ENSG00000101391.16	CDK5RAP1	chr20	-	31979947	31980048	31973455	31973576	31989233	31989258	50719	10,20,19,18	10,2,0,3	13,8	0,0	200	99	0.000122292	0.0108387	0.331,0.832,1.0,0.748	1.0,1.0	-0.272
57303	ENSG00000169554.12	ZEB2	chr2	-	145275859	145276013	145274844	145274986	145277505	145277907	57303	4,3,0,10	26,15,30,49	2,8	3,4	253	99	0.000479797	0.0297167	0.057,0.073,0.0,0.074	0.207,0.439	-0.272
44966	ENSG00000151914.13	DST	chr6	-	56394245	56394572	56393638	56393723	56394771	56394931	44966	350,355,218,248	31,24,27,31	408,517	2,5	426	99	0	0	0.724,0.775,0.652,0.65	0.979,0.96	-0.269
14062	ENSG00000165813.12	C10orf118	chr10	-	115932899	115933024	115917312	115917439	115933773	115933961	14062	5,10,13,14	6,0,3,0	15,12	0,0	224	99	0.000881724	0.0445685	0.269,1.0,0.657,1.0	1.0,1.0	-0.268
54038	ENSG00000105193.4	RPS16	chr19	-	39924133	39924209	39923846	39924058	39926246	39926348	54038	12,11,14,9	3,6,1,1	4,5	0,0	175	99	8.36845e-05	0.00833626	0.694,0.509,0.888,0.836	1.0,1.0	-0.268
59843	ENSG00000117569.14	PTBP2	chr1	+	97271974	97272008	97270340	97270495	97272421	97272514	59843	3,2,6,3	27,23,20,27	36,17	41,25	133	99	2.03476e-08	1.26551e-05	0.076,0.061,0.183,0.076	0.395,0.336	-0.267
25473	ENSG00000130779.15	CLIP1	chr12	-	122821178	122821295	122819194	122819252	122825527	122826244	25473	63,68,38,59	1,5,15,20	34,49	0,0	216	99	1.02372e-06	0.000312909	0.967,0.862,0.537,0.575	1.0,1.0	-0.265
56462	ENSG00000112851.10	ERBB2IP	chr5	+	65367996	65368119	65364704	65364848	65370851	65371058	56462	9,9,1,10	1,2,0,5	19,16	0,0	222	99	4.8627e-05	0.00562222	0.801,0.667,1.0,0.471	1.0,1.0	-0.265
27147	ENSG00000176406.16	RIMS2	chr8	+	104922548	104922757	104897525	104898451	104924280	104924400	27147	36,35,45,48	6,7,3,5	54,70	0,1	308	99	1.74345e-06	0.000475947	0.659,0.616,0.828,0.755	1.0,0.957	-0.264
24889	ENSG00000101745.11	ANKRD12	chr18	+	9204473	9204542	9195548	9195696	9208654	9208801	24889	23,25,38,53	28,23,25,39	54,41	22,8	168	99	0.000934422	0.0464122	0.326,0.39,0.472,0.445	0.591,0.751	-0.263
21935	ENSG00000162390.13	ACOT11	chr1	+	55058218	55058279	55050327	55050535	55059613	55059712	21935	7,6,5,8	0,0,3,6	2,8	0,0	160	99	0.000477054	0.0296412	1.0,1.0,0.508,0.452	1.0,1.0	-0.26
30983	ENSG00000115677.12	HDLBP	chr2	-	242208243	242208368	242207891	242207956	242208615	242208710	30983	27,27,15,42	3,1,3,15	19,24	0,0	224	99	9.88477e-06	0.00178535	0.799,0.923,0.688,0.553	1.0,1.0	-0.259
39363	ENSG00000175279.17	APITD1	chr1	+	10493898	10494022	10490499	10490625	10500403	10500470	39363	17,9,5,23	2,1,6,1	21,27	1,0	223	99	0.000880251	0.044557	0.791,0.8,0.27,0.911	0.903,1.0	-0.258
24386	ENSG00000189164.10	ZNF527	chr19	+	37870949	37871274	37870021	37870148	37879207	37883968	24386	25,29,10,30	0,5,2,1	11,24	0,0	424	99	0.000257014	0.0187387	1.0,0.575,0.539,0.875	1.0,1.0	-0.253
42821	ENSG00000107890.12	ANKRD26	chr10	-	27294551	27294652	27283969	27284076	27295845	27295891	42821	7,10,22,24	3,1,1,5	24,21	0,0	200	99	8.55803e-05	0.00845037	0.536,0.832,0.916,0.704	1.0,1.0	-0.253
65599	ENSG00000173041.7	ZNF680	chr7	-	64021323	64021651	63982827	63982878	64023302	64023453	65599	13,6,2,3	13,15,3,3	28,15	10,5	427	99	0.000138007	0.0117509	0.188,0.085,0.134,0.188	0.394,0.41	-0.253
2570	ENSG00000140395.4	WDR61	chr15	-	78577602	78577681	78570549	78570643	78581960	78582054	2570	18,9,13,4	2,1,4,1	5,4	0,0	178	99	0.000263024	0.0190796	0.833,0.833,0.644,0.69	1.0,1.0	-0.25
5812	ENSG00000165480.11	SKA3	chr13	-	21734040	21734126	21729831	21729950	21750513	21750686	5812	0,0,0,0	3,4,1,1	1,4	3,4	185	99	0.000702319	0.0383488	0.0,0.0,0.0,0.0	0.151,0.349	-0.25
64097	ENSG00000089169.10	RPH3A	chr12	+	113274295	113274307	113266105	113266194	113285500	113285536	64097	8,3,1,2	33,50,24,42	5,8	7,20	111	99	0.000405487	0.0263176	0.178,0.051,0.036,0.041	0.389,0.263	-0.25
64159	ENSG00000254469.3	RP11-849H4.2	chr11	-	71634354	71634521	71629930	71630072	71639410	71639483	64159	19,29,13,33	3,4,2,2	25,10	0,0	266	99	0.000105565	0.00974247	0.702,0.73,0.708,0.86	1.0,1.0	-0.25
21266	ENSG00000127314.13	RAP1B	chr12	+	69018454	69018653	69004687	69004832	69034817	69034933	21266	19,16,14,22	2,1,2,3	22,21	0,0	298	99	0.000297345	0.0207891	0.759,0.842,0.699,0.709	1.0,1.0	-0.248
43630	ENSG00000135845.5	PIGC	chr1	-	172384433	172384514	172362273	172363550	172413127	172413223	43630	3,2,6,8	0,0,2,7	1,3	0,0	180	99	0.000547552	0.0322862	1.0,1.0,0.623,0.386	1.0,1.0	-0.248
65664	ENSG00000204842.10	ATXN2	chr12	-	111953957	111954167	111950276	111951343	111956052	111956231	65664	82,91,89,110	35,20,56,75	111,108	16,19	309	99	6.24949e-05	0.00682425	0.429,0.593,0.337,0.32	0.69,0.646	-0.248
11841	ENSG00000075413.13	MARK3	chr14	+	103964838	103964865	103957875	103958371	103969218	103969589	11841	107,118,41,68	123,152,104,172	180,223	116,130	126	99	5.73116e-09	4.3149e-06	0.406,0.379,0.236,0.237	0.549,0.574	-0.247
870	ENSG00000151687.10	ANKAR	chr2	+	190569748	190569950	190554252	190554690	190571663	190571872	870	16,16,21,20	0,4,5,1	10,20	0,0	301	99	8.98419e-05	0.00874266	1.0,0.568,0.58,0.868	1.0,1.0	-0.246
16380	ENSG00000136754.12	ABI1	chr10	-	27044583	27044670	27040526	27040712	27047990	27048164	16380	132,140,105,113	12,16,33,41	158,160	2,3	186	99	3.38436e-11	4.94006e-08	0.854,0.823,0.629,0.595	0.977,0.966	-0.246
69241	ENSG00000144674.12	GOLGA4	chr3	+	37402733	37402796	37396591	37396678	37407570	37408242	69241	64,57,73,103	32,26,28,32	163,148	16,19	162	99	6.2059e-09	4.57599e-06	0.55,0.573,0.614,0.663	0.862,0.826	-0.244
87302	ENSG00000183570.12	PCBP3	chr21	+	47278808	47278917	47278594	47278724	47279615	47279691	87302	6,8,6,13	0,0,2,8	2,1	0,0	208	99	0.000559388	0.0327948	1.0,1.0,0.588,0.436	1.0,1.0	-0.244
34105	ENSG00000237298.4	TTN-AS1	chr2	+	179465284	179465394	179462322	179462408	179497101	179497163	34105	13,9,10,10	4,1,3,0	6,9	0,0	209	99	0.000195598	0.0152562	0.606,0.81,0.612,1.0	1.0,1.0	-0.243
69379	ENSG00000179912.15	R3HDM2	chr12	-	57686354	57686432	57682791	57682823	57689181	57689262	69379	18,17,27,30	9,0,2,10	16,18	0,0	177	99	3.2185e-05	0.00421612	0.528,1.0,0.883,0.627	1.0,1.0	-0.24
77178	ENSG00000100697.10	DICER1	chr14	-	95608019	95608085	95599651	95599840	95623727	95623823	77178	0,1,0,0	2,1,4,1	4,2	4,3	165	99	3.91798e-05	0.00486271	0.0,0.375,0.0,0.0	0.375,0.286	-0.237
82629	ENSG00000165568.13	AKR1E2	chr10	+	4883976	4884049	4881920	4882018	4884612	4884696	82629	7,13,48,30	8,0,6,2	16,24	0,0	172	99	0.000159241	0.0131367	0.335,1.0,0.822,0.896	1.0,1.0	-0.237
46612	ENSG00000076201.10	PTPN23	chr3	+	47446141	47446269	47437632	47437707	47446494	47446571	46612	14,12,9,23	6,2,0,2	10,5	0,0	227	99	0.000148494	0.0124366	0.504,0.724,1.0,0.834	1.0,1.0	-0.235
80260	ENSG00000166323.8	C11orf65	chr11	-	108302472	108302565	108277489	108277690	108332205	108332295	80260	2,3,8,12	0,0,9,2	4,3	0,0	192	99	0.000633704	0.0357735	1.0,1.0,0.314,0.756	1.0,1.0	-0.232
31729	ENSG00000112319.13	EYA4	chr6	+	133777693	133777786	133767767	133767892	133782251	133782318	31729	149,151,113,138	43,25,46,66	127,132	15,9	192	99	2.57965e-06	0.000634045	0.641,0.757,0.559,0.519	0.814,0.883	-0.229
71050	ENSG00000114346.9	ECT2	chr3	+	172473272	172473365	172473084	172473164	172474772	172474799	71050	166,173,78,96	179,168,93,134	275,325	145,119	192	99	1.38385e-10	1.6226e-07	0.323,0.347,0.302,0.27	0.494,0.585	-0.229
39667	ENSG00000177628.11	GBA	chr1	-	155213885	155214021	155209676	155209868	155214296	155214397	39667	24,15,25,15	3,2,0,5	14,22	0,0	235	99	0.000153885	0.0128415	0.771,0.76,1.0,0.558	1.0,1.0	-0.228
33704	ENSG00000168488.14	ATXN2L	chr16	+	28847646	28847811	28847253	28847497	28848048	28848558	33704	32,34,28,50	4,2,11,5	24,34	1,0	264	99	0.000100401	0.00943264	0.75,0.864,0.488,0.789	0.9,1.0	-0.227
33369	ENSG00000176155.14	CCDC57	chr17	-	80136902	80137065	80136349	80136481	80141649	80141808	33369	34,43,15,47	5,1,3,5	15,18	0,0	262	99	0.000155514	0.0128888	0.72,0.942,0.654,0.78	1.0,1.0	-0.226
76382	ENSG00000114956.15	DGUOK	chr2	+	74166036	74166149	74159724	74159810	74185272	74185372	76382	9,10,10,19	3,0,1,4	5,8	0,0	212	99	0.00028566	0.0202093	0.583,1.0,0.824,0.689	1.0,1.0	-0.226
48498	ENSG00000163900.6	TMEM41A	chr3	-	185201092	185201188	185194830	185194935	185206732	185206804	48498	16,13,5,8	0,6,0,3	4,11	0,0	195	99	0.000505771	0.0306545	1.0,0.524,1.0,0.575	1.0,1.0	-0.225
69314	ENSG00000128596.12	CCDC136	chr7	+	128457811	128457918	128452761	128452983	128461852	128462173	69314	0,2,1,1	6,7,19,25	4,8	9,7	206	99	2.42302e-06	0.000601751	0.0,0.121,0.025,0.019	0.176,0.355	-0.224
30279	ENSG00000166348.13	USP54	chr10	-	75366126	75366226	75335893	75336119	75385694	75385711	30279	2,0,0,0	16,7,8,11	9,1	6,10	199	99	3.72206e-05	0.00467867	0.059,0.0,0.0,0.0	0.427,0.047	-0.222
34182	ENSG00000154556.13	SORBS2	chr4	-	186559232	186559316	186556508	186556565	186567821	186567936	34182	1,0,2,1	3,6,5,2	6,6	9,4	183	99	0.000665971	0.0370283	0.153,0.0,0.178,0.213	0.265,0.448	-0.221
65931	ENSG00000166411.9	IDH3A	chr15	+	78449249	78449504	78447554	78447593	78449889	78449973	65931	50,45,107,105	3,1,9,19	12,21	0,0	354	99	7.12692e-05	0.00744154	0.823,0.926,0.769,0.607	1.0,1.0	-0.219
26140	ENSG00000228106.1	RP11-452F19.3	chr1	+	222997225	222997287	222988470	222988513	223008460	223008557	26140	12,15,17,24	4,5,0,3	15,13	0,0	161	99	0.000123833	0.0108943	0.648,0.648,1.0,0.831	1.0,1.0	-0.218
74289	ENSG00000157869.10	RAB28	chr4	-	13371494	13371589	13362977	13363257	13378168	13378246	74289	20,18,8,24	0,7,3,2	23,29	0,1	194	99	0.000607428	0.0347566	1.0,0.568,0.576,0.86	1.0,0.937	-0.218
47962	ENSG00000133114.13	GPALPP1	chr13	+	45603373	45606242	45601919	45602138	45607370	45607737	47962	1015,942,530,620	12,15,9,19	1603,1733	10,7	2968	99	1.63631e-05	0.00253323	0.738,0.677,0.663,0.521	0.842,0.892	-0.217
79895	ENSG00000183696.9	UPP1	chr7	+	48142893	48143008	48141420	48141579	48146469	48146679	79895	29,34,24,30	6,8,2,1	20,9	0,0	214	99	7.76924e-05	0.00792706	0.691,0.663,0.847,0.933	1.0,1.0	-0.216
22203	ENSG00000159023.14	EPB41	chr1	+	29386933	29386996	29379615	29379824	29391493	29391670	22203	127,134,89,102	38,38,38,39	141,126	10,18	162	99	2.72225e-07	0.000100884	0.671,0.683,0.589,0.615	0.896,0.811	-0.214
26534	ENSG00000168785.3	TSPAN5	chr4	-	99407888	99408035	99403155	99403326	99428828	99428879	26534	12,15,79,133	1,3,17,19	17,23	1,0	246	99	0.000124933	0.0109506	0.828,0.668,0.652,0.738	0.872,1.0	-0.214
67213	ENSG00000148357.12	HMCN2	chr9	+	133302883	133303006	133302699	133302762	133304943	133305072	67213	8,4,14,14	0,0,7,3	1,4	0,0	222	99	0.000348959	0.0234686	1.0,1.0,0.471,0.675	1.0,1.0	-0.214
1762	ENSG00000177311.6	ZBTB38	chr3	+	141106282	141106729	141105720	141105779	141122768	141122858	1762	46,50,17,21	30,29,67,48	45,61	22,14	546	99	2.31096e-05	0.00329261	0.218,0.238,0.044,0.073	0.271,0.441	-0.213
8163	ENSG00000237125.4	HAND2-AS1	chr4	+	174480247	174480352	174449750	174449990	174503855	174504029	8163	37,43,96,160	5,2,22,22	73,92	0,0	204	99	4.95529e-10	4.92253e-07	0.782,0.913,0.679,0.779	1.0,1.0	-0.212
36774	ENSG00000125485.13	DDX31	chr9	-	135501050	135501132	135487473	135487642	135505650	135505790	36774	47,45,50,70	14,22,11,20	63,58	7,5	181	99	0.000282849	0.0200899	0.647,0.528,0.713,0.657	0.831,0.864	-0.211
86504	ENSG00000163697.12	APBB2	chr4	-	40937093	40937156	40936630	40936716	40946881	40947087	86504	37,45,33,39	9,13,9,18	50,25	3,3	162	99	0.000378482	0.0249959	0.715,0.679,0.691,0.57	0.911,0.836	-0.21
29898	ENSG00000168772.9	CXXC4	chr4	-	105411900	105413216	105389468	105393523	105415662	105415738	29898	254,219,209,300	6,0,5,10	199,254	0,0	1415	99	4.81311e-06	0.0010185	0.748,1.0,0.745,0.677	1.0,1.0	-0.208
34079	ENSG00000237298.4	TTN-AS1	chr2	+	179406948	179407088	179388018	179388363	179455865	179456041	34079	15,16,13,19	5,0,2,1	10,20	0,0	239	99	0.000338031	0.0229386	0.554,1.0,0.729,0.887	1.0,1.0	-0.208
52183	ENSG00000122203.10	KIAA1191	chr5	-	175786483	175786570	175777615	175777740	175788604	175788764	52183	19,32,17,17	4,7,0,3	8,9	0,0	186	99	0.000191366	0.015008	0.717,0.709,1.0,0.751	1.0,1.0	-0.206
37455	ENSG00000198513.7	ATL1	chr14	+	51096712	51096727	51094748	51095180	51098946	51099786	37455	102,87,60,88	22,21,33,39	96,114	4,13	114	99	2.90174e-07	0.000105425	0.801,0.783,0.612,0.662	0.954,0.884	-0.205
80596	ENSG00000103852.8	TTC23	chr15	-	99781569	99781764	99768737	99768937	99785593	99785715	80596	20,20,47,57	4,0,5,5	23,27	0,0	294	99	9.2066e-05	0.00886262	0.627,1.0,0.76,0.793	1.0,1.0	-0.205
6686	ENSG00000072310.12	SREBF1	chr17	-	17726831	17726921	17723403	17723835	17740040	17740301	6686	17,26,23,26	75,65,71,113	96,88	91,99	189	99	1.60938e-12	4.11104e-09	0.106,0.173,0.145,0.108	0.356,0.318	-0.204
77387	ENSG00000072518.16	MARK2	chr11	+	63673559	63673586	63672257	63672515	63676348	63677051	77387	1,0,0,0	9,8,1,7	2,3	8,6	126	99	0.000512017	0.0308002	0.08,0.0,0.0,0.0	0.164,0.282	-0.203
42807	ENSG00000144233.5	AMMECR1L	chr2	-	128628822	128628933	128624473	128624570	128631401	128631846	42807	50,65,73,55	9,14,8,8	37,41	2,0	210	99	6.93847e-05	0.00731957	0.724,0.686,0.811,0.764	0.897,1.0	-0.202
73568	ENSG00000100211.6	CBY1	chr22	+	39061550	39061690	39052655	39052755	39064021	39064137	73568	57,72,64,84	60,53,66,93	149,104	57,46	239	99	1.76757e-07	7.06276e-05	0.282,0.36,0.287,0.272	0.52,0.484	-0.202
76993	ENSG00000127603.19	MACF1	chr1	+	39893632	39893959	39893126	39893286	39894913	39894998	76993	145,134,108,150	0,3,15,17	174,166	0,0	426	99	2.106e-07	8.01222e-05	1.0,0.912,0.626,0.672	1.0,1.0	-0.198
46003	ENSG00000178950.12	GAK	chr4	-	907394	907456	898424	898567	925830	926008	46003	35,32,30,27	6,2,6,5	53,31	0,0	161	99	1.5761e-06	0.000439142	0.782,0.908,0.755,0.769	1.0,1.0	-0.197
34298	ENSG00000198948.7	MFAP3L	chr4	-	170926730	170927161	170907748	170913460	170947384	170947559	34298	20,13,57,73	0,1,6,2	14,10	0,0	530	99	0.000512853	0.0308247	1.0,0.708,0.64,0.872	1.0,1.0	-0.195
31751	ENSG00000088367.16	EPB41L1	chr20	+	34797409	34797820	34785780	34785963	34800193	34800298	31751	113,144,71,119	7,4,13,3	200,207	3,1	510	99	0.000185775	0.0146984	0.758,0.875,0.515,0.885	0.928,0.976	-0.194
45180	ENSG00000107864.10	CPEB3	chr10	-	93851586	93851701	93841076	93841258	93870832	93870951	45180	21,20,30,48	4,3,0,7	20,21	0,0	214	99	0.000125729	0.01098	0.708,0.755,1.0,0.76	1.0,1.0	-0.194
52441	ENSG00000203805.6	PPAPDC1A	chr10	+	122334642	122334813	122263329	122263438	122348814	122348999	52441	44,37,11,31	1,6,2,1	11,10	0,0	270	99	0.000721039	0.0389219	0.942,0.693,0.669,0.919	1.0,1.0	-0.194
74291	ENSG00000157869.10	RAB28	chr4	-	13371494	13371589	13369347	13370274	13378168	13378246	74291	45,38,17,49	71,73,58,87	58,64	45,51	194	99	2.20294e-06	0.000560722	0.244,0.21,0.13,0.223	0.397,0.39	-0.192
5695	ENSG00000152894.10	PTPRK	chr6	-	128324341	128324377	128319864	128320049	128326228	128326389	5695	36,56,4,2	130,111,40,57	44,28	59,50	135	99	4.29876e-05	0.00522899	0.169,0.27,0.068,0.025	0.354,0.291	-0.189
33243	ENSG00000055483.15	USP36	chr17	-	76793867	76793961	76783462	76783740	76794481	76794633	33243	3,15,10,17	0,0,4,4	6,15	0,0	193	99	0.000584461	0.033931	1.0,1.0,0.562,0.686	1.0,1.0	-0.188
70556	ENSG00000138386.12	NAB1	chr2	+	191514556	191514708	191513958	191514086	191523883	191524202	70556	24,15,14,23	51,42,26,32	48,55	31,43	251	99	3.00106e-06	0.000715492	0.157,0.123,0.175,0.221	0.379,0.335	-0.188
51034	ENSG00000145362.12	ANK2	chr4	+	114293688	114293781	114290669	114290961	114294245	114294329	51034	93,92,47,46	128,96,95,167	112,104	71,84	192	99	1.92113e-06	0.000508913	0.273,0.331,0.203,0.124	0.449,0.39	-0.187
63829	ENSG00000074054.13	CLASP1	chr2	-	122166599	122166623	122165046	122165291	122168441	122168545	63829	40,39,39,51	47,57,65,93	57,53	32,46	123	99	0.000389141	0.0254647	0.407,0.355,0.326,0.306	0.589,0.481	-0.186
3802	ENSG00000109339.14	MAPK10	chr4	-	87320899	87320959	87275682	87275797	87374182	87374333	3802	1,0,0,0	0,2,1,2	11,2	5,3	159	99	2.48165e-05	0.00346675	1.0,0.0,0.0,0.0	0.578,0.293	-0.185
45816	ENSG00000130477.10	UNC13A	chr19	-	17734350	17734356	17732640	17732679	17735637	17735761	45816	27,28,18,19	5,4,6,7	17,21	0,1	105	99	7.68084e-05	0.00787055	0.836,0.868,0.739,0.719	1.0,0.952	-0.185
31350	ENSG00000101333.12	PLCB4	chr20	+	9076933	9076989	9049409	9049550	9288446	9288545	31350	11,13,10,14	2,3,0,3	14,6	0,0	155	99	0.000474713	0.0295797	0.778,0.735,1.0,0.749	1.0,1.0	-0.184
52874	ENSG00000005893.11	LAMP2	chrX	-	119572930	119573148	119565102	119565317	119575584	119575749	52874	344,282,342,426	113,160,194,239	313,350	74,80	317	99	4.63395e-07	0.000157828	0.487,0.355,0.355,0.358	0.569,0.577	-0.184
73306	ENSG00000169507.5	SLC38A11	chr2	-	165801078	165801144	165795959	165796066	165802102	165802237	73306	31,32,7,4	3,4,3,0	4,11	0,0	165	99	0.00077703	0.0410652	0.861,0.828,0.583,1.0	1.0,1.0	-0.182
49833	ENSG00000245937.3	CTC-228N24.3	chr5	-	127412638	127412785	127396835	127396936	127418426	127418573	49833	7,11,24,31	39,27,66,109	22,28	24,25	246	99	2.30176e-06	0.000579688	0.067,0.141,0.128,0.103	0.269,0.311	-0.18
6906	ENSG00000090266.8	NDUFB2	chr7	+	140400669	140400759	140397023	140397191	140402665	140402810	6906	42,49,27,43	1,3,8,12	33,25	0,1	189	99	0.000158666	0.0131045	0.957,0.895,0.639,0.652	1.0,0.929	-0.179
74044	ENSG00000129187.10	DCTD	chr4	-	183837438	183837692	183837033	183837041	183837825	183838406	74044	53,53,90,126	3,2,8,8	24,16	0,0	353	99	0.000167414	0.0135761	0.832,0.881,0.759,0.815	1.0,1.0	-0.178
20308	ENSG00000149187.13	CELF1	chr11	-	47522412	47522484	47521004	47521156	47574543	47574669	20308	27,30,27,47	2,4,13,6	27,35	2,0	171	99	0.000599468	0.0344942	0.887,0.813,0.546,0.819	0.887,1.0	-0.177
56463	ENSG00000112851.10	ERBB2IP	chr5	+	65370851	65371058	65349233	65350779	65372143	65372236	56463	174,198,169,299	47,27,39,33	303,308	20,23	306	99	4.86572e-05	0.00562222	0.545,0.703,0.584,0.746	0.831,0.812	-0.177
3853	ENSG00000093183.9	SEC22C	chr3	-	42605256	42605472	42605014	42605178	42610356	42610565	3853	92,65,72,99	43,47,31,52	113,117	28,31	315	99	0.000221848	0.0167555	0.402,0.303,0.422,0.374	0.559,0.543	-0.176
25457	ENSG00000111237.14	VPS29	chr12	-	110937339	110937351	110933816	110934008	110939853	110939904	25457	167,205,70,49	175,194,152,146	161,150	113,122	111	99	0.000699646	0.038258	0.46,0.485,0.291,0.23	0.56,0.523	-0.175
66988	ENSG00000085978.17	ATG16L1	chr2	+	234182366	234182423	234181611	234181698	234183321	234183424	66988	63,52,35,42	89,78,106,128	87,69	70,70	156	99	1.00655e-05	0.00179225	0.31,0.297,0.173,0.172	0.441,0.385	-0.175
13196	ENSG00000086758.11	HUWE1	chrX	-	53652746	53652989	53652117	53652219	53654360	53654466	13196	140,162,112,214	71,55,91,101	168,186	44,43	342	99	0.000112127	0.0101388	0.363,0.46,0.263,0.38	0.525,0.556	-0.174
20378	ENSG00000115504.10	EHBP1	chr2	+	63215065	63215173	63206322	63206470	63217850	63217975	20378	92,86,51,56	15,16,19,6	95,98	8,4	207	99	0.000652063	0.0365789	0.746,0.72,0.562,0.817	0.85,0.921	-0.174
56397	ENSG00000145725.15	PPIP5K2	chr5	+	102522020	102522140	102520372	102520445	102526542	102526683	56397	61,92,75,123	46,35,35,52	123,143	28,36	219	99	0.000598347	0.0344852	0.375,0.543,0.492,0.517	0.665,0.642	-0.172
20218	ENSG00000198901.9	PRC1	chr15	-	91512308	91512350	91509269	91510432	91512753	91512853	20218	84,75,55,56	185,165,115,160	116,132	130,126	141	99	1.61436e-08	1.03094e-05	0.242,0.242,0.251,0.197	0.385,0.424	-0.171
38808	ENSG00000143507.13	DUSP10	chr1	-	221912275	221913129	221879436	221879808	221915322	221915518	38808	668,623,596,745	16,11,17,36	290,238	3,0	953	99	4.80029e-05	0.00557364	0.813,0.855,0.785,0.683	0.909,1.0	-0.17
4702	ENSG00000122884.8	P4HA1	chr10	-	74803644	74803715	74790024	74790128	74804738	74804809	4702	143,163,47,86	106,123,100,158	175,206	98,124	170	99	0.000597966	0.0344852	0.44,0.436,0.215,0.241	0.51,0.492	-0.168
21232	ENSG00000085733.11	CTTN	chr11	+	70267575	70267686	70266505	70266616	70269045	70269101	21232	621,645,583,724	248,203,133,152	813,794	94,103	210	99	1.22359e-08	8.25622e-06	0.541,0.6,0.674,0.692	0.803,0.784	-0.167
25437	ENSG00000138078.11	PREPL	chr2	-	44586635	44587177	44573406	44573529	44588555	44588700	25437	764,793,323,417	77,114,50,59	742,778	42,58	641	99	3.61234e-06	0.000822832	0.605,0.518,0.499,0.522	0.732,0.674	-0.167
83218	ENSG00000174485.10	DENND4A	chr15	-	65992881	65993010	65989604	65989721	65993388	65993530	83218	21,34,31,30	31,53,54,40	43,66	28,47	228	99	9.77747e-05	0.00924948	0.227,0.218,0.2,0.246	0.4,0.379	-0.167
54865	ENSG00000122008.11	POLK	chr5	+	74830652	74830789	74807893	74808771	74842834	74842982	54865	9,15,6,6	3,3,0,1	11,10	0,1	236	99	0.000688509	0.0378516	0.557,0.677,1.0,0.716	1.0,0.808	-0.166
57293	ENSG00000043143.16	PHF15	chr5	+	133912457	133912728	133909446	133909452	133914186	133915165	57293	35,41,65,91	2,2,6,2	23,22	0,0	370	99	0.000538527	0.0319648	0.824,0.846,0.744,0.924	1.0,1.0	-0.166
20930	ENSG00000168916.11	ZNF608	chr5	-	123974474	123974516	123972607	123973599	123974825	123974907	20930	38,17,33,54	88,80,47,87	47,49	40,57	141	99	0.000815593	0.0424587	0.233,0.13,0.33,0.304	0.452,0.376	-0.165
39008	ENSG00000139116.13	KIF21A	chr12	-	39724043	39724064	39720065	39720126	39724547	39724713	39008	645,728,334,433	130,130,160,217	758,821	90,80	120	99	2.18946e-08	1.34999e-05	0.804,0.822,0.633,0.622	0.874,0.894	-0.164
82026	ENSG00000052795.8	FNIP2	chr4	+	159754952	159755042	159754679	159754780	159756556	159756628	82026	23,32,11,31	97,101,45,72	36,41	59,38	189	99	4.93988e-05	0.00568953	0.11,0.142,0.114,0.184	0.242,0.361	-0.164
6679	ENSG00000115947.9	ORC4	chr2	-	148739496	148739650	148733470	148733544	148779016	148779147	6679	35,12,40,26	2,0,5,4	10,25	0,0	253	99	0.000286989	0.0202572	0.873,1.0,0.758,0.718	1.0,1.0	-0.163
25434	ENSG00000138078.11	PREPL	chr2	-	44586635	44586889	44573406	44573529	44588555	44588700	25434	500,526,228,298	77,114,50,59	530,542	42,58	353	99	7.02232e-07	0.000226245	0.646,0.564,0.561,0.586	0.78,0.724	-0.163
64706	ENSG00000073921.13	PICALM	chr11	-	85701292	85701442	85694908	85695016	85707868	85707972	64706	274,242,238,286	252,291,425,498	370,399	242,231	249	99	2.69744e-10	3.01456e-07	0.302,0.248,0.182,0.186	0.378,0.407	-0.163
64450	ENSG00000250241.1	RP11-9G1.3	chr4	-	134066758	134066900	134063760	134063937	134068353	134068431	64450	34,27,15,24	1,6,1,1	31,19	0,0	241	99	0.000504707	0.0306545	0.933,0.649,0.86,0.908	1.0,1.0	-0.162
7710	ENSG00000172269.12	DPAGT1	chr11	-	118971727	118971757	118971338	118971553	118972204	118972542	7710	35,41,38,55	10,4,6,4	37,37	0,0	129	99	4.16284e-06	0.000922315	0.729,0.887,0.829,0.913	1.0,1.0	-0.16
44641	ENSG00000109083.9	IFT20	chr17	-	26659171	26659408	26658427	26659013	26662365	26662461	44641	106,78,110,150	53,41,39,58	107,138	27,29	336	99	0.000867384	0.0441557	0.371,0.359,0.454,0.432	0.539,0.584	-0.158
66708	ENSG00000006837.7	CDKL3	chr5	-	133647982	133648071	133644264	133644418	133657481	133657594	66708	9,2,19,19	0,0,5,4	2,6	0,0	188	99	0.00050098	0.0304954	1.0,1.0,0.667,0.714	1.0,1.0	-0.155
21075	ENSG00000213625.4	LEPROT	chr1	+	65895613	65895731	65890985	65891061	65897485	65897603	21075	104,70,39,67	2,1,12,5	50,59	0,0	217	99	7.00809e-05	0.0073389	0.96,0.97,0.597,0.859	1.0,1.0	-0.153
39670	ENSG00000177628.11	GBA	chr1	-	155213885	155214024	155209676	155209868	155214296	155214427	39670	33,21,23,37	3,2,0,5	12,29	0,0	238	99	0.000537894	0.0319538	0.821,0.814,1.0,0.755	1.0,1.0	-0.153
81781	ENSG00000127990.11	SGCE	chr7	-	94229008	94229035	94228086	94228275	94229957	94230052	81781	651,610,285,432	73,91,78,120	449,438	18,17	126	99	1.77636e-15	9.77324e-12	0.875,0.84,0.742,0.739	0.951,0.953	-0.153
83710	ENSG00000113810.11	SMC4	chr3	+	160118415	160118753	160117453	160117537	160122115	160122146	83710	126,113,61,48	8,0,3,3	119,153	0,0	437	99	3.11136e-05	0.00411344	0.781,1.0,0.822,0.784	1.0,1.0	-0.153
48535	ENSG00000001497.12	LAS1L	chrX	-	64744443	64744494	64743935	64744142	64744844	64744930	48535	81,74,57,62	121,107,72,110	133,146	112,105	150	99	8.06412e-06	0.00150989	0.306,0.313,0.343,0.271	0.439,0.479	-0.151
58656	ENSG00000133030.15	MPRIP	chr17	+	17083920	17083983	17083316	17083402	17088136	17088874	58656	154,148,279,380	79,48,92,132	208,234	44,36	162	99	1.59544e-05	0.00248069	0.544,0.653,0.65,0.638	0.743,0.799	-0.15
11007	ENSG00000022277.8	RTFDC1	chr20	+	55047381	55047471	55046669	55046725	55048356	55048416	11007	18,30,47,67	5,0,4,12	24,26	1,0	189	99	0.000627048	0.0354818	0.653,1.0,0.86,0.745	0.926,1.0	-0.149
79228	ENSG00000132780.12	NASP	chr1	+	46072992	46074009	46072153	46072263	46078840	46078920	79228	820,733,900,1169	377,394,122,152	2491,2331	299,280	1116	99	0.000394792	0.0257403	0.162,0.142,0.396,0.406	0.425,0.425	-0.149
12325	ENSG00000187239.12	FNBP1	chr9	-	132686122	132686275	132671168	132671278	132687238	132687436	12325	200,226,192,260	24,18,17,18	139,193	2,3	252	99	4.02692e-07	0.000140498	0.766,0.831,0.816,0.85	0.965,0.962	-0.148
43370	ENSG00000169398.15	PTK2	chr8	-	141772466	141772487	141771263	141771361	141774332	141774359	43370	83,70,29,24	188,211,267,390	109,116	236,199	120	99	2.04051e-07	7.84654e-05	0.267,0.215,0.082,0.048	0.276,0.325	-0.147
86698	ENSG00000119640.4	ACYP1	chr14	-	75530172	75530264	75519923	75520362	75535912	75536186	86698	58,51,24,27	0,3,7,2	33,22	0,0	191	99	0.000717054	0.0388107	1.0,0.898,0.64,0.875	1.0,1.0	-0.147
10946	ENSG00000116641.11	DOCK7	chr1	-	63010617	63010710	63009326	63009416	63018402	63018572	10946	57,49,32,44	128,129,92,140	69,71	72,93	192	99	7.3318e-07	0.000235157	0.187,0.164,0.152,0.139	0.331,0.282	-0.146
33242	ENSG00000055483.15	USP36	chr17	-	76792398	76792576	76783547	76783740	76794481	76794537	33242	16,19,31,24	0,0,4,4	24,37	0,0	277	99	0.000783405	0.0412913	1.0,1.0,0.735,0.682	1.0,1.0	-0.146
86777	ENSG00000186230.6	ZNF749	chr19	+	57953252	57953379	57946714	57947035	57954658	57956853	86777	29,35,26,43	5,3,0,8	26,26	0,1	226	99	0.000780744	0.0412018	0.718,0.836,1.0,0.702	1.0,0.919	-0.146
27146	ENSG00000176406.16	RIMS2	chr8	+	104922361	104922429	104897525	104898451	104924280	104924400	27146	43,37,45,77	6,7,3,5	70,64	0,1	167	99	1.20843e-05	0.00205366	0.809,0.758,0.899,0.901	1.0,0.974	-0.145
74048	ENSG00000129187.10	DCTD	chr4	-	183837571	183837692	183837033	183837041	183837825	183838010	74048	46,42,66,103	3,2,8,8	13,9	0,0	220	99	0.000465046	0.029126	0.873,0.904,0.788,0.853	1.0,1.0	-0.145
42478	ENSG00000151470.8	C4orf33	chr4	+	130030461	130030513	130027741	130027802	130030627	130030827	42478	90,69,65,68	17,19,12,5	119,93	9,2	151	99	0.000168142	0.0135831	0.776,0.704,0.78,0.899	0.897,0.968	-0.143
444	ENSG00000114200.5	BCHE	chr3	-	165547304	165548829	165503932	165504099	165555101	165555250	444	10055,9658,4129,5262	390,389,146,249	7572,7974	155,172	1624	99	1.0295e-09	9.81786e-07	0.611,0.602,0.633,0.563	0.749,0.739	-0.142
28022	ENSG00000123415.10	SMUG1	chr12	-	54581602	54581686	54577437	54577743	54582298	54582741	28022	60,57,44,73	3,9,7,13	55,77	2,2	183	99	0.000509981	0.0307554	0.915,0.774,0.773,0.752	0.937,0.954	-0.142
39349	ENSG00000234773.2	CTD-2666L21.1	chr19	+	12345527	12345639	12305831	12305958	12347904	12348582	39349	15,20,29,42	1,0,3,7	49,45	0,0	211	99	0.000105967	0.00975011	0.876,1.0,0.819,0.738	1.0,1.0	-0.142
78904	ENSG00000138834.8	MAPK8IP3	chr16	+	1794978	1795104	1793335	1793477	1797029	1797276	78904	23,24,19,21	55,38,63,98	18,22	20,24	225	99	0.000609509	0.0348104	0.155,0.217,0.117,0.086	0.284,0.287	-0.142
16951	ENSG00000169084.8	DHRSX	chrX	-	2310394	2310515	2209542	2209644	2326785	2326854	16951	7,16,15,5	57,41,42,48	25,24	45,29	220	99	5.1282e-05	0.00584991	0.052,0.149,0.138,0.045	0.2,0.271	-0.14
34484	ENSG00000058056.4	USP13	chr3	+	179399665	179399791	179370542	179371181	179424721	179424864	34484	48,51,21,33	0,7,1,4	42,57	0,0	225	99	0.000167721	0.0135831	1.0,0.762,0.902,0.784	1.0,1.0	-0.138
25049	ENSG00000154114.8	TBCEL	chr11	+	120907213	120907321	120894780	120894863	120916382	120916532	25049	19,19,32,28	0,0,7,4	16,16	0,0	207	99	0.000597959	0.0344852	1.0,1.0,0.686,0.77	1.0,1.0	-0.136
31942	ENSG00000132676.11	DAP3	chr1	+	155691307	155691409	155679563	155679615	155701146	155701202	31942	71,47,53,57	7,2,2,8	72,60	0,0	201	99	8.28989e-06	0.00154007	0.833,0.92,0.929,0.778	1.0,1.0	-0.135
58038	ENSG00000065457.6	ADAT1	chr16	-	75642121	75642221	75636982	75637069	75646140	75646759	58038	59,59,69,124	6,6,7,7	41,52	0,1	199	99	0.000119032	0.0106216	0.83,0.83,0.831,0.898	1.0,0.963	-0.134
75538	ENSG00000157954.10	WIPI2	chr7	+	5232748	5232802	5229818	5230124	5239206	5239289	75538	49,36,39,25	71,79,87,101	62,64	63,85	153	99	0.000607108	0.0347566	0.309,0.228,0.225,0.138	0.389,0.328	-0.134
48987	ENSG00000182168.10	UNC5C	chr4	-	96143360	96143417	96141135	96141327	96163579	96163744	48987	305,253,232,325	39,30,36,53	330,398	8,16	156	99	6.38634e-12	1.34346e-08	0.832,0.843,0.804,0.796	0.963,0.94	-0.133
29610	ENSG00000107731.8	UNC5B	chr10	+	73048714	73048747	73048324	73048489	73050671	73050866	29610	103,103,155,176	32,41,67,88	152,117	23,33	132	99	0.000846398	0.0434533	0.707,0.653,0.634,0.6	0.832,0.727	-0.131
51543	ENSG00000198814.8	GK	chrX	+	30745582	30745669	30742217	30742298	30746848	30747366	51543	75,60,59,68	3,12,5,7	120,101	4,0	186	99	9.4657e-05	0.00905179	0.93,0.727,0.863,0.838	0.941,1.0	-0.131
57113	ENSG00000117335.14	CD46	chr1	+	207963597	207963690	207958963	207959027	207966863	207967218	57113	379,381,556,759	450,486,580,739	663,596	399,400	192	99	6.00203e-08	3.00202e-05	0.303,0.288,0.331,0.346	0.461,0.434	-0.131
76370	ENSG00000116731.18	PRDM2	chr1	+	14104912	14109326	14075855	14075982	14142921	14143065	76370	812,898,1021,1406	3,3,4,8	732,790	0,1	4513	99	0.000318085	0.0218757	0.856,0.868,0.848,0.794	1.0,0.945	-0.131
14433	ENSG00000198130.10	HIBCH	chr2	-	191073605	191073639	191069359	191069958	191077681	191077801	14433	182,161,73,109	14,15,27,35	179,193	9,16	133	99	0.000667924	0.0370383	0.906,0.889,0.668,0.699	0.937,0.9	-0.128
69381	ENSG00000179912.15	R3HDM2	chr12	-	57686354	57686450	57682791	57682823	57689181	57689290	69381	45,36,77,90	9,0,2,10	25,39	0,0	195	99	0.000132771	0.0114139	0.717,1.0,0.951,0.82	1.0,1.0	-0.128
80638	ENSG00000144935.10	TRPC1	chr3	+	142499675	142499871	142467099	142467302	142521010	142521186	80638	72,46,36,64	2,6,0,4	39,40	0,0	295	99	0.000499672	0.0304937	0.924,0.72,1.0,0.843	1.0,1.0	-0.128
20217	ENSG00000198901.9	PRC1	chr15	-	91512308	91512350	91509269	91510432	91512676	91512853	20217	198,177,110,116	211,207,115,131	239,278	153,188	141	99	3.35898e-05	0.00436021	0.397,0.375,0.402,0.383	0.523,0.509	-0.127
52866	ENSG00000053254.11	FOXN3	chr14	-	89952912	89953015	89878277	89878834	90085371	90085481	52866	35,24,48,53	0,4,3,9	32,38	1,0	202	99	0.000704238	0.038421	1.0,0.746,0.887,0.743	0.94,1.0	-0.126
64705	ENSG00000073921.13	PICALM	chr11	-	85701292	85701421	85694908	85695016	85707868	85707972	64705	141,154,121,168	252,291,425,498	215,211	242,231	228	99	1.22378e-10	1.45883e-07	0.195,0.187,0.11,0.128	0.278,0.284	-0.126
76835	ENSG00000186815.8	TPCN1	chr12	+	113722522	113722576	113722385	113722442	113723693	113723766	76835	30,42,41,65	7,2,4,3	93,108	1,0	153	99	2.14924e-05	0.00315004	0.735,0.931,0.869,0.933	0.984,1.0	-0.125
80636	ENSG00000144935.10	TRPC1	chr3	+	142496473	142496605	142467099	142467302	142521010	142521186	80636	44,45,25,47	2,6,0,4	27,20	0,0	231	99	0.000583503	0.0339029	0.904,0.763,1.0,0.834	1.0,1.0	-0.125
33252	ENSG00000196914.4	ARHGEF12	chr11	+	120280102	120280159	120278446	120278532	120291461	120291560	33252	136,118,60,100	177,176,175,223	139,146	149,145	156	99	0.000171499	0.0137669	0.328,0.298,0.179,0.222	0.372,0.39	-0.124
529	ENSG00000198561.8	CTNND1	chr11	+	57573932	57573950	57573353	57573507	57574386	57574455	529	16,7,7,9	112,111,91,128	15,27	68,78	117	99	3.72402e-06	0.000842901	0.108,0.051,0.061,0.056	0.157,0.227	-0.123
26247	ENSG00000145730.16	PAM	chr5	+	102309819	102310140	102296861	102296933	102325975	102326105	26247	1197,1231,1293,1699	120,122,207,303	795,884	61,61	420	99	0.000124911	0.0109506	0.702,0.704,0.596,0.569	0.754,0.774	-0.121
35796	ENSG00000215041.5	NEURL4	chr17	-	7230483	7230549	7230029	7230328	7230758	7230819	35796	67,104,44,92	11,13,2,7	38,60	1,0	165	99	2.0299e-05	0.00299973	0.785,0.828,0.93,0.887	0.958,1.0	-0.121
15259	ENSG00000007255.6	TRAPPC6A	chr19	-	45668384	45668452	45667982	45668228	45681350	45681469	15259	82,77,138,170	14,11,22,32	130,154	11,7	167	99	0.000177108	0.014122	0.776,0.806,0.788,0.759	0.875,0.929	-0.12
30989	ENSG00000115677.12	HDLBP	chr2	-	242208368	242208520	242207891	242207956	242208615	242208688	30989	68,61,59,131	3,1,3,15	60,101	0,0	251	99	6.81627e-06	0.00134305	0.899,0.96,0.886,0.775	1.0,1.0	-0.12
59806	ENSG00000132970.8	WASF3	chr13	+	27250685	27250861	27246008	27246126	27255190	27255457	59806	27,32,46,67	0,2,2,7	35,52	0,0	275	99	0.000384867	0.0252775	1.0,0.852,0.892,0.775	1.0,1.0	-0.12
77167	ENSG00000100697.10	DICER1	chr14	-	95600697	95600840	95599651	95599840	95606995	95607096	77167	11,6,19,35	30,53,76,101	42,46	61,69	242	99	8.25777e-06	0.00154007	0.13,0.044,0.093,0.124	0.22,0.214	-0.119
83675	ENSG00000109332.15	UBE2D3	chr4	-	103748748	103748898	103747641	103747793	103749100	103749186	83675	618,602,764,1036	131,90,165,278	651,598	64,80	249	99	1.47586e-05	0.00237302	0.652,0.727,0.648,0.597	0.802,0.748	-0.119
48525	ENSG00000167081.12	PBX3	chr9	+	128677964	128678206	128510460	128510902	128691933	128692124	48525	346,311,429,552	36,48,29,61	400,419	20,23	341	99	0.000418616	0.0268771	0.736,0.653,0.811,0.724	0.853,0.841	-0.116
53030	ENSG00000146373.12	RNF217	chr6	+	125366356	125366590	125283690	125284572	125379087	125379252	53030	93,83,55,53	5,4,1,2	32,45	0,0	333	99	0.000856468	0.043787	0.847,0.861,0.942,0.887	1.0,1.0	-0.116
84294	ENSG00000152556.11	PFKM	chr12	+	48529073	48529166	48528725	48528821	48531503	48531598	84294	826,745,845,1178	272,193,265,352	814,881	129,166	192	99	9.76648e-07	0.000299802	0.61,0.666,0.622,0.633	0.765,0.732	-0.116
56450	ENSG00000171208.5	NETO2	chr16	-	47120136	47120250	47111613	47117712	47143393	47143622	56450	373,333,280,358	69,66,24,24	210,251	13,11	213	99	0.000225719	0.0169708	0.715,0.701,0.844,0.874	0.882,0.914	-0.115
67214	ENSG00000148357.12	HMCN2	chr9	+	133303744	133303876	133302699	133302762	133304943	133305072	67214	8,6,39,35	0,0,7,3	1,5	0,0	231	99	0.000841405	0.043344	1.0,1.0,0.705,0.833	1.0,1.0	-0.115
25433	ENSG00000138078.11	PREPL	chr2	-	44586635	44586889	44573406	44573529	44588518	44588945	25433	537,564,263,326	213,228,108,161	568,575	146,160	353	99	8.59509e-05	0.0084677	0.414,0.41,0.406,0.362	0.522,0.502	-0.114
8831	ENSG00000078304.15	PPP2R5C	chr14	+	102384167	102384284	102375925	102376027	102391477	102391644	8831	156,177,105,161	24,20,3,3	138,118	2,1	216	99	1.73424e-05	0.00264733	0.749,0.802,0.941,0.961	0.969,0.982	-0.112
28536	ENSG00000197223.7	C1D	chr2	-	68280192	68280418	68274304	68274451	68290076	68290114	28536	33,41,36,30	79,62,41,48	47,72	42,52	325	99	0.000188184	0.0148071	0.113,0.168,0.211,0.16	0.254,0.297	-0.112
55089	ENSG00000137497.13	NUMA1	chr11	-	71723446	71723488	71721831	71721900	71723940	71727306	55089	161,150,72,90	257,282,179,327	173,187	234,232	141	99	0.000106057	0.00975011	0.305,0.272,0.22,0.162	0.342,0.361	-0.112
20278	ENSG00000168066.16	SF1	chr11	-	64534371	64534551	64532077	64532990	64534663	64534718	20278	115,114,93,114	10,4,5,6	168,147	1,2	279	99	0.000101404	0.00948081	0.803,0.91,0.868,0.871	0.984,0.963	-0.111
65616	ENSG00000111371.11	SLC38A1	chr12	-	46648596	46648719	46636982	46637097	46662308	46662780	65616	28,54,59,79	137,153,297,420	66,73	149,101	222	99	2.56929e-08	1.52381e-05	0.084,0.136,0.081,0.077	0.165,0.244	-0.11
40650	ENSG00000008294.16	SPAG9	chr17	-	49053223	49053262	49052131	49052308	49054468	49054582	40650	223,196,139,187	202,189,188,255	252,238	204,154	138	99	0.000938089	0.0465297	0.442,0.427,0.347,0.345	0.47,0.526	-0.108
53932	ENSG00000167508.6	MVD	chr16	-	88727155	88727249	88726927	88727045	88729418	88729556	53932	17,25,33,53	0,0,5,7	8,22	0,0	193	99	0.000950782	0.0468023	1.0,1.0,0.772,0.795	1.0,1.0	-0.108
57823	ENSG00000133460.15	SLC2A11	chr22	+	24219571	24220056	24219228	24219358	24224645	24224833	57823	40,47,50,94	40,38,55,86	75,60	32,33	584	99	0.00056227	0.0329368	0.145,0.173,0.134,0.156	0.284,0.236	-0.108
25436	ENSG00000138078.11	PREPL	chr2	-	44586635	44587177	44573406	44573529	44588518	44588633	25436	808,839,348,429	213,228,108,161	787,806	146,160	641	99	0.00012046	0.0107162	0.369,0.362,0.332,0.292	0.454,0.438	-0.107
57004	ENSG00000024526.12	DEPDC1	chr1	-	68947728	68948580	68947122	68947295	68949632	68949773	57004	254,241,211,234	105,77,57,60	477,425	89,78	951	99	0.000112653	0.0101479	0.201,0.246,0.278,0.289	0.358,0.362	-0.106
66326	ENSG00000173933.15	RBM4	chr11	+	66410920	66410999	66407170	66407594	66413497	66413940	66326	554,504,468,661	92,104,160,236	458,448	67,69	178	99	0.00100752	0.0486247	0.77,0.729,0.619,0.609	0.792,0.783	-0.106
22084	ENSG00000100209.5	HSCB	chr22	+	29140602	29140697	29139869	29139966	29147228	29147276	22084	85,94,38,92	6,7,4,2	90,97	0,1	194	99	8.16547e-05	0.00821417	0.878,0.873,0.829,0.959	1.0,0.98	-0.105
11840	ENSG00000075413.13	MARK3	chr14	+	103964838	103964865	103957875	103958371	103966492	103966537	11840	129,138,78,77	17,10,9,27	187,218	12,9	126	99	0.000291051	0.0204491	0.856,0.916,0.872,0.691	0.924,0.95	-0.103
42733	ENSG00000064042.13	LIMCH1	chr4	+	41640948	41640984	41621204	41621457	41646516	41646643	42733	236,221,138,195	25,22,20,35	203,236	9,8	135	99	1.28735e-06	0.000369784	0.874,0.88,0.835,0.803	0.943,0.956	-0.102
53013	ENSG00000213865.3	C8orf44	chr8	+	67589876	67590189	67579852	67579936	67590453	67590535	53013	30,22,75,103	0,0,2,11	21,22	0,0	412	99	0.000866175	0.0441256	1.0,1.0,0.9,0.692	1.0,1.0	-0.102
53052	ENSG00000076685.14	NT5C2	chr10	-	104865114	104865138	104860991	104861083	104865462	104865558	53052	19,21,32,41	75,82,185,235	30,33	61,98	123	99	0.000755946	0.0402593	0.169,0.171,0.122,0.123	0.284,0.213	-0.102
74192	ENSG00000164211.8	STARD4	chr5	-	110837659	110837786	110835844	110836814	110842027	110842077	74192	1902,1671,915,1207	195,194,115,163	1734,1761	98,98	226	99	3.31269e-10	3.58995e-07	0.81,0.79,0.777,0.764	0.886,0.887	-0.101
12492	ENSG00000166266.9	CUL5	chr11	+	107974916	107975629	107969132	107969256	107976933	107977579	12492	1421,1298,840,1067	27,16,18,22	1198,1169	5,4	812	99	9.89932e-08	4.37061e-05	0.865,0.908,0.851,0.855	0.967,0.973	-0.1
35221	ENSG00000117114.15	LPHN2	chr1	+	82452584	82452713	82450942	82451039	82452943	82453025	35221	16,15,9,14	58,81,40,38	28,25	44,47	228	99	0.000425198	0.0271568	0.107,0.074,0.089,0.138	0.216,0.188	-0.1
41945	ENSG00000167110.12	GOLGA2	chr9	-	131035063	131035144	131030698	131030803	131036128	131036132	41945	72,45,30,40	121,129,118,165	78,64	109,110	180	99	0.000313577	0.0216489	0.247,0.161,0.123,0.118	0.282,0.242	-0.1
63582	ENSG00000072682.14	P4HA2	chr5	-	131533898	131533964	131531104	131531173	131534571	131534625	63582	47,35,39,41	4,2,2,3	54,67	0,0	165	99	0.000712864	0.0387029	0.876,0.913,0.921,0.891	1.0,1.0	-0.1
84387	ENSG00000075711.16	DLG1	chr3	-	196888510	196888609	196876613	196876667	196921295	196921460	84387	101,96,67,65	134,153,147,156	104,104	97,129	198	99	0.000747203	0.0398828	0.274,0.239,0.186,0.172	0.349,0.287	-0.1
2439	ENSG00000126777.13	KTN1	chr14	+	56130672	56130759	56127991	56128330	56133958	56134048	2439	613,513,463,554	249,255,266,284	1017,1020	357,318	186	99	0.000129309	0.011197	0.567,0.517,0.481,0.509	0.603,0.631	-0.099
16570	ENSG00000196924.10	FLNA	chrX	-	153585618	153585642	153583192	153583440	153585801	153585991	16570	493,463,349,512	91,106,156,196	394,410	56,80	123	99	0.000763259	0.0405546	0.813,0.779,0.643,0.678	0.85,0.805	-0.099
35222	ENSG00000117114.15	LPHN2	chr1	+	82452584	82452713	82450942	82451039	82452972	82453025	35222	16,15,9,15	97,80,47,81	29,23	45,70	228	99	0.000167376	0.0135761	0.067,0.075,0.077,0.074	0.219,0.125	-0.099
40907	ENSG00000157693.10	C9orf91	chr9	+	117396047	117396158	117390380	117390530	117399269	117399350	40907	93,76,75,100	6,6,5,5	65,46	0,1	210	99	0.000341409	0.0230675	0.88,0.857,0.876,0.904	1.0,0.956	-0.099
55962	ENSG00000142192.16	APP	chr21	-	27369674	27369731	27354656	27354790	27372329	27372497	55962	1410,1442,1062,1369	1577,1602,1204,1789	1283,1337	1002,1018	156	99	1.00594e-05	0.00179225	0.362,0.364,0.359,0.327	0.448,0.455	-0.099
64945	ENSG00000124406.12	ATP8A1	chr4	-	42596305	42596379	42590276	42590346	42602494	42602535	64945	101,91,102,139	12,15,11,15	190,196	13,6	173	99	0.000968575	0.0473846	0.828,0.776,0.841,0.841	0.893,0.949	-0.099
22082	ENSG00000100209.5	HSCB	chr22	+	29140602	29140692	29139869	29139966	29147228	29147276	22082	87,96,43,89	6,7,4,2	90,98	0,1	189	99	9.18617e-05	0.00885487	0.884,0.878,0.849,0.959	1.0,0.981	-0.098
14069	ENSG00000169855.15	ROBO1	chr3	-	78742497	78742506	78737797	78737922	78763546	78763674	14069	229,225,129,189	8,7,24,37	109,133	2,0	108	99	7.92081e-08	3.75184e-05	0.963,0.967,0.831,0.824	0.98,1.0	-0.094
17246	ENSG00000127054.14	CPSF3L	chr1	-	1255835	1256473	1250899	1250998	1259960	1260001	17246	305,272,211,429	8,4,3,9	338,360	0,3	737	99	0.000790216	0.0415436	0.837,0.901,0.904,0.865	1.0,0.942	-0.094
51695	ENSG00000113163.11	COL4A3BP	chr5	-	74695134	74695212	74685416	74685512	74696029	74696122	51695	82,89,41,66	410,453,223,327	90,72	194,186	177	99	9.8627e-08	4.37061e-05	0.101,0.099,0.093,0.101	0.206,0.178	-0.093
61733	ENSG00000233922.1	AL133493.2	chr21	+	47015486	47015575	47013591	47013622	47016304	47017005	61733	13,8,8,10	23,53,84,128	15,12	30,30	188	99	0.000642025	0.0360724	0.229,0.074,0.048,0.04	0.208,0.174	-0.093
26817	ENSG00000143774.12	GUK1	chr1	+	228328824	228328989	228327965	228328064	228333211	228333325	26817	600,577,406,588	513,484,488,755	624,665	359,509	264	99	7.23596e-05	0.0075334	0.305,0.309,0.238,0.226	0.395,0.329	-0.092
34489	ENSG00000058056.4	USP13	chr3	+	179418795	179418917	179370542	179371181	179424721	179424864	34489	100,87,33,50	0,7,1,4	108,83	0,0	221	99	0.000511841	0.0308002	1.0,0.848,0.937,0.848	1.0,1.0	-0.092
61149	ENSG00000108852.10	MPP2	chr17	-	41961451	41961523	41960570	41960723	41975629	41975748	61149	2,1,0,0	31,34,23,26	7,8	31,44	171	99	4.09264e-06	0.000911908	0.036,0.017,0.0,0.0	0.116,0.095	-0.092
61378	ENSG00000148090.7	AUH	chr9	-	93978340	93978388	93976096	93976707	93979558	93979609	61378	110,110,112,114	23,11,4,0	105,128	1,1	147	99	7.47046e-06	0.00143188	0.763,0.871,0.95,1.0	0.986,0.989	-0.092
78509	ENSG00000161533.7	ACOX1	chr17	-	73969705	73969866	73956295	73956456	73974614	73974774	78509	31,43,33,47	123,93,74,105	49,49	61,68	260	99	0.00034502	0.0232392	0.088,0.15,0.145,0.146	0.234,0.215	-0.092
41672	ENSG00000105323.12	HNRNPUL1	chr19	+	41811736	41811772	41809876	41810166	41812353	41812934	41672	107,93,49,102	10,12,6,4	97,121	2,2	135	99	0.000135604	0.0116016	0.887,0.85,0.857,0.949	0.973,0.978	-0.09
62649	ENSG00000151490.9	PTPRO	chr12	+	15713126	15713210	15710388	15710457	15718526	15718562	62649	547,571,295,357	39,27,34,49	279,329	7,12	183	99	1.8721e-05	0.00279757	0.884,0.92,0.824,0.798	0.956,0.937	-0.09
66327	ENSG00000173933.15	RBM4	chr11	+	66410920	66411611	66406405	66407594	66413497	66413923	66327	3348,3237,3065,4402	92,104,160,236	2947,3025	67,69	790	99	6.92546e-05	0.00731957	0.82,0.796,0.706,0.7	0.846,0.846	-0.09
21074	ENSG00000213625.4	LEPROT	chr1	+	65895544	65895731	65890985	65891061	65897485	65901690	21074	214,177,112,171	2,1,12,5	142,161	0,0	286	99	0.000105264	0.00972724	0.974,0.984,0.764,0.922	1.0,1.0	-0.089
83954	ENSG00000109756.4	RAPGEF2	chr4	+	160265187	160265211	160264432	160264556	160266257	160266481	83954	211,176,73,116	30,37,12,21	133,148	10,12	123	99	0.000915081	0.0457239	0.85,0.793,0.83,0.816	0.915,0.908	-0.089
13397	ENSG00000172819.12	RARG	chr12	-	53625174	53625334	53624951	53625019	53625757	53625976	13397	2,2,0,0	15,23,5,8	9,3	16,29	259	99	0.000709526	0.0385918	0.048,0.032,0.0,0.0	0.177,0.038	-0.087
29074	ENSG00000197965.7	MPZL1	chr1	+	167745300	167745403	167742472	167742605	167757056	167757249	29074	849,868,828,1066	101,93,147,183	854,865	73,62	202	99	8.84575e-06	0.0016145	0.805,0.821,0.734,0.741	0.851,0.872	-0.086
52279	ENSG00000073712.9	FERMT2	chr14	-	53327731	53327752	53327058	53327183	53331118	53331340	52279	69,107,51,73	792,899,648,833	157,157	645,743	120	99	5.29576e-13	1.57823e-09	0.067,0.089,0.061,0.067	0.167,0.148	-0.086
80534	ENSG00000068903.15	SIRT2	chr19	-	39389018	39389065	39384458	39384507	39390145	39390351	80534	21,30,18,16	176,136,45,63	43,28	92,70	146	99	0.000601161	0.0345084	0.075,0.13,0.213,0.147	0.241,0.213	-0.086
80891	ENSG00000078018.15	MAP2	chr2	+	210569173	210569344	210565000	210565062	210570303	210570414	80891	337,342,306,416	381,437,391,505	409,435	323,346	270	99	5.04415e-05	0.00577654	0.245,0.223,0.223,0.232	0.317,0.316	-0.086
7567	ENSG00000163322.9	FAM175A	chr4	-	84393374	84393441	84391355	84391549	84397795	84397832	7567	102,102,95,110	11,3,4,8	182,161	2,0	166	99	3.32344e-06	0.000774286	0.847,0.953,0.934,0.891	0.982,1.0	-0.085
23738	ENSG00000157326.14	DHRS4	chr14	+	24429110	24429212	24424243	24424421	24436419	24436475	23738	112,83,125,157	12,7,0,4	97,117	0,1	201	99	0.000136831	0.0116647	0.821,0.854,1.0,0.951	1.0,0.983	-0.085
30683	ENSG00000162086.10	ZNF75A	chr16	+	3358312	3358836	3355405	3355643	3361752	3361948	30683	385,399,329,494	3,6,10,10	290,373	0,2	623	99	0.000133581	0.011456	0.953,0.914,0.839,0.887	1.0,0.967	-0.085
58749	ENSG00000051341.9	POLQ	chr3	-	121248491	121248639	121240849	121240996	121251836	121252056	58749	103,88,35,30	7,5,1,0	98,84	0,0	247	99	0.000168114	0.0135831	0.855,0.876,0.933,1.0	1.0,1.0	-0.084
66785	ENSG00000138777.15	PPA2	chr4	-	106377852	106377902	106374754	106374799	106395050	106395216	66785	187,169,250,344	20,23,32,57	256,233	6,24	149	99	0.000357841	0.0239422	0.861,0.83,0.838,0.8	0.966,0.866	-0.084
45039	ENSG00000124831.14	LRRFIP1	chr2	+	238659842	238659914	238657841	238657967	238661951	238662122	45039	31,31,22,20	224,259,250,309	62,59	237,200	171	99	1.07375e-09	1.01051e-06	0.074,0.065,0.048,0.036	0.132,0.146	-0.083
5936	ENSG00000150787.3	PTS	chr11	+	112100930	112100953	112099316	112099396	112101348	112101405	5936	813,847,622,848	85,63,76,116	606,712	20,20	122	99	1.69975e-13	6.75406e-10	0.886,0.916,0.869,0.856	0.961,0.967	-0.082
55524	ENSG00000124333.10	VAMP7	chrX	+	155125285	155125343	155119120	155119275	155127775	155127913	55524	158,173,80,78	33,17,2,4	182,217	7,4	157	99	8.85677e-05	0.00866582	0.751,0.865,0.962,0.925	0.943,0.972	-0.082
60182	ENSG00000164038.10	SLC9B2	chr4	-	103949903	103950040	103946646	103947748	103952856	103952965	60182	160,237,141,171	10,6,9,5	214,246	1,2	236	99	2.36282e-05	0.00333989	0.87,0.943,0.868,0.935	0.989,0.981	-0.081
76123	ENSG00000145425.5	RPS3A	chr4	+	152022126	152022237	152020780	152020866	152024022	152024231	76123	1220,1223,1218,1424	124,164,139,231	1238,1386	101,84	210	99	9.09656e-07	0.000285361	0.823,0.779,0.805,0.744	0.852,0.886	-0.081
67087	ENSG00000198794.7	SCAMP5	chr15	+	75308933	75309090	75305017	75305146	75310137	75310282	67087	99,117,137,214	3,12,6,2	55,92	1,0	256	99	0.000881252	0.0445685	0.927,0.79,0.898,0.976	0.955,1.0	-0.08
49450	ENSG00000143924.14	EML4	chr2	+	42488260	42488434	42483640	42483770	42490317	42490446	49450	1030,1323,1938,2514	109,124,126,145	998,978	55,28	273	99	2.78899e-05	0.00381414	0.774,0.795,0.848,0.863	0.868,0.927	-0.078
8133	ENSG00000237125.4	HAND2-AS1	chr4	+	174452117	174452229	174449750	174449990	174503855	174504029	8133	234,234,276,433	5,2,22,22	235,259	0,0	211	99	1.926e-08	1.21907e-05	0.956,0.982,0.855,0.902	1.0,1.0	-0.076
30483	ENSG00000087053.14	MTMR2	chr11	-	95599566	95599650	95598764	95598840	95620775	95620848	30483	6,15,2,13	138,130,94,111	17,11	55,63	183	99	9.84668e-05	0.00929067	0.023,0.059,0.011,0.06	0.143,0.086	-0.076
38289	ENSG00000169136.4	ATF5	chr19	+	50432957	50433122	50432478	50432657	50433988	50434285	38289	6,3,1,2	34,30,99,217	5,3	11,18	264	99	0.000578682	0.0337049	0.062,0.036,0.004,0.003	0.146,0.059	-0.076
55898	ENSG00000157540.15	DYRK1A	chr21	+	38802570	38802702	38792626	38792686	38844985	38845017	55898	21,6,10,17	71,64,78,119	18,21	44,58	231	99	0.000846903	0.0434533	0.113,0.039,0.052,0.058	0.149,0.134	-0.076
78454	ENSG00000158545.11	ZC3H18	chr16	+	88677675	88677944	88666198	88666356	88688604	88688796	78454	227,193,272,336	3,6,9,4	279,274	0,0	368	99	2.83992e-05	0.00384701	0.953,0.896,0.89,0.958	1.0,1.0	-0.076
41439	ENSG00000185947.10	ZNF267	chr16	+	31901527	31901571	31896481	31896577	31925796	31925879	41439	16,9,5,8	85,96,122,147	16,15	63,77	143	99	0.00053214	0.0316991	0.115,0.061,0.028,0.036	0.15,0.119	-0.075
324	ENSG00000153956.11	CACNA2D1	chr7	-	81612629	81612650	81611882	81611943	81613950	81614027	324	54,42,12,18	372,399,362,447	47,45	219,278	120	99	7.50281e-07	0.000238503	0.107,0.08,0.027,0.032	0.15,0.118	-0.073
22085	ENSG00000100209.5	HSCB	chr22	+	29141851	29141996	29139869	29139966	29147228	29147276	22085	140,133,116,130	6,7,4,2	135,141	0,1	244	99	0.000282582	0.0200899	0.904,0.885,0.922,0.963	1.0,0.983	-0.073
27818	ENSG00000182872.11	RBM10	chrX	+	47030426	47030657	47028713	47028897	47032526	47032596	27818	436,391,553,587	21,18,13,21	566,540	9,5	330	99	6.32639e-05	0.00687154	0.862,0.867,0.927,0.893	0.95,0.97	-0.073
29427	ENSG00000052841.10	TTC17	chr11	+	43457713	43457884	43436139	43436326	43464874	43465134	29427	302,241,548,879	13,21,15,28	329,342	4,6	270	99	0.000745393	0.0398159	0.895,0.808,0.931,0.92	0.968,0.954	-0.072
75385	ENSG00000064102.10	ASUN	chr12	-	27068934	27069113	27067340	27067465	27070284	27070374	75385	262,221,326,375	8,3,18,31	312,336	5,4	278	99	0.000110245	0.0100066	0.921,0.963,0.866,0.812	0.957,0.968	-0.072
3661	ENSG00000188529.10	SRSF10	chr1	-	24298062	24298113	24292934	24294213	24298339	24298502	3661	191,233,177,268	20,26,14,10	294,281	11,5	150	99	6.97199e-05	0.0073324	0.863,0.855,0.893,0.946	0.946,0.974	-0.071
7728	ENSG00000165119.14	HNRNPK	chr9	-	86588816	86588888	86588200	86588314	86589431	86589504	7728	4149,4094,2892,4040	620,491,663,928	4532,4754	509,560	171	99	0.000155288	0.012885	0.795,0.828,0.716,0.716	0.838,0.831	-0.071
52908	ENSG00000255571.2	LINC00925	chr15	+	89930019	89930133	89921361	89921396	89930661	89930769	52908	2,0,1,0	7,12,2,9	0,9	4,10	213	99	0.000773298	0.0409093	0.117,0.0,0.189,0.0	0.0,0.295	-0.071
82905	ENSG00000154380.12	ENAH	chr1	-	225692692	225692755	225688693	225688772	225695652	225695719	82905	34,40,22,32	691,770,727,928	115,113	704,623	162	99	0	0	0.029,0.031,0.018,0.021	0.091,0.1	-0.071
14820	ENSG00000149294.12	NCAM1	chr11	+	113117089	113117092	113105754	113105886	113126598	113126723	14820	261,299,150,263	32,45,28,46	204,170	11,16	102	99	0.000349735	0.0234877	0.888,0.866,0.839,0.847	0.947,0.912	-0.07
60825	ENSG00000099204.14	ABLIM1	chr10	-	116207638	116207785	116205070	116205162	116211382	116211430	60825	326,279,385,565	11,7,33,40	330,334	5,8	246	99	0.000123398	0.0108831	0.923,0.941,0.824,0.85	0.964,0.944	-0.07
63097	ENSG00000174839.8	DENND6A	chr3	-	57631387	57631483	57627379	57627474	57643406	57643462	63097	77,106,80,101	5,8,0,2	93,88	0,0	195	99	0.000526244	0.0314971	0.887,0.871,1.0,0.962	1.0,1.0	-0.07
2334	ENSG00000196776.10	CD47	chr3	-	107769424	107769449	107765925	107766139	107770785	107770817	2334	96,74,79,88	566,634,798,1130	85,104	433,403	124	99	6.45421e-08	3.14035e-05	0.119,0.085,0.073,0.059	0.135,0.171	-0.069
3035	ENSG00000214944.5	ARHGEF28	chr5	+	73076500	73076570	73072340	73072521	73090226	73090279	3035	78,88,22,29	6,6,0,1	45,39	0,0	169	99	0.000919726	0.0458505	0.884,0.896,1.0,0.944	1.0,1.0	-0.069
4994	ENSG00000163939.14	PBRM1	chr3	-	52658912	52658957	52651277	52651554	52661288	52661386	4994	4,7,5,7	82,79,71,72	14,18	86,79	144	99	0.000753532	0.0401607	0.032,0.057,0.046,0.063	0.101,0.135	-0.069
19441	ENSG00000214595.7	EML6	chr2	+	55179730	55179829	55177786	55177916	55181119	55181293	19441	151,160,92,114	3,4,4,7	99,124	0,0	198	99	0.000421325	0.0270026	0.962,0.952,0.92,0.891	1.0,1.0	-0.069
35223	ENSG00000117114.15	LPHN2	chr1	+	82452584	82452713	82450942	82451039	82456074	82457052	35223	27,24,14,26	164,165,82,100	37,47	111,107	228	99	5.65308e-05	0.00631767	0.067,0.059,0.069,0.101	0.126,0.16	-0.069
44961	ENSG00000151914.13	DST	chr6	-	56327843	56327954	56324928	56325052	56328362	56328562	44961	163,183,111,149	9,14,2,11	170,194	5,1	210	99	0.000664008	0.0369591	0.895,0.86,0.963,0.865	0.941,0.989	-0.069
31289	ENSG00000132423.6	COQ3	chr6	-	99823815	99824058	99819303	99819463	99825261	99825361	31289	470,435,451,563	15,25,19,36	553,593	16,11	342	99	0.0009538	0.0468863	0.901,0.834,0.873,0.819	0.909,0.94	-0.068
46728	ENSG00000138593.4	SECISBP2L	chr15	-	49311614	49311749	49309744	49309825	49319561	49319677	46728	180,163,105,152	2,8,4,4	125,111	0,0	234	99	0.000513843	0.0308582	0.974,0.896,0.917,0.941	1.0,1.0	-0.068
69025	ENSG00000114416.13	FXR1	chr3	+	180688862	180688943	180687945	180688146	180693100	180693192	69025	15,16,26,51	235,221,400,528	72,89	382,357	180	99	2.42356e-11	3.76832e-08	0.034,0.038,0.035,0.05	0.094,0.121	-0.068
26576	ENSG00000164073.5	MFSD8	chr4	-	128861007	128861152	128859937	128859993	128863199	128863313	26576	125,89,110,184	10,2,2,3	133,147	0,1	244	99	0.000600099	0.0345028	0.835,0.948,0.957,0.961	1.0,0.984	-0.067
60824	ENSG00000099204.14	ABLIM1	chr10	-	116207638	116207779	116205070	116205162	116211382	116211430	60824	366,310,433,646	11,7,33,40	440,442	5,8	240	99	6.08171e-06	0.00123576	0.932,0.948,0.844,0.869	0.973,0.958	-0.067
69315	ENSG00000128596.12	CCDC136	chr7	+	128457811	128457918	128455667	128455985	128461852	128462173	69315	0,2,0,1	15,14,26,45	4,8	40,27	206	99	0.0001191	0.0106216	0.0,0.064,0.0,0.011	0.046,0.125	-0.067
71131	ENSG00000082146.8	STRADB	chr2	+	202322101	202322173	202319468	202319575	202323506	202323546	71131	3,5,1,0	63,51,37,33	12,5	47,53	171	99	0.000629773	0.0356078	0.027,0.054,0.015,0.0	0.129,0.052	-0.067
86335	ENSG00000040275.12	SPDL1	chr5	+	169017759	169017833	169015397	169015579	169018051	169018078	86335	8,6,4,21	135,107,85,117	34,36	151,163	173	99	1.23779e-05	0.00207821	0.033,0.031,0.026,0.093	0.114,0.112	-0.067
41670	ENSG00000105323.12	HNRNPUL1	chr19	+	41811550	41811772	41809876	41810166	41812353	41812943	41670	346,330,165,333	10,12,6,4	349,370	2,2	321	99	0.0001232	0.0108831	0.914,0.895,0.895,0.963	0.982,0.983	-0.066
42351	ENSG00000134313.10	KIDINS220	chr2	-	8888016	8888130	8876997	8877129	8890241	8890465	42351	486,541,413,533	15,17,14,36	411,475	3,3	213	99	2.42113e-08	1.46753e-05	0.938,0.937,0.932,0.873	0.985,0.987	-0.066
23591	ENSG00000132694.14	ARHGEF11	chr1	-	156924683	156924713	156921364	156921491	156925494	156925591	23591	106,114,98,164	0,2,14,11	97,92	0,0	129	99	4.46383e-05	0.00538869	1.0,0.978,0.843,0.92	1.0,1.0	-0.065
36824	ENSG00000155906.12	RMND1	chr6	-	151766442	151766960	151757369	151757689	151773150	151773259	36824	838,732,515,679	16,8,8,22	1123,1146	5,11	617	99	0.00027307	0.0196688	0.894,0.936,0.912,0.832	0.973,0.944	-0.065
64139	ENSG00000152818.14	UTRN	chr6	+	145148483	145148522	145142017	145142154	145148746	145148812	64139	219,240,75,108	10,18,8,7	148,164	6,0	138	99	0.000533163	0.0316991	0.94,0.905,0.871,0.917	0.947,1.0	-0.065
61818	ENSG00000128641.13	MYO1B	chr2	+	192265474	192265561	192265107	192265194	192267357	192267444	61818	1026,1123,1319,1570	129,162,138,169	931,966	64,74	186	99	0.000107217	0.00981896	0.809,0.787,0.836,0.832	0.886,0.874	-0.064
64993	ENSG00000051180.12	RAD51	chr15	+	40998374	40998492	40993261	40993399	41001222	41001314	64993	168,173,100,114	5,12,3,2	172,123	0,1	217	99	9.06966e-05	0.00878995	0.939,0.868,0.938,0.963	1.0,0.982	-0.064
76021	ENSG00000101935.5	AMMECR1	chrX	-	109507716	109507827	109459745	109459860	109560826	109560999	76021	254,214,175,291	18,15,8,5	182,225	4,2	210	99	0.000744356	0.0397902	0.869,0.871,0.912,0.965	0.955,0.981	-0.064
455	ENSG00000154814.9	OXNAD1	chr3	+	16313651	16313828	16313165	16313229	16327848	16327955	455	7,2,4,6	48,45,82,66	13,11	40,47	276	99	0.000131611	0.0113277	0.05,0.016,0.017,0.032	0.104,0.077	-0.062
70630	ENSG00000144741.13	SLC25A26	chr3	+	66413283	66413353	66396787	66396832	66419901	66419966	70630	225,156,231,313	26,11,0,3	221,272	1,2	169	99	1.33702e-05	0.00221363	0.835,0.893,1.0,0.984	0.992,0.988	-0.062
73351	ENSG00000134996.11	OSTF1	chr9	+	77732419	77732466	77703458	77703642	77742484	77742535	73351	120,140,82,141	4,7,5,13	89,81	0,2	146	99	0.000475729	0.0295879	0.953,0.931,0.917,0.88	1.0,0.965	-0.062
57140	ENSG00000165802.15	NSMF	chr9	-	140349690	140349759	140348842	140348895	140350862	140350938	57140	556,557,772,1172	86,67,132,217	737,906	72,101	168	99	0.000845761	0.0434533	0.792,0.83,0.775,0.761	0.858,0.841	-0.06
75539	ENSG00000157954.10	WIPI2	chr7	+	5232748	5232976	5229889	5230124	5239206	5239289	75539	27,17,17,15	71,79,87,101	38,30	63,85	327	99	0.000619583	0.0351707	0.103,0.061,0.056,0.043	0.154,0.097	-0.06
5288	ENSG00000084234.12	APLP2	chr11	+	129993506	129993674	129992199	129992408	129996594	129996725	5288	389,450,495,689	753,720,881,1205	496,545	588,681	267	99	0.00023731	0.0175261	0.161,0.188,0.172,0.175	0.238,0.229	-0.059
24272	ENSG00000100722.14	ZC3H14	chr14	+	89034201	89034497	89029944	89030037	89037427	89037468	24272	233,272,310,403	3,6,9,3	287,293	1,0	395	99	0.000391058	0.0255434	0.951,0.919,0.896,0.971	0.986,1.0	-0.059
63028	ENSG00000198952.7	SMG5	chr1	-	156236297	156236469	156235927	156236171	156237260	156237379	63028	709,670,393,421	18,20,7,22	276,312	3,1	271	99	4.74432e-05	0.00555192	0.935,0.924,0.954,0.875	0.971,0.991	-0.059
86334	ENSG00000040275.12	SPDL1	chr5	+	169017756	169017833	169015538	169015579	169018051	169018228	86334	8,10,5,26	135,107,85,117	34,39	151,163	176	99	0.000246027	0.0179927	0.032,0.05,0.032,0.111	0.112,0.119	-0.059
8132	ENSG00000237125.4	HAND2-AS1	chr4	+	174452117	174452229	174449750	174449990	174480247	174480352	8132	144,152,158,250	0,0,12,12	127,153	0,0	211	99	0.000100146	0.0094248	1.0,1.0,0.861,0.907	1.0,1.0	-0.058
63176	ENSG00000104885.13	DOT1L	chr19	+	2191082	2191239	2189730	2189794	2193687	2193782	63176	188,190,112,167	10,8,2,0	164,202	1,0	256	99	0.000225215	0.0169561	0.879,0.902,0.956,1.0	0.984,1.0	-0.058
65246	ENSG00000103222.14	ABCC1	chr16	+	16110352	16110478	16108347	16108485	16126965	16127027	65246	475,473,323,490	21,14,17,11	333,339	2,4	225	99	3.92285e-05	0.00486271	0.909,0.937,0.893,0.951	0.987,0.974	-0.058
82793	ENSG00000104325.2	DECR1	chr8	+	91029529	91029554	91013690	91013789	91031136	91031194	82793	251,244,353,433	25,24,44,52	233,289	14,14	124	99	0.000470867	0.0294391	0.889,0.89,0.865,0.869	0.93,0.943	-0.058
2337	ENSG00000196776.10	CD47	chr3	-	107770785	107770817	107762145	107766139	107776323	107776416	2337	784,851,1062,1474	46,72,140,166	615,587	26,29	131	99	1.64814e-06	0.00045339	0.928,0.899,0.851,0.87	0.947,0.939	-0.056
38438	ENSG00000112078.9	KCTD20	chr6	+	36442565	36442839	36437828	36438034	36446897	36447000	38438	1505,1429,952,1214	59,52,47,71	1610,1661	48,39	373	99	0.000490343	0.0301461	0.871,0.879,0.843,0.819	0.899,0.919	-0.056
65617	ENSG00000111371.11	SLC38A1	chr12	-	46648596	46648719	46636982	46637097	46662647	46662913	65617	28,56,53,82	224,227,197,257	68,76	173,185	222	99	0.00062412	0.0353441	0.053,0.099,0.107,0.125	0.149,0.155	-0.056
78453	ENSG00000158545.11	ZC3H18	chr16	+	88675341	88675459	88666198	88666356	88688604	88688796	78453	159,176,215,284	3,6,9,4	174,184	0,0	217	99	0.000226132	0.0169715	0.96,0.93,0.916,0.97	1.0,1.0	-0.056
67245	ENSG00000112130.12	RNF8	chr6	+	37348925	37349130	37344701	37344809	37358517	37358944	67245	428,372,289,376	18,16,4,12	452,400	4,6	304	99	0.0006908	0.0379484	0.886,0.883,0.959,0.911	0.974,0.956	-0.055
15881	ENSG00000151617.11	EDNRA	chr4	+	148406763	148407253	148402083	148402528	148441002	148441130	15881	618,645,108,110	9,10,1,0	219,183	0,0	589	99	0.000456701	0.0287039	0.92,0.916,0.948,1.0	1.0,1.0	-0.054
65203	ENSG00000099783.7	HNRNPM	chr19	+	8548041	8548095	8539050	8539128	8550486	8550532	65203	1014,1071,832,1040	128,137,85,98	1081,1246	88,66	153	99	3.61048e-05	0.00457865	0.837,0.835,0.864,0.873	0.888,0.924	-0.054
5267	ENSG00000005108.11	THSD7A	chr7	-	11416196	11416284	11409983	11415505	11418696	11418907	5267	195,187,127,200	12,5,6,4	219,199	1,2	187	99	0.000239362	0.0176247	0.896,0.952,0.918,0.964	0.991,0.981	-0.053
8149	ENSG00000237125.4	HAND2-AS1	chr4	+	174457998	174458121	174449750	174449990	174503855	174504029	8149	345,297,448,666	5,2,22,22	438,503	0,0	222	99	5.3843e-09	4.09688e-06	0.969,0.985,0.901,0.931	1.0,1.0	-0.053
5012	ENSG00000033100.10	CHPF2	chr7	+	150934041	150934258	150933493	150933676	150934459	150934679	5012	39,47,20,34	160,204,100,167	44,35	94,93	316	99	0.000606196	0.0347566	0.071,0.067,0.059,0.06	0.128,0.105	-0.052
39000	ENSG00000139116.13	KIF21A	chr12	-	39711874	39712003	39703387	39703568	39713707	39713815	39000	218,234,164,234	12,11,3,2	209,239	1,2	228	99	0.000368031	0.0244638	0.887,0.902,0.96,0.981	0.989,0.981	-0.052
49087	ENSG00000165661.11	QSOX2	chr9	-	139115608	139115699	139110875	139111010	139115852	139115958	49087	172,172,170,228	12,6,4,7	224,263	1,4	190	99	0.000980914	0.0476947	0.882,0.937,0.957,0.944	0.992,0.972	-0.052
11454	ENSG00000131876.12	SNRPA1	chr15	-	101826418	101826498	101825930	101826006	101827112	101827215	11454	1178,1069,735,935	40,40,41,71	1074,1024	18,21	179	99	1.12739e-07	4.85756e-05	0.942,0.937,0.908,0.879	0.971,0.964	-0.051
24562	ENSG00000135316.13	SYNCRIP	chr6	-	86351009	86351169	86350163	86350282	86352514	86352709	24562	1784,1717,1836,2348	150,97,156,197	1695,1979	80,109	259	99	0.000657966	0.0367372	0.82,0.871,0.818,0.82	0.89,0.874	-0.05
26819	ENSG00000143774.12	GUK1	chr1	+	228328824	228329208	228328018	228328064	228333211	228333325	26819	473,445,311,438	513,484,488,755	462,478	359,509	483	99	0.000259759	0.0189196	0.159,0.159,0.116,0.106	0.209,0.161	-0.05
81787	ENSG00000127990.11	SGCE	chr7	-	94259030	94259153	94257513	94257671	94285301	94285410	81787	660,747,342,416	45,35,9,25	459,453	11,11	222	99	0.000717893	0.0388107	0.867,0.905,0.944,0.881	0.949,0.948	-0.049
7720	ENSG00000164116.12	GUCY1A3	chr4	+	156617907	156618001	156588497	156588571	156618086	156618274	7720	187,250,109,153	9,12,0,3	165,160	0,1	193	99	0.00019275	0.0150834	0.914,0.914,1.0,0.963	1.0,0.988	-0.046
27570	ENSG00000164615.3	CAMLG	chr5	+	134076752	134077213	134074190	134074482	134079676	134079742	27570	1922,1716,2383,3367	20,22,51,50	2789,3043	18,17	560	99	2.14021e-06	0.000550634	0.944,0.932,0.892,0.923	0.965,0.969	-0.044
8191	ENSG00000126261.8	UBA2	chr19	+	34920997	34921091	34919256	34919475	34921480	34921564	8191	167,175,109,139	1043,1044,755,903	218,245	922,875	193	99	7.15271e-06	0.00138746	0.076,0.079,0.069,0.073	0.108,0.126	-0.043
12059	ENSG00000111711.5	GOLT1B	chr12	+	21659818	21659910	21654748	21654882	21665228	21665310	12059	259,244,197,286	11,10,4,4	178,207	1,1	191	99	0.000492402	0.0302046	0.924,0.927,0.962,0.974	0.989,0.991	-0.043
80313	ENSG00000162733.12	DDR2	chr1	+	162674841	162674921	162625000	162625164	162688826	162688935	80313	23,20,15,25	210,235,293,334	34,35	198,210	179	99	5.95196e-05	0.00658244	0.057,0.045,0.028,0.04	0.087,0.084	-0.043
18352	ENSG00000108825.13	PTGES3L-AARSD1	chr17	-	41105740	41105795	41103816	41103911	41106892	41106984	18352	453,398,295,493	31,23,13,22	362,374	10,7	154	99	0.000699198	0.038258	0.904,0.918,0.936,0.935	0.959,0.972	-0.042
52367	ENSG00000064726.5	BTBD1	chr15	-	83697367	83697480	83689426	83689514	83698887	83699080	52367	50,60,33,31	446,496,445,535	48,72	297,319	212	99	9.34003e-07	0.000290572	0.05,0.053,0.033,0.026	0.07,0.095	-0.042
5440	ENSG00000121897.9	LIAS	chr4	+	39474719	39474831	39472855	39472926	39478682	39478775	5440	172,142,326,397	6,2,3,13	203,254	0,1	211	99	0.00058232	0.0338886	0.931,0.971,0.981,0.935	1.0,0.992	-0.041
13462	ENSG00000164162.8	ANAPC10	chr4	-	146018646	146018714	146017136	146017263	146019271	146019332	13462	1,5,1,6	127,161,100,121	11,12	118,115	167	99	4.02542e-05	0.00495549	0.005,0.018,0.006,0.029	0.052,0.058	-0.041
63174	ENSG00000104885.13	DOT1L	chr19	+	2191010	2191239	2189730	2189794	2193687	2193782	63174	359,345,223,284	10,8,2,0	314,354	1,0	328	99	0.000681987	0.0376191	0.916,0.929,0.971,1.0	0.99,1.0	-0.041
67241	ENSG00000112130.12	RNF8	chr6	+	37342395	37342485	37339287	37339350	37344701	37344809	67241	241,274,180,320	9,11,4,9	267,304	2,3	189	99	0.000876967	0.0444222	0.933,0.929,0.959,0.949	0.986,0.982	-0.041
82908	ENSG00000154380.12	ENAH	chr1	-	225704897	225705008	225702297	225702602	225706899	225707267	82908	557,544,652,927	31,27,14,26	600,585	11,9	210	99	0.000987635	0.0479268	0.894,0.905,0.956,0.944	0.963,0.968	-0.041
2332	ENSG00000196776.10	CD47	chr3	-	107768465	107768498	107765925	107766139	107770785	107770817	2332	86,78,35,90	566,634,798,1130	66,70	433,403	132	99	0.000115663	0.0103928	0.102,0.084,0.032,0.056	0.103,0.115	-0.04
3637	ENSG00000100532.7	CGRRF1	chr14	+	54989867	54989963	54989171	54989311	54996766	54996944	3637	5,2,0,8	83,100,60,106	8,17	101,100	195	99	0.000529931	0.0316384	0.03,0.01,0.0,0.037	0.039,0.079	-0.04
34336	ENSG00000166925.4	TSC22D4	chr7	-	100074899	100075930	100071410	100072063	100076416	100076792	34336	1347,1253,1446,2102	9,2,3,9	1040,1063	0,0	1130	99	0.00104356	0.0499261	0.929,0.982,0.977,0.953	1.0,1.0	-0.04
53122	ENSG00000102900.8	NUP93	chr16	+	56782145	56782338	56764016	56764123	56792449	56792567	53122	1012,973,820,1183	28,12,4,30	947,1029	2,4	292	99	6.63738e-08	3.20765e-05	0.925,0.965,0.986,0.93	0.994,0.989	-0.04
61133	ENSG00000117868.11	ESYT2	chr7	-	158545471	158545534	158542339	158542414	158552176	158552272	61133	1,0,0,2	89,50,47,98	10,17	164,183	162	99	5.52854e-06	0.00112656	0.007,0.0,0.0,0.012	0.036,0.054	-0.04
72219	ENSG00000011258.11	MBTD1	chr17	-	49286674	49286791	49284248	49284366	49294694	49294777	72219	0,4,2,5	67,48,74,109	8,9	67,61	216	99	0.000491875	0.0301981	0.0,0.037,0.012,0.021	0.052,0.063	-0.04
82791	ENSG00000104325.2	DECR1	chr8	+	91029430	91029554	91013673	91013789	91031136	91031194	82791	730,703,1008,1309	25,24,44,52	735,825	14,14	223	99	0.000235771	0.0174568	0.928,0.929,0.91,0.918	0.959,0.963	-0.04
24185	ENSG00000214827.5	MTCP1	chrX	-	154293893	154294064	154292240	154292308	154298968	154299411	24185	3,1,4,2	50,49,57,95	6,9	43,54	270	99	0.00054192	0.032023	0.022,0.007,0.025,0.008	0.049,0.058	-0.038
31639	ENSG00000049167.9	ERCC8	chr5	-	60187863	60189470	60186715	60186913	60194102	60194227	31639	155,143,169,253	119,108,141,203	289,292	124,163	1706	99	0.000153803	0.0128415	0.07,0.071,0.065,0.067	0.119,0.094	-0.038
39729	ENSG00000197006.9	METTL9	chr16	+	21623965	21624156	21610796	21611219	21629185	21629330	39729	1574,1508,1292,1509	56,41,32,52	1598,1754	28,24	290	99	8.66018e-05	0.00852009	0.906,0.926,0.932,0.908	0.951,0.961	-0.038
41671	ENSG00000105323.12	HNRNPUL1	chr19	+	41811580	41811772	41809876	41810166	41812353	41812830	41671	490,547,303,572	10,12,6,4	549,557	2,2	291	99	0.000278805	0.0199524	0.943,0.939,0.945,0.98	0.989,0.99	-0.038
52771	ENSG00000153140.4	CETN3	chr5	-	89692309	89692381	89689526	89689924	89695174	89695366	52771	17,7,9,19	286,250,252,324	19,53	321,293	171	99	4.6277e-06	0.000993969	0.033,0.016,0.02,0.033	0.033,0.095	-0.038
8148	ENSG00000237125.4	HAND2-AS1	chr4	+	174457998	174458121	174449750	174449990	174480247	174480352	8148	266,216,270,441	0,0,12,12	263,289	0,0	222	99	0.00029571	0.0207154	1.0,1.0,0.909,0.942	1.0,1.0	-0.037
15021	ENSG00000177565.11	TBL1XR1	chr3	-	176782707	176782810	176771560	176771706	176816253	176816329	15021	952,780,980,1225	27,17,46,49	982,935	10,17	202	99	1.39842e-05	0.00228357	0.945,0.957,0.913,0.925	0.98,0.964	-0.037
26311	ENSG00000144401.10	METTL21A	chr2	-	208486529	208486641	208473838	208478167	208488952	208489128	26311	236,255,172,290	4,4,2,13	280,281	0,2	211	99	0.000620085	0.0351712	0.965,0.968,0.976,0.913	1.0,0.985	-0.037
7711	ENSG00000172269.12	DPAGT1	chr11	-	118971727	118971848	118971339	118971553	118972204	118972487	7711	381,416,280,366	10,4,6,4	330,296	0,0	220	99	0.000865794	0.0441256	0.945,0.979,0.955,0.976	1.0,1.0	-0.036
34139	ENSG00000105197.6	TIMM50	chr19	+	39976183	39976242	39973774	39973796	39976327	39976447	34139	543,595,540,679	17,35,19,20	558,613	10,6	158	99	4.1855e-05	0.00510859	0.952,0.914,0.947,0.955	0.972,0.985	-0.036
87303	ENSG00000183570.12	PCBP3	chr21	+	47289121	47289238	47269874	47270009	47316121	47316276	87303	7,0,0,1	72,82,43,61	12,11	105,104	216	99	0.0001297	0.0112172	0.043,0.0,0.0,0.007	0.05,0.046	-0.036
2204	ENSG00000005889.11	ZFX	chrX	+	24193505	24193560	24190872	24190917	24197299	24197667	2204	2,4,2,0	82,76,85,92	12,4	94,100	154	99	0.000713194	0.0387029	0.015,0.033,0.015,0.0	0.076,0.025	-0.035
31111	ENSG00000144681.6	STAC	chr3	+	36527254	36527417	36526468	36526550	36527625	36527741	31111	18,15,14,13	263,258,138,222	27,18	125,144	262	99	0.000104369	0.00968521	0.025,0.021,0.037,0.022	0.075,0.045	-0.034
62227	ENSG00000165521.11	EML5	chr14	-	89100812	89100833	89093989	89094163	89105152	89105251	62227	195,163,90,159	5,1,2,15	161,183	1,1	120	99	0.00100584	0.0485763	0.97,0.993,0.974,0.897	0.993,0.993	-0.034
34860	ENSG00000139218.13	SCAF11	chr12	-	46367972	46369517	46357889	46357971	46384135	46384348	34860	145,134,210,237	167,130,177,192	262,262	146,160	1644	99	0.000216088	0.016477	0.05,0.058,0.067,0.069	0.098,0.09	-0.033
3662	ENSG00000188529.10	SRSF10	chr1	-	24298062	24298116	24291293	24294213	24298339	24298502	3662	417,479,431,519	20,26,14,10	514,496	11,5	153	99	0.000940235	0.0465716	0.931,0.923,0.952,0.971	0.968,0.985	-0.032
63029	ENSG00000198952.7	SMG5	chr1	-	156236331	156236469	156235571	156236171	156237260	156237469	63029	1221,1115,641,734	18,20,7,22	478,536	3,1	237	99	6.22913e-05	0.00682286	0.966,0.959,0.975,0.933	0.985,0.996	-0.032
66784	ENSG00000138777.15	PPA2	chr4	-	106377837	106377902	106374754	106374799	106395050	106395171	66784	571,592,866,1172	20,23,32,57	723,812	6,24	164	99	0.000333945	0.0227045	0.945,0.94,0.942,0.925	0.986,0.953	-0.032
7805	ENSG00000169045.13	HNRNPH1	chr5	-	179046269	179046361	179045145	179045324	179047892	179047960	7805	2043,1891,1541,1896	90,91,66,80	2556,2747	67,68	191	99	3.52647e-05	0.00450778	0.922,0.915,0.924,0.925	0.952,0.954	-0.031
10552	ENSG00000171862.5	PTEN	chr10	+	89685269	89685314	89653781	89653866	89690802	89690846	10552	776,695,774,924	27,34,16,54	916,936	11,21	144	99	2.07573e-05	0.00305482	0.952,0.934,0.971,0.922	0.983,0.968	-0.031
87399	ENSG00000167965.13	MLST8	chr16	+	2256743	2256930	2256497	2256660	2257035	2257111	87399	14,13,2,8	180,186,188,227	19,28	184,151	286	99	4.78745e-06	0.00101608	0.026,0.024,0.004,0.012	0.035,0.06	-0.031
82789	ENSG00000104325.2	DECR1	chr8	+	91029351	91029554	91013632	91013789	91031136	91031194	82789	1451,1385,2060,2672	25,24,44,52	1691,1765	14,14	302	99	3.23124e-05	0.00421735	0.95,0.95,0.939,0.944	0.975,0.976	-0.03
62638	ENSG00000151490.9	PTPRO	chr12	+	15650178	15650337	15636907	15637181	15652375	15652528	62638	1044,1022,526,732	10,20,2,10	613,581	0,0	258	99	6.89173e-05	0.00731341	0.976,0.951,0.99,0.966	1.0,1.0	-0.029
78197	ENSG00000090263.11	MRPS33	chr7	-	140710218	140710417	140705968	140706335	140714710	140714766	78197	1048,984,1468,1844	0,0,33,34	1205,1242	0,0	298	99	4.58763e-08	2.43056e-05	1.0,1.0,0.937,0.947	1.0,1.0	-0.029
21828	ENSG00000120137.6	PANK3	chr5	-	168005638	168005712	167995650	167996003	168006260	168006355	21828	11,20,18,17	510,547,482,670	36,42	444,527	173	99	1.80548e-07	7.13454e-05	0.012,0.02,0.021,0.014	0.044,0.044	-0.027
59768	ENSG00000075043.13	KCNQ2	chr20	-	62073758	62073884	62070950	62071061	62076011	62076187	59768	511,497,484,730	5,4,12,11	741,788	1,2	225	99	0.000213254	0.0162957	0.978,0.982,0.947,0.967	0.997,0.994	-0.027
78200	ENSG00000090263.11	MRPS33	chr7	-	140710218	140710460	140705853	140706335	140714710	140714783	78200	1372,1278,1836,2254	0,0,33,34	1612,1663	0,0	341	99	7.78976e-08	3.71436e-05	1.0,1.0,0.942,0.951	1.0,1.0	-0.027
38990	ENSG00000139116.13	KIF21A	chr12	-	39705216	39705355	39703553	39703568	39713707	39713815	38990	499,534,407,420	12,11,3,2	579,539	1,2	238	99	0.000894699	0.0449701	0.945,0.953,0.983,0.989	0.996,0.991	-0.026
48776	ENSG00000172915.14	NBEA	chr13	+	36220005	36220068	36202217	36202385	36220395	36220485	48776	14,9,3,19	616,677,300,396	21,23	283,367	162	99	3.26636e-06	0.000768497	0.014,0.008,0.006,0.028	0.043,0.037	-0.026
53246	ENSG00000136960.8	ENPP2	chr8	-	120584415	120584490	120582944	120583081	120592355	120592407	53246	39,43,10,12	728,853,329,382	65,66	714,746	174	99	9.93352e-06	0.00178779	0.03,0.028,0.017,0.018	0.049,0.048	-0.025
79007	ENSG00000164933.7	SLC25A32	chr8	-	104417003	104417089	104415391	104415552	104419861	104420012	79007	853,928,889,1100	35,36,6,14	755,738	4,11	185	99	0.000631184	0.0356594	0.929,0.932,0.988,0.977	0.99,0.973	-0.025
25687	ENSG00000128595.12	CALU	chr7	+	128387606	128388421	128379345	128379486	128388626	128388858	25687	164,152,171,213	662,601,921,1257	193,186	405,433	914	99	1.84053e-11	2.99469e-08	0.026,0.027,0.02,0.018	0.049,0.044	-0.024
15078	ENSG00000243147.3	MRPL33	chr2	+	27997290	27997397	27995540	27995559	28117399	28117551	15078	494,439,824,1126	4,5,25,15	955,991	7,2	206	99	8.37311e-05	0.00833626	0.983,0.977,0.941,0.973	0.985,0.996	-0.022
15569	ENSG00000160691.14	SHC1	chr1	-	154940679	154940733	154940455	154940507	154940970	154941070	15569	2291,2414,985,1257	75,62,27,47	1315,1418	22,22	153	99	0.00032328	0.0221198	0.952,0.962,0.959,0.945	0.975,0.977	-0.022
85606	ENSG00000101084.12	C20orf24	chr20	+	35238003	35238133	35236207	35236403	35240412	35240960	85606	798,753,661,961	9,17,4,15	648,651	2,3	229	99	0.000764326	0.0405546	0.975,0.95,0.986,0.965	0.993,0.989	-0.022
8829	ENSG00000078304.15	PPP2R5C	chr14	+	102378737	102378810	102375925	102376027	102391477	102393856	8829	907,895,530,663	24,20,3,3	736,839	2,1	172	99	3.44615e-05	0.00445719	0.956,0.963,0.99,0.992	0.995,0.998	-0.021
25233	ENSG00000011304.12	PTBP1	chr19	+	807868	807902	806407	806556	808359	808452	25233	674,680,442,648	14,13,11,13	776,855	1,8	133	99	0.000127765	0.0110902	0.973,0.975,0.968,0.974	0.998,0.988	-0.021
73143	ENSG00000105576.11	TNPO2	chr19	-	12816823	12816923	12816495	12816582	12817009	12817096	73143	9,6,5,14	409,428,398,617	17,16	276,263	199	99	1.67929e-05	0.002583	0.011,0.007,0.006,0.011	0.03,0.029	-0.021
78196	ENSG00000090263.11	MRPS33	chr7	-	140710218	140710417	140705968	140706335	140714350	140714479	78196	1006,955,1426,1794	2,2,22,22	1172,1216	2,0	298	99	8.9677e-05	0.00873931	0.994,0.994,0.956,0.964	0.995,1.0	-0.021
16822	ENSG00000105968.14	H2AFV	chr7	-	44882875	44882953	44880497	44880611	44887567	44887620	16822	1009,948,732,943	27,27,10,11	1227,1347	8,13	177	99	0.000169088	0.0136346	0.954,0.952,0.976,0.98	0.988,0.983	-0.02
29957	ENSG00000140416.15	TPM1	chr15	+	63356262	63356341	63354774	63354844	63363288	63364114	29957	20,10,14,15	800,879,759,885	29,27	554,472	178	99	1.68176e-07	6.75767e-05	0.014,0.006,0.01,0.009	0.028,0.031	-0.02
41613	ENSG00000128739.16	SNRPN	chr15	+	25213078	25213229	25207260	25207356	25219457	25219581	41613	3636,3560,3064,4145	47,56,27,32	3054,3148	14,5	250	99	2.32427e-08	1.42086e-05	0.968,0.962,0.978,0.981	0.989,0.996	-0.02
53798	ENSG00000003989.12	SLC7A2	chr8	+	17412454	17412591	17412068	17412208	17415803	17415906	53798	4,5,1,5	318,218,183,204	13,12	193,188	236	99	0.000418531	0.0268771	0.005,0.01,0.002,0.01	0.027,0.026	-0.02
18021	ENSG00000134294.9	SLC38A2	chr12	-	46764294	46764410	46761049	46761123	46764558	46764640	18021	1189,1210,1307,1730	8,15,28,48	695,837	8,3	215	99	0.000869504	0.0442321	0.986,0.974,0.956,0.943	0.976,0.992	-0.019
29959	ENSG00000140416.15	TPM1	chr15	+	63356262	63356389	63354774	63354844	63363288	63364114	29959	29,19,19,22	800,879,759,885	38,37	554,472	226	99	6.28053e-08	3.09799e-05	0.016,0.009,0.011,0.011	0.029,0.033	-0.019
55585	ENSG00000174695.5	TMEM167A	chr5	-	82360826	82360936	82357695	82357730	82373139	82373315	55585	1902,1866,1934,2690	13,23,40,38	2251,2326	8,12	209	99	1.35013e-06	0.000386268	0.986,0.975,0.958,0.971	0.993,0.989	-0.019
78199	ENSG00000090263.11	MRPS33	chr7	-	140710218	140710460	140705853	140706335	140714350	140714479	78199	1245,1187,1832,2223	2,2,22,22	1439,1477	2,0	341	99	0.000236243	0.0174737	0.994,0.994,0.96,0.967	0.995,1.0	-0.019
7806	ENSG00000169045.13	HNRNPH1	chr5	-	179046269	179046408	179045145	179045324	179047892	179048036	7806	5001,4802,3708,4647	90,91,66,80	6264,6614	67,68	238	99	5.29878e-05	0.00600618	0.959,0.956,0.959,0.96	0.975,0.976	-0.017
39061	ENSG00000234741.3	GAS5	chr1	-	173833621	173833644	173833039	173833442	173833812	173833842	39061	3346,3481,4043,5045	141,121,148,211	4004,4107	103,102	122	99	0.000284441	0.0201829	0.951,0.959,0.957,0.951	0.969,0.97	-0.015
58953	ENSG00000153774.4	CFDP1	chr16	-	75448475	75448593	75446432	75446652	75467186	75467359	58953	987,1078,377,503	11,24,2,5	1342,1464	7,7	217	99	0.000771901	0.0408656	0.976,0.953,0.989,0.979	0.989,0.99	-0.015
50127	ENSG00000147677.6	EIF3H	chr8	-	117738254	117738411	117670487	117671219	117767904	117768036	50127	3214,3177,4555,6083	16,19,50,57	4209,4412	3,15	256	99	1.04808e-06	0.00031764	0.987,0.985,0.972,0.976	0.998,0.991	-0.014
48205	ENSG00000109180.10	OCIAD1	chr4	+	48859229	48859382	48853822	48853992	48862741	48863217	48205	2699,2598,3395,4012	30,24,17,29	2550,2740	7,9	252	99	0.000441945	0.0279732	0.972,0.977,0.987,0.982	0.993,0.992	-0.013
162	ENSG00000170889.9	RPS9	chr19	+	54710420	54710592	54710143	54710330	54711265	54711390	162	408,311,377,534	4637,4218,5086,6805	627,724	5765,6074	271	99	9.46639e-05	0.00905179	0.031,0.026,0.026,0.028	0.038,0.042	-0.012
29369	ENSG00000175061.13	C17orf76-AS1	chr17	+	16344387	16344444	16342640	16343567	16344681	16344929	29369	7581,7596,6871,9410	137,137,126,201	7220,7387	74,90	156	99	1.74332e-05	0.00264733	0.972,0.972,0.972,0.967	0.984,0.981	-0.012
85054	ENSG00000143420.13	ENSA	chr1	-	150598954	150599002	150598030	150598284	150599942	150600068	85054	29,38,14,18	1472,1537,1152,1462	38,43	1344,1150	147	99	0.000418188	0.0268771	0.013,0.016,0.008,0.008	0.019,0.025	-0.011
73441	ENSG00000169100.8	SLC25A6	chrX	-	1509084	1509183	1508133	1508620	1510791	1510996	73441	52,42,68,80	1686,1679,1731,2592	93,81	1649,1751	198	99	0.000301835	0.0210004	0.015,0.012,0.019,0.015	0.027,0.023	-0.01
76125	ENSG00000145425.5	RPS3A	chr4	+	152022126	152022314	152020724	152020866	152024022	152024084	76125	18905,18190,18286,22964	124,164,139,231	19686,20177	101,84	287	99	1.10884e-06	0.000333041	0.981,0.975,0.978,0.972	0.985,0.988	-0.01
61624	ENSG00000156411.5	C14orf2	chr14	-	104387276	104387545	104381402	104381526	104387806	104387838	61624	174,173,308,436	3755,3947,3881,5138	112,120	2774,2973	368	99	0.000123233	0.0108831	0.012,0.012,0.021,0.022	0.011,0.011	0.006
65632	ENSG00000129559.8	NEDD8	chr14	-	24700857	24700943	24687589	24687637	24701455	24701531	65632	58,84,62,129	2752,2795,1966,2624	51,54	2562,2771	185	99	0.000376223	0.0248885	0.011,0.016,0.017,0.026	0.011,0.01	0.007
4764	ENSG00000147403.12	RPL10	chrX	+	153628804	153628967	153628143	153628282	153629042	153629152	4764	21273,19912,19192,27118	150,141,47,85	23964,26820	188,229	262	99	1.36414e-06	0.000387177	0.982,0.982,0.994,0.992	0.98,0.978	0.009
16992	ENSG00000089157.11	RPLP0	chr12	-	120636356	120636542	120635124	120635265	120636656	120636803	16992	58944,57368,56554,75890	434,492,540,729	74747,77721	906,925	285	99	0.000666285	0.0370283	0.979,0.976,0.973,0.973	0.966,0.967	0.009
25530	ENSG00000169020.5	ATP5I	chr4	-	667700	667755	667091	667190	668000	668127	25530	6078,6036,5294,7514	37,63,35,44	5245,5094	60,72	154	99	8.48097e-05	0.00840343	0.991,0.984,0.99,0.991	0.983,0.978	0.009
56948	ENSG00000133112.12	TPT1	chr13	-	45914846	45914955	45914128	45914319	45915176	45915293	56948	10153,10298,12928,18374	104,80,75,90	10131,10723	111,126	208	99	4.57531e-05	0.00546319	0.979,0.984,0.988,0.99	0.977,0.976	0.009
7816	ENSG00000169045.13	HNRNPH1	chr5	-	179048843	179048977	179048242	179048398	179050037	179050165	7816	83,90,70,90	2194,1999,1560,2014	53,48	2529,2739	233	99	2.59883e-07	9.68119e-05	0.016,0.019,0.019,0.019	0.009,0.007	0.01
83671	ENSG00000109332.15	UBE2D3	chr4	-	103746395	103746474	103730948	103731012	103747641	103748279	83671	28,41,88,134	1633,1795,1815,2421	33,26	1662,1672	178	99	8.66057e-06	0.00159239	0.009,0.013,0.026,0.03	0.011,0.009	0.01
39870	ENSG00000089006.12	SNX5	chr20	-	17931664	17931971	17930934	17931040	17932143	17932239	39870	76,55,40,87	612,507,441,611	53,43	679,727	406	99	0.000290104	0.0204052	0.029,0.026,0.022,0.034	0.019,0.014	0.011
25521	ENSG00000110321.11	EIF4G2	chr11	-	10829823	10830055	10828801	10828928	10830251	10830487	25521	34,18,19,36	424,445,320,388	7,8	252,303	331	99	0.000824302	0.0426609	0.023,0.012,0.017,0.027	0.008,0.008	0.012
50032	ENSG00000104529.13	EEF1D	chr8	-	144676062	144676241	144668898	144669022	144679517	144679564	50032	36,32,41,70	785,713,801,1099	19,16	1282,1259	278	99	1.15515e-06	0.000342826	0.016,0.016,0.018,0.022	0.005,0.005	0.013
51064	ENSG00000100814.13	CCNB1IP1	chr14	-	20785953	20786133	20784385	20784719	20793697	20793812	51064	52,49,67,74	647,618,777,1049	25,32	755,709	279	99	2.44654e-05	0.00343111	0.028,0.027,0.03,0.024	0.012,0.016	0.013
24632	ENSG00000092199.13	HNRNPC	chr14	-	21736781	21736827	21702111	21702388	21737456	21737551	24632	72,60,40,42	1386,1363,718,948	30,46	1357,1367	145	99	0.00045291	0.0284907	0.034,0.029,0.037,0.029	0.015,0.022	0.014
24633	ENSG00000092199.13	HNRNPC	chr14	-	21736781	21736827	21731469	21731495	21737456	21737551	24633	167,130,97,115	2430,2276,1922,2582	94,101	2743,3023	145	99	6.48703e-05	0.00698762	0.045,0.038,0.033,0.03	0.023,0.022	0.014
49640	ENSG00000174720.11	LARP7	chr4	+	113558799	113558943	113558281	113558395	113565823	113566027	49640	27,19,21,17	374,360,343,438	17,4	461,501	243	99	0.00027896	0.0199524	0.029,0.021,0.024,0.016	0.015,0.003	0.014
50023	ENSG00000104529.13	EEF1D	chr8	-	144676044	144676241	144668898	144669022	144679517	144679532	50023	36,36,41,77	785,713,801,1099	17,20	1282,1259	296	99	9.73625e-07	0.000299802	0.015,0.017,0.017,0.023	0.004,0.005	0.014
76499	ENSG00000134986.9	NREP	chr5	-	111070366	111070439	111066213	111066743	111071126	111071204	76499	26,42,26,19	725,774,363,609	23,10	761,743	172	99	0.000382145	0.025145	0.02,0.03,0.04,0.018	0.017,0.008	0.014
15904	ENSG00000102317.13	RBM3	chrX	+	48434309	48434471	48433948	48434055	48434701	48434807	15904	81,95,73,87	1344,1174,1025,1538	40,61	1941,2115	261	99	5.38347e-12	1.16681e-08	0.022,0.03,0.026,0.021	0.008,0.011	0.015
36897	ENSG00000139644.8	TMBIM6	chr12	+	50135739	50136063	50135339	50135394	50146246	50146332	36897	45,40,98,122	525,741,647,877	26,27	623,646	423	99	1.47584e-08	9.61711e-06	0.02,0.012,0.034,0.032	0.01,0.01	0.015
36967	ENSG00000180879.9	SSR4	chrX	+	153061117	153061316	153060133	153060209	153061888	153062007	36967	247,177,192,232	3122,2663,3158,3629	80,80	3639,3628	298	99	2.22045e-16	1.58815e-12	0.026,0.022,0.02,0.021	0.007,0.007	0.015
41788	ENSG00000178035.7	IMPDH2	chr3	-	49065680	49065755	49065142	49065349	49065863	49065906	41788	1183,988,1084,1496	7,3,11,6	1758,1933	18,36	174	99	5.77306e-05	0.00641168	0.99,0.995,0.982,0.993	0.982,0.968	0.015
51155	ENSG00000128609.10	NDUFA5	chr7	-	123191421	123191630	123190262	123190640	123197457	123197502	51155	47,70,139,189	1279,1167,1245,1768	44,32	1197,1334	308	99	1.04004e-10	1.27571e-07	0.012,0.019,0.035,0.033	0.012,0.008	0.015
60496	ENSG00000174886.8	NDUFA11	chr19	-	5901345	5901465	5896915	5897008	5903622	5903765	60496	275,218,277,366	2269,2092,1904,2982	156,166	1800,1949	219	99	0.00100426	0.048558	0.052,0.045,0.062,0.053	0.038,0.037	0.015
66850	ENSG00000167863.7	ATP5H	chr17	-	73036186	73036258	73035303	73035366	73038275	73038372	66850	3412,3474,2996,3906	22,38,12,11	3377,3573	46,57	171	99	1.48283e-07	6.21118e-05	0.989,0.981,0.993,0.995	0.977,0.973	0.015
71432	ENSG00000134202.6	GSTM3	chr1	-	110282454	110282530	110282050	110282115	110282861	110283133	71432	754,689,1477,2067	16,26,2,16	1015,1133	22,33	175	99	0.000505129	0.0306545	0.964,0.937,0.998,0.987	0.963,0.951	0.015
81778	ENSG00000127990.11	SGCE	chr7	-	94227241	94227316	94218000	94218044	94228086	94228275	81778	27,53,8,17	665,791,306,454	4,10	501,432	174	99	2.81006e-05	0.00382832	0.023,0.037,0.015,0.021	0.005,0.013	0.015
23959	ENSG00000153233.8	PTPRR	chr12	-	71066499	71066756	71056274	71056385	71077906	71078044	23959	52,74,16,17	371,526,170,234	6,13	169,187	356	99	0.000509841	0.0307554	0.038,0.038,0.026,0.02	0.01,0.019	0.016
41864	ENSG00000110721.7	CHKA	chr11	-	67828959	67829297	67820981	67821514	67829419	67829501	41864	20,15,19,22	150,175,160,212	6,7	192,166	437	99	0.000201483	0.0156557	0.029,0.019,0.026,0.023	0.007,0.009	0.016
56580	ENSG00000205581.6	HMGN1	chr21	-	40719304	40719404	40717071	40717200	40720217	40720265	56580	135,120,168,220	1762,1641,1399,1788	129,127	1951,2117	199	99	0.000199745	0.0155627	0.037,0.035,0.056,0.058	0.032,0.029	0.016
16995	ENSG00000089157.11	RPLP0	chr12	-	120636356	120636573	120635124	120635265	120636656	120636803	16995	32128,30768,30774,40938	434,492,540,729	40472,42635	906,925	316	99	0.000822802	0.0426609	0.959,0.951,0.947,0.946	0.933,0.935	0.017
36890	ENSG00000139644.8	TMBIM6	chr12	+	50135739	50135898	50135331	50135394	50146246	50146332	36890	54,69,93,117	525,741,647,877	43,45	623,646	258	99	0.000290142	0.0204052	0.038,0.034,0.052,0.049	0.026,0.026	0.017
80674	ENSG00000108953.12	YWHAE	chr17	-	1273002	1273035	1268152	1268352	1303340	1303445	80674	133,157,111,168	2107,2053,1934,2666	101,66	2003,2212	132	99	6.18277e-05	0.00679287	0.045,0.054,0.041,0.045	0.036,0.022	0.017
15903	ENSG00000102317.13	RBM3	chrX	+	48434202	48434471	48433948	48434055	48434701	48434807	15903	138,166,107,137	1344,1174,1025,1538	73,89	1941,2115	368	99	9.99201e-16	5.95557e-12	0.027,0.037,0.027,0.023	0.01,0.011	0.018
16990	ENSG00000089157.11	RPLP0	chr12	-	120636356	120636434	120635124	120635265	120636656	120636803	16990	15621,14903,15137,20131	434,492,540,729	19627,20864	906,925	177	99	0.000737187	0.0396142	0.953,0.944,0.94,0.939	0.924,0.927	0.018
22848	ENSG00000111011.13	RSRC2	chr12	-	123007345	123007453	123006689	123006846	123011394	123011506	22848	20,16,18,29	317,350,277,349	11,5	339,315	207	99	0.000200791	0.0156271	0.029,0.021,0.03,0.038	0.015,0.008	0.018
27529	ENSG00000015479.13	MATR3	chr5	+	138651385	138651427	138645731	138650425	138651764	138651782	27529	2130,2264,2022,2681	23,34,33,37	2671,2835	75,76	141	99	4.30459e-06	0.000941534	0.985,0.979,0.977,0.981	0.962,0.963	0.018
31788	ENSG00000140632.12	GLYR1	chr16	-	4893404	4893603	4882774	4882913	4895074	4895154	31788	18,33,40,58	471,431,364,474	16,9	388,450	298	99	1.17214e-06	0.000345004	0.013,0.025,0.035,0.039	0.014,0.007	0.018
35623	ENSG00000092201.5	SUPT16H	chr14	-	21840627	21840876	21840032	21840203	21841496	21841589	35623	52,37,31,44	643,572,250,292	27,21	637,666	348	99	1.60052e-07	6.57904e-05	0.022,0.018,0.034,0.041	0.012,0.009	0.018
52979	ENSG00000217930.3	PAM16	chr16	-	4393483	4393595	4393207	4393292	4401232	4401373	52979	9,12,24,35	324,325,227,434	5,9	298,325	211	99	0.000227572	0.017026	0.013,0.017,0.047,0.036	0.008,0.013	0.018
64019	ENSG00000111832.8	RWDD1	chr6	+	116893584	116893641	116892725	116892818	116901457	116901523	64019	18,16,1,8	326,307,115,181	3,5	352,351	156	99	0.000215541	0.0164529	0.034,0.032,0.005,0.027	0.005,0.009	0.018
9367	ENSG00000161654.5	LSM12	chr17	-	42114229	42114470	42113534	42113668	42114779	42114906	9367	17,15,31,24	188,208,178,252	9,7	199,201	340	99	0.000192301	0.0150647	0.026,0.021,0.048,0.027	0.013,0.01	0.019
39435	ENSG00000125952.14	MAX	chr14	-	65544061	65544146	65541844	65543381	65544630	65544754	39435	8,6,26,15	318,395,292,361	2,2	320,361	184	99	0.000437468	0.0277635	0.013,0.008,0.046,0.022	0.003,0.003	0.019
64005	ENSG00000067715.9	SYT1	chr12	+	79389538	79389627	79371564	79371711	79441076	79441142	64005	29,40,33,32	756,779,374,538	9,8	429,392	188	99	3.52938e-05	0.00450778	0.02,0.026,0.044,0.03	0.011,0.011	0.019
82390	ENSG00000152700.9	SAR1B	chr5	-	133967766	133967889	133959651	133959727	133968417	133968515	82390	20,22,27,48	459,427,262,408	13,11	341,384	222	99	0.00024085	0.0177046	0.019,0.022,0.044,0.05	0.017,0.013	0.019
9298	ENSG00000070669.12	ASNS	chr7	-	97501030	97501308	97499089	97499125	97501662	97501720	9298	37,48,94,121	359,328,583,869	15,15	245,288	377	99	3.29672e-06	0.000772354	0.026,0.037,0.041,0.035	0.016,0.013	0.02
19608	ENSG00000172590.14	MRPL52	chr14	+	23300172	23300246	23299395	23299463	23302626	23302677	19608	75,58,32,51	615,606,492,765	39,27	661,677	173	99	0.000539465	0.031994	0.065,0.052,0.036,0.037	0.033,0.022	0.02
30985	ENSG00000115677.12	HDLBP	chr2	-	242208243	242208368	242207891	242207956	242212175	242212228	30985	29,30,22,49	302,242,268,418	28,25	465,486	224	99	0.000676557	0.0374536	0.041,0.052,0.035,0.049	0.026,0.022	0.02
52228	ENSG00000091129.15	NRCAM	chr7	-	107808721	107808847	107800805	107800937	107816874	107817051	52228	29,27,41,26	309,291,322,408	11,13	285,258	225	99	0.000900206	0.0451713	0.04,0.039,0.053,0.027	0.017,0.022	0.02
61681	ENSG00000104738.12	MCM4	chr8	+	48879924	48880045	48877133	48877272	48882357	48882617	61681	985,869,425,641	3,2,1,2	1132,1181	20,7	220	99	0.000544566	0.0321366	0.993,0.995,0.995,0.993	0.962,0.987	0.02
39413	ENSG00000185414.15	MRPL30	chr2	+	99803381	99803481	99802639	99802717	99804639	99804720	39413	17,15,13,22	306,294,194,280	8,4	323,310	199	99	4.71952e-05	0.00555192	0.027,0.025,0.032,0.038	0.012,0.006	0.021
48589	ENSG00000172531.10	PPP1CA	chr11	-	67168538	67168670	67168159	67168390	67169198	67169259	48589	2681,2941,1948,2734	33,44,40,31	2459,2522	68,56	231	99	0.000278956	0.0199524	0.972,0.966,0.954,0.974	0.939,0.951	0.021
51895	ENSG00000087460.19	GNAS	chr20	+	57466636	57466920	57428317	57430388	57470666	57470739	51895	7469,7062,6671,9056	23,24,11,26	6389,6714	57,52	383	99	5.18562e-11	7.03968e-08	0.988,0.987,0.994,0.989	0.967,0.971	0.021
60537	ENSG00000028310.13	BRD9	chr5	-	868721	868919	865528	865696	870587	870668	60537	15,16,11,7	156,162,153,166	1,3	136,153	297	99	0.000434841	0.0276951	0.031,0.032,0.023,0.014	0.002,0.006	0.021
67921	ENSG00000066044.9	ELAVL1	chr19	-	8038442	8038509	8032448	8032674	8038608	8038762	67921	8,10,13,22	306,293,293,343	2,2	337,394	166	99	4.76606e-05	0.00555192	0.015,0.02,0.026,0.037	0.004,0.003	0.021
82631	ENSG00000123562.12	MORF4L2	chrX	-	102933426	102933528	102930423	102931979	102940098	102940188	82631	3571,3648,2342,3128	30,7,29,14	2912,2975	27,79	201	99	1.4131e-09	1.3126e-06	0.983,0.996,0.975,0.991	0.982,0.949	0.021
83740	ENSG00000113810.11	SMC4	chr3	+	160130317	160130637	160130113	160130241	160131260	160131371	83740	19,33,39,45	297,266,193,186	33,28	523,458	419	99	2.46394e-06	0.000609795	0.015,0.028,0.046,0.054	0.015,0.014	0.021
4688	ENSG00000182670.9	TTC3	chr21	+	38530432	38530505	38528956	38529208	38532000	38532047	4688	21,20,34,56	378,389,454,607	9,16	474,459	172	99	7.95812e-06	0.00149395	0.031,0.029,0.041,0.05	0.011,0.02	0.022
51061	ENSG00000100814.13	CCNB1IP1	chr14	-	20785952	20786133	20784385	20784719	20793697	20793812	51061	83,75,107,127	647,618,777,1049	39,47	755,709	280	99	1.17913e-07	5.02001e-05	0.043,0.041,0.046,0.041	0.018,0.023	0.022
53933	ENSG00000167508.6	MVD	chr16	-	88729119	88729189	88725057	88725128	88729418	88729499	53933	3,6,20,22	213,191,228,353	2,1	176,157	169	99	0.000323491	0.0221198	0.008,0.018,0.049,0.035	0.007,0.004	0.022
38333	ENSG00000168385.13	SEPT2	chr2	+	242255836	242255990	242255373	242255397	242263630	242263656	38333	260,234,206,310	1267,1188,867,1140	172,202	1179,1180	253	99	0.000997269	0.0482929	0.074,0.072,0.085,0.096	0.054,0.063	0.023
63995	ENSG00000067715.9	SYT1	chr12	+	79320376	79320500	79258777	79258889	79371578	79371711	63995	28,26,29,37	507,545,226,339	11,8	299,337	223	99	8.0032e-05	0.00809676	0.024,0.021,0.054,0.046	0.016,0.01	0.023
77931	ENSG00000103121.4	CMC2	chr16	-	81031889	81032078	81030918	81031034	81040338	81040499	77931	4,14,40,43	442,440,210,322	8,8	368,379	288	99	5.49578e-06	0.00112656	0.003,0.011,0.061,0.044	0.007,0.007	0.023
79552	ENSG00000114573.5	ATP6V1A	chr3	+	113499578	113499630	113497587	113497682	113499896	113500025	79552	13,11,43,48	613,666,422,561	7,9	395,461	151	99	4.34772e-05	0.00527956	0.014,0.011,0.063,0.053	0.011,0.013	0.023
82635	ENSG00000123562.12	MORF4L2	chrX	-	102933426	102933579	102930432	102931979	102940098	102940188	82635	3434,3417,2271,3003	30,7,29,14	3121,3154	27,79	252	99	5.19014e-08	2.70963e-05	0.978,0.995,0.969,0.988	0.978,0.94	0.023
9463	ENSG00000165443.7	PHYHIPL	chr10	+	60966513	60966604	60936420	60936719	60994063	60994260	9463	80,64,62,69	698,796,402,512	45,40	631,601	190	99	0.000608673	0.0348	0.056,0.04,0.074,0.066	0.036,0.034	0.024
25718	ENSG00000167747.9	C19orf48	chr19	-	51302550	51302614	51300960	51302215	51305473	51305514	25718	1270,1269,882,1033	20,11,5,15	1169,1056	24,34	163	99	6.2887e-05	0.00684617	0.975,0.986,0.991,0.977	0.967,0.95	0.024
52882	ENSG00000081307.8	UBA5	chr3	+	132379742	132379892	132379444	132379542	132384666	132384712	52882	24,22,39,51	250,287,231,302	9,19	220,230	249	99	0.000872338	0.0442786	0.037,0.03,0.063,0.063	0.016,0.032	0.024
54772	ENSG00000158604.10	TMED4	chr7	-	44620691	44620838	44617492	44619227	44621047	44621173	54772	1332,1311,1011,1372	8,6,0,1	933,1066	19,6	246	99	8.77027e-05	0.00860473	0.985,0.989,1.0,0.998	0.952,0.986	0.024
1862	ENSG00000183648.5	NDUFB1	chr14	-	92585192	92585310	92583841	92583986	92587985	92588068	1862	46,50,92,133	360,242,1350,1079	37,26	381,616	217	99	0.000505681	0.0306545	0.055,0.086,0.03,0.053	0.042,0.019	0.025
26249	ENSG00000145730.16	PAM	chr5	+	102353037	102353137	102345454	102345570	102355493	102355547	26249	858,945,1239,1783	4,8,7,13	581,603	16,7	199	99	0.000411457	0.0265605	0.991,0.983,0.989,0.986	0.948,0.977	0.025
30182	ENSG00000077782.15	FGFR1	chr8	-	38280542	38280693	38279360	38279459	38282026	38282217	30182	13,13,7,6	115,106,116,172	3,1	119,116	250	99	0.000973118	0.0475094	0.043,0.046,0.023,0.014	0.01,0.003	0.025
61609	ENSG00000088682.9	COQ9	chr16	+	57492157	57492262	57490842	57490927	57493476	57493509	61609	776,832,676,1068	10,8,13,7	758,787	26,13	204	99	0.000915449	0.0457239	0.974,0.981,0.962,0.987	0.934,0.967	0.025
9588	ENSG00000120802.9	TMPO	chr12	+	98938007	98938127	98931252	98931350	98938219	98938315	9588	910,948,546,811	8,15,9,0	1415,1406	27,37	219	99	0.000103678	0.00964302	0.981,0.966,0.965,1.0	0.959,0.945	0.026
48423	ENSG00000115524.11	SF3B1	chr2	-	198283619	198283675	198283232	198283312	198285151	198285266	48423	77,79,38,89	1004,1040,783,1054	40,29	1276,1325	155	99	9.59278e-11	1.20371e-07	0.047,0.046,0.03,0.051	0.02,0.014	0.026
52624	ENSG00000162694.9	EXTL2	chr1	-	101343979	101344003	101343031	101343459	101354308	101354384	52624	12,4,8,10	189,185,160,214	2,3	230,218	123	99	0.000694418	0.0380594	0.049,0.017,0.039,0.036	0.007,0.011	0.026
56582	ENSG00000205581.6	HMGN1	chr21	-	40719304	40719409	40717071	40717200	40720217	40720265	56582	181,185,251,305	1762,1641,1399,1788	155,175	1951,2117	204	99	8.91404e-07	0.000280867	0.047,0.052,0.08,0.076	0.037,0.039	0.026
64893	ENSG00000272869.1	CTC-487M23.8	chr5	+	112200317	112200429	112200153	112200225	112227299	112227422	64893	558,639,642,879	4,3,1,5	489,489	17,1	211	99	0.000295711	0.0207154	0.985,0.99,0.997,0.988	0.931,0.996	0.026
30991	ENSG00000115677.12	HDLBP	chr2	-	242208368	242208520	242207891	242207956	242212175	242212227	30991	54,54,40,94	302,242,268,418	45,67	465,486	251	99	0.000686479	0.0378165	0.066,0.081,0.056,0.081	0.037,0.052	0.027
38331	ENSG00000168385.13	SEPT2	chr2	+	242255836	242255970	242255319	242255397	242263630	242263656	38331	252,233,207,306	1267,1188,867,1140	161,197	1179,1180	233	99	0.000341542	0.0230675	0.078,0.077,0.092,0.102	0.055,0.066	0.027
38683	ENSG00000143933.12	CALM2	chr2	-	47399552	47399598	47397872	47397903	47403579	47403650	38683	2393,2210,838,1111	16582,16878,8824,10489	1042,1017	14015,14061	145	99	1.66925e-07	6.74528e-05	0.09,0.082,0.061,0.067	0.048,0.047	0.027
48864	ENSG00000177879.10	AP3S1	chr5	+	115205713	115205825	115202357	115202458	115230783	115230855	48864	655,669,1244,1448	26,18,11,9	708,706	22,26	211	99	0.00069182	0.0379753	0.922,0.946,0.982,0.987	0.938,0.927	0.027
56574	ENSG00000205581.6	HMGN1	chr21	-	40717755	40717884	40717071	40717200	40720217	40720265	56574	192,143,264,361	1762,1641,1399,1788	152,161	1951,2117	228	99	2.54807e-08	1.52381e-05	0.045,0.036,0.076,0.081	0.033,0.032	0.027
62168	ENSG00000169189.12	NSMCE1	chr16	-	27253119	27253210	27246536	27246620	27268755	27268902	62168	11,21,15,23	185,243,280,420	2,5	322,317	190	99	1.07675e-06	0.00032495	0.03,0.043,0.027,0.028	0.003,0.008	0.027
69362	ENSG00000170231.11	FABP6	chr5	+	159655479	159655699	159640733	159640826	159656552	159656631	69362	81,92,61,107	340,400,435,564	48,50	434,483	319	99	3.06836e-05	0.00407921	0.069,0.067,0.042,0.056	0.033,0.031	0.027
76666	ENSG00000100320.18	RBFOX2	chr22	-	36164303	36164396	36161469	36161530	36174071	36174079	76666	906,988,694,930	26,28,10,4	1256,1289	49,39	192	99	0.000900743	0.0451713	0.947,0.948,0.973,0.992	0.93,0.945	0.027
85228	ENSG00000007392.12	LUC7L	chr16	-	258599	258663	258076	258187	270647	270746	85228	27,28,19,26	348,335,247,345	16,8	379,430	163	99	2.17986e-05	0.00317265	0.045,0.048,0.045,0.044	0.025,0.011	0.027
85929	ENSG00000138796.11	HADH	chr4	+	108925819	108926073	108911010	108911220	108930914	108931043	85929	15,31,28,22	147,110,114,174	19,16	219,205	353	99	0.000493256	0.0302311	0.028,0.073,0.064,0.034	0.024,0.021	0.027
1802	ENSG00000127616.13	SMARCA4	chr19	+	11150133	11150229	11145589	11145808	11151982	11152236	1802	21,22,53,61	414,415,341,493	14,21	509,480	195	99	6.83278e-07	0.00022214	0.025,0.026,0.073,0.059	0.014,0.022	0.028
11638	ENSG00000138757.10	G3BP2	chr4	-	76579166	76579265	76573822	76573925	76580249	76580430	11638	172,173,187,273	1172,1152,826,1218	119,167	1189,1181	198	99	0.000166851	0.0135612	0.068,0.07,0.102,0.101	0.048,0.066	0.028
21945	ENSG00000203875.6	SNHG5	chr6	-	86387512	86387593	86387046	86387210	86387671	86387750	21945	10286,9603,11547,15433	278,205,222,320	10128,10586	412,407	180	99	2.72551e-09	2.2934e-06	0.953,0.963,0.966,0.964	0.931,0.935	0.028
30998	ENSG00000115677.12	HDLBP	chr2	-	242208615	242208710	242207891	242207956	242212175	242212227	30998	32,19,43,66	302,242,268,418	31,31	465,486	194	99	0.000111265	0.0100736	0.051,0.039,0.076,0.075	0.033,0.032	0.028
35875	ENSG00000196262.9	PPIA	chr7	+	44838346	44838413	44836279	44836392	44838845	44838876	35875	635,615,1217,1665	16758,16001,11771,17178	315,342	16751,18510	166	99	0	0	0.022,0.022,0.058,0.055	0.011,0.011	0.028
38328	ENSG00000168385.13	SEPT2	chr2	+	242255836	242255955	242255296	242255397	242263630	242263656	38328	244,235,208,307	1267,1188,867,1140	164,195	1179,1180	218	99	0.000436977	0.0277569	0.08,0.082,0.098,0.109	0.059,0.07	0.028
49984	ENSG00000104529.13	EEF1D	chr8	-	144668388	144668460	144663223	144663498	144668898	144669019	49984	2108,2063,1944,2706	56,45,33,64	3009,3038	112,132	171	99	4.43308e-06	0.000966682	0.956,0.964,0.972,0.961	0.94,0.93	0.028
62817	ENSG00000172954.9	LCLAT1	chr2	+	30775358	30775515	30755981	30756180	30785011	30785158	62817	11,17,47,49	179,136,181,244	14,12	165,163	256	99	0.00102471	0.0491228	0.023,0.046,0.091,0.072	0.032,0.028	0.028
12356	ENSG00000205133.7	TRIQK	chr8	-	93972728	93972947	93965642	93966792	93978234	93978371	12356	8,14,16,11	101,95,85,107	3,6	144,142	318	99	3.28033e-05	0.00427362	0.024,0.044,0.055,0.031	0.006,0.013	0.029
19827	ENSG00000118816.5	CCNI	chr4	-	77977401	77977476	77976302	77976533	77979659	77979788	19827	393,380,473,718	6,1,2,7	417,445	7,15	174	99	0.00035256	0.0236331	0.974,0.995,0.993,0.983	0.971,0.944	0.029
56691	ENSG00000099284.9	H2AFY2	chr10	+	71859963	71860053	71855409	71855509	71868788	71868936	56691	506,569,546,774	3,2,4,4	485,492	12,9	189	99	6.95521e-05	0.00732643	0.989,0.993,0.986,0.99	0.955,0.966	0.029
63231	ENSG00000160439.11	RDH13	chr19	-	55562067	55562370	55560024	55560131	55568020	55568176	63231	8,9,1,16	60,70,68,80	0,0	34,65	402	99	0.000845262	0.0434533	0.032,0.031,0.004,0.047	0.0,0.0	0.029
67028	ENSG00000131051.16	RBM39	chr20	-	34327314	34327469	34326889	34326939	34328745	34328809	67028	103,95,65,111	452,482,311,392	59,67	418,455	254	99	0.000971259	0.0474777	0.082,0.071,0.075,0.099	0.052,0.054	0.029
79193	ENSG00000031823.10	RANBP3	chr19	-	5951403	5951607	5941809	5941846	5957928	5957979	79193	46,44,33,66	244,210,213,259	18,38	282,261	303	99	0.000125464	0.0109703	0.058,0.064,0.048,0.077	0.02,0.045	0.029
82633	ENSG00000123562.12	MORF4L2	chrX	-	102933426	102933548	102931753	102931979	102940098	102940188	82633	2819,2887,1866,2431	30,7,29,14	2334,2352	27,79	221	99	1.8967e-09	1.65438e-06	0.977,0.995,0.966,0.987	0.975,0.93	0.029
14083	ENSG00000164975.11	SNAPC3	chr9	+	15447092	15447242	15444599	15444704	15451317	15451400	14083	1013,1019,685,893	14,17,0,6	977,1012	24,20	249	99	0.000706541	0.0385173	0.966,0.96,1.0,0.983	0.942,0.953	0.03
29846	ENSG00000153044.5	CENPH	chr5	+	68498745	68498797	68498332	68498396	68504022	68504186	29846	428,436,413,513	5,6,3,3	701,711	17,26	151	99	7.38716e-06	0.00142415	0.982,0.979,0.989,0.991	0.964,0.947	0.03
32085	ENSG00000182628.8	SKA2	chr17	-	57208641	57208728	57196659	57196856	57232491	57232535	32085	855,744,582,710	19,21,5,11	994,1086	29,47	186	99	0.000740782	0.0396882	0.96,0.95,0.984,0.972	0.948,0.925	0.03
35876	ENSG00000196262.9	PPIA	chr7	+	44838346	44838503	44836279	44836392	44838845	44838876	35876	1259,1135,2045,2758	16758,16001,11771,17178	579,670	16751,18510	256	99	0	0	0.028,0.027,0.063,0.058	0.013,0.014	0.03
52030	ENSG00000014641.13	MDH1	chr2	+	63824532	63824708	63815742	63816180	63826303	63826422	52030	1510,1470,1727,2269	9,24,1,3	1509,1572	23,31	275	99	1.02759e-07	4.48154e-05	0.984,0.957,0.998,0.996	0.959,0.948	0.03
56993	ENSG00000055044.6	NOP58	chr2	+	203142934	203143052	203142672	203142725	203147073	203147195	56993	95,120,135,118	526,559,508,640	93,88	673,667	217	99	0.000541134	0.0320133	0.076,0.089,0.108,0.078	0.059,0.057	0.03
57709	ENSG00000141002.14	TCF25	chr16	+	89944868	89945035	89940051	89940267	89949758	89949920	57709	21,34,45,54	228,198,271,420	13,5	170,181	266	99	2.62835e-05	0.00362916	0.033,0.06,0.058,0.046	0.028,0.01	0.03
58946	ENSG00000153774.4	CFDP1	chr16	-	75425277	75425406	75338921	75339080	75428987	75429034	58946	37,24,17,29	285,286,100,146	27,31	425,414	228	99	0.000729779	0.0392752	0.053,0.035,0.069,0.079	0.027,0.031	0.03
77067	ENSG00000082898.12	XPO1	chr2	-	61752404	61752468	61749745	61749818	61753554	61753658	77067	79,85,73,114	589,585,433,587	77,79	757,769	163	99	0.000807239	0.042113	0.075,0.081,0.093,0.106	0.058,0.059	0.03
78429	ENSG00000134905.12	CARS2	chr13	-	111300664	111301644	111298313	111299586	111303380	111303447	78429	19,45,14,24	70,54,71,86	8,4	120,113	1079	99	5.85647e-10	5.66052e-07	0.024,0.071,0.018,0.025	0.006,0.003	0.03
87474	ENSG00000144524.13	COPS7B	chr2	+	232655660	232655883	232653264	232653442	232656442	232656496	87474	12,17,17,7	150,161,73,111	2,1	83,93	322	99	0.000119344	0.0106301	0.024,0.031,0.067,0.019	0.007,0.003	0.03
28699	ENSG00000239672.3	NME1	chr17	+	49231585	49231805	49230936	49231023	49233011	49233141	28699	767,842,1264,1646	3339,3184,2887,4090	739,831	3483,3813	319	99	1.08097e-05	0.00188573	0.067,0.076,0.12,0.111	0.062,0.063	0.031
31643	ENSG00000049167.9	ERCC8	chr5	-	60220117	60220335	60217880	60217982	60224690	60224786	31643	24,20,20,46	193,182,204,235	1,13	212,244	317	99	1.3343e-08	8.91909e-06	0.037,0.033,0.03,0.058	0.001,0.016	0.031
35613	ENSG00000180398.7	MCFD2	chr2	-	47137918	47138012	47136161	47136316	47142861	47142949	35613	13,27,11,16	181,248,134,201	4,6	223,235	193	99	3.90082e-06	0.000877365	0.036,0.053,0.04,0.039	0.009,0.013	0.031
72707	ENSG00000127337.2	YEATS4	chr12	+	69755096	69755213	69753499	69753803	69756567	69756687	72707	8,2,16,8	99,126,98,133	0,3	145,145	216	99	0.000177497	0.0141373	0.036,0.007,0.07,0.027	0.0,0.009	0.031
74636	ENSG00000129084.13	PSMA1	chr11	-	14541450	14541757	14540542	14540587	14541842	14541991	74636	247,322,127,174	484,503,321,462	154,116	408,425	406	99	0.00085176	0.0436086	0.111,0.135,0.088,0.084	0.084,0.062	0.031
79288	ENSG00000157823.12	AP3S2	chr15	-	90420537	90420656	90414706	90414778	90431752	90431864	79288	38,41,33,47	287,271,287,311	9,15	166,203	218	99	0.000586671	0.0339491	0.057,0.064,0.05,0.064	0.024,0.032	0.031
87472	ENSG00000144524.13	COPS7B	chr2	+	232655631	232655883	232653264	232653442	232656442	232656472	87472	17,24,20,7	150,161,73,111	2,4	83,93	351	99	6.71033e-05	0.00715526	0.031,0.04,0.072,0.017	0.007,0.012	0.031
87473	ENSG00000144524.13	COPS7B	chr2	+	232655656	232655883	232653264	232653442	232656442	232656518	87473	12,17,18,7	150,161,73,111	2,1	83,93	326	99	9.64165e-05	0.00918255	0.024,0.031,0.07,0.019	0.007,0.003	0.031
25724	ENSG00000167747.9	C19orf48	chr19	-	51305710	51305871	51305473	51305514	51307828	51307877	25724	82,86,62,50	421,424,264,324	36,35	357,329	260	99	6.92955e-05	0.00731957	0.069,0.072,0.082,0.055	0.037,0.039	0.032
32598	ENSG00000068796.12	KIF2A	chr5	+	61668264	61668378	61662240	61662308	61669513	61669664	32598	16,16,32,51	308,302,263,333	4,7	238,262	213	99	8.91979e-08	4.14272e-05	0.024,0.024,0.054,0.066	0.008,0.012	0.032
48417	ENSG00000124422.7	USP22	chr17	-	20931854	20931987	20924425	20924539	20945977	20946352	48417	1216,1294,1032,1393	13,10,5,18	751,845	15,23	232	99	9.78952e-05	0.00924948	0.976,0.982,0.989,0.971	0.955,0.94	0.032
50025	ENSG00000104529.13	EEF1D	chr8	-	144676044	144676241	144674816	144674830	144679517	144679532	50025	37,36,42,84	376,308,293,457	17,20	476,586	296	99	1.99618e-13	7.51447e-10	0.032,0.038,0.046,0.058	0.012,0.011	0.032
64422	ENSG00000112983.13	BRD8	chr5	-	137499775	137499822	137498818	137499033	137500008	137500102	64422	193,215,134,204	1,4,0,1	209,245	5,9	146	99	0.00099246	0.0481113	0.992,0.973,1.0,0.993	0.966,0.949	0.032
72718	ENSG00000155621.10	C9orf85	chr9	+	74556720	74556850	74526556	74526752	74561921	74562028	72718	5,17,20,12	140,114,93,142	0,14	168,173	229	99	0.000711307	0.0386592	0.015,0.061,0.085,0.035	0.0,0.034	0.032
79013	ENSG00000106348.12	IMPDH1	chr7	-	128033775	128033792	128032330	128033082	128034331	128034415	79013	25,18,9,21	370,354,282,396	3,5	341,351	116	99	1.57793e-06	0.000439142	0.055,0.042,0.027,0.043	0.007,0.012	0.032
84975	ENSG00000131116.7	ZNF428	chr19	-	44112656	44112755	44111779	44112259	44118380	44118586	84975	32,30,36,63	250,311,407,502	8,7	179,199	198	99	3.7124e-05	0.00467475	0.06,0.046,0.042,0.059	0.022,0.017	0.032
20596	ENSG00000156958.10	GALK2	chr15	+	49611168	49611313	49584523	49584734	49611800	49612002	20596	10,5,8,12	112,126,65,103	1,1	93,123	244	99	0.000162447	0.0133244	0.035,0.016,0.048,0.045	0.004,0.003	0.033
83494	ENSG00000151748.10	SAV1	chr14	-	51134099	51134218	51132318	51132337	51134591	51135015	83494	5,4,9,14	77,50,75,122	2,2	91,122	218	99	0.000212767	0.0162759	0.029,0.035,0.052,0.05	0.01,0.007	0.033
8640	ENSG00000128973.7	CLN6	chr15	-	68504012	68504201	68503600	68503656	68510873	68510988	8640	475,423,361,517	1,5,0,2	496,496	7,10	288	99	0.000272943	0.0196688	0.994,0.967,1.0,0.989	0.961,0.945	0.034
13640	ENSG00000081087.10	OSTM1	chr6	-	108370735	108370787	108370456	108370622	108372234	108372270	13640	20,15,29,27	177,183,285,320	7,7	158,202	151	99	0.000845011	0.0434533	0.069,0.051,0.063,0.052	0.028,0.022	0.034
16729	ENSG00000205981.2	DNAJC19	chr3	-	180704730	180704810	180703197	180703784	180705810	180705884	16729	768,742,672,819	20,14,14,27	985,976	34,56	179	99	0.000507785	0.0307006	0.955,0.967,0.964,0.944	0.941,0.906	0.034
25991	ENSG00000104852.10	SNRNP70	chr19	+	49605370	49605442	49604646	49604728	49607890	49607992	25991	68,54,61,72	613,658,487,678	35,38	856,884	171	99	3.9354e-09	3.12751e-06	0.06,0.045,0.068,0.058	0.023,0.024	0.034
25992	ENSG00000104852.10	SNRNP70	chr19	+	49605370	49606844	49604646	49604728	49607890	49607992	25992	564,515,753,1048	613,658,487,678	502,528	856,884	1573	99	1.94099e-11	3.08506e-08	0.055,0.047,0.089,0.089	0.036,0.036	0.034
57099	ENSG00000117335.14	CD46	chr1	+	207940951	207940996	207940357	207940540	207941123	207941168	57099	28,13,95,133	495,531,623,863	16,23	462,476	144	99	1.88211e-06	0.000502298	0.037,0.017,0.095,0.096	0.023,0.032	0.034
74683	ENSG00000087088.15	BAX	chr19	+	49458943	49459090	49458185	49458219	49459454	49459573	74683	576,595,430,578	3,2,1,5	494,528	7,13	246	99	8.48285e-05	0.00840343	0.987,0.992,0.994,0.979	0.966,0.942	0.034
86158	ENSG00000136560.9	TANK	chr2	+	162059373	162059490	162036124	162036272	162059997	162060106	86158	0,1,15,22	104,80,81,97	2,2	81,81	216	99	0.000551588	0.0324172	0.0,0.006,0.078,0.094	0.011,0.011	0.034
41730	ENSG00000113593.7	PPWD1	chr5	+	64859629	64859666	64859122	64859333	64863339	64863442	41730	9,5,3,5	100,97,77,81	0,2	121,105	136	99	0.00102906	0.0492981	0.061,0.036,0.028,0.043	0.0,0.014	0.035
54931	ENSG00000187555.10	USP7	chr16	-	9023225	9023400	9017071	9017270	9024149	9024254	54931	34,46,22,45	163,210,163,223	16,19	200,224	274	99	2.93464e-05	0.00394938	0.07,0.073,0.046,0.068	0.028,0.03	0.035
56778	ENSG00000138658.11	C4orf21	chr4	-	113550914	113551171	113544972	113545032	113553085	113553166	56778	5,15,4,7	57,40,27,44	6,1	60,87	356	99	0.000612706	0.0349189	0.024,0.094,0.04,0.042	0.027,0.003	0.035
58105	ENSG00000214046.4	SMIM7	chr19	-	16763415	16763772	16756471	16758072	16764845	16764936	58105	161,212,44,93	381,350,348,489	55,64	371,411	456	99	3.8984e-07	0.000136681	0.084,0.116,0.027,0.04	0.031,0.033	0.035
10495	ENSG00000078618.15	NRD1	chr1	-	52302040	52302110	52301802	52301884	52305897	52306126	10495	10,16,7,11	133,142,68,92	9,5	190,213	169	99	0.000540406	0.0320133	0.042,0.062,0.057,0.065	0.027,0.014	0.036
38340	ENSG00000168385.13	SEPT2	chr2	+	242256913	242257014	242255358	242255397	242263630	242263656	38340	271,292,256,336	1267,1188,867,1140	208,203	1179,1180	200	99	0.000178185	0.0141763	0.096,0.108,0.128,0.127	0.08,0.078	0.036
42622	ENSG00000234857.2	HNRNPUL2-BSCL2	chr11	-	62458751	62458893	62458546	62458613	62459847	62459945	42622	1854,1850,819,1099	27,33,0,5	894,968	17,31	241	99	0.000126433	0.0110146	0.966,0.958,1.0,0.989	0.956,0.928	0.036
50367	ENSG00000114062.13	UBE3A	chr15	-	25650607	25650649	25620611	25620910	25683635	25683688	50367	195,181,71,121	2,0,1,0	189,225	10,3	141	99	0.000720947	0.0389219	0.986,1.0,0.98,1.0	0.93,0.981	0.036
77930	ENSG00000103121.4	CMC2	chr16	-	81031889	81031959	81030918	81031034	81040338	81040480	77930	6,17,41,44	442,440,210,322	9,12	368,379	169	99	1.40909e-05	0.00229575	0.008,0.022,0.103,0.074	0.014,0.018	0.036
27494	ENSG00000015479.13	MATR3	chr5	+	138614253	138614429	138614015	138614097	138614739	138614818	27494	62,61,56,65	248,203,215,307	52,51	356,377	275	99	0.000130774	0.0112965	0.083,0.098,0.086,0.071	0.05,0.046	0.037
30995	ENSG00000115677.12	HDLBP	chr2	-	242208372	242208710	242207891	242207956	242212175	242212249	30995	90,104,117,146	302,242,268,418	89,93	465,486	437	99	2.74364e-07	0.000101153	0.063,0.089,0.09,0.073	0.042,0.042	0.037
45515	ENSG00000161671.12	EMC10	chr19	+	50985117	50985204	50984140	50984234	50985405	50986608	45515	86,67,160,168	581,587,712,1058	41,48	499,604	186	99	1.357e-06	0.000386686	0.073,0.057,0.107,0.078	0.042,0.041	0.037
48713	ENSG00000006712.10	PAF1	chr19	-	39880899	39880929	39880525	39880801	39881457	39881722	48713	276,272,158,240	4,1,0,6	212,248	5,15	129	99	0.000120924	0.0107441	0.981,0.995,1.0,0.968	0.97,0.927	0.037
49994	ENSG00000104529.13	EEF1D	chr8	-	144672777	144672905	144671864	144672251	144674816	144675063	49994	44,38,64,130	425,406,340,493	25,53	506,614	227	99	4.58401e-08	2.43056e-05	0.043,0.039,0.076,0.103	0.021,0.036	0.037
53623	ENSG00000116586.7	LAMTOR2	chr1	+	156027768	156027858	156024875	156025216	156028105	156028297	53623	432,462,542,827	9,7,3,8	381,459	14,14	189	99	0.000279362	0.0199611	0.962,0.972,0.99,0.982	0.934,0.945	0.037
62882	ENSG00000130164.7	LDLR	chr19	+	11227534	11227674	11226769	11226888	11230767	11230909	62882	676,776,495,677	7,4,8,2	399,444	12,9	239	99	0.000424485	0.0271564	0.976,0.988,0.962,0.993	0.932,0.953	0.037
17775	ENSG00000120008.11	WDR11	chr10	+	122665387	122665533	122664830	122664928	122666287	122666367	17775	260,261,447,499	7,2,0,0	295,298	9,6	245	99	0.000230212	0.0171161	0.938,0.981,1.0,1.0	0.93,0.953	0.038
20506	ENSG00000204387.8	C6orf48	chr6	+	31804200	31804294	31803187	31803228	31805012	31805212	20506	487,482,578,767	1960,1988,1370,2050	300,394	1524,1576	193	99	0.000568394	0.0331868	0.113,0.111,0.178,0.161	0.092,0.114	0.038
21165	ENSG00000072803.13	FBXW11	chr5	-	171384600	171384702	171341346	171341409	171433461	171433552	21165	5,1,18,13	58,54,75,100	3,1	57,69	201	99	0.000670867	0.0371674	0.041,0.009,0.106,0.06	0.025,0.007	0.038
28053	ENSG00000118600.7	TMEM5	chr12	+	64176320	64176484	64174798	64174954	64178749	64178852	28053	5,25,45,88	119,110,184,307	10,15	135,156	263	99	2.40396e-05	0.00339116	0.016,0.079,0.084,0.097	0.027,0.035	0.038
72401	ENSG00000174939.6	ASPHD1	chr16	+	29917108	29917280	29916172	29916286	29930851	29930953	72401	561,574,780,1262	3,7,3,3	360,437	12,4	271	99	0.000221408	0.0167555	0.986,0.968,0.99,0.994	0.916,0.976	0.038
73191	ENSG00000135018.9	UBQLN1	chr9	-	86281264	86281348	86279944	86280060	86284099	86284242	73191	1350,1408,1124,1444	53,51,49,43	997,986	74,49	183	99	0.000473527	0.0295795	0.932,0.937,0.925,0.948	0.879,0.916	0.038
25980	ENSG00000138698.10	RAP1GDS1	chr4	+	99313102	99313231	99273626	99273752	99325627	99325737	25980	447,394,496,603	5,6,5,0	371,424	10,12	228	99	0.000173148	0.0138526	0.975,0.966,0.977,1.0	0.942,0.939	0.039
27968	ENSG00000132507.13	EIF5A	chr17	+	7211799	7211894	7211292	7211432	7212933	7213119	27968	11,9,38,86	116,93,191,274	8,7	120,66	194	99	0.000500544	0.0304954	0.046,0.047,0.092,0.138	0.033,0.051	0.039
31905	ENSG00000128989.6	ARPP19	chr15	-	52856386	52856443	52849296	52849419	52861044	52861099	31905	102,90,98,153	675,740,494,792	45,47	457,526	156	99	9.6619e-05	0.0091896	0.088,0.072,0.112,0.109	0.059,0.054	0.039
41787	ENSG00000178035.7	IMPDH2	chr3	-	49065631	49065755	49065143	49065349	49065863	49066239	41787	522,456,474,663	7,3,11,6	789,853	18,36	223	99	3.82263e-05	0.00477667	0.971,0.985,0.95,0.98	0.951,0.913	0.039
50035	ENSG00000104529.13	EEF1D	chr8	-	144676062	144676241	144674816	144674830	144679517	144679564	50035	44,38,55,83	376,308,293,457	21,18	476,586	278	99	4.88498e-15	2.49567e-11	0.04,0.042,0.063,0.061	0.015,0.011	0.039
85604	ENSG00000101084.12	C20orf24	chr20	+	35236292	35236403	35236117	35236221	35238003	35238133	85604	150,144,120,176	620,567,431,609	83,73	465,479	210	99	0.000237442	0.0175261	0.102,0.107,0.116,0.12	0.078,0.067	0.039
12763	ENSG00000137821.7	LRRC49	chr15	+	71190705	71190794	71187939	71188275	71193260	71193290	12763	2,1,6,21	54,52,42,92	1,3	78,90	188	99	0.000165267	0.0134784	0.019,0.01,0.07,0.107	0.007,0.017	0.04
50000	ENSG00000104529.13	EEF1D	chr8	-	144672777	144672908	144671160	144672251	144674816	144674967	50000	78,42,89,190	425,406,340,493	52,87	506,614	230	99	1.05979e-05	0.00185786	0.073,0.043,0.101,0.142	0.042,0.057	0.04
70230	ENSG00000012061.11	ERCC1	chr19	-	45917220	45917292	45916691	45917003	45920078	45920155	70230	203,190,284,413	4,5,1,2	194,212	6,10	171	99	0.000582783	0.0338886	0.967,0.957,0.994,0.992	0.949,0.925	0.04
77928	ENSG00000103121.4	CMC2	chr16	-	81031889	81031956	81030918	81031034	81040338	81040444	77928	6,17,43,53	442,440,210,322	11,11	368,379	166	99	4.20409e-06	0.000924457	0.008,0.023,0.109,0.089	0.018,0.017	0.04
9179	ENSG00000121848.9	RNF115	chr1	+	145646278	145646469	145646114	145646173	145650482	145650540	9179	31,32,49,49	162,158,170,228	19,12	167,174	290	99	1.3864e-05	0.00227956	0.061,0.065,0.09,0.068	0.037,0.023	0.041
18998	ENSG00000023228.9	NDUFS1	chr2	-	207017142	207017234	207014503	207014649	207018341	207018406	18998	1090,1074,1447,1929	29,43,25,25	758,775	41,33	191	99	1.59422e-05	0.00248069	0.951,0.928,0.968,0.976	0.906,0.924	0.041
30988	ENSG00000115677.12	HDLBP	chr2	-	242208243	242208710	242207913	242207956	242212175	242212246	30988	132,156,141,227	302,242,268,418	117,137	465,486	566	99	1.19498e-08	8.13995e-06	0.071,0.101,0.084,0.087	0.042,0.047	0.041
3141	ENSG00000187118.8	CMC1	chr3	+	28358243	28358350	28357843	28357914	28360999	28361267	3141	9,0,10,13	44,47,62,102	4,0	72,81	206	99	0.000225886	0.0169708	0.09,0.0,0.072,0.058	0.026,0.0	0.042
4171	ENSG00000139350.7	NEDD1	chr12	+	97328753	97328983	97313762	97313903	97330388	97330416	4171	387,376,189,320	2,2,0,0	396,398	3,10	329	99	0.000315742	0.0217564	0.983,0.983,1.0,1.0	0.975,0.923	0.042
43277	ENSG00000116898.7	MRPS15	chr1	-	36927688	36927764	36926292	36926377	36929406	36929451	43277	257,215,204,276	1,7,1,1	259,261	10,9	175	99	0.000262365	0.0190705	0.993,0.946,0.991,0.994	0.936,0.943	0.042
48159	ENSG00000197448.9	GSTK1	chr7	+	142962353	142962389	142961640	142962185	142964709	142964826	48159	236,213,287,396	2,2,0,9	167,132	11,3	135	99	0.000440896	0.0279315	0.989,0.987,1.0,0.97	0.918,0.97	0.042
52028	ENSG00000014641.13	MDH1	chr2	+	63821621	63821720	63815742	63816180	63826303	63826422	52028	670,639,703,903	9,24,1,3	722,733	23,31	198	99	1.52964e-06	0.000429044	0.974,0.93,0.997,0.993	0.94,0.922	0.042
65932	ENSG00000166411.9	IDH3A	chr15	+	78449249	78449504	78447554	78447617	78449889	78449973	65932	72,74,160,160	348,394,330,595	17,37	236,226	354	99	1.48497e-07	6.21118e-05	0.055,0.05,0.119,0.07	0.02,0.044	0.042
68292	ENSG00000149532.11	CPSF7	chr11	-	61188525	61188602	61187941	61188045	61188861	61189080	68292	1,3,5,14	39,47,58,74	0,1	73,52	176	99	0.000205449	0.0159032	0.014,0.035,0.046,0.096	0.0,0.011	0.042
68458	ENSG00000130731.11	C16orf13	chr16	-	685611	685774	684888	684956	686093	686235	68458	185,201,164,193	0,0,0,0	336,399	6,6	262	99	0.0010151	0.0487931	1.0,1.0,1.0,1.0	0.955,0.962	0.042
3222	ENSG00000171735.14	CAMTA1	chr1	+	6931816	6931900	6885151	6885270	6947713	6947847	3222	302,324,302,369	1,5,1,5	275,304	8,12	183	99	0.000110462	0.0100136	0.994,0.972,0.994,0.976	0.949,0.932	0.043
6854	ENSG00000157193.10	LRP8	chr1	-	53736699	53736825	53732144	53732319	53736898	53737018	6854	137,158,66,90	1,1,0,1	195,122	9,1	225	99	0.000791097	0.0415436	0.984,0.986,1.0,0.975	0.905,0.982	0.043
30994	ENSG00000115677.12	HDLBP	chr2	-	242208368	242208710	242207891	242207956	242212175	242212235	30994	123,133,148,216	302,242,268,418	124,143	465,486	441	99	1.41715e-06	0.000400632	0.084,0.11,0.11,0.104	0.056,0.062	0.043
39063	ENSG00000234741.3	GAS5	chr1	-	173833621	173833644	173833039	173833442	173834647	173834685	39063	570,520,645,830	26,24,23,29	511,619	44,47	122	99	3.97391e-05	0.004914	0.947,0.946,0.958,0.959	0.904,0.914	0.043
48590	ENSG00000172531.10	PPP1CA	chr11	-	67168538	67168703	67168159	67168390	67169198	67169264	48590	1432,1680,1224,1557	33,44,40,31	1395,1374	68,56	264	99	0.00013106	0.0112995	0.942,0.935,0.92,0.95	0.885,0.902	0.043
50313	ENSG00000160209.14	PDXK	chr21	+	45152019	45152528	45139103	45139262	45153949	45154004	50313	65,58,46,65	77,105,151,240	34,33	177,167	608	99	7.35203e-06	0.00142121	0.121,0.083,0.047,0.042	0.03,0.031	0.043
70400	ENSG00000116754.9	SRSF11	chr1	+	70697541	70697658	70694104	70694238	70697950	70698058	70400	18,29,43,56	208,211,168,241	16,19	215,268	216	99	1.28403e-05	0.00214077	0.038,0.059,0.105,0.096	0.033,0.031	0.043
78149	ENSG00000119185.8	ITGB1BP1	chr2	-	9560118	9560229	9558754	9558861	9563501	9563609	78149	140,144,142,172	578,473,390,548	96,112	512,564	210	99	0.000278314	0.0199524	0.102,0.126,0.147,0.129	0.081,0.086	0.043
82389	ENSG00000152700.9	SAR1B	chr5	-	133967766	133967885	133959651	133959727	133968417	133968464	82389	43,57,64,102	459,427,262,408	22,32	341,384	218	99	7.86989e-07	0.000249065	0.041,0.057,0.1,0.102	0.028,0.036	0.043
22976	ENSG00000163507.9	KIAA1524	chr3	-	108300954	108301049	108300261	108300358	108301823	108301930	22976	302,280,133,209	2,1,0,6	323,255	8,11	194	99	0.000330907	0.0225201	0.987,0.993,1.0,0.947	0.954,0.922	0.044
33065	ENSG00000116679.11	IVNS1ABP	chr1	-	185275616	185275757	185274667	185274775	185276145	185276271	33065	49,55,34,47	315,334,114,210	48,41	484,501	240	99	2.29008e-06	0.000578783	0.06,0.064,0.11,0.085	0.039,0.033	0.044
45606	ENSG00000182004.8	SNRPE	chr1	+	203831309	203831350	203830977	203831083	203832790	203832853	45606	892,792,630,790	57,62,21,32	836,843	67,87	140	99	0.000321132	0.0220428	0.917,0.9,0.955,0.946	0.898,0.873	0.044
50013	ENSG00000104529.13	EEF1D	chr8	-	144674816	144675112	144668898	144669019	144679517	144679585	50013	54,45,34,74	163,142,182,247	21,29	246,300	395	99	3.54843e-10	3.72854e-07	0.077,0.074,0.045,0.07	0.021,0.024	0.044
16988	ENSG00000105821.10	DNAJC2	chr7	-	102967778	102967825	102966989	102967131	102968102	102968201	16988	35,35,41,33	288,281,224,362	12,24	336,340	146	99	1.50127e-05	0.00240217	0.076,0.078,0.11,0.058	0.024,0.046	0.045
22587	ENSG00000137868.14	STRA6	chr15	-	74488348	74488488	74486727	74488016	74494495	74494623	22587	719,699,376,539	8,3,2,3	297,301	6,10	239	99	0.000251675	0.0183681	0.974,0.99,0.987,0.987	0.953,0.926	0.045
25990	ENSG00000104852.10	SNRNP70	chr19	+	49605370	49605430	49604646	49604728	49607890	49607992	25990	94,69,81,78	613,658,487,678	39,55	856,884	159	99	4.81088e-10	4.84638e-07	0.087,0.061,0.094,0.067	0.028,0.037	0.045
27982	ENSG00000124164.11	VAPB	chr20	+	57015962	57016139	56993266	56993419	57019132	57019587	27982	505,564,603,819	6,6,3,3	474,583	16,10	276	99	4.71452e-05	0.00555192	0.968,0.971,0.986,0.99	0.914,0.954	0.045
45298	ENSG00000143222.7	UFC1	chr1	+	161127910	161128001	161127406	161127483	161128201	161128646	45298	790,799,915,1245	47,32,26,36	756,769	45,58	190	99	0.000292004	0.0204959	0.898,0.929,0.948,0.947	0.897,0.874	0.045
81129	ENSG00000145920.10	CPLX2	chr5	+	175235991	175236071	175223312	175223787	175305654	175305773	81129	201,160,220,363	1,0,1,5	198,206	9,4	179	99	0.000408901	0.0264432	0.991,1.0,0.992,0.976	0.924,0.966	0.045
27979	ENSG00000124164.11	VAPB	chr20	+	57009657	57009761	56993266	56993419	57019132	57020608	27979	276,236,354,421	6,6,3,3	325,307	16,10	203	99	0.000304678	0.0211365	0.957,0.95,0.983,0.986	0.908,0.937	0.046
32212	ENSG00000165416.10	SUGT1	chr13	+	53232233	53232361	53231666	53231757	53232533	53232603	32212	47,27,97,112	427,430,375,427	27,28	511,522	227	99	6.79634e-12	1.38886e-08	0.046,0.027,0.101,0.103	0.023,0.023	0.046
52691	ENSG00000137094.10	DNAJB5	chr9	+	34990495	34990608	34989741	34989828	34993196	34993441	52691	14,9,12,9	149,125,53,82	0,2	38,48	212	99	0.000978695	0.0476601	0.042,0.033,0.096,0.049	0.0,0.019	0.046
59419	ENSG00000147140.11	NONO	chrX	+	70504246	70504256	70503521	70503571	70510478	70510641	59419	24,41,43,34	317,330,232,318	26,25	407,409	109	99	0.00050061	0.0304954	0.064,0.101,0.144,0.089	0.055,0.053	0.046
65882	ENSG00000100413.12	POLR3H	chr22	-	41929525	41929691	41928662	41928749	41936702	41936799	65882	20,32,42,67	123,104,190,237	18,14	147,176	265	99	1.39506e-05	0.00228357	0.057,0.103,0.076,0.096	0.044,0.029	0.046
72627	ENSG00000161800.8	RACGAP1	chr12	-	50414844	50414960	50410413	50410502	50419110	50419246	72627	10,13,7,13	120,87,92,73	1,2	97,102	215	99	6.72901e-06	0.00132952	0.037,0.064,0.034,0.076	0.005,0.009	0.046
74681	ENSG00000087088.15	BAX	chr19	+	49458804	49459090	49458153	49458219	49459454	49459590	74681	641,655,477,630	3,2,1,5	551,584	7,13	385	99	7.38745e-05	0.00762453	0.982,0.988,0.992,0.97	0.953,0.92	0.046
84467	ENSG00000143919.10	CAMKMT	chr2	+	44776693	44776867	44617379	44617444	44931421	44931482	84467	8,21,8,12	40,54,66,84	4,6	82,66	273	99	0.00094406	0.0466319	0.068,0.124,0.042,0.049	0.017,0.032	0.046
1608	ENSG00000166747.8	AP1G1	chr16	-	71842407	71842580	71823181	71823385	71842665	71842716	1608	16,11,28,57	101,85,105,136	14,9	119,127	272	99	2.46383e-05	0.00344859	0.055,0.045,0.088,0.132	0.041,0.025	0.047
20678	ENSG00000100938.13	GMPR2	chr14	+	24707451	24707611	24706725	24706768	24707794	24707954	20678	429,466,684,885	0,2,1,1	515,635	16,7	259	99	1.62989e-07	6.62364e-05	1.0,0.989,0.996,0.997	0.925,0.972	0.047
22329	ENSG00000138050.10	THUMPD2	chr2	-	39996040	39996233	39995563	39995641	39996849	39997259	22329	44,30,34,39	155,87,110,87	28,36	178,177	292	99	0.000758215	0.0403201	0.088,0.105,0.095,0.132	0.051,0.065	0.047
22459	ENSG00000138303.13	ASCC1	chr10	-	73887839	73887925	73856277	73857208	73892814	73892939	22459	186,242,317,389	5,4,4,5	206,231	4,17	185	99	0.000826559	0.0427468	0.952,0.97,0.977,0.977	0.965,0.879	0.047
23834	ENSG00000110344.5	UBE4A	chr11	+	118245610	118245944	118244208	118244400	118247288	118247409	23834	320,362,496,712	1,5,0,3	420,472	11,4	433	99	0.000764273	0.0405546	0.987,0.943,1.0,0.982	0.897,0.964	0.047
47888	ENSG00000173915.8	USMG5	chr10	-	105155502	105155789	105152127	105152223	105156165	105156198	47888	1149,1014,2026,2748	2442,2332,2430,3008	948,957	2308,2249	386	99	3.68505e-05	0.00464849	0.108,0.1,0.176,0.19	0.095,0.098	0.047
52690	ENSG00000137094.10	DNAJB5	chr9	+	34990344	34990608	34989741	34989828	34993196	34993329	52690	19,14,24,22	149,125,53,82	3,1	38,48	363	99	0.000127236	0.0110711	0.034,0.03,0.11,0.068	0.021,0.006	0.047
17519	ENSG00000153113.19	CAST	chr5	+	96062457	96062563	96058342	96058402	96063192	96063234	17519	22,11,26,47	136,141,134,203	14,7	195,185	205	99	2.17895e-06	0.000558593	0.072,0.036,0.086,0.101	0.034,0.018	0.048
41733	ENSG00000113593.7	PPWD1	chr5	+	64864744	64864821	64863339	64863442	64865458	64865559	41733	12,17,11,14	178,148,91,87	8,0	161,188	176	99	2.61321e-06	0.000640094	0.037,0.061,0.064,0.083	0.027,0.0	0.048
42688	ENSG00000038382.13	TRIO	chr5	+	14507230	14507369	14504501	14504702	14507988	14508785	42688	502,524,591,942	4,15,3,0	263,305	11,7	238	99	0.000205973	0.0159265	0.981,0.936,0.988,1.0	0.909,0.948	0.048
64793	ENSG00000015676.13	NUDCD3	chr7	-	44525129	44525221	44524566	44524883	44530007	44530205	64793	15,3,33,54	152,143,176,234	5,6	178,170	191	99	6.16098e-08	3.06012e-05	0.049,0.011,0.089,0.107	0.014,0.018	0.048
70125	ENSG00000198000.7	NOL8	chr9	-	95082224	95082661	95081502	95081638	95083949	95084028	70125	56,63,62,47	73,79,100,140	48,39	153,124	536	99	0.000229807	0.0171161	0.124,0.128,0.103,0.058	0.055,0.055	0.048
37126	ENSG00000029364.7	SLC39A9	chr14	+	69908548	69908689	69890810	69890919	69908785	69908983	37126	34,20,46,63	121,136,175,262	16,33	221,275	240	99	3.52548e-06	0.000805611	0.104,0.057,0.098,0.09	0.029,0.047	0.049
47500	ENSG00000101337.11	TM9SF4	chr20	+	30745596	30745772	30742905	30742989	30746253	30746317	47500	438,378,384,537	1,0,2,0	338,302	4,9	275	99	5.69692e-05	0.00634923	0.994,1.0,0.986,1.0	0.968,0.924	0.049
57700	ENSG00000214140.6	PRCD	chr17	+	74541977	74542213	74541611	74541718	74549190	74549660	57700	160,146,129,148	358,350,216,302	158,153	540,555	335	99	1.14023e-05	0.00195436	0.117,0.11,0.15,0.127	0.08,0.075	0.049
67637	ENSG00000173171.10	MTX1	chr1	+	155181917	155182010	155180338	155180418	155182175	155182358	67637	592,497,430,517	11,16,14,5	519,445	27,23	192	99	0.000154101	0.0128415	0.965,0.941,0.941,0.982	0.908,0.909	0.049
72412	ENSG00000178982.5	EIF3K	chr19	+	39123240	39123318	39122665	39123136	39125632	39125742	72412	4201,4044,5627,7981	154,168,100,147	3953,4285	254,244	177	99	3.17524e-14	1.41941e-10	0.938,0.931,0.969,0.968	0.897,0.908	0.049
81914	ENSG00000101639.14	CEP192	chr18	+	13103873	13103966	13103507	13103587	13104982	13105078	81914	7,4,0,8	39,32,25,53	0,1	31,45	192	99	0.000901227	0.0451713	0.085,0.061,0.0,0.072	0.0,0.011	0.049
5212	ENSG00000082805.15	ERC1	chr12	+	1519554	1519619	1517314	1517413	1553727	1553755	5212	8,3,6,4	51,64,47,65	1,0	56,68	164	99	0.000532922	0.0316991	0.087,0.028,0.072,0.036	0.011,0.0	0.05
18155	ENSG00000103274.6	NUBP1	chr16	+	10849577	10849610	10846466	10846535	10850546	10850637	18155	248,252,139,221	7,5,3,6	225,243	22,9	132	99	0.000328979	0.0224522	0.964,0.974,0.972,0.965	0.885,0.953	0.05
25730	ENSG00000136521.8	NDUFB5	chr3	+	179332739	179332847	179322598	179322727	179334770	179334832	25730	15,19,21,42	120,85,114,135	11,11	129,121	207	99	0.000298874	0.0208553	0.056,0.097,0.081,0.13	0.039,0.042	0.05
34419	ENSG00000101294.12	HM13	chr20	+	30154012	30154098	30149436	30149539	30156922	30156977	34419	936,911,1303,1778	62,57,21,40	814,869	77,47	185	99	9.99576e-06	0.00179182	0.89,0.895,0.971,0.96	0.85,0.908	0.05
37739	ENSG00000075239.9	ACAT1	chr11	+	107999369	107999928	107998612	107998706	108002633	108002681	37739	13,7,21,16	28,29,20,52	5,5	41,33	658	99	0.000423569	0.0271221	0.065,0.035,0.136,0.044	0.018,0.022	0.05
44424	ENSG00000138668.14	HNRNPD	chr4	-	83276047	83276154	83274986	83275307	83276456	83276554	44424	36,45,56,51	395,354,159,200	28,37	395,394	206	99	1.12027e-05	0.00193075	0.042,0.058,0.145,0.109	0.033,0.043	0.05
80032	ENSG00000168152.8	THAP9	chr4	+	83827013	83827079	83825888	83826084	83827476	83827780	80032	1,3,8,16	22,42,63,68	2,0	37,46	165	99	0.000313531	0.0216489	0.027,0.041,0.071,0.124	0.031,0.0	0.05
25095	ENSG00000183010.12	PYCR1	chr17	-	79892201	79892365	79890259	79891252	79892528	79892621	25095	882,717,1749,2001	56,18,59,77	985,1203	76,63	263	99	0.000788652	0.0415067	0.856,0.937,0.918,0.907	0.83,0.878	0.051
27406	ENSG00000122034.8	GTF3A	chr13	+	28006867	28006941	28004669	28004758	28008275	28008287	27406	1161,1049,2404,3057	61,37,59,58	1512,1584	104,104	173	99	3.39482e-10	3.62405e-07	0.916,0.942,0.959,0.968	0.893,0.897	0.051
28939	ENSG00000074582.8	BCS1L	chr2	+	219526128	219526268	219524378	219524466	219526481	219526639	28939	187,223,246,360	1,1,0,2	159,182	5,4	239	99	0.00101097	0.0487253	0.987,0.989,1.0,0.987	0.929,0.95	0.051
38612	ENSG00000176894.5	PXMP2	chr12	+	133272469	133272632	133266848	133266962	133277835	133277955	38612	318,297,215,310	3,3,1,0	297,302	8,8	262	99	9.02506e-05	0.0087586	0.976,0.974,0.988,1.0	0.933,0.934	0.051
48509	ENSG00000087191.8	PSMC5	chr17	+	61905210	61905283	61904819	61904874	61905497	61905569	48509	71,93,75,76	796,855,443,544	19,22	622,722	172	99	8.88178e-16	5.7751e-12	0.049,0.059,0.089,0.074	0.017,0.017	0.051
57886	ENSG00000214253.4	FIS1	chr7	-	100887287	100887420	100884110	100884187	100888240	100888366	57886	1904,1787,1440,1912	107,94,31,62	1601,1712	90,137	232	99	5.3615e-05	0.00606121	0.884,0.89,0.952,0.929	0.884,0.842	0.051
70512	ENSG00000112200.12	ZNF451	chr6	+	56955630	56955692	56955008	56955072	56963858	56963939	70512	134,150,147,201	2,2,0,0	119,101	5,4	161	99	0.000890858	0.0448716	0.976,0.979,1.0,1.0	0.936,0.939	0.051
18345	ENSG00000140598.9	EFTUD1	chr15	-	82554326	82554689	82554028	82554138	82554954	82555002	18345	5,8,4,11	29,21,25,23	2,2	58,50	462	99	1.85373e-05	0.00278543	0.036,0.075,0.033,0.093	0.007,0.008	0.052
19137	ENSG00000061273.13	HDAC7	chr12	-	48186320	48186452	48185653	48185787	48187151	48187325	19137	6,4,9,16	26,35,52,92	4,1	62,62	231	99	0.00034506	0.0232392	0.09,0.047,0.069,0.069	0.027,0.007	0.052
20164	ENSG00000163214.16	DHX57	chr2	-	39033700	39033835	39029856	39030057	39040962	39041037	20164	331,315,367,485	2,1,4,6	301,362	11,10	234	99	9.16573e-05	0.0088471	0.986,0.993,0.975,0.972	0.92,0.939	0.052
35911	ENSG00000106603.13	COA1	chr7	-	43705256	43705321	43688198	43688251	43769027	43769051	35911	20,30,48,70	225,145,164,235	17,48	282,281	164	99	0.000479879	0.0297167	0.051,0.111,0.15,0.152	0.035,0.093	0.052
53508	ENSG00000120963.7	ZNF706	chr8	-	102214560	102214675	102213834	102213971	102217662	102217960	53508	18,19,51,106	199,179,203,324	9,19	218,221	214	99	4.58207e-08	2.43056e-05	0.04,0.047,0.104,0.131	0.019,0.038	0.052
53510	ENSG00000120963.7	ZNF706	chr8	-	102214560	102214680	102213943	102213971	102217662	102217960	53510	16,19,48,98	199,179,203,324	4,19	218,221	219	99	3.75902e-09	3.03547e-06	0.035,0.046,0.097,0.12	0.008,0.037	0.052
57440	ENSG00000144834.8	TAGLN3	chr3	+	111730609	111730712	111719618	111719793	111732256	111732646	57440	543,498,173,251	6,1,1,0	174,203	12,0	202	99	0.000208097	0.0160525	0.978,0.996,0.988,1.0	0.877,1.0	0.052
76320	ENSG00000175215.5	CTDSP2	chr12	-	58220778	58220880	58220128	58220185	58221316	58221373	76320	197,199,223,258	1,0,0,0	251,356	10,6	201	99	1.47642e-05	0.00237302	0.99,1.0,1.0,1.0	0.925,0.967	0.052
87371	ENSG00000184182.14	UBE2F	chr2	+	238939196	238939254	238933901	238934053	238940862	238940895	87371	380,380,380,526	9,6,3,4	265,254	16,10	157	99	1.05307e-05	0.00185517	0.964,0.976,0.988,0.988	0.913,0.941	0.052
8136	ENSG00000237125.4	HAND2-AS1	chr4	+	174452117	174452229	174451521	174451690	174457998	174458121	8136	896,843,917,1399	6,8,7,7	965,1006	35,33	211	99	4.90052e-13	1.57823e-09	0.986,0.98,0.984,0.989	0.928,0.935	0.053
30859	ENSG00000047621.7	C12orf4	chr12	-	4645182	4645377	4643322	4643468	4647574	4647674	30859	196,181,167,218	2,1,2,0	195,161	8,2	294	99	0.000786037	0.0413995	0.971,0.984,0.966,1.0	0.891,0.964	0.053
43275	ENSG00000116898.7	MRPS15	chr1	-	36926864	36926913	36926292	36926377	36929406	36929451	43275	173,192,166,243	1,7,1,1	203,166	10,9	148	99	7.30116e-05	0.00758234	0.991,0.948,0.991,0.994	0.931,0.925	0.053
51218	ENSG00000102003.6	SYP	chrX	-	49050622	49050818	49049728	49049920	49055426	49055492	51218	1281,1288,1248,1849	60,54,22,20	925,917	55,39	295	99	0.000203751	0.0157888	0.878,0.889,0.95,0.969	0.849,0.888	0.053
53861	ENSG00000109107.9	ALDOC	chr17	-	26902982	26903038	26902438	26902562	26903818	26903966	53861	57,72,21,69	279,227,182,205	41,82	432,460	155	99	0.000343646	0.0231877	0.115,0.168,0.069,0.177	0.057,0.102	0.053
58655	ENSG00000133030.15	MPRIP	chr17	+	17078606	17078726	17077229	17077389	17079739	17079826	58655	224,230,337,457	5,3,1,7	284,287	11,12	219	99	0.000274342	0.0197206	0.953,0.972,0.993,0.967	0.921,0.915	0.053
25013	ENSG00000119900.7	OGFRL1	chr6	+	72006374	72006520	72003235	72003314	72011088	72018653	25013	229,263,90,142	0,4,0,0	173,181	2,8	245	99	0.000648579	0.036412	1.0,0.964,1.0,1.0	0.972,0.901	0.054
30491	ENSG00000087053.14	MTMR2	chr11	-	95620775	95620923	95598764	95598840	95621319	95621425	30491	103,101,73,87	276,240,170,234	45,55	217,219	247	99	0.0002608	0.018976	0.13,0.144,0.147,0.13	0.077,0.091	0.054
47418	ENSG00000196236.8	XPNPEP3	chr22	+	41266051	41266143	41265002	41265119	41277773	41278181	47418	18,26,32,33	98,106,151,206	12,11	145,136	191	99	0.000217608	0.0165375	0.087,0.113,0.099,0.077	0.041,0.04	0.054
57224	ENSG00000185122.6	HSF1	chr8	+	145516164	145516301	145515286	145515556	145532591	145532700	57224	9,26,12,24	83,105,96,152	3,1	96,103	236	99	4.46942e-08	2.42175e-05	0.044,0.094,0.05,0.062	0.013,0.004	0.054
7996	ENSG00000101003.8	GINS1	chr20	+	25394425	25394490	25388362	25388531	25405846	25405963	7996	142,117,33,50	0,1,0,0	130,131	3,7	164	99	0.000396105	0.0257789	1.0,0.986,1.0,1.0	0.963,0.919	0.055
46207	ENSG00000184517.7	ZFP1	chr16	+	75200667	75200794	75186806	75186864	75203150	75203300	46207	148,179,184,237	1,2,2,1	175,145	5,6	226	99	0.000585287	0.0339491	0.985,0.975,0.976,0.99	0.939,0.914	0.055
67486	ENSG00000004455.12	AK2	chr1	-	33477674	33477723	33476355	33476434	33478807	33478888	67486	32,22,41,38	203,208,159,227	16,14	184,233	148	99	7.43912e-05	0.00765577	0.095,0.066,0.147,0.101	0.055,0.039	0.055
67512	ENSG00000106635.3	BCL7B	chr7	-	72954211	72954382	72952263	72952343	72957877	72957931	67512	374,392,285,400	2,5,2,6	246,287	6,12	270	99	0.000660427	0.0368386	0.986,0.966,0.981,0.961	0.938,0.898	0.055
2478	ENSG00000171612.6	SLC25A33	chr1	+	9630315	9630416	9627341	9627419	9640011	9640292	2478	120,105,151,229	1,0,0,1	129,140	3,6	200	99	0.000616405	0.0350459	0.983,1.0,1.0,0.991	0.955,0.92	0.056
11342	ENSG00000248235.2	AC037459.4	chr8	+	22451245	22451345	22447108	22447254	22458394	22458479	11342	20,10,2,13	1,0,1,0	44,25	11,1	199	99	0.000145784	0.0122671	0.909,1.0,0.499,1.0	0.666,0.926	0.056
17317	ENSG00000143952.15	VPS54	chr2	-	64174516	64174624	64171733	64171789	64176170	64176297	17317	230,190,137,185	1,1,0,1	168,168	8,3	207	99	0.000133032	0.0114226	0.991,0.989,1.0,0.989	0.909,0.964	0.056
26820	ENSG00000143774.12	GUK1	chr1	+	228329326	228329530	228328824	228328989	228333211	228333325	26820	84,69,37,57	191,216,154,209	21,29	190,227	303	99	3.6598e-08	2.02917e-05	0.126,0.095,0.073,0.082	0.035,0.04	0.056
51224	ENSG00000102003.6	SYP	chrX	-	49054173	49054298	49049728	49049920	49055426	49055492	51224	1058,1127,1043,1480	60,54,22,20	668,796	55,39	224	99	4.99339e-05	0.00574192	0.886,0.902,0.954,0.97	0.843,0.9	0.056
62010	ENSG00000116539.6	ASH1L	chr1	-	155315753	155315998	155313973	155314064	155316173	155316260	62010	7,7,3,5	37,12,26,35	1,0	13,45	344	99	0.00056831	0.0331868	0.052,0.144,0.032,0.039	0.022,0.0	0.056
70992	ENSG00000170632.9	ARMC10	chr7	+	102737723	102737795	102727076	102727211	102738745	102739092	70992	217,269,262,317	3,5,3,3	134,157	9,5	171	99	0.000985643	0.0478921	0.977,0.969,0.981,0.984	0.896,0.948	0.056
75360	ENSG00000077809.8	GTF2I	chr7	+	74129176	74129236	74125362	74125440	74131213	74131270	75360	90,79,197,276	740,681,836,1065	59,67	862,788	159	99	2.94202e-11	4.47714e-08	0.07,0.067,0.128,0.139	0.041,0.05	0.056
82608	ENSG00000166073.4	GPR176	chr15	-	40153020	40153123	40099206	40099459	40212055	40212152	82608	7,3,9,1	40,20,29,22	4,0	49,68	202	99	0.000806769	0.042113	0.079,0.068,0.132,0.022	0.038,0.0	0.056
4915	ENSG00000151150.16	ANK3	chr10	-	61828394	61836206	61827692	61827767	61840294	61840376	4915	305,394,54,43	56,43,8,18	30,10	23,18	7911	99	5.13145e-13	1.57823e-09	0.064,0.103,0.078,0.029	0.016,0.007	0.057
18868	ENSG00000124243.13	BCAS4	chr20	+	49492533	49492630	49458302	49458437	49493022	49493260	18868	7,6,13,26	58,45,69,76	4,4	52,75	196	99	0.000503068	0.0305965	0.057,0.063,0.087,0.147	0.037,0.026	0.057
33471	ENSG00000131508.11	UBE2D2	chr5	+	138941828	138941992	138940751	138941400	138979956	138980020	33471	113,112,99,157	276,257,253,381	54,58	239,267	263	99	1.3182e-05	0.00218754	0.134,0.141,0.128,0.134	0.078,0.076	0.057
48508	ENSG00000087191.8	PSMC5	chr17	+	61905188	61905283	61904805	61904874	61905497	61905569	48508	90,118,97,100	796,855,443,544	27,27	622,722	194	99	0	0	0.055,0.066,0.101,0.086	0.022,0.019	0.057
50029	ENSG00000104529.13	EEF1D	chr8	-	144676062	144676241	144668898	144669019	144679517	144679564	50029	35,36,38,69	163,142,182,247	17,16	246,300	278	99	2.76401e-12	6.58977e-09	0.071,0.083,0.069,0.09	0.024,0.019	0.057
52685	ENSG00000163714.13	U2SURP	chr3	+	142773784	142773961	142772517	142772636	142775153	142775342	52685	1243,1255,764,1009	50,79,33,32	1171,1141	89,77	276	99	0.000707958	0.0385357	0.899,0.851,0.893,0.919	0.825,0.842	0.057
71359	ENSG00000131089.9	ARHGEF9	chrX	-	62875373	62875617	62863859	62863928	62885765	62885897	71359	222,217,249,348	0,0,0,2	215,254	4,5	343	99	0.000662863	0.0369241	1.0,1.0,1.0,0.98	0.939,0.936	0.057
78117	ENSG00000064763.6	FAR2	chr12	+	29485777	29485841	29485620	29485660	29486564	29487005	78117	50,56,24,46	211,198,192,221	11,27	238,173	163	99	2.18684e-05	0.00317265	0.126,0.147,0.071,0.112	0.027,0.087	0.057
6291	ENSG00000167670.11	CHAF1A	chr19	+	4418016	4418073	4408899	4409756	4422562	4422792	6291	268,262,115,157	5,2,1,2	281,243	8,19	156	99	7.15808e-06	0.00138746	0.971,0.988,0.986,0.98	0.957,0.89	0.058
8348	ENSG00000179950.9	PUF60	chr8	-	144909554	144909706	144906482	144906569	144911449	144911474	8348	21,10,29,58	159,119,108,98	8,16	126,137	251	99	0.000123638	0.0108905	0.05,0.032,0.096,0.189	0.024,0.044	0.058
17502	ENSG00000108296.7	CWC25	chr17	-	36971877	36971994	36971113	36971350	36977153	36977326	17502	8,4,7,10	40,49,60,50	1,0	38,42	216	99	0.000112454	0.0101479	0.084,0.036,0.051,0.084	0.012,0.0	0.058
35236	ENSG00000163806.11	SPDYA	chr2	+	29016728	29016863	29006772	29006844	29022064	29022165	35236	1272,1228,1316,1638	84,88,20,31	1221,1341	77,112	234	99	2.26986e-05	0.00326002	0.865,0.855,0.965,0.957	0.87,0.835	0.058
62957	ENSG00000185133.9	INPP5J	chr22	+	31529083	31529221	31524456	31524640	31529391	31529469	62957	94,92,105,184	0,1,3,0	138,164	2,10	237	99	0.000155259	0.012885	1.0,0.975,0.936,1.0	0.966,0.873	0.058
80218	ENSG00000197961.7	ZNF121	chr19	-	9678323	9678381	9676403	9677785	9678770	9678851	80218	48,58,72,128	211,267,325,402	28,34	230,246	157	99	8.09902e-05	0.00816333	0.125,0.12,0.123,0.167	0.071,0.08	0.058
1800	ENSG00000127616.13	SMARCA4	chr19	+	11144442	11144541	11143757	11144193	11144798	11144822	1800	73,89,109,140	368,315,277,426	61,64	413,404	198	99	1.98938e-06	0.0005193	0.09,0.124,0.164,0.141	0.069,0.073	0.059
14981	ENSG00000003756.12	RBM5	chr3	+	50148111	50148203	50147035	50147121	50150815	50150922	14981	136,198,138,194	0,0,0,1	114,152	4,5	191	99	0.000802639	0.0419649	1.0,1.0,1.0,0.99	0.937,0.94	0.059
21655	ENSG00000141447.12	OSBPL1A	chr18	-	21761108	21761243	21759701	21759799	21776088	21776164	21655	105,75,182,192	0,2,0,0	157,159	9,2	234	99	6.60379e-05	0.0070814	1.0,0.941,1.0,1.0	0.881,0.971	0.059
24998	ENSG00000088812.13	ATRN	chr20	+	3526408	3526537	3520868	3520982	3527930	3528136	24998	199,177,234,332	2,2,1,3	143,206	3,11	228	99	0.000118383	0.0105841	0.977,0.975,0.99,0.98	0.954,0.89	0.059
84079	ENSG00000122386.6	ZNF205	chr16	+	3168905	3169016	3166427	3166548	3169256	3169497	84079	144,156,61,117	1,3,1,0	118,123	6,4	210	99	0.00097887	0.0476601	0.985,0.961,0.966,1.0	0.903,0.935	0.059
16840	ENSG00000204054.7	LINC00963	chr9	+	132264675	132265418	132255756	132255874	132265601	132265951	16840	176,118,172,175	108,86,100,71	110,134	99,127	842	99	0.000686813	0.0378165	0.161,0.139,0.168,0.225	0.116,0.11	0.06
24365	ENSG00000141759.10	TXNL4A	chr18	-	77746601	77746750	77737597	77737701	77748239	77748502	24365	294,271,346,425	362,403,684,759	270,265	636,660	248	99	0.0001368	0.0116647	0.245,0.212,0.168,0.183	0.145,0.138	0.06
26745	ENSG00000182134.11	TDRKH	chr1	-	151746888	151746980	151742582	151743038	151747185	151747282	26745	85,92,81,153	1,1,0,1	99,89	6,2	191	99	0.000967322	0.0473557	0.978,0.979,1.0,0.988	0.895,0.958	0.06
30849	ENSG00000100568.6	VTI1B	chr14	-	68129745	68129907	68129193	68129252	68141091	68141327	30849	78,93,23,43	197,262,54,84	38,39	168,177	261	99	0.000475184	0.0295797	0.131,0.119,0.139,0.163	0.079,0.077	0.06
38305	ENSG00000137478.10	FCHSD2	chr11	-	72726853	72726930	72712034	72712179	72794739	72794785	38305	90,76,106,112	2,1,2,0	104,111	5,6	176	99	0.000681507	0.0376191	0.962,0.977,0.968,1.0	0.921,0.912	0.06
43669	ENSG00000166451.9	CENPN	chr16	+	81056201	81056257	81053704	81053881	81056359	81056490	43669	100,126,45,63	363,304,218,219	72,59	419,357	155	99	6.82726e-05	0.00726656	0.15,0.209,0.116,0.155	0.099,0.095	0.06
70350	ENSG00000145439.7	CBR4	chr4	-	169927035	169927065	169922725	169923356	169927905	169928042	70350	64,50,31,56	255,251,228,352	25,18	237,242	129	99	9.70493e-05	0.00921827	0.162,0.133,0.094,0.109	0.075,0.054	0.06
17166	ENSG00000176915.10	ANKLE2	chr12	-	133310581	133310657	133306818	133306856	133310970	133311161	17166	30,20,16,34	196,211,91,145	13,8	219,271	175	99	5.5288e-08	2.82458e-05	0.08,0.051,0.09,0.117	0.032,0.016	0.061
37292	ENSG00000140612.9	SEC11A	chr15	-	85257961	85258097	85234765	85234875	85259255	85259394	37292	716,703,725,923	1414,1318,1219,1636	407,430	1205,1228	235	99	1.82696e-06	0.000494967	0.176,0.183,0.2,0.192	0.125,0.129	0.061
56377	ENSG00000116138.8	DNAJC16	chr1	+	15891676	15891948	15890777	15890854	15892413	15892494	56377	0,10,7,6	10,28,14,39	0,0	27,25	371	99	6.8635e-05	0.00729428	0.0,0.087,0.118,0.039	0.0,0.0	0.061
66648	ENSG00000171466.5	ZNF562	chr19	-	9770054	9770143	9768684	9768811	9771395	9771497	66648	178,132,203,229	1,7,1,1	100,162	5,9	188	99	0.000497517	0.030414	0.989,0.909,0.991,0.992	0.913,0.905	0.061
79389	ENSG00000162585.12	C1orf86	chr1	-	2124085	2124414	2121018	2121220	2125077	2125349	79389	97,136,39,61	184,138,121,159	47,43	204,184	428	99	5.67527e-07	0.000189681	0.109,0.186,0.069,0.082	0.051,0.051	0.061
25717	ENSG00000167747.9	C19orf48	chr19	-	51302528	51302614	51301960	51302215	51305473	51305506	25717	558,589,357,471	20,11,5,15	467,446	24,34	185	99	1.59406e-05	0.00248069	0.937,0.966,0.974,0.944	0.912,0.875	0.062
66509	ENSG00000140105.13	WARS	chr14	-	100841619	100841687	100835423	100835595	100842596	100842644	66509	47,46,67,107	187,247,175,283	25,25	144,169	167	99	0.000682176	0.0376191	0.13,0.099,0.185,0.183	0.093,0.081	0.062
84608	ENSG00000144840.4	RABL3	chr3	-	120457373	120457514	120449542	120449634	120461308	120461380	84608	37,31,9,14	68,83,69,135	12,4	76,84	240	99	0.00075654	0.040261	0.183,0.133,0.051,0.041	0.061,0.019	0.062
9049	ENSG00000160688.14	FLAD1	chr1	+	154962814	154963004	154962634	154962733	154965188	154965262	9049	583,594,508,811	15,11,6,4	473,475	10,29	289	99	5.36428e-05	0.00606121	0.93,0.949,0.967,0.986	0.942,0.849	0.063
15501	ENSG00000162623.11	TYW3	chr1	+	75204373	75204472	75201872	75202306	75214434	75214506	15501	244,239,81,165	4,0,2,0	194,197	13,5	198	99	5.32278e-06	0.0011035	0.968,1.0,0.953,1.0	0.882,0.952	0.063
29951	ENSG00000140416.15	TPM1	chr15	+	63353396	63353472	63353067	63353138	63353911	63353987	29951	802,916,697,1017	84,110,16,19	429,538	55,50	175	99	0.000521521	0.031293	0.844,0.825,0.961,0.968	0.815,0.859	0.063
35235	ENSG00000163806.11	SPDYA	chr2	+	29011523	29011675	29006772	29006844	29022064	29022165	35235	1355,1271,1313,1818	84,88,20,31	1336,1288	77,112	251	99	9.83771e-06	0.00178135	0.864,0.851,0.963,0.959	0.873,0.819	0.063
38294	ENSG00000137478.10	FCHSD2	chr11	-	72553665	72553886	72552498	72552628	72554195	72554373	38294	134,135,149,184	5,0,0,0	175,179	8,3	320	99	0.000819304	0.0425944	0.892,1.0,1.0,1.0	0.871,0.949	0.063
50021	ENSG00000104529.13	EEF1D	chr8	-	144676044	144676241	144668898	144669019	144679517	144679532	50021	46,47,50,87	163,142,182,247	24,27	246,300	296	99	7.645e-12	1.47784e-08	0.086,0.1,0.084,0.105	0.032,0.029	0.063
51953	ENSG00000060237.12	WNK1	chr12	+	1009641	1009836	1006644	1006847	1017012	1017200	51953	271,225,229,361	0,1,0,0	187,193	5,4	294	99	0.000499247	0.0304937	1.0,0.987,1.0,1.0	0.926,0.942	0.063
16476	ENSG00000177479.15	ARIH2	chr3	+	48982568	48982614	48964150	48965246	48999044	48999112	16476	33,24,20,47	132,122,130,186	13,15	133,155	145	99	0.000305658	0.021184	0.146,0.118,0.095,0.147	0.063,0.062	0.064
58650	ENSG00000133030.15	MPRIP	chr17	+	17046869	17046983	17045940	17046079	17049349	17049406	58650	206,247,351,523	9,6,3,6	212,286	8,22	213	99	2.74725e-05	0.00377148	0.914,0.95,0.982,0.976	0.925,0.858	0.064
85302	ENSG00000177119.11	ANO6	chr12	+	45695796	45695876	45609802	45610174	45725077	45725206	85302	441,468,778,1093	38,68,27,37	318,409	36,52	179	99	0.000678169	0.0375138	0.865,0.792,0.941,0.942	0.83,0.813	0.064
2028	ENSG00000172339.9	ALG14	chr1	-	95507048	95507168	95492684	95492816	95530421	95530573	2028	13,11,15,17	67,49,67,71	2,5	52,65	219	99	0.000156824	0.0129823	0.081,0.092,0.092,0.098	0.017,0.034	0.065
11047	ENSG00000158089.10	GALNT14	chr2	-	31178483	31178605	31168648	31168736	31181262	31181330	11047	119,162,97,178	1,0,0,0	137,154	3,7	221	99	9.85909e-05	0.00929067	0.982,1.0,1.0,1.0	0.953,0.908	0.065
48507	ENSG00000087191.8	PSMC5	chr17	+	61905033	61905283	61904819	61904874	61905497	61905569	48507	211,254,203,235	796,855,443,544	62,79	622,722	349	99	0	0	0.07,0.078,0.115,0.109	0.027,0.03	0.065
8124	ENSG00000237125.4	HAND2-AS1	chr4	+	174451950	174452229	174451608	174451690	174457998	174458121	8124	1135,1087,1098,1702	6,8,7,7	1309,1417	35,33	378	99	1.29649e-11	2.2617e-08	0.98,0.973,0.976,0.985	0.907,0.918	0.066
35901	ENSG00000106603.13	COA1	chr7	-	43695631	43695752	43688198	43688251	43769027	43769104	35901	48,65,107,122	225,145,164,235	80,62	282,281	220	99	0.00043605	0.0277227	0.088,0.168,0.227,0.189	0.113,0.09	0.066
39524	ENSG00000248101.2	AC002116.8	chr19	-	36504245	36504324	36503922	36503991	36505076	36505137	39524	146,145,104,148	4,0,0,1	118,107	4,7	178	99	0.000170452	0.0137291	0.953,1.0,1.0,0.988	0.943,0.895	0.066
51120	ENSG00000128656.9	CHN1	chr2	-	175809897	175809989	175809615	175809671	175816891	175816930	51120	13,10,15,20	135,153,51,72	3,7	117,140	191	99	2.77757e-05	0.0038058	0.048,0.033,0.132,0.126	0.013,0.025	0.066
78130	ENSG00000119185.8	ITGB1BP1	chr2	-	9547577	9547727	9543603	9547034	9548241	9548334	78130	1616,1595,1723,2283	176,169,69,83	1577,1654	186,167	249	99	0.000409552	0.0264614	0.785,0.79,0.908,0.916	0.771,0.797	0.066
81090	ENSG00000176142.8	TMEM39A	chr3	-	119170055	119170164	119165864	119166019	119171293	119171377	81090	5,9,7,10	72,72,25,61	0,1	90,83	208	99	1.63017e-06	0.00045018	0.032,0.056,0.118,0.072	0.0,0.006	0.066
86761	ENSG00000100138.9	NHP2L1	chr22	-	42078359	42078591	42076247	42076368	42084797	42084885	86761	856,723,1301,1801	1315,1192,1421,1877	705,674	1442,1503	331	99	1.23014e-07	5.20618e-05	0.163,0.154,0.215,0.223	0.128,0.118	0.066
6298	ENSG00000138382.9	METTL5	chr2	-	170668966	170669034	170668266	170668368	170671986	170672038	6298	127,124,160,180	1,4,2,2	162,137	7,11	167	99	0.000122034	0.0108292	0.987,0.948,0.979,0.982	0.932,0.881	0.067
79656	ENSG00000158987.15	RAPGEF6	chr5	-	130775838	130775921	130775273	130775408	130778041	130778230	79656	3,0,9,9	51,47,31,43	0,0	38,43	182	99	0.000182481	0.0144698	0.031,0.0,0.136,0.102	0.0,0.0	0.067
8637	ENSG00000128973.7	CLN6	chr15	-	68503986	68504201	68503600	68503656	68510873	68510988	8637	268,219,179,271	1,5,0,2	247,270	7,10	314	99	0.000165155	0.0134784	0.988,0.932,1.0,0.977	0.918,0.895	0.068
9753	ENSG00000111653.15	ING4	chr12	-	6764803	6765079	6762395	6762562	6765892	6765964	9753	24,46,3,1	66,40,64,87	4,1	40,45	375	99	0.000241477	0.0177142	0.088,0.233,0.012,0.003	0.026,0.006	0.068
75072	ENSG00000172775.12	FAM192A	chr16	-	57208080	57208198	57207639	57207781	57219732	57219967	75072	47,46,34,38	178,143,117,112	14,15	120,113	217	99	3.82197e-05	0.00477667	0.108,0.128,0.117,0.134	0.051,0.057	0.068
29452	ENSG00000103202.8	NME4	chr16	+	448207	448394	447198	447313	448989	449123	29452	77,55,33,47	209,154,66,89	47,41	219,240	286	99	2.98179e-06	0.000713275	0.113,0.11,0.148,0.155	0.069,0.056	0.069
46985	ENSG00000141569.6	TRIM65	chr17	-	73888091	73888266	73887893	73887959	73888347	73888384	46985	143,130,91,129	0,0,3,2	157,156	3,10	274	99	0.000237856	0.0175386	1.0,1.0,0.916,0.959	0.95,0.849	0.069
52089	ENSG00000116830.7	TTF2	chr1	+	117626639	117626790	117624449	117624569	117629038	117629144	52089	93,71,58,64	0,1,0,0	118,117	6,2	250	99	0.000506165	0.0306545	1.0,0.966,1.0,1.0	0.886,0.959	0.069
63633	ENSG00000146433.8	TMEM181	chr6	+	158994451	158994555	158957467	158957897	159001971	159002027	63633	162,177,304,398	2,4,4,4	174,214	12,8	203	99	7.99546e-05	0.00809676	0.975,0.956,0.974,0.98	0.876,0.929	0.069
87235	ENSG00000143612.14	C1orf43	chr1	-	154192311	154192413	154186932	154187050	154192817	154193009	87235	2783,2879,2119,2795	329,293,228,347	2352,2348	387,409	201	99	4.54806e-05	0.00544021	0.806,0.829,0.821,0.799	0.75,0.739	0.069
1801	ENSG00000127616.13	SMARCA4	chr19	+	11150133	11150229	11145589	11145808	11151973	11152236	1801	16,12,32,36	104,102,71,121	9,13	156,115	195	99	1.9694e-05	0.00291635	0.072,0.056,0.186,0.131	0.028,0.054	0.07
5500	ENSG00000114770.12	ABCC5	chr3	-	183703091	183703243	183700561	183700795	183705557	183705705	5500	29,40,21,46	119,116,61,89	10,21	131,95	251	99	1.57036e-05	0.00246854	0.088,0.12,0.12,0.169	0.029,0.08	0.07
20850	ENSG00000168802.8	CHTF8	chr16	-	69154955	69155073	69151912	69154552	69166386	69166476	20850	211,215,205,246	5,0,2,4	116,142	2,12	217	99	0.000406037	0.0263286	0.951,1.0,0.979,0.966	0.964,0.844	0.07
36000	ENSG00000167113.6	COQ4	chr9	+	131094431	131094561	131088057	131088160	131095128	131095222	36000	162,159,244,471	1,6,2,0	140,135	7,6	229	99	6.62569e-05	0.00709425	0.986,0.92,0.981,1.0	0.896,0.907	0.07
52692	ENSG00000137094.10	DNAJB5	chr9	+	34990664	34990809	34989637	34989828	34993196	34993441	52692	10,36,21,24	149,125,53,82	3,2	38,48	244	99	0.000140823	0.011958	0.027,0.105,0.138,0.106	0.031,0.017	0.07
1311	ENSG00000164929.12	BAALC	chr8	+	104225146	104225313	104152937	104153285	104240216	104240360	1311	1200,1214,424,652	36,41,18,13	651,672	42,44	266	99	1.67879e-05	0.002583	0.925,0.917,0.898,0.949	0.852,0.85	0.071
51270	ENSG00000188690.8	UROS	chr10	-	127482590	127482957	127477293	127477574	127483448	127483547	51270	84,95,50,81	97,75,107,101	43,62	133,125	466	99	3.83709e-05	0.00478126	0.155,0.212,0.09,0.146	0.064,0.095	0.071
9558	ENSG00000162604.8	TM2D1	chr1	-	62152463	62152567	62149168	62149218	62160368	62160442	9558	53,58,42,67	182,190,119,130	19,23	127,115	203	99	0.000183917	0.0145675	0.124,0.13,0.147,0.201	0.068,0.089	0.072
18259	ENSG00000120509.6	PDZD11	chrX	-	69509104	69509443	69508279	69508363	69509709	69509763	18259	298,306,327,412	0,0,0,1	188,265	4,4	438	99	0.000829994	0.0428934	1.0,1.0,1.0,0.989	0.914,0.937	0.072
24818	ENSG00000129158.6	SERGEF	chr11	-	17868131	17868308	17809742	17809960	17899754	17899791	24818	6,3,4,9	20,25,18,22	0,2	17,26	276	99	0.000942906	0.0466319	0.097,0.041,0.074,0.128	0.0,0.027	0.072
29458	ENSG00000113966.5	ARL6	chr3	+	97484834	97484933	97483364	97483821	97486924	97487074	29458	98,106,177,253	397,413,271,449	62,37	205,250	198	99	0.000280651	0.0200332	0.11,0.114,0.246,0.22	0.131,0.069	0.072
30576	ENSG00000152601.13	MBNL1	chr3	+	152174055	152174150	152173330	152173366	152177059	152177116	30576	397,359,255,381	3,17,0,0	246,248	16,11	194	99	7.92854e-06	0.00149395	0.985,0.915,1.0,1.0	0.887,0.92	0.072
40609	ENSG00000109270.8	LAMTOR3	chr4	-	100815111	100815157	100813156	100813191	100815491	100815533	40609	489,488,352,534	54,45,16,22	358,379	43,58	145	99	0.000131125	0.0112995	0.861,0.881,0.938,0.943	0.85,0.817	0.072
50530	ENSG00000271723.1	MROH7-TTC4	chr1	+	55199301	55199383	55197158	55197373	55203254	55203337	50530	128,143,103,168	1,2,1,2	90,91	5,5	181	99	0.000413216	0.02665	0.986,0.975,0.983,0.979	0.908,0.909	0.072
4741	ENSG00000136527.13	TRA2B	chr3	-	185649364	185649640	185644388	185644522	185655612	185655817	4741	331,323,413,463	552,617,357,446	237,282	522,663	375	99	1.98099e-06	0.000519005	0.137,0.121,0.234,0.215	0.107,0.101	0.073
63726	ENSG00000034152.14	MAP2K3	chr17	+	21199397	21199522	21187983	21188281	21201724	21201756	63726	4,5,4,5	17,30,21,24	0,1	31,26	224	99	0.00039557	0.0257675	0.094,0.069,0.078,0.084	0.0,0.017	0.073
72811	ENSG00000008130.11	NADK	chr1	-	1685489	1685647	1685005	1685088	1685722	1685822	72811	578,407,495,684	18,29,12,20	352,380	26,29	257	99	0.000511698	0.0308002	0.925,0.844,0.941,0.929	0.839,0.835	0.073
37043	ENSG00000119661.10	DNAL1	chr14	+	74125549	74125659	74121549	74121588	74128689	74128745	37043	130,131,230,278	0,0,4,1	165,176	8,7	209	99	5.51446e-06	0.00112656	1.0,1.0,0.965,0.992	0.907,0.923	0.074
24360	ENSG00000141759.10	TXNL4A	chr18	-	77737597	77737701	77732866	77733856	77748239	77748536	24360	1345,1365,1996,2521	68,66,34,43	1922,1957	129,174	203	99	2.42029e-14	1.15406e-10	0.906,0.91,0.966,0.966	0.879,0.846	0.075
25657	ENSG00000115966.12	ATF2	chr2	-	175957270	175957344	175945387	175945493	175957788	175957995	25657	8,10,8,12	31,42,66,93	4,1	68,62	173	99	0.000208686	0.0160525	0.129,0.12,0.065,0.069	0.033,0.009	0.075
28389	ENSG00000155508.9	CNOT8	chr5	+	154239254	154239433	154238248	154238376	154242766	154242955	28389	15,5,6,4	46,14,24,27	2,0	29,31	278	99	4.47253e-05	0.00538869	0.104,0.113,0.082,0.05	0.024,0.0	0.075
35909	ENSG00000106603.13	COA1	chr7	-	43698310	43698743	43696820	43696868	43705256	43705321	35909	3,3,8,6	7,10,15,12	0,0	8,5	532	99	0.000856276	0.043787	0.074,0.053,0.09,0.085	0.0,0.0	0.075
39850	ENSG00000148120.10	C9orf3	chr9	+	97781731	97782515	97767823	97767898	97822975	97823269	39850	583,495,187,326	243,283,121,131	204,229	198,192	883	99	5.14892e-07	0.000172897	0.212,0.164,0.148,0.218	0.104,0.118	0.075
52107	ENSG00000157445.10	CACNA2D3	chr3	+	54871185	54871257	54798244	54798378	54872594	54872675	52107	136,125,107,155	0,1,0,0	107,154	8,4	171	99	1.21179e-05	0.00205384	1.0,0.986,1.0,1.0	0.886,0.957	0.075
6067	ENSG00000170873.14	MTSS1	chr8	-	125570953	125571073	125569921	125570116	125575022	125575233	6067	2,1,10,15	23,29,38,40	0,0	42,24	219	99	6.26351e-06	0.00125488	0.038,0.015,0.106,0.145	0.0,0.0	0.076
7972	ENSG00000006015.13	C19orf60	chr19	+	18700222	18700493	18699804	18699887	18701663	18701743	7972	695,528,503,613	23,20,25,10	597,666	46,32	370	99	0.00097657	0.0476454	0.89,0.876,0.843,0.943	0.776,0.848	0.076
10464	ENSG00000179915.16	NRXN1	chr2	-	50848342	50848387	50847159	50847321	50850451	50850753	10464	2,15,2,0	22,33,21,21	0,1	26,25	144	99	0.000490606	0.0301461	0.059,0.238,0.061,0.0	0.0,0.027	0.076
18415	ENSG00000141452.5	C18orf8	chr18	+	21086933	21087018	21084334	21084411	21087948	21088005	18415	135,117,70,89	2,2,0,0	92,70	9,1	184	99	0.000110177	0.0100066	0.973,0.969,1.0,1.0	0.846,0.974	0.076
47336	ENSG00000107929.10	LARP4B	chr10	-	915948	916023	910093	910210	930386	930446	47336	20,23,22,30	83,86,83,121	11,6	89,94	174	99	0.000109857	0.00999668	0.121,0.132,0.131,0.124	0.066,0.035	0.076
81165	ENSG00000169744.8	LDB2	chr4	-	16675822	16675942	16597325	16597498	16760780	16760883	81165	16,18,10,10	89,107,24,31	6,4	67,71	219	99	0.000667573	0.0370383	0.075,0.071,0.159,0.127	0.039,0.025	0.076
84782	ENSG00000148337.15	CIZ1	chr9	-	130950141	130950213	130947825	130948055	130952966	130953113	84782	108,122,88,128	0,2,0,1	138,91	6,6	171	99	2.59243e-05	0.0035955	1.0,0.972,1.0,0.987	0.93,0.898	0.076
86822	ENSG00000127481.10	UBR4	chr1	-	19472516	19472600	19472286	19472427	19473319	19473494	86822	5,3,1,5	19,17,12,27	1,0	27,30	183	99	0.000794171	0.0416745	0.125,0.087,0.043,0.091	0.02,0.0	0.076
17855	ENSG00000241058.1	NSUN6	chr10	-	18931404	18931484	18905112	18905222	18940057	18940551	17855	56,77,77,124	0,2,3,0	80,75	5,5	179	99	0.000657325	0.0367301	1.0,0.955,0.934,1.0	0.898,0.892	0.077
20767	ENSG00000124194.11	GDAP1L1	chr20	+	42887073	42887247	42885792	42885985	42891869	42891967	20767	444,485,547,741	29,34,21,24	588,616	49,61	273	99	0.000159441	0.0131381	0.847,0.838,0.904,0.918	0.813,0.786	0.077
70226	ENSG00000012061.11	ERCC1	chr19	-	45916934	45917003	45910590	45912983	45920078	45920155	70226	233,274,395,528	12,18,6,24	300,342	30,35	168	99	1.2545e-05	0.00210133	0.92,0.9,0.975,0.928	0.855,0.852	0.077
63123	ENSG00000018189.8	RUFY3	chr4	+	71660511	71660611	71655211	71655309	71665857	71665899	63123	62,90,96,138	1,1,0,0	128,134	8,5	199	99	8.27684e-06	0.00154007	0.969,0.978,1.0,1.0	0.888,0.93	0.078
9084	ENSG00000132740.4	IGHMBP2	chr11	+	68697790	68697902	68696650	68696825	68700766	68700849	9084	13,10,1,2	26,29,19,38	0,2	18,29	211	99	0.000738701	0.0396658	0.19,0.139,0.024,0.024	0.0,0.031	0.079
15895	ENSG00000115317.7	HTRA2	chr2	+	74759745	74759841	74758982	74759052	74759946	74760279	15895	247,210,300,393	13,8,7,3	265,222	17,21	195	99	2.93757e-05	0.00394938	0.906,0.93,0.956,0.985	0.888,0.843	0.079
36453	ENSG00000168575.5	SLC20A2	chr8	-	42328584	42328719	42323294	42323435	42329619	42330172	36453	20,18,35,61	64,41,69,122	16,15	90,69	234	99	0.000223552	0.0168486	0.117,0.157,0.177,0.175	0.07,0.084	0.079
37673	ENSG00000164180.9	TMEM161B	chr5	-	87517490	87517577	87516379	87516536	87521585	87521683	37673	8,10,8,18	62,47,27,41	11,7	109,98	186	99	0.000660813	0.0368386	0.064,0.102,0.136,0.189	0.051,0.037	0.079
46924	ENSG00000013573.12	DDX11	chr12	+	31237516	31237603	31236746	31236995	31237902	31238002	46924	96,100,36,45	1,0,0,0	89,93	7,2	186	99	0.000155082	0.012885	0.981,1.0,1.0,1.0	0.871,0.961	0.079
61501	ENSG00000176986.10	SEC24C	chr10	+	75506387	75506474	75504148	75504195	75506562	75506762	61501	59,55,52,79	148,160,103,134	29,29	109,127	186	99	0.000777394	0.0410652	0.175,0.155,0.212,0.239	0.124,0.108	0.079
11341	ENSG00000248235.2	AC037459.4	chr8	+	22449063	22449181	22447108	22447254	22458394	22458873	11341	38,32,21,24	1,0,1,0	87,116	11,1	217	99	0.000211461	0.0162106	0.945,1.0,0.905,1.0	0.783,0.981	0.08
57100	ENSG00000117335.14	CD46	chr1	+	207940951	207940996	207940357	207940540	207943665	207943707	57100	10,5,21,29	165,155,85,115	4,3	264,262	144	99	1.84227e-11	2.99469e-08	0.04,0.022,0.145,0.148	0.01,0.008	0.08
57279	ENSG00000010404.13	IDS	chrX	-	148583604	148583707	148582479	148582568	148584841	148585019	57279	118,111,80,129	473,475,272,333	28,25	282,264	202	99	5.52437e-11	7.31713e-08	0.109,0.103,0.126,0.16	0.046,0.044	0.08
77821	ENSG00000151779.8	NBAS	chr2	-	15319111	15319240	15307032	15307447	15326865	15327004	77821	198,232,112,177	7,2,2,5	201,270	18,11	228	99	0.000475066	0.0295797	0.925,0.981,0.96,0.939	0.829,0.914	0.08
8139	ENSG00000237125.4	HAND2-AS1	chr4	+	174452117	174452229	174451521	174451690	174503855	174504029	8139	703,693,737,1128	39,28,89,83	803,789	96,106	211	99	5.46608e-05	0.00616649	0.894,0.921,0.795,0.864	0.797,0.777	0.081
44501	ENSG00000077080.5	ACTL6B	chr7	-	100252641	100252742	100247583	100247758	100253043	100253076	44501	105,98,105,121	2,2,1,0	216,213	11,14	200	99	2.00854e-06	0.000522396	0.963,0.96,0.981,1.0	0.907,0.883	0.081
22975	ENSG00000163507.9	KIAA1524	chr3	-	108300954	108300985	108300261	108300358	108301823	108301930	22975	87,83,45,73	2,1,0,6	94,93	8,11	130	99	0.000509603	0.0307554	0.971,0.984,1.0,0.903	0.899,0.866	0.082
70229	ENSG00000012061.11	ERCC1	chr19	-	45917220	45917292	45916691	45917003	45918118	45918218	70229	471,462,694,949	63,80,47,61	453,503	81,92	171	99	0.000160695	0.0132262	0.812,0.77,0.895,0.9	0.764,0.76	0.082
50541	ENSG00000176978.9	DPP7	chr9	-	140007812	140007948	140007657	140007739	140008316	140008480	50541	524,444,531,599	22,7,31,32	514,590	44,54	235	99	3.00818e-05	0.00400664	0.909,0.964,0.878,0.887	0.831,0.822	0.083
57927	ENSG00000197586.8	ENTPD6	chr20	+	25199185	25199250	25198137	25198217	25203473	25203614	57927	129,127,97,154	1,3,3,0	92,101	8,6	164	99	4.64782e-05	0.0055221	0.987,0.962,0.951,1.0	0.874,0.91	0.083
8613	ENSG00000010270.9	STARD3NL	chr7	+	38256625	38256679	38254628	38254706	38256788	38256870	8613	438,450,368,485	34,60,11,18	345,347	48,49	153	99	4.74794e-05	0.00555192	0.893,0.829,0.956,0.946	0.823,0.821	0.084
32661	ENSG00000173085.9	COQ2	chr4	-	84188242	84188361	84184976	84185516	84188738	84188927	32661	18,21,28,25	98,78,66,100	11,2	101,91	218	99	5.8932e-07	0.000195141	0.077,0.109,0.162,0.102	0.047,0.01	0.084
33314	ENSG00000100813.10	ACIN1	chr14	-	23536522	23537880	23535174	23535217	23538684	23538734	33314	841,832,562,867	396,382,201,246	417,459	420,394	1457	99	1.11022e-16	8.82307e-13	0.126,0.129,0.16,0.193	0.063,0.073	0.084
60338	ENSG00000127452.4	FBXL12	chr19	-	9923906	9923950	9920942	9922393	9929220	9929293	60338	15,3,15,10	63,58,50,77	1,3	51,58	143	99	0.000154226	0.0128415	0.142,0.035,0.172,0.082	0.013,0.035	0.084
70231	ENSG00000012061.11	ERCC1	chr19	-	45918118	45918218	45910590	45912983	45920078	45920117	70231	358,333,417,575	12,18,6,24	363,376	30,35	199	99	6.35715e-06	0.00127008	0.937,0.902,0.972,0.923	0.858,0.842	0.084
84783	ENSG00000148337.15	CIZ1	chr9	-	130952607	130952723	130947825	130948055	130952966	130952989	84783	145,119,84,125	0,2,0,1	114,132	6,6	215	99	1.58853e-05	0.00248069	1.0,0.965,1.0,0.983	0.897,0.91	0.084
86663	ENSG00000158161.11	EYA3	chr1	-	28369081	28369161	28365349	28365416	28374893	28374937	86663	85,72,99,137	0,0,2,0	73,89	6,3	179	99	8.36124e-05	0.00833626	1.0,1.0,0.965,1.0	0.871,0.943	0.084
33534	ENSG00000181666.13	HKR1	chr19	+	37835511	37835676	37826070	37826159	37838091	37838218	33534	0,6,3,6	12,13,15,16	0,0	10,12	264	99	0.000726797	0.0391736	0.0,0.148,0.07,0.123	0.0,0.0	0.085
35895	ENSG00000106603.13	COA1	chr7	-	43690091	43690311	43688198	43688251	43769027	43769088	35895	83,71,93,136	225,145,164,235	40,54	282,281	319	99	2.96096e-13	1.0589e-09	0.103,0.132,0.15,0.152	0.042,0.056	0.085
44432	ENSG00000138668.14	HNRNPD	chr4	-	83292680	83292737	83280623	83280792	83294598	83294639	44432	509,468,227,279	74,71,18,42	417,389	92,84	156	99	0.000897895	0.0450991	0.814,0.807,0.889,0.808	0.742,0.746	0.085
64255	ENSG00000157800.13	SLC37A3	chr7	-	140051072	140051251	140048425	140048567	140055467	140055564	64255	191,182,251,396	2,4,6,5	162,153	10,7	278	99	0.000955857	0.0469552	0.971,0.942,0.937,0.966	0.852,0.886	0.085
67605	ENSG00000259264.1	RP11-60L3.1	chr15	+	74501728	74501875	74495045	74495439	74510837	74511202	67605	226,222,54,69	2,1,0,0	102,74	3,4	246	99	0.000935251	0.0464211	0.978,0.989,1.0,1.0	0.932,0.882	0.085
74546	ENSG00000171634.12	BPTF	chr17	+	65925074	65925236	65924470	65924717	65925451	65925603	74546	21,25,34,79	55,63,55,99	16,20	68,79	261	99	0.000186952	0.0147589	0.127,0.131,0.19,0.232	0.082,0.088	0.085
76117	ENSG00000135318.7	NT5E	chr6	+	86200225	86200375	86199211	86199317	86201694	86201895	76117	319,348,33,50	8,5,0,0	564,543	33,21	249	99	5.95442e-05	0.00658244	0.941,0.965,1.0,1.0	0.872,0.911	0.085
82047	ENSG00000166946.9	CCNDBP1	chr15	+	43478017	43478431	43477315	43477805	43481396	43481478	82047	286,231,313,419	4,0,0,0	246,307	6,6	513	99	1.81817e-05	0.00274931	0.932,1.0,1.0,1.0	0.888,0.908	0.085
8639	ENSG00000128973.7	CLN6	chr15	-	68504012	68504201	68503600	68503656	68506627	68506726	8639	787,677,577,814	16,19,4,5	788,829	37,45	288	99	1.47742e-09	1.33761e-06	0.944,0.925,0.98,0.982	0.88,0.864	0.086
8939	ENSG00000185515.10	BRCC3	chrX	+	154327589	154327664	154319058	154319114	154344331	154344458	8939	24,32,24,24	132,111,71,71	12,9	94,129	174	99	1.54416e-05	0.00244347	0.094,0.141,0.161,0.161	0.068,0.038	0.086
30858	ENSG00000047621.7	C12orf4	chr12	-	4645182	4645248	4643322	4643468	4647574	4647674	30858	89,76,73,108	2,1,2,0	67,55	8,2	165	99	0.000186626	0.0147494	0.964,0.979,0.956,1.0	0.834,0.943	0.086
37925	ENSG00000103253.13	HAGHL	chr16	+	778115	778233	777738	778029	778315	778399	37925	83,51,75,92	1,0,1,0	73,108	4,5	217	99	0.000108108	0.00988785	0.974,1.0,0.972,1.0	0.893,0.908	0.086
46096	ENSG00000052126.10	PLEKHA5	chr12	+	19499927	19500116	19498775	19498822	19501332	19501453	46096	12,18,61,43	138,158,73,60	9,5	72,54	288	99	0.000576828	0.0336243	0.029,0.038,0.223,0.198	0.041,0.031	0.086
77300	ENSG00000004487.11	KDM1A	chr1	+	23370919	23370979	23356961	23357127	23376879	23377013	77300	393,376,403,549	303,300,249,378	418,464	475,422	159	99	0.000871355	0.0442786	0.447,0.438,0.502,0.475	0.354,0.406	0.086
42859	ENSG00000164542.8	KIAA0895	chr7	-	36396510	36397199	36375762	36375906	36406719	36406878	42859	249,215,268,357	0,0,0,2	430,443	4,8	788	99	1.74138e-05	0.00264733	1.0,1.0,1.0,0.957	0.931,0.874	0.087
81973	ENSG00000135837.11	CEP350	chr1	+	179959641	179959756	179956374	179956421	179965687	179966310	81973	51,54,62,101	0,0,0,0	84,75	3,4	214	99	0.000992846	0.0481113	1.0,1.0,1.0,1.0	0.928,0.897	0.087
82046	ENSG00000166946.9	CCNDBP1	chr15	+	43478017	43478077	43477454	43477805	43481396	43481478	82046	125,73,93,119	4,0,0,0	74,105	6,6	159	99	2.17324e-05	0.00317265	0.951,1.0,1.0,1.0	0.885,0.916	0.087
9994	ENSG00000119778.10	ATAD2B	chr2	-	24011381	24011517	24008896	24009093	24021007	24021193	9994	116,131,85,114	1,0,0,0	99,88	4,4	235	99	0.00016826	0.0135831	0.98,1.0,1.0,1.0	0.912,0.903	0.088
16255	ENSG00000152942.14	RAD17	chr5	+	68666861	68666998	68665632	68666111	68667280	68667384	16255	46,53,69,87	0,0,0,0	57,90	0,8	236	99	0.00014275	0.0120686	1.0,1.0,1.0,1.0	1.0,0.825	0.088
25234	ENSG00000148468.12	FAM171A1	chr10	-	15257994	15258109	15253641	15256600	15262942	15263059	25234	45,44,60,100	0,0,1,1	87,69	1,7	214	99	0.000426576	0.0272172	1.0,1.0,0.965,0.979	0.976,0.82	0.088
35899	ENSG00000106603.13	COA1	chr7	-	43690210	43690311	43686826	43688251	43769027	43769073	35899	59,47,88,146	225,145,164,235	45,63	282,281	200	99	6.88903e-07	0.000222955	0.115,0.138,0.21,0.235	0.073,0.1	0.088
60756	ENSG00000165801.5	ARHGEF40	chr14	+	21551993	21552209	21550989	21551076	21552911	21553082	60756	241,239,233,314	2,4,2,4	153,189	12,3	315	99	0.00094623	0.0467068	0.974,0.949,0.973,0.961	0.8,0.952	0.088
79146	ENSG00000223745.3	RP4-717I23.3	chr1	-	93802933	93803069	93791325	93791452	93804913	93805093	79146	0,0,7,7	2,3,9,25	0,0	3,12	235	99	0.000693831	0.0380564	0.0,0.0,0.247,0.106	0.0,0.0	0.088
86944	ENSG00000163319.6	MRPS18C	chr4	+	84379498	84379582	84378061	84378111	84380892	84380950	86944	640,603,670,778	82,75,24,23	605,668	92,92	183	99	1.85779e-05	0.00278567	0.809,0.813,0.938,0.948	0.781,0.797	0.088
9559	ENSG00000162604.8	TM2D1	chr1	-	62152463	62152593	62149123	62149218	62160368	62160442	9559	75,98,68,98	182,190,119,130	31,35	127,115	229	99	4.54847e-05	0.00544021	0.151,0.182,0.198,0.246	0.095,0.116	0.089
44096	ENSG00000116353.11	MECR	chr1	-	29527885	29528030	29527027	29527101	29528454	29528557	44096	11,9,29,26	31,31,72,84	5,3	49,50	244	99	1.0871e-05	0.00189183	0.126,0.105,0.14,0.112	0.04,0.024	0.089
50374	ENSG00000114062.13	UBE3A	chr15	-	25653718	25653831	25650607	25650649	25654234	25654354	50374	102,114,48,92	189,187,86,130	61,63	186,201	212	99	2.32478e-05	0.00330571	0.201,0.222,0.207,0.248	0.133,0.128	0.089
72121	ENSG00000106785.10	TRIM14	chr9	-	100854190	100854283	100846636	100850287	100862212	100862258	72121	32,44,20,26	0,1,2,1	41,58	1,11	192	99	0.000849478	0.043523	1.0,0.958,0.838,0.931	0.955,0.731	0.089
77585	ENSG00000169379.11	ARL13B	chr3	+	93722502	93722752	93714717	93714788	93754174	93754280	77585	180,171,161,224	3,4,0,0	193,209	6,10	349	99	0.000112517	0.0101479	0.945,0.924,1.0,1.0	0.901,0.856	0.089
8455	ENSG00000005483.15	KMT2E	chr7	+	104679599	104679716	104678572	104678646	104681285	104681303	8455	5,5,6,5	23,15,19,35	1,0	17,13	216	99	0.000959467	0.0471001	0.091,0.133,0.126,0.061	0.026,0.0	0.09
16378	ENSG00000113552.11	GNPDA1	chr5	-	141391852	141391942	141391476	141391606	141392559	141392592	16378	35,50,73,127	212,185,270,279	15,18	217,200	189	99	3.27985e-11	4.88726e-08	0.08,0.124,0.124,0.193	0.035,0.045	0.09
23858	ENSG00000153317.10	ASAP1	chr8	-	131370262	131370389	131249167	131249240	131414130	131414216	23858	116,109,124,123	0,2,3,3	119,136	9,7	226	99	0.000383093	0.0251841	1.0,0.96,0.948,0.947	0.853,0.895	0.09
72292	ENSG00000177192.9	PUS1	chr12	+	132417266	132417378	132416719	132416857	132423717	132423821	72292	52,39,34,47	89,90,80,112	21,27	120,111	211	99	3.97797e-05	0.004914	0.215,0.169,0.166,0.165	0.076,0.102	0.09
74046	ENSG00000129187.10	DCTD	chr4	-	183837571	183837692	183836613	183836728	183838440	183838542	74046	59,43,60,128	185,138,162,231	16,23	112,175	220	99	1.57962e-08	1.01785e-05	0.126,0.123,0.143,0.2	0.06,0.056	0.09
77932	ENSG00000103121.4	CMC2	chr16	-	81034852	81034939	81030918	81031034	81040338	81040463	77932	42,37,124,159	442,440,210,322	28,37	368,379	186	99	2.19098e-06	0.000559669	0.048,0.043,0.239,0.208	0.039,0.049	0.09
78651	ENSG00000174371.12	EXO1	chr1	+	242016659	242016774	242013710	242013888	242020646	242020784	78651	90,46,28,26	0,0,0,0	91,68	3,4	214	99	0.000819598	0.0425944	1.0,1.0,1.0,1.0	0.933,0.887	0.09
2444	ENSG00000126777.13	KTN1	chr14	+	56139889	56139973	56139646	56139730	56142552	56142636	2444	622,596,622,761	480,510,388,459	812,892	923,846	183	99	0.000145433	0.012252	0.412,0.387,0.464,0.473	0.322,0.363	0.091
10853	ENSG00000138942.11	RNF185	chr22	+	31583032	31583256	31556178	31556289	31588669	31588688	10853	286,225,138,246	3,4,3,4	162,195	9,9	323	99	0.000743041	0.0397794	0.967,0.945,0.934,0.95	0.847,0.869	0.091
11049	ENSG00000158089.10	GALNT14	chr2	-	31178777	31178843	31168648	31168736	31181262	31181330	11049	68,74,53,80	1,0,0,0	64,83	3,7	165	99	1.39761e-05	0.00228357	0.976,1.0,1.0,1.0	0.928,0.877	0.091
28349	ENSG00000164751.10	PEX2	chr8	-	77900542	77900574	77898422	77898532	77912225	77912368	28349	299,304,335,457	29,21,9,13	293,339	48,41	131	99	5.56876e-08	2.82482e-05	0.886,0.916,0.966,0.964	0.822,0.862	0.091
32818	ENSG00000163719.14	MTMR14	chr3	+	9719667	9719742	9719000	9719071	9724861	9724901	32818	131,137,153,178	0,6,2,2	115,97	5,11	174	99	8.75452e-05	0.00860107	1.0,0.929,0.978,0.981	0.929,0.834	0.091
57116	ENSG00000135457.5	TFCP2	chr12	-	51495717	51495808	51493437	51493562	51500307	51500396	57116	76,90,74,120	0,2,0,0	68,54	3,4	190	99	0.000484038	0.0298194	1.0,0.959,1.0,1.0	0.922,0.876	0.091
1357	ENSG00000248710.1	RP11-432B6.3	chr3	-	160166513	160166583	160156019	160156974	160167504	160167617	1357	130,110,68,79	2,4,2,2	121,109	8,13	169	99	0.000175661	0.0140223	0.974,0.942,0.952,0.959	0.899,0.831	0.092
6702	ENSG00000089682.12	RBM41	chrX	-	106359380	106359474	106359091	106359284	106359879	106359998	6702	5,4,3,2	20,28,7,21	0,2	44,48	193	99	0.00074981	0.0399921	0.114,0.068,0.18,0.047	0.0,0.021	0.092
31383	ENSG00000079150.13	FKBP7	chr2	-	179337755	179337869	179334378	179334512	179343005	179343280	31383	9,13,20,10	37,56,30,29	6,11	77,70	213	99	0.000421302	0.0270026	0.102,0.097,0.237,0.138	0.035,0.068	0.092
57185	ENSG00000175970.7	UNC119B	chr12	+	121149392	121149548	121148319	121148521	121151076	121151190	57185	46,47,48,101	126,130,83,122	29,13	96,101	255	99	1.49376e-05	0.00239551	0.124,0.123,0.183,0.243	0.105,0.048	0.092
81974	ENSG00000135837.11	CEP350	chr1	+	179961196	179961356	179956377	179956421	179965687	179966098	81974	93,92,69,119	0,0,0,0	108,80	3,4	259	99	0.00095257	0.0468581	1.0,1.0,1.0,1.0	0.932,0.884	0.092
33992	ENSG00000149476.10	DAK	chr11	+	61103311	61103409	61101020	61102203	61105412	61105555	33992	6,14,27,25	44,59,50,77	5,4	61,56	197	99	2.41331e-05	0.00339116	0.064,0.107,0.213,0.14	0.04,0.035	0.093
47337	ENSG00000107929.10	LARP4B	chr10	-	915952	916023	910062	910210	930386	930446	47337	22,42,38,55	83,86,83,121	22,13	89,94	170	99	0.000241324	0.0177142	0.134,0.221,0.21,0.209	0.126,0.075	0.093
53454	ENSG00000028203.13	VEZT	chr12	+	95692637	95692719	95689826	95690034	95693940	95694338	53454	145,169,106,159	155,176,94,122	165,164	227,244	181	99	0.000978102	0.0476601	0.338,0.344,0.381,0.416	0.284,0.269	0.093
66514	ENSG00000140105.13	WARS	chr14	-	100841619	100841743	100835423	100835595	100842596	100842622	66514	81,85,121,217	187,247,175,283	36,45	144,169	223	99	1.04463e-05	0.00184485	0.161,0.133,0.235,0.254	0.1,0.106	0.093
72546	ENSG00000148219.12	ASTN2	chr9	-	119903604	119903757	119858322	119858430	119976636	119976832	72546	638,647,500,722	70,66,47,76	369,322	66,51	252	99	0.000948843	0.0468023	0.782,0.794,0.807,0.789	0.687,0.713	0.093
17856	ENSG00000241058.1	NSUN6	chr10	-	18937418	18937574	18905112	18905222	18940057	18940551	17856	106,100,102,160	0,2,3,0	112,76	5,5	255	99	0.000278378	0.0199524	1.0,0.951,0.93,1.0	0.897,0.855	0.094
33215	ENSG00000185090.10	MANEAL	chr1	+	38262415	38262492	38261408	38261518	38265515	38266805	33215	315,283,223,294	32,13,7,6	178,196	23,21	176	99	0.000322506	0.0220983	0.847,0.925,0.947,0.965	0.813,0.84	0.094
39596	ENSG00000186283.9	TOR3A	chr1	+	179051853	179052188	179051212	179051522	179054762	179055028	39596	146,151,56,100	1,0,0,1	153,129	4,4	434	99	0.000172435	0.013811	0.971,1.0,1.0,0.958	0.897,0.88	0.094
44226	ENSG00000163660.7	CCNL1	chr3	-	156874724	156874872	156870824	156870945	156876654	156876740	44226	82,75,94,104	84,104,86,127	51,69	128,109	247	99	0.000379784	0.0250511	0.281,0.224,0.305,0.247	0.138,0.202	0.094
66510	ENSG00000140105.13	WARS	chr14	-	100841619	100841740	100835423	100835595	100842596	100842648	66510	68,76,110,196	187,247,175,283	27,39	144,169	220	99	1.89389e-06	0.000503564	0.141,0.122,0.22,0.238	0.078,0.094	0.094
85235	ENSG00000007392.12	LUC7L	chr16	-	278331	278401	277240	277335	279277	279373	85235	48,48,42,41	171,139,87,147	23,25	155,207	169	99	1.16403e-06	0.000344035	0.141,0.168,0.22,0.14	0.08,0.066	0.094
14900	ENSG00000126522.12	ASL	chr7	+	65546789	65546984	65540827	65541080	65547354	65547438	14900	525,509,362,478	25,19,8,13	386,424	29,33	294	99	6.59544e-05	0.0070814	0.876,0.9,0.938,0.925	0.818,0.812	0.095
31021	ENSG00000089063.10	TMEM230	chr20	-	5092145	5092251	5089977	5090091	5093375	5093688	31021	29,20,33,45	50,45,104,145	13,15	83,97	205	99	0.000123402	0.0108831	0.219,0.177,0.133,0.13	0.07,0.069	0.095
64017	ENSG00000111832.8	RWDD1	chr6	+	116893584	116893641	116892725	116892818	116894020	116894148	64017	11,6,0,7	41,25,16,20	2,0	31,44	156	99	4.08064e-05	0.00501485	0.145,0.132,0.0,0.182	0.039,0.0	0.095
65086	ENSG00000142252.6	GEMIN7	chr19	+	45583164	45583287	45582515	45582537	45593364	45593795	65086	294,285,350,464	12,12,10,23	199,273	21,24	222	99	0.000162082	0.0133097	0.916,0.914,0.94,0.9	0.809,0.835	0.095
72868	ENSG00000160072.15	ATAD3B	chr1	+	1425071	1425191	1424583	1424654	1425636	1425804	72868	24,19,25,28	66,61,40,56	6,14	56,59	219	99	0.000524548	0.0314219	0.141,0.123,0.22,0.184	0.046,0.097	0.095
67029	ENSG00000131051.16	RBM39	chr20	-	34328446	34328519	34326889	34326939	34328745	34328809	67029	296,317,270,359	452,482,311,392	196,207	418,455	172	99	7.95041e-06	0.00149395	0.274,0.275,0.333,0.345	0.213,0.208	0.096
67578	ENSG00000158411.6	MITD1	chr2	-	99789876	99789965	99787972	99788109	99790377	99790479	67578	8,7,17,4	52,50,25,19	5,3	60,76	188	99	0.000229909	0.0171161	0.075,0.069,0.264,0.1	0.042,0.02	0.096
14199	ENSG00000162408.10	NOL9	chr1	-	6601889	6601987	6593339	6593501	6609630	6609758	14199	51,37,78,67	0,3,1,0	62,58	7,3	197	99	0.000182132	0.0144581	1.0,0.861,0.975,1.0	0.817,0.907	0.097
23980	ENSG00000173599.9	PC	chr11	-	66725339	66725467	66719766	66719939	66725792	66725815	23980	9,9,15,32	50,40,41,68	3,2	59,45	227	99	3.04952e-07	0.000110159	0.073,0.089,0.138,0.17	0.022,0.019	0.097
33214	ENSG00000185090.10	MANEAL	chr1	+	38262415	38262492	38261408	38261518	38265238	38266120	33214	401,388,265,402	17,33,4,13	240,264	34,23	176	99	1.52467e-05	0.00242075	0.93,0.869,0.974,0.946	0.799,0.866	0.097
64024	ENSG00000111832.8	RWDD1	chr6	+	116895220	116895334	116892651	116892818	116901457	116901523	64024	310,288,109,193	326,307,115,181	231,184	352,351	213	99	1.73986e-05	0.00264733	0.307,0.304,0.306,0.331	0.234,0.196	0.097
81184	ENSG00000105655.14	ISYNA1	chr19	-	18547782	18547915	18547139	18547289	18548408	18548570	81184	66,91,72,136	0,0,1,0	127,129	4,9	232	99	1.19825e-06	0.000350826	1.0,1.0,0.968,1.0	0.931,0.859	0.097
86246	ENSG00000147155.6	EBP	chrX	+	48380580	48380640	48380256	48380295	48382086	48382460	86246	2,5,10,13	47,53,41,28	2,1	78,67	159	99	5.07632e-06	0.00106163	0.026,0.055,0.132,0.224	0.016,0.009	0.097
1684	ENSG00000149256.10	TENM4	chr11	-	78489646	78489673	78482036	78482183	78497942	78498128	1684	11,5,0,4	31,40,10,34	0,0	23,18	126	99	0.000101574	0.00948435	0.218,0.089,0.0,0.085	0.0,0.0	0.098
58653	ENSG00000133030.15	MPRIP	chr17	+	17067422	17071229	17064553	17064670	17075031	17075179	58653	214,221,1185,1796	98,103,124,177	105,152	105,115	3906	99	1.11022e-16	8.82307e-13	0.052,0.052,0.195,0.205	0.025,0.032	0.098
72122	ENSG00000106785.10	TRIM14	chr9	-	100857148	100857311	100846636	100850287	100862212	100862258	72122	115,132,54,99	0,1,2,1	89,95	1,11	262	99	4.11533e-05	0.0050488	1.0,0.98,0.911,0.974	0.971,0.765	0.098
9774	ENSG00000099250.13	NRP1	chr10	-	33491818	33491923	33486548	33486637	33496499	33496553	9774	537,576,357,505	14,14,30,29	253,282	30,30	204	99	5.25352e-06	0.00109549	0.949,0.952,0.852,0.894	0.804,0.82	0.1
47984	ENSG00000057663.8	ATG5	chr6	-	106756238	106756366	106740902	106740981	106763975	106764141	47984	369,319,436,647	47,53,30,43	325,334	52,68	227	99	0.000638318	0.0359488	0.774,0.724,0.864,0.868	0.732,0.682	0.1
72590	ENSG00000147912.8	FBXO10	chr9	-	37575518	37575658	37541552	37541771	37576207	37576346	72590	5,7,10,12	43,28,24,20	1,2	21,33	239	99	0.000230955	0.0171535	0.046,0.094,0.147,0.199	0.019,0.024	0.1
72817	ENSG00000005486.12	RHBDD2	chr7	+	75510682	75510804	75508321	75508578	75511146	75511442	72817	134,155,76,134	192,161,109,134	46,35	80,99	221	99	0.00028972	0.0204052	0.238,0.301,0.238,0.309	0.205,0.137	0.1
2353	ENSG00000135336.10	ORC3	chr6	+	88304244	88304331	88304070	88304125	88311501	88311599	2353	48,60,57,64	176,168,149,203	25,26	257,279	186	99	1.55642e-12	4.11104e-09	0.127,0.16,0.169,0.144	0.049,0.047	0.102
20295	ENSG00000149187.13	CELF1	chr11	-	47493549	47493654	47490365	47490443	47493742	47493909	20295	42,38,54,89	90,88,85,127	24,29	86,126	204	99	1.70941e-05	0.00261807	0.185,0.173,0.236,0.254	0.119,0.1	0.102
33258	ENSG00000196914.4	ARHGEF12	chr11	+	120300420	120300540	120300148	120300226	120302479	120302620	33258	493,562,621,799	80,70,27,39	475,494	75,86	219	99	0.000164032	0.013439	0.736,0.784,0.912,0.903	0.741,0.722	0.102
65415	ENSG00000159921.10	GNE	chr9	-	36236828	36236981	36233916	36234129	36246027	36246479	65415	115,155,118,172	5,5,3,1	196,189	16,14	252	99	0.00010589	0.00975011	0.9,0.924,0.939,0.985	0.828,0.841	0.102
14404	ENSG00000123552.13	USP45	chr6	-	99893672	99894339	99891440	99891538	99912479	99912623	14404	343,418,260,404	1,2,0,1	215,217	6,2	766	99	0.000227828	0.0170273	0.978,0.964,1.0,0.981	0.822,0.933	0.103
20495	ENSG00000198420.5	FAM115A	chr7	-	143579015	143579192	143573200	143573715	143599053	143599248	20495	66,67,77,135	64,70,96,121	53,31	82,80	276	99	0.000244798	0.0179211	0.27,0.256,0.223,0.286	0.188,0.122	0.104
49299	ENSG00000125772.8	GPCPD1	chr20	-	5585009	5585086	5579370	5579467	5591487	5591570	49299	105,101,110,108	7,3,0,0	86,97	10,7	176	99	0.000190591	0.0149636	0.894,0.95,1.0,1.0	0.829,0.886	0.104
9646	ENSG00000073578.12	SDHA	chr5	+	251452	251583	240472	240591	254507	254621	9646	527,515,715,1048	16,13,68,66	584,643	67,76	230	99	2.31946e-06	0.000581833	0.934,0.945,0.819,0.872	0.79,0.785	0.105
17780	ENSG00000167380.12	ZNF226	chr19	+	44669740	44669766	44669236	44669295	44669909	44669960	17780	6,3,3,6	26,48,19,23	1,0	24,30	125	99	0.000394156	0.0257223	0.155,0.047,0.111,0.171	0.032,0.0	0.105
45813	ENSG00000130477.10	UNC13A	chr19	-	17731501	17731531	17729714	17729771	17735637	17735761	45813	12,12,3,13	57,68,21,38	1,4	57,49	129	99	0.000108472	0.00990851	0.139,0.119,0.099,0.208	0.013,0.059	0.105
57038	ENSG00000115841.15	RMDN2	chr2	+	38177653	38177738	38156404	38156872	38201182	38201357	57038	4,0,6,5	18,43,17,15	0,0	14,26	184	99	0.000614811	0.0349831	0.107,0.0,0.16,0.152	0.0,0.0	0.105
63135	ENSG00000255857.1	PXN-AS1	chr12	+	120648732	120648909	120647641	120647737	120650177	120650941	63135	28,42,27,55	55,66,44,48	25,26	87,81	276	99	9.39121e-05	0.00900398	0.154,0.186,0.18,0.291	0.093,0.103	0.105
22656	ENSG00000213297.4	ZNF625-ZNF20	chr19	-	12256072	12257039	12253455	12253551	12258209	12258270	22656	562,582,248,345	0,2,1,0	436,391	5,6	1066	99	1.01313e-05	0.00179364	1.0,0.964,0.958,1.0	0.89,0.858	0.106
57341	ENSG00000134884.9	ARGLU1	chr13	-	107209906	107209964	107209395	107209479	107211779	107212005	57341	67,59,80,140	352,394,194,300	42,33	449,445	157	99	7.61802e-12	1.47784e-08	0.107,0.086,0.206,0.227	0.056,0.045	0.106
59168	ENSG00000184281.10	TSSC4	chr11	+	2423205	2423377	2421857	2422028	2423523	2423680	59168	52,36,45,59	93,84,45,103	13,19	90,56	271	99	8.83854e-06	0.0016145	0.17,0.135,0.268,0.173	0.05,0.11	0.106
75152	ENSG00000153094.17	BCL2L11	chr2	+	111907620	111907724	111881309	111881716	111921709	111921808	75152	11,15,23,31	0,2,0,0	34,31	3,3	203	99	0.000882823	0.0445925	1.0,0.785,1.0,1.0	0.847,0.834	0.106
23740	ENSG00000157326.14	DHRS4	chr14	+	24435140	24435192	24429110	24429212	24435491	24435626	23740	43,40,69,103	2,0,0,1	38,44	3,5	151	99	8.38008e-05	0.00833626	0.934,1.0,1.0,0.985	0.893,0.852	0.107
30157	ENSG00000144677.10	CTDSPL	chr3	+	37988547	37988702	37903450	37903769	38006061	38006163	30157	33,59,29,61	0,0,0,1	53,64	3,3	254	99	0.000717368	0.0388107	1.0,1.0,1.0,0.96	0.873,0.893	0.107
46208	ENSG00000184517.7	ZFP1	chr16	+	75200667	75200811	75186806	75186864	75203150	75203224	46208	81,101,102,131	1,2,2,1	90,75	5,6	243	99	0.000385579	0.0253011	0.971,0.954,0.954,0.982	0.88,0.836	0.107
21886	ENSG00000144452.10	ABCA12	chr2	-	215843527	215843764	215843039	215843190	215845206	215845367	21886	128,133,13,13	0,2,0,1	51,54	6,1	336	99	0.000349122	0.0234686	1.0,0.951,1.0,0.793	0.715,0.941	0.108
25876	ENSG00000182541.13	LIMK2	chr22	+	31655874	31656063	31654276	31654412	31658119	31658225	25876	118,107,49,62	2,0,0,0	61,68	3,3	288	99	0.000820039	0.0425944	0.953,1.0,1.0,1.0	0.875,0.886	0.108
44224	ENSG00000163660.7	CCNL1	chr3	-	156869517	156869719	156868070	156868170	156869965	156870030	44224	55,57,54,107	75,68,59,88	15,45	81,63	301	99	0.00027122	0.0195947	0.194,0.216,0.231,0.286	0.057,0.19	0.108
8109	ENSG00000117153.11	KLHL12	chr1	-	202862366	202862553	202860227	202861787	202863311	202863410	8109	254,195,332,473	0,4,1,3	249,233	14,11	286	99	1.63772e-09	1.44613e-06	1.0,0.944,0.991,0.982	0.86,0.88	0.109
25417	ENSG00000175334.3	BANF1	chr11	+	65770314	65770541	65769726	65769984	65770705	65770806	25417	75,73,114,130	84,76,65,102	62,74	116,107	326	99	9.50067e-05	0.00907245	0.213,0.226,0.348,0.279	0.14,0.174	0.109
80887	ENSG00000078018.15	MAP2	chr2	+	210561640	210561775	210561265	210561472	210565000	210565062	80887	201,196,445,529	13,3,7,11	224,265	20,23	234	99	4.61509e-07	0.000157828	0.867,0.965,0.964,0.953	0.826,0.83	0.109
48538	ENSG00000105341.14	ATP5SL	chr19	-	41939176	41939339	41937223	41938313	41939441	41939578	48538	359,321,172,215	140,138,69,91	218,248	145,155	262	99	0.000415764	0.0267902	0.492,0.468,0.485,0.472	0.362,0.377	0.11
82636	ENSG00000123562.12	MORF4L2	chrX	-	102939608	102939657	102931422	102931979	102940098	102940188	82636	627,598,298,446	30,7,29,14	333,372	27,79	148	99	3.32898e-08	1.87482e-05	0.933,0.983,0.873,0.955	0.892,0.759	0.11
82916	ENSG00000137216.14	TMEM63B	chr6	+	44103064	44103103	44102753	44102833	44104085	44104176	82916	140,110,214,315	14,16,22,19	135,126	24,33	138	99	5.69908e-05	0.00634923	0.878,0.831,0.875,0.922	0.801,0.733	0.11
34580	ENSG00000171604.7	CXXC5	chr5	+	139059431	139059525	139028245	139028430	139059948	139060141	34580	43,44,45,81	91,105,67,98	18,17	55,82	193	99	0.000171076	0.0137484	0.195,0.177,0.256,0.298	0.144,0.096	0.111
48539	ENSG00000105341.14	ATP5SL	chr19	-	41942296	41942377	41939344	41939578	41944122	41944319	48539	418,331,198,279	23,31,9,16	358,375	54,55	180	99	1.12425e-06	0.000335046	0.909,0.854,0.924,0.906	0.785,0.789	0.111
59167	ENSG00000184281.10	TSSC4	chr11	+	2423068	2423377	2421992	2422028	2423523	2423680	59167	108,75,99,123	93,84,45,103	35,50	90,56	408	99	0.000221004	0.0167448	0.22,0.178,0.348,0.225	0.086,0.178	0.111
81086	ENSG00000176142.8	TMEM39A	chr3	-	119154601	119154782	119153608	119153729	119155637	119155663	81086	42,23,44,45	61,69,40,45	12,21	48,56	280	99	0.000932939	0.0463708	0.196,0.105,0.28,0.261	0.081,0.117	0.111
32894	ENSG00000132950.14	ZMYM5	chr13	-	20425494	20425588	20412839	20413125	20425828	20426290	32894	91,80,197,185	0,0,0,2	92,74	4,7	193	99	1.48252e-06	0.000417463	1.0,1.0,1.0,0.979	0.922,0.844	0.112
81215	ENSG00000214435.3	AS3MT	chr10	+	104629840	104629968	104629272	104629350	104632204	104632355	81215	64,58,19,16	3,0,0,0	99,87	8,5	227	99	8.33676e-05	0.00833626	0.903,1.0,1.0,1.0	0.844,0.884	0.112
11651	ENSG00000138757.10	G3BP2	chr4	-	76649239	76649360	76587114	76587233	76649459	76649559	11651	158,192,95,106	143,155,87,107	64,82	119,115	220	99	9.00757e-05	0.0087535	0.332,0.358,0.329,0.308	0.195,0.243	0.113
64981	ENSG00000136840.14	ST6GALNAC4	chr9	-	130672229	130672807	130670596	130670860	130674546	130674959	64981	196,156,86,137	0,2,2,1	163,224	7,5	677	99	0.000798037	0.0418062	1.0,0.919,0.863,0.952	0.773,0.868	0.113
69666	ENSG00000156990.10	RPUSD3	chr3	-	9885148	9885285	9883882	9883927	9885573	9885670	69666	73,63,62,130	2,3,2,2	106,90	8,10	236	99	0.0006543	0.0366183	0.939,0.898,0.929,0.965	0.848,0.791	0.113
15752	ENSG00000171291.4	ZNF439	chr19	+	11977010	11977146	11959626	11959745	11977351	11977412	15752	35,34,29,45	0,2,1,0	72,38	3,5	235	99	0.000702378	0.0383488	1.0,0.877,0.924,1.0	0.91,0.762	0.114
19105	ENSG00000167491.13	GATAD2A	chr19	+	19538504	19538801	19496831	19496947	19576148	19576423	19105	33,31,19,44	30,23,19,29	18,29	36,48	396	99	0.000696838	0.0381628	0.216,0.252,0.2,0.275	0.111,0.131	0.115
29699	ENSG00000183048.7	SLC25A10	chr17	+	79680291	79680536	79679293	79679549	79681982	79682102	29699	91,91,52,49	90,84,54,40	36,33	60,93	344	99	4.53859e-06	0.00098072	0.225,0.238,0.217,0.261	0.147,0.093	0.115
67430	ENSG00000134291.7	TMEM106C	chr12	+	48359064	48359128	48357991	48358206	48361915	48361994	67430	270,241,147,238	25,21,5,13	265,225	34,46	163	99	2.29481e-05	0.00328268	0.868,0.875,0.947,0.917	0.826,0.748	0.115
82562	ENSG00000170633.12	RNF34	chr12	+	121842651	121842916	121840544	121840610	121853961	121854180	82562	35,27,7,22	28,27,42,56	4,10	49,51	364	99	6.21422e-06	0.00125202	0.254,0.214,0.043,0.097	0.022,0.051	0.115
5904	ENSG00000122557.5	HERPUD2	chr7	-	35712810	35712888	35709824	35709938	35733793	35734237	5904	99,86,111,163	6,1,0,2	47,48	2,8	177	99	0.000739901	0.0396713	0.902,0.98,1.0,0.979	0.929,0.77	0.116
17275	ENSG00000169255.9	B3GALNT1	chr3	-	160822572	160822683	160822106	160822194	160823022	160823091	17275	37,36,74,94	150,69,83,112	32,24	108,122	210	99	7.69997e-05	0.00787886	0.104,0.197,0.296,0.283	0.123,0.085	0.116
30489	ENSG00000087053.14	MTMR2	chr11	-	95620775	95620848	95598603	95598840	95621319	95621425	30489	225,234,144,185	276,240,170,234	98,108	217,219	172	99	4.21359e-06	0.000924457	0.319,0.359,0.328,0.313	0.206,0.221	0.116
45449	ENSG00000140859.11	KIFC3	chr16	-	57824841	57824978	57806134	57806200	57828910	57829053	45449	17,32,6,30	46,48,36,63	6,3	60,66	236	99	2.66532e-08	1.56258e-05	0.134,0.219,0.065,0.166	0.04,0.019	0.116
54261	ENSG00000079277.15	MKNK1	chr1	-	47046201	47046299	47039405	47042326	47048899	47049001	54261	41,36,32,28	0,0,1,0	54,42	2,5	197	99	0.000222935	0.0168199	1.0,1.0,0.941,1.0	0.931,0.808	0.116
11886	ENSG00000221926.7	TRIM16	chr17	-	15554404	15555260	15546034	15546130	15584178	15584267	11886	319,326,221,320	0,0,0,1	219,193	2,4	955	99	0.000641727	0.0360724	1.0,1.0,1.0,0.971	0.919,0.833	0.117
12216	ENSG00000183765.16	CHEK2	chr22	-	29092888	29092975	29091697	29091861	29095825	29095925	12216	144,164,127,129	11,9,3,3	185,230	32,20	186	99	7.75535e-05	0.00792419	0.874,0.907,0.958,0.958	0.755,0.86	0.117
14764	ENSG00000169689.10	STRA13	chr17	-	79977385	79977570	79977168	79977257	79977733	79977785	14764	204,203,59,61	168,171,145,198	61,69	245,241	284	99	3.39538e-06	0.000783391	0.297,0.293,0.124,0.097	0.08,0.091	0.117
62105	ENSG00000067177.10	PHKA1	chrX	-	71840574	71840751	71839063	71839155	71842958	71843125	62105	129,138,143,146	4,8,0,0	130,147	8,13	276	99	0.000217859	0.0165375	0.92,0.861,1.0,1.0	0.854,0.802	0.117
25954	ENSG00000100294.8	MCAT	chr22	-	43533086	43533304	43528211	43529492	43537167	43537255	25954	316,350,437,510	27,21,19,34	348,342	50,37	317	99	7.33524e-05	0.00759256	0.785,0.839,0.878,0.824	0.685,0.743	0.118
28928	ENSG00000074582.8	BCS1L	chr2	+	219524759	219524889	219524436	219524466	219526481	219526676	28928	136,132,150,182	1,1,0,2	56,88	5,4	229	99	2.52763e-05	0.00351724	0.983,0.983,1.0,0.975	0.829,0.905	0.118
51812	ENSG00000156475.14	PPP2R2B	chr5	-	146236061	146236146	146080607	146080705	146257564	146257758	51812	43,33,82,98	103,115,164,266	3,5	39,35	184	99	2.28796e-05	0.00327944	0.183,0.134,0.212,0.165	0.04,0.071	0.118
45038	ENSG00000124831.14	LRRFIP1	chr2	+	238647874	238647952	238636518	238636578	238657006	238657042	45038	0,4,1,6	3,10,5,14	0,0	6,7	177	99	0.00066802	0.0370383	0.0,0.183,0.101,0.193	0.0,0.0	0.119
48218	ENSG00000205937.7	RNPS1	chr16	-	2316110	2316217	2314573	2314761	2317663	2317834	48218	19,16,26,62	62,45,95,122	5,2	63,53	206	99	9.8881e-09	6.93369e-06	0.128,0.146,0.116,0.196	0.037,0.018	0.119
67449	ENSG00000198208.7	RPS6KL1	chr14	-	75376245	75376851	75375803	75375893	75377950	75378083	67449	469,425,469,727	1,1,2,1	206,196	5,4	705	99	1.74815e-05	0.00264904	0.985,0.984,0.971,0.99	0.853,0.873	0.119
68221	ENSG00000178904.14	DPY19L3	chr19	+	32958379	32958532	32955633	32955690	32959636	32959719	68221	18,18,17,23	72,48,24,26	9,20	104,96	252	99	1.20881e-05	0.00205366	0.089,0.128,0.218,0.258	0.033,0.076	0.119
38613	ENSG00000176894.5	PXMP2	chr12	+	133272469	133272632	133266848	133266962	133281204	133281484	38613	186,185,129,184	9,7,7,9	191,197	22,22	262	99	0.000243209	0.017823	0.886,0.909,0.874,0.885	0.766,0.772	0.12
42483	ENSG00000147465.7	STAR	chr8	-	38002739	38002833	38001166	38001904	38003480	38003665	42483	47,51,23,55	0,1,0,0	39,39	4,2	193	99	0.000485329	0.0298732	1.0,0.963,1.0,1.0	0.833,0.909	0.12
72624	ENSG00000161800.8	RACGAP1	chr12	-	50414844	50414960	50410413	50410498	50419110	50419246	72624	9,8,4,8	23,30,12,15	0,3	24,23	215	99	0.000221637	0.0167555	0.153,0.109,0.133,0.197	0.0,0.057	0.12
9776	ENSG00000099250.13	NRP1	chr10	-	33491839	33491923	33486577	33486637	33496499	33496644	9776	336,341,264,299	14,14,30,29	177,178	30,30	183	99	2.35784e-05	0.00333945	0.928,0.929,0.826,0.848	0.761,0.762	0.121
43477	ENSG00000164924.13	YWHAZ	chr8	-	101964156	101964353	101960823	101961128	101965496	101965616	43477	1554,1690,1736,2637	98,89,59,124	1334,1531	146,171	296	99	3.07299e-12	7.09007e-09	0.841,0.864,0.908,0.877	0.753,0.75	0.121
72175	ENSG00000132781.13	MUTYH	chr1	-	45795560	45795740	45794913	45795109	45796187	45796229	72175	3,11,2,10	13,17,8,15	1,0	14,22	279	99	5.30814e-06	0.0011035	0.076,0.187,0.081,0.191	0.025,0.0	0.121
78639	ENSG00000037897.12	METTL1	chr12	-	58163554	58163739	58163347	58163461	58164876	58165040	78639	220,218,225,350	14,7,1,10	197,198	19,16	284	99	0.000102629	0.00955782	0.846,0.916,0.987,0.924	0.783,0.812	0.121
8636	ENSG00000128973.7	CLN6	chr15	-	68503986	68504201	68503600	68503656	68506627	68506726	8636	580,473,395,568	16,19,4,5	539,603	37,45	314	99	2.3183e-09	1.97398e-06	0.92,0.887,0.969,0.973	0.821,0.809	0.122
38614	ENSG00000176894.5	PXMP2	chr12	+	133277835	133277955	133266845	133266962	133281204	133281486	38614	188,159,113,215	9,7,7,9	170,175	22,22	219	99	4.93953e-05	0.00568953	0.904,0.911,0.879,0.915	0.777,0.782	0.123
68003	ENSG00000122644.8	ARL4A	chr7	+	12727259	12727353	12726480	12726668	12727793	12728539	68003	0,6,4,2	5,11,10,9	0,0	14,19	193	99	0.000141189	0.011958	0.0,0.219,0.17,0.102	0.0,0.0	0.123
18028	ENSG00000126453.5	BCL2L12	chr19	+	50173472	50173745	50172280	50172372	50176954	50177116	18028	75,43,16,16	0,0,0,1	82,121	5,6	372	99	6.15624e-06	0.00124736	1.0,1.0,1.0,0.81	0.814,0.843	0.124
33060	ENSG00000177410.8	ZFAS1	chr20	+	47897439	47897501	47897021	47897107	47905581	47905797	33060	1573,1648,1282,1778	629,663,401,535	1306,1375	792,774	161	99	1.11493e-07	4.83298e-05	0.606,0.605,0.663,0.671	0.503,0.522	0.124
15834	ENSG00000125648.10	SLC25A23	chr19	-	6452322	6452490	6444161	6444312	6454333	6454416	15834	75,51,116,154	1,2,4,0	134,138	12,10	267	99	1.174e-05	0.00200405	0.965,0.904,0.915,1.0	0.805,0.837	0.125
54941	ENSG00000100796.13	SMEK1	chr14	-	91932604	91932760	91931593	91931763	91937180	91937339	54941	51,45,55,100	224,229,56,79	41,38	218,232	255	99	2.92271e-05	0.00394422	0.081,0.071,0.276,0.33	0.068,0.06	0.126
4705	ENSG00000122884.8	P4HA1	chr10	-	74804738	74804809	74803644	74803715	74806682	74806859	4705	104,114,109,133	283,230,97,149	97,113	303,347	170	99	0.000170969	0.0137484	0.176,0.224,0.396,0.342	0.157,0.159	0.127
6938	ENSG00000151422.8	FER	chr5	+	108290429	108290633	108281830	108281923	108294925	108295048	6938	105,131,120,162	7,4,1,2	98,145	10,10	303	99	0.00101318	0.048767	0.831,0.915,0.975,0.964	0.762,0.826	0.127
27475	ENSG00000070495.10	JMJD6	chr17	-	74717344	74717433	74716441	74716580	74717879	74718015	27475	2,1,7,3	14,16,9,11	1,1	162,169	188	99	5.05199e-06	0.00105964	0.07,0.032,0.291,0.126	0.003,0.003	0.127
39278	ENSG00000164576.7	SAP30L	chr5	+	153832015	153832055	153830650	153830773	153832961	153833060	39278	21,33,20,30	109,133,49,88	9,9	159,118	139	99	1.03054e-08	7.08733e-06	0.121,0.15,0.225,0.195	0.039,0.052	0.127
74055	ENSG00000129187.10	DCTD	chr4	-	183837875	183838010	183836613	183836728	183838463	183838514	74055	23,23,24,54	39,30,53,74	5,10	31,37	234	99	0.00020248	0.0157074	0.2,0.245,0.161,0.236	0.064,0.103	0.127
81214	ENSG00000214435.3	AS3MT	chr10	+	104629561	104629602	104629272	104629350	104632204	104632355	81214	42,26,5,10	3,0,0,0	45,64	8,5	140	99	0.000141274	0.011958	0.908,1.0,1.0,1.0	0.799,0.901	0.127
83533	ENSG00000115020.12	PIKFYVE	chr2	+	209150449	209150657	209138307	209138457	209163364	209163503	83533	68,44,74,82	0,2,0,1	54,41	2,4	307	99	0.000813074	0.0423865	1.0,0.876,1.0,0.964	0.897,0.768	0.127
16074	ENSG00000049540.12	ELN	chr7	+	73480273	73480327	73480023	73480062	73482986	73483030	16074	7,11,4,0	1,0,0,1	5,8	7,1	153	99	0.000739913	0.0396713	0.819,1.0,1.0,0.0	0.316,0.838	0.128
16375	ENSG00000113552.11	GNPDA1	chr5	-	141391852	141391904	141391476	141391606	141392559	141392595	16375	50,63,79,134	212,185,270,279	18,16	217,200	151	99	1.05027e-13	4.4188e-10	0.134,0.183,0.161,0.239	0.052,0.05	0.128
19762	ENSG00000140545.10	MFGE8	chr15	-	89442886	89443042	89441915	89442763	89444781	89444966	19762	103,87,62,72	3,2,2,1	111,121	6,16	255	99	0.000165917	0.013516	0.93,0.944,0.923,0.965	0.878,0.746	0.128
45930	ENSG00000006625.13	GGCT	chr7	-	30540151	30540297	30538418	30538554	30544184	30544415	45930	595,524,795,1049	170,145,109,110	819,876	290,266	245	99	0.000971804	0.0474777	0.586,0.594,0.747,0.794	0.533,0.571	0.128
63007	ENSG00000169919.12	GUSB	chr7	-	65439905	65440058	65439512	65439691	65441001	65441189	63007	147,146,81,95	82,98,46,46	70,96	67,101	252	99	0.000406392	0.0263286	0.413,0.369,0.409,0.448	0.291,0.272	0.128
78967	ENSG00000063241.3	ISOC2	chr19	-	55967002	55967212	55966626	55966697	55967715	55967856	78967	538,514,552,780	95,103,77,86	530,649	152,161	309	99	3.99053e-05	0.00492101	0.645,0.615,0.697,0.744	0.528,0.564	0.129
80788	ENSG00000134262.8	AP4B1	chr1	-	114445259	114445356	114444376	114444507	114447226	114447466	80788	73,62,55,60	0,1,0,1	34,61	3,5	196	99	3.08026e-05	0.00408575	1.0,0.969,1.0,0.968	0.851,0.86	0.129
1320	ENSG00000125826.15	RBCK1	chr20	+	401514	401650	400201	400375	402770	402882	1320	5,9,2,7	12,12,6,17	2,0	11,14	235	99	0.00054093	0.0320133	0.149,0.24,0.123,0.148	0.071,0.0	0.13
3738	ENSG00000197713.10	RPE	chr2	+	210868161	210868192	210867351	210867507	210880696	210880836	3738	2,4,1,5	22,14,7,12	1,0	23,18	130	99	0.000815646	0.0424587	0.065,0.179,0.098,0.241	0.032,0.0	0.13
17523	ENSG00000153113.19	CAST	chr5	+	96062497	96062563	96058342	96058402	96063192	96063234	17523	42,36,81,95	136,141,134,203	21,22	195,185	165	99	1.05233e-10	1.27571e-07	0.156,0.133,0.266,0.219	0.061,0.067	0.13
80654	ENSG00000008710.13	PKD1	chr16	-	2163041	2163060	2162788	2162964	2163161	2163293	80654	11,11,5,10	36,29,46,52	1,1	21,24	118	99	0.000483618	0.0298192	0.204,0.241,0.084,0.139	0.038,0.034	0.131
2964	ENSG00000104177.13	MYEF2	chr15	-	48444430	48444481	48444070	48444139	48445988	48446090	2964	441,453,387,501	114,123,84,107	368,415	151,193	150	99	5.79986e-07	0.000192944	0.719,0.709,0.753,0.756	0.617,0.587	0.132
12520	ENSG00000163029.11	SMC6	chr2	-	17934244	17934331	17927093	17927218	17934892	17935040	12520	36,26,24,33	42,56,32,48	19,26	79,75	186	99	0.000201595	0.0156557	0.313,0.198,0.285,0.268	0.113,0.156	0.132
52244	ENSG00000091129.15	NRCAM	chr7	-	107866088	107866145	107864168	107864280	107866651	107866822	52244	728,828,888,1094	96,95,34,36	520,640	99,134	156	99	4.06875e-12	9.09415e-09	0.828,0.847,0.943,0.951	0.769,0.752	0.132
77373	ENSG00000167615.12	LENG8	chr19	+	54962466	54962559	54960367	54960484	54963269	54963444	77373	47,58,36,64	2,2,0,1	37,40	2,7	192	99	0.000765748	0.0405999	0.924,0.937,1.0,0.971	0.905,0.747	0.132
12140	ENSG00000237187.4	NR2F1-AS1	chr5	-	92905595	92905708	92899069	92899169	92916847	92917003	12140	7,8,8,5	38,57,8,16	1,0	16,21	212	99	0.000164609	0.0134655	0.079,0.062,0.318,0.127	0.028,0.0	0.133
45806	ENSG00000156313.8	RPGR	chrX	-	38163887	38164043	38160499	38160624	38169867	38170026	45806	52,89,53,61	0,0,0,0	54,65	5,2	255	99	0.000109067	0.00995017	1.0,1.0,1.0,1.0	0.807,0.927	0.133
17892	ENSG00000134490.9	TMEM241	chr18	-	20953675	20953727	20936557	20936627	20957609	20957635	17892	32,30,29,27	0,0,0,0	25,23	6,0	151	99	0.00090678	0.0454177	1.0,1.0,1.0,1.0	0.732,1.0	0.134
85364	ENSG00000181019.8	NQO1	chr16	-	69748866	69748980	69746930	69747032	69752025	69752156	85364	209,214,251,344	8,21,11,18	126,122	18,19	213	99	0.00010175	0.00948837	0.924,0.826,0.914,0.899	0.765,0.749	0.134
10198	ENSG00000197343.6	ZNF655	chr7	+	99159510	99159596	99158129	99158318	99169867	99174062	10198	14,16,25,35	51,58,47,71	2,9	84,76	185	99	3.77715e-09	3.03547e-06	0.128,0.129,0.222,0.209	0.013,0.06	0.135
30699	ENSG00000126091.15	ST3GAL3	chr1	+	44257772	44257820	44201903	44202096	44280562	44280605	30699	23,26,20,26	2,0,0,0	23,30	6,1	147	99	0.000267276	0.0193679	0.886,1.0,1.0,1.0	0.721,0.953	0.135
66668	ENSG00000171914.10	TLN2	chr15	+	63011965	63012079	63009774	63009888	63014551	63014686	66668	34,45,43,80	2,0,0,0	40,50	5,3	213	99	3.55637e-05	0.00452722	0.888,1.0,1.0,1.0	0.788,0.886	0.135
33951	ENSG00000256053.3	APOPT1	chr14	+	104029551	104029716	104029389	104029461	104037959	104038157	33951	74,83,124,206	93,123,157,164	31,41	111,109	264	99	1.47906e-08	9.61711e-06	0.23,0.202,0.229,0.32	0.095,0.124	0.136
36490	ENSG00000171469.6	ZNF561	chr19	-	9728296	9728434	9727720	9727847	9728766	9728855	36490	53,64,77,95	45,48,53,57	39,41	54,56	237	99	0.000445901	0.0281737	0.33,0.358,0.378,0.41	0.232,0.234	0.136
56230	ENSG00000180098.5	TRNAU1AP	chr1	+	28887624	28887772	28887144	28887244	28887857	28887910	56230	23,33,6,12	33,36,15,20	13,7	45,80	247	99	4.14831e-07	0.000144031	0.218,0.269,0.138,0.194	0.104,0.034	0.136
8026	ENSG00000080823.17	MOK	chr14	-	102698043	102698158	102695550	102695994	102698871	102699008	8026	351,311,291,372	101,102,66,64	256,257	97,132	214	99	0.000230023	0.0171161	0.617,0.585,0.671,0.729	0.55,0.474	0.138
53276	ENSG00000183137.10	CEP57L1	chr6	+	109421394	109421489	109416355	109416778	109461623	109461878	53276	2,10,10,11	21,23,11,25	0,5	36,26	194	99	0.00031433	0.02168	0.046,0.182,0.317,0.183	0.0,0.089	0.138
82639	ENSG00000123562.12	MORF4L2	chrX	-	102939608	102939657	102933426	102933579	102940098	102940188	82639	890,864,417,625	639,589,429,613	489,540	791,769	148	99	8.56488e-08	4.00389e-05	0.482,0.495,0.394,0.405	0.293,0.32	0.138
83885	ENSG00000146872.13	TLK2	chr17	+	60601596	60601692	60600494	60600538	60613530	60613698	83885	88,87,86,103	75,69,65,82	54,40	72,70	195	99	0.000239517	0.0176247	0.373,0.39,0.402,0.389	0.276,0.225	0.138
4503	ENSG00000149527.13	PLCH2	chr1	+	2428940	2429048	2428266	2428449	2429961	2430086	4503	15,14,6,11	1,0,0,0	55,47	3,7	207	99	2.25214e-05	0.00324109	0.878,1.0,1.0,1.0	0.898,0.763	0.139
8108	ENSG00000162374.12	ELAVL4	chr1	+	50663100	50663139	50661232	50661458	50666522	50667071	8108	286,354,261,323	71,42,18,15	174,126	43,38	138	99	1.57568e-05	0.00247146	0.743,0.858,0.912,0.939	0.744,0.704	0.139
10876	ENSG00000161996.13	WDR90	chr16	+	712672	712844	712219	712331	715678	715801	10876	34,45,27,34	0,0,0,0	52,61	2,5	271	99	6.59841e-05	0.0070814	1.0,1.0,1.0,1.0	0.905,0.817	0.139
13890	ENSG00000103319.7	EEF2K	chr16	+	22261974	22262012	22260075	22260136	22268068	22268218	13890	33,34,55,80	0,0,2,2	33,32	3,6	137	99	5.26724e-05	0.00598942	1.0,1.0,0.952,0.967	0.888,0.794	0.139
16076	ENSG00000049540.12	ELN	chr7	+	73481061	73481106	73480023	73480062	73482986	73483030	16076	66,31,8,27	1,0,0,1	26,42	7,1	144	99	0.00012517	0.010958	0.978,1.0,1.0,0.949	0.719,0.967	0.139
42244	ENSG00000006042.7	TMEM98	chr17	+	31258492	31258677	31254927	31255255	31260191	31260323	42244	46,36,5,7	1,0,0,0	48,46	2,4	284	99	0.000341246	0.0230675	0.941,1.0,1.0,1.0	0.893,0.8	0.139
86247	ENSG00000147155.6	EBP	chrX	+	48380580	48380640	48380256	48380295	48382141	48382460	86247	1,6,8,22	46,28,16,34	2,1	39,34	159	99	5.63636e-05	0.00631681	0.013,0.118,0.237,0.287	0.031,0.018	0.139
1310	ENSG00000164929.12	BAALC	chr8	+	104212885	104212990	104152986	104153285	104240216	104240446	1310	27,26,11,5	36,41,18,13	7,9	42,44	204	99	5.47861e-05	0.00617089	0.267,0.235,0.229,0.157	0.075,0.09	0.14
8408	ENSG00000140157.10	NIPA2	chr15	-	23033277	23033413	23021391	23021429	23033893	23034006	8408	189,193,150,151	14,17,8,11	131,98	20,18	235	99	0.000791025	0.0415436	0.85,0.827,0.888,0.853	0.734,0.696	0.14
27502	ENSG00000015479.13	MATR3	chr5	+	138615623	138615747	138614739	138614818	138629141	138629264	27502	92,75,133,220	16,13,6,21	175,181	36,49	223	99	0.000688509	0.0378516	0.719,0.719,0.908,0.823	0.683,0.621	0.14
54608	ENSG00000089123.11	TASP1	chr20	-	13581189	13581264	13567896	13568017	13604092	13604161	54608	2,6,11,21	19,10,23,67	3,1	45,30	174	99	2.82806e-05	0.00383821	0.057,0.254,0.214,0.151	0.037,0.019	0.141
56563	ENSG00000147535.12	PPAPDC1B	chr8	-	38125888	38125979	38125414	38125478	38126399	38126508	56563	98,118,128,200	2,6,0,2	60,64	6,8	190	99	1.38493e-05	0.00227956	0.962,0.911,1.0,0.981	0.839,0.807	0.141
79718	ENSG00000113240.8	CLK4	chr5	-	178044344	178044435	178043882	178043949	178045556	178045779	79718	117,143,111,158	6,8,8,10	85,100	10,23	190	99	0.000273867	0.0197063	0.91,0.903,0.878,0.892	0.816,0.694	0.141
20849	ENSG00000168802.8	CHTF8	chr16	-	69154955	69155073	69151912	69154552	69155338	69155395	20849	350,340,321,414	136,104,86,116	173,213	100,110	217	99	2.91204e-05	0.00393726	0.54,0.599,0.63,0.62	0.441,0.469	0.142
63994	ENSG00000067715.9	SYT1	chr12	+	79320376	79320500	79258777	79258889	79349241	79349346	63994	28,35,24,28	95,48,39,36	3,6	25,30	223	99	0.000226714	0.0169974	0.116,0.245,0.215,0.257	0.051,0.082	0.142
75074	ENSG00000172775.12	FAM192A	chr16	-	57208080	57208198	57207639	57207781	57219942	57220028	75074	47,34,28,33	40,43,44,48	9,17	38,42	217	99	0.000341389	0.0230675	0.349,0.265,0.225,0.239	0.098,0.156	0.142
76823	ENSG00000055070.12	SZRD1	chr1	+	16717869	16717919	16693577	16693803	16719722	16719880	76823	84,91,157,123	90,85,80,94	68,74	98,107	149	99	0.000834426	0.0430602	0.383,0.416,0.566,0.465	0.316,0.315	0.142
8635	ENSG00000128973.7	CLN6	chr15	-	68503893	68504201	68503600	68503656	68506627	68506705	8635	594,503,412,566	16,19,4,5	563,629	37,45	407	99	5.14611e-09	3.9612e-06	0.9,0.866,0.962,0.965	0.787,0.773	0.143
56583	ENSG00000205581.6	HMGN1	chr21	-	40719304	40719409	40717755	40717884	40720217	40720265	56583	125,135,180,236	27,31,34,50	86,106	35,40	204	99	0.000925662	0.046041	0.692,0.679,0.72,0.696	0.544,0.563	0.143
31699	ENSG00000183044.7	ABAT	chr16	+	8829555	8829666	8768421	8768568	8839857	8839882	31699	108,79,98,102	2,3,5,5	113,112	16,14	210	99	3.49205e-05	0.00448808	0.962,0.925,0.902,0.906	0.769,0.79	0.144
47390	ENSG00000065802.7	ASB1	chr2	+	239344351	239344654	239341954	239342336	239352982	239353016	47390	348,374,327,431	12,13,17,16	231,256	25,22	402	99	4.83894e-05	0.00560941	0.877,0.876,0.826,0.869	0.695,0.741	0.144
26515	ENSG00000167889.8	MGAT5B	chr17	+	74928726	74928857	74922678	74922812	74934069	74934225	26515	101,111,47,59	1,3,2,0	112,91	10,10	230	99	4.89472e-06	0.00103117	0.978,0.941,0.91,1.0	0.828,0.797	0.145
58644	ENSG00000132639.8	SNAP25	chr20	+	10279915	10280060	10258332	10258374	10286776	10288066	58644	266,235,207,281	9,15,8,31	195,217	29,34	244	99	2.81647e-05	0.00382976	0.923,0.864,0.913,0.786	0.732,0.721	0.145
26185	ENSG00000102935.7	ZNF423	chr16	-	49856580	49856649	49823397	49823457	49889645	49890046	26185	8,7,4,16	22,20,13,28	0,4	14,26	168	99	0.000887877	0.0447846	0.176,0.171,0.153,0.252	0.0,0.083	0.146
33193	ENSG00000070610.10	GBA2	chr9	-	35741668	35741887	35740821	35741061	35744293	35744409	33193	447,476,432,618	31,20,14,17	357,384	40,43	318	99	9.64844e-08	4.36769e-05	0.818,0.881,0.906,0.919	0.735,0.735	0.146
42243	ENSG00000006042.7	TMEM98	chr17	+	31258344	31258677	31255062	31255255	31260191	31260323	42243	58,51,5,8	1,0,0,0	72,62	2,4	432	99	0.000285559	0.0202093	0.93,1.0,1.0,1.0	0.892,0.78	0.146
49121	ENSG00000204410.10	MSH5	chr6	+	31711680	31711802	31710884	31710947	31711966	31712011	49121	30,25,11,33	0,0,0,0	37,35	5,1	221	99	0.000366302	0.0243942	1.0,1.0,1.0,1.0	0.768,0.94	0.146
74541	ENSG00000171634.12	BPTF	chr17	+	65882243	65882432	65871671	65871860	65887959	65888078	74541	134,156,178,259	18,11,14,12	113,131	17,26	288	99	0.000736911	0.0396142	0.719,0.83,0.814,0.881	0.696,0.634	0.146
76337	ENSG00000109323.4	MANBA	chr4	-	103674979	103675152	103647745	103647840	103681874	103682140	76337	4,5,13,28	18,15,14,17	6,5	30,38	272	99	0.000359284	0.0239938	0.075,0.108,0.253,0.375	0.068,0.046	0.146
18383	ENSG00000152465.13	NMT2	chr10	-	15182985	15183028	15177272	15177417	15183420	15183556	18383	7,29,17,27	32,45,24,47	5,9	53,30	142	99	0.000769577	0.0407728	0.132,0.31,0.331,0.286	0.062,0.173	0.147
31205	ENSG00000100105.13	PATZ1	chr22	-	31724772	31724845	31721794	31723295	31731677	31731849	31205	52,53,64,130	92,92,73,116	41,26	97,110	172	99	1.64163e-05	0.00253598	0.245,0.249,0.335,0.392	0.196,0.12	0.147
58885	ENSG00000054965.6	FAM168A	chr11	-	73130918	73131044	73122438	73122581	73141734	73141815	58885	134,116,156,196	3,4,5,7	116,98	16,10	225	99	1.2717e-05	0.00212516	0.952,0.927,0.932,0.925	0.761,0.812	0.147
77885	ENSG00000122741.11	DCAF10	chr9	+	37857237	37857348	37854776	37854979	37860044	37860190	77885	122,112,207,277	9,8,7,17	143,170	22,30	210	99	3.30435e-06	0.000772354	0.865,0.868,0.933,0.885	0.754,0.728	0.147
51655	ENSG00000136717.10	BIN1	chr2	-	127808729	127808819	127808377	127808488	127816586	127816731	51655	125,100,122,195	16,17,7,19	138,123	28,37	189	99	0.000285421	0.0202093	0.804,0.755,0.901,0.843	0.721,0.635	0.148
8061	ENSG00000159202.13	UBE2Z	chr17	+	46990195	46990327	46986077	46986182	46993437	46993549	8061	79,25,76,87	0,0,0,0	57,60	3,6	231	99	1.94435e-06	0.000513165	1.0,1.0,1.0,1.0	0.891,0.811	0.149
60143	ENSG00000235954.2	TTC28-AS1	chr22	+	28315710	28315954	28315471	28315533	28318005	28318251	60143	33,14,70,109	31,24,101,70	14,12	58,51	343	99	3.18601e-08	1.80854e-05	0.235,0.144,0.167,0.31	0.065,0.064	0.15
15737	ENSG00000213699.4	SLC35F6	chr2	+	26998331	26998544	26987157	26987294	27000909	27001087	15737	54,48,73,60	0,0,0,0	49,87	4,3	312	99	7.43267e-05	0.00765577	1.0,1.0,1.0,1.0	0.795,0.902	0.151
24314	ENSG00000198597.4	ZNF536	chr19	+	30774978	30775048	30719196	30719580	30934467	30936639	24314	67,61,41,40	1,0,0,0	40,52	5,5	169	99	1.11287e-06	0.000333041	0.975,1.0,1.0,1.0	0.824,0.859	0.152
28931	ENSG00000074582.8	BCS1L	chr2	+	219524759	219524968	219524457	219524466	219525661	219526030	28931	172,178,189,241	62,58,92,78	85,119	76,67	308	99	0.000371998	0.0246587	0.471,0.497,0.398,0.498	0.264,0.363	0.153
86297	ENSG00000072864.8	NDE1	chr16	+	15793585	15793711	15788021	15788113	15818047	15818079	86297	21,28,22,20	0,0,0,2	24,34	7,0	225	99	0.000404243	0.0262608	1.0,1.0,1.0,0.815	0.601,1.0	0.153
28930	ENSG00000074582.8	BCS1L	chr2	+	219524759	219524941	219524431	219524466	219525661	219526030	28930	149,155,169,209	62,58,92,78	69,108	76,67	281	99	0.000798436	0.0418062	0.458,0.485,0.393,0.486	0.242,0.362	0.154
44444	ENSG00000169609.9	C15orf40	chr15	-	83660707	83660798	83657192	83657580	83677299	83677427	44444	5,26,8,17	1,1,0,1	20,22	5,3	190	99	0.000320101	0.0219932	0.723,0.931,1.0,0.899	0.676,0.793	0.154
10820	ENSG00000099875.10	MKNK2	chr19	-	2039629	2039855	2037630	2037828	2040132	2040176	10820	309,220,225,354	24,19,33,53	292,348	62,83	325	99	7.95024e-05	0.00808866	0.797,0.779,0.675,0.67	0.589,0.561	0.155
39279	ENSG00000164576.7	SAP30L	chr5	+	153832015	153832059	153830650	153830773	153832961	153833045	39279	27,29,26,39	109,133,49,88	14,4	159,118	143	99	2.58349e-10	2.93304e-07	0.146,0.131,0.269,0.235	0.057,0.023	0.155
45268	ENSG00000187531.9	SIRT7	chr17	-	79875490	79875595	79873486	79873557	79875705	79875843	45268	59,49,39,77	0,0,4,0	37,24	6,2	204	99	8.83239e-05	0.00865381	1.0,1.0,0.826,1.0	0.75,0.853	0.155
74041	ENSG00000129187.10	DCTD	chr4	-	183837033	183837041	183836613	183836728	183837825	183838010	74041	4,5,13,15	13,33,40,48	2,0	19,14	107	99	0.000886335	0.0447383	0.222,0.123,0.231,0.224	0.089,0.0	0.155
49784	ENSG00000213024.6	NUP62	chr19	-	50430950	50431105	50411361	50413141	50432582	50432692	49784	209,235,180,223	124,118,51,94	145,143	117,126	254	99	0.000106566	0.00977183	0.396,0.437,0.579,0.48	0.326,0.307	0.156
76824	ENSG00000055070.12	SZRD1	chr1	+	16717869	16717919	16693577	16693803	16719725	16719977	76824	66,66,103,103	79,89,70,93	54,34	91,87	149	99	0.000272149	0.019642	0.357,0.33,0.494,0.424	0.283,0.206	0.157
80016	ENSG00000160953.10	MUM1	chr19	+	1358586	1358699	1356976	1358463	1360134	1360630	80016	198,166,192,233	57,65,41,85	107,110	55,72	212	99	0.000296337	0.0207389	0.619,0.544,0.686,0.561	0.476,0.416	0.157
7391	ENSG00000183943.5	PRKX	chrX	-	3559892	3560012	3544459	3544555	3573189	3573453	7391	89,89,111,129	0,2,1,2	89,125	13,8	219	99	4.75964e-08	2.50315e-05	1.0,0.953,0.98,0.967	0.756,0.876	0.159
29384	ENSG00000197694.9	SPTAN1	chr9	+	131355261	131355321	131353755	131353904	131356453	131356652	29384	123,164,215,314	161,209,162,219	53,85	131,144	159	99	2.18452e-05	0.00317265	0.322,0.328,0.452,0.472	0.201,0.269	0.159
30161	ENSG00000166889.13	PATL1	chr11	-	59423428	59423518	59422995	59423213	59423971	59424073	30161	11,13,11,9	0,1,0,1	17,10	4,1	189	99	0.000552047	0.0324176	1.0,0.872,1.0,0.825	0.69,0.84	0.159
56080	ENSG00000186376.10	ZNF75D	chrX	-	134426206	134426399	134424934	134425061	134477185	134478012	56080	10,23,16,29	1,0,0,0	19,24	2,2	292	99	0.00059344	0.0342853	0.772,1.0,1.0,1.0	0.763,0.803	0.16
20159	ENSG00000215039.2	CD27-AS1	chr12	-	6559506	6560146	6557805	6557903	6560634	6560678	20159	319,328,640,969	29,24,26,41	346,342	36,46	739	99	0.000267539	0.0193679	0.596,0.647,0.767,0.76	0.563,0.499	0.161
10197	ENSG00000197343.6	ZNF655	chr7	+	99159510	99159596	99158129	99158318	99169310	99169410	10197	14,16,27,44	23,19,34,58	5,10	23,32	185	99	0.000641519	0.0360724	0.246,0.311,0.298,0.289	0.104,0.143	0.162
40877	ENSG00000149150.4	SLC43A1	chr11	-	57265225	57265318	57263503	57263637	57268251	57268328	40877	15,5,41,39	1,1,0,2	22,14	3,4	192	99	0.000799483	0.0418305	0.886,0.721,1.0,0.91	0.791,0.643	0.162
62523	ENSG00000138041.11	SMEK2	chr2	-	55805382	55805478	55804450	55804492	55806814	55806917	62523	238,243,150,162	82,87,24,37	210,214	105,114	195	99	0.000227471	0.017026	0.596,0.586,0.76,0.69	0.504,0.488	0.162
76513	ENSG00000166582.5	CENPV	chr17	-	16252453	16252647	16251929	16251999	16253244	16253270	76513	450,513,426,545	222,232,244,270	294,278	298,311	293	99	1.29177e-11	2.2617e-08	0.406,0.428,0.371,0.405	0.25,0.232	0.162
31537	ENSG00000117859.14	OSBPL9	chr1	+	52221991	52222030	52215816	52215867	52226361	52226436	31537	190,139,149,136	67,71,43,73	151,158	131,118	138	99	3.478e-05	0.00448216	0.67,0.584,0.713,0.572	0.453,0.49	0.163
58958	ENSG00000198453.8	ZNF568	chr19	+	37416101	37416160	37413487	37413748	37427647	37427774	58958	27,18,37,66	0,0,0,2	35,32	3,6	158	99	4.75887e-06	0.00101302	1.0,1.0,1.0,0.954	0.88,0.77	0.163
44822	ENSG00000143442.17	POGZ	chr1	-	151384771	151384872	151381169	151381304	151395872	151395897	44822	26,43,50,73	0,0,0,0	27,37	4,2	200	99	0.000322558	0.0220983	1.0,1.0,1.0,1.0	0.77,0.902	0.164
[truncated: 322 more rows]

## Sheet: SKNAS A3SS
id	geneid	genesymbol	chr	strand	longexonstart_0base	longexonend	shortes	shortee	flankinges	flankingee	v12	ijc_sample_1	sjc_sample_1	ijc_sample_2	sjc_sample_2	incformlen	skipformlen	pvalue	fdr	inclevel1	inclevel2	incleveldifference
[truncated: 261 more rows]

[truncated: 4 more sheets: SKNAS A5SS, SKNAS MXE, SKNAS RI, SKNAS SE]
