# Supplementary material for: Metabolic reprogramming of cancer cells by JMJD6-mediated pre-mRNA splicing associated with therapeutic response to splicing inhibitor
Source: eLife journal article supplement (doi:10.7554/elife.90993), 2023-11-01
Supplement: data1 [file Figure 4-data source.xlsx]

## Sheet: Figure 4B
siCtrl			siJMJD6 (#75)			siJMJD6 (#63)
1	0.472855	0.321047	0.786754	0.054447	0.050923	0.975847	0.058156	0.054885
siCtrl			siJMJD6 (#75)			siJMJD6 (#63)
1	0.528538	0.34578	3.97842	0.624989	0.540137	3.43755	0.168967	0.161051

## Sheet: Figure 4D
Ctrl-Luc	Ctrl-Luc;siJMJD6	GAC-Luc	GAC-Luc;siJMJD6	KGA-L-Luc	KGA-L-Luc; siJMJD6
13.4138	16.5581	15.058	16.6628	44.6078	45.3656
35	13.5909	20.3816	16.5304	28.6304	49.4667
15.65	8.22222	14.775	14.4348	37.5135	41.9674
24.8235	11.7419	41.4762	13.5565	29.027	55.0421
14.1176	17.5333	16.4561	18.9722	45.5111	53.1731
24.7333	22	15.1157	9.90506	46.4792	36.3956
33.7	14.6774	24.16	14.2216	30.8511	75.383
16.5714	19.5417	29.0385	17.087	34.3902	63.4333

## Sheet: Figure 4E
	IgG			anti-JMJD6
GAC	1	0.101928	3	3.11244	0.0713696	3
KGA	1	0.501087	3	3.76187	0.254615	3
18S	1	0.003997	3	0.835308	0.0745237	3
	IgG			anti-JMJD6
GAC	1	0.390106	3	1.3893	0.0713696	3
KGA	1	0.257473	3	1.2263	0.254615	3
18S	1	0.014744	3	1.04475	0.0745237	3

## Sheet: Figure 4F
JMJD6 UKv4_A_23_P311616	GLS UKv4_A_23_P308800	GLS UKv4_A_23_P39766							JMJD6 UKv4_A_23_P311616	GLS UKv4_A_23_P39766	GLS UKv4_A_23_P308800
10.17	11.15	13.13							10.48	12.27	12.27
11.9	12.76	10.94							9.38	12.83	12.33
10.22	11.64	12.3							10.78	12.26	11.45
10.96	10.44	13.31							10.8	12.32	12.08
9.76	10.55	13.54							10.62	13.67	11.51
10.11	11.4	12.72							10.98	12.44	11.95
9.94	10.74	13.74							10.02	12.6	12.24
10.14	12.65	12.32							10.76	12.41	10.03
10.75	11.78	11.83							11.34	12.67	12.35
10.36	11.07	11.94							9.96	13.48	11.62
9.64	11.58	13.22							10.26	12.81	12.24
9.83	11.86	13.49							11.41	12.37	11.75
10.91	12.14	12.23							10.01	13.63	11.97
9.1	11	13.79							11.41	13.62	11.98
10.32	11.79	12.76							6.3	13.07	12.33
9.65	10.33	13.47							9.07	13.84	11.4
9.38	11.48	13.3							10.6	13.64	12.1
9.5	12.81	13.18							10.21	13.31	11.93
8.95	11.14	13.49							9.37	13.02	11.94
10.23	10.44	12.97							11.21	12.84	12.7
9.76	12.18	13.41							10.54	12.12	12.72
9.01	10.35	13							9.46	13.42	12.23
8.9	10.88	12.89							10.67	12.44	12.57
9.07	11.52	12.87							9.11	13.41	11.81
9.6	10.7	13.11							10.3	12.17	12.42
9.51	11.45	13.33							10.86	11.74	12.13
10.55	11.46	12.62							10.84	14.17	14.22
9.33	11.8	13.44							10.12	11.28	12.15
9.5	10.5	13.06							9.91	12.72	11.91
10.76	10.44	13.01							9.76	12.93	12.21
9.44	10.82	13.24							10.6	12.51	12.12
10.94	11.65	12.38							9.48	12.81	11.69
9.17	11.09	13.83							10.3	12.7	12.87
10.25	11.92	13.61							9.85	11.88	12.11
9.99	13	12.03							10.14	12.83	12.6
9.46	10.59	12.98							11.2	13.13	11.93
10.35	12.68	12.43							10.65	12.08	12.45
10.31	10.61	13.9							9.82	13.44	12.09
10.24	11.71	12.98							10.15	13.66	10.93
10.65	11.32	12.92							9.14	13.7	12.11
9.59	11.66	13.14							11.09	11.53	12.84
10.21	11.69	13.51							11.77	11.91	11.9
10.04	11.73	13.76							10.35	11.95	12.54
10.02	10.73	12.9							9.68	13.34	11.01
9.65	10.79	13.55							11.51	13.31	11.87
10.16	11.5	12.77							11.44	11.68	12.05
11.04	11.6	12.99							11.2	12.54	12.25
9.13	10.47	13.63							10.88	11.52	12.36
9.37	11.05	13.09							10.75	12.79	11.94
10.85	11.68	12.18							10.56	13.03	11.06
9.47	11.2	13.16							11.51	12.26	12.37
11.55	9.95	14.68							11.05	12.4	10.99
9.34	11.07	13.55							11.08	11.87	12.9
9.59	11.26	13.1							9.86	12.82	11.21
10.97	11.78	12.08							10.53	12.23	11.83
11.05	11.31	12.76							10.44	12.34	12.35
9.81	11.42	13.27							10.66	12.48	12.55
10.51	11.36	12.61							10.2	11.96	12.56
10.64	11.34	12.31							10.05	13.24	11.46
9.31	9.84	13.82							10.16	12.44	11.34
10.15	11.41	13.22							10.87	11.93	11.96
9.52	11.49	13.66							9.27	12.18	12.18
9.81	11.56	13.52							11.33	13.06	13.1
10.58	11.4	13.82							10.04	13.66	12.05
12.03	12.73	11.83							10.33	12.94	12.13
9.6	12.28	13.54							10.97	12.28	11.8
9.97	10.64	13.81							9.47	14.23	12.61
8.86	10.19	13.88							9.9	13.52	12.55
9.93	11.84	13.07							10.81	11.82	12.21
10.31	10.82	12.93							10.4	12.73	11.7
10.37	10.67	12.46							10.99	11.27	11.83
9.74	12.05	12.55							9.39	12.07	12.11
10.27	11.59	12.63							9.86	13.43	10.43
10.21	11.19	13.03							9.18	13.88	11.77
9.24	10.93	12.77							12.14	11.94	12.83
9.63	10.63	13.57							9.88	12.66	12.15
9.8	12.2	12.76							8.72	14.88	10.52
9.61	11.43	13.29							10.38	12.9	12.09
9.75	11.65	12.05							10.43	12.67	12.63
11.31	13.54	12.64							10.46	12.07	12.64
9.96	13.05	12.71							9.87	12.25	11.61
10.69	10.39	13.57							10.4	13.09	12.38
9.2	10.29	13.4							10.57	12.27	12.2
9.28	11.16	13.61							9.33	13.25	11.43
9.34	12	13.37							9.37	12.85	12.71
9.7	10.77	13.41							8.47	13.71	10.21
8.7	11.48	13.01							10.02	12.2	11.71
9.76	11.2	13.11							10.5	12.56	10.79
10.1	12.24	12.77							9.35	13.21	12.02
9	11.34	13.03							9.46	13.09	12.57
10.31	10.9	13.35							9.02	13.97	10.32
8.3	10.07	13.62							9.33	13.38	12.01
8.74	10.37	13.98							10.33	12.91	11.06
9.23	11.13	13.34							9.65	13.43	11.56
9.29	9.98	13.21							8.85	14.16	10.75
9.46	12.21	13.38							9.66	13.81	11.75
9.96	11.82	13.29							9.65	13.3	11.74
9.99	10.65	13.59							9.64	13.94	12.11
10.25	12	10.88							9.71	13.52	12.45
10.41	10.62	13.41							10.84	12.44	11.75
9.71	11.58	12.43							8.64	12.65	10.44
9.87	11.7	12.8							10.18	13.08	9.57
10.67	11.1	11.8							9.11	13.54	10.99
9.47	10.87	14.07							9.92	13.96	10.99
9.62	11.1	13.34							9.55	12.68	12
9.82	10.82	12.91							9.26	13.76	11.17
9.61	11.16	13.06							4.32	14.24	10.95
10.2	12.68	11.33							10.44	13.03	10.94
10.92	12.64	12.35							9.01	14.71	10.79
9.4	11.81	13.62							10.17	13.22	11.98
10.68	12.8	12.31							10.2	13.47	12.7
9.54	11.13	13.55							10.14	12.93	12.95
9.28	11.05	14.11							13.3	14.11	10.37
10.97	12.73	11.41							9.89	13.7	11.08
10.54	11.5	12.19							9.6	14.48	12.69
9.76	10.3	14.06							9.02	12.79	12.17
9.99	10.33	14.13							10.46	12.38	12.05
9.45	11.14	13.84							8.92	14.6	10.54
10.85	10.35	13.11							9.19	13.69	11.91
8.82	10.96	13.6							9.79	14.12	11.74
9.3	10.89	13.79							9.25	13.99	10.92
10.88	12.51	12.39							9.4	13.97	10.95
10.28	12.04	12.5							11.53	11.53	11.5
10.82	12.55	11.71							9.83	13.97	11.74
9.29	11.09	14.08							10.24	13.53	9.79
9.46	11.38	13.76							10.11	13.28	11.47
9.71	11.53	13.91							9.08	12.22	10.72
9.52	12.1	12.96							9.29	13.84	10.26
10.54	10.12	12.71							10.67	12.76	10.68
10.82	12.69	12.78							10.3	12.89	11.03
10.56	12.03	11.95							10.24	13.04	11.8
11.28	11.89	12.96							9.63	14.46	10.84
11.07	11.26	12.37							9.62	12.69	11.3
10.58	11.02	12.51							8.76	14.11	10.7
9.28	10.37	12.51							9.52	13.66	11.52
9.93	10.26	13.51							9.05	12.51	9.35
10.06	11.07	13.52							9.06	13.53	10.44
11.02	11.17	13.09							8.23	14.5	11.97
10.98	10.96	13.3							10.15	13.73	10.87
10.8	10.7	12.55							9.11	13.54	11.57
10.52	11.5	13.22							9.4	13.22	10.67
10.62	11.2	12.14							9.51	12.78	11.7
9.26	11.39	14.3							9.85	13.94	10.3
11.56	11.47	12.87							10.27	12.88	10.76
12.48	12.68	12.87							9.09	13.96	11
11.04	11.77	11.71							9.03	13.52	11.86
9.27	10.96	14.14							10.33	11.99	11.8
9.5	11.45	13.5							9.96	14.25	12.03
10.3	12.52	12.56							8.84	13	11.66
8.99	11.62	13.98							8.62	14.74	11.1
9.14	12.09	12.65							9.73	13.68	10.98
11.11	10.68	12.52							9.38	13.41	11.91
9.48	10.77	13.82							8.64	14.94	9.51
11.5	11.82	12.14							10.23	14.31	9.34
9.41	11.45	13.95							9	13.48	10.85
9.13	10.89	13.52							9.57	13.71	10.24
10.15	12.79	12.36							9.63	13.23	10.29
9.73	11.49	12.14							9.96	13.41	12.54
8.95	11.8	13.08							9.45	13.24	11.12
9.35	11.2	13.15							8.97	14.61	11.73
8.91	11.24	14.1							9.03	13.66	10.38
10.34	12.42	11.55							9.57	13.72	9.74
10.2	10.18	13.44							10.15	14.01	10.45
9.28	10.73	13.84							9.9	13.59	10.12
10.48	12.13	12.88							10.32	13.2	12.74
9.46	11.69	12.99							8.54	13.05	10.53
10.92	11.47	13.02							8.82	14.23	11.45
9.69	10.93	13.67							8.83	14.85	10.74
9.27	10.31	13.68							9.14	14.43	11.66
10.2	10.17	13.04							9.61	10.13	11.97
10.86	12.43	13.03							9.9	12.9	11.71
8.85	10.25	13.91							10.21	13.7	9.54
9.07	12.03	13.44							8.78	14.49	10.94
10.74	12.12	13.18							9	13.61	10.8
9.72	12.13	13.03							8.75	13.31	10.03
10.17	11.49	12.92							9.21	14.03	11.65
8.57	11.1	14.25							9.62	13.78	11.88
9.88	10.88	13.7							9.04	13.33	11.47
9.57	11.09	13.5							8.34	14.12	11.46
8.78	10.5	13.27							9.47	14.94	10.04
10.88	12.12	12.59							8.81	13.81	11
9.49	11.79	13.06							10.95	13.07	11.28
9.06	10.53	13.6							9.58	13.38	12.05
8.88	11.75	13.12							9.78	14.61	11.07
9.15	10.66	13.1							9.71	13.33	12.47
8.31	10.47	13.27							10.6	12.92	11.39
9.48	11.21	13.89							10.26	14.51	9.78
11.7	11.46	12.92							9.47	13.86	10.77
10.38	11.33	13.1							9.99	13.86	12.26
9.34	10.48	13.89							9.46	14.54	11.39
8.87	9.78	14.21							9.36	14.16	11.73
8.83	11.23	13.5							8.9	14.32	9.81
9.31	11.4	14.2							9.45	14.25	11.32
9.57	10.87	13.69							10.7	13.29	12.76
9.2	11.43	12.96							9.15	13.85	11.7
9.87	11.13	12.36							9.7	12.51	10.89
10.4	11.43	12.39							9.51	14.51	11.44
10.73	11.68	12.66							9.08	13.64	9.97
9.57	11.45	14.08							9.08	14.39	9.9
9.76	11.57	12.89							8.89	14.38	10.77
9.28	11.2	12.96							8.89	14.58	10.59
8.65	10.24	13.75							9.38	12.69	9.72
8.96	10.35	13.76							9.07	13.35	11
9.29	11.44	13.67							9.6	13.88	11.29
11.15	13.09	11.99							8.96	14.07	11.63
8.47	10.95	13.56							9.89	13.12	10.64
8.82	10.96	13.26							9.33	12.45	10.9
10.4	11.71	12.12							9.26	13.18	10.89
9.85	11.53	12.7							10.44	12.97	10.86
10.53	12.48	13.5							9.71	12.86	10.77
10.04	12.3	13.31							10	12.36	11.89
9.87	11.29	13.31							10.08	13.22	11.97
9.41	11.94	13.43							10.77	11.89	11.75
10.07	12.33	13.53							9.62	13.35	11.63
8.46	9.65	14.71							9.74	13.63	12.39
9.32	11.13	13.17							9.63	13.09	12.38
10.66	11.8	13.36							10.24	13.58	11.2
10.16	12.39	12.82							9.83	12.48	12.68
9.99	11.21	13.12							10.63	11.28	12.42
11.06	12.41	11.21							10.45	13.38	11.58
8.92	10.86	13.29							10.32	13.38	11.4
9.19	11.13	13.3							9.28	13.66	10.02
9.58	10.37	13.67							9.64	14.2	9.33
9.43	11.64	13.19							10.67	13.44	12.39
10.1	12.37	13.31							8.8	13.81	10.41
9.92	11.11	12.54							9.92	11.61	10.79
9.34	10.94	13.61							9.98	13.91	11.54
11.36	12.21	12.82							11.67	14.77	10.09
10.95	12.8	11.76							10.92	12.93	11.05
9.64	11.25	13.69							9.75	13.21	10.83
9.72	11.09	12.72							10.58	12.08	10.97
10.1	11.46	14							10.52	13.59	11.18
9.26	11.53	14.06							10.18	13.6	11.31
10.13	11.76	13.26							10.32	12.83	10.56
10.53	11.36	13.16							9.64	12.35	11.69
8.85	10.6	13.59							8.81	13.84	10.37
10.39	11.06	13.49							9.06	13.2	10.58
9.74	11.5	12.51							10.44	13.45	11.02
9.49	10.96	13.08							10.47	11.66	12.52
10.55	12.48	11.9							9.57	13.5	12.49
11.39	11.76	13.21							10.06	12.64	11.23
9.65	10.47	13.69							9.3	13.2	10.78
8.9	10.45	13.1							9.86	13.13	12.23
8.98	9.73	14.54							9.66	13.76	11.61
9.83	11.31	13.02							9.65	13.28	12.91
9.8	10.67	14.13							9.05	12.99	11
10.19	10.44	12.73							10.76	11.87	10.82
10.11	11.03	13.18							9.1	13.59	11.26
9.3	11.42	13.2							10.87	11.94	11.89
9.67	11.24	13.02							9.86	13.24	11.25
10.65	12.69	13.42							10.49	12.04	11.19
9.14	10.86	13.52							10.45	12.71	12.19
9.15	11.23	13.1							9.32	13.52	11.71
9.3	11.46	13.32							9.96	12.9	10.9
10.32	11.46	13.28							10.26	12.54	11.98
8.99	10.26	13.6							11.07	12.77	11.36
10.45	10.85	11.97							10.62	13.15	11.37
10.8	10.92	12.83							4.42	12.37	11.83
10.14	12.13	13.4							8.73	14.13	11.17
9.42	11.41	13.57							10.22	13.8	12.79
8.74	10.82	13.42							10	13.14	10.22
10.47	10.92	13.01							9.93	13.7	11.62
8.78	10.8	13.42							10.38	12.36	11.85
10.93	12.42	10.57							9.04	14.1	10.2
8.95	10.77	13.24							9.36	14.35	11.05
9.78	10.66	11.5							10.48	14.35	10.5
9.37	11.17	13.14							8.58	14.21	9.78
8.69	11.09	13.7							8.67	14.22	11.13
8.89	10.52	12.83							10.23	12.93	11.73
9.88	10.57	13.35							10.58	12.44	11.54
9.53	11.29	12.99							8.68	13.48	9.59
9.63	10.61	13.79							9.35	13.06	11.55
10.39	11.73	12.43							8.69	14.69	12.67
9.47	11	13.13							9.67	13.08	11.41
9.7	10.99	13.91							11.18	11.32	12.52
9.58	10.42	12.99							10.27	13.68	11.74
9.91	10.7	12.57							10.24	14.17	10.97
9.83	10.63	13.59							10.73	13.07	10.77
9.89	11.59	12.09							11.37	13.29	12.07
10.71	10.76	13.16							8.82	14.82	10.44
11.26	12.1	12.35							9.08	13.54	11.41
9.2	10.93	13.88							9.96	13.78	11.81
10.25	11.98	12.8							7.95	12.94	10.79
11.66	11.66	12.07							10.52	12.54	11.85
8.21	11.02	13.51							9.14	12.99	10.05
8.53	12.57	14.6							10.44	12.88	13.23
9.43	12.38	13.41							9.69	13.56	11.85
9.51	10.7	13.59							10.24	13.4	12.47
9.07	10.13	13.36							9.96	13.26	11.06
8.98	10.12	13.41							9.49	13.47	12.11
10.12	11.26	13.34							9.51	13.29	10.57
9.6	11.51	13.04							9.13	13.51	10.25
9.12	10.34	13.6							9.62	13.91	10.9
10.14	11.62	13.58							9.17	13.95	10.27
9.37	12.07	12.93							10.75	14.09	10.36
9.12	11.83	13.26							9.27	13.04	11.03
9.3	10.94	12.71							9.43	13.93	10.85
10.43	10.94	12.93							9.44	13.63	11
9.17	11.25	12.97							10.68	13.22	11.65
9.81	10.84	13.08							9.92	14.35	11.1
10.61	11.1	13.86							9.97	13.12	11.42
10.55	11.53	13.12							9.17	13.93	10.15
10.65	10.9	13.99							9.83	13.92	10.28
10.13	11.86	12.65							9.45	13.26	10.03
8.79	11.54	13.05							9.96	13.68	10.76
9.58	10.3	13.73							9.44	13.21	11.46
11.4	12.26	12.16							9.94	13.18	10.96
8.95	10.64	13.73							9.11	13.33	10.9
11.75	11.82	11.97							9.84	13.5	10.89
8.88	10.14	12.98							10.78	14.08	11.02
10.45	11.43	12.33							9.42	13.06	11.32
9.3	9.89	13.17							9.93	12.85	11.11
10.09	10.79	13.49							10.26	13.43	11.37
10.08	11.93	13.52							10.29	13.57	11.82
10.26	10.71	13.47							9.03	13.08	10.27
9.86	10.9	13.66							8.94	13.51	10.92
9.82	10.94	13.16							10.02	12.94	11.33
8.74	10.46	13.84							8.99	12.72	11.71
8.5	10.06	14.13							9.65	13.5	11.56
8.52	9.45	13.39							10.19	13.39	9.9
10.89	11.93	13.01							11.04	12.46	12.74
9.63	9.74	13.13							9.65	13.64	10.56
10.64	11.84	12.29							9.96	13.17	10.53
9.54	12.39	12.12							9.11	13.82	10.76
8.58	10.42	13.75							8.86	13.11	11.6
10.38	11.11	12.48							10.6	13.11	11.04
9.54	11.18	13.83							9.94	13.4	10.21
9.88	11.21	12.84							8.9	13.93	10.58
9.59	11.8	13.5							10.87	13.28	12.22
9.3	10.94	13.69							9.64	13.6	11.57
10.34	12.92	11.06							8.38	13.61	11.14
9.76	10.58	13.27							10.34	13.13	11.3
9.4	11.83	13.86							10.76	12.4	11.95
9.2	10.39	12.97							9.15	14.07	11.73
9.32	10.42	13.37							10.06	13.17	11.96
10.29	11.82	12.24							10.76	12.01	12.08
9.27	10.18	13.2							10.2	13.63	12.43
9.01	10.14	13.86							8.85	13.79	11.21
11.57	12.23	12.15							10.01	12.46	11.25
8.83	11.59	12.61							8.9	13.52	10.95
10.05	9.77	13.3							9.84	14.01	11.11
10.18	11.17	13.83							8.69	12.81	11.33
9.29	10.88	13.54							9.11	13.18	11.91
9.02	10.02	13.84							9.61	13.23	11.13
10.81	11.44	12.78							10.53	12.5	11.55
10.63	11.97	11.9							9.05	12.93	10.64
10.62	10.22	14							10.29	12.46	12.9
9.74	10.23	13.69							9.29	12.75	12.19
9.27	11.7	13.97							9.39	12.87	11.05
9.18	10.64	13.46							9.55	13.53	12.05
9.37	10.45	13.19							9.62	13.98	11.33
9.78	10.98	14.26							9.15	13.7	10.4
9.12	10.02	12.99							9.03	13.22	11.86
9.54	11.73	13.47							9.9	13.36	10.71
8.53	10.38	13.25							8.94	13.36	10.63
9.81	10.08	13.3							8.74	14.34	11.22
9.51	10.43	13.54							8.63	13.65	11.07
9.51	11.49	13.11							9.46	14.29	11.52
9.12	10.91	12.94							10.51	13.19	11.44
9.76	11.39	13							9.01	14	10.38
9.51	11.45	13.4							10.36	13.07	10.57
8.74	9.73	13.56							8.93	13.96	11.01
9.79	10.99	12.75							10.14	13.84	10.16
9.02	10.66	13.23							10.89	12.54	11.57
9.82	10.4	13.07							9.42	14.06	11.81
10.33	12.53	11.96							9.6	13.51	10.89
9.02	9.73	12.99							9.52	11.66	13.16
10.15	11.71	13.47							9.48	13.02	10.68
9.69	10.14	13.83							9.8	13.78	11.98
9.51	10.92	13.16							10.3	12.72	10.84
9.42	10.71	13.35							9.93	14.35	10.98
8.89	11.25	12.93							9.25	13.31	11.66
9.29	11.34	13.11							9.93	12.87	11.82
8.63	10.09	13.83							10.27	13.5	12.23
9.35	9.91	13.6							8.66	14.22	10.19
9.86	11.87	12.67							9.72	13.76	10.5
9.83	10.43	12.62							9.81	13.12	11.36
9.84	11.69	12.1							8.69	13.35	10.51
9.18	10.78	12.35							9.41	13.3	10.31
10.06	10.44	12.4							9.69	12.23	12.49
9.05	11.05	13.41							10.7	13.92	11.52
10.68	12.1	11.71							10.08	12.85	11.97
8.77	11.4	13.46							10.67	12.01	12.58
10.33	11.94	12.28							10.22	13.62	12.04
10.06	12.46	11.85							10.79	13.46	11.91
9.83	11.42	13.23							10.11	13.9	10.77
11.03	10.64	13.2							10.09	12.81	13.14
10.07	11.49	12.12							9.78	13.4	11.47
10.93	10.87	12.3							10.94	12.88	11.55
10.39	10.91	13.25							8.79	13.92	10.22
9.21	10.9	13.8							10.04	12.67	10.83
8.86	12.06	12.69							9.5	13.7	10.05
10.19	11.28	13.28							9.73	13.82	10.43
9.91	11.35	13.14
9.1	11.63	13.18
9.28	12.7	12.89
9.25	10.45	12.88
9.54	11.28	13.48
8.43	11.05	13.56
9.31	12.08	13.36
9.35	10.41	13.03
8.86	10.64	12.68
9.49	10.5	12.71
9.06	9.85	13.06
8.53	11.21	12.71
8.23	10.63	12.9
9.26	11.2	13.28
9.34	11.27	13.5
8.42	10.48	13.4
9.06	10.53	12.86
9.27	11.71	12.81
9.63	10.99	13.4
9.28	10.38	13.57
10.01	12.85	12.83
10.16	10.72	12.62
9.45	10.76	13.41
9.33	10.55	12.92
10.35	12.17	12.16
9.38	10.92	13.77
10.04	9.42	12.98
9.5	11.62	13.2
9.82	10.37	13.51
9.27	10.75	13.48
9.64	10.28	13.57
9.27	11.45	13.62
9.71	12	11.77
9.57	12.34	13.42
9.74	11.47	13.19
9.46	12.26	13.87
8.96	10.87	13.44
9.94	11.86	12.75
9.51	11.64	13.72
9.18	11.9	13.28
9.51	10.52	13.45
9.46	11.73	13.68
10.06	10.98	13.42
9.23	12.23	12.73
9.58	12.04	14.14
8.93	12.16	13.97
7.72	10.21	15.21
9.17	10.47	13.62
9.49	11.47	13.61
9.21	11.51	13.44
9.55	10	13.45
10.76	11.45	12.44
8.74	11.93	13.49
9.78	11.8	13.35
8.77	10.89	13.87
9.09	10.03	13.02
9.89	9.89	12.52
9.98	11.07	13.21
10.1	11.62	12.83
9.82	10.78	12.8
8.96	11.6	13.48
13.2	10.23	14.01
10.53	12.45	12.37
10.31	12.25	12.23
9.17	11.6	13.43
10.86	11.84	12.33
8.79	10.84	13.19
9.29	11	13.06
9.49	11.96	13.24
8.85	10.66	14.62
9.5	12	13.85
8.91	10.64	13.45
9.74	11.14	14.03
10.04	11.87	13.12
9.78	10.86	13.86
8.85	11.23	13.1
10.32	12.08	12.61
9.79	11.71	12.77
9.46	10.53	13.93
10.64	11.63	11.78
9.48	11.52	13.26
11.08	12.14	12.43
10.68	11.98	12.21
9.09	11.54	13.21
9.38	11.99	13.28
9.4	11.89	12.58
9.06	11.02	13.53
10.65	11.33	12.16
9.8	10.86	14.26
9.68	10.41	13.31
9.66	11.54	13.3
9.75	11.21	13.37
10.62	10.95	13.03
10.75	11.53	14.25
10.71	14.13	14.08
10.71	11.63	12.33
9.1	11.05	13.67
9.5	12.04	13.12
9.66	11.87	13.68
9.65	10.22	13.53
9.3	10.67	13.11
8.92	9.79	14.46
11.87	12.05	10.89
10.85	11.35	12.43
11.15	11.69	11.69
9.96	9.8	12.91
10.51	10.9	13.47
11.91	10.35	12.76
10.41	9.97	13.81
10.03	11.47	12.38
10.49	11.14	12.59
11.68	11.6	12.93
10.21	11.3	12.39
10.06	11.64	12.69
9.23	10.45	14.46
9.64	11.05	13.75
11.02	12.12	12.62
8.78	11.38	13.37
11.4	11.77	13.3
10.14	12.57	13.21
11.32	11.76	12.69
10.69	11.03	13.11
9.35	11.04	14.53
8.99	11.17	14.14
10.66	11.48	13.3
8.85	11.62	13.34
10	11.69	14.22
10.29	11.75	12.72
11.07	9.73	10.91
11.79	9.77	10.79
11.42	11.31	12.12
10.92	9.25	11.55
10.29	9.16	11.9
11.2	10.17	11.92
10.3	8.41	11.29
11.57	10.19	10.4
10.26	9.9	11.47
11.33	8.86	10.12
9.64	9.79	10.58
11.08	8.53	11.1
10.28	11.35	12.39
11.44	10.46	11.37
10.48	10.12	12.84
11.3	11.94	11.5
10.67	11.4	12.87
9.62	11.1	13.03
11.07	10.71	12.89
9.26	10.54	13.48
10.56	11.32	12.97
9.54	11.68	13.95
9.87	10.01	14.22
10.69	11.38	12.6
11.41	11.39	12.92
10.49	12.27	12.05
10.17	10.96	12.99
11.02	10.53	12.31
10.82	10.67	12.22
11.4	12.05	13.25
11.56	12.1	13.18
10.95	12.21	12.47
11.35	12.01	12.91
9.96	11.05	13.63
11.41	11.36	12.93
10.79	11.4	12.71
10.76	11.95	12.44
10.77	11.95	12.69
9.33	9.48	14.26
10.97	12.08	10.68
11.42	10.2	12.36
9.97	10.79	13.15
9.78	10.73	13.08
9.54	11.15	13.95
8.88	11.48	13.82
9.29	10.49	14.4
9.34	10.56	13.35
11.09	12.6	12.74
10.6	10.64	12.97
10.95	11.25	12.67
9.26	10.82	13.88
10.12	11.87	12.43
10	11.35	13.93
9.91	11.05	12.09
11.23	12.25	12.57
10.25	10.93	12.59
9.55	12.36	13.09
9.04	11.79	13.59
10.12	12.13	12.71
9.65	11.62	14.03
10.02	11.7	13.19
10.11	10.85	14.08
9.1	10.65	14.05
9.88	12.13	12.5
9.02	10.61	13.86
10.68	11.23	12.04
10.19	12.63	13.11
10.4	10.4	10.97
9.87	12.54	12.07
10.1	11.08	13.48
8.94	10.53	14.24
8.61	10.41	13.73
9.75	10.95	13.6
9.43	11.01	13.68
9.39	9.36	13.13
9.31	9.72	13.44
10.29	10.51	13.72
10.39	11.11	12.5
10.32	10.6	13.88
10.66	10.64	13.87
11.46	10.83	12.87
9.44	10.99	13.31
11.17	11.57	12.83
12.24	11.83	12.1
10.49	11.39	13.58
10.01	10.02	13.75
9.46	11.7	13.71
10.51	12.09	13.18
11.13	8.76	12.36
10.15	10	13.95
9.36	10.26	13.39
10.71	8.65	12.4
10.63	9.89	12.3
10.29	10	13.85
10.12	11.07	12.87
10.01	10.64	13.5
10.49	11.25	13.05
9.45	11.08	13.46
9.27	10.66	13.49
9.14	10.12	13.74
8.66	10.32	13.58
9.28	10.84	14.4
10.66	11.4	13.36
10.33	11.75	13.68
10.87	11.71	11.15
9.18	10.36	13.52
8.44	12.08	12.77
9.2	11.11	13.68
10.95	11.48	12.62
9.69	9.91	11.83
10.62	11.75	10.08
9.13	10.58	13.07
8.63	11.08	13.91
10.02	11.22	12.34
9.13	9.88	13.57
10.14	12.48	13.55
9.69	11.63	13.88
10.29	10.89	12.81
9.96	12.12	13.28
11.3	11.64	12.26
9.48	10.72	14.37
9.48	11.18	12.58
9.38	11.3	12.9
10.47	10.79	13.25
9.6	10.59	12.31
10.73	12.03	11.63
10.17	10.9	12.79
10.11	11.69	12.94
