# Supplementary material for: Metabolic reprogramming of cancer cells by JMJD6-mediated pre-mRNA splicing associated with therapeutic response to splicing inhibitor
Source: eLife journal article supplement (doi:10.7554/elife.90993), 2023-11-01
Supplement: data1 [file Figure 4B-source data.xls]

## Sheet: Results
Block Type	96alum
Chemistry	SYBR_GREEN
Experiment File Name	C:\Applied Biosystems\7500\experiments\Carolyn QPCR\2020-03-16\2020-03-16_BE2C siJMJD6 75 63.eds
Experiment Run End Time	2020-03-16 19:42:31 PM CDT
Instrument Type	sds7500
Passive Reference	ROX
Well	Sample Name	Target Name	Task	Reporter	Quencher	Cт	Cт Mean	Cт SD	Quantity	Quantity Mean	Quantity SD	Automatic Ct Threshold	Ct Threshold	Automatic Baseline	Baseline Start	Baseline End	Tm1	Tm2	Tm3	Comments	HIGHSD	OUTLIERRG	MTP
A1	BE2C siCtrl	GAC-1	UNKNOWN	SYBR	None	24.8544	24.8893	0.0339106				TRUE	0.843213	TRUE	3	17	76.7182				N	N	N
A2	BE2C siCtrl	GAC-1	UNKNOWN	SYBR	None	24.9222	24.8893	0.0339106				TRUE	0.843213	TRUE	3	18	77.0939				N	N	N
A3	BE2C siCtrl	GAC-1	UNKNOWN	SYBR	None	24.8913	24.8893	0.0339106				TRUE	0.843213	TRUE	3	19	77.0939				N	N	N
A4	BE2C siJMJD6 75	GAC-1	UNKNOWN	SYBR	None	26.7871	26.7781	0.0870652				TRUE	0.843213	TRUE	3	20	77.2818				N	N	N
A5	BE2C siJMJD6 75	GAC-1	UNKNOWN	SYBR	None	26.8603	26.7781	0.0870652				TRUE	0.843213	TRUE	3	20	77.2818				N	N	N
A6	BE2C siJMJD6 75	GAC-1	UNKNOWN	SYBR	None	26.6868	26.7781	0.0870652				TRUE	0.843213	TRUE	3	20	77.2818				N	N	N
A7	BE2C siJMJD6 63	GAC-1	UNKNOWN	SYBR	None	25.764	25.7595	0.0545166				TRUE	0.843213	TRUE	3	19	77.2818				N	N	N
A8	BE2C siJMJD6 63	GAC-1	UNKNOWN	SYBR	None	25.7029	25.7595	0.0545166				TRUE	0.843213	TRUE	3	18	77.2818				N	N	N
A9	BE2C siJMJD6 63	GAC-1	UNKNOWN	SYBR	None	25.8117	25.7595	0.0545166				TRUE	0.843213	TRUE	3	18	77.0939				N	N	N
A10																					N	N	N
A11																					N	N	N
A12																					N	N	N
B1	BE2C siCtrl	GAC-2	UNKNOWN	SYBR	None	24.4355	24.482	0.402455				TRUE	0.802251	TRUE	3	17	76.7182				N	N	N
B2	BE2C siCtrl	GAC-2	UNKNOWN	SYBR	None	24.9056	24.482	0.402455				TRUE	0.802251	TRUE	3	18	76.9061				N	N	N
B3	BE2C siCtrl	GAC-2	UNKNOWN	SYBR	None	24.1048	24.482	0.402455				TRUE	0.802251	TRUE	3	17	77.0939				N	N	N
B4	BE2C siJMJD6 75	GAC-2	UNKNOWN	SYBR	None	26.4041	26.36	0.0590292				TRUE	0.802251	TRUE	3	19	77.0939				N	N	N
B5	BE2C siJMJD6 75	GAC-2	UNKNOWN	SYBR	None	26.3828	26.36	0.0590292				TRUE	0.802251	TRUE	3	20	77.0939				N	N	N
B6	BE2C siJMJD6 75	GAC-2	UNKNOWN	SYBR	None	26.2929	26.36	0.0590292				TRUE	0.802251	TRUE	3	20	77.0939				N	N	N
B7	BE2C siJMJD6 63	GAC-2	UNKNOWN	SYBR	None	25.4739	25.5622	0.11984				TRUE	0.802251	TRUE	3	18	77.0939				N	N	N
B8	BE2C siJMJD6 63	GAC-2	UNKNOWN	SYBR	None	25.6986	25.5622	0.11984				TRUE	0.802251	TRUE	3	19	76.1547				N	N	N
B9	BE2C siJMJD6 63	GAC-2	UNKNOWN	SYBR	None	25.514	25.5622	0.11984				TRUE	0.802251	TRUE	3	18	76.9061				N	N	N
B10																					N	N	N
B11																					N	N	N
B12																					N	N	N
C1	BE2C siCtrl	GAC-3	UNKNOWN	SYBR	None	24.54	24.7686	0.198109				TRUE	0.751502	TRUE	3	18	75.2155				N	N	N
C2	BE2C siCtrl	GAC-3	UNKNOWN	SYBR	None	24.8752	24.7686	0.198109				TRUE	0.751502	TRUE	3	18	75.4033				N	N	N
C3	BE2C siCtrl	GAC-3	UNKNOWN	SYBR	None	24.8906	24.7686	0.198109				TRUE	0.751502	TRUE	3	18	74.6519				N	N	N
C4	BE2C siJMJD6 75	GAC-3	UNKNOWN	SYBR	None	30.0679	27.5751	2.15906				TRUE	0.751502	TRUE	3	21	73.7127				Y	Y	N
C5	BE2C siJMJD6 75	GAC-3	UNKNOWN	SYBR	None	26.2971	27.5751	2.15906				TRUE	0.751502	TRUE	3	20	75.5912				Y	N	N
C6	BE2C siJMJD6 75	GAC-3	UNKNOWN	SYBR	None	26.3603	27.5751	2.15906				TRUE	0.751502	TRUE	3	19	75.5912				Y	N	N
C7	BE2C siJMJD6 63	GAC-3	UNKNOWN	SYBR	None	25.2242	25.2589	0.0431888				TRUE	0.751502	TRUE	3	18	75.5912				N	N	N
C8	BE2C siJMJD6 63	GAC-3	UNKNOWN	SYBR	None	25.3073	25.2589	0.0431888				TRUE	0.751502	TRUE	3	19	75.5912				N	N	N
C9	BE2C siJMJD6 63	GAC-3	UNKNOWN	SYBR	None	25.2453	25.2589	0.0431888				TRUE	0.751502	TRUE	3	18	75.4033				N	N	N
C10																					N	N	N
C11																					N	N	N
C12																					N	N	N
D1	BE2C siCtrl	KGA-1	UNKNOWN	SYBR	None	27.7106	28.0479	0.292256				TRUE	0.489109	TRUE	3	22	77.2818				N	N	N
D2	BE2C siCtrl	KGA-1	UNKNOWN	SYBR	None	28.2253	28.0479	0.292256				TRUE	0.489109	TRUE	3	22	77.4696				N	N	N
D3	BE2C siCtrl	KGA-1	UNKNOWN	SYBR	None	28.2078	28.0479	0.292256				TRUE	0.489109	TRUE	3	22	77.4696				N	N	N
D4	BE2C siJMJD6 75	KGA-1	UNKNOWN	SYBR	None	26.7264	26.7338	0.0479995				TRUE	0.489109	TRUE	3	21	77.6575				N	N	N
D5	BE2C siJMJD6 75	KGA-1	UNKNOWN	SYBR	None	26.7851	26.7338	0.0479995				TRUE	0.489109	TRUE	3	21	77.6575				N	N	N
D6	BE2C siJMJD6 75	KGA-1	UNKNOWN	SYBR	None	26.69	26.7338	0.0479995				TRUE	0.489109	TRUE	3	20	77.6575				N	N	N
D7	BE2C siJMJD6 63	KGA-1	UNKNOWN	SYBR	None	26.8833	27.2653	0.570685				TRUE	0.489109	TRUE	3	20	77.6575				Y	N	N
D8	BE2C siJMJD6 63	KGA-1	UNKNOWN	SYBR	None	27.9213	27.2653	0.570685				TRUE	0.489109	TRUE	3	22	73.1492				Y	N	N
D9	BE2C siJMJD6 63	KGA-1	UNKNOWN	SYBR	None	26.9913	27.2653	0.570685				TRUE	0.489109	TRUE	3	21	77.4696				Y	N	N
D10																					N	N	N
D11																					N	N	N
D12																					N	N	N
E1	BE2C siCtrl	KGA-2	UNKNOWN	SYBR	None	29.7062	30.0005	0.322861				TRUE	1.03054	TRUE	3	22	79.9116				N	N	N
E2	BE2C siCtrl	KGA-2	UNKNOWN	SYBR	None	29.9493	30.0005	0.322861				TRUE	1.03054	TRUE	3	23	79.9116				N	N	N
E3	BE2C siCtrl	KGA-2	UNKNOWN	SYBR	None	30.3458	30.0005	0.322861				TRUE	1.03054	TRUE	3	24	80.0994				N	N	N
E4	BE2C siJMJD6 75	KGA-2	UNKNOWN	SYBR	None	28.9098	28.8821	0.0258169				TRUE	1.03054	TRUE	3	21	80.0994				N	N	N
E5	BE2C siJMJD6 75	KGA-2	UNKNOWN	SYBR	None	28.8777	28.8821	0.0258169				TRUE	1.03054	TRUE	3	21	80.2873				N	N	N
E6	BE2C siJMJD6 75	KGA-2	UNKNOWN	SYBR	None	28.8587	28.8821	0.0258169				TRUE	1.03054	TRUE	3	22	80.2873				N	N	N
E7	BE2C siJMJD6 63	KGA-2	UNKNOWN	SYBR	None	28.3672	28.4471	0.0803013				TRUE	1.03054	TRUE	3	21	80.2873				N	N	N
E8	BE2C siJMJD6 63	KGA-2	UNKNOWN	SYBR	None	28.5278	28.4471	0.0803013				TRUE	1.03054	TRUE	3	21	80.0994				N	N	N
E9	BE2C siJMJD6 63	KGA-2	UNKNOWN	SYBR	None	28.4463	28.4471	0.0803013				TRUE	1.03054	TRUE	3	21	79.9116				N	N	N
E10																					N	N	N
E11																					N	N	N
E12																					N	N	N
F1	BE2C siCtrl	KGA-3	UNKNOWN	SYBR	None	28.4161	28.1253	0.252644				TRUE	0.979936	TRUE	3	21	79.3481				N	N	N
F2	BE2C siCtrl	KGA-3	UNKNOWN	SYBR	None	27.9604	28.1253	0.252644				TRUE	0.979936	TRUE	3	21	79.5359				N	N	N
F3	BE2C siCtrl	KGA-3	UNKNOWN	SYBR	None	27.9992	28.1253	0.252644				TRUE	0.979936	TRUE	3	21	79.7238				N	N	N
F4	BE2C siJMJD6 75	KGA-3	UNKNOWN	SYBR	None	27.9134	27.6758	0.206335				TRUE	0.979936	TRUE	3	21	78.7845				N	N	N
F5	BE2C siJMJD6 75	KGA-3	UNKNOWN	SYBR	None	27.5717	27.6758	0.206335				TRUE	0.979936	TRUE	3	20	79.9116				N	N	N
F6	BE2C siJMJD6 75	KGA-3	UNKNOWN	SYBR	None	27.5422	27.6758	0.206335				TRUE	0.979936	TRUE	3	20	79.9116				N	N	N
F7	BE2C siJMJD6 63	KGA-3	UNKNOWN	SYBR	None	27.1501	27.1788	0.0281026				TRUE	0.979936	TRUE	3	20	79.9116				N	N	N
F8	BE2C siJMJD6 63	KGA-3	UNKNOWN	SYBR	None	27.2063	27.1788	0.0281026				TRUE	0.979936	TRUE	3	20	79.7238				N	N	N
F9	BE2C siJMJD6 63	KGA-3	UNKNOWN	SYBR	None	27.1801	27.1788	0.0281026				TRUE	0.979936	TRUE	3	20	79.5359				N	N	N
F10	SIMA siCtrl	JMJD6	UNKNOWN	SYBR	None	28.1586	28.1837	0.0588678				TRUE	0.333792	TRUE	3	22	78.9724				N	N	N
F11	SIMA siCtrl	JMJD6	UNKNOWN	SYBR	None	28.251	28.1837	0.0588678				TRUE	0.333792	TRUE	3	23	77.4696				N	N	N
F12	SIMA siCtrl	JMJD6	UNKNOWN	SYBR	None	28.1416	28.1837	0.0588678				TRUE	0.333792	TRUE	3	22	78.4088				N	N	N
G1	BE2C siCtrl	GAPDH	UNKNOWN	SYBR	None	19.8287	20.046	0.557585				TRUE	0.938764	TRUE	3	13	83.2928				Y	N	N
G2	BE2C siCtrl	GAPDH	UNKNOWN	SYBR	None	19.6297	20.046	0.557585				TRUE	0.938764	TRUE	3	12	84.0442				Y	N	N
G3	BE2C siCtrl	GAPDH	UNKNOWN	SYBR	None	20.6795	20.046	0.557585				TRUE	0.938764	TRUE	3	13	84.0442				Y	N	N
G4	BE2C siJMJD6 75	GAPDH	UNKNOWN	SYBR	None	21.6312	21.5887	0.0417041				TRUE	0.938764	TRUE	3	14	84.232				N	N	N
G5	BE2C siJMJD6 75	GAPDH	UNKNOWN	SYBR	None	21.5869	21.5887	0.0417041				TRUE	0.938764	TRUE	3	15	84.232				N	N	N
G6	BE2C siJMJD6 75	GAPDH	UNKNOWN	SYBR	None	21.5479	21.5887	0.0417041				TRUE	0.938764	TRUE	3	15	84.232				N	N	N
G7	BE2C siJMJD6 63	GAPDH	UNKNOWN	SYBR	None	20.8082	20.8809	0.0632648				TRUE	0.938764	TRUE	3	14	84.232				N	N	N
G8	BE2C siJMJD6 63	GAPDH	UNKNOWN	SYBR	None	20.9232	20.8809	0.0632648				TRUE	0.938764	TRUE	3	14	84.232				N	N	N
G9	BE2C siJMJD6 63	GAPDH	UNKNOWN	SYBR	None	20.9113	20.8809	0.0632648				TRUE	0.938764	TRUE	3	14	84.0442				N	N	N
G10	SIMA siJMJD6 75	JMJD6	UNKNOWN	SYBR	None	28.9391	29.0295	0.0813999				TRUE	0.333792	TRUE	3	23	78.5967	68.453			N	N	Y
G11	SIMA siJMJD6 75	JMJD6	UNKNOWN	SYBR	None	29.0522	29.0295	0.0813999				TRUE	0.333792	TRUE	3	23	78.4088	68.6409			N	N	Y
G12	SIMA siJMJD6 75	JMJD6	UNKNOWN	SYBR	None	29.0971	29.0295	0.0813999				TRUE	0.333792	TRUE	3	22	78.221				N	N	N
H1	BE2C siCtrl	JMJD6	UNKNOWN	SYBR	None	27.3428	27.7595	0.361047				TRUE	0.333792	TRUE	3	21	78.0331	68.6409			N	N	Y
H2	BE2C siCtrl	JMJD6	UNKNOWN	SYBR	None	27.9565	27.7595	0.361047				TRUE	0.333792	TRUE	3	23	69.2044	78.221			N	N	Y
H3	BE2C siCtrl	JMJD6	UNKNOWN	SYBR	None	27.9792	27.7595	0.361047				TRUE	0.333792	TRUE	3	22	78.4088	69.2044			N	N	Y
H4	BE2C siJMJD6 75	JMJD6	UNKNOWN	SYBR	None	29.6787	29.6256	0.240734				TRUE	0.333792	TRUE	3	24	69.5801	78.221			N	N	Y
H5	BE2C siJMJD6 75	JMJD6	UNKNOWN	SYBR	None	29.3627	29.6256	0.240734				TRUE	0.333792	TRUE	3	23	69.5801	78.5967			N	N	Y
H6	BE2C siJMJD6 75	JMJD6	UNKNOWN	SYBR	None	29.8353	29.6256	0.240734				TRUE	0.333792	TRUE	3	24	69.3923	78.5967			N	N	Y
H7	BE2C siJMJD6 63	JMJD6	UNKNOWN	SYBR	None	29.4044	29.4613	0.0493905				TRUE	0.333792	TRUE	3	23	69.3923	78.7845			N	N	Y
H8	BE2C siJMJD6 63	JMJD6	UNKNOWN	SYBR	None	29.493	29.4613	0.0493905				TRUE	0.333792	TRUE	3	24	69.3923	78.5967			N	N	Y
H9	BE2C siJMJD6 63	JMJD6	UNKNOWN	SYBR	None	29.4864	29.4613	0.0493905				TRUE	0.333792	TRUE	3	24	78.4088	69.0166			N	N	Y
H10	SIMA siJMJD6 63	JMJD6	UNKNOWN	SYBR	None	29.8185	29.9423	0.180317				TRUE	0.333792	TRUE	3	24	78.4088				N	N	N
H11	SIMA siJMJD6 63	JMJD6	UNKNOWN	SYBR	None	29.8593	29.9423	0.180317				TRUE	0.333792	TRUE	3	24	78.4088				N	N	N
H12	SIMA siJMJD6 63	JMJD6	UNKNOWN	SYBR	None	30.1492	29.9423	0.180317				TRUE	0.333792	TRUE	3	24	78.0331				N	N	N

## Sheet: JMJD6
Sample Name	Target Name	Cт	Average Cт	STDEV	Sample Name	Target Name	Cт	average Cт	STDEV		ΔCт	STDEV	delta-delta	normalized ratio	Range above	Range below
BE2C +siNC1	JMJD6	27.3428	27.7595	0.361047	BE2C +siNC1	GAPDH	19.8287	20.046	0.557585	BE2C +siNC1	7.71352	0.664271	0	1	0.584768	0.368993
BE2C +siNC1	JMJD6	27.9565			BE2C +siNC1	GAPDH	19.6297
BE2C +siNC1	JMJD6	27.9792			BE2C +siNC1	GAPDH	20.6795
BE2C +siJMJD6 #75	JMJD6	29.6787	29.6256	0.240734	BE2C +siJMJD6 #75	GAPDH	21.6312	21.5887	0.0417041	BE2C +siJMJD6 #75	8.03688	0.244319	-0.323359	0.799207	0.147481	0.124505
BE2C +siJMJD6 #75	JMJD6	29.3627			BE2C +siJMJD6 #75	GAPDH	21.5869
BE2C +siJMJD6 #75	JMJD6	29.8353			BE2C +siJMJD6 #75	GAPDH	21.5479
BE2C +siJMJD6 #63	JMJD6	29.4044	29.4613	0.0493905	BE2C +siJMJD6 #63	GAPDH	20.8082	20.8809	0.0632648	BE2C +siJMJD6 #63	8.58036	0.0802612	-0.866832	0.54835	0.0313708	0.0296732
BE2C +siJMJD6 #63	JMJD6	29.493			BE2C +siJMJD6 #63	GAPDH	20.9232
BE2C +siJMJD6 #63	JMJD6	29.4864			BE2C +siJMJD6 #63	GAPDH	20.9113
														0.673778

## Sheet: GAC
Sample Name	Target Name	Cт	Average Cт	STDEV	Sample Name	Target Name	Cт	average Cт	STDEV		ΔCт	STDEV	delta-delta	normalized ratio	Range above	Range below
BE2C +siNC1	GAC-1	24.8544	24.8893	0.0339106	BE2C +siNC1	GAPDH	19.8287	20.046	0.557585	BE2C +siNC1	4.84336	0.558616	0	1	0.472855	0.321047
BE2C +siNC1	GAC-1	24.9222			BE2C +siNC1	GAPDH	19.6297
BE2C +siNC1	GAC-1	24.8913			BE2C +siNC1	GAPDH	20.6795
BE2C +siJMJD6 #75	GAC-1	26.7871	26.7781	0.0870652	BE2C +siJMJD6 #75	GAPDH	21.6312	21.5887	0.0417041	BE2C +siJMJD6 #75	5.18937	0.0965379	-0.346016	0.786754	0.054447	0.0509229
BE2C +siJMJD6 #75	GAC-1	26.8603			BE2C +siJMJD6 #75	GAPDH	21.5869
BE2C +siJMJD6 #75	GAC-1	26.6868			BE2C +siJMJD6 #75	GAPDH	21.5479
BE2C +siJMJD6 #63	GAC-1	25.764	25.7595	0.0545166	BE2C +siJMJD6 #63	GAPDH	20.8082	20.8809	0.0632648	BE2C +siJMJD6 #63	4.87863	0.0835134	-0.0352726	0.975847	0.058156	0.0548851
BE2C +siJMJD6 #63	GAC-1	25.7029			BE2C +siJMJD6 #63	GAPDH	20.9232
BE2C +siJMJD6 #63	GAC-1	25.8117			BE2C +siJMJD6 #63	GAPDH	20.9113
BE2C +siNC1	GAC-2	24.4355	24.482	0.402455	BE2C +siNC1	GAPDH	19.8287	20.046	0.557585	BE2C +siNC1	4.436	0.687656	0	1	0.610665	0.379138
BE2C +siNC1	GAC-2	24.9056			BE2C +siNC1	GAPDH	19.6297
BE2C +siNC1	GAC-2	24.1048			BE2C +siNC1	GAPDH	20.6795
BE2C +siJMJD6 #75	GAC-2	26.4041	26.36	0.0590292	BE2C +siJMJD6 #75	GAPDH	21.6312	21.5887	0.0417041	BE2C +siJMJD6 #75	4.77128	0.072275	-0.335287	0.792626	0.0407199	0.0387302
BE2C +siJMJD6 #75	GAC-2	26.3828			BE2C +siJMJD6 #75	GAPDH	21.5869
BE2C +siJMJD6 #75	GAC-2	26.2929			BE2C +siJMJD6 #75	GAPDH	21.5479
BE2C +siJMJD6 #63	GAC-2	25.4739	25.5622	0.11984	BE2C +siJMJD6 #63	GAPDH	20.8082	20.8809	0.0632648	BE2C +siJMJD6 #63	4.68126	0.135514	-0.245265	0.843661	0.0830872	0.0756381
BE2C +siJMJD6 #63	GAC-2	25.6986			BE2C +siJMJD6 #63	GAPDH	20.9232
BE2C +siJMJD6 #63	GAC-2	25.514			BE2C +siJMJD6 #63	GAPDH	20.9113
BE2C +siNC1	GAC-3	24.54	24.7686	0.198109	BE2C +siNC1	GAPDH	19.8287	20.046	0.557585	BE2C +siNC1	4.72267	0.591734	0	1	0.507057	0.336455
BE2C +siNC1	GAC-3	24.8752			BE2C +siNC1	GAPDH	19.6297
BE2C +siNC1	GAC-3	24.8906			BE2C +siNC1	GAPDH	20.6795
BE2C +siJMJD6 #75	GAC-3	30.0679	27.5751	2.15906	BE2C +siJMJD6 #75	GAPDH	21.6312	21.5887	0.0417041	BE2C +siJMJD6 #75	5.98645	2.15946	-1.26379	0.41645	1.44403	0.323231
BE2C +siJMJD6 #75	GAC-3	26.2971			BE2C +siJMJD6 #75	GAPDH	21.5869
BE2C +siJMJD6 #75	GAC-3	26.3603			BE2C +siJMJD6 #75	GAPDH	21.5479
BE2C +siJMJD6 #63	GAC-3	25.2242	25.2589	0.0431888	BE2C +siJMJD6 #63	GAPDH	20.8082	20.8809	0.0632648	BE2C +siJMJD6 #63	4.37803	0.0766009	0.344641	1.26983	0.0692448	0.0656641
BE2C +siJMJD6 #63	GAC-3	25.3073			BE2C +siJMJD6 #63	GAPDH	20.9232
BE2C +siJMJD6 #63	GAC-3	25.2453			BE2C +siJMJD6 #63	GAPDH	20.9113

## Sheet: KGA
Sample Name	Target Name	Cт	Average Cт	STDEV	Sample Name	Target Name	Cт	average Cт	STDEV		ΔCт	STDEV	delta-delta	normalized ratio	Range above	Range below
BE2C +siNC1	KGA-1	27.7106	28.0479	0.292256	BE2C +siNC1	GAPDH	19.8287	20.046	0.557585	BE2C +siNC1	8.00194	0.629536	0	1	0.547067	0.353616
BE2C +siNC1	KGA-1	28.2253			BE2C +siNC1	GAPDH	19.6297
BE2C +siNC1	KGA-1	28.2078			BE2C +siNC1	GAPDH	20.6795
BE2C +siJMJD6 #75	KGA-1	26.7264	26.7338	0.0479995	BE2C +siJMJD6 #75	GAPDH	21.6312	21.5887	0.0417041	BE2C +siJMJD6 #75	5.14514	0.063586	2.85681	7.24411	0.326421	0.312346
BE2C +siJMJD6 #75	KGA-1	26.7851			BE2C +siJMJD6 #75	GAPDH	21.5869
BE2C +siJMJD6 #75	KGA-1	26.69			BE2C +siJMJD6 #75	GAPDH	21.5479
BE2C +siJMJD6 #63	KGA-1	26.8833	27.2653	0.570685	BE2C +siJMJD6 #63	GAPDH	20.8082	20.8809	0.0632648	BE2C +siJMJD6 #63	6.38443	0.574181	1.61751	3.06845	1.49996	1.00747
BE2C +siJMJD6 #63	KGA-1	27.9213			BE2C +siJMJD6 #63	GAPDH	20.9232
BE2C +siJMJD6 #63	KGA-1	26.9913			BE2C +siJMJD6 #63	GAPDH	20.9113
BE2C +siNC1	KGA-2	29.7062	30.0005	0.322861	BE2C +siNC1	GAPDH	19.8287	20.046	0.557585	BE2C +siNC1	9.95449	0.644314	0	1	0.562996	0.360203
BE2C +siNC1	KGA-2	29.9493			BE2C +siNC1	GAPDH	19.6297
BE2C +siNC1	KGA-2	30.3458			BE2C +siNC1	GAPDH	20.6795
BE2C +siJMJD6 #75	KGA-2	28.9098	28.8821	0.0258169	BE2C +siJMJD6 #75	GAPDH	21.6312	21.5887	0.0417041	BE2C +siJMJD6 #75	7.2934	0.0490484	2.6611	6.32513	0.218737	0.211426
BE2C +siJMJD6 #75	KGA-2	28.8777			BE2C +siJMJD6 #75	GAPDH	21.5869
BE2C +siJMJD6 #75	KGA-2	28.8587			BE2C +siJMJD6 #75	GAPDH	21.5479
BE2C +siJMJD6 #63	KGA-2	28.3672	28.4471	0.0803013	BE2C +siJMJD6 #63	GAPDH	20.8082	20.8809	0.0632648	BE2C +siJMJD6 #63	7.56619	0.102229	2.3883	5.23539	0.384437	0.358139
BE2C +siJMJD6 #63	KGA-2	28.5278			BE2C +siJMJD6 #63	GAPDH	20.9232
BE2C +siJMJD6 #63	KGA-2	28.4463			BE2C +siJMJD6 #63	GAPDH	20.9113
BE2C +siNC1	KGA-3	28.4161	28.1253	0.252644	BE2C +siNC1	GAPDH	19.8287	20.046	0.557585	BE2C +siNC1	8.07929	0.612152	0	1	0.528538	0.34578
BE2C +siNC1	KGA-3	27.9604			BE2C +siNC1	GAPDH	19.6297
BE2C +siNC1	KGA-3	27.9992			BE2C +siNC1	GAPDH	20.6795
BE2C +siJMJD6 #75	KGA-3	27.9134	27.6758	0.206335	BE2C +siJMJD6 #75	GAPDH	21.6312	21.5887	0.0417041	BE2C +siJMJD6 #75	6.08709	0.210507	1.9922	3.97842	0.624989	0.540137
BE2C +siJMJD6 #75	KGA-3	27.5717			BE2C +siJMJD6 #75	GAPDH	21.5869
BE2C +siJMJD6 #75	KGA-3	27.5422			BE2C +siJMJD6 #75	GAPDH	21.5479
BE2C +siJMJD6 #63	KGA-3	27.1501	27.1788	0.0281026	BE2C +siJMJD6 #63	GAPDH	20.8082	20.8809	0.0632648	BE2C +siJMJD6 #63	6.29791	0.0692256	1.78138	3.43755	0.168967	0.161051
BE2C +siJMJD6 #63	KGA-3	27.2063			BE2C +siJMJD6 #63	GAPDH	20.9232
BE2C +siJMJD6 #63	KGA-3	27.1801			BE2C +siJMJD6 #63	GAPDH	20.9113
