# Supplementary material for: Metabolic reprogramming of cancer cells by JMJD6-mediated pre-mRNA splicing associated with therapeutic response to splicing inhibitor
Source: eLife journal article supplement (doi:10.7554/elife.90993), 2023-11-01
Supplement: data1 [file Figure 5-data source.xlsx]

## Sheet: Figure 5B
Control	KGA	GAC
4.16	12.98	12.48
3.89	13.63	10.93
4.8	13.97	12.95

## Sheet: Figure 5D
Control	KGA	GAC
13.74	22.29	37.55
14.42	22.4	39.17
16.07	23.74	33.93

## Sheet: Figure 5E
pathway	enrichment	pvalue	count	class
ECM-receptor interaction	0	5.03179e-09	0	up
PI3K-Akt signaling pathway	0	3.13913e-07	0	up
MAPK signaling pathway	0	9.5828e-06	0	up
TGF-beta signaling pathway	0	1.32061e-05	0	up
Transcriptional misregulation in cancer	0	1.57974e-05	0	up
Cell adhesion molecules	0	5.36556e-05	0	up
AGE-RAGE signaling pathway in diabetic complications	0	0.000113493	0	up
Protein digestion and absorption	0	0.000153805	0	up
Focal adhesion	0	0.000275813	0	up
Colorectal cancer	0	0.000432637	0	up
Calcium signaling pathway	0	3.18947e-06	0	down
Herpes simplex virus 1 infection	0	0.00130352	0	down
Nicotine addiction	0	0.00213435	0	down
Neuroactive ligand-receptor interaction	0	0.00247577	0	down
Taste transduction	0	0.014359	0	down
Toxoplasmosis	0	0.0149256	0	down
Cardiac muscle contraction	0	0.015133	0	down
Mannose type O-glycan biosynthesis	0	0.0152095	0	down
cGMP-PKG signaling pathway	0	0.0153791	0	down
Choline metabolism in cancer	0	0.0256247	0	down

## Sheet: Figure 5F
pathway	enrichment	pvalue	count	class
Pathways in cancer	0	1.11615e-06	0	up
Complement and coagulation cascades	0	0.000622944	0	up
AGE-RAGE signaling pathway in diabetic complications	0	0.000716977	0	up
Transcriptional misregulation in cancer	0	0.000834951	0	up
Axon guidance	0	0.00119763	0	up
PI3K-Akt signaling pathway	0	0.00129174	0	up
Calcium signaling pathway	0	0.00189081	0	up
Inflammatory mediator regulation of TRP channels	0	0.00203646	0	up
MAPK signaling pathway	0	0.00206704	0	up
Melanoma	0	0.00243058	0	up
Steroid biosynthesis	0	5.52313e-06	0	down
Terpenoid backbone biosynthesis	0	1.02051e-05	0	down
Phosphonate and phosphinate metabolism	0	0.00815271	0	down
Glycosaminoglycan biosynthesis	0	0.00883528	0	down
Hematopoietic cell lineage	0	0.0100449	0	down
Insulin resistance	0	0.0156768	0	down
HIF-1 signaling pathway	0	0.0164173	0	down
Morphine addiction	0	0.0226946	0	down
Synthesis and degradation of ketone bodies	0	0.0229464	0	down
Other types of O-glycan biosynthesis	0	0.0262886	0	down

## Sheet: Figure 5I
siControl			siGLS			siGAC			siKGA
100	100		57.3533	37.9364		86.1963	61.2249		60.3469	52.8574
