# Supplementary material for: Metabolic reprogramming of cancer cells by JMJD6-mediated pre-mRNA splicing associated with therapeutic response to splicing inhibitor
Source: eLife journal article supplement (doi:10.7554/elife.90993), 2023-11-01
Supplement: data1 [file Figure 5-supplement 1-data source.xlsx]

## Sheet: figure 5-supplement 1A
Names	total	elements
BE2C-GAC-UP BE2C-KGA-UP SKNAS-GAC-UP SKNAS-KGA-UP	113	CD44
		PELI2
		DYSF
		ST8SIA4
		DUSP5
		LTBP1
		GPRC5C
		PBX1
		RBPMS
		ACAD11
		OLFML2A
		HID1
		IER3
		IL17D
		YPEL5
		GSDME
		ANTXR1
		IL21R
		TMEM229A
		RUNX1T1
		KCNAB1
		MAST4
		NATD1
		NR4A3
		BCL11B
		ART4
		MMP1
		PDE7B
		DOCK6
		CGNL1
		GAREM1
		INSM1
		GDNF
		CBX4
		PNMA2
		SERTAD4
		PLAT
		ERFE
		GIMAP4
		TAL1
		VIP
		NPR 1.00
		PMAIP1
		RASGRP3
		INHBE
		TP53I11
		TFPI
		FILIP1L
		MYZAP
		GLS
		FFAR2
		TM4SF1
		OSBP2
		CCN1
		LURAP1L
		CDKN1A
		AJUBA
		ARHGAP36
		UBALD2
		VGF
		TGFB1I1
		ANO3
		PLVAP
		POU3F3
		MAFF
		SYT4
		YPEL2
		MFSD6
		ACVRL1
		ATF3
		APCDD1L
		FBLIM1
		DDAH1
		COLGALT2
		EGR1
		EGFL7
		RAMP1
		SH3KBP1
		SMOX
		DRD2
		PDGFB
		MYCT1
		GBP2
		JCAD
		FBN1
		DHRS3
		CPED1
		CHAC1
		DYRK1B
		COL3A1
		FUT1
		PECAM1
		DDIT4
		INHBA
		SLC1A4
		KCNQ2
		FGF2
		CALCRL
		DGAT2
		CLVS1
		SERPINE1
		ITGA11
		WWTR1
		MEST
		LAPTM5
		DAP
		SLC6A9
		STC2
		ANKRD1
		PMEPA1
		KCNN4
		ITPRIP
		PGPEP1
BE2C-GAC-UP BE2C-KGA-UP SKNAS-GAC-UP	53	KCNMA1
		GRAP2
		STARD13
		VASH1
		TLE2
		AC012184.2
		BMP6
		PDGFD
		RAB15
		NPY
		TAL2
		TNFRSF19
		ITGB8
		Z82206.1
		CDH11
		COCH
		AMOTL2
		MMP11
		LUM
		GOLGA7B
		FCGRT
		IL17RD
		GFOD1
		GPBAR1
		HS6ST1
		TOX2
		FBXL7
		ALDH1A3
		ENTPD1
		PRKCH
		LMCD1
		CHRM3
		ATP8A2
		PROCR
		ITGB5
		PRCP
		FHL3
		SIPA1L2
		BMERB1
		GSN
		PLEKHA7
		SIPA1L1
		ARHGAP23
		PRDM8
		TGFB3
		LRRK1
		ERBB3
		ASIC2
		2024-03-02
		PRSS23
		S100A10
		RGS9
		CDH5
BE2C-GAC-UP BE2C-KGA-UP SKNAS-KGA-UP	153	KCNJ2
		KCNG1
		GDF15
		KIRREL1
		TRIB3
		BBC3
		FFAR3
		ITGA3
		C5AR1
		LRRC8D
		PCK2
		TLCD2
		RHBDF1
		PHLDA1
		TM6SF1
		AKNA
		SPRY2
		CARS
		ECE1
		FBLL1
		TMEM79
		KLF2
		MAP1LC3B
		CRCP
		GRPEL2
		BMP2
		DGKQ
		SLC48A1
		PSMB8
		VEGFA
		SLC7A11
		MYC
		PTGIR
		ULBP1
		PYROXD1
		TMEM268
		PPARD
		PLPP4
		INPP5K
		PPP1R15A
		ASL
		KDM7A
		SH3BP2
		ZFP36L1
		AKAP6
		GBP1
		VSIG10L2
		ROBO4
		THBS1
		CDC42EP5
		FAM184A
		MTHFD1L
		BHLHE40
		CAMTA2
		CKAP2L
		TGIF1
		SPIN3
		CCDC71L
		MXD1
		FGF21
		METTL27
		HLA-C
		JDP2
		CDC42EP1
		COL27A1
		XYLT1
		APC2
		PSPH
		IER2
		ZBED3
		GIMAP8
		NRP1
		PKD1
		APOL6
		BTG1
		HLA-E
		REST
		TTLL1
		B4GALT1
		TSC22D3
		ARHGEF2
		TAP1
		BCL2L2
		CCNG2
		ISL2
		SLC1A5
		TAPBP
		SMAGP
		TOM1L2
		IFITM2
		LTBP2
		PPM1M
		IL13RA2
		TTC25
		ABTB2
		VLDLR
		RHEBL1
		SLC38A2
		ANKRD11
		CTH
		ADAMTSL2
		LRP10
		PIEZO1
		ATF4
		IFRD1
		BMPER
		CCL2
		H1F0
		RAB39B
		JAG2
		UHRF1BP1
		GRB10
		MMP28
		ZNF580
		EIF1B
		HERPUD1
		DUSP6
		DNASE2
		LOXL2
		ADM2
		HIST1H1T
		SLC7A5
		GPR42
		DDIT3
		PSAT1
		CCDC80
		H6PD
		SLC43A1
		ERN 1.00
		MICAL2
		ASNS
		INSYN2B
		EDEM1
		FAM43A
		CAMK1D
		IFI35
		TGFBR2
		MORN4
		2024-09-10
		SLFN5
		ITGB3
		ZNF19
		FOXD1
		ACTA2
		GPT2
		CEBPB
		RBM43
		SESN2
		AARS
		TRIM8
		ANXA11
		GARS
		PSMB9
BE2C-GAC-UP SKNAS-GAC-UP SKNAS-KGA-UP	16	OTUD7A
		REPS2
		FRMD4A
		GAL
		PRAG1
		LIPG
		RNF24
		CRYL1
		MYADM
		NOVA2
		LMF1
		ABCC3
		EXD3
		GMDS
		ARHGAP22
		SCN5A
BE2C-KGA-UP SKNAS-GAC-UP SKNAS-KGA-UP	73	GPR153
		HES1
		SEL1L3
		CHMP1B
		ORAI3
		LRRC2
		BEX2
		MYCL
		HBP1
		FAM49A
		CALCOCO2
		YPEL1
		CDKN2B
		TMEFF2
		KLF9
		NNMT
		ZSWIM4
		COLEC12
		CD109
		CCPG1
		GCOM1
		LINGO2
		MOCOS
		FOXS1
		CLIP4
		PBXIP1
		NBL1
		TFEB
		BMX
		RFFL
		TPST1
		GPR68
		CASP4
		DEPP1
		YPEL3
		RGMB
		TRAF3IP2
		SH3RF3
		FAM129A
		TIMP3
		HRK
		SP6
		DBNDD2
		CFAP61
		FRAT1
		CORO2B
		C15orf62
		FAM169A
		VIM
		GNA15
		TM4SF18
		GABARAPL1
		TNFAIP8L1
		GCHFR
		CAMK2N1
		GREM1
		OSBPL6
		ARNTL
		GFRA3
		SEMA6C
		ARAP2
		CHIC2
		CREBRF
		ETV5
		COL6A3
		PI16
		THSD4
		KCNJ5
		FOXO3
		TFPI2
		CLCF1
		GCNT1
		KLHL24
BE2C-GAC-UP BE2C-KGA-UP	447	EDN1
		TACC2
		IRAK1
		2024-09-03
		PAK1
		NAP1L2
		HS3ST3A1
		MON1B
		ERG
		AATK
		KCNK6
		MAGEA2
		EVC
		S1PR2
		ANXA3
		MT-ATP6
		TEK
		COL1A1
		GDPD5
		PRR16
		PNMA6A
		FITM2
		ABR
		CORO2A
		F8A1
		PPP2R3B
		EIF1
		RNF217
		MARF1
		RBFOX1
		KLRG2
		LRRC4C
		COL18A1
		CDH15
		ADRA2A
		FRA10AC1
		MMP24OS
		RASIP1
		CPEB1
		PSMC3IP
		ZNF467
		CALHM5
		IL6R
		DBH
		SEZ6
		TFAP2B
		PKHD1
		STK40
		ALDH1L2
		AHNAK
		DUSP18
		PLXNB3
		NEK6
		SORCS2
		IDS
		DNAJC30
		IFI16
		CDHR1
		MICALL1
		CSTA
		CAPN6
		LCN1
		BRD4
		SOX9
		CRABP1
		FTH1
		CTSB
		POC1A
		COL23A1
		VWCE
		ARHGEF26
		TRIL
		DLGAP1
		UBALD1
		CYB561
		EPHA7
		TNFRSF1A
		AC087721.2
		NAV2
		TRIM56
		FAM78A
		NCSTN
		ITGA6
		BEGAIN
		KDM6B
		MGP
		SOST
		CMKLR1
		FLI1
		TYMS
		PPDPF
		IRS2
		MEGF11
		PDE3A
		TRANK1
		FAM89A
		ZBTB7C
		CAVIN2
		VPS53
		ZBED6
		S100A16
		DAG1
		MAVS
		BGN
		GBP4
		CDH20
		CA12
		REEP1
		NRROS
		DISP3
		MMP24
		DTX4
		KCNH1
		NECTIN1
		FLT1
		PKIG
		PCDH12
		NXN
		HTR4
		SIX6
		PALM
		SYNE3
		IRX6
		HHEX
		TCEAL2
		ESAM
		HS3ST3B1
		FAM102A
		CCDC3
		C17orf49
		ATP9A
		PDLIM1
		CALCB
		MMP14
		IQCE
		GALNT6
		ADAMTS15
		PACS1
		ARL4D
		GPR161
		CHD2
		SIRPA
		RNF152
		RGS11
		HOXC10
		IPCEF1
		PLSCR1
		SCARA3
		NRGN
		C11orf80
		ELMO1
		ZNF423
		MBTPS2
		TBX18
		HIST2H2AA3
		HTRA1
		ZNF853
		SUSD4
		PHLDA2
		PDE10A
		PSKH1
		RHOJ
		KIF13A
		SDC3
		MECOM
		E2F2
		TSPAN18
		COL4A1
		SEZ6L
		SYDE1
		GRM7
		SLC1A3
		FNDC10
		SHROOM4
		MAP1LC3A
		MNT
		SH3BGRL3
		PALD1
		PTPRM
		SLC7A1
		HIST1H3D
		RABL2B
		CELSR2
		LCP1
		ADCY4
		DOC2B
		SPRY4
		ELMSAN1
		BOC
		ANO8
		ARHGDIG
		MASP1
		PCDHGC3
		LMF2
		SMIM32
		UPF3B
		NHSL2
		ST6GAL1
		SFMBT1
		IGFBP3
		TAF15
		SORBS3
		SREBF1
		DLK1
		AL034430.1
		R3HDM1
		SLC30A3
		GDF7
		MAP1LC3B2
		BRD3
		ADAM11
		BACH2
		FLT4
		ATXN2L
		SYT16
		ADARB2
		EPHB4
		PYCARD
		CHST3
		SCARF1
		NRXN2
		NCR3LG1
		MAGEB2
		ZADH2
		MOB3B
		PLXNA3
		KLF3
		NPDC1
		VAMP2
		C17orf97
		RTL8A
		TNIK
		SOX7
		NMB
		CHMP4A
		NID1
		S100P
		MMRN2
		SSH2
		DUSP22
		ZFP3
		AP003071.5
		AIDA
		RTL1
		SLC44A2
		LRRC8C
		DSCAML1
		NFATC1
		MAN2A2
		SMAD3
		SYT2
		RFTN1
		OSTF1
		ALK
		ATP11A
		RNASEK
		TGFBR3L
		SYT5
		BTBD17
		TFCP2L1
		IGSF1
		TTYH3
		RAP1GAP
		C1orf56
		DCLK1
		NEFM
		COMMD7
		PLXNB1
		ZFP69B
		LRRC4
		PRAF2
		ARHGAP33
		CAVIN1
		APLNR
		IRF6
		CACNA1B
		TP53INP2
		CACNG4
		MYBL2
		MAPT
		CTXN1
		MGAT5B
		ABHD15
		TPBGL
		SRR
		SLC32A1
		MT-ATP8
		DKK 1.00
		PITPNA
		CCDC120
		KSR1
		CCN2
		STAC2
		P2RY1
		COL6A2
		TBC1D2B
		SOX12
		GMIP
		ZFPM1
		FGFR2
		LMO2
		ARHGEF3
		B4GALT6
		TTBK1
		DBX1
		MYH10
		ISY1-RAB43
		SPIN4
		KLHL35
		PPP2R2C
		VWF
		LINGO1
		CRIM1
		ATF5
		TIE1
		KCNK1
		AL139300.1
		NFIC
		C7
		GDPD1
		PRR14
		HEG1
		TSPAN5
		ADA
		S100A11
		RPRD2
		PRLHR
		TMEM154
		CASP3
		CREB5
		THSD7B
		LY6G5C
		ZNF213
		CD34
		PLCXD1
		AP5Z1
		ENG
		WBP1L
		ARHGAP31
		DHX32
		TMEM150C
		PLXNA2
		FAM83G
		TRIM67
		PLK2
		NFASC
		BCL2L11
		AFAP1L2
		KLF7
		SERPINE2
		CDH22
		SFT2D3
		DGKI
		GPR27
		NFIX
		NLRC5
		TRIM7
		PIK3CG
		TPP1
		NDST2
		RAB3D
		BRI3
		USP21
		C11orf87
		GRIN1
		FOS
		2024-03-04
		ULBP2
		MAGEA6
		TNFRSF1B
		TGOLN2
		FGD1
		KCNK15
		ANKRD29
		SH2B3
		DNTTIP1
		LYL1
		PTPRA
		ZEB2
		RHBDF2
		WSCD2
		EIF4E3
		RILP
		ARID3B
		AQP1
		TLR4
		MKRN3
		AC129492.4
		PLPPR2
		C2orf70
		PPP1R16B
		CBY1
		RAD51
		REEP4
		KCTD7
		RANGRF
		SOWAHC
		TBC1D25
		ULK2
		RADIL
		CYB561D1
		UPP1
		RGMA
		KRT10
		HS6ST3
		YBX3
		ENC1
		SEMA5A
		CABLES1
		ARPIN
		COL6A1
		F11R
		SV2C
		COL5A1
		FREM1
		PTGS1
		RNF157
		STX16
		PEX5L
		ETV6
		AL162171.1
		RFLNB
		EVA1C
		CRISPLD2
		CSAG3
		KIF3C
		SLC38A7
		HSPG2
		TNR
		NOTCH1
		DAPK1
		OLFML1
		FCHO2
		MROH1
		PITPNB
		TUBB4A
		RNF44
		TTC7B
		ECSCR
		MNX1
		ZNF358
		HLX
		CCDC9
		FLRT1
		ST18
		HAPLN1
		KRT32
BE2C-GAC-UP SKNAS-GAC-UP	11	ATP2B2
		CEP104
		AFAP1
		TENM3
		SBK1
		CDK11B
		ATXN1
		AMIGO1
		IGF2
		SSH1
		ANK1
BE2C-GAC-UP SKNAS-KGA-UP	18	SH3D19
		ADAMTS17
		MEGF6
		EPAS1
		BNC2
		BMP8B
		MEF2D
		EIF4EBP3
		FAM241B
		MED10
		KLF6
		MT-ND4
		C16orf74
		GCC1
		S1PR1
		EPHX1
		GPX3
		HIVEP3
BE2C-KGA-UP SKNAS-GAC-UP	29	IGSF3
		OSBPL10
		PLCXD3
		PTGER4
		CGREF1
		SMKR1
		SMAD1
		GNG11
		PDE4B
		ARG2
		FAM214B
		FZD4
		REEP2
		RYR3
		FGFBP3
		GPR137B
		TMEM45A
		C15orf65
		BATF3
		BMP4
		AKAP4
		ANGPT1
		HHAT
		TMSB15A
		SLC35D3
		LPAR5
		PKD1L1
		TIMP2
		CEMIP2
BE2C-KGA-UP SKNAS-KGA-UP	124	FIBIN
		ITGA5
		MSRB3
		GOT1
		RPS6KA5
		AC004151.1
		FGGY
		PDCD4
		TNFRSF9
		GCC2
		WDFY2
		ASS1
		PEX11G
		RCSD1
		AC138969.1
		TPBG
		IL27RA
		NFE2L2
		LMO4
		ZC3H6
		AC010618.1
		PI15
		IRF7
		NAB2
		LRP1B
		PLA2G4C
		EPS15
		INPP5B
		ZNF524
		CD93
		ARHGAP26
		MEF2B
		ABHD14B
		DUSP10
		CCDC28A
		TK2
		GTPBP2
		KDM4A
		CCDC174
		OGFRL1
		CITED2
		GGACT
		SERPINB8
		PFKFB2
		SH3BP5
		TLR7
		TOM1L1
		NFE2L1
		ARSG
		SLC3A2
		TRIOBP
		HDAC11
		FAXDC2
		PDGFRA
		LINC00634
		DDO
		TXNL4B
		GBP5
		KLHDC9
		CPNE7
		MFSD3
		AFF3
		ESM1
		MBNL2
		SLC22A4
		C6orf223
		ST3GAL1
		NEDD4
		CASP10
		BDKRB2
		PIGV
		ARID5B
		NUPR1
		THSD1
		PTGFR
		ABCC4
		EMP1
		NDUFA4L2
		MTHFD2
		SATB2
		WARS
		SAMD9L
		BEST1
		DDX60
		TWF2
		ADAMTS4
		DRAM1
		PYCR1
		CYB5D2
		LAT2
		AMACR
		LARP6
		TNFRSF12A
		TXNIP
		SKA1
		TUBE1
		GIMAP2
		HSPA13
		OSCAR
		RBCK1
		OPTN
		PXDC1
		LRATD2
		ATP6V1E2
		HPCAL1
		TMEM173
		ZNF674
		CEBPG
		TRIM38
		ISG20
		TRAF1
		XBP1
		IL33
		HLA-B
		PARP3
		FBXO48
		EIF2S2
		TMEM254
		DDR2
		ZXDB
		KRBOX4
		GPAT3
		ARNT2
		FAM161B
SKNAS-GAC-UP SKNAS-KGA-UP	608	RIT2
		APBB2
		AC010422.3
		CUBN
		FAM214A
		NTSR1
		MITF
		C15orf48
		COL4A5
		TMCC3
		RAB40B
		TNS3
		NR4A2
		HOXA13
		CXADR
		SUGCT
		TAOK3
		BMP3
		LIMS2
		PHLDB3
		UTRN
		GLT8D2
		CECR2
		CA11
		NECTIN2
		SCX
		LGI2
		WDR45
		DNAH17
		TAFA2
		HTR7
		DHRS7
		C3
		NRARP
		SLC6A15
		RIN2
		SORT1
		CARMIL1
		NFE4
		TNFRSF10A
		MAFK
		OBP2A
		MPP4
		PPP1R9A
		FAXC
		CLCN4
		EDNRA
		PIK3AP1
		RASSF5
		SLC38A4
		AGT
		HES7
		PDP1
		PLD1
		GCA
		CD99
		EPHA4
		KCNQ5
		PLCXD2
		SLAIN1
		TDRKH
		SPATA4
		PCSK6
		ADRA1A
		PAEP
		STON1
		KRT15
		KRT17
		SORBS2
		C5orf47
		MEGF10
		KLF4
		PRRX1
		2024-03-11
		MMP23B
		ASAP2
		NIPAL4
		PPL
		RRAD
		MAP3K7CL
		FMN1
		CFAP58
		FSTL5
		RNF182
		RASSF4
		SLC35F1
		SYTL4
		FOXL1
		MOSPD1
		CHRNB1
		CAMK2B
		CADPS2
		FRMPD4
		GRHL1
		NEDD4L
		IL1A
		RGS20
		FYN
		PAWR
		ELAVL2
		TNFAIP8L3
		RAB9B
		SNCAIP
		TYRP1
		CD177
		OSBPL3
		GLI1
		WNT5A
		SPAG6
		PTGS2
		ACBD7
		WNT9A
		NT5E
		IGFBP2
		TRPC1
		LGALS12
		NFAT5
		DENND2A
		SDK2
		IL15RA
		FAM53A
		CNTN5
		ADCK2
		LRIG1
		GNG2
		TRHDE
		PCDH11X
		BCL6
		DDIT4L
		LIMS1
		CSRNP1
		DOCK4
		CHST2
		DKK 2.00
		SOX15
		MALL
		IL1RAPL1
		MAGI1
		BTBD8
		ZDBF2
		CBLN2
		PDK4
		SMIM1
		GFRA2
		AMPD3
		FILIP1
		COL8A1
		IGFBP5
		POLD4
		FHOD3
		RPS6KA2
		GADD45B
		KLHDC1
		FER1L6
		PLXNA4
		GRAMD1C
		B3GALT2
		MYO1E
		FAM83A
		ACSS3
		LYPD6B
		GREM2
		CCDC102B
		NPAS2
		MYBL1
		CRADD
		PDZK1IP1
		FIG4
		CNN2
		LMO7
		C1S
		UBASH3B
		BMF
		GRAMD1B
		PCED1B
		SIGLEC15
		TMBIM1
		F2RL2
		LIMS3
		AXL
		KRT80
		ZNF365
		PTGER2
		MAP3K21
		ZNF582
		AGRN
		SLC30A8
		GADD45A
		HIC1
		SCG2
		ITGBL1
		NDST3
		PTPRF
		MYEOV
		THBS4
		MYLK
		NCAM2
		ITPRID2
		NR4A1
		AQP3
		LGALS3
		ZHX2
		CLSTN3
		NFE2L3
		AKAP12
		AC000120.3
		CD163L1
		MGST2
		ZNF880
		ARHGAP29
		EHD4
		KCTD11
		GABRP
		PDE5A
		GOLGA8K
		CBX7
		SPINK4
		HYAL4
		SYTL2
		CAPS2
		GRID2
		PCMTD1
		MAPK13
		RPS6KL1
		SLC43A2
		HRH1
		FUCA1
		KRT18
		ARSD
		FGF5
		NSMCE1
		DNAH10
		GLRX
		VASN
		VSTM2A
		RUNX2
		SRPX
		IL1RN
		FABP6
		SYBU
		HIP1R
		COL4A6
		SCN7A
		GAS1
		ZNF625-ZNF20
		MAFIP
		MB21D2
		DNAH8
		CNTNAP5
		IL4R
		ICA1
		SPAG1
		GDE1
		LOXL4
		UBE2E2
		LRRN4CL
		DKK 3.00
		SPSB1
		EVA1A
		PATJ
		SEMA4F
		TOR4A
		RASSF8
		DMD
		ADM
		HOOK1
		ACP6
		KCNQ3
		ANKRD33B
		TRPV3
		IFIH1
		AC013271.1
		SHTN1
		GPR63
		FOSB
		TUBB8
		MUC13
		BCL6B
		IL1B
		SLC25A45
		CPE
		CDKL5
		AIG1
		AC005324.4
		TESK2
		ST3GAL5
		ITGA7
		JPH1
		EFR3A
		HTR2A
		N4BP2L1
		SEMA6B
		C2orf88
		HSPB7
		SUCNR1
		ABCA5
		KCNJ11
		PPP2R3A
		MYO1D
		PHLDB2
		CYFIP2
		PLAUR
		TMEM56
		ZNF280A
		CALCOCO1
		AMIGO2
		TRIM36
		ABTB1
		EDEM3
		NR1D1
		ENPP3
		PARD6B
		SATB1
		KAT2B
		CYP1B1
		COLQ
		MCTP1
		STEAP1
		IQGAP2
		BAIAP2L1
		ST8SIA5
		KIF26B
		OTUD1
		CCNA1
		PLAU
		EHF
		CD300C
		MSC
		KLF11
		DOCK2
		AL139011.2
		PLAAT4
		LMNTD1
		AC005747.1
		CDK15
		RGS16
		SMIM3
		TGM2
		BASP1
		CLDN11
		MXRA8
		EPHA2
		ZNF277
		SAMD12
		PLN
		UCHL1
		SHISA3
		TTLL6
		EVI5L
		ITGB4
		DCBLD2
		SPATA17
		AMN1
		SNTG1
		SLC16A12
		CACHD1
		HDAC5
		EVC2
		FLT3LG
		CREG2
		KIFAP3
		NUP62CL
		BDNF
		SEMA3A
		FOXC1
		HSPB3
		ABCA1
		ALDH4A1
		TIPARP
		TMEM233
		ELF3
		AGPAT3
		FGD4
		CLDN2
		GSAP
		CFH
		NRP2
		FAM135A
		ARL4C
		SGIP1
		PRRG4
		AQP4
		BBS10
		JAG1
		CHGA
		SERPINB7
		CCL7
		MYO10
		TRIM55
		PLXNC1
		SNX10
		C1orf21
		DLG3
		SSR3
		ELOVL7
		PIM1
		ARNTL2
		CD180
		WT1
		SERPINB2
		TRPV2
		SLC9A7
		TUFT1
		CTSS
		TLL2
		STOM
		CLDN23
		EDN3
		ANK2
		NALCN
		PLA2G4A
		ZNF516
		TMEM35A
		EDNRB
		2024-03-03
		KYNU
		LIN7A
		ROBO1
		STX11
		BEND7
		GPR176
		EGFLAM
		KBTBD11
		CFAP299
		PAK3
		DGKB
		AGPAT4
		FRAT2
		UACA
		EBF1
		SLC30A4
		LRRC15
		SFRP4
		GABRA2
		MAN2A1
		TNFSF18
		KLHL4
		CLMN
		IQCD
		PNRC1
		TRIB1
		LCA5
		VMAC
		USP53
		ICOSLG
		ANG
		RCAN3
		PRSS3
		S100A6
		UBD
		TES
		LHPP
		C8orf34
		SLC35F3
		CCDC30
		BEX4
		ZG16B
		CHODL
		IL12A
		ZNF521
		FOXA3
		POLB
		LIMS4
		MVP
		MTX3
		FP565260.3
		NUP210
		VDR
		CLDN12
		EML2
		STX3
		ZNF610
		ABCG2
		MOXD1
		MFAP4
		AC118754.1
		TMEM45B
		EDIL3
		TMEM158
		PDE2A
		LAYN
		TMEM65
		CYP4X1
		FAP
		GPR37
		ARHGAP9
		LONRF3
		INPP4B
		GPR183
		SNPH
		SLC2A12
		PCGF5
		RASGRP1
		SORBS1
		KREMEN1
		TBC1D30
		DENND1B
		MXI1
		EVA1B
		JMY
		KDM4C
		ARRDC3
		SDK1
		CACNA1A
		TCAF2
		WIPI1
		TMCO4
		RNF144B
		EPHA6
		CNTNAP3
		SLC20A1
		SPTB
		SIX4
		RNASEL
		ZDHHC23
		JAM2
		ZNF256
		FOXF1
		WNT2B
		CTBS
		PDZRN4
		CNTNAP2
		SDHAF4
		NEUROG2
		H1FX
		NIPAL3
		HYKK
		RIPOR3
		FLRT2
		NPPC
		CEBPA
		SERTM1
		PAIP2B
		XG
		TMEM163
		SOCS2
		VCAM1
		INSR
		PEX10
		GLIPR1
		GLRB
		HHIP
		TLE6
		MTSS1
		ARHGAP6
		KIAA0319
		ME3
		SMPDL3B
		FAM221A
		JAK1
		PPP1R1C
		QSOX1
		CASC1
		FRZB
		FOXP1
		EPHB6
		VEGFD
		CDCP1
		CITED4
		TCP11L2
		RRAGD
		F2RL3
		GPRC5B
		TDO2
		GKAP1
		VIPR1
		LAMA4
		MIEF2
		MEIOC
		CLIC2
		TRIM59
		APLF
		NPR 2.00
		PARD3B
		CDKN2A
		ADGRV1
		RASGRF2
		XIRP2
		POPDC3
		SLC14A1
		NPL
		FBXO32
		ESPN
		SULT1B1
		GAD1
		FJX1
		CYP2J2
		SCG5
		FGD6
		RASSF6
		RAB43
		USP44
		LHX9
		SULT1C4
		CP
		VAV3
		DAAM1
		ATP8B1
		TUBB1
		PDGFC
		ARMCX2
		PARM1
		DACT1
		CAMK2N2
		TNNT1
		CSF2
		ITPR3
		PIK3IP1
BE2C-GAC-UP	390	PCDHB15
		CEP250
		ERAL1
		HSPB1
		TMEM151A
		MYO9B
		ANKRD13B
		TOP3A
		LRRN2
		SYNGAP1
		BET1L
		CACNG5
		DHRS11
		SMO
		CPNE4
		AL669918.1
		CCDC124
		ARHGAP39
		NCOR2
		C2CD3
		CHRAC1
		RFXAP
		KIAA0100
		KLHL41
		TBC1D17
		PSMD11
		BORCS8-MEF2B
		IRS1
		TMEM104
		ZZEF1
		RYR1
		DLGAP4
		COX10
		AC138894.1
		MED14
		MYORG
		ABCC11
		RHOBTB2
		NFYA
		ATP1A1
		NMNAT2
		MAGEB6
		GNAO1
		FAM189B
		ZFP41
		GGN
		MTHFD1
		SCAMP3
		ASAP1
		CACNA1H
		CNDP2
		CREBBP
		PMVK
		KCNH4
		PROSER3
		AP003419.1
		AL034430.2
		TSHZ1
		TM9SF4
		SUSD6
		ZNF414
		FAM131C
		ZDHHC22
		NAA60
		SLC29A3
		EHD2
		ZNF362
		CACNG2
		SULF2
		AP2B1
		FKBP5
		MAPK7
		HERC3
		GEMIN4
		PHF12
		APEX1
		SHANK3
		SPATA2
		C3orf70
		RAVER1
		PIP5K1C
		ZBTB4
		AC129492.1
		NCOA6
		EPHB1
		NR2F2
		GRID1
		UCP2
		FBRS
		SNAP29
		PTPN23
		NCOA5
		INPPL1
		2024-09-05
		VAC14
		DTX2
		NKAIN1
		MDC 1.00
		POLR3A
		SEC16A
		ADGRE5
		EIF5B
		RINT1
		PLD2
		GATA3
		CEND1
		RIPOR1
		CTNS
		STK36
		SCAMP4
		HNRNPA2B1
		FAM57A
		SF3A1
		PRIMA1
		PALM3
		ZNF142
		MARK2
		ATP6V0C
		PRPF8
		SH3D21
		UBXN11
		NUDC
		ZNF865
		AC073610.2
		ABL1
		NCOR1
		LRRC26
		SP2
		SMPD3
		C15orf39
		UNC13A
		NCL
		PDZD2
		CHCHD10
		NSFL1C
		MT-CO1
		GABRB3
		TAF3
		SLC35C1
		FBXL16
		GLI2
		TP53
		PSMC5
		CLIP3
		SETD1A
		IQSEC3
		AC093884.1
		ZNF512B
		PUDP
		MADCAM1
		SH3BP1
		GJC1
		CYB5D1
		ZMIZ2
		CTDNEP1
		SRM
		MRPS6
		PRKACA
		SNX8
		DLG5
		SELENON
		STX1B
		WHAMM
		CTSA
		UBE2V1
		SCRT1
		ERICH1
		SNRNP200
		CNOT3
		MPRIP
		TXN2
		CRTC1
		GSE1
		P2RY11
		MAP1S
		MGRN1
		SLC25A23
		RPS16
		PRCC
		SRRM2
		ZC3H12B
		MYBBP1A
		SOX18
		ARID1A
		NKIRAS2
		SOX2
		ALPL
		NXPH2
		MAST3
		HNRNPUL2-BSCL2
		RNPEPL1
		TMEM63A
		RFX2
		ADGRB1
		ACTR2
		BCL2L12
		WNK2
		TICAM1
		PLCB2
		PTPN18
		PELP1
		C22orf46
		GPR3
		FASN
		ARHGAP17
		CSGALNACT2
		RNF208
		CMIP
		HIST1H3I
		ANKRD63
		MINK1
		MYO1C
		YWHAE
		SYS1-DBNDD2
		GRIPAP1
		MRPL12
		EDC3
		MAP3K14
		CLPTM1
		RAD9A
		SYN1
		LRFN3
		THAP8
		ZRSR2
		FBRSL1
		TECR
		RAPGEFL1
		TP73
		MT-CYB
		CHRNB4
		MYT1
		CC2D1A
		FLOT2
		FAM222B
		ANKRD42
		RTL5
		CBLB
		FBLN1
		VANGL2
		ZYX
		SF3A2
		RFX1
		PDPR
		SARM1
		SCD
		ASIC1
		ARMH3
		RAB6B
		ANXA2R
		CCDC86
		GID4
		MPP2
		SIPA1L3
		MT-CO3
		ZNF217
		MIDN
		HK1
		ZBTB26
		SETD5
		SIN3A
		WDR60
		PCDHGA9
		CABLES2
		PCGF2
		TNS1
		TBP
		NXF1
		CTSD
		PER3
		TWNK
		PTCH1
		RAB36
		KDELR3
		TMEM184B
		HNRNPH3
		COASY
		RAP2B
		CHMP4B
		GRAMD1A
		KIF3B
		FBXO44
		IVD
		VIPR2
		LSS
		GAR1
		HSP90AA1
		YWHAB
		ZNF618
		SSPO
		ACE
		SLC35A4
		SRCIN1
		PHACTR4
		FOXP4
		PRKCSH
		MOB3A
		GNL3L
		GIT1
		HMGN5
		NBEAL2
		CNNM1
		AC114490.2
		LSM 10.00
		ZDHHC8
		DVL3
		HRH3
		MLLT1
		MAP2K5
		RAI1
		CNIH2
		SNRPA1
		WIPF2
		GRID2IP
		FOXRED2
		MBD6
		CIC
		TRAPPC1
		SLC16A13
		HAND1
		GGT7
		AP5B1
		CDH1
		AGPAT2
		IGDCC4
		CXCL12
		HNRNPM
		RPA1
		PLEKHM1
		DIAPH1
		MT-ND3
		HPRT1
		IQSEC1
		AEBP1
		PLAGL2
		CELSR1
		WBP2
		MLST8
		EIF3C
		TRRAP
		SLC2A4
		C19orf54
		NCKIPSD
		RAB13
		AKT1S1
		APOBEC3C
		NSRP1
		ARHGEF1
		C6orf136
		DISP2
		SDHC
		YLPM1
		SUFU
		CCDC88C
		SMG6
[truncated: 1,666 more rows]

## Sheet: figure 5-supplement 1B
Names	total	elements
BE2C-GAC-DN BE2C-KGA-DN SKNAS-GAC-DN SKNAS-KGA-DN	44	PXYLP1
		ZNF83
		PLCL2
		PDZRN3
		RGS4
		SDC2
		CHRM1
		TPPP3
		NELL2
		LFNG
		ZIK1
		COL9A3
		LBX2
		PTPRG
		RGS13
		AKR1C1
		BAALC
		PTGER3
		CALML4
		GALNT13
		ESRRG
		ABCD2
		SPOCK3
		CDH6
		TMEM100
		ZNF429
		SHD
		SACS
		GRASP
		LIFR
		FNDC5
		CA10
		2024-03-02
		EFNB2
		PCDH10
		PCDH9
		LMO3
		CAB39L
		GPRIN3
		KITLG
		SELENBP1
		NPAS3
		SPART
		NDN
BE2C-GAC-DN BE2C-KGA-DN SKNAS-GAC-DN	22	LDB3
		PDE1C
		ATOH8
		PLIN2
		AFAP1L1
		TNNT2
		EGFR
		SAMD11
		SOHLH2
		CYB5R2
		SMAD6
		RERG
		TSPAN8
		FHL2
		CD9
		MEIS3
		HTR2B
		SOX5
		AZGP1
		SALL4
		FGL1
		KCTD12
BE2C-GAC-DN BE2C-KGA-DN SKNAS-KGA-DN	42	CSPG4
		TSPAN13
		C1QL1
		TMEM151B
		TMEM117
		PCDH18
		HSPA8
		ZNF107
		HSPA2
		MRC1
		CABP7
		FAM47E-STBD1
		CSKMT
		POP1
		AC107871.1
		PAXBP1
		SOSTDC1
		PFKFB4
		ELMO3
		TEX15
		DNAJB1
		GPR162
		ZNF117
		PAG1
		LRRC69
		ZNF138
		C12orf29
		MAP2K6
		SH3BGRL
		TMEM169
		HSPA1A
		RGS2
		DNM3
		SESN3
		VWDE
		TDG
		IFIT1
		ADGRL3
		FIGNL2
		HSPA1B
		CSRP2
		PPFIA4
BE2C-GAC-DN SKNAS-GAC-DN SKNAS-KGA-DN	3	ABCC9
		CCDC122
		ZNF28
BE2C-KGA-DN SKNAS-GAC-DN SKNAS-KGA-DN	32	SLC18A1
		CDH10
		CHST11
		SNAI1
		TANC2
		EPHB3
		HS3ST5
		NUFIP1
		HMGCR
		KMT2D
		PGF
		ZNF483
		MVK
		TERT
		CCDC85C
		MSMO1
		ZNF404
		KAZN
		INSIG1
		GNB3
		WDR4
		STX16-NPEPL1
		HSPE1-MOB4
		P2RY6
		DDN
		ABAT
		BICC1
		HSPH1
		GNA14
		EGLN3
		SYT9
		APBA1
BE2C-GAC-DN BE2C-KGA-DN	352	HSD17B1
		C1RL
		CNGB1
		LYG1
		KBTBD8
		HCN1
		ARL 1.00
		XK
		CHRM5
		MET
		PCSK1
		PCARE
		TMEM132E
		ZNF718
		SERPINF1
		STK26
		CAND1
		ENTPD3
		ASPRV1
		TRPM6
		MCUB
		SLC8A1
		CECR2
		SSTR2
		SIAH3
		SERPINB9
		NEFH
		CABP1
		CHST15
		TMEM98
		P2RX3
		RXYLT1
		C12orf75
		PXDN
		PPP1R9A
		CLCN4
		SLC9A9
		EDNRA
		PIK3AP1
		ZNF395
		AMD 1.00
		GCA
		CD99
		ZBTB20
		ADAMTS2
		HOXD13
		DNHD1
		STON1
		UBE2N
		SYTL5
		RAB38
		AC067968.1
		SLC35F1
		VSTM4
		CMYA5
		GNRH1
		CPVL
		SGK1
		DNAJB4
		CNTNAP3B
		DSE
		MAP7
		ZNF439
		TAC3
		ZNF442
		RGS8
		SPAG6
		BMP7
		USH2A
		C6orf141
		CHN2
		CD200
		COL19A1
		ZCCHC10
		NACA
		SGCZ
		SLC44A5
		SNCA
		ABRACL
		ZNF530
		MCTP2
		POU3F2
		ABCA12
		GYG2
		HUNK
		PKP2
		SAMD5
		GABRA1
		GREB1L
		PLPPR5
		COMMD8
		B3GALT2
		SMOC2
		HACD1
		GPR155
		DIPK2A
		DCDC1
		ZNF676
		MDGA1
		ZNF84
		EMB
		ANO4
		SLC44A3
		ZNF493
		ADCYAP1
		AGRN
		TCEAL7
		SERPINI1
		NDRG1
		SESN1
		THBS4
		DOK1
		ARHGEF28
		UPB1
		DIABLO
		CNTN1
		MGAT4C
		ARHGAP29
		WNT11
		NRG3
		F10
		HCFC2
		BTBD11
		NID2
		ZNF415
		FGF10
		MBNL3
		PCDH17
		ZNF730
		TRPM3
		STK32B
		IL10RA
		VCAN
		ADAMTS3
		SLC39A8
		NHS
		CDH7
		EXOSC4
		FGF13
		AP001267.5
		PDCD1
		MTERF3
		CHURC1-FNTB
		GABRG2
		ATP10D
		SLC46A3
		HOOK1
		KCNH7
		PLEKHF1
		MICAL1
		DCHS1
		TDRD7
		CPE
		SLCO5A1
		ZNF418
		TXLNB
		PGAM2
		OLFM3
		GPR139
		ANKMY2
		TMTC1
		STMN2
		ETV1
		PARP9
		ZNF57
		MINAR1
		TAS2R50
		TRIM36
		AMHR2
		HGF
		SLC38A11
		ZNF850
		ZNF440
		AC073611.1
		MCTP1
		ERBB4
		TSPAN11
		CHST8
		RIDA
		SUSD5
		GAL3ST3
		COL22A1
		KANSL2
		MATR3
		FAM43B
		ZSCAN5A
		C8orf58
		VSTM2L
		FKBP7
		TRPM8
		CDK15
		ZNF454
		BCO2
		NFATC4
		DNAJC22
		CA14
		MXRA8
		ZNF274
		YARS2
		SLC2A13
		GDF6
		SEMA3A
		CYSLTR2
		ABCA1
		SLC8A3
		RNF34
		CCT2
		CCSER1
		ZNF665
		TBX2
		FGD4
		FAM135B
		FAT2
		TMEM273
		NRP2
		SIRT4
		FAM156B
		ARL4C
		PTPN20
		GNB1L
		PRSS35
		PROKR1
		DYRK2
		ARNTL2
		ZNF595
		ASPH
		LEF1
		BICDL1
		PITX2
		NPTX2
		TEAD2
		TAS2R19
		GABRB1
		FZD7
		PPHLN1
		CRB2
		ST8SIA1
		ANKRD46
		LRATD1
		PCDHA9
		EDNRB
		RSPO1
		HS6ST2
		SCGN
		LIN7A
		CYP7B1
		GPR176
		EGFLAM
		PAK3
		DGKB
		SLCO1A2
		DIRAS2
		USP45
		RIMKLB
		GALNT7
		ZSWIM6
		C8orf88
		HPGD
		DNAJC12
		NAGS
		COX4I2
		WASF3
		CHODL
		KPNA5
		TMPRSS15
		ISG15
		DGKK
		SLC7A2
		DDX55
		THAP2
		PTPRK
		SGPP2
		KREMEN2
		SIK1B
		LAYN
		ZDHHC15
		TPRG1
		PMEL
		CD24
		ZNF732
		S100A4
		PPEF1
		AL354822.1
		SLC2A12
		PCGF5
		YIPF1
		NELL1
		LARGE1
		PCDH19
		GRIK5
		FUT9
		AC068547.1
		TSHZ3
		DOCK10
		CNTNAP3
		MDK
		LDB2
		NECAB1
		NLGN1
		RANBP17
		GPR146
		RYR2
		CCDC169
		TMEM170B
		CBLN4
		TUSC1
		LOXL3
		ANAPC5
		NPPC
		SCML1
		KCNH5
		ATP6V1G2-DDX39B
		C2CD2
		GABRA4
		FAM133A
		AQP5
		ZNF626
		C11orf1
		HMGCLL1
		SOCS2
		ZNF680
		SLITRK1
		NFKBIE
		ME3
		LINGO4
		SYT17
		FAM114A1
		ZNF888
		PON2
		ST8SIA2
		RNF130
		LAMA4
		F3
		EMILIN3
		FMNL2
		PHYHD1
		PRSS53
		LHX9
		CP
		OCA2
		SLC17A8
		MSANTD2
		CRACR2B
		ZNF600
		MTERF2
		SEMA3C
		ATF7IP2
		SMIM18
		C2CD4A
		CDX1
		FRMD4B
		UGT3A2
BE2C-GAC-DN SKNAS-GAC-DN	7	NTRK1
		MAPK10
		AP002956.1
		KIF21A
		RPL21
		KCTD16
		SPARC
BE2C-GAC-DN SKNAS-KGA-DN	11	NUTM2B
		CMPK2
		NME1-NME2
		NGFR
		SVIP
		C7orf61
		TMEM14A
		LIG4
		PCDHAC2
		ZNF443
		KIF20A
BE2C-KGA-DN SKNAS-GAC-DN	12	PGBD5
		MED12
		PDGFRB
		DIXDC1
		ARGLU1
		SYN2
		PLPPR4
		OBSCN
		ZFP82
		ZNF30
		EPB41L5
		COL6A6
BE2C-KGA-DN SKNAS-KGA-DN	45	AEN
		HIC2
		AL136295.5
		FAM98A
		VWA5A
		B3GNT7
		GUCA1B
		AL445685.3
		RIMBP3
		ZNF667
		ZFPM2
		BAG3
		HSD17B7
		AC138811.2
		URB2
		IFFO1
		CSDC2
		FZD5
		KCNG3
		DPF1
		HPDL
		GSDMB
		GDF11
		TMEM189-UBE2V1
		SLC10A5
		CTRL
		AC004922.1
		FRMPD1
		ZNF823
		FAM111B
		SYNM
		POMGNT2
		GEMIN5
		ZNF519
		FLNC
		CUZD1
		ATP2A1
		MFSD2A
		DNAJA1
		MAP6D1
		ITPRIPL1
		TFRC
		ZDHHC11
		SOX11
		MFSD5
SKNAS-GAC-DN SKNAS-KGA-DN	403	PLCE1
		CXCR4
		ADAM12
		2024-09-03
		FAT4
		FXYD6
		ANKS4B
		LRRN2
		PCYT2
		AC092835.1
		BSN
		SMO
		TEK
		FEV
		ALDOC
		RNF103-CHMP3
		KPNA3
		GDPD5
		PRR16
		SLC27A3
		HS3ST1
		ROR2
		ETNK2
		NPW
		HCRTR2
		SON
		GCK
		PWP2
		BAMBI
		EBPL
		CHST6
		SMAD9
		CNTFR
		NACAD
		IL6R
		CHRNB2
		COL7A1
		ULBP3
		CBFA2T2
		ENHO
		COLEC11
		PSG4
		PRR5
		TIAM1
		GNAO1
		AC106886.5
		CAPN6
		RIC3
		PPARGC1A
		ARHGAP42
		DOK4
		CRABP1
		CENPJ
		GPR158
		NDRG2
		SLC2A10
		TMEM179
		ARHGEF26
		ASTN2
		AC073508.2
		THY1
		NSG2
		KALRN
		TRPA1
		ZBED6CL
		SQLE
		TRIM63
		MAP1A
		NPIPB5
		CCNK
		SC5D
		LRRC61
		TOR2A
		MGP
		MVD
		TMOD2
		FAM122B
		TSPYL5
		PCDHA12
		PITPNM2
		KANK4
		NLGN3
		BRICD5
		PCYT1B
		CDH20
		CA12
		PRRX2
		MMP24
		PLXND1
		TP53I3
		SLC25A15
		SLC26A6
		PCSK1N
		SLC25A30
		CACNA2D2
		ADGRG1
		MIPEP
		ARHGDIB
		GGT1
		SOGA1
		LRRC63
		SLC27A6
		STARD8
		ANKRD18B
		FLT1
		CCDC74B
		LRRC32
		CRABP2
		CKMT1B
		GATA3
		PALM
		MPZ
		GPR20
		ISLR
		RHOU
		NBEA
		CARD10
		ENOX1
		ACSBG1
		EML6
		LRP8
		PALMD
		ADGRG2
		TMEM50B
		FBLN2
		SULT1A3
		CKMT1A
		RTEL1-TNFRSF6B
		ZNF433
		FAM156A
		ZNF423
		GPER1
		UNC13A
		APLN
		FBP1
		PDE6B
		KLHL31
		RAB34
		RB1
		PTPRN
		POLR2A
		SDC3
		MICU2
		CCDC180
		SCG3
		TSPAN18
		GIPC3
		ISOC1
		FBXL16
		UNC80
		SPSB4
		IGSF9B
		OLFML3
		ALG5
		ABCA2
		LCP1
		MROH6
		SEMA3F
		PREX1
		NHSL2
		POM121C
		HMGCS1
		ATP2B3
		C11orf96
		PSPC1
		LTK
		AKAP11
		EPHA8
		ARMCX4
		PPARGC1B
		SFXN5
		SESTD1
		FAM222A
		SIK1
		IL1R1
		EVPL
		KCNJ8
		MAB21L1
		SOX18
		SI
		SYNGR1
		GPR75
		PYCARD
		PDE4A
		NXPH2
		ABLIM1
		AS3MT
		ZNF22
		HMGB1
		MOB3B
		ACTR3C
		TSPAN32
		SLC6A2
		PTN
		DHCR24
		LRP3
		ADGRB2
		ID3
		SLC9A5
		RAB3C
		FASN
		RFC3
		KCNIP3
		PTPRZ1
		ZNF704
		UAP1L1
		SLC18A3
		KCND1
		C1QL3
		DGKH
		AL133352.1
		ATP11A
		GREB1
		INSC
		JAKMIP2
		MRAP2
		SLC40A1
		CADM2
		CD36
		PRKG2
		LRRC17
		KBTBD6
		RAP1GAP
		GRK3
		KCNH2
		AC074143.1
		GALNT5
		CDKL4
		TRO
		GTF3A
		PLCH2
		ZNF670-ZNF695
		PCDHB11
		PRRT4
		MPV17L
		GPALPP1
		OLFM1
		HLA-DQB1
		MGAT5B
		EPB41L1
		APLP1
		NAA16
		USPL1
		TMEM246
		SMIM10
		PROSER1
		ARHGAP28
		RTL5
		TAS2R46
		EYA1
		GTF2F2
		AL121768.1
		ANXA6
		CDADC1
		FBLN1
		ANKS1B
		JAKMIP1
		CD248
		ELN
		CERS1
		LZTS1
		RHBDL3
		HSPA6
		HSF4
		KLHL35
		IRAK3
		SPEN
		PDS5B
		MPHOSPH8
		NRG2
		TUB
		ARRB1
		KCNK1
		LCTL
		PLCD4
		LHFPL4
		RBPMS2
		JAZF1
		ZNF724
		SULT4A1
		B3GLCT
		AP3B2
		RAPGEF4
		AL035461.3
		NSDHL
		RIPPLY2
		LSS
		TMEM154
		UBAP1L
		PMF1-BGLAP
		RNF165
		LAMP5
		XPR1
		L1CAM
		SKA3
		ZC3H13
		ENG
		IQCN
		TBC1D4
		PLA2G3
		MED4
		C11orf21
		PCDH1
		NFASC
		POMP
		ADAM33
		ZNF491
		LIME1
		CNIH2
		MYRF
		BLACAT1
		ID4
		ADAMTS1
		UBL3
		PNMA8B
		TRIM13
		CYGB
		TFDP1
		ADORA1
		GRIN2D
		SAP18
		RHOB
		FAIM2
		PHYHIPL
		ACAT2
		IDI1
		AC131160.1
		AEBP1
		SHROOM3
		TTYH2
		AL157392.5
		AL049697.1
		NOS3
		DDC
		CFAP410
		KCNIP4
		LNX2
		TMEM144
		TMEM249
		PCDHA3
		CAPN5
		CADM1
		TMEM198
		KIAA1614
		KCNC4
		TLR4
		DIPK1A
		C3orf18
		DEPTOR
		DNASE1L2
		ARL 10.00
		FAM124B
		NCALD
		AC242842.3
		SARDH
		SYNJ1
		RADX
		MYRIP
		CAMKV
		S1PR5
		ZMIZ1
		RIMS2
		MTRF1
		NPY2R
		PKDCC
		SHROOM2
		INO80B-WBP1
		PHETA1
		HS6ST3
		HLA-DQB2
		CCN3
		FAM9C
		IL11
		RASL11A
		TCF7
		PDZD4
		FREM1
		SYNPO
		CTNNA2
		PEG10
		ASCL1
		CTHRC1
		RELN
		FP565260.2
		TTC9
		NOTCH3
		RBP1
		ZKSCAN7
		TRNP1
		RUNDC3A
		CISH
		AC026464.6
		HEYL
		NT5C1A
		SFRP1
		SUCLA2
		TRIB2
		NPTXR
		RETREG1
		IGF2BP1
		HLX
		KBTBD7
		IL11RA
BE2C-GAC-DN	194	C10orf90
		ANKRD36B
		ZNF799
		CUBN
		LCORL
		CCNB1
		DCLK3
		CAPNS2
		HLA-DRB5
		OSBPL8
		MAOA
		SLC6A15
		AC004086.1
		CETN3
		KBTBD3
		BCHE
		ZNF605
		PRPS2
		CDK17
		AC022414.1
		FUT4
		PLCXD2
		ARPC3
		ASAH1
		FN1
		AC116366.3
		SCHIP1
		SCN1A
		MAGOHB
		DYRK4
		CCDC113
		ALDH6A1
		GLDN
		SERTAD1
		HERC6
		ISCU
		ACBD7
		VEZT
		SGK2
		SCCPDH
		ZNF790
		SPSB2
		ENPP2
		SNHG32
		LZTS3
		PTTG1
		COX6A1
		CD14
		CRADD
		RPLP0
		ZNF528
		AKR1E2
		MAP3K21
		YAF2
		ALOX5AP
		ZNF793
		KCNK9
		PUS3
		TBC1D3G
		MELTF
		ASPDH
		TAGLN3
		ZNF211
		NACA2
		CD163L1
		MGST2
		APOLD1
		TUBA1C
		C2
		SNCG
		MRPS36
		GNG11
		PKIA
		AC073896.1
		PLGLB1
		LOX
		DNAH3
		APH1B
		NPIPB6
		ADM
		NDUFA12
		RPP25L
		ZNF135
		SARNP
		INHA
		MRPL51
		RPS25
		MYL6B
		AC003005.1
		RBIS
		FAM20C
		ERGIC2
		MYO1D
		DYNLT3
		NPIPB12
		CRB1
		PSD3
		CERS4
		MICU3
		CCDC59
		ZDHHC2
		CNTNAP3C
		ZNF347
		CLDN4
		RAB37
		ZNF596
		ANKAR
		TMEM237
		FAM216A
		ZNF547
		APOB
		CASP8
		CFH
		CDC25C
		CXCL11
		AKR1C2
		MYL6
		STBD1
		NEK7
		ACTR6
		TMPO
		CDCA7L
		LEPR
		SLC43A3
		AOC3
		TMTC3
		GAS2L3
		EFNA1
		SULT1A1
		UQCRB
		AC083977.1
		ZNF578
		CRISPLD1
		SLC44A1
		IER5L
		OXR1
		C12orf60
		IPMK
		NDUFB6
		S100A6
		PFDN5
		NTRK3
		C12orf57
		KLHL32
		ANGPT2
		TRAPPC13
		EIF4B
		ITGA4
		EDIL3
		NCKAP5
		ARHGAP18
		INPP4B
		IGSF10
		CYTL1
		UQCC2
		C1GALT1C1L
		TBPL1
		ST20
		FLACC1
		MICB
		ZNF784
		EFEMP2
		CORIN
		TCEAL5
		ST6GAL2
		TMEM116
		ADCY6
		CRYGS
		CDKN1C
		AL121758.1
		ROBO2
		DNAJB5
		ZNF525
		HMMR
		NEDD9
		AC008770.4
		RHOBTB3
		PDLIM3
		MYO1G
		NDUFA9
		PAPLN
		LRP4
		PPP1R3C
		POP5
		APOA1
		ETNK1
		RIMBP3C
		MCF2L2
		SCN2B
		SCG5
		RAB43
		ZNF678
		PARM1
		DHRS2
BE2C-KGA-DN	202	GNL3
		G3BP1
		DTNBP1
		ZNF66
		CNN1
		TAS2R30
		DCAF4L1
		KCNC1
		GATA6
		OTUD3
		GCLM
		RAB35
		TVP23A
		TOX3
		CYP1A1
		BDH2
		EZR
		ADGRG5
		IGDCC3
		SMTNL2
		VWA1
		VSIR
		VRK2
		PACSIN3
		TIMM17A
		POLR3G
		TLX1
		BCL7A
		STK3
		HNF4G
		GPR157
		AL022238.4
		SDK2
		AMIGO3
		FGFR4
		UNKL
		AC092338.1
		BEND4
		ADCYAP1R1
		LRRC39
		HABP2
		SLC2A1
		PRDM1
		MTUS2
		DBP
		CD302
		LPAR3
		LDLRAP1
		TAS2R5
		MSH4
		FAM117A
		HDHD3
		PLGLB2
		HOXD10
		NKX3-1
		AQP3
		ZNF878
		PDLIM4
		HLA-DPB1
		SLC30A1
		AC025165.6
		CD247
		ATP2B4
		HTATSF1
		GAS2
		SNRNP35
		DDX17
		LRRC1
		CCDC168
		GALT
		KANK2
		MT1F
		CARNMT1
		TGFBR3
		AC091021.1
		TOR4A
		GPR63
		ZNRD2
		KDM2B
		TPPP
		DEDD2
		MARS2
		AL513165.2
		MAP3K9
		CD3EAP
		SRSF12
		S1PR3
		CDIP1
		LZTS2
		C1R
		2024-09-14
		KIF7
		CILP
		IQCK
		KCNF1
		RHOF
		TAS2R10
		KIAA1522
		CRY2
		BASP1
		ZNF202
		THAP11
		PCDHA4
		VAMP1
		NPR 3.00
		CSTF3
		SLC15A4
		MBOAT1
		AC013717.1
		FAM102B
		AC002996.1
		NOP2
		ZNF774
		CCHCR1
		NTNG2
		NACC2
		ECE2
		SCD5
		CNN3
		DTX1
		FBXO33
		ZNF778
		CYP4V2
		SLBP
		SLC19A3
		NBPF20
		SLC9A7
		SELENOW
		PCDHGC4
		LPCAT2
		MAN1C1
		CPT1B
		MPP1
		IL34
		ALDH1B1
		NT5DC3
		KBTBD11
		ARMCX5-GPRASP2
		CCSAP
		CDC42EP2
		KDM8
		NR6A1
		HHIPL2
		USP53
		LRRTM1
		MT1X
		NUMBL
		AC009119.2
		AC004556.1
		ZNF761
		ELOVL4
		AL157935.2
		TAS2R14
		TEF
		LGALSL
		DLL3
		FBXO21
		NPFF
		DOCK9
		SLC5A5
		CLEC14A
		EIF5
		DENND1B
		SLITRK5
		RAB3B
		NPEPL1
		SLC18A2
		ETHE1
		GLUL
		PURG
		TNFAIP8
		SIX4
		CHRND
		CNTNAP2
		TRIM71
		SEMA3D
		SLC41A2
		DYNC1I1
		CHRM2
		SYNPR
		C6orf132
		ARHGAP6
		NOG
		CCDC146
		EFNA3
		GPRC5B
		SFT2D1
		PYGM
		KCNK5
		CDKN2A
		CHN1
		IL2RB
		SNAP91
		TAS2R20
		CDKAL1
		SUOX
		IL7
		SLC16A10
		GNL2
		N4BP3
		GRIP2
		RNLS
SKNAS-GAC-DN	321	FSTL1
		TMEM216
		SMARCD3
		PBX4
		KCNG1
		PTPRR
		ZNF572
		TSC22D1
		EFNB1
		SLCO2B1
		ANXA3
		COL1A1
		NEIL1
		TNFRSF9
		NAT8L
		TIAL1
		UFM1
		APOE
		ALDH2
		RFXAP
		MAPK12
		INSRR
		RASA4B
		MYO15B
		SAMSN1
		ID1
		CFAP221
		HHLA2
		UPF3A
		DBH
		COG3
		NDNF
		SCN11A
		NEK6
		PCDHGC5
		IFI16
		AL136295.4
		RTEL1
		CSRP1
		TNF
		CHAMP1
		PCBP3
		FST
		PROSER2
		ABCC2
		LRP5L
		TMIGD2
		LGR5
		LRP1B
		SECTM1
		XKRX
		ADAMTSL4
		SLC25A34
		NEGR1
		HPGDS
		SNTA1
		FPGT-TNNI3K
		IPO5
		LST1
		IRS2
		PODXL
		TMC6
		C10orf143
		SPRYD7
		EPB41L3
		NPIPA5
		L3MBTL4
		DCUN1D2
		SCARF2
		NSUN5
		SLC37A1
		GATD3A
		ADAMTS17
		HLA-DQA1
		LSAMP
		ZNF846
		PPARD
		MCF2L
		PLPP4
		HEATR5A
		MRAS
		AC233992.2
		CALCB
		CDON
		POTEF
		SNX18
		TDRD3
		BIVM
		DZIP1
		SIRPA
		AGAP6
		KCNA3
		SLC2A6
		AD000671.2
		D2HGDH
		FEZ1
		RNASEH2B
		HLA-DQA2
		COL6A5
		LACC1
		TBX3
		AC093323.1
		MRPS31
		IKZF4
		ZNF853
		PAN3
		SPATA6L
		ADORA2B
		HTR1D
		CRIP1
		NPIPB4
		GRM7
		MAMDC4
		DCXR
		ZMYM2
		FBXL3
		CLEC2D
		SLC7A1
		PTPRM
		ZNF660
		CUTC
		FSBP
		HSBP1L1
		CD22
		DLC1
		ETFB
		NPIPA9
		LRRC75B
		NEURL1B
		RIMS4
		IGFBP3
		LMO1
		PITPNC1
		JDP2
		ZNF804A
		PRPF40B
		ADAM11
		AL135905.2
		RPRM
		BMP2K
		PLEKHA6
		COL27A1
		CCDC78
		TMEM215
		PHF11
		CPNE7
		TYMP
		APOC1
		CDK3
		THNSL2
		NCR3LG1
		FNBP1
		CHRNA7
		AC004551.1
		RAP1A
		TUBGCP3
		ZNF85
		UNC5B
		NRP1
		ST6GALNAC5
		RXRA
		CIB2
		COG6
		DSCAML1
		GABPB2
		DACH1
		HAGHL
		MIS18A
		FO681492.1
		DPP4
		RAP1GAP2
		NPB
		MARK1
		VWA8
		CSF1
		AC105052.1
		TLX2
		BDKRB2
		ADAMTS9
		ADORA2A
		ESYT3
		WTIP
		APLNR
		VPS36
		MMAB
		2024-09-04
		DNAJC3
		LITAF
		SCUBE1
		ASAP3
		ADGRL1
		ZNF585B
		HTR3B
		RASA4
		OAS3
		RAB27B
		SLC16A9
		SUGT1
		LTB
		CARS2
		ADAMTS4
		FAM167A
		ZFP30
		N6AMT1
		VTN
		TPM1
		MTIF3
		SEMA7A
		PCID2
		PKNOX1
		FAM166B
		PCDHGA9
		ADAMTSL2
		FAM155A
		PER2
		PTX3
		PRUNE2
		SMAD4
		MST1
		GLYCTK
		AC136616.1
		SLITRK6
		EXOSC8
		SLC35G5
		POPDC2
		ACADS
		SMIM11B
		EPHX2
		PPT2-EGFL8
		C4orf50
		RAB39B
		CASP3
		ACSS2
		C16orf74
		INAVA
		ACSS1
		MMP28
		SEMA5B
		ZDHHC8
		AP000311.1
		PLXNA2
		ITGA2B
		LRRC55
		PLEK2
		LYN
		PRSS12
		HOMER2
		PABPC1L
		SAMD14
		NAXD
		NUP58
		MYCBP2
		HADH
		AC010327.1
		CX3CL1
		ATP8A1
		PARP10
		RAPGEF3
		TNFRSF1B
		NAV1
		TNNI3K
		CTSL
		THBS2
		LRRC37A3
		STAP2
		IKBKE
		CYP51A1
		MMP17
		LRRN3
		SUPT20H
		CDC16
		PPFIBP2
		RNF219
		ARHGEF6
		IL33
		C21orf59-TCP10L
		CHD5
		SOWAHC
		LY6E
		AP1M2
		ITGA9
		TRIM39-RPP21
		STAC
		L3MBTL3
		MICALL2
		ITGB3
		PRSS8
		RAMP2
		ZNF326
		COL5A1
		ACTA2
		ADAM22
		CNIH3
		IGFBP4
		KIF21B
		ZNF266
		TEX30
		LKAAEAR1
		FAM131B
		GPC6
		ING1
		CARMIL2
		RFX7
		AC003112.1
		AC098582.1
		PTH1R
		CRISPLD2
		SNAI2
		OGDHL
		C20orf204
		HSPG2
		ADCY9
		NOTCH1
		NEK3
		CDKL1
		GPAT3
		S100A13
		AC011511.1
		FLRT1
		SPOCD1
		MMP9
SKNAS-KGA-DN	943	AACS
		PCDHB15
		CIPC
		EIF2B5
		TUBD1
		UTP20
		HSPB1
		GFOD2
		AHDC1
		ZNF785
		SLC7A6
		TMEM151A
		NAALAD2
		MSL1
		CYCS
		HS3ST3A1
		KIAA0895L
		CHORDC1
		ZSWIM1
		SOD2
		PPP1R13B
		ERV3-1
		PAPOLA
		AATK
		SLC4A8
		CERK
		CASP6
		CASTOR2
		IGSF3
		SYNGAP1
		TMEM184A
		POLR3K
		DIP2A
		ARL 15.00
		GINS1
		NASP
		RELT
		KPNA2
		GAREM2
		TMEM52
		NUDT1
		HSPA1L
		DLX2
		AARD
		SPTSSA
		C2CD3
		FOXM1
		SRSF6
		F2RL1
		C1orf216
		EP400
		PRR19
		UBR3
		FABP5
		DNM1
		WBP4
		KIAA0100
		CRELD2
		TONSL
		TMEM120B
		ADI1
		ORC1
		SLC6A6
		AL590560.1
		RAB3A
		AP002990.1
		FUS
		DNMT3B
		MMP15
		TSPYL4
		USP42
		PRR22
		MRPL34
		TMEM104
		RANBP6
		LRRC8A
		ENDOG
		FGFR3
		LRRTM3
		WDR20
		CDC6
		WDR6
		VASH1
		SAPCD2
		TFAP2B
		CRPPA
		ARPC4-TTLL3
		SLC10A4
		GLA
		TENT5C
		LYSMD2
		SPACA6
		TMED9
		KLHL7
		MYORG
		GABRQ
		NKTR
		FKBP4
		SF3A3
		NFYA
		HCFC1
		ACTR5
		CDH24
		DHFR
		MYLK2
		MAD2L1
		ATP6V1C1
		MUC15
		HEXIM1
		ANKRD52
		RBBP6
		RPS6KA6
		SNN
		C1orf112
		FAM189B
		DISC1
		PROX1
		SCN3A
		AC055839.2
		ZNF709
		ZNF738
		MANF
		EIF4E2
		CHAF1A
		ENTPD7
		FHDC1
		CARD9
		GRWD1
		ITSN1
		APBA2
		TTC3
		FANCA
		IGSF9
		GVQW3
		SEMA3G
		EEPD1
		SEC13
		LARGE2
		NCAPD3
		BRINP3
		TUBA1A
		KIAA0930
		NAIP
		CYB561
		TMEM189
		CACFD1
		EPHA7
		NUP85
		GPR135
		ABHD17A
		PLIN3
		PANK1
		LRR1
		IGFLR1
		JRK
		XPO4
		DAND5
		RANBP1
		FDFT1
		CBX1
		LAMTOR5
		TAOK2
		GLIPR2
		SPG7
		ANKHD1-EIF4EBP3
		MCM10
		EME2
		XXYLT1
		RNF150
		SAFB2
		NPY
		PSMD12
		TOX
		AC093155.3
		ACLY
		HPCAL4
		MSS51
		CALB2
		TYMS
		SRRT
		GEMIN4
		LRRC45
		CR589904.2
		ZNF514
		KMT2B
		GAP43
		WDCP
		RRH
		DHCR7
		SRRD
		SLC19A1
		ZWINT
		SLC31A2
		EFCAB12
		NRXN1
		NTS
		DNAAF5
		YJEFN3
		SOCS3
		GTSE1
		CHPF2
		FIGN
		AL360181.3
		AQP6
		VCP
		GBX2
		RAVER1
		RCC1
		PIP5K1C
		TGIF2-RAB5IF
		RHBDL1
		B9D2
		ZNF611
		NCOA6
		HYAL2
		NRTN
		ZMYND10
		ZNF75D
		TNFRSF25
		UBE2T
		AC098588.1
		ADCY1
		GRID1
		INTS5
		EBP
		FN3K
		SRRM1
		WFS1
		DNAJB11
		ZNF608
		GRIN3A
		SYP
		PCDHB6
		TBC1D3I
		ATL1
		C3orf62
		MAGEF1
		NPIPB9
		AK1
		AAAS
		ABCD3
		PTPN23
		CTR9
		BRI3BP
		SRCAP
		HAS3
		OBSL1
		MC4R
		NECTIN1
		FAM126A
		DYRK3
		NKAIN1
		PFAS
		MDC 1.00
		SLC29A4
		EIF5B
		PCDHB14
		KIAA0408
		BRCA2
		SYNE3
		CCDC117
		C5orf63
		C7orf50
		CEND1
		VKORC1L1
		C14orf39
		RNASEH2C
		SCAMP4
		FNIP2
		HNRNPA2B1
		TMEM70
		CYP27B1
		TACC3
		PSD
		AC112128.1
		RBM14
		SF3A1
		FASTKD5
		IQCE
		THSD7A
		ICMT
		GNAI1
		PPFIA2
		CPXM1
		MEX3A
		SOD1
		NUTM2A
		BCR
		FSCN1
		KIAA0391
		TRIM52
		ABCB9
		LNPK
		NAAA
		LAT
		PIF1
		PDP2
		ERP27
		SMARCA4
		CPSF6
		CENPW
		ZDHHC20
		QRICH2
		TENM3
		CLPTM1L
		PRPF8
		HIST1H2BI
		WDR77
		TMC5
[truncated: 634 more rows]

## Sheet: figure 5-supplement 1C
pathway	enrichment	pvalue	count	class
Basal cell carcinoma	0	0.000424814	0	up
Hedgehog signaling pathway	0	0.00132467	0	up
Hippo signaling pathway	0	0.00307494	0	up
Endocytosis	0	0.00364769	0	up
Spinocerebellar ataxia	0	0.00412378	0	up
Neurotrophin signaling pathway	0	0.00451167	0	up
Thyroid hormone signaling pathway	0	0.00498681	0	up
Endocrine and other factor-regulated calcium reabsorption	0	0.0057931	0	up
Notch signaling pathway	0	0.009094	0	up
Insulin signaling pathway	0	0.01029	0	up
Non-alcoholic fatty liver disease	0	0.000278765	0	down
Herpes simplex virus 1 infection	0	0.00103483	0	down
Huntington disease	0	0.00181883	0	down
Vitamin digestion and absorption	0	0.00209879	0	down
Retrograde endocannabinoid signaling	0	0.00536058	0	down
Pathogenic Escherichia coli infection	0	0.00553883	0	down
Parkinson disease	0	0.00564879	0	down
Tight junction	0	0.0100152	0	down
Phenylalanine metabolism	0	0.0140672	0	down
Oxidative phosphorylation	0	0.0145379	0	down

## Sheet: figure 5-supplement 1D
pathway	enrichment	pvalue	count	class
Pathways in cancer	0	0.000177819	0	up
Mitophagy	0	0.000282259	0	up
Breast cancer	0	0.00117371	0	up
Proteoglycans in cancer	0	0.00198895	0	up
NOD-like receptor signaling pathway	0	0.0020208	0	up
TGF-beta signaling pathway	0	0.00242243	0	up
Shigellosis	0	0.00912748	0	up
Mucin type O-glycan biosynthesis	0	0.0119947	0	up
Arginine biosynthesis	0	0.0167108	0	up
Neurotrophin signaling pathway	0	0.0296904	0	up
Taste transduction	0	0.000258735	0	down
Sulfur metabolism	0	0.00878952	0	down
Mineral absorption	0	0.0113092	0	down
Pathways in cancer	0	0.0113703	0	down
Steroid biosynthesis	0	0.0337361	0	down
PI3K-Akt signaling pathway	0	0.0351143	0	down
Histidine metabolism	0	0.0402469	0	down
Terpenoid backbone biosynthesis	0	0.0402469	0	down
Glycosaminoglycan biosynthesis	0	0.0418989	0	down
Th1 and Th2 cell differentiation	0	0.0453688	0	down

## Sheet: figure 5-supplement 1E
pathway	enrichment	pvalue	count	class
Rap1 signaling pathway	0	6.28395e-05	0	up
PI3K-Akt signaling pathway	0	6.61068e-05	0	up
Calcium signaling pathway	0	9.2572e-05	0	up
Salivary secretion	0	0.000452849	0	up
Human papillomavirus infection	0	0.000550112	0	up
Hippo signaling pathway	0	0.00069017	0	up
Regulation of actin cytoskeleton	0	0.000993927	0	up
Circadian entrainment	0	0.00260518	0	up
Inflammatory mediator regulation of TRP channels	0	0.00277759	0	up
Pathways in cancer	0	0.00305717	0	up
ECM-receptor interaction	0	3.0648e-05	0	down
Rap1 signaling pathway	0	0.000124529	0	down
Focal adhesion	0	0.000314083	0	down
Hematopoietic cell lineage	0	0.000436132	0	down
TNF signaling pathway	0	0.000989236	0	down
Proteoglycans in cancer	0	0.0013277	0	down
Dilated cardiomyopathy	0	0.001803	0	down
Human papillomavirus infection	0	0.0029917	0	down
Calcium signaling pathway	0	0.00449186	0	down
Hypertrophic cardiomyopathy	0	0.00587083	0	down

## Sheet: figure 5-supplement 1F
pathway	enrichment	pvalue	count	class
TNF signaling pathway	0	1.91013e-10	0	up
NF-kappa B signaling pathway	0	1.63802e-06	0	up
Cytokine-cytokine receptor interaction	0	3.60182e-06	0	up
Lipid and atherosclerosis	0	3.31862e-05	0	up
Osteoclast differentiation	0	4.13991e-05	0	up
Epstein-Barr virus infection	0	6.74159e-05	0	up
Apoptosis	0	7.58473e-05	0	up
RIG-I-like receptor signaling pathway	0	9.67756e-05	0	up
Influenza A	0	0.000195724	0	up
Herpes simplex virus 1 infection	0	0.000222377	0	up
Spliceosome	0	8.70584e-07	0	down
Protein processing in endoplasmic reticulum	0	8.18207e-05	0	down
Longevity regulating pathway	0	0.000250501	0	down
RNA transport	0	0.000279706	0	down
Legionellosis	0	0.000647058	0	down
Regulation of lipolysis in adipocytes	0	0.00198376	0	down
Steroid biosynthesis	0	0.00304594	0	down
Vibrio cholerae infection	0	0.00401576	0	down
Mannose type O-glycan biosynthesis	0	0.0058077	0	down
Gap junction	0	0.0058766	0	down
