# Supplementary material for: Metabolic reprogramming of cancer cells by JMJD6-mediated pre-mRNA splicing associated with therapeutic response to splicing inhibitor
Source: eLife journal article supplement (doi:10.7554/elife.90993), 2023-11-01
Supplement: data1 [file Figure 8-data source.xlsx]

## Sheet: Figure 8A
JMJD6 Gene Effect (Chronos) CRISPR (DepMap 22Q2 Public+Score, Chronos)	RBM39 Gene Effect (Chronos) CRISPR (DepMap 22Q2 Public+Score, Chronos)
-0.244754	-1.74467
-0.376662	-1.86026
-0.554456	-2.00328
-0.303439	-1.4841
-0.249339	-1.65831
-0.316154	-1.99856
-0.353016	-1.59998
-0.272266	-1.86794
-0.205599	-1.05382
-0.500494	-1.87184
-0.850826	-1.58486
-0.360499	-1.75223
-0.580697	-1.58801
-0.255348	-1.62087
-0.134656	-1.61725
-0.27816	-1.84167
-0.343974	-2.01664
-0.334435	-1.52829
-0.574925	-2.45128
-0.712799	-2.19173
-0.558156	-1.7496
-0.151826	-1.78199
-0.121282	-1.76489
-0.496185	-2.29851
-0.588456	-1.90227
-0.348476	-1.85514
-0.235622	-1.63969
-0.463177	-2.14069
-0.0231634	-1.67009
-0.317926	-1.85318
-0.324867	-2.02095
-0.445607	-2.05276
-0.613177	-1.96685
-0.0235011	-1.55848
-0.451943	-1.93737
-0.43471	-1.79952
-0.391263	-1.84062
-0.304003	-2.04554
-0.356668	-1.48353
-0.364508	-1.98108
-0.0055081	-1.90179
-0.223298	-2.69549
-0.461555	-1.8643
-0.247661	-2.22563
-0.258213	-1.87144
-0.191259	-1.34658
-0.424672	-2.25538
-0.350616	-1.61279
-0.596671	-2.66404
-0.538327	-1.77186
-0.0685109	-1.67615
-0.0319537	-2.17498
-0.517109	-1.85405
-0.381211	-1.56318
-0.386197	-2.02224
-0.389461	-1.39396
-0.421083	-1.95313
-0.641018	-1.96728
-0.345471	-1.64501
-0.572483	-1.99091
-0.179298	-1.36767
-0.284381	-2.67774
-0.542498	-2.27969
-0.254581	-1.89159
-0.372258	-2.16438
-0.194918	-2.01053
-0.181604	-2.10058
-0.536946	-1.15508
0.0313203	-1.94283
-0.491423	-1.64277
-0.280352	-2.08817
-0.376009	-1.82853
-0.355583	-1.82044
-0.228682	-1.84735
-0.38809	-1.95599
-0.427846	-1.66909
-0.924279	-2.0362
-0.450293	-2.24193
-0.425712	-1.67729
-0.0405011	-2.19458
-0.226311	-2.14768
-0.26748	-2.05929
-0.125859	-2.61953
-0.342144	-1.35253
0.432776	-2.21113
-0.583332	-1.94213
-0.0840119	-2.03299
-0.172672	-1.89419
-0.357461	-1.4172
-0.613437	-1.59671
-0.176616	-1.88207
-0.070897	-2.03666
-0.253053	-1.69876
-0.347641	-1.95888
-0.372891	-1.75165
-0.553458	-2.07323
-0.134379	-1.53685
0.0956883	-1.43094
-0.194423	-1.69477
-0.364719	-1.84381
0.020469	-1.85219
-0.36092	-1.75039
-0.106984	-2.20099
-0.195571	-1.6397
-0.272981	-2.04421
-0.486116	-1.93256
-0.531821	-1.61118
-0.822153	-1.16752
-0.45177	-1.97378
-0.674457	-2.36472
-0.541128	-1.87423
1.6e-05	-1.68273
-0.586815	-2.01109
-0.199071	-2.25336
-0.311879	-2.42076
-0.503433	-2.24708
-0.44022	-2.41366
-0.200523	-1.69995
-0.383915	-1.97682
-0.530736	-2.00675
-0.131473	-1.45316
-0.370896	-1.32807
-0.221997	-1.78063
-0.542602	-1.82301
-0.279776	-2.04031
-0.427102	-2.08205
-0.35683	-2.09721
-0.541541	-1.6147
-0.330126	-2.34692
-0.221153	-1.95598
-0.861727	-1.51819
-0.248521	-1.80918
-0.725859	-2.24061
-0.510351	-2.32247
-0.523254	-1.82838
-0.405181	-2.02092
-0.466278	-1.12152
-0.208542	-1.69271
-0.142771	-2.06346
-0.443943	-1.58436
-0.490982	-1.98752
-0.551029	-1.85944
-0.654648	-1.91152
-0.906753	-1.80488
-0.612959	-2.05592
-0.96563	-2.18728
-0.451466	-1.70282
-0.464918	-1.71626
-0.345735	-1.79401
0.0162597	-1.50891
-0.844037	-1.80836
-0.180459	-2.05522
-0.0657595	-1.92607
-0.435774	-1.47447
-0.592989	-1.76989
-0.497648	-2.11369
-0.210248	-1.44772
-0.12658	-1.82991
-0.350839	-1.81915
-0.0043483	-2.05913
-0.29509	-2.0284
-0.138329	-1.74849
-0.148151	-1.71367
-0.206024	-1.36834
-0.302929	-1.67251
-0.812682	-2.32155
-0.384178	-1.9356
-0.572038	-1.43253
-0.649814	-1.87961
-0.188875	-1.53005
-0.164957	-1.86043
-0.435581	-1.8194
-0.431174	-1.45304
-0.442228	-1.91237
-0.422996	-1.77778
-0.66801	-1.91812
-0.181718	-2.0877
-0.534047	-1.45989
-0.42893	-2.04038
-0.244456	-1.42884
-0.144647	-2.06584
-0.327501	-1.95415
-0.245748	-2.33003
-0.50787	-2.08746
-0.26505	-1.8214
-0.302453	-1.95816
-0.55075	-2.1696
-0.497011	-1.95817
-0.51262	-2.23443
-0.272852	-1.66867
-0.377133	-2.26754
-0.786274	-2.10454
0.129485	-1.545
-0.309168	-1.98872
-0.243312	-1.92992
-0.392649	-1.8952
-0.476114	-1.74806
0.0196191	-1.8301
-0.378069	-1.92942
-0.196622	-1.42429
-0.41826	-2.02278
-0.430756	-1.80668
-0.448639	-2.017
-0.23742	-1.99284
-0.254747	-1.52694
-0.502795	-2.1043
-0.255991	-1.26833
-0.0857208	-1.74352
-0.332543	-1.91054
-0.245469	-1.37443
-0.296536	-2.123
-0.622252	-2.34934
-0.664284	-2.15411
-0.345163	-1.93062
-0.477078	-1.82968
-0.123749	-2.24643
-0.46466	-2.19787
-0.140838	-1.90673
-0.468444	-1.57153
-0.349768	-1.9008
-0.419331	-2.16732
-0.747702	-1.39039
-0.461987	-1.76642
-0.668967	-1.79617
-0.394893	-1.80235
-0.0968734	-1.66968
-0.397143	-2.10013
-0.0404322	-2.1823
-0.42694	-2.12856
-0.36208	-1.78817
-0.274761	-2.16432
-0.777604	-1.90957
-0.240419	-1.94168
-0.288946	-1.8426
-0.336949	-1.48753
-0.417364	-1.67272
-0.3791	-1.70638
-0.447418	-1.6962
-0.368918	-1.86558
-0.271432	-2.20364
-0.479688	-2.00574
-0.273251	-1.76343
-0.425432	-1.96118
-0.385381	-1.49629
-0.327753	-1.89882
-0.610705	-2.07942
-0.290869	-2.01525
-0.894504	-1.82507
-0.432108	-1.8434
-0.438123	-1.69858
-0.183482	-1.69708
-0.387064	-1.90407
-0.136464	-2.05593
-0.686748	-1.71321
-0.524711	-2.04845
-0.186444	-2.08641
-0.389813	-2.02345
-0.404898	-2.09233
-0.475243	-1.88138
-0.0628034	-1.45418
-0.284987	-2.00943
-0.655775	-1.82298
-0.439006	-2.15053
-0.339112	-2.02902
-0.563565	-1.88345
-0.487923	-2.08251
-0.209809	-2.54943
-0.63385	-2.07045
-0.275274	-1.9922
-0.265737	-2.08981
-0.596062	-2.24363
-0.392577	-1.79372
-0.342929	-2.10518
-0.427962	-1.72761
-0.397958	-1.65473
-0.236317	-1.79858
-0.624394	-1.71569
-0.449284	-2.03348
-0.532752	-2.28829
-0.432092	-1.46788
-0.418323	-2.2109
-0.354274	-1.6587
-0.406882	-1.76997
-0.324115	-1.75613
-0.602489	-1.38255
-0.498723	-1.39077
-0.434457	-1.80685
-0.306529	-2.64291
-0.456954	-1.95376
-0.253112	-1.60635
-0.851793	-2.22585
-0.559337	-2.01312
-0.501549	-2.10359
-0.369172	-2.26732
-0.308107	-2.08969
-0.201248	-1.69503
-0.61799	-1.94228
0.0317971	-1.71719
-0.618719	-1.59905
-0.369375	-2.04938
-0.142522	-1.33497
-0.438111	-1.83447
-0.580668	-2.36727
-1.14155	-2.14388
-0.285278	-2.19427
-0.517088	-2.0562
-0.38126	-2.34716
-0.441752	-2.15448
-0.288394	-1.49783
-0.435386	-1.94611
-0.383279	-2.22154
-0.47768	-1.63203
-0.672072	-1.66665
-0.255688	-1.60549
-0.100736	-1.82894
-0.35532	-2.10069
-0.456711	-1.84583
-0.192183	-2.018
-0.373465	-2.05558
-0.226804	-1.62213
-0.6355	-2.17548
-0.432537	-1.91967
-0.551265	-1.75117
-0.61371	-1.9163
-0.25828	-2.08127
-0.265938	-1.89536
-0.47395	-1.72422
-0.434428	-1.55195
-0.64654	-1.73218
-0.256979	-2.06845
-0.224828	-2.15485
-0.48255	-1.86968
-0.235432	-1.6297
-0.525411	-1.91898
-0.158323	-1.64387
-0.359295	-2.17908
-0.0031754	-1.4065
-0.256201	-2.08439
-0.11526	-1.60425
-0.297535	-2.06921
-0.22775	-1.87331
-0.565391	-2.05054
-0.749671	-2.0304
-0.137344	-1.56974
-0.44962	-1.57147
-0.233972	-2.20118
-0.303412	-1.18879
-0.316421	-1.72971
-0.435209	-1.78536
-0.306473	-1.97471
-0.419062	-2.1349
-0.172639	-2.0522
-0.452576	-1.74242
-0.443121	-1.70946
-0.339301	-1.75411
-0.124184	-1.89941
-0.693518	-2.15286
-0.149573	-1.48614
0.0236093	-1.50049
-0.318608	-1.9431
-0.465545	-2.34089
-0.196754	-2.04179
-0.767552	-2.20618
-0.476616	-2.04344
-0.201377	-2.05127
-0.190156	-2.01854
-0.120592	-1.87029
-0.319562	-1.65177
-0.269595	-1.99369
-0.626435	-1.79115
0.135654	-2.02604
-0.305273	-1.59712
-0.926878	-2.30187
-0.3546	-1.84232
-0.789656	-1.70144
-0.0946866	-1.92269
-0.504944	-2.12463
-0.338334	-1.7638
-0.455477	-1.76207
-0.518763	-1.93904
-0.3628	-1.85248
-0.357743	-2.07673
-0.1398	-1.35403
-0.457348	-1.46007
-0.698567	-2.09904
-0.545572	-2.35692
-0.238816	-2.0063
0.0936959	-1.75571
-0.490356	-1.75711
-0.533064	-2.17105
-0.525491	-2.57041
-0.400427	-1.97423
-0.552431	-1.74407
-0.233326	-1.79891
-0.404354	-2.21337
-0.274701	-1.76541
-0.0559615	-1.64258
-0.337924	-1.4543
-0.627147	-1.76754
-0.600107	-1.89004
-0.178945	-1.75755
-0.381898	-1.92684
-0.17664	-2.15087
-0.587987	-2.14338
-0.42551	-1.81673
-0.184631	-1.68813
-0.67183	-1.52943
-0.385174	-1.45434
-0.603384	-1.93779
-0.315582	-2.10236
-0.300633	-2.08297
-0.400256	-2.18311
-0.221984	-1.28564
0.0019162	-1.67651
-0.391779	-2.88409
-0.200543	-1.69583
-0.678223	-2.36195
-0.319292	-1.68259
-0.375113	-1.85619
-0.395504	-1.76462
-0.30726	-1.94948
-0.63757	-2.12072
-0.525937	-1.87159
-0.603774	-1.73001
-0.483448	-2.00529
0.0678215	-1.93262
-0.338545	-2.11407
-0.156163	-1.55065
-0.390721	-2.08139
-0.52855	-2.497
-0.122571	-1.31519
-0.337542	-1.87857
-0.457543	-1.65839
-0.531927	-1.28639
-0.551353	-2.16612
0.252199	-1.2259
-0.208932	-1.46205
-0.166684	-1.67429
-0.247776	-2.02438
-0.166084	-2.14503
-0.26007	-1.71287
-0.388806	-1.42637
-0.512652	-1.97417
-0.671485	-1.6178
-0.455675	-2.09271
-0.490903	-2.28526
-0.439357	-1.4571
-0.477214	-1.83087
-0.114474	-2.02535
-0.341193	-1.72291
-0.281949	-1.84814
-0.328895	-1.85967
-0.44693	-2.06907
-0.663655	-2.17245
-0.337264	-2.17264
-0.455519	-1.53657
-0.414582	-1.9794
-0.589959	-1.77445
0.173594	-1.62957
-0.534033	-1.73999
-0.221382	-1.65382
-0.302432	-1.74817
-0.956959	-1.87363
-0.701278	-2.02946
-0.576583	-2.30425
-0.193714	-2.08966
-0.570896	-1.7922
-0.295177	-1.74732
-0.603164	-1.98204
-0.975744	-2.29524
-0.50231	-2.38324
-0.535238	-2.15234
-0.287609	-1.52923
-0.41166	-1.88072
0.0282177	-1.67311
-0.199679	-1.58194
-0.442605	-1.93329
-0.233371	-1.65842
-0.467297	-1.93649
-0.0767635	-2.07134
-0.24397	-1.72943
-0.350225	-1.99742
-0.437776	-1.61925
-0.0955804	-1.73029
-0.13659	-1.64397
-0.534163	-1.8281
-0.0150632	-2.22398
-0.100215	-2.03059
-0.491884	-2.16811
-0.390872	-2.31167
-0.339749	-1.84494
-0.202266	-1.47207
-0.442472	-1.52582
-0.203758	-2.30417
-0.332174	-1.73445
-0.240894	-1.90037
-0.200813	-2.00203
-0.363864	-2.10618
-0.629557	-1.6891
-0.373807	-1.74861
-0.50056	-2.25876
-0.494015	-1.57142
-0.418729	-2.00985
-0.419591	-2.16807
-0.265791	-1.98809
-0.517973	-2.04643
-0.930605	-2.41201
-0.327693	-1.75764
-0.497106	-1.97795
-0.27275	-1.89858
-0.637726	-1.49894
-0.418769	-1.93875
-0.211101	-2.12131
-0.289647	-1.97161
-0.331352	-1.74791
-0.646263	-1.62579
-0.343685	-1.72246
-0.181585	-2.55124
-0.415535	-2.2375
0.0211595	-1.49728
-0.202758	-1.8749
-0.654641	-2.44209
-0.413484	-2.04808
-0.546403	-1.29236
-0.365451	-1.64097
-0.334807	-1.63876
-0.343008	-2.26334
-0.269326	-2.15068
-0.153889	-1.9659
-0.479857	-1.85079
-0.659438	-1.99695
-0.391037	-1.81317
-0.371693	-1.98457
-0.250992	-1.76113
-0.373096	-1.77826
-0.345972	-1.53977
-0.259815	-1.6871
-0.0833912	-1.73824
-0.252434	-1.55921
-0.316165	-1.62791
-0.529851	-2.0006
-0.555775	-1.94087
-0.385073	-1.80674
-0.357301	-1.37999
-0.328431	-1.87118
-0.258684	-1.99987
-0.499034	-2.11078
-0.141735	-1.82636
-0.41238	-1.83324
-0.440063	-2.09441
-0.687042	-2.10935
-0.0339794	-1.80768
-0.294472	-1.97427
-0.233432	-1.37157
-0.447628	-1.81625
-0.261765	-1.93107
-0.374141	-1.82793
-0.603822	-2.11748
-0.106153	-1.93654
-0.302163	-2.05277
-0.184376	-1.77392
-0.38855	-1.74062
-0.240027	-1.96002
-0.352848	-2.02974
-0.0679755	-1.89886
-0.0615339	-1.51601
-0.151133	-1.9436
-0.236913	-1.77792
-0.319845	-1.45995
-0.452008	-1.63424
-0.315675	-2.11583
-0.323321	-2.08214
-0.659792	-2.24947
-0.103452	-2.28558
-0.203304	-1.85589
-0.469041	-2.06309
-0.313462	-1.87877
-0.687767	-1.90086
-0.321671	-1.90333
-0.194454	-1.34584
-0.294875	-1.79615
-0.390145	-1.89371
-0.228265	-1.41698
-0.13083	-1.87532
-0.165473	-1.33629
-0.181948	-1.64934
-0.450501	-1.76171
-0.150886	-1.70053
-0.454209	-1.73203
-0.240516	-1.3864
-0.316545	-2.07575
-0.579655	-1.79496
-0.0846421	-1.95815
-0.495175	-1.89355
-0.312715	-1.61081
-0.666594	-2.46074
-0.233378	-2.01189
-0.184484	-1.91582
-0.599381	-2.12475
-0.409367	-1.98213
-0.426337	-1.69436
0.0333625	-1.83311
-0.771301	-2.90793
-0.221903	-1.98886
-0.589491	-1.82128
-0.344213	-1.80122
-0.253657	-1.67809
-0.555472	-2.08037
-0.446405	-2.23404
-0.409651	-2.07403
-0.522438	-2.05465
-0.375433	-1.82773
-0.875991	-2.35846
-0.193069	-1.75931
-0.105511	-1.91049
-0.16423	-1.50122
-0.262595	-1.95405
-0.474447	-2.35419
-0.0449009	-2.39804
-0.298309	-1.74287
-0.36766	-1.79992
-0.320315	-2.1601
-0.188538	-1.68908
-0.211108	-1.95831
-0.409518	-1.77059
-0.325975	-1.91017
-0.219668	-1.42825
-0.371717	-2.21129
-0.17096	-1.84733
-0.22666	-1.92854
-0.418955	-2.20755
-0.274826	-1.85099
-0.592525	-2.30675
-0.413806	-2.4303
-0.62475	-2.60163
-0.387566	-1.6243
-0.310045	-2.27276
-0.229727	-1.93398
-0.316416	-1.7524
-0.526262	-1.70331
-0.503166	-1.91354
-0.353666	-1.27855
-0.205072	-1.96191
-0.0815533	-1.7901
-0.123109	-1.31602
-0.226345	-2.03204
-0.599094	-2.26766
-0.105816	-1.85121
-0.0426495	-1.81859
-0.283193	-1.76353
-0.259775	-1.98394
-0.381471	-2.22807
-0.354839	-2.15344
-0.366283	-2.41179
-0.369858	-1.94172
-0.234263	-2.78032
-0.345176	-2.04221
-0.210534	-2.10086
-0.252564	-2.43822
-0.374879	-1.99645
-0.220531	-1.35931
-0.355793	-1.88137
-0.68252	-2.32353
-0.350556	-1.56065
-0.229755	-1.70819
-0.319445	-2.02782
-0.390723	-2.49347
-0.246043	-2.35892
-0.222444	-2.0002
-1.05233	-1.6791
-0.357629	-1.66993
-0.33598	-1.52524
-0.423339	-2.07048
-0.320471	-2.14437
-0.253502	-2.32204
-0.270555	-1.86688
-0.419193	-1.87224
-0.307546	-1.86876
-0.56028	-1.79025
-0.407211	-1.86123
-0.520073	-1.80169
-0.268711	-2.0615
-0.145026	-1.92733
-0.433984	-2.13493
-0.246871	-1.80313
-0.114625	-1.76693
-0.614576	-2.11414
-0.621788	-2.02483
-0.39112	-1.96189
-0.643545	-1.78304
-0.234668	-1.54628
-0.327726	-1.78756
-0.41004	-1.89877
-0.0033286	-2.29875
-0.300992	-1.73672
-0.392584	-1.96899
-0.389024	-1.91656
-0.240795	-2.22205
-0.368465	-1.78766
-0.530978	-1.84085
-0.490659	-2.05677
-0.507443	-1.38405
-0.440473	-2.45749
-0.663234	-1.63189
-0.415287	-1.84679
-0.239496	-2.22564
-0.513875	-2.32232
-0.455332	-2.23076
-0.647524	-1.94648
-0.226131	-1.61045
-0.246139	-1.62118
-0.419384	-1.99612
-0.156953	-1.42031
-0.746996	-1.63893
-0.495499	-2.04978
-0.601129	-2.32358
-0.0580251	-2.25689
-0.336751	-1.86806
-0.516884	-2.59029
-0.586562	-1.69262
-0.54452	-2.45943
-0.19324	-1.56638
-0.064214	-1.6807
-0.3733	-2.01226
-0.421361	-2.07489
-0.492121	-2.09179
-0.405106	-1.67835
0.0116093	-1.58996
-0.0778911	-1.80206
-0.131744	-2.08084
-0.321485	-2.14458
-0.561853	-1.40599
-0.335251	-1.56376
-0.17547	-1.87837
-0.194462	-2.06084
-0.316806	-2.19691
-0.171396	-1.58925
-0.0503329	-1.73475
-0.227942	-1.52929
-0.616445	-1.88035
-0.683722	-1.96157
-0.297085	-1.49437
-0.444921	-2.26808
-0.440464	-2.02851
-0.275866	-2.21156
-0.248242	-1.69213
-0.359003	-1.5912
-0.421015	-2.05877
-0.367458	-1.89929
-0.194862	-1.86237
-0.51937	-1.94198
-0.243875	-1.93569
-0.384166	-1.61874
-0.164423	-2.12765
-0.366896	-2.00686
-0.378816	-2.03603
-0.490616	-2.30042
-0.50794	-2.18134
-0.194403	-2.01227
-0.328185	-1.65707
-0.534417	-1.95031
-0.17851	-1.57983
-0.197296	-1.94245
0.0896959	-1.47583
-0.33591	-2.01353
-0.27347	-1.94738
-0.586962	-1.73255
-0.624549	-2.422
-0.163401	-1.96289
-0.274615	-1.93496
-0.386228	-1.92814
-0.195952	-1.3822
-0.387267	-2.55085
-0.345304	-1.4881
-0.849979	-1.94846
-0.433542	-2.06201
-0.719551	-2.08173
-0.233899	-1.57237
-0.547717	-2.21821
-0.3307	-1.54594
-0.401027	-2.26205
-0.896178	-2.39748
-0.548074	-1.88055
-0.272744	-2.19592
-0.343357	-2.19332
-0.0979469	-2.39109
-0.436785	-2.02021
-0.414722	-2.0018
-0.612642	-1.50497
-0.289944	-1.56906
-0.0834115	-1.27334
-0.245141	-1.50623
-0.328405	-1.85141
-0.519076	-1.96928
-0.15898	-2.76015
-0.510782	-2.20266
-0.195385	-2.22588
-0.557933	-1.73774
-0.613776	-2.29577
-0.657424	-2.30933
-0.362524	-2.01589
-0.423923	-1.9486
-0.169874	-2.3172
-0.402874	-1.96472
-0.549301	-2.23128
-0.46639	-1.49407
-0.22766	-1.65633
-0.798795	-1.80947
-0.450452	-1.51903
-0.331219	-1.83639
-0.321318	-1.75211
-0.117561	-1.4236
-0.20949	-2.07446
0.0121821	-2.19018
-0.410744	-1.93543
-0.743802	-1.96833
-0.473005	-1.80054
-0.431015	-2.04978
-0.439138	-1.92682
-0.598618	-2.02255
-0.659229	-2.14577
0.0139383	-1.34318
-0.142405	-1.64351
-0.655102	-1.40054
-0.240383	-1.70869
-0.110197	-2.04559
-0.866437	-2.16377
-0.586271	-1.71858
-0.293287	-1.98702
-0.246105	-1.59042
-0.20402	-1.43968
-0.360267	-1.83835
-0.607487	-1.8494
-0.352289	-1.88692
-0.207086	-1.46842
-0.0789676	-2.10199
-0.111239	-2.01138
-0.283386	-2.2397
-0.196774	-1.90705
-0.541917	-2.04117
-0.190109	-1.4948
-0.301911	-1.77621
-0.321651	-1.39891
-0.347241	-2.07535
-0.266748	-1.09609
-0.168888	-1.66644
-0.370181	-2.00987
-0.0323154	-1.79875
-0.25572	-1.56336
-0.404953	-1.7934
-0.598692	-2.06413
-0.138677	-1.95488
-0.201888	-2.50844
-0.616699	-2.15989
-0.718881	-1.9889
-0.555314	-1.88246
-0.507139	-1.36149
-0.360256	-1.70033
-0.191654	-1.86209
-0.264244	-2.08358
-0.317414	-1.88561
-0.212343	-1.33738
-0.142175	-2.09761
-0.700498	-2.11056
-0.187816	-1.84266
-0.27392	-2.20345
-0.210169	-1.89903
-0.406009	-1.91001
-0.215432	-1.99904
0.0350372	-1.66168
-0.394276	-2.20565
-0.600104	-1.81514
-0.714305	-1.99813
-0.260896	-2.03138
-0.510511	-2.35407
-0.282086	-1.36105
-0.343215	-1.97256
-0.333089	-1.66774
-0.407645	-1.68247
-0.0242299	-1.91385
-0.527315	-1.85658
-0.0657527	-2.33059
-0.268295	-1.44888
-0.379665	-1.74244
-0.322546	-1.93981
-0.399028	-1.87694
-0.43833	-1.88837
-0.488894	-1.83082
-0.608237	-1.3319
-0.412193	-1.77929
-0.362769	-1.74843
-0.144417	-1.60869
-0.545574	-2.20565
-0.388915	-1.89384
0.134676	-2.07427
-0.464667	-2.07762
-0.559806	-1.95148
-0.394134	-2.14615
-0.557723	-1.43316
-0.298545	-1.58246
-0.325992	-1.43252
-0.203935	-1.46278
-0.363397	-1.35387
-0.246886	-1.78854
-0.61205	-1.98752
-0.377165	-1.73586
-0.337818	-1.41133
-0.265069	-1.94943
0.263013	-1.40326
-0.23834	-2.0684
-0.25902	-2.08392
-0.304754	-1.81331
-0.958438	-1.54796
-0.482189	-2.06687
-0.230215	-2.10112
-0.30977	-1.86581
-0.185912	-2.23646
-0.238381	-1.70406
-0.804387	-2.44216
-0.342644	-2.34308
-0.0001323	-1.58284
-0.654025	-1.82486
-0.235345	-2.01042
-0.343121	-1.93754
-0.0386357	-1.80921
-0.451148	-2.09285
-0.402824	-2.02526
-0.686039	-2.10498
-0.56341	-2.21195
-0.257899	-1.92369
-0.196113	-1.79455
-0.323015	-2.1321
-0.211171	-1.60267
-0.272882	-2.08889
-0.241759	-1.9052
-0.452279	-1.86224
-0.778271	-1.76826
-0.13801	-2.12884
-0.553158	-1.87376
0.104588	-1.5218
-0.479074	-1.48112
-0.162151	-1.18344
-0.42521	-1.8588
-0.019706	-1.90268
-0.318606	-1.98652
-0.717179	-2.0318
-0.272631	-1.24349
-0.446592	-1.84208
-0.655178	-2.04492
-0.327487	-2.23006
-0.582069	-1.4872
-0.491221	-2.21848
-0.837958	-2.09574
-0.304337	-2.35028
-0.0380015	-1.41021
-0.143483	-1.78063
-0.499797	-1.52865
-0.791907	-2.06906
-0.477477	-1.70522
0.195936	-1.93812
-0.009717	-1.78856
-0.0836019	-2.5416
-0.326995	-1.36774
-0.245552	-2.249
-0.766743	-1.47819
-0.188409	-1.76008
-0.708523	-1.89296
-0.666063	-1.69207
-0.396577	-1.21107
-0.513454	-1.98497
-0.455885	-1.71883
-0.887202	-1.78429
-0.365979	-1.39449
-0.420386	-2.29414
-0.647109	-1.93016
-0.176646	-1.62251
-0.48243	-1.72917
-0.436487	-2.39313
-0.299818	-1.55549
-0.683558	-2.17368
-0.504921	-1.93427
-0.163465	-2.04116
-0.0862787	-1.84712
-0.147041	-1.39419
-0.398242	-2.18102
-0.331436	-1.31294
-0.270002	-1.89967
-0.322559	-1.93027
-0.670345	-1.91515
-0.57517	-1.87361
-0.0226886	-1.44768
-0.060634	-1.89318
-0.424092	-1.67267
-0.540802	-1.7689
-0.309877	-1.47982
-0.373649	-1.89784
-0.473235	-2.09422
-0.438399	-2.16409
-0.572787	-1.94836
-0.17297	-1.80497
-1.02987	-2.00054
-0.113902	-1.41591
-0.537101	-2.21284
-0.252352	-1.9781
-0.23025	-1.94125
-0.451373	-1.83505
-0.256651	-1.97703
-0.984784	-2.00136
-0.630401	-2.01533
-0.379872	-1.81569
-0.181236	-1.75777
-0.382883	-2.02641
-0.405848	-2.07228
-0.948405	-1.98947
-0.633924	-2.55959
-0.254498	-1.89447
-0.933555	-1.98165
-0.198479	-2.18536
-0.398215	-1.90139
-0.393761	-1.87291
-0.258411	-1.86462
-0.137991	-2.16448
-0.71504	-1.78917
-0.403014	-1.83157
-0.0998409	-0.420858
-0.208128	-2.07171
-0.170463	-1.79315
-0.514368	-2.07986
-0.36375	-1.93015
-0.642678	-1.84594
-0.233582	-1.80596
0.00160928	-1.84454
-0.153124	-2.34052
-0.430794	-2.48729
-0.211898	-1.96642
-0.167369	-1.50575
-0.323899	-1.77218
-0.394396	-1.75677
-0.525974	-1.62185
-0.341587	-1.91106
-0.236707	-1.8692
-0.242111	-1.83774
-0.2262	-1.82124
-0.153881	-1.25517
-0.580116	-1.91823
-0.053984	-2.00758
-0.601088	-2.19475
-0.066953	-1.84818
-0.417778	-1.843
-0.0773731	-1.74395
-0.243818	-2.08548
-0.281395	-1.79372
-0.196024	-1.81853
-0.325313	-2.08174
-0.293511	-1.89655
-0.0749844	-1.90835
-0.472447	-1.81311
-0.502784	-1.58517
-0.407321	-1.92425
-0.615296	-2.21428
-0.101593	-1.46709
-0.0763552	-1.36231
-0.348499	-1.62809
-0.237958	-2.62171
-0.186993	-1.62933
-0.398096	-1.93513
-0.487686	-2.03158
-0.419142	-2.07956
-0.200466	-1.9775
-0.359969	-1.55633
-0.0966766	-1.81178
-0.723204	-1.25411
-0.475345	-1.63784
-0.239306	-1.31669
-0.189195	-1.78632
-0.483013	-1.90907
-0.23459	-2.07696
-0.473029	-2.30302
-0.311021	-1.29982
-0.320917	-1.65889
-0.631949	-2.09746
-0.423305	-2.22533
-0.179025	-1.72578
-0.70733	-1.64792
-0.100853	-1.3382
-0.0842022	-1.76397

## Sheet: Figure 8B
	NES	NOM p-val
REACTOME_HDMS_DEMETHYLATE_HISTONES	1.55089	0.0325203
REACTOME_ACETYLCHOLINE_NEUROTRANSMITTER_RELEASE_CYCLE	1.51326	0.0383064
REACTOME_DOPAMINE_NEUROTRANSMITTER_RELEASE_CYCLE	1.48652	0.0613497
REACTOME_SEROTONIN_NEUROTRANSMITTER_RELEASE_CYCLE	1.46847	0.0709939
REACTOME_NOREPINEPHRINE_NEUROTRANSMITTER_RELEASE_CYCLE	1.44634	0.0762887
REACTOME_REGULATION_OF_MECP2_EXPRESSION_AND_ACTIVITY	1.39651	0.0695296
REACTOME_DNA_DOUBLE_STRAND_BREAK_RESPONSE	1.38606	0.0907258
REACTOME_METABOLISM_OF_AMINE_DERIVED_HORMONES	1.3665	0.0672098
REACTOME_REGULATION_OF_SIGNALING_BY_CBL	1.35852	0.09375
REACTOME_VOLTAGE_GATED_POTASSIUM_CHANNELS	1.34743	0.0872211
REACTOME_ESTROGEN_DEPENDENT_GENE_EXPRESSION	1.33914	0.0794297
REACTOME_NEUROTRANSMITTER_RELEASE_CYCLE	1.33579	0.124224
REACTOME_GABA_SYNTHESIS_RELEASE_REUPTAKE_AND_DEGRADATION	1.32678	0.166329
REACTOME_NEUREXINS_AND_NEUROLIGINS	1.30916	0.122244
BIOCARTA_LIS1_PATHWAY	1.29947	0.124498
REACTOME_MEIOTIC_RECOMBINATION	1.29819	0.164659
REACTOME_DEPURINATION	1.29726	0.163223
REACTOME_BASE_EXCISION_REPAIR_AP_SITE_FORMATION	1.28928	0.153689
REACTOME_SIRT1_NEGATIVELY_REGULATES_RRNA_EXPRESSION	1.28389	0.207661
PID_REELIN_PATHWAY	1.26085	0.147638
REACTOME_PRC2_METHYLATES_HISTONES_AND_DNA	1.26052	0.205339
REACTOME_NONHOMOLOGOUS_END_JOINING_NHEJ	1.25569	0.170732
REACTOME_CLASS_C_3_METABOTROPIC_GLUTAMATE_PHEROMONE_RECEPTORS	1.25387	0.211813
REACTOME_SURFACTANT_METABOLISM	1.24986	0.14405
REACTOME_HATS_ACETYLATE_HISTONES	1.24775	0.202
REACTOME_TBC_RABGAPS	1.24626	0.154
REACTOME_SYNTHESIS_OF_PIPS_AT_THE_EARLY_ENDOSOME_MEMBRANE	1.23877	0.220676
REACTOME_HDACS_DEACETYLATE_HISTONES	1.23246	0.208417
REACTOME_FRS_MEDIATED_FGFR4_SIGNALING	1.22279	0.137097
PID_NEPHRIN_NEPH1_PATHWAY	1.22133	0.196281
REACTOME_CHROMATIN_ORGANIZATION	1.22014	0.18
REACTOME_PHOSPHOLIPASE_C_MEDIATED_CASCADE_FGFR4	1.20661	0.198783
BIOCARTA_CHREBP_PATHWAY	1.20658	0.202405
REACTOME_FOXO_MEDIATED_TRANSCRIPTION_OF_CELL_DEATH_GENES	1.20169	0.179641
REACTOME_PHASE_0_RAPID_DEPOLARISATION	1.20106	0.201207
REACTOME_LISTERIA_MONOCYTOGENES_ENTRY_INTO_HOST_CELLS	1.20064	0.191321
REACTOME_RUNX1_REGULATES_GENES_INVOLVED_IN_MEGAKARYOCYTE_DIFFERENTIATION_AND_PLATELET_FUNCTION	1.19999	0.221074
REACTOME_SUMOYLATION_OF_TRANSCRIPTION_COFACTORS	1.19415	0.263366
REACTOME_INLB_MEDIATED_ENTRY_OF_LISTERIA_MONOCYTOGENES_INTO_HOST_CELL	1.19104	0.209709
REACTOME_OXIDATIVE_STRESS_INDUCED_SENESCENCE	1.18916	0.238956
REACTOME_NEGATIVE_REGULATION_OF_FGFR4_SIGNALING	1.18819	0.182004
BIOCARTA_CREB_PATHWAY	1.18696	0.241309
REACTOME_CARBOXYTERMINAL_POST_TRANSLATIONAL_MODIFICATIONS_OF_TUBULIN	1.18461	0.209877
REACTOME_FGFR2_LIGAND_BINDING_AND_ACTIVATION	1.18381	0.234694
BIOCARTA_CSK_PATHWAY	1.18351	0.221766
REACTOME_SIGNALING_BY_FGFR4	1.18342	0.168724
REACTOME_ACTIVATED_PKN1_STIMULATES_TRANSCRIPTION_OF_AR_ANDROGEN_RECEPTOR_REGULATED_GENES_KLK2_AND_KLK3	1.18329	0.290061
REACTOME_ERCC6_CSB_AND_EHMT2_G9A_POSITIVELY_REGULATE_RRNA_EXPRESSION	1.18153	0.281314
REACTOME_CONDENSATION_OF_PROPHASE_CHROMOSOMES	1.17595	0.280083
REACTOME_REGULATION_OF_BETA_CELL_DEVELOPMENT	1.16742	0.153535
REACTOME_MEIOSIS	1.16559	0.264646
REACTOME_SIGNALING_BY_FGFR2	1.16255	0.18835
REACTOME_FRS_MEDIATED_FGFR1_SIGNALING	1.1581	0.228682
REACTOME_ACTIVATION_OF_HOX_GENES_DURING_DIFFERENTIATION	1.15676	0.251534
REACTOME_NEURONAL_SYSTEM	1.15665	0.207039
REACTOME_SIGNALING_BY_NOTCH1	1.15518	0.160752
REACTOME_BBSOME_MEDIATED_CARGO_TARGETING_TO_CILIUM	1.15431	0.284872
REACTOME_DNA_METHYLATION	1.15188	0.32438
REACTOME_PKMTS_METHYLATE_HISTONE_LYSINES	1.15155	0.252049
REACTOME_RAF_ACTIVATION	1.15039	0.261477
PID_ERA_GENOMIC_PATHWAY	1.14866	0.153361
REACTOME_TRANSMISSION_ACROSS_CHEMICAL_SYNAPSES	1.14694	0.216495
REACTOME_NOTCH_HLH_TRANSCRIPTION_PATHWAY	1.14604	0.253012
BIOCARTA_NGF_PATHWAY	1.14556	0.299163
REACTOME_RUNX1_INTERACTS_WITH_CO_FACTORS_WHOSE_PRECISE_EFFECT_ON_RUNX1_TARGETS_IS_NOT_KNOWN	1.14454	0.278788
REACTOME_NEGATIVE_REGULATION_OF_FGFR2_SIGNALING	1.14313	0.23622
REACTOME_NEGATIVE_REGULATION_OF_FGFR1_SIGNALING	1.14297	0.207921
REACTOME_LONG_TERM_POTENTIATION	1.1419	0.259336
REACTOME_FRS_MEDIATED_FGFR2_SIGNALING	1.14011	0.242063
REACTOME_AMYLOID_FIBER_FORMATION	1.13375	0.260274
REACTOME_POTASSIUM_CHANNELS	1.13262	0.220441
KEGG_TYPE_II_DIABETES_MELLITUS	1.12965	0.210526
REACTOME_ESR_MEDIATED_SIGNALING	1.12913	0.179435
REACTOME_REPRODUCTION	1.12607	0.277445
REACTOME_SIGNALING_BY_FGFR1	1.12378	0.237425
BIOCARTA_CARM_ER_PATHWAY	1.12325	0.29249
REACTOME_SIGNALING_BY_NOTCH1_IN_CANCER	1.12143	0.209677
REACTOME_FANCONI_ANEMIA_PATHWAY	1.11803	0.353877
REACTOME_MEIOTIC_SYNAPSIS	1.11787	0.3125
REACTOME_ACTIVATION_OF_NMDA_RECEPTORS_AND_POSTSYNAPTIC_EVENTS	1.11612	0.271784
REACTOME_SIGNALING_BY_MODERATE_KINASE_ACTIVITY_BRAF_MUTANTS	1.11596	0.279261
REACTOME_SUMOYLATION_OF_DNA_METHYLATION_PROTEINS	1.11489	0.284294
REACTOME_SPRY_REGULATION_OF_FGF_SIGNALING	1.114	0.311155
BIOCARTA_INSULIN_PATHWAY	1.10911	0.334719
REACTOME_DISASSEMBLY_OF_THE_DESTRUCTION_COMPLEX_AND_RECRUITMENT_OF_AXIN_TO_THE_MEMBRANE	1.1087	0.293279
REACTOME_DOWNSTREAM_SIGNALING_OF_ACTIVATED_FGFR1	1.1076	0.280318
PID_LIS1_PATHWAY	1.10716	0.296593
REACTOME_CRMPS_IN_SEMA3A_SIGNALING	1.10712	0.369919
REACTOME_GLUTAMATE_BINDING_ACTIVATION_OF_AMPA_RECEPTORS_AND_SYNAPTIC_PLASTICITY	1.10579	0.312115
REACTOME_AMINE_LIGAND_BINDING_RECEPTORS	1.09907	0.26501
REACTOME_PROTEIN_PROTEIN_INTERACTIONS_AT_SYNAPSES	1.0989	0.294715
REACTOME_SIGNALING_BY_FGFR	1.09683	0.267068
REACTOME_PHOSPHOLIPASE_C_MEDIATED_CASCADE_FGFR2	1.09359	0.315895
REACTOME_GLUTAMATE_NEUROTRANSMITTER_RELEASE_CYCLE	1.09291	0.338115
KEGG_REGULATION_OF_AUTOPHAGY	1.0927	0.310891
REACTOME_DOWNSTREAM_SIGNALING_OF_ACTIVATED_FGFR4	1.08867	0.298174
REACTOME_ACTIVATED_NOTCH1_TRANSMITS_SIGNAL_TO_THE_NUCLEUS	1.08524	0.329293
REACTOME_DNA_DAMAGE_TELOMERE_STRESS_INDUCED_SENESCENCE	1.08103	0.37251
REACTOME_PRE_NOTCH_EXPRESSION_AND_PROCESSING	1.07872	0.325253
REACTOME_IRS_MEDIATED_SIGNALLING	1.0718	0.331992
KEGG_SELENOAMINO_ACID_METABOLISM	1.06595	0.339431
KEGG_NOTCH_SIGNALING_PATHWAY	1.06452	0.348515
BIOCARTA_PDZS_PATHWAY	1.06004	0.403766
REACTOME_FORMATION_OF_THE_BETA_CATENIN:TCF_TRANSACTIVATING_COMPLEX	1.05876	0.403259
REACTOME_BASE_EXCISION_REPAIR	1.05849	0.411417
REACTOME_UPTAKE_AND_ACTIONS_OF_BACTERIAL_TOXINS	1.05324	0.392276
REACTOME_SIGNALING_BY_FGFR3	1.05262	0.346856
KEGG_MATURITY_ONSET_DIABETES_OF_THE_YOUNG	1.05252	0.35503
REACTOME_MAP2K_AND_MAPK_ACTIVATION	1.05127	0.412475
REACTOME_DOWNSTREAM_SIGNALING_OF_ACTIVATED_FGFR2	1.04955	0.343874
BIOCARTA_CTLA4_PATHWAY	1.04881	0.420619
REACTOME_PI_3K_CASCADE:FGFR4	1.04823	0.372951
BIOCARTA_TPO_PATHWAY	1.04764	0.384298
REACTOME_RAS_ACTIVATION_UPON_CA2PLUS_INFLUX_THROUGH_NMDA_RECEPTOR	1.04605	0.376033
REACTOME_NEUROTRANSMITTER_RECEPTORS_AND_POSTSYNAPTIC_SIGNAL_TRANSMISSION	1.04407	0.349896
BIOCARTA_IL2_PATHWAY	1.04247	0.427673
REACTOME_HSF1_ACTIVATION	1.0414	0.399614
REACTOME_RECYCLING_OF_BILE_ACIDS_AND_SALTS	1.03944	0.390099
REACTOME_SIGNALING_BY_NODAL	1.03866	0.392233
REACTOME_ASSEMBLY_AND_CELL_SURFACE_PRESENTATION_OF_NMDA_RECEPTORS	1.03807	0.401222
REACTOME_NEGATIVE_REGULATION_OF_FGFR3_SIGNALING	1.03604	0.385069
REACTOME_CENTROSOME_MATURATION	1.03556	0.457906
REACTOME_NUCLEOSOME_ASSEMBLY	1.03449	0.455253
REACTOME_GRB2:SOS_PROVIDES_LINKAGE_TO_MAPK_SIGNALING_FOR_INTEGRINS	1.03056	0.422846
REACTOME_RORA_ACTIVATES_GENE_EXPRESSION	1.02902	0.451219
REACTOME_SIGNALING_BY_RAS_MUTANTS	1.02765	0.405738
KEGG_RIBOSOME	1.02489	0.531496
REACTOME_FGFR1_LIGAND_BINDING_AND_ACTIVATION	1.02477	0.41358
REACTOME_ADRENALINE_NORADRENALINE_INHIBITS_INSULIN_SECRETION	1.0241	0.40501
REACTOME_NONSENSE_MEDIATED_DECAY_NMD	1.02171	0.470472
REACTOME_METALLOPROTEASE_DUBS	1.0216	0.442495
REACTOME_CTLA4_INHIBITORY_SIGNALING	1.02159	0.460446
REACTOME_PROCESSING_OF_DNA_DOUBLE_STRAND_BREAK_ENDS	1.01397	0.454724
PID_DNA_PK_PATHWAY	1.01277	0.439922
REACTOME_RMTS_METHYLATE_HISTONE_ARGININES	1.01008	0.445759
REACTOME_NONSENSE_MEDIATED_DECAY_NMD_INDEPENDENT_OF_THE_EXON_JUNCTION_COMPLEX_EJC	1.00522	0.529183
PID_EPHRINB_REV_PATHWAY	1.00519	0.459959
REACTOME_DNA_DOUBLE_STRAND_BREAK_REPAIR	1.00457	0.451677
REACTOME_TRANSCRIPTIONAL_REGULATION_OF_GRANULOPOIESIS	1.00316	0.436105
REACTOME_SIGNALING_BY_NUCLEAR_RECEPTORS	1.00147	0.426
REACTOME_REGULATION_OF_GENE_EXPRESSION_IN_BETA_CELLS	1.00075	0.456914
REACTOME_ANCHORING_OF_THE_BASAL_BODY_TO_THE_PLASMA_MEMBRANE	0.99939	0.462475
REACTOME_SENESCENCE_ASSOCIATED_SECRETORY_PHENOTYPE_SASP	0.994831	0.470588
REACTOME_NOTCH2_ACTIVATION_AND_TRANSMISSION_OF_SIGNAL_TO_THE_NUCLEUS	0.994562	0.463366
REACTOME_INSULIN_RECEPTOR_SIGNALLING_CASCADE	0.993592	0.438632
REACTOME_NOTCH1_INTRACELLULAR_DOMAIN_REGULATES_TRANSCRIPTION	0.993451	0.479424
REACTOME_NEGATIVE_REGULATION_OF_MAPK_PATHWAY	0.993095	0.501014
REACTOME_RECRUITMENT_OF_NUMA_TO_MITOTIC_CENTROSOMES	0.992605	0.483471
REACTOME_AURKA_ACTIVATION_BY_TPX2	0.99055	0.504032
REACTOME_FRS_MEDIATED_FGFR3_SIGNALING	0.990072	0.456212
REACTOME_BETA_CATENIN_PHOSPHORYLATION_CASCADE	0.988973	0.4846
KEGG_TASTE_TRANSDUCTION	0.988923	0.47619
REACTOME_CILIUM_ASSEMBLY	0.987429	0.450199
REACTOME_G2_M_DNA_DAMAGE_CHECKPOINT	0.985947	0.493097
REACTOME_NEGATIVE_REGULATION_OF_NMDA_RECEPTOR_MEDIATED_NEURONAL_TRANSMISSION	0.985859	0.464583
BIOCARTA_BARRESTIN_SRC_PATHWAY	0.985665	0.498952
REACTOME_TRANSLESION_SYNTHESIS_BY_POLK	0.985571	0.508982
REACTOME_TRANSCRIPTIONAL_REGULATION_BY_MECP2	0.985126	0.477124
BIOCARTA_GH_PATHWAY	0.984715	0.481799
KEGG_ALDOSTERONE_REGULATED_SODIUM_REABSORPTION	0.982222	0.501027
PID_EPHA_FWDPATHWAY	0.980216	0.506148
REACTOME_SIGNALING_BY_FGFR_IN_DISEASE	0.979476	0.477912
REACTOME_PI_3K_CASCADE:FGFR2	0.972809	0.470348
REACTOME_PI_3K_CASCADE:FGFR1	0.971697	0.488844
REACTOME_TELOMERE_MAINTENANCE	0.970209	0.5
REACTOME_SIGNALING_BY_NOTCH2	0.968384	0.528958
REACTOME_INSULIN_PROCESSING	0.964511	0.541152
REACTOME_TRANSLOCATION_OF_ZAP_70_TO_IMMUNOLOGICAL_SYNAPSE	0.963523	0.528
REACTOME_EPIGENETIC_REGULATION_OF_GENE_EXPRESSION	0.962847	0.508911
REACTOME_RHO_GTPASES_ACTIVATE_PKNS	0.962711	0.494071
PID_HDAC_CLASSII_PATHWAY	0.962595	0.526104
KEGG_ENDOMETRIAL_CANCER	0.961985	0.488934
REACTOME_GLUCAGON_LIKE_PEPTIDE_1_GLP1_REGULATES_INSULIN_SECRETION	0.961966	0.517598
REACTOME_SIGNALING_BY_ERYTHROPOIETIN	0.961459	0.536534
REACTOME_RNA_POLYMERASE_I_TRANSCRIPTION	0.960958	0.502008
REACTOME_SIGNALING_BY_BRAF_AND_RAF_FUSIONS	0.960813	0.513347
KEGG_ERBB_SIGNALING_PATHWAY	0.959851	0.562372
REACTOME_POSITIVE_EPIGENETIC_REGULATION_OF_RRNA_EXPRESSION	0.959615	0.52
REACTOME_SYNAPTIC_ADHESION_LIKE_MOLECULES	0.95912	0.49076
REACTOME_INOSITOL_PHOSPHATE_METABOLISM	0.959005	0.540755
BIOCARTA_CK1_PATHWAY	0.958961	0.512097
REACTOME_PKA_ACTIVATION_IN_GLUCAGON_SIGNALLING	0.95706	0.534413
REACTOME_INTERLEUKIN_3_INTERLEUKIN_5_AND_GM_CSF_SIGNALING	0.956873	0.494845
REACTOME_GLUCAGON_TYPE_LIGAND_RECEPTORS	0.956648	0.525896
PID_REG_GR_PATHWAY	0.955372	0.56338
REACTOME_ATTENUATION_PHASE	0.95535	0.510436
KEGG_GLYCOSYLPHOSPHATIDYLINOSITOL_GPI_ANCHOR_BIOSYNTHESIS	0.955314	0.51751
REACTOME_INTERACTION_BETWEEN_L1_AND_ANKYRINS	0.954751	0.53112
REACTOME_HOMOLOGY_DIRECTED_REPAIR	0.953333	0.537402
KEGG_DORSO_VENTRAL_AXIS_FORMATION	0.952656	0.520309
REACTOME_UNBLOCKING_OF_NMDA_RECEPTORS_GLUTAMATE_BINDING_AND_ACTIVATION	0.952561	0.533333
REACTOME_RET_SIGNALING	0.952467	0.531187
PID_HNF3B_PATHWAY	0.952032	0.533605
REACTOME_PKA_MEDIATED_PHOSPHORYLATION_OF_CREB	0.95175	0.546584
REACTOME_BUDDING_AND_MATURATION_OF_HIV_VIRION	0.950829	0.510516
BIOCARTA_EPO_PATHWAY	0.950101	0.544086
BIOCARTA_AMAN_PATHWAY	0.949081	0.513672
REACTOME_DOWNREGULATION_OF_SMAD2_3:SMAD4_TRANSCRIPTIONAL_ACTIVITY	0.948214	0.537718
KEGG_MTOR_SIGNALING_PATHWAY	0.945716	0.56785
REACTOME_INTEGRATION_OF_ENERGY_METABOLISM	0.945382	0.584906
REACTOME_SUMOYLATION_OF_CHROMATIN_ORGANIZATION_PROTEINS	0.943539	0.531621
REACTOME_ONCOGENIC_MAPK_SIGNALING	0.942532	0.572301
REACTOME_RAB_REGULATION_OF_TRAFFICKING	0.942343	0.583004
REACTOME_TRANSCRIPTIONAL_REGULATION_BY_E2F6	0.941928	0.527383
REACTOME_REGULATION_OF_PLK1_ACTIVITY_AT_G2_M_TRANSITION	0.941374	0.557087
REACTOME_NEGATIVE_EPIGENETIC_REGULATION_OF_RRNA_EXPRESSION	0.939118	0.531621
REACTOME_DEADENYLATION_OF_MRNA	0.938793	0.546809
REACTOME_SIGNALING_BY_CYTOSOLIC_FGFR1_FUSION_MUTANTS	0.936842	0.555785
REACTOME_CARGO_TRAFFICKING_TO_THE_PERICILIARY_MEMBRANE	0.93602	0.526946
REACTOME_GENE_SILENCING_BY_RNA	0.934341	0.530534
BIOCARTA_IL7_PATHWAY	0.929833	0.564854
REACTOME_CREB1_PHOSPHORYLATION_THROUGH_NMDA_RECEPTOR_MEDIATED_ACTIVATION_OF_RAS_SIGNALING	0.929454	0.587755
REACTOME_PHASE_2_PLATEAU_PHASE	0.928143	0.552941
BIOCARTA_GLEEVEC_PATHWAY	0.927022	0.586066
REACTOME_DIGESTION_AND_ABSORPTION	0.925455	0.539499
REACTOME_SIGNALING_BY_FGFR2_IN_DISEASE	0.92447	0.5625
REACTOME_REGULATION_OF_INSULIN_SECRETION	0.924029	0.582121
REACTOME_REGULATION_OF_TP53_ACTIVITY_THROUGH_PHOSPHORYLATION	0.923958	0.556405
KEGG_COLORECTAL_CANCER	0.923382	0.59879
REACTOME_SIGNALING_BY_FGFR1_IN_DISEASE	0.922978	0.562633
REACTOME_CELLULAR_SENESCENCE	0.921178	0.590631
REACTOME_NCAM_SIGNALING_FOR_NEURITE_OUT_GROWTH	0.920375	0.616142
REACTOME_SIGNALING_BY_NTRK1_TRKA	0.918875	0.578313
REACTOME_KINESINS	0.918637	0.572581
REACTOME_FOXO_MEDIATED_TRANSCRIPTION	0.915791	0.681909
PID_MAPK_TRK_PATHWAY	0.913878	0.598377
REACTOME_RESOLUTION_OF_D_LOOP_STRUCTURES	0.909767	0.576172
REACTOME_PLATELET_AGGREGATION_PLUG_FORMATION	0.904811	0.592814
REACTOME_DOWNSTREAM_SIGNALING_OF_ACTIVATED_FGFR3	0.902648	0.633065
SIG_CD40PATHWAYMAP	0.902584	0.629555
REACTOME_E3_UBIQUITIN_LIGASES_UBIQUITINATE_TARGET_PROTEINS	0.901377	0.588694
REACTOME_TRANSCRIPTIONAL_REGULATION_BY_SMALL_RNAS	0.901177	0.571429
PID_AR_TF_PATHWAY	0.900427	0.618182
REACTOME_PI_METABOLISM	0.900403	0.614583
BIOCARTA_STATHMIN_PATHWAY	0.899989	0.604
REACTOME_EUKARYOTIC_TRANSLATION_INITIATION	0.897536	0.615686
REACTOME_FOXO_MEDIATED_TRANSCRIPTION_OF_CELL_CYCLE_GENES	0.894542	0.599606
KEGG_BIOSYNTHESIS_OF_UNSATURATED_FATTY_ACIDS	0.893455	0.664557
REACTOME_INTEGRIN_SIGNALING	0.892068	0.616162
REACTOME_HSF1_DEPENDENT_TRANSACTIVATION	0.891799	0.675624
REACTOME_MITOTIC_PROPHASE	0.891249	0.617476
REACTOME_SIGNALING_BY_TYPE_1_INSULIN_LIKE_GROWTH_FACTOR_1_RECEPTOR_IGF1R	0.890574	0.636
REACTOME_SIGNALING_BY_INSULIN_RECEPTOR	0.889796	0.706721
PID_PDGFRA_PATHWAY	0.888481	0.686992
REACTOME_SIGNALING_BY_NTRK2_TRKB	0.88776	0.62
BIOCARTA_MPR_PATHWAY	0.886077	0.623742
REACTOME_RAP1_SIGNALLING	0.883219	0.643145
REACTOME_MECP2_REGULATES_NEURONAL_RECEPTORS_AND_CHANNELS	0.882923	0.667351
REACTOME_RNA_POLYMERASE_I_PROMOTER_ESCAPE	0.881405	0.601562
REACTOME_ORGANELLE_BIOGENESIS_AND_MAINTENANCE	0.878234	0.604
REACTOME_CA_DEPENDENT_EVENTS	0.877006	0.643299
REACTOME_TRANSPORT_OF_INORGANIC_CATIONS_ANIONS_AND_AMINO_ACIDS_OLIGOPEPTIDES	0.875125	0.737052
REACTOME_DAG_AND_IP3_SIGNALING	0.874701	0.667368
REACTOME_DECTIN_2_FAMILY	0.87397	0.709419
REACTOME_CLASS_B_2_SECRETIN_FAMILY_RECEPTORS	0.873736	0.772374
REACTOME_SIGNALING_BY_NTRKS	0.871036	0.689873
PID_WNT_CANONICAL_PATHWAY	0.87007	0.709746
REACTOME_SHC_MEDIATED_CASCADE:FGFR4	0.869612	0.782961
REACTOME_INFLUENZA_INFECTION	0.869603	0.61165
PID_CONE_PATHWAY	0.867838	0.701461
KEGG_INSULIN_SIGNALING_PATHWAY	0.865848	0.739394
REACTOME_INTRA_GOLGI_TRAFFIC	0.864646	0.655936
REACTOME_SYNTHESIS_OF_GLYCOSYLPHOSPHATIDYLINOSITOL_GPI	0.863281	0.666012
KEGG_NON_SMALL_CELL_LUNG_CANCER	0.860922	0.743158
BIOCARTA_IGF1_PATHWAY	0.860451	0.669439
REACTOME_DEFECTIVE_GALNT3_CAUSES_FAMILIAL_HYPERPHOSPHATEMIC_TUMORAL_CALCINOSIS_HFTC	0.860316	0.680328
REACTOME_FGFR1_MUTANT_RECEPTOR_ACTIVATION	0.857283	0.644211
REACTOME_CONSTITUTIVE_SIGNALING_BY_AKT1_E17K_IN_CANCER	0.856615	0.723711
REACTOME_MAPK_TARGETS_NUCLEAR_EVENTS_MEDIATED_BY_MAP_KINASES	0.856418	0.66242
REACTOME_REGULATION_OF_TP53_ACTIVITY_THROUGH_ACETYLATION	0.855732	0.666667
REACTOME_SPHINGOLIPID_DE_NOVO_BIOSYNTHESIS	0.855452	0.733068
KEGG_GLYCINE_SERINE_AND_THREONINE_METABOLISM	0.85445	0.675781
REACTOME_SHC_MEDIATED_CASCADE:FGFR1	0.852527	0.779324
REACTOME_MITOTIC_PROMETAPHASE	0.852257	0.641129
BIOCARTA_NO2IL12_PATHWAY	0.851251	0.657948
BIOCARTA_WNT_PATHWAY	0.849949	0.662055
REACTOME_AMINO_ACID_TRANSPORT_ACROSS_THE_PLASMA_MEMBRANE	0.848249	0.777542
REACTOME_CHROMOSOME_MAINTENANCE	0.848192	0.636008
REACTOME_SHC_MEDIATED_CASCADE:FGFR2	0.846893	0.765914
REACTOME_ASSEMBLY_OF_THE_HIV_VIRION	0.844551	0.704062
BIOCARTA_PPARA_PATHWAY	0.843059	0.751012
REACTOME_ENDOSOMAL_SORTING_COMPLEX_REQUIRED_FOR_TRANSPORT_ESCRT	0.842895	0.682927
REACTOME_SELENOAMINO_ACID_METABOLISM	0.842815	0.662722
REACTOME_TRANSCRIPTIONAL_ACTIVITY_OF_SMAD2_SMAD3:SMAD4_HETEROTRIMER	0.8428	0.730315
KEGG_NEUROACTIVE_LIGAND_RECEPTOR_INTERACTION	0.836742	0.808732
REACTOME_RESOLUTION_OF_D_LOOP_STRUCTURES_THROUGH_SYNTHESIS_DEPENDENT_STRAND_ANNEALING_SDSA	0.835974	0.660079
BIOCARTA_PDGF_PATHWAY	0.83445	0.775051
PID_RETINOIC_ACID_PATHWAY	0.834059	0.779048
REACTOME_FOXO_MEDIATED_TRANSCRIPTION_OF_OXIDATIVE_STRESS_METABOLIC_AND_NEURONAL_GENES	0.833878	0.858847
PID_LPA4_PATHWAY	0.83252	0.653144
REACTOME_E2F_MEDIATED_REGULATION_OF_DNA_REPLICATION	0.830523	0.671875
REACTOME_TRANSCRIPTIONAL_REGULATION_OF_WHITE_ADIPOCYTE_DIFFERENTIATION	0.829975	0.788845
REACTOME_CARDIAC_CONDUCTION	0.829358	0.86747
REACTOME_SYNTHESIS_OF_PIPS_AT_THE_PLASMA_MEMBRANE	0.828281	0.745303
REACTOME_DEACTIVATION_OF_THE_BETA_CATENIN_TRANSACTIVATING_COMPLEX	0.827561	0.893701
REACTOME_RHO_GTPASE_EFFECTORS	0.827414	0.798
KEGG_GNRH_SIGNALING_PATHWAY	0.827098	0.776876
BIOCARTA_NOS1_PATHWAY	0.82577	0.72379
REACTOME_LYSOSOME_VESICLE_BIOGENESIS	0.825048	0.750503
REACTOME_ONCOGENE_INDUCED_SENESCENCE	0.824423	0.813861
BIOCARTA_BAD_PATHWAY	0.823469	0.745223
SIG_IL4RECEPTOR_IN_B_LYPHOCYTES	0.82222	0.731076
PID_IL2_1PATHWAY	0.822196	0.829365
REACTOME_PHOSPHORYLATION_OF_CD3_AND_TCR_ZETA_CHAINS	0.819939	0.715706
KEGG_HOMOLOGOUS_RECOMBINATION	0.819727	0.690522
REACTOME_SIGNALING_BY_RHO_GTPASES	0.818995	0.918164
REACTOME_CELLULAR_HEXOSE_TRANSPORT	0.816529	0.775758
REACTOME_REGULATION_OF_RUNX1_EXPRESSION_AND_ACTIVITY	0.815928	0.749487
REACTOME_TP53_REGULATES_TRANSCRIPTION_OF_GENES_INVOLVED_IN_CYTOCHROME_C_RELEASE	0.81519	0.830677
KEGG_VASOPRESSIN_REGULATED_WATER_REABSORPTION	0.814208	0.810651
KEGG_PROGESTERONE_MEDIATED_OOCYTE_MATURATION	0.812684	0.84435
REACTOME_TERMINATION_OF_O_GLYCAN_BIOSYNTHESIS	0.812015	0.765432
REACTOME_TIGHT_JUNCTION_INTERACTIONS	0.811724	0.764151
PID_PI3K_PLC_TRK_PATHWAY	0.811496	0.721519
REACTOME_REGULATION_OF_TP53_ACTIVITY	0.805979	0.726027
REACTOME_KERATINIZATION	0.804395	0.781925
PID_NOTCH_PATHWAY	0.803083	0.879837
PID_IFNG_PATHWAY	0.800868	0.808081
REACTOME_FGFR2_MUTANT_RECEPTOR_ACTIVATION	0.800307	0.742857
REACTOME_REGULATION_OF_CHOLESTEROL_BIOSYNTHESIS_BY_SREBP_SREBF	0.799703	0.743083
REACTOME_RAB_GEFS_EXCHANGE_GTP_FOR_GDP_ON_RABS	0.799569	0.892578
REACTOME_PROTEIN_UBIQUITINATION	0.799406	0.734496
REACTOME_DNA_REPAIR	0.797953	0.71173
REACTOME_PD_1_SIGNALING	0.794888	0.742972
KEGG_SYSTEMIC_LUPUS_ERYTHEMATOSUS	0.794073	0.769674
REACTOME_ACTIVATION_OF_THE_MRNA_UPON_BINDING_OF_THE_CAP_BINDING_COMPLEX_AND_EIFS_AND_SUBSEQUENT_BINDING_TO_43S	0.792664	0.722892
REACTOME_GLUCAGON_SIGNALING_IN_METABOLIC_REGULATION	0.790321	0.824597
REACTOME_TRANSCRIPTION_OF_THE_HIV_GENOME	0.789092	0.689981
REACTOME_BLOOD_GROUP_SYSTEMS_BIOSYNTHESIS	0.788699	0.773279
REACTOME_TRAFFICKING_OF_GLUR2_CONTAINING_AMPA_RECEPTORS	0.788013	0.745902
REACTOME_INTRAFLAGELLAR_TRANSPORT	0.785038	0.779961
REACTOME_P130CAS_LINKAGE_TO_MAPK_SIGNALING_FOR_INTEGRINS	0.783888	0.779727
REACTOME_SIGNALLING_TO_ERKS	0.783049	0.875244
REACTOME_SIGNALING_BY_WNT_IN_CANCER	0.782873	0.877895
REACTOME_GENERATION_OF_SECOND_MESSENGER_MOLECULES	0.780402	0.87751
PID_GMCSF_PATHWAY	0.778659	0.886228
BIOCARTA_BIOPEPTIDES_PATHWAY	0.778354	0.877847
BIOCARTA_MCM_PATHWAY	0.774809	0.707171
REACTOME_PEPTIDE_HORMONE_METABOLISM	0.773234	0.899598
PID_ERBB1_INTERNALIZATION_PATHWAY	0.772934	0.826884
REACTOME_INCRETIN_SYNTHESIS_SECRETION_AND_INACTIVATION	0.77283	0.888446
BIOCARTA_IGF1R_PATHWAY	0.771487	0.815195
REACTOME_CHAPERONE_MEDIATED_AUTOPHAGY	0.770946	0.808594
REACTOME_CARGO_RECOGNITION_FOR_CLATHRIN_MEDIATED_ENDOCYTOSIS	0.769627	0.914343
PID_FANCONI_PATHWAY	0.763598	0.728516
REACTOME_CLASS_I_PEROXISOMAL_MEMBRANE_PROTEIN_IMPORT	0.763326	0.812749
REACTOME_RNA_POLYMERASE_II_PRE_TRANSCRIPTION_EVENTS	0.762954	0.70778
SA_TRKA_RECEPTOR	0.762792	0.834951
KEGG_ACUTE_MYELOID_LEUKEMIA	0.76262	0.964844
KEGG_GLYCOSPHINGOLIPID_BIOSYNTHESIS_LACTO_AND_NEOLACTO_SERIES	0.759505	0.874743
BIOCARTA_HDAC_PATHWAY	0.759472	0.836327
REACTOME_FATTY_ACIDS	0.7591	0.810379
REACTOME_PHOSPHORYLATION_SITE_MUTANTS_OF_CTNNB1_ARE_NOT_TARGETED_TO_THE_PROTEASOME_BY_THE_DESTRUCTION_COMPLEX	0.758659	0.810101
BIOCARTA_EGF_PATHWAY	0.758375	0.891837
REACTOME_SUMOYLATION	0.755104	0.819444
REACTOME_DEFECTIVE_C1GALT1C1_CAUSES_TN_POLYAGGLUTINATION_SYNDROME_TNPS	0.754148	0.87169
REACTOME_PI_3K_CASCADE:FGFR3	0.754102	0.817427
REACTOME_SRP_DEPENDENT_COTRANSLATIONAL_PROTEIN_TARGETING_TO_MEMBRANE	0.751397	0.751984
REACTOME_CD209_DC_SIGN_SIGNALING	0.751307	0.895062
BIOCARTA_MET_PATHWAY	0.750337	0.879098
REACTOME_AUTOPHAGY	0.749321	0.896617
REACTOME_ROS_AND_RNS_PRODUCTION_IN_PHAGOCYTES	0.748123	0.904762
REACTOME_HIV_ELONGATION_ARREST_AND_RECOVERY	0.747361	0.768482
PID_PI3KCI_AKT_PATHWAY	0.746357	0.885081
REACTOME_INTERLEUKIN_7_SIGNALING	0.74443	0.956879
SIG_PIP3_SIGNALING_IN_CARDIAC_MYOCTES	0.743359	0.877551
REACTOME_AQUAPORIN_MEDIATED_TRANSPORT	0.742968	0.935872
REACTOME_ABORTIVE_ELONGATION_OF_HIV_1_TRANSCRIPT_IN_THE_ABSENCE_OF_TAT	0.742433	0.718045
REACTOME_INFECTIOUS_DISEASE	0.741267	0.860113
BIOCARTA_RAS_PATHWAY	0.740398	0.822176
REACTOME_ION_TRANSPORT_BY_P_TYPE_ATPASES	0.737666	0.968566
PID_SMAD2_3PATHWAY	0.737404	0.817635
REACTOME_TP53_REGULATES_TRANSCRIPTION_OF_DNA_REPAIR_GENES	0.733477	0.806641
KEGG_BASAL_TRANSCRIPTION_FACTORS	0.731033	0.814176
PID_P38_ALPHA_BETA_PATHWAY	0.728999	0.84879
REACTOME_METABOLIC_DISORDERS_OF_BIOLOGICAL_OXIDATION_ENZYMES	0.728759	0.883768
REACTOME_FORMATION_OF_THE_CORNIFIED_ENVELOPE	0.726953	0.918129
REACTOME_REGULATION_OF_TP53_ACTIVITY_THROUGH_METHYLATION	0.726143	0.858
PID_ATM_PATHWAY	0.724256	0.776908
REACTOME_TRANSCRIPTIONAL_REGULATION_BY_RUNX1	0.721692	0.948718
PID_ERBB2_ERBB3_PATHWAY	0.718441	0.900826
PID_BETA_CATENIN_DEG_PATHWAY	0.71674	0.954639
BIOCARTA_TGFB_PATHWAY	0.715791	0.901575
REACTOME_SYNTHESIS_OF_LEUKOTRIENES_LT_AND_EOXINS_EX	0.712807	0.903886
REACTOME_NOTCH3_ACTIVATION_AND_TRANSMISSION_OF_SIGNAL_TO_THE_NUCLEUS	0.709721	0.893701
REACTOME_RETROGRADE_TRANSPORT_AT_THE_TRANS_GOLGI_NETWORK	0.709369	0.8577
REACTOME_HDR_THROUGH_SINGLE_STRAND_ANNEALING_SSA	0.704839	0.779297
REACTOME_MACROAUTOPHAGY	0.703409	0.939508
REACTOME_GASTRIN_CREB_SIGNALLING_PATHWAY_VIA_PKC_AND_MAPK	0.702211	0.903733
PID_RAS_PATHWAY	0.699624	0.908722
REACTOME_ACTIVATION_OF_GENE_EXPRESSION_BY_SREBF_SREBP	0.695883	0.862136
REACTOME_WNT5A_DEPENDENT_INTERNALIZATION_OF_FZD4	0.69467	0.906188
KEGG_LONG_TERM_POTENTIATION	0.694594	0.987854
REACTOME_NITRIC_OXIDE_STIMULATES_GUANYLATE_CYCLASE	0.693775	0.931727
BIOCARTA_IL3_PATHWAY	0.690478	0.943396
REACTOME_RNA_POLYMERASE_II_TRANSCRIPTION_ELONGATION	0.689898	0.815238
BIOCARTA_CCR5_PATHWAY	0.689455	0.933468
REACTOME_NEGATIVE_REGULATION_OF_MET_ACTIVITY	0.687559	0.899209
REACTOME_INWARDLY_RECTIFYING_KPLUS_CHANNELS	0.684357	0.990196
SIG_INSULIN_RECEPTOR_PATHWAY_IN_CARDIAC_MYOCYTES	0.68426	0.930754
REACTOME_SIGNALING_BY_ROBO_RECEPTORS	0.68332	0.88054
PID_CXCR3_PATHWAY	0.673976	0.985685
SIG_PIP3_SIGNALING_IN_B_LYMPHOCYTES	0.672995	0.986
REACTOME_RESOLUTION_OF_SISTER_CHROMATID_COHESION	0.672992	0.821074
REACTOME_REGULATION_OF_EXPRESSION_OF_SLITS_AND_ROBOS	0.671328	0.833333
REACTOME_M_PHASE	0.669707	0.861386
REACTOME_HDR_THROUGH_HOMOLOGOUS_RECOMBINATION_HRR	0.669691	0.843629
REACTOME_HOMOLOGOUS_DNA_PAIRING_AND_STRAND_EXCHANGE	0.668708	0.790385
REACTOME_ACTIVATION_OF_THE_PRE_REPLICATIVE_COMPLEX	0.667411	0.821429
REACTOME_RHO_GTPASES_ACTIVATE_NADPH_OXIDASES	0.667281	0.978218
REACTOME_G1_S_SPECIFIC_TRANSCRIPTION	0.663923	0.818
REACTOME_DIGESTION	0.662411	0.973129
REACTOME_FGFR2_ALTERNATIVE_SPLICING	0.66238	0.896552
REACTOME_VASOPRESSIN_REGULATES_RENAL_WATER_HOMEOSTASIS_VIA_AQUAPORINS	0.658621	0.98996
PID_VEGFR1_PATHWAY	0.650636	0.965092
REACTOME_CHEMOKINE_RECEPTORS_BIND_CHEMOKINES	0.647063	0.990329
REACTOME_REGULATION_OF_GENE_EXPRESSION_IN_LATE_STAGE_BRANCHING_MORPHOGENESIS_PANCREATIC_BUD_PRECURSOR_CELLS	0.642984	0.975104
REACTOME_TRANSCRIPTION_OF_E2F_TARGETS_UNDER_NEGATIVE_CONTROL_BY_P107_RBL1_AND_P130_RBL2_IN_COMPLEX_WITH_HDAC1	0.639886	0.868
BIOCARTA_NKCELLS_PATHWAY	0.637511	0.968379
REACTOME_TRANSCRIPTIONAL_REGULATION_BY_THE_AP_2_TFAP2_FAMILY_OF_TRANSCRIPTION_FACTORS	0.636905	0.995876
REACTOME_MICRORNA_MIRNA_BIOGENESIS	0.633903	0.863198
REACTOME_NUCLEAR_EVENTS_KINASE_AND_TRANSCRIPTION_FACTOR_ACTIVATION	0.633527	0.956612
REACTOME_REGULATION_OF_TP53_EXPRESSION_AND_DEGRADATION	0.63273	0.997984
REACTOME_NAPLUS_CL_DEPENDENT_NEUROTRANSMITTER_TRANSPORTERS	0.630559	0.968553
REACTOME_HIV_LIFE_CYCLE	0.625061	0.941176
REACTOME_FORMATION_OF_SENESCENCE_ASSOCIATED_HETEROCHROMATIN_FOCI_SAHF	0.621505	0.986111
REACTOME_SIGNALING_BY_FGFR2_IIIA_TM	0.619266	0.891519
REACTOME_GAP_FILLING_DNA_REPAIR_SYNTHESIS_AND_LIGATION_IN_GG_NER	0.615808	0.922619
PID_E2F_PATHWAY	0.612296	0.956
REACTOME_RHO_GTPASES_ACTIVATE_FORMINS	0.611843	0.96008
KEGG_BASE_EXCISION_REPAIR	0.609165	0.96
REACTOME_REGULATION_OF_PYRUVATE_DEHYDROGENASE_PDH_COMPLEX	0.60174	0.98996
REACTOME_DEPOLYMERISATION_OF_THE_NUCLEAR_LAMINA	0.600208	0.960707
BIOCARTA_VDR_PATHWAY	0.599612	0.94332
PID_PLK1_PATHWAY	0.599012	0.93254
PID_P53_REGULATION_PATHWAY	0.59243	0.990158
BIOCARTA_CCR3_PATHWAY	0.585338	0.993852
BIOCARTA_BCELLSURVIVAL_PATHWAY	0.581986	0.985801
REACTOME_RECOGNITION_OF_DNA_DAMAGE_BY_PCNA_CONTAINING_REPLICATION_COMPLEX	0.568593	0.938
REACTOME_RESOLUTION_OF_ABASIC_SITES_AP_SITES	0.562697	0.952286
REACTOME_MITOTIC_SPINDLE_CHECKPOINT	0.558184	0.940476
BIOCARTA_G2_PATHWAY	0.541075	0.978044
REACTOME_CELL_CYCLE_CHECKPOINTS	0.517716	0.982213
REACTOME_RNA_POLYMERASE_II_TRANSCRIPTION_PRE_INITIATION_AND_PROMOTER_OPENING	0.497032	0.99422
BIOCARTA_ATRBRCA_PATHWAY	0.487767	0.982283
REACTOME_POLO_LIKE_KINASE_MEDIATED_EVENTS	0.485467	0.959847
BIOCARTA_EFP_PATHWAY	0.452841	0.996016
REACTOME_ACTIVATION_OF_ATR_IN_RESPONSE_TO_REPLICATION_STRESS	0.406015	0.982387
REACTOME_INTERLEUKIN_12_FAMILY_SIGNALING	-1.69828	0
REACTOME_INTERLEUKIN_12_SIGNALING	-1.67465	0.00410678
PID_AP1_PATHWAY	-1.6097	0.0060241
PID_CASPASE_PATHWAY	-1.58083	0.00831601
REACTOME_ANTIGEN_PRESENTATION:_FOLDING_ASSEMBLY_AND_PEPTIDE_LOADING_OF_CLASS_I_MHC	-1.5766	0.022541
BIOCARTA_TID_PATHWAY	-1.56916	0.0165289
REACTOME_GENE_AND_PROTEIN_EXPRESSION_BY_JAK_STAT_SIGNALING_AFTER_INTERLEUKIN_12_STIMULATION	-1.56891	0.016129
BIOCARTA_41BB_PATHWAY	-1.56845	0.010142
BIOCARTA_IL1R_PATHWAY	-1.56279	0.0261044
REACTOME_CELL_EXTRACELLULAR_MATRIX_INTERACTIONS	-1.55778	0.00826446
PID_S1P_S1P1_PATHWAY	-1.54229	0.00992064
REACTOME_LAMININ_INTERACTIONS	-1.54097	0.0747475
REACTOME_COLLAGEN_BIOSYNTHESIS_AND_MODIFYING_ENZYMES	-1.53609	0.0124481
NABA_PROTEOGLYCANS	-1.53071	0.00798403
PID_IL27_PATHWAY	-1.52648	0.0354331
BIOCARTA_NFKB_PATHWAY	-1.51687	0.0330578
REACTOME_TNFS_BIND_THEIR_PHYSIOLOGICAL_RECEPTORS	-1.50609	0.0181452
BIOCARTA_TNFR2_PATHWAY	-1.5039	0.053719
KEGG_PRIMARY_BILE_ACID_BIOSYNTHESIS	-1.50245	0.00617284
REACTOME_TRAF6_MEDIATED_NF_KB_ACTIVATION	-1.49976	0.0371134
KEGG_PORPHYRIN_AND_CHLOROPHYLL_METABOLISM	-1.49235	0.0510204
PID_FRA_PATHWAY	-1.49042	0.0242424
KEGG_ABC_TRANSPORTERS	-1.48906	0.0241449
REACTOME_HYALURONAN_METABOLISM	-1.48447	0.044898
REACTOME_SYNDECAN_INTERACTIONS	-1.48167	0.0692464
REACTOME_NON_INTEGRIN_MEMBRANE_ECM_INTERACTIONS	-1.48026	0.0791075
PID_SYNDECAN_4_PATHWAY	-1.47706	0.0362903
PID_TOLL_ENDOGENOUS_PATHWAY	-1.47558	0.0772358
SIG_REGULATION_OF_THE_ACTIN_CYTOSKELETON_BY_RHO_GTPASES	-1.4714	0.00990099
REACTOME_ECM_PROTEOGLYCANS	-1.4678	0.0588235
REACTOME_DDX58_IFIH1_MEDIATED_INDUCTION_OF_INTERFERON_ALPHA_BETA	-1.46473	0.0334728
PID_TNF_PATHWAY	-1.45543	0.0651731
REACTOME_TNFR2_NON_CANONICAL_NF_KB_PATHWAY	-1.45334	0.0781563
REACTOME_TRNA_MODIFICATION_IN_THE_NUCLEUS_AND_CYTOSOL	-1.44966	0.0564516
REACTOME_TNF_RECEPTOR_SUPERFAMILY_TNFSF_MEMBERS_MEDIATING_NON_CANONICAL_NF_KB_PATHWAY	-1.44846	0.0583501
REACTOME_RRNA_MODIFICATION_IN_THE_NUCLEUS_AND_CYTOSOL	-1.44406	0.0909091
REACTOME_ANTIGEN_PROCESSING_CROSS_PRESENTATION	-1.44194	0.0918367
KEGG_APOPTOSIS	-1.43962	0.0365112
KEGG_FOCAL_ADHESION	-1.43956	0.0712831
BIOCARTA_RELA_PATHWAY	-1.43191	0.060241
REACTOME_NUCLEOBASE_BIOSYNTHESIS	-1.43176	0.0841487
REACTOME_COLLAGEN_DEGRADATION	-1.43116	0.0817996
REACTOME_NUCLEOTIDE_SALVAGE	-1.42974	0.0334728
REACTOME_CASPASE_ACTIVATION_VIA_DEATH_RECEPTORS_IN_THE_PRESENCE_OF_LIGAND	-1.42941	0.0780591
KEGG_TRYPTOPHAN_METABOLISM	-1.42815	0.0184049
KEGG_PARKINSONS_DISEASE	-1.42725	0.0974155
KEGG_GLYCEROLIPID_METABOLISM	-1.42594	0.0409357
KEGG_ALZHEIMERS_DISEASE	-1.42524	0.0745342
BIOCARTA_FMLP_PATHWAY	-1.42348	0.0714286
KEGG_ALLOGRAFT_REJECTION	-1.42108	0.0185567
REACTOME_COLLAGEN_FORMATION	-1.4208	0.0724638
PID_TCR_CALCIUM_PATHWAY	-1.41934	0.0508806
BIOCARTA_CASPASE_PATHWAY	-1.418	0.0693878
REACTOME_REGULATED_NECROSIS	-1.41661	0.078629
NABA_COLLAGENS	-1.41603	0.0621118
REACTOME_COLLAGEN_CHAIN_TRIMERIZATION	-1.41603	0.0621118
REACTOME_DISEASES_ASSOCIATED_WITH_GLYCOSAMINOGLYCAN_METABOLISM	-1.41359	0.0681363
REACTOME_RESPIRATORY_ELECTRON_TRANSPORT_ATP_SYNTHESIS_BY_CHEMIOSMOTIC_COUPLING_AND_HEAT_PRODUCTION_BY_UNCOUPLING_PROTEINS	-1.41328	0.11359
KEGG_PATHOGENIC_ESCHERICHIA_COLI_INFECTION	-1.41242	0.0488798
KEGG_ECM_RECEPTOR_INTERACTION	-1.41205	0.0927835
REACTOME_ANCHORING_FIBRIL_FORMATION	-1.40987	0.114
SA_MMP_CYTOKINE_CONNECTION	-1.40835	0.0878243
KEGG_GLYCOSAMINOGLYCAN_DEGRADATION	-1.40775	0.0785124
REACTOME_COMPLEX_I_BIOGENESIS	-1.40743	0.115226
REACTOME_NEGATIVE_REGULATORS_OF_DDX58_IFIH1_SIGNALING	-1.40633	0.0650407
REACTOME_MET_ACTIVATES_PTK2_SIGNALING	-1.4059	0.0925553
REACTOME_RESPIRATORY_ELECTRON_TRANSPORT	-1.40499	0.134538
REACTOME_BINDING_AND_UPTAKE_OF_LIGANDS_BY_SCAVENGER_RECEPTORS	-1.40494	0.0342742
PID_CERAMIDE_PATHWAY	-1.40218	0.0597938
KEGG_PRION_DISEASES	-1.40213	0.0458333
PID_HIF1_TFPATHWAY	-1.39999	0.0639659
REACTOME_INTERLEUKIN_4_AND_INTERLEUKIN_13_SIGNALING	-1.39876	0.0657084
REACTOME_CROSSLINKING_OF_COLLAGEN_FIBRILS	-1.39863	0.122984
REACTOME_THE_CITRIC_ACID_TCA_CYCLE_AND_RESPIRATORY_ELECTRON_TRANSPORT	-1.39859	0.114919
REACTOME_HEPARAN_SULFATE_HEPARIN_HS_GAG_METABOLISM	-1.39777	0.0668016
REACTOME_TRANSCRIPTIONAL_REGULATION_BY_RUNX2	-1.39251	0.0712831
BIOCARTA_CERAMIDE_PATHWAY	-1.38813	0.0910931
BIOCARTA_NTHI_PATHWAY	-1.38792	0.0833333
BIOCARTA_ERYTH_PATHWAY	-1.38688	0.0991903
PID_DELTA_NP63_PATHWAY	-1.38424	0.0973631
REACTOME_RHO_GTPASES_ACTIVATE_PAKS	-1.38306	0.114
PID_PTP1B_PATHWAY	-1.38213	0.0742972
REACTOME_PLASMA_LIPOPROTEIN_ASSEMBLY	-1.38132	0.00610998
PID_NFAT_TFPATHWAY	-1.38076	0.0439122
REACTOME_GLYCOSAMINOGLYCAN_METABOLISM	-1.38013	0.0633663
REACTOME_DETOXIFICATION_OF_REACTIVE_OXYGEN_SPECIES	-1.37904	0.10101
REACTOME_NOD1_2_SIGNALING_PATHWAY	-1.37901	0.0698152
KEGG_CYTOSOLIC_DNA_SENSING_PATHWAY	-1.37861	0.110656
PID_SYNDECAN_1_PATHWAY	-1.37406	0.0695296
PID_ECADHERIN_STABILIZATION_PATHWAY	-1.36995	0.0865191
REACTOME_DEFECTS_IN_VITAMIN_AND_COFACTOR_METABOLISM	-1.36968	0.0951417
REACTOME_INTERLEUKIN_10_SIGNALING	-1.36946	0.13215
REACTOME_REGULATION_OF_RUNX2_EXPRESSION_AND_ACTIVITY	-1.36844	0.140039
BIOCARTA_MTA3_PATHWAY	-1.36786	0.0462777
REACTOME_METABOLISM_OF_PORPHYRINS	-1.36765	0.141393
KEGG_OXIDATIVE_PHOSPHORYLATION	-1.36711	0.142857
BIOCARTA_NDKDYNAMIN_PATHWAY	-1.36649	0.0671937
REACTOME_SIGNALING_BY_PDGF	-1.36546	0.114688
KEGG_SMALL_CELL_LUNG_CANCER	-1.36354	0.057377
PID_ARF6_TRAFFICKING_PATHWAY	-1.36336	0.0934959
PID_INTEGRIN1_PATHWAY	-1.36322	0.128571
KEGG_JAK_STAT_SIGNALING_PATHWAY	-1.36168	0.0805501
PID_NFKAPPAB_CANONICAL_PATHWAY	-1.36148	0.106776
REACTOME_EXTRACELLULAR_MATRIX_ORGANIZATION	-1.36096	0.0773931
REACTOME_NEUTROPHIL_DEGRANULATION	-1.35804	0.0814196
KEGG_DRUG_METABOLISM_OTHER_ENZYMES	-1.35729	0.0702811
REACTOME_APOPTOTIC_CLEAVAGE_OF_CELLULAR_PROTEINS	-1.35413	0.113131
REACTOME_CITRIC_ACID_CYCLE_TCA_CYCLE	-1.3535	0.0976096
BIOCARTA_STRESS_PATHWAY	-1.35331	0.132075
REACTOME_MITOCHONDRIAL_PROTEIN_IMPORT	-1.35323	0.156126
PID_TCPTP_PATHWAY	-1.35314	0.0798403
PID_IL23_PATHWAY	-1.35074	0.108
REACTOME_TNFR1_INDUCED_NFKAPPAB_SIGNALING_PATHWAY	-1.35062	0.0958084
REACTOME_P75NTR_SIGNALS_VIA_NF_KB	-1.3497	0.0897436
PID_WNT_SIGNALING_PATHWAY	-1.34716	0.0811359
PID_RXR_VDR_PATHWAY	-1.34697	0.105372
REACTOME_DEGRADATION_OF_THE_EXTRACELLULAR_MATRIX	-1.34593	0.111562
REACTOME_CYTOSOLIC_TRNA_AMINOACYLATION	-1.34489	0.149901
KEGG_TYPE_I_DIABETES_MELLITUS	-1.34461	0.0456432
KEGG_RIBOFLAVIN_METABOLISM	-1.34432	0.106299
REACTOME_DISEASES_OF_IMMUNE_SYSTEM	-1.34037	0.171429
REACTOME_NUCLEOTIDE_LIKE_PURINERGIC_RECEPTORS	-1.33993	0.117647
REACTOME_KERATAN_SULFATE_KERATIN_METABOLISM	-1.33757	0.082
REACTOME_RESPONSE_TO_ELEVATED_PLATELET_CYTOSOLIC_CA2PLUS	-1.33697	0.107943
PID_INTEGRIN_A4B1_PATHWAY	-1.33692	0.138144
PID_ANGIOPOIETIN_RECEPTOR_PATHWAY	-1.33591	0.0977597
REACTOME_CLEC7A_DECTIN_1_SIGNALING	-1.33511	0.124236
PID_AVB3_INTEGRIN_PATHWAY	-1.33371	0.151822
PID_SYNDECAN_2_PATHWAY	-1.33054	0.0945674
BIOCARTA_INFLAM_PATHWAY	-1.33053	0.118474
KEGG_NICOTINATE_AND_NICOTINAMIDE_METABOLISM	-1.32975	0.0727273
REACTOME_INTERLEUKIN_20_FAMILY_SIGNALING	-1.32955	0.117296
REACTOME_METABOLISM_OF_CARBOHYDRATES	-1.32928	0.0125523
REACTOME_ABC_FAMILY_PROTEINS_MEDIATED_TRANSPORT	-1.3292	0.143713
REACTOME_BASIGIN_INTERACTIONS	-1.32906	0.0985916
REACTOME_INTERFERON_ALPHA_BETA_SIGNALING	-1.3279	0.161157
BIOCARTA_MEF2D_PATHWAY	-1.32712	0.124236
REACTOME_KERATAN_SULFATE_BIOSYNTHESIS	-1.32578	0.0441767
REACTOME_SCAVENGING_BY_CLASS_A_RECEPTORS	-1.32573	0.033264
PID_INTEGRIN3_PATHWAY	-1.32555	0.167323
REACTOME_VEGFR2_MEDIATED_VASCULAR_PERMEABILITY	-1.32376	0.0508806
PID_CMYB_PATHWAY	-1.32214	0.0720165
REACTOME_ASSEMBLY_OF_COLLAGEN_FIBRILS_AND_OTHER_MULTIMERIC_STRUCTURES	-1.32101	0.175869
KEGG_GLYCOLYSIS_GLUCONEOGENESIS	-1.3204	0.0769231
KEGG_PURINE_METABOLISM	-1.32022	0.0630081
PID_AVB3_OPN_PATHWAY	-1.32008	0.14
REACTOME_NEGATIVE_REGULATION_OF_TCF_DEPENDENT_SIGNALING_BY_WNT_LIGAND_ANTAGONISTS	-1.3179	0.128
REACTOME_EPHB_MEDIATED_FORWARD_SIGNALING	-1.31731	0.105477
BIOCARTA_DEATH_PATHWAY	-1.31669	0.156379
KEGG_ANTIGEN_PROCESSING_AND_PRESENTATION	-1.31595	0.108511
REACTOME_IRON_UPTAKE_AND_TRANSPORT	-1.3158	0.0623701
KEGG_ALANINE_ASPARTATE_AND_GLUTAMATE_METABOLISM	-1.31537	0.0412574
REACTOME_REGULATION_OF_INSULIN_LIKE_GROWTH_FACTOR_IGF_TRANSPORT_AND_UPTAKE_BY_INSULIN_LIKE_GROWTH_FACTOR_BINDING_PROTEINS_IGFBPS	-1.31361	0.097166
REACTOME_TIE2_SIGNALING	-1.31243	0.116803
REACTOME_ZINC_TRANSPORTERS	-1.30894	0.0813008
PID_BETA_CATENIN_NUC_PATHWAY	-1.30627	0.0616302
BIOCARTA_HIVNEF_PATHWAY	-1.30532	0.130705
REACTOME_PLASMA_LIPOPROTEIN_ASSEMBLY_REMODELING_AND_CLEARANCE	-1.30363	0.0766045
PID_ARF_3PATHWAY	-1.30288	0.158
REACTOME_MET_PROMOTES_CELL_MOTILITY	-1.30267	0.176113
REACTOME_METABOLISM_OF_VITAMINS_AND_COFACTORS	-1.30094	0.0368853
REACTOME_TRAF6_MEDIATED_IRF7_ACTIVATION	-1.29861	0.136456
PID_INTEGRIN_CS_PATHWAY	-1.29825	0.160243
PID_INTEGRIN_A9B1_PATHWAY	-1.29728	0.189796
KEGG_CYTOKINE_CYTOKINE_RECEPTOR_INTERACTION	-1.29703	0.0787879
REACTOME_SIGNALING_BY_THE_B_CELL_RECEPTOR_BCR	-1.29657	0.0963115
REACTOME_MTORC1_MEDIATED_SIGNALLING	-1.29312	0.0798403
PID_GLYPICAN_1PATHWAY	-1.29034	0.132812
KEGG_RIG_I_LIKE_RECEPTOR_SIGNALING_PATHWAY	-1.28978	0.147773
REACTOME_PYRUVATE_METABOLISM_AND_CITRIC_ACID_TCA_CYCLE	-1.28885	0.125749
REACTOME_TRNA_AMINOACYLATION	-1.28787	0.195266
REACTOME_REGULATION_OF_RUNX3_EXPRESSION_AND_ACTIVITY	-1.28596	0.208
REACTOME_EPH_EPHRIN_SIGNALING	-1.28537	0.129817
REACTOME_INTEGRIN_CELL_SURFACE_INTERACTIONS	-1.28506	0.209544
REACTOME_PLATELET_ACTIVATION_SIGNALING_AND_AGGREGATION	-1.28154	0.130952
REACTOME_TICAM1_RIP1_MEDIATED_IKK_COMPLEX_RECRUITMENT	-1.2813	0.173554
REACTOME_ASSEMBLY_OF_ACTIVE_LPL_AND_LIPC_LIPASE_COMPLEXES	-1.28002	0.128
REACTOME_CHONDROITIN_SULFATE_BIOSYNTHESIS	-1.27952	0.158859
REACTOME_METABOLISM_OF_WATER_SOLUBLE_VITAMINS_AND_COFACTORS	-1.27861	0.0616016
REACTOME_RNA_POLYMERASE_III_TRANSCRIPTION_TERMINATION	-1.27825	0.199187
REACTOME_COBALAMIN_CBL_VITAMIN_B12_TRANSPORT_AND_METABOLISM	-1.27794	0.167006
BIOCARTA_KERATINOCYTE_PATHWAY	-1.27759	0.111562
REACTOME_BETA_DEFENSINS	-1.27698	0.154309
REACTOME_ACYL_CHAIN_REMODELLING_OF_PI	-1.27619	0.162
BIOCARTA_NUCLEARRS_PATHWAY	-1.27563	0.0987903
REACTOME_CYTOSOLIC_SENSORS_OF_PATHOGEN_ASSOCIATED_DNA	-1.27518	0.12963
BIOCARTA_HIF_PATHWAY	-1.27466	0.137725
KEGG_CITRATE_CYCLE_TCA_CYCLE	-1.2743	0.207585
REACTOME_ARACHIDONIC_ACID_METABOLISM	-1.27187	0.0874752
KEGG_LYSOSOME	-1.27013	0.215886
BIOCARTA_MCALPAIN_PATHWAY	-1.26966	0.184265
REACTOME_SMOOTH_MUSCLE_CONTRACTION	-1.26951	0.226721
PID_S1P_S1P3_PATHWAY	-1.26937	0.180723
PID_TRAIL_PATHWAY	-1.26892	0.164659
REACTOME_SIGNALING_BY_NOTCH4	-1.26823	0.170732
PID_PRL_SIGNALING_EVENTS_PATHWAY	-1.26695	0.151093
REACTOME_PROGRAMMED_CELL_DEATH	-1.26639	0.154639
REACTOME_DEFECTIVE_B4GALT7_CAUSES_EDS_PROGEROID_TYPE	-1.26609	0.188797
REACTOME_PLASMA_LIPOPROTEIN_REMODELING	-1.26605	0.026694
REACTOME_A_TETRASACCHARIDE_LINKER_SEQUENCE_IS_REQUIRED_FOR_GAG_SYNTHESIS	-1.26391	0.147117
PID_IL1_PATHWAY	-1.2624	0.161426
KEGG_ALPHA_LINOLENIC_ACID_METABOLISM	-1.26182	0.0961145
REACTOME_HS_GAG_BIOSYNTHESIS	-1.26086	0.177062
PID_ECADHERIN_KERATINOCYTE_PATHWAY	-1.26023	0.142562
REACTOME_TAK1_ACTIVATES_NFKB_BY_PHOSPHORYLATION_AND_ACTIVATION_OF_IKKS_COMPLEX	-1.25841	0.146392
BIOCARTA_INTEGRIN_PATHWAY	-1.2582	0.157576
REACTOME_CARGO_CONCENTRATION_IN_THE_ER	-1.25802	0.2
KEGG_PATHWAYS_IN_CANCER	-1.25746	0.0853658
PID_P38_ALPHA_BETA_DOWNSTREAM_PATHWAY	-1.25614	0.109091
REACTOME_DEFENSINS	-1.25428	0.162698
KEGG_REGULATION_OF_ACTIN_CYTOSKELETON	-1.25371	0.163561
REACTOME_INTERLEUKIN_1_FAMILY_SIGNALING	-1.2537	0.18239
KEGG_COMPLEMENT_AND_COAGULATION_CASCADES	-1.25341	0.152577
PID_MYC_ACTIV_PATHWAY	-1.25309	0.174349
BIOCARTA_GCR_PATHWAY	-1.25302	0.142292
NABA_CORE_MATRISOME	-1.25231	0.137014
REACTOME_BIOLOGICAL_OXIDATIONS	-1.25203	0.0553279
KEGG_HUNTINGTONS_DISEASE	-1.25	0.198347
PID_IL12_2PATHWAY	-1.24939	0.104628
BIOCARTA_COMP_PATHWAY	-1.24886	0.213992
REACTOME_METABOLISM_OF_NUCLEOTIDES	-1.24817	0.146939
REACTOME_INTERLEUKIN_1_SIGNALING	-1.24673	0.225941
KEGG_OTHER_GLYCAN_DEGRADATION	-1.24627	0.212181
REACTOME_SYNTHESIS_OF_PA	-1.24621	0.157371
PID_TGFBR_PATHWAY	-1.24608	0.169014
KEGG_TOLL_LIKE_RECEPTOR_SIGNALING_PATHWAY	-1.24428	0.186879
BIOCARTA_CYTOKINE_PATHWAY	-1.24349	0.171247
KEGG_DRUG_METABOLISM_CYTOCHROME_P450	-1.24293	0.12
REACTOME_MOLECULES_ASSOCIATED_WITH_ELASTIC_FIBRES	-1.24252	0.246465
SIG_CHEMOTAXIS	-1.24193	0.126923
REACTOME_METABOLISM_OF_FAT_SOLUBLE_VITAMINS	-1.24162	0.155738
REACTOME_GLYCOGEN_STORAGE_DISEASES	-1.24077	0.165618
BIOCARTA_FAS_PATHWAY	-1.24025	0.20935
REACTOME_THE_ROLE_OF_NEF_IN_HIV_1_REPLICATION_AND_DISEASE_PATHOGENESIS	-1.23915	0.179959
REACTOME_INTERFERON_SIGNALING	-1.2382	0.175983
REACTOME_PRESYNAPTIC_FUNCTION_OF_KAINATE_RECEPTORS	-1.23798	0.182731
REACTOME_DISEASES_ASSOCIATED_WITH_N_GLYCOSYLATION_OF_PROTEINS	-1.23796	0.221154
REACTOME_REGULATION_OF_IFNA_SIGNALING	-1.23766	0.219316
REACTOME_DOWNSTREAM_SIGNALING_EVENTS_OF_B_CELL_RECEPTOR_BCR	-1.23663	0.237805
PID_ARF6_DOWNSTREAM_PATHWAY	-1.23579	0.132039
KEGG_LEISHMANIA_INFECTION	-1.23437	0.189135
REACTOME_METABOLISM_OF_POLYAMINES	-1.23411	0.258586
PID_CXCR4_PATHWAY	-1.23205	0.175365
BIOCARTA_PML_PATHWAY	-1.23076	0.192872
PID_P53_DOWNSTREAM_PATHWAY	-1.2304	0.11811
REACTOME_NEGATIVE_REGULATION_OF_NOTCH4_SIGNALING	-1.2289	0.301619
REACTOME_AFLATOXIN_ACTIVATION_AND_DETOXIFICATION	-1.22851	0.210843
REACTOME_PURINE_CATABOLISM	-1.22849	0.144033
REACTOME_INTERLEUKIN_6_FAMILY_SIGNALING	-1.22811	0.27381
REACTOME_INTERLEUKIN_37_SIGNALING	-1.22665	0.183884
REACTOME_PHASE_I_FUNCTIONALIZATION_OF_COMPOUNDS	-1.22586	0.127789
KEGG_FRUCTOSE_AND_MANNOSE_METABOLISM	-1.22385	0.152475
REACTOME_DISEASES_OF_GLYCOSYLATION	-1.22381	0.162162
KEGG_PROTEASOME	-1.22359	0.303213
REACTOME_SIGNALING_BY_RETINOIC_ACID	-1.22274	0.128773
REACTOME_TCR_SIGNALING	-1.22143	0.208417
KEGG_ARRHYTHMOGENIC_RIGHT_VENTRICULAR_CARDIOMYOPATHY_ARVC	-1.22082	0.217659
REACTOME_METABOLISM_OF_NITRIC_OXIDE:_ENOS_ACTIVATION_AND_REGULATION	-1.22071	0.129787
REACTOME_G_BETA:GAMMA_SIGNALLING_THROUGH_CDC42	-1.22023	0.195565
KEGG_METABOLISM_OF_XENOBIOTICS_BY_CYTOCHROME_P450	-1.22019	0.135081
REACTOME_NOTCH3_INTRACELLULAR_DOMAIN_REGULATES_TRANSCRIPTION	-1.21995	0.130859
REACTOME_HS_GAG_DEGRADATION	-1.21745	0.245902
REACTOME_PHOSPHORYLATION_OF_THE_APC_C	-1.21712	0.274029
REACTOME_GLYCOGEN_METABOLISM	-1.21584	0.178197
REACTOME_COMPLEMENT_CASCADE	-1.21411	0.206693
KEGG_PROSTATE_CANCER	-1.2138	0.162109
REACTOME_ELASTIC_FIBRE_FORMATION	-1.21252	0.289855
REACTOME_SIGNAL_AMPLIFICATION	-1.2116	0.169734
BIOCARTA_TOLL_PATHWAY	-1.21149	0.208333
PID_NFAT_3PATHWAY	-1.21135	0.196498
BIOCARTA_ARAP_PATHWAY	-1.21122	0.242972
REACTOME_CELLULAR_RESPONSE_TO_HYPOXIA	-1.21103	0.266667
PID_HIV_NEF_PATHWAY	-1.2106	0.207819
PID_SHP2_PATHWAY	-1.20996	0.161034
REACTOME_ACYL_CHAIN_REMODELLING_OF_PG	-1.2098	0.173913
KEGG_SPHINGOLIPID_METABOLISM	-1.20957	0.148148
REACTOME_CELL_SURFACE_INTERACTIONS_AT_THE_VASCULAR_WALL	-1.20853	0.172277
BIOCARTA_MITOCHONDRIA_PATHWAY	-1.20646	0.236
PID_RAC1_PATHWAY	-1.20601	0.175258
KEGG_THYROID_CANCER	-1.20555	0.138833
NABA_BASEMENT_MEMBRANES	-1.20526	0.277551
PID_P75_NTR_PATHWAY	-1.20503	0.210843
BIOCARTA_CHEMICAL_PATHWAY	-1.20499	0.220648
REACTOME_C_TYPE_LECTIN_RECEPTORS_CLRS	-1.20496	0.197531
KEGG_GLYCEROPHOSPHOLIPID_METABOLISM	-1.20493	0.140496
BIOCARTA_TH1TH2_PATHWAY	-1.20346	0.200787
PID_UPA_UPAR_PATHWAY	-1.20322	0.298174
KEGG_P53_SIGNALING_PATHWAY	-1.20277	0.171315
REACTOME_AUF1_HNRNP_D0_BINDS_AND_DESTABILIZES_MRNA	-1.20196	0.312883
REACTOME_CHONDROITIN_SULFATE_DERMATAN_SULFATE_METABOLISM	-1.20127	0.220884
REACTOME_APOPTOTIC_EXECUTION_PHASE	-1.20089	0.173913
REACTOME_DECTIN_1_MEDIATED_NONCANONICAL_NF_KB_SIGNALING	-1.20059	0.298597
PID_IL6_7_PATHWAY	-1.2005	0.212371
REACTOME_UNFOLDED_PROTEIN_RESPONSE_UPR	-1.19919	0.206967
REACTOME_EPH_EPHRIN_MEDIATED_REPULSION_OF_CELLS	-1.19833	0.170385
KEGG_GRAFT_VERSUS_HOST_DISEASE	-1.19811	0.246377
REACTOME_TRANSCRIPTIONAL_REGULATION_BY_RUNX3	-1.19803	0.233068
KEGG_AMINO_SUGAR_AND_NUCLEOTIDE_SUGAR_METABOLISM	-1.19801	0.269841
REACTOME_TRANSFERRIN_ENDOCYTOSIS_AND_RECYCLING	-1.19731	0.208417
REACTOME_NEF_MEDIATES_DOWN_MODULATION_OF_CELL_SURFACE_RECEPTORS_BY_RECRUITING_THEM_TO_CLATHRIN_ADAPTERS	-1.19613	0.247465
KEGG_TGF_BETA_SIGNALING_PATHWAY	-1.1961	0.207392
REACTOME_NUCLEOTIDE_BINDING_DOMAIN_LEUCINE_RICH_REPEAT_CONTAINING_RECEPTOR_NLR_SIGNALING_PATHWAYS	-1.19551	0.20625
REACTOME_SCF_SKP2_MEDIATED_DEGRADATION_OF_P27_P21	-1.19515	0.320487
REACTOME_TP53_REGULATES_METABOLIC_GENES	-1.19401	0.220472
BIOCARTA_P53HYPOXIA_PATHWAY	-1.19352	0.211881
BIOCARTA_SHH_PATHWAY	-1.19211	0.206759
REACTOME_ENDOGENOUS_STEROLS	-1.1893	0.174538
REACTOME_SHC1_EVENTS_IN_ERBB2_SIGNALING	-1.1883	0.232143
REACTOME_MITOCHONDRIAL_TRNA_AMINOACYLATION	-1.18462	0.262745
KEGG_HEMATOPOIETIC_CELL_LINEAGE	-1.18459	0.260081
PID_TAP63_PATHWAY	-1.18454	0.250996
REACTOME_HOST_INTERACTIONS_OF_HIV_FACTORS	-1.18365	0.300813
REACTOME_PLATELET_CALCIUM_HOMEOSTASIS	-1.1833	0.177645
REACTOME_RUNX2_REGULATES_OSTEOBLAST_DIFFERENTIATION	-1.18251	0.194882
KEGG_LINOLEIC_ACID_METABOLISM	-1.18247	0.199234
REACTOME_VIF_MEDIATED_DEGRADATION_OF_APOBEC3G	-1.18243	0.32582
REACTOME_DEATH_RECEPTOR_SIGNALLING	-1.18231	0.223762
NABA_ECM_REGULATORS	-1.18187	0.197556
KEGG_NOD_LIKE_RECEPTOR_SIGNALING_PATHWAY	-1.18042	0.234818
KEGG_VIBRIO_CHOLERAE_INFECTION	-1.1803	0.199187
PID_MYC_REPRESS_PATHWAY	-1.18029	0.153693
PID_LYSOPHOSPHOLIPID_PATHWAY	-1.17931	0.235409
REACTOME_GLYCOSPHINGOLIPID_METABOLISM	-1.17909	0.265849
REACTOME_FC_EPSILON_RECEPTOR_FCERI_SIGNALING	-1.17793	0.217304
PID_SMAD2_3NUCLEAR_PATHWAY	-1.17505	0.144309
REACTOME_CROSS_PRESENTATION_OF_SOLUBLE_EXOGENOUS_ANTIGENS_ENDOSOMES	-1.1749	0.355102
REACTOME_RHO_GTPASES_ACTIVATE_IQGAPS	-1.17421	0.2625
REACTOME_RHO_GTPASES_ACTIVATE_ROCKS	-1.17377	0.266529
REACTOME_REGULATION_OF_TNFR1_SIGNALING	-1.17363	0.25641
KEGG_PPAR_SIGNALING_PATHWAY	-1.17349	0.216495
KEGG_NITROGEN_METABOLISM	-1.17346	0.205703
BIOCARTA_VIP_PATHWAY	-1.17272	0.277778
REACTOME_MITOCHONDRIAL_BIOGENESIS	-1.17205	0.167331
PID_LYMPH_ANGIOGENESIS_PATHWAY	-1.1707	0.259635
KEGG_PHENYLALANINE_METABOLISM	-1.17021	0.234469
BIOCARTA_TNFR1_PATHWAY	-1.16995	0.252505
REACTOME_SIGNALING_BY_VEGF	-1.16883	0.166324
REACTOME_G_PROTEIN_BETA:GAMMA_SIGNALLING	-1.16853	0.250501
REACTOME_DEGRADATION_OF_GLI1_BY_THE_PROTEASOME	-1.16762	0.344196
REACTOME_GLYCOGEN_BREAKDOWN_GLYCOGENOLYSIS	-1.16732	0.223819
PID_HIF1A_PATHWAY	-1.16668	0.282158
BIOCARTA_PTDINS_PATHWAY	-1.16633	0.252964
REACTOME_HEDGEHOG_ON_STATE	-1.16526	0.298354
PID_CDC42_PATHWAY	-1.16503	0.225296
PID_FAS_PATHWAY	-1.16492	0.248434
KEGG_PENTOSE_PHOSPHATE_PATHWAY	-1.16472	0.240964
BIOCARTA_GSK3_PATHWAY	-1.16435	0.275391
REACTOME_IL_6_TYPE_CYTOKINE_RECEPTOR_LIGAND_INTERACTIONS	-1.16365	0.319361
REACTOME_REGULATION_OF_MRNA_STABILITY_BY_PROTEINS_THAT_BIND_AU_RICH_ELEMENTS	-1.16316	0.323771
REACTOME_TRANSPORT_OF_VITAMINS_NUCLEOSIDES_AND_RELATED_MOLECULES	-1.16271	0.185629
REACTOME_MITOCHONDRIAL_CALCIUM_ION_TRANSPORT	-1.1607	0.210832
REACTOME_RUNX2_REGULATES_BONE_DEVELOPMENT	-1.16016	0.23622
REACTOME_TOLL_LIKE_RECEPTOR_CASCADES	-1.15935	0.244856
BIOCARTA_IL2RB_PATHWAY	-1.1588	0.234252
REACTOME_FCERI_MEDIATED_CAPLUS2_MOBILIZATION	-1.15787	0.219885
BIOCARTA_RHO_PATHWAY	-1.1564	0.32636
REACTOME_TOLL_LIKE_RECEPTOR_4_TLR4_CASCADE	-1.15596	0.258586
REACTOME_ADP_SIGNALLING_THROUGH_P2Y_PURINOCEPTOR_12	-1.15591	0.227006
BIOCARTA_NKT_PATHWAY	-1.15553	0.226891
REACTOME_DEFECTIVE_CFTR_CAUSES_CYSTIC_FIBROSIS	-1.15491	0.346939
REACTOME_CDK_MEDIATED_PHOSPHORYLATION_AND_REMOVAL_OF_CDC6	-1.15444	0.371197
KEGG_VIRAL_MYOCARDITIS	-1.15437	0.260692
REACTOME_TOLL_LIKE_RECEPTOR_TLR1:TLR2_CASCADE	-1.15367	0.239351
REACTOME_EXTRA_NUCLEAR_ESTROGEN_SIGNALING	-1.15313	0.23913
REACTOME_FCERI_MEDIATED_NF_KB_ACTIVATION	-1.1527	0.290722
REACTOME_REGULATION_OF_APOPTOSIS	-1.15204	0.356998
KEGG_PROTEIN_EXPORT	-1.15152	0.306288
REACTOME_MITOCHONDRIAL_TRANSLATION	-1.15136	0.373737
BIOCARTA_INTRINSIC_PATHWAY	-1.15132	0.28252
REACTOME_SIGNALING_BY_MET	-1.15046	0.314815
REACTOME_PHASE_II_CONJUGATION_OF_COMPOUNDS	-1.15031	0.214724
KEGG_GLUTATHIONE_METABOLISM	-1.1499	0.277014
PID_S1P_META_PATHWAY	-1.14986	0.265182
PID_BMP_PATHWAY	-1.1469	0.263056
KEGG_AUTOIMMUNE_THYROID_DISEASE	-1.14584	0.231237
REACTOME_PROSTACYCLIN_SIGNALLING_THROUGH_PROSTACYCLIN_RECEPTOR	-1.14545	0.260437
BIOCARTA_ERAD_PATHWAY	-1.14523	0.255717
REACTOME_IKK_COMPLEX_RECRUITMENT_MEDIATED_BY_RIP1	-1.14513	0.289256
REACTOME_CASPASE_ACTIVATION_VIA_EXTRINSIC_APOPTOTIC_SIGNALLING_PATHWAY	-1.14507	0.307377
KEGG_GLYCOSAMINOGLYCAN_BIOSYNTHESIS_HEPARAN_SULFATE	-1.14319	0.283784
BIOCARTA_IGF1MTOR_PATHWAY	-1.14218	0.27163
REACTOME_TRP_CHANNELS	-1.14131	0.291242
REACTOME_APC_C:CDH1_MEDIATED_DEGRADATION_OF_CDC20_AND_OTHER_APC_C:CDH1_TARGETED_PROTEINS_IN_LATE_MITOSIS_EARLY_G1	-1.14054	0.384146
PID_ILK_PATHWAY	-1.1397	0.280164
KEGG_UBIQUITIN_MEDIATED_PROTEOLYSIS	-1.13772	0.274704
PID_VEGFR1_2_PATHWAY	-1.1371	0.274029
REACTOME_SUMOYLATION_OF_INTRACELLULAR_RECEPTORS	-1.1365	0.266533
BIOCARTA_AKT_PATHWAY	-1.13644	0.274227
REACTOME_REGULATION_OF_TLR_BY_ENDOGENOUS_LIGAND	-1.13638	0.30426
KEGG_N_GLYCAN_BIOSYNTHESIS	-1.13574	0.282306
REACTOME_XENOBIOTICS	-1.13534	0.288235
KEGG_VASCULAR_SMOOTH_MUSCLE_CONTRACTION	-1.1353	0.212551
REACTOME_NUCLEAR_RECEPTOR_TRANSCRIPTION_PATHWAY	-1.13475	0.238095
REACTOME_GLUCONEOGENESIS	-1.13309	0.313492
REACTOME_NICOTINATE_METABOLISM	-1.13231	0.276824
KEGG_NATURAL_KILLER_CELL_MEDIATED_CYTOTOXICITY	-1.13066	0.248996
REACTOME_FBXL7_DOWN_REGULATES_AURKA_DURING_MITOTIC_ENTRY_AND_IN_EARLY_MITOSIS	-1.13038	0.379592
REACTOME_ACTIVATION_OF_MATRIX_METALLOPROTEINASES	-1.12994	0.274227
PID_INTEGRIN5_PATHWAY	-1.12932	0.344196
BIOCARTA_LAIR_PATHWAY	-1.1289	0.4
BIOCARTA_G1_PATHWAY	-1.12875	0.347826
REACTOME_PCP_CE_PATHWAY	-1.12863	0.305835
PID_ALK1_PATHWAY	-1.1281	0.263473
REACTOME_INTERFERON_GAMMA_SIGNALING	-1.12647	0.311475
REACTOME_SCAVENGING_OF_HEME_FROM_PLASMA	-1.12643	0.32696
PID_CD8_TCR_DOWNSTREAM_PATHWAY	-1.12633	0.265625
REACTOME_PRE_NOTCH_PROCESSING_IN_GOLGI	-1.12625	0.309474
REACTOME_NICOTINAMIDE_SALVAGING	-1.12563	0.308333
REACTOME_SIGNALING_BY_RECEPTOR_TYROSINE_KINASES	-1.125	0.232465
REACTOME_RAF_INDEPENDENT_MAPK1_3_ACTIVATION	-1.12457	0.296078
KEGG_GLYCOSAMINOGLYCAN_BIOSYNTHESIS_CHONDROITIN_SULFATE	-1.12426	0.3147
KEGG_VEGF_SIGNALING_PATHWAY	-1.12419	0.212121
PID_ECADHERIN_NASCENT_AJ_PATHWAY	-1.12392	0.331384
REACTOME_DISEASES_OF_CARBOHYDRATE_METABOLISM	-1.12331	0.277083
BIOCARTA_BCR_PATHWAY	-1.12294	0.285714
BIOCARTA_FCER1_PATHWAY	-1.12291	0.279678
REACTOME_BETA_CATENIN_INDEPENDENT_WNT_SIGNALING	-1.12222	0.297405
BIOCARTA_SPRY_PATHWAY	-1.12212	0.323353
REACTOME_MAPK6_MAPK4_SIGNALING	-1.12177	0.335378
KEGG_DILATED_CARDIOMYOPATHY	-1.12116	0.292731
REACTOME_GLYCEROPHOSPHOLIPID_BIOSYNTHESIS	-1.12087	0.241164
SA_CASPASE_CASCADE	-1.11898	0.307054
KEGG_TYROSINE_METABOLISM	-1.11627	0.255061
KEGG_AXON_GUIDANCE	-1.11565	0.251968
REACTOME_TRIF_TICAM1_MEDIATED_TLR4_SIGNALING	-1.11544	0.329243
REACTOME_HEDGEHOG_LIGAND_BIOGENESIS	-1.11492	0.370672
REACTOME_REGULATION_OF_PTEN_STABILITY_AND_ACTIVITY	-1.11373	0.387164
REACTOME_SIGNALING_BY_NON_RECEPTOR_TYROSINE_KINASES	-1.11342	0.262195
REACTOME_CELL_JUNCTION_ORGANIZATION	-1.11286	0.301653
KEGG_O_GLYCAN_BIOSYNTHESIS	-1.11247	0.276639
REACTOME_TNF_SIGNALING	-1.11225	0.3
PID_ER_NONGENOMIC_PATHWAY	-1.11087	0.311765
PID_A6B1_A6B4_INTEGRIN_PATHWAY	-1.11056	0.303644
REACTOME_TRANSCRIPTIONAL_ACTIVATION_OF_MITOCHONDRIAL_BIOGENESIS	-1.10934	0.268924
REACTOME_G1_S_DNA_DAMAGE_CHECKPOINTS	-1.10916	0.415842
REACTOME_CYCLIN_A:CDK2_ASSOCIATED_EVENTS_AT_S_PHASE_ENTRY	-1.10911	0.404762
REACTOME_MITOCHONDRIAL_FATTY_ACID_BETA_OXIDATION	-1.10901	0.327835
PID_FAK_PATHWAY	-1.10866	0.348606
PID_ALPHA_SYNUCLEIN_PATHWAY	-1.10825	0.313953
KEGG_ASTHMA	-1.10746	0.332008
REACTOME_RNA_POLYMERASE_III_CHAIN_ELONGATION	-1.10726	0.362348
REACTOME_ACTIVATED_TAK1_MEDIATES_P38_MAPK_ACTIVATION	-1.10687	0.294606
REACTOME_TRNA_PROCESSING	-1.10658	0.355236
BIOCARTA_CARDIACEGF_PATHWAY	-1.10639	0.312625
REACTOME_FATTY_ACID_METABOLISM	-1.10595	0.312115
REACTOME_VISUAL_PHOTOTRANSDUCTION	-1.10508	0.287726
REACTOME_STABILIZATION_OF_P53	-1.10504	0.412371
REACTOME_P75_NTR_RECEPTOR_MEDIATED_SIGNALLING	-1.10427	0.285425
PID_CD40_PATHWAY	-1.10393	0.249501
REACTOME_INTRINSIC_PATHWAY_OF_FIBRIN_CLOT_FORMATION	-1.10341	0.312896
KEGG_ETHER_LIPID_METABOLISM	-1.10276	0.27439
PID_NECTIN_PATHWAY	-1.10274	0.335354
REACTOME_GLYCOLYSIS	-1.10066	0.347913
REACTOME_ACTIVATION_OF_APC_C_AND_APC_C:CDC20_MEDIATED_DEGRADATION_OF_MITOTIC_PROTEINS	-1.09923	0.420732
REACTOME_PLASMA_LIPOPROTEIN_CLEARANCE	-1.09812	0.365462
REACTOME_TGF_BETA_RECEPTOR_SIGNALING_ACTIVATES_SMADS	-1.09786	0.309771
NABA_ECM_GLYCOPROTEINS	-1.09752	0.35729
PID_HES_HEY_PATHWAY	-1.09717	0.24898
REACTOME_SIGNAL_TRANSDUCTION_BY_L1	-1.09667	0.36
KEGG_AMINOACYL_TRNA_BIOSYNTHESIS	-1.09654	0.354839
REACTOME_EPHA_MEDIATED_GROWTH_CONE_COLLAPSE	-1.09564	0.327381
KEGG_FC_GAMMA_R_MEDIATED_PHAGOCYTOSIS	-1.09482	0.293869
PID_HNF3A_PATHWAY	-1.09378	0.253876
REACTOME_ADP_SIGNALLING_THROUGH_P2Y_PURINOCEPTOR_1	-1.09333	0.342213
REACTOME_CYTOSOLIC_SULFONATION_OF_SMALL_MOLECULES	-1.092	0.347107
REACTOME_DOWNSTREAM_TCR_SIGNALING	-1.09171	0.338086
KEGG_TERPENOID_BACKBONE_BIOSYNTHESIS	-1.09089	0.39375
KEGG_GALACTOSE_METABOLISM	-1.09056	0.308163
REACTOME_ABC_TRANSPORTER_DISORDERS	-1.08805	0.379381
KEGG_LEUKOCYTE_TRANSENDOTHELIAL_MIGRATION	-1.08774	0.33195
REACTOME_ABC_TRANSPORTERS_IN_LIPID_HOMEOSTASIS	-1.08742	0.3174
REACTOME_ACTIVATION_OF_BAD_AND_TRANSLOCATION_TO_MITOCHONDRIA	-1.08742	0.354286
REACTOME_PROTEIN_LOCALIZATION	-1.0871	0.368952
KEGG_CELL_ADHESION_MOLECULES_CAMS	-1.08708	0.358
PID_ENDOTHELIN_PATHWAY	-1.08615	0.302372
REACTOME_ACTIVATION_OF_KAINATE_RECEPTORS_UPON_GLUTAMATE_BINDING	-1.08588	0.350598
REACTOME_GOLGI_ASSOCIATED_VESICLE_BIOGENESIS	-1.08579	0.321792
PID_HIF2PATHWAY	-1.08569	0.301741
BIOCARTA_AMI_PATHWAY	-1.0836	0.385714
KEGG_ADHERENS_JUNCTION	-1.0836	0.314229
REACTOME_PINK_PARKIN_MEDIATED_MITOPHAGY	-1.08329	0.353659
REACTOME_TOLL_LIKE_RECEPTOR_9_TLR9_CASCADE	-1.08316	0.338028
REACTOME_REGULATION_OF_RAS_BY_GAPS	-1.08071	0.411157
REACTOME_VITAMIN_B5_PANTOTHENATE_METABOLISM	-1.08067	0.332673
KEGG_AMYOTROPHIC_LATERAL_SCLEROSIS_ALS	-1.08059	0.298039
REACTOME_CLASS_I_MHC_MEDIATED_ANTIGEN_PROCESSING_PRESENTATION	-1.07964	0.325773
REACTOME_MRNA_DECAY_BY_3_TO_5_EXORIBONUCLEASE	-1.07941	0.386037
REACTOME_COPII_MEDIATED_VESICLE_TRANSPORT	-1.07922	0.38755
REACTOME_ACTIVATION_OF_NF_KAPPAB_IN_B_CELLS	-1.07863	0.412731
KEGG_PYRIMIDINE_METABOLISM	-1.07825	0.375758
REACTOME_ASYMMETRIC_LOCALIZATION_OF_PCP_PROTEINS	-1.07643	0.388211
REACTOME_CALNEXIN_CALRETICULIN_CYCLE	-1.07494	0.350515
PID_AJDISS_2PATHWAY	-1.07403	0.329365
PID_TELOMERASE_PATHWAY	-1.07379	0.332024
REACTOME_OVARIAN_TUMOR_DOMAIN_PROTEASES	-1.07353	0.342105
BIOCARTA_TCR_PATHWAY	-1.07311	0.366472
REACTOME_CREATION_OF_C4_AND_C2_ACTIVATORS	-1.07022	0.357834
REACTOME_DEGRADATION_OF_DVL	-1.07018	0.433333
REACTOME_METAL_ION_SLC_TRANSPORTERS	-1.06965	0.367793
BIOCARTA_EICOSANOID_PATHWAY	-1.06918	0.406186
PID_AR_PATHWAY	-1.06717	0.368209
REACTOME_CYTOCHROME_P450_ARRANGED_BY_SUBSTRATE_TYPE	-1.06622	0.344423
REACTOME_CELL_CELL_COMMUNICATION	-1.06601	0.371951
PID_CD8_TCR_PATHWAY	-1.06598	0.341948
REACTOME_ASPARAGINE_N_LINKED_GLYCOSYLATION	-1.0657	0.375783
REACTOME_LDL_CLEARANCE	-1.06543	0.388781
REACTOME_GAB1_SIGNALOSOME	-1.06437	0.41517
REACTOME_INITIAL_TRIGGERING_OF_COMPLEMENT	-1.06428	0.369231
REACTOME_ASSOCIATION_OF_TRIC_CCT_WITH_TARGET_PROTEINS_DURING_BIOSYNTHESIS	-1.06398	0.402863
KEGG_HYPERTROPHIC_CARDIOMYOPATHY_HCM	-1.06323	0.383984
PID_FCER1_PATHWAY	-1.06168	0.338028
BIOCARTA_EIF_PATHWAY	-1.06045	0.367886
REACTOME_RIP_MEDIATED_NFKB_ACTIVATION_VIA_ZBP1	-1.05977	0.433809
REACTOME_FORMATION_OF_FIBRIN_CLOT_CLOTTING_CASCADE	-1.05972	0.368973
BIOCARTA_P38MAPK_PATHWAY	-1.05965	0.354772
REACTOME_TP53_REGULATES_TRANSCRIPTION_OF_CELL_DEATH_GENES	-1.05897	0.341365
KEGG_BLADDER_CANCER	-1.05779	0.331942
REACTOME_MAP3K8_TPL2_DEPENDENT_MAPK1_3_ACTIVATION	-1.05757	0.381857
REACTOME_HEDGEHOG_OFF_STATE	-1.05607	0.398422
REACTOME_L1CAM_INTERACTIONS	-1.05576	0.332696
BIOCARTA_ALK_PATHWAY	-1.05569	0.359528
KEGG_STARCH_AND_SUCROSE_METABOLISM	-1.05561	0.356998
BIOCARTA_TOB1_PATHWAY	-1.0553	0.368627
REACTOME_IRE1ALPHA_ACTIVATES_CHAPERONES	-1.05445	0.405941
REACTOME_O_GLYCOSYLATION_OF_TSR_DOMAIN_CONTAINING_PROTEINS	-1.0525	0.389344
REACTOME_SIGNALING_BY_HEDGEHOG	-1.05097	0.391837
BIOCARTA_LONGEVITY_PATHWAY	-1.04965	0.374753
BIOCARTA_NFAT_PATHWAY	-1.04949	0.389452
REACTOME_TRANS_GOLGI_NETWORK_VESICLE_BUDDING	-1.04923	0.395538
REACTOME_SYNTHESIS_OF_BILE_ACIDS_AND_BILE_SALTS_VIA_7ALPHA_HYDROXYCHOLESTEROL	-1.04822	0.380855
REACTOME_PROTEIN_FOLDING	-1.04708	0.399606
REACTOME_GLYCOGEN_SYNTHESIS	-1.04654	0.382716
NABA_SECRETED_FACTORS	-1.04596	0.390144
PID_ARF6_PATHWAY	-1.04281	0.395112
REACTOME_DEGRADATION_OF_AXIN	-1.04271	0.471193
REACTOME_N_GLYCAN_TRIMMING_IN_THE_ER_AND_CALNEXIN_CALRETICULIN_CYCLE	-1.04108	0.403727
REACTOME_NUCLEAR_SIGNALING_BY_ERBB4	-1.03768	0.406953
REACTOME_PROLACTIN_RECEPTOR_SIGNALING	-1.03753	0.403162
REACTOME_REGULATION_OF_MITOTIC_CELL_CYCLE	-1.03684	0.45935
REACTOME_G_ALPHA_Q_SIGNALLING_EVENTS	-1.036	0.406571
REACTOME_EGFR_DOWNREGULATION	-1.03552	0.420949
REACTOME_THE_NLRP3_INFLAMMASOME	-1.03446	0.410569
PID_IL4_2PATHWAY	-1.03441	0.385081
REACTOME_ER_TO_GOLGI_ANTEROGRADE_TRANSPORT	-1.03316	0.432653
REACTOME_MYD88_CASCADE_INITIATED_ON_PLASMA_MEMBRANE	-1.0329	0.394737
PID_BCR_5PATHWAY	-1.03123	0.376494
BIOCARTA_CALCINEURIN_PATHWAY	-1.03092	0.413592
PID_PDGFRB_PATHWAY	-1.03072	0.385396
REACTOME_METABOLISM_OF_ANGIOTENSINOGEN_TO_ANGIOTENSINS	-1.03037	0.453988
REACTOME_MAPK_FAMILY_SIGNALING_CASCADES	-1.03013	0.361829
REACTOME_PREFOLDIN_MEDIATED_TRANSFER_OF_SUBSTRATE_TO_CCT_TRIC	-1.02949	0.436735
REACTOME_DISORDERS_OF_TRANSMEMBRANE_TRANSPORTERS	-1.02912	0.404858
KEGG_PANCREATIC_CANCER	-1.02855	0.414634
REACTOME_PYRUVATE_METABOLISM	-1.02853	0.426877
PID_P38_MK2_PATHWAY	-1.02848	0.40619
KEGG_ARACHIDONIC_ACID_METABOLISM	-1.02703	0.41483
REACTOME_INTERLEUKIN_17_SIGNALING	-1.02687	0.402778
REACTOME_GLUCOSE_METABOLISM	-1.02628	0.43787
BIOCARTA_ARENRF2_PATHWAY	-1.02616	0.373518
REACTOME_SYNTHESIS_OF_BILE_ACIDS_AND_BILE_SALTS	-1.0259	0.416327
REACTOME_NEURODEGENERATIVE_DISEASES	-1.02567	0.435583
REACTOME_NUCLEOBASE_CATABOLISM	-1.02549	0.40625
REACTOME_ELEVATION_OF_CYTOSOLIC_CA2PLUS_LEVELS	-1.0219	0.426
REACTOME_RHO_GTPASES_ACTIVATE_CIT	-1.02168	0.424742
BIOCARTA_PTEN_PATHWAY	-1.02129	0.444664
PID_ERBB1_RECEPTOR_PROXIMAL_PATHWAY	-1.02093	0.431174
KEGG_PANTOTHENATE_AND_COA_BIOSYNTHESIS	-1.01959	0.44246
REACTOME_REGULATION_OF_ACTIN_DYNAMICS_FOR_PHAGOCYTIC_CUP_FORMATION	-1.01649	0.420952
REACTOME_MTOR_SIGNALLING	-1.01494	0.449799
REACTOME_TRANSPORT_TO_THE_GOLGI_AND_SUBSEQUENT_MODIFICATION	-1.01476	0.440574
REACTOME_SWITCHING_OF_ORIGINS_TO_A_POST_REPLICATIVE_STATE	-1.01339	0.49697
REACTOME_GLUCURONIDATION	-1.01305	0.441718
REACTOME_THE_ROLE_OF_GTSE1_IN_G2_M_PROGRESSION_AFTER_G2_CHECKPOINT	-1.0112	0.503043
REACTOME_EICOSANOID_LIGAND_BINDING_RECEPTORS	-1.01	0.466
REACTOME_O_LINKED_GLYCOSYLATION	-1.00967	0.437759
PID_KIT_PATHWAY	-1.0091	0.459459
REACTOME_SIGNALING_BY_HIPPO	-1.00831	0.48374
REACTOME_DISEASES_ASSOCIATED_WITH_O_GLYCOSYLATION_OF_PROTEINS	-1.00775	0.444
PID_MTOR_4PATHWAY	-1.00623	0.445525
REACTOME_PLATELET_HOMEOSTASIS	-1.00614	0.422925
REACTOME_SPHINGOLIPID_METABOLISM	-1.00518	0.421053
BIOCARTA_CTCF_PATHWAY	-1.00433	0.476562
KEGG_MAPK_SIGNALING_PATHWAY	-1.00333	0.425703
REACTOME_SYNTHESIS_OF_VERY_LONG_CHAIN_FATTY_ACYL_COAS	-1.00195	0.453608
PID_RAC1_REG_PATHWAY	-1.00159	0.44664
PID_IL2_PI3K_PATHWAY	-1.00155	0.456389
PID_FGF_PATHWAY	-1.00124	0.442913
REACTOME_WNT_LIGAND_BIOGENESIS_AND_TRAFFICKING	-1.00075	0.436326
REACTOME_IMMUNOREGULATORY_INTERACTIONS_BETWEEN_A_LYMPHOID_AND_A_NON_LYMPHOID_CELL	-0.999336	0.468432
REACTOME_DISEASES_OF_METABOLISM	-0.999137	0.463617
REACTOME_GAMMA_CARBOXYLATION_HYPUSINE_FORMATION_AND_ARYLSULFATASE_ACTIVATION	-0.997372	0.46507
REACTOME_CONVERSION_FROM_APC_C:CDC20_TO_APC_C:CDH1_IN_LATE_ANAPHASE	-0.996872	0.452
REACTOME_TRANSLESION_SYNTHESIS_BY_Y_FAMILY_DNA_POLYMERASES_BYPASSES_LESIONS_ON_DNA_TEMPLATE	-0.996318	0.437126
PID_IGF1_PATHWAY	-0.992156	0.483871
PID_ERBB1_DOWNSTREAM_PATHWAY	-0.992129	0.461224
REACTOME_INTRACELLULAR_SIGNALING_BY_SECOND_MESSENGERS	-0.991228	0.458918
REACTOME_SIGNAL_REGULATORY_PROTEIN_FAMILY_INTERACTIONS	-0.99115	0.5
REACTOME_SIGNALING_BY_ERBB4	-0.989891	0.468813
REACTOME_GLUTATHIONE_CONJUGATION	-0.989465	0.469062
REACTOME_ACYL_CHAIN_REMODELLING_OF_PS	-0.989436	0.448819
BIOCARTA_RAC1_PATHWAY	-0.988815	0.468504
BIOCARTA_HCMV_PATHWAY	-0.988287	0.476471
REACTOME_REGULATION_OF_LIPID_METABOLISM_BY_PEROXISOME_PROLIFERATOR_ACTIVATED_RECEPTOR_ALPHA_PPARALPHA	-0.988166	0.464503
KEGG_RENIN_ANGIOTENSIN_SYSTEM	-0.987553	0.585714
KEGG_WNT_SIGNALING_PATHWAY	-0.986331	0.470348
REACTOME_SIGNALING_BY_BMP	-0.985345	0.466019
BIOCARTA_ARF_PATHWAY	-0.984502	0.507099
REACTOME_ADHERENS_JUNCTIONS_INTERACTIONS	-0.984321	0.488706
REACTOME_GRB2_EVENTS_IN_ERBB2_SIGNALING	-0.982971	0.460905
NABA_ECM_AFFILIATED	-0.982595	0.474747
REACTOME_OTHER_INTERLEUKIN_SIGNALING	-0.982297	0.472441
REACTOME_RNA_POLYMERASE_I_TRANSCRIPTION_TERMINATION	-0.981772	0.482618
REACTOME_MHC_CLASS_II_ANTIGEN_PRESENTATION	-0.979879	0.487903
KEGG_CALCIUM_SIGNALING_PATHWAY	-0.979578	0.480885
PID_IL3_PATHWAY	-0.979343	0.498062
REACTOME_SIGNALING_BY_EGFR	-0.979017	0.496982
REACTOME_RHO_GTPASES_ACTIVATE_WASPS_AND_WAVES	-0.978153	0.494867
BIOCARTA_RACCYCD_PATHWAY	-0.977716	0.48073
PID_TXA2PATHWAY	-0.976504	0.491936
REACTOME_METABOLISM_OF_STEROID_HORMONES	-0.976318	0.491054
BIOCARTA_SPPA_PATHWAY	-0.973098	0.497967
PID_ANTHRAX_PATHWAY	-0.972393	0.515213
PID_RB_1PATHWAY	-0.972178	0.495868
KEGG_STEROID_HORMONE_BIOSYNTHESIS	-0.970411	0.511022
PID_INTEGRIN2_PATHWAY	-0.970369	0.504032
PID_EPHA2_FWD_PATHWAY	-0.969415	0.51
REACTOME_SIGNALING_BY_TGF_BETA_RECEPTOR_COMPLEX	-0.968787	0.486815
REACTOME_GAP_JUNCTION_TRAFFICKING_AND_REGULATION	-0.966257	0.524691
REACTOME_ORC1_REMOVAL_FROM_CHROMATIN	-0.964962	0.54918
REACTOME_STIMULI_SENSING_CHANNELS	-0.964897	0.497976
BIOCARTA_HER2_PATHWAY	-0.964504	0.530488
REACTOME_FCGAMMA_RECEPTOR_FCGR_DEPENDENT_PHAGOCYTOSIS	-0.963924	0.515625
KEGG_BASAL_CELL_CARCINOMA	-0.96277	0.497992
REACTOME_SIGNALING_BY_TGF_BETA_FAMILY_MEMBERS	-0.962415	0.522863
REACTOME_TRANSPORT_OF_CONNEXONS_TO_THE_PLASMA_MEMBRANE	-0.961708	0.493042
REACTOME_DAP12_INTERACTIONS	-0.961322	0.528184
PID_NCADHERIN_PATHWAY	-0.960722	0.507014
KEGG_EPITHELIAL_CELL_SIGNALING_IN_HELICOBACTER_PYLORI_INFECTION	-0.960721	0.5154
KEGG_ENDOCYTOSIS	-0.960147	0.48996
REACTOME_CELL_DEATH_SIGNALLING_VIA_NRAGE_NRIF_AND_NADE	-0.960115	0.509921
REACTOME_NOTCH4_INTRACELLULAR_DOMAIN_REGULATES_TRANSCRIPTION	-0.958872	0.528265
KEGG_PROPANOATE_METABOLISM	-0.958091	0.538775
REACTOME_UCH_PROTEINASES	-0.956474	0.538775
REACTOME_APC_C:CDC20_MEDIATED_DEGRADATION_OF_CYCLIN_B	-0.956439	0.515789
REACTOME_ANTIVIRAL_MECHANISM_BY_IFN_STIMULATED_GENES	-0.954954	0.515275
REACTOME_TRAF6_MEDIATED_INDUCTION_OF_TAK1_COMPLEX_WITHIN_TLR4_COMPLEX	-0.954141	0.551102
KEGG_RETINOL_METABOLISM	-0.953871	0.546
REACTOME_SYNTHESIS_OF_SUBSTRATES_IN_N_GLYCAN_BIOSYTHESIS	-0.953653	0.518047
PID_TCR_PATHWAY	-0.952962	0.531621
REACTOME_EFFECTS_OF_PIP2_HYDROLYSIS	-0.952118	0.55511
REACTOME_BILE_ACID_AND_BILE_SALT_METABOLISM	-0.95206	0.535642
PID_THROMBIN_PAR1_PATHWAY	-0.950991	0.507905
REACTOME_DEGRADATION_OF_BETA_CATENIN_BY_THE_DESTRUCTION_COMPLEX	-0.95094	0.539877
REACTOME_PERK_REGULATES_GENE_EXPRESSION	-0.950504	0.528571
KEGG_OOCYTE_MEIOSIS	-0.94834	0.5
REACTOME_THROMBOXANE_SIGNALLING_THROUGH_TP_RECEPTOR	-0.948131	0.519841
REACTOME_METABOLISM_OF_STEROIDS	-0.947069	0.590726
PID_LKB1_PATHWAY	-0.946981	0.524558
REACTOME_SYNTHESIS_OF_PIPS_AT_THE_GOLGI_MEMBRANE	-0.944952	0.563707
PID_RHOA_PATHWAY	-0.944615	0.557769
REACTOME_PTEN_REGULATION	-0.943738	0.549296
REACTOME_INTERCONVERSION_OF_NUCLEOTIDE_DI_AND_TRIPHOSPHATES	-0.942964	0.532803
PID_ERB_GENOMIC_PATHWAY	-0.941861	0.559596
REACTOME_G_ALPHA_I_SIGNALLING_EVENTS	-0.941791	0.607143
KEGG_HEDGEHOG_SIGNALING_PATHWAY	-0.94055	0.556008
BIOCARTA_PYK2_PATHWAY	-0.94042	0.560082
REACTOME_ZBP1_DAI_MEDIATED_INDUCTION_OF_TYPE_I_IFNS	-0.938392	0.553719
REACTOME_ACTIVATION_OF_IRF3_IRF7_MEDIATED_BY_TBK1_IKK_EPSILON	-0.937192	0.544177
REACTOME_TRANSLOCATION_OF_SLC2A4_GLUT4_TO_THE_PLASMA_MEMBRANE	-0.936096	0.553753
REACTOME_OLFACTORY_SIGNALING_PATHWAY	-0.935677	0.534247
PID_P38_MKK3_6PATHWAY	-0.934008	0.582996
REACTOME_DOWNREGULATION_OF_TGF_BETA_RECEPTOR_SIGNALING	-0.933995	0.570833
BIOCARTA_EDG1_PATHWAY	-0.933242	0.572895
REACTOME_VEGFR2_MEDIATED_CELL_PROLIFERATION	-0.932507	0.559524
KEGG_ARGININE_AND_PROLINE_METABOLISM	-0.932062	0.57722
REACTOME_SIGNALING_BY_NOTCH3	-0.93089	0.612371
REACTOME_INFLAMMASOMES	-0.930384	0.622718
KEGG_RENAL_CELL_CARCINOMA	-0.9292	0.573333
BIOCARTA_MAL_PATHWAY	-0.929102	0.573441
KEGG_FATTY_ACID_METABOLISM	-0.928426	0.562628
REACTOME_SIGNALING_BY_WNT	-0.928298	0.64482
BIOCARTA_VEGF_PATHWAY	-0.927761	0.596838
REACTOME_MITOPHAGY	-0.926603	0.546939
KEGG_GAP_JUNCTION	-0.92583	0.578
REACTOME_THE_CANONICAL_RETINOID_CYCLE_IN_RODS_TWILIGHT_VISION	-0.925817	0.575453
PID_HEDGEHOG_GLI_PATHWAY	-0.925741	0.574803
KEGG_PYRUVATE_METABOLISM	-0.925565	0.579477
KEGG_VALINE_LEUCINE_AND_ISOLEUCINE_DEGRADATION	-0.924309	0.559055
REACTOME_APOPTOTIC_FACTOR_MEDIATED_RESPONSE	-0.92333	0.593939
REACTOME_SIGNALING_BY_EGFR_IN_CANCER	-0.922518	0.581053
KEGG_PRIMARY_IMMUNODEFICIENCY	-0.922337	0.682281
PID_RHOA_REG_PATHWAY	-0.921233	0.594378
REACTOME_ION_CHANNEL_TRANSPORT	-0.920796	0.636917
REACTOME_RA_BIOSYNTHESIS_PATHWAY	-0.919347	0.615702
SA_G1_AND_S_PHASES	-0.917972	0.56701
PID_NFKAPPAB_ATYPICAL_PATHWAY	-0.917762	0.600406
KEGG_MELANOMA	-0.917609	0.67319
REACTOME_MUSCLE_CONTRACTION	-0.917519	0.701646
KEGG_ADIPOCYTOKINE_SIGNALING_PATHWAY	-0.917484	0.607843
REACTOME_EPHRIN_SIGNALING	-0.917088	0.569416
KEGG_B_CELL_RECEPTOR_SIGNALING_PATHWAY	-0.916805	0.605159
REACTOME_BUTYRATE_RESPONSE_FACTOR_1_BRF1_BINDS_AND_DESTABILIZES_MRNA	-0.916287	0.606426
REACTOME_COPI_MEDIATED_ANTEROGRADE_TRANSPORT	-0.915485	0.586207
REACTOME_INTRINSIC_PATHWAY_FOR_APOPTOSIS	-0.914779	0.593429
SA_PTEN_PATHWAY	-0.914368	0.60241
PID_IL12_STAT4_PATHWAY	-0.914313	0.58046
REACTOME_INSERTION_OF_TAIL_ANCHORED_PROTEINS_INTO_THE_ENDOPLASMIC_RETICULUM_MEMBRANE	-0.914305	0.580838
KEGG_PENTOSE_AND_GLUCURONATE_INTERCONVERSIONS	-0.913307	0.641189
REACTOME_ACYL_CHAIN_REMODELLING_OF_PE	-0.912958	0.574899
REACTOME_SHC_MEDIATED_CASCADE:FGFR3	-0.912094	0.631783
PID_P73PATHWAY	-0.91142	0.651394
BIOCARTA_IL12_PATHWAY	-0.910281	0.626923
REACTOME_CLASS_A_1_RHODOPSIN_LIKE_RECEPTORS	-0.910003	0.660532
BIOCARTA_ECM_PATHWAY	-0.909922	0.545635
PID_CDC42_REG_PATHWAY	-0.909516	0.570858
REACTOME_ERBB2_REGULATES_CELL_MOTILITY	-0.908835	0.621782
BIOCARTA_AT1R_PATHWAY	-0.908553	0.599594
REACTOME_SEMA4D_IN_SEMAPHORIN_SIGNALING	-0.908065	0.555556
KEGG_HISTIDINE_METABOLISM	-0.906978	0.594378
PID_MET_PATHWAY	-0.90601	0.593496
REACTOME_TRIGLYCERIDE_METABOLISM	-0.905773	0.611336
PID_HEDGEHOG_2PATHWAY	-0.905347	0.626223
BIOCARTA_PGC1A_PATHWAY	-0.905313	0.596899
KEGG_NUCLEOTIDE_EXCISION_REPAIR	-0.905256	0.558767
REACTOME_G_ALPHA_12_13_SIGNALLING_EVENTS	-0.90458	0.614786
REACTOME_NETRIN_1_SIGNALING	-0.904416	0.653846
KEGG_CYSTEINE_AND_METHIONINE_METABOLISM	-0.902223	0.604463
REACTOME_FCERI_MEDIATED_MAPK_ACTIVATION	-0.901857	0.622137
REACTOME_BIOSYNTHESIS_OF_THE_N_GLYCAN_PRECURSOR_DOLICHOL_LIPID_LINKED_OLIGOSACCHARIDE_LLO_AND_TRANSFER_TO_A_NASCENT_PROTEIN	-0.901551	0.624738
REACTOME_OTHER_SEMAPHORIN_INTERACTIONS	-0.901408	0.604
BIOCARTA_ETS_PATHWAY	-0.901289	0.67451
REACTOME_SYNTHESIS_OF_BILE_ACIDS_AND_BILE_SALTS_VIA_27_HYDROXYCHOLESTEROL	-0.899633	0.620278
REACTOME_STRIATED_MUSCLE_CONTRACTION	-0.899437	0.674322
REACTOME_NEDDYLATION	-0.899344	0.612632
REACTOME_RECYCLING_PATHWAY_OF_L1	-0.896933	0.621094
REACTOME_DOWNSTREAM_SIGNAL_TRANSDUCTION	-0.896723	0.634888
BIOCARTA_MAPK_PATHWAY	-0.896648	0.647773
REACTOME_DNA_DAMAGE_RECOGNITION_IN_GG_NER	-0.896179	0.613497
REACTOME_O_LINKED_GLYCOSYLATION_OF_MUCINS	-0.896154	0.698603
REACTOME_FORMATION_OF_INCISION_COMPLEX_IN_GG_NER	-0.895872	0.606786
REACTOME_SYNTHESIS_OF_PC	-0.895747	0.686475
REACTOME_DUAL_INCISION_IN_GG_NER	-0.894788	0.591549
PID_WNT_NONCANONICAL_PATHWAY	-0.893056	0.682573
REACTOME_BRANCHED_CHAIN_AMINO_ACID_CATABOLISM	-0.891713	0.619048
REACTOME_NCAM1_INTERACTIONS	-0.891403	0.665298
PID_RHODOPSIN_PATHWAY	-0.889413	0.650888
KEGG_T_CELL_RECEPTOR_SIGNALING_PATHWAY	-0.888172	0.687873
SA_B_CELL_RECEPTOR_COMPLEXES	-0.887676	0.619522
REACTOME_HIV_INFECTION	-0.886981	0.616803
REACTOME_GABA_RECEPTOR_ACTIVATION	-0.886742	0.72233
REACTOME_NRAGE_SIGNALS_DEATH_THROUGH_JNK	-0.886513	0.616601
REACTOME_SYNTHESIS_SECRETION_AND_DEACYLATION_OF_GHRELIN	-0.886447	0.698
KEGG_CHRONIC_MYELOID_LEUKEMIA	-0.885604	0.719439
REACTOME_PHOSPHOLIPID_METABOLISM	-0.885298	0.686354
REACTOME_TERMINATION_OF_TRANSLESION_DNA_SYNTHESIS	-0.884544	0.585799
PID_AMB2_NEUTROPHILS_PATHWAY	-0.884442	0.654832
REACTOME_SIALIC_ACID_METABOLISM	-0.884355	0.709474
BIOCARTA_IL6_PATHWAY	-0.883402	0.612774
REACTOME_ACYL_CHAIN_REMODELLING_OF_PC	-0.883157	0.685885
PID_INSULIN_GLUCOSE_PATHWAY	-0.882634	0.660118
REACTOME_SYNTHESIS_OF_IP3_AND_IP4_IN_THE_CYTOSOL	-0.881513	0.656805
KEGG_TIGHT_JUNCTION	-0.880337	0.658996
REACTOME_ACTIVATION_OF_SMO	-0.880326	0.746964
REACTOME_POST_CHAPERONIN_TUBULIN_FOLDING_PATHWAY	-0.879824	0.610236
REACTOME_DISEASES_OF_SIGNAL_TRANSDUCTION	-0.879612	0.729897
REACTOME_COSTIMULATION_BY_THE_CD28_FAMILY	-0.879556	0.672
REACTOME_RNA_POLYMERASE_III_TRANSCRIPTION	-0.879322	0.601643
BIOCARTA_GPCR_PATHWAY	-0.878916	0.613281
PID_IL2_STAT5_PATHWAY	-0.878292	0.693548
REACTOME_COMMON_PATHWAY_OF_FIBRIN_CLOT_FORMATION	-0.878092	0.619718
REACTOME_THE_PHOTOTRANSDUCTION_CASCADE	-0.877901	0.729839
KEGG_GLYOXYLATE_AND_DICARBOXYLATE_METABOLISM	-0.877658	0.603206
REACTOME_SIGNALLING_TO_RAS	-0.875776	0.657084
KEGG_MELANOGENESIS	-0.873094	0.841603
PID_ERBB_NETWORK_PATHWAY	-0.873016	0.657258
KEGG_BUTANOATE_METABOLISM	-0.872841	0.661323
REACTOME_PROCESSING_OF_INTRONLESS_PRE_MRNAS	-0.869979	0.628283
REACTOME_INSULIN_RECEPTOR_RECYCLING	-0.869639	0.672727
REACTOME_G_ALPHA_Z_SIGNALLING_EVENTS	-0.869326	0.694981
REACTOME_TRIGLYCERIDE_CATABOLISM	-0.869249	0.659878
REACTOME_COPI_DEPENDENT_GOLGI_TO_ER_RETROGRADE_TRAFFIC	-0.867996	0.647177
KEGG_CARDIAC_MUSCLE_CONTRACTION	-0.867901	0.649694
KEGG_LYSINE_DEGRADATION	-0.867852	0.651923
KEGG_GLIOMA	-0.867347	0.780392
REACTOME_DNA_REPLICATION	-0.866152	0.638604
REACTOME_RECEPTOR_TYPE_TYROSINE_PROTEIN_PHOSPHATASES	-0.865402	0.693957
REACTOME_DAP12_SIGNALING	-0.865005	0.667331
REACTOME_ASSEMBLY_OF_THE_PRE_REPLICATIVE_COMPLEX	-0.864758	0.628866
REACTOME_FATTY_ACYL_COA_BIOSYNTHESIS	-0.863782	0.796334
WNT_SIGNALING	-0.862866	0.907298
REACTOME_CA2PLUS_PATHWAY	-0.862188	0.743902
REACTOME_CELLULAR_RESPONSES_TO_STRESS	-0.860846	0.648594
REACTOME_OPIOID_SIGNALLING	-0.859549	0.726562
REACTOME_REGULATION_OF_HSF1_MEDIATED_HEAT_SHOCK_RESPONSE	-0.857882	0.646817
REACTOME_POST_TRANSLATIONAL_MODIFICATION:_SYNTHESIS_OF_GPI_ANCHORED_PROTEINS	-0.857724	0.745303
REACTOME_NEGATIVE_REGULATION_OF_THE_PI3K_AKT_NETWORK	-0.857654	0.722222
REACTOME_FACTORS_INVOLVED_IN_MEGAKARYOCYTE_DEVELOPMENT_AND_PLATELET_PRODUCTION	-0.854866	0.744639
REACTOME_COOPERATION_OF_PREFOLDIN_AND_TRIC_CCT_IN_ACTIN_AND_TUBULIN_FOLDING	-0.853615	0.640974
REACTOME_GROWTH_HORMONE_RECEPTOR_SIGNALING	-0.853549	0.692008
REACTOME_ROLE_OF_PHOSPHOLIPIDS_IN_PHAGOCYTOSIS	-0.852031	0.714556
REACTOME_SLC_MEDIATED_TRANSMEMBRANE_TRANSPORT	-0.851247	0.83499
REACTOME_PROCESSING_OF_CAPPED_INTRONLESS_PRE_MRNA	-0.851198	0.656504
PID_IL8_CXCR1_PATHWAY	-0.85068	0.701375
BIOCARTA_PITX2_PATHWAY	-0.847611	0.70217
REACTOME_G_PROTEIN_MEDIATED_EVENTS	-0.847301	0.727099
PID_EPHB_FWD_PATHWAY	-0.847228	0.717132
REACTOME_TRANSPORT_OF_MATURE_MRNAS_DERIVED_FROM_INTRONLESS_TRANSCRIPTS	-0.846303	0.658635
REACTOME_SEMA3A_PAK_DEPENDENT_AXON_REPULSION	-0.846112	0.689243
REACTOME_PEPTIDE_LIGAND_BINDING_RECEPTORS	-0.84528	0.793939
KEGG_SNARE_INTERACTIONS_IN_VESICULAR_TRANSPORT	-0.842756	0.652977
REACTOME_REGULATION_OF_INNATE_IMMUNE_RESPONSES_TO_CYTOSOLIC_DNA	-0.842714	0.679834
REACTOME_CD28_CO_STIMULATION	-0.842633	0.742248
REACTOME_METABOLISM_OF_COFACTORS	-0.841172	0.686071
REACTOME_GLOBAL_GENOME_NUCLEOTIDE_EXCISION_REPAIR_GG_NER	-0.83848	0.659878
REACTOME_GOLGI_TO_ER_RETROGRADE_TRANSPORT	-0.837793	0.704684
REACTOME_ANTIGEN_PROCESSING:_UBIQUITINATION_PROTEASOME_DEGRADATION	-0.837449	0.728195
REACTOME_SIGNALING_BY_LIGAND_RESPONSIVE_EGFR_VARIANTS_IN_CANCER	-0.836618	0.784969
KEGG_RNA_POLYMERASE	-0.83476	0.668776
BIOCARTA_CDMAC_PATHWAY	-0.834517	0.715139
REACTOME_SLC_TRANSPORTER_DISORDERS	-0.833916	0.868154
BIOCARTA_ATM_PATHWAY	-0.833519	0.701219
REACTOME_MITOTIC_G1_G1_S_PHASES	-0.833319	0.659229
REACTOME_SMAD2_SMAD3:SMAD4_HETEROTRIMER_REGULATES_TRANSCRIPTION	-0.832456	0.752083
PID_AR_NONGENOMIC_PATHWAY	-0.831347	0.728175
REACTOME_DOWNREGULATION_OF_ERBB2_SIGNALING	-0.831299	0.80202
REACTOME_ROLE_OF_LAT2_NTAL_LAB_ON_CALCIUM_MOBILIZATION	-0.830993	0.712963
KEGG_PEROXISOME	-0.830311	0.713098
REACTOME_PEROXISOMAL_LIPID_METABOLISM	-0.82903	0.683438
REACTOME_SIGNALING_BY_NOTCH	-0.828687	0.784067
REACTOME_CONSTITUTIVE_SIGNALING_BY_ABERRANT_PI3K_IN_CANCER	-0.828121	0.805501
REACTOME_RHO_GTPASE_CYCLE	-0.82784	0.80754
REACTOME_INTERACTIONS_OF_VPR_WITH_HOST_CELLULAR_PROTEINS	-0.827296	0.643585
REACTOME_SEMA4D_INDUCED_CELL_MIGRATION_AND_GROWTH_CONE_COLLAPSE	-0.827184	0.714
KEGG_CHEMOKINE_SIGNALING_PATHWAY	-0.827059	0.828
KEGG_GLYCOSPHINGOLIPID_BIOSYNTHESIS_GANGLIO_SERIES	-0.826972	0.708502
REACTOME_INTRA_GOLGI_AND_RETROGRADE_GOLGI_TO_ER_TRAFFIC	-0.826411	0.705021
REACTOME_N_GLYCAN_ANTENNAE_ELONGATION_IN_THE_MEDIAL_TRANS_GOLGI	-0.826285	0.775758
KEGG_LONG_TERM_DEPRESSION	-0.826137	0.864762
REACTOME_REGULATION_OF_FZD_BY_UBIQUITINATION	-0.825396	0.751579
REACTOME_TRANSCRIPTIONAL_REGULATION_OF_PLURIPOTENT_STEM_CELLS	-0.825105	0.762
REACTOME_CLATHRIN_MEDIATED_ENDOCYTOSIS	-0.824434	0.779116
BIOCARTA_DC_PATHWAY	-0.822167	0.84114
REACTOME_SEMAPHORIN_INTERACTIONS	-0.822109	0.775591
REACTOME_NUCLEAR_PORE_COMPLEX_NPC_DISASSEMBLY	-0.821955	0.654618
REACTOME_ATF4_ACTIVATES_GENES_IN_RESPONSE_TO_ENDOPLASMIC_RETICULUM_STRESS	-0.819763	0.747475
REACTOME_PI3K_AKT_SIGNALING_IN_CANCER	-0.819583	0.888016
PID_EPO_PATHWAY	-0.819498	0.764023
REACTOME_INHIBITION_OF_THE_PROTEOLYTIC_ACTIVITY_OF_APC_C_REQUIRED_FOR_THE_ONSET_OF_ANAPHASE_BY_MITOTIC_SPINDLE_CHECKPOINT_COMPONENTS	-0.819106	0.677019
REACTOME_GPVI_MEDIATED_ACTIVATION_CASCADE	-0.818776	0.755725
KEGG_INTESTINAL_IMMUNE_NETWORK_FOR_IGA_PRODUCTION	-0.817889	0.779592
REACTOME_RAB_GERANYLGERANYLATION	-0.816309	0.784679
REACTOME_PLATELET_SENSITIZATION_BY_LDL	-0.815171	0.768463
PID_NETRIN_PATHWAY	-0.814678	0.765873
REACTOME_SULFUR_AMINO_ACID_METABOLISM	-0.814678	0.798387
KEGG_RNA_DEGRADATION	-0.813218	0.680244
REACTOME_DISEASES_ASSOCIATED_WITH_GLYCOSYLATION_PRECURSOR_BIOSYNTHESIS	-0.810952	0.688845
REACTOME_CELL_CELL_JUNCTION_ORGANIZATION	-0.810635	0.870775
REACTOME_DEUBIQUITINATION	-0.80968	0.772636
REACTOME_TRANSPORT_OF_BILE_SALTS_AND_ORGANIC_ACIDS_METAL_IONS_AND_AMINE_COMPOUNDS	-0.808801	0.885827
BIOCARTA_CELLCYCLE_PATHWAY	-0.808617	0.709486
REACTOME_DNA_DAMAGE_BYPASS	-0.80793	0.674556
REACTOME_GPCR_LIGAND_BINDING	-0.805682	0.937876
REACTOME_TP53_REGULATES_TRANSCRIPTION_OF_GENES_INVOLVED_IN_G2_CELL_CYCLE_ARREST	-0.804892	0.733871
REACTOME_SIGNALING_BY_ERBB2	-0.803692	0.817097
PID_HDAC_CLASSI_PATHWAY	-0.803221	0.85
PID_AURORA_B_PATHWAY	-0.802768	0.727642
REACTOME_METABOLISM_OF_AMINO_ACIDS_AND_DERIVATIVES	-0.802325	0.779835
REACTOME_CD28_DEPENDENT_PI3K_AKT_SIGNALING	-0.801543	0.848249
PID_RET_PATHWAY	-0.80142	0.752536
REACTOME_TGF_BETA_RECEPTOR_SIGNALING_IN_EMT_EPITHELIAL_TO_MESENCHYMAL_TRANSITION	-0.799567	0.793033
PID_SYNDECAN_3_PATHWAY	-0.798978	0.723577
PID_ATF2_PATHWAY	-0.798728	0.875728
REACTOME_SUMOYLATION_OF_TRANSCRIPTION_FACTORS	-0.795706	0.794297
REACTOME_MYOGENESIS	-0.793559	0.803571
BIOCARTA_MTOR_PATHWAY	-0.792281	0.754864
REACTOME_NRIF_SIGNALS_CELL_DEATH_FROM_THE_NUCLEUS	-0.792166	0.794297
REACTOME_N_GLYCAN_ANTENNAE_ELONGATION	-0.791958	0.818182
REACTOME_TRANSLATION	-0.79094	0.719512
KEGG_ASCORBATE_AND_ALDARATE_METABOLISM	-0.790435	0.799197
REACTOME_TP53_REGULATES_TRANSCRIPTION_OF_CELL_CYCLE_GENES	-0.78927	0.697266
REACTOME_GABA_B_RECEPTOR_ACTIVATION	-0.788533	0.893281
REACTOME_TCF_DEPENDENT_SIGNALING_IN_RESPONSE_TO_WNT	-0.78734	0.900621
PID_AURORA_A_PATHWAY	-0.787327	0.787321
REACTOME_THROMBIN_SIGNALLING_THROUGH_PROTEINASE_ACTIVATED_RECEPTORS_PARS	-0.786896	0.786
REACTOME_ION_HOMEOSTASIS	-0.785031	0.894845
REACTOME_RNA_POLYMERASE_III_TRANSCRIPTION_INITIATION_FROM_TYPE_1_PROMOTER	-0.782645	0.732632
REACTOME_DNA_REPLICATION_PRE_INITIATION	-0.78124	0.699588
KEGG_CELL_CYCLE	-0.781129	0.726721
PID_TRKR_PATHWAY	-0.780557	0.872428
REACTOME_REGULATION_OF_PTEN_GENE_TRANSCRIPTION	-0.779378	0.887324
PID_THROMBIN_PAR4_PATHWAY	-0.775951	0.781124
REACTOME_S_PHASE	-0.774111	0.708419
PID_MYC_PATHWAY	-0.773747	0.812371
REACTOME_DARPP_32_EVENTS	-0.773343	0.78389
REACTOME_HOST_INTERACTIONS_WITH_INFLUENZA_FACTORS	-0.772319	0.690574
REACTOME_TRANSPORT_OF_THE_SLBP_DEPENDANT_MATURE_MRNA	-0.771844	0.714
KEGG_ONE_CARBON_POOL_BY_FOLATE	-0.770144	0.786585
KEGG_PHOSPHATIDYLINOSITOL_SIGNALING_SYSTEM	-0.769711	0.846918
KEGG_FC_EPSILON_RI_SIGNALING_PATHWAY	-0.766293	0.956522
PID_FOXO_PATHWAY	-0.766089	0.819253
REACTOME_NUCLEOTIDE_EXCISION_REPAIR	-0.765693	0.754564
REACTOME_FORMATION_OF_TC_NER_PRE_INCISION_COMPLEX	-0.762978	0.727083
PID_IL8_CXCR2_PATHWAY	-0.7626	0.812375
REACTOME_UB_SPECIFIC_PROCESSING_PROTEASES	-0.761177	0.826884
REACTOME_CIRCADIAN_CLOCK	-0.760249	0.920833
REACTOME_G1_PHASE	-0.759824	0.827655
REACTOME_RNA_POLYMERASE_II_TRANSCRIPTION_TERMINATION	-0.756687	0.738776
SIG_BCR_SIGNALING_PATHWAY	-0.756475	0.855159
REACTOME_BMAL1:CLOCK_NPAS2_ACTIVATES_CIRCADIAN_GENE_EXPRESSION	-0.756371	0.813387
REACTOME_COPI_INDEPENDENT_GOLGI_TO_ER_RETROGRADE_TRAFFIC	-0.756339	0.829569
PID_PI3KCI_PATHWAY	-0.75555	0.931864
REACTOME_NEPHRIN_FAMILY_INTERACTIONS	-0.755436	0.831349
REACTOME_TRANSPORT_OF_MATURE_TRANSCRIPT_TO_CYTOPLASM	-0.751214	0.726358
BIOCARTA_AGR_PATHWAY	-0.750879	0.879208
REACTOME_SYNTHESIS_OF_ACTIVE_UBIQUITIN:_ROLES_OF_E1_AND_E2_ENZYMES	-0.750362	0.811508
REACTOME_INTERLEUKIN_RECEPTOR_SHC_SIGNALING	-0.749874	0.84
REACTOME_RNA_POLYMERASE_III_TRANSCRIPTION_INITIATION_FROM_TYPE_3_PROMOTER	-0.749827	0.784274
REACTOME_JNK_C_JUN_KINASES_PHOSPHORYLATION_AND_ACTIVATION_MEDIATED_BY_ACTIVATED_HUMAN_TAK1	-0.746841	0.913131
REACTOME_NUCLEAR_ENVELOPE_BREAKDOWN	-0.74672	0.770791
REACTOME_TRNA_PROCESSING_IN_THE_NUCLEUS	-0.745734	0.750515
REACTOME_PI3K_EVENTS_IN_ERBB2_SIGNALING	-0.744873	0.780632
REACTOME_METABOLISM_OF_FOLATE_AND_PTERINES	-0.743219	0.894309
KEGG_OLFACTORY_TRANSDUCTION	-0.742204	0.95
KEGG_NEUROTROPHIN_SIGNALING_PATHWAY	-0.741488	0.959144
REACTOME_KSRP_KHSRP_BINDS_AND_DESTABILIZES_MRNA	-0.740469	0.811741
REACTOME_ANTIMICROBIAL_PEPTIDES	-0.739711	0.916155
REACTOME_SIGNALING_BY_SCF_KIT	-0.739046	0.930097
REACTOME_CELLULAR_RESPONSE_TO_HEAT_STRESS	-0.738388	0.84265
BIOCARTA_PAR1_PATHWAY	-0.737888	0.783626
BIOCARTA_EIF4_PATHWAY	-0.735545	0.869396
REACTOME_ANTIGEN_ACTIVATES_B_CELL_RECEPTOR_BCR_LEADING_TO_GENERATION_OF_SECOND_MESSENGERS	-0.733095	0.893738
REACTOME_VXPX_CARGO_TARGETING_TO_CILIUM	-0.732629	0.844828
REACTOME_FORMATION_OF_TUBULIN_FOLDING_INTERMEDIATES_BY_CCT_TRIC	-0.73165	0.790927
REACTOME_TRANSCRIPTIONAL_REGULATION_BY_TP53	-0.729793	0.891129
REACTOME_CD22_MEDIATED_BCR_REGULATION	-0.72709	0.865234
BIOCARTA_TFF_PATHWAY	-0.721963	0.855731
REACTOME_INTERLEUKIN_2_FAMILY_SIGNALING	-0.718961	0.929961
REACTOME_PIWI_INTERACTING_RNA_PIRNA_BIOGENESIS	-0.718117	0.942574
REACTOME_MISCELLANEOUS_TRANSPORT_AND_BINDING_EVENTS	-0.717178	0.89391
REACTOME_RNA_POLYMERASE_II_TRANSCRIBES_SNRNA_GENES	-0.716422	0.87269
REACTOME_MITOTIC_METAPHASE_AND_ANAPHASE	-0.715039	0.769388
REACTOME_METABOLISM_OF_NON_CODING_RNA	-0.713856	0.770526
REACTOME_GAP_JUNCTION_ASSEMBLY	-0.713482	0.924797
REACTOME_ENERGY_DEPENDENT_REGULATION_OF_MTOR_BY_LKB1_AMPK	-0.710901	0.937751
REACTOME_ESTROGEN_DEPENDENT_NUCLEAR_EVENTS_DOWNSTREAM_OF_ESR_MEMBRANE_SIGNALING	-0.707428	0.92016
REACTOME_GLYOXYLATE_METABOLISM_AND_GLYCINE_DEGRADATION	-0.707208	0.916836
PID_INSULIN_PATHWAY	-0.706744	0.944
REACTOME_APC_CDC20_MEDIATED_DEGRADATION_OF_NEK2A	-0.704204	0.822917
REACTOME_PHASE_4_RESTING_MEMBRANE_POTENTIAL	-0.703723	0.925344
REACTOME_TRANSCRIPTION_COUPLED_NUCLEOTIDE_EXCISION_REPAIR_TC_NER	-0.703417	0.813008
REACTOME_TRISTETRAPROLIN_TTP_ZFP36_BINDS_AND_DESTABILIZES_MRNA	-0.701347	0.882114
BIOCARTA_ERK_PATHWAY	-0.701004	0.930967
KEGG_INOSITOL_PHOSPHATE_METABOLISM	-0.700469	0.967413
REACTOME_MICROAUTOPHAGY	-0.700061	0.919588
REACTOME_EXPORT_OF_VIRAL_RIBONUCLEOPROTEINS_FROM_NUCLEUS	-0.698987	0.755467
REACTOME_BIOSYNTHESIS_OF_SPECIALIZED_PRORESOLVING_MEDIATORS_SPMS	-0.698249	0.925253
BIOCARTA_CXCR4_PATHWAY	-0.697831	0.92229
REACTOME_RNA_POLYMERASE_I_TRANSCRIPTION_INITIATION	-0.695939	0.915984
PID_FOXM1_PATHWAY	-0.694932	0.837624
REACTOME_G_PROTEIN_GATED_POTASSIUM_CHANNELS	-0.691715	0.972112
KEGG_PROXIMAL_TUBULE_BICARBONATE_RECLAMATION	-0.691467	0.951456
REACTOME_TP53_REGULATES_TRANSCRIPTION_OF_ADDITIONAL_CELL_CYCLE_GENES_WHOSE_EXACT_ROLE_IN_THE_P53_PATHWAY_REMAIN_UNCERTAIN	-0.691212	0.95
PID_PS1_PATHWAY	-0.689443	0.978131
REACTOME_COOPERATION_OF_PDCL_PHLP1_AND_TRIC_CCT_IN_G_PROTEIN_BETA_FOLDING	-0.689177	0.964844
PID_ERBB4_PATHWAY	-0.687972	0.964706
REACTOME_DEADENYLATION_DEPENDENT_MRNA_DECAY	-0.68293	0.918972
REACTOME_ACTIVATION_OF_AMPK_DOWNSTREAM_OF_NMDARS	-0.681435	0.905838
REACTOME_DEFECTIVE_TPR_MAY_CONFER_SUSCEPTIBILITY_TOWARDS_THYROID_PAPILLARY_CARCINOMA_TPC	-0.681389	0.806452
REACTOME_INTERACTIONS_OF_REV_WITH_HOST_CELLULAR_PROTEINS	-0.68072	0.757028
REACTOME_ER_QUALITY_CONTROL_COMPARTMENT_ERQC	-0.679925	0.929019
REACTOME_VIRAL_MESSENGER_RNA_SYNTHESIS	-0.678204	0.821656
KEGG_STEROID_BIOSYNTHESIS	-0.678172	0.89391
REACTOME_NUCLEAR_IMPORT_OF_REV_PROTEIN	-0.674946	0.792608
KEGG_MISMATCH_REPAIR	-0.674383	0.781563
REACTOME_HSP90_CHAPERONE_CYCLE_FOR_STEROID_HORMONE_RECEPTORS_SHR	-0.674269	0.909836
REACTOME_G0_AND_EARLY_G1	-0.672781	0.830677
REACTOME_PEROXISOMAL_PROTEIN_IMPORT	-0.671373	0.947589
REACTOME_CHOLESTEROL_BIOSYNTHESIS	-0.668277	0.815951
REACTOME_DUAL_INCISION_IN_TC_NER	-0.665441	0.882716
REACTOME_FCGR_ACTIVATION	-0.661893	0.936047
REACTOME_SIGNALING_BY_NTRK3_TRKC	-0.655752	0.974359
REACTOME_PROCESSING_OF_CAPPED_INTRON_CONTAINING_PRE_MRNA	-0.651237	0.825364
REACTOME_ACTIVATION_OF_BH3_ONLY_PROTEINS	-0.650907	0.948718
REACTOME_RESOLUTION_OF_AP_SITES_VIA_THE_MULTIPLE_NUCLEOTIDE_PATCH_REPLACEMENT_PATHWAY	-0.650264	0.813627
PID_S1P_S1P2_PATHWAY	-0.645853	0.980392
REACTOME_G_PROTEIN_ACTIVATION	-0.645404	0.975807
PID_HDAC_CLASSIII_PATHWAY	-0.641558	0.974206
REACTOME_G_BETA:GAMMA_SIGNALLING_THROUGH_PI3KGAMMA	-0.64154	0.986301
REACTOME_SUMOYLATION_OF_SUMOYLATION_PROTEINS	-0.636604	0.826613
REACTOME_SUMOYLATION_OF_DNA_REPLICATION_PROTEINS	-0.633463	0.825462
BIOCARTA_TEL_PATHWAY	-0.632804	0.95992
REACTOME_TRANSLESION_SYNTHESIS_BY_POLH	-0.632148	0.874494
BIOCARTA_NO1_PATHWAY	-0.631653	1
KEGG_BETA_ALANINE_METABOLISM	-0.624361	0.956088
REACTOME_PCNA_DEPENDENT_LONG_PATCH_BASE_EXCISION_REPAIR	-0.622598	0.843813
REACTOME_TRANSCRIPTION_OF_E2F_TARGETS_UNDER_NEGATIVE_CONTROL_BY_DREAM_COMPLEX	-0.622234	0.92
BIOCARTA_P53_PATHWAY	-0.620184	0.887097
REACTOME_CGMP_EFFECTS	-0.613018	0.981855
REACTOME_SUMOYLATION_OF_RNA_BINDING_PROTEINS	-0.612942	0.88641
REACTOME_MITOTIC_G2_G2_M_PHASES	-0.606577	0.919028
REACTOME_RRNA_PROCESSING	-0.606205	0.903689
REACTOME_REGULATION_OF_KIT_SIGNALING	-0.594635	0.982283
REACTOME_RUNX1_REGULATES_TRANSCRIPTION_OF_GENES_INVOLVED_IN_DIFFERENTIATION_OF_HSCS	-0.594263	0.9625
REACTOME_MRNA_SPLICING	-0.589229	0.905858
REACTOME_MRNA_CAPPING	-0.588353	0.931818
REACTOME_FERTILIZATION	-0.584626	0.997947
REACTOME_PROCESSIVE_SYNTHESIS_ON_THE_LAGGING_STRAND	-0.578036	0.893788
REACTOME_MISMATCH_REPAIR	-0.576618	0.908911
REACTOME_RRNA_PROCESSING_IN_THE_NUCLEUS_AND_CYTOSOL	-0.57363	0.914807
REACTOME_FORMATION_OF_THE_EARLY_ELONGATION_COMPLEX	-0.567384	0.944672
REACTOME_SUMOYLATION_OF_DNA_DAMAGE_RESPONSE_AND_REPAIR_PROTEINS	-0.565839	0.971831
REACTOME_SUMOYLATION_OF_UBIQUITINYLATION_PROTEINS	-0.563774	0.91498
PID_ATR_PATHWAY	-0.561929	0.916327
REACTOME_MRNA_SPLICING_MINOR_PATHWAY	-0.55951	0.921488
REACTOME_FORMATION_OF_HIV_ELONGATION_COMPLEX_IN_THE_ABSENCE_OF_HIV_TAT	-0.5558	0.966527
REACTOME_MRNA_DECAY_BY_5_TO_3_EXORIBONUCLEASE	-0.553767	0.987805
KEGG_SPLICEOSOME	-0.538025	0.960084
REACTOME_G2_M_CHECKPOINTS	-0.511662	0.983871
REACTOME_CYCLIN_A_B1_B2_ASSOCIATED_EVENTS_DURING_G2_M_TRANSITION	-0.494866	0.982036
PID_BARD1_PATHWAY	-0.481192	0.973469
KEGG_DNA_REPLICATION	-0.472578	0.930894
REACTOME_EXTENSION_OF_TELOMERES	-0.470871	0.960986
REACTOME_LAGGING_STRAND_SYNTHESIS	-0.399401	0.988095
REACTOME_TELOMERE_C_STRAND_LAGGING_STRAND_SYNTHESIS	-0.396169	0.98998
REACTOME_DNA_STRAND_ELONGATION	-0.375351	0.983707

## Sheet: Figure 8D
50%	50%
10.3	5
9.8	10.2
9.12	8.07
7.64	8.56
14.2	11.6
16.6	9.87
12	5.18

## Sheet: Figure 8J
WT	1D2	2E7
11.8271	23.8764	32.1401
12.5864	25.3862	36.2406
11.2139	23.6657	32.2963

## Sheet: Figure 8G
	0 nM			250 nM			500 nM			2000 nM
WT	100	100	100	22.5645	32.575	27.5635	5.83001	4.16789	2.97167	1.44806	2.07765	1.25918
KO	100	100	100	36.91	33.69	25.2	15.92	22.77	19.51	9.95	19.51	14.1

## Sheet: Figure 8M
WT	KGA	GAC
3.6	7.75521	19.2728
2.48623	12.2559	13.85
4.43751	14.6179	14.21

## Sheet: Figure 8N
Control	KGA	GAC
26.729	63.9856	48.8411
34.9096	53.9952	46.3012
29.0151	59.4001	47.8314
