# Supplementary material for: Metabolic reprogramming of cancer cells by JMJD6-mediated pre-mRNA splicing associated with therapeutic response to splicing inhibitor
Source: eLife. 2024 Mar 15;12:RP90993. doi: 10.7554/eLife.90993 (PMC10942784; doi:10.7554/eLife.90993)
Supplement: Figure 1—source data 1. [file elife-90993-fig1-data1.xlsx]

## Sheet: Sheet1
Symbol	GoldenPath hg38 (Mb)	Location	Description
AA06	33529.8	17q12	uncharacterized LOC100506677
AANAT	76453.4	17q25.1	aralkylamine N-acetyltransferase
AARSD1	42950.5	17q21.31	alanyl-tRNA synthetase domain containing 1
AATF	36948.9	17q12	apoptosis antagonizing transcription factor
AATK	81117.3	17q25.3	apoptosis associated tyrosine kinase
AATK-AS1	81165.5	17q25.3	AATK antisense RNA 1
ABCA10	69148	17q24.3	ATP binding cassette subfamily A member 10
ABCA5	69244.4	17q24.3	ATP binding cassette subfamily A member 5
ABCA6	69078.7	17q24.2-q24.3	ATP binding cassette subfamily A member 6
ABCA8	68867.3	17q24.2	ATP binding cassette subfamily A member 8
ABCA9	68974.6	17q24.2	ATP binding cassette subfamily A member 9
ABCA9-AS1	69004.7	17q24.2	ABCA9 antisense RNA 1
ABCC3	50634.9	17q21.33	ATP binding cassette subfamily C member 3
ABHD15	29560.7	17q11.2	abhydrolase domain containing 15
ABI3	49210.2	17q21.32	ABI family member 3
ACACA	37085	17q12	acetyl-CoA carboxylase alpha
ACBD4	45135.6	17q21.31	acyl-CoA binding domain containing 4
ACE	63484.8	17q23.3	angiotensin I converting enzyme
ACLY	41866.9	17q21.2	ATP citrate lyase
ACOX1	75941.5	17q25.1	acyl-CoA oxidase 1
ACSF2	50426.2	17q21.33	acyl-CoA synthetase family member 2
ACTG1	81510	17q25.3	actin gamma 1
ADAM11	44759.2	17q21.31	ADAM metallopeptidase domain 11
ADAP2	30921.7	17q11.2	ArfGAP with dual PH domains 2
AFMID	78187.3	17q25.3	arylformamidase
AKAP1	57085.2	17q22	A-kinase anchoring protein 1
ALDOC	28573.1	17q11.2	aldolase, fructose-bisphosphate C
ALYREF	81887.8	17q25.3	Aly/REF export factor
AMZ2	68248	17q24.2	archaelysin family metallopeptidase 2
AMZ2P1	64966.6	17q24.1	archaelysin family metallopeptidase 2 pseudogene 1
ANAPC11	81891.7	17q25.3	anaphase promoting complex subunit 11
ANKFN1	56153.5	17q22	ankyrin repeat and fibronectin type III domain containing 1
ANKRD13B	29593.5	17q11.2	ankyrin repeat domain 13B
ANKRD40	50693.2	17q21.33	ankyrin repeat domain 40
ANKRD40CL	50761	17q21.33	ANKRD40 C-terminal like
AOC2	42844.6	17q21.31	amine oxidase, copper containing 2
AOC3	42851.2	17q21.31	amine oxidase, copper containing 3
AOC4P	42867.1	17q21.31	amine oxidase, copper containing 4, pseudogene
AP2B1	35587.3	17q12	adaptor related protein complex 2 subunit beta 1
APOH	66212	17q24.2	apolipoprotein H
APPBP2	60443.1	17q23.2	amyloid beta precursor protein binding protein 2
ARGFXP2	32150.4	17q11.2	arginine-fifty homeobox pseudogene 2
ARHGAP23	38428.5	17q12	Rho GTPase activating protein 23
ARHGAP27	45393.9	17q21.31	Rho GTPase activating protein 27
ARHGAP27P1	64778.1	17q24.1	Rho GTPase activating protein 27 pseudogene 1
ARHGAP27P1-BPTFP1-KPNA2P3	64749.7	-	ARHGAP27P1-BPTFP1-KPNA2P3 readthrough, transcribed pseudogene
ARHGAP27P2	68198.7	17q24.2	Rho GTPase activating protein 27 pseudogene 2
ARHGDIA	81867.7	17q25.3	Rho GDP dissociation inhibitor alpha
ARL16	81681.2	17q25.3	ADP ribosylation factor like GTPase 16
ARL17A	46334.9	17q21.31	ADP ribosylation factor like GTPase 17A
ARL17B	46285.3	17q21.31	ADP ribosylation factor like GTPase 17B
ARL4D	43399	17q21.31	ADP ribosylation factor like GTPase 4D
ARL5C	39156.9	17q12	ADP ribosylation factor like GTPase 5C
ARMC7	75110	17q25.1	armadillo repeat containing 7
ARSG	68291.5	17q24.2	arylsulfatase G
ASB16	44170.7	17q21.31	ankyrin repeat and SOCS box containing 16
ASB16-AS1	44176	17q21.31	ASB16 antisense RNA 1
ASIC2	33013.1	17q11.2-q12	acid sensing ion channel subunit 2
ASPSCR1	81977.6	17q25.3	ASPSCR1, UBX domain containing tether for SLC2A4
ATAD5	30832	17q11.2	ATPase family, AAA domain containing 5
ATP5G1	48892.8	17q21.32	ATP synthase, H+ transporting, mitochondrial Fo complex subunit C1 (subunit 9)
ATP5H	75038.9	17q25.1	ATP synthase, H+ transporting, mitochondrial Fo complex subunit D
ATP5MC1	48892.8	17q21.32	ATP synthase membrane subunit c locus 1
ATP5PD	75038.9	17q25.1	ATP synthase peripheral stalk subunit d
ATP6V0A1	42458.8	17q21.2	ATPase H+ transporting V0 subunit a1
ATXN7L3	44191.8	17q21.31	ataxin 7 like 3
AXIN2	65528.6	17q24.1	axin 2
B3GNTL1	82942.1	17q25.3	UDP-GlcNAc:betaGal beta-1,3-N-acetylglucosaminyltransferase like 1
B4GALNT2	49133	17q21.32	beta-1,4-N-acetyl-galactosaminyltransferase 2
BAHCC1	81399.7	17q25.3	BAH domain and coiled-coil containing 1
BAIAP2	81035.1	17q25.3	BAI1 associated protein 2
BAIAP2-AS1	81029.7	17q25.3	BAIAP2 antisense RNA 1 (head to head)
BCAS3	60677.8	17q23.2	BCAS3, microtubule associated cell migration factor
BECN1	42810.1	17q21.31	beclin 1
BIRC5	78214.2	17q25.3	baculoviral IAP repeat containing 5
BLMH	30248.2	17q11.2	bleomycin hydrolase
BPTF	67825.7	17q24.2	bromodomain PHD finger transcription factor
BRCA1	43044.3	17q21.31	BRCA1, DNA repair associated
BRIP1	61679.2	17q23.2	BRCA1 interacting protein C-terminal helicase 1
BTBD17	74356.4	17q25.1	BTB domain containing 17
C17orf102	34574.1	17q12	chromosome 17 open reading frame 102
C17orf105	43780.4	17q21.31	chromosome 17 open reading frame 105
C17orf112	52985.5	17q22	chromosome 17 open reading frame 112
C17orf113	42039.7	17q21.2	chromosome 17 open reading frame 113
C17orf47	58541.6	17q22	chromosome 17 open reading frame 47
C17orf50	35760.9	17q12	chromosome 17 open reading frame 50
C17orf53	44141.9	17q21.31	chromosome 17 open reading frame 53
C17orf58	67991.1	17q24.2	chromosome 17 open reading frame 58
C17orf62	82442.6	17q25.3	chromosome 17 open reading frame 62
C17orf64	60422.5	17q23.2	chromosome 17 open reading frame 64
C17orf67	56791.9	17q22	chromosome 17 open reading frame 67
C17orf75	32328.4	17q11.2	chromosome 17 open reading frame 75
C17orf77	74584.7	17q25.1	chromosome 17 open reading frame 77
C17orf78	37376	17q12	chromosome 17 open reading frame 78
C17orf80	73232.6	17q25.1	chromosome 17 open reading frame 80
C17orf82	61411.8	17q23.2	chromosome 17 open reading frame 82
C17orf98	38835.1	17q12	chromosome 17 open reading frame 98
C17orf99	78146.4	17q25.3	chromosome 17 open reading frame 99
C1QL1	44959.7	17q21.31	complement C1q like 1
C1QTNF1	79024.1	17q25.3	C1q and TNF related 1
C1QTNF1-AS1	79019.2	17q25.3	C1QTNF1 antisense RNA 1
CA10	51630.3	17q21.33-q22	carbonic anhydrase 10
CA4	60149.9	17q23.1	carbonic anhydrase 4
CACNA1G	50561.1	17q21.33	calcium voltage-gated channel subunit alpha1 G
CACNA1G-AS1	50556.2	17q21.33	CACNA1G antisense RNA 1
CACNB1	39173.5	17q12	calcium voltage-gated channel auxiliary subunit beta 1
CACNG1	67044.5	17q24.2	calcium voltage-gated channel auxiliary subunit gamma 1
CACNG4	66964.9	17q24.2	calcium voltage-gated channel auxiliary subunit gamma 4
CACNG5	66877.3	17q24.2	calcium voltage-gated channel auxiliary subunit gamma 5
CALCOCO2	48831	17q21.32	calcium binding and coiled-coil domain 2
CANT1	78991.7	17q25.3	calcium activated nucleotidase 1
CARD14	80187.8	17q25.3	caspase recruitment domain family member 14
CASC17	71097.8	17q24.3	cancer susceptibility 17
CASC3	40140.3	17q21.1	CASC3, exon junction complex subunit
CASKIN2	75500.3	17q25.1	CASK interacting protein 2
CAVIN1	42402.4	17q21.2	caveolae associated protein 1
CBX1	48070.1	17q21.32	chromobox 1
CBX2	79778.2	17q25.3	chromobox 2
CBX4	79833.2	17q25.3	chromobox 4
CBX8	79794.4	17q25.3	chromobox 8
CCDC103	44899.7	17q21.31	coiled-coil domain containing 103
CCDC137	81666.7	17q25.3	coiled-coil domain containing 137
CCDC182	57744.5	17q22	coiled-coil domain containing 182
CCDC200	43221.4	17q21.31	coiled-coil domain containing 200
CCDC40	80036.6	17q25.3	coiled-coil domain containing 40
CCDC43	44677.4	17q21.31	coiled-coil domain containing 43
CCDC47	63745.2	17q23.3	coiled-coil domain containing 47
CCDC57	82153.6	17q25.3	coiled-coil domain containing 57
CCL1	34360.3	17q12	C-C motif chemokine ligand 1
CCL11	34285.7	17q12	C-C motif chemokine ligand 11
CCL13	34356.5	17q12	C-C motif chemokine ligand 13
CCL14	35983.7	17q12	C-C motif chemokine ligand 14
CCL15	35997.6	17q12	C-C motif chemokine ligand 15
CCL15-CCL14	35983.7	17q12	CCL15-CCL14 readthrough (NMD candidate)
CCL16	35976.5	17q12	C-C motif chemokine ligand 16
CCL18	36064.3	17q12	C-C motif chemokine ligand 18
CCL2	34255.3	17q12	C-C motif chemokine ligand 2
CCL23	36013.1	17q12	C-C motif chemokine ligand 23
CCL3	36088.3	17q12	C-C motif chemokine ligand 3
CCL3L1	36194.9	17q21.1	C-C motif chemokine ligand 3 like 1
CCL3L3	36194.9	17q12	C-C motif chemokine ligand 3 like 3
CCL4	36103.8	17q12	C-C motif chemokine ligand 4
CCL4L1	36103.7	17q12	C-C motif chemokine ligand 4 like 1
CCL4L2	36103.8	17q12	C-C motif chemokine ligand 4 like 2
CCL5	35871.5	17q12	C-C motif chemokine ligand 5
CCL7	34270.2	17q12	C-C motif chemokine ligand 7
CCL8	34319	17q12	C-C motif chemokine ligand 8
CCR10	42679.4	17q21.2	C-C motif chemokine receptor 10
CCR7	40553.8	17q21.2	C-C motif chemokine receptor 7
CCT6B	34927.9	17q12	chaperonin containing TCP1 subunit 6B
CD300A	74466.4	17q25.1	CD300a molecule
CD300C	74541.1	17q25.1	CD300c molecule
CD300E	74609.9	17q25.1	CD300e molecule
CD300H	74560.7	17q25.1	CD300c molecule-like
CD300LB	74521.2	17q25.1	CD300 molecule like family member b
CD300LD	74580	17q25.1	CD300 molecule like family member d
CD300LF	74694.3	17q25.1	CD300 molecule like family member f
CD300LG	43847.1	17q21.31	CD300 molecule like family member g
CD7	82314.9	17q25.3	CD7 molecule
CD79B	63928.7	17q23.3	CD79b molecule
CDC27	47117.7	17q21.32	cell division cycle 27
CDC42EP4	73283.6	17q25.1	CDC42 effector protein 4
CDC6	40287.9	17q21.2	cell division cycle 6
CDK12	39461.5	17q12	cyclin dependent kinase 12
CDK3	76000.9	17q25.1	cyclin dependent kinase 3
CDK5R1	32487.1	17q11.2	cyclin dependent kinase 5 regulatory subunit 1
CDK5RAP3	47971	17q21.32	CDK5 regulatory subunit associated protein 3
CDR2L	74987.6	17q25.1	cerebellar degeneration related protein 2 like
CENPX	82018.7	17q25.3	centromere protein X
CEP112	65635.5	17q24.1	centrosomal protein 112
CEP131	81189.6	17q25.3	centrosomal protein 131
CEP295NL	78890.6	17q25.3	CEP295 N-terminal like
CEP95	64506.7	17q23.3	centrosomal protein 95
CFAP97D1	43780.4	17q21.31	CFAP97 domain containing 1
CHAD	50464.5	17q21.33	chondroadherin
CHMP6	80991.8	17q25.3	charged multivesicular body protein 6
CISD3	38730.3	17q12	CDGSH iron sulfur domain 3
CLTC	59619.7	17q23.1	clathrin heavy chain
CNP	41966.7	17q21.2	2',3'-cyclic nucleotide 3' phosphodiesterase
CNTD1	42798.9	17q21.2-q21.31	cyclin N-terminal domain containing 1
CNTNAP1	42682.6	17q21.2	contactin associated protein 1
COA3	42797.6	17q21.2	cytochrome c oxidase assembly factor 3
COASY	42562.1	17q21.2	Coenzyme A synthase
COG1	73193	17q25.1	component of oligomeric golgi complex 1
COIL	56938.2	17q22	coilin
COL1A1	50184.1	17q21.33	collagen type I alpha 1 chain
COPRS	31851.9	17q11.2	coordinator of PRMT5 and differentiation stimulator
COPZ2	48026.2	17q21.32	coatomer protein complex subunit zeta 2
CORO6	29614.8	17q11.2	coronin 6
COX11	54961.2	17q22	cytochrome c oxidase copper chaperone COX11
CPD	30378.9	17q11.2	carboxypeptidase D
CPSF4L	73248.4	17q25.1	cleavage and polyadenylation specific factor 4 like
CRHR1	45784.3	17q21.31	corticotropin releasing hormone receptor 1
CRLF3	30782.7	17q11.2	cytokine receptor like factor 3
CRYBA1	29246.9	17q11.2	crystallin beta A1
CSF3	40015.4	17q21.1	colony stimulating factor 3
CSH1	63894.9	17q23.3	chorionic somatomammotropin hormone 1
CSH2	63872	17q23.3	chorionic somatomammotropin hormone 2
CSHL1	63909.6	17q23.3	chorionic somatomammotropin hormone like 1
CSNK1D	82242.7	17q25.3	casein kinase 1 delta
CUEDC1	57861.2	17q22	CUE domain containing 1
CWC25	38800.4	17q12	CWC25 spliceosome associated protein homolog
CYB561	63432.3	17q23.3	cytochrome b561
CYBC1	82442.6	17q25.3	cytochrome b-245 chaperone 1
CYGB	76527.3	17q25.1	cytoglobin
CYTH1	78674	17q25.3	cytohesin 1
DBF4B	44708.6	17q21.31|17q21	DBF4 zinc finger B
DCAF7	63550.4	17q23.3	DDB1 and CUL4 associated factor 7
DCAKD	45023.3	17q21.31	dephospho-CoA kinase domain containing
DCXR	82035.9	17q25.3	dicarbonyl and L-xylulose reductase
DDX42	63774.2	17q23.3	DEAD-box helicase 42
DDX5	64498.3	17q23.3	DEAD-box helicase 5
DDX52	37609.7	17q12	DExD-box helicase 52
DGKE	56834.1	17q22	diacylglycerol kinase epsilon
DHRS11	36591.8	17q12	dehydrogenase/reductase 11
DHRS13	28897.8	17q11.2	dehydrogenase/reductase 13
DHX40	59565.5	17q23.1	DEAH-box helicase 40
DHX58	42101.4	17q21.2	DExH-box helicase 58
DHX8	43483.9	17q21.31	DEAH-box helicase 8
DLX3	49990	17q21.33	distal-less homeobox 3
DLX4	49969.2	17q21.33	distal-less homeobox 4
DNAH17	78423.7	17q25.3	dynein axonemal heavy chain 17
DNAH17-AS1	78484.9	17q25.3	DNAH17 antisense RNA 1
DNAI2	74274.2	17q25.1	dynein axonemal intermediate chain 2
DNAJC7	41976.4	17q21.2	DnaJ heat shock protein family (Hsp40) member C7
DPRXP4	30975.3	17q11.2	divergent-paired related homeobox pseudogene 4
DUS1L	82057.9	17q25.3	dihydrouridine synthase 1 like
DUSP14	37489.8	17q12	dual specificity phosphatase 14
DUSP3	43766.1	17q21.31	dual specificity phosphatase 3
DYNLL2	58083.4	17q22	dynein light chain LC8-type 2
EFCAB13	47324	17q21.32	EF-hand calcium binding domain 13
EFCAB3	62370.2	17q23.2	EF-hand calcium binding domain 3
EFCAB5	29941.6	17q11.2	EF-hand calcium binding domain 5
EFTUD2	44850.3	17q21.31	elongation factor Tu GTP binding domain containing 2
EIF1	41688.9	17q21.2	eukaryotic translation initiation factor 1
EIF4A3	80135.2	17q25.3	eukaryotic translation initiation factor 4A3
EME1	50373.2	17q21.33	essential meiotic structure-specific endonuclease 1
ENDOV	80415.2	17q25.3	endonuclease V
ENGASE	79074.9	17q25.3	endo-beta-N-acetylglucosaminidase
ENPP7	79731.1	17q25.3	ectonucleotide pyrophosphatase/phosphodiesterase 7
EPN3	50532.7	17q21.33	epsin 3
EPOP	38671.7	17q12	elongin BC and polycomb repressive complex 2 associated protein
EPX	58192.7	17q22	eosinophil peroxidase
ERAL1	28855	17q11.2	Era like 12S mitochondrial rRNA chaperone 1
ERBB2	39700	17q12	erb-b2 receptor tyrosine kinase 2
ERN1	64039.1	17q23.3	endoplasmic reticulum to nucleus signaling 1
ETV4	43527.8	17q21.31	ETS variant 4
EVI2A	31316.4	17q11.2	ecotropic viral integration site 2A
EVI2B	31303.8	17q11.2	ecotropic viral integration site 2B
EVPL	76006.8	17q25.1	envoplakin
EXOC7	76081	17q25.1	exocyst complex component 7
EZH1	42700.3	17q21.2	enhancer of zeste 1 polycomb repressive complex 2 subunit
FAAP100	81539.9	17q25.3	FA core complex associated protein 100
FADS6	74877.3	17q25.1	fatty acid desaturase 6
FAM104A	73207.4	17q25.1	family with sequence similarity 104 member A
FAM117A	49710.3	17q21.33	family with sequence similarity 117 member A
FAM171A2	44353.7	17q21.31	family with sequence similarity 171 member A2
FAM187A	44899.8	17q21.31	family with sequence similarity 187 member A
FAM20A	68535.1	17q24.2	FAM20A, golgi associated secretory pathway pseudokinase
FAM215A	43917.2	17q21.31	family with sequence similarity 215 member A (non-protein coding)
FAM222B	28756	17q11.2	family with sequence similarity 222 member B
FASN	82078.3	17q25.3	fatty acid synthase
FBF1	75909.6	17q25.1	Fas binding factor 1
FBXL20	39252.6	17q12	F-box and leucine rich repeat protein 20
FBXO47	38936.4	17q12|17q12	F-box protein 47
FDXR	74862.5	17q25.1	ferredoxin reductase
FKBP10	41812.7	17q21.2	FKBP prolyl isomerase 10
FLJ40194	49248.2	17q21.32	uncharacterized FLJ40194
FLJ45513	49845.9	17q21.33	uncharacterized LOC729220
FLOT2	28879.3	17q11.2	flotillin 2
FMNL1	45221.9	17q21.31	formin like 1
FN3K	82735.6	17q25.3	fructosamine 3 kinase
FN3KRP	82716.7	17q25.3	fructosamine 3 kinase related protein
FNDC8	35121.6	17q12	fibronectin type III domain containing 8
FOXJ1	76136.3	17q25.1	forkhead box J1
FOXK2	82519.7	17q25.3	forkhead box K2
FOXN1	28523.9	17q11.2	forkhead box N1
FSCN2	81528.4	17q25.3	fascin actin-bundling protein 2, retinal
FTSJ3	63819.4	17q23.3	FtsJ homolog 3
FZD2	44557.4	17q21.31	frizzled class receptor 2
G6PC	42900.8	17q21.31	glucose-6-phosphatase catalytic subunit
G6PC3	44070.7	17q21.31	glucose-6-phosphatase catalytic subunit 3
GAA	80101.5	17q25.3	glucosidase alpha, acid
GALK1	75757.9	17q25.1	galactokinase 1
GALR2	76074.8	17q25.1	galanin receptor 2
GAS2L2	35744.5	17q12	growth arrest specific 2 like 2
GAST	41712.3	17q21.2	gastrin
GCGR	81804.1	17q25.3	glucagon receptor
GDPD1	59220.5	17q22	glycerophosphodiester phosphodiesterase domain containing 1
GFAP	44905.6	17q21.31	glial fibrillary acidic protein
GGA3	75236.6	17q25.1	golgi associated, gamma adaptin ear containing, ARF binding protein 3
GGNBP2	36544.9	17q12	gametogenetin binding protein 2
GH1	63917.2	17q23.3	growth hormone 1
GH2	63880.2	17q23.3	growth hormone 2
GHDC	42189.1	17q21.2	GH3 domain containing
GIP	48958.6	17q21.32	gastric inhibitory polypeptide
GIT1	29573.5	17q11.2	GIT ArfGAP 1
GJC1	44798.4	17q21.31	gap junction protein gamma 1
GJD3	40360.7	17q21.2	gap junction protein delta 3
GNA13	65009.3	17q24.1	G protein subunit alpha 13
GNGT2	49206.2	17q21.32	G protein subunit gamma transducin 2
GOSR1	30477.4	17q11.2	golgi SNAP receptor complex member 1
GOSR2	46923.1	17q21.32	golgi SNAP receptor complex member 2
GPATCH8	44395.3	17q21.31	G-patch domain containing 8
GPR142	74367.5	17q25.1	G protein-coupled receptor 142
GPR179	38325.6	17q12	G protein-coupled receptor 179
GPRC5C	74431.5	17q25.1	G protein-coupled receptor class C group 5 member C
GPS1	82051.9	17q25.3	G protein pathway suppressor 1
GRB2	75318.1	17q25.1	growth factor receptor bound protein 2
GRB7	39737.9	17q12	growth factor receptor bound protein 7
GRIN2C	74842	17q25.1	glutamate ionotropic receptor NMDA type subunit 2C
GRN	44345.1	17q21.31	granulin precursor
GSDMA	39963	17q21.1	gasdermin A
GSDMB	39904.6	17q21.1	gasdermin B
H3F3B	75776.4	17q25.1	H3 histone family member 3B
HAP1	41722.6	17q21.2	huntingtin associated protein 1
HCRT	42184.1	17q21.2	hypocretin neuropeptide precursor
HDAC5	44076.8	17q21.31	histone deacetylase 5
HEATR6	60043.2	17q23.1	HEAT repeat containing 6
HEATR9	35854.9	17q12	HEAT repeat containing 9
HELZ	67070.4	17q24.2	helicase with zinc finger
HEXDC-IT1	82425.5	17q25.3	HEXDC intronic transcript 1
HEXIM1	45147.3	17q21.31	HEXIM P-TEFb complex subunit 1
HEXIM2	45160.2	17q21.31	HEXIM P-TEFb complex subunit 2
HGS	81683.9	17q25.3	hepatocyte growth factor-regulated tyrosine kinase substrate
HID1	74950.7	17q25.1	HID1 domain containing
HID1-AS1	74970.7	17q25.1	HID1 antisense RNA 1
HIGD1B	44846.4	17q21.31	HIG1 hypoxia inducible domain family member 1B
HILS1	50171.4	17q21.33	histone linker H1 domain, spermatid-specific 1 (pseudogene)
HLF	55265	17q22	HLF, PAR bZIP transcription factor
HNF1B	37686.4	17q12	HNF1 homeobox B
HOXB-AS1	48544.4	17q21.32	HOXB cluster antisense RNA 1
HOXB-AS3	48590.4	17q21.32	HOXB cluster antisense RNA 3
HOXB1	48529.4	17q21.32	homeobox B1
HOXB13	48724.8	17q21.32	homeobox B13
HOXB2	48542.7	17q21.32	homeobox B2
HOXB3	48548.9	17q21.32	homeobox B3
HOXB4	48575.5	17q21.32	homeobox B4
HOXB5	48591.3	17q21.32	homeobox B5
HOXB6	48595.7	17q21.32	homeobox B6
HOXB7	48607.2	17q21.32	homeobox B7
HOXB8	48612.3	17q21.32	homeobox B8
HOXB9	48621.2	17q21.32	homeobox B9
HSD17B1	42552.6	17q21.2	hydroxysteroid 17-beta dehydrogenase 1
HSF5	58420.2	17q22	heat shock transcription factor 5
HSPB9	42122.7	17q21.2	heat shock protein family B (small) member 9
ICAM2	64002.6	17q23.3	intercellular adhesion molecule 2
IFI35	43006.7	17q21.31	interferon induced protein 35
IFT20	28328.3	17q11.2	intraflagellar transport 20
IGF2BP1	48997.4	17q21.32	insulin like growth factor 2 mRNA binding protein 1
IGFBP4	40443.4	17q21.2	insulin like growth factor binding protein 4
IKZF3	39757.7	17q12-q21.1	IKAROS family zinc finger 3
INTS2	61865.4	17q23.2	integrator complex subunit 2
ITGA2B	44372.2	17q21.31	integrin subunit alpha 2b
ITGA3	50056	17q21.33	integrin subunit alpha 3
ITGB3	47253.8	17q21.32	integrin subunit beta 3
ITGB4	75721.3	17q25.1	integrin subunit beta 4
JMJD6	76718.4	17q25.1	jumonji domain containing 6, arginine demethylase and lysine hydroxylase
JPT1	75135.2	17q25.1	Jupiter microtubule associated homolog 1
JUP	41754.6	17q21.2	junction plakoglobin
KANSL1	46029.9	17q21.31	KAT8 regulatory NSL complex subunit 1
KANSL1-AS1	46193.6	17q21.31	KANSL1 antisense RNA 1
KAT2A	42113.1	17q21.2	lysine acetyltransferase 2A
KAT7	49788.6	17q21.33	lysine acetyltransferase 7
KCNH4	42156.9	17q21.2	potassium voltage-gated channel subfamily H member 4
KCNH6	63523.3	17q23.3	potassium voltage-gated channel subfamily H member 6
KCNJ16	70104.8	17q24.3	potassium voltage-gated channel subfamily J member 16
KCNJ2	70169.5	17q24.3	potassium voltage-gated channel subfamily J member 2
KCNJ2-AS1	70167	17q24.3	KCNJ2 antisense RNA 1 (head to head)
KCTD2	75047.2	17q25.1	potassium channel tetramerization domain containing 2
KIAA0100	28614.4	17q11.2	KIAA0100
KIF18B	44924.7	17q21.31	kinesin family member 18B
KIF19	74326.2	17q25.1	kinesin family member 19
KIF2B	53822.9	17q22	kinesin family member 2B
KLHL10	41835.7	17q21.2	kelch like family member 10
KLHL11	41848.5	17q21.2	kelch like family member 11
KPNA2	68035.6	17q24.2	karyopherin subunit alpha 2
KPNB1	47649.8	17q21.32	karyopherin subunit beta 1
KRT10	40818.1	17q21.2	keratin 10
KRT12	40861.2	17q21.2	keratin 12
KRT13	41501	17q21.2	keratin 13
KRT14	41582.3	17q21.2	keratin 14
KRT15	41513.7	17q21.2	keratin 15
KRT16	41609.8	17q21.2	keratin 16
KRT17	41619.4	17q21.2	keratin 17
KRT18P55	28276	17q11.2	keratin 18 pseudogene 55
KRT19	41523.6	17q21.2	keratin 19
KRT20	40875.9	17q21.2	keratin 20
KRT222	40655.6	17q21.2	keratin 222
KRT23	40922.7	17q21.2	keratin 23
KRT24	40698	17q21.2	keratin 24
KRT25	40748	17q21.2	keratin 25
KRT26	40766.2	17q21.2	keratin 26
KRT27	40776.8	17q21.2	keratin 27
KRT28	40792.2	17q21.2	keratin 28
KRT31	41393.7	17q21.2	keratin 31
KRT32	41459.5	17q21.2	keratin 32
KRT33A	41346.1	17q21.2	keratin 33A
KRT33B	41363.5	17q21.2	keratin 33B
KRT34	41377.7	17q21.2	keratin 34
KRT35	41476.7	17q21.2	keratin 35
KRT36	41486.1	17q21.2	keratin 36
KRT37	41420.6	17q21.2	keratin 37
KRT38	41436.4	17q21.2	keratin 38
KRT39	40958.4	17q21.2	keratin 39
KRT40	40977.7	17q21.2	keratin 40
KRT42P	41626.3	17q21.2	keratin 42 pseudogene
KRT9	41565.8	17q21.2	keratin 9
KRTAP1-1	41040.6	17q21.2	keratin associated protein 1-1
KRTAP1-3	41033.9	17q21.2	keratin associated protein 1-3
KRTAP1-4	41029.7	17q21.2	keratin associated protein 1-4
KRTAP1-5	41026	17q21.2	keratin associated protein 1-5
KRTAP16-1	41307.7	17q21.2	keratin associated protein 16-1
KRTAP17-1	41314.9	17q21.2	keratin associated protein 17-1
KRTAP2-1	41046.5	17q21.2	keratin associated protein 2-1
KRTAP2-2	41054.5	17q21.2	keratin associated protein 2-2
KRTAP2-3	41059.2	17q21.2	keratin associated protein 2-3
KRTAP2-4	41065.1	17q21.2	keratin associated protein 2-4
KRTAP29-1	41301.8	17q21.2	keratin associated protein 29-1
KRTAP3-1	41008.5	17q21.2	keratin associated protein 3-1
KRTAP3-2	40999.2	17q21.2	keratin associated protein 3-2
KRTAP3-3	40993.4	17q21.2	keratin associated protein 3-3
KRTAP4-1	41184.1	17q21.2	keratin associated protein 4-1
KRTAP4-11	41117.2	17q21.2	keratin associated protein 4-11
KRTAP4-12	41123.1	17q21.2	keratin associated protein 4-12
KRTAP4-2	41177.4	17q21.2	keratin associated protein 4-2
KRTAP4-3	41167.2	17q21.2	keratin associated protein 4-3
KRTAP4-4	41159.7	17q21.2	keratin associated protein 4-4
KRTAP4-5	41148.9	17q21.2	keratin associated protein 4-5
KRTAP4-6	41139.4	17q21.2	keratin associated protein 4-6
KRTAP4-7	41084.2	17q21.2	keratin associated protein 4-7
KRTAP4-8	41097	17q21.2	keratin associated protein 4-8
KRTAP4-9	41105.4	17q21.2	keratin associated protein 4-9
KRTAP9-1	41189.9	17q21.2	keratin associated protein 9-1
KRTAP9-2	41226.6	17q21.2	keratin associated protein 9-2
KRTAP9-3	41232.5	17q21.2	keratin associated protein 9-3
KRTAP9-4	41249.7	17q21.2	keratin associated protein 9-4
KRTAP9-6	41265.4	17q21.2	keratin associated protein 9-6
KRTAP9-7	41041.3	17q21.2	keratin associated protein 9-7
KRTAP9-8	41238	17q21.2	keratin associated protein 9-8
KRTAP9-9	41232.5	17q21.2	keratin associated protein 9-9
KSR1	27472	17q11.2	kinase suppressor of ras 1
LASP1	38869.9	17q12	LIM and SH3 protein 1
LGALS3BP	78971.3	17q25.3	galectin 3 binding protein
LGALS9	27631.1	17q11.2	galectin 9
LHX1	36937.5	17q12	LIM homeobox 1
LHX1-DT	36861.7	17q12	LHX1 divergent transcript
LIG3	34980.5	17q12	DNA ligase 3
LIMD2	63695.9	17q23.3	LIM domain containing 2
LINC00469	73749.3	17q25.1	long intergenic non-protein coding RNA 469
LINC00482	81302.8	17q25.3	long intergenic non-protein coding RNA 482
LINC00483	50757.4	17q21.33	long intergenic non-protein coding RNA 483
LINC00511	72598	17q24.3	long intergenic non-protein coding RNA 511
LINC00671	42874.7	17q21.31	long intergenic non-protein coding RNA 671
LINC00672	38925.2	17q12	long intergenic non-protein coding RNA 672
LINC00673	72403.3	17q24.3	long intergenic non-protein coding RNA 673
LINC00674	68101.6	17q24.2	long intergenic non-protein coding RNA 674
LINC00854	43221.4	17q21.31	long intergenic non-protein coding RNA 854
LINC00868	76856.2	17q25.2	long intergenic non-protein coding RNA 868
LINC00910	43369.8	17q21.31	long intergenic non-protein coding RNA 910
LINC00974	41549.6	17q21.2	long intergenic non-protein coding RNA 974
LINC01028	70051.3	17q24.3	long intergenic non-protein coding RNA 1028
LINC01152	72030.7	17q24.3	long intergenic non-protein coding RNA 1152
LINC01180	44646.4	17q21.31	long intergenic non-protein coding RNA 1180
LINC01476	59430.9	17q22-q23.1	long intergenic non-protein coding RNA 1476
LINC01482	68628.2	17q24.2	long intergenic non-protein coding RNA 1482
LINC01483	69594	17q24.3	long intergenic non-protein coding RNA 1483
LINC01497	69961.7	17q24.3	long intergenic non-protein coding RNA 1497
LINC01969	50214.7	17q21.33	long intergenic non-protein coding RNA 1969
LINC01970	82290	17q25.3	long intergenic non-protein coding RNA 1970
LINC01973	77879	17q25.3	long intergenic non-protein coding RNA 1973
LINC01976	43938.3	17q21.31	long intergenic non-protein coding RNA 1976
LINC01977	79823.5	17q25.3	long intergenic non-protein coding RNA 1977
LINC01978	79919.4	17q25.3	long intergenic non-protein coding RNA 1978
LINC01979	79915.3	17q25.3	long intergenic non-protein coding RNA 1979
LINC01982	52390.5	17q22	long intergenic non-protein coding RNA 1982
LINC01987	77722.9	17q25.3	long intergenic non-protein coding RNA 1987
LINC01989	34169.4	17q12	long intergenic non-protein coding RNA 1989
LINC01992	27928.9	17q11.2	long intergenic non-protein coding RNA 1992
LINC01993	78261.3	17q25.3	long intergenic non-protein coding RNA 1993
LINC01999	60564.5	17q23.2	long intergenic non-protein coding RNA 1999
LINC02001	35568.1	17q12	long intergenic non-protein coding RNA 2001
LINC02003	72342.8	17q24.3	long intergenic non-protein coding RNA 2003
LINC02071	51312.6	17q21.33	long intergenic non-protein coding RNA 2071
LINC02072	51336.7	17q21.33	long intergenic non-protein coding RNA 2072
LINC02073	51435.4	17q21.33	long intergenic non-protein coding RNA 2073
LINC02075	49457.9	17q21.33	long intergenic non-protein coding RNA 2075
LINC02078	79707.3	17q25.3	long intergenic non-protein coding RNA 2078
LINC02079	39026.7	17q12	long intergenic non-protein coding RNA 2079
LINC02080	76799	17q25.1-q25.2	long intergenic non-protein coding RNA 2080
LINC02081	78617.4	17q25.3	long intergenic non-protein coding RNA 2081
LINC02086	48705.2	17q21.32	long intergenic non-protein coding RNA 2086
LINC02089	52862.1	17q22	long intergenic non-protein coding RNA 2089
LINC02092	73786.8	17q25.1	long intergenic non-protein coding RNA 2092
LINC02095	72021.9	17q24.3	long intergenic non-protein coding RNA 2095
LINC02097	72072.3	17q24.3	long intergenic non-protein coding RNA 2097
LINC02210-CRHR1	45620.3	17q21.31	LINC02210-CRHR1 readthrough
LINC02563	65457.5	17q24.1	long intergenic non-protein coding RNA 2563
LLGL2	75525.7	17q25.1	LLGL scribble cell polarity complex component 2
LOC100129503	81003.3	17q25.3	uncharacterized LOC100129503
LOC100130370	81375.4	17q25.3	uncharacterized LOC100130370
LOC100130520	74560.7	17q25.1	CD300c molecule-like
LOC100131170	81110.5	17q25.3	uncharacterized LOC100131170
LOC100131347	39057	17q12	RAD52 motif containing 1 pseudogene
LOC100134391	73737.9	17q25.1	uncharacterized LOC100134391
LOC100287042	75271.3	17q25.1	uncharacterized LOC100287042
LOC100287590	40648.5	17q21.2	uncharacterized LOC100287590
LOC100288866	49505.7	17q21.33	uncharacterized LOC100288866
LOC100294362	80351.8	17q25.3	uncharacterized LOC100294362
LOC100505782	41402.4	17q21.2	uncharacterized LOC100505782
LOC100507002	65100.8	17q24.1	uncharacterized LOC100507002
LOC100507191	75818.8	17q25.1	uncharacterized LOC100507191
LOC100507351	77546.9	17q25.3	uncharacterized LOC100507351
LOC100996660	60134.6	17q23.1	uncharacterized LOC100996660
LOC101926967	44221.9	17q21.31	uncharacterized LOC101926967
LOC101926984	28263.6	17q11.2	leucine-rich repeat-containing protein 37A3
LOC101927018	28926.3	17q11.2	uncharacterized LOC101927018
LOC101927166	48444.8	17q21.32	uncharacterized LOC101927166
LOC101927253	50627	17q21.33	uncharacterized LOC101927253
LOC101927539	57600.9	17q22	uncharacterized LOC101927539
LOC101927557	57522.2	17q22	uncharacterized LOC101927557
LOC101927666	58076.9	17q22	uncharacterized LOC101927666
LOC101927755	59965.1	17q23.1	uncharacterized LOC101927755
LOC101927855	61361.7	17q23.2	uncharacterized LOC101927855
LOC101927877	62808.5	17q23.2	uncharacterized LOC101927877
LOC101928021	67244.8	17q24.2	uncharacterized LOC101928021
LOC101928045	67675.2	17q24.2	uncharacterized LOC101928045
LOC101928251	73513.7	17q25.1	uncharacterized LOC101928251
LOC101928343	74603.7	17q25.1	uncharacterized LOC101928343
LOC101928674	78360.4	17q25.3	uncharacterized LOC101928674
LOC101928855	80801.6	17q25.3	uncharacterized LOC101928855
LOC101929185	57988.2	17q22	uncharacterized LOC101929185
LOC101929552	82713.9	17q25.3	uncharacterized LOC101929552
LOC101929767	43148.4	17q21.31	uncharacterized LOC101929767
LOC102723471	36932.1	17q12	uncharacterized LOC102723471
LOC102723517	72034.1	17q24.3	uncharacterized LOC102723517
LOC102724532	47891.2	17q21.32	uncharacterized LOC102724532
LOC102724596	49362.4	17q21.33	uncharacterized LOC102724596
LOC105274304	76671.9	17q25.1	uncharacterized LOC105274304
LOC105371703	27072.4	17q11.1	uncharacterized LOC105371703
LOC105371712	28246.5	17q11.2	uncharacterized LOC105371712
LOC105371730	32141.2	17q11.2	uncharacterized LOC105371730
LOC105371775	40690.7	17q21.2	uncharacterized LOC105371775
LOC105371789	44115.9	17q21.31	uncharacterized LOC105371789
LOC105371795	45168.8	17q21.31	uncharacterized LOC105371795
LOC105371814	48874.9	17q21.32	uncharacterized LOC105371814
LOC105371824	50537.3	17q21.33	uncharacterized LOC105371824
LOC105371849	60079.3	17q23.1	uncharacterized LOC105371849
LOC105371880	69475.3	17q24.3	uncharacterized LOC105371880
LOC105371899	76962.7	17q25.2	uncharacterized LOC105371899
LOC105371907	77273.8	17q25.3	uncharacterized LOC105371907
LOC105371925	81228.7	17q25.3	uncharacterized LOC105371925
LOC105371934	40317.4	17q21.2	uncharacterized LOC105371934
LOC107133515	30576.5	17q11.2	SMURF2P1-LRRC37BP1 readthrough transcribed pseudogene
LOC107984974	31008.3	17q11.2	uncharacterized LOC107984974
LOC107985033	35553.2	17q12	uncharacterized LOC107985033
LOC147004	33534.1	17q12	uncharacterized LOC147004
LOC284108	39165.1	17q21.2	uncharacterized LOC284108
LOC339192	45218.3	17q21.31	uncharacterized LOC339192
LOC400622	77528.1	17q25.3	uncharacterized LOC400622
LOC400627	80968.2	17q25.3	uncharacterized LOC400627
LOC440434	36274.2	17q12	aminopeptidase puromycin sensitive pseudogene
LOC440461	68198.7	17q24.2	Rho GTPase activating protein 27 pseudogene
LOC646030	31034.7	17q11.2	leucine rich repeat containing 37B pseudogene
LOC653653	60101.8	17q23.1	adaptor related protein complex 1 sigma 2 subunit pseudogene
LOC729683	63700.3	17q23.3	uncharacterized LOC729683
LPO	58238.4	17q22	lactoperoxidase
LRRC37A	46295.1	17q21.31	leucine rich repeat containing 37A
LRRC37A11P	39029.9	17q12	leucine rich repeat containing 37 member A11, pseudogene
LRRC37A2	46512.7	17q21.31	leucine rich repeat containing 37 member A2
LRRC37A3	64854.3	17q24.1	leucine rich repeat containing 37 member A3
LRRC37A8P	35904.2	17q12	leucine rich repeat containing 37 member A8, pseudogene
LRRC37B	32021.1	17q11.2	leucine rich repeat containing 37B
LRRC37BP1	30632.5	17q11.2	leucine rich repeat containing 37B pseudogene 1
LRRC3C	39941.5	17q21.1	leucine rich repeat containing 3C
LRRC45	82023.3	17q25.3	leucine rich repeat containing 45
LRRC46	47831.6	17q21.32	leucine rich repeat containing 46
LRRC59	50381.2	17q21.33	leucine rich repeat containing 59
LSM12	44034.6	17q21.31	LSM12 homolog
LUC7L3	50719.5	17q21.33	LUC7 like 3 pre-mRNA splicing factor
LYRM9	27878.3	17q11.2	LYR motif containing 9
LYZL6	35934.5	17q12	lysozyme like 6
MAFG	81918.3	17q25.3	MAF bZIP transcription factor G
MAFG-AS1	81927.8	17q25.3	MAFG antisense RNA 1 (head to head)
MAFG-DT	81927.8	17q25.3	MAFG divergent transcript
MAP2K6	69414.7	17q24.3	mitogen-activated protein kinase kinase 6
MAP3K14	45263.1	17q21.31	mitogen-activated protein kinase kinase kinase 14
MAP3K14-AS1	45247.9	17q21.31	MAP3K14 antisense RNA 1
MAP3K3	63622.4	17q23.3	mitogen-activated protein kinase kinase kinase 3
MAPK8IP1P2	45600.1	17q21.31	mitogen-activated protein kinase 8 interacting protein 1 pseudogene 2
MAPT	45894.4	17q21.31	microtubule associated protein tau
MAPT-AS1	45843.4	17q21.31	MAPT antisense RNA 1
MAPT-IT1	45895.8	17q21.31	MAPT intronic transcript 1
MARCH10	62701.3	17q23.2	membrane associated ring-CH-type finger 10
MBTD1	51177.4	17q21.33	mbt domain containing 1
MCRIP1	81822.4	17q25.3	MAPK regulated corepressor interacting protein 1
MED1	39404.3	17q12	mediator complex subunit 1
MED13	61942.6	17q23.2	mediator complex subunit 13
MED24	40019.1	17q21.1	mediator complex subunit 24
MEIOC	44656.4	17q21.31	meiosis specific with coiled-coil domain
MEOX1	43640.4	17q21.31	mesenchyme homeobox 1
METRNL	83079.7	17q25.3	meteorin like, glial cell differentiation regulator
METTL23	76726.8	17q25.1	methyltransferase like 23
METTL2A	62423.9	17q23.2	methyltransferase like 2A
MFSD11	76737.5	17q25.1-q25.2	major facilitator superfamily domain containing 11
MGAT5B	76872.6	17q25.2	alpha-1,6-mannosylglycoprotein 6-beta-N-acetylglucosaminyltransferase B
MGC16275	74210	17q25.1	uncharacterized protein MGC16275
MIEN1	39728.5	17q12	migration and invasion enhancer 1
MIF4GD	75266.2	17q25.1	MIF4G domain containing
MILR1	64449.1	17q23.3	mast cell immunoglobulin like receptor 1
MIR10A	48579.8	17q21.32	microRNA 10a
MIR1203	48156.4	17q21.32	microRNA 1203
MIR1250	81133.2	17q25.3	microRNA 1250
MIR1268B	80098.8	17q25.3	microRNA 1268b
MIR1273E	64425.1	17q23.3	microRNA 1273e
MIR142	58331.2	17q22	microRNA 142
MIR144	28861.5	17q11.2	microRNA 144
MIR152	48037.2	17q21.32	microRNA 152
MIR193A	31560	17q11.2	microRNA 193a
MIR196A1	48632.5	17q21.32	microRNA 196a-1
MIR21	59841.3	17q23.1	microRNA 21
MIR2117	43444.8	17q21.31	microRNA 2117
MIR2117HG	43444.7	-	MIR2117 host gene
MIR2909	37033.7	17q12	microRNA 2909
MIR301A	59151.1	17q22	microRNA 301a
MIR3064	64500.8	17q23.3	microRNA 3064
MIR3065	81125.9	17q25.3	microRNA 3065
MIR3184	30117.1	17q11.2	microRNA 3184
MIR3185	48724.4	17q21.32	microRNA 3185
MIR3186	81451.1	17q25.3	microRNA 3186
MIR338	81125.9	17q25.3	microRNA 338
MIR3614	56891.3	17q22	microRNA 3614
MIR3615	74748.6	17q25.1	microRNA 3615
MIR365B	31575.4	17q11.2	microRNA 365b
MIR3678	75406.1	17q25.1	microRNA 3678
MIR378J	37614.9	17q12	microRNA 378j
MIR423	30117.1	17q11.2	microRNA 423
MIR4315-1	45475.4	17q21.31	microRNA 4315-1
MIR4315-2	45475.4	17q24.1	microRNA 4315-2
MIR4316	77397	17q25.3	microRNA 4316
MIR451A	28861.4	17q11.2	microRNA 451a
MIR451B	28861.4	17q11.2	microRNA 451b
MIR4522	27293.9	17q11.1	microRNA 4522
MIR4523	29390.7	17q11.2	microRNA 4523
MIR4524A	69099.6	17q24.2	microRNA 4524a
MIR4524B	69099.5	17q24.2	microRNA 4524b
MIR4525	82668.2	17q25.3	microRNA 4525
MIR454	59137.8	17q22	microRNA 454
MIR4723	28360.7	17q11.2	microRNA 4723
MIR4724	31534.9	17q11.2	microRNA 4724
MIR4725	31575.3	17q11.2	microRNA 4725
MIR4726	38719.7	17q12	microRNA 4726
MIR4727	38825.8	17q12	microRNA 4727
MIR4728	39726.5	17q12	microRNA 4728
MIR4729	59366.1	17q22	microRNA 4729
MIR4730	80419.4	17q25.3	microRNA 4730
MIR4732	28861.7	17q11.2	microRNA 4732
MIR4733	31094.3	17q11.2	microRNA 4733
MIR4734	38702.3	17q12	microRNA 4734
MIR4736	58336	17q22	microRNA 4736
MIR4737	60043	17q23.1	microRNA 4737
MIR4738	75784.5	17q25.1	microRNA 4738
MIR4739	79707.2	17q25.3	microRNA 4739
MIR4740	81400.7	17q25.3	microRNA 4740
MIR5010	42514.2	17q21.2	microRNA 5010
MIR5047	64501.2	17q23.3	microRNA 5047
MIR5089	46973	17q21.32	microRNA 5089
MIR548AA2	67471.5	17q24.2	microRNA 548aa-2
MIR548AT	42494.8	17q21.2	microRNA 548at
MIR548D2	67471.5	17q24.2	microRNA 548d-2
MIR6080	64780.8	17q24.1	microRNA 6080
MIR6129	49288.3	17q21.32	microRNA 6129
MIR6165	49510.8	17q21.33	microRNA 6165
MIR632	32350.1	17q11.2	microRNA 632
MIR633	62944.2	17q23.2	microRNA 633
MIR634	66787.1	17q24.2	microRNA 634
MIR635	68424.5	17q24.2	microRNA 635
MIR636	76736.4	17q25.1	microRNA 636
MIR6510	41517.2	17q21.2	microRNA 6510
MIR6516	77089.4	17q25.2	microRNA 6516
MIR657	81125.3	17q25.3	microRNA 657
MIR6779	38915	17q12	microRNA 6779
MIR6780A	42708.1	17q21.2	microRNA 6780a
MIR6781	42823.9	17q21.31	microRNA 6781
MIR6782	44207.8	17q21.31	microRNA 6782
MIR6783	44934.6	17q21.31	microRNA 6783
MIR6784	45114.4	17q21.31	microRNA 6784
MIR6785	75498.5	17q25.1	microRNA 6785
MIR6786	81693.8	17q25.3	microRNA 6786
MIR6787	82236.7	17q25.3	microRNA 6787
MIR6866	40161.9	17q21.1	microRNA 6866
MIR6867	40193.6	17q21.1	microRNA 6867
MIR6868	76098	17q25.1	microRNA 6868
MIR6884	40026.3	17q21.1	microRNA 6884
MIR8059	50768.7	17q21.33	microRNA 8059
MKS1	58205.4	17q22	Meckel syndrome, type 1
MLLT6	38705.6	17q12	MLLT6, PHD finger containing
MLX	42567.1	17q21.2	MLX, MAX dimerization protein
MMD	55392.6	17q22	monocyte to macrophage differentiation associated
MMP28	35765.9	17q12	matrix metallopeptidase 28
MPO	58269.9	17q22	myeloperoxidase
MPP2	43875.4	17q21.31	membrane palmitoylated protein 2
MPP3	43800.8	17q21.31	membrane palmitoylated protein 3
MRC2	62627.4	17q23.2	mannose receptor C type 2
MRM1	36601.6	17q12	mitochondrial rRNA methyltransferase 1
MRPL10	47823.3	17q21.32	mitochondrial ribosomal protein L10
MRPL12	81703.4	17q25.3	mitochondrial ribosomal protein L12
MRPL27	50367.9	17q21.33	mitochondrial ribosomal protein L27
MRPL38	75898.6	17q25.1	mitochondrial ribosomal protein L38
MRPL45	38297	17q12	mitochondrial ribosomal protein L45
MRPL45P2	47450.2	17q21.32	mitochondrial ribosomal protein L45 pseudogene 2
MRPL58	75012.7	17q25.1	mitochondrial ribosomal protein L58
MRPS23	57838.9	17q22	mitochondrial ribosomal protein S23
MRPS7	75261.7	17q25.1	mitochondrial ribosomal protein S7
MSI2	57257	17q22	musashi RNA binding protein 2
MSL1	40122.5	17q21.1	MSL complex subunit 1
MSX2P1	58157	17q22	msh homeobox 2 pseudogene 1
MTMR4	58489.5	17q22	myotubularin related protein 4
MTVR2	56884.1	17q22	mouse mammary tumor virus receptor homolog 2
MXRA7	76673.6	17q25.1	matrix remodeling associated 7
MYADML2	81939.6	17q25.3	myeloid associated differentiation marker like 2
MYCBPAP	50508.4	17q21.33	MYCBP associated protein
MYL4	47209.1	17q21.32	myosin light chain 4
MYO15B	75588.1	17q25.1	myosin XVB
MYO18A	29073.5	17q11.2	myosin XVIIIA
MYO19	36495.8	17q12	myosin XIX
MYO1D	32594.2	17q11.2	myosin ID
NACA2	61590.4	17q23.2	nascent polypeptide associated complex alpha subunit 2
NAGLU	42535.9	17q21.2	N-acetyl-alpha-glucosaminidase
NAGS	44004.7	17q21.31	N-acetylglutamate synthase
NARF	82458.2	17q25.3	nuclear prelamin A recognition factor
NAT9	74770.5	17q25.1	N-acetyltransferase 9 (putative)
NBR1	43170.5	17q21.31	NBR1, autophagy cargo receptor
NDUFAF8	81239.3	17q25.3	NADH:ubiquinone oxidoreductase complex assembly factor 8
NEK8	28728.8	17q11.2	NIMA related kinase 8
NEUROD2	39603.8	17q12	neuronal differentiation 2
NF1	31094.9	17q11.2	neurofibromin 1
NFE2L1	48048.3	17q21.32	nuclear factor, erythroid 2 like 1
NGFR	49495.3	17q21.33	nerve growth factor receptor
NKIRAS2	42017.6	17q21.2	NFKB inhibitor interacting Ras like 2
NLE1	35131.3	17q12	notchless homolog 1
NLK	28042.7	17q11.2	nemo like kinase
NME1	51153.6	17q21.33	NME/NM23 nucleoside diphosphate kinase 1
NME1-NME2	51153.5	17q21.33	NME1-NME2 readthrough
NME2	51166.3	17q21.33	NME/NM23 nucleoside diphosphate kinase 2
NMT1	45061.3	17q21.31	N-myristoyltransferase 1
NOG	56593.7	17q22	noggin
NOL11	67717.8	17q24.2	nucleolar protein 11
NOS2	27756.8	17q11.2	nitric oxide synthase 2
NOTUM	81952.5	17q25.3	notum, palmitoleoyl-protein carboxylesterase
NPB	81902.1	17q25.3	neuropeptide B
NPEPPS	47531.1	17q21.32	aminopeptidase puromycin sensitive
NPLOC4	81556.9	17q25.3	NPL4 homolog, ubiquitin recognition factor
NPTX1	80466.8	17q25.3	neuronal pentraxin 1
NR1D1	40092.8	17q21.1	nuclear receptor subfamily 1 group D member 1
NSF	46590.7	17q21.31	N-ethylmaleimide sensitive factor, vesicle fusing ATPase
NSFP1	46372.8	17q21.31	N-ethylmaleimide-sensitive factor pseudogene 1
NSRP1	30116.8	17q11.2	nuclear speckle splicing regulatory protein 1
NT5C	75130.2	17q25.1	5', 3'-nucleotidase, cytosolic
NT5C3B	41825.1	17q21.2	5'-nucleotidase, cytosolic IIIB
NUFIP2	29255.8	17q11.2	NUFIP2, FMR1 interacting protein 2
NUP85	75205.4	17q25.1	nucleoporin 85
NXPH3	49575.9	17q21.33	neurexophilin 3
OGFOD3	82389.2	17q25.3	2-oxoglutarate and iron dependent oxygenase domain containing 3
OMG	31294.7	17q11.2	oligodendrocyte myelin glycoprotein
OR4D1	58155.2	17q22	olfactory receptor family 4 subfamily D member 1
OR4D2	58169.7	17q22	olfactory receptor family 4 subfamily D member 2
ORMDL3	39921	17q21.1	ORMDL sphingolipid biosynthesis regulator 3
OSBPL7	47807.4	17q21.32	oxysterol binding protein like 7
OTOP2	74924.3	17q25.1	otopetrin 2
OTOP3	74935.8	17q25.1	otopetrin 3
OXLD1	81665	17q25.3	oxidoreductase like domain containing 1
P3H4	41802	17q21.2	prolyl 3-hydroxylase family member 4 (non-enzymatic)
P4HB	81843.2	17q25.3	prolyl 4-hydroxylase subunit beta
PCGF2	38733.9	17q12	polycomb group ring finger 2
PCTP	55751	17q22	phosphatidylcholine transfer protein
PCYT2	81902.9	17q25.3	phosphate cytidylyltransferase 2, ethanolamine
PDE6G	81650.5	17q25.3	phosphodiesterase 6G
PDK2	50095.3	17q21.33	pyruvate dehydrogenase kinase 2
PECAM1	64319.4	17q23.3	platelet and endothelial cell adhesion molecule 1
PEX12	35574.8	17q12	peroxisomal biogenesis factor 12
PGAP3	39671.1	17q12	post-GPI attachment to proteins 3
PGS1	78378.6	17q25.3	phosphatidylglycerophosphate synthase 1
PHB	49404	17q21.33	prohibitin
PHF12	28905.3	17q11.2	PHD finger protein 12
PHOSPHO1	49223.4	17q21.32	phosphoethanolamine/phosphocholine phosphatase
PICART1	50050.3	17q21.33	p53 inducible cancer associated RNA transcript 1
PIGS	28553.4	17q11.2	phosphatidylinositol glycan anchor biosynthesis class S
PIGW	36534.8	17q12	phosphatidylinositol glycan anchor biosynthesis class W
PIP4K2B	38765.7	17q12	phosphatidylinositol-5-phosphate 4-kinase type 2 beta
PIPOX	29042.9	17q11.2	pipecolic acid and sarcosine oxidase
PITPNC1	67377.3	17q24.2	phosphatidylinositol transfer protein cytoplasmic 1
PLCD3	45111.6	17q21.31	phospholipase C delta 3
PLEKHH3	42667.9	17q21.2	pleckstrin homology, MyTH4 and FERM domain containing H3
PLEKHM1	45435.9	17q21.31	pleckstrin homology and RUN domain containing M1
PLEKHM1P1	64784.8	17q24.1	pleckstrin homology and RUN domain containing M1 pseudogene 1
PLXDC1	39063.3	17q12	plexin domain containing 1
PNMT	39668.5	17q12	phenylethanolamine N-methyltransferase
PNPO	47941.5	17q21.32	pyridoxamine 5'-phosphate oxidase
POLDIP2	28346.6	17q11.2	DNA polymerase delta interacting protein 2
POLG2	64477.8	17q23.3	DNA polymerase gamma 2, accessory subunit
POLRMTP1	62137.2	17q23.2	RNA polymerase mitochondrial pseudogene 1
PPM1D	60600.2	17q23.2	protein phosphatase, Mg2+/Mn2+ dependent 1D
PPM1E	58755.9	17q22	protein phosphatase, Mg2+/Mn2+ dependent 1E
PPP1R1B	39628.5	17q12	protein phosphatase 1 regulatory inhibitor subunit 1B
PPP1R27	81833.5	17q25.3	protein phosphatase 1 regulatory subunit 27
PPP1R9B	50133.7	17q21.33	protein phosphatase 1 regulatory subunit 9B
PPY	43940.8	17q21.31	pancreatic polypeptide
PPY2P	28247.4	17q11.2	pancreatic polypeptide 2, pseudogene
PRAC1	48721.7	17q21.32	PRAC1 small nuclear protein
PRAC2	48723.7	17q21.32	PRAC2 small nuclear protein
PRCD	76540	17q25.1	photoreceptor disc component
PRKAR1A	68512.4	17q24.2	protein kinase cAMP-dependent type I regulatory subunit alpha
PRKCA	66302.8	17q24.2	protein kinase C alpha
PRKCA-AS1	66398.1	17q24.2	PRKCA antisense RNA 1
PRO1804	69233	17q24.3	uncharacterized LOC100133319
PROCA1	28703.2	17q11.2	protein interacting with cyclin A1
PRPSAP1	76310.8	17q25.1	phosphoribosyl pyrophosphate synthetase associated protein 1
PRR11	59155.5	17q22	proline rich 11
PRR15L	47952	17q21.32	proline rich 15 like
PRR29	63998.4	17q23.3	proline rich 29
PRR29-AS1	63996.1	17q23.3	PRR29 antisense RNA 1
PSMB3	38752.7	17q12	proteasome subunit beta 3
PSMC3IP	42572.3	17q21.2	PSMC3 interacting protein
PSMC5	63827.4	17q23.3	proteasome 26S subunit, ATPase 5
PSMD11	32444.5	17q11.2	proteasome 26S subunit, non-ATPase 11
PSMD12	67337.9	17q24.2	proteasome 26S subunit, non-ATPase 12
PSMD3	39980.8	17q21.1	proteasome 26S subunit, non-ATPase 3
PSME3	42833.1	17q21.31	proteasome activator subunit 3
PTGES3L	42968.1	17q21.31	prostaglandin E synthase 3 like
PTGES3L-AARSD1	42950.5	17q21.31	PTGES3L-AARSD1 readthrough
PTRH2	59697.3	17q23.1	peptidyl-tRNA hydrolase 2
PVALEF	81165.5	17q25.3	parvalbumin like EF-hand containing
PYCR1	81932.4	17q25.3	pyrroline-5-carboxylate reductase 1
PYY	43952.7	17q21.31	peptide YY
PYY2	28226.8	17q11.2	peptide YY 2 (pseudogene)
QRICH2	76274	17q25.1	glutamine rich 2
RAB11FIP4	31391.6	17q11.2	RAB11 family interacting protein 4
RAB34	28714.3	17q11.2	RAB34, member RAS oncogene family
RAB37	74671.1	17q25.1	RAB37, member RAS oncogene family
RAB40B	82657.1	17q25.3	RAB40B, member RAS oncogene family
RAB5C	42125	17q21.2	RAB5C, member RAS oncogene family
RAC3	82031.7	17q25.3	Rac family small GTPase 3
RAD51C	58692.6	17q22	RAD51 paralog C
RAD51D	35099.8	17q12	RAD51 paralog D
RAD51L3-RFFL	35009.1	17q12	RAD51L3-RFFL readthrough
RAMP2	42761.2	17q21.2	receptor activity modifying protein 2
RAMP2-AS1	42753.9	17q21.2	RAMP2 antisense RNA 1
RAPGEFL1	40177.5	17q21.1	Rap guanine nucleotide exchange factor like 1
RARA	40318.2	17q21.2	retinoic acid receptor alpha
RARA-AS1	40340.9	17q21.2	RARA antisense RNA 1
RASL10B	35731.7	17q12	RAS like family 10 member B
RBFOX3	79089.3	17q25.3	RNA binding fox-1 homolog 3
RDM1	35918.1	17q12	RAD52 motif containing 1
RDM1P5	39057	17q12	RDM1 pseudogene 5
RECQL5	75626.8	17q25.1	RecQ like helicase 5
RETREG3	42579.5	17q21.2	reticulophagy regulator family member 3
RFFL	35009.1	17q12	ring finger and FYVE like domain containing E3 ubiquitin protein ligase
RFNG	82047.9	17q25.3	RFNG O-fucosylpeptide 3-beta-N-acetylglucosaminyltransferase
RGS9	65137.3	17q24.1	regulator of G protein signaling 9
RHBDF2	76470.9	17q25.1	rhomboid 5 homolog 2
RHBDL3	32266.2	17q11.2	rhomboid like 3
RHOT1	32142.5	17q11.2	ras homolog family member T1
RND2	43025.2	17q21.31	Rho family GTPase 2
RNF126P1	57045.5	17q22	ring finger protein 126 pseudogene 1
RNF135	30970.9	17q11.2	ring finger protein 135
RNF157	76142.5	17q25.1	ring finger protein 157
RNF157-AS1	76140.6	17q25.1	RNF157 antisense RNA 1
RNF213	80260.9	17q25.3	ring finger protein 213
RNF43	58352.5	17q22	ring finger protein 43
RNFT1	59952.4	17q23.1	ring finger protein, transmembrane 1
RNFT1-DT	59965.1	17q23.1	RNFT1 divergent transcript
RNU2-1	43233.8	17q21.31	RNA, U2 small nuclear 1
ROCR	72021.9	17q24.3	regulator of chondrogenesis RNA
RPL12P38	60433.7	17q23.2	ribosomal protein L12 pseudogene 38
RPL19	39200.3	17q12	ribosomal protein L19
RPL23	38850.1	17q12	ribosomal protein L23
RPL23A	28720	17q11.2	ribosomal protein L23a
RPL23AP87	83226.9	17q25.3	ribosomal protein L23a pseudogene 87
RPL27	42998.5	17q21.31	ribosomal protein L27
RPL38	74203.7	17q25.1	ribosomal protein L38
RPRML	46978.2	17q21.32	reprimo like
RPS2P47	47158.6	17q21.32	ribosomal protein S2 pseudogene 47
RPS6KB1	59893	17q23.1	ribosomal protein S6 kinase B1
RPTOR	80544.8	17q25.3	regulatory associated protein of MTOR complex 1
RSAD1	50478.8	17q21.33	radical S-adenosyl methionine domain containing 1
RUNDC1	42980.6	17q21.31	RUN domain containing 1
RUNDC3A	44308.6	17q21.31	RUN domain containing 3A
RUNDC3A-AS1	44299.6	17q21.31	RUNDC3A antisense RNA 1
SAMD14	50111.3	17q21.33	sterile alpha motif domain containing 14
SAP30BP	75667.1	17q25.1	SAP30 binding protein
SARM1	28371.7	17q11.2	sterile alpha and TIR motif containing 1
SCARNA16	77089.3	17q25.2	small Cajal body-specific RNA 16
SCARNA20	60231.5	17q23.2	small Cajal body-specific RNA 20
SCN4A	63938.6	17q23.3	sodium voltage-gated channel alpha subunit 4
SCPEP1	56978.1	17q22	serine carboxypeptidase 1
SCRN2	47837.7	17q21.32	secernin 2
SDF2	28648.4	17q11.2	stromal cell derived factor 2
SDK2	73334.4	17q25.1	sidekick cell adhesion molecule 2
SEBOX	28364.3	17q11.2	SEBOX homeobox
SEC14L1	77140.9	17q25.2-q25.3	SEC14 like lipid binding 1
SECTM1	82321	17q25.3	secreted and transmembrane 1
SEPT4	58520.2	17q22	septin 4
SEPT4-AS1	58519.8	17q22	SEPT4 antisense RNA 1
SEPT9	77319.5	17q25.3	septin 9
SEZ6	28954.9	17q11.2	seizure related 6 homolog
SGCA	50166	17q21.33	sarcoglycan alpha
SGK494	28608	17q11.2	uncharacterized serine/threonine-protein kinase SgK494
SGSH	80209.3	17q25.3	N-sulfoglucosamine sulfohydrolase
SH3GL1P1	32040.3	17q11.2	SH3 domain containing GRB2 like 1, endophilin A2 pseudogene 1
SH3GL1P2	30624.3	17q11.2	SH3 domain containing GRB2 like 1, endophilin A2 pseudogene 2
SH3GL1P3	68135	17q24.2	SH3 domain containing GRB2 like 1, endophilin A2 pseudogene 3
SIRT7	81911.9	17q25.3	sirtuin 7
SKA2	59109.9	17q22	spindle and kinetochore associated complex subunit 2
SKAP1	48133.4	17q21.32	src kinase associated phosphoprotein 1
SLC13A2	28473.6	17q11.2	solute carrier family 13 member 2
SLC16A3	82229	17q25.3	solute carrier family 16 member 3
SLC16A5	75087.9	17q25.1	solute carrier family 16 member 5
SLC16A6	68267	17q24.2	solute carrier family 16 member 6
SLC25A10	81712.2	17q25.3	solute carrier family 25 member 10
SLC25A19	75273	17q25.1	solute carrier family 25 member 19
SLC25A39	44319.6	17q21.31	solute carrier family 25 member 39
SLC26A11	80220.4	17q25.3	solute carrier family 26 member 11
SLC35B1	49700.9	17q21.33	solute carrier family 35 member B1
SLC35G3	35192.5	17q12	solute carrier family 35 member G3
SLC38A10	81250.9	17q25.3	solute carrier family 38 member 10
SLC39A11	72645.9	17q24.3-q25.1	solute carrier family 39 member 11
SLC46A1	28394.6	17q11.2	solute carrier family 46 member 1
SLC4A1	44248.4	17q21.31	solute carrier family 4 member 1 (Diego blood group)
SLC6A4	30194.3	17q11.2	solute carrier family 6 member 4
SLC9A3R1	74748.6	17q25.1	SLC9A3 regulator 1
SLFN11	35350.3	17q12	schlafen family member 11
SLFN12	35410.9	17q12	schlafen family member 12
SLFN12L	35474.9	17q12	schlafen family member 12 like
SLFN13	35435.1	17q12	schlafen family member 13
SLFN14	35548.1	17q12	schlafen family member 14
SLFN5	35243.1	17q12	schlafen family member 5
SMARCD2	63832.1	17q23.3	SWI/SNF related, matrix associated, actin dependent regulator of chromatin, subfamily d, member 2
SMARCE1	40627.7	17q21.2	SWI/SNF related, matrix associated, actin dependent regulator of chromatin, subfamily e, member 1
SMG8	59210	17q22	SMG8, nonsense mediated mRNA decay factor
SMIM5	75633.4	17q25.1	small integral membrane protein 5
SMIM6	75646.6	17q25.1	small integral membrane protein 6
SMURF2	64544.6	17q23.3-q24.1	SMAD specific E3 ubiquitin protein ligase 2
SMURF2P1-LRRC37BP1	30576.5	17q11.2	SMURF2P1-LRRC37BP1 readthrough transcribed pseudogene
SNF8	48930.1	17q21.32	SNF8, ESCRT-II complex subunit
SNHG16	76557.8	17q25.1	small nucleolar RNA host gene 16
SNHG20	77088.6	17q25.2	small nucleolar RNA host gene 20
SNHG25	64146	17q23.3	small nucleolar RNA host gene 25
SNORA21	38852.9	17q12	small nucleolar RNA, H/ACA box 21
SNORA21B	38851.5	17q12	small nucleolar RNA, H/ACA box 21B
SNORA38B	67740.7	17q24.2	small nucleolar RNA, H/ACA box 38B
SNORA50C	64146.3	17q23.3	small nucleolar RNA, H/ACA box 50C
SNORA90	37244.8	17q12	small nucleolar RNA, H/ACA box 90
SNORD104	64146.1	17q23.3	small nucleolar RNA, C/D box 104
SNORD124	40027.5	17q21.1	small nucleolar RNA, C/D box 124
SNORD134	82090	17q25.3	small nucleolar RNA, C/D box 134
SNORD1A	76561.6	17q25.1	small nucleolar RNA, C/D box 1A
SNORD1B	76561.1	17q25.1	small nucleolar RNA, C/D box 1B
SNORD1C	76558.8	17q25.1	small nucleolar RNA, C/D box 1C
SNORD42A	28723.4	17q11.2	small nucleolar RNA, C/D box 42A
SNORD42B	28720.5	17q11.2	small nucleolar RNA, C/D box 42B
SNORD4A	28722.6	17q11.2	small nucleolar RNA, C/D box 4A
SNORD4B	28723.7	17q11.2	small nucleolar RNA, C/D box 4B
SNORD7	35573.7	17q12	small nucleolar RNA, C/D box 7
SNX11	48107.5	17q21.32	sorting nexin 11
SOCS3	78356.8	17q25.3	suppressor of cytokine signaling 3
SOCS7	38352.1	17q12	suppressor of cytokine signaling 7
SOST	43753.7	17q21.31	sclerostin
SOX9	72121	17q24.3	SRY-box 9
SOX9-AS1	72079.9	17q24.3	SOX9 antisense RNA 1
SP2	47896.2	17q21.32	Sp2 transcription factor
SP2-AS1	47898.4	17q21.32	SP2 antisense RNA 1
SP6	47844.9	17q21.32	Sp6 transcription factor
SPACA3	32991.9	17q11.2	sperm acrosome associated 3
SPAG5	28577.6	17q11.2	sperm associated antigen 5
SPAG5-AS1	28599.1	17q11.2	SPAG5 antisense RNA 1
SPAG9	50962.2	17q21.33	sperm associated antigen 9
SPATA20	50547.1	17q21.33	spermatogenesis associated 20
SPATA32	45254.4	17q21.31	spermatogenesis associated 32
SPHK1	76384.6	17q25.1	sphingosine kinase 1
SPOP	49598.9	17q21.33	speckle type BTB/POZ protein
SPPL2C	45844.9	17q21.31	signal peptide peptidase like 2C
SRCIN1	38530	17q12	SRC kinase signaling inhibitor 1
SRP68	76038.8	17q25.1	signal recognition particle 68
SRSF1	58000.9	17q22	serine and arginine rich splicing factor 1
SRSF2	76734.1	17q25.1	serine and arginine rich splicing factor 2
SSH2	29625.9	17q11.2	slingshot protein phosphatase 2
SSTR2	73165	17q25.1	somatostatin receptor 2
ST6GALNAC1	76624.8	17q25.1	ST6 N-acetylgalactosaminide alpha-2,6-sialyltransferase 1
ST6GALNAC2	76565.4	17q25.1	ST6 N-acetylgalactosaminide alpha-2,6-sialyltransferase 2
STAC2	39210.5	17q12	SH3 and cysteine rich domain 2
STARD3	39637.1	17q12	StAR related lipid transfer domain containing 3
STAT3	42313.3	17q21.2	signal transducer and activator of transcription 3
STAT5A	42287.5	17q21.2	signal transducer and activator of transcription 5A
STAT5B	42199.2	17q21.2	signal transducer and activator of transcription 5B
STH	45999.2	17q21.31	saitohin
STRADA	63702.8	17q23.3	STE20 related adaptor alpha
STXBP4	54968.8	17q22	syntaxin binding protein 4
SUMO2	75167.7	17q25.1	small ubiquitin-like modifier 2
SUPT4H1	58345.2	17q22	SPT4 homolog, DSIF elongation factor subunit
SUPT6H	28662.2	17q11.2	SPT6 homolog, histone chaperone
SUZ12	31937	17q11.2	SUZ12, polycomb repressive complex 2 subunit
SUZ12P1	30709.6	17q11.2	SUZ12 polycomb repressive complex 2 subunit pseudogene 1
SYNGR2	78168.5	17q25.3	synaptogyrin 2
SYNRG	37514.8	17q12	synergin gamma
TAC4	49838.3	17q21.33	tachykinin 4
TACO1	63600.9	17q23.3	translational activator of cytochrome c oxidase I
TADA2A	37407.2	17q12	transcriptional adaptor 2A
TAF15	35809.5	17q12	TATA-box binding protein associated factor 15
TANC2	63009.5	17q23.2-q23.3	tetratricopeptide repeat, ankyrin repeat and coiled-coil containing 2
TAOK1	29390.9	17q11.2	TAO kinase 1
TBC1D16	79932.3	17q25.3	TBC1 domain family member 16
TBC1D29	30559.6	17q11.2	TBC1 domain family member 29
TBC1D3	37924.5	17q12	TBC1 domain family member 3
TBC1D3B	36165.7	17q12	TBC1 domain family member 3B
TBC1D3C	38004	17q12	TBC1 domain family member 3C
TBC1D3D	36165.7	17q12	TBC1 domain family member 3D
TBC1D3E	38128	17q12	TBC1 domain family member 3E
TBC1D3F	36428.6	17q12	TBC1 domain family member 3F
TBC1D3G	36165.7	17q12	TBC1 domain family member 3G
TBC1D3H	36165.6	17q12	TBC1 domain family member 3H
TBC1D3I	36165.7	17q12	TBC1 domain family member 3I
TBC1D3J	36449.7	17q12	TBC1 domain family member 3J
TBC1D3K	36377.5	17q12	TBC1 domain family member 3K
TBC1D3L	36165.7	17q12	TBC1 domain family member 3L
TBC1D3P1-DHX40P1	59962.4	17q23.1	TBC1D3P1-DHX40P1 readthrough, transcribed pseudogene
TBC1D3P2	62264.7	17q23.2	TBC1 domain family member 3 pseudogene 2
TBC1D3P5	27418	17q11.2	TBC1 domain family member 3 pseudogene 5
TBCD	82752.1	17q25.3	tubulin folding cofactor D
TBKBP1	47695.3	17q21.32	TBK1 binding protein 1
TBX2	61399.9	17q23.2	T-box 2
TBX2-AS1	61393.5	17q23.2	TBX2 antisense RNA 1
TBX21	47733.2	17q21.32	T-box 21
TBX4	61452.4	17q23.2	T-box 4
TCAM1P	63857	17q23.3	testicular cell adhesion molecule 1, pseudogene
TCAP	39665.3	17q12	titin-cap
TEFM	30899	17q11.2	transcription elongation factor, mitochondrial
TEN1	75979.2	17q25.1	TEN1, CST complex subunit
TEN1-CDK3	75979.2	17q25.1	TEN1-CDK3 readthrough (NMD candidate)
TEPSIN	81228.3	17q25.3	TEPSIN, adaptor related protein complex 4 accessory protein
TEX14	58556.7	17q22	testis expressed 14, intercellular bridge forming factor
TEX19	82359.2	17q25.3	testis expressed 19
TEX2	64147.4	17q23.3	testis expressed 2
THCAT158	47303.4	17q21.32	thyroid cancer-associated transcript 158
THRA	40062.8	17q21.1	thyroid hormone receptor alpha
TIAF1	29073.5	17q11.2	TGFB1-induced anti-apoptotic factor 1
TIMP2	78853	17q25.3	TIMP metallopeptidase inhibitor 2
TK1	78174.1	17q25.3	thymidine kinase 1
TLCD1	28724.3	17q11.2	TLC domain containing 1
TLK2	62479	17q23.2	tousled like kinase 2
TMC6	78112.9	17q25.3	transmembrane channel like 6
TMC8	78130.8	17q25.3	transmembrane channel like 8
TMEM100	55719.6	17q22	transmembrane protein 100
TMEM101	44011.2	17q21.31	transmembrane protein 101
TMEM104	74776.5	17q25.1	transmembrane protein 104
TMEM105	81311.3	17q25.3	transmembrane protein 105
TMEM106A	43211.8	17q21.31	transmembrane protein 106A
TMEM132E	34580.7	17q12	transmembrane protein 132E
TMEM199	28357.6	17q11.2	transmembrane protein 199
TMEM235	78231.3	17q25.3	transmembrane protein 235
TMEM92	50271.4	17q21.33	transmembrane protein 92
TMEM92-AS1	50281.6	17q21.33	TMEM92 antisense RNA 1
TMEM94	75476.5	17q25.1	transmembrane protein 94
TMEM97	28319.1	17q11.2	transmembrane protein 97
TMEM98	32927.9	17q11.2	transmembrane protein 98
TMEM99	40819.2	17q21.2	transmembrane protein 99
TMIGD1	30316.3	17q11.2	transmembrane and immunoglobulin domain containing 1
TMUB2	44187	17q21.31	transmembrane and ubiquitin like domain containing 2
TNFAIP1	28335.5	17q11.2	TNF alpha induced protein 1
TNRC6C	78004.2	17q25.3	trinucleotide repeat containing 6C
TNRC6C-AS1	78107.4	17q25.3	TNRC6C antisense RNA 1
TNS4	40475.8	17q21.2	tensin 4
TOB1	50862.2	17q21.33	transducer of ERBB2, 1
TOB1-AS1	50866.7	17q21.33	TOB1 antisense RNA 1
TOM1L1	54900.7	17q22	target of myb1 like 1 membrane trafficking protein
TOP2A	40388.5	17q21.2	DNA topoisomerase II alpha
TP53I13	29568.6	17q11.2	tumor protein p53 inducible protein 13
TRAF4	28744	17q11.2	TNF receptor associated factor 4
TRG-GCC2-6	27902.9	17p13.1	transfer RNA-Gly (GCC) 2-6
TRIM25	56887.9	17q22	tripartite motif containing 25
TRIM37	58998.2	17q22	tripartite motif containing 37
TRIM47	75874.2	17q25.1	tripartite motif containing 47
TRIM65	75889	17q25.1	tripartite motif containing 65
TSEN54	75516.5	17q25.1	tRNA splicing endonuclease subunit 54
TSPAN10	81637.2	17q25.3	tetraspanin 10
TSPOAP1	58301.2	17q22	TSPO associated protein 1
TSPOAP1-AS1	58325.4	17q22	TSPOAP1 antisense RNA 1
TTC25	41930.6	17q21.2	tetratricopeptide repeat domain 25
TTLL6	48762.2	17q21.32	tubulin tyrosine ligase like 6
TTYH2	74248.4	17q25.1	tweety family member 2
TUBD1	59859.5	17q23.1	tubulin delta 1
TUBG1	42609.3	17q21.2	tubulin gamma 1
TUBG2	42659.2	17q21.2	tubulin gamma 2
UBALD2	76265.2	17q25.1	UBA like domain containing 2
UBE2O	76389.5	17q25.1	ubiquitin conjugating enzyme E2 O
UBE2Z	48908.4	17q21.32	ubiquitin conjugating enzyme E2 Z
UBTF	44205	17q21.31	upstream binding transcription factor
UNC119	28546.7	17q11.2	unc-119 lipid binding chaperone
UNC13D	75827.2	17q25.1	unc-13 homolog D
UNC45B	35147.8	17q12	unc-45 myosin chaperone B
UNK	75784.8	17q25.1	unk zinc finger
USH1G	74916.1	17q25.1	USH1 protein network component sans
USP32	60177.3	17q23.1-q23.2	ubiquitin specific peptidase 32
USP36	78795.7	17q25.3	ubiquitin specific peptidase 36
UTP18	51260.5	17q21.33	UTP18, small subunit processome component
UTP6	31863.2	17q11.2	UTP6, small subunit processome component
UTS2R	82374.3	17q25.3	urotensin 2 receptor
VAT1	43014.6	17q21.31	vesicle amine transport 1
VEZF1	57971.5	17q22	vascular endothelial zinc finger 1
VMP1	59707.5	17q23.1	vacuole membrane protein 1
VPS25	42773.4	17q21.2	vacuolar protein sorting 25 homolog
VTN	28367.3	17q11.2	vitronectin
WBP2	75845.7	17q25.1	WW domain binding protein 2
WDR45B	82614.6	17q25.3	WD repeat domain 45B
WFDC21P	60083.6	17q23.1	WAP four-disulfide core domain 21, pseudogene
WFIKKN2	50835.2	17q21.33	WAP, follistatin/kazal, immunoglobulin, kunitz and netrin domain containing 2
WIPF2	40219.3	17q21.2	WAS/WASL interacting protein family member 2
WIPI1	68421.3	17q24.2	WD repeat domain, phosphoinositide interacting 1
WNK4	42780.6	17q21.2	WNK lysine deficient protein kinase 4
WNT3	46762.5	17q21.31-q21.32	Wnt family member 3
WNT9B	46851.6	17q21.32	Wnt family member 9B
WSB1	27294	17q11.1	WD repeat and SOCS box containing 1
XYLT2	50346	17q21.33	xylosyltransferase 2
YPEL2	59331.7	17q22	yippee like 2
ZACN	76079.2	17q25.1	zinc activated ion channel
ZNF207	32350.1	17q11.2	zinc finger protein 207
ZNF385C	42025.6	17q21.2	zinc finger protein 385C
ZNF652	49289.2	17q21.32-q21.33	zinc finger protein 652
ZNF750	82829.4	17q25.3	zinc finger protein 750
ZNF830	34961.5	17q12	zinc finger protein 830
ZNHIT3	36486.6	17q12	zinc finger HIT-type containing 3
ZPBP2	39868.2	17q21.1	zona pellucida binding protein 2
