# Supplementary material for: Metabolic reprogramming of cancer cells by JMJD6-mediated pre-mRNA splicing associated with therapeutic response to splicing inhibitor
Source: eLife. 2024 Mar 15;12:RP90993. doi: 10.7554/eLife.90993 (PMC10942784; doi:10.7554/eLife.90993)
Supplement: Figure 3—source data 1. [file elife-90993-fig3-data1.xlsx]

## Sheet: BE2C
gene	logFC	AveExpr	t	PValue	adjPVal	B	score
DGKZ	1.47956e-06	4.99084	1.11841e-05	0.999991	0.999991	-6.78942	3.77937e-06
ZC3H14	2.47416e-06	6.48567	1.81956e-05	0.999986	0.999991	-6.95941	6.1609e-06
TMEM167A	3.71761e-05	7.75179	0.000203554	0.999841	0.999991	-7.02171	6.88621e-05
C11orf21	9.11258e-05	-2.82057	7.12877e-05	0.999945	0.999991	-5.82072	2.41005e-05
TRADD	-9.69573e-05	2.21769	-0.000430556	0.999665	0.999886	-6.11878	0.000145633
LINC00271	-0.000452296	-2.43526	-0.000613946	0.999522	0.999799	-5.79425	0.000207707
AP1S1	-0.000319683	6.12615	-0.000896124	0.999302	0.999723	-6.92901	0.000303179
RBMS1	-0.00030917	7.22283	-0.000813566	0.999366	0.999723	-6.98227	0.000275255
CTNNBL1	-0.000235458	5.72661	-0.00081433	0.999366	0.999723	-6.9269	0.000275514
MTX1	-0.000196909	5.45869	-0.000862979	0.999328	0.999723	-6.85605	0.000291962
LRBA	0.000241165	8.47125	0.0007831	0.99939	0.999723	-7.05524	0.000264946
RP11-227D13.4	0.000943516	-2.33474	0.000940657	0.999267	0.999723	-5.74424	0.000318255
Z83851.4	-0.00111279	-2.02407	-0.00151684	0.998819	0.999484	-5.73148	0.000513311
GGA3	0.000263771	4.87767	0.00166682	0.998702	0.999422	-6.76323	0.000564111
MAPRE1	-0.000215733	7.28073	-0.0018264	0.998578	0.999353	-7.01394	0.000618157
MARC2	0.00363382	-1.81585	0.00210449	0.998361	0.999192	-5.6342	0.000712344
PPARG	-0.00261376	2.50998	-0.00336744	0.997378	0.998962	-5.98428	0.00114043
GSTM3	-0.0016125	5.47187	-0.0028474	0.997783	0.998962	-6.93796	0.000964105
RP11-315I20.1	-0.00151522	-0.640717	-0.00265221	0.997935	0.998962	-5.85278	0.000897954
ENTPD7	-0.000901235	4.5292	-0.00308978	0.997594	0.998962	-6.69551	0.00104628
SPPL2B	-0.000897948	4.89588	-0.00247873	0.99807	0.998962	-6.85164	0.000839153
SETD2	-0.000693243	5.86935	-0.00320394	0.997505	0.998962	-6.92523	0.00108497
KCMF1	-0.000647496	5.60247	-0.0030565	0.99762	0.998962	-6.84107	0.00103499
RPS6KA3	-0.000583536	6.88903	-0.00268136	0.997912	0.998962	-6.95006	0.000907837
PUM1	-0.000401494	7.01293	-0.00279929	0.99782	0.998962	-6.96604	0.000947787
FITM2	-0.000334422	3.80797	-0.0024714	0.998075	0.998962	-6.68475	0.000836663
AC092295.7	0.000619581	1.4795	0.00250399	0.99805	0.998962	-6.09174	0.000847712
ALG10B	0.000636029	3.34879	0.00327644	0.997448	0.998962	-6.59138	0.00110957
NSG2	0.000669489	5.3977	0.00295508	0.997699	0.998962	-7.11233	0.00100061
CHD2	0.000969531	6.61213	0.00336619	0.997379	0.998962	-6.94498	0.00113999
PPP1R2	0.00106912	6.05839	0.00288214	0.997755	0.998962	-6.94453	0.000975884
CERS1	0.00122196	0.069584	0.00261185	0.997966	0.998962	-6.09822	0.000884258
POMZP3	0.00124056	2.44415	0.00372213	0.997101	0.998962	-6.27336	0.00126071
CFP	0.00170667	-2.1494	0.00278503	0.997831	0.998962	-5.71745	0.000942962
NR2F1	0.00234419	5.03462	0.00361559	0.997184	0.998962	-6.6948	0.00122458
STK24-AS1	0.00298677	-1.3858	0.00324596	0.997472	0.998962	-5.76476	0.00109921
CBLN4	0.00429523	-3.89339	0.00293854	0.997712	0.998962	-5.57896	0.000995005
RP11-204L24.2	-0.00282483	-3.66704	-0.00397296	0.996906	0.998955	-5.57747	0.0013458
RP11-212I21.4	-0.0026404	-2.5835	-0.00413982	0.996776	0.998901	-5.8488	0.00140241
SRRM4	-0.00102045	1.07034	-0.00412035	0.996791	0.998901	-6.51148	0.00139581
SIK2	-0.000946483	5.2591	-0.00418351	0.996742	0.998901	-6.9167	0.00141724
SPATA5L1	0.000633021	4.78528	0.00411308	0.996797	0.998901	-6.83452	0.00139334
MFSD12	0.00234373	5.43844	0.00419565	0.996733	0.998901	-6.88451	0.00142137
RP11-63P12.6	-0.0017994	-3.25446	-0.00460791	0.996412	0.998878	-5.75039	0.00156127
ADRBK1	0.000683882	6.02643	0.00452346	0.996477	0.998878	-6.94542	0.00153261
TFB1M	0.00115204	3.93032	0.00449915	0.996496	0.998878	-6.73038	0.00152435
HTT	-0.000618531	6.80555	-0.00482258	0.996244	0.998792	-6.97687	0.00163415
BCL11B	0.00182637	0.495228	0.00491156	0.996175	0.998778	-5.88677	0.00166434
SLC38A5	0.0041445	-2.9186	0.00497875	0.996123	0.998778	-5.7171	0.00168716
CHST12	-0.00125027	3.58422	-0.00512586	0.996008	0.998721	-6.61434	0.0017371
CRTC2	-0.00219384	3.61508	-0.00534831	0.995835	0.998643	-6.51306	0.00181266
TRAM1	-0.00191234	7.24849	-0.00529784	0.995874	0.998643	-6.98533	0.00179551
ZNF26	-0.00120559	4.743	-0.00538031	0.99581	0.998643	-6.65801	0.00182353
RP11-396C23.2	0.0056772	-0.889348	0.00561267	0.995629	0.998563	-5.82207	0.00190243
TRABD2B	-0.00486771	-2.10261	-0.00578489	0.995495	0.998517	-5.61956	0.00196096
AGAP1-IT1	-0.00320192	-1.96501	-0.00602923	0.995305	0.998517	-5.78483	0.00204397
DOCK5	-0.00289958	4.47886	-0.00610552	0.995245	0.998517	-6.49525	0.0020699
C8orf33	-0.0016603	6.62067	-0.00616142	0.995202	0.998517	-6.95101	0.00208889
MCM3AP	0.000744611	7.38349	0.00635875	0.995048	0.998517	-7.00231	0.00215595
PHF17	0.000894839	6.59739	0.00583094	0.995459	0.998517	-6.93921	0.00197659
NAA35	0.0011667	5.59687	0.00574302	0.995528	0.998517	-6.87494	0.00194674
SNX17	0.00166967	6.75133	0.00612689	0.995229	0.998517	-6.98054	0.00207716
PLAG1	0.00362559	-0.57074	0.00637116	0.995038	0.998517	-6.13184	0.00216016
DLG4	0.00548519	3.00475	0.00587258	0.995427	0.998517	-6.42254	0.00199073
TAP1	0.00572678	1.74815	0.00629868	0.995095	0.998517	-5.8104	0.00213553
SRR	0.00573266	0.248836	0.00624145	0.995139	0.998517	-5.92818	0.0021161
KIAA1257	0.00943802	-3.15756	0.00594944	0.995367	0.998517	-5.64677	0.00201687
PLAUR	0.0153159	2.14862	0.00593864	0.995375	0.998517	-5.93637	0.00201318
COMMD6	0.00238117	6.18712	0.00680115	0.994704	0.998468	-6.94752	0.00230634
RP4-739H11.4	-0.00290947	0.289938	-0.0069047	0.994623	0.998442	-6.02331	0.00234155
RP11-394O4.3	-0.00654112	-1.59196	-0.00718319	0.994406	0.998417	-5.88208	0.00243627
SIPA1L2	-0.00516921	5.64638	-0.00702535	0.994529	0.998417	-6.76315	0.0023826
NHLRC4	-0.00427	0.412269	-0.00709833	0.994472	0.998417	-6.2043	0.0024074
DOLPP1	-0.00247733	5.33194	-0.00700824	0.994542	0.998417	-6.90912	0.00237677
ADRBK2	0.0029824	6.33314	0.00725332	0.994351	0.998417	-7.01928	0.00246012
PSMD8	0.00354808	7.35012	0.00740126	0.994236	0.998407	-6.99711	0.00251044
CASP10	0.00354967	0.769028	0.0073759	0.994256	0.998407	-6.00621	0.00250182
PTX3	-0.0367256	1.3735	-0.00801945	0.993755	0.998349	-5.54845	0.00272078
C7orf41	-0.00428417	4.51983	-0.00778803	0.993935	0.998349	-6.67218	0.00264202
SEP15	0.00130195	7.22067	0.00766167	0.994033	0.998349	-6.97356	0.00259902
HIATL1	0.00138134	5.99459	0.00759303	0.994087	0.998349	-6.90985	0.00257567
KIAA1033	0.00280603	6.72632	0.00791022	0.99384	0.998349	-6.9545	0.00268362
FBXO27	0.00470554	-2.32531	0.0076744	0.994023	0.998349	-5.66358	0.00260337
CDK3	0.00492082	-1.75994	0.00762489	0.994062	0.998349	-5.73487	0.00258652
MED1	-0.00113429	6.36408	-0.00834304	0.993503	0.998151	-6.9478	0.00283091
HOXD-AS2	0.00151335	2.49621	0.00837261	0.99348	0.998151	-6.45092	0.00284099
QRICH2	-0.00823188	1.98438	-0.00880053	0.993146	0.998006	-6.14224	0.00298669
TBC1D3B	-0.00425861	-1.98935	-0.00876616	0.993173	0.998006	-5.66357	0.00297499
PTPRE	-0.0027827	2.9935	-0.00867696	0.993243	0.998006	-6.13085	0.0029446
MPZL1	0.00104348	7.83572	0.00895025	0.99303	0.998006	-7.02593	0.00303768
CTB-58E17.5	0.00317845	-1.21274	0.00867044	0.993248	0.998006	-5.81224	0.00294239
RP11-259K5.2	-0.00346971	0.235989	-0.00910593	0.992909	0.997943	-6.04995	0.0030907
CYP1B1	-0.0132817	2.36032	-0.00959462	0.992528	0.997873	-5.83375	0.00325717
RP11-153F1.1	-0.0109494	-3.85156	-0.00950811	0.992595	0.997873	-5.63501	0.0032277
CTD-2017C7.2	-0.00662079	-1.35511	-0.0096519	0.992483	0.997873	-5.85336	0.00327671
PDE6A	-0.00589863	-2.11017	-0.0098751	0.99231	0.997873	-5.81162	0.00335277
RP11-758P17.2	-0.00480771	-3.27708	-0.00926668	0.992783	0.997873	-5.6641	0.00314546
NUP188	-0.00410486	6.54053	-0.00927738	0.992775	0.997873	-6.96712	0.00314911
GEMIN8	-0.003971	2.74887	-0.00955206	0.992561	0.997873	-6.48071	0.00324267
C9orf135	-0.00297041	0.537585	-0.0094567	0.992635	0.997873	-6.20856	0.0032102
RPS5	-0.00160916	10.0444	-0.00978524	0.99238	0.997873	-7.12866	0.00332214
ZNF791	-0.00159025	5.51346	-0.00936928	0.992704	0.997873	-6.87487	0.0031804
CSK	-0.00142679	5.90001	-0.0101496	0.992096	0.997873	-6.92343	0.00344632
NDUFS6	0.000841557	6.27491	0.00989724	0.992292	0.997873	-6.96955	0.00336031
JAKMIP2	0.00177061	5.19252	0.00969493	0.99245	0.997873	-6.95348	0.00329136
PELI1	0.00213918	5.38047	0.00983848	0.992338	0.997873	-6.87497	0.00334027
ZNF630	0.00463283	0.811461	0.0096048	0.99252	0.997873	-6.29088	0.00326064
GPR56	0.00571049	0.375406	0.0101352	0.992107	0.997873	-6.09473	0.00344142
CTD-3105H18.14	0.00900595	-2.74437	0.00949194	0.992608	0.997873	-5.75879	0.0032222
SSUH2	-0.0038544	-0.674268	-0.0107387	0.991637	0.997666	-6.2104	0.00364718
TBC1D7	0.00215653	4.67652	0.010843	0.991556	0.99764	-6.7439	0.00368276
RP11-38G5.4	0.00696701	-2.79956	0.0110338	0.991407	0.997546	-5.70972	0.00374785
ZSWIM1	-0.00195878	3.12532	-0.0112051	0.991274	0.997468	-6.49681	0.00380629
SCML4	-0.00967791	-3.69184	-0.0115538	0.991002	0.997467	-5.75422	0.00392528
AC002472.11	-0.00941825	-3.44788	-0.0115658	0.990993	0.997467	-5.58301	0.00392935
PHKA1	-0.00394182	5.17274	-0.0114241	0.991103	0.997467	-6.87099	0.003881
SEL1L	-0.00212094	6.2058	-0.0115794	0.990983	0.997467	-6.91823	0.003934
NOLC1	0.00124223	8.68935	0.0114039	0.991119	0.997467	-7.06723	0.00387413
FAM63A	0.00227546	3.39582	0.0112779	0.991217	0.997467	-6.53667	0.00383112
GSTZ1	0.00305133	4.5066	0.0116236	0.990948	0.997467	-6.78231	0.00394907
FSTL3	0.00464332	2.01813	0.0112771	0.991218	0.997467	-6.1465	0.00383086
RNF14	-0.00563284	6.33144	-0.0118857	0.990744	0.997435	-6.96143	0.00403855
RP11-307L14.1	-0.00956056	-1.5685	-0.0119692	0.990679	0.997425	-5.85626	0.00406703
RP11-148O21.6	0.0116843	-3.07405	0.0121708	0.990522	0.997323	-5.7327	0.00413589
EXD2	-0.00236915	4.99108	-0.0123305	0.990398	0.997253	-6.83764	0.00419041
RP11-425I13.3	-0.0093881	1.50975	-0.0125914	0.990194	0.997105	-6.16471	0.00427949
KIF21B	-0.00823477	-0.733562	-0.0127153	0.990098	0.997105	-5.83109	0.00432182
ZNF589	-0.00340251	2.4385	-0.0126316	0.990163	0.997105	-6.38737	0.00429322
LINC00086	-0.0134605	-0.948094	-0.0129091	0.989947	0.997047	-5.7249	0.00438802
CDC37L1	-0.00538653	4.79885	-0.01302	0.989861	0.997047	-6.84452	0.00442591
AF131216.5	-0.00522558	-0.516037	-0.0129507	0.989915	0.997047	-5.94415	0.00440225
C2orf27A	-0.00450915	1.012	-0.0128777	0.989972	0.997047	-6.05969	0.0043773
ZNF843	0.0153916	-2.27168	0.0131039	0.989795	0.997047	-5.74364	0.00445455
ZNF865	0.00424474	1.91528	0.013274	0.989663	0.997015	-6.19895	0.00451272
FCGBP	0.0108601	-0.626946	0.0133152	0.989631	0.997015	-5.74786	0.00452679
AMPD3	-0.00720089	3.03956	-0.0135547	0.989444	0.996906	-6.48196	0.00460864
CYB561	0.00584992	7.97296	0.0137459	0.989295	0.996812	-7.06603	0.00467397
SRP14	0.00133134	7.86719	0.0138272	0.989232	0.996803	-7.02455	0.00470176
MALT1	-0.00437891	4.3097	-0.0139701	0.989121	0.996747	-6.58778	0.00475065
PCDHB3	0.0127984	2.45874	0.0139736	0.989118	0.996747	-6.08785	0.0047518
MED20	0.00311427	5.06771	0.0141218	0.989003	0.996739	-6.83095	0.00480249
LINC00342	-0.00990501	-0.572306	-0.0142632	0.988893	0.996684	-5.91631	0.00485084
GPAA1	-0.00225054	6.43896	-0.0145512	0.988668	0.996647	-6.91684	0.00494935
UGGT1	0.00233724	7.7269	0.0143808	0.988801	0.996647	-6.97817	0.00489108
GYG1	0.00353496	5.25493	0.01443	0.988763	0.996647	-6.9005	0.00490791
PDF	0.00387557	0.720146	0.0144471	0.988749	0.996647	-6.08152	0.00491375
BCL2L10	0.023667	-3.07167	0.0146614	0.988583	0.996647	-5.79086	0.00498706
AMIGO2	-0.0543164	-1.52477	-0.0147927	0.98848	0.996603	-5.54734	0.00503194
LINC00339	-0.0109013	2.94405	-0.0150044	0.988315	0.996492	-6.41979	0.00510441
NOP10	0.00283674	6.73504	0.0151682	0.988188	0.996419	-6.96682	0.00516044
ALPK1	0.0171406	0.310081	0.0151777	0.988181	0.996419	-5.5979	0.00516369
RP11-1079K10.3	-0.0194597	-3.04947	-0.015339	0.988055	0.996396	-5.61795	0.00521888
GABPB2	-0.0102506	2.28346	-0.0154198	0.987992	0.996389	-6.32095	0.00524658
LINC00958	0.00596326	-3.91651	0.0154452	0.987972	0.996389	-5.82736	0.00525525
CHIC1	-0.00243161	4.46625	-0.0155933	0.987857	0.996364	-6.80602	0.00530595
SLC16A6	-0.0051997	0.60824	-0.0157182	0.98776	0.996321	-6.6436	0.00534872
FYTTD1	-0.00388504	6.84747	-0.0158881	0.987627	0.996244	-6.99149	0.00540688
RP11-439C15.4	-0.0141514	-3.30533	-0.0161668	0.98741	0.996081	-5.76711	0.00550232
RP11-299H21.1	-0.0116277	0.070713	-0.0162718	0.987329	0.996081	-5.9322	0.00553829
DNAJC22	-0.00713545	2.30578	-0.0162036	0.987382	0.996081	-6.36714	0.00551493
PGLS	0.00559365	4.48748	0.0162819	0.987321	0.996081	-6.6895	0.00554175
GRIN2D	-0.00922307	-1.53516	-0.0166027	0.987071	0.995961	-5.69706	0.00565162
RP5-886K2.3	0.00735217	1.09389	0.0166434	0.987039	0.995961	-6.00889	0.00566557
CTF1	0.0180603	-2.74036	0.0166792	0.987011	0.995961	-5.54731	0.00567782
KATNAL2	-0.0171605	1.85042	-0.0168883	0.986849	0.995904	-5.97586	0.0057495
RP3-406P24.4	-0.014456	-3.79804	-0.0170215	0.986745	0.995876	-5.54924	0.00579514
CRYZ	-0.00849689	5.66863	-0.0177682	0.986163	0.995876	-6.73011	0.00605108
TACC1	-0.00817047	4.80483	-0.0175352	0.986345	0.995876	-6.78782	0.00597121
PDLIM1	-0.00778205	0.864298	-0.0176447	0.98626	0.995876	-5.98875	0.00600877
AL773604.8	-0.00686731	-0.578497	-0.018088	0.985914	0.995876	-5.91097	0.00616079
RP11-384K6.6	-0.00610368	0.579307	-0.0182227	0.98581	0.995876	-6.10331	0.00620697
ANKRD40	-0.00538116	7.11726	-0.0182026	0.985825	0.995876	-6.96801	0.00620009
BEX2	-0.00516719	3.77675	-0.0172822	0.986542	0.995876	-6.7753	0.00588448
RP11-156E6.1	-0.00399583	4.96119	-0.0170003	0.986761	0.995876	-6.86626	0.00578785
LSM14B	-0.00365826	5.8974	-0.0179261	0.98604	0.995876	-6.907	0.00610526
CCDC22	-0.00204984	3.79551	-0.0171745	0.986626	0.995876	-6.6622	0.00584756
NXT1	0.00342774	4.61934	0.0176511	0.986255	0.995876	-6.7822	0.00601094
MRPL19	0.00446641	5.57901	0.0170499	0.986723	0.995876	-6.84723	0.00580485
CCDC28B	0.00468434	4.16963	0.017172	0.986628	0.995876	-6.62875	0.00584672
CCDC85B	0.00533302	5.48291	0.0183477	0.985712	0.995876	-6.89018	0.00624988
RP5-991G20.1	0.00547031	0.623515	0.0178733	0.986082	0.995876	-6.02023	0.00608714
RP11-67L2.2	0.0060718	0.889941	0.0169947	0.986766	0.995876	-6.05073	0.00578594
PLXNC1	0.00637606	2.6661	0.0178089	0.986132	0.995876	-6.22667	0.00606504
TIGD3	0.0102281	-0.450023	0.0176287	0.986272	0.995876	-5.84301	0.00600328
LINC00523	0.0120032	-3.79227	0.0170246	0.986742	0.995876	-5.77822	0.00579619
ST3GAL5	0.0151791	3.7053	0.0174338	0.986424	0.995876	-6.57147	0.00593646
UGGT2	-0.00206229	5.74539	-0.0186689	0.985462	0.99573	-6.89364	0.00636006
CCBL1	0.00493415	3.91259	0.0187094	0.985431	0.99573	-6.66498	0.00637396
TMEM30A	-0.0118988	7.47956	-0.0190991	0.985127	0.995634	-6.98227	0.00650771
TRAPPC12	-0.00226258	5.46613	-0.0189327	0.985257	0.995634	-6.88572	0.00645056
RP11-55K13.1	0.00995816	-1.72403	0.0190193	0.985189	0.995634	-5.77669	0.00648031
TG	0.0170573	-1.3084	0.0189409	0.98525	0.995634	-5.87209	0.0064534
KSR1	-0.00319216	3.26205	-0.0193278	0.984949	0.995546	-6.5601	0.00658621
STAT5B	-0.00819727	5.45584	-0.0195281	0.984793	0.995455	-6.88802	0.00665496
CENPV	-0.00391424	5.29398	-0.0195152	0.984803	0.995455	-6.93078	0.00665055
RP11-368I7.4	0.0122288	-2.58574	0.0195908	0.984744	0.995455	-5.75654	0.00667652
FBXL19-AS1	0.0114068	1.52887	0.0197706	0.984604	0.995421	-6.24589	0.00673827
GSAP	0.035807	-0.828939	0.0198466	0.984545	0.995417	-5.57827	0.00676435
CD46	-0.00560415	7.69725	-0.0199461	0.984468	0.995395	-7.01055	0.00679851
DNM1L	-0.00176505	7.71238	-0.0199877	0.984435	0.995395	-7.03057	0.00681284
ELP4	-0.00343778	4.12164	-0.020193	0.984275	0.995312	-6.71162	0.00688337
LCN1	-0.0234117	-0.338538	-0.020657	0.983914	0.995039	-6.17504	0.00704277
CAST	-0.00723196	6.85512	-0.0207164	0.983868	0.995039	-6.95884	0.00706322
ARL17A	-0.00395208	1.99126	-0.0206107	0.98395	0.995039	-6.24741	0.00702688
RCOR1	-0.00343345	6.05695	-0.0207497	0.983842	0.995039	-6.94939	0.00707463
PSME4	-0.0027328	6.46471	-0.0209564	0.983681	0.995019	-6.93325	0.00714568
GTF2I	0.00244185	8.09675	0.0209197	0.98371	0.995019	-7.05073	0.00713308
ACLY	0.00473161	9.39261	0.0215738	0.9832	0.994615	-7.10842	0.00735794
EHBP1	0.00565226	5.26551	0.0219265	0.982926	0.994393	-6.80952	0.00747928
RFK	-0.0064032	5.90442	-0.0220074	0.982863	0.994385	-6.9588	0.00750709
CFB	-0.0543164	-1.92039	-0.0228005	0.982245	0.994141	-5.5472	0.00778006
PCDHB11	-0.0223416	-0.178936	-0.0228584	0.9822	0.994141	-5.91113	0.00779998
KLHL8	-0.0137045	6.10135	-0.0229907	0.982097	0.994141	-6.9554	0.00784552
ABLIM1	-0.00868681	6.42621	-0.0231324	0.981987	0.994141	-7.01194	0.00789431
LPHN2	-0.00612959	8.50198	-0.0223975	0.982559	0.994141	-6.99079	0.00764135
ECHDC1	-0.00315532	6.08396	-0.0224472	0.98252	0.994141	-6.95082	0.00765845
SMG1	0.00395462	6.60334	0.0223886	0.982566	0.994141	-6.94013	0.00763824
UGP2	0.00480598	5.52573	0.0224718	0.982501	0.994141	-6.78169	0.00766688
AC011747.4	0.00802122	-1.23044	0.022556	0.982436	0.994141	-5.8196	0.00769589
TRIM46	0.00978109	2.73009	0.022577	0.982419	0.994141	-6.478	0.00770311
CCDC88C	0.0111676	0.580459	0.0228689	0.982192	0.994141	-6.66861	0.00780356
CTC-347C20.2	0.0202366	-3.60338	0.0228554	0.982203	0.994141	-5.68987	0.00779893
RP11-90J7.2	0.0219931	-3.85749	0.0227784	0.982262	0.994141	-5.66452	0.00777244
LIN7A	0.0176685	3.92888	0.0234321	0.981754	0.994043	-6.78943	0.00799748
RIC3	0.00401083	2.70478	0.0237303	0.981521	0.993864	-6.37644	0.00810021
SPOCK3	-0.0172278	4.76933	-0.0238169	0.981454	0.993852	-6.97104	0.00813004
RNF149	-0.00289152	5.29187	-0.0239333	0.981363	0.993816	-6.80035	0.00817014
RBM14	-0.00435588	5.61868	-0.0241335	0.981208	0.993714	-6.91691	0.00823912
TRIM5	-0.0107329	3.07812	-0.0242575	0.981111	0.993672	-6.23931	0.00828183
MGAT5	0.0104277	6.66892	0.0243095	0.981071	0.993672	-6.97155	0.00829977
ZNF853	0.0305874	3.33506	0.0244304	0.980976	0.993647	-6.2142	0.00834144
TBRG4	0.00459414	7.2971	0.0245115	0.980913	0.993639	-6.98839	0.00836939
CRYBB1	0.0135081	-3.43901	0.0246697	0.98079	0.99357	-5.79555	0.00842394
FAM163A	-0.00346649	5.80915	-0.0249932	0.980538	0.993371	-6.95377	0.00853546
CCDC69	-0.028589	-0.663852	-0.0251331	0.980429	0.993316	-5.89484	0.0085837
EHD2	0.00671557	1.9939	0.0254155	0.980209	0.993149	-6.2516	0.00868111
SCN2A	-0.019817	3.3996	-0.0256625	0.980017	0.99301	-6.4533	0.00876631
NPFFR2	-0.0265586	-3.03492	-0.0258734	0.979853	0.992899	-5.54713	0.00883906
PRKAG2-AS1	-0.0374232	-0.959409	-0.0260282	0.979733	0.992833	-5.86064	0.00889248
ALDH18A1	0.00378502	7.53999	0.0262114	0.97959	0.992744	-7.01408	0.00895571
DAND5	-0.0460372	-2.2375	-0.0264548	0.9794	0.992718	-5.74877	0.00903972
ARHGAP18	-0.0239386	3.95065	-0.0263153	0.979509	0.992718	-6.51583	0.00899154
GDF11	-0.0179791	5.88102	-0.0263164	0.979508	0.992718	-6.94753	0.00899194
KLLN	-0.0135817	1.61103	-0.0264369	0.979414	0.992718	-6.22209	0.00903354
DNAH5	-0.0266249	0.283434	-0.0266608	0.97924	0.992669	-6.20214	0.00911083
CITED4	-0.0237467	0.680321	-0.0267745	0.979152	0.992635	-5.74959	0.00915009
NELL1	-0.0239853	0.886937	-0.0271995	0.978821	0.992427	-6.64613	0.00929684
ITM2A	-0.0169731	-3.19054	-0.0271078	0.978892	0.992427	-5.81618	0.00926518
GPKOW	-0.00543538	4.63828	-0.0271186	0.978884	0.992427	-6.80554	0.00926891
TMED7	0.00793023	7.07885	0.0271806	0.978835	0.992427	-6.98513	0.00929033
CEL	-0.0201065	-0.879736	-0.0274681	0.978612	0.992421	-5.7878	0.00938965
C9orf69	-0.00289374	5.77907	-0.0273981	0.978666	0.992421	-6.92167	0.00936544
ANXA10	-0.0543164	-1.89908	-0.0275901	0.978517	0.992382	-5.54709	0.00943178
BBX	-0.00681466	7.15496	-0.0277416	0.978399	0.992382	-6.98845	0.00948414
MPV17	-0.00640853	5.24501	-0.0277621	0.978383	0.992382	-6.85144	0.00949123
AMMECR1	0.0102617	5.89052	0.0278061	0.978348	0.992382	-6.93401	0.00950645
DYDC2	0.0153219	-2.1194	0.0276755	0.97845	0.992382	-5.71349	0.00946128
C14orf23	0.0156154	-2.59529	0.0276012	0.978508	0.992382	-5.76309	0.00943562
MRPL24	-0.00578	6.27578	-0.0282497	0.978003	0.992291	-6.92666	0.00965975
REL	0.00779072	2.66049	0.0281282	0.978098	0.992291	-6.27211	0.00961775
RRAS2	0.0159067	4.66217	0.0281461	0.978084	0.992291	-6.56569	0.00962394
PHACTR1	-0.0197174	-3.11223	-0.0283463	0.977928	0.992287	-5.74867	0.00969313
KXD1	-0.0106449	5.93274	-0.0285972	0.977733	0.992264	-6.9299	0.00977988
IRX5	0.00575669	1.8007	0.0284454	0.977851	0.992264	-6.24679	0.00972741
SLC7A2	0.0112105	7.79068	0.0285117	0.977799	0.992264	-7.01796	0.00975031
YOD1	0.0130586	5.88167	0.0285525	0.977767	0.992264	-6.93208	0.00976444
CRYM-AS1	-0.017662	-1.19276	-0.0287983	0.977576	0.992209	-5.73382	0.00984941
RP11-122K13.12	0.0132332	-0.728047	0.0289141	0.977486	0.992173	-5.81369	0.00988947
PCTP	-0.0189676	4.14975	-0.0290204	0.977403	0.992145	-6.65371	0.00992623
CSNK2B	-0.00735638	4.36515	-0.0291259	0.977321	0.992117	-6.71871	0.0099627
AC007228.9	-0.012107	-2.0256	-0.0295259	0.97701	0.992031	-5.80952	0.0101011
BOD1	-0.0027774	6.3155	-0.0293481	0.977148	0.992031	-6.95873	0.0100396
ERGIC3	0.00299974	7.65566	0.0293057	0.977181	0.992031	-6.99666	0.0100249
EIF2S1	0.00502301	8.28245	0.0294407	0.977076	0.992031	-7.04491	0.0100716
CDK2AP2	0.00749523	4.36518	0.0294856	0.977041	0.992031	-6.74881	0.0100872
AP000487.5	0.0228573	0.0609719	0.0297573	0.97683	0.991953	-5.96199	0.0101812
MAP3K8	0.019152	-0.405308	0.0299694	0.976665	0.991842	-5.63478	0.0102546
ENDOV	-0.0208856	3.75663	-0.0303092	0.9764	0.991763	-6.2965	0.0103722
AAGAB	-0.0095503	6.60059	-0.03014	0.976532	0.991763	-6.96647	0.0103136
SUV39H2	0.00815922	5.89101	0.0302557	0.976442	0.991763	-6.93483	0.0103537
CGREF1	0.0233524	3.38842	0.0303201	0.976392	0.991763	-6.88495	0.010376
THBS2	0.0532431	2.93197	0.0302038	0.976482	0.991763	-5.89976	0.0103357
AC007128.1	-0.0176678	-2.37762	-0.030702	0.976094	0.991635	-5.91447	0.0105082
CLSTN3	-0.00773635	4.72565	-0.0306548	0.976131	0.991635	-6.77844	0.0104919
NIPAL4	-0.0543164	-2.91627	-0.0323618	0.974802	0.991629	-5.54696	0.0110834
AC011290.4	-0.0448769	-3.0967	-0.0320074	0.975078	0.991629	-5.64889	0.0109605
AC097724.3	-0.0413788	-1.26622	-0.0323364	0.974822	0.991629	-5.89652	0.0110746
RSAD2	-0.0298073	-0.208739	-0.0319549	0.975119	0.991629	-5.7937	0.0109423
AKAP12	-0.0282178	7.04428	-0.0313559	0.975585	0.991629	-6.99974	0.0107347
RP11-442N24__B.1	-0.0281728	-1.69517	-0.0315702	0.975419	0.991629	-5.7629	0.010809
TMEM237	-0.0257211	7.15173	-0.0321021	0.975005	0.991629	-6.96874	0.0109934
AP000221.1	-0.0204073	-3.32352	-0.0309693	0.975886	0.991629	-5.77492	0.0106008
KLHL23	-0.0145804	6.44193	-0.030804	0.976015	0.991629	-6.95402	0.0105435
FAM155A-IT1	-0.0125269	-1.55942	-0.0324231	0.974755	0.991629	-5.94138	0.0111047
GUF1	-0.0109068	6.2935	-0.0317447	0.975283	0.991629	-6.95873	0.0108695
SMURF2	-0.0103906	5.96189	-0.032105	0.975002	0.991629	-6.84802	0.0109944
LUC7L3	-0.00738851	6.94087	-0.0312985	0.97563	0.991629	-6.97561	0.0107149
ITCH	-0.00723379	6.99656	-0.0311594	0.975738	0.991629	-6.98611	0.0106667
FCF1	-0.00662912	6.30847	-0.0308692	0.975964	0.991629	-6.9369	0.0105661
EDC3	-0.00643314	5.02384	-0.0308573	0.975973	0.991629	-6.82777	0.010562
ZNF462	-0.00399405	6.46705	-0.0313498	0.97559	0.991629	-6.95278	0.0107326
GGNBP2	0.00263005	6.27821	0.0310148	0.975851	0.991629	-6.95591	0.0106166
ZNF829	0.0055032	2.83846	0.0308219	0.976001	0.991629	-6.59761	0.0105498
NAA15	0.00553432	8.35993	0.0315561	0.97543	0.991629	-7.03397	0.0108041
GFPT1	0.00665413	6.56432	0.0316796	0.975333	0.991629	-6.93224	0.0108469
INO80	0.00745469	6.10017	0.0315007	0.975473	0.991629	-6.92938	0.0107849
AARS2	0.00877039	5.76805	0.0309494	0.975902	0.991629	-6.93487	0.0105939
HECA	0.0144594	2.47552	0.031788	0.975249	0.991629	-6.12341	0.0108845
RP11-383I23.2	0.0195893	-2.9349	0.0318577	0.975195	0.991629	-5.75398	0.0109086
MAMDC2-AS1	0.0291236	-3.09848	0.0326357	0.974589	0.991629	-5.7358	0.0111784
FAM159A	0.0379318	-3.34323	0.0309803	0.975878	0.991629	-5.75425	0.0106046
TTLL7	-0.0262316	5.04631	-0.0327743	0.974481	0.991579	-6.83468	0.0112264
BTG1	-0.0102185	5.70397	-0.0328528	0.97442	0.991572	-6.92398	0.0112537
VAPB	0.00277495	6.45707	0.0329902	0.974313	0.991519	-6.96764	0.0113014
LINC00862	-0.0406157	-3.92936	-0.0332212	0.974133	0.991455	-5.54899	0.0113815
RXRB	-0.00513692	4.5078	-0.0331416	0.974195	0.991455	-6.75205	0.0113539
TLK1	-0.00331741	5.49742	-0.0331528	0.974187	0.991455	-6.86733	0.0113578
RP6-99M1.2	-0.0543164	-3.1409	-0.0338304	0.973659	0.991078	-5.54691	0.0115929
HECW2	-0.028119	4.69082	-0.0339449	0.97357	0.991078	-6.62144	0.0116327
AP000442.4	-0.0206461	-2.47033	-0.0342448	0.973337	0.991078	-5.85248	0.0117368
OMA1	-0.0195066	3.25644	-0.0339003	0.973605	0.991078	-6.45789	0.0116172
C12orf60	-0.0156264	2.7918	-0.0340172	0.973514	0.991078	-6.56267	0.0116578
CPSF4	0.0085989	5.17647	0.0340002	0.973527	0.991078	-6.81959	0.0116519
CNTNAP3B	0.021478	-3.56274	0.0341279	0.973428	0.991078	-5.77822	0.0116962
ZNF2	-0.012307	2.73244	-0.0344948	0.973142	0.990943	-6.31699	0.0118236
RP11-464D20.6	-0.0296417	-3.94116	-0.0348995	0.972827	0.990889	-5.54867	0.0119642
RP11-158H5.7	-0.028854	1.1827	-0.0346387	0.97303	0.990889	-6.09725	0.0118736
ABCC2	-0.022472	1.67398	-0.0350134	0.972739	0.990889	-5.96545	0.0120038
CTNNB1	-0.00378677	8.18575	-0.0346341	0.973034	0.990889	-7.04894	0.011872
SMCR8	0.00515229	4.26026	0.0349811	0.972764	0.990889	-6.65148	0.0119926
HSPA14	0.00579679	6.05497	0.034677	0.973001	0.990889	-6.93241	0.0118869
CRAMP1L	0.0063063	2.87943	0.0346327	0.973035	0.990889	-6.39713	0.0118715
IL15	-0.0153575	2.51222	-0.0352673	0.972541	0.99083	-6.13428	0.012092
ZKSCAN7	-0.0100251	2.35304	-0.0352023	0.972592	0.99083	-6.33825	0.0120694
NEAT1	0.0269107	5.99935	0.0354192	0.972423	0.99077	-6.82938	0.0121448
MYLK4	-0.0500326	-1.17364	-0.0357936	0.972132	0.990686	-5.74796	0.012275
KIAA0930	-0.0158484	5.88874	-0.0360563	0.971927	0.990686	-6.95055	0.0123663
LSM7	-0.00470465	5.85333	-0.0355947	0.972286	0.990686	-6.93782	0.0122058
TMEM69	0.00785707	4.75949	0.0359017	0.972047	0.990686	-6.73634	0.0123126
SYF2	0.00929951	5.42564	0.0357731	0.972147	0.990686	-6.84037	0.0122679
USE1	0.0171646	3.68823	0.0356114	0.972273	0.990686	-6.51099	0.0122116
RP11-242F4.2	0.026645	-0.454937	0.0359165	0.972036	0.990686	-5.96884	0.0123177
GJD2	0.0314515	-1.46501	0.0355995	0.972283	0.990686	-6.46346	0.0122075
VDR	-0.0353328	-0.683589	-0.0362509	0.971776	0.990614	-5.69699	0.012434
DOCK10	-0.0330506	3.41962	-0.0362903	0.971745	0.990614	-6.3543	0.0124477
TRIM68	-0.0173117	2.45756	-0.0362758	0.971756	0.990614	-6.18977	0.0124426
NRXN1	-0.016191	2.48658	-0.036453	0.971618	0.990614	-6.7578	0.0125043
VEZF1	-0.0082308	6.57328	-0.0364789	0.971598	0.990614	-6.94493	0.0125133
FAM27C	-0.0227821	-1.54791	-0.0367785	0.971365	0.990548	-5.88839	0.0126175
DMAP1	-0.00525154	3.78025	-0.0366861	0.971437	0.990548	-6.53781	0.0125854
CCSER2	0.0108179	5.43514	0.0367511	0.971386	0.990548	-6.87609	0.012608
CTTN	0.0117319	7.71363	0.0369309	0.971246	0.990548	-7.00192	0.0126706
FGF19	0.019661	-2.10692	0.0368509	0.971309	0.990548	-5.85684	0.0126427
WDFY3-AS2	0.0222516	2.4137	0.0367336	0.9714	0.990548	-6.52888	0.0126019
TSN	-0.00327335	7.06663	-0.0372242	0.971018	0.990457	-6.96863	0.0127726
RP11-218M22.1	-0.0543164	-3.31708	-0.0373009	0.970959	0.990452	-5.54679	0.0127993
PCDHA7	-0.0168436	-0.665347	-0.0374169	0.970868	0.990416	-5.82166	0.0128397
CCDC112	-0.00716773	4.25603	-0.0375338	0.970777	0.99038	-6.69967	0.0128804
POSTN	-0.0543164	-2.57468	-0.0376824	0.970662	0.990335	-5.54678	0.0129321
GLTSCR1L	0.0242598	3.29527	0.0376603	0.970679	0.990335	-6.563	0.0129244
GTF2H5	-0.0159646	3.91261	-0.0379982	0.970416	0.990179	-6.6903	0.0130421
RP11-297D21.4	0.0140151	-0.768352	0.0380315	0.97039	0.990179	-5.91244	0.0130537
RP11-421L21.3	-0.0184241	2.94987	-0.0381901	0.970267	0.990139	-6.64661	0.0131089
DGCR8	-0.00781649	5.51682	-0.0383026	0.970179	0.990105	-6.88969	0.0131481
RP11-703G6.1	0.0260298	-3.56033	0.0383302	0.970158	0.990105	-5.59808	0.0131577
GPR89C	-0.0126319	1.48441	-0.038445	0.970068	0.990104	-6.21586	0.0131977
RP11-700J17.1	0.0281631	-3.51103	0.0386656	0.969897	0.990001	-5.59565	0.0132746
C6orf57	0.0284257	3.39126	0.0386458	0.969912	0.990001	-6.55634	0.0132677
EPM2A	0.0146865	2.52799	0.0388024	0.96979	0.989988	-6.51207	0.0133223
SIPA1L3	-0.0127315	4.27895	-0.0393145	0.969392	0.989687	-6.72532	0.0135007
LINC00431	0.0220098	-3.22059	0.0392522	0.96944	0.989687	-5.68439	0.013479
SRD5A3	-0.0234972	3.91202	-0.03947	0.969271	0.989626	-6.63964	0.0135549
CCDC51	0.00487508	4.23577	0.0394713	0.96927	0.989626	-6.71028	0.0135554
CXCL10	-0.0543164	-3.48672	-0.0396723	0.969113	0.989577	-5.54671	0.0136255
RP11-872D17.4	-0.0227467	-2.80897	-0.0397447	0.969057	0.989577	-5.67587	0.0136507
SKP2	-0.00870475	8.10653	-0.0396887	0.969101	0.989577	-7.03861	0.0136312
TULP3	0.00584978	4.9233	0.0400584	0.968813	0.989508	-6.82352	0.0137601
YBX3	0.0392825	-2.75218	0.0399788	0.968875	0.989508	-5.5467	0.0137323
C4B	0.0713044	0.500159	0.0399718	0.96888	0.989508	-5.89348	0.0137299
ATG5	0.00550385	5.86012	0.0402615	0.968655	0.9895	-6.91771	0.013831
C1orf123	0.0061949	4.44559	0.0401925	0.968708	0.9895	-6.69827	0.0138069
HS3ST1	-0.0543164	-2.61348	-0.0405586	0.968424	0.989321	-5.54668	0.0139346
COLEC12	-0.0853872	1.16265	-0.0413768	0.967787	0.989209	-5.81735	0.0142202
SERTM1	-0.0543164	-2.72681	-0.0413666	0.967795	0.989209	-5.54665	0.0142166
RP11-536O18.1	-0.0543164	-3.80334	-0.0410237	0.968062	0.989209	-5.54666	0.0140969
CCDC30	-0.0473986	0.249081	-0.0409989	0.968081	0.989209	-5.88185	0.0140883
GSTO2	-0.0451296	0.169426	-0.0412824	0.96786	0.989209	-5.98722	0.0141873
C1orf213	-0.0360782	-0.222358	-0.0413503	0.967808	0.989209	-5.8445	0.0142109
CTD-2132N18.2	-0.0341749	-0.795401	-0.0407954	0.968239	0.989209	-5.99239	0.0140173
ALCAM	-0.0229688	8.25122	-0.0418401	0.967427	0.989209	-7.08865	0.014382
MAP1B	-0.0148114	8.31322	-0.0415192	0.967676	0.989209	-7.05354	0.0142699
GTF3A	-0.0128037	7.03247	-0.040909	0.968151	0.989209	-6.9961	0.0140569
SLC25A53	-0.00970293	2.05279	-0.042006	0.967297	0.989209	-6.35168	0.0144399
KIAA1737	-0.00907097	5.05687	-0.040773	0.968257	0.989209	-6.87935	0.0140095
ZNF701	-0.00844404	2.14226	-0.0409986	0.968081	0.989209	-6.34361	0.0140882
KBTBD8	0.00870687	4.17808	0.041849	0.96742	0.989209	-6.76393	0.0143851
C9orf114	0.00955732	5.56402	0.041175	0.967944	0.989209	-6.88994	0.0141498
RIC8B	0.00976197	5.05664	0.041852	0.967417	0.989209	-6.79829	0.0143861
AVEN	0.0100899	3.78461	0.0407704	0.968259	0.989209	-6.62622	0.0140085
NUDT15	0.0121765	5.45774	0.0416464	0.967577	0.989209	-6.87487	0.0143143
RP11-154H23.3	0.0308594	-3.26992	0.0417484	0.967498	0.989209	-5.59854	0.0143499
PXT1	0.0371526	-3.52799	0.0419529	0.967339	0.989209	-5.65523	0.0144214
C10orf111	0.0718272	-2.95182	0.0415975	0.967615	0.989209	-5.64853	0.0142973
C10orf107	-0.0543164	-2.81421	-0.0423436	0.967035	0.989139	-5.54661	0.0145579
TRAPPC2	0.00615114	4.56924	0.0423391	0.967038	0.989139	-6.78079	0.0145563
ARPC1B	0.0153613	5.42162	0.0425063	0.966908	0.989118	-6.80616	0.0146147
UBE2D2	-0.00505626	6.69367	-0.0425799	0.966851	0.989115	-6.97379	0.0146405
LDHC	0.0927059	-3.74249	0.0427464	0.966721	0.989039	-5.66201	0.0146986
ANKRD36	-0.0082278	3.50895	-0.0428259	0.96666	0.989032	-6.47018	0.0147264
COLEC10	-0.0543164	-3.87564	-0.0429538	0.96656	0.98901	-5.54658	0.0147711
GPR1	-0.042191	-1.95562	-0.0429501	0.966563	0.98901	-6.05724	0.0147698
LINC00174	-0.0315778	-0.808175	-0.0432079	0.966362	0.98901	-5.83821	0.01486
DAGLA	-0.0141296	2.47659	-0.0431848	0.96638	0.98901	-6.29436	0.0148519
MED13	-0.00540187	7.84102	-0.0432597	0.966322	0.98901	-7.00813	0.0148781
FAM160B2	0.0094855	4.29252	0.0430346	0.966497	0.98901	-6.68323	0.0147994
AQPEP	0.0369607	-3.61061	0.0429232	0.966584	0.98901	-5.54941	0.0147604
DCLRE1C	-0.0121997	3.56981	-0.0436424	0.966024	0.988886	-6.43312	0.0150119
TAF2	0.0104278	6.93401	0.0435731	0.966078	0.988886	-6.95236	0.0149877
KCNIP4	0.0114607	2.57331	0.0437468	0.965943	0.98886	-6.67895	0.0150484
CD72	-0.053633	-2.22924	-0.0440843	0.965681	0.988851	-5.72154	0.0151665
ZNF219	-0.032536	4.04193	-0.0438284	0.96588	0.988851	-6.61253	0.015077
ZNF707	-0.00976116	3.10741	-0.0439746	0.965766	0.988851	-6.39855	0.0151281
RRP9	-0.00930812	5.00223	-0.0441781	0.965608	0.988851	-6.90653	0.0151993
MBIP	0.00508806	4.04324	0.0438623	0.965853	0.988851	-6.7036	0.0150888
SLC7A6OS	0.00513858	4.62785	0.0438467	0.965865	0.988851	-6.7482	0.0150834
KB-1208A12.3	0.0231376	-2.81229	0.0440815	0.965683	0.988851	-5.71727	0.0151655
UQCRC2	0.0142324	7.94103	0.044376	0.965454	0.988807	-7.05185	0.0152686
LINC00618	-0.0380596	-2.10069	-0.0446594	0.965233	0.988658	-5.76615	0.0153677
SNX29	-0.0165394	3.98038	-0.0446347	0.965252	0.988658	-6.63464	0.0153591
RPL29	0.00853077	8.85311	0.0447546	0.965159	0.988658	-7.08047	0.0154011
RP11-797A18.6	0.0190468	-0.753297	0.0448771	0.965064	0.988658	-5.9227	0.0154439
C9orf117	0.0459812	-3.6047	0.0446989	0.965203	0.988658	-5.66443	0.0153816
KIAA2022	-0.0403183	-4.05918	-0.0455424	0.964546	0.988622	-5.65605	0.0156769
IFITM2	-0.0371796	-0.343933	-0.0452711	0.964757	0.988622	-5.63239	0.0155819
GMPR	-0.0340652	0.727082	-0.0456571	0.964457	0.988622	-5.84913	0.0157171
CALCOCO1	-0.0169197	3.60223	-0.0454096	0.96465	0.988622	-6.55744	0.0156304
C6orf132	-0.0136599	-2.86631	-0.045032	0.964943	0.988622	-6.11738	0.0154982
PGGT1B	-0.00559328	5.43288	-0.0451524	0.96485	0.988622	-6.89418	0.0155403
SLC25A26	0.00476271	4.77104	0.0454035	0.964654	0.988622	-6.79213	0.0156283
ZNF615	0.011172	3.38965	0.045087	0.964901	0.988622	-6.59907	0.0155174
PPP1R21	0.012432	3.29305	0.0451944	0.964817	0.988622	-6.37285	0.015555
SLX1B	0.0278606	3.06653	0.0450701	0.964914	0.988622	-6.34817	0.0155115
CACTIN	-0.00580558	5.31764	-0.0458559	0.964302	0.988565	-6.86925	0.0157867
TOMM40L	0.0318584	4.86065	0.0458073	0.96434	0.988565	-6.81772	0.0157697
C9orf156	-0.0106003	3.59653	-0.0460244	0.964171	0.988505	-6.6408	0.0158458
AGAP9	0.0124477	0.892778	0.0460958	0.964116	0.988505	-6.0055	0.0158708
EFCAB6	0.0442288	0.526597	0.0460391	0.96416	0.988505	-5.98833	0.0158509
RP11-588K22.2	0.0213298	3.93796	0.0462423	0.964002	0.988499	-6.75488	0.0159221
SCLT1	-0.00734776	5.52088	-0.0465295	0.963779	0.988326	-6.90017	0.0160227
IL1RN	-0.0543164	-3.52775	-0.046706	0.963641	0.988242	-5.54643	0.0160847
EPHA2	-0.050103	4.99278	-0.0467416	0.963614	0.988242	-6.5072	0.0160971
DTX4	-0.0240455	0.678219	-0.0467176	0.963632	0.988242	-6.08812	0.0160887
ZDHHC24	-0.00655688	3.728	-0.046968	0.963437	0.988242	-6.68237	0.0161765
CAPZA2	0.0080317	7.38632	0.0468108	0.96356	0.988242	-7.01672	0.0161214
NUDT18	-0.0100177	0.943554	-0.0472594	0.963211	0.988081	-6.06705	0.0162787
FANK1	0.0670403	-2.09738	0.0474636	0.963052	0.987975	-5.54639	0.0163503
PRKCDBP	-0.0543164	-3.19937	-0.0480433	0.962601	0.987733	-5.54637	0.0165537
C22orf26	-0.0222614	-1.14551	-0.0482	0.962479	0.987733	-5.88117	0.0166086
AIDA	-0.0217921	6.14939	-0.0486465	0.962132	0.987733	-6.90949	0.0167654
RP11-435O5.2	-0.0211346	-0.339719	-0.0480789	0.962573	0.987733	-5.99488	0.0165662
PSMB7	-0.0094791	7.83718	-0.0482488	0.962441	0.987733	-7.02229	0.0166258
SAP130	-0.00810112	4.03418	-0.0479206	0.962696	0.987733	-6.50127	0.0165106
WDR5	0.00799926	6.15832	0.0487173	0.962077	0.987733	-6.93054	0.0167902
WBSCR22	0.00872908	6.31134	0.0483616	0.962353	0.987733	-6.95703	0.0166654
PSMA5	0.00937866	7.41865	0.0485297	0.962223	0.987733	-7.00098	0.0167244
RP11-57H14.4	0.0226063	1.55503	0.048794	0.962017	0.987733	-6.09061	0.0168172
RP11-142I20.1	0.0251659	-4.34987	0.0484301	0.9623	0.987733	-5.72701	0.0166894
RP11-589P10.5	0.0362247	-3.43321	0.0478918	0.962719	0.987733	-5.61451	0.0165005
RP11-697E2.6	0.0568627	-2.94354	0.0478362	0.962762	0.987733	-5.66839	0.016481
CFH	0.0649344	0.174096	0.0480099	0.962627	0.987733	-6.04462	0.016542
ZBTB20-AS4	0.0657931	-3.55684	0.0484232	0.962306	0.987733	-5.64628	0.016687
EOGT	-0.0202991	4.96261	-0.0489652	0.961884	0.987675	-6.82842	0.0168773
AP000230.1	-0.0423694	-2.80999	-0.0493343	0.961597	0.98766	-5.81399	0.0170069
TSR2	-0.0290224	5.04629	-0.049167	0.961727	0.98766	-6.8641	0.0169482
CHURC1	-0.00605855	4.71866	-0.0490776	0.961797	0.98766	-6.79319	0.0169168
RAB28	0.0137655	4.29897	0.0492696	0.961647	0.98766	-6.68713	0.0169842
CYP4V2	0.0496251	2.43793	0.0490544	0.961815	0.98766	-6.14207	0.0169086
FAM228B	0.0501792	1.79573	0.0491711	0.961724	0.98766	-6.15828	0.0169496
AADAC	-0.0543164	-3.63258	-0.049943	0.961124	0.987621	-5.54628	0.0172208
ABHD6	-0.00725805	3.4127	-0.0495907	0.961398	0.987621	-6.59566	0.017097
SARS	0.0107107	7.6035	0.0495829	0.961404	0.987621	-7.05668	0.0170942
D2HGDH	0.0150311	3.70333	0.0498314	0.96121	0.987621	-6.66586	0.0171816
PHKG1	0.0162851	-1.54908	0.0495725	0.961412	0.987621	-5.81011	0.0170906
SPAG17	0.021171	-2.23047	0.0495265	0.961448	0.987621	-5.73778	0.0170744
SLC26A10	0.0400253	-0.00769896	0.0497913	0.961242	0.987621	-5.95396	0.0171674
CCDC109B	-0.0417295	1.87457	-0.0500914	0.961008	0.987568	-5.81507	0.0172729
RP11-245P10.4	-0.0362736	-2.52896	-0.0502042	0.96092	0.987568	-5.64503	0.0173126
GRIA1	-0.0211413	-3.2001	-0.0502959	0.960849	0.987568	-5.95723	0.0173448
AKAP8	0.0164317	5.43514	0.0501358	0.960974	0.987568	-6.88743	0.0172885
ENO2	0.0315059	6.25758	0.0503158	0.960834	0.987568	-6.98444	0.0173518
RP11-253M7.1	0.0464983	-0.808816	0.0500848	0.961013	0.987568	-5.86495	0.0172706
NFE4	-0.0543164	-1.81687	-0.0506055	0.960608	0.98749	-5.54625	0.0174536
MAML1	0.00949092	5.29719	0.0506273	0.960591	0.98749	-6.87069	0.0174613
TMX3	-0.0175692	6.40495	-0.0507599	0.960488	0.987479	-6.90704	0.0175079
RP11-221N13.3	-0.0543164	-3.28805	-0.050966	0.960328	0.987424	-5.54623	0.0175804
CTB-50L17.7	-0.0329351	-2.4292	-0.0509361	0.960351	0.987424	-5.71588	0.0175699
ARHGAP12	-0.0100156	5.77497	-0.0510522	0.960261	0.987424	-6.83259	0.0176107
NDUFC2	0.00992769	4.92756	0.0509961	0.960305	0.987424	-6.91393	0.017591
RP11-306I1.2	0.056789	-4.04944	0.0508986	0.96038	0.987424	-5.57799	0.0175567
RP11-445H22.4	-0.025419	-0.823782	-0.0512817	0.960082	0.987399	-5.93227	0.0176915
HAUS7	-0.0223871	-0.792195	-0.0513382	0.960039	0.987399	-5.90198	0.0177113
AGPAT6	0.00877978	6.93314	0.0515822	0.959849	0.98731	-6.99553	0.0177972
IGFLR1	0.0236516	-3.08555	0.0515549	0.95987	0.98731	-5.59811	0.0177876
CCDC180	0.0755224	-3.42691	0.0515346	0.959886	0.98731	-5.5992	0.0177804
SSBP3	-0.0347902	5.18872	-0.051895	0.959606	0.98719	-6.88957	0.0179072
U2AF1	-0.0149017	6.44983	-0.0520034	0.959521	0.98716	-6.96585	0.0179454
FKBP14	-0.0163993	6.45925	-0.0523523	0.95925	0.986937	-6.93965	0.0180682
RP11-474P2.2	-0.0263527	-3.37571	-0.0525206	0.959119	0.986901	-5.64876	0.0181275
RCL1	0.0127368	4.68847	0.0524987	0.959136	0.986901	-6.86611	0.0181198
FNDC3A	0.0397823	8.25081	0.0524677	0.95916	0.986901	-7.05951	0.0181088
TGIF1	-0.0446355	3.48855	-0.0527212	0.958963	0.986867	-6.34402	0.0181981
ZNF414	-0.0113887	1.82083	-0.0528064	0.958897	0.986855	-6.27734	0.0182281
DYNC1LI2	-0.0195639	7.43712	-0.0529123	0.958815	0.986827	-7.00574	0.0182654
SULT1B1	-0.0543164	-2.34974	-0.0533488	0.958475	0.986571	-5.54612	0.0184192
F2RL2	-0.0543164	-3.1018	-0.0533022	0.958511	0.986571	-5.54612	0.0184027
SERINC4	0.0733441	-2.80684	0.0534788	0.958374	0.986542	-5.63517	0.0184649
IKZF5	0.00578851	4.14947	0.0535565	0.958314	0.986536	-6.72906	0.0184924
ALOX5AP	-0.0257041	-1.99594	-0.0538677	0.958072	0.986344	-5.86559	0.018602
ZNF236	-0.0161327	3.98971	-0.0541311	0.957867	0.986189	-6.52569	0.0186949
CCL20	-0.0543164	-2.87462	-0.054511	0.957571	0.986023	-5.54606	0.0188288
MST1R	-0.0531422	-3.67595	-0.0544093	0.957651	0.986023	-5.64805	0.0187929
MAP3K14-AS1	0.0901096	0.149557	0.0544131	0.957648	0.986023	-5.90116	0.0187943
CORO1C	0.0284864	8.05612	0.0546631	0.957453	0.985988	-7.03508	0.0188824
SREBF2	0.00447623	6.85339	0.0548412	0.957315	0.985984	-7.00979	0.0189452
YEATS2-AS1	0.0601432	-3.58851	0.0547454	0.957389	0.985984	-5.54771	0.0189115
C1orf145	0.0824758	-1.58133	0.054739	0.957394	0.985984	-5.72778	0.0189092
TMEM206	-0.0143473	5.56867	-0.0549591	0.957223	0.985976	-6.86342	0.0189868
MTMR7	-0.0101281	1.92433	-0.0550288	0.957169	0.985976	-6.40145	0.0190114
RP11-1006G14.4	-0.0197068	1.62403	-0.0552285	0.957014	0.985907	-6.16154	0.0190819
CRY1	0.0228471	4.88752	0.0551862	0.957047	0.985907	-6.80789	0.0190669
RP11-1008C21.2	-0.0253936	-2.24767	-0.0553974	0.956882	0.985851	-5.80409	0.0191415
CASP9	0.010468	2.85776	0.0555011	0.956802	0.985824	-6.27274	0.0191781
LYPD3	0.0392825	-3.53298	0.0556748	0.956667	0.985741	-5.546	0.0192394
CDCP1	-0.0543164	-3.37713	-0.0558262	0.956549	0.985713	-5.54599	0.0192928
NOL10	-0.0129047	6.4126	-0.0557804	0.956585	0.985713	-6.94809	0.0192766
AQP10	-0.0368127	1.08897	-0.0562869	0.956191	0.98542	-6.46357	0.0194555
FAM179B	-0.0136167	5.89641	-0.0564414	0.956071	0.985352	-6.92703	0.01951
DHX36	0.00533208	6.92384	0.0565273	0.956004	0.985352	-6.9802	0.0195404
RABL2B	0.0097328	2.99224	0.0564505	0.956064	0.985352	-6.37731	0.0195132
CTD-2213F21.2	0.0411291	-2.94138	0.0564895	0.956033	0.985352	-5.6471	0.019527
RP11-1246C19.1	-0.0185299	1.75131	-0.0568559	0.955748	0.985245	-5.9592	0.0196564
RP1-261G23.7	0.0371332	-2.40422	0.0568888	0.955723	0.985245	-5.7727	0.019668
ZNF474	-0.046274	-1.91132	-0.057069	0.955583	0.985187	-5.72869	0.0197317
ENO3	-0.022492	3.20623	-0.0572455	0.955446	0.98516	-6.41872	0.019794
ENAH	-0.017008	8.30018	-0.0571726	0.955502	0.98516	-7.03916	0.0197683
FAM195B	0.0118897	6.21488	0.0571906	0.955488	0.98516	-6.93651	0.0197746
RP11-434D12.1	-0.0429877	-2.76522	-0.0574483	0.955288	0.985108	-5.66138	0.0198657
MORF4L1	-0.0107092	8.31978	-0.0575526	0.955207	0.985081	-7.0618	0.0199026
ZNF572	-0.0173247	1.71472	-0.0576815	0.955107	0.985034	-6.32575	0.0199481
FAM53A	0.0834961	-0.568389	0.0577521	0.955052	0.985034	-5.95038	0.0199731
OXCT1-AS1	-0.063988	-3.08319	-0.0581191	0.954767	0.984796	-5.69503	0.0201028
LACE1	-0.0159826	3.50417	-0.0581891	0.954712	0.984796	-6.56143	0.0201276
RASGRP1	-0.0672099	-0.94359	-0.0584204	0.954532	0.984688	-5.79367	0.0202094
NADSYN1	-0.00802521	4.40861	-0.0585153	0.954458	0.984688	-6.62077	0.020243
CTD-2619J13.16	0.0221038	1.01714	0.0583939	0.954553	0.984688	-6.09784	0.0202
RP1-266L20.9	0.0243195	-2.48675	0.0586379	0.954363	0.984688	-5.7674	0.0202863
ANKRD23	0.030568	-1.58295	0.0585632	0.954421	0.984688	-5.72638	0.0202599
F2RL1	-0.117201	-1.15367	-0.0589144	0.954148	0.984552	-5.54582	0.0203841
RPRM	-0.0543164	-2.86479	-0.0590633	0.954033	0.984489	-5.54582	0.0204368
SOCS7	-0.0186129	3.73067	-0.0593763	0.953789	0.984399	-6.61846	0.0205476
RP11-423P10.2	-0.0184349	-0.551794	-0.0595596	0.953647	0.984399	-5.91427	0.0206125
DDX18	0.0122663	7.68363	0.0594942	0.953698	0.984399	-6.98368	0.0205893
TARBP2	0.013582	5.80152	0.0592842	0.953861	0.984399	-6.92794	0.020515
RP4-740C4.6	0.0205441	0.177596	0.0594393	0.95374	0.984399	-5.92507	0.0205699
IGFN1	0.129925	-2.61281	0.0592459	0.953891	0.984399	-5.54581	0.0205014
CHMP4B	-0.0268712	5.41258	-0.0597236	0.953519	0.984354	-6.83297	0.0206705
STK32B	-0.0708256	0.989152	-0.0599998	0.953305	0.984188	-5.88811	0.0207683
CTA-714B7.5	-0.0422267	-2.30363	-0.0602392	0.953119	0.984053	-5.96978	0.0208531
AC097468.4	-0.0697282	-2.12715	-0.0604433	0.95296	0.983945	-5.99407	0.0209253
RPL27	-0.00466549	9.98455	-0.0609055	0.952601	0.983631	-7.12146	0.0210891
SNAPC5	-0.0210092	5.0585	-0.0610642	0.952477	0.98356	-6.83237	0.0211453
RP11-879F14.2	-0.0543164	-4.00782	-0.0612553	0.952329	0.983487	-5.54569	0.0212131
SPOP	-0.0413527	5.70656	-0.0612296	0.952349	0.983487	-6.90747	0.0212039
RP5-837J1.2	-0.00639595	4.5379	-0.0612423	0.952339	0.983487	-6.8574	0.0212084
AARS	0.00918514	7.3243	0.0614157	0.952204	0.983487	-7.01925	0.0212699
POLG2	0.0163422	4.26204	0.0612244	0.952353	0.983487	-6.63588	0.0212021
LRRTM4	0.122569	0.0952869	0.0613889	0.952225	0.983487	-5.83672	0.0212604
AHI1	0.00727482	4.29157	0.0617838	0.951918	0.983376	-6.79971	0.0214004
TMEM136	-0.0183097	3.68128	-0.0621773	0.951612	0.983154	-6.76926	0.0215399
SLC18B1	-0.00902248	0.735606	-0.0621322	0.951647	0.983154	-6.80953	0.0215239
CRLS1	0.0106162	6.01712	0.0621313	0.951648	0.983154	-6.93683	0.0215236
LINC00992	-0.0510429	-1.99536	-0.062711	0.951198	0.983074	-6.05916	0.0217293
TMEM249	-0.0442254	-0.307289	-0.0626246	0.951265	0.983074	-5.78124	0.0216986
ZNF71	-0.0151557	4.25423	-0.062441	0.951407	0.983074	-6.664	0.0216335
RP11-34D15.2	0.0335464	-3.27683	0.0625318	0.951337	0.983074	-5.67425	0.0216657
LINC00467	0.0374832	3.20411	0.0624691	0.951386	0.983074	-6.50288	0.0216434
SMIM3	-0.0497823	4.8759	-0.0630811	0.95091	0.983061	-6.47622	0.0218606
TBXAS1	-0.0249909	0.488016	-0.0628076	0.951123	0.983061	-5.95549	0.0217635
C10orf88	-0.0153802	4.32051	-0.0629337	0.951025	0.983061	-6.7027	0.0218083
HYPK	0.0278717	0.400876	0.0629053	0.951047	0.983061	-5.99745	0.0217982
LINC00158	0.0442693	-3.37267	0.0628667	0.951077	0.983061	-5.69512	0.0217845
RP11-372K14.2	0.0361068	0.0336065	0.0631793	0.950834	0.983044	-6.10669	0.0218954
HAS3	0.0228295	-0.450056	0.0633474	0.950703	0.982965	-5.84318	0.0219551
MAGEC1	-0.0543164	-4.05656	-0.0634425	0.950629	0.982945	-5.54557	0.0219889
CTD-2199O4.6	0.0426298	-3.24362	0.0634506	0.950623	0.982945	-5.61851	0.0219917
C4A	0.10971	1.20057	0.0634684	0.950609	0.982945	-5.97732	0.0219981
AP3M2	-0.0167106	5.52639	-0.063705	0.950425	0.982903	-6.89754	0.0220821
RP11-466F5.8	0.0213954	0.535265	0.064132	0.950093	0.982617	-6.01706	0.0222337
HCG11	-0.0939577	2.10988	-0.0649631	0.949448	0.982556	-5.91985	0.022529
TMEM176A	-0.0850306	-0.694485	-0.0642821	0.949977	0.982556	-5.54552	0.022287
AC096559.1	-0.0644796	-1.64004	-0.0644955	0.949811	0.982556	-6.15902	0.0223628
TWIST2	-0.0543164	-2.08843	-0.0650801	0.949357	0.982556	-5.54547	0.0225706
CXorf49	-0.0543164	-2.81414	-0.0643371	0.949934	0.982556	-5.54551	0.0223065
DDTL	-0.017333	3.62282	-0.0642782	0.94998	0.982556	-6.61747	0.0222856
ATF7IP2	-0.0171316	-1.42486	-0.0647494	0.949614	0.982556	-6.55071	0.022453
PCOLCE2	-0.0115839	1.77264	-0.0644604	0.949838	0.982556	-6.89953	0.0223504
ATXN10	0.00705223	6.95878	0.065367	0.949134	0.982556	-7.00516	0.0226726
STARD9	0.0080095	4.37891	0.0643817	0.949899	0.982556	-6.7598	0.0223224
USP10	0.00930156	7.0026	0.0650848	0.949353	0.982556	-7.0146	0.0225723
TAF3	0.0166539	3.95293	0.0646165	0.949717	0.982556	-6.6775	0.0224058
UBR1	0.0193826	6.5297	0.0647199	0.949637	0.982556	-6.96446	0.0224425
SGIP1	0.0479563	3.25244	0.0647631	0.949603	0.982556	-6.52444	0.0224579
RP11-119K6.6	0.049273	-3.75231	0.0650221	0.949402	0.982556	-5.61841	0.02255
SLC9A7	0.0575832	0.304771	0.0650193	0.949404	0.982556	-5.8566	0.022549
MCF2L-AS1	0.0704407	-2.94749	0.0648452	0.949539	0.982556	-5.7999	0.0224871
SCARB2	0.0163855	7.87016	0.0655155	0.949018	0.982519	-7.03949	0.0227253
CHST1	-0.0832961	0.598553	-0.0656144	0.948942	0.982496	-6.02156	0.0227605
TMEM74B	-0.0543164	-4.20703	-0.0656576	0.948908	0.982496	-5.54543	0.0227759
CTD-2006C1.12	-0.0416201	-3.12196	-0.0657445	0.948841	0.982496	-5.68437	0.0228068
EIF4A3	-0.00679244	7.21437	-0.0656213	0.948936	0.982496	-6.97892	0.022763
OXNAD1	0.0124769	3.86204	0.0657152	0.948863	0.982496	-6.68655	0.0227964
IFNAR1	0.0217214	5.58396	0.0659279	0.948698	0.982496	-6.90726	0.022872
COL3A1	-0.0376416	6.73226	-0.0663356	0.948381	0.982284	-6.31627	0.023017
STRIP1	0.0224399	5.45218	0.0662986	0.94841	0.982284	-6.88818	0.0230039
KCNK1	-0.0543164	-0.399434	-0.0667543	0.948056	0.982077	-5.54536	0.023166
TSPAN8	-0.0492729	4.00672	-0.0666958	0.948101	0.982077	-6.64329	0.0231452
CTD-2127H9.1	-0.0543164	-3.79395	-0.0670346	0.947838	0.982071	-5.54535	0.0232658
TSPAN32	-0.0542777	-2.66692	-0.066961	0.947895	0.982071	-5.87115	0.0232396
SBNO2	0.0131784	5.25176	0.0668429	0.947987	0.982071	-6.83443	0.0231975
C9orf9	0.0482365	2.12078	0.0668557	0.947977	0.982071	-6.30776	0.0232021
RP6-109B7.5	0.0644154	-2.76091	0.0669648	0.947892	0.982071	-5.66304	0.0232409
RP11-340F14.5	-0.0606002	-1.98512	-0.0677802	0.947259	0.981776	-5.97882	0.0235312
KLF1	-0.0525938	-2.21402	-0.0678694	0.94719	0.981776	-5.76096	0.023563
RP11-834C11.3	-0.0468765	-3.58561	-0.0676636	0.94735	0.981776	-5.82323	0.0234897
FAM27E2	-0.0308526	-1.20023	-0.0677748	0.947263	0.981776	-5.90513	0.0235293
PALB2	-0.00943001	5.33315	-0.0676032	0.947397	0.981776	-6.86308	0.0234682
RPP38	0.0109224	4.07596	0.0682232	0.946915	0.981776	-6.64695	0.023689
ZNF75A	0.0148153	5.1975	0.068157	0.946966	0.981776	-6.87555	0.0236655
ACAT2	0.0192662	6.29187	0.0675918	0.947405	0.981776	-6.97528	0.0234641
DUSP26	0.0257877	2.53948	0.0675601	0.94743	0.981776	-6.88361	0.0234529
C6orf163	0.0339254	-0.661636	0.0675721	0.947421	0.981776	-5.98451	0.0234572
EPHX2	0.0342102	3.55639	0.068314	0.946844	0.981776	-6.72578	0.0237214
PCDH20	0.0620682	3.29935	0.0679099	0.947158	0.981776	-6.39848	0.0235774
AC108025.2	-0.0894985	-3.25468	-0.0685017	0.946699	0.981756	-5.62109	0.0237883
MYCBP2-AS1	-0.064354	-3.49199	-0.0684266	0.946757	0.981756	-5.68835	0.0237615
SCRN3	-0.0184783	4.51698	-0.0684752	0.946719	0.981756	-6.68337	0.0237788
ZNF385A	0.0238641	1.49466	0.0690073	0.946306	0.981457	-6.20677	0.0239684
RUNX2	-0.0543164	-1.3519	-0.069086	0.946245	0.98145	-5.54522	0.0239965
C15orf48	-0.0827112	-1.546	-0.0692716	0.946101	0.981357	-5.62185	0.0240627
SF3A1	-0.0191172	6.06018	-0.0694009	0.946	0.981309	-6.92792	0.0241088
LINC00682	-0.0429328	3.38116	-0.0695095	0.945916	0.981295	-6.67123	0.0241475
GTF3C5	-0.00946528	6.46796	-0.0695893	0.945854	0.981295	-6.95918	0.024176
MBTD1	0.0212422	5.66374	0.0694888	0.945932	0.981295	-6.89395	0.0241401
SPOCK1	0.0334234	-0.170688	0.0697692	0.945714	0.981238	-6.11062	0.0242401
ADPGK-AS1	-0.060955	-2.77952	-0.0698973	0.945615	0.981215	-5.69535	0.0242858
B3GAT3	-0.0389242	5.42139	-0.0699687	0.945559	0.981215	-6.82871	0.0243113
GPR137	-0.0180791	3.24573	-0.0700665	0.945483	0.981215	-6.34614	0.0243462
RP11-61A14.2	0.0210983	0.661204	0.0698676	0.945638	0.981215	-6.17377	0.0242752
IPCEF1	0.0232442	-3.5274	0.0700505	0.945496	0.981215	-5.93911	0.0243405
VAT1L	-0.202143	1.18905	-0.0707514	0.944951	0.981214	-5.65096	0.0245906
RERGL	-0.0543164	-3.66803	-0.0702852	0.945313	0.981214	-5.54514	0.0244242
KIFC2	-0.0336047	2.78474	-0.0702192	0.945365	0.981214	-6.09976	0.0244007
LIN54	-0.0280159	5.47678	-0.0704705	0.945169	0.981214	-6.89463	0.0244903
CTD-2619J13.17	-0.027081	2.18604	-0.0705062	0.945142	0.981214	-6.27347	0.0245031
RAB6C	-0.0256963	-1.41391	-0.0705046	0.945143	0.981214	-5.91861	0.0245025
NDUFS2	-0.0193979	6.91301	-0.0702944	0.945306	0.981214	-6.96788	0.0244275
RNF115	0.00631063	5.91262	0.0706446	0.945034	0.981214	-6.92289	0.0245525
WWP1	0.0313852	4.62867	0.0703124	0.945292	0.981214	-6.83957	0.0244339
TECTA	0.0333972	0.274695	0.0709719	0.94478	0.981214	-6.14956	0.0246693
PNPLA3	0.0577261	0.870903	0.0704547	0.945182	0.981214	-5.91573	0.0244847
AC012358.8	0.123609	-2.7922	0.0703527	0.945261	0.981214	-5.62716	0.0244483
DPP4	-0.0543164	-2.30638	-0.0711016	0.944679	0.98118	-5.54508	0.0247156
LTBR	-0.12912	1.39906	-0.07119	0.944611	0.981166	-5.67815	0.0247472
HERC1	0.0115353	6.67032	0.0712377	0.944574	0.981166	-6.97001	0.0247642
RP11-80A15.1	0.0580808	-3.24046	0.0712113	0.944594	0.981166	-5.6667	0.0247548
RP11-166D19.1	-0.0358853	3.02278	-0.0715642	0.94432	0.981083	-6.30252	0.0248808
SMDT1	0.0112518	4.34655	0.0715069	0.944365	0.981083	-6.87445	0.0248603
RP11-461L13.3	0.0485977	-3.30428	0.0715028	0.944368	0.981083	-5.62509	0.0248589
RP11-247C2.2	-0.0854629	-1.34279	-0.0720275	0.94396	0.981007	-5.60852	0.0250463
SLC19A3	-0.0514384	-2.6811	-0.0721627	0.943855	0.981007	-5.62225	0.0250946
RP11-1348G14.5	-0.0311488	-2.3449	-0.0718066	0.944132	0.981007	-5.74695	0.0249674
RBM22	-0.0293535	5.64392	-0.0722183	0.943812	0.981007	-6.90832	0.0251145
TBC1D32	-0.0210946	3.12625	-0.072004	0.943978	0.981007	-6.58264	0.0250379
ZRSR2	-0.0168584	2.77752	-0.0718319	0.944112	0.981007	-6.44189	0.0249764
PAK2	-0.0108922	6.49637	-0.0721357	0.943876	0.981007	-6.95509	0.0250849
KIAA2013	0.00967286	6.13126	0.0718159	0.944125	0.981007	-6.9082	0.0249707
ZZEF1	0.0125001	4.86495	0.071888	0.944069	0.981007	-6.82794	0.0249965
SNX24	0.026157	4.04077	0.072245	0.943791	0.981007	-6.66255	0.025124
RP1-266L20.4	0.0535249	-1.42598	0.0718988	0.94406	0.981007	-5.96741	0.0250003
LL09NC01-139C3.1	0.0943231	-2.35871	0.0718171	0.944124	0.981007	-5.73456	0.0249711
RP11-134O21.1	-0.0543164	-3.38026	-0.0733247	0.942953	0.980957	-5.54494	0.02551
RP11-510C10.4	-0.0543164	-3.3123	-0.072988	0.943214	0.980957	-5.54496	0.0253896
DENR	-0.0258119	7.48348	-0.0728296	0.943337	0.980957	-6.9868	0.025333
VMP1	-0.0205874	7.06777	-0.0727099	0.94343	0.980957	-6.9583	0.0252902
ARL8A	-0.0124306	4.4525	-0.0729137	0.943272	0.980957	-6.64886	0.025363
NBPF11	-0.011637	3.97687	-0.0729339	0.943256	0.980957	-6.51445	0.0253702
DEDD	0.0112426	5.22393	0.073144	0.943093	0.980957	-6.81752	0.0254453
PCDHGA11	0.0288618	1.93721	0.0730288	0.943183	0.980957	-5.89801	0.0254042
CTD-2530H12.4	0.0385864	-3.40741	0.0731844	0.943062	0.980957	-5.7341	0.0254598
STC1	0.0857588	4.64975	0.0727273	0.943417	0.980957	-6.80012	0.0252964
RP11-98D18.3	-0.0326229	-2.38836	-0.0734834	0.94283	0.980897	-5.8569	0.0255667
TLR4	-0.100236	2.25023	-0.0736459	0.942704	0.980852	-6.13005	0.0256249
VMAC	-0.0419549	0.426748	-0.0736097	0.942732	0.980852	-5.879	0.0256119
LRRC37A2	0.0131379	3.22584	0.0737573	0.942617	0.980846	-6.34496	0.0256647
DIRC2	0.0353713	4.32394	0.0738697	0.94253	0.980812	-6.71967	0.0257049
ASPHD2	-0.018495	2.60021	-0.0740409	0.942397	0.98073	-6.34329	0.0257662
XXbac-BPG55C20.7	-0.0275061	-1.1604	-0.0744678	0.942065	0.980553	-5.86732	0.025919
LMNB2	-0.0113859	7.84809	-0.0743298	0.942173	0.980553	-7.00623	0.0258695
NDUFA6	0.014457	6.38749	0.0743458	0.94216	0.980553	-6.98983	0.0258753
DOCK2	-0.147915	-0.507749	-0.0746176	0.941949	0.980493	-5.59153	0.0259726
RP11-475I24.8	-0.0543164	-4.09775	-0.0746142	0.941952	0.980493	-5.54485	0.0259713
PHF20L1	-0.0266958	6.56592	-0.0747924	0.941813	0.980493	-6.94905	0.0260352
FRS3	-0.0189898	2.3162	-0.0746718	0.941907	0.980493	-6.33259	0.025992
FAM8A1	-0.00797338	6.24671	-0.0748937	0.941735	0.980493	-6.94969	0.0260714
ZHX3	0.0102531	4.74811	0.0748536	0.941766	0.980493	-6.82499	0.0260571
TMEM5	0.0257666	5.16585	0.0746737	0.941906	0.980493	-6.86515	0.0259926
LYN	0.00898162	5.97478	0.0751645	0.941524	0.980444	-6.99452	0.0261684
GNPNAT1	-0.0234429	7.35958	-0.0754016	0.94134	0.980377	-7.00355	0.0262533
OSBPL2	-0.0205133	4.8714	-0.0753182	0.941405	0.980377	-6.83442	0.0262234
THAP2	0.0397724	4.11653	0.0753623	0.941371	0.980377	-6.68204	0.0262392
NKX2-6	-0.0543164	-4.19235	-0.0756872	0.941119	0.980362	-5.54477	0.0263556
RP11-298J20.4	-0.0541432	-2.36147	-0.0763498	0.940604	0.980362	-5.70869	0.0265931
RP11-102L12.2	-0.0510527	-2.59692	-0.0761954	0.940724	0.980362	-5.69345	0.0265377
CTD-2340D6.1	-0.0464359	-3.61799	-0.0759603	0.940907	0.980362	-5.64362	0.0264534
PCDH19	-0.041618	-0.275453	-0.0763098	0.940635	0.980362	-6.60346	0.0265787
OLFM3	-0.0355365	2.75161	-0.0758629	0.940982	0.980362	-6.95132	0.0264186
DDN	-0.0278143	4.052	-0.0771049	0.940018	0.980362	-6.87903	0.0268638
TBC1D15	-0.0235983	5.17209	-0.0758426	0.940998	0.980362	-6.85792	0.0264113
UBE2V1	-0.0203734	1.19516	-0.0767676	0.94028	0.980362	-6.12034	0.0267428
CASP4	-0.0201379	3.62187	-0.0762779	0.94066	0.980362	-6.34552	0.0265673
CORO6	-0.0184675	1.393	-0.0767025	0.940331	0.980362	-6.1841	0.0267195
ZNF816	-0.0155532	1.18976	-0.07562	0.941171	0.980362	-6.41184	0.0263315
ZNF146	-0.0104144	8.22922	-0.0755796	0.941202	0.980362	-7.03801	0.0263171
PHF14	-0.00652047	7.40063	-0.0761638	0.940749	0.980362	-7.00417	0.0265264
ETFA	0.0112484	7.15304	0.0768612	0.940207	0.980362	-7.00936	0.0267764
WDR12	0.0115641	7.10611	0.0764055	0.940561	0.980362	-6.99092	0.026613
CDR2	0.0233754	5.3626	0.0765568	0.940444	0.980362	-6.90028	0.0266672
TMEM200B	0.0328766	0.217288	0.0763584	0.940598	0.980362	-5.81044	0.0265961
SYCP2L	0.035257	-1.77496	0.0767712	0.940277	0.980362	-6.20388	0.0267441
JMJD8	0.0356076	5.15364	0.0755466	0.941228	0.980362	-6.85016	0.0263052
SLIT2	0.0509032	2.9597	0.0758451	0.940996	0.980362	-6.20901	0.0264122
AC051649.6	0.0732371	-3.35312	0.07678	0.94027	0.980362	-5.59684	0.0267473
GOLGA8O	0.0798283	-1.65822	0.0764634	0.940516	0.980362	-5.77053	0.0266338
RP11-160H22.5	0.126618	-2.8034	0.0755682	0.941211	0.980362	-5.6644	0.026313
RP11-286H14.6	-0.0647567	-3.57375	-0.0772461	0.939909	0.980346	-5.67207	0.0269144
PTPN11	-0.0147553	8.98619	-0.0772882	0.939876	0.980346	-7.06323	0.0269295
RP11-145M9.5	-0.171722	-3.80381	-0.077567	0.939659	0.9802	-5.54565	0.0270295
SNAP91	0.035617	3.76734	0.0776363	0.939606	0.9802	-6.92873	0.0270544
SLC43A3	-0.0434716	0.196205	-0.0778741	0.939421	0.980065	-5.97297	0.0271397
MTAP	-0.0270309	6.04606	-0.0779358	0.939373	0.980065	-6.9598	0.0271618
CTD-3064M3.4	0.106739	-3.22296	0.0780229	0.939306	0.980058	-5.63454	0.0271931
TMEM88	-0.0346541	-0.487962	-0.0783488	0.939053	0.97985	-6.20882	0.0273101
RP11-401O9.4	-0.0543164	-3.24591	-0.0787058	0.938776	0.979822	-5.54455	0.0274382
ASTE1	-0.0122113	3.63844	-0.078626	0.938837	0.979822	-6.56173	0.0274096
NKAIN1	-0.0120826	2.04432	-0.0787605	0.938733	0.979822	-6.59812	0.0274578
RPL6	-0.0113594	10.8867	-0.0788914	0.938631	0.979822	-7.16169	0.0275049
ZNF131	0.00733893	5.80064	0.0787302	0.938757	0.979822	-6.92514	0.027447
ABT1	0.0117674	5.60855	0.078454	0.938971	0.979822	-6.90836	0.0273478
MC4R	0.052692	-0.776114	0.078457	0.938969	0.979822	-5.99618	0.0273489
ZBTB40-IT1	0.0633468	-3.0475	0.078549	0.938897	0.979822	-5.65801	0.0273819
CROT	-0.0279215	3.82131	-0.0791779	0.938409	0.979689	-6.59983	0.0276078
RP11-114G22.1	0.0721634	-3.05351	0.0793386	0.938284	0.979615	-5.8574	0.0276655
AC092168.2	-0.0543164	-3.66351	-0.0794224	0.938219	0.979604	-5.5445	0.0276956
SVIL	-0.0220391	6.47986	-0.079571	0.938104	0.979557	-6.95726	0.027749
PCF11	0.0227208	6.04721	0.0795505	0.93812	0.979557	-6.96308	0.0277416
RP11-400K9.4	0.126429	-3.98686	0.0797605	0.937957	0.9795	-5.61401	0.0278171
ZNF514	0.0180547	3.20892	0.079916	0.937836	0.979486	-6.36417	0.0278729
SIRT3	0.0243301	3.01849	0.0798484	0.937889	0.979486	-6.28552	0.0278486
CLUH	0.013707	6.10529	0.0800687	0.937718	0.979421	-6.94477	0.0279278
PRKG1	-0.0982064	1.63039	-0.0803123	0.937529	0.979306	-5.97451	0.0280154
HSPA6	0.0413336	-1.80697	0.0802808	0.937553	0.979306	-5.68236	0.0280041
FAM186B	0.0720138	-1.31826	0.0803637	0.937489	0.979306	-5.86387	0.0280339
RP11-762I7.5	0.04718	-1.4747	0.0805697	0.937329	0.979293	-5.80315	0.0281079
WBP2NL	0.0547734	-0.919937	0.0805059	0.937379	0.979293	-5.99283	0.028085
TRHDE-AS1	-0.0543164	-4.18231	-0.0806503	0.937267	0.97929	-5.54441	0.0281369
EMR1	-0.0543164	-3.76682	-0.0807905	0.937158	0.979233	-5.5444	0.0281873
MRPL21	-0.0282524	6.29248	-0.0810507	0.936956	0.979207	-6.95772	0.0282809
TMCO6	-0.0137298	3.68235	-0.0810234	0.936977	0.979207	-6.5754	0.0282711
TMEM242	0.0123152	3.85599	0.080892	0.937079	0.979207	-6.76978	0.0282238
RP9	0.0145247	4.4989	0.0809321	0.937048	0.979207	-6.71899	0.0282383
ZDBF2	0.0206603	5.85416	0.0812671	0.936788	0.97913	-6.95864	0.0283587
PSMA1	0.0273919	7.37418	0.0814694	0.936631	0.97913	-6.9748	0.0284315
AHCYL2	0.0541132	2.97714	0.0812753	0.936782	0.97913	-6.37151	0.0283617
TRIM38	0.0611075	2.31264	0.0813595	0.936716	0.97913	-6.00474	0.028392
SYTL1	-0.118578	-1.92898	-0.0816311	0.936505	0.979062	-5.71146	0.0284897
ENTPD5	-0.0291318	3.92707	-0.0816331	0.936504	0.979062	-6.59556	0.0284904
NUP153	-0.0164869	7.32392	-0.0818044	0.936371	0.979034	-6.98451	0.0285521
NBPF20	-0.0100852	5.39692	-0.081987	0.936229	0.979004	-6.77961	0.0286177
SIK3	0.0105233	4.21686	0.0820558	0.936176	0.979004	-6.83239	0.0286426
PET112	0.0116589	5.70833	0.0819417	0.936264	0.979004	-6.85999	0.0286015
YAP1	0.0884556	2.21161	0.0819122	0.936287	0.979004	-5.8244	0.0285908
STRN3	0.0135362	6.25161	0.0822316	0.93604	0.978972	-6.9498	0.0287058
HSPB8	-0.143097	1.13578	-0.0839202	0.934729	0.978875	-6.07187	0.0293141
RP5-1021I20.1	-0.117231	-0.934417	-0.0825898	0.935762	0.978875	-5.84238	0.0288348
TMEM54	-0.0539285	-0.392907	-0.083261	0.935241	0.978875	-5.64584	0.0290765
SFXN5	-0.0468342	3.49132	-0.0836444	0.934943	0.978875	-6.44671	0.0292147
RP11-297C4.1	-0.0466992	-3.5576	-0.0829478	0.935484	0.978875	-5.57397	0.0289637
RP11-362K14.6	-0.0412047	-1.70182	-0.0838202	0.934807	0.978875	-5.80232	0.029278
PPM1J	-0.0380812	-1.48952	-0.0827108	0.935668	0.978875	-5.67047	0.0288784
KIAA1324L	-0.0262274	3.04516	-0.0830481	0.935406	0.978875	-6.3328	0.0289999
ZSWIM3	-0.0232659	2.90018	-0.0829876	0.935453	0.978875	-6.52608	0.0289781
MRPL17	-0.023106	5.90224	-0.0837676	0.934848	0.978875	-6.86498	0.0292591
ARHGAP10	-0.0168301	5.02231	-0.0836876	0.93491	0.978875	-6.7908	0.0292302
PEX19	-0.0157611	5.47433	-0.0826065	0.935749	0.978875	-6.82464	0.0288408
AP4M1	-0.0129459	4.00984	-0.0833011	0.93521	0.978875	-6.63524	0.029091
ZFR	-0.0109551	7.89527	-0.0824299	0.935886	0.978875	-7.03496	0.0287772
SMIM7	-0.00959617	5.08707	-0.0835622	0.935007	0.978875	-6.85921	0.0291851
FAM216A	0.0160527	5.44787	0.0835173	0.935042	0.978875	-6.93621	0.0291689
PHC3	0.0268116	5.22116	0.0838838	0.934758	0.978875	-6.8237	0.029301
HEATR3	0.0290465	5.45463	0.0824212	0.935892	0.978875	-6.90834	0.0287741
MIR24-2	0.0418974	1.20781	0.0824236	0.935891	0.978875	-6.09803	0.0287749
GARNL3	0.0446322	2.59	0.0831715	0.93531	0.978875	-6.57816	0.0290443
MKLN1-AS2	0.0500907	1.031	0.0825185	0.935817	0.978875	-6.07642	0.0288091
GLB1L2	0.0557252	3.19004	0.083342	0.935178	0.978875	-6.74992	0.0291057
CECR1	0.057773	-1.30158	0.0825613	0.935784	0.978875	-5.63299	0.0288245
MIR3180-1	0.0681358	-2.81663	0.0837335	0.934874	0.978875	-5.68685	0.0292468
RP11-430C7.5	0.0986569	-4.08011	0.0827431	0.935643	0.978875	-5.56644	0.02889
ZNF155	0.011004	3.89317	0.0842095	0.934505	0.978842	-6.55759	0.0294184
AC084018.1	-0.0447015	2.1114	-0.084337	0.934406	0.978796	-6.2511	0.0294643
SCAF8	-0.0152811	5.78592	-0.0845498	0.934241	0.978736	-6.94073	0.0295411
ELP6	-0.0106007	4.52076	-0.0844803	0.934295	0.978736	-6.78988	0.029516
RP5-1126H10.2	0.0458911	-1.13728	0.0846813	0.934139	0.978736	-5.81156	0.0295885
GLIPR1L2	0.16665	-2.41729	0.0845849	0.934214	0.978736	-5.64816	0.0295537
C21orf49	0.075411	0.272714	0.0847662	0.934073	0.978731	-6.15232	0.0296191
LINC00492	-0.0341479	-3.71563	-0.0849383	0.93394	0.978648	-5.81231	0.0296812
RP11-649A18.4	-0.0364102	-0.870913	-0.0851979	0.933738	0.978576	-5.87096	0.0297748
DCTN1	-0.0155955	6.74401	-0.085128	0.933793	0.978576	-6.95574	0.0297496
OTUD7B	0.00969593	6.06093	0.0855479	0.933467	0.978576	-6.90067	0.0299011
C11orf48	0.0221594	4.46542	0.0854748	0.933523	0.978576	-6.67407	0.0298748
TMEM147	0.0223068	6.28674	0.0850966	0.933817	0.978576	-6.93321	0.0297383
RP11-245J9.5	0.0284936	-1.47078	0.0852194	0.933722	0.978576	-5.8806	0.0297826
SLC44A5	0.0465432	1.01594	0.085316	0.933647	0.978576	-5.98392	0.0298174
ATG9B	0.04841	0.383567	0.0852439	0.933703	0.978576	-6.17658	0.0297914
ANKRD31	0.117537	-0.0155725	0.0853421	0.933626	0.978576	-6.01924	0.0298269
HOXC8	0.0551478	1.58354	0.085729	0.933326	0.978574	-6.60112	0.0299665
DGAT2	0.119246	-0.273202	0.0859568	0.93315	0.978446	-6.20082	0.0300487
RP13-401N8.1	-0.119374	-2.83958	-0.0863729	0.932827	0.978231	-5.61419	0.0301989
RP1-79C4.4	-0.0543164	-4.42356	-0.0864189	0.932791	0.978231	-5.54396	0.0302155
NT5C	-0.0122733	5.226	-0.0862905	0.932891	0.978231	-6.80794	0.0301692
RPS19	0.0166204	10.1271	0.0862947	0.932888	0.978231	-7.12825	0.0301707
AC067968.3	0.068497	-3.72978	0.0865262	0.932708	0.978231	-5.61219	0.0302543
PRSS36	-0.0499495	-0.912642	-0.0870512	0.932301	0.977912	-5.87343	0.0304439
ZNF330	-0.034596	6.37197	-0.0870325	0.932315	0.977912	-6.9439	0.0304372
CTC-510F12.4	0.069245	-2.84913	0.0870867	0.932273	0.977912	-5.64503	0.0304567
LA16c-444G7.2	-0.139747	-3.19639	-0.0872991	0.932109	0.977894	-5.6983	0.0305335
MCM9	-0.020907	2.805	-0.0872636	0.932136	0.977894	-6.43887	0.0305207
ZNRF1	-0.0140708	4.61634	-0.0873896	0.932038	0.977894	-6.79452	0.0305662
RP11-936I5.1	0.0590908	-1.11262	0.0873185	0.932094	0.977894	-5.88623	0.0305405
CP	-0.195755	0.184446	-0.0878802	0.931658	0.977797	-5.61816	0.0307435
TES	-0.122156	0.143322	-0.0881931	0.931415	0.977797	-5.54511	0.0308566
CERKL	-0.0820742	-3.15176	-0.0887926	0.93095	0.977797	-5.54377	0.0310734
HOXD4	-0.0709639	-3.059	-0.0882744	0.931352	0.977797	-5.5718	0.030886
B4GALNT3	-0.0646843	0.194104	-0.0892784	0.930574	0.977797	-5.98355	0.0312492
ETNPPL	-0.0543164	-2.72831	-0.0897815	0.930184	0.977797	-5.54368	0.0314313
RP11-488I20.8	-0.0543164	-3.43032	-0.0880495	0.931527	0.977797	-5.54383	0.0308047
TIGD4	-0.0500829	1.79141	-0.0893246	0.930538	0.977797	-6.30084	0.0312659
TENM2	-0.0376612	-1.62355	-0.0888837	0.93088	0.977797	-5.88127	0.0311064
SLC38A10	-0.034815	5.70604	-0.0881186	0.931473	0.977797	-6.81322	0.0308297
METTL14	-0.0311158	5.82915	-0.0887035	0.93102	0.977797	-6.88029	0.0310412
ABI2	-0.0284343	6.98261	-0.0886779	0.931039	0.977797	-6.98614	0.031032
GPR89B	-0.0245878	3.82841	-0.0882576	0.931365	0.977797	-6.66398	0.0308799
PCYT1A	-0.0154109	5.86658	-0.0893636	0.930508	0.977797	-6.92777	0.03128
CDC123	-0.0149233	7.13465	-0.0879599	0.931596	0.977797	-6.97742	0.0307723
DNAH14	-0.0128033	5.02589	-0.0877943	0.931725	0.977797	-6.74314	0.0307124
YIF1A	-0.0121459	6.38984	-0.0882761	0.931351	0.977797	-6.9766	0.0308866
MRPL16	-0.00939357	5.02751	-0.0876903	0.931805	0.977797	-6.7822	0.0306749
CCT7	0.0114595	8.72091	0.0876634	0.931826	0.977797	-7.05496	0.0306651
CSNK2A3	0.015456	4.57017	0.0888777	0.930884	0.977797	-6.67097	0.0311042
RPS28	0.0184231	7.01964	0.0895202	0.930386	0.977797	-7.01396	0.0313367
INTS9	0.0208832	4.84192	0.0885612	0.93113	0.977797	-6.80419	0.0309897
PLEC	0.0212109	7.42674	0.0879431	0.931609	0.977797	-6.94625	0.0307662
RCOR3	0.0224549	5.06322	0.0892637	0.930585	0.977797	-6.81466	0.0312439
RP11-216P16.2	0.0258481	0.760261	0.0891552	0.930669	0.977797	-6.06304	0.0312046
CXorf38	0.0292028	3.91645	0.0886244	0.931081	0.977797	-6.58247	0.0310126
ASRGL1	0.0306084	3.34643	0.0891936	0.93064	0.977797	-6.65813	0.0312185
RP11-408B11.2	0.0322923	-0.517983	0.0884459	0.931219	0.977797	-5.87347	0.030948
ANXA2	0.0498223	8.85872	0.0877405	0.931766	0.977797	-7.04794	0.030693
ADORA2B	0.0537245	2.54472	0.0891825	0.930648	0.977797	-6.18009	0.0312145
DNAH1	0.0676442	0.446089	0.0893846	0.930491	0.977797	-5.95441	0.0312876
MIR3180-3	0.0812551	-3.43901	0.0889802	0.930805	0.977797	-5.6123	0.0311413
SEC24B-AS1	0.11293	-0.456252	0.0892113	0.930626	0.977797	-5.80557	0.0312249
RP11-513O17.2	-0.0543164	-3.2014	-0.0904405	0.929673	0.977422	-5.54363	0.0316699
LIPA	-0.0212018	6.86397	-0.0906599	0.929503	0.977422	-6.96651	0.0317494
NUDT21	-0.0197584	8.2715	-0.0906236	0.929531	0.977422	-7.04272	0.0317362
TTC21B	-0.0105217	5.30822	-0.0907046	0.929468	0.977422	-6.85302	0.0317655
RPL24	-0.010362	9.26677	-0.0904297	0.929681	0.977422	-7.10303	0.031666
ABCB6	0.0240168	1.01721	0.0905056	0.929622	0.977422	-6.14717	0.0316935
CUL1	0.0123432	7.03063	0.0909364	0.929288	0.977351	-6.97589	0.0318495
RP11-434D11.4	0.0583724	-2.98913	0.0909478	0.92928	0.977351	-5.70393	0.0318536
RP11-316E14.6	-0.0774206	-3.70189	-0.0918209	0.928603	0.977117	-5.68162	0.0321701
MRC1L1	-0.0730425	-2.42044	-0.0913637	0.928957	0.977117	-5.7722	0.0320044
BCAS3	-0.0478526	4.15253	-0.091735	0.928669	0.977117	-6.66233	0.032139
MORF4L2	-0.0244502	8.67966	-0.0915343	0.928825	0.977117	-7.06994	0.0320662
MLST8	0.00874813	5.2785	0.0914327	0.928904	0.977117	-6.9005	0.0320294
FHAD1	0.0462143	2.49776	0.0915738	0.928794	0.977117	-6.55857	0.0320805
DLL1	0.0619977	-2.06338	0.0914201	0.928913	0.977117	-5.79421	0.0320248
ARNTL2	0.0842069	2.78093	0.0914246	0.92891	0.977117	-6.02126	0.0320264
THBS1	0.240403	3.07436	0.0916583	0.928729	0.977117	-5.76938	0.0321112
RP11-1103G16.1	-0.0543164	-3.28643	-0.0921994	0.928309	0.976957	-5.54348	0.0323073
UBE2N	0.0145348	7.58053	0.0922817	0.928245	0.976957	-7.00577	0.0323372
RBKS	0.0354954	0.283384	0.0921883	0.928318	0.976957	-6.06644	0.0323033
RP11-884K10.7	-0.024048	1.29936	-0.0924212	0.928137	0.976938	-6.11865	0.0323878
AHCYL1	0.0197709	7.29787	0.0926867	0.927931	0.976779	-6.99355	0.0324841
ANAPC1	-0.01365	6.97323	-0.0929326	0.927741	0.976643	-6.95733	0.0325733
FOXP1-IT1	0.0956685	-3.79983	0.0929232	0.927748	0.976643	-5.61726	0.0325699
PARP10	-0.0933305	0.814342	-0.0933637	0.927407	0.976397	-5.93399	0.0327297
AC005540.3	0.0417912	-0.898338	0.0934971	0.927303	0.976345	-5.92337	0.0327782
GAL3ST1	0.118829	-2.97943	0.0935807	0.927239	0.976334	-5.58126	0.0328085
RP11-305B6.3	-0.0543164	-3.78889	-0.0936649	0.927173	0.976322	-5.54335	0.0328391
SOGA3	-0.0321269	5.26112	-0.0936976	0.927148	0.976322	-6.94616	0.0328509
RP5-1074L1.1	0.0715889	0.0235952	0.0936955	0.92715	0.976322	-6.05182	0.0328502
C1orf204	0.105875	-1.21245	0.0943318	0.926656	0.975949	-5.86316	0.0330813
GS1-57L11.1	-0.0543164	-4.03426	-0.094905	0.926212	0.975921	-5.54324	0.0332895
ASB13	-0.038028	5.46423	-0.0945719	0.92647	0.975921	-6.84766	0.0331685
MFSD5	-0.0289238	4.01877	-0.0946278	0.926427	0.975921	-6.64026	0.0331888
PFN2	-0.0257849	7.87124	-0.0944354	0.926576	0.975921	-7.00695	0.0331189
TPP2	-0.0125142	7.085	-0.0947793	0.92631	0.975921	-6.99111	0.0332438
ATOX1	0.013916	5.11271	0.0949648	0.926166	0.975921	-6.81872	0.0333112
MCOLN1	0.0161009	3.55619	0.0946434	0.926415	0.975921	-6.60198	0.0331944
YIPF2	0.0231718	4.86332	0.0950196	0.926123	0.975921	-6.81241	0.0333311
CDC42EP2	0.0291324	2.84113	0.0944785	0.926543	0.975921	-6.33448	0.0331345
LEMD2	0.0369126	5.51202	0.0944406	0.926572	0.975921	-6.85964	0.0331208
C3orf52	0.121172	-1.6122	0.0946451	0.926414	0.975921	-5.58143	0.033195
RP1-15D23.2	-0.113803	-3.32857	-0.0955513	0.925711	0.975637	-5.65561	0.0335244
RPS6KA4	0.0304188	4.33387	0.0956525	0.925633	0.975636	-6.53303	0.0335611
AKR1C2	0.0443389	0.897034	0.0956228	0.925656	0.975636	-6.19786	0.0335504
AC097662.2	0.0972642	-0.235642	0.0956603	0.925627	0.975636	-5.93207	0.033564
NUDCD2	0.0431973	5.29714	0.0958332	0.925493	0.975635	-6.85059	0.0336269
CDKN2C	-0.0218367	5.51533	-0.0959922	0.92537	0.975562	-6.81463	0.0336847
PDIA6	-0.0360588	9.1828	-0.0962331	0.925183	0.975495	-7.08462	0.0337723
EGFL7	-0.0357374	-0.128438	-0.0962258	0.925189	0.975495	-6.67142	0.0337696
ZNF689	0.0409597	4.63411	0.0962032	0.925206	0.975495	-6.78949	0.0337614
AC012531.25	0.0436497	-1.50466	0.0961443	0.925252	0.975495	-5.8604	0.03374
RNF112	-0.05463	2.04775	-0.0966304	0.924875	0.975331	-6.38181	0.0339168
AC004067.5	-0.0543164	-4.34299	-0.0966242	0.92488	0.975331	-5.54309	0.0339146
MYNN	0.0130435	5.50755	0.0966515	0.924859	0.975331	-6.89174	0.0339245
FAM83E	0.049495	-1.7139	0.0967498	0.924783	0.975331	-5.77456	0.0339602
IQSEC3	-0.0432966	-2.44932	-0.0969419	0.924634	0.9753	-6.11218	0.0340302
PCDHA11	0.0193661	0.464188	0.0971129	0.924501	0.975217	-6.52656	0.0340924
ABCE1	-0.0244238	8.78877	-0.0972559	0.924391	0.975215	-7.06399	0.0341444
ALG3	-0.0150878	5.48149	-0.0972252	0.924414	0.975215	-6.9066	0.0341333
DECR1	0.0271163	5.84494	0.0971853	0.924445	0.975215	-6.95188	0.0341187
WFS1	-0.0162779	4.32917	-0.097532	0.924177	0.975102	-6.80409	0.0342449
MANSC1	0.0651777	3.77348	0.0975848	0.924136	0.975102	-6.62941	0.0342641
MEGF10	0.129925	-2.6309	0.0976236	0.924106	0.975102	-5.543	0.0342783
CMSS1	0.0210042	6.31183	0.0978051	0.923965	0.97505	-6.96148	0.0343444
RP3-412A9.16	-0.0498705	-1.59101	-0.0982015	0.923658	0.975029	-5.87922	0.0344887
CCT2	-0.0263833	8.84165	-0.0979012	0.923891	0.975029	-7.07383	0.0343794
BAG6	-0.0202357	7.31108	-0.0980079	0.923808	0.975029	-6.98462	0.0344182
GSPT2	-0.0131766	4.54519	-0.097969	0.923838	0.975029	-6.76383	0.0344041
SMCO4	0.0194761	2.69627	0.0980024	0.923812	0.975029	-6.70382	0.0344162
CTC-260F20.3	0.0637532	-3.36434	0.098298	0.923583	0.975029	-5.57458	0.0345239
TMEM261	0.0659606	5.30274	0.0982074	0.923654	0.975029	-6.9211	0.0344909
NMRK1	0.110898	1.49912	0.0980125	0.923805	0.975029	-6.0451	0.0344199
RP5-1092A3.4	-0.0986669	-0.563777	-0.0985713	0.923372	0.974941	-5.86448	0.0346235
LDLRAD4	-0.0834245	2.82654	-0.0985669	0.923375	0.974941	-6.39438	0.0346218
CTD-2105E13.13	-0.0310124	-1.23048	-0.0986957	0.923275	0.974941	-5.85907	0.0346688
PCDHB13	0.060979	0.0540614	0.0987536	0.92323	0.974941	-6.02107	0.0346899
CLEC18B	-0.145027	-3.58265	-0.0989136	0.923107	0.974902	-5.61725	0.0347482
AC104695.3	-0.0997963	-3.72087	-0.0989603	0.92307	0.974902	-5.55952	0.0347652
NPIPA7	-0.0337181	1.42536	-0.0988933	0.923122	0.974902	-6.17618	0.0347408
PVRL3	-0.0631037	4.69822	-0.0992055	0.92288	0.974866	-6.60066	0.0348546
FSCN1	-0.0349617	8.86371	-0.099147	0.922926	0.974866	-7.06129	0.0348332
IFI44L	-0.0543164	-2.7311	-0.0993321	0.922782	0.974829	-5.54284	0.0349007
STAR	-0.0250233	-0.208937	-0.0994227	0.922712	0.974812	-6.38512	0.0349337
PCNXL4	0.00983708	6.34253	0.0995343	0.922626	0.974812	-6.94229	0.0349744
TAF15	0.0104836	4.7955	0.0995509	0.922613	0.974812	-6.83661	0.0349805
FAM115A	0.0209854	7.20245	0.0994646	0.92268	0.974812	-7.00644	0.034949
RP1-59D14.5	0.108245	-3.25602	0.0995706	0.922598	0.974812	-5.56583	0.0349877
FAR2	-0.0296346	6.2075	-0.099881	0.922357	0.974722	-6.97254	0.0351009
ESYT3	-0.0955458	-0.401346	-0.100055	0.922222	0.974636	-5.83048	0.0351645
MYBBP1A	-0.0259686	5.93219	-0.100364	0.921983	0.974441	-6.91477	0.0352772
P4HTM	-0.0219841	4.18705	-0.100382	0.921969	0.974441	-6.78188	0.0352835
SP2	0.0251632	1.51645	0.100573	0.921821	0.974441	-6.18518	0.0353532
PCGF5	0.036839	4.85061	0.100424	0.921937	0.974441	-6.70527	0.0352988
MAP7D3	0.0119794	5.09294	0.100688	0.921732	0.974415	-6.8372	0.0353954
TOX	0.0400021	5.0634	0.100675	0.921742	0.974415	-6.87885	0.0353905
RP11-48B3.4	-0.0643675	-1.74152	-0.100953	0.921527	0.974301	-5.80802	0.0354921
LINC00355	-0.0543164	-3.34281	-0.101493	0.921109	0.974206	-5.54264	0.0356891
PPTC7	-0.03052	4.93203	-0.10114	0.921382	0.974206	-6.84527	0.03556
LCLAT1	-0.0287602	6.54058	-0.101276	0.921277	0.974206	-6.97168	0.0356097
CTD-3074O7.12	-0.0246709	1.46413	-0.101318	0.921244	0.974206	-6.17368	0.0356251
KAT6A	-0.0204191	6.31638	-0.101215	0.921324	0.974206	-6.94641	0.0355875
ZNF70	-0.0157605	3.3279	-0.101323	0.921241	0.974206	-6.58287	0.0356268
UBXN6	0.0106415	5.94841	0.101267	0.921283	0.974206	-6.91157	0.0356067
PRKD2	0.0234769	4.11285	0.101479	0.921119	0.974206	-6.62206	0.0356841
MRPL36	0.0311543	5.06315	0.1017	0.920948	0.974206	-6.83528	0.0357648
GFRA3	0.0629891	-1.98523	0.10114	0.921382	0.974206	-6.06585	0.0355604
LHB	0.0752253	-3.63732	0.101765	0.920899	0.974206	-5.59512	0.0357882
SMARCB1	0.0241672	5.84105	0.102135	0.920612	0.974042	-6.93644	0.0359234
RBMS3-AS2	0.0909092	-1.86588	0.102106	0.920634	0.974042	-5.80392	0.035913
SPATS2	0.0293615	6.10323	0.102287	0.920494	0.974009	-6.9209	0.0359791
EFR3B	0.082886	2.83455	0.102302	0.920482	0.974009	-6.39781	0.0359846
LRRTM1	-0.038732	1.65657	-0.102612	0.920242	0.973856	-6.61378	0.0360979
BRIX1	-0.0201622	6.74022	-0.102756	0.920131	0.973795	-6.9643	0.0361505
CTD-2293H3.1	-0.1058	-3.53832	-0.102827	0.920076	0.973794	-5.57588	0.0361765
CNTN3	-0.0885338	-2.48424	-0.102906	0.920015	0.973787	-5.57079	0.0362052
PNMA6D	-0.075703	-3.3727	-0.103212	0.919778	0.973787	-5.81866	0.036317
AC093642.3	-0.0659743	-1.48373	-0.10391	0.919237	0.973787	-5.82267	0.0365724
RP11-84A14.4	-0.0635116	-2.87716	-0.103465	0.919582	0.973787	-5.64046	0.0364096
SLC10A7	-0.0494267	4.05152	-0.103798	0.919324	0.973787	-6.64505	0.0365314
RP11-192H23.8	-0.0477083	-2.36923	-0.103269	0.919734	0.973787	-5.7278	0.0363378
SMG7	-0.0445218	5.64991	-0.103644	0.919443	0.973787	-6.8778	0.036475
PJA2	-0.0391788	7.22016	-0.10344	0.919601	0.973787	-6.9885	0.0364006
AP2S1	-0.0282214	6.261	-0.103416	0.91962	0.973787	-6.92472	0.0363915
POLR3K	-0.0258555	4.69298	-0.10295	0.919981	0.973787	-6.85832	0.0362213
INTS4	-0.0230703	5.2022	-0.103343	0.919677	0.973787	-6.88904	0.0363649
ITGB1BP1	-0.0178467	6.42568	-0.10345	0.919593	0.973787	-6.95862	0.0364041
KLF12	0.0327225	4.6266	0.10301	0.919934	0.973787	-6.76528	0.0362432
TMEM25	0.0357636	3.35746	0.103124	0.919846	0.973787	-6.58208	0.0362849
CNTF	0.0517842	-0.630452	0.103486	0.919566	0.973787	-5.84601	0.0364173
RP11-284M14.1	0.0911387	-1.95299	0.103113	0.919855	0.973787	-5.73923	0.0362807
FAM157A	-0.0406015	-1.44365	-0.104142	0.919058	0.973705	-5.78849	0.0366573
P2RY6	0.0648275	2.61874	0.104122	0.919074	0.973705	-6.70429	0.0366497
C1orf220	-0.0633209	-2.58189	-0.104268	0.918961	0.9737	-5.65439	0.0367031
PITPNA-AS1	-0.0655233	2.65955	-0.104383	0.918871	0.973662	-6.32671	0.0367455
TRAK1	0.0144662	4.45742	0.104595	0.918707	0.973547	-6.82016	0.0368231
CMYA5	0.0868587	-1.63866	0.104593	0.918708	0.973547	-5.70445	0.0368223
KLHL29	0.01316	3.62405	0.104909	0.918464	0.973403	-6.77645	0.0369378
WDR77	0.0224977	5.7079	0.105039	0.918364	0.973353	-6.92969	0.0369854
AC007319.1	-0.0543164	-4.07026	-0.105255	0.918196	0.973267	-5.54227	0.0370647
DEPDC7	-0.0283454	2.68365	-0.105213	0.918229	0.973267	-6.24899	0.0370492
MTMR1	-0.0254207	4.96943	-0.105266	0.918187	0.973267	-6.83717	0.0370687
FAM168A	-0.012884	5.6456	-0.105288	0.918171	0.973267	-6.93786	0.0370765
RP11-299J3.8	-0.0949574	0.661387	-0.105699	0.917852	0.973117	-6.11831	0.0372272
LRP12	-0.0505294	5.05531	-0.105786	0.917785	0.973117	-6.80144	0.0372589
RP11-927P21.1	0.0643577	-1.52345	0.105741	0.91782	0.973117	-5.70924	0.0372426
UNC13C	0.0933271	-1.2175	0.105676	0.917871	0.973117	-5.75686	0.0372185
DYNC1LI1	-0.0271596	5.18926	-0.106032	0.917595	0.973084	-6.88463	0.0373492
STK38L	0.0564835	5.79101	0.105994	0.917624	0.973084	-6.8942	0.0373352
SNAPC1	-0.0246624	4.71339	-0.106232	0.91744	0.973003	-6.75151	0.0374225
TNXB	0.181993	1.15255	0.106325	0.917368	0.972984	-5.74932	0.0374565
PTPRD	-0.0742673	-0.597574	-0.106507	0.917227	0.972897	-5.67723	0.0375232
CCDC93	-0.0488386	5.16075	-0.106652	0.917115	0.972897	-6.68128	0.0375764
MYO19	-0.0202713	5.96596	-0.106594	0.917159	0.972897	-6.93089	0.0375552
HDX	0.018898	4.24731	0.106501	0.917232	0.972897	-6.7245	0.0375209
CBLN3	0.0960176	-1.0283	0.106707	0.917073	0.972897	-5.66142	0.0375963
RP11-1223D19.1	-0.0543164	-4.15277	-0.107268	0.916638	0.972722	-5.54208	0.0378019
AC084117.3	-0.0543164	-3.85034	-0.107254	0.916649	0.972722	-5.54208	0.0377971
HIGD2A	-0.0537481	5.63282	-0.107382	0.91655	0.972722	-6.91053	0.0378437
CCP110	-0.0270828	6.79315	-0.107307	0.916608	0.972722	-6.96947	0.0378163
MRPS22	0.0193836	5.95295	0.107062	0.916797	0.972722	-6.91425	0.0377267
PPA2	0.0234482	6.48003	0.107109	0.916761	0.972722	-6.94029	0.0377437
CHN2	0.0603574	0.732856	0.107144	0.916734	0.972722	-5.96153	0.0377565
ISL2	0.0754233	-2.66329	0.107511	0.91645	0.972722	-5.64265	0.0378912
TASP1	0.0453942	3.94529	0.107677	0.916322	0.972675	-6.64707	0.037952
GLTPD1	0.0173757	3.78029	0.107793	0.916232	0.972637	-6.49408	0.0379947
ADAMTS7	0.039763	5.9008	0.107964	0.916099	0.972554	-6.89989	0.0380574
TRIP6	-0.125906	1.66426	-0.108113	0.915985	0.972489	-5.82563	0.0381119
MTF1	-0.0286672	4.366	-0.108295	0.915844	0.972431	-6.56753	0.0381786
NSRP1	-0.0250134	4.10826	-0.108458	0.915718	0.972431	-6.76548	0.0382384
MAX	-0.013102	5.82351	-0.108332	0.915815	0.972431	-6.91675	0.0381921
BST2	0.143795	1.98284	0.108252	0.915876	0.972431	-6.13962	0.0381631
SNORA76	-0.0507157	4.54468	-0.108679	0.915546	0.972395	-6.7312	0.0383197
GRASP	-0.0322726	2.37506	-0.108774	0.915473	0.972395	-6.39785	0.0383544
DCUN1D3	-0.0308053	4.64065	-0.108575	0.915627	0.972395	-6.76527	0.0382816
AUP1	0.0475471	6.86235	0.108618	0.915593	0.972395	-6.94486	0.0382974
MIPOL1	0.0813819	-0.0826451	0.108785	0.915464	0.972395	-6.10833	0.0383586
RP11-325K4.2	0.0722139	-2.89095	0.109027	0.915277	0.97231	-5.69213	0.0384475
BAIAP2	-0.0155984	3.13389	-0.109238	0.915114	0.972194	-6.67939	0.0385248
RP11-661A12.5	-0.0543164	-3.76477	-0.109358	0.915021	0.972181	-5.54186	0.038569
VCPKMT	0.0431303	3.73171	0.109324	0.915048	0.972181	-6.52712	0.0385563
AC139100.2	-0.060915	-0.458432	-0.109564	0.914862	0.972098	-5.76787	0.0386445
NR1D1	0.0498022	1.40364	0.109672	0.914778	0.972066	-6.18942	0.0386844
FAM53B	-0.0325869	5.50892	-0.109755	0.914714	0.972055	-6.88593	0.0387148
SCRN1	-0.0260652	8.68353	-0.10979	0.914687	0.972055	-7.05007	0.0387277
GMPR2	0.0288192	6.14921	0.109842	0.914646	0.972055	-6.90786	0.0387467
HCCAT3	0.0660507	-4.04919	0.110067	0.914472	0.97197	-5.65463	0.0388294
ZNRD1	-0.0275958	4.53568	-0.110242	0.914337	0.971884	-6.7903	0.0388937
C11orf70	0.0982525	2.26936	0.110309	0.914285	0.971884	-6.4463	0.0389182
RP11-10A14.5	-0.0651444	-1.42496	-0.11074	0.913952	0.971766	-5.90253	0.0390768
AC005785.2	-0.0585373	-2.3592	-0.11059	0.914068	0.971766	-5.68984	0.0390215
LIAS	-0.0496736	4.41797	-0.110525	0.914118	0.971766	-6.77505	0.0389975
ALKBH3	-0.0332913	4.25057	-0.110567	0.914086	0.971766	-6.61891	0.039013
AGBL5	-0.0233802	5.62409	-0.11097	0.913774	0.971766	-6.86773	0.0391611
SDHA	-0.021034	7.17861	-0.110917	0.913815	0.971766	-7.01219	0.0391416
TLR9	0.0850249	-4.04401	0.110653	0.914019	0.971766	-5.54498	0.0390446
RP11-283G6.4	0.0993428	-3.60973	0.110731	0.913959	0.971766	-5.57928	0.0390735
GOLGA8M	0.104526	-3.59836	0.110637	0.914032	0.971766	-5.54521	0.0390387
TM4SF19-AS1	-0.118688	-3.0067	-0.111316	0.913506	0.971635	-5.63776	0.0392885
RP11-521M14.1	-0.0543164	-3.85783	-0.111421	0.913425	0.971635	-5.54165	0.0393272
ZNF74	-0.024663	5.64229	-0.111537	0.913336	0.971635	-6.90511	0.0393697
PBX3	-0.015935	5.64934	-0.111435	0.913415	0.971635	-6.90878	0.0393321
CLCN6	0.020742	3.55199	0.111311	0.91351	0.971635	-6.428	0.0392866
NOP16	0.0220965	6.33496	0.111551	0.913325	0.971635	-6.95094	0.0393748
C17orf82	0.0652377	-0.494975	0.111467	0.91339	0.971635	-5.89958	0.0393438
TGOLN2	0.0958874	4.83472	0.111841	0.9131	0.9716	-6.7033	0.0394817
CTC-338M12.2	0.0555024	-0.689577	0.111967	0.913002	0.971553	-6.01169	0.0395281
CRYBB3	0.15187	-3.22175	0.111989	0.912986	0.971553	-5.5422	0.0395361
TMEM55B	-0.0156722	4.85062	-0.112163	0.912851	0.971512	-6.80999	0.0395999
VAV2	0.0251939	5.79666	0.112157	0.912856	0.971512	-6.91997	0.0395977
TMEM133	-0.0549327	2.39471	-0.112507	0.912585	0.971497	-6.32591	0.0397264
TGIF2LY	-0.0543164	-3.65924	-0.112704	0.912433	0.971497	-5.54152	0.0397992
MAGEA1	-0.0543164	-2.37196	-0.112344	0.912711	0.971497	-5.54156	0.0396666
ODC1	-0.0522453	8.36527	-0.112668	0.91246	0.971497	-7.07936	0.039786
MARCH9	-0.0378992	4.0173	-0.11264	0.912482	0.971497	-6.59498	0.0397757
PRCC	0.0307134	5.8603	0.112493	0.912596	0.971497	-6.90794	0.0397214
NEFL	0.0748039	7.11539	0.112314	0.912734	0.971497	-7.0669	0.0396557
ADPRHL1	0.0768283	-0.211282	0.112384	0.912681	0.971497	-5.92748	0.0396812
TTC13	-0.0177469	5.57287	-0.112891	0.912288	0.971481	-6.87305	0.0398679
SPIN1	-0.0106317	6.62471	-0.113069	0.912151	0.971392	-6.94455	0.0399334
MSTO1	0.0281443	4.97222	0.113338	0.911943	0.971227	-6.8035	0.0400325
KAT2B	0.0493263	2.09803	0.113395	0.911898	0.971227	-6.33225	0.0400535
CTB-50L17.9	0.0681567	-2.32399	0.113523	0.911799	0.97119	-5.69561	0.0401007
RP11-161D15.1	-0.0711657	-1.63268	-0.113619	0.911725	0.971176	-5.79809	0.0401361
RP11-401O9.3	-0.0543164	-3.33495	-0.113741	0.911631	0.971176	-5.54141	0.040181
SRPX	-0.0371509	2.49346	-0.113609	0.911733	0.971176	-5.81713	0.0401323
RP11-497E19.1	-0.0543164	-3.56411	-0.113855	0.911543	0.971155	-5.5414	0.0402231
ARHGEF10	-0.0282827	5.15541	-0.113844	0.911551	0.971155	-6.8701	0.040219
FAM13A-AS1	-0.0627551	-2.5313	-0.114155	0.911311	0.971013	-5.69862	0.0403335
TXNRD3	0.0512781	3.63647	0.114389	0.911129	0.970877	-6.64687	0.0404199
MAP3K6	0.0881389	1.92564	0.114411	0.911113	0.970877	-6.05131	0.0404277
RP11-989F5.3	-0.0588087	-2.73396	-0.114728	0.910868	0.970713	-5.63945	0.0405446
SAP30	0.0140818	5.60509	0.114786	0.910823	0.970713	-6.91855	0.0405662
SRPX2	-0.0543164	-3.91212	-0.114902	0.910733	0.970684	-5.54129	0.0406089
TSPAN33	0.0853189	1.93257	0.115073	0.910601	0.970601	-6.35863	0.0406718
RP11-328M4.2	-0.153594	-1.11236	-0.115533	0.910246	0.970569	-5.83585	0.0408414
CMIP	-0.0567977	3.52819	-0.115865	0.909989	0.970569	-6.64811	0.040964
CTD-2384A14.1	-0.0543164	-4.38327	-0.115427	0.910327	0.970569	-5.54123	0.0408024
GLI3	-0.0543164	-1.52697	-0.115181	0.910517	0.970569	-5.54125	0.0407119
RP11-585F1.10	-0.0539826	-1.78777	-0.115539	0.910241	0.970569	-5.80328	0.0408437
MIR146A	-0.0529375	-2.2849	-0.115229	0.910481	0.970569	-5.54298	0.0407293
H3F3C	-0.0446616	0.563611	-0.115482	0.910284	0.970569	-5.99137	0.0408229
ANO7	-0.0396904	0.270041	-0.115802	0.910038	0.970569	-5.98304	0.0409407
COG5	-0.0122551	5.78922	-0.115854	0.909997	0.970569	-6.90984	0.04096
RP11-231G3.1	0.0318623	-0.888158	0.115827	0.910018	0.970569	-5.91685	0.0409498
RP4-756H11.3	0.0415368	-1.29891	0.116163	0.909759	0.970569	-5.84387	0.0410739
ASMTL-AS1	0.0516606	-2.28724	0.115504	0.910268	0.970569	-5.75962	0.0408308
ANKRD20A3	0.0517725	-3.77708	0.115475	0.91029	0.970569	-5.62994	0.0408202
DBH-AS1	0.0664426	-0.589147	0.115268	0.91045	0.970569	-5.831	0.040744
RNF130	0.0691736	4.9681	0.115524	0.910252	0.970569	-6.84115	0.0408382
RP11-637A17.2	0.0733485	-1.88761	0.11532	0.91041	0.970569	-5.7437	0.0407631
BZRAP1-AS1	-0.0817367	-0.552635	-0.116383	0.909589	0.970497	-5.91278	0.041155
LAMTOR3	0.0275536	6.01186	0.116413	0.909565	0.970497	-6.91456	0.0411664
SSR1	0.0579174	7.46679	0.116721	0.909327	0.970333	-6.99791	0.0412798
AP001372.2	0.0924638	0.780422	0.11684	0.909235	0.970333	-6.10716	0.0413238
CDNF	0.13384	0.479322	0.116761	0.909296	0.970333	-6.08272	0.0412949
CTD-3065J16.6	-0.0796117	-1.73732	-0.117007	0.909106	0.970269	-6.30818	0.0413855
C10orf137	0.0261472	5.66069	0.117075	0.909053	0.970269	-6.8415	0.0414107
SPTSSA	-0.0173369	6.05451	-0.117182	0.908971	0.970239	-6.94036	0.0414501
COL9A2	-0.102631	0.746968	-0.117396	0.908805	0.97012	-6.1494	0.0415293
MTUS1	-0.0161933	7.1285	-0.11741	0.908795	0.97012	-7.0235	0.0415343
SEPHS2	0.0351147	5.93549	0.117449	0.908765	0.97012	-6.92613	0.0415486
PHACTR4	0.0580039	3.78675	0.117568	0.908672	0.97012	-6.54069	0.0415928
ADAM28	-0.135404	-3.81759	-0.118065	0.908288	0.970106	-5.57197	0.0417764
FLT3LG	-0.0786403	-3.0533	-0.118451	0.90799	0.970106	-5.62829	0.0419189
RP11-443B20.1	-0.0634916	1.1632	-0.118896	0.907646	0.970106	-6.09746	0.0420834
RP11-531A24.5	-0.0582961	-1.16274	-0.117888	0.908425	0.970106	-5.81229	0.0417111
RP11-474O21.5	-0.0543164	-3.72021	-0.117821	0.908477	0.970106	-5.54097	0.0416862
ZNF493	-0.0474113	1.77122	-0.118413	0.908019	0.970106	-6.40088	0.0419049
TBCEL	-0.0470171	4.84512	-0.117801	0.908492	0.970106	-6.87381	0.0416788
ISOC1	-0.0442416	7.26283	-0.118282	0.90812	0.970106	-6.99047	0.0418566
APIP	-0.0383937	5.24442	-0.117936	0.908388	0.970106	-6.8275	0.0417286
C9orf3	-0.0341722	5.77367	-0.117692	0.908577	0.970106	-6.9182	0.0416385
TTC31	-0.0327391	3.55721	-0.118642	0.907842	0.970106	-6.4215	0.0419895
PSENEN	-0.029328	3.38157	-0.118534	0.907926	0.970106	-6.48062	0.0419496
CBX6	-0.0209902	6.61942	-0.118655	0.907832	0.970106	-7.00141	0.0419943
USP6NL	-0.0142587	5.37146	-0.117865	0.908443	0.970106	-6.81697	0.0417024
SRSF4	-0.0126975	5.78277	-0.117805	0.908489	0.970106	-6.85624	0.0416801
NIPBL	0.0124901	6.62872	0.118496	0.907955	0.970106	-6.95765	0.0419356
LTN1	0.0157665	7.44797	0.117828	0.908472	0.970106	-6.98957	0.0416887
RP1-30M3.5	0.052167	-1.77614	0.118468	0.907977	0.970106	-5.78326	0.0419253
AC007879.4	0.0698386	-3.9112	0.117705	0.908567	0.970106	-5.62169	0.0416432
GSDMB	0.0823396	0.26859	0.117817	0.90848	0.970106	-5.91048	0.0416847
ADCY5	0.1105	-1.87665	0.118417	0.908016	0.970106	-6.04869	0.0419065
RP11-402D21.2	0.117282	-3.74744	0.118227	0.908163	0.970106	-5.57427	0.0418361
KCTD16	0.130916	1.01149	0.11786	0.908447	0.970106	-5.96634	0.0417006
RP11-355I22.7	0.0926544	-3.94845	0.119505	0.907176	0.96993	-5.72326	0.0423086
FAXC	-0.0242868	3.53582	-0.120296	0.906564	0.969427	-6.70329	0.0426015
UNC13B	0.0272113	6.34258	0.120237	0.90661	0.969427	-6.97065	0.0425795
STPG1	0.045573	2.34287	0.120215	0.906627	0.969427	-6.2054	0.0425715
H2AFJ	0.0797629	3.93704	0.120184	0.906651	0.969427	-6.73702	0.04256
RP11-152P17.2	0.167974	-1.17181	0.120242	0.906606	0.969427	-5.72527	0.0425815
RP3-388M5.9	-0.0587867	-1.65187	-0.121076	0.905961	0.969007	-5.7863	0.0428903
RFPL3S	0.101885	-0.961412	0.12104	0.905989	0.969007	-5.87276	0.042877
RP11-37B2.1	-0.0789493	0.931116	-0.121214	0.905855	0.968978	-6.03876	0.0429413
ZKSCAN3	0.0374637	3.47844	0.121467	0.90566	0.968857	-6.49965	0.0430349
AQP2	0.103767	-2.7277	0.12143	0.905688	0.968857	-6.03155	0.0430213
NUP210L	0.099838	-3.23084	0.121729	0.905457	0.968724	-5.59472	0.0431322
RP11-456K23.1	-0.119347	-1.24224	-0.121997	0.90525	0.968606	-5.7837	0.0432314
PHB2	0.0129911	9.06275	0.122055	0.905205	0.968606	-7.07334	0.0432531
WAC	0.0217825	7.41584	0.122127	0.90515	0.968606	-6.9815	0.0432795
MARCH6	0.0495752	7.5112	0.12213	0.905147	0.968606	-7.00522	0.0432808
IRS1	0.0870315	3.55947	0.121942	0.905293	0.968606	-6.56985	0.043211
KLC1	0.0382981	4.38835	0.122312	0.905007	0.968588	-6.77255	0.043348
RP11-382A20.2	-0.0394378	-0.258796	-0.122583	0.904798	0.968465	-5.9717	0.0434485
FERMT1	0.114723	-1.22063	0.12253	0.904839	0.968465	-5.7737	0.0434288
PRRT3-AS1	-0.044497	-0.182066	-0.122948	0.904516	0.968275	-6.0618	0.0435838
TUBG1	-0.0389794	5.90867	-0.123028	0.904454	0.968275	-6.93076	0.0436137
TLR6	0.124273	-1.5242	0.122899	0.904554	0.968275	-5.54079	0.0435657
MICALL1	-0.0386389	4.52794	-0.123126	0.904378	0.96826	-6.81437	0.0436499
C16orf87	-0.0258136	4.56967	-0.123232	0.904296	0.96826	-6.70498	0.0436895
FAM66A	0.186065	-2.0666	0.123173	0.904342	0.96826	-5.7422	0.0436674
NPC1L1	-0.0496949	-2.56921	-0.123392	0.904173	0.968212	-5.68363	0.0437486
RP11-426C22.4	-0.0543164	-3.51886	-0.123564	0.90404	0.968127	-5.54032	0.0438124
ZNF837	-0.0998641	0.761902	-0.12367	0.903958	0.968097	-6.09402	0.0438517
ALKBH1	0.0160251	4.52196	0.123804	0.903854	0.968043	-6.726	0.0439016
RP11-509E16.1	-0.105564	1.92369	-0.123985	0.903715	0.967991	-6.22439	0.0439687
ZBTB4	0.0370564	3.50303	0.123954	0.903739	0.967991	-6.5221	0.0439572
FSD1L	0.0398878	3.71746	0.123937	0.903752	0.967991	-6.53286	0.0439507
RP11-219B4.7	0.216751	-2.90736	0.123999	0.903704	0.967991	-5.61734	0.0439739
AC013460.1	-0.115832	-3.68408	-0.124318	0.903457	0.967987	-5.66602	0.0440923
RP11-148O21.4	-0.0981368	-3.1895	-0.1246	0.90324	0.967987	-5.68125	0.0441968
CBR3	-0.0767658	-0.574247	-0.124572	0.903261	0.967987	-5.7191	0.0441866
APBB3	-0.0363563	2.99248	-0.124222	0.903532	0.967987	-6.51665	0.0440564
KIAA0020	-0.0292273	6.23756	-0.124441	0.903363	0.967987	-6.96007	0.0441379
GART	-0.02835	7.92313	-0.124458	0.90335	0.967987	-7.00779	0.0441441
ENOSF1	-0.0153976	3.79331	-0.12422	0.903533	0.967987	-6.58858	0.0440558
GTPBP1	0.014717	5.23901	0.124292	0.903477	0.967987	-6.92307	0.0440827
FASTK	0.02637	5.25825	0.124752	0.903123	0.967987	-6.85712	0.0442533
TPM3	-0.0541931	8.76025	-0.125145	0.902819	0.967874	-7.03345	0.0443993
TSEN54	-0.026984	4.7079	-0.124992	0.902937	0.967874	-6.69347	0.0443427
PIAS2	0.0359209	4.98301	0.125046	0.902895	0.967874	-6.73849	0.0443626
DCAF4	0.05131	4.25811	0.124983	0.902944	0.967874	-6.79909	0.044339
C14orf28	0.0673973	1.41792	0.125253	0.902736	0.967874	-6.11324	0.0444394
RP11-510C10.3	-0.0543164	-2.66658	-0.125473	0.902566	0.967755	-5.5401	0.0445213
HCG16	-0.0820742	-3.62777	-0.125758	0.902346	0.967587	-5.54007	0.044627
SCNM1	-0.0525663	5.03824	-0.125765	0.90234	0.967587	-6.76552	0.0446298
PPP2R2D	-0.011797	5.34298	-0.125916	0.902224	0.967587	-6.86995	0.0446857
TTC1	0.0298506	6.36682	0.125746	0.902355	0.967587	-6.9326	0.0446226
RP11-397O8.7	0.0687282	-1.50012	0.126019	0.902144	0.967587	-5.8517	0.0447241
IL1B	0.341924	-1.25558	0.126149	0.902044	0.967541	-5.54002	0.0447723
CCDC71	-0.0155518	3.80824	-0.126273	0.901948	0.967525	-6.64316	0.0448186
TXNIP	0.0470149	7.02984	0.126238	0.901975	0.967525	-6.9729	0.0448053
CTAG1B	-0.0543164	-2.19152	-0.126385	0.901862	0.967518	-5.53999	0.04486
RP11-21L23.3	-0.0658564	-2.87216	-0.126535	0.901746	0.967491	-5.74032	0.0449158
STT3B	0.0314337	7.06491	0.126487	0.901783	0.967491	-6.98184	0.0448981
MAGI1-IT1	0.0814788	-3.59997	0.126502	0.901771	0.967491	-5.57242	0.0449037
RP11-449P15.2	-0.224404	-2.91499	-0.127844	0.900736	0.967268	-5.62054	0.0454026
CLIC1	-0.11774	7.22206	-0.128188	0.90047	0.967268	-6.96765	0.0455308
RC3H1-IT1	-0.0997467	-3.62157	-0.128516	0.900216	0.967268	-5.63703	0.045653
MTIF3	-0.0758547	4.70585	-0.127226	0.901212	0.967268	-6.81463	0.0451729
B4GALT1	-0.0624798	3.42913	-0.127075	0.901329	0.967268	-6.38529	0.0451166
MYLK2	-0.0442033	-1.72852	-0.127726	0.900827	0.967268	-5.84742	0.0453587
CUTC	-0.0437747	4.82222	-0.127846	0.900734	0.967268	-6.80648	0.0454037
SURF6	-0.0371217	6.00888	-0.127479	0.901017	0.967268	-6.91052	0.045267
ZNF737	-0.0358829	2.06574	-0.127033	0.901362	0.967268	-6.58953	0.0451009
UBE2H	-0.0356087	6.85171	-0.12869	0.900083	0.967268	-6.95636	0.0457177
EHMT1	-0.0130682	6.1232	-0.127553	0.90096	0.967268	-6.93578	0.0452944
RPS6KB1	-0.0125582	6.29108	-0.127169	0.901257	0.967268	-6.93182	0.0451515
YTHDC2	-0.0123917	6.06158	-0.127213	0.901222	0.967268	-6.94357	0.045168
DGUOK	0.0141463	5.68935	0.127645	0.900889	0.967268	-6.85244	0.0453287
AZIN1	0.0188531	8.82729	0.127565	0.900951	0.967268	-7.06703	0.0452989
GPRASP2	0.0212665	3.71151	0.127462	0.90103	0.967268	-6.61409	0.0452608
L3MBTL3	0.0377189	3.38223	0.128363	0.900335	0.967268	-6.56347	0.045596
SH3TC1	0.0576244	5.21865	0.127503	0.900999	0.967268	-6.87591	0.0452759
RP11-47I22.3	0.0831909	-2.14141	0.127785	0.900781	0.967268	-5.79297	0.0453809
CYB5R1	0.0879043	4.60527	0.127389	0.901087	0.967268	-6.70396	0.0452335
AC017002.2	0.0911567	-3.35242	0.128172	0.900482	0.967268	-5.57281	0.0455249
EPHA10	0.0915546	-2.08323	0.128564	0.90018	0.967268	-5.94221	0.0456708
CTD-3154N5.1	0.103684	-2.79134	0.127245	0.901197	0.967268	-5.66368	0.0451801
KB-1471A8.1	0.106725	-4.44919	0.12795	0.900654	0.967268	-5.63025	0.0454421
KLHDC1	0.137798	-0.595723	0.126964	0.901415	0.967268	-5.85603	0.0450754
RP4-665J23.1	0.168026	-0.0428433	0.127697	0.900849	0.967268	-5.89121	0.0453481
RP11-290H9.4	-0.236048	-2.80143	-0.128858	0.899953	0.967259	-5.632	0.0457802
RP11-171A24.3	-0.0543164	-2.34537	-0.128831	0.899974	0.967259	-5.5397	0.0457702
CTXN1	0.0524029	3.18636	0.128782	0.900011	0.967259	-6.54139	0.0457521
ACOX2	-0.0543164	-4.03252	-0.129064	0.899794	0.967198	-5.53967	0.045857
CLIC2	-0.193127	-1.45091	-0.129472	0.899479	0.967129	-5.66931	0.0460088
STXBP5L	-0.126796	1.04239	-0.129423	0.899517	0.967129	-5.78337	0.0459907
ARSD	-0.124515	3.44456	-0.129233	0.899664	0.967129	-6.58393	0.0459197
FUT4	0.0191852	2.26095	0.129216	0.899676	0.967129	-6.38268	0.0459137
UBE2E1	0.0314594	6.43933	0.129373	0.899555	0.967129	-6.94372	0.0459722
AASDHPPT	0.0332002	6.62801	0.129304	0.899609	0.967129	-7.00233	0.0459462
MEDAG	0.0743906	-3.39083	0.129268	0.899636	0.967129	-5.66853	0.045933
DCST2	-0.153393	-1.39457	-0.131022	0.898283	0.967084	-5.80544	0.0465867
KIAA0825	-0.106283	2.15416	-0.13096	0.898331	0.967084	-6.32204	0.0465638
AGRN	-0.0732155	4.58229	-0.129757	0.899259	0.967084	-6.72059	0.0461152
RBM19	-0.0718441	5.94089	-0.129958	0.899104	0.967084	-6.89144	0.0461902
CHRNA3	-0.0611566	8.25134	-0.13073	0.898509	0.967084	-7.07382	0.0464778
LINC00669	-0.0543164	-2.67708	-0.130257	0.898873	0.967084	-5.53953	0.0463017
TCHP	-0.0409976	4.81957	-0.130765	0.898482	0.967084	-6.81168	0.0464908
GMDS	-0.0340941	2.84426	-0.12981	0.899218	0.967084	-6.38498	0.0461349
CHD3	-0.0334544	5.93379	-0.129809	0.899219	0.967084	-6.93007	0.0461344
KLF6	-0.0307659	5.97846	-0.129856	0.899183	0.967084	-6.9263	0.046152
C17orf59	-0.0289266	2.66664	-0.129763	0.899254	0.967084	-6.50994	0.0461176
VPS54	-0.022116	5.7127	-0.130827	0.898433	0.967084	-6.88613	0.0465141
WDR91	-0.0179072	3.29893	-0.130024	0.899053	0.967084	-6.50797	0.0462148
UBA52	0.0114514	9.58466	0.130709	0.898524	0.967084	-7.09285	0.0464702
TECPR1	0.017088	4.62313	0.129953	0.899108	0.967084	-6.73788	0.0461883
COPB1	0.0174555	7.54127	0.131354	0.898027	0.967084	-6.98184	0.0467105
PCDHA1	0.0282132	-0.875084	0.130698	0.898533	0.967084	-6.14071	0.046466
TINF2	0.0298781	4.74197	0.130971	0.898323	0.967084	-6.73254	0.0465677
SNX4	0.0315523	6.24025	0.131276	0.898087	0.967084	-6.94903	0.0466815
EPT1	0.0354469	7.80868	0.130056	0.899028	0.967084	-7.03605	0.0462267
ZNF736	0.0409661	4.08274	0.130564	0.898636	0.967084	-6.72335	0.0464161
LONP1	0.0417575	7.57138	0.131047	0.898264	0.967084	-7.00264	0.0465962
NOX3	0.0461451	0.836103	0.130672	0.898553	0.967084	-6.38516	0.0464561
CREB3	0.0495109	5.12669	0.131517	0.897902	0.967084	-6.78037	0.0467712
PTGES	0.0522036	2.84176	0.131243	0.898113	0.967084	-6.24655	0.0466692
JOSD2	0.0602328	3.36327	0.130755	0.898489	0.967084	-6.41992	0.0464871
RP11-661A12.14	0.0620272	2.27737	0.131015	0.898288	0.967084	-6.25775	0.0465842
PTPRCAP	0.06874	-1.11313	0.130506	0.898681	0.967084	-5.72081	0.0463944
RP11-557L19.1	0.0901238	-2.59616	0.130419	0.898748	0.967084	-5.76823	0.046362
RP4-597N16.4	0.0946892	-3.32767	0.131071	0.898245	0.967084	-5.58908	0.0466051
SERPINB2	0.341924	-2.09629	0.13105	0.898262	0.967084	-5.53943	0.0465971
XIRP2	0.341924	-1.64102	0.130133	0.898969	0.967084	-5.53955	0.0462554
CCDC142	-0.0229577	3.24035	-0.132208	0.897368	0.966896	-6.4023	0.0470293
OGFOD3	-0.0249639	5.47983	-0.132628	0.897044	0.966618	-6.86337	0.0471863
KCNG4	0.0555995	-4.44497	0.132611	0.897057	0.966618	-5.73713	0.0471798
BCAS4	-0.0246237	2.47465	-0.132808	0.896905	0.96657	-6.43598	0.0472535
TUBB8	-0.168781	-2.29745	-0.133016	0.896745	0.966545	-5.55468	0.0473309
RP11-506M12.1	-0.0748612	-1.25155	-0.132927	0.896813	0.966545	-5.81099	0.0472979
TNFRSF11B	-0.0543164	-3.15847	-0.132908	0.896828	0.966545	-5.53921	0.0472908
CTC-273B12.6	-0.117201	-2.97875	-0.133383	0.896462	0.966367	-5.53915	0.047468
RP11-648K4.2	-0.0567434	-3.92739	-0.13333	0.896502	0.966367	-5.84627	0.0474485
HMCES	0.013041	5.34925	0.13351	0.896364	0.966367	-6.88644	0.0475155
WASF3	0.0739042	4.09146	0.133378	0.896466	0.966367	-6.54186	0.0474663
RANBP17	-0.0618799	4.56732	-0.133798	0.896142	0.966355	-6.86912	0.0476232
MALL	-0.0543164	-3.05244	-0.133658	0.89625	0.966355	-5.53911	0.0475709
TYW5	-0.0272032	4.16774	-0.133622	0.896277	0.966355	-6.69914	0.0475576
FASTKD3	-0.0217317	4.60641	-0.133798	0.896142	0.966355	-6.83498	0.0476234
C5orf47	0.110657	-3.60123	0.133743	0.896184	0.966355	-5.56257	0.0476027
CALM1	0.0570373	9.07699	0.134236	0.895805	0.966134	-7.08797	0.0477867
RP11-348P10.2	-0.107906	-0.637455	-0.134405	0.895674	0.966086	-5.90357	0.0478502
RP11-248J18.2	0.062009	-1.52609	0.134362	0.895707	0.966086	-5.8193	0.0478342
ARAP3	0.0286612	-0.0933747	0.134503	0.895598	0.966085	-6.91764	0.0478867
MICAL2	0.0891516	3.91438	0.134557	0.895556	0.966085	-6.26018	0.0479071
MUC1	-0.115111	-2.13039	-0.134671	0.895468	0.96606	-5.60218	0.0479497
SH2D6	-0.061919	-0.782981	-0.134704	0.895443	0.96606	-5.93012	0.0479621
GDPGP1	-0.0361985	1.25464	-0.135014	0.895204	0.965891	-6.13249	0.0480778
PRR20B	0.0831934	-4.13307	0.135048	0.895178	0.965891	-5.74532	0.0480907
HOXC11	0.041801	-2.82004	0.135542	0.894797	0.965567	-6.08231	0.0482754
HIGD1A	-0.0452	6.63585	-0.135888	0.894531	0.965337	-6.97627	0.0484048
CCDC11	0.134327	-0.758647	0.135985	0.894456	0.965314	-5.70128	0.0484411
HHIP-AS1	0.211546	-2.10284	0.136133	0.894341	0.965249	-5.53978	0.0484966
CTD-2576D5.4	0.0595641	-3.71604	0.136392	0.894142	0.965091	-5.84582	0.0485937
DTX3L	-0.0664976	4.94307	-0.136525	0.894039	0.965038	-6.63197	0.0486435
KLHL25	-0.0388224	3.44424	-0.136602	0.89398	0.965032	-6.52637	0.048672
CGRRF1	-0.0286425	4.02751	-0.136994	0.893678	0.964764	-6.66205	0.0488189
RP11-334C17.5	0.0431049	1.15139	0.137049	0.893635	0.964764	-5.96318	0.0488396
ANKRD50	0.0491421	6.49486	0.137096	0.893599	0.964764	-6.89843	0.0488574
CTC-558O2.1	-0.194943	-3.82445	-0.137274	0.893462	0.964704	-5.56322	0.0489238
HECTD1	-0.0393004	8.04395	-0.13744	0.893334	0.964638	-7.02042	0.048986
ITPA	0.047206	5.95764	0.137422	0.893348	0.964638	-6.94101	0.0489794
PIP5KL1	-0.0498467	-0.0576068	-0.137702	0.893132	0.96452	-5.94778	0.0490844
PCDHGA3	-0.0773228	-1.88852	-0.137776	0.893075	0.964517	-5.90386	0.0491122
BRWD3	-0.0303149	6.07353	-0.138026	0.892883	0.964367	-6.9392	0.0492055
DCAF7	0.0104658	7.95116	0.138272	0.892693	0.96422	-7.02327	0.0492978
RP11-712L6.5	-0.07326	-2.39241	-0.138411	0.892585	0.964161	-5.71487	0.0493502
TEKT4	-0.0906226	-3.50377	-0.13878	0.892301	0.963912	-5.6468	0.0494886
PRDM15	0.0179907	4.11444	0.139012	0.892122	0.963776	-6.67282	0.0495756
DCAF16	-0.0428283	5.59679	-0.139105	0.892051	0.963757	-6.89484	0.0496104
RP11-661O13.1	-0.145355	-3.38396	-0.139737	0.891564	0.963341	-5.56965	0.0498476
RP11-304F15.3	0.133109	-3.72369	0.139674	0.891612	0.963341	-5.53874	0.0498239
NR3C2	-0.102945	-3.37436	-0.139944	0.891405	0.963244	-5.6946	0.0499251
ARFGAP1	-0.0153476	6.45587	-0.139929	0.891416	0.963244	-6.9334	0.0499194
ATP6V1G3	-0.0543164	-3.63001	-0.140082	0.891298	0.963232	-5.53829	0.0499771
CDC73	-0.0189196	5.90798	-0.140232	0.891183	0.963165	-6.89387	0.0500332
LINC01088	-0.140749	-0.706013	-0.140493	0.890981	0.963005	-5.80703	0.0501313
KIAA1217	-0.146218	-1.49567	-0.140644	0.890865	0.962981	-5.67618	0.0501881
EIF4EBP1	-0.0443148	6.53204	-0.140592	0.890905	0.962981	-6.96599	0.0501684
GPR98	-0.275193	-1.26082	-0.141283	0.890373	0.962885	-5.71451	0.0504279
AARD	-0.117201	-1.06747	-0.141382	0.890297	0.962885	-5.53812	0.0504652
ARHGAP33	-0.06177	0.848399	-0.141006	0.890586	0.962885	-6.16221	0.0503242
YBEY	-0.0457637	3.56019	-0.14088	0.890683	0.962885	-6.53904	0.0502768
MED4	-0.0299784	5.88458	-0.141461	0.890236	0.962885	-6.91783	0.0504949
METTL8	0.0375164	4.77172	0.140846	0.89071	0.962885	-6.7183	0.0502638
TIMM50	0.0484418	6.45047	0.140914	0.890657	0.962885	-6.94208	0.0502894
LRP6	0.0488533	6.43544	0.141044	0.890557	0.962885	-6.95101	0.0503383
HSD3B7	0.0551346	0.184595	0.141621	0.890113	0.962885	-5.80899	0.050555
FOXN3-AS1	0.0597282	0.554898	0.141064	0.890541	0.962885	-6.14267	0.0503458
CD14	0.0681715	-0.517984	0.140883	0.890681	0.962885	-6.05808	0.0502779
YAF2	0.0973951	4.45157	0.141435	0.890256	0.962885	-6.77974	0.0504853
BHMT2	0.341924	-1.37168	0.141501	0.890205	0.962885	-5.53811	0.05051
EIF3J-AS1	0.0713236	3.17267	0.141923	0.88988	0.962738	-6.60138	0.0506685
IL1R2	0.189288	-2.84102	0.141949	0.88986	0.962738	-5.53971	0.0506783
MCTP2	-0.0630807	-2.27348	-0.142282	0.889603	0.962554	-5.93661	0.0508035
RP11-110G21.1	0.167775	1.25173	0.142315	0.889578	0.962554	-6.0991	0.0508158
HLA-DMA	0.137099	-1.4785	0.142593	0.889364	0.962411	-5.815	0.0509205
RP11-22P4.1	-0.0985897	-2.94953	-0.142782	0.889218	0.962392	-5.63491	0.0509917
PLAC8L1	-0.0603928	-1.35981	-0.142685	0.889293	0.962392	-5.82727	0.0509549
TNIP3	0.129925	-3.96657	0.142709	0.889275	0.962392	-5.53795	0.0509641
BCL10	0.0514931	4.25349	0.142922	0.889111	0.962367	-6.52649	0.0510442
RP11-1069G10.1	-0.206279	-3.10021	-0.143317	0.888807	0.962269	-5.66798	0.0511927
DRAXIN	-0.147213	-2.03986	-0.143109	0.888966	0.962269	-5.66992	0.0511147
RP11-849F2.7	-0.116464	-1.99418	-0.144592	0.887825	0.962269	-5.78083	0.0516728
FAM124B	-0.0910789	-0.628609	-0.143157	0.888929	0.962269	-6.08981	0.0511327
CHMP6	-0.0853338	3.82858	-0.143525	0.888647	0.962269	-6.4505	0.0512709
CEBPB	-0.0801269	3.71618	-0.143238	0.888867	0.962269	-6.60447	0.0511632
RP11-383G6.3	-0.0755247	-3.08654	-0.144005	0.888277	0.962269	-5.65149	0.0514518
BNIP1	-0.0659724	3.87674	-0.144699	0.887742	0.962269	-6.63538	0.0517132
IGF2R	-0.0646955	7.19803	-0.143478	0.888682	0.962269	-6.98476	0.0512535
CLDN15	-0.0558066	2.05779	-0.143839	0.888405	0.962269	-6.15632	0.0513891
EVC2	-0.0543164	-1.8603	-0.143416	0.88873	0.962269	-5.53785	0.05123
PDLIM7	-0.0401367	3.96438	-0.144414	0.887961	0.962269	-6.70427	0.0516059
RAPGEF6	-0.0320042	3.63311	-0.143153	0.888933	0.962269	-6.59375	0.0511312
ZSCAN29	-0.0199501	5.85573	-0.143303	0.888817	0.962269	-6.89867	0.0511877
UBE2O	0.0185837	6.8309	0.143198	0.888898	0.962269	-6.95438	0.0511482
SLC41A3	0.0334958	4.85852	0.144089	0.888212	0.962269	-6.84238	0.0514833
ATXN7L2	0.0367611	2.9404	0.143622	0.888572	0.962269	-6.45477	0.0513076
RP13-497K6.1	0.0398839	-3.81248	0.143723	0.888494	0.962269	-5.86621	0.0513455
ARAF	0.0584644	4.7425	0.14359	0.888597	0.962269	-6.78782	0.0512954
DUSP11	0.0592804	3.79795	0.144351	0.88801	0.962269	-6.54641	0.0515822
PRR4	0.0686729	1.99077	0.143703	0.888509	0.962269	-6.29109	0.051338
HABP2	0.0903504	-1.19798	0.143384	0.888755	0.962269	-5.94162	0.0512179
IL10RA	0.101937	-2.65612	0.144045	0.888246	0.962269	-5.82868	0.0514668
CTD-2517M22.17	0.114305	-1.57703	0.143122	0.888956	0.962269	-5.71999	0.0511196
GDF5	0.116282	-3.55871	0.144124	0.888185	0.962269	-5.61951	0.0514965
CTXN2	0.139065	-2.15561	0.143443	0.88871	0.962269	-5.87008	0.0512401
SLC35F3	-0.329279	-0.996227	-0.145957	0.886774	0.962257	-5.53757	0.0521873
HIST1H1T	-0.200666	0.267878	-0.146861	0.886078	0.962257	-6.00054	0.0525279
PALM2	-0.144959	-3.76938	-0.145672	0.886994	0.962257	-5.53755	0.0520796
LPAR5	-0.136584	-3.88833	-0.145698	0.886973	0.962257	-5.72753	0.0520896
AC105344.2	-0.123318	-1.23694	-0.146162	0.886616	0.962257	-5.94531	0.0522643
RP11-178G16.4	-0.109428	1.13376	-0.145281	0.887294	0.962257	-6.08963	0.0519324
C14orf37	-0.0781984	-1.65394	-0.14499	0.887519	0.962257	-5.73528	0.0518225
RIPK2	-0.074396	4.10153	-0.145222	0.887339	0.962257	-6.49845	0.0519102
RPF1	-0.0626244	5.55241	-0.146455	0.886391	0.962257	-6.86056	0.0523747
GRIA3	-0.0543164	-2.62271	-0.145998	0.886742	0.962257	-5.5375	0.0522026
RP11-137H2.4	-0.0543164	-3.66806	-0.145607	0.887044	0.962257	-5.53756	0.052055
RP11-510C10.2	-0.0543164	-3.26666	-0.1456	0.887049	0.962257	-5.53756	0.0520526
PRDM11	-0.0536062	1.14	-0.146679	0.886218	0.962257	-6.07659	0.0524593
PUSL1	-0.0448475	4.08936	-0.145891	0.886825	0.962257	-6.73732	0.0521622
PSMC5	-0.0444648	7.53637	-0.145147	0.887398	0.962257	-6.98491	0.0518817
PIGU	-0.0433257	4.68893	-0.145288	0.887289	0.962257	-6.75498	0.0519349
RP11-10A14.4	-0.0414998	0.131314	-0.147087	0.885904	0.962257	-6.10359	0.0526131
ACSF3	-0.0403337	0.75951	-0.147022	0.885954	0.962257	-6.74858	0.0525886
WLS	-0.0385081	6.58371	-0.146741	0.88617	0.962257	-6.8885	0.0524827
FBXL6	-0.0331947	3.62266	-0.145491	0.887132	0.962257	-6.41343	0.0520116
RP11-849H4.2	-0.0327847	1.04545	-0.145864	0.886845	0.962257	-6.18776	0.052152
LINS	-0.0164248	4.6994	-0.1473	0.885741	0.962257	-6.83551	0.0526935
PANK2	-0.0152012	5.72895	-0.146604	0.886276	0.962257	-6.8961	0.0524309
ATF4	0.0188338	8.32821	0.146894	0.886053	0.962257	-7.05985	0.0525403
MED18	0.0225337	3.53852	0.144926	0.887568	0.962257	-6.4136	0.0517984
SLC35E2	0.0342343	3.07908	0.146918	0.886034	0.962257	-6.42149	0.0525496
LARS2	0.0433511	5.17753	0.146206	0.886582	0.962257	-6.85584	0.0522809
GRN	0.0515857	7.18783	0.146824	0.886106	0.962257	-6.94755	0.0525141
MRPL35	0.055977	5.93821	0.145499	0.887126	0.962257	-6.89749	0.0520146
KCTD18	0.065291	4.23819	0.14511	0.887426	0.962257	-6.63634	0.051868
RUNX1T1	0.069424	4.17691	0.146484	0.886368	0.962257	-6.53176	0.0523858
TOR4A	0.078575	1.01994	0.145001	0.88751	0.962257	-5.97639	0.0518269
RP11-523H24.3	0.0992771	-3.30836	0.14563	0.887025	0.962257	-5.67753	0.0520639
CTD-2376I4.2	0.141462	-3.17699	0.145397	0.887205	0.962257	-5.57568	0.051976
RP11-148O21.3	0.142476	-3.11797	0.146811	0.886117	0.962257	-5.70247	0.052509
AC114730.8	0.170227	-2.88735	0.145538	0.887097	0.962257	-5.68485	0.052029
CMAS	0.0436753	5.53957	0.147489	0.885595	0.962199	-6.88018	0.0527651
RP11-68L18.1	-0.111932	-2.19375	-0.147631	0.885486	0.962139	-5.86257	0.0528183
SDCBP2-AS1	0.147104	1.51065	0.147657	0.885465	0.962139	-6.05395	0.0528285
COL25A1	-0.226828	0.677724	-0.148267	0.884996	0.961723	-5.53719	0.0530586
CCNI	-0.0244193	7.70126	-0.148466	0.884843	0.961614	-7.00757	0.0531339
ARF6	0.0409661	6.3155	0.148609	0.884733	0.961553	-6.93009	0.0531877
RP11-286N22.8	0.140561	-3.12417	0.148716	0.884651	0.961522	-5.54251	0.053228
NT5M	-0.0773813	1.94813	-0.148864	0.884537	0.961456	-6.30619	0.053284
GCA	-0.106386	2.64793	-0.148954	0.884468	0.961438	-6.15158	0.053318
PPP1R9A	-0.0431269	2.90178	-0.148988	0.884442	0.961438	-6.21552	0.0533309
TGFBR3	-0.113316	2.41404	-0.149364	0.884152	0.961318	-6.13378	0.053473
MRPL53	0.0369469	1.03208	0.149331	0.884178	0.961318	-6.01268	0.0534604
RP11-1112C15.1	0.121659	-0.392785	0.149236	0.884251	0.961318	-5.94368	0.0534247
RP11-353K11.1	0.2281	-2.86558	0.149245	0.884244	0.961318	-5.62216	0.0534279
RP4-758J18.10	-0.114576	-2.34765	-0.149734	0.883868	0.961133	-5.90234	0.0536128
SRRM1	-0.0260026	5.13988	-0.149852	0.883777	0.961133	-6.78448	0.0536575
MPC1	-0.0213245	4.51482	-0.150092	0.883592	0.961133	-6.91308	0.0537483
NECAB3	0.0184676	4.62701	0.149879	0.883756	0.961133	-6.81432	0.0536678
WDR41	0.0203893	6.21212	0.149796	0.883819	0.961133	-6.94165	0.0536364
TGFBRAP1	0.0237279	4.87886	0.149817	0.883804	0.961133	-6.75027	0.0536441
BAG3	0.0403931	4.85089	0.150197	0.883511	0.961133	-6.74984	0.0537879
CUX2	0.0817073	-0.993757	0.150028	0.883641	0.961133	-6.04233	0.0537239
LINC00152	0.0870704	2.84983	0.149758	0.883849	0.961133	-6.27683	0.053622
SLC30A9	0.0158744	7.45374	0.150373	0.883376	0.961121	-6.98608	0.0538543
THAP9-AS1	0.0442139	5.48105	0.15053	0.883255	0.961047	-6.87727	0.0539138
KCNJ14	0.054629	-0.213178	0.150729	0.883103	0.960939	-5.74767	0.0539889
DCUN1D4	-0.0288575	6.81051	-0.150842	0.883016	0.960907	-6.97589	0.0540317
TM4SF18	0.190072	-2.97315	0.150924	0.882952	0.960907	-5.54411	0.0540628
RP11-95P2.3	0.207771	-3.48711	0.150836	0.88302	0.960907	-5.60815	0.0540293
GRM1	-0.159517	-3.50192	-0.151369	0.88261	0.960672	-5.59789	0.0542311
ZNF836	-0.122478	1.20239	-0.151557	0.882466	0.960672	-6.119	0.0543022
ZNF606	-0.0735235	4.26405	-0.151324	0.882645	0.960672	-6.64902	0.054214
RP11-259N19.1	0.0469195	2.64737	0.151675	0.882375	0.960672	-6.37234	0.0543468
ZNF821	0.0519775	2.69632	0.151365	0.882613	0.960672	-6.46556	0.0542297
MICB	0.111768	-2.17604	0.151596	0.882435	0.960672	-5.78189	0.0543171
KB-431C1.4	0.121032	0.415526	0.151361	0.882616	0.960672	-5.97835	0.0542283
CTD-2537I9.13	-0.109638	-2.66299	-0.151918	0.882188	0.960602	-5.7099	0.054439
VWF	-0.0804152	-3.43758	-0.152457	0.881773	0.960602	-5.75422	0.0546432
MARCH8	-0.0778342	4.65498	-0.152278	0.881911	0.960602	-6.7154	0.0545754
DHRS7B	-0.0511495	2.82713	-0.152011	0.882117	0.960602	-6.44716	0.054474
UBA1	-0.0322175	7.85848	-0.151932	0.882177	0.960602	-7.0279	0.0544443
DMXL2	-0.0193768	6.82015	-0.152438	0.881788	0.960602	-7.00294	0.0546357
IMMP2L	0.073187	3.83304	0.151994	0.88213	0.960602	-6.67284	0.0544676
PLCD1	0.0765477	0.950979	0.152079	0.882064	0.960602	-6.03252	0.0545
C4orf47	0.101959	-0.859469	0.151893	0.882207	0.960602	-5.82738	0.0544294
PLGLB1	0.122735	-2.95845	0.152167	0.881996	0.960602	-5.62753	0.0545334
LA16c-425C2.1	0.138053	-2.88995	0.152511	0.881732	0.960602	-5.65128	0.0546636
KDM5A	0.0131422	7.03201	0.152758	0.881542	0.960515	-6.95674	0.0547572
VASH2	-0.0813255	3.66209	-0.152873	0.881453	0.960477	-6.66416	0.0548007
USP53	0.0776916	5.27404	0.152965	0.881383	0.960458	-6.72401	0.0548353
CCDC125	0.0311372	4.94602	0.153591	0.880901	0.959991	-6.87102	0.0550727
CACNG2	-0.0410956	-3.05388	-0.153681	0.880832	0.959974	-6.05452	0.0551069
LAT2	-0.131357	-0.096229	-0.154248	0.880396	0.959756	-5.99858	0.0553218
ZC3H10	-0.0209269	3.27917	-0.15401	0.880579	0.959756	-6.54675	0.0552316
KIF1B	0.0208596	6.30744	0.154042	0.880555	0.959756	-6.9557	0.0552436
SRBD1	0.0268673	5.21737	0.154351	0.880317	0.959756	-6.8757	0.0553607
TRIM47	0.0431747	4.23859	0.154026	0.880567	0.959756	-6.54032	0.0552374
NRBP2	0.0679804	2.24548	0.154042	0.880555	0.959756	-6.24838	0.0552435
CTC-277H1.7	-0.0865157	-2.34565	-0.154756	0.880006	0.95962	-5.62354	0.0555145
SFT2D2	-0.0635549	5.25374	-0.154864	0.879923	0.95962	-6.71923	0.0555553
SLC50A1	-0.0580107	5.04569	-0.154853	0.879931	0.95962	-6.72262	0.0555513
RPAP3	0.0178724	5.52435	0.154602	0.880124	0.95962	-6.8738	0.0554561
FAM207A	0.0309237	4.56881	0.154588	0.880135	0.95962	-6.82241	0.0554506
FXN	0.0498699	3.48349	0.154908	0.879889	0.95962	-6.61239	0.0555721
RP11-159F24.3	0.0746924	-1.40996	0.154823	0.879954	0.95962	-5.82654	0.0555399
BFSP1	0.12899	-0.547487	0.154601	0.880125	0.95962	-5.90587	0.0554558
FGGY	-0.112265	1.99686	-0.155223	0.879647	0.959618	-6.26288	0.0556916
NCK1	-0.047026	4.8506	-0.155144	0.879707	0.959618	-6.7769	0.0556617
RP2	0.0352099	5.16169	0.155211	0.879656	0.959618	-6.83297	0.0556872
HTR2A	0.129787	-1.59719	0.155225	0.879646	0.959618	-5.68059	0.0556923
SSPN	-0.151288	2.44345	-0.155742	0.879248	0.959596	-6.35927	0.0558884
MX2	-0.144959	-4.27957	-0.157323	0.878033	0.959596	-5.5359	0.056489
TTC9	-0.144959	-1.82545	-0.157302	0.878049	0.959596	-5.53591	0.056481
RP11-410E4.1	-0.144959	-4.08331	-0.156769	0.878459	0.959596	-5.53599	0.0562786
RP11-269F21.3	-0.143406	-1.90912	-0.158392	0.877212	0.959596	-5.53684	0.0568953
BAIAP3	-0.127649	-2.37851	-0.156174	0.878916	0.959596	-5.67464	0.0560524
RP11-563J2.2	-0.119171	-3.05486	-0.157838	0.877637	0.959596	-5.63062	0.0566849
LIPT2	-0.113227	0.403132	-0.158321	0.877266	0.959596	-6.13958	0.0568685
SLCO4A1	-0.112397	4.55939	-0.155447	0.879474	0.959596	-6.72324	0.0557768
UTRN	-0.0882387	2.71152	-0.156277	0.878837	0.959596	-6.88808	0.0560916
SLC8A1	-0.0874116	4.14313	-0.157326	0.878031	0.959596	-6.80012	0.0564901
RP11-65J3.1	-0.0844923	-2.54718	-0.157788	0.877676	0.959596	-5.72681	0.0566658
RP11-42O15.3	-0.0836617	-2.41937	-0.157194	0.878133	0.959596	-5.67351	0.0564399
NR1D2	-0.0755417	5.99586	-0.158079	0.877452	0.959596	-6.87345	0.0567764
SLC31A2	-0.0727344	2.94257	-0.155765	0.879231	0.959596	-6.49792	0.0558972
VTA1	-0.0650468	5.95232	-0.156829	0.878413	0.959596	-6.92202	0.0563013
ZFP2	-0.060115	-0.373195	-0.157014	0.878271	0.959596	-5.94388	0.0563715
COMT	-0.0462523	5.58176	-0.155535	0.879407	0.959596	-6.91728	0.05581
CCDC134	-0.0225339	2.57587	-0.155879	0.879143	0.959596	-6.46245	0.0559404
CHD4	0.0134344	9.08909	0.157871	0.877612	0.959596	-7.0732	0.0566973
ASIC1	0.0168152	3.77952	0.158255	0.877317	0.959596	-6.79352	0.0568434
NUP93	0.0211299	6.74663	0.156541	0.878634	0.959596	-6.96216	0.0561921
BTF3L4	0.0213518	6.35814	0.155842	0.879172	0.959596	-6.9326	0.0559264
SDCCAG8	0.0213635	4.97483	0.15777	0.87769	0.959596	-6.74822	0.0566589
PICK1	0.0254541	3.95341	0.156064	0.879	0.959596	-6.62862	0.0560109
NOP9	0.0264344	6.13686	0.15578	0.879219	0.959596	-6.92965	0.055903
DHX35	0.0368627	4.12014	0.155749	0.879243	0.959596	-6.65104	0.0558911
BRMS1	0.0371163	5.58895	0.156706	0.878507	0.959596	-6.88411	0.0562546
PPID	0.0417498	6.54814	0.15733	0.878028	0.959596	-6.92164	0.0564918
RP11-390B4.5	0.0418346	-0.19272	0.156706	0.878508	0.959596	-5.93773	0.0562545
COMMD2	0.0482668	6.00819	0.157057	0.878238	0.959596	-6.91118	0.0563879
RP11-548H3.1	0.0494231	-0.955078	0.155483	0.879447	0.959596	-5.82797	0.0557903
CNPY2	0.0510472	3.64151	0.156347	0.878783	0.959596	-6.62089	0.0561182
ZBTB17	0.0612389	4.48868	0.156422	0.878725	0.959596	-6.62892	0.0561469
ASAP2	0.0621371	6.12923	0.155973	0.879071	0.959596	-6.89418	0.0559761
FAM169A	0.0830373	3.68874	0.157519	0.877883	0.959596	-6.42497	0.0565634
C1QTNF2	0.0871525	-1.80526	0.157609	0.877814	0.959596	-5.86168	0.0565977
RP11-760H22.2	0.0872919	-0.550858	0.155655	0.879315	0.959596	-6.02955	0.0558557
CTD-2132N18.4	0.0904745	-1.58149	0.15567	0.879303	0.959596	-5.86517	0.0558612
IFI30	0.0992705	-3.78925	0.156527	0.878645	0.959596	-5.58977	0.0561866
CDH18	0.109238	2.69827	0.155536	0.879406	0.959596	-6.51468	0.0558106
RP13-131K19.2	0.11855	-1.61566	0.157944	0.877556	0.959596	-5.90562	0.056725
REPS2	0.156289	0.504286	0.156204	0.878893	0.959596	-5.82351	0.0560639
PDZRN3-AS1	0.204542	-1.88429	0.158059	0.877468	0.959596	-5.70249	0.0567686
ERI3-IT1	0.10653	-3.38915	0.158554	0.877088	0.959546	-5.55917	0.0569569
RP11-48G14.1	-0.144959	-4.48436	-0.158735	0.876949	0.959452	-5.5357	0.0570258
AC016730.1	0.0308797	-2.79992	0.1589	0.876822	0.959372	-6.12321	0.0570884
CXorf40A	-0.0352607	3.34559	-0.159114	0.876657	0.959249	-6.54831	0.0571702
RP11-269G24.4	0.0443793	0.606372	0.159422	0.876421	0.959093	-6.23627	0.0572873
RBBP9	0.0724209	5.20466	0.159369	0.876461	0.959093	-6.78683	0.0572673
FAM195A	-0.0283249	4.55363	-0.159551	0.876322	0.959057	-6.78444	0.0573363
AC074091.13	-0.0977741	-2.87377	-0.159662	0.876237	0.959057	-5.69319	0.0573785
NMT1	0.0494252	7.58655	0.159698	0.876209	0.959057	-6.98784	0.0573923
RP11-710C12.1	0.173163	3.25487	0.15962	0.876269	0.959057	-6.66604	0.0573626
AC093323.3	0.0631266	4.48014	0.160026	0.875957	0.95889	-6.75022	0.0575173
CSRP2	-0.154232	4.01047	-0.160219	0.875809	0.958811	-6.43158	0.0575906
LINC00920	-0.133909	0.655983	-0.160249	0.875786	0.958811	-6.08716	0.057602
LNPEP	-0.0627836	5.79423	-0.160306	0.875742	0.958811	-6.90197	0.0576238
DZANK1	-0.0478649	2.52729	-0.160295	0.87575	0.958811	-6.30228	0.0576197
H6PD	0.149464	3.64948	0.16019	0.875831	0.958811	-6.44621	0.0575795
COL7A1	0.372581	1.78659	0.160218	0.87581	0.958811	-5.8267	0.0575901
TRAPPC6A	-0.113862	3.17697	-0.160623	0.875499	0.958796	-6.64797	0.0577443
VAPA	0.0238447	7.35831	0.160694	0.875445	0.958796	-6.96954	0.0577714
AHNAK	0.0581706	7.09769	0.16066	0.87547	0.958796	-6.86681	0.0577586
RPRML	-0.130718	-1.79438	-0.160894	0.875291	0.958786	-5.84649	0.0578476
CTC-360G5.9	0.115103	-3.56125	0.160843	0.87533	0.958786	-5.60446	0.0578283
FLJ27365	-0.0392271	3.09755	-0.161356	0.874936	0.95847	-6.58463	0.0580239
PEBP1	-0.0303921	8.5565	-0.161416	0.87489	0.95847	-7.05927	0.0580467
KLHL28	-0.0660793	5.8945	-0.161631	0.874725	0.958356	-6.89339	0.0581286
GALNT1	0.0501418	6.63589	0.161721	0.874655	0.958338	-6.89081	0.058163
KB-1572G7.2	0.108399	-2.47881	0.161933	0.874493	0.958258	-5.69726	0.0582435
CEACAM19	0.12163	-1.62314	0.161886	0.874529	0.958258	-5.86194	0.0582257
XYLT1	-0.125375	2.99774	-0.162042	0.87441	0.958243	-6.27568	0.0582851
AFTPH	-0.0239802	5.32902	-0.162068	0.87439	0.958243	-6.78618	0.0582951
PCDH17	-0.107244	5.07104	-0.162258	0.874243	0.958177	-6.92878	0.0583678
AC005532.5	0.129925	-3.68495	0.162281	0.874226	0.958177	-5.53517	0.0583763
HIGD1C	-0.142841	-1.36969	-0.162456	0.874091	0.958141	-6.24248	0.0584432
RPL26	-0.0428891	6.68706	-0.162439	0.874104	0.958141	-6.97387	0.0584368
NSUN2	-0.0447381	7.30012	-0.16258	0.873997	0.95814	-6.98269	0.0584903
C1orf54	-0.106059	0.337501	-0.162761	0.873857	0.958046	-5.81036	0.0585594
VEGFA	-0.0230487	6.51369	-0.162857	0.873783	0.958039	-6.96211	0.0585962
RP11-390F4.10	0.167211	-4.16586	0.162838	0.873799	0.958039	-5.60553	0.0585887
AC011995.1	0.118946	-3.18792	0.163045	0.87364	0.957982	-5.86636	0.0586676
ANGPTL4	-0.223998	1.73014	-0.163276	0.873462	0.957888	-6.05926	0.0587559
LINC00887	0.122531	-1.83839	0.163225	0.873502	0.957888	-5.77177	0.0587363
ACSS3	-0.139864	-0.641505	-0.16358	0.873229	0.957706	-5.53607	0.0588719
C20orf24	0.0514643	3.139	0.163683	0.87315	0.957677	-6.44805	0.0589114
GNA13	-0.0569629	7.34496	-0.163858	0.873015	0.957588	-6.97654	0.0589782
LRRC4B	0.0742887	0.389648	0.164126	0.87281	0.957421	-5.99547	0.0590803
BBS1	0.0501761	-0.100439	0.164379	0.872616	0.957266	-5.99159	0.0591769
OTUD6B	0.0185243	5.3733	0.164559	0.872478	0.957215	-6.88888	0.0592456
FAM183A	0.129925	-3.97395	0.164509	0.872516	0.957215	-5.53483	0.0592267
WBP1	0.0898479	2.03989	0.164773	0.872313	0.957109	-6.12434	0.0593276
SLC7A1	-0.0531407	6.43121	-0.165342	0.871876	0.956912	-6.94926	0.059545
SRFBP1	-0.0334092	5.27585	-0.165122	0.872045	0.956912	-6.86584	0.059461
RPL35A	0.0248493	9.52199	0.165195	0.87199	0.956912	-7.10041	0.0594886
RP11-513G11.4	0.0749273	-0.903546	0.165077	0.87208	0.956912	-6.06097	0.0594435
CTD-2184D3.5	0.129925	-3.1948	0.165077	0.87208	0.956912	-5.53474	0.0594435
CDC42	-0.0233336	8.23425	-0.165528	0.871734	0.956823	-7.01155	0.0596158
LRRC37A	-0.0347069	2.18447	-0.165603	0.871677	0.956818	-6.17326	0.0596446
DCAF15	0.057975	4.35683	0.165654	0.871637	0.956818	-6.74617	0.0596641
ENTPD6	-0.0268986	5.75524	-0.165852	0.871486	0.956725	-6.87619	0.0597398
TCP11L1	0.0267737	4.21931	0.165996	0.871375	0.956661	-6.61778	0.059795
RP1-102H19.8	-0.170415	-2.2155	-0.166075	0.871315	0.956653	-5.8034	0.059825
PDXDC2P	-0.0471425	3.0909	-0.166312	0.871133	0.956653	-6.41707	0.0599156
SEMA3E	-0.0261208	3.2646	-0.166081	0.87131	0.956653	-6.77199	0.0598272
ZNF667	0.0754087	3.62432	0.166212	0.87121	0.956653	-6.7271	0.0598773
RP11-1000B6.3	0.253387	-2.5117	0.166269	0.871165	0.956653	-5.60762	0.0598994
TBC1D22B	-0.0621275	3.55954	-0.166562	0.870941	0.956534	-6.54306	0.0600112
CCT4	-0.0240052	8.43878	-0.166664	0.870863	0.956506	-7.03098	0.0600504
PRR18	0.100482	-3.26588	0.166871	0.870704	0.95639	-5.82336	0.0601296
PDCD11	-0.0332044	7.76069	-0.16709	0.870536	0.956264	-6.992	0.0602132
ZNF517	-0.0608563	2.31197	-0.167219	0.870437	0.956217	-6.18437	0.0602626
RNF11	0.021787	6.11072	0.167214	0.87044	0.956217	-6.8942	0.0602609
AC005546.2	-0.104116	-2.68886	-0.167617	0.870132	0.955995	-5.69153	0.0604148
C16orf47	-0.168327	-3.70565	-0.168283	0.869621	0.955727	-5.67855	0.0606698
LRRC8B	-0.0841275	5.45316	-0.16825	0.869646	0.955727	-6.79477	0.0606574
ACP5	-0.0676587	0.574738	-0.168102	0.86976	0.955727	-6.18415	0.0606006
MRPL1	-0.0638134	4.81679	-0.168573	0.869399	0.955727	-6.83491	0.0607811
WASH4P	-0.0420684	1.64252	-0.168922	0.869131	0.955727	-6.12641	0.0609146
ZDHHC3	-0.0380451	5.24382	-0.168507	0.869449	0.955727	-6.85199	0.0607558
SEC24B	-0.016256	5.70858	-0.168801	0.869224	0.955727	-6.85046	0.0608684
FAM134A	0.0135383	6.6588	0.168491	0.869461	0.955727	-6.94277	0.0607497
TSPAN3	0.0393475	8.46895	0.168195	0.869689	0.955727	-7.05957	0.0606362
ACSL4	0.0497565	6.85997	0.168665	0.869328	0.955727	-6.97071	0.0608163
STAT2	0.0513941	5.01951	0.168004	0.869835	0.955727	-6.58446	0.0605632
LZTS3	0.0817131	2.84219	0.168213	0.869675	0.955727	-6.39033	0.060643
SPTB	0.0818855	0.516227	0.168413	0.869522	0.955727	-6.4515	0.0607196
ARVCF	0.10733	5.07023	0.168009	0.869831	0.955727	-6.94231	0.0605652
ITPRIP	0.202357	0.424401	0.168698	0.869303	0.955727	-5.65601	0.060829
EVA1A	-0.422134	-0.893924	-0.169341	0.86881	0.955654	-5.5998	0.0610753
RP1-224A6.3	-0.175673	-4.01257	-0.169138	0.868965	0.955654	-5.53411	0.0609975
AC083867.4	-0.142601	-2.75587	-0.169433	0.868739	0.955654	-5.76217	0.0611106
AC093382.1	-0.117843	-3.72474	-0.169488	0.868697	0.955654	-5.65116	0.0611318
ATM	0.0389343	6.88517	0.169245	0.868883	0.955654	-6.98868	0.0610385
RP11-807H7.1	0.0853615	-0.841622	0.169133	0.868969	0.955654	-5.82892	0.0609957
TAPT1-AS1	0.0977134	0.495546	0.169127	0.868974	0.955654	-6.0178	0.0609931
GTF2IRD2B	0.178673	2.34848	0.16937	0.868788	0.955654	-6.3235	0.0610864
MUC13	-0.422799	-2.72734	-0.16991	0.868374	0.95546	-5.53399	0.0612933
TMEM245	0.018265	6.94663	0.169931	0.868357	0.95546	-6.96317	0.0613015
ZXDA	0.0322487	2.77562	0.17007	0.868251	0.95546	-6.40501	0.0613546
PROX1	0.046528	5.34938	0.169926	0.868362	0.95546	-6.92665	0.0612994
NAMA	-0.162038	-3.99625	-0.170443	0.867965	0.955454	-5.66843	0.0614976
KCNH3	-0.149202	1.27379	-0.170787	0.867701	0.955454	-5.88769	0.0616298
CLDN12	-0.120658	5.45744	-0.170448	0.867962	0.955454	-6.88592	0.0614995
EVI5L	-0.0814017	2.92227	-0.170245	0.868117	0.955454	-6.49835	0.0614218
RP11-666A8.12	-0.0758741	-0.449328	-0.170427	0.867978	0.955454	-5.97178	0.0614914
TMA16	-0.0227859	6.00939	-0.17027	0.868098	0.955454	-6.91638	0.0614312
SCML1	0.0300092	4.59089	0.170555	0.867879	0.955454	-6.76761	0.0615407
THAP8	0.0341459	1.96471	0.170529	0.867899	0.955454	-6.26488	0.0615307
CLDND1	0.0466064	6.44758	0.170816	0.867679	0.955454	-6.92544	0.0616407
ZNF346-IT1	0.0590477	-2.23668	0.170535	0.867895	0.955454	-5.75266	0.061533
DHRS4L2	0.0643415	2.94253	0.17045	0.867959	0.955454	-6.48886	0.0615006
CARF	0.0745593	3.11063	0.170194	0.868156	0.955454	-6.46496	0.0614021
LINC00890	0.098404	-1.07037	0.170301	0.868074	0.955454	-6.11619	0.0614431
HEXB	0.0250599	6.53083	0.171094	0.867466	0.955452	-6.92284	0.0617474
CTD-2383M3.1	-0.178488	-2.18335	-0.171278	0.867325	0.955355	-5.81413	0.0618181
EGLN2	0.0311919	2.99483	0.171401	0.867231	0.95531	-6.47408	0.0618653
RP11-352B15.2	-0.0956545	-4.27089	-0.171517	0.867142	0.955271	-5.70761	0.0619099
MRPS35	-0.0240162	6.66448	-0.171516	0.867143	0.955271	-6.95198	0.0619094
ZACN	-0.18636	-3.11471	-0.172008	0.866766	0.955145	-5.59936	0.0620982
RAD23B	0.0337638	8.91589	0.171804	0.866922	0.955145	-7.06567	0.0620199
AFAP1	0.0404835	6.60129	0.171842	0.866893	0.955145	-6.95891	0.0620344
ITGA6	0.172324	5.46879	0.171893	0.866854	0.955145	-6.75399	0.0620542
C19orf47	-0.0742747	3.46588	-0.172147	0.866659	0.955128	-6.51382	0.0621515
ZNF627	-0.0592498	4.87274	-0.172494	0.866394	0.955128	-6.80594	0.0622848
EEFSEC	0.0393113	3.88302	0.172199	0.86662	0.955128	-6.68891	0.0621715
TMEM70	0.0469968	5.11562	0.172342	0.86651	0.955128	-6.85684	0.0622266
BOLA1	0.0522844	3.42867	0.172214	0.866608	0.955128	-6.44057	0.0621772
LINC00623	0.141146	0.93326	0.172244	0.866585	0.955128	-5.9822	0.0621889
CACNA1D	0.300187	-3.25435	0.1721	0.866695	0.955128	-5.56152	0.0621335
RP11-666A8.8	-0.128079	-3.41218	-0.172684	0.866248	0.955044	-5.59551	0.0623578
RP11-661A12.12	0.196077	-2.16429	0.17277	0.866182	0.955029	-5.61739	0.0623908
TMEM248	-0.0161681	7.06808	-0.172855	0.866117	0.955016	-6.96937	0.0624235
PLEKHA3	-0.103491	4.1288	-0.172969	0.866029	0.954997	-6.55323	0.0624674
UBE4A	-0.0573612	6.12451	-0.172947	0.866047	0.954997	-6.93582	0.0624588
CNEP1R1	-0.0486385	4.21664	-0.173051	0.865967	0.954997	-6.68174	0.0624987
ASH1L	0.0367473	6.40988	0.173009	0.865999	0.954997	-6.93025	0.0624827
TMEM35	0.0826666	-0.591706	0.172981	0.866021	0.954997	-5.95767	0.0624718
EMP1	0.331262	1.37886	0.173136	0.865902	0.954997	-5.76387	0.0625315
ZGLP1	-0.15649	-1.83931	-0.173687	0.86548	0.95496	-5.73037	0.0627432
ZNF23	-0.0624924	1.14704	-0.173405	0.865695	0.95496	-6.13278	0.062635
ZNF668	0.0245687	4.197	0.173554	0.865581	0.95496	-6.66224	0.0626922
SULT4A1	0.0581936	2.1823	0.173418	0.865685	0.95496	-6.42602	0.0626399
RIN1	0.129964	3.18639	0.173532	0.865598	0.95496	-6.39857	0.0626835
ZBTB7C	0.156608	-1.9534	0.173477	0.86564	0.95496	-5.8815	0.0626627
CSF1	0.0538037	4.1107	0.173848	0.865356	0.954936	-6.56645	0.0628053
NOV	0.178239	-0.201187	0.173853	0.865352	0.954936	-5.90139	0.0628072
IFLTD1	-0.12857	-1.18915	-0.174172	0.865108	0.95488	-5.97163	0.0629297
RP11-111M22.4	-0.0839443	-2.24045	-0.174053	0.865199	0.95488	-5.9149	0.0628838
ACTRT3	0.0385041	0.708121	0.174063	0.865191	0.95488	-6.13637	0.062888
PYCR1	0.0856466	6.87344	0.174164	0.865114	0.95488	-6.97178	0.0629266
UNC5B	-0.088632	6.57523	-0.174396	0.864936	0.95486	-6.99274	0.0630158
ANKRD10-IT1	-0.0606912	0.57333	-0.174907	0.864545	0.95486	-6.02938	0.0632126
NCK2	-0.0469143	4.66063	-0.175077	0.864415	0.95486	-6.65606	0.0632777
UGCG	-0.0436549	6.11215	-0.174629	0.864758	0.95486	-6.93475	0.0631056
GPBP1L1	-0.0399754	6.6341	-0.175341	0.864213	0.95486	-6.92558	0.0633792
PEMT	-0.039574	3.48225	-0.174823	0.864609	0.95486	-6.58708	0.06318
SNRNP27	-0.0385208	4.06576	-0.175139	0.864367	0.95486	-6.59572	0.0633018
TOM1	-0.0255454	4.2901	-0.175107	0.864392	0.95486	-6.75234	0.0632892
ANKIB1	-0.0163861	7.09901	-0.174672	0.864725	0.95486	-6.96033	0.0631219
ATP5J	0.024712	7.32016	0.174876	0.864569	0.95486	-6.98408	0.0632004
FTH1	0.0302876	8.59867	0.174808	0.864621	0.95486	-7.01123	0.0631742
ADRA2C	0.0377127	4.43722	0.174704	0.864701	0.95486	-6.80604	0.0631343
AKR1B1	0.0425298	6.96672	0.175412	0.864158	0.95486	-6.97512	0.0634069
CBWD7	0.042854	2.38224	0.174392	0.864939	0.95486	-6.32289	0.0630144
CTBP1	0.0620721	6.94427	0.174439	0.864904	0.95486	-6.96071	0.0630323
METAP1D	0.0941024	2.82056	0.175423	0.86415	0.95486	-6.49406	0.063411
CTD-2631K10.1	0.139851	-2.95951	0.174449	0.864896	0.95486	-5.70639	0.0630362
RP1-161P9.5	0.196818	-3.9596	0.175408	0.864161	0.95486	-5.65462	0.0634053
APOA1	0.209453	-3.32758	0.174352	0.86497	0.95486	-5.69766	0.0629989
CNIH4	-0.0449822	6.55234	-0.175786	0.863872	0.954813	-6.9307	0.0635505
SF3B3	-0.0220251	8.30537	-0.175721	0.863921	0.954813	-7.02362	0.0635258
AC092159.2	-0.18507	-3.33736	-0.176401	0.863401	0.954791	-5.57805	0.0637875
EML5	-0.155079	6.27409	-0.175908	0.863778	0.954791	-6.9945	0.0635977
CTD-2366F13.1	-0.122629	1.52503	-0.176145	0.863597	0.954791	-6.14671	0.0636889
B4GALNT4	-0.104029	1.15947	-0.176147	0.863595	0.954791	-6.33646	0.0636897
NOL4	-0.0707109	-0.647377	-0.176404	0.863399	0.954791	-6.80663	0.0637884
SDCBP2	-0.0690909	-0.0694323	-0.175886	0.863795	0.954791	-5.97993	0.0635892
FOXP4	0.0327473	2.99189	0.176344	0.863445	0.954791	-6.3652	0.0637655
SERINC5	0.0651401	4.3466	0.175922	0.863768	0.954791	-6.85612	0.063603
UFM1	0.0741226	6.62242	0.176239	0.863525	0.954791	-6.94449	0.0637252
LENG9	0.128954	3.09602	0.176409	0.863395	0.954791	-6.40484	0.0637906
BAIAP2L2	0.196176	-3.98144	0.175953	0.863744	0.954791	-5.55895	0.0636151
RP11-84C13.2	-0.161553	-3.04453	-0.176743	0.863139	0.954709	-5.63833	0.0639192
RP11-1186N24.5	-0.0410816	3.6576	-0.177146	0.862831	0.954426	-6.51759	0.0640745
CSNK2A1	-0.0235841	7.61509	-0.177222	0.862773	0.954421	-6.9678	0.0641036
PARP8	0.0985135	2.46327	0.177412	0.862627	0.954318	-5.99589	0.0641768
IGF2	-0.0179233	7.68911	-0.177594	0.862487	0.954222	-7.0212	0.0642472
CTB-152G17.6	-0.0760128	-1.44641	-0.177706	0.862402	0.954187	-5.72998	0.0642901
INTS7	-0.024046	5.90679	-0.178323	0.86193	0.953723	-6.91504	0.064528
PATL2	0.221635	-1.50785	0.178371	0.861893	0.953723	-5.71111	0.0645465
ZNF491	-0.0541151	0.81882	-0.178863	0.861517	0.953554	-6.24665	0.0647362
TGM1	0.0794429	-0.701233	0.178682	0.861655	0.953554	-5.7991	0.0646665
DGCR11	0.0970333	1.30335	0.178758	0.861597	0.953554	-6.21945	0.0646961
RP11-428J1.5	0.137127	-0.441183	0.178897	0.861491	0.953554	-5.83729	0.0647493
MYO1D	0.139828	-0.517943	0.17866	0.861672	0.953554	-5.77842	0.0646581
SLC25A13	-0.0161358	6.58988	-0.179086	0.861346	0.953516	-6.95991	0.0648224
XPR1	0.0646655	7.61981	0.179127	0.861314	0.953516	-7.00264	0.0648383
APOL3	0.129925	-2.97129	0.179255	0.861217	0.953516	-5.53247	0.0648875
STXBP6	0.275094	-1.20849	0.17905	0.861373	0.953516	-5.93641	0.0648086
CYHR1	-0.0824868	4.55028	-0.179336	0.861155	0.953508	-6.64012	0.0649189
RP11-82L2.1	-0.0903003	-1.57624	-0.179538	0.861	0.953395	-5.79586	0.0649968
PBX2	-0.0627049	5.78656	-0.179906	0.860719	0.953142	-6.88468	0.0651387
RP11-346C20.3	-0.182566	-2.83158	-0.180523	0.860246	0.9531	-5.6772	0.0653772
LTBP1	-0.181118	3.09908	-0.180139	0.860541	0.9531	-6.20715	0.0652287
CTSB	-0.108838	7.27025	-0.180024	0.860628	0.9531	-6.98	0.0651846
SAMD10	-0.0822067	2.56548	-0.180796	0.860038	0.9531	-6.2312	0.0654826
NFKBIB	-0.069082	4.53142	-0.180478	0.860281	0.9531	-6.75555	0.0653597
OSBPL11	0.038995	5.31014	0.18003	0.860623	0.9531	-6.83201	0.0651868
H2AFY2	0.0399929	6.09787	0.18016	0.860524	0.9531	-6.92661	0.0652371
WDR4	0.0519968	4.29169	0.180257	0.86045	0.9531	-6.7871	0.0652743
BBS5	0.052665	1.83859	0.180499	0.860265	0.9531	-6.11636	0.0653678
TLE4	0.0660682	6.1704	0.180185	0.860505	0.9531	-6.93138	0.0652466
MESP1	0.0767124	0.730563	0.180124	0.860552	0.9531	-6.15444	0.0652229
ACADVL	0.0922959	6.12779	0.180841	0.860003	0.9531	-6.89739	0.0655
AGTR2	0.129925	-4.17172	0.180204	0.86049	0.9531	-5.53231	0.065254
PTGER2	0.14332	5.02765	0.18074	0.860081	0.9531	-6.92438	0.0654608
OCLN	-0.130391	0.0576343	-0.181373	0.859596	0.953071	-5.87311	0.0657055
HADHA	-0.0279451	8.46484	-0.181119	0.859791	0.953071	-7.06277	0.0656073
ESCO1	0.0278264	5.52656	0.181166	0.859755	0.953071	-6.78939	0.0656253
RTEL1-TNFRSF6B	0.0686626	0.419157	0.181027	0.859861	0.953071	-6.00135	0.0655717
PHF7	0.0727646	1.33808	0.181058	0.859837	0.953071	-6.14194	0.0655837
RP11-1060J15.4	0.126264	-3.45327	0.181276	0.859671	0.953071	-5.53677	0.0656679
RP11-28H5.2	0.163831	-4.02768	0.181141	0.859774	0.953071	-5.53275	0.0656157
RP11-128A17.1	-0.152554	-2.17282	-0.181728	0.859325	0.952925	-5.77605	0.0658426
ZNRF2	-0.0448273	4.46148	-0.181682	0.85936	0.952925	-6.67653	0.0658248
ZSCAN20	-0.0362407	2.87352	-0.181826	0.85925	0.95292	-6.27487	0.0658806
C11orf80	0.0285055	2.35846	0.181985	0.859128	0.952911	-6.39012	0.0659421
STAG3L5P-PVRIG2P-PILRB	0.0320312	2.32141	0.181906	0.859189	0.952911	-6.30296	0.0659113
AQP3	0.10319	1.81246	0.181943	0.85916	0.952911	-6.29514	0.0659259
STXBP3	0.0221364	4.97608	0.182124	0.859022	0.952901	-6.76943	0.0659959
PPIL4	-0.0344188	4.83012	-0.182196	0.858967	0.952899	-6.84922	0.0660236
RAB4A	0.0404718	5.85651	0.182256	0.858921	0.952899	-6.9123	0.0660467
FCRLB	-0.0617172	-2.28313	-0.182416	0.858799	0.952874	-5.88716	0.0661087
BICD1	-0.0310643	4.40366	-0.182364	0.858839	0.952874	-6.84196	0.0660884
RP11-624L4.1	-0.144959	-3.35214	-0.182733	0.858556	0.952678	-5.53188	0.0662312
ACTN2	-0.10052	0.364306	-0.182932	0.858404	0.952678	-5.86546	0.0663083
CDPF1	-0.0895732	1.87836	-0.183005	0.858348	0.952678	-6.29751	0.0663366
VPS29	-0.054879	5.26119	-0.182736	0.858554	0.952678	-6.85387	0.0662325
RP11-16O9.2	0.150247	-3.37126	0.182851	0.858466	0.952678	-5.64648	0.0662768
NDRG2	-0.0952419	3.13049	-0.183314	0.858112	0.952478	-6.55462	0.0664559
CTSL	-0.0705903	6.30232	-0.183373	0.858067	0.952478	-6.893	0.0664789
ATP13A3	-0.173502	8.26114	-0.184052	0.857548	0.952002	-7.01415	0.0667417
SEMA3D	-0.0819401	4.14878	-0.184245	0.8574	0.952002	-6.64397	0.0668165
GLI4	-0.0592403	2.07819	-0.184042	0.857555	0.952002	-6.07185	0.066738
DTX3	-0.0482955	4.85211	-0.184352	0.857319	0.952002	-6.85949	0.0668578
CCZ1B	-0.021889	6.29362	-0.184275	0.857377	0.952002	-6.91558	0.0668281
CDK5	0.0415649	5.07933	0.18455	0.857167	0.952002	-6.79828	0.0669346
MID1	0.0648506	4.52973	0.184012	0.857578	0.952002	-6.74861	0.0667264
RAD21-AS1	0.215665	0.236142	0.184415	0.85727	0.952002	-5.76795	0.0668823
IGSF11	0.250834	-3.76051	0.184028	0.857566	0.952002	-5.53894	0.0667325
NUDT19	-0.0307414	5.0454	-0.184896	0.856903	0.95178	-6.76656	0.0670685
CPT1B	-0.0692864	-2.13746	-0.185088	0.856756	0.951685	-5.71905	0.0671428
FAM102A	-0.0430668	4.33076	-0.185128	0.856725	0.951685	-6.66895	0.0671585
ZBTB8B	0.107785	-0.433795	0.185077	0.856765	0.951685	-5.72289	0.0671385
LY6K	0.341924	-2.89078	0.185299	0.856595	0.951672	-5.53144	0.0672247
KIF1A	0.0686225	3.94744	0.185783	0.856225	0.951404	-6.97246	0.0674122
RP1-125I3.2	0.234858	-3.76376	0.185713	0.856278	0.951404	-5.5576	0.067385
COL24A1	0.238134	-2.22734	0.185683	0.856301	0.951404	-5.60854	0.0673736
XX-CR54.3	-0.103484	-0.353563	-0.185939	0.856106	0.951363	-5.90989	0.0674727
SYNE3	-0.0818291	2.2461	-0.186066	0.856008	0.951363	-6.28527	0.067522
WDR83OS	0.0384308	6.06297	0.185961	0.856089	0.951363	-6.90273	0.0674812
KIAA1549	0.0345479	5.43414	0.186339	0.8558	0.951249	-6.86034	0.0676279
EIF2B4	0.0529695	4.84494	0.18628	0.855845	0.951249	-6.81054	0.067605
MYCBPAP	-0.190214	-1.46054	-0.186671	0.855546	0.951036	-5.66492	0.0677565
KIAA1430	-0.0586462	7.72328	-0.186669	0.855548	0.951036	-6.97571	0.0677557
RP13-131K19.7	0.193953	-2.53605	0.186748	0.855487	0.951036	-5.81998	0.0677864
RAD1	-0.0448346	5.51494	-0.187012	0.855286	0.950921	-6.87007	0.0678887
RP11-1017G21.5	0.0860828	0.50051	0.187268	0.85509	0.950762	-6.04577	0.067988
PEX14	-0.0486424	3.33275	-0.187357	0.855022	0.950745	-6.53839	0.0680228
RALGDS	0.0718183	6.93012	0.187499	0.854914	0.950683	-6.99878	0.0680777
RP11-572M11.4	0.17961	-1.83817	0.187658	0.854792	0.950606	-5.76568	0.0681396
RNF208	0.0553974	0.151004	0.187739	0.85473	0.950596	-5.98499	0.0681709
RP11-159N11.4	-0.109099	-2.54121	-0.188149	0.854417	0.950307	-5.70639	0.0683299
AL450992.2	-0.208898	-3.59697	-0.188487	0.854159	0.950078	-5.73236	0.0684614
RP11-436H11.5	0.128868	-3.92931	0.188551	0.85411	0.950078	-5.64491	0.0684861
KCTD14	-0.1148	-2.45922	-0.188863	0.853872	0.949876	-5.80089	0.0686072
C2orf27B	-0.13936	-3.20405	-0.189463	0.853414	0.949751	-5.61387	0.0688403
ATP6V0E1	-0.071869	6.0891	-0.18926	0.853569	0.949751	-6.92059	0.0687616
SLC39A8	-0.0704749	4.94471	-0.189568	0.853334	0.949751	-6.67616	0.0688812
CLP1	-0.046652	4.33773	-0.189346	0.853503	0.949751	-6.61092	0.0687948
ALG14	-0.036473	3.28786	-0.189117	0.853677	0.949751	-6.50236	0.0687062
CDC40	-0.0225191	5.90192	-0.189118	0.853677	0.949751	-6.92285	0.0687065
APPBP2	0.0256728	6.92149	0.189079	0.853707	0.949751	-6.93632	0.0686913
MAST4	0.0429139	4.46052	0.189375	0.853481	0.949751	-6.62587	0.0688062
FAAH	0.123932	-0.134429	0.189287	0.853548	0.949751	-6.06538	0.0687721
NFYA	0.0437443	5.72411	0.189923	0.853062	0.949561	-6.86545	0.0690193
RP11-586K2.1	-0.141369	-3.63542	-0.190096	0.85293	0.949509	-5.55712	0.0690864
IQGAP1	-0.0461037	6.96923	-0.190053	0.852963	0.949509	-6.94994	0.0690697
TPD52	-0.0399902	5.76193	-0.190087	0.852937	0.949509	-6.94509	0.0690829
PIP4K2B	0.0161245	6.78344	0.190261	0.852805	0.949508	-6.94837	0.0691505
ZNF688	-0.0655284	2.34285	-0.190357	0.852731	0.949485	-6.29778	0.0691882
TNNI3K	-0.172208	-3.94232	-0.190487	0.852631	0.949433	-5.54598	0.0692387
RP11-276E15.4	-0.167371	-2.40533	-0.190803	0.85239	0.949263	-5.66118	0.0693616
INO80E	0.0566087	5.03812	0.190756	0.852426	0.949263	-6.77525	0.0693431
GRIN1	-0.116011	-1.80753	-0.190919	0.852302	0.949241	-6.06287	0.0694066
LMNA	0.0637133	7.5985	0.190976	0.852259	0.949241	-6.96695	0.0694286
BEND7	0.129925	-1.23124	0.191117	0.852151	0.94919	-5.53043	0.0694836
XPNPEP1	-0.0174449	6.59995	-0.191274	0.852031	0.949148	-6.9462	0.0695445
SELT	0.0436051	7.21302	0.19137	0.851957	0.949148	-6.99397	0.0695821
GTF2E1	0.0986517	5.26456	0.191236	0.85206	0.949148	-6.8135	0.0695299
ASL	-0.0873849	3.84828	-0.191645	0.851747	0.94913	-6.68954	0.0696892
AJ271736.10	-0.0869816	-1.49023	-0.191464	0.851886	0.94913	-5.75203	0.0696187
USP40	0.0396927	4.92548	0.19154	0.851828	0.94913	-6.75307	0.0696483
FOXD1	0.111765	0.46382	0.191519	0.851844	0.94913	-6.19606	0.06964
ZNF160	-0.0312015	5.00621	-0.191886	0.851564	0.949006	-6.78731	0.0697828
NEU3	0.0194973	3.96364	0.192038	0.851448	0.948935	-6.76672	0.0698421
PRMT1	-0.0466488	8.13376	-0.192201	0.851323	0.948855	-7.02995	0.0699055
UNC13A	-0.0923592	5.43137	-0.192301	0.851247	0.948828	-6.94836	0.0699445
LY6E	-0.0434507	6.40734	-0.192645	0.850985	0.948595	-6.93466	0.0700783
THRA	0.0321499	5.54669	0.192694	0.850947	0.948595	-6.91167	0.0700976
SCD	0.0620224	8.98128	0.192713	0.850933	0.948595	-7.07036	0.0701047
CSRP1	-0.0885085	3.63223	-0.192985	0.850725	0.948579	-6.44377	0.0702106
PTCH1	-0.0395089	4.57746	-0.193012	0.850705	0.948579	-6.77355	0.0702212
IP6K2	0.0270539	5.4107	0.192908	0.850784	0.948579	-6.89679	0.0701808
RP11-611L7.1	0.0271177	4.63153	0.192993	0.850719	0.948579	-6.66208	0.0702138
CISH	0.0395573	1.96159	0.19287	0.850813	0.948579	-6.28708	0.0701661
RP11-148B6.2	0.139187	-3.84838	0.193287	0.850495	0.948518	-5.63997	0.0703283
SIPA1	-0.104814	3.66434	-0.193723	0.850162	0.948362	-6.34468	0.0704984
TJP2	-0.0821451	6.23483	-0.193538	0.850303	0.948362	-6.84823	0.0704264
XRCC4	-0.0803093	4.24446	-0.193626	0.850236	0.948362	-6.64318	0.0704604
RP11-774O3.3	0.113859	-0.836237	0.19354	0.850301	0.948362	-5.82209	0.0704271
PAWR	0.314394	0.232116	0.193715	0.850168	0.948362	-5.53035	0.0704954
ANKRD18B	-0.0646638	2.12289	-0.194068	0.849899	0.948248	-6.50154	0.0706326
SLIT3	-0.0553624	7.27349	-0.19427	0.849745	0.948248	-7.01196	0.0707115
PHLDB3	-0.0408268	2.08721	-0.194273	0.849743	0.948248	-6.22905	0.0707126
C19orf70	0.0207557	5.33157	0.194222	0.849781	0.948248	-6.83718	0.070693
EBP	0.0314164	6.01139	0.19404	0.84992	0.948248	-6.94124	0.0706221
ADAMTSL2	0.0734426	1.69617	0.194017	0.849938	0.948248	-6.33663	0.070613
LINC00266-1	0.0903077	-2.15421	0.19406	0.849905	0.948248	-5.73371	0.0706296
RAP1GAP2	0.0400294	5.48522	0.19458	0.849508	0.948179	-6.92834	0.0708325
RP11-214K3.21	0.0831683	-2.25453	0.194665	0.849443	0.948166	-5.71972	0.0708656
BBC3	-0.101677	2.45545	-0.194844	0.849306	0.948103	-6.45715	0.0709356
CNPY4	-0.101051	3.82077	-0.194864	0.849291	0.948103	-6.53399	0.0709433
MFF	-0.0242266	6.68094	-0.19538	0.848898	0.948103	-6.94687	0.0711446
SMARCAD1	0.0158968	7.34024	0.195093	0.849117	0.948103	-6.98654	0.0710327
WNT3	0.0591289	2.91792	0.194807	0.849335	0.948103	-6.29966	0.0709211
ZNF682	0.0592429	2.05902	0.195198	0.849037	0.948103	-6.31543	0.0710733
RAB21	0.0748614	6.84361	0.195459	0.848837	0.948103	-6.95687	0.0711754
C1orf52	0.0806918	4.56616	0.195253	0.848995	0.948103	-6.62449	0.071095
RP11-206L10.10	0.100566	-0.939702	0.194949	0.849227	0.948103	-5.89964	0.0709764
VWA7	0.119432	-1.01475	0.194891	0.849271	0.948103	-5.83387	0.0709536
CTD-2313J17.1	0.201918	-3.796	0.194998	0.84919	0.948103	-5.58664	0.0709953
GOLGA6A	0.260774	-2.68435	0.19512	0.849097	0.948103	-5.63505	0.0710429
RP11-53B2.2	-0.193176	-2.40331	-0.195647	0.848694	0.948092	-5.73954	0.0712489
ERI2	-0.0362988	5.27226	-0.195664	0.848681	0.948092	-6.82714	0.0712554
RP11-618K13.2	0.162064	-3.2953	0.195815	0.848566	0.948067	-5.53124	0.0713143
SSBP4	-0.0206958	5.54424	-0.195936	0.848474	0.948022	-6.90824	0.0713614
HACE1	-0.0684202	4.91161	-0.196076	0.848368	0.947962	-6.79927	0.0714159
RHOT2	-0.0361981	6.11713	-0.19631	0.848188	0.947868	-6.90948	0.0715076
RP11-91I8.3	0.15186	-3.52509	0.196255	0.848231	0.947868	-5.5638	0.071486
RARB	-0.112015	0.968707	-0.196585	0.847979	0.947795	-5.83454	0.071615
RP11-216B9.6	-0.0959871	-1.14856	-0.196745	0.847857	0.947795	-5.82997	0.0716773
UTP20	-0.0460427	7.17672	-0.196478	0.848061	0.947795	-6.9697	0.0715731
ANKRD28	-0.0397572	5.54324	-0.196655	0.847926	0.947795	-6.82711	0.0716421
RPS16	-0.0308891	8.42983	-0.196662	0.84792	0.947795	-7.04266	0.0716449
AFG3L2	-0.027947	6.7481	-0.196646	0.847932	0.947795	-6.93342	0.0716388
CHRM2	0.242937	0.558026	0.196508	0.848038	0.947795	-6.00403	0.0715846
SLC8B1	-0.107587	1.61394	-0.196985	0.847674	0.947785	-5.91835	0.0717711
AC004840.8	0.160244	-3.97378	0.196973	0.847684	0.947785	-5.59084	0.0717662
RP4-635E18.7	0.197146	-2.21757	0.197007	0.847657	0.947785	-5.7117	0.0717798
SNRPB2	0.0218156	6.95243	0.197186	0.847521	0.94778	-6.95633	0.0718495
RP5-882C2.2	0.0971271	-0.876118	0.197541	0.84725	0.947535	-5.80085	0.0719883
SIAH2	0.0346925	5.22258	0.197925	0.846957	0.947267	-6.86174	0.0721384
ZNRF3	-0.0210039	5.04049	-0.198129	0.846802	0.947152	-6.79442	0.0722181
ATP11B	-0.0199329	6.14431	-0.19844	0.846565	0.946945	-6.88211	0.0723397
ZNF182	-0.0493258	3.55554	-0.198696	0.84637	0.946786	-6.56212	0.0724397
ATP5F1	-0.0299692	8.39939	-0.198966	0.846165	0.946615	-7.05604	0.0725452
ZNF157	0.0464648	0.594997	0.199106	0.846058	0.946574	-6.13075	0.0726
NUDT14	0.139897	1.1693	0.199082	0.846076	0.946574	-6.15837	0.0725908
LINC00471	-0.134946	0.0151881	-0.199223	0.845968	0.946571	-6.03419	0.072646
KLHDC10	-0.0178512	6.25275	-0.199234	0.84596	0.946571	-6.9297	0.0726501
TNRC6B	0.123591	5.50792	0.199508	0.845751	0.946446	-6.89643	0.0727573
RP11-715J22.4	0.10391	-0.699316	0.199714	0.845594	0.946329	-5.86583	0.072838
C1orf86	-0.0576256	4.35778	-0.200123	0.845283	0.946039	-6.76205	0.0729981
CREG2	-0.23987	-2.81152	-0.200192	0.84523	0.946039	-5.52923	0.0730251
SRC	0.0516279	4.50111	0.200307	0.845142	0.945999	-6.63957	0.0730701
CTD-3093M3.1	-0.0996005	-0.911235	-0.200635	0.844892	0.945861	-5.79195	0.0731986
SMAD3	-0.0941065	4.84919	-0.200886	0.844701	0.945861	-6.60259	0.0732968
ARHGEF12	-0.0306151	7.82881	-0.200549	0.844958	0.945861	-7.0288	0.073165
PQBP1	-0.0206955	5.29054	-0.200538	0.844966	0.945861	-6.88157	0.0731607
SRRM3	0.0265569	3.2666	0.20097	0.844637	0.945861	-6.81369	0.0733298
LRRC4C	0.0869023	4.12938	0.200748	0.844806	0.945861	-6.50401	0.0732429
PIPOX	0.124928	-0.368964	0.20054	0.844965	0.945861	-5.99568	0.0731613
NFE2	0.225183	-3.55428	0.200726	0.844823	0.945861	-5.63775	0.0732341
DYRK4	0.0995851	3.31789	0.201297	0.844389	0.945684	-6.67181	0.0734577
OTUD5	-0.0330086	5.20453	-0.201375	0.844329	0.945676	-6.8179	0.0734883
RP11-111A21.1	0.106805	-2.89681	0.201433	0.844284	0.945676	-5.61033	0.0735113
PITRM1-AS1	-0.104643	-1.72056	-0.201796	0.844008	0.945451	-5.69017	0.0736534
RP11-98G7.1	-0.100829	-2.62532	-0.202026	0.843833	0.945451	-5.75283	0.0737434
RGS2	0.213319	6.92354	0.201967	0.843878	0.945451	-6.89927	0.0737205
PDCD1LG2	0.314166	-1.74657	0.201775	0.844024	0.945451	-5.52848	0.0736452
KIAA1549L	0.341924	-1.41326	0.201887	0.843939	0.945451	-5.52846	0.0736888
ZMIZ2	0.0630539	3.80698	0.202206	0.843696	0.945377	-6.44552	0.0738142
NPEPL1	-0.147886	0.510378	-0.2027	0.84332	0.945349	-5.91593	0.0740078
MICALCL	-0.137478	1.74572	-0.2028	0.843244	0.945349	-6.25117	0.0740468
FRY	-0.0528868	3.83517	-0.202374	0.843568	0.945349	-6.85625	0.0738799
ZNF562	0.0275708	6.21673	0.202572	0.843418	0.945349	-6.92718	0.0739574
CUZD1	0.0771126	0.982026	0.202452	0.843509	0.945349	-6.10118	0.0739103
RP11-761E20.1	0.0865308	-1.43002	0.202518	0.843458	0.945349	-5.80355	0.0739365
RP11-392P7.6	0.104413	-1.41479	0.202705	0.843316	0.945349	-6.29193	0.0740096
SERTAD4-AS1	0.104822	0.493562	0.20242	0.843533	0.945349	-5.89795	0.073898
LHPP	0.189402	1.33731	0.202308	0.843618	0.945349	-6.10356	0.0738542
FBXO48	-0.098163	0.13487	-0.202941	0.843136	0.945338	-5.85687	0.0741023
PIEZO2	-0.249519	1.52455	-0.203919	0.842392	0.945324	-5.81501	0.0744859
C12orf75	-0.242856	4.57155	-0.203652	0.842595	0.945324	-6.51061	0.0743812
ZNF487	-0.185265	0.429249	-0.203078	0.843032	0.945324	-5.91902	0.074156
CKAP4	-0.0672933	6.51681	-0.203134	0.842989	0.945324	-6.90385	0.0741781
PRELID1	-0.0451772	7.98469	-0.203298	0.842864	0.945324	-7.00592	0.0742424
PPM1K	-0.0354826	3.86758	-0.203114	0.843004	0.945324	-6.45976	0.0741702
SLC35A1	-0.0326151	3.45587	-0.203413	0.842777	0.945324	-6.52743	0.0742872
HSPBP1	0.0382162	5.20126	0.20346	0.842741	0.945324	-6.84128	0.0743059
WDR92	0.0467701	2.39318	0.20312	0.843	0.945324	-6.25442	0.0741724
AC007292.6	0.0907672	-1.10587	0.203925	0.842387	0.945324	-5.79376	0.0744882
BCO2	0.0926317	-0.680759	0.203256	0.842897	0.945324	-5.8899	0.0742257
JSRP1	0.127978	-1.28541	0.203026	0.843071	0.945324	-5.82381	0.0741356
PARP15	0.145889	-3.66497	0.203363	0.842815	0.945324	-5.58314	0.0742679
EPS8	0.228552	2.27049	0.203079	0.843031	0.945324	-5.90813	0.0741562
C2	0.267867	-3.17591	0.203815	0.842471	0.945324	-5.6248	0.0744452
USP25	0.0331074	5.52782	0.204181	0.842193	0.94522	-6.83896	0.0745886
RP11-379F4.9	0.287975	-2.52668	0.204367	0.842051	0.945119	-5.65212	0.0746617
COA4	-0.0407393	5.95191	-0.204638	0.841845	0.944947	-6.94231	0.074768
KIAA0430	-0.022699	5.39368	-0.204835	0.841695	0.944874	-6.83007	0.0748454
U52111.14	0.0616244	0.17167	0.204792	0.841727	0.944874	-5.94952	0.0748288
SNHG8	0.0511327	7.33285	0.204962	0.841598	0.944846	-6.96781	0.0748953
CYTH2	-0.0298603	4.83637	-0.205145	0.841458	0.944748	-6.80343	0.0749675
POF1B	-0.134134	-3.42328	-0.205297	0.841343	0.944678	-5.86214	0.0750268
ENOX2	0.0571822	4.18106	0.205484	0.841201	0.944678	-6.6767	0.0751003
NARFL	0.063558	4.17365	0.20543	0.841242	0.944678	-6.69859	0.0750792
TSHZ2	0.0653506	4.58937	0.205306	0.841336	0.944678	-6.8912	0.0750304
WNT5A	0.341924	-0.632884	0.205338	0.841312	0.944678	-5.5278	0.0750432
CTC-546K23.1	0.0543712	-1.36263	0.206103	0.84073	0.944283	-6.48763	0.0753436
GFPT2	-0.186187	1.93253	-0.206304	0.840577	0.944283	-5.93436	0.0754226
LINC00663	-0.156547	-0.0857275	-0.206203	0.840654	0.944283	-5.88435	0.0753829
DHFRL1	-0.0370774	3.59718	-0.206332	0.840556	0.944283	-6.65084	0.0754335
RP11-159F24.5	0.101619	-2.20121	0.206172	0.840677	0.944283	-5.68002	0.0753708
TLR2	-0.266316	-1.33412	-0.206554	0.840387	0.944192	-5.52757	0.0755209
RP11-155G14.6	-0.14413	0.0663003	-0.206716	0.840264	0.944175	-5.98599	0.0755845
SGK494	-0.0776836	0.369587	-0.206791	0.840206	0.944175	-6.01974	0.0756142
ZNF7	-0.0268506	4.94519	-0.206948	0.840087	0.944175	-6.61811	0.075676
SDHC	0.0214105	6.42918	0.206669	0.840299	0.944175	-6.92078	0.0755663
SRF	0.0759092	4.84673	0.206642	0.84032	0.944175	-6.77399	0.0755554
MDGA1	0.149076	2.02097	0.206689	0.840284	0.944175	-6.48171	0.0755741
WDR17	0.0510367	4.74682	0.207203	0.839893	0.944103	-6.81071	0.075776
RRAGC	0.108507	4.03072	0.207139	0.839941	0.944103	-6.47485	0.075751
NUDT3	0.0863456	6.79843	0.207347	0.839783	0.944043	-6.93605	0.0758327
SLITRK6	-0.105175	3.55154	-0.207561	0.83962	0.944033	-6.39941	0.0759172
PSMB2	-0.0940335	6.81654	-0.207427	0.839722	0.944033	-6.93718	0.0758645
TAF11	-0.040174	5.87073	-0.207478	0.839684	0.944033	-6.88856	0.0758843
CTD-2341M24.1	-0.185446	-0.646621	-0.207825	0.83942	0.943992	-5.75098	0.0760207
PA2G4	-0.0312322	7.60513	-0.207735	0.839488	0.943992	-7.00553	0.0759853
CTD-2349P21.5	0.116081	-3.41312	0.207846	0.839404	0.943992	-5.65015	0.0760292
[truncated: 16,038 more rows]

## Sheet: SKNAS
Gene	logFC	AveExpr	t	PValue	adjPVal	B	score
BMX	-5.55162	-0.875432	-12.6654	1.06e-06	0.00166165	5.22924	5.97469
CDC42SE2	1.79059	5.74797	15.3491	2.3e-07	0.00166165	7.55976	6.63827
CENPF	-1.32826	8.33173	-12.3738	1.28e-06	0.00166165	6.12431	5.89279
CLU	1.73862	6.30823	12.6157	1.1e-06	0.00166165	6.21142	5.95861
HDGF	-1.63072	8.1711	-12.4807	1.19e-06	0.00166165	6.19217	5.92445
IGF2	-1.40453	7.57826	-12.4974	1.18e-06	0.00166165	6.20302	5.92812
JMJD6	-1.62474	4.34005	-13.438	6.65e-07	0.00166165	6.72321	6.17718
KTN1	-1.70222	8.60315	-14.512	3.6e-07	0.00166165	7.36875	6.4437
RBM3	-1.38969	6.63305	-12.8498	9.48e-07	0.00166165	6.40806	6.02319
RBMX	-1.36086	8.33159	-12.8535	9.46e-07	0.00166165	6.42318	6.02411
RBMXL1	-1.43606	5.39624	-12.8507	9.47e-07	0.00166165	6.40353	6.02365
SKA2	-1.6538	6.16698	-12.5861	1.12e-06	0.00166165	6.24671	5.95078
THY1	2.0085	6.84021	16.0707	1.59e-07	0.00166165	7.92616	6.7986
TLE2	-3.31638	1.86214	-13.6504	5.87e-07	0.00166165	6.16013	6.23136
CHRNB2	2.43568	4.45124	12.2626	1.37e-06	0.00166517	5.41474	5.86328
CPXM1	-1.63322	3.69126	-11.8853	1.75e-06	0.0017692	5.78462	5.75696
GADD45B	2.80848	1.77628	11.731	1.94e-06	0.0017692	4.5973	5.7122
GXYLT1	-1.5557	4.97683	-11.7485	1.92e-06	0.0017692	5.71834	5.7167
LHX1	-2.15443	1.17089	-11.8857	1.75e-06	0.0017692	5.5056	5.75696
MAOB	-3.46342	-1.6499	-11.7915	1.87e-06	0.0017692	4.86645	5.72816
HTR2B	-2.60207	2.30688	-11.3207	2.57e-06	0.00222646	5.19692	5.59007
CASC5	-1.9262	5.76756	-11.1332	2.92e-06	0.0024108	5.30858	5.53462
GRAP2	-4.3742	-0.565244	-11.076	3.04e-06	0.0024108	4.27646	5.51713
TRIB2	-1.37479	7.19241	-10.9884	3.24e-06	0.00245777	5.20536	5.48945
CCDC43	-1.27321	5.54967	-10.8048	3.69e-06	0.00258645	5.07857	5.43297
MORC4	-1.83934	4.25401	-10.8522	3.57e-06	0.00258645	5.11249	5.44733
ASPM	-1.64437	7.35106	-10.6806	4.04e-06	0.00262729	4.97373	5.39362
PTMA	-1.29431	9.73957	-10.687	4.02e-06	0.00262729	4.94873	5.39577
CKMT1B	2.22976	3.4829	10.5578	4.42e-06	0.0026822	4.31721	5.35458
GNAS	-0.841355	10.4745	-10.5998	4.28e-06	0.0026822	4.87108	5.36856
AJUBA	2.44215	3.3546	10.4204	4.89e-06	0.00287285	4.74995	5.31069
OTUD3	1.29038	4.9499	10.3723	5.07e-06	0.00288437	4.74944	5.29499
USP46	-1.09075	4.85181	-10.3076	5.32e-06	0.00293559	4.71925	5.27409
CKMT1A	2.53838	3.40511	10.1014	6.21e-06	0.00314491	4.00281	5.20691
LIN7C	-0.940674	6.57648	-10.115	6.15e-06	0.00314491	4.55816	5.21112
MFN2	1.167	7.00689	10.1058	6.19e-06	0.00314491	4.5552	5.20831
AK4	-1.64777	3.41376	-9.93406	7.07e-06	0.00322186	4.42646	5.15058
FAM160B1	1.26169	4.97959	9.92351	7.13e-06	0.00322186	4.42623	5.14691
FKTN	-1.44258	4.50681	-9.90096	7.25e-06	0.00322186	4.41497	5.13966
MDFI	-2.64299	2.6198	-9.93406	7.07e-06	0.00322186	4.43123	5.15058
PPP1R16B	-2.4042	5.49857	-9.94977	6.98e-06	0.00322186	4.45205	5.15614
FARS2	-1.5201	4.7468	-9.83977	7.6e-06	0.00329852	4.36371	5.11919
SPG20	-1.06784	6.22229	-9.79726	7.86e-06	0.00333067	4.30938	5.10458
AGPAT4	-1.51208	3.60288	-9.44795	1.04e-05	0.0035822	4.0273	4.98297
ATP8B3	-2.98811	-1.66187	-9.6029	9.17e-06	0.0035822	3.41037	5.03763
CHML	-1.42538	5.98993	-9.59795	9.2e-06	0.0035822	4.15903	5.03621
FOXP1	-1.16092	4.85168	-9.55669	9.51e-06	0.0035822	4.14582	5.02182
GALNT1	-2.86108	7.00847	-9.56377	9.46e-06	0.0035822	4.09341	5.02411
HIST1H4J	-1.43313	7.1723	-9.4429	1.04e-05	0.0035822	4.01203	4.98297
HIST1H4K	-1.41735	7.16751	-9.4547	1.03e-05	0.0035822	4.02196	4.98716
RP11-109E24.1	-2.97765	-1.27994	-9.59201	9.25e-06	0.0035822	3.10626	5.03386
TEX19	-2.54502	0.611758	-9.53932	9.64e-06	0.0035822	3.75674	5.01592
THSD7A	-1.98936	5.8066	-9.49621	9.98e-06	0.0035822	4.08563	5.00087
SLC16A3	-2.95717	2.06851	-9.38957	1.09e-05	0.00367107	4.01608	4.96257
LBR	-2.03007	6.77869	-9.29588	1.17e-05	0.00375765	3.89626	4.93181
MEG3	-1.42613	5.84804	-9.29468	1.18e-05	0.00375765	3.92852	4.92812
SLC3A2	1.3847	6.996	9.33454	1.14e-05	0.00375765	3.94978	4.9431
ANPEP	-1.71576	2.04037	-9.21951	1.25e-05	0.00383933	3.87981	4.90309
EFR3A	-1.27771	6.42382	-9.23743	1.23e-05	0.00383933	3.84567	4.91009
MAPK6	-2.25966	6.74273	-9.20615	1.26e-05	0.00383933	3.81279	4.89963
ZNF792	-1.62545	4.97301	-9.18024	1.29e-05	0.00385815	3.84546	4.88941
IFI16	-1.29081	4.57312	-9.15744	1.32e-05	0.00386831	3.8068	4.87943
EDN3	-2.97417	-1.31069	-9.10346	1.38e-05	0.00398165	3.5472	4.86012
NEXN	2.55074	0.392733	9.07861	1.41e-05	0.00400154	3.16474	4.85078
PSMD7	-0.829454	7.26229	-9.02486	1.47e-05	0.00412138	3.65862	4.83268
NOTCH3	-1.79241	2.01423	-8.9962	1.51e-05	0.00415792	3.69793	4.82102
GIPC3	-3.86012	-2.36668	-8.84638	1.71e-05	0.00458207	3.0026	4.767
HIST1H3I	-1.82892	5.80685	-8.85595	1.7e-05	0.00458207	3.5382	4.76955
HERPUD2	1.95327	4.93533	8.77637	1.82e-05	0.00479467	3.5157	4.73993
PAEP	-4.4337	-0.427871	-8.73322	1.88e-05	0.00490505	3.14743	4.72584
LANCL2	1.13596	5.56133	8.65562	2.02e-05	0.00517209	3.3898	4.69465
GABBR2	-2.75483	-0.140812	-8.61292	2.09e-05	0.00523301	3.04025	4.67985
TFDP1	-0.956696	6.90055	-8.61027	2.1e-05	0.00523301	3.2988	4.67778
INA	1.61257	4.84125	8.56411	2.18e-05	0.00537501	3.30657	4.66154
RPL4	-0.684136	10.8885	-8.47048	2.37e-05	0.00575918	3.07123	4.62525
GLDC	-3.99228	0.56283	-8.41364	2.49e-05	0.00597725	3.10221	4.6038
AK5	1.54193	3.38506	8.36447	2.61e-05	0.00608499	3.14882	4.58336
MT-CYB	1.1934	6.94518	8.36714	2.6e-05	0.00608499	3.08801	4.58503
GOLGA4	-0.951978	6.54519	-8.30785	2.74e-05	0.00632069	3.03167	4.56225
ARRB1	-1.16168	4.69469	-8.27848	2.81e-05	0.00640881	3.08817	4.55129
CITED2	1.45855	3.18459	8.21614	2.98e-05	0.00669664	2.97472	4.52578
HOMEZ	-1.25023	2.72239	-8.19035	3.05e-05	0.00674549	3.00858	4.5157
SH3BP2	-1.21947	4.17795	-8.18128	3.07e-05	0.00674549	2.97247	4.51286
HSPA1B	1.05345	7.12462	8.1591	3.14e-05	0.00680119	2.88741	4.50307
IDH2	-1.18831	5.68646	-8.10951	3.28e-05	0.00690571	2.88635	4.48413
INIP	0.979525	5.80379	8.10404	3.3e-05	0.00690571	2.88372	4.48149
NUPL1	-0.819189	6.89094	-8.12571	3.23e-05	0.00690571	2.85031	4.4908
HSPA12A	-1.62908	2.42001	-8.04428	3.48e-05	0.00700948	2.86997	4.45842
MIR17HG	-1.22959	3.40962	-8.04867	3.47e-05	0.00700948	2.88329	4.45967
MRPS6	-1.03076	5.03292	-8.03894	3.5e-05	0.00700948	2.81439	4.45593
STAT6	-1.22876	2.04538	-8.0482	3.47e-05	0.00700948	2.87989	4.45967
ZFYVE9	-1.37202	5.06224	-8.02333	3.55e-05	0.00703397	2.7998	4.44977
ARID3A	-1.4421	3.53064	-8.01112	3.59e-05	0.00703737	2.84841	4.44491
RP11-395B7.7	-1.18183	2.70745	-7.99644	3.64e-05	0.00705774	2.83705	4.4389
KLHDC9	2.69881	0.847443	7.97453	3.72e-05	0.00712684	2.36521	4.42946
SH2D2A	-1.80419	0.91111	-7.91851	3.92e-05	0.00743029	2.68759	4.40671
ESYT2	-1.40693	5.57765	-7.90603	3.96e-05	0.00743989	2.66063	4.4023
NUS1	-1.08457	6.2314	-7.87975	4.06e-05	0.0075474	2.64054	4.39147
CCL7	-4.57528	-2.86025	-7.85017	4.17e-05	0.00762305	2.34677	4.37986
CERS2	0.731966	8.02379	7.84761	4.18e-05	0.00762305	2.55815	4.37882
KIAA1715	-0.960392	5.34444	-7.83082	4.25e-05	0.00766783	2.61744	4.37161
EPHB2	-1.40272	4.58054	-7.79738	4.39e-05	0.00783607	2.59259	4.35754
SPARC	1.0326	8.96758	7.75266	4.58e-05	0.00809578	2.3938	4.33913
CCDC3	-2.09803	3.34627	-7.74061	4.63e-05	0.00811023	2.5707	4.33442
GAS2L3	-1.00271	4.87319	-7.69515	4.83e-05	0.00835371	2.50237	4.31605
TUBB4B	-1.0491	8.05673	-7.68959	4.86e-05	0.00835371	2.38886	4.31336
C1QTNF1	0.971886	3.2697	7.66311	4.99e-05	0.00848804	2.50797	4.3019
NEK2	-0.935825	5.33162	-7.63233	5.13e-05	0.00866155	2.41201	4.28988
SDC3	-0.914479	4.39434	-7.60569	5.27e-05	0.00880494	2.39181	4.27819
MRPL3	-0.898169	7.24975	-7.57032	5.45e-05	0.00891173	2.29999	4.2636
MT-ND4	2.00082	7.53844	7.57187	5.44e-05	0.00891173	2.30379	4.2644
RBM17	-0.831695	6.0658	-7.55592	5.53e-05	0.00891173	2.31266	4.25728
TCEAL8	-0.804525	5.61834	-7.55835	5.51e-05	0.00891173	2.32438	4.25885
KRT16	-2.52113	-2.32964	-7.48105	5.95e-05	0.00933679	2.08407	4.22548
POLR3G	-2.26196	3.55178	-7.4821	5.94e-05	0.00933679	2.33227	4.22621
TOP1	-1.47465	6.61519	-7.49461	5.87e-05	0.00933679	2.23444	4.23136
ANKRD37	-1.50578	1.84967	-7.4394	6.19e-05	0.00956022	2.3134	4.20831
MKNK1	-1.21831	2.87748	-7.4444	6.16e-05	0.00956022	2.32114	4.21042
MPST	-0.991919	5.07299	-7.42252	6.3e-05	0.00957278	2.23484	4.20066
SAPCD2	-1.8301	5.13474	-7.42094	6.31e-05	0.00957278	2.25404	4.19997
IFNGR2	-0.712358	5.89582	-7.37774	6.58e-05	0.00982485	2.12437	4.18177
SREK1IP1	-0.942223	5.10511	-7.381	6.56e-05	0.00982485	2.18398	4.1831
ERGIC2	-1.64796	6.32674	-7.36362	6.67e-05	0.00985334	2.10268	4.17587
PSMD1	-0.910812	7.87973	-7.35835	6.71e-05	0.00985334	2.05942	4.17328
RP1-153G14.4	3.90514	-3.10551	7.33447	6.87e-05	0.0100083	1.11297	4.16304
C10orf54	2.18956	0.316575	7.23721	7.57e-05	0.0106845	1.91158	4.1209
COL4A6	-1.85991	-0.087097	-7.23981	7.55e-05	0.0106845	2.12987	4.12205
IFI44L	-2.15851	-1.4631	-7.24272	7.52e-05	0.0106845	2.06535	4.12378
TOM1L2	1.3429	3.66497	7.25928	7.4e-05	0.0106845	2.14905	4.13077
CCNB2	-1.04549	5.61124	-7.21792	7.71e-05	0.0107338	1.9918	4.11295
NBPF12	0.826902	4.92828	7.21727	7.72e-05	0.0107338	2.02356	4.11238
CCBE1	3.98346	-0.569267	7.20091	7.85e-05	0.0108289	1.31138	4.10513
EIF4B	-0.622507	9.56266	-7.18408	7.98e-05	0.010931	1.82702	4.098
CCL2	-1.74695	4.47659	-7.15975	8.18e-05	0.0110364	1.85785	4.08725
SSBP2	-0.912052	6.57995	-7.16537	8.13e-05	0.0110364	1.89938	4.08991
BLCAP	0.953969	5.28955	7.14476	8.3e-05	0.011056	1.97616	4.08092
FGF7	2.12177	-0.131949	7.12565	8.47e-05	0.011056	1.7903	4.07212
MT-CO3	0.88735	10.279	7.14025	8.34e-05	0.011056	1.77824	4.07883
PADI3	-4.8654	-2.28678	-7.12203	8.5e-05	0.011056	1.80225	4.07058
SLC16A14	3.40221	0.801372	7.12301	8.49e-05	0.011056	1.61355	4.07109
THOC2	-0.696295	7.05365	-7.10574	8.64e-05	0.0111605	1.81889	4.06349
HAS2	-1.97462	3.40362	-7.08644	8.81e-05	0.0112397	1.8475	4.05502
SHROOM4	-2.78468	0.144837	-7.08492	8.82e-05	0.0112397	1.71484	4.05453
TBC1D1	-1.24453	5.02363	-7.07798	8.88e-05	0.0112407	1.83406	4.05159
MIR146A	-1.91414	-1.56027	-7.05633	9.08e-05	0.0114123	1.78532	4.04191
EIF4EBP2	-1.31284	6.32433	-7.04129	9.22e-05	0.0115095	1.76367	4.03527
DBNDD1	-1.38674	3.1332	-7.01765	9.45e-05	0.0116321	1.91397	4.02457
PEG10	1.45972	8.56063	7.01898	9.44e-05	0.0116321	1.70332	4.02503
LINC00341	-1.93751	0.658882	-6.98122	9.81e-05	0.0119943	1.80764	4.00833
SYAP1	-0.812838	6.53129	-6.97053	9.92e-05	0.0120461	1.69087	4.00349
NHSL2	-2.10757	3.62026	-6.96039	0.000100224	0.0120919	1.841	3.99903
RP11-328C8.4	3.47685	-2.56304	6.94138	0.000102209	0.0121702	0.90774	3.99051
SPRED1	-0.993567	6.92013	-6.94644	0.000101677	0.0121702	1.64473	3.99278
ANP32E	-1.7849	7.12793	-6.90623	0.000105996	0.0123784	1.5852	3.97471
NPC1L1	3.03899	-2.43802	6.91087	0.000105487	0.0123784	0.943152	3.9768
SEMA5B	-2.43146	0.18404	-6.91378	0.000105169	0.0123784	1.61361	3.97811
MANEAL	1.42122	4.82291	6.89803	0.000106901	0.0124045	1.77865	3.97102
NUMB	-0.892968	5.21664	-6.87543	0.000109441	0.0126189	1.65198	3.96082
ACER3	-1.03025	3.98396	-6.84099	0.000113439	0.0127299	1.69877	3.94524
CTD-2319I12.4	1.89042	0.2523	6.84475	0.000112995	0.0127299	1.51667	3.94694
GNPAT	-0.695852	6.6517	-6.84609	0.000112838	0.0127299	1.54815	3.94754
MT-ND5	1.58537	5.94058	6.84648	0.000112792	0.0127299	1.62796	3.94772
ZNF740	-0.777454	4.95479	-6.83714	0.000113897	0.0127299	1.60705	3.94349
CCNB1IP1	1.21592	7.06258	6.80492	0.000117802	0.012851	1.53316	3.92885
MASP2	3.19266	-4.24854	6.82149	0.000115775	0.012851	0.723088	3.93639
RAB15	-1.05853	2.64033	-6.81614	0.000116425	0.012851	1.69325	3.93395
UBE2L6	-0.749255	3.97859	-6.80776	0.000117451	0.012851	1.52689	3.93014
SLC16A9	0.996695	4.22801	6.76544	0.000122789	0.0133153	1.62588	3.91084
ACPP	-1.89937	-0.390816	-6.75255	0.000124468	0.0133385	1.61568	3.90494
CELSR3	0.932177	5.68505	6.75491	0.000124159	0.0133385	1.54012	3.90602
PRCD	-1.09814	5.34037	-6.70209	0.000131285	0.0138251	1.44396	3.88178
RBPJ	-1.36	6.28991	-6.70502	0.000130878	0.0138251	1.40271	3.88313
RMI1	-0.867713	4.53671	-6.70988	0.000130206	0.0138251	1.50368	3.88537
FAM114A1	-0.844158	4.43998	-6.69014	0.000132959	0.0139209	1.41112	3.87628
PDRG1	0.982722	5.04399	6.66939	0.000135922	0.0141498	1.48334	3.86671
PARP14	-0.78132	5.78415	-6.64858	0.000138967	0.0143847	1.31948	3.85709
LINC00693	2.50109	0.728698	6.62591	0.00014237	0.0145713	1.1702	3.84658
RRP1B	-0.769788	7.10102	-6.62716	0.00014218	0.0145713	1.30491	3.84716
NAB1	-0.933967	5.67133	-6.6197	0.000143318	0.0145864	1.33492	3.8437
VSTM2A	2.5653	2.38861	6.61436	0.000144139	0.0145885	1.29434	3.84122
PHTF1	-0.795284	5.84944	-6.60719	0.000145249	0.0146196	1.31938	3.83789
OAS3	-1.05129	5.15119	-6.60099	0.000146217	0.0146362	1.33765	3.835
CHST11	-0.987715	6.19222	-6.57309	0.00015066	0.0149985	1.27257	3.822
AES	-1.09684	6.7834	-6.56029	0.000152748	0.0151237	1.22845	3.81602
MRAP2	-1.80808	2.65328	-6.55287	0.000153973	0.0151626	1.43486	3.81256
PRKD3	-0.903326	6.97142	-6.53994	0.000156135	0.0152928	1.19689	3.8065
C10orf90	-2.23987	-1.25431	-6.51694	0.000160061	0.0155105	1.09339	3.79571
IL6ST	-0.840588	8.39986	-6.51989	0.000159551	0.0155105	1.11438	3.7971
AC010091.1	-1.80609	2.13265	-6.50435	0.000162255	0.0155577	1.24981	3.7898
AMOTL2	2.44642	4.19832	6.50603	0.000161961	0.0155577	1.2929	3.79059
APOE	-1.11148	2.70136	-6.48851	0.000165064	0.0157006	1.3041	3.78235
RP11-1084E5.1	-1.64827	-0.857522	-6.48625	0.00016547	0.0157006	1.34691	3.78128
CCSAP	-1.14833	5.11129	-6.47005	0.000168406	0.0158964	1.18582	3.77364
GNPDA1	0.856259	6.77473	6.45144	0.00017185	0.016138	1.13849	3.76485
PTEN	-0.642577	8.19574	-6.44329	0.000173383	0.0161984	1.03874	3.76099
CRTC3	1.05534	4.21546	6.41321	0.00017917	0.0166537	1.25178	3.74673
RP11-77H9.6	3.54054	-3.08738	6.40692	0.000180408	0.0166836	0.518447	3.74374
AC078842.3	-2.98688	-2.09987	-6.39441	0.000182896	0.0168077	0.997659	3.7378
ARFGAP2	0.65134	6.04263	6.38871	0.000184043	0.0168077	1.07517	3.73508
SLC35E1	0.668666	6.26168	6.38636	0.000184518	0.0168077	1.06618	3.73396
DLK2	-2.45045	-1.76952	-6.37622	0.000186581	0.0168207	0.992915	3.72913
KDM1A	-0.567547	7.85238	-6.37209	0.00018743	0.0168207	0.971776	3.72716
MIR1255B1	-1.90357	0.422957	-6.37946	0.000185919	0.0168207	1.22782	3.73068
ALDH1A3	-0.894682	4.01755	-6.34552	0.00019299	0.0171257	1.07313	3.71447
DCHS1	-0.89473	5.43713	-6.34669	0.000192741	0.0171257	1.02374	3.71503
SORCS1	-1.2311	5.16125	-6.34242	0.000193649	0.0171257	1.10177	3.71298
IRF2BPL	-1.1244	6.44393	-6.32722	0.000196924	0.0173312	0.974796	3.7057
ATL1	1.02654	4.37227	6.31101	0.000200482	0.0175595	1.16371	3.69792
C6orf48	1.33099	6.8318	6.29366	0.000204367	0.0175966	0.969033	3.68959
CAT	-0.922851	5.01551	-6.26656	0.000210608	0.0175966	0.950449	3.67653
IFT88	-0.915978	4.7563	-6.26649	0.000210624	0.0175966	0.974873	3.67649
IL15RA	-1.34897	-0.0736292	-6.26501	0.00021097	0.0175966	1.13179	3.67578
LRIG2	0.839399	5.17599	6.26846	0.000210164	0.0175966	1.01549	3.67744
NAT9	0.719215	6.1393	6.26341	0.000211345	0.0175966	0.913034	3.67501
NFE2L3	-1.24254	2.45288	-6.26262	0.00021153	0.0175966	0.949005	3.67463
RNF11	-0.855163	6.29796	-6.28904	0.000205418	0.0175966	0.923925	3.68736
TUFT1	2.24155	3.44709	6.29339	0.00020443	0.0175966	1.17232	3.68946
TYMP	-1.64579	0.328654	-6.28144	0.000207155	0.0175966	1.15374	3.6837
ZC3H7A	-0.641837	5.52272	-6.28566	0.00020619	0.0175966	0.97451	3.68573
LRP1B	1.33718	3.18202	6.24941	0.000214663	0.0177761	1.0453	3.66824
RP11-445F12.1	-2.50517	-2.17008	-6.2422	0.000216395	0.0178384	0.940928	3.66475
AMMECR1L	0.700615	6.00805	6.21987	0.000221851	0.0178836	0.877872	3.65394
CHSY1	-0.789899	7.33797	-6.23119	0.000219066	0.0178836	0.831407	3.65943
FAM163B	-2.74066	-0.186924	-6.2217	0.000221398	0.0178836	0.937145	3.65483
KIAA1549	-0.95878	5.53948	-6.23249	0.000218748	0.0178836	0.897784	3.66006
TCEA1	-0.823467	6.7891	-6.22489	0.000220613	0.0178836	0.837197	3.65637
FARP1	-1.00322	6.33739	-6.19858	0.000227196	0.0180745	0.847456	3.6436
SIGLEC15	-3.00202	-2.98294	-6.20155	0.000226442	0.0180745	0.892804	3.64504
STX2	-0.812075	5.85486	-6.19965	0.000226925	0.0180745	0.843358	3.64412
CACUL1	-0.593118	7.29857	-6.17465	0.000233374	0.0181801	0.76156	3.63195
FAM19A2	-1.67816	1.82006	-6.1767	0.000232838	0.0181801	1.02491	3.63295
MSH6	-0.839484	6.96903	-6.17412	0.000233513	0.0181801	0.753407	3.63169
SDCCAG8	-0.841165	5.17516	-6.1873	0.000230086	0.0181801	0.848544	3.63811
TMEM43	0.731553	6.3268	6.18418	0.000230892	0.0181801	0.828744	3.63659
ABTB2	1.65025	2.10181	6.16459	0.000236026	0.0182852	0.991367	3.62704
ARMC10	0.795004	6.20557	6.16141	0.000236871	0.0182852	0.793978	3.62549
CTC-205M6.5	-2.05318	-1.03851	-6.15205	0.000239378	0.0184008	0.909059	3.62092
IGDCC3	-3.68505	4.0307	-6.13868	0.000243011	0.0184649	0.91661	3.61437
IMPAD1	-0.711999	7.33669	-6.11952	0.00024832	0.0184649	0.6969	3.60499
NIPA1	0.753586	5.75393	6.13169	0.000244934	0.0184649	0.83178	3.61095
PRSS12	-1.09918	8.85485	-6.12151	0.000247763	0.0184649	0.619341	3.60596
PSG4	3.1427	-2.7614	6.14278	0.000241891	0.0184649	0.59333	3.61638
TCHH	2.34711	-3.17051	6.12499	0.000246791	0.0184649	0.579325	3.60767
THOP1	-0.782995	6.00506	-6.12204	0.000247616	0.0184649	0.756203	3.60622
URI1	-0.834064	6.73836	-6.12911	0.000245647	0.0184649	0.732893	3.60969
MT-ND4L	1.26441	5.9056	6.11272	0.000250237	0.0185318	0.76665	3.60165
CPEB1	2.34733	1.64142	6.09942	0.00025403	0.0187365	0.928261	3.59511
BNIP3L	-0.791954	6.74592	-6.09569	0.000255105	0.0187399	0.682223	3.59328
RP11-505K9.4	2.78939	-4.34426	6.09209	0.000256148	0.018741	0.221634	3.59151
RP11-267N12.1	-1.73545	1.68097	-6.08	0.000259681	0.0189235	0.940101	3.58556
CASP6	-0.738726	2.67067	-6.06654	0.00026368	0.0189871	0.738912	3.57892
ERBB2IP	-0.905509	6.95993	-6.06725	0.000263467	0.0189871	0.6357	3.57927
PRRG1	0.810117	4.46624	6.06776	0.000263313	0.0189871	0.846216	3.57953
HPGDS	-3.24181	-0.286344	-6.06252	0.000264886	0.0189983	0.922068	3.57694
HSPA1A	0.948672	7.1335	6.05909	0.000265922	0.0189983	0.641744	3.57525
HIST4H4	-1.49958	4.89219	-6.05465	0.000267267	0.0190198	0.754023	3.57305
CENPA	-1.42983	3.96816	-6.04036	0.000271651	0.0190603	0.779645	3.56599
MRPL20	-0.775067	6.38415	-6.0358	0.000273067	0.0190603	0.63357	3.56373
NARF	-1.11165	6.09152	-6.03765	0.000272493	0.0190603	0.633595	3.56464
RANBP6	-1.02241	5.57485	-6.04398	0.000270534	0.0190603	0.684108	3.56778
TTC26	-0.825573	4.28693	-6.04711	0.000269571	0.0190603	0.769957	3.56933
PGAP3	1.11586	3.30813	6.02489	0.000276486	0.0192252	0.858836	3.55833
KIAA1324	2.30682	0.39268	6.02116	0.000277668	0.019234	0.706903	3.55647
POM121	0.925281	4.71808	6.0169	0.000279019	0.0192545	0.774202	3.55437
HIST1H2AC	-1.197	6.67911	-6.00952	0.000281386	0.019301	0.586387	3.5507
RP11-13A1.3	-4.57732	-4.42173	-6.00819	0.000281813	0.019301	0.404126	3.55004
3-Mar	0.875777	3.89423	6.00005	0.000284448	0.0193521	0.776711	3.546
RAB31	-0.856402	4.82596	-5.99608	0.000285745	0.0193521	0.624953	3.54402
SVIL	-1.82638	6.46781	-5.99719	0.000285383	0.0193521	0.571582	3.54457
LINC00963	-0.725666	5.28937	-5.99184	0.000287136	0.0193742	0.634399	3.54191
ACSL3	-0.746697	7.82322	-5.98507	0.000289372	0.0193751	0.515191	3.53854
STK39	-0.714928	5.17478	-5.98216	0.00029034	0.0193751	0.619974	3.53709
TCEA3	-2.05138	0.964256	-5.98423	0.000289651	0.0193751	0.808601	3.53813
GBA	0.711174	5.69049	5.95818	0.000298446	0.0198434	0.595028	3.52513
HIST1H4I	-1.99264	5.39039	-5.94906	0.000301592	0.0199054	0.573571	3.52058
PTP4A3	-1.0975	5.03442	-5.95177	0.000300655	0.0199054	0.57792	3.52193
TAC1	-3.77457	0.266061	-5.946	0.000302656	0.0199054	0.732051	3.51905
GAB3	-1.79735	1.86241	-5.93651	0.000305983	0.0200518	0.719305	3.5143
FBXW7	-0.724542	6.03435	-5.9206	0.000311653	0.0203501	0.495221	3.50633
C11orf68	1.1763	4.2708	5.91348	0.000314227	0.020445	0.678012	3.50276
PRRG4	-1.62241	-0.937446	-5.89168	0.000322254	0.0206719	0.739335	3.4918
VTN	2.93578	0.847387	5.89814	0.000319852	0.0206719	0.650238	3.49505
ZNF132	0.988967	3.82337	5.89656	0.000320438	0.0206719	0.687682	3.49426
ZNF451	0.66946	7.10566	5.89255	0.000321928	0.0206719	0.44965	3.49224
DHFR	-1.33141	6.07054	-5.88481	0.000324828	0.0207273	0.453699	3.48835
UQCC1	0.691724	6.08622	5.88331	0.000325393	0.0207273	0.502549	3.48759
MADD	0.790232	5.97938	5.87335	0.000329176	0.0207523	0.480967	3.48257
PDLIM1	-1.53651	1.29092	-5.8703	0.000330342	0.0207523	0.714392	3.48104
RP11-269G24.4	-2.32675	0.261585	-5.87565	0.000328297	0.0207523	0.653586	3.48373
TMEM168	-0.814437	5.3075	-5.873	0.000329309	0.0207523	0.474981	3.4824
ACKR3	3.53575	-2.61961	5.85489	0.000336314	0.0210549	0.118925	3.47326
APOL3	-2.23797	-1.95947	-5.84514	0.000340151	0.0210941	0.632971	3.46833
C8orf46	4.79181	-2.77205	5.84732	0.000339288	0.0210941	0.168507	3.46943
FAM13B	0.645167	5.44866	5.82774	0.000347121	0.0210941	0.445202	3.45952
GABARAPL1	1.31016	3.02862	5.83056	0.000345981	0.0210941	0.671692	3.46095
RP11-436K8.1	-2.42099	-0.711199	-5.82715	0.000347361	0.0210941	0.57278	3.45922
S1PR3	1.05123	2.80854	5.82717	0.000347352	0.0210941	0.64599	3.45923
SF3B1	-0.545921	8.96307	-5.84188	0.000341446	0.0210941	0.295662	3.46668
SMG9	0.788497	4.79825	5.82753	0.000347204	0.0210941	0.516232	3.45942
UQCR10	0.791253	6.38014	5.83023	0.000346113	0.0210941	0.42243	3.46078
HNRNPA2B1	-0.937953	9.52005	-5.82163	0.000349603	0.0211597	0.246851	3.45642
LIMD2	-1.16223	5.82389	-5.81049	0.000354184	0.021366	0.37666	3.45077
BCAT1	-0.752206	9.39179	-5.80521	0.000356376	0.0213751	0.253125	3.44809
TPRG1L	1.12522	4.8158	5.80448	0.000356682	0.0213751	0.492643	3.44772
FAM111A	-0.926545	3.29909	-5.80157	0.0003579	0.0213778	0.363956	3.44624
DISP2	1.66807	2.14946	5.78842	0.000363452	0.0216357	0.605349	3.43955
TOLLIP	0.888478	4.9622	5.78575	0.000364593	0.0216357	0.429856	3.43819
DYNC1I2	-1.354	5.98767	-5.76533	0.000373434	0.0220169	0.296465	3.42779
STMN4	4.17626	0.251577	5.76806	0.00037224	0.0220169	0.106602	3.42918
TMEM134	1.43191	3.36861	5.75814	0.000376602	0.0221321	0.564421	3.42412
TARS2	0.660589	6.11326	5.75488	0.000378048	0.0221456	0.320075	3.42245
BCL11A	-0.816928	3.76707	-5.74495	0.000382494	0.0223342	0.457289	3.41738
ZRANB2	-0.563768	6.20914	-5.74096	0.000384298	0.0223679	0.275621	3.41533
VEPH1	-2.10228	-0.0511696	-5.73186	0.000388441	0.022537	0.551509	3.41068
SMC5	-0.648934	5.71509	-5.72414	0.000391994	0.022671	0.274873	3.40672
DBF4	-1.01405	5.65013	-5.71647	0.000395559	0.0228048	0.261053	3.40279
ATP8A1	-1.12745	6.31763	-5.68739	0.000409409	0.0233812	0.205009	3.38784
B3GNT5	-1.52955	3.80907	-5.69051	0.000407899	0.0233812	0.240524	3.38945
PRRX1	-1.38826	2.40886	-5.68948	0.000408399	0.0233812	0.180712	3.38892
GBP4	-0.768005	3.72525	-5.68106	0.000412492	0.0234251	0.191768	3.38458
MTR	-1.07095	6.95452	-5.68054	0.000412749	0.0234251	0.154425	3.38431
RNF4	0.90686	6.79841	5.67323	0.000416345	0.0235558	0.195207	3.38055
COL6A2	-0.945947	7.36413	-5.66755	0.000419162	0.0236418	0.0604826	3.37762
NR2E3	-4.14502	-3.85288	-5.65927	0.000423308	0.0237287	0.246883	3.37334
SH2D4A	1.18001	0.829374	5.66039	0.000422741	0.0237287	0.395822	3.37393
RP11-322E11.5	-2.67232	-3.38335	-5.65345	0.000426248	0.0238202	0.156004	3.37034
GPNMB	2.5904	1.47349	5.64755	0.000429249	0.0238416	0.467607	3.36729
RP11-1072C15.4	-1.43615	0.125765	-5.64759	0.000429231	0.0238416	0.453391	3.36731
NFU1	-1.12501	3.33395	-5.63544	0.000435487	0.0241146	0.351923	3.36102
CDIPT	0.597897	6.17436	5.62985	0.000438404	0.024174	0.176985	3.35813
SLC5A3	-1.3129	5.90141	-5.6283	0.000439215	0.024174	0.126188	3.35732
HSDL2	-0.748756	5.31957	-5.61118	0.000448285	0.0245251	0.146704	3.34845
RAD21	-0.703207	7.79972	-5.61297	0.000447328	0.0245251	0.0523954	3.34937
HIST1H3H	-1.58717	6.31618	-5.6047	0.000451774	0.024642	0.0969709	3.34508
CCDC34	-1.23548	3.82496	-5.6017	0.000453396	0.0246566	0.229563	3.34352
MAP6	2.54777	2.33477	5.59546	0.000456797	0.0246941	0.33426	3.34028
PPM1L	1.08421	4.61094	5.59618	0.000456403	0.0246941	0.348406	3.34065
LIFR	-1.23306	7.53999	-5.58933	0.000460162	0.0248025	0.00855941	3.33709
CDC25C	-0.989894	3.00449	-5.58079	0.000464899	0.0249211	0.327994	3.33264
ELAVL4	-1.0803	6.17774	-5.57798	0.000466466	0.0249211	0.0856708	3.33118
MOCS2	-0.999272	4.96452	-5.57873	0.000466048	0.0249211	0.126535	3.33157
PIGA	-0.812648	4.55181	-5.57277	0.000469398	0.0250043	0.184458	3.32846
CYGB	-1.46524	7.50497	-5.56048	0.00047638	0.0250106	-0.00338364	3.32205
IL4I1	2.36381	-2.45057	5.56092	0.000476127	0.0250106	0.0154145	3.32228
KCNQ5	1.58567	3.3575	5.56391	0.000474415	0.0250106	0.341171	3.32384
SLC39A14	-0.546817	7.60102	-5.56564	0.00047343	0.0250106	0.0112916	3.32474
TNFAIP8	-1.19332	1.86928	-5.56531	0.000473618	0.0250106	0.309815	3.32457
ARL13B	-0.711769	4.4349	-5.55219	0.000481152	0.0250446	0.151474	3.31772
DPH6	-1.12512	2.89649	-5.55594	0.000478984	0.0250446	0.321142	3.31968
FBXL19	-0.73478	5.55742	-5.55319	0.000480572	0.0250446	0.0510749	3.31824
RAP1A	-1.26363	4.64442	-5.53894	0.000488893	0.0253268	0.112409	3.31079
RGS13	-2.25878	3.37398	-5.53816	0.000489353	0.0253268	0.0264181	3.31038
LPCAT1	0.867613	6.7174	5.53057	0.000493852	0.0253838	0.0363856	3.3064
SECTM1	-1.30361	0.507431	-5.52925	0.000494635	0.0253838	0.287919	3.30572
VASH1	-1.4038	5.68147	-5.53231	0.000492812	0.0253838	0.0483709	3.30732
MKI67	-1.28606	6.63378	-5.52351	0.000498076	0.0254172	-0.0219673	3.3027
ST6GALNAC5	2.30268	1.64247	5.52534	0.000496977	0.0254172	0.290496	3.30366
PABPC4	-0.855136	7.07701	-5.51882	0.000500903	0.0254901	-0.0336468	3.30025
SMCO3	2.80756	-3.06881	5.51359	0.000504081	0.0255093	0.0113998	3.2975
TINCR	4.09773	-2.99658	5.51394	0.000503866	0.0255093	-0.135219	3.29768
PTGES	1.81497	3.16559	5.50646	0.000508444	0.0256588	0.259121	3.29376
LRIG1	-1.32858	2.97156	-5.49092	0.000518101	0.0259306	0.0724091	3.28559
RABL6	-0.726009	6.50883	-5.49309	0.000516738	0.0259306	-0.03789	3.28673
RP11-423O2.5	0.955791	2.80731	5.49103	0.00051803	0.0259306	0.22487	3.28565
ARMCX6	0.677503	4.64346	5.48557	0.00052147	0.0260197	0.0967876	3.28277
HSPB7	2.66246	-0.529991	5.48349	0.000522787	0.0260197	0.146251	3.28168
SLC6A12	3.44627	-2.91285	5.48132	0.000524165	0.0260197	-0.171153	3.28053
ARNT2	2.38314	2.39813	5.47904	0.00052562	0.026021	0.275764	3.27933
BAI1	-1.5342	2.79549	-5.47281	0.000529606	0.0261215	0.209328	3.27605
BCS1L	0.684695	5.73315	5.4714	0.000530516	0.0261215	0.00629842	3.2753
PPFIA2	2.48814	-1.56836	5.46877	0.000532208	0.0261341	0.118069	3.27392
ADAMTS3	-0.89683	4.94914	-5.46125	0.000537095	0.0262262	0.0409023	3.26995
CORO6	-1.28456	1.45875	-5.45774	0.000539393	0.0262262	0.250251	3.26809
HIST1H3C	-1.81497	6.50933	-5.45051	0.00054416	0.0262262	-0.118623	3.26427
INPP5A	0.733873	5.00894	5.45386	0.000541945	0.0262262	0.0256863	3.26604
JKAMP	0.545013	6.39469	5.45593	0.000540581	0.0262262	-0.0614473	3.26714
RP11-661A12.5	-1.98673	-2.84134	-5.45101	0.00054383	0.0262262	0.178981	3.26454
TSTA3	-0.585686	6.11206	-5.45859	0.00053884	0.0262262	-0.0836693	3.26854
AC074138.3	1.45955	0.664726	5.4376	0.000552784	0.0264516	0.202159	3.25744
CTD-2162K18.5	1.24495	2.30669	5.42855	0.000558917	0.0264516	0.216401	3.25265
CTD-2587M2.1	2.70165	-2.45969	5.4412	0.000550365	0.0264516	-0.163334	3.25935
FAM171A1	-1.21576	5.16184	-5.43062	0.000557513	0.0264516	-0.0964836	3.25375
LINC00639	-4.37584	0.31097	-5.42417	0.000561916	0.0264516	0.123468	3.25033
PLSCR1	-1.20695	1.20041	-5.42437	0.000561778	0.0264516	0.179432	3.25044
PTN	-1.01646	8.20021	-5.43574	0.000554042	0.0264516	-0.193073	3.25646
TBC1D3F	1.43848	1.17322	5.42688	0.00056006	0.0264516	0.215539	3.25177
WNT6	-2.32576	-0.408132	-5.42397	0.000562054	0.0264516	0.145205	3.25022
ZBTB49	0.850866	3.15825	5.42207	0.000563357	0.0264516	0.13785	3.24922
HTATIP2	-0.886601	4.66521	-5.41576	0.000567715	0.0264888	-0.0747197	3.24587
RIF1	-0.673688	7.5236	-5.41462	0.00056851	0.0264888	-0.20182	3.24526
TRIM58	3.29054	-2.57476	5.41817	0.00056605	0.0264888	-0.241716	3.24715
HEATR5B	0.607273	5.82776	5.41231	0.000570117	0.0264959	-0.0912886	3.24404
MPDZ	0.764881	6.40033	5.4029	0.000576716	0.026599	-0.117905	3.23904
RP11-286B14.1	-2.02499	0.787288	-5.40587	0.000574625	0.026599	0.160501	3.24062
SRPX	-0.608527	3.8675	-5.40465	0.000575486	0.026599	-0.157229	3.23997
CTD-2531D15.4	2.4728	-2.63582	5.39489	0.000582399	0.0267476	-0.17631	3.23478
GATA2	-1.62769	7.11785	-5.39217	0.000584342	0.0267476	-0.179227	3.23333
TMEM194A	-0.807861	5.27337	-5.39328	0.000583551	0.0267476	-0.104694	3.23392
CARKD	0.58209	6.05506	5.38986	0.000586001	0.0267563	-0.127268	3.2321
DDC	-2.37114	5.97687	-5.38078	0.000592558	0.0269207	-0.128308	3.22727
GINM1	-0.793666	4.48088	-5.38191	0.000591737	0.0269207	-0.059396	3.22787
FAM222A	-1.15445	6.20926	-5.37509	0.000596716	0.0269751	-0.163811	3.22423
HIST1H2BN	-1.54887	5.54971	-5.37535	0.000596521	0.0269751	-0.149666	3.22437
DHRS11	1.09564	3.47568	5.36414	0.000604792	0.0270009	0.0405185	3.21839
ISYNA1	-0.995571	5.31906	-5.36495	0.000604191	0.0270009	-0.172028	3.21883
MIR22HG	0.839505	3.44779	5.36636	0.000603145	0.0270009	0.0849886	3.21958
MPHOSPH9	-0.960657	6.5691	-5.36805	0.000601894	0.0270009	-0.212788	3.22048
PPP1R3F	-0.676569	3.73029	-5.36385	0.000605011	0.0270009	-0.0581158	3.21824
TET2	-0.645313	5.52578	-5.36228	0.000606178	0.0270009	-0.17124	3.2174
AKR7A2	0.724984	5.33679	5.35445	0.000612041	0.0270428	-0.137875	3.21322
ARHGAP6	-3.08536	-0.459742	-5.35683	0.000610253	0.0270428	0.129423	3.21449
GPRC5B	2.11468	1.44179	5.35768	0.000609618	0.0270428	0.134371	3.21494
SNHG7	0.647857	6.94056	5.35311	0.000613056	0.0270428	-0.210603	3.2125
PPIP5K2	-0.541976	6.84041	-5.34874	0.000616359	0.0271228	-0.250195	3.21017
ST3GAL6	-1.51149	5.67708	-5.34397	0.000619995	0.027217	-0.201159	3.20761
SIMC1	-0.708362	3.4037	-5.33172	0.000629428	0.0275647	-0.0541691	3.20105
GAP43	-2.91385	4.60471	-5.32897	0.000631563	0.0275919	-0.0201029	3.19958
KLHL21	0.837251	4.98385	5.3218	0.000637179	0.0277706	-0.114287	3.19574
MATN2	1.94785	1.2538	5.31483	0.000642694	0.0279441	0.0617458	3.192
CLDN2	-2.21943	-3.16666	-5.31025	0.000646343	0.0280359	0.00435463	3.18954
NBPF20	0.625167	5.6802	5.30783	0.00064828	0.0280531	-0.247686	3.18824
HAUS6	-1.17899	6.12253	-5.30445	0.000650998	0.028104	-0.276819	3.18642
FAM214B	0.81228	4.56473	5.2989	0.000655483	0.0281405	-0.110696	3.18344
KIF14	-1.15697	6.32894	-5.29768	0.000656477	0.0281405	-0.305802	3.18278
VSIG10L	1.80599	-0.0664623	5.29973	0.000654813	0.0281405	0.0214589	3.18388
MTMR4	-0.477525	7.03549	-5.28733	0.00066495	0.0282379	-0.345955	3.17721
OXCT2	1.61031	-1.51959	5.28926	0.000663358	0.0282379	-0.0559308	3.17825
RP11-513G11.3	-2.69252	-0.0890294	-5.28821	0.000664218	0.0282379	-0.00813251	3.17769
SPNS2	2.75431	-2.69327	5.29029	0.000662513	0.0282379	-0.398368	3.17881
TLR1	-2.09805	-0.948227	-5.2852	0.000666706	0.0282466	0.052148	3.17607
RPL39L	-0.875692	3.7505	-5.28145	0.000669813	0.0283124	-0.146321	3.17405
SMC4	-1.73439	7.47695	-5.27617	0.000674218	0.0283684	-0.379165	3.1712
TAB2	-0.700136	5.20134	-5.27613	0.000674252	0.0283684	-0.227206	3.17118
ACRC	1.43533	0.783813	5.27044	0.00067903	0.0284826	0.0315662	3.16811
PLEKHA6	-0.981474	5.50182	-5.26918	0.000680093	0.0284826	-0.263682	3.16743
ITGB1	-1.33353	9.74149	-5.26272	0.000685573	0.0286463	-0.496069	3.16395
DDX17	-0.472523	8.39469	-5.25799	0.000689622	0.0286839	-0.413643	3.16139
PURB	0.766571	7.47492	5.25646	0.000690932	0.0286839	-0.380569	3.16056
SOCS3	-0.892127	4.24791	-5.25616	0.000691197	0.0286839	-0.351168	3.1604
TMEM229A	-1.82232	4.3133	-5.2493	0.000697116	0.0288638	-0.264761	3.15669
MATR3	-0.458887	9.52641	-5.24252	0.000703035	0.0290429	-0.490146	3.15302
DICER1	-1.24743	6.96311	-5.24069	0.000704639	0.0290432	-0.388249	3.15203
BHLHA15	-1.93727	-2.69915	-5.23501	0.000709644	0.0291178	-0.124322	3.14896
CKB	-1.24089	6.67186	-5.236	0.000708768	0.0291178	-0.356359	3.1495
FBXL3	-0.544688	5.78837	-5.23267	0.000711723	0.0291374	-0.353089	3.14769
BLMH	-0.864971	5.35427	-5.22775	0.000716103	0.029237	-0.332477	3.14502
PCBP1-AS1	1.04225	3.3755	5.22634	0.000717365	0.029237	-0.0952691	3.14426
C1GALT1	-1.42736	5.4989	-5.22263	0.000720696	0.0293072	-0.387056	3.14225
RNF38	0.928515	5.01914	5.20982	0.000732321	0.0296476	-0.261882	3.1353
THBD	-2.92198	-2.92387	-5.20993	0.000732223	0.0296476	-0.092605	3.13536
RHOF	-1.242	2.18955	-5.2054	0.000736383	0.0297459	-0.0912481	3.1329
BUB3	-0.679631	7.29134	-5.20125	0.000740215	0.0298346	-0.459718	3.13064
RELB	-0.721488	3.20485	-5.19318	0.000747738	0.0300713	-0.278099	3.12625
RP1-74M1.3	-2.09151	-0.972726	-5.18994	0.000750782	0.0301272	-0.0757952	3.12449
PLEKHB2	0.818981	7.84137	5.18815	0.000752465	0.0301284	-0.490709	3.12351
MOSPD1	1.15447	4.33712	5.18475	0.000755682	0.0301908	-0.198152	3.12166
ITGA8	-1.60074	3.28172	-5.18154	0.000758729	0.0302462	-0.399815	3.11991
ADPGK	0.531978	6.23278	5.17757	0.000762522	0.030265	-0.428629	3.11775
NUDT16	-1.01	5.29184	-5.17901	0.000761147	0.030265	-0.393293	3.11853
UTP14C	-0.966686	5.03626	-5.17108	0.000768762	0.0304463	-0.386302	3.11421
TFAM	-1.01212	6.43695	-5.16567	0.000774006	0.0305875	-0.475986	3.11126
ACTR3	-0.64864	7.38595	-5.16389	0.00077574	0.0305897	-0.518727	3.11028
NACC2	-1.65831	1.97823	-5.14886	0.000790545	0.0310972	-0.15273	3.10207
PRKCSH	0.531174	7.8284	5.14738	0.000792025	0.0310972	-0.544805	3.10126
PABPN1	-0.70253	5.05909	-5.14511	0.000794295	0.0311193	-0.419709	3.10002
ALDOC	-1.1807	4.69846	-5.13495	0.000804533	0.0314528	-0.372268	3.09446
MT-ND2	0.714951	6.35916	5.12939	0.000810195	0.0316063	-0.503975	3.09141
SMARCA1	-0.912651	6.35152	-5.12735	0.000812284	0.0316201	-0.537612	3.09029
ASB5	3.39102	-2.83055	5.1238	0.00081593	0.0316943	-0.39798	3.08835
PPP1R15B	-0.574967	7.8596	-5.11952	0.000820348	0.0317306	-0.59297	3.086
SYP	1.03573	5.08952	5.12029	0.000819551	0.0317306	-0.242592	3.08642
DIRC3	2.01523	1.09398	5.11487	0.000825188	0.0318502	-0.152633	3.08345
ULBP2	3.02399	-2.97985	5.11307	0.000827066	0.0318551	-0.540123	3.08246
CA9	-2.06203	-2.39132	-5.10271	0.000837979	0.0321922	-0.302564	3.07677
KIAA1586	-0.573139	5.28315	-5.10142	0.00083935	0.0321922	-0.480932	3.07606
C9orf43	1.86693	1.05906	5.09729	0.000843749	0.0322929	-0.17688	3.07379
COL22A1	-2.21313	2.25408	-5.09251	0.000848878	0.0323521	-0.18129	3.07115
HDAC1	-0.797882	5.75435	-5.09105	0.000850449	0.0323521	-0.552686	3.07035
HIST2H4A	-1.22618	7.01877	-5.09089	0.000850624	0.0323521	-0.610653	3.07026
CAMK2G	0.81526	5.51318	5.08343	0.000858702	0.0325236	-0.509987	3.06616
ZFP2	2.18293	-0.311808	5.08359	0.000858526	0.0325236	-0.265109	3.06625
AP3B2	1.02131	3.39546	5.0741	0.000868929	0.0326602	-0.246331	3.06102
DAP	-0.561911	6.23869	-5.07638	0.000866421	0.0326602	-0.581364	3.06227
SH3TC2	-3.23215	2.70043	-5.0736	0.000869481	0.0326602	-0.328174	3.06074
ZNF200	-0.670313	4.6505	-5.07634	0.000866468	0.0326602	-0.498436	3.06225
LOXL2	-0.64602	4.65	-5.06276	0.000881546	0.0329811	-0.631069	3.05475
SREBF2	-0.51763	6.63135	-5.06115	0.000883348	0.0329811	-0.591522	3.05387
TCEAL3	-0.803327	3.22817	-5.06106	0.000883456	0.0329811	-0.35985	3.05382
CDK4	-0.45582	8.0805	-5.04992	0.000896064	0.0332969	-0.690156	3.04766
EPB41L4A-AS1	0.699652	5.27073	5.04957	0.000896466	0.0332969	-0.488949	3.04747
HIST1H3A	-1.81935	5.19116	-5.04875	0.000897398	0.0332969	-0.56049	3.04701
CD82	-1.26406	0.943998	-5.04263	0.000904423	0.0334214	-0.288937	3.04363
SLC38A1	0.651536	9.13476	5.04288	0.000904139	0.0334214	-0.725728	3.04376
PCDH11X	-1.31011	-0.706597	-5.0393	0.000908276	0.0334637	-0.270177	3.04178
PPIG	-0.51564	6.46777	-5.03847	0.00090924	0.0334637	-0.651522	3.04132
CYR61	2.86819	2.95876	5.02524	0.000924718	0.0339647	-0.430839	3.03399
CKAP2	-0.565786	6.85302	-5.0199	0.000931038	0.0340595	-0.669871	3.03103
NTSR1	-2.55111	0.714628	-5.02088	0.000929872	0.0340595	-0.359171	3.03158
TRIM9	0.671244	6.1437	5.01775	0.000933605	0.034085	-0.599536	3.02984
C7orf60	-0.623017	4.07184	-5.01171	0.000940845	0.034174	-0.527219	3.02648
CTBP2	-0.639965	6.55726	-5.01026	0.000942581	0.034174	-0.685363	3.02568
TNFSF18	2.9443	-2.00213	5.01212	0.00094035	0.034174	-0.368944	3.02671
UBA7	-1.49903	1.68594	-5.00946	0.000943547	0.034174	-0.453547	3.02524
ISG15	-0.919669	1.53053	-4.99687	0.000958875	0.0345916	-0.342651	3.01824
TMEM176A	-1.88457	0.682459	-4.99809	0.00095738	0.0345916	-0.504982	3.01892
COX19	0.636632	4.56631	4.99425	0.000962104	0.0346396	-0.545932	3.01678
SAMD9	-0.740171	3.28844	-4.98833	0.000969438	0.0347662	-0.668439	3.01348
SMPDL3A	1.2202	1.32797	4.98842	0.000969317	0.0347662	-0.302074	3.01353
RAB30	0.947414	3.9923	4.98474	0.000973904	0.0348577	-0.368993	3.01148
N4BP2L2	-0.507665	6.50546	-4.98134	0.000978167	0.0349417	-0.709837	3.00959
ALG5	0.792452	5.97038	4.96924	0.000993482	0.0354193	-0.648594	3.00284
BCL3	-1.17786	2.2423	-4.96758	0.000995606	0.0354257	-0.432697	3.00191
GPN2	0.538091	5.32567	4.96189	0.00100291	0.0356162	-0.687798	2.99874
SRSF10	-0.465317	7.19476	-4.95791	0.00100806	0.0356556	-0.7816	2.99651
TMEM163	-1.63615	-2.56091	-4.95735	0.00100878	0.0356556	-0.391635	2.9962
TMEM9	0.86479	6.60925	4.95649	0.0010099	0.0356556	-0.735557	2.99572
PDAP1	-0.753477	7.32921	-4.95318	0.00101421	0.0357386	-0.79381	2.99387
HMGXB4	-0.638723	5.48157	-4.9412	0.00102999	0.0360852	-0.724863	2.98717
NRBP1	0.559207	7.14846	4.94187	0.0010291	0.0360852	-0.786869	2.98754
PPFIA4	-1.08771	1.78251	-4.94266	0.00102805	0.0360852	-0.390024	2.98799
ATP11C	-1.76638	7.02629	-4.93914	0.00103272	0.0361114	-0.825035	2.98602
LRRCC1	-1.35944	2.02575	-4.93422	0.00103929	0.0362023	-0.638419	2.98326
TH	-1.80822	1.20959	-4.93502	0.00103823	0.0362023	-0.363407	2.98371
GCC2	-0.516542	5.41866	-4.9245	0.00105242	0.0364505	-0.766758	2.97781
ITGA2	-2.11992	5.0451	-4.92745	0.00104842	0.0364505	-0.862068	2.97946
PPP6C	0.479576	6.94595	4.92492	0.00105185	0.0364505	-0.79374	2.97805
C2orf66	3.8425	-3.03109	4.91748	0.00106201	0.0364629	-0.660661	2.97387
CCDC64	2.63317	3.45746	4.91504	0.00106536	0.0364629	-0.397977	2.9725
CDH6	3.12842	1.93907	4.9139	0.00106693	0.0364629	-0.387272	2.97186
HIST1H2BB	-1.8258	5.52386	-4.91255	0.00106879	0.0364629	-0.798827	2.97111
KIF21B	-2.71274	-0.507967	-4.91259	0.00106875	0.0364629	-0.38776	2.97113
LCTL	-2.35929	-3.31849	-4.9179	0.00106142	0.0364629	-0.44343	2.97411
PDPK1	0.53594	6.12216	4.91368	0.00106724	0.0364629	-0.763951	2.97174
RP11-742D12.2	-2.80456	-4.20674	-4.91471	0.00106581	0.0364629	-0.513115	2.97232
IFI35	-1.15306	1.95743	-4.90948	0.00107304	0.0364714	-0.612102	2.96938
RP11-427M20.1	3.43668	-2.5119	4.9103	0.00107192	0.0364714	-0.62819	2.96984
POP4	0.517193	5.39104	4.90679	0.00107679	0.0365305	-0.724213	2.96787
ARF4	1.23631	7.00578	4.90501	0.00107927	0.0365468	-0.801661	2.96687
ONECUT2	1.52169	2.08591	4.89783	0.00108936	0.0365768	-0.408174	2.96283
PSMB9	-1.3741	0.732543	-4.89868	0.00108815	0.0365768	-0.588911	2.96331
RP11-89M16.1	3.1048	-3.52487	4.90013	0.00108611	0.0365768	-0.728852	2.96413
RP13-463N16.6	-3.28754	-1.27232	-4.89723	0.0010902	0.0365768	-0.414483	2.96249
SLC38A7	0.721848	4.19099	4.89847	0.00108845	0.0365768	-0.616189	2.96319
HIST1H1C	-1.2196	7.82037	-4.88766	0.0011038	0.0368972	-0.918095	2.95711
MAP4K3	0.625764	6.01189	4.88776	0.00110366	0.0368972	-0.792062	2.95716
AGAP6	0.753229	3.53309	4.87675	0.00111954	0.0372795	-0.594048	2.95096
FBXL16	-1.2688	1.66908	-4.87549	0.00112137	0.0372795	-0.437731	2.95025
KLF6	-1.22387	6.00189	-4.87609	0.0011205	0.0372795	-0.842236	2.95059
RP11-171I2.5	2.03204	-1.89638	4.87008	0.00112928	0.037474	-0.553328	2.9472
RAB8A	-0.838165	5.59544	-4.86696	0.00113387	0.0375579	-0.834137	2.94544
IFNAR2	-0.691242	3.76533	-4.8652	0.00113646	0.0375755	-0.693801	2.94444
SLIT2	2.09422	3.33409	4.85902	0.00114563	0.0378099	-0.58715	2.94096
CASP8	-0.853752	3.47469	-4.85191	0.00115628	0.0380262	-0.815839	2.93694
CCDC50	-1.12975	5.99756	-4.84496	0.0011668	0.0380262	-0.898589	2.93301
FBLN1	-1.12911	3.7067	-4.84944	0.00116001	0.0380262	-0.71545	2.93554
FBXO45	-0.731642	6.79859	-4.84697	0.00116374	0.0380262	-0.915881	2.93414
NBPF11	0.710946	4.26231	4.84737	0.00116314	0.0380262	-0.730068	2.93437
PHIP	-0.63437	6.92766	-4.84527	0.00116632	0.0380262	-0.921962	2.93318
TMEM115	0.596657	5.20904	4.84602	0.00116519	0.0380262	-0.749458	2.9336
GAREML	-1.31095	2.66049	-4.83426	0.00118318	0.0384137	-0.556786	2.92695
LCORL	-0.617227	5.46658	-4.83477	0.0011824	0.0384137	-0.860652	2.92723
NEB	1.95809	-1.57977	4.83308	0.00118501	0.0384137	-0.568261	2.92628
FUOM	-0.985011	2.8831	-4.83005	0.0011897	0.0384792	-0.591072	2.92456
PIR	-1.26697	4.89594	-4.82905	0.00119125	0.0384792	-0.873735	2.924
RP11-126O1.5	3.13558	-4.12252	4.82764	0.00119345	0.0384819	-0.795633	2.9232
PDZK1	3.00334	-3.86754	4.82526	0.00119716	0.0385334	-0.801523	2.92185
FAM89A	-0.942331	5.39821	-4.82209	0.00120214	0.0386253	-0.915802	2.92005
SLC9A6	0.58603	5.41055	4.81438	0.00121431	0.0389476	-0.849374	2.91567
ADI1	0.790601	5.9475	4.81065	0.00122025	0.0390427	-0.904724	2.91355
ALKBH8	-0.98474	3.66739	-4.79918	0.0012387	0.0390427	-0.676663	2.90703
APBB1	-0.579379	4.86178	-4.80258	0.00123319	0.0390427	-0.838077	2.90897
CASP8AP2	-0.71325	6.00235	-4.80745	0.00122537	0.0390427	-0.946696	2.91173
HIST1H3E	-1.19763	2.68876	-4.80181	0.00123445	0.0390427	-0.60285	2.90853
MEX3C	-0.466877	6.66951	-4.80488	0.00122948	0.0390427	-0.982269	2.91028
OPHN1	0.951127	2.15223	4.8	0.00123736	0.0390427	-0.645522	2.9075
PDE4C	3.55341	-1.6141	4.79919	0.00123868	0.0390427	-0.788994	2.90704
TAGLN	1.58701	0.427785	4.7992	0.00123867	0.0390427	-0.547774	2.90705
TNFAIP8L1	-1.80135	3.19451	-4.80024	0.00123698	0.0390427	-0.751714	2.90764
CTIF	0.66005	5.10339	4.79478	0.00124586	0.0391394	-0.860017	2.90453
INO80C	-1.24943	3.61402	-4.79438	0.00124651	0.0391394	-0.780706	2.9043
RAB11FIP1	-0.73774	3.86895	-4.79334	0.00124822	0.0391394	-0.81597	2.90371
GADD45G	1.56974	1.40596	4.78909	0.00125518	0.0392903	-0.537645	2.90129
DUT	-0.560335	6.52285	-4.7873	0.00125813	0.0393151	-0.977894	2.90027
HIST2H2AB	-1.3606	5.47275	-4.78152	0.00126771	0.0395464	-0.959805	2.89698
FAM73B	0.816073	4.73924	4.77756	0.00127431	0.0396843	-0.811515	2.89473
FKBP3	-0.563509	6.43099	-4.7736	0.00128096	0.0398235	-0.99586	2.89246
ZNF44	0.861753	3.38639	4.77066	0.0012859	0.039909	-0.669096	2.89079
CTD-3060P21.1	-1.6302	-2.621	-4.75854	0.00130656	0.0399377	-0.631121	2.88387
DAPK3	0.77436	5.39284	4.75894	0.00130587	0.0399377	-0.906935	2.8841
FAM69B	-2.1767	1.73106	-4.76386	0.00129745	0.0399377	-0.56766	2.88691
HIST2H2AC	-1.47018	6.50615	-4.7671	0.00129193	0.0399377	-1.02891	2.88876
HIST2H4B	-1.21018	7.62006	-4.76686	0.00129235	0.0399377	-1.08117	2.88862
PLEK2	-2.3621	-0.0760214	-4.76011	0.00130388	0.0399377	-0.594927	2.88476
PRKRIR	-1.22899	6.09481	-4.76262	0.00129957	0.0399377	-0.977227	2.8862
RP11-13A1.1	-3.6667	-0.468088	-4.75988	0.00130427	0.0399377	-0.572351	2.88463
TMEM19	-1.02632	4.54974	-4.76002	0.00130402	0.0399377	-0.883086	2.88472
VASP	-1.27858	5.26	-4.757	0.00130921	0.0399519	-0.966648	2.88299
CHM	-0.686698	5.2909	-4.75572	0.00131142	0.0399523	-0.967576	2.88226
AQP1	2.41907	1.34246	4.75324	0.00131571	0.040016	-0.581642	2.88084
DDAH1	-0.911451	5.83683	-4.75032	0.00132078	0.0401031	-1.01359	2.87917
CDC42BPA	-0.662744	6.93799	-4.74886	0.00132331	0.0401132	-1.06522	2.87834
CLCC1	-0.553076	5.80428	-4.74103	0.00133703	0.040268	-1.01279	2.87386
NEGR1	1.41325	2.90696	4.7424	0.00133462	0.040268	-0.724954	2.87464
WIPF1	-1.33079	4.07901	-4.74091	0.00133726	0.040268	-0.974468	2.87379
ZHX1	-1.60608	6.14293	-4.7436	0.00133252	0.040268	-1.03993	2.87533
AMN1	-0.814568	3.26744	-4.73492	0.00134785	0.0403867	-0.770509	2.87036
CYB561A3	0.715431	5.36315	4.73533	0.00134712	0.0403867	-0.992336	2.87059
SSBP4	-0.597076	5.42317	-4.73723	0.00134376	0.0403867	-0.974008	2.87168
WNT2B	1.56225	0.509667	4.73317	0.00135097	0.0404136	-0.605081	2.86936
DGKG	-1.26938	3.53056	-4.73061	0.00135554	0.0404839	-0.760789	2.86789
ETV6	-0.809704	4.12023	-4.72807	0.00136008	0.0405343	-0.923263	2.86644
TXNDC9	-0.499715	5.49189	-4.72719	0.00136167	0.0405343	-1.03142	2.86593
GNAO1	1.84698	3.41399	4.7204	0.00137394	0.040568	-0.633524	2.86203
LIN9	-0.647511	4.38195	-4.72061	0.00137356	0.040568	-0.936305	2.86215
MANBA	0.788086	4.72435	4.72329	0.00136871	0.040568	-0.93732	2.86369
PSIP1	-0.849547	6.48295	-4.72255	0.00137004	0.040568	-1.05429	2.86327
RP11-402L6.1	-2.45118	2.98135	-4.72425	0.00136696	0.040568	-0.796264	2.86425
SNX19	0.480501	6.28424	4.71661	0.00138083	0.0407056	-1.0311	2.85986
FAM132B	-1.42057	-1.0001	-4.71351	0.00138649	0.0408064	-0.631208	2.85808
PTPRC	-0.9153	3.7046	-4.71129	0.00139057	0.0408325	-1.15756	2.85681
TUBE1	0.744782	3.87507	4.71059	0.00139186	0.0408325	-0.772179	2.8564
HIST1H3J	-1.86804	5.49236	-4.69789	0.00141546	0.0413361	-1.079	2.8491
MT-ND1	1.07414	6.33637	4.69679	0.00141752	0.0413361	-1.05374	2.84847
PCCA	0.618236	4.69013	4.69648	0.00141811	0.0413361	-0.931691	2.84829
XRN2	-0.413053	8.0145	-4.6972	0.00141675	0.0413361	-1.17017	2.84871
C5orf24	-0.576646	5.75408	-4.69299	0.00142468	0.0414124	-1.06673	2.84628
HIST1H1E	-1.15298	8.02668	-4.69147	0.00142754	0.0414124	-1.19545	2.84541
TIMM17A	0.631774	6.49966	4.69197	0.0014266	0.0414124	-1.08346	2.8457
EGFLAM	-1.04866	3.10724	-4.68748	0.00143511	0.0415656	-0.802134	2.84312
KCTD5	0.587811	6.17852	4.68613	0.00143768	0.0415741	-1.09063	2.84234
BAK1	0.725037	5.75475	4.68094	0.00144761	0.0416128	-1.05889	2.83935
GMIP	-0.836107	2.48938	-4.68066	0.00144816	0.0416128	-0.778605	2.83918
HIST1H3D	-1.58119	6.16348	-4.68213	0.00144534	0.0416128	-1.12044	2.84003
XYLT2	-0.58528	5.07408	-4.68282	0.00144402	0.0416128	-1.09489	2.84043
AGAP4	0.976207	3.07125	4.67385	0.00146131	0.0417629	-0.782158	2.83526
NBPF24	0.639248	3.8766	4.67085	0.00146714	0.0417629	-0.932533	2.83353
PRPF4B	-0.550895	6.51428	-4.67337	0.00146223	0.0417629	-1.14297	2.83498
SPRYD3	0.82892	4.12124	4.67311	0.00146275	0.0417629	-0.847644	2.83483
STAC	1.47562	5.55966	4.67146	0.00146594	0.0417629	-0.958451	2.83388
SULT1B1	-2.22611	-0.954622	-4.67253	0.00146387	0.0417629	-0.749855	2.8345
ARHGAP28	-1.08089	3.56861	-4.6686	0.00147152	0.0418224	-0.935823	2.83223
AVPI1	1.37118	2.65363	4.66691	0.00147484	0.0418516	-0.748282	2.83125
AC144831.1	2.7773	-0.668878	4.66329	0.00148195	0.0418634	-0.712089	2.82917
GABRG3	-2.35576	-2.88759	-4.66376	0.00148102	0.0418634	-0.867915	2.82944
ZNF652	0.801448	5.16443	4.66319	0.00148216	0.0418634	-1.0198	2.82911
CACNA2D3	-0.955901	4.96174	-4.6583	0.00149182	0.0419689	-1.08624	2.82628
KIAA0232	-0.626766	6.28045	-4.6578	0.0014928	0.0419689	-1.15345	2.826
PSME2	-0.85825	6.37964	-4.65816	0.0014921	0.0419689	-1.17745	2.8262
SLC39A6	0.446209	8.50277	4.64495	0.00151857	0.0426275	-1.26536	2.81857
POM121C	0.708262	4.63006	4.64116	0.00152626	0.0427775	-0.992713	2.81637
C19orf66	-0.715658	1.80184	-4.63773	0.00153325	0.0429075	-0.974724	2.81439
CDKN3	-1.47457	4.49514	-4.63598	0.00153682	0.0429212	-1.06208	2.81338
FDPS	-0.855181	7.67886	-4.63519	0.00153846	0.0429212	-1.25738	2.81292
BTBD3	-0.777255	5.17051	-4.63385	0.0015412	0.0429321	-1.11853	2.81214
PTPN22	2.94398	-3.3351	4.63123	0.00154659	0.0429509	-0.966507	2.81063
SMAD7	0.90877	3.64598	4.6315	0.00154604	0.0429509	-0.906174	2.81078
EXTL2	-0.525212	6.32892	-4.62809	0.00155308	0.0429685	-1.20914	2.80881
MEST	1.48984	4.99897	4.62751	0.0015543	0.0429685	-1.21081	2.80847
WDR45B	0.446658	7.69855	4.62833	0.00155259	0.0429685	-1.26234	2.80894
DOK6	0.506373	5.15815	4.62402	0.00156155	0.0431036	-1.10763	2.80644
ZNFX1	0.589944	6.03049	4.61667	0.00157695	0.0434628	-1.1792	2.80218
NOG	3.23591	-3.76769	4.61491	0.00158066	0.0434993	-0.994697	2.80116
MT-ATP6	0.774352	7.17348	4.61007	0.00159093	0.0436001	-1.2573	2.79835
SLC25A38	0.587041	4.69893	4.6098	0.00159151	0.0436001	-1.04188	2.79819
TNPO2	0.7294	7.60426	4.61195	0.00158693	0.0436001	-1.25014	2.79944
CYP1A1	1.11755	1.69587	4.60736	0.0015967	0.0436766	-0.771322	2.79678
B4GALT6	-1.52576	4.967	-4.60398	0.00160395	0.0436782	-1.21866	2.79481
NUCB2	0.48392	5.53479	4.60479	0.0016022	0.0436782	-1.1921	2.79528
SAMHD1	0.504937	5.62082	4.60528	0.00160116	0.0436782	-1.13069	2.79556
NCEH1	0.872472	3.40543	4.60191	0.00160839	0.0437338	-0.909809	2.79361
VPRBP	-0.625971	4.31573	-4.5957	0.00162183	0.0440335	-1.07581	2.79
ESR2	3.29848	-2.91044	4.59414	0.00162521	0.0440595	-0.995058	2.78909
TRIM56	-0.903158	3.31374	-4.59179	0.00163033	0.0441328	-1.04315	2.78772
AEBP1	-1.32511	4.91771	-4.59	0.00163425	0.0441733	-1.23819	2.78668
COL19A1	-0.740597	4.04668	-4.5867	0.0016415	0.0442836	-1.16364	2.78476
GDF1	-1.78256	-2.14507	-4.58483	0.00164562	0.0442836	-0.866015	2.78367
PEF1	0.910535	5.87471	4.58537	0.00164443	0.0442836	-1.20491	2.78399
NGRN	0.687699	5.37022	4.57989	0.00165655	0.0443157	-1.15243	2.7808
OSBP	0.559163	6.45826	4.58189	0.00165211	0.0443157	-1.25924	2.78196
PAM	0.683343	8.97968	4.58055	0.00165509	0.0443157	-1.38089	2.78118
SLC7A6OS	0.619591	4.73804	4.5825	0.00165077	0.0443157	-1.11001	2.78231
CORIN	-1.6557	1.4393	-4.5747	0.00166814	0.0444952	-0.904714	2.77777
RAPGEF4	-1.86348	3.85345	-4.5751	0.00166723	0.0444952	-1.14225	2.77801
MPP3	0.928009	2.49857	4.56914	0.00168062	0.0447626	-0.952411	2.77453
PABPC1	-0.934109	8.55757	-4.56724	0.00168493	0.0448117	-1.3762	2.77342
SYNGR1	-0.908961	3.66809	-4.56575	0.00168831	0.0448363	-0.978309	2.77255
ADRB2	-2.1558	-1.0605	-4.56156	0.00169784	0.0449265	-0.840473	2.7701
HIST2H2BE	-1.48587	6.56544	-4.561	0.00169911	0.0449265	-1.32418	2.76978
WT1	-0.744139	2.99202	-4.56223	0.0016963	0.0449265	-0.987401	2.7705
PIK3CD	-1.28684	-0.4434	-4.55881	0.00170413	0.0449487	-0.832746	2.7685
VAMP1	1.46741	0.856214	4.55848	0.00170488	0.0449487	-0.820966	2.76831
MYL12A	-0.649131	7.29252	-4.55376	0.00171574	0.045118	-1.36904	2.76555
TLR6	-2.14009	-0.464116	-4.55354	0.00171626	0.045118	-0.901969	2.76542
RAB39B	1.56407	3.43519	4.5502	0.00172398	0.0452355	-0.895103	2.76347
ZRANB1	-0.461406	5.93015	-4.54946	0.00172569	0.0452355	-1.29458	2.76304
NR4A2	1.20943	0.655684	4.54686	0.00173175	0.045329	-0.845078	2.76152
EIF4A2	0.491729	9.19925	4.54237	0.00174225	0.0454307	-1.4263	2.75889
MYH15	-3.29846	5.27688	-4.54309	0.00174057	0.0454307	-1.32217	2.75931
TRAF1	1.17901	2.49245	4.542	0.00174312	0.0454307	-0.933579	2.75867
ABCA10	-1.75319	-0.948004	-4.53758	0.00175355	0.0454425	-0.87657	2.75608
CTBS	-0.768711	4.21822	-4.53797	0.00175261	0.0454425	-1.20461	2.75631
ISLR2	-1.33943	3.01261	-4.53895	0.0017503	0.0454425	-1.02298	2.75689
RGS5	-0.890036	12.0214	-4.53864	0.00175103	0.0454425	-1.57416	2.75671
STC2	1.82367	6.98163	4.53569	0.001758	0.0454933	-1.2793	2.75498
OAT	0.664217	6.26115	4.53003	0.00177147	0.045674	-1.29611	2.75167
PLVAP	-2.90709	-3.86968	-4.5296	0.00177251	0.045674	-0.938269	2.75141
ZNF621	1.05806	4.49134	4.53105	0.00176905	0.045674	-1.09891	2.75226
ITPRIPL2	-0.58326	4.54653	-4.52788	0.00177662	0.0457154	-1.30197	2.75041
NEU1	0.815249	5.95883	4.52628	0.00178048	0.04575	-1.28442	2.74946
ABCG1	3.42269	0.780397	4.52222	0.00179025	0.0458074	-1.01758	2.74709
C1orf27	0.507502	6.25362	4.5224	0.00178981	0.0458074	-1.34289	2.74719
WNK4	2.50706	-3.10278	4.5234	0.00178741	0.0458074	-0.961116	2.74778
ACTN1	-0.842902	7.61158	-4.51678	0.00180345	0.0459514	-1.4094	2.7439
FRMD3	-1.43211	5.45832	-4.51828	0.00179981	0.0459514	-1.25253	2.74477
NBPF10	0.587588	4.32428	4.51691	0.00180313	0.0459514	-1.23011	2.74397
H19	-2.34845	4.17574	-4.51519	0.00180733	0.045986	-1.3328	2.74296
PCBD1	1.15084	5.6369	4.51282	0.00181313	0.0460692	-1.26285	2.74157
CDKN2AIPNL	-0.818133	5.69319	-4.51079	0.00181811	0.0461314	-1.33489	2.74038
LINC00909	0.735824	4.24834	4.50857	0.00182356	0.0461412	-1.18325	2.73908
RNASEH2B	-0.83064	4.31022	-4.50878	0.00182304	0.0461412	-1.25864	2.7392
CATSPER3	2.21088	-2.23304	4.50262	0.00183831	0.0463926	-1.03987	2.73558
DGCR6L	0.684917	5.14388	4.50251	0.00183859	0.0463926	-1.25356	2.73551
CLCN3	-1.20512	8.81744	-4.50103	0.00184226	0.0464209	-1.50411	2.73465
THUMPD1	-1.20123	6.37286	-4.49946	0.0018462	0.0464558	-1.39691	2.73372
TP53I11	-0.800873	4.20198	-4.49796	0.00184995	0.046486	-1.29093	2.73284
ZNF260	-0.633504	5.83674	-4.4908	0.00186795	0.0468738	-1.37009	2.72863
ARL3	-0.470037	5.22264	-4.48874	0.00187318	0.0468758	-1.33186	2.72742
CYTH4	-2.71379	-2.39584	-4.48919	0.00187205	0.0468758	-0.944776	2.72768
MRPL23-AS1	-2.42684	-2.10761	-4.48561	0.00188114	0.046955	-0.929581	2.72558
RGS19	-0.979101	2.8988	-4.48446	0.00188408	0.046955	-1.07375	2.7249
RP11-438N16.1	1.36012	2.14419	4.48538	0.00188173	0.046955	-0.910911	2.72544
FENDRR	-2.39521	-0.227951	-4.48221	0.00188984	0.0470343	-1.02144	2.72358
ARHGAP21	-0.798369	6.14848	-4.47797	0.00190073	0.0470975	-1.4125	2.72108
NCDN	0.708234	5.72761	4.47717	0.0019028	0.0470975	-1.33689	2.72061
RBMX2	-0.526424	4.63788	-4.47935	0.00189718	0.0470975	-1.29167	2.72189
SLC15A2	2.41572	-2.49987	4.47779	0.00190119	0.0470975	-1.04838	2.72097
TMEM108	-0.959187	6.11436	-4.4762	0.0019053	0.0470975	-1.37822	2.72004
TSSK3	1.62946	-2.4053	4.46863	0.00192499	0.0475196	-0.990519	2.71557
PIK3R3	-0.597206	5.36955	-4.46633	0.001931	0.0476033	-1.35915	2.71422
PDE8B	1.48895	0.813401	4.46489	0.00193479	0.0476324	-0.938987	2.71337
TMCC3	-1.45685	-1.01213	-4.46342	0.00193866	0.0476632	-0.939517	2.7125
FBXO5	-1.01194	5.0435	-4.45932	0.00194949	0.0477062	-1.35232	2.71008
HIST1H2BF	-1.6322	5.55552	-4.45518	0.00196049	0.0477062	-1.40894	2.70764
LINC00478	-1.54893	2.16726	-4.45548	0.00195971	0.0477062	-1.02124	2.70781
MYL6B	-0.99777	6.41401	-4.45501	0.00196096	0.0477062	-1.46154	2.70753
NAA20	-0.553863	6.41244	-4.45486	0.00196136	0.0477062	-1.44773	2.70744
RP11-57H14.3	2.16037	-4.01649	4.45697	0.00195572	0.0477062	-1.1801	2.70869
SEMA3E	1.2667	2.87062	4.45722	0.00195507	0.0477062	-0.973648	2.70884
ZNF720	-0.911562	3.90462	-4.4601	0.00194742	0.0477062	-1.21059	2.71054
FSTL3	1.68366	2.32367	4.45298	0.00196637	0.0477644	-1.02435	2.70634
MYO18B	3.10132	-1.71325	4.45181	0.00196949	0.0477766	-1.12934	2.70565
PNLIP	-1.62466	-3.75158	-4.44931	0.00197622	0.047876	-0.998057	2.70416
LINC00189	-1.52861	-0.400117	-4.44724	0.00198178	0.0479235	-1.00866	2.70294
NRP2	1.9533	3.20845	4.44565	0.00198607	0.0479235	-1.02144	2.70201
SLC38A4	3.01929	-2.615	4.44588	0.00198545	0.0479235	-1.00317	2.70214
LGALS8-AS1	1.84001	-2.82698	4.44384	0.00199097	0.0479782	-1.08117	2.70094
MIR381HG	-2.95815	-1.3719	-4.43956	0.00200261	0.0481949	-0.985723	2.6984
CHD7	-0.475865	6.70704	-4.43757	0.00200805	0.0481984	-1.48315	2.69723
CLDN11	-1.08114	2.55279	-4.43765	0.00200785	0.0481984	-1.27436	2.69727
KLF4	2.13697	2.19265	4.43661	0.00201069	0.0481985	-1.06707	2.69665
ITGB3	-1.56853	1.72525	-4.43255	0.00202184	0.048275	-1.10433	2.69425
KIAA0895	-1.38509	4.44869	-4.43315	0.00202019	0.048275	-1.33762	2.69461
ZMYM4	-0.51667	6.60783	-4.43402	0.0020178	0.048275	-1.50229	2.69512
EWSR1	-0.509383	7.98104	-4.42619	0.00203945	0.0485859	-1.55229	2.69049
IFITM3	-0.701249	1.97317	-4.42593	0.00204019	0.0485859	-1.46604	2.69033
HNRNPA1	-0.638396	9.78706	-4.4212	0.0020534	0.0487131	-1.63343	2.68753
REC8	-0.554027	4.70453	-4.42168	0.00205206	0.0487131	-1.39191	2.68781
STXBP5-AS1	-1.56751	-0.185687	-4.42114	0.00205355	0.0487131	-0.990013	2.68749
AL022341.3	1.69535	-0.942456	4.41113	0.00208184	0.0490423	-1.04814	2.68155
C1GALT1C1	0.609134	4.76283	4.40806	0.00209058	0.0490423	-1.32995	2.67973
CUL2	-0.891032	6.36866	-4.40977	0.00208569	0.0490423	-1.52095	2.68075
LINC00973	-1.75726	-1.20045	-4.40879	0.0020885	0.0490423	-1.00681	2.68017
RHOT1	0.51203	5.31845	4.41428	0.0020729	0.0490423	-1.38637	2.68342
RP11-219G17.4	-1.66639	-1.98533	-4.40858	0.00208908	0.0490423	-1.00943	2.68004
RP11-435B5.4	0.847817	1.73134	4.40768	0.00209166	0.0490423	-1.08195	2.67951
TRPM8	-2.99429	-0.621236	-4.40978	0.00208566	0.0490423	-1.00728	2.68076
ZNF383	0.668403	3.4232	4.41232	0.00207844	0.0490423	-1.18724	2.68226
ANXA3	4.37345	-1.19966	4.4051	0.00209905	0.0490892	-1.0649	2.67798
HCRT	3.14342	-4.1983	4.40551	0.00209789	0.0490892	-1.20589	2.67822
CDK8	0.501308	5.91953	4.40339	0.00210397	0.0491071	-1.45471	2.67696
FAR1	-0.490455	6.09252	-4.40296	0.0021052	0.0491071	-1.51334	2.67671
C9orf116	-0.987218	2.23304	-4.39989	0.00211406	0.0491926	-1.17486	2.67488
CACNB2	1.22441	-0.225128	4.39982	0.00211427	0.0491926	-1.07227	2.67484
RP11-380L11.4	-3.42801	-2.5043	-4.39363	0.00213224	0.0494935	-1.04345	2.67116
TBC1D4	-0.949086	6.50288	-4.3935	0.00213264	0.0494935	-1.52951	2.67108
LAYN	0.968381	3.03901	4.38993	0.0021431	0.0496729	-1.2591	2.66896
NBPF1	0.496707	5.8383	4.38536	0.00215654	0.0499212	-1.52945	2.66624
IRGM	-1.99009	-3.28655	-4.38135	0.00216842	0.0501234	-1.08766	2.66386
VMA21	-0.966559	7.2206	-4.38056	0.00217078	0.0501234	-1.59799	2.66338
PDE3A	-1.05712	5.09075	-4.3786	0.00217662	0.0501946	-1.55956	2.66222
APOBEC3D	-1.42904	-0.614238	-4.37303	0.00219332	0.0502779	-1.055	2.6589
DDR1	0.588394	5.6282	4.37622	0.00218374	0.0502779	-1.50012	2.6608
P2RX4	1.56448	3.56835	4.37488	0.00218776	0.0502779	-1.22216	2.66
ROCK1	-0.675573	6.66372	-4.37279	0.00219404	0.0502779	-1.59365	2.65876
SOX18	-1.4	1.37154	-4.37309	0.00219313	0.0502779	-1.09827	2.65894
DDX51	0.554046	4.94744	4.36969	0.00220338	0.0504286	-1.43673	2.65691
FAM124A	-1.20774	2.77259	-4.36708	0.00221129	0.0505461	-1.15347	2.65535
BAMBI	0.730057	4.9577	4.36253	0.00222517	0.050736	-1.32931	2.65264
CEP57L1	-0.760708	3.84403	-4.36266	0.00222476	0.050736	-1.33451	2.65272
ZFHX4	0.624328	4.9056	4.35895	0.00223612	0.050922	-1.41827	2.65051
CD96	-1.82918	-0.941159	-4.35614	0.00224477	0.0510147	-1.12232	2.64883
CTD-2201I18.1	2.89798	-3.73972	4.35219	0.00225699	0.0510147	-1.26599	2.64647
ECHDC3	-0.717602	2.41575	-4.35522	0.00224761	0.0510147	-1.27711	2.64828
LTBP2	-0.748191	1.92879	-4.35304	0.00225438	0.0510147	-1.27019	2.64697
MIR210HG	-2.27508	-0.657875	-4.35404	0.00225126	0.0510147	-1.07383	2.64757
TPH1	1.66699	-1.49254	4.35289	0.00225483	0.0510147	-1.11522	2.64689
NMI	-1.28512	2.20208	-4.35107	0.00226049	0.0510305	-1.35378	2.6458
SRGN	3.73167	-4.17006	4.35001	0.0022638	0.0510419	-1.24904	2.64516
PTPDC1	-0.646792	4.31261	-4.34631	0.00227535	0.0512389	-1.41722	2.64295
DDRGK1	0.517478	5.40457	4.34349	0.00228418	0.0512959	-1.50375	2.64127
PIP4K2A	-0.561441	5.93921	-4.34314	0.00228527	0.0512959	-1.60053	2.64106
STS	-0.99145	1.68564	-4.34281	0.00228632	0.0512959	-1.1325	2.64086
CALCOCO2	-0.542259	5.60615	-4.33545	0.00230962	0.0517385	-1.60801	2.63646
PALM3	-3.27571	-0.810965	-4.33478	0.00231173	0.0517385	-1.10017	2.63606
HIST1H2BG	-1.67802	6.84424	-4.32778	0.00233415	0.0521121	-1.66603	2.63187
IFNGR1	1.70323	4.99061	4.32856	0.00233165	0.0521121	-1.36169	2.63234
CCNE1	-1.22063	3.20687	-4.32558	0.00234125	0.0522067	-1.3861	2.63055
CKAP2L	-1.88635	4.47367	-4.32068	0.00235713	0.0524325	-1.5753	2.62762
EFNA5	-0.539496	4.9288	-4.32099	0.00235613	0.0524325	-1.54479	2.6278
KIAA1614	-1.09462	3.05545	-4.31807	0.00236563	0.0525574	-1.3269	2.62605
RP11-288H12.4	-1.59331	0.00113423	-4.31121	0.00238814	0.0529929	-1.14429	2.62194
ATP9B	0.651532	4.38472	4.30903	0.00239535	0.0530882	-1.4647	2.62063
PCDH1	1.95548	2.84083	4.30806	0.00239854	0.0530944	-1.14039	2.62005
CCDC115	0.815665	4.2733	4.30579	0.00240609	0.0531323	-1.49284	2.61869
RP11-171A24.3	-0.92261	-0.948801	-4.30603	0.0024053	0.0531323	-1.21354	2.61883
RP11-114H23.2	-2.73342	-0.438875	-4.30398	0.00241212	0.0531367	-1.1376	2.6176
RP11-50E11.3	1.73695	1.47866	4.30448	0.00241044	0.0531367	-1.16001	2.6179
FAM163A	0.743595	5.61268	4.30032	0.00242436	0.0533417	-1.53875	2.6154
COL1A1	1.12307	5.26272	4.29733	0.0024344	0.0534336	-1.68673	2.61361
TRNT1	-0.610057	3.95389	-4.29775	0.00243299	0.0534336	-1.42902	2.61386
RP11-783K16.13	1.33794	0.89123	4.29604	0.00243873	0.0534643	-1.16191	2.61284
SMYD2	-1.09153	5.70328	-4.29313	0.00244859	0.0536159	-1.66442	2.61108
DISC1	-1.22854	3.07466	-4.28866	0.00246378	0.0538458	-1.42004	2.6084
LINC00665	0.902241	4.29354	4.2883	0.002465	0.0538458	-1.41286	2.60818
RP11-307B6.3	2.13984	-3.69094	4.28427	0.00247882	0.0540828	-1.25217	2.60576
C5AR1	1.60297	-2.47286	4.28108	0.00248977	0.0542032	-1.21956	2.60384
HSPA6	2.04678	-1.45134	4.28093	0.00249029	0.0542032	-1.18249	2.60375
PPP1R3G	-2.43478	-3.47021	-4.27849	0.00249875	0.0542221	-1.20211	2.60228
RP11-248G5.8	0.762405	3.65423	4.2795	0.00249523	0.0542221	-1.36942	2.60289
RP11-875O11.1	-1.82156	-2.01887	-4.2781	0.00250008	0.0542221	-1.17033	2.60205
RP11-473I1.10	-0.672591	5.77036	-4.27525	0.00250999	0.0543076	-1.66936	2.60033
SLMO2	-0.622348	7.51419	-4.27532	0.00250974	0.0543076	-1.7506	2.60037
AC005592.2	-2.02532	-0.410252	-4.27265	0.00251906	0.0543836	-1.17961	2.59876
C1QL3	-2.15382	-0.907911	-4.27253	0.00251947	0.0543836	-1.25108	2.59869
HCST	2.49806	-0.921545	4.26654	0.00254049	0.0547272	-1.23285	2.59508
PHF11	-0.840223	1.49357	-4.26541	0.00254449	0.0547272	-1.37802	2.5944
PI4K2B	-1.03886	4.88259	-4.26458	0.0025474	0.0547272	-1.63501	2.5939
SNRNP70	-0.606731	6.82541	-4.26622	0.00254163	0.0547272	-1.73746	2.59489
NBPF8	0.747176	3.13774	4.2581	0.00257044	0.055157	-1.40326	2.58999
DCAF17	0.68424	4.71593	4.2543	0.00258405	0.0553838	-1.57973	2.5877
TSPYL2	1.07637	4.08062	4.24915	0.00260261	0.055716	-1.43141	2.58459
TBX20	0.791246	4.16075	4.24753	0.00260846	0.0557756	-1.43105	2.58362
AC004893.11	1.10394	1.49976	4.23487	0.00265481	0.0557936	-1.26002	2.57597
AMBRA1	0.447597	5.33996	4.24035	0.00263466	0.0557936	-1.6773	2.57928
BICD2	-0.715389	6.90511	-4.23506	0.00265412	0.0557936	-1.78533	2.57608
CRMP1	0.888969	4.22523	4.24484	0.00261825	0.0557936	-1.27837	2.58199
CYLD	-0.56361	5.51426	-4.24056	0.00263387	0.0557936	-1.72105	2.57941
FAM200B	1.2908	4.96447	4.23821	0.00264252	0.0557936	-1.53952	2.57798
FAT1	0.636965	5.98368	4.2442	0.00262056	0.0557936	-1.77757	2.58161
LRRC66	2.94076	-1.83619	4.24358	0.00262285	0.0557936	-1.25628	2.58123
PISD	0.732901	5.57244	4.23476	0.00265523	0.0557936	-1.65814	2.5759
PTDSS1	0.765017	7.21092	4.24634	0.00261278	0.0557936	-1.74739	2.5829
RP11-259K5.2	1.80469	0.26025	4.23853	0.00264134	0.0557936	-1.21932	2.57818
RP11-469H8.6	-2.95933	-3.25621	-4.2419	0.00262896	0.0557936	-1.30587	2.58022
RPRM	2.68392	-1.81746	4.23717	0.00264634	0.0557936	-1.22604	2.57735
SEC11A	0.395812	7.67061	4.23535	0.00265306	0.0557936	-1.7975	2.57625
TNNC1	3.54046	-3.79067	4.23732	0.00264579	0.0557936	-1.37168	2.57744
AC011526.1	2.62281	-3.70237	4.22828	0.00267931	0.0561402	-1.38269	2.57198
FICD	1.23761	2.85787	4.22847	0.00267861	0.0561402	-1.35906	2.57209
PANX1	0.490468	5.64717	4.22783	0.00268097	0.0561402	-1.67879	2.57171
COL3A1	0.815069	8.27676	4.22547	0.00268982	0.0561962	-1.97455	2.57028
ICK	0.543037	5.14967	4.22548	0.00268979	0.0561962	-1.65645	2.57028
AKIP1	0.571918	4.03463	4.22342	0.00269752	0.0562236	-1.55343	2.56904
CHST15	2.27111	1.18681	4.22235	0.00270155	0.0562236	-1.25011	2.56839
MTG2	0.700535	5.53858	4.22102	0.00270656	0.0562236	-1.70197	2.56758
NSDHL	-0.652868	4.68592	-4.22305	0.00269892	0.0562236	-1.63653	2.56881
PKDCC	1.17286	3.91373	4.2213	0.0027055	0.0562236	-1.43811	2.56775
SDK1	-0.831792	1.94406	-4.20934	0.00275101	0.0570819	-1.54686	2.56051
AC091633.3	3.31072	-3.17282	4.2021	0.00277898	0.0571644	-1.413	2.55611
ANGPTL2	-0.653515	3.61397	-4.20362	0.00277307	0.0571644	-1.52591	2.55704
ANXA10	-3.16045	-0.353747	-4.20335	0.00277412	0.0571644	-1.49657	2.55687
C1QL4	-1.08503	0.843449	-4.20399	0.00277164	0.0571644	-1.29502	2.55726
FOXK2	-0.376502	7.31897	-4.20182	0.00278009	0.0571644	-1.8591	2.55594
GRAMD1A	-0.651403	5.86858	-4.2048	0.00276851	0.0571644	-1.78494	2.55775
HBS1L	-1.11451	5.59064	-4.20443	0.00276993	0.0571644	-1.73927	2.55753
PARVB	-0.63998	3.80024	-4.20337	0.00277404	0.0571644	-1.53412	2.55689
BRAP	0.487644	6.21652	4.20056	0.00278496	0.0571812	-1.79167	2.55518
RPS6KA3	-0.964405	7.10396	-4.19999	0.00278718	0.0571812	-1.86986	2.55483
CCL5	2.02925	-2.53709	4.19469	0.00280791	0.0575416	-1.36175	2.55162
HNRNPA1L2	-0.532145	6.50315	-4.18976	0.00282735	0.0578749	-1.82159	2.54862
NREP	-0.964642	6.50516	-4.188	0.00283431	0.0579522	-1.83304	2.54755
NAPB	1.19077	4.71006	4.18488	0.0028467	0.0581404	-1.57389	2.54566
GPSM1	-0.587495	5.11841	-4.18377	0.00285113	0.0581656	-1.73863	2.54498
KCNAB1	-2.04265	1.24795	-4.18196	0.00285839	0.0582485	-1.31927	2.54388
FBXW4	0.944426	4.30207	4.17926	0.00286919	0.0584033	-1.60805	2.54224
HTR2A	-2.39316	-1.29724	-4.17552	0.00288427	0.0586447	-1.30677	2.53996
10-Sep	-1.18367	4.81494	-4.17426	0.00288935	0.0586532	-1.84693	2.5392
DLG5-AS1	-1.02098	0.111337	-4.17179	0.00289938	0.0586532	-1.32197	2.53769
FRA10AC1	-0.829529	4.32749	-4.17145	0.00290079	0.0586532	-1.72243	2.53748
SLC12A9	-0.656833	4.04276	-4.17153	0.00290044	0.0586532	-1.65246	2.53754
SNX11	0.571546	4.98549	4.17225	0.00289753	0.0586532	-1.7421	2.53797
ZKSCAN5	0.517443	5.93603	4.16598	0.0029231	0.0590388	-1.82405	2.53416
PI4K2A	0.698699	5.61287	4.16415	0.0029306	0.0590709	-1.76606	2.53304
UBE2Q1	-0.461594	6.98142	-4.16401	0.00293117	0.0590709	-1.90164	2.53296
NFS1	0.946756	5.13056	4.15962	0.00294931	0.0593053	-1.73695	2.53028
RP11-119F19.2	0.826962	2.11458	4.16016	0.00294704	0.0593053	-1.38412	2.53061
KY	-1.87317	-2.12241	-4.15675	0.00296118	0.0594783	-1.32216	2.52853
UBE2V2	-1.42587	6.41379	-4.15491	0.00296886	0.0595669	-1.89326	2.52741
HRAS	-0.482386	4.58015	-4.15409	0.0029723	0.0595702	-1.76094	2.52691
ARRDC3	-0.906854	7.41573	-4.15193	0.00298133	0.0596605	-1.94892	2.52559
NDUFAF1	0.529408	4.54816	4.15144	0.00298335	0.0596605	-1.65742	2.5253
DHX36	-0.446803	6.92617	-4.15039	0.00298776	0.0596831	-1.90596	2.52465
C11orf87	-3.20146	-3.19514	-4.14941	0.00299186	0.0596919	-1.33126	2.52406
GAMT	-1.25902	2.91749	-4.14873	0.00299475	0.0596919	-1.62277	2.52364
DYNLT3	-0.670185	4.8051	-4.14682	0.0030028	0.0597868	-1.81692	2.52247
ABCA8	-2.07698	-3.61582	-4.14242	0.0030214	0.0600719	-1.35019	2.51979
CHRAC1	-0.942184	4.53703	-4.14188	0.00302371	0.0600719	-1.8097	2.51946
AP5Z1	0.69097	4.85724	4.13832	0.00303889	0.0601766	-1.7694	2.51729
TAF9B	-0.868343	4.68579	-4.13857	0.00303781	0.0601766	-1.76619	2.51744
ZFYVE27	0.665146	5.14047	4.13875	0.00303703	0.0601766	-1.76738	2.51755
GMNC	-2.32201	-4.04597	-4.13319	0.00306091	0.0605231	-1.37706	2.51415
RP11-475N22.4	-0.579231	3.83718	-4.13269	0.00306303	0.0605231	-1.6575	2.51385
PARPBP	-0.905596	4.69882	-4.13129	0.00306908	0.0605769	-1.78164	2.51299
OTUD4	-0.614223	6.54459	-4.12748	0.00308559	0.0608368	-1.94772	2.51066
HIST1H2AB	-1.94837	5.51102	-4.12099	0.00311395	0.0612861	-1.90223	2.50669
IFI44	-1.07166	0.980141	-4.12072	0.0031151	0.0612861	-1.79287	2.50653
CCDC19	-1.6168	-0.813891	-4.10896	0.00316718	0.0622434	-1.38464	2.49933
AMOTL1	-0.808612	7.01043	-4.10689	0.00317646	0.0623585	-1.9599	2.49806
DENND2C	2.91574	-3.33137	4.1027	0.0031953	0.062661	-1.52572	2.49549
NXPE2	-2.216	-3.2518	-4.0991	0.0032116	0.0629129	-1.39992	2.49328
KIRREL3	-1.87903	-1.19957	-4.09625	0.00322453	0.0630982	-1.4009	2.49153
EFEMP2	-0.664885	5.03256	-4.09542	0.00322833	0.0631048	-1.92072	2.49102
BMP3	2.56883	-3.5054	4.09463	0.00323192	0.0631073	-1.45979	2.49054
PHYHIPL	-0.901987	6.15602	-4.09333	0.00323786	0.0631556	-1.94193	2.48974
HARS	0.494862	7.1824	4.09247	0.00324182	0.0631652	-1.99029	2.48921
BCL2L2	-0.827823	4.66887	-4.08823	0.00326131	0.0634492	-1.86158	2.48661
LINC00263	-1.99287	1.53682	-4.08778	0.00326336	0.0634492	-1.50993	2.48634
YWHAZ	-0.466675	9.45256	-4.08653	0.00326915	0.063494	-2.11459	2.48557
FUBP1	-1.04305	7.31928	-4.08426	0.00327963	0.0636298	-2.03545	2.48417
RP11-690D19.3	-1.20775	1.21893	-4.0806	0.00329669	0.0638927	-1.468	2.48192
RP11-137H2.6	-1.09719	3.64047	-4.07883	0.00330494	0.0639844	-1.83039	2.48084
C19orf18	2.08774	-1.8513	4.07254	0.00333448	0.0643513	-1.45027	2.47697
RP11-21L23.2	-1.68494	-0.685905	-4.07326	0.00333109	0.0643513	-1.42797	2.47741
SEC22C	-0.78469	4.78452	-4.07301	0.00333226	0.0643513	-1.88856	2.47726
RP11-1E3.1	1.77864	-1.81631	4.0695	0.00334886	0.0645604	-1.46598	2.4751
KIF15	-1.34603	4.39728	-4.06746	0.00335859	0.0646111	-1.888	2.47384
LSMEM1	1.47894	-0.0529109	4.06786	0.00335669	0.0646111	-1.43485	2.47409
PARP6	0.806055	4.91411	4.06653	0.00336301	0.064628	-1.86078	2.47327
ARG2	-1.53294	2.83764	-4.06441	0.0033731	0.0647535	-1.72312	2.47197
MAP3K1	-0.647492	8.37426	-4.05882	0.00339998	0.0651323	-2.1011	2.46852
NUSAP1	-1.00208	6.32868	-4.05931	0.00339758	0.0651323	-2.0229	2.46883
ABCB7	-0.599013	4.86162	-4.05735	0.00340704	0.0651755	-1.8948	2.46762
ANTXR2	-0.729388	8.00018	-4.05687	0.00340939	0.0651755	-2.13939	2.46732
CBLN2	-1.46311	0.601143	-4.05411	0.00342276	0.0652257	-1.50014	2.46562
TMEM9B	0.587079	5.29134	4.05523	0.00341729	0.0652257	-1.92985	2.46632
VPS16	-0.463942	4.80679	-4.05419	0.00342234	0.0652257	-1.958	2.46568
HIC1	-1.42798	1.08305	-4.05239	0.00343109	0.0652723	-1.58149	2.46457
HIST1H4B	-1.56189	6.4499	-4.05213	0.00343237	0.0652723	-2.0446	2.46441
ATG4C	-1.06168	4.07632	-4.04911	0.0034471	0.0654607	-1.89703	2.46255
CBS	-0.787928	6.73119	-4.04758	0.00345463	0.0654607	-2.04769	2.4616
MLF2	0.506554	6.8674	4.04591	0.00346279	0.0654607	-2.04838	2.46057
MMP17	-1.22767	1.80906	-4.0457	0.00346383	0.0654607	-1.66431	2.46044
PIK3CA	-0.690468	5.89482	-4.04656	0.00345962	0.0654607	-2.0277	2.46097
TTC13	-0.655689	5.66403	-4.04583	0.00346323	0.0654607	-2.01498	2.46052
CTSD	0.57916	6.16639	4.04329	0.00347574	0.0655167	-2.03465	2.45895
FADS2	-0.789777	8.24004	-4.04291	0.00347758	0.0655167	-2.14837	2.45872
FAM199X	-0.557607	6.00518	-4.04332	0.00347558	0.0655167	-2.02969	2.45897
CEP70	-0.869069	3.70491	-4.03936	0.00349519	0.0655521	-1.88989	2.45653
CTD-2184D3.5	-1.88069	-2.25749	-4.03919	0.003496	0.0655521	-1.47541	2.45643
NUAK1	0.750609	4.10842	4.0389	0.00349746	0.0655521	-1.9088	2.45625
RPRD2	0.563946	5.10598	4.04129	0.00348559	0.0655521	-1.92093	2.45772
TMOD1	-1.44614	5.44091	-4.03945	0.00349471	0.0655521	-1.91856	2.45659
FGFR4	-1.09222	2.88591	-4.03811	0.00350141	0.0655587	-1.82337	2.45576
RP11-873E20.1	-3.14429	-1.27991	-4.03586	0.00351259	0.0657005	-1.52692	2.45437
CCDC33	-2.29244	-0.333917	-4.03353	0.00352427	0.0658514	-1.47859	2.45293
AC091133.1	-1.29162	-1.34127	-4.02797	0.00355221	0.0660349	-1.48757	2.4495
GBAS	-0.536608	6.247	-4.02975	0.00354325	0.0660349	-2.05322	2.4506
NEDD4	-0.507707	5.7175	-4.02823	0.00355095	0.0660349	-2.03369	2.44966
RP11-798M19.3	-1.7085	-0.697081	-4.02928	0.00354564	0.0660349	-1.49156	2.45031
TGFB2	2.25014	-1.58333	4.02806	0.0035518	0.0660349	-1.52761	2.44955
AASS	-0.68978	3.70238	-4.02541	0.00356521	0.0662089	-1.96799	2.44792
CTR9	-0.551056	6.46639	-4.02375	0.00357363	0.0662977	-2.0906	2.44689
KIF20A	-0.855355	6.44915	-4.02008	0.00359234	0.0664826	-2.08808	2.44462
SEPHS1	-0.570779	7.25854	-4.01965	0.00359454	0.0664826	-2.12686	2.44436
U2AF2	-0.496289	7.24068	-4.02086	0.00358835	0.0664826	-2.11198	2.44511
LINC00202-1	2.20651	-4.18132	4.01831	0.00360141	0.0665134	-1.6304	2.44353
LZIC	-0.580015	4.1309	-4.0179	0.00360351	0.0665134	-1.90485	2.44327
EIF3L	-0.472471	8.28176	-4.01516	0.00361757	0.0667054	-2.16022	2.44158
KNDC1	3.38757	-2.25811	4.01235	0.00363213	0.0669049	-1.57821	2.43984
ZNF319	0.74239	3.11387	4.01165	0.00363573	0.0669049	-1.70241	2.43941
SMCHD1	-0.62233	6.6593	-4.00996	0.0036445	0.0669984	-2.12769	2.43836
SNX27	0.463562	5.7176	4.00921	0.00364839	0.0670023	-2.03878	2.4379
C19orf57	1.33636	0.909863	4.00706	0.00365959	0.0671404	-1.55606	2.43657
RP4-794H19.4	-2.75408	-3.97771	-4.00254	0.00368324	0.0675062	-1.53523	2.43377
IRAK2	-0.784879	2.34898	-4.00027	0.00369522	0.0676579	-1.74651	2.43236
ATP2A1	1.06502	-0.0306673	3.9967	0.00371407	0.067663	-1.5419	2.43015
DNAJC27	0.899874	3.13978	3.9989	0.00370244	0.067663	-1.7176	2.43151
PEX5	0.45186	6.32169	3.99673	0.00371389	0.067663	-2.09543	2.43017
RBM48	0.519099	4.58091	3.99801	0.00370711	0.067663	-1.93156	2.43096
RP11-481J2.2	-1.79688	-1.77661	-3.99864	0.0037038	0.067663	-1.52371	2.43135
HKR1	0.457159	5.77121	3.99337	0.00373178	0.0679176	-2.08343	2.42808
KIF18A	-0.923503	4.98545	-3.99227	0.00373763	0.0679563	-2.05832	2.4274
DDO	-1.40098	-0.319762	-3.99016	0.00374889	0.0679872	-1.5625	2.4261
HIST1H4D	-1.62272	6.64347	-3.99047	0.00374726	0.0679872	-2.1497	2.42629
LUCAT1	-3.37964	-0.180232	-3.98864	0.00375707	0.0679872	-1.62911	2.42515
OIP5-AS1	-1.01407	7.0177	-3.98846	0.00375799	0.0679872	-2.16019	2.42504
SAMD9L	-1.47518	1.03931	-3.98942	0.00375285	0.0679872	-1.92525	2.42564
HMCN2	-2.57687	4.21042	-3.9846	0.00377877	0.0682952	-2.04687	2.42265
FAM208A	-0.565447	6.76837	-3.98346	0.00378498	0.0683396	-2.15921	2.42194
NSMCE4A	-0.855282	4.82025	-3.98132	0.00379655	0.0684807	-2.02366	2.42061
PELI1	-0.875603	5.41033	-3.98002	0.0038036	0.0685401	-2.09532	2.4198
ALPK2	3.55535	-1.76035	3.97823	0.00381335	0.0686479	-1.56636	2.41869
ZNF778	1.09501	3.62243	3.97665	0.00382199	0.0687354	-1.74458	2.41771
KCNH2	-0.547668	6.17355	-3.97578	0.00382671	0.0687524	-2.0952	2.41717
PLA2G12A	-0.859745	5.24608	-3.97458	0.0038333	0.068803	-2.12939	2.41643
RP3-486I3.7	2.25557	-2.01614	3.9676	0.0038718	0.0694256	-1.63734	2.41209
DMPK	0.563217	3.75099	3.96304	0.00389714	0.0695411	-1.93962	2.40925
EYA4	1.17336	3.70766	3.96365	0.00389375	0.0695411	-1.69103	2.40963
GNPTG	0.537964	5.24482	3.96364	0.00389377	0.0695411	-2.07338	2.40963
RP11-203B9.4	1.89038	-3.18893	3.96332	0.00389557	0.0695411	-1.62778	2.40943
ZNF317	0.474125	6.07496	3.963	0.00389733	0.0695411	-2.13132	2.40923
APLP2	-0.740663	7.94753	-3.96013	0.00391338	0.0697052	-2.23238	2.40745
SAR1A	0.424889	7.94667	3.95999	0.00391418	0.0697052	-2.23322	2.40736
ASAH2	0.870756	2.85103	3.95702	0.00393088	0.0699344	-1.73953	2.40551
COL9A3	-2.45623	1.22316	-3.95566	0.00393854	0.0700023	-1.71855	2.40466
N4BP2	-0.56691	5.3408	-3.95142	0.00396253	0.0702914	-2.10704	2.40203
OBFC1	-0.777619	4.83213	-3.95191	0.00395975	0.0702914	-2.10455	2.40233
PRKAB1	0.537764	5.74904	3.94996	0.00397084	0.0703566	-2.15978	2.40112
TOP2A	-1.31584	8.14741	-3.94942	0.00397392	0.0703566	-2.27687	2.40078
ASB9	-0.760672	0.140494	-3.94754	0.00398464	0.0704777	-1.78045	2.39961
C1orf50	0.609315	3.33507	3.94685	0.00398857	0.0704789	-1.82841	2.39918
G3BP1	-0.531759	8.74737	-3.94522	0.00399791	0.0705755	-2.30081	2.39817
EME2	0.531884	4.21072	3.94157	0.00401892	0.0707407	-1.96166	2.39589
RP11-428J1.4	-2.01874	-2.03228	-3.94205	0.00401615	0.0707407	-1.60165	2.39619
SNX25	-0.957067	5.78855	-3.94285	0.00401152	0.0707407	-2.20257	2.39669
ERCC1	-0.625206	6.00872	-3.93985	0.00402885	0.070847	-2.17762	2.39482
ECM1	-1.211	2.34945	-3.93836	0.00403746	0.07093	-1.98873	2.39389
LETMD1	1.23216	5.71218	3.93616	0.00405024	0.071086	-2.06974	2.39252
SGOL2	-1.91877	5.18276	-3.93493	0.00405741	0.0711434	-2.16033	2.39175
IGFBP6	1.43951	1.8516	3.93255	0.00407131	0.0712466	-1.78229	2.39027
LUC7L	-0.476762	5.92273	-3.93207	0.00407409	0.0712466	-2.18238	2.38997
OLFML3	1.87864	4.06853	3.93108	0.0040799	0.0712466	-1.99998	2.38935
TTC7B	-1.26422	3.99079	-3.93139	0.00407808	0.0712466	-2.01915	2.38954
ZNRD1-AS1	0.656627	2.88995	3.93058	0.00408285	0.0712466	-1.80058	2.38904
MAP3K7	-0.468761	7.16023	-3.92968	0.00408812	0.0712703	-2.26686	2.38848
SYT13	-1.27487	-1.34056	-3.92872	0.00409376	0.0713003	-1.61961	2.38788
SGK2	2.31991	-2.09693	3.9241	0.00412105	0.0717071	-1.66569	2.38499
SIRPA	0.948552	3.33167	3.92227	0.00413186	0.0718266	-2.05217	2.38385
DDR2	0.707485	8.45782	3.92136	0.00413732	0.0718529	-2.29795	2.38328
OXSR1	-0.427808	5.59384	-3.92028	0.00414373	0.0718956	-2.19103	2.38261
ATP5C1	-0.495754	7.77642	-3.91672	0.00416501	0.0719151	-2.29014	2.38038
FAM20B	-0.470625	7.48488	-3.91707	0.00416292	0.0719151	-2.29479	2.3806
MEG9	-2.44111	0.338866	-3.91912	0.00415061	0.0719151	-1.64879	2.38189
RPS6KA2	0.641212	5.69741	3.91684	0.0041643	0.0719151	-2.14179	2.38046
SPATS2L	-0.538776	6.83857	-3.91853	0.00415415	0.0719151	-2.25385	2.38152
TM7SF2	-0.771671	4.2286	-3.91613	0.00416854	0.0719151	-2.07649	2.38002
GSDMD	-1.21856	2.92037	-3.91444	0.00417869	0.0720222	-2.17943	2.37896
GMEB1	-0.498553	4.24238	-3.91353	0.00418417	0.0720483	-2.06568	2.37839
B2M	-0.527366	9.28242	-3.91284	0.00418833	0.0720519	-2.37485	2.37796
GFPT2	-1.67081	2.68324	-3.91106	0.00419905	0.0721681	-2.0915	2.37685
FIGNL1	-0.736972	5.68352	-3.90566	0.00423179	0.0725939	-2.22977	2.37348
ZC3H11A	-0.695545	7.89095	-3.90589	0.00423044	0.0725939	-2.33647	2.37361
CREB1	-0.399571	6.11463	-3.9044	0.00423947	0.0726573	-2.23671	2.37269
NPC1	0.531228	5.5145	3.90024	0.00426499	0.073026	-2.20923	2.37008
FOXD4L1	2.83633	-3.63469	3.89641	0.00428856	0.0731566	-1.73989	2.36769
MCM8	-1.05176	5.76606	-3.89639	0.00428869	0.0731566	-2.24778	2.36768
UBE2R2	-0.678384	6.0279	-3.89646	0.00428827	0.0731566	-2.25077	2.36772
ZNF408	0.597808	3.93149	3.89689	0.0042856	0.0731566	-2.04138	2.36799
PRTFDC1	-1.14036	4.50282	-3.89488	0.00429803	0.0732474	-2.14803	2.36673
MUL1	0.522072	5.39492	3.89255	0.00431253	0.0734258	-2.19677	2.36527
MTO1	0.484985	5.42803	3.8905	0.0043253	0.0734477	-2.14725	2.36398
RP5-983L19.2	5.05423	-3.19634	3.89165	0.00431809	0.0734477	-1.72844	2.36471
TCF3	-0.973233	6.832	-3.8904	0.00432591	0.0734477	-2.31853	2.36392
LINC00669	-0.923466	-1.39108	-3.88863	0.00433697	0.073567	-1.74312	2.36281
DCK	-0.845134	4.5547	-3.88654	0.00435004	0.07372	-2.13706	2.36151
PRRC2C	-0.468115	7.26959	-3.88542	0.00435712	0.0737714	-2.32614	2.3608
ZNHIT6	0.591945	5.36173	3.88315	0.00437138	0.0739441	-2.21804	2.35938
AC064875.2	-3.20918	-0.228166	-3.88113	0.00438417	0.0740793	-1.67769	2.35811
MTUS1	0.611673	6.84559	3.8806	0.0043875	0.0740793	-2.25887	2.35778
HIST1H2AG	-1.36208	6.76802	-3.87951	0.0043944	0.0741269	-2.32734	2.3571
SUSD5	1.44567	0.31805	3.87746	0.00440742	0.0742779	-1.7112	2.35582
AF131217.1	3.38942	-3.22889	3.87171	0.00444419	0.0747463	-1.77114	2.35221
RP11-680F8.1	-1.61172	-2.72738	-3.8719	0.00444298	0.0747463	-1.69318	2.35233
SNX8	0.431501	4.91644	3.87119	0.00444752	0.0747463	-2.18809	2.35188
PREX1	0.691351	3.90845	3.86963	0.0044576	0.0747776	-1.97736	2.3509
RP11-482D24.2	2.32203	-4.07708	3.86997	0.00445539	0.0747776	-1.78971	2.35111
USP7	-0.58345	7.58465	-3.86472	0.00448935	0.0752409	-2.36427	2.34782
RCSD1	2.68589	-3.12137	3.8621	0.00450638	0.075457	-1.79199	2.34617
ARMCX5	0.591578	4.16461	3.85915	0.00452565	0.0754952	-2.05461	2.34432
GPSM2	-0.483768	5.32735	-3.85858	0.00452938	0.0754952	-2.25799	2.34396
METTL21B	0.770174	3.1228	3.85916	0.00452556	0.0754952	-1.96882	2.34433
SRPK2	-0.514915	5.87389	-3.8601	0.00451944	0.0754952	-2.29474	2.34492
TRA2A	-0.415061	5.96848	-3.86051	0.00451675	0.0754952	-2.30057	2.34517
LRRN4CL	1.98821	-2.00592	3.85792	0.00453371	0.0754984	-1.70732	2.34355
MFAP3	-0.646929	6.26036	-3.85693	0.00454019	0.0755372	-2.31595	2.34293
GLO1	-0.852963	7.92068	-3.85495	0.00455321	0.0756111	-2.41493	2.34168
KANSL3	0.551844	5.93735	3.85488	0.0045537	0.0756111	-2.30011	2.34164
TMEM159	0.680387	3.33003	3.85436	0.00455708	0.0756111	-2.17532	2.34131
CCDC88A	-0.555386	7.12711	-3.85175	0.00457437	0.0757409	-2.37334	2.33967
DLEU2	-1.85022	2.65679	-3.85066	0.00458154	0.0757409	-1.98739	2.33899
ID3	1.21961	6.19088	3.85077	0.00458084	0.0757409	-2.28035	2.33906
OSMR	-0.555789	4.36408	-3.85099	0.00457937	0.0757409	-2.38124	2.33919
MMAB	-1.16109	5.68714	-3.84866	0.00459483	0.0758918	-2.31903	2.33773
DCAF11	0.403647	5.73222	3.84689	0.00460665	0.0760181	-2.27577	2.33661
BCAP29	-0.721479	5.23955	-3.84527	0.00461745	0.0761274	-2.28659	2.3356
GRIA3	0.894973	-1.31858	3.84403	0.00462574	0.0761951	-1.7742	2.33482
HIST1H2BH	-1.81272	6.27826	-3.83688	0.00467393	0.0769192	-2.3672	2.33032
CCL28	1.22704	-2.6947	3.83621	0.00467851	0.0769251	-1.73129	2.32989
STON2	1.6442	1.26949	3.83534	0.0046844	0.0769525	-1.73275	2.32935
CTC-559E9.6	1.45141	-0.125184	3.83461	0.00468935	0.0769646	-1.74941	2.32889
FER1L6	-2.14575	0.746834	-3.83319	0.00469902	0.0770538	-1.88828	2.32799
OSBPL7	0.633415	3.70119	3.83238	0.00470456	0.0770753	-2.09965	2.32748
FAM225A	2.92289	-1.64285	3.82276	0.00477067	0.0779468	-1.8218	2.32142
LAMC1	-1.00232	8.51822	-3.82154	0.00477915	0.0779468	-2.5009	2.32065
METAP2	-0.591364	7.74107	-3.82175	0.00477769	0.0779468	-2.4379	2.32078
NPY1R	2.69947	-4.29314	3.82346	0.00476583	0.0779468	-1.83502	2.32186
PIF1	-1.13193	3.31156	-3.82241	0.00477309	0.0779468	-2.052	2.3212
FAM72B	-0.936957	3.6083	-3.814	0.00483178	0.0785941	-2.11655	2.31589
RNFT2	0.49226	4.95743	3.8146	0.00482755	0.0785941	-2.23036	2.31627
SCXA	-1.47144	-2.14841	-3.81444	0.00482864	0.0785941	-1.79518	2.31617
PNKD	0.548267	5.03749	3.80879	0.00486846	0.07912	-2.25169	2.31261
ANKRD10	0.800584	5.83813	3.80807	0.00487354	0.0791321	-2.32771	2.31216
MRPL47	-0.541926	6.36868	-3.80678	0.00488274	0.0792108	-2.39568	2.31134
TMEM144	1.08366	0.416297	3.80209	0.00491615	0.0796819	-1.87347	2.30837
USP36	0.632412	5.61109	3.80053	0.00492729	0.0797914	-2.3432	2.30739
RP11-385F5.5	1.16095	-0.579906	3.79887	0.0049392	0.0799133	-1.791	2.30634
PLXNA2	-1.92449	6.59762	-3.7963	0.00495772	0.0801417	-2.46275	2.30472
ERBB2	0.757994	1.95276	3.7928	0.00498306	0.0804799	-1.92714	2.3025
CFL1	0.535687	9.70667	3.79012	0.00500251	0.0806799	-2.55934	2.30081
WWTR1	-0.633895	3.79271	-3.78988	0.0050043	0.0806799	-2.3957	2.30066
GPD1	1.49496	-1.31834	3.78764	0.00502064	0.0807922	-1.80348	2.29924
HS2ST1	-1.13727	6.05057	-3.7871	0.00502457	0.0807922	-2.43221	2.2989
SNCG	-1.30942	1.20325	-3.78713	0.00502437	0.0807922	-1.88745	2.29892
OLFML1	-3.12773	-3.43837	-3.78624	0.00503087	0.0808223	-1.82139	2.29836
DYRK1B	-0.92174	4.05273	-3.78487	0.00504095	0.0808706	-2.23075	2.29749
MPI	-0.809627	5.29355	-3.78462	0.00504276	0.0808706	-2.37828	2.29733
MOGS	0.378732	6.52509	3.784	0.0050473	0.0808723	-2.44804	2.29694
LSP1	-1.38032	1.28663	-3.78227	0.00506008	0.0810057	-1.96802	2.29584
AC073934.6	1.9878	-2.70015	3.7781	0.00509092	0.0810663	-1.84734	2.2932
DENND5B	0.595825	6.37997	3.77755	0.00509501	0.0810663	-2.42472	2.29286
DEPDC1	-1.12296	6.19107	-3.77977	0.00507852	0.0810663	-2.4591	2.29426
GABARAPL2	-0.428776	6.146	-3.7784	0.00508871	0.0810663	-2.42954	2.29339
IGLON5	-2.62429	-2.20683	-3.78013	0.00507589	0.0810663	-1.80885	2.29449
IVD	0.686939	6.16521	3.77835	0.00508904	0.0810663	-2.38828	2.29336
SLC26A7	2.26422	-2.20813	3.78009	0.00507616	0.0810663	-1.82721	2.29447
ANKRA2	0.945517	4.13002	3.77599	0.00510661	0.0810831	-2.1903	2.29187
COQ2	-0.577187	3.71103	-3.77561	0.00510942	0.0810831	-2.17368	2.29163
HEXA	0.785776	5.68025	3.77563	0.00510927	0.0810831	-2.37956	2.29164
BMPER	3.36416	-0.698664	3.77396	0.00512174	0.0811372	-1.81171	2.29058
CADM4	-1.13781	2.44218	-3.77426	0.00511951	0.0811372	-2.14181	2.29077
METTL10	-0.849112	2.44471	-3.77272	0.00513105	0.0812142	-2.02993	2.28979
KIAA0247	0.903054	3.45082	3.76969	0.00515378	0.0815031	-2.04392	2.28787
CBX3	-0.541887	8.60424	-3.76757	0.00516971	0.0816133	-2.56596	2.28653
FERMT1	3.15798	-0.765097	3.76795	0.00516686	0.0816133	-1.82063	2.28677
C8G	1.34554	-1.22889	3.76608	0.00518093	0.081649	-1.82165	2.28559
TMTC2	1.16147	5.74979	3.76635	0.00517892	0.081649	-2.41335	2.28576
GNAI2	-0.642314	6.15657	-3.76525	0.00518728	0.0816556	-2.46869	2.28506
RP11-473I1.9	-0.607856	4.87702	-3.76484	0.00519032	0.0816556	-2.33074	2.28481
MMP9	-2.70148	-0.366508	-3.76041	0.00522406	0.0820916	-1.88851	2.28199
RP11-114H23.1	-3.50163	-0.566461	-3.76002	0.00522704	0.0820916	-1.85671	2.28174
CD40	-2.37261	-3.77857	-3.75852	0.00523846	0.0821294	-1.88918	2.2808
SPARCL1	-4.89626	-2.72529	-3.75863	0.0052376	0.0821294	-1.8364	2.28087
EML1	-0.919367	4.45932	-3.75642	0.00525458	0.0822194	-2.32899	2.27946
GS1-18A18.1	2.36402	-2.87824	3.75601	0.00525775	0.0822194	-1.91578	2.2792
NUDT5	-0.74628	6.87415	-3.75708	0.00524949	0.0822194	-2.50881	2.27988
IMPACT	-0.528458	5.65208	-3.75042	0.00530086	0.0826807	-2.46591	2.27565
PDE3B	-0.789111	5.30043	-3.75135	0.00529367	0.0826807	-2.42786	2.27624
RPS7	-0.326507	10.0002	-3.75093	0.00529689	0.0826807	-2.63886	2.27598
GUCY1A3	1.08345	6.01324	3.74559	0.00533838	0.0831947	-2.40544	2.27259
EP300	0.58696	4.49932	3.74279	0.00536031	0.0834651	-2.23058	2.27081
DIAPH3	-1.36822	4.83528	-3.7411	0.00537358	0.0835362	-2.4118	2.26974
HNRNPH1	-0.837223	8.79348	-3.74104	0.00537405	0.0835362	-2.61427	2.2697
ARHGEF40	-0.791825	5.92095	-3.73977	0.00538408	0.0836208	-2.4858	2.26889
LRRN4	0.602411	3.71353	3.73601	0.00541375	0.08401	-2.4987	2.2665
ATL3	1.05826	6.31844	3.7346	0.00542494	0.0840366	-2.50105	2.26561
HIST1H2BO	-1.8994	5.79699	-3.73505	0.00542136	0.0840366	-2.50001	2.26589
NRL	1.23778	0.600353	3.73405	0.0054293	0.0840366	-1.88183	2.26526
ADAM20P1	2.43235	-1.95742	3.7317	0.005448	0.084183	-1.87689	2.26376
TSG101	-0.380385	5.69396	-3.73188	0.0054466	0.084183	-2.49253	2.26387
METAP1	-0.621285	6.10535	-3.73099	0.00545368	0.0841992	-2.50987	2.26331
CCDC6	0.545293	6.03093	3.73007	0.00546105	0.0842417	-2.47791	2.26272
AC009120.6	1.26966	0.358617	3.7267	0.00548804	0.0845149	-1.90375	2.26058
SYBU	0.940798	3.38673	3.72725	0.00548361	0.0845149	-2.04074	2.26093
ZWILCH	-0.728669	6.38061	-3.72604	0.00549337	0.0845255	-2.52462	2.26016
HIST1H2AL	-1.7845	5.48319	-3.72267	0.00552053	0.0848002	-2.49905	2.25802
MYRFL	1.48593	-3.3625	3.72311	0.00551696	0.0848002	-1.88335	2.2583
ETAA1	-0.859732	4.86676	-3.7209	0.00553489	0.0848776	-2.46292	2.25689
KCNQ5-IT1	1.57855	-3.2273	3.72107	0.00553351	0.0848776	-1.90602	2.257
LYRM7	-0.974116	5.80432	-3.71934	0.00554754	0.0850001	-2.49166	2.2559
FAM83D	-1.26736	5.33267	-3.71773	0.00556066	0.0851135	-2.47552	2.25487
SH2B1	0.503596	5.26334	3.71729	0.00556429	0.0851135	-2.44369	2.25459
FNDC7	3.85952	-2.0625	3.71116	0.0056145	0.0858095	-1.93227	2.25069
PRPF40B	-0.720494	3.21529	-3.71002	0.00562395	0.0858819	-2.29084	2.24996
DDX49	0.477381	6.769	3.70508	0.00566486	0.0864342	-2.55673	2.24681
CTA-373H7.7	1.40223	-1.04045	3.70338	0.00567903	0.0865055	-1.90562	2.24573
HIST1H2AH	-1.82447	6.17287	-3.70394	0.00567431	0.0865055	-2.57449	2.24609
MOV10	-0.531444	5.26323	-3.70166	0.00569332	0.0866507	-2.53343	2.24463
VPS25	0.609264	6.10917	3.70011	0.00570636	0.0867767	-2.52159	2.24364
TBC1D23	0.402851	6.0526	3.69919	0.00571408	0.0868216	-2.52777	2.24305
HCN1	-1.22159	6.05926	-3.69664	0.00573553	0.0870024	-2.57261	2.24143
RP11-680F20.6	2.26564	-2.21582	3.6969	0.00573329	0.0870024	-1.93113	2.2416
C14orf2	0.406262	7.49496	3.6953	0.00574683	0.0870326	-2.59361	2.24057
PHLDA1	-1.64633	8.11642	-3.69527	0.00574708	0.0870326	-2.6784	2.24055
KBTBD11	-0.87338	4.05514	-3.69375	0.00575991	0.0871545	-2.27863	2.23958
MLLT4	-0.916209	6.02579	-3.69287	0.00576739	0.0871953	-2.55106	2.23902
MTL5	-1.99123	-0.331242	-3.69145	0.00577939	0.0873042	-1.94618	2.23812
COL6A3	-1.06964	2.90411	-3.68993	0.00579235	0.0874275	-2.26312	2.23715
CATSPER2	1.1421	1.24357	3.68828	0.00580636	0.087494	-1.97352	2.2361
P2RY6	-3.55137	2.04678	-3.68838	0.00580555	0.087494	-2.07826	2.23616
HIST1H2AK	-1.59469	4.05308	-3.6873	0.00581479	0.0875487	-2.41571	2.23547
CAPN7	0.451725	4.87877	3.68413	0.00584192	0.087812	-2.4215	2.23344
TMEM52	-1.1666	-0.617205	-3.68424	0.00584096	0.087812	-1.98055	2.23352
HK2	-1.19428	6.85765	-3.68229	0.00585776	0.0878914	-2.62998	2.23227
HMBS	-0.659304	4.11843	-3.68289	0.0058526	0.0878914	-2.40144	2.23265
RP11-346D6.6	-1.45364	-1.22841	-3.68184	0.00586168	0.0878914	-1.99019	2.23198
C17orf76-AS1	0.645063	8.9615	3.67752	0.00589903	0.0883061	-2.68066	2.22922
NEDD9	2.28483	-0.22067	3.67803	0.00589461	0.0883061	-1.9368	2.22954
BIN1	-1.08677	5.41581	-3.67345	0.00593445	0.0887635	-2.55845	2.22662
ELMO2	0.463749	5.56661	3.67146	0.00595191	0.0888786	-2.54046	2.22534
ITGAV	-0.741879	8.82914	-3.67198	0.00594737	0.0888786	-2.74078	2.22568
INTS10	0.546251	6.47281	3.66969	0.00596739	0.0890368	-2.58477	2.22422
HAND2	-0.571766	8.83417	-3.6685	0.00597788	0.0890856	-2.72674	2.22345
NOL9	-0.410389	5.33659	-3.66821	0.00598044	0.0890856	-2.53713	2.22327
PLXNC1	-0.912146	3.00858	-3.66753	0.00598642	0.0891019	-2.36431	2.22283
ESRRG	-0.573138	4.13821	-3.66639	0.00599648	0.0891787	-2.25709	2.2221
BTF3	-0.830344	8.83229	-3.66332	0.00602371	0.0895105	-2.73141	2.22014
ATP1B1	1.43872	6.81397	3.65793	0.00607175	0.0900869	-2.53543	2.21669
KNOP1	-0.784496	6.20163	-3.65694	0.00608059	0.0900869	-2.63754	2.21605
MZT1	-0.820278	6.28084	-3.65734	0.00607697	0.0900869	-2.62822	2.21631
NUDT9	-0.551617	4.78247	-3.65675	0.00608228	0.0900869	-2.48226	2.21593
CELSR1	2.88616	-3.17124	3.65444	0.00610305	0.0902758	-2.02446	2.21445
KIF16B	-0.570325	3.85588	-3.65423	0.00610494	0.0902758	-2.45398	2.21432
FNBP1L	-1.10731	6.37066	-3.65256	0.00612	0.0904148	-2.65875	2.21325
ZSWIM4	-0.661692	3.47744	-3.65209	0.00612427	0.0904148	-2.38216	2.21295
C15orf38	-0.701222	2.71987	-3.6483	0.0061586	0.0905611	-2.31446	2.21052
C3orf67	-0.634774	2.31265	-3.64777	0.0061634	0.0905611	-2.2209	2.21018
GRIA4	0.738929	4.99581	3.64977	0.00614522	0.0905611	-2.31656	2.21146
ID4	-0.970286	0.861951	-3.64841	0.00615756	0.0905611	-2.04213	2.21059
KCNV1	2.01995	-1.72799	3.64716	0.00616897	0.0905611	-1.99354	2.20979
PKP2	1.2214	2.62783	3.64949	0.00614781	0.0905611	-2.23666	2.21128
PLBD2	0.788898	3.62923	3.64734	0.00616731	0.0905611	-2.28578	2.2099
EPDR1	1.02612	4.88552	3.644	0.00619781	0.0907281	-2.55276	2.20776
GPALPP1	-1.25668	5.17961	-3.64373	0.00620027	0.0907281	-2.60121	2.20759
TMEM150A	0.910502	2.82269	3.64432	0.00619486	0.0907281	-2.21825	2.20797
TMEM204	-0.723912	3.79137	-3.64443	0.00619387	0.0907281	-2.39243	2.20804
CCPG1	-0.797748	2.53432	-3.64255	0.0062111	0.0907307	-2.20971	2.20683
FAM124B	-3.21876	-1.1312	-3.64208	0.00621539	0.0907307	-1.9863	2.20653
PDZRN3	0.849447	5.64534	3.64219	0.0062144	0.0907307	-2.59246	2.2066
FGF10	1.67658	-1.21263	3.6405	0.0062299	0.0908698	-1.99321	2.20552
AIFM3	-1.37952	-2.82399	-3.63961	0.00623806	0.0909159	-1.98704	2.20495
PNISR	-0.593628	6.24439	-3.63885	0.00624506	0.0909452	-2.65047	2.20446
SUN2	-1.11547	5.17957	-3.6368	0.006264	0.0911482	-2.54833	2.20315
AC034220.3	2.34138	-0.92035	3.63512	0.00627959	0.0911566	-1.99122	2.20207
GPR39	-2.84227	-1.48291	-3.63545	0.00627658	0.0911566	-2.0553	2.20228
PHLPP2	0.529446	4.81073	3.6357	0.00627425	0.0911566	-2.51598	2.20244
CPSF1	-0.449837	5.69806	-3.63089	0.00631899	0.0916556	-2.6591	2.19935
SLC39A7	0.356861	7.24157	3.62969	0.00633015	0.0917443	-2.69523	2.19859
SDCCAG3	-0.791194	6.37257	-3.62908	0.00633589	0.0917545	-2.68012	2.19819
NAALAD2	1.03217	2.35697	3.62735	0.00635213	0.0919167	-2.11119	2.19708
SLITRK1	1.9143	-0.347025	3.6266	0.00635915	0.0919452	-2.00366	2.1966
CNRIP1	0.53775	5.75829	3.62547	0.00636977	0.0919881	-2.61741	2.19588
HEY1	-1.19973	5.34054	-3.62521	0.00637222	0.0919881	-2.56161	2.19571
CTC-558O2.2	-3.36515	-2.94538	-3.61985	0.00642295	0.0925738	-2.01046	2.19227
RALBP1	-0.962033	6.24672	-3.61991	0.00642243	0.0925738	-2.70532	2.1923
PRH2	2.26636	-4.00186	3.6187	0.0064339	0.0926545	-2.06321	2.19153
WWP2	0.444694	5.26944	3.6182	0.00643872	0.0926545	-2.61097	2.1912
ACSS2	-1.3284	4.85576	-3.6163	0.00645684	0.0927057	-2.6137	2.18998
CSF2	-2.55581	-3.06309	-3.61622	0.00645754	0.0927057	-2.03025	2.18993
VEGFB	-0.493954	4.57414	-3.61715	0.00644864	0.0927057	-2.62625	2.19053
ARL5A	-1.84998	5.80357	-3.61505	0.00646877	0.0927938	-2.70884	2.18918
MFSD1	-0.512737	5.39926	-3.61399	0.00647888	0.0927963	-2.63627	2.1885
NUDT11	0.990395	2.05345	3.61397	0.00647914	0.0927963	-2.04328	2.18848
PPM1K	-0.45998	4.21135	-3.61189	0.00649905	0.0928939	-2.57282	2.18715
RHPN1	-1.35023	1.82127	-3.61195	0.00649854	0.0928939	-2.30983	2.18718
USP1	-0.687743	6.77248	-3.61167	0.00650125	0.0928939	-2.73779	2.187
SEC61A1	0.344492	8.60167	3.6107	0.00651054	0.0929538	-2.78964	2.18638
EPB41L3	0.482582	4.34941	3.61002	0.0065171	0.0929745	-2.69941	2.18595
ASAH2B	0.610006	4.12456	3.60912	0.00652581	0.0929869	-2.4665	2.18537
POLI	0.565934	4.22902	3.60835	0.00653327	0.0929869	-2.53005	2.18487
UNC79	1.3136	3.06689	3.60873	0.00652952	0.0929869	-2.10559	2.18512
HIST1H3F	-1.86805	6.06001	-3.60662	0.00654998	0.0929939	-2.70513	2.18376
RABEP2	0.598791	3.84969	3.60619	0.00655419	0.0929939	-2.42446	2.18348
TMEM156	-3.39947	-0.205096	-3.60649	0.00655131	0.0929939	-2.22485	2.18367
TREX1	0.876041	1.93532	3.60706	0.00654573	0.0929939	-2.13773	2.18404
C21orf90	2.30372	-2.11959	3.6047	0.00656867	0.0930861	-2.07551	2.18252
OTUD1	0.961794	2.08728	3.60447	0.00657091	0.0930861	-2.28957	2.18237
HNRNPL	-0.837268	7.59408	-3.60383	0.00657716	0.0931023	-2.77121	2.18196
TXNL4B	0.644093	4.91738	3.60216	0.00659342	0.0931878	-2.58884	2.18089
ZNF211	0.421085	4.74088	3.60248	0.00659031	0.0931878	-2.55405	2.18109
CCNB3	-1.30046	-0.562056	-3.60023	0.00661232	0.0933823	-2.05631	2.17965
ABL1	0.356629	6.84098	3.59813	0.0066329	0.0934986	-2.72744	2.1783
CD47	-0.776013	7.44937	-3.5973	0.00664108	0.0934986	-2.77116	2.17776
IGFBP4	1.08418	6.67791	3.59751	0.00663898	0.0934986	-2.70287	2.1779
RIC3	0.676346	2.80324	3.59872	0.00662713	0.0934986	-2.27906	2.17867
HAUS5	-0.976603	3.44872	-3.59601	0.00665384	0.0934996	-2.46612	2.17693
IL7	-0.81546	2.6938	-3.59573	0.00665655	0.0934996	-2.36645	2.17675
TNFRSF8	2.60956	-2.92259	3.5964	0.00664994	0.0934996	-2.08226	2.17718
NUCKS1	-2.02333	8.65272	-3.59504	0.00666341	0.0935239	-2.8588	2.1763
ADAMTS2	-0.584202	3.00137	-3.59248	0.00668874	0.0935542	-2.36448	2.17466
DNALI1	-0.505724	3.19263	-3.59361	0.00667755	0.0935542	-2.53119	2.17538
GTSE1	-1.17361	4.38796	-3.59223	0.00669125	0.0935542	-2.53609	2.17449
MYH10	-0.915587	7.02493	-3.5935	0.00667863	0.0935542	-2.76501	2.17531
RP1-137D17.2	2.06378	-4.1371	3.59302	0.00668332	0.0935542	-2.0954	2.17501
ZBTB9	0.403229	4.88461	3.59136	0.00669985	0.0936026	-2.61649	2.17394
GYLTL1B	-1.08563	0.420814	-3.58959	0.00671747	0.093762	-2.20528	2.17279
NDUFA2	0.628477	6.10305	3.58918	0.00672155	0.093762	-2.68783	2.17253
NR4A3	2.35688	1.09983	3.58836	0.00672968	0.0938036	-2.10276	2.17201
CTB-55O6.10	2.21066	-3.94676	3.58448	0.00676856	0.0939755	-2.10366	2.1695
FOXK1	0.435536	6.97287	3.58629	0.00675044	0.0939755	-2.75404	2.17067
HIST2H3D	-1.66596	5.97701	-3.58559	0.00675745	0.0939755	-2.75014	2.17022
NAA60	0.448077	5.282	3.58376	0.00677577	0.0939755	-2.62513	2.16904
NIPSNAP3A	0.65085	4.59837	3.58353	0.00677812	0.0939755	-2.59073	2.16889
PDGFRL	1.68897	2.17699	3.58426	0.00677074	0.0939755	-2.18335	2.16936
SCYL3	0.475929	4.75448	3.58553	0.00675803	0.0939755	-2.61059	2.17018
FOXL1	-2.95221	-1.86785	-3.58297	0.00678373	0.09398	-2.10553	2.16853
GDAP2	0.473508	6.08394	3.58094	0.00680423	0.09398	-2.72429	2.16722
SLC38A2	0.397429	8.95533	3.58102	0.0068034	0.09398	-2.86357	2.16727
ZBTB43	0.508369	5.34537	3.58156	0.00679797	0.09398	-2.65049	2.16762
ZNF446	0.519709	3.96866	3.58197	0.00679384	0.09398	-2.4797	2.16789
FAM179A	1.37691	-1.09771	3.57993	0.00681445	0.0940498	-2.06773	2.16657
GOLIM4	-0.465996	7.13876	-3.57676	0.00684664	0.094351	-2.77924	2.16452
RP11-343N15.5	-1.2181	3.54696	-3.57689	0.00684527	0.094351	-2.52134	2.16461
BAZ1A	-0.525129	7.62533	-3.56667	0.00695004	0.0948986	-2.82996	2.15801
CENPE	-1.41757	6.72182	-3.5686	0.00693009	0.0948986	-2.81258	2.15926
CUEDC1	-0.557486	3.90187	-3.56391	0.00697855	0.0948986	-2.56725	2.15623
DIP2B	0.413319	6.4064	3.56495	0.0069678	0.0948986	-2.73413	2.1569
FAM72C	-0.999969	1.5509	-3.56357	0.00698214	0.0948986	-2.24432	2.15601
GLT8D2	1.72911	0.352407	3.57054	0.00691014	0.0948986	-2.10649	2.16051
KAT2A	0.472891	5.27373	3.56705	0.00694613	0.0948986	-2.65388	2.15826
LRRC23	-0.690606	2.42061	-3.56979	0.00691791	0.0948986	-2.38052	2.16003
MEG8	-2.49482	2.61806	-3.56532	0.00696401	0.0948986	-2.30276	2.15714
NHLRC2	-0.449552	5.94859	-3.56639	0.00695287	0.0948986	-2.75505	2.15784
NPPA	2.73128	-2.57973	3.56977	0.00691804	0.0948986	-2.12389	2.16002
P4HA1	-0.556716	6.87127	-3.56442	0.00697327	0.0948986	-2.80445	2.15656
RP11-347C12.1	0.94549	0.884348	3.57197	0.00689545	0.0948986	-2.1409	2.16144
RP11-379F4.4	1.23307	-0.587435	3.56561	0.006961	0.0948986	-2.09235	2.15733
RP11-459K23.2	-1.96544	-2.63231	-3.56822	0.006934	0.0948986	-2.07817	2.15902
TBC1D3H	1.46454	-1.01798	3.56717	0.00694484	0.0948986	-2.09321	2.15834
TIMP3	-1.94234	3.66236	-3.56335	0.00698438	0.0948986	-2.44418	2.15587
TMEM126A	-0.885176	3.8543	-3.56306	0.00698736	0.0948986	-2.48539	2.15569
UBB	-0.398722	8.80035	-3.57154	0.0068999	0.0948986	-2.8643	2.16116
ZCCHC12	1.53239	0.171021	3.56276	0.00699056	0.0948986	-2.09399	2.15549
MOAP1	0.811278	6.13931	3.56098	0.00700903	0.0950786	-2.70145	2.15434
ANKDD1A	-0.674805	2.16218	-3.55917	0.00702791	0.0951929	-2.30404	2.15317
RP4-625H18.2	1.79381	-2.25199	3.5592	0.00702761	0.0951929	-2.09406	2.15319
PRAF2	0.76632	2.94014	3.5566	0.00705483	0.0954866	-2.33492	2.15151
FSCN1	-1.34669	8.91188	-3.55549	0.00706651	0.0955736	-2.92239	2.1508
SLC35F5	0.638195	6.12332	3.55482	0.00707354	0.0955977	-2.75422	2.15036
CECR6	1.4281	0.425803	3.55142	0.00710951	0.0957996	-2.11683	2.14816
NSF	0.479603	6.72094	3.5519	0.0071044	0.0957996	-2.77781	2.14847
RP11-367J11.2	2.27204	-4.39378	3.55162	0.00710736	0.0957996	-2.15052	2.14829
WASL	-0.623734	5.97936	-3.55144	0.00710927	0.0957996	-2.7778	2.14818
HIST2H2AA4	-1.39846	6.62927	-3.55091	0.00711484	0.0958005	-2.82993	2.14784
C8orf49	-1.21576	-0.120903	-3.55034	0.00712092	0.0958116	-2.16812	2.14746
DYNLL1-AS1	-1.06378	2.85391	-3.54938	0.00713112	0.095878	-2.45254	2.14684
FAM211A	0.996021	-0.298533	3.54705	0.00715588	0.0959998	-2.15846	2.14534
INPP4A	-0.601903	5.00678	-3.54704	0.00715599	0.0959998	-2.70672	2.14533
INTS8	-0.68316	6.09112	-3.54777	0.00714816	0.0959998	-2.78583	2.14581
ABHD4	0.92258	2.05389	3.54314	0.00719763	0.0962589	-2.33935	2.14281
HIST1H2AE	-1.61459	6.7161	-3.54227	0.007207	0.0962589	-2.8455	2.14225
PIM1	1.02842	3.94863	3.54272	0.00720219	0.0962589	-2.47548	2.14254
POLR1E	-0.615727	5.4725	-3.54262	0.00720323	0.0962589	-2.7782	2.14247
RP11-194N12.2	2.20759	-4.16294	3.54239	0.00720566	0.0962589	-2.16157	2.14233
UBE2K	-0.458148	6.78128	-3.54239	0.00720568	0.0962589	-2.81766	2.14232
BRCA1	-0.697637	5.75651	-3.54176	0.00721249	0.0962616	-2.78639	2.14191
MCM6	-0.840558	6.16318	-3.53833	0.00724945	0.0966134	-2.81473	2.13969
TMEM176B	-1.58955	3.59249	-3.53881	0.00724419	0.0966134	-2.72903	2.14001
TMX2	0.384695	7.03794	3.53774	0.00725574	0.0966266	-2.83972	2.13932
APBA3	-0.512355	3.31649	-3.53021	0.00733774	0.097394	-2.52743	2.13444
GSN	-0.807558	3.64249	-3.52755	0.00736683	0.097394	-2.63949	2.13272
HECW1	2.24732	-3.60499	3.52874	0.00735382	0.097394	-2.14443	2.13349
IGFBP7	-1.57819	2.59954	-3.53039	0.00733574	0.097394	-2.35083	2.13456
KDELR3	-1.51106	1.99514	-3.52814	0.00736042	0.097394	-2.41465	2.1331
RAB27A	-0.697682	3.74369	-3.52914	0.00734943	0.097394	-2.63438	2.13375
SLC30A6	0.566835	6.72764	3.52881	0.00735306	0.097394	-2.83301	2.13353
SSH2	-0.922268	5.33342	-3.53016	0.00733829	0.097394	-2.75792	2.1344
TK2	0.62548	4.1145	3.5279	0.00736302	0.097394	-2.59353	2.13294
ZNF664	-0.614124	8.2053	-3.5289	0.00735202	0.097394	-2.92096	2.13359
SHC4	1.5428	1.79105	3.5269	0.00737402	0.0974183	-2.25077	2.1323
ACVRL1	-3.64812	-0.777802	-3.52585	0.00738559	0.0974299	-2.14362	2.13161
PDK1	-1.44922	4.32036	-3.52629	0.00738075	0.0974299	-2.71569	2.1319
CTNS	0.630087	3.25488	3.52499	0.00739511	0.0974849	-2.46823	2.13106
AC007128.1	3.29573	-2.91509	3.52373	0.00740897	0.097597	-2.17246	2.13024
PCDHA12	1.82799	-0.858978	3.52273	0.00742007	0.0976726	-2.13958	2.12959
HIST1H2BJ	-1.94074	5.87328	-3.52155	0.00743308	0.0977027	-2.83458	2.12883
MYO3B	-1.6428	-1.18239	-3.52196	0.00742856	0.0977027	-2.14245	2.1291
BLVRA	-0.567949	5.40629	-3.51911	0.00746024	0.0979	-2.79461	2.12725
ERC1	-0.377959	5.80574	-3.51827	0.00746959	0.0979	-2.81099	2.1267
HIST1H2BM	-1.54873	5.85274	-3.51958	0.00745504	0.0979	-2.83602	2.12755
HNRNPK	-0.564243	9.46208	-3.51859	0.00746607	0.0979	-2.98501	2.12691
C9orf91	0.655124	4.10739	3.51266	0.00753247	0.0983984	-2.53376	2.12306
CTD-2006C1.2	0.687749	3.48994	3.51382	0.00751939	0.0983984	-2.45067	2.12382
HIST1H1B	-1.62632	7.8196	-3.51294	0.00752925	0.0983984	-2.94561	2.12325
NCAPD2	-1.04594	7.06094	-3.51398	0.0075176	0.0983984	-2.88711	2.12392
RP11-67H24.2	1.78804	-4.06167	3.51198	0.00754003	0.0983984	-2.16752	2.12263
UPF1	0.368281	6.82414	3.51211	0.00753863	0.0983984	-2.86184	2.12271
BTBD19	-1.6638	0.597025	-3.50961	0.00756677	0.0986767	-2.33752	2.12109
6-Sep	-1.22522	7.02505	-3.50647	0.00760243	0.0987724	-2.87243	2.11905
FMN2	1.19003	1.18673	3.50599	0.00760787	0.0987724	-2.26139	2.11874
LRRC45	-0.966264	4.26614	-3.50554	0.00761297	0.0987724	-2.77436	2.11845
PRPF39	0.438261	5.4215	3.50514	0.00761748	0.0987724	-2.77417	2.11819
RP3-410C9.2	1.99268	-2.46404	3.50625	0.00760491	0.0987724	-2.16591	2.11891
SLC35G5	1.53547	-1.89257	3.50828	0.00758189	0.0987724	-2.15522	2.12022
TCF7	-1.13728	1.04446	-3.50572	0.00761095	0.0987724	-2.25499	2.11856
UBXN6	0.403672	6.02256	3.50591	0.00760878	0.0987724	-2.8275	2.11868
DUSP6	-2.34803	6.7681	-3.50413	0.00762902	0.0988518	-2.93676	2.11753
HS6ST3	1.786	0.384429	3.50338	0.00763753	0.0988916	-2.16112	2.11705
ACOT2	0.488925	4.18006	3.4981	0.00769813	0.0990433	-2.59725	2.11361
C9orf153	-2.24152	-3.19116	-3.4969	0.00771191	0.0990433	-2.16953	2.11284
EFCAB12	-1.34789	-2.67159	-3.49574	0.00772536	0.0990433	-2.17196	2.11208
HIST1H3G	-2.12992	5.34066	-3.49603	0.007722	0.0990433	-2.8062	2.11227
KLHL15	0.934183	5.41017	3.49852	0.00769325	0.0990433	-2.72757	2.11389
MORN2	-1.42312	3.97322	-3.50044	0.00767119	0.0990433	-2.7118	2.11514
MRPS25	0.464459	5.20937	3.49986	0.00767787	0.0990433	-2.72421	2.11476
PPP1R36	2.67784	-1.98512	3.49612	0.00772096	0.0990433	-2.18781	2.11233
RGS9	-2.53918	0.783256	-3.49674	0.00771376	0.0990433	-2.31208	2.11273
RP11-66B24.7	-1.33098	-1.81094	-3.49997	0.00767655	0.0990433	-2.17909	2.11483
RP4-794H19.1	-2.34123	-3.79121	-3.50006	0.00767558	0.0990433	-2.16806	2.11489
SDHAF1	0.645532	3.77101	3.49613	0.00772084	0.0990433	-2.51696	2.11234
SEC23IP	-0.397898	6.41749	-3.49677	0.00771339	0.0990433	-2.88459	2.11275
ZNF638	-0.604927	7.01928	-3.50101	0.0076647	0.0990433	-2.91392	2.1155
MAN2A2	0.633741	5.02415	3.49405	0.00774489	0.099224	-2.72147	2.11098
PCSK1N	0.783202	3.79365	3.49311	0.00775577	0.0992935	-2.43491	2.11038
CATSPERG	1.52119	-1.38715	3.49108	0.00777936	0.0993956	-2.18523	2.10906
CEP41	-0.400988	5.00131	-3.48988	0.00779338	0.0993956	-2.76771	2.10827
FAM171A2	-0.754108	4.09555	-3.49084	0.0077821	0.0993956	-2.7053	2.1089
PRDX5	-0.416722	6.76988	-3.48961	0.00779648	0.0993956	-2.91826	2.1081
SLC6A13	2.4434	-3.57059	3.48991	0.00779303	0.0993956	-2.21281	2.10829
TRIM52	1.12782	3.54394	3.49008	0.00779102	0.0993956	-2.45546	2.10841
C6orf223	-3.27999	-2.14538	-3.48804	0.00781479	0.0995593	-2.19045	2.10708
F3	-0.817931	1.7927	-3.48215	0.00788405	0.0997107	-2.47128	2.10325
GAS5	0.617461	8.76831	3.48229	0.00788244	0.0997107	-2.99491	2.10334
GPR135	0.906198	1.6516	3.48567	0.00784266	0.0997107	-2.31712	2.10554
KANSL2	0.453652	5.61965	3.48519	0.00784818	0.0997107	-2.7937	2.10523
MRE11A	-0.493917	4.09781	-3.48213	0.00788432	0.0997107	-2.61219	2.10324
PITX2	2.62077	-3.11139	3.48483	0.0078525	0.0997107	-2.21728	2.10499
PLEKHM1	0.569919	4.40485	3.48191	0.00788688	0.0997107	-2.70394	2.1031
RP11-274B21.9	2.70139	-3.78785	3.48441	0.00785741	0.0997107	-2.21711	2.10472
RP11-77H9.2	1.63794	0.713683	3.48197	0.00788613	0.0997107	-2.24566	2.10314
SERTAD4-AS1	1.61514	0.877227	3.48524	0.0078477	0.0997107	-2.28309	2.10526
SLC22A17	-0.579539	4.4491	-3.48238	0.00788138	0.0997107	-2.74935	2.1034
SH3PXD2A	-1.22919	4.35879	-3.47935	0.00791713	0.100024	-2.68523	2.10143
POLH	-0.650328	4.00716	-3.47772	0.00793655	0.100061	-2.67199	2.10037
RP11-35G9.3	-0.818565	0.389672	-3.47851	0.00792716	0.100061	-2.29831	2.10088
ZNF215	0.932318	0.786085	3.4779	0.00793432	0.100061	-2.3076	2.10049
RP1-30M3.5	-1.55212	-1.76811	-3.47488	0.00797039	0.100418	-2.2071	2.09852
FAR2	-1.21434	5.97442	-3.47303	0.00799253	0.100627	-2.87384	2.09732
ATAD5	-1.03213	3.60357	-3.47064	0.00802118	0.10071	-2.65818	2.09576
FAM84B	-0.845975	3.97503	-3.47067	0.00802086	0.10071	-2.90079	2.09578
FZD8	2.66709	0.871674	3.47157	0.00801	0.10071	-2.27983	2.09637
PELI2	-1.61055	3.74976	-3.47071	0.00802028	0.10071	-2.67994	2.09581
ARHGEF39	-0.861881	2.9133	-3.46852	0.00804671	0.100926	-2.57391	2.09438
TBX3	0.73317	6.81049	3.46829	0.00804948	0.100926	-2.90559	2.09423
ZNF570	0.527314	3.89461	3.46776	0.00805587	0.100937	-2.63336	2.09389
ZNF256	0.549619	3.60605	3.46708	0.00806407	0.10097	-2.57595	2.09345
ANK2	-0.872182	6.03177	-3.46418	0.00809918	0.10127	-2.86992	2.09156
MIF4GD	0.463849	4.14846	3.46428	0.00809797	0.10127	-2.69975	2.09162
TXNIP	1.48344	7.06342	3.46317	0.00811147	0.101354	-2.92229	2.0909
EPC2	-0.39046	5.20136	-3.46207	0.00812487	0.101452	-2.87479	2.09018
HEG1	0.42286	5.66063	3.45989	0.00815149	0.101645	-2.89755	2.08876
RP4-756H11.3	1.52763	-1.30646	3.46016	0.00814817	0.101645	-2.21801	2.08894
CUTA	0.694369	6.9189	3.45941	0.00815736	0.101649	-2.93836	2.08845
ALDH9A1	0.332518	6.42234	3.45711	0.00818564	0.101792	-2.93552	2.08695
HERC5	-0.531907	1.82194	-3.45737	0.00818232	0.101792	-2.82311	2.08712
MT-CO2	0.933567	10.0287	3.45795	0.00817528	0.101792	-3.08792	2.0875
PPIP5K1	0.656889	4.71037	3.45585	0.00820101	0.101845	-2.68614	2.08613
PTDSS2	-0.4192	4.77382	-3.45587	0.0082008	0.101845	-2.80485	2.08614
FAM72D	-0.832906	3.95127	-3.45419	0.00822158	0.102031	-2.70651	2.08504
C4orf48	-0.62368	2.9484	-3.45273	0.00823957	0.102058	-2.51489	2.0841
CGGBP1	-0.351661	7.16569	-3.4518	0.00825106	0.102058	-2.98127	2.08349
CLSPN	-1.90318	4.41483	-3.45225	0.00824547	0.102058	-2.86049	2.08378
KCTD21	-0.682613	2.04938	-3.45275	0.00823925	0.102058	-2.43282	2.08411
MAP3K5	1.23158	2.79195	3.45174	0.00825177	0.102058	-2.41987	2.08345
CTC-459F4.1	1.20222	0.35346	3.45005	0.00827273	0.102247	-2.30166	2.08235
PREB	-1.0218	5.33976	-3.44949	0.0082797	0.102264	-2.88699	2.08199
LINC00680	0.908795	3.97735	3.44676	0.00831377	0.102615	-2.64406	2.0802
AHSA2	0.44571	4.46769	3.44564	0.00832778	0.102719	-2.82953	2.07947
RP11-439E19.3	2.07378	-0.877132	3.44389	0.00834972	0.10286	-2.24869	2.07833
WTIP	2.06742	-0.000640024	3.44337	0.00835616	0.10286	-2.29268	2.07799
ZNF468	0.629864	3.39065	3.44378	0.00835104	0.10286	-2.55311	2.07826
COX14	0.830972	4.5988	3.44253	0.00836677	0.102921	-2.71465	2.07744
FRAS1	1.51297	5.65503	3.44105	0.0083854	0.103055	-2.75933	2.07648
PCDH10	1.93321	5.94505	3.44076	0.008389	0.103055	-2.8302	2.07629
OASL	-1.94703	-3.25218	-3.43931	0.00840726	0.10321	-2.24812	2.07535
HMGA2	-0.992619	1.46418	-3.43728	0.00843304	0.103387	-2.88785	2.07402
IFT140	-0.565596	4.26303	-3.43763	0.00842856	0.103387	-2.80211	2.07425
SLC2A12	-2.04928	-0.529623	-3.4368	0.00843904	0.103391	-2.33408	2.07371
FAM167A	-0.951103	5.19831	-3.43467	0.00846621	0.103517	-2.83787	2.07231
TMOD3	-0.336148	6.8486	-3.43465	0.00846638	0.103517	-2.99738	2.0723
TNFSF4	1.32008	0.600527	3.43534	0.00845767	0.103517	-2.31812	2.07275
CRIPAK	0.70601	1.54147	3.43397	0.00847501	0.103553	-2.43344	2.07186
C16orf13	-0.383387	5.03078	-3.43105	0.00851232	0.1038	-2.89127	2.06995
CEP112	-0.989056	2.27479	-3.43127	0.00850952	0.1038	-2.68226	2.07009
MVP	-0.91011	4.42334	-3.4312	0.00851049	0.1038	-2.9661	2.07005
DGCR14	0.554187	4.62443	3.42923	0.00853563	0.10396	-2.77386	2.06876
FGFRL1	-1.93795	-1.71806	-3.42869	0.00854257	0.10396	-2.30426	2.06841
LRRC15	1.82564	-1.67189	3.42881	0.00854106	0.10396	-2.28259	2.06849
EVC2	-0.573299	-0.302038	-3.42797	0.00855183	0.103971	-2.5714	2.06794
TMEM87B	-0.466981	5.69875	-3.42774	0.00855487	0.103971	-2.96811	2.06779
ARHGAP4	-0.600412	4.88363	-3.42688	0.00856589	0.104036	-2.92947	2.06723
AHNAK2	0.832474	4.01287	3.42527	0.00858668	0.104043	-2.79415	2.06617
C2orf43	-1.38237	5.43306	-3.42505	0.00858956	0.104043	-2.93631	2.06603
CTCF	-0.423518	6.41975	-3.42574	0.00858058	0.104043	-2.98475	2.06648
HIST1H2AD	-1.63978	6.13018	-3.42633	0.008573	0.104043	-2.99088	2.06687
WDR89	-0.471235	5.07601	-3.42462	0.00859506	0.104043	-2.88829	2.06575
CHCHD4	-0.845143	3.56283	-3.42128	0.00863839	0.104498	-2.68952	2.06357
CTD-2323K18.1	-1.43362	-2.38099	-3.41966	0.00865948	0.104684	-2.27103	2.06251
PLEKHG5	-0.708893	2.41505	-3.4184	0.00867587	0.104812	-2.56719	2.06169
TMEM209	0.548459	6.09641	3.41795	0.00868182	0.104815	-2.95858	2.06139
MKL2	-0.662218	3.99004	-3.4159	0.00870864	0.10498	-2.77146	2.06005
OFD1	0.438844	4.79049	3.41558	0.00871279	0.10498	-2.83498	2.05984
PCBP3	-0.692321	4.17446	-3.41605	0.00870662	0.10498	-2.77563	2.06015
LRAT	1.56157	-1.21036	3.41374	0.00873703	0.105202	-2.29623	2.05864
LRRC57	0.800809	4.79627	3.41152	0.00876622	0.105372	-2.7809	2.05719
QTRTD1	0.482723	6.36745	3.41135	0.00876846	0.105372	-2.98483	2.05708
RBM4	0.680505	3.03161	3.41201	0.00875978	0.105372	-2.51546	2.05751
CD2BP2	0.523614	7.00195	3.4099	0.00878774	0.10547	-3.02981	2.05612
FBXW5	-0.460568	6.128	-3.4095	0.00879296	0.10547	-2.99213	2.05586
RSL24D1	-0.330276	7.94687	-3.40942	0.00879399	0.10547	-3.08124	2.05581
DNAJC25	0.947193	4.14866	3.40632	0.00883526	0.105895	-2.72851	2.05378
EFHC2	-1.74294	-0.867176	-3.4034	0.00887418	0.106246	-2.30198	2.05187
TNFRSF4	-3.26643	-3.39347	-3.40325	0.00887618	0.106246	-2.29136	2.05177
NBPF14	0.441911	4.67485	3.40211	0.00889143	0.106289	-2.9283	2.05103
PIGK	-0.331481	5.63289	-3.40255	0.0088856	0.106289	-3.00313	2.05131
C20orf112	-0.557664	5.42979	-3.39844	0.00894072	0.106458	-2.9738	2.04863
POLR2H	-0.77473	6.03498	-3.39886	0.00893516	0.106458	-3.01823	2.0489
SCRT1	2.40494	-0.712625	3.40021	0.00891696	0.106458	-2.31366	2.04978
SVEP1	1.64729	1.89481	3.39807	0.00894572	0.106458	-2.69597	2.04838
TBC1D3G	1.43895	-1.31617	3.39906	0.00893243	0.106458	-2.31682	2.04903
THSD4	-1.43435	4.37707	-3.39802	0.00894646	0.106458	-2.99877	2.04835
TJP1	-0.404996	6.55058	-3.39915	0.00893119	0.106458	-3.05359	2.04909
CCDC71	-0.478097	3.83279	-3.39486	0.00898916	0.106551	-2.76981	2.04628
HHIPL2	1.5701	-1.96475	3.39516	0.00898511	0.106551	-2.30313	2.04648
HOXD-AS1	-0.698352	2.57963	-3.39576	0.00897698	0.106551	-2.61289	2.04687
NBL1	-0.809304	2.6618	-3.39417	0.0089985	0.106551	-2.71152	2.04583
NEUROG2	-1.80238	0.663874	-3.39355	0.00900691	0.106551	-2.72278	2.04542
PCNXL3	0.410036	5.53663	3.39631	0.00896957	0.106551	-2.98964	2.04723
RP11-281P23.2	-2.2109	-3.42745	-3.39378	0.00900378	0.106551	-2.3169	2.04558
SYNE3	-1.38075	2.37894	-3.39504	0.0089867	0.106551	-2.6114	2.0464
ZADH2	-0.871126	5.85777	-3.39397	0.00900131	0.106551	-3.03565	2.04569
NAP1L3	1.53763	2.95414	3.39243	0.00902214	0.106661	-2.48905	2.04469
STAT1	-0.337101	7.02616	-3.39143	0.00903575	0.106753	-3.0758	2.04404
ATE1	-0.730182	5.64632	-3.38975	0.00905873	0.106947	-3.00636	2.04293
SLC33A1	0.612927	6.63874	3.38937	0.00906389	0.106947	-3.02409	2.04269
CCDC92	-1.21209	3.50894	-3.38735	0.00909158	0.107135	-2.80734	2.04136
TST	-0.667105	3.51373	-3.38745	0.00909027	0.107135	-2.76006	2.04142
PDE1A	1.5813	-0.298915	3.38513	0.00912214	0.107311	-2.41285	2.0399
RP11-529H20.5	1.50719	-0.497723	3.38576	0.00911344	0.107311	-2.32882	2.04032
SMCR8	0.530683	4.42158	3.38498	0.00912417	0.107311	-2.85652	2.03981
CDO1	1.89252	-1.74709	3.38195	0.00916597	0.10733	-2.32334	2.03782
HOXD1	-1.48306	-0.566344	-3.38188	0.00916703	0.10733	-2.39508	2.03777
KCNS3	0.994737	-0.223575	3.38232	0.00916084	0.10733	-2.40319	2.03806
KIAA1191	0.321427	7.3025	3.38369	0.00914198	0.10733	-3.08042	2.03896
PRR11	-1.62959	5.14597	-3.38252	0.00915808	0.10733	-2.99948	2.0382
RAB14	0.335021	6.56672	3.3821	0.009164	0.10733	-3.03544	2.03791
VIP	-2.64138	7.4046	-3.38306	0.00915062	0.10733	-3.14059	2.03855
MTMR12	-0.354627	5.22047	-3.38044	0.00918693	0.107425	-2.9838	2.03683
TGM2	2.2154	4.47006	3.38076	0.00918252	0.107425	-2.91752	2.03704
COL8A1	-2.65276	-0.0766379	-3.37987	0.00919486	0.107448	-2.49801	2.03645
AP001596.6	-3.04224	-3.55215	-3.37761	0.00922628	0.107506	-2.32713	2.03497
FAM64A	-0.777675	3.94981	-3.37772	0.00922477	0.107506	-2.82496	2.03504
MT-CO1	0.987575	10.3472	3.37767	0.00922542	0.107506	-3.21783	2.03501
NPEPPS	-0.493683	6.36432	-3.37739	0.0092293	0.107506	-3.08025	2.03483
TACC3	-1.06481	5.92081	-3.37855	0.00921313	0.107506	-3.05022	2.03559
KIFC1	-1.10106	5.28549	-3.37636	0.00924376	0.107567	-3.0073	2.03415
SWSAP1	0.720828	1.7835	3.37617	0.00924634	0.107567	-2.48177	2.03403
RFC5	-1.47685	5.21706	-3.37476	0.00926612	0.107675	-3.02985	2.0331
TMEM191C	1.55699	-2.06051	3.37466	0.00926745	0.107675	-2.32922	2.03304
ARHGAP22	-1.48692	3.52683	-3.37103	0.00931842	0.108107	-3.02994	2.03066
ELMOD3	0.813105	3.16095	3.37124	0.00931555	0.108107	-2.71441	2.03079
RP11-166D19.1	-1.20111	3.3328	-3.37075	0.00932241	0.108107	-2.86923	2.03047
ITGB3BP	-0.632997	4.70775	-3.36876	0.00935047	0.108362	-2.97766	2.02917
PPP3CB	-0.900828	5.11223	-3.36803	0.0093608	0.108362	-2.99852	2.02869
RP3-460G2.2	3.21281	-3.27582	3.36793	0.00936225	0.108362	-2.35855	2.02862
CYP26B1	-1.33356	-4.25412	-3.36727	0.0093715	0.1084	-2.33756	2.02819
RBM20	0.475771	4.55163	3.3667	0.00937959	0.108425	-2.80769	2.02782
AP001604.3	1.93081	-3.94591	3.36559	0.00939534	0.108538	-2.37184	2.02709
GZF1	0.482689	5.34699	3.36316	0.00942997	0.108869	-2.96588	2.02549
KLHL17	-0.769136	2.9583	-3.36195	0.00944731	0.108931	-2.72121	2.02469
TYK2	-0.428364	5.85199	-3.36234	0.00944165	0.108931	-3.06168	2.02495
MAPK8IP3	0.453415	5.85423	3.36113	0.009459	0.108997	-3.0045	2.02415
CALY	2.90894	-1.46191	3.35974	0.0094789	0.10901	-2.36214	2.02324
NPHP1	-0.875285	1.32591	-3.36052	0.00946765	0.10901	-2.64057	2.02376
NUPL2	0.448822	5.75113	3.35938	0.0094841	0.10901	-3.02207	2.023
RP5-973M2.2	2.54682	-4.25564	3.35997	0.00947565	0.10901	-2.36357	2.02339
GJC1	-0.840104	5.51502	-3.35682	0.00952079	0.109215	-3.08515	2.02133
HIST2H2AA3	-1.37147	6.81131	-3.35641	0.00952675	0.109215	-3.14242	2.02106
NIN	-1.00089	6.29506	-3.3569	0.00951962	0.109215	-3.10727	2.02138
PTP4A2	-0.734011	7.67965	-3.35606	0.00953186	0.109215	-3.18007	2.02082
TMEM50B	0.864076	5.83889	3.35695	0.00951898	0.109215	-3.0025	2.02141
EPB41L1	-0.725924	3.63557	-3.35509	0.00954583	0.109306	-2.80963	2.02019
FILIP1	-1.55306	3.44119	-3.35394	0.00956246	0.109359	-3.04069	2.01943
RNF150	0.617925	6.7106	3.35406	0.00956067	0.109359	-3.10633	2.01951
PCGF5	-0.933683	5.04264	-3.3521	0.00958915	0.109595	-3.06026	2.01822
KCND2	2.30336	-1.08996	3.35165	0.00959555	0.1096	-2.44041	2.01793
ACADM	0.349254	6.13077	3.35007	0.00961859	0.109618	-3.07483	2.01689
BNIP3	-1.10899	6.44744	-3.34998	0.00961994	0.109618	-3.11277	2.01683
C14orf159	-0.555847	3.67583	-3.34888	0.00963591	0.109618	-2.86715	2.01611
GPC1	0.534177	5.72597	3.34959	0.00962562	0.109618	-3.07943	2.01657
LA16c-349E10.1	1.79865	-0.902723	3.34932	0.00962953	0.109618	-2.36225	2.0164
RGS14	-0.591746	3.22853	-3.35036	0.00961432	0.109618	-2.79402	2.01708
TPRA1	0.570848	4.8317	3.34865	0.00963925	0.109618	-2.95909	2.01596
KRT15	-3.60292	-2.38359	-3.34801	0.0096486	0.109622	-2.38455	2.01554
MAK16	-1.06325	6.9305	-3.34781	0.00965161	0.109622	-3.14364	2.0154
PACSIN1	2.24345	-4.2342	3.3467	0.00966776	0.109668	-2.39164	2.01467
SH2B3	-2.26255	6.86435	-3.34698	0.00966374	0.109668	-3.14986	2.01485
RFX3	-0.532354	3.9407	-3.34509	0.00969136	0.109868	-2.81029	2.01362
ETFB	-0.597754	4.71394	-3.34269	0.00972671	0.110131	-2.93381	2.01203
PAOX	-0.737351	0.951528	-3.34269	0.00972662	0.110131	-2.5719	2.01204
CACNB1	0.795644	2.56945	3.34082	0.00975419	0.110374	-2.64278	2.01081
FBXO34	-0.371372	5.46143	-3.33968	0.00977114	0.110428	-3.06493	2.01005
KCNH1-IT1	2.67929	-3.7899	3.33988	0.00976813	0.110428	-2.39592	2.01019
ASB7	0.420401	5.32887	3.33887	0.00978315	0.110467	-3.01416	2.00952
FOXC2	-3.8132	-3.74225	-3.33854	0.00978793	0.110467	-2.37758	2.00931
RP11-697E2.4	1.72665	-3.76087	3.33822	0.00979274	0.110467	-2.39299	2.0091
POLR3C	0.322586	6.09178	3.33596	0.00982639	0.110778	-3.10187	2.00761
MIF	-0.449268	6.0127	-3.33515	0.00983842	0.110845	-3.09283	2.00707
HIST1H2BI	-1.6337	5.73057	-3.33469	0.00984524	0.110853	-3.09588	2.00677
ANP32A	-1.16646	7.80621	-3.33169	0.00989019	0.1111	-3.20784	2.0048
ATP1B3	-0.493091	7.58939	-3.33132	0.00989566	0.1111	-3.18244	2.00455
HMG20B	-1.0444	4.87262	-3.33205	0.00988467	0.1111	-3.08891	2.00504
JHDM1D	0.938012	4.66252	3.33204	0.00988486	0.1111	-2.85605	2.00503
TNFRSF19	-1.36768	3.68475	-3.33119	0.00989769	0.1111	-2.79009	2.00447
PCSK5	-1.05619	0.388804	-3.33054	0.00990745	0.111142	-2.57381	2.00404
ASPSCR1	0.364923	5.04467	3.33001	0.00991539	0.111162	-3.03317	2.00369
GPC6	1.2927	5.4132	3.3295	0.00992296	0.111179	-2.99095	2.00336
ZNF230	0.477245	3.61377	3.32823	0.00994219	0.111326	-2.85245	2.00252
ADRA2C	0.958435	4.3508	3.32627	0.00997167	0.11148	-2.82059	2.00123
C2CD4C	-1.53658	-1.50294	-3.3261	0.00997436	0.11148	-2.47738	2.00111
MINPP1	0.442551	5.84083	3.32664	0.0099661	0.11148	-3.09613	2.00147
AL132709.5	-1.2555	4.15287	-3.32483	0.00999348	0.111608	-2.82636	2.00028
KANK1	3.4673	-3.60069	3.32453	0.00999807	0.111608	-2.40957	2.00008
SPN	2.12686	-3.66351	3.32369	0.0100109	0.111683	-2.41992	1.99953
RNF213	-0.536001	6.83771	-3.32219	0.0100337	0.111869	-3.22765	1.99854
RBM41	-0.705981	3.26895	-3.32073	0.0100559	0.112048	-2.85459	1.99758
ACOX2	-1.13168	-3.19833	-3.31537	0.0101379	0.112082	-2.42447	1.99405
BEAN1	-1.60052	-3.64981	-3.31541	0.0101374	0.112082	-2.40631	1.99408
CCDC138	-0.541971	4.33356	-3.31575	0.0101322	0.112082	-3.01302	1.9943
GNS	0.343227	8.10061	3.31629	0.0101239	0.112082	-3.2483	1.99465
KSR1	-0.647098	3.24746	-3.31973	0.0100711	0.112082	-2.79444	1.99692
PARP11	1.30644	0.292879	3.31612	0.0101265	0.112082	-2.43518	1.99454
PRSS36	2.21061	-0.809058	3.31758	0.0101041	0.112082	-2.41103	1.9955
RABGAP1	0.397189	6.36499	3.31672	0.0101173	0.112082	-3.14176	1.99494
RP11-600F24.7	1.75493	0.44234	3.31532	0.0101387	0.112082	-2.43735	1.99402
SFMBT2	-0.405196	5.85236	-3.31772	0.0101019	0.112082	-3.12426	1.9956
THEMIS2	-0.927831	0.74184	-3.31521	0.0101404	0.112082	-2.59252	1.99394
TMEM184A	1.16853	-1.75428	3.31924	0.0100786	0.112082	-2.42225	1.9966
WNT10B	1.2589	-1.78229	3.31765	0.010103	0.112082	-2.40292	1.99555
ZNF221	0.607733	3.18784	3.31491	0.0101451	0.112082	-2.75929	1.99374
RCN1	-0.723774	6.99398	-3.31376	0.0101627	0.112141	-3.23317	1.99299
UBE2QL1	2.34307	0.670966	3.31409	0.0101577	0.112141	-2.41327	1.9932
DEDD2	0.54435	4.30171	3.31186	0.0101922	0.11233	-2.92764	1.99173
SRRM3	-0.826621	2.71422	-3.31193	0.0101911	0.11233	-2.61155	1.99178
BIRC5	-1.34372	6.88376	-3.31097	0.010206	0.112414	-3.2196	1.99115
ATP6V1G1	0.400648	7.57627	3.30907	0.0102355	0.112535	-3.20411	1.98989
DKFZP761J1410	-0.764173	4.01122	-3.30922	0.0102331	0.112535	-2.86301	1.98999
PTOV1	-0.486377	6.20385	-3.30915	0.0102342	0.112535	-3.14988	1.98995
EDIL3	1.7932	4.67593	3.30824	0.0102484	0.112541	-2.71713	1.98934
KPNA5	-0.600181	4.14235	-3.30837	0.0102463	0.112541	-2.90191	1.98943
CENPL	-0.479643	4.87414	-3.30774	0.0102561	0.112557	-3.08093	1.98902
KLF7	-0.428981	5.56917	-3.30644	0.0102764	0.112713	-3.09947	1.98816
EIF2D	0.373596	6.30244	3.30414	0.0103124	0.11304	-3.16162	1.98664
AC105053.3	-1.52952	-2.6816	-3.30312	0.0103284	0.113053	-2.45249	1.98597
B3GNT9	1.04599	4.29046	3.30209	0.0103445	0.113053	-2.91537	1.98529
COPS7A	0.544861	6.29283	3.30305	0.0103295	0.113053	-3.14629	1.98592
CRYGS	1.74084	-0.544467	3.30189	0.0103477	0.113053	-2.43017	1.98516
ERP44	0.471786	6.55099	3.30136	0.0103561	0.113053	-3.1679	1.9848
MOB4	-0.657527	5.32255	-3.3015	0.0103539	0.113053	-3.08332	1.9849
PDXDC2P	0.985716	3.22603	3.30129	0.0103571	0.113053	-2.77565	1.98476
AC017048.3	-0.41897	4.97942	-3.29943	0.0103864	0.113221	-3.16044	1.98354
DHX29	-0.430118	6.1706	-3.29913	0.0103911	0.113221	-3.16252	1.98334
MARCKS	-0.935023	7.41697	-3.29927	0.0103889	0.113221	-3.21933	1.98343
BIK	-1.93953	-1.78112	-3.29849	0.0104012	0.113263	-2.46474	1.98292
CAPN12	-2.09234	-3.80801	-3.29801	0.0104089	0.113279	-2.42775	1.98259
EPG5	0.595893	4.56076	3.29712	0.0104229	0.113364	-3.05475	1.98201
RIT2	2.1671	-2.07546	3.29659	0.0104313	0.113387	-2.4289	1.98166
MGAT2	0.574172	6.72266	3.2957	0.0104454	0.113473	-3.17803	1.98107
UNC5C	-0.798696	7.92004	-3.29531	0.0104516	0.113473	-3.2748	1.98082
KIAA1009	-0.626909	4.16876	-3.29111	0.0105186	0.114065	-3.04861	1.97804
RP11-33O4.1	0.98836	-0.783777	3.2915	0.0105124	0.114065	-2.46228	1.9783
PCDH9	0.606059	5.55908	3.28918	0.0105496	0.114332	-2.99582	1.97676
SNHG11	0.753882	3.8305	3.28748	0.0105769	0.114549	-2.89017	1.97564
SSC5D	2.15789	-1.33062	3.28715	0.0105822	0.114549	-2.44486	1.97542
DLGAP5	-0.994611	6.16051	-3.28618	0.0105978	0.114628	-3.20344	1.97479
DUSP10	0.533037	4.80873	3.28592	0.010602	0.114628	-3.01899	1.97461
AC097381.1	2.09754	-4.29956	3.28297	0.0106497	0.115074	-2.46887	1.97266
DGKZ	-0.454401	5.13262	-3.28239	0.010659	0.115108	-3.14481	1.97228
PSMB1	-0.341759	7.36946	-3.28035	0.0106921	0.115397	-3.23933	1.97094
HIST1H2BL	-1.61098	5.48407	-3.27916	0.0107116	0.11547	-3.17681	1.97014
ZBED6	-1.1754	4.89895	-3.27918	0.0107113	0.11547	-3.16181	1.97016
TMEM158	-2.0881	1.72842	-3.27849	0.0107226	0.11552	-2.91234	1.9697
C1orf234	2.74109	-3.42738	3.27774	0.0107347	0.115521	-2.46624	1.96921
TBX6	1.1299	-0.856028	3.2777	0.0107354	0.115521	-2.47125	1.96918
PROSC	0.742379	6.07066	3.27673	0.0107512	0.115559	-3.1524	1.96854
RP11-782C8.1	0.659664	2.41152	3.27671	0.0107516	0.115559	-2.76379	1.96853
TBL2	0.419985	5.93896	3.27556	0.0107704	0.115693	-3.17381	1.96777
TTYH3	-0.937215	6.40489	-3.27495	0.0107805	0.115733	-3.22838	1.96736
TLL1	1.44262	-2.26967	3.27385	0.0107985	0.115858	-2.48758	1.96664
HPSE	0.688913	3.07483	3.27266	0.0108181	0.115912	-2.91434	1.96585
PRTG	0.658575	5.74704	3.27203	0.0108286	0.115912	-3.16419	1.96543
RASA4	0.688284	2.61189	3.27274	0.0108168	0.115912	-2.81278	1.9659
SRSF11	-0.307474	7.17127	-3.272	0.010829	0.115912	-3.2753	1.96541
HDAC3	0.651676	5.80586	3.2713	0.0108405	0.115931	-3.16039	1.96495
RP11-687F6.1	-1.53039	-2.94464	-3.27112	0.0108434	0.115931	-2.46524	1.96483
HMGCR	-0.630687	7.95101	-3.26913	0.0108764	0.116089	-3.28966	1.96351
NALCN-AS1	-1.78105	-2.21137	-3.2694	0.0108719	0.116089	-2.56326	1.96369
SPDL1	-1.73519	6.04025	-3.26907	0.0108774	0.116089	-3.25263	1.96347
ROR1	-1.18896	3.80563	-3.26849	0.010887	0.116123	-3.05306	1.96309
ZNF883	1.44978	0.726648	3.26699	0.0109119	0.116321	-2.48257	1.9621
RP11-92K15.3	3.7901	-3.7014	3.26585	0.0109309	0.116387	-2.47941	1.96134
TMPO-AS1	-0.729488	2.19974	-3.26606	0.0109274	0.116387	-2.75935	1.96148
PFKL	-0.791927	5.56009	-3.26272	0.0109831	0.116819	-3.22653	1.95928
RP11-171I2.2	0.957543	-0.57493	3.26266	0.0109842	0.116819	-2.51854	1.95923
RP11-517B11.7	-0.757413	1.97845	-3.26197	0.0109958	0.116873	-2.69038	1.95877
RP11-87C12.5	1.79871	-0.730404	3.2593	0.0110406	0.117281	-2.50884	1.95701
ASIC1	-0.573884	3.48487	-3.25801	0.0110622	0.117317	-2.83692	1.95616
CTD-3064M3.7	-1.18816	-1.36949	-3.25762	0.0110689	0.117317	-2.53922	1.9559
SPA17	-1.11688	2.4223	-3.25831	0.0110572	0.117317	-2.78957	1.95635
TATDN3	0.913771	4.9939	3.25757	0.0110697	0.117317	-3.03545	1.95587
APOL6	-1.72629	1.45872	-3.25693	0.0110806	0.117351	-3.07976	1.95544
MEF2A	-0.578926	5.38913	-3.25662	0.0110858	0.117351	-3.19967	1.95523
RGL2	-0.615177	5.90989	-3.25562	0.0111027	0.117461	-3.22396	1.95457
RP11-574K11.29	1.24614	-0.446675	3.25247	0.0111561	0.117958	-2.53581	1.95249
NUTM2A-AS1	0.550232	4.5643	3.25194	0.0111651	0.117985	-3.04906	1.95214
RP11-1055B8.7	-1.01876	2.37564	-3.2506	0.0111879	0.118089	-2.82238	1.95125
RP11-525A16.4	-2.60773	-1.40191	-3.25078	0.0111849	0.118089	-2.54702	1.95137
PHEX	-1.38142	-0.935251	-3.24963	0.0112046	0.118196	-2.53876	1.95061
RRP15	-0.662065	6.2788	-3.24826	0.011228	0.118374	-3.2589	1.9497
REL	0.70868	2.98637	3.24719	0.0112463	0.118499	-2.87254	1.94899
TAP2	-0.740908	4.67097	-3.24677	0.0112535	0.118506	-3.17603	1.94871
KCND1	0.881528	0.410795	3.24442	0.0112939	0.118541	-2.60498	1.94716
LRRC37A	0.614097	2.48075	3.24573	0.0112714	0.118541	-2.82026	1.94802
LYL1	-1.72915	2.45988	-3.24431	0.0112958	0.118541	-2.76499	1.94708
RABL5	-0.583328	4.26507	-3.24495	0.0112848	0.118541	-3.09895	1.94751
SOGA1	0.438816	5.11265	3.24447	0.011293	0.118541	-3.11405	1.94719
TMEM130	2.9263	1.52221	3.24504	0.0112833	0.118541	-2.53192	1.94756
AC087294.2	-1.34399	-2.39837	-3.24216	0.011333	0.118563	-2.50379	1.94566
CD226	1.58672	-2.0869	3.24031	0.011365	0.118563	-2.5024	1.94443
COL11A1	1.67627	-2.92373	3.24012	0.0113684	0.118563	-2.50373	1.9443
GGCT	-0.396369	6.27415	-3.24146	0.0113451	0.118563	-3.27053	1.94519
HIST1H2BD	-1.32604	7.0141	-3.24005	0.0113695	0.118563	-3.32717	1.94426
INPP5J	-0.983082	1.04368	-3.24259	0.0113256	0.118563	-2.57145	1.94594
NDE1	-0.733377	4.83812	-3.24321	0.0113148	0.118563	-3.18806	1.94635
REEP2	-0.841574	3.82962	-3.24018	0.0113673	0.118563	-2.92696	1.94434
SSH3	-0.737983	0.59729	-3.24363	0.0113076	0.118563	-2.74811	1.94663
USP18	-1.36713	1.20896	-3.24171	0.0113407	0.118563	-2.87597	1.94536
ZNF35	-0.429768	4.13277	-3.24138	0.0113464	0.118563	-3.0745	1.94514
RP11-503E24.2	1.66243	-1.2617	3.23936	0.0113816	0.118621	-2.50929	1.9438
C9orf64	0.344383	5.35998	3.23785	0.0114078	0.118624	-3.2058	1.9428
CDCA5	-0.963592	5.00758	-3.23747	0.0114144	0.118624	-3.22948	1.94255
FGFR1	-0.912252	6.21645	-3.23841	0.011398	0.118624	-3.28725	1.94317
RBM42	-0.540021	5.13861	-3.23771	0.0114103	0.118624	-3.19994	1.9427
SERAC1	0.611254	2.94416	3.23749	0.0114141	0.118624	-2.77645	1.94256
RPA3	-0.634708	5.41631	-3.23614	0.0114376	0.118797	-3.23438	1.94167
FUS	-0.769254	6.22033	-3.23398	0.0114753	0.119053	-3.28001	1.94023
SNRPC	-0.394477	6.876	-3.23411	0.0114731	0.119053	-3.31209	1.94032
CNOT8	-0.47319	6.14268	-3.23335	0.0114864	0.1191	-3.27674	1.93982
MCEE	0.815047	2.76061	3.23224	0.0115059	0.119118	-2.80861	1.93908
SH3RF3	-1.89337	1.07206	-3.23176	0.0115143	0.119118	-3.03733	1.93876
SNORD3B-1	-0.688636	7.72182	-3.2326	0.0114995	0.119118	-3.33584	1.93932
TMA16	-0.473174	6.04945	-3.23197	0.0115108	0.119118	-3.27037	1.9389
HPCAL1	-1.49708	6.59302	-3.23112	0.0115256	0.119168	-3.30474	1.93833
FAM72A	-0.805828	3.50076	-3.2302	0.0115419	0.119269	-2.99822	1.93772
NRBP2	-1.12792	2.34478	-3.22936	0.0115567	0.119354	-2.8823	1.93716
CIT	-0.994748	5.07611	-3.22888	0.0115651	0.119372	-3.23219	1.93685
RP11-574K11.31	2.05388	-4.14789	3.22646	0.011608	0.119743	-2.5324	1.93524
RP11-996F15.2	-1.34243	0.421008	-3.22611	0.0116142	0.119743	-2.64975	1.93501
FAM134B	-1.4479	2.32577	-3.22563	0.0116227	0.119764	-2.83551	1.93469
ETV5	-0.700344	6.29439	-3.22296	0.0116703	0.120186	-3.27979	1.93292
NME4	-0.620202	6.22064	-3.22124	0.011701	0.120366	-3.31046	1.93178
RP11-230G5.2	-2.61159	-3.20505	-3.22131	0.0116997	0.120366	-2.56742	1.93182
SDPR	-1.67625	-1.06307	-3.2206	0.0117124	0.120416	-2.57598	1.93135
VSNL1	-1.48687	-0.189391	-3.2201	0.0117214	0.12044	-2.8121	1.93102
ZDHHC13	-0.52842	4.06507	-3.21858	0.0117486	0.120652	-3.14285	1.93001
AKT3	-0.519231	7.56963	-3.21593	0.0117962	0.120774	-3.37549	1.92826
ARRDC1	-0.697946	2.29987	-3.21425	0.0118267	0.120774	-2.92265	1.92714
FER	-0.564163	5.2315	-3.21685	0.0117798	0.120774	-3.24011	1.92886
HMMR	-1.77722	5.6252	-3.21446	0.0118229	0.120774	-3.30431	1.92728
IGF2BP2	-0.629286	1.52169	-3.21508	0.0118116	0.120774	-3.10744	1.92769
KBTBD2	-0.348451	6.63696	-3.214	0.0118312	0.120774	-3.33341	1.92697
NELFCD	-0.52959	6.54704	-3.21504	0.0118123	0.120774	-3.3242	1.92767
NRP1	-0.559655	7.49778	-3.21351	0.0118401	0.120774	-3.38868	1.92665
PABPC5	-0.894262	-0.7569	-3.21374	0.0118359	0.120774	-2.75738	1.9268
PLEKHA4	-1.57534	3.35447	-3.21551	0.0118038	0.120774	-3.03818	1.92798
RP1-193H18.2	-1.33439	0.861926	-3.2136	0.0118384	0.120774	-2.82525	1.92671
RPS10	0.613004	4.60236	3.21451	0.011822	0.120774	-3.06932	1.92731
HIST1H2AJ	-1.60047	6.31113	-3.2105	0.0118947	0.121263	-3.34363	1.92465
FOXRED2	0.772317	3.7973	3.20816	0.0119374	0.121563	-2.92511	1.92309
HDHD1	-1.3019	4.13121	-3.20836	0.0119337	0.121563	-3.0829	1.92322
RC3H1-IT1	2.44406	-3.52282	3.20775	0.0119449	0.121571	-2.5534	1.92282
KPNA3	-0.451343	6.56332	-3.20691	0.0119602	0.121659	-3.32924	1.92226
CNTRL	-0.605366	5.05164	-3.20393	0.0120149	0.121943	-3.24483	1.92028
PDGFRA	-0.457552	5.84061	-3.20431	0.0120079	0.121943	-3.39888	1.92053
TMEM41B	-0.450371	5.72731	-3.20401	0.0120133	0.121943	-3.31935	1.92034
ZNF454	1.39739	-1.77202	3.20401	0.0120134	0.121943	-2.55	1.92034
PLEKHO1	-0.419052	5.71349	-3.20246	0.012042	0.122149	-3.30804	1.9193
HIST2H3C	-1.71297	6.64564	-3.20078	0.012073	0.122396	-3.38347	1.91819
CRYM	-1.12708	-1.74593	-3.19798	0.0121248	0.122649	-2.68143	1.91632
ESD	-0.469266	6.72501	-3.19807	0.0121232	0.122649	-3.35169	1.91638
FZD3	-0.466194	5.8047	-3.19905	0.012105	0.122649	-3.27498	1.91703
ZBTB10	-0.467062	6.32469	-3.1986	0.0121134	0.122649	-3.32896	1.91674
CISD3	-0.855258	4.33327	-3.19688	0.0121452	0.122706	-3.15732	1.9156
COL27A1	-0.918193	0.310533	-3.19514	0.0121776	0.122706	-2.80747	1.91444
DTYMK	-0.829507	5.62919	-3.19519	0.0121767	0.122706	-3.30535	1.91447
NME6	0.475005	3.64914	3.19514	0.0121776	0.122706	-2.98933	1.91444
RP11-247C2.2	-2.15719	-0.480227	-3.19645	0.0121532	0.122706	-2.77326	1.91531
SECISBP2	-0.891523	5.56549	-3.19576	0.0121661	0.122706	-3.29457	1.91485
ZNF207	-0.473891	7.12998	-3.19572	0.0121668	0.122706	-3.38654	1.91482
CDC40	0.455948	5.82179	3.19343	0.0122095	0.122828	-3.27302	1.9133
MYRIP	-1.14993	3.84367	-3.19317	0.0122144	0.122828	-3.08344	1.91313
NIT2	-0.519258	5.12226	-3.19407	0.0121976	0.122828	-3.27585	1.91373
RP11-383H13.1	0.582527	2.88235	3.19305	0.0122167	0.122828	-3.06175	1.91304
RP11-24J23.2	-2.59682	2.21142	-3.19262	0.0122248	0.122841	-3.00973	1.91276
CREBZF	-0.448134	4.87051	-3.18979	0.0122778	0.123141	-3.1832	1.91088
CTD-3018O17.3	1.33556	-0.429182	3.18942	0.0122848	0.123141	-2.59429	1.91063
PCDH8	1.4578	-0.596374	3.18981	0.0122774	0.123141	-2.59005	1.91089
RP11-131L23.2	3.76926	-4.14714	3.19003	0.0122733	0.123141	-2.57325	1.91104
SYNE4	2.18859	-3.13086	3.18923	0.0122884	0.123141	-2.57366	1.91051
FAM87A	3.84457	-3.16509	3.18544	0.01236	0.123378	-2.57634	1.90798
HIST1H4H	-1.49167	6.8945	-3.18644	0.0123409	0.123378	-3.39914	1.90865
HNRNPM	-0.646859	7.78045	-3.18608	0.0123479	0.123378	-3.43144	1.90841
HNRNPU-AS1	-0.465206	3.53844	-3.1857	0.012355	0.123378	-3.10381	1.90816
IGF2-AS	-1.11939	3.25056	-3.1873	0.0123247	0.123378	-2.93934	1.90922
SPP1	5.01258	-1.99781	3.18685	0.0123333	0.123378	-2.57155	1.90892
STK36	0.501497	4.51135	3.1853	0.0123626	0.123378	-3.19567	1.90789
TPTE	-0.604304	0.576965	-3.18511	0.0123663	0.123378	-2.87226	1.90776
APMAP	0.449604	7.67163	3.18152	0.0124343	0.123382	-3.41747	1.90538
DCLK2	0.678466	3.88218	3.18297	0.0124068	0.123382	-3.06103	1.90634
ENG	-1.08424	2.13483	-3.18316	0.0124032	0.123382	-3.05914	1.90646
FHOD3	1.84149	2.3187	3.18262	0.0124135	0.123382	-2.70514	1.90611
HIST2H3A	-1.74457	6.43545	-3.18202	0.0124249	0.123382	-3.40291	1.90571
MSX1	-1.47904	3.54731	-3.18152	0.0124343	0.123382	-3.25274	1.90538
NME1	-0.509081	7.05089	-3.18325	0.0124015	0.123382	-3.39054	1.90653
RP11-112J3.16	1.42949	-1.74255	3.18221	0.0124213	0.123382	-2.58343	1.90583
RP11-674N23.1	1.71347	-2.15896	3.18412	0.012385	0.123382	-2.57429	1.90711
SYT7	-0.797537	1.60704	-3.18366	0.0123937	0.123382	-2.75736	1.9068
MEGF10	-2.32917	-1.76361	-3.18068	0.0124505	0.123474	-2.73041	1.90481
ASXL1	-0.365872	6.72282	-3.17849	0.0124922	0.123703	-3.39161	1.90336
FOXH1	2.33374	-3.49352	3.17841	0.0124938	0.123703	-2.58194	1.9033
NAPEPLD	-0.543075	3.67838	-3.17847	0.0124927	0.123703	-3.11108	1.90334
ANKFY1	-0.41729	5.18245	-3.17421	0.0125746	0.124031	-3.31185	1.9005
CKAP5	-0.589716	7.91814	-3.17521	0.0125552	0.124031	-3.46875	1.90118
EPN1	-0.337912	6.56723	-3.17536	0.0125524	0.124031	-3.38838	1.90127
FAN1	0.528282	5.57491	3.17431	0.0125725	0.124031	-3.30453	1.90058
ITGA11	-1.04958	4.40786	-3.17557	0.0125483	0.124031	-3.34805	1.90141
MSANTD4	0.600593	4.92574	3.17439	0.0125712	0.124031	-3.12677	1.90062
RP11-10A14.4	1.28665	-0.0804334	3.17549	0.0125499	0.124031	-2.62052	1.90136
PIEZO1	0.816473	2.43882	3.17347	0.0125888	0.124103	-2.8323	1.90002
PBX1	0.947671	5.23549	3.17232	0.012611	0.124255	-3.31423	1.89925
CA10	-1.48555	1.70599	-3.17098	0.012637	0.124377	-2.83404	1.89836
COQ4	0.711607	5.23574	3.17113	0.0126341	0.124377	-3.24373	1.89846
ABI3	-1.85781	-2.36853	-3.16868	0.0126816	0.124726	-2.61286	1.89683
PPIF	0.521002	6.84479	3.16845	0.0126862	0.124726	-3.39977	1.89667
ACOT1	0.641197	2.28298	3.16796	0.0126957	0.124752	-2.81195	1.89634
CCDC74A	-0.724958	2.62282	-3.16759	0.0127029	0.124756	-2.93354	1.8961
HEATR2	-0.607871	6.34764	-3.1672	0.0127105	0.124763	-3.39377	1.89584
ARMC1	-0.522976	6.30696	-3.16626	0.0127288	0.124875	-3.38911	1.89521
CD99	-0.767717	5.41021	-3.16501	0.0127533	0.12488	-3.43295	1.89438
HSPA5	-0.278204	9.08402	-3.16484	0.0127567	0.12488	-3.52172	1.89426
SYCE1L	1.61585	-1.69258	3.16487	0.012756	0.12488	-2.60869	1.89428
TMED3	0.305424	6.61269	3.16513	0.012751	0.12488	-3.3834	1.89446
HVCN1	-2.6631	-3.17415	-3.16389	0.0127753	0.124927	-2.60131	1.89363
RP11-80H5.2	1.4041	-1.85277	3.1642	0.0127691	0.124927	-2.60703	1.89384
ATXN3	0.708716	4.70032	3.16183	0.0128157	0.125188	-3.18062	1.89226
MIR3654	-1.30879	-2.47265	-3.16213	0.0128098	0.125188	-2.6162	1.89246
UGGT2	-0.37207	5.86944	-3.15998	0.0128522	0.125478	-3.38145	1.89102
GPR160	-1.41234	0.135831	-3.15872	0.0128771	0.125653	-2.76101	1.89018
GCNT1	2.45929	-0.688344	3.15805	0.0128903	0.125715	-2.63081	1.88974
BOP1	-0.64176	5.89155	-3.15603	0.0129303	0.12597	-3.38486	1.88839
PDE6B	-0.63802	2.65658	-3.15606	0.0129298	0.12597	-3.03649	1.88841
NADK	0.423425	6.13999	3.15435	0.0129638	0.12617	-3.35474	1.88727
PPP1R26-AS1	1.50805	1.84922	3.15418	0.012967	0.12617	-2.84952	1.88716
RP11-439A17.7	-1.16112	1.33528	-3.15396	0.0129716	0.12617	-2.83275	1.88701
RP11-556E13.1	-1.70121	-0.0754637	-3.15237	0.0130032	0.126316	-3.00995	1.88595
SLC1A4	1.33609	3.3498	3.1528	0.0129947	0.126316	-2.97944	1.88623
SSR3	-1.14105	8.39912	-3.15216	0.0130074	0.126316	-3.52797	1.88581
C19orf12	-0.808122	4.9492	-3.1504	0.0130426	0.126323	-3.32314	1.88464
KCNK1	-0.654589	1.46967	-3.15066	0.0130375	0.126323	-3.31203	1.88481
PKIG	-0.508637	3.37513	-3.15047	0.0130412	0.126323	-3.13551	1.88468
POLD3	-0.83981	4.05425	-3.15005	0.0130497	0.126323	-3.19933	1.8844
RP11-312O7.2	-0.938477	1.76199	-3.15031	0.0130444	0.126323	-2.88473	1.88457
SEC23B	0.354474	7.19125	3.1503	0.0130447	0.126323	-3.43975	1.88457
LDHA	-1.14258	7.66179	-3.14866	0.0130776	0.126495	-3.56885	1.88347
LSR	-1.62188	-0.282653	-3.14847	0.0130814	0.126495	-2.7128	1.88335
MRPL14	-0.482799	5.47613	-3.14783	0.0130941	0.126551	-3.35333	1.88292
SNRNP35	-0.698446	4.27309	-3.14722	0.0131065	0.126604	-3.23465	1.88251
CSNK1D	0.362842	6.79268	3.14634	0.0131243	0.126672	-3.44119	1.88193
GLIS2	0.771667	2.19427	3.14618	0.0131275	0.126672	-2.85069	1.88182
DACT1	1.95815	1.37513	3.14344	0.0131829	0.126991	-2.93744	1.87999
PPP1R27	1.68269	-3.49618	3.14247	0.0132024	0.126991	-2.6283	1.87935
RP11-360F5.3	-1.05629	-2.74036	-3.14286	0.0131947	0.126991	-2.63831	1.8796
SPRY2	-1.16573	7.52816	-3.14249	0.0132022	0.126991	-3.50434	1.87935
VPS54	-0.517507	5.78312	-3.14392	0.0131731	0.126991	-3.40508	1.88031
ZDHHC1	-1.05824	1.35017	-3.14318	0.013188	0.126991	-2.92333	1.87982
B3GNT7	-1.96106	1.08043	-3.14173	0.0132175	0.127069	-2.99704	1.87885
ADCY10	1.45211	-2.3218	3.13896	0.013274	0.127277	-2.63372	1.877
FAM110A	-0.793905	1.6204	-3.13937	0.0132655	0.127277	-2.85123	1.87728
PAICS	-0.842918	8.22273	-3.14027	0.0132473	0.127277	-3.52284	1.87787
PRKCDBP	-2.20548	-2.08746	-3.13994	0.0132539	0.127277	-2.77062	1.87766
SHANK1	-2.46325	-2.70148	-3.13924	0.0132683	0.127277	-2.63506	1.87719
BSN	1.48859	1.71546	3.13842	0.013285	0.127315	-2.74531	1.87664
EMC3	0.436957	5.18024	3.13615	0.0133313	0.127634	-3.32348	1.87513
SLC38A5	3.35377	-3.03259	3.13611	0.0133323	0.127634	-2.63922	1.8751
MRPL13	-0.632677	6.12024	-3.13531	0.0133485	0.127656	-3.43934	1.87457
RCAN3	-1.07252	-0.638496	-3.13541	0.0133466	0.127656	-2.91845	1.87463
EVL	-0.808024	5.49819	-3.13461	0.0133629	0.127726	-3.37452	1.8741
LINC00511	-1.90002	3.34279	-3.13383	0.0133791	0.127813	-3.10074	1.87357
PANK4	-0.61573	3.34202	-3.13336	0.0133887	0.127839	-3.07828	1.87326
MAP4K2	-1.0576	3.28585	-3.13275	0.0134013	0.127892	-3.2784	1.87285
RET	-1.72675	7.70489	-3.13163	0.0134243	0.128044	-3.51365	1.87211
ITPKC	0.570252	4.40909	3.13095	0.0134385	0.128112	-3.24362	1.87165
AD000090.2	1.70212	4.27537	3.12818	0.0134958	0.128515	-3.11594	1.8698
B3GALT2	3.03096	-0.479124	3.12857	0.0134878	0.128515	-2.646	1.87006
LINGO1	-1.63444	-2.25659	-3.12789	0.0135019	0.128515	-2.64652	1.8696
FGF1	3.34415	-1.38853	3.12626	0.0135358	0.128722	-2.64858	1.86852
KRTCAP3	1.74481	-1.36776	3.12616	0.0135378	0.128722	-2.66921	1.86845
HNRNPR	-0.837268	8.01712	-3.12456	0.0135712	0.128973	-3.55438	1.86738
MAPK1	-0.355475	7.24181	-3.123	0.0136038	0.129215	-3.49772	1.86634
BEGAIN	-1.40312	4.19984	-3.12218	0.0136211	0.129277	-3.22996	1.86579
LRRC37A2	0.474494	3.55508	3.12201	0.0136245	0.129277	-3.18879	1.86568
CDC23	0.344377	6.59432	3.11911	0.0136856	0.129721	-3.46191	1.86374
RP11-147C23.1	-1.93904	-0.547186	-3.1194	0.0136795	0.129721	-2.68186	1.86393
TMEM198	0.943049	3.9386	3.11852	0.0136979	0.12977	-3.0477	1.86335
HINFP	0.828197	3.93561	3.11808	0.0137073	0.129792	-3.03633	1.86305
CCDC62	1.22504	-0.660019	3.11724	0.013725	0.129892	-2.71198	1.86249
ACAA1	0.562365	3.74431	3.11635	0.0137438	0.130003	-3.09641	1.86189
RELL1	-1.22885	3.65294	-3.11566	0.0137584	0.130016	-3.28532	1.86143
ZNF773	0.438406	3.94893	3.11561	0.0137595	0.130016	-3.22633	1.8614
ACTA1	1.76736	-2.77694	3.11403	0.013793	0.130263	-2.66446	1.86034
CBX5	-0.655202	7.44376	-3.1137	0.0137999	0.130263	-3.52168	1.86012
LRIG3	-0.368425	2.22024	-3.11334	0.0138076	0.130268	-3.36936	1.85988
ZFAND2A	1.31983	3.97486	3.11269	0.0138214	0.130331	-3.16157	1.85945
DHCR24	-0.493322	7.6691	-3.11102	0.0138571	0.130599	-3.53911	1.85833
RP11-100E13.1	-1.88563	-0.216766	-3.11013	0.0138761	0.130711	-2.94399	1.85773
C18orf54	-0.955657	3.53522	-3.10823	0.0139169	0.130824	-3.23284	1.85646
CCL20	2.11368	-1.65447	3.10832	0.0139149	0.130824	-2.76054	1.85652
RP11-140A10.3	1.95494	-3.81073	3.10843	0.0139126	0.130824	-2.67152	1.85659
TMEM98	-1.12481	3.11409	-3.10851	0.0139108	0.130824	-3.33786	1.85665
USP22	0.458721	6.10614	3.10733	0.013936	0.130937	-3.33975	1.85586
IDI1	-0.742604	7.33916	-3.10623	0.0139598	0.131092	-3.53882	1.85512
ID1	-0.470932	6.18351	-3.10406	0.0140065	0.131376	-3.49953	1.85367
RAC2	-2.14322	2.94543	-3.10289	0.0140318	0.131376	-3.22525	1.85289
RP11-221N13.3	-2.11588	-2.2057	-3.10284	0.0140329	0.131376	-2.8103	1.85285
SRSF3	-0.650202	8.34568	-3.10376	0.014013	0.131376	-3.58892	1.85347
TGFBR2	-1.4886	4.09227	-3.10282	0.0140333	0.131376	-3.38748	1.85284
TMTC3	-1.09131	6.1453	-3.10311	0.014027	0.131376	-3.49515	1.85303
GPR63	1.10675	1.63554	3.10078	0.0140774	0.131614	-3.00607	1.85148
RAC3	-0.813079	5.22196	-3.10065	0.0140803	0.131614	-3.43947	1.85139
SYT4	1.55936	7.46496	3.10084	0.0140761	0.131614	-3.54287	1.85152
RARS	-0.624606	7.91248	-3.10011	0.014092	0.131655	-3.58518	1.85103
ARMC5	0.528221	3.74786	3.09717	0.0141559	0.132117	-3.15434	1.84906
ULK4	0.584055	2.03094	3.09741	0.0141508	0.132117	-2.96518	1.84922
MIS18BP1	-2.21442	4.65751	-3.09651	0.0141705	0.132185	-3.44691	1.84862
AGPAT5	0.546936	7.30703	3.09584	0.014185	0.132219	-3.52011	1.84817
ALG13	-0.528789	4.91427	-3.09535	0.0141959	0.132219	-3.36059	1.84784
CD5L	-3.25662	-4.58471	-3.09534	0.0141959	0.132219	-2.68908	1.84784
RP11-457M11.2	-0.62192	2.06475	-3.09469	0.0142102	0.132285	-2.97525	1.8474
HIST1H4C	-1.29461	7.32951	-3.09374	0.0142311	0.132412	-3.57318	1.84676
ARHGAP36	1.9799	3.09833	3.09181	0.0142735	0.132604	-2.96363	1.84547
GAS2L1	-1.27969	1.52716	-3.09233	0.014262	0.132604	-3.09386	1.84582
HIST1H2AI	-1.68878	6.58463	-3.09209	0.0142673	0.132604	-3.53921	1.84566
C1QL1	-1.24607	2.2106	-3.09067	0.0142987	0.132702	-2.96652	1.8447
MDK	-0.320642	7.25835	-3.09087	0.0142943	0.132702	-3.56722	1.84484
ADK	-0.980953	5.84752	-3.0888	0.0143399	0.133017	-3.48092	1.84345
C10orf118	-0.620411	4.56851	-3.0875	0.0143688	0.133217	-3.35169	1.84258
DDX60L	-0.458077	4.13538	-3.08659	0.0143889	0.133231	-3.42721	1.84197
TLX3	2.26781	-2.86376	3.08643	0.0143923	0.133231	-2.7099	1.84187
VPS8	0.345965	5.67607	3.08698	0.0143803	0.133231	-3.45242	1.84223
IAH1	-0.835405	4.45011	-3.08515	0.0144209	0.133428	-3.37841	1.84101
NXT2	0.903311	4.13668	3.08408	0.0144447	0.133581	-3.29143	1.84029
RP11-412P11.1	2.49215	-2.35404	3.0818	0.0144955	0.133847	-2.71136	1.83877
RP5-1142A6.8	2.0788	-3.86546	3.08212	0.0144883	0.133847	-2.7128	1.83898
ZNF280B	0.955534	2.87599	3.08191	0.0144932	0.133847	-3.0575	1.83884
RASSF8	-0.677564	5.94054	-3.07998	0.0145364	0.134156	-3.55272	1.83754
FNIP2	0.499012	5.80228	3.07929	0.0145518	0.134162	-3.47633	1.83708
RP1-228H13.5	1.10764	1.39823	3.07947	0.0145479	0.134162	-2.88786	1.8372
CTD-2336O2.1	0.556946	3.13105	3.07892	0.0145603	0.134172	-3.1278	1.83683
GRIA2	2.61935	-0.488602	3.07813	0.0145779	0.134267	-2.73335	1.83631
PLXDC2	1.93447	2.99222	3.07716	0.0145997	0.134343	-2.95433	1.83566
SFXN2	-0.442745	3.96763	-3.07711	0.0146009	0.134343	-3.34113	1.83562
RP11-295K2.3	2.30161	-3.2792	3.07677	0.0146085	0.134345	-2.71379	1.83539
CHADL	2.33659	-3.09833	3.07502	0.0146481	0.134568	-2.71793	1.83422
CTD-2350C19.1	1.30009	-1.21252	3.07456	0.0146585	0.134568	-2.75053	1.83391
TMEM51	-0.735887	4.66595	-3.07525	0.0146429	0.134568	-3.42673	1.83437
TRIP12	-0.441422	8.32176	-3.07439	0.0146622	0.134568	-3.6395	1.8338
C4orf32	-0.974201	4.10899	-3.07343	0.0146841	0.1347	-3.56163	1.83315
C17orf72	-1.09172	-1.58633	-3.06738	0.014822	0.134959	-2.80164	1.82909
CTC-453G23.8	2.1887	-3.62765	3.06775	0.0148134	0.134959	-2.7273	1.82935
DLL4	3.19704	-1.9025	3.07008	0.0147602	0.134959	-2.72173	1.83091
FAM213A	-0.656315	6.76026	-3.06655	0.0148411	0.134959	-3.59039	1.82853
FAM84A	1.26663	0.609079	3.06917	0.014781	0.134959	-2.78539	1.8303
GALNT18	1.17119	-0.0320286	3.0691	0.0147827	0.134959	-2.79952	1.83025
HIST2H2BF	-1.38836	7.12259	-3.06974	0.014768	0.134959	-3.62235	1.83068
IGSF8	0.380098	4.6618	3.06523	0.0148713	0.134959	-3.47145	1.82765
IL33	-3.8996	0.660747	-3.0671	0.0148284	0.134959	-3.18326	1.82891
PARD6G	-0.673334	2.04759	-3.06518	0.0148723	0.134959	-3.33953	1.82762
PPP2R2B	1.87316	3.26438	3.06509	0.0148744	0.134959	-2.92664	1.82756
RNASEL	-2.25477	-0.159627	-3.06619	0.0148492	0.134959	-2.76621	1.8283
RNF168	-0.748079	6.64638	-3.06922	0.0147798	0.134959	-3.56016	1.83033
[truncated: 16,219 more rows]
