# Supplementary material for: Metabolic reprogramming of cancer cells by JMJD6-mediated pre-mRNA splicing associated with therapeutic response to splicing inhibitor
Source: eLife. 2024 Mar 15;12:RP90993. doi: 10.7554/eLife.90993 (PMC10942784; doi:10.7554/eLife.90993)
Supplement: Figure 3—source data 2. [file elife-90993-fig3-data2.xlsx]

## Sheet: Reactome BE2C
Gene Set Name	Description	p-value	FDR q-value
REACTOME_DEVELOPMENTAL_BIOLOGY	Developmental Biology	8.84e-13	5.96e-10
REACTOME_AXON_GUIDANCE	Axon guidance	1.33e-09	4.49e-07
REACTOME_IMMUNE_SYSTEM	Immune System	1.36e-07	3.06e-05
REACTOME_METABOLISM_OF_CARBOHYDRATES	Metabolism of carbohydrates	1.22e-06	0.000182
REACTOME_SIGNALLING_BY_NGF	Signalling by NGF	1.35e-06	0.000182
REACTOME_TRANSMEMBRANE_TRANSPORT_OF_SMALL_MOLECULES	Transmembrane transport of small molecules	3.18e-06	0.000357
REACTOME_CELL_CYCLE	Cell Cycle	4.18e-06	0.000403
REACTOME_HEMOSTASIS	Hemostasis	1.74e-05	0.00147
REACTOME_CELL_CYCLE_MITOTIC	Cell Cycle, Mitotic	3.26e-05	0.00244
REACTOME_HEPARAN_SULFATE_HEPARIN_HS_GAG_METABOLISM	Heparan sulfate/heparin (HS-GAG) metabolism	6.18e-05	0.00417
REACTOME_CIRCADIAN_CLOCK	Circadian Clock	6.9e-05	0.00423
REACTOME_NGF_SIGNALLING_VIA_TRKA_FROM_THE_PLASMA_MEMBRANE	NGF signalling via TRKA from the plasma membrane	9.02e-05	0.00506
REACTOME_GLYCOSAMINOGLYCAN_METABOLISM	Glycosaminoglycan metabolism	0.000116	0.00601
REACTOME_L1CAM_INTERACTIONS	L1CAM interactions	0.000145	0.00695
REACTOME_NCAM1_INTERACTIONS	NCAM1 interactions	0.000155	0.00695
REACTOME_NCAM_SIGNALING_FOR_NEURITE_OUT_GROWTH	NCAM signaling for neurite out-growth	0.000199	0.0084
REACTOME_INTERACTION_BETWEEN_L1_AND_ANKYRINS	Interaction between L1 and Ankyrins	0.000216	0.00856
REACTOME_NRAGE_SIGNALS_DEATH_THROUGH_JNK	NRAGE signals death through JNK	0.000248	0.00909
REACTOME_RORA_ACTIVATES_CIRCADIAN_EXPRESSION	RORA Activates Circadian Expression	0.000256	0.00909
REACTOME_CYTOKINE_SIGNALING_IN_IMMUNE_SYSTEM	Cytokine Signaling in Immune system	0.000277	0.00933
REACTOME_NEURONAL_SYSTEM	Neuronal System	0.000372	0.0107
REACTOME_NFKB_AND_MAP_KINASES_ACTIVATION_MEDIATED_BY_TLR4_SIGNALING_REPERTOIRE	NFkB and MAP kinases activation mediated by TLR4 signaling repertoire	0.00038	0.0107
REACTOME_TRANSCRIPTIONAL_REGULATION_OF_WHITE_ADIPOCYTE_DIFFERENTIATION	Transcriptional Regulation of White Adipocyte Differentiation	0.00038	0.0107
REACTOME_FACTORS_INVOLVED_IN_MEGAKARYOCYTE_DEVELOPMENT_AND_PLATELET_PRODUCTION	Factors involved in megakaryocyte development and platelet production	0.00038	0.0107
REACTOME_G_ALPHA1213_SIGNALLING_EVENTS	G alpha (12/13) signalling events	0.000441	0.0109
REACTOME_TRIF_MEDIATED_TLR3_SIGNALING	TRIF mediated TLR3 signaling	0.000441	0.0109
REACTOME_CS_DS_DEGRADATION	CS/DS degradation	0.000457	0.0109
REACTOME_CHONDROITIN_SULFATE_DERMATAN_SULFATE_METABOLISM	Chondroitin sulfate/dermatan sulfate metabolism	0.00046	0.0109
REACTOME_PPARA_ACTIVATES_GENE_EXPRESSION	PPARA Activates Gene Expression	0.000468	0.0109
REACTOME_MAP_KINASE_ACTIVATION_IN_TLR_CASCADE	MAP kinase activation in TLR cascade	0.000505	0.0114
REACTOME_TETRAHYDROBIOPTERIN_BH4_SYNTHESIS_RECYCLING_SALVAGE_AND_REGULATION	Tetrahydrobiopterin (BH4) synthesis, recycling, salvage and regulation	0.000588	0.0127
REACTOME_MAPK_TARGETS_NUCLEAR_EVENTS_MEDIATED_BY_MAP_KINASES	MAPK targets/ Nuclear events mediated by MAP kinases	0.000621	0.0127
REACTOME_SIGNALING_BY_ROBO_RECEPTOR	Signaling by Robo receptor	0.000621	0.0127
REACTOME_CELL_EXTRACELLULAR_MATRIX_INTERACTIONS	Cell-extracellular matrix interactions	0.000742	0.0147
REACTOME_SIGNALING_BY_RHO_GTPASES	Signaling by Rho GTPases	0.000768	0.0148
REACTOME_SCFSKP2_MEDIATED_DEGRADATION_OF_P27_P21	SCF(Skp2)-mediated degradation of p27/p21	0.000854	0.016
REACTOME_SEMA3A_PAK_DEPENDENT_AXON_REPULSION	Sema3A PAK dependent Axon repulsion	0.000918	0.0164
REACTOME_P53_DEPENDENT_G1_DNA_DAMAGE_RESPONSE	p53-Dependent G1 DNA Damage Response	0.000926	0.0164
REACTOME_TOLL_RECEPTOR_CASCADES	Toll Receptor Cascades	0.000991	0.017
REACTOME_SIGNAL_TRANSDUCTION_BY_L1	Signal transduction by L1	0.00101	0.017
REACTOME_CELL_DEATH_SIGNALLING_VIA_NRAGE_NRIF_AND_NADE	Cell death signalling via NRAGE, NRIF and NADE	0.00117	0.0192
REACTOME_SIGNALING_BY_PDGF	Signaling by PDGF	0.0012	0.0193
REACTOME_BMAL1_CLOCK_NPAS2_ACTIVATES_CIRCADIAN_EXPRESSION	BMAL1:CLOCK/NPAS2 Activates Circadian Expression	0.00125	0.0194
REACTOME_INTERFERON_SIGNALING	Interferon Signaling	0.00129	0.0194
REACTOME_INNATE_IMMUNE_SYSTEM	in Innate Immune System	0.0013	0.0194
REACTOME_CELL_CYCLE_CHECKPOINTS	Cell Cycle Checkpoints	0.00132	0.0194
REACTOME_ACTIVATED_TLR4_SIGNALLING	Activated TLR4 signalling	0.00147	0.0211
REACTOME_SIGNALING_BY_FGFR_IN_DISEASE	Signaling by FGFR in disease	0.00152	0.0213
REACTOME_CYCLIN_E_ASSOCIATED_EVENTS_DURING_G1_S_TRANSITION_	Cyclin E associated events during G1/S transition	0.00168	0.0231
REACTOME_SIGNALING_BY_FGFR1_FUSION_MUTANTS	Signaling by FGFR1 fusion mutants	0.00188	0.025
REACTOME_HOST_INTERACTIONS_OF_HIV_FACTORS	Host Interactions of HIV factors	0.00189	0.025
REACTOME_ENOS_ACTIVATION_AND_REGULATION	eNOS activation and regulation	0.00219	0.0284
REACTOME_ADAPTIVE_IMMUNE_SYSTEM	Adaptive Immune System	0.00239	0.0304
REACTOME_CHONDROITIN_SULFATE_BIOSYNTHESIS	Chondroitin sulfate biosynthesis	0.00253	0.031
REACTOME_LIGAND_GATED_ION_CHANNEL_TRANSPORT	Ligand-gated ion channel transport	0.00253	0.031
REACTOME_SIGNALING_BY_EGFR_IN_CANCER	Signaling by EGFR in Cancer	0.00328	0.0391
REACTOME_CIRCADIAN_REPRESSION_OF_EXPRESSION_BY_REV_ERBA	Circadian Repression of Expression by REV-ERBA	0.0033	0.0391
REACTOME_TRAF6_MEDIATED_INDUCTION_OF_NFKB_AND_MAP_KINASES_UPON_TLR7_8_OR_9_ACTIVATION	TRAF6 mediated induction of NFkB and MAP kinases upon TLR7/8 or 9 activation	0.00353	0.0407
REACTOME_NUCLEAR_EVENTS_KINASE_AND_TRANSCRIPTION_FACTOR_ACTIVATION	Nuclear Events (kinase and transcription factor activation)	0.00374	0.0407
REACTOME_PYRIMIDINE_METABOLISM	Pyrimidine metabolism	0.00374	0.0407
REACTOME_YAP1_AND_WWTR1_TAZ_STIMULATED_GENE_EXPRESSION	YAP1- and WWTR1 (TAZ)-stimulated gene expression	0.00374	0.0407
REACTOME_G1_S_TRANSITION	G1/S Transition	0.00375	0.0407
REACTOME_A_TETRASACCHARIDE_LINKER_SEQUENCE_IS_REQUIRED_FOR_GAG_SYNTHESIS	A tetrasaccharide linker sequence is required for GAG synthesis	0.00421	0.043
REACTOME_FANCONI_ANEMIA_PATHWAY	Fanconi Anemia pathway	0.00421	0.043
REACTOME_REGULATION_OF_HYPOXIA_INDUCIBLE_FACTOR_HIF_BY_OXYGEN	Regulation of Hypoxia-inducible Factor (HIF) by Oxygen	0.00421	0.043
REACTOME_SMOOTH_MUSCLE_CONTRACTION	Smooth Muscle Contraction	0.00421	0.043
REACTOME_MITOTIC_G2_G2_M_PHASES	Mitotic G2-G2/M phases	0.00438	0.0434
REACTOME_P75_NTR_RECEPTOR_MEDIATED_SIGNALLING	p75 NTR receptor-mediated signalling	0.00438	0.0434
REACTOME_MYD88_MAL_CASCADE_INITIATED_ON_PLASMA_MEMBRANE	MyD88:Mal cascade initiated on plasma membrane	0.00486	0.0475
REACTOME_SLC_MEDIATED_TRANSMEMBRANE_TRANSPORT	SLC-mediated transmembrane transport	0.00495	0.0477
REACTOME_CELL_CELL_COMMUNICATION	Genes involved in Cell-Cell communication	0.00524	0.0486
REACTOME_RECYCLING_PATHWAY_OF_L1	Genes involved in Recycling pathway of L1	0.00525	0.0486
REACTOME_METABOLISM_OF_AMINO_ACIDS_AND_DERIVATIVES	Genes involved in Metabolism of amino acids and derivatives	0.00527	0.0486

## Sheet: kegg BE2C
Gene Set Name	Description	p-value	FDR q-value
KEGG_AXON_GUIDANCE	Axon guidance	1.23e-06	0.000229
KEGG_PATHWAYS_IN_CANCER	Pathways in cancer	0.000135	0.00938
KEGG_MAPK_SIGNALING_PATHWAY	MAPK signaling pathway	0.00025	0.00938
KEGG_P53_SIGNALING_PATHWAY	p53 signaling pathway	0.000302	0.00938
KEGG_CELL_CYCLE	Cell cycle	0.000309	0.00938
KEGG_FOLATE_BIOSYNTHESIS	Folate biosynthesis	0.000346	0.00938
KEGG_GLYCOSAMINOGLYCAN_BIOSYNTHESIS_HEPARAN_SULFATE	Glycosaminoglycan biosynthesis - heparan sulfate	0.000353	0.00938
KEGG_REGULATION_OF_ACTIN_CYTOSKELETON	Regulation of actin cytoskeleton	0.000639	0.0149
KEGG_ERBB_SIGNALING_PATHWAY	ErbB signaling pathway	0.00104	0.0215
KEGG_PROSTATE_CANCER	Prostate cancer	0.00117	0.0218
KEGG_PYRIMIDINE_METABOLISM	Pyrimidine metabolism	0.00192	0.0311
KEGG_TIGHT_JUNCTION	Tight junction	0.00206	0.0311
KEGG_RENAL_CELL_CARCINOMA	Renal cell carcinoma	0.00233	0.0311
KEGG_INSULIN_SIGNALING_PATHWAY	Insulin signaling pathway	0.00234	0.0311
KEGG_CHRONIC_MYELOID_LEUKEMIA	Chronic myeloid leukemia	0.0028	0.0337
KEGG_GLYCOSAMINOGLYCAN_BIOSYNTHESIS_CHONDROITIN_SULFATE	Glycosaminoglycan biosynthesis - chondroitin sulfate	0.0029	0.0337
KEGG_OOCYTE_MEIOSIS	Oocyte meiosis	0.00409	0.0447
KEGG_JAK_STAT_SIGNALING_PATHWAY	Jak-STAT signaling pathway	0.00462	0.0478

## Sheet: BIOCARTA BE2C
Gene Set Name	Description	p-value	FDR q-value
BIOCARTA_MAPK_PATHWAY	MAPKinase Signaling Pathway	2.31e-06	0.000501
BIOCARTA_P38MAPK_PATHWAY	p38 MAPK Signaling Pathway	0.000175	0.0111
BIOCARTA_HER2_PATHWAY	Role of ERBB2 in Signal Transduction and Oncology	0.00018	0.0111
BIOCARTA_G2_PATHWAY	Cell Cycle: G2/M Checkpoint	0.000256	0.0111
BIOCARTA_TPO_PATHWAY	TPO Signaling Pathway	0.000256	0.0111
BIOCARTA_VDR_PATHWAY	Control of Gene Expression by Vitamin D Receptor	0.000457	0.0147
BIOCARTA_G1_PATHWAY	Cell Cycle: G1/S Check Point	0.000474	0.0147
BIOCARTA_CARM1_PATHWAY	Transcription Regulation by Methyltransferase of CARM1	0.000588	0.016
BIOCARTA_EGF_PATHWAY	EGF Signaling Pathway	0.000706	0.017
BIOCARTA_PDGF_PATHWAY	PDGF Signaling Pathway	0.000798	0.0173
BIOCARTA_BCELLSURVIVAL_PATHWAY	B Cell Survival Pathway	0.00112	0.0221
BIOCARTA_MET_PATHWAY	Signaling of Hepatocyte Growth Factor Receptor	0.00139	0.0231
BIOCARTA_INTEGRIN_PATHWAY	Integrin Signaling Pathway	0.00154	0.0231
BIOCARTA_NGF_PATHWAY	Nerve growth factor pathway (NGF)	0.0016	0.0231
BIOCARTA_SPRY_PATHWAY	Sprouty regulation of tyrosine kinase signals	0.0016	0.0231
BIOCARTA_IGF1_PATHWAY	IGF-1 Signaling Pathway	0.00253	0.0326
BIOCARTA_IL6_PATHWAY	IL 6 signaling pathway	0.0029	0.0326
BIOCARTA_INSULIN_PATHWAY	Insulin Signaling Pathway	0.0029	0.0326
BIOCARTA_KERATINOCYTE_PATHWAY	Keratinocyte Differentiation	0.00313	0.0326
BIOCARTA_IGF1R_PATHWAY	Multiple antiapoptotic pathways from IGF-1R signaling lead to BAD phosphorylation	0.0033	0.0326
BIOCARTA_PTDINS_PATHWAY	Phosphoinositides and their downstream targets.	0.0033	0.0326
BIOCARTA_RAC1_PATHWAY	Rac 1 cell motility signaling pathway	0.0033	0.0326
BIOCARTA_ECM_PATHWAY	Erk and PI-3 Kinase Are Necessary for Collagen Binding in Corneal Epithelia	0.00374	0.0353
BIOCARTA_RACCYCD_PATHWAY	Influence of Ras and Rho proteins on G1 to S Transition	0.00471	0.0426
BIOCARTA_CREB_PATHWAY	Transcription factor CREB and its extracellular signals	0.00525	0.0456
BIOCARTA_ERK_PATHWAY	Erk1/Erk2 Mapk Signaling pathway	0.00582	0.0486

## Sheet: REACTOME AS
Gene Set Name	Description	p-value	FDR q-value
REACTOME_HEMOSTASIS	Hemostasis	1.96e-12	1.32e-09
REACTOME_METABOLISM_OF_PROTEINS	Metabolism of proteins	2.58e-08	8.7e-06
REACTOME_TRANSMEMBRANE_TRANSPORT_OF_SMALL_MOLECULES	Transmembrane transport of small molecules	6.5e-08	1.46e-05
REACTOME_PROCESSING_OF_CAPPED_INTRON_CONTAINING_PRE_MRNA	Processing of Capped Intron-Containing Pre-mRNA	9.73e-08	1.64e-05
REACTOME_MRNA_PROCESSING	mRNA Processing	1.25e-07	1.69e-05
REACTOME_MRNA_SPLICING	mRNA Splicing	1.78e-07	2e-05
REACTOME_CELL_EXTRACELLULAR_MATRIX_INTERACTIONS	Cell-extracellular matrix interactions	2.99e-07	2.88e-05
REACTOME_IMMUNE_SYSTEM	Immune System	5.33e-07	4.49e-05
REACTOME_DIABETES_PATHWAYS	Diabetes pathways	1.65e-06	0.000124
REACTOME_BASIGIN_INTERACTIONS	Basigin interactions	3.32e-06	0.000224
REACTOME_CELL_CYCLE_MITOTIC	Cell Cycle, Mitotic	4.4e-06	0.000254
REACTOME_PLATELET_ACTIVATION_SIGNALING_AND_AGGREGATION	Platelet activation, signaling and aggregation	4.55e-06	0.000254
REACTOME_CLEAVAGE_OF_GROWING_TRANSCRIPT_IN_THE_TERMINATION_REGION_	Cleavage of Growing Transcript in the Termination Region	4.89e-06	0.000254
REACTOME_CELL_SURFACE_INTERACTIONS_AT_THE_VASCULAR_WALL	Cell surface interactions at the vascular wall	5.57e-06	0.000262
REACTOME_MRNA_SPLICING_MINOR_PATHWAY	mRNA Splicing - Minor Pathway	5.84e-06	0.000262
REACTOME_SIGNALING_BY_NOTCH	Signaling by NOTCH	1.85e-05	0.000778
REACTOME_TRANSPORT_OF_MATURE_TRANSCRIPT_TO_CYTOPLASM	ransport of Mature Transcript to Cytoplasm	2.36e-05	0.000937
REACTOME_CELL_CYCLE	Cell Cycle	2.91e-05	0.00109
REACTOME_SLC_MEDIATED_TRANSMEMBRANE_TRANSPORT	SLC-mediated transmembrane transport	3.1e-05	0.0011
REACTOME_METABOLISM_OF_CARBOHYDRATES	Metabolism of carbohydrates	4.23e-05	0.00143
REACTOME_AMINO_ACID_TRANSPORT_ACROSS_THE_PLASMA_MEMBRANE	Amino acid transport across the plasma membrane	5.31e-05	0.00168
REACTOME_METABOLISM_OF_RNA	Metabolism of RNA	5.67e-05	0.00168
REACTOME_CELL_JUNCTION_ORGANIZATION	Cell junction organization	5.72e-05	0.00168
REACTOME_COMPLEMENT_CASCADE	Complement cascade	6.41e-05	0.0018
REACTOME_CELL_CELL_COMMUNICATION	Cell-Cell communication	7.65e-05	0.00206
REACTOME_METABOLISM_OF_LIPIDS_AND_LIPOPROTEINS	Metabolism of lipids and lipoproteins	8.06e-05	0.00209
REACTOME_ION_TRANSPORT_BY_P_TYPE_ATPASES	Ion transport by P-type ATPases	9.16e-05	0.00229
REACTOME_AMINO_ACID_AND_OLIGOPEPTIDE_SLC_TRANSPORTERS	Amino acid and oligopeptide SLC transporters	9.73e-05	0.00234
REACTOME_DNA_REPLICATION	DNA Replication	0.000107	0.00244
REACTOME_MRNA_3_END_PROCESSING	mRNA 3'-end processing	0.000109	0.00244
REACTOME_TRANSLATION	Translation	0.000144	0.00312
REACTOME_3_UTR_MEDIATED_TRANSLATIONAL_REGULATION	3' -UTR-mediated translational regulation	0.000163	0.00334
REACTOME_METABOLISM_OF_AMINO_ACIDS_AND_DERIVATIVES	Metabolism of amino acids and derivatives	0.000164	0.00334
REACTOME_AXON_GUIDANCE	Axon guidance	0.000171	0.00339
REACTOME_ADAPTIVE_IMMUNE_SYSTEM	Adaptive Immune System	0.000212	0.00402
REACTOME_SIGNALING_BY_RHO_GTPASES	Signaling by Rho GTPases	0.000215	0.00402
REACTOME_METABOLISM_OF_MRNA	Metabolism of mRNA	0.00023	0.00418
REACTOME_INITIAL_TRIGGERING_OF_COMPLEMENT	Initial triggering of complement	0.000351	0.00622
REACTOME_INTEGRIN_CELL_SURFACE_INTERACTIONS	Integrin cell surface interactions	0.000365	0.0063
REACTOME_UNFOLDED_PROTEIN_RESPONSE	Unfolded Protein Response	0.000398	0.0067
REACTOME_G2_M_CHECKPOINTS	G2/M Checkpoints	0.000451	0.00742
REACTOME_MITOTIC_M_M_G1_PHASES	Mitotic M-M/G1 phases	0.000483	0.00775
REACTOME_RNA_POL_II_TRANSCRIPTION	RNA Polymerase II Transcription	0.000555	0.0087
REACTOME_NONSENSE_MEDIATED_DECAY_ENHANCED_BY_THE_EXON_JUNCTION_COMPLEX	Nonsense Mediated Decay Enhanced by the Exon Junction Complex	0.000593	0.00909
REACTOME_DEVELOPMENTAL_BIOLOGY	Developmental Biology	0.000619	0.00927
REACTOME_INFLUENZA_LIFE_CYCLE	Influenza Life Cycle	0.000646	0.00946
REACTOME_SRP_DEPENDENT_COTRANSLATIONAL_PROTEIN_TARGETING_TO_MEMBRANE	SRP-dependent cotranslational protein targeting to membrane	0.000689	0.00988
REACTOME_RESPONSE_TO_ELEVATED_PLATELET_CYTOSOLIC_CA2_	Response to elevated platelet cytosolic Ca2+	0.000814	0.0114
REACTOME_GLYCOSAMINOGLYCAN_METABOLISM	Glycosaminoglycan metabolism	0.00083	0.0114
REACTOME_SIGNALING_BY_NOTCH1	Signaling by NOTCH1	0.000909	0.0123
REACTOME_TRANSPORT_OF_INORGANIC_CATIONS_ANIONS_AND_AMINO_ACIDS_OLIGOPEPTIDES	Transport of inorganic cations/anions and amino acids/oligopeptides	0.00117	0.0154
REACTOME_SIGNALING_BY_HIPPO	Signaling by Hippo	0.00127	0.0164
REACTOME_ION_CHANNEL_TRANSPORT	Ion channel transport	0.00133	0.0169
REACTOME_INFLUENZA_VIRAL_RNA_TRANSCRIPTION_AND_REPLICATION	Influenza Viral RNA Transcription and Replication	0.00144	0.0176
REACTOME_ACTIVATION_OF_ATR_IN_RESPONSE_TO_REPLICATION_STRESS	Activation of ATR in response to replication stress	0.00144	0.0176
REACTOME_SLBP_DEPENDENT_PROCESSING_OF_REPLICATION_DEPENDENT_HISTONE_PRE_MRNAS	SLBP Dependent Processing of Replication-Dependent Histone Pre-mRNAs	0.00156	0.0188
REACTOME_PLATELET_ADHESION_TO_EXPOSED_COLLAGEN	Platelet Adhesion to exposed collagen	0.00205	0.0242
REACTOME_DARPP_32_EVENTS	DARPP-32 events	0.00208	0.0242
REACTOME_PEPTIDE_CHAIN_ELONGATION	Peptide chain elongation	0.00226	0.0258
REACTOME_REGULATORY_RNA_PATHWAYS	Regulatory RNA pathways	0.00242	0.0272
REACTOME_PRE_NOTCH_EXPRESSION_AND_PROCESSING	Pre-NOTCH Expression and Processing	0.00279	0.0309
REACTOME_NCAM_SIGNALING_FOR_NEURITE_OUT_GROWTH	NCAM signaling for neurite out-growth	0.00291	0.0317
REACTOME_L1CAM_INTERACTIONS	L1CAM interactions	0.00301	0.0322
REACTOME_MITOTIC_PROMETAPHASE	Mitotic Prometaphase	0.00321	0.0332
REACTOME_HYALURONAN_METABOLISM	Hyaluronan metabolism	0.00328	0.0332
REACTOME_REGULATION_OF_COMPLEMENT_CASCADE	Regulation of Complement cascade	0.00328	0.0332
REACTOME_POST_TRANSLATIONAL_PROTEIN_MODIFICATION	Post-translational protein modification	0.0033	0.0332
REACTOME_ACTIVATION_OF_CHAPERONE_GENES_BY_XBP1S	Activation of Chaperone Genes by XBP1(S)	0.0034	0.0337
REACTOME_G1_S_TRANSITION	G1/S Transition	0.00352	0.0344
REACTOME_GLYCOLYSIS	Glycolysis	0.00364	0.0346
REACTOME_PRE_NOTCH_TRANSCRIPTION_AND_TRANSLATION	Pre-NOTCH Transcription and Translation	0.00364	0.0346
REACTOME_MHC_CLASS_II_ANTIGEN_PRESENTATION	MHC class II antigen presentation	0.00412	0.0386
REACTOME_TCA_CYCLE_AND_RESPIRATORY_ELECTRON_TRANSPORT	The citric acid (TCA) cycle and respiratory electron transport	0.00429	0.0396
REACTOME_CHYLOMICRON_MEDIATED_LIPID_TRANSPORT	Chylomicron-mediated lipid transport	0.00488	0.0438
REACTOME_REGULATION_OF_INSULIN_LIKE_GROWTH_FACTOR_IGF_ACTIVITY_BY_INSULIN_LIKE_GROWTH_FACTOR_BINDING_PROTEINS_IGFBPS	Regulation of Insulin-like Growth Factor (IGF) Activity by Insulin-like Growth Factor Binding Proteins (IGFBPs)	0.00488	0.0438
REACTOME_METABOLISM_OF_NUCLEOTIDES	Metabolism of nucleotides	0.00524	0.0464
Gene/Gene Set Overlap Matrix
Entrez Gene Id	Gene Description	REACTOME_TRANSMEMBRANE_TRANSPORT_OF_SMALL_MOLECULES	REACTOME_PROCESSING_OF_CAPPED_INTRON_CONTAINING_PRE_MRNA	REACTOME_MRNA_PROCESSING	REACTOME_MRNA_SPLICING	REACTOME_CELL_EXTRACELLULAR_MATRIX_INTERACTIONS	REACTOME_IMMUNE_SYSTEM	REACTOME_DIABETES_PATHWAYS	REACTOME_BASIGIN_INTERACTIONS	REACTOME_CELL_CYCLE_MITOTIC	REACTOME_PLATELET_ACTIVATION_SIGNALING_AND_AGGREGATION	REACTOME_CLEAVAGE_OF_GROWING_TRANSCRIPT_IN_THE_TERMINATION_REGION_	REACTOME_CELL_SURFACE_INTERACTIONS_AT_THE_VASCULAR_WALL	REACTOME_MRNA_SPLICING_MINOR_PATHWAY	REACTOME_SIGNALING_BY_NOTCH	REACTOME_TRANSPORT_OF_MATURE_TRANSCRIPT_TO_CYTOPLASM	REACTOME_CELL_CYCLE	REACTOME_SLC_MEDIATED_TRANSMEMBRANE_TRANSPORT	REACTOME_METABOLISM_OF_CARBOHYDRATES	REACTOME_AMINO_ACID_TRANSPORT_ACROSS_THE_PLASMA_MEMBRANE	REACTOME_METABOLISM_OF_RNA	REACTOME_CELL_JUNCTION_ORGANIZATION	REACTOME_COMPLEMENT_CASCADE	REACTOME_CELL_CELL_COMMUNICATION	REACTOME_METABOLISM_OF_LIPIDS_AND_LIPOPROTEINS	REACTOME_ION_TRANSPORT_BY_P_TYPE_ATPASES	REACTOME_AMINO_ACID_AND_OLIGOPEPTIDE_SLC_TRANSPORTERS	REACTOME_DNA_REPLICATION	REACTOME_MRNA_3_END_PROCESSING	REACTOME_TRANSLATION	REACTOME_3_UTR_MEDIATED_TRANSLATIONAL_REGULATION	REACTOME_METABOLISM_OF_AMINO_ACIDS_AND_DERIVATIVES	REACTOME_AXON_GUIDANCE	REACTOME_ADAPTIVE_IMMUNE_SYSTEM	REACTOME_SIGNALING_BY_RHO_GTPASES	REACTOME_METABOLISM_OF_MRNA	REACTOME_INITIAL_TRIGGERING_OF_COMPLEMENT	REACTOME_INTEGRIN_CELL_SURFACE_INTERACTIONS	REACTOME_UNFOLDED_PROTEIN_RESPONSE	REACTOME_G2_M_CHECKPOINTS	REACTOME_MITOTIC_M_M_G1_PHASES	REACTOME_RNA_POL_II_TRANSCRIPTION	REACTOME_NONSENSE_MEDIATED_DECAY_ENHANCED_BY_THE_EXON_JUNCTION_COMPLEX	REACTOME_DEVELOPMENTAL_BIOLOGY	REACTOME_INFLUENZA_LIFE_CYCLE	REACTOME_SRP_DEPENDENT_COTRANSLATIONAL_PROTEIN_TARGETING_TO_MEMBRANE	REACTOME_RESPONSE_TO_ELEVATED_PLATELET_CYTOSOLIC_CA2_	REACTOME_GLYCOSAMINOGLYCAN_METABOLISM	REACTOME_SIGNALING_BY_NOTCH1
5329	plasminogen activator, urokinase receptor
23657	solute carrier family 7 (anionic amino acid transporter light chain, xc- system), member 11	REACTOME_TRANSMEMBRANE_TRANSPORT_OF_SMALL_MOLECULES							REACTOME_BASIGIN_INTERACTIONS				REACTOME_CELL_SURFACE_INTERACTIONS_AT_THE_VASCULAR_WALL					REACTOME_SLC_MEDIATED_TRANSMEMBRANE_TRANSPORT		REACTOME_AMINO_ACID_TRANSPORT_ACROSS_THE_PLASMA_MEMBRANE							REACTOME_AMINO_ACID_AND_OLIGOPEPTIDE_SLC_TRANSPORTERS
6520	solute carrier family 3 (activators of dibasic and neutral amino acid transport), member 2	REACTOME_TRANSMEMBRANE_TRANSPORT_OF_SMALL_MOLECULES							REACTOME_BASIGIN_INTERACTIONS				REACTOME_CELL_SURFACE_INTERACTIONS_AT_THE_VASCULAR_WALL					REACTOME_SLC_MEDIATED_TRANSMEMBRANE_TRANSPORT		REACTOME_AMINO_ACID_TRANSPORT_ACROSS_THE_PLASMA_MEMBRANE							REACTOME_AMINO_ACID_AND_OLIGOPEPTIDE_SLC_TRANSPORTERS
8140	solute carrier family 7 (amino acid transporter light chain, L system), member 5	REACTOME_TRANSMEMBRANE_TRANSPORT_OF_SMALL_MOLECULES							REACTOME_BASIGIN_INTERACTIONS				REACTOME_CELL_SURFACE_INTERACTIONS_AT_THE_VASCULAR_WALL					REACTOME_SLC_MEDIATED_TRANSMEMBRANE_TRANSPORT		REACTOME_AMINO_ACID_TRANSPORT_ACROSS_THE_PLASMA_MEMBRANE							REACTOME_AMINO_ACID_AND_OLIGOPEPTIDE_SLC_TRANSPORTERS
9123	solute carrier family 16, member 3 (monocarboxylic acid transporter 4)	REACTOME_TRANSMEMBRANE_TRANSPORT_OF_SMALL_MOLECULES							REACTOME_BASIGIN_INTERACTIONS				REACTOME_CELL_SURFACE_INTERACTIONS_AT_THE_VASCULAR_WALL					REACTOME_SLC_MEDIATED_TRANSMEMBRANE_TRANSPORT
481	ATPase, Na+/K+ transporting, beta 1 polypeptide	REACTOME_TRANSMEMBRANE_TRANSPORT_OF_SMALL_MOLECULES							REACTOME_BASIGIN_INTERACTIONS				REACTOME_CELL_SURFACE_INTERACTIONS_AT_THE_VASCULAR_WALL													REACTOME_ION_TRANSPORT_BY_P_TYPE_ATPASES
2785	guanine nucleotide binding protein (G protein), gamma 3	REACTOME_TRANSMEMBRANE_TRANSPORT_OF_SMALL_MOLECULES									REACTOME_PLATELET_ACTIVATION_SIGNALING_AND_AGGREGATION
5573	protein kinase, cAMP-dependent, regulatory, type I, alpha (tissue specific extinguisher 1)	REACTOME_TRANSMEMBRANE_TRANSPORT_OF_SMALL_MOLECULES
2778	GNAS complex locus	REACTOME_TRANSMEMBRANE_TRANSPORT_OF_SMALL_MOLECULES
3688	integrin, beta 1 (fibronectin receptor, beta polypeptide, antigen CD29 includes MDF2, MSK12)					REACTOME_CELL_EXTRACELLULAR_MATRIX_INTERACTIONS	REACTOME_IMMUNE_SYSTEM		REACTOME_BASIGIN_INTERACTIONS				REACTOME_CELL_SURFACE_INTERACTIONS_AT_THE_VASCULAR_WALL									REACTOME_CELL_JUNCTION_ORGANIZATION		REACTOME_CELL_CELL_COMMUNICATION									REACTOME_AXON_GUIDANCE	REACTOME_ADAPTIVE_IMMUNE_SYSTEM				REACTOME_INTEGRIN_CELL_SURFACE_INTERACTIONS						REACTOME_DEVELOPMENTAL_BIOLOGY
6714	v-src sarcoma (Schmidt-Ruppin A-2) viral oncogene homolog (avian)						REACTOME_IMMUNE_SYSTEM				REACTOME_PLATELET_ACTIVATION_SIGNALING_AND_AGGREGATION		REACTOME_CELL_SURFACE_INTERACTIONS_AT_THE_VASCULAR_WALL											REACTOME_CELL_CELL_COMMUNICATION									REACTOME_AXON_GUIDANCE	REACTOME_ADAPTIVE_IMMUNE_SYSTEM				REACTOME_INTEGRIN_CELL_SURFACE_INTERACTIONS						REACTOME_DEVELOPMENTAL_BIOLOGY
948	CD36 molecule (thrombospondin receptor)						REACTOME_IMMUNE_SYSTEM				REACTOME_PLATELET_ACTIVATION_SIGNALING_AND_AGGREGATION														REACTOME_METABOLISM_OF_LIPIDS_AND_LIPOPROTEINS									REACTOME_ADAPTIVE_IMMUNE_SYSTEM										REACTOME_DEVELOPMENTAL_BIOLOGY			REACTOME_RESPONSE_TO_ELEVATED_PLATELET_CYTOSOLIC_CA2_
11069	Rap guanine nucleotide exchange factor (GEF) 4						REACTOME_IMMUNE_SYSTEM				REACTOME_PLATELET_ACTIVATION_SIGNALING_AND_AGGREGATION																							REACTOME_ADAPTIVE_IMMUNE_SYSTEM				REACTOME_INTEGRIN_CELL_SURFACE_INTERACTIONS
10000	v-akt murine thymoma viral oncogene homolog 3 (protein kinase B, gamma)						REACTOME_IMMUNE_SYSTEM				REACTOME_PLATELET_ACTIVATION_SIGNALING_AND_AGGREGATION																							REACTOME_ADAPTIVE_IMMUNE_SYSTEM										REACTOME_DEVELOPMENTAL_BIOLOGY
1525	coxsackie virus and adenovirus receptor						REACTOME_IMMUNE_SYSTEM						REACTOME_CELL_SURFACE_INTERACTIONS_AT_THE_VASCULAR_WALL																					REACTOME_ADAPTIVE_IMMUNE_SYSTEM
3831	kinesin light chain 1						REACTOME_IMMUNE_SYSTEM																											REACTOME_ADAPTIVE_IMMUNE_SYSTEM
56992	kinesin family member 15						REACTOME_IMMUNE_SYSTEM																											REACTOME_ADAPTIVE_IMMUNE_SYSTEM
5478	peptidylprolyl isomerase A (cyclophilin A)								REACTOME_BASIGIN_INTERACTIONS		REACTOME_PLATELET_ACTIVATION_SIGNALING_AND_AGGREGATION		REACTOME_CELL_SURFACE_INTERACTIONS_AT_THE_VASCULAR_WALL																																		REACTOME_RESPONSE_TO_ELEVATED_PLATELET_CYTOSOLIC_CA2_
1277	collagen, type I, alpha 1										REACTOME_PLATELET_ACTIVATION_SIGNALING_AND_AGGREGATION		REACTOME_CELL_SURFACE_INTERACTIONS_AT_THE_VASCULAR_WALL																				REACTOME_AXON_GUIDANCE					REACTOME_INTEGRIN_CELL_SURFACE_INTERACTIONS						REACTOME_DEVELOPMENTAL_BIOLOGY
2335	fibronectin 1										REACTOME_PLATELET_ACTIVATION_SIGNALING_AND_AGGREGATION		REACTOME_CELL_SURFACE_INTERACTIONS_AT_THE_VASCULAR_WALL																									REACTOME_INTEGRIN_CELL_SURFACE_INTERACTIONS									REACTOME_RESPONSE_TO_ELEVATED_PLATELET_CYTOSOLIC_CA2_
408	arrestin, beta 1										REACTOME_PLATELET_ACTIVATION_SIGNALING_AND_AGGREGATION				REACTOME_SIGNALING_BY_NOTCH																																		REACTOME_SIGNALING_BY_NOTCH1
5054	serpin peptidase inhibitor, clade E (nexin, plasminogen activator inhibitor type 1), member 1										REACTOME_PLATELET_ACTIVATION_SIGNALING_AND_AGGREGATION																																				REACTOME_RESPONSE_TO_ELEVATED_PLATELET_CYTOSOLIC_CA2_
1191	clusterin										REACTOME_PLATELET_ACTIVATION_SIGNALING_AND_AGGREGATION																																				REACTOME_RESPONSE_TO_ELEVATED_PLATELET_CYTOSOLIC_CA2_
29106	secretogranin III										REACTOME_PLATELET_ACTIVATION_SIGNALING_AND_AGGREGATION																																				REACTOME_RESPONSE_TO_ELEVATED_PLATELET_CYTOSOLIC_CA2_
3920	lysosomal-associated membrane protein 2										REACTOME_PLATELET_ACTIVATION_SIGNALING_AND_AGGREGATION																																				REACTOME_RESPONSE_TO_ELEVATED_PLATELET_CYTOSOLIC_CA2_
6814	syntaxin binding protein 3										REACTOME_PLATELET_ACTIVATION_SIGNALING_AND_AGGREGATION																																				REACTOME_RESPONSE_TO_ELEVATED_PLATELET_CYTOSOLIC_CA2_
1608	diacylglycerol kinase, gamma 90kDa										REACTOME_PLATELET_ACTIVATION_SIGNALING_AND_AGGREGATION
221955	diacylglycerol lipase, beta										REACTOME_PLATELET_ACTIVATION_SIGNALING_AND_AGGREGATION
8526	diacylglycerol kinase, epsilon 64kDa										REACTOME_PLATELET_ACTIVATION_SIGNALING_AND_AGGREGATION
3673	integrin, alpha 2 (CD49B, alpha 2 subunit of VLA-2 receptor)																																REACTOME_AXON_GUIDANCE					REACTOME_INTEGRIN_CELL_SURFACE_INTERACTIONS						REACTOME_DEVELOPMENTAL_BIOLOGY
10019	SH2B adaptor protein 3
2624	GATA binding protein 2
2625	GATA binding protein 3
50808	adenylate kinase 3
9927	mitofusin 2
2982	guanylate cyclase 1, soluble, alpha 3
7804	low density lipoprotein receptor-related protein 8, apolipoprotein e receptor
5055	serpin peptidase inhibitor, clade B (ovalbumin), member 2
5328	plasminogen activator, urokinase
1974	eukaryotic translation initiation factor 4A2						REACTOME_IMMUNE_SYSTEM														REACTOME_METABOLISM_OF_RNA									REACTOME_TRANSLATION	REACTOME_3_UTR_MEDIATED_TRANSLATIONAL_REGULATION					REACTOME_METABOLISM_OF_MRNA
23478	SEC11 homolog A (S. cerevisiae)							REACTOME_DIABETES_PATHWAYS																						REACTOME_TRANSLATION																REACTOME_SRP_DEPENDENT_COTRANSLATIONAL_PROTEIN_TARGETING_TO_MEMBRANE
9331	UDP-Gal:betaGlcNAc beta 1,4- galactosyltransferase, polypeptide 6																		REACTOME_METABOLISM_OF_CARBOHYDRATES																													REACTOME_GLYCOSAMINOGLYCAN_METABOLISM
6203	ribosomal protein S9																				REACTOME_METABOLISM_OF_RNA									REACTOME_TRANSLATION	REACTOME_3_UTR_MEDIATED_TRANSLATIONAL_REGULATION					REACTOME_METABOLISM_OF_MRNA							REACTOME_NONSENSE_MEDIATED_DECAY_ENHANCED_BY_THE_EXON_JUNCTION_COMPLEX		REACTOME_INFLUENZA_LIFE_CYCLE	REACTOME_SRP_DEPENDENT_COTRANSLATIONAL_PROTEIN_TARGETING_TO_MEMBRANE
6204	ribosomal protein S10																				REACTOME_METABOLISM_OF_RNA									REACTOME_TRANSLATION	REACTOME_3_UTR_MEDIATED_TRANSLATIONAL_REGULATION					REACTOME_METABOLISM_OF_MRNA							REACTOME_NONSENSE_MEDIATED_DECAY_ENHANCED_BY_THE_EXON_JUNCTION_COMPLEX		REACTOME_INFLUENZA_LIFE_CYCLE	REACTOME_SRP_DEPENDENT_COTRANSLATIONAL_PROTEIN_TARGETING_TO_MEMBRANE
6206	ribosomal protein S12																				REACTOME_METABOLISM_OF_RNA									REACTOME_TRANSLATION	REACTOME_3_UTR_MEDIATED_TRANSLATIONAL_REGULATION					REACTOME_METABOLISM_OF_MRNA							REACTOME_NONSENSE_MEDIATED_DECAY_ENHANCED_BY_THE_EXON_JUNCTION_COMPLEX		REACTOME_INFLUENZA_LIFE_CYCLE	REACTOME_SRP_DEPENDENT_COTRANSLATIONAL_PROTEIN_TARGETING_TO_MEMBRANE
6125	ribosomal protein L5																				REACTOME_METABOLISM_OF_RNA									REACTOME_TRANSLATION	REACTOME_3_UTR_MEDIATED_TRANSLATIONAL_REGULATION					REACTOME_METABOLISM_OF_MRNA							REACTOME_NONSENSE_MEDIATED_DECAY_ENHANCED_BY_THE_EXON_JUNCTION_COMPLEX		REACTOME_INFLUENZA_LIFE_CYCLE	REACTOME_SRP_DEPENDENT_COTRANSLATIONAL_PROTEIN_TARGETING_TO_MEMBRANE
6128	ribosomal protein L6																				REACTOME_METABOLISM_OF_RNA									REACTOME_TRANSLATION	REACTOME_3_UTR_MEDIATED_TRANSLATIONAL_REGULATION					REACTOME_METABOLISM_OF_MRNA							REACTOME_NONSENSE_MEDIATED_DECAY_ENHANCED_BY_THE_EXON_JUNCTION_COMPLEX		REACTOME_INFLUENZA_LIFE_CYCLE	REACTOME_SRP_DEPENDENT_COTRANSLATIONAL_PROTEIN_TARGETING_TO_MEMBRANE
6141	ribosomal protein L18																				REACTOME_METABOLISM_OF_RNA									REACTOME_TRANSLATION	REACTOME_3_UTR_MEDIATED_TRANSLATIONAL_REGULATION					REACTOME_METABOLISM_OF_MRNA							REACTOME_NONSENSE_MEDIATED_DECAY_ENHANCED_BY_THE_EXON_JUNCTION_COMPLEX		REACTOME_INFLUENZA_LIFE_CYCLE	REACTOME_SRP_DEPENDENT_COTRANSLATIONAL_PROTEIN_TARGETING_TO_MEMBRANE
6144	ribosomal protein L21																				REACTOME_METABOLISM_OF_RNA									REACTOME_TRANSLATION	REACTOME_3_UTR_MEDIATED_TRANSLATIONAL_REGULATION					REACTOME_METABOLISM_OF_MRNA							REACTOME_NONSENSE_MEDIATED_DECAY_ENHANCED_BY_THE_EXON_JUNCTION_COMPLEX		REACTOME_INFLUENZA_LIFE_CYCLE	REACTOME_SRP_DEPENDENT_COTRANSLATIONAL_PROTEIN_TARGETING_TO_MEMBRANE
6158	ribosomal protein L28																				REACTOME_METABOLISM_OF_RNA									REACTOME_TRANSLATION	REACTOME_3_UTR_MEDIATED_TRANSLATIONAL_REGULATION					REACTOME_METABOLISM_OF_MRNA							REACTOME_NONSENSE_MEDIATED_DECAY_ENHANCED_BY_THE_EXON_JUNCTION_COMPLEX		REACTOME_INFLUENZA_LIFE_CYCLE	REACTOME_SRP_DEPENDENT_COTRANSLATIONAL_PROTEIN_TARGETING_TO_MEMBRANE
6167	ribosomal protein L37																				REACTOME_METABOLISM_OF_RNA									REACTOME_TRANSLATION	REACTOME_3_UTR_MEDIATED_TRANSLATIONAL_REGULATION					REACTOME_METABOLISM_OF_MRNA							REACTOME_NONSENSE_MEDIATED_DECAY_ENHANCED_BY_THE_EXON_JUNCTION_COMPLEX		REACTOME_INFLUENZA_LIFE_CYCLE	REACTOME_SRP_DEPENDENT_COTRANSLATIONAL_PROTEIN_TARGETING_TO_MEMBRANE
6173	ribosomal protein L36a																				REACTOME_METABOLISM_OF_RNA									REACTOME_TRANSLATION	REACTOME_3_UTR_MEDIATED_TRANSLATIONAL_REGULATION					REACTOME_METABOLISM_OF_MRNA							REACTOME_NONSENSE_MEDIATED_DECAY_ENHANCED_BY_THE_EXON_JUNCTION_COMPLEX		REACTOME_INFLUENZA_LIFE_CYCLE	REACTOME_SRP_DEPENDENT_COTRANSLATIONAL_PROTEIN_TARGETING_TO_MEMBRANE
27335	eukaryotic translation initiation factor 3, subunit K																													REACTOME_TRANSLATION	REACTOME_3_UTR_MEDIATED_TRANSLATIONAL_REGULATION
8668	eukaryotic translation initiation factor 3, subunit I																													REACTOME_TRANSLATION	REACTOME_3_UTR_MEDIATED_TRANSLATIONAL_REGULATION
6748	signal sequence receptor, delta																													REACTOME_TRANSLATION																REACTOME_SRP_DEPENDENT_COTRANSLATIONAL_PROTEIN_TARGETING_TO_MEMBRANE
4351	mannose phosphate isomerase
9945	glutamine-fructose-6-phosphate transaminase 2
27090	ST6 (alpha-N-acetyl-neuraminyl-2,3-beta-galactosyl-1,3)-N-acetylgalactosaminide alpha-2,6-sialyltransferase 4
56667	mucin 13, cell surface associated
2589	UDP-N-acetyl-alpha-D-galactosamine:polypeptide N-acetylgalactosaminyltransferase 1 (GalNAc-T1)
56913	core 1 synthase, glycoprotein-N-acetylgalactosamine 3-beta-galactosyltransferase, 1
4121	mannosidase, alpha, class 1A, member 1
5277	phosphatidylinositol glycan anchor biosynthesis, class A
1725	deoxyhypusine synthase
516	ATP synthase, H+ transporting, mitochondrial Fo complex, subunit C1 (subunit 9)
131118	DnaJ (Hsp40) homolog, subfamily C, member 19
26521	translocase of inner mitochondrial membrane 8 homolog B (yeast)
617	BCS1-like (S. cerevisiae)
9804	translocase of outer mitochondrial membrane 20 homolog (yeast)
10694	chaperonin containing TCP1, subunit 8 (theta)
10471	prefoldin subunit 6
6905	tubulin folding cofactor E
23636	nucleoporin 62kDa	REACTOME_TRANSMEMBRANE_TRANSPORT_OF_SMALL_MOLECULES	REACTOME_PROCESSING_OF_CAPPED_INTRON_CONTAINING_PRE_MRNA	REACTOME_MRNA_PROCESSING			REACTOME_IMMUNE_SYSTEM									REACTOME_TRANSPORT_OF_MATURE_TRANSCRIPT_TO_CYTOPLASM		REACTOME_SLC_MEDIATED_TRANSMEMBRANE_TRANSPORT	REACTOME_METABOLISM_OF_CARBOHYDRATES		REACTOME_METABOLISM_OF_RNA																								REACTOME_INFLUENZA_LIFE_CYCLE
9883	POM121 membrane glycoprotein	REACTOME_TRANSMEMBRANE_TRANSPORT_OF_SMALL_MOLECULES	REACTOME_PROCESSING_OF_CAPPED_INTRON_CONTAINING_PRE_MRNA	REACTOME_MRNA_PROCESSING			REACTOME_IMMUNE_SYSTEM									REACTOME_TRANSPORT_OF_MATURE_TRANSCRIPT_TO_CYTOPLASM		REACTOME_SLC_MEDIATED_TRANSMEMBRANE_TRANSPORT	REACTOME_METABOLISM_OF_CARBOHYDRATES		REACTOME_METABOLISM_OF_RNA																								REACTOME_INFLUENZA_LIFE_CYCLE
6515	solute carrier family 2 (facilitated glucose transporter), member 3	REACTOME_TRANSMEMBRANE_TRANSPORT_OF_SMALL_MOLECULES																REACTOME_SLC_MEDIATED_TRANSMEMBRANE_TRANSPORT	REACTOME_METABOLISM_OF_CARBOHYDRATES
54407	solute carrier family 38, member 2	REACTOME_TRANSMEMBRANE_TRANSPORT_OF_SMALL_MOLECULES																REACTOME_SLC_MEDIATED_TRANSMEMBRANE_TRANSPORT		REACTOME_AMINO_ACID_TRANSPORT_ACROSS_THE_PLASMA_MEMBRANE							REACTOME_AMINO_ACID_AND_OLIGOPEPTIDE_SLC_TRANSPORTERS
81539	solute carrier family 38, member 1	REACTOME_TRANSMEMBRANE_TRANSPORT_OF_SMALL_MOLECULES																REACTOME_SLC_MEDIATED_TRANSMEMBRANE_TRANSPORT		REACTOME_AMINO_ACID_TRANSPORT_ACROSS_THE_PLASMA_MEMBRANE							REACTOME_AMINO_ACID_AND_OLIGOPEPTIDE_SLC_TRANSPORTERS
206358	solute carrier family 36 (proton/amino acid symporter), member 1	REACTOME_TRANSMEMBRANE_TRANSPORT_OF_SMALL_MOLECULES																REACTOME_SLC_MEDIATED_TRANSMEMBRANE_TRANSPORT		REACTOME_AMINO_ACID_TRANSPORT_ACROSS_THE_PLASMA_MEMBRANE							REACTOME_AMINO_ACID_AND_OLIGOPEPTIDE_SLC_TRANSPORTERS
26503	solute carrier family 17 (anion/sugar transporter), member 5	REACTOME_TRANSMEMBRANE_TRANSPORT_OF_SMALL_MOLECULES																REACTOME_SLC_MEDIATED_TRANSMEMBRANE_TRANSPORT									REACTOME_AMINO_ACID_AND_OLIGOPEPTIDE_SLC_TRANSPORTERS
9498	solute carrier family 4, sodium bicarbonate cotransporter, member 8	REACTOME_TRANSMEMBRANE_TRANSPORT_OF_SMALL_MOLECULES																REACTOME_SLC_MEDIATED_TRANSMEMBRANE_TRANSPORT
9194	solute carrier family 16, member 7 (monocarboxylic acid transporter 2)	REACTOME_TRANSMEMBRANE_TRANSPORT_OF_SMALL_MOLECULES																REACTOME_SLC_MEDIATED_TRANSMEMBRANE_TRANSPORT
6530	solute carrier family 6 (neurotransmitter transporter, noradrenalin), member 2	REACTOME_TRANSMEMBRANE_TRANSPORT_OF_SMALL_MOLECULES																REACTOME_SLC_MEDIATED_TRANSMEMBRANE_TRANSPORT
6570	solute carrier family 18 (vesicular monoamine), member 1	REACTOME_TRANSMEMBRANE_TRANSPORT_OF_SMALL_MOLECULES																REACTOME_SLC_MEDIATED_TRANSMEMBRANE_TRANSPORT
27173	solute carrier family 39 (zinc transporter), member 1	REACTOME_TRANSMEMBRANE_TRANSPORT_OF_SMALL_MOLECULES																REACTOME_SLC_MEDIATED_TRANSMEMBRANE_TRANSPORT
9197	solute carrier family 33 (acetyl-CoA transporter), member 1	REACTOME_TRANSMEMBRANE_TRANSPORT_OF_SMALL_MOLECULES																REACTOME_SLC_MEDIATED_TRANSMEMBRANE_TRANSPORT
10057	ATP-binding cassette, sub-family C (CFTR/MRP), member 5	REACTOME_TRANSMEMBRANE_TRANSPORT_OF_SMALL_MOLECULES																	REACTOME_METABOLISM_OF_CARBOHYDRATES																													REACTOME_GLYCOSAMINOGLYCAN_METABOLISM
8714	ATP-binding cassette, sub-family C (CFTR/MRP), member 3	REACTOME_TRANSMEMBRANE_TRANSPORT_OF_SMALL_MOLECULES																							REACTOME_METABOLISM_OF_LIPIDS_AND_LIPOPROTEINS
10079	ATPase, class II, type 9A	REACTOME_TRANSMEMBRANE_TRANSPORT_OF_SMALL_MOLECULES																								REACTOME_ION_TRANSPORT_BY_P_TYPE_ATPASES
10396	ATPase, aminophospholipid transporter (APLT), class I, type 8A, member 1	REACTOME_TRANSMEMBRANE_TRANSPORT_OF_SMALL_MOLECULES																								REACTOME_ION_TRANSPORT_BY_P_TYPE_ATPASES
286410	ATPase, class VI, type 11C	REACTOME_TRANSMEMBRANE_TRANSPORT_OF_SMALL_MOLECULES																								REACTOME_ION_TRANSPORT_BY_P_TYPE_ATPASES
374868	ATPase, class II, type 9B	REACTOME_TRANSMEMBRANE_TRANSPORT_OF_SMALL_MOLECULES																								REACTOME_ION_TRANSPORT_BY_P_TYPE_ATPASES
478	ATPase, Na+/K+ transporting, alpha 3 polypeptide	REACTOME_TRANSMEMBRANE_TRANSPORT_OF_SMALL_MOLECULES																								REACTOME_ION_TRANSPORT_BY_P_TYPE_ATPASES
2512	ferritin, light polypeptide	REACTOME_TRANSMEMBRANE_TRANSPORT_OF_SMALL_MOLECULES
22916	nuclear cap binding protein subunit 2, 20kDa		REACTOME_PROCESSING_OF_CAPPED_INTRON_CONTAINING_PRE_MRNA	REACTOME_MRNA_PROCESSING	REACTOME_MRNA_SPLICING							REACTOME_CLEAVAGE_OF_GROWING_TRANSCRIPT_IN_THE_TERMINATION_REGION_		REACTOME_MRNA_SPLICING_MINOR_PATHWAY		REACTOME_TRANSPORT_OF_MATURE_TRANSCRIPT_TO_CYTOPLASM					REACTOME_METABOLISM_OF_RNA								REACTOME_MRNA_3_END_PROCESSING							REACTOME_METABOLISM_OF_MRNA						REACTOME_RNA_POL_II_TRANSCRIPTION	REACTOME_NONSENSE_MEDIATED_DECAY_ENHANCED_BY_THE_EXON_JUNCTION_COMPLEX
6426	serine/arginine-rich splicing factor 1		REACTOME_PROCESSING_OF_CAPPED_INTRON_CONTAINING_PRE_MRNA	REACTOME_MRNA_PROCESSING	REACTOME_MRNA_SPLICING							REACTOME_CLEAVAGE_OF_GROWING_TRANSCRIPT_IN_THE_TERMINATION_REGION_		REACTOME_MRNA_SPLICING_MINOR_PATHWAY		REACTOME_TRANSPORT_OF_MATURE_TRANSCRIPT_TO_CYTOPLASM													REACTOME_MRNA_3_END_PROCESSING													REACTOME_RNA_POL_II_TRANSCRIPTION
6427	serine/arginine-rich splicing factor 2		REACTOME_PROCESSING_OF_CAPPED_INTRON_CONTAINING_PRE_MRNA	REACTOME_MRNA_PROCESSING	REACTOME_MRNA_SPLICING							REACTOME_CLEAVAGE_OF_GROWING_TRANSCRIPT_IN_THE_TERMINATION_REGION_		REACTOME_MRNA_SPLICING_MINOR_PATHWAY		REACTOME_TRANSPORT_OF_MATURE_TRANSCRIPT_TO_CYTOPLASM													REACTOME_MRNA_3_END_PROCESSING													REACTOME_RNA_POL_II_TRANSCRIPTION
6432	serine/arginine-rich splicing factor 7		REACTOME_PROCESSING_OF_CAPPED_INTRON_CONTAINING_PRE_MRNA	REACTOME_MRNA_PROCESSING	REACTOME_MRNA_SPLICING							REACTOME_CLEAVAGE_OF_GROWING_TRANSCRIPT_IN_THE_TERMINATION_REGION_		REACTOME_MRNA_SPLICING_MINOR_PATHWAY		REACTOME_TRANSPORT_OF_MATURE_TRANSCRIPT_TO_CYTOPLASM													REACTOME_MRNA_3_END_PROCESSING													REACTOME_RNA_POL_II_TRANSCRIPTION
6628	small nuclear ribonucleoprotein polypeptides B and B1		REACTOME_PROCESSING_OF_CAPPED_INTRON_CONTAINING_PRE_MRNA	REACTOME_MRNA_PROCESSING	REACTOME_MRNA_SPLICING							REACTOME_CLEAVAGE_OF_GROWING_TRANSCRIPT_IN_THE_TERMINATION_REGION_		REACTOME_MRNA_SPLICING_MINOR_PATHWAY							REACTOME_METABOLISM_OF_RNA																					REACTOME_RNA_POL_II_TRANSCRIPTION
10189	THO complex 4		REACTOME_PROCESSING_OF_CAPPED_INTRON_CONTAINING_PRE_MRNA	REACTOME_MRNA_PROCESSING	REACTOME_MRNA_SPLICING							REACTOME_CLEAVAGE_OF_GROWING_TRANSCRIPT_IN_THE_TERMINATION_REGION_				REACTOME_TRANSPORT_OF_MATURE_TRANSCRIPT_TO_CYTOPLASM													REACTOME_MRNA_3_END_PROCESSING													REACTOME_RNA_POL_II_TRANSCRIPTION
6430	serine/arginine-rich splicing factor 5		REACTOME_PROCESSING_OF_CAPPED_INTRON_CONTAINING_PRE_MRNA	REACTOME_MRNA_PROCESSING	REACTOME_MRNA_SPLICING							REACTOME_CLEAVAGE_OF_GROWING_TRANSCRIPT_IN_THE_TERMINATION_REGION_				REACTOME_TRANSPORT_OF_MATURE_TRANSCRIPT_TO_CYTOPLASM													REACTOME_MRNA_3_END_PROCESSING													REACTOME_RNA_POL_II_TRANSCRIPTION
5436	polymerase (RNA) II (DNA directed) polypeptide G		REACTOME_PROCESSING_OF_CAPPED_INTRON_CONTAINING_PRE_MRNA	REACTOME_MRNA_PROCESSING	REACTOME_MRNA_SPLICING									REACTOME_MRNA_SPLICING_MINOR_PATHWAY																												REACTOME_RNA_POL_II_TRANSCRIPTION			REACTOME_INFLUENZA_LIFE_CYCLE
10907	thioredoxin-like 4A		REACTOME_PROCESSING_OF_CAPPED_INTRON_CONTAINING_PRE_MRNA	REACTOME_MRNA_PROCESSING	REACTOME_MRNA_SPLICING									REACTOME_MRNA_SPLICING_MINOR_PATHWAY
23451	splicing factor 3b, subunit 1, 155kDa		REACTOME_PROCESSING_OF_CAPPED_INTRON_CONTAINING_PRE_MRNA	REACTOME_MRNA_PROCESSING	REACTOME_MRNA_SPLICING									REACTOME_MRNA_SPLICING_MINOR_PATHWAY
3184	heterogeneous nuclear ribonucleoprotein D (AU-rich element RNA binding protein 1, 37kDa)		REACTOME_PROCESSING_OF_CAPPED_INTRON_CONTAINING_PRE_MRNA	REACTOME_MRNA_PROCESSING	REACTOME_MRNA_SPLICING																REACTOME_METABOLISM_OF_RNA															REACTOME_METABOLISM_OF_MRNA
27316	RNA binding motif protein, X-linked		REACTOME_PROCESSING_OF_CAPPED_INTRON_CONTAINING_PRE_MRNA	REACTOME_MRNA_PROCESSING	REACTOME_MRNA_SPLICING
3178	heterogeneous nuclear ribonucleoprotein A1		REACTOME_PROCESSING_OF_CAPPED_INTRON_CONTAINING_PRE_MRNA	REACTOME_MRNA_PROCESSING	REACTOME_MRNA_SPLICING
3181	heterogeneous nuclear ribonucleoprotein A2/B1		REACTOME_PROCESSING_OF_CAPPED_INTRON_CONTAINING_PRE_MRNA	REACTOME_MRNA_PROCESSING	REACTOME_MRNA_SPLICING
25888	zinc finger protein 473			REACTOME_MRNA_PROCESSING								REACTOME_CLEAVAGE_OF_GROWING_TRANSCRIPT_IN_THE_TERMINATION_REGION_																														REACTOME_RNA_POL_II_TRANSCRIPTION
7408	vasodilator-stimulated phosphoprotein					REACTOME_CELL_EXTRACELLULAR_MATRIX_INTERACTIONS	REACTOME_IMMUNE_SYSTEM															REACTOME_CELL_JUNCTION_ORGANIZATION		REACTOME_CELL_CELL_COMMUNICATION									REACTOME_AXON_GUIDANCE	REACTOME_ADAPTIVE_IMMUNE_SYSTEM										REACTOME_DEVELOPMENTAL_BIOLOGY
9459	Rac/Cdc42 guanine nucleotide exchange factor (GEF) 6					REACTOME_CELL_EXTRACELLULAR_MATRIX_INTERACTIONS																REACTOME_CELL_JUNCTION_ORGANIZATION		REACTOME_CELL_CELL_COMMUNICATION											REACTOME_SIGNALING_BY_RHO_GTPASES
2318	filamin C, gamma					REACTOME_CELL_EXTRACELLULAR_MATRIX_INTERACTIONS																REACTOME_CELL_JUNCTION_ORGANIZATION		REACTOME_CELL_CELL_COMMUNICATION
3987	LIM and senescent cell antigen-like domains 1					REACTOME_CELL_EXTRACELLULAR_MATRIX_INTERACTIONS																REACTOME_CELL_JUNCTION_ORGANIZATION		REACTOME_CELL_CELL_COMMUNICATION
7016	testis-specific kinase 1					REACTOME_CELL_EXTRACELLULAR_MATRIX_INTERACTIONS																REACTOME_CELL_JUNCTION_ORGANIZATION		REACTOME_CELL_CELL_COMMUNICATION
2931	glycogen synthase kinase 3 alpha						REACTOME_IMMUNE_SYSTEM	REACTOME_DIABETES_PATHWAYS																										REACTOME_ADAPTIVE_IMMUNE_SYSTEM					REACTOME_UNFOLDED_PROTEIN_RESPONSE
5698	proteasome (prosome, macropain) subunit, beta type, 9 (large multifunctional peptidase 2)						REACTOME_IMMUNE_SYSTEM			REACTOME_CELL_CYCLE_MITOTIC							REACTOME_CELL_CYCLE				REACTOME_METABOLISM_OF_RNA							REACTOME_DNA_REPLICATION				REACTOME_METABOLISM_OF_AMINO_ACIDS_AND_DERIVATIVES		REACTOME_ADAPTIVE_IMMUNE_SYSTEM		REACTOME_METABOLISM_OF_MRNA					REACTOME_MITOTIC_M_M_G1_PHASES
5707	proteasome (prosome, macropain) 26S subunit, non-ATPase, 1						REACTOME_IMMUNE_SYSTEM			REACTOME_CELL_CYCLE_MITOTIC							REACTOME_CELL_CYCLE				REACTOME_METABOLISM_OF_RNA							REACTOME_DNA_REPLICATION				REACTOME_METABOLISM_OF_AMINO_ACIDS_AND_DERIVATIVES		REACTOME_ADAPTIVE_IMMUNE_SYSTEM		REACTOME_METABOLISM_OF_MRNA					REACTOME_MITOTIC_M_M_G1_PHASES
1781	dynein, cytoplasmic 1, intermediate chain 2						REACTOME_IMMUNE_SYSTEM			REACTOME_CELL_CYCLE_MITOTIC							REACTOME_CELL_CYCLE																	REACTOME_ADAPTIVE_IMMUNE_SYSTEM
718	complement component 3						REACTOME_IMMUNE_SYSTEM																REACTOME_COMPLEMENT_CASCADE											REACTOME_ADAPTIVE_IMMUNE_SYSTEM			REACTOME_INITIAL_TRIGGERING_OF_COMPLEMENT
629	complement factor B						REACTOME_IMMUNE_SYSTEM																REACTOME_COMPLEMENT_CASCADE														REACTOME_INITIAL_TRIGGERING_OF_COMPLEMENT
720	complement component 4A (Rodgers blood group)						REACTOME_IMMUNE_SYSTEM																REACTOME_COMPLEMENT_CASCADE														REACTOME_INITIAL_TRIGGERING_OF_COMPLEMENT
716	complement component 1, s subcomponent						REACTOME_IMMUNE_SYSTEM																REACTOME_COMPLEMENT_CASCADE														REACTOME_INITIAL_TRIGGERING_OF_COMPLEMENT
727	complement component 5						REACTOME_IMMUNE_SYSTEM																REACTOME_COMPLEMENT_CASCADE
730	complement component 7						REACTOME_IMMUNE_SYSTEM																REACTOME_COMPLEMENT_CASCADE
5788	protein tyrosine phosphatase, receptor type, C						REACTOME_IMMUNE_SYSTEM																										REACTOME_AXON_GUIDANCE	REACTOME_ADAPTIVE_IMMUNE_SYSTEM										REACTOME_DEVELOPMENTAL_BIOLOGY
1512	cathepsin H						REACTOME_IMMUNE_SYSTEM																											REACTOME_ADAPTIVE_IMMUNE_SYSTEM
1519	cathepsin O						REACTOME_IMMUNE_SYSTEM																											REACTOME_ADAPTIVE_IMMUNE_SYSTEM
79659	dynein, cytoplasmic 2, heavy chain 1						REACTOME_IMMUNE_SYSTEM																											REACTOME_ADAPTIVE_IMMUNE_SYSTEM
8722	cathepsin F						REACTOME_IMMUNE_SYSTEM																											REACTOME_ADAPTIVE_IMMUNE_SYSTEM
7318	ubiquitin-like modifier activating enzyme 7						REACTOME_IMMUNE_SYSTEM																											REACTOME_ADAPTIVE_IMMUNE_SYSTEM
5909	RAP1 GTPase activating protein						REACTOME_IMMUNE_SYSTEM																											REACTOME_ADAPTIVE_IMMUNE_SYSTEM
8453	cullin 2						REACTOME_IMMUNE_SYSTEM																											REACTOME_ADAPTIVE_IMMUNE_SYSTEM
29126	CD274 molecule						REACTOME_IMMUNE_SYSTEM																											REACTOME_ADAPTIVE_IMMUNE_SYSTEM
10425	ariadne homolog 2 (Drosophila)						REACTOME_IMMUNE_SYSTEM																											REACTOME_ADAPTIVE_IMMUNE_SYSTEM
114088	tripartite motif containing 9						REACTOME_IMMUNE_SYSTEM																											REACTOME_ADAPTIVE_IMMUNE_SYSTEM
27252	kelch-like 20 (Drosophila)						REACTOME_IMMUNE_SYSTEM																											REACTOME_ADAPTIVE_IMMUNE_SYSTEM
1846	dual specificity phosphatase 4						REACTOME_IMMUNE_SYSTEM
1848	dual specificity phosphatase 6						REACTOME_IMMUNE_SYSTEM
841	caspase 8, apoptosis-related cysteine peptidase						REACTOME_IMMUNE_SYSTEM
10010	TRAF family member-associated NFKB activator						REACTOME_IMMUNE_SYSTEM
26007	dihydroxyacetone kinase 2 homolog (S. cerevisiae)						REACTOME_IMMUNE_SYSTEM
10695	canopy 3 homolog (zebrafish)						REACTOME_IMMUNE_SYSTEM
4938	2'-5'-oligoadenylate synthetase 1, 40/46kDa						REACTOME_IMMUNE_SYSTEM
4940	2'-5'-oligoadenylate synthetase 3, 100kDa						REACTOME_IMMUNE_SYSTEM
3459	interferon gamma receptor 1						REACTOME_IMMUNE_SYSTEM
3430	interferon-induced protein 35						REACTOME_IMMUNE_SYSTEM
3554	interleukin 1 receptor, type I						REACTOME_IMMUNE_SYSTEM
54472	toll interacting protein						REACTOME_IMMUNE_SYSTEM
10525	hypoxia up-regulated 1							REACTOME_DIABETES_PATHWAYS																															REACTOME_UNFOLDED_PROTEIN_RESPONSE
11015	KDEL (Lys-Asp-Glu-Leu) endoplasmic reticulum protein retention receptor 3							REACTOME_DIABETES_PATHWAYS																															REACTOME_UNFOLDED_PROTEIN_RESPONSE
3068	hepatoma-derived growth factor							REACTOME_DIABETES_PATHWAYS																															REACTOME_UNFOLDED_PROTEIN_RESPONSE
64061	TSPY-like 2							REACTOME_DIABETES_PATHWAYS																															REACTOME_UNFOLDED_PROTEIN_RESPONSE
3576	interleukin 8							REACTOME_DIABETES_PATHWAYS																															REACTOME_UNFOLDED_PROTEIN_RESPONSE
6347	chemokine (C-C motif) ligand 2							REACTOME_DIABETES_PATHWAYS																															REACTOME_UNFOLDED_PROTEIN_RESPONSE
2081	endoplasmic reticulum to nucleus signaling 1							REACTOME_DIABETES_PATHWAYS																															REACTOME_UNFOLDED_PROTEIN_RESPONSE
9314	Kruppel-like factor 4 (gut)							REACTOME_DIABETES_PATHWAYS																																				REACTOME_DEVELOPMENTAL_BIOLOGY
3487	insulin-like growth factor binding protein 4							REACTOME_DIABETES_PATHWAYS
3488	insulin-like growth factor binding protein 5							REACTOME_DIABETES_PATHWAYS
3489	insulin-like growth factor binding protein 6							REACTOME_DIABETES_PATHWAYS
1363	carboxypeptidase E							REACTOME_DIABETES_PATHWAYS
84515	minichromosome maintenance complex component 8									REACTOME_CELL_CYCLE_MITOTIC							REACTOME_CELL_CYCLE											REACTOME_DNA_REPLICATION												REACTOME_G2_M_CHECKPOINTS	REACTOME_MITOTIC_M_M_G1_PHASES
23595	origin recognition complex, subunit 3									REACTOME_CELL_CYCLE_MITOTIC							REACTOME_CELL_CYCLE											REACTOME_DNA_REPLICATION												REACTOME_G2_M_CHECKPOINTS	REACTOME_MITOTIC_M_M_G1_PHASES
10926	DBF4 homolog (S. cerevisiae)									REACTOME_CELL_CYCLE_MITOTIC							REACTOME_CELL_CYCLE											REACTOME_DNA_REPLICATION												REACTOME_G2_M_CHECKPOINTS	REACTOME_MITOTIC_M_M_G1_PHASES
5985	replication factor C (activator 1) 5, 36.5kDa									REACTOME_CELL_CYCLE_MITOTIC							REACTOME_CELL_CYCLE											REACTOME_DNA_REPLICATION												REACTOME_G2_M_CHECKPOINTS
1058	centromere protein A									REACTOME_CELL_CYCLE_MITOTIC							REACTOME_CELL_CYCLE											REACTOME_DNA_REPLICATION													REACTOME_MITOTIC_M_M_G1_PHASES
57082	cancer susceptibility candidate 5									REACTOME_CELL_CYCLE_MITOTIC							REACTOME_CELL_CYCLE											REACTOME_DNA_REPLICATION													REACTOME_MITOTIC_M_M_G1_PHASES
151246	shugoshin-like 2 (S. pombe)									REACTOME_CELL_CYCLE_MITOTIC							REACTOME_CELL_CYCLE											REACTOME_DNA_REPLICATION													REACTOME_MITOTIC_M_M_G1_PHASES
332	baculoviral IAP repeat containing 5									REACTOME_CELL_CYCLE_MITOTIC							REACTOME_CELL_CYCLE											REACTOME_DNA_REPLICATION													REACTOME_MITOTIC_M_M_G1_PHASES
348235	spindle and kinetochore associated complex subunit 2									REACTOME_CELL_CYCLE_MITOTIC							REACTOME_CELL_CYCLE											REACTOME_DNA_REPLICATION													REACTOME_MITOTIC_M_M_G1_PHASES
54908	coiled-coil domain containing 99									REACTOME_CELL_CYCLE_MITOTIC							REACTOME_CELL_CYCLE											REACTOME_DNA_REPLICATION													REACTOME_MITOTIC_M_M_G1_PHASES
55055	Zwilch, kinetochore associated, homolog (Drosophila)									REACTOME_CELL_CYCLE_MITOTIC							REACTOME_CELL_CYCLE											REACTOME_DNA_REPLICATION													REACTOME_MITOTIC_M_M_G1_PHASES
10714	polymerase (DNA-directed), delta 3, accessory subunit									REACTOME_CELL_CYCLE_MITOTIC							REACTOME_CELL_CYCLE											REACTOME_DNA_REPLICATION
995	cell division cycle 25 homolog C (S. pombe)									REACTOME_CELL_CYCLE_MITOTIC							REACTOME_CELL_CYCLE																							REACTOME_G2_M_CHECKPOINTS
9133	cyclin B2									REACTOME_CELL_CYCLE_MITOTIC							REACTOME_CELL_CYCLE																							REACTOME_G2_M_CHECKPOINTS
7084	thymidine kinase 2, mitochondrial									REACTOME_CELL_CYCLE_MITOTIC							REACTOME_CELL_CYCLE
1719	dihydrofolate reductase									REACTOME_CELL_CYCLE_MITOTIC							REACTOME_CELL_CYCLE
4149	MYC associated factor X									REACTOME_CELL_CYCLE_MITOTIC							REACTOME_CELL_CYCLE
10806	serologically defined colon cancer antigen 8									REACTOME_CELL_CYCLE_MITOTIC							REACTOME_CELL_CYCLE
80321	centrosomal protein 70kDa									REACTOME_CELL_CYCLE_MITOTIC							REACTOME_CELL_CYCLE
10402	ST3 beta-galactoside alpha-2,3-sialyltransferase 6														REACTOME_SIGNALING_BY_NOTCH				REACTOME_METABOLISM_OF_CARBOHYDRATES																													REACTOME_GLYCOSAMINOGLYCAN_METABOLISM
3516	recombination signal binding protein for immunoglobulin kappa J region														REACTOME_SIGNALING_BY_NOTCH																													REACTOME_DEVELOPMENTAL_BIOLOGY					REACTOME_SIGNALING_BY_NOTCH1
23462	hairy/enhancer-of-split related with YRPW motif 1														REACTOME_SIGNALING_BY_NOTCH																																		REACTOME_SIGNALING_BY_NOTCH1
7089	transducin-like enhancer of split 2 (E(sp1) homolog, Drosophila)														REACTOME_SIGNALING_BY_NOTCH																																		REACTOME_SIGNALING_BY_NOTCH1
9734	histone deacetylase 9														REACTOME_SIGNALING_BY_NOTCH																																		REACTOME_SIGNALING_BY_NOTCH1
57534	mindbomb homolog 1 (Drosophila)														REACTOME_SIGNALING_BY_NOTCH																																		REACTOME_SIGNALING_BY_NOTCH1
92737	delta/notch-like EGF repeat containing														REACTOME_SIGNALING_BY_NOTCH																																		REACTOME_SIGNALING_BY_NOTCH1
23112	trinucleotide repeat containing 6B														REACTOME_SIGNALING_BY_NOTCH
57690	trinucleotide repeat containing 6C														REACTOME_SIGNALING_BY_NOTCH
4854	notch 3														REACTOME_SIGNALING_BY_NOTCH
55320	MIS18 binding protein 1																REACTOME_CELL_CYCLE
25777	Sad1 and UNC84 domain containing 2																REACTOME_CELL_CYCLE
3161	hyaluronan-mediated motility receptor (RHAMM)																		REACTOME_METABOLISM_OF_CARBOHYDRATES																													REACTOME_GLYCOSAMINOGLYCAN_METABOLISM
3037	hyaluronan synthase 2																		REACTOME_METABOLISM_OF_CARBOHYDRATES																													REACTOME_GLYCOSAMINOGLYCAN_METABOLISM
10082	glypican 6																		REACTOME_METABOLISM_OF_CARBOHYDRATES																													REACTOME_GLYCOSAMINOGLYCAN_METABOLISM
6383	syndecan 2																		REACTOME_METABOLISM_OF_CARBOHYDRATES																													REACTOME_GLYCOSAMINOGLYCAN_METABOLISM
3423	iduronate 2-sulfatase																		REACTOME_METABOLISM_OF_CARBOHYDRATES																													REACTOME_GLYCOSAMINOGLYCAN_METABOLISM
50515	carbohydrate (chondroitin 4) sulfotransferase 11																		REACTOME_METABOLISM_OF_CARBOHYDRATES																													REACTOME_GLYCOSAMINOGLYCAN_METABOLISM
230	aldolase C, fructose-bisphosphate																		REACTOME_METABOLISM_OF_CARBOHYDRATES
26330	glyceraldehyde-3-phosphate dehydrogenase, spermatogenic																		REACTOME_METABOLISM_OF_CARBOHYDRATES
5208	6-phosphofructo-2-kinase/fructose-2,6-biphosphatase 2																		REACTOME_METABOLISM_OF_CARBOHYDRATES
5213	phosphofructokinase, muscle																		REACTOME_METABOLISM_OF_CARBOHYDRATES
2203	fructose-1,6-bisphosphatase 1																		REACTOME_METABOLISM_OF_CARBOHYDRATES
56006	smg-9 homolog, nonsense mediated mRNA decay factor (C. elegans)																				REACTOME_METABOLISM_OF_RNA															REACTOME_METABOLISM_OF_MRNA							REACTOME_NONSENSE_MEDIATED_DECAY_ENHANCED_BY_THE_EXON_JUNCTION_COMPLEX
55802	DCP1 decapping enzyme homolog A (S. cerevisiae)																				REACTOME_METABOLISM_OF_RNA															REACTOME_METABOLISM_OF_MRNA
1004	cadherin 6, type 2, K-cadherin (fetal kidney)																					REACTOME_CELL_JUNCTION_ORGANIZATION		REACTOME_CELL_CELL_COMMUNICATION
1005	cadherin 7, type 2																					REACTOME_CELL_JUNCTION_ORGANIZATION		REACTOME_CELL_CELL_COMMUNICATION
64403	cadherin 24, type 2																					REACTOME_CELL_JUNCTION_ORGANIZATION		REACTOME_CELL_CELL_COMMUNICATION
8976	Wiskott-Aldrich syndrome-like																							REACTOME_CELL_CELL_COMMUNICATION									REACTOME_AXON_GUIDANCE											REACTOME_DEVELOPMENTAL_BIOLOGY
25937	WW domain containing transcription regulator 1																								REACTOME_METABOLISM_OF_LIPIDS_AND_LIPOPROTEINS
5499	protein phosphatase 1, catalytic subunit, alpha isozyme																								REACTOME_METABOLISM_OF_LIPIDS_AND_LIPOPROTEINS
348	apolipoprotein E																								REACTOME_METABOLISM_OF_LIPIDS_AND_LIPOPROTEINS
26119	low density lipoprotein receptor adaptor protein 1																								REACTOME_METABOLISM_OF_LIPIDS_AND_LIPOPROTEINS
4547	microsomal triglyceride transfer protein																								REACTOME_METABOLISM_OF_LIPIDS_AND_LIPOPROTEINS
56895	1-acylglycerol-3-phosphate O-acyltransferase 4 (lysophosphatidic acid acyltransferase, delta)																								REACTOME_METABOLISM_OF_LIPIDS_AND_LIPOPROTEINS
54675	cardiolipin synthase 1																								REACTOME_METABOLISM_OF_LIPIDS_AND_LIPOPROTEINS
1040	CDP-diacylglycerol synthase (phosphatidate cytidylyltransferase) 1																								REACTOME_METABOLISM_OF_LIPIDS_AND_LIPOPROTEINS
56261	glycerophosphocholine phosphodiesterase GDE1 homolog (S. cerevisiae)																								REACTOME_METABOLISM_OF_LIPIDS_AND_LIPOPROTEINS
9791	phosphatidylserine synthase 1																								REACTOME_METABOLISM_OF_LIPIDS_AND_LIPOPROTEINS
55331	alkaline ceramidase 3																								REACTOME_METABOLISM_OF_LIPIDS_AND_LIPOPROTEINS
81537	sphingosine-1-phosphate phosphatase 1																								REACTOME_METABOLISM_OF_LIPIDS_AND_LIPOPROTEINS
4758	sialidase 1 (lysosomal sialidase)																								REACTOME_METABOLISM_OF_LIPIDS_AND_LIPOPROTEINS
56624	N-acylsphingosine amidohydrolase (non-lysosomal ceramidase) 2																								REACTOME_METABOLISM_OF_LIPIDS_AND_LIPOPROTEINS
55300	phosphatidylinositol 4-kinase type 2 beta																								REACTOME_METABOLISM_OF_LIPIDS_AND_LIPOPROTEINS
2224	farnesyl diphosphate synthase																								REACTOME_METABOLISM_OF_LIPIDS_AND_LIPOPROTEINS
3422	isopentenyl-diphosphate delta isomerase 1																								REACTOME_METABOLISM_OF_LIPIDS_AND_LIPOPROTEINS
3930	lamin B receptor																								REACTOME_METABOLISM_OF_LIPIDS_AND_LIPOPROTEINS
4862	neuronal PAS domain protein 2																								REACTOME_METABOLISM_OF_LIPIDS_AND_LIPOPROTEINS
27063	ankyrin repeat domain 1 (cardiac muscle)																								REACTOME_METABOLISM_OF_LIPIDS_AND_LIPOPROTEINS
64834	ELOVL fatty acid elongase 1																								REACTOME_METABOLISM_OF_LIPIDS_AND_LIPOPROTEINS
5095	propionyl CoA carboxylase, alpha polypeptide																								REACTOME_METABOLISM_OF_LIPIDS_AND_LIPOPROTEINS
5264	phytanoyl-CoA 2-hydroxylase																								REACTOME_METABOLISM_OF_LIPIDS_AND_LIPOPROTEINS
2744	glutaminase																															REACTOME_METABOLISM_OF_AMINO_ACIDS_AND_DERIVATIVES
55256	acireductone dioxygenase 1																															REACTOME_METABOLISM_OF_AMINO_ACIDS_AND_DERIVATIVES
6303	spermidine/spermine N1-acetyltransferase 1																															REACTOME_METABOLISM_OF_AMINO_ACIDS_AND_DERIVATIVES
4329	aldehyde dehydrogenase 6 family, member A1																															REACTOME_METABOLISM_OF_AMINO_ACIDS_AND_DERIVATIVES
586	branched chain amino-acid transaminase 1, cytosolic																															REACTOME_METABOLISM_OF_AMINO_ACIDS_AND_DERIVATIVES
1644	dopa decarboxylase (aromatic L-amino acid decarboxylase)																															REACTOME_METABOLISM_OF_AMINO_ACIDS_AND_DERIVATIVES
56267	cysteine conjugate-beta lyase 2																															REACTOME_METABOLISM_OF_AMINO_ACIDS_AND_DERIVATIVES
1159	creatine kinase, mitochondrial 1B																															REACTOME_METABOLISM_OF_AMINO_ACIDS_AND_DERIVATIVES
2593	guanidinoacetate N-methyltransferase																															REACTOME_METABOLISM_OF_AMINO_ACIDS_AND_DERIVATIVES
384	arginase, type II																															REACTOME_METABOLISM_OF_AMINO_ACIDS_AND_DERIVATIVES
445	argininosuccinate synthase 1																															REACTOME_METABOLISM_OF_AMINO_ACIDS_AND_DERIVATIVES
548596	creatine kinase, mitochondrial 1A																															REACTOME_METABOLISM_OF_AMINO_ACIDS_AND_DERIVATIVES
2260	fibroblast growth factor receptor 1																																REACTOME_AXON_GUIDANCE											REACTOME_DEVELOPMENTAL_BIOLOGY
782	calcium channel, voltage-dependent, beta 1 subunit																																REACTOME_AXON_GUIDANCE											REACTOME_DEVELOPMENTAL_BIOLOGY
1299	collagen, type IX, alpha 3																																REACTOME_AXON_GUIDANCE											REACTOME_DEVELOPMENTAL_BIOLOGY
2675	GDNF family receptor alpha 2																																REACTOME_AXON_GUIDANCE											REACTOME_DEVELOPMENTAL_BIOLOGY
288	ankyrin 3, node of Ranvier (ankyrin G)																																REACTOME_AXON_GUIDANCE											REACTOME_DEVELOPMENTAL_BIOLOGY
6326	sodium channel, voltage-gated, type II, alpha subunit																																REACTOME_AXON_GUIDANCE											REACTOME_DEVELOPMENTAL_BIOLOGY
214	activated leukocyte cell adhesion molecule																																REACTOME_AXON_GUIDANCE											REACTOME_DEVELOPMENTAL_BIOLOGY
5362	plexin A2																																REACTOME_AXON_GUIDANCE											REACTOME_DEVELOPMENTAL_BIOLOGY
9353	slit homolog 2 (Drosophila)																																REACTOME_AXON_GUIDANCE											REACTOME_DEVELOPMENTAL_BIOLOGY
1894	epithelial cell transforming sequence 2 oncogene																																		REACTOME_SIGNALING_BY_RHO_GTPASES
25791	neuronal guanine nucleotide exchange factor																																		REACTOME_SIGNALING_BY_RHO_GTPASES
29	active BCR-related gene																																		REACTOME_SIGNALING_BY_RHO_GTPASES
158763	Rho GTPase activating protein 36																																		REACTOME_SIGNALING_BY_RHO_GTPASES
397	Rho GDP dissociation inhibitor (GDI) beta																																		REACTOME_SIGNALING_BY_RHO_GTPASES
51306	family with sequence similarity 13, member B																																		REACTOME_SIGNALING_BY_RHO_GTPASES
58504	Rho GTPase activating protein 22																																		REACTOME_SIGNALING_BY_RHO_GTPASES
91614	DEP domain containing 7																																		REACTOME_SIGNALING_BY_RHO_GTPASES
93663	Rho GTPase activating protein 18																																		REACTOME_SIGNALING_BY_RHO_GTPASES
7448	vitronectin																																					REACTOME_INTEGRIN_CELL_SURFACE_INTERACTIONS
8516	integrin, alpha 8																																					REACTOME_INTEGRIN_CELL_SURFACE_INTERACTIONS
154796	angiomotin
23286	WW and C2 domain containing 1
51421	angiomotin like 2
5144	phosphodiesterase 4D, cAMP-specific
5532	protein phosphatase 3, catalytic subunit, beta isozyme
23405	dicer 1, ribonuclease type III
5163	pyruvate dehydrogenase kinase, isozyme 1
3418	isocitrate dehydrogenase 2 (NADP+), mitochondrial
3420	isocitrate dehydrogenase 3 (NAD+) beta
509	ATP synthase, H+ transporting, mitochondrial F1 complex, gamma polypeptide 1
126328	NADH dehydrogenase (ubiquinone) 1 alpha subcomplex, 11, 14.7kDa
4701	NADH dehydrogenase (ubiquinone) 1 alpha subcomplex, 7, 14.5kDa
7385	ubiquinol-cytochrome c reductase core protein II
4907	5'-nucleotidase, ecto (CD73)
1890	thymidine phosphorylase
10606	phosphoribosylaminoimidazole carboxylase, phosphoribosylaminoimidazole succinocarboxamide synthetase
159	adenylosuccinate synthase
26289	adenylate kinase 5
7432	vasoactive intestinal peptide
7434	vasoactive intestinal peptide receptor 2
623	bradykinin receptor B1
4923	neurotensin receptor 1 (high affinity)
6863	tachykinin, precursor 1
3357	5-hydroxytryptamine (serotonin) receptor 2B
10287	regulator of G-protein signaling 19
2869	G protein-coupled receptor kinase 5
6387	chemokine (C-X-C motif) ligand 12
6364	chemokine (C-C motif) ligand 20
6354	chemokine (C-C motif) ligand 7
2264	fibroblast growth factor receptor 4
8569	MAP kinase interacting serine/threonine kinase 1
133	adrenomedullin
5746	parathyroid hormone 2 receptor
26575	regulator of G-protein signaling 17
8224	synapsin III
83988	neurocalcin delta
2893	glutamate receptor, ionotrophic, AMPA 4
1141	cholinergic receptor, nicotinic, beta 2 (neuronal)
55799	calcium channel, voltage-dependent, alpha 2/delta subunit 3
5805	6-pyruvoyltetrahydropterin synthase
56479	potassium voltage-gated channel, KQT-like subfamily, member 5
3783	potassium intermediate/small conductance calcium-activated channel, subfamily N, member 4
6809	syntaxin 3
2067	excision repair cross-complementing rodent repair deficiency, complementation group 1 (includes overlapping antisense sequence)
675	breast cancer 2, early onset
83990	BRCA1 interacting protein C-terminal helicase 1
5980	REV3-like, catalytic subunit of DNA polymerase zeta (yeast)
7048	transforming growth factor, beta receptor II (70/80kDa)
9372	zinc finger, FYVE domain containing 9
7168	tropomyosin 1 (alpha)
7170	tropomyosin 3
800	caldesmon 1
6778	signal transducer and activator of transcription 6, interleukin-4 induced
7019	transcription factor A, mitochondrial
8034	solute carrier family 25 (mitochondrial carrier; Graves disease autoantigen), member 16
9054	NFS1 nitrogen fixation 1 homolog (S. cerevisiae)
8837	CASP8 and FADD-like apoptosis regulator
1294	collagen, type VII, alpha 1
84570	collagen, type XXV, alpha 1
7025	nuclear receptor subfamily 2, group F, member 1
10793	zinc finger protein 273
121274	zinc finger protein 641
163087	zinc finger protein 383
27300	zinc finger protein 544
57693	zinc finger protein 317
79027	zinc finger protein 655
9422	zinc finger protein 264
112399	egl nine homolog 3 (C. elegans)
10667	phenylalanyl-tRNA synthetase 2, mitochondrial
80222	threonyl-tRNA synthetase 2, mitochondrial (putative)
10056	phenylalanyl-tRNA synthetase, beta subunit
26018	leucine-rich repeats and immunoglobulin-like domains 1
1612	death-associated protein kinase 1
660	BMX non-receptor tyrosine kinase
8301	phosphatidylinositol binding clathrin assembly protein
11267	SNF8, ESCRT-II complex subunit, homolog (S. cerevisiae)
3643	insulin receptor
113612	cytochrome P450, family 2, subfamily U, polypeptide 1
55902	acyl-CoA synthetase short-chain family member 2
10007	glucosamine-6-phosphate deaminase 1
100113407	transmembrane protein 170B
100129427	uncharacterized LOC100129427
100129620	uncharacterized LOC100129620
100131205	ribosomal protein L21 pseudogene 28
100132406	neuroblastoma breakpoint family, member 10
100287171	WAS protein family homolog 1
100505741	spermatogenesis associated 1
10051	structural maintenance of chromosomes 4
10076	protein tyrosine phosphatase, receptor type, U
10078	tumor suppressing subtransferable candidate 4
10085	EGF-like repeats and discoidin I-like domains 3
10156	RAS p21 protein activator 4
10160	FERM, RhoGEF (ARHGEF) and pleckstrin domain protein 1 (chondrocyte-derived)
10198	M-phase phosphoprotein 9
10208	ubiquitin specific peptidase like 1
10234	leucine rich repeat containing 17
10290	SPEG complex locus
1033	cyclin-dependent kinase inhibitor 3
10370	Cbp/p300-interacting transactivator, with Glu/Asp-rich carboxy-terminal domain, 2
10399	guanine nucleotide binding protein (G protein), beta polypeptide 2-like 1
10437	interferon, gamma-inducible protein 30
10457	glycoprotein (transmembrane) nmb
10553	HIV-1 Tat interactive protein 2, 30kDa
1062	centromere protein E, 312kDa
10622	polymerase (RNA) III (DNA directed) polypeptide G (32kD)
10629	TAF6-like RNA polymerase II, p300/CBP-associated factor (PCAF)-associated factor, 65kDa
1063	centromere protein F, 350/400kDa (mitosin)
10657	KH domain containing, RNA binding, signal transduction associated 1
10699	corin, serine peptidase
1073	cofilin 2 (muscle)
10745	putative homeodomain transcription factor 1
10767	HBS1-like (S. cerevisiae)
10785	WD repeat domain 4
10802	SEC24 family, member A (S. cerevisiae)
10807	serologically defined colon cancer antigen 3
10882	complement component 1, q subcomponent-like 1
10904	bladder cancer associated protein
10915	transcription elongation regulator 1
10987	COP9 constitutive photomorphogenic homolog subunit 5 (Arabidopsis)
11102	ribonuclease P/MRP 14kDa subunit
11113	citron (rho-interacting, serine/threonine kinase 21)
11156	protein tyrosine phosphatase type IVA, member 3
11199	annexin A10
11201	polymerase (DNA directed) iota
11230	PRA1 domain family, member 2
11244	zinc fingers and homeoboxes 1
11273	ataxin 2-like
114757	cytoglobin
114804	ring finger protein 157
114815	sortilin-related VPS10 domain containing receptor 1
114881	oxysterol binding protein-like 7
114897	C1q and tumor necrosis factor related protein 1
115294	protein-L-isoaspartate (D-aspartate) O-methyltransferase domain containing 1
1182	chloride channel 3
118672	phosphoseryl-tRNA kinase
124491	transmembrane protein 170A
124808	coiled-coil domain containing 43
125144	C17orf76 antisense RNA 1 (non-protein coding)
126282	tumor necrosis factor, alpha-induced protein 8-like 1
1263	polo-like kinase 3
126375	zinc finger protein 792
126731	chromosome 1 open reading frame 96
126823	kelch domain containing 9
1271	ciliary neurotrophic factor receptor
127262	tumor protein p63 regulated 1-like
128272	Rho guanine nucleotide exchange factor (GEF) 19
129138	ankyrin repeat domain 54
129303	transmembrane protein 150A
129446	xin actin-binding repeat containing 2
130340	adaptor-related protein complex 1, sigma 3 subunit
130612	transmembrane protein 198
130814	PQ loop repeat containing 3
130872	AHA1, activator of heat shock 90kDa protein ATPase homolog 2 (yeast)
130888	F-box protein 36
131873	collagen, type VI, alpha 6
133015	PARK2 co-regulated-like
133686	NAD kinase domain containing 1
134957	syntaxin binding protein 5 (tomosyn)
1390	cAMP responsive element modulator
1396	cysteine-rich protein 1 (intestinal)
139716	GRB2-associated binding protein 3
140733	MACRO domain containing 2
140876	family with sequence similarity 65, member C
143686	sestrin 3
145567	tetratricopeptide repeat domain 7B
1465	cysteine and glycine-rich protein 1
146691	target of myb1-like 2 (chicken)
147991	dpy-19-like 3 (C. elegans)
148206	zinc finger protein 714
148327	cAMP responsive element binding protein 3-like 4
148398	sterile alpha motif domain containing 11
1486	chitobiase, di-N-acetyl-
148789	beta-1,3-N-acetylgalactosaminyltransferase 2
149175	mannosidase, endo-alpha-like
150468	cytoskeleton associated protein 2-like
151963	Mab-21 domain containing 2
152006	ring finger protein 38
152815	THAP domain containing 6
153090	DAB2 interacting protein
157680	vacuolar protein sorting 13 homolog B (yeast)
158234	RNA (guanine-9-) methyltransferase domain containing 3
158866	zinc finger, DHHC-type containing 15
160335	transmembrane and tetratricopeptide repeat containing 2
160518	DENN/MADD domain containing 5B
163404	lipid phosphate phosphatase-related protein type 5
1636	angiotensin I converting enzyme (peptidyl-dipeptidase A) 1
164312	leucine rich repeat neuronal 4
165	AE binding protein 1
166	amino-terminal enhancer of split
166614	doublecortin-like kinase 2
166793	zinc finger and BTB domain containing 49
167153	PAP associated domain containing 4
171023	additional sex combs like 1 (Drosophila)
1742	discs, large homolog 4 (Drosophila)
1820	AT rich interactive domain 3A (BRIGHT-like)
1847	dual specificity phosphatase 5
1889	endothelin converting enzyme 1
1893	extracellular matrix protein 1
1951	cadherin, EGF LAG seven-pass G-type receptor 3 (flamingo homolog, Drosophila)
196394	antagonist of mitotic exit network 1 homolog (S. cerevisiae)
196792	family with sequence similarity 24, member B
1969	EPH receptor A2
197335	WD repeat domain 90
1996	ELAV (embryonic lethal, abnormal vision, Drosophila)-like 4 (Hu antigen D)
199746	U2 small nuclear RNA auxiliary factor 1-like 4
200030	neuroblastoma breakpoint family, member 11
2009	echinoderm microtubule associated protein like 1
201134	centrosomal protein 112kDa
2017	cortactin
201895	chromosome 4 open reading frame 34
201965	RWD domain containing 4
2022	endoglin
203197	chromosome 9 open reading frame 91
2048	EPH receptor B2
205	adenylate kinase 4
219285	sterile alpha motif domain containing 9-like
2195	FAT tumor suppressor homolog 1 (Drosophila)
2199	fibulin 2
220	aldehyde dehydrogenase 1 family, member A3
220906	uncharacterized LOC220906
220963	solute carrier family 16, member 9 (monocarboxylic acid transporter 9)
221061	family with sequence similarity 171, member A1
221336	BEN domain containing 6
2218	fukutin
221981	thrombospondin, type I, domain containing 7A
222235	F-box and leucine-rich repeat protein 13
222255	ataxin 7-like 1
2259	fibroblast growth factor 14
22809	activating transcription factor 5
22832	KIAA1009
22837	COBL-like 1
22846	vasohibin 1
22859	latrophilin 1
22862	fibronectin type III domain containing 3A
22874	pleckstrin homology domain containing, family A member 6
22883	calsyntenin 1
22976	PAX interacting (with transcription-activation domain) protein 1
22984	programmed cell death 11
22989	myosin, heavy chain 15
22998	LIM and calponin homology domains 1
23002	dishevelled associated activator of morphogenesis 1
23043	TRAF2 and NCK interacting kinase
23080	AVL9 homolog (S. cerevisiase)
23089	paternally expressed 10
23111	spastic paraplegia 20 (Troyer syndrome)
23133	PHD finger protein 8
23154	neurochondrin
23162	mitogen-activated protein kinase 8 interacting protein 3
23167	EFR3 homolog A (S. cerevisiae)
23208	synaptotagmin XI
23210	jumonji domain containing 6
23215	proline-rich coiled-coil 2C
23216	TBC1 (tre-2/USP6, BUB2, cdc16) domain family, member 1
23252	OTU domain containing 3
23261	calmodulin binding transcription activator 1
23262	diphosphoinositol pentakisphosphate kinase 2
23334	seizure threshold 2 homolog (mouse)
23363	obscurin-like 1
23423	transmembrane emp24 protein transport domain containing 3
23506	KIAA0240
23532	preferentially expressed antigen in melanoma
23576	dimethylarginine dimethylaminohydrolase 1
23648	single stranded DNA binding protein 3
23683	protein kinase D3
23710	GABA(A) receptor-associated protein like 1
23761	phosphatidylserine decarboxylase
23767	fibronectin leucine rich transmembrane protein 3
246721	polymerase (RNA) II (DNA directed) polypeptide J2
253832	zinc finger, DHHC-type containing 20
254251	ligand dependent nuclear receptor corepressor-like
2548	glucosidase, alpha; acid
255130	uncharacterized LOC255130
255928	synaptotagmin XIV
256281	nudix (nucleoside diphosphate linked moiety X)-type motif 14
257019	FERM domain containing 3
257194	neuronal growth regulator 1
2583	beta-1,4-N-acetyl-galactosaminyl transferase 1
25832	neuroblastoma breakpoint family, member 14
25875	LETM1 domain containing 1
25894	pleckstrin homology domain containing, family G (with RhoGef domain) member 4
259217	heat shock 70kDa protein 12A
259266	asp (abnormal spindle) homolog, microcephaly associated (Drosophila)
259307	interleukin 4 induced 1
25941	chromosome 18 open reading frame 10
25957	PNN-interacting serine/arginine-rich protein
2596	growth associated protein 43
26022	transmembrane protein 98
26036	zinc finger protein 451
26037	signal-induced proliferation-associated 1 like 1
26051	protein phosphatase 1, regulatory subunit 16B
26052	dynamin 3
26136	testis derived transcript (3 LIM domains)
2635	guanylate binding protein 3
26499	pleckstrin 2
26502	nuclear prelamin A recognition factor
26580	Berardinelli-Seip congenital lipodystrophy 2 (seipin)
26585	gremlin 1
26960	neurobeachin
27039	polycystic kidney disease 2-like 2
27077	B9 protein domain 1
27086	forkhead box P1
27145	filamin A interacting protein 1
27247	NFU1 iron-sulfur cluster scaffold homolog (S. cerevisiae)
27250	programmed cell death 4 (neoplastic transformation inhibitor)
27306	hematopoietic prostaglandin D synthase
2731	glycine dehydrogenase (decarboxylating)
27314	RAB30, member RAS oncogene family
2794	guanine nucleotide binding protein-like 1
2803	golgin A4
283120	H19, imprinted maternally expressed transcript (non-protein coding)
283431	growth arrest-specific 2 like 3
283659	protogenin
283970	pyridoxal-dependent decarboxylase domain containing 2, pseudogene
284001	coiled-coil domain containing 57
284408	uncharacterized LOC284408
285331	coiled-coil domain containing 66
285419	uncharacterized LOC285419
285550	family with sequence similarity 200, member B
286467	family with sequence similarity 195, member A pseudogene
287	ankyrin 2, neuronal
28951	tribbles homolog 2 (Drosophila)
28959	transmembrane protein 176B
290	alanyl (membrane) aminopeptidase
29058	chromosome 20 open reading frame 30
29092	long intergenic non-protein coding RNA 339
29906	ST8 alpha-N-acetyl-neuraminide alpha-2,8-sialyltransferase 5
30000	transportin 2
302	annexin A2
3094	histidine triad nucleotide binding protein 1
3241	hippocalcin-like 1
326625	methylmalonic aciduria (cobalamin deficiency) cblB type
3321	immunoglobulin superfamily, member 3
3382	islet cell autoantigen 1, 69kDa
338773	transmembrane protein 119
338811	family with sequence similarity 19 (chemokine (C-C motif)-like), member A2
339210	chromosome 17 open reading frame 67
339229	chromosome 17 open reading frame 90
339745	speckle-type POZ protein-like
3399	inhibitor of DNA binding 3, dominant negative helix-loop-helix protein
340371	nuclear receptor binding protein 2
340419	R-spondin 2
340527	NHS-like 2
3428	interferon, gamma-inducible protein 16
344558	SH3 domain containing ring finger 3
3490	insulin-like growth factor binding protein 7
3491	cysteine-rich, angiogenic inducer, 61
353088	zinc finger protein 429
353322	ankyrin repeat domain 37
3589	interleukin 11
3601	interleukin 15 receptor, alpha
3632	inositol polyphosphate-5-phosphatase, 40kDa
3655	integrin, alpha 6
3732	CD82 molecule
375035	SFT2 domain containing 2
375346	transmembrane protein 110
375484	chromosome 5 open reading frame 25
378	ADP-ribosylation factor 4
379025	uncharacterized LOC379025
387882	chromosome 12 open reading frame 75
388536	zinc finger protein 790
388796	uncharacterized LOC388796
389362	proteasome (prosome, macropain) assembly chaperone 4
3895	kinectin 1 (kinesin receptor)
389524	GTF2I repeat domain containing 2B
3976	leukemia inhibitory factor (cholinergic differentiation factor)
40	amiloride-sensitive cation channel 1, neuronal
400713	zinc finger protein 880
400818	neuroblastoma breakpoint family, member 9
400954	echinoderm microtubule associated protein like 6
400960	PCBP1 antisense RNA 1 (non-protein coding)
400961	poly(A) binding protein interacting protein 2B
4038	low density lipoprotein receptor-related protein 4
4046	lymphocyte-specific protein 1
404636	family with sequence similarity 45, member A
4052	latent transforming growth factor beta binding protein 1
4122	mannosidase, alpha, class 2A, member 2
4126	mannosidase, beta A, lysosomal
4140	MAP/microtubule affinity-regulating kinase 3
4188	MyoD family inhibitor
4194	Mdm4 p53 binding protein homolog (mouse)
421	armadillo repeat gene deleted in velocardiofacial syndrome
4232	mesoderm specific transcript homolog (mouse)
4285	mitochondrial intermediate peptidase
4288	antigen identified by monoclonal antibody Ki-67
4301	myeloid/lymphoid or mixed-lineage leukemia (trithorax homolog, Drosophila); translocated to, 4
4356	membrane protein, palmitoylated 3 (MAGUK p55 subfamily member 3)
439921	matrix-remodelling associated 7
440026	transmembrane protein 41B
440354	smg-1 homolog, phosphatidylinositol 3-kinase-related kinase (C. elegans) pseudogene
441024	methylenetetrahydrofolate dehydrogenase (NADP+ dependent) 2-like
441194	PMS2 C-terminal like pseudogene
441381	leucine rich repeat containing 24
445571	COBW domain containing 3
4552	5-methyltetrahydrofolate-homocysteine methyltransferase reductase
4616	growth arrest and DNA-damage-inducible, beta
4668	N-acetylgalactosaminidase, alpha-
4673	nucleosome assembly protein 1-like 1
4678	nuclear autoantigenic sperm protein (histone-binding)
475	ATX1 antioxidant protein 1 homolog (yeast)
4774	nuclear factor I/A
4881	natriuretic peptide receptor A/guanylate cyclase A (atrionatriuretic peptide receptor A)
4919	receptor tyrosine kinase-like orphan receptor 1
493	ATPase, Ca++ transporting, plasma membrane 4
494115	RNA binding motif protein, X-linked-like 1
5025	purinergic receptor P2X, ligand-gated ion channel, 4
5047	progestagen-associated endometrial protein
5066	peptidylglycine alpha-amidating monooxygenase
50809	heterochromatin protein 1, binding protein 3
50854	chromosome 6 open reading frame 48
5087	pre-B-cell leukemia homeobox 1
51004	coenzyme Q6 homolog, monooxygenase (S. cerevisiae)
51024	fission 1 (mitochondrial outer membrane) homolog (S. cerevisiae)
51050	peptidase inhibitor 15
51062	atlastin GTPase 1
51078	THAP domain containing 4
51084	crystallin, lambda 1
51092	SID1 transmembrane family, member 2
51111	suppressor of variegation 4-20 homolog 1 (Drosophila)
51175	tubulin, epsilon 1
51182	heat shock 70kDa protein 14
51200	carboxypeptidase A4
51290	ERGIC and golgi 2
51313	family with sequence similarity 198, member B
51330	tumor necrosis factor receptor superfamily, member 12A
51339	dapper, antagonist of beta-catenin, homolog 1 (Xenopus laevis)
51379	cytokine receptor-like factor 3
51430	chromosome 1 open reading frame 9
51454	GULP, engulfment adaptor PTB domain containing 1
51460	Scm-like with four mbt domains 1
51547	sirtuin 7
5157	platelet-derived growth factor receptor-like
51596	cutA divalent cation tolerance homolog (E. coli)
51747	LUC7-like 3 (S. cerevisiae)
5274	serpin peptidase inhibitor, clade I (neuroserpin), member 1
5292	pim-1 oncogene
5318	plakophilin 2
53353	low density lipoprotein receptor-related protein 1B
535	ATPase, H+ transporting, lysosomal V0 subunit a1
5359	phospholipid scramblase 1
5379	postmeiotic segregation increased 2 pseudogene 1
5382	postmeiotic segregation increased 2 pseudogene 4
5383	postmeiotic segregation increased 2 pseudogene 5
5387	postmeiotic segregation increased 2 pseudogene 3
53938	peptidylprolyl isomerase (cyclophilin)-like 3
5396	paired related homeobox 1
54103	pigeon homolog (Drosophila)
54149	chromosome 21 open reading frame 91
54345	SRY (sex determining region Y)-box 18
54434	slingshot homolog 1 (Drosophila)
54436	SH3 domain and tetratricopeptide repeats 1
5445	paraoxonase 2
54532	ubiquitin specific peptidase 53
54581	SCAN domain containing 2 pseudogene
54606	DEAD (Asp-Glu-Ala-Asp) box polypeptide 56
54749	ependymin related protein 1 (zebrafish)
54780	non-SMC element 4 homolog A (S. cerevisiae)
54801	HAUS augmin-like complex, subunit 6
548644	polymerase (RNA) II (DNA directed) polypeptide J3
54868	transmembrane protein 104
54939	COMM domain containing 4
54981	chromosome 9 open reading frame 95
55010	chromosome 12 open reading frame 48
55041	pleckstrin homology domain containing, family B (evectins) member 2
55073	leucine rich repeat containing 37, member A4 (pseudogene)
55082	arginine and glutamate rich 1
55105	G patch domain containing 2
55208	DCN1, defective in cullin neddylation 1, domain containing 2 (S. cerevisiae)
5521	protein phosphatase 2, regulatory subunit B, beta
55238	solute carrier family 38, member 7
5524	protein phosphatase 2A activator, regulatory subunit 4
55248	transmembrane protein 206
55325	UFM1-specific peptidase 2
55328	renalase, FAD-dependent amine oxidase
55334	solute carrier family 39 (zinc transporter), member 9
55365	transmembrane protein 176A
55384	maternally expressed 3 (non-protein coding)
55425	KIAA1704
55435	adaptor-related protein complex 1 associated regulatory protein
55573	CDV3 homolog (mouse)
55608	ankyrin repeat domain 10
55692	LUC7-like (S. cerevisiae)
55753	oxoglutarate dehydrogenase-like
55760	DEAH (Asp-Glu-Ala-His) box polypeptide 32
55768	N-glycanase 1
55771	proline rich 11
55773	TBC1 domain family, member 23
55853	IDI2 antisense RNA 1 (non-protein coding)
55855	family with sequence similarity 45, member A pseudogene
55914	erbb2 interacting protein
55915	LanC lantibiotic synthetase component C-like 2 (bacterial)
55959	sulfatase 2
5597	mitogen-activated protein kinase 6
5612	protein-kinase, interferon-inducible double stranded RNA dependent inhibitor, repressor of (P58 repressor)
56180	motile sperm domain containing 1
56256	SERTA domain containing 4
56260	chromosome 8 open reading frame 44
56265	carboxypeptidase X (M14 family), member 1
56647	BRCA2 and CDKN1A interacting protein
56674	TMEM9 domain family, member B
56898	3-hydroxybutyrate dehydrogenase, type 2
56928	signal peptide peptidase-like 2B
56944	olfactomedin-like 3
56952	phosphoribosyl transferase domain containing 1
56965	poly (ADP-ribose) polymerase family, member 6
56990	CDC42 small effector 2
56998	catenin, beta interacting protein 1
57157	putative homeodomain transcription factor 2
57211	G protein-coupled receptor 126
574036	chromosome 1 open reading frame 133
57412	arsenic (+3 oxidation state) methyltransferase
57414	rhomboid domain containing 2
57446	NDRG family member 3
57488	extended synaptotagmin-like protein 2
57509	microtubule associated tumor suppressor 1
57545	coiled-coil and C2 domain containing 2A
5757	prothymosin, alpha
57575	protocadherin 10
57602	ubiquitin specific peptidase 36
5764	pleiotrophin
57664	pleckstrin homology domain containing, family A (phosphoinositide binding specific) member 4
57670	KIAA1549
57679	amyotrophic lateral sclerosis 2 (juvenile)
5768	quiescin Q6 sulfhydryl oxidase 1
57680	chromodomain helicase DNA binding protein 8
57700	family with sequence similarity 160, member B1
57763	ankyrin repeat, family A (RFXANK-like), 2
57820	cyclin B1 interacting protein 1, E3 ubiquitin protein ligase
5784	protein tyrosine phosphatase, non-receptor type 14
58493	chromosome 9 open reading frame 80
5874	RAB27B, member RAS oncogene family
5935	RNA binding motif (RNP1, RRM) protein 3
6003	regulator of G-protein signaling 13
602	B-cell CLL/lymphoma 3
60370	arginine vasopressin-induced 1
605	B-cell CLL/lymphoma 7A
60674	growth arrest-specific 5 (non-protein coding)
6103	retinitis pigmentosa GTPase regulator
618	brain cytoplasmic RNA 1 (non-protein coding)
6284	S100 calcium binding protein A13
6322	sex comb on midleg-like 1 (Drosophila)
63874	abhydrolase domain containing 4
63898	SH2 domain containing 4A
63901	family with sequence similarity 111, member A
63908	N-ethylmaleimide-sensitive factor attachment protein, beta
63926	ankyrin repeat domain 5
63967	claspin
64151	non-SMC condensin I complex, subunit G
642236	FSHD region gene 1 pseudogene
64224	HERPUD family member 2
64283	190 kDa guanine nucleotide exchange factor
6434	transformer 2 beta homolog (Drosophila)
64423	inverted formin, FH2 and WH2 domain containing
6446	serum/glucocorticoid regulated kinase 1
64506	cytoplasmic polyadenylation element binding protein 1
6452	SH3-domain binding protein 2
64710	nuclear casein kinase and cyclin-dependent kinase substrate 1
64748	lipid phosphate phosphatase-related protein type 2
64754	SET and MYND domain containing 3
64763	zinc finger protein 574
64773	family with sequence similarity 113, member A
64784	CREB regulated transcription coactivator 3
64854	ubiquitin specific peptidase 46
64855	family with sequence similarity 129, member B
64901	RAN binding protein 17
64927	tetratricopeptide repeat domain 23
65062	transmembrane protein 237
652276	potassium channel tetramerisation domain containing 5 pseudogene
652968	GATS protein-like 3
6594	SWI/SNF related, matrix associated, actin dependent regulator of chromatin, subfamily a, member 1
66000	transmembrane protein 108
66008	trafficking protein, kinesin binding 2
6623	synuclein, gamma (breast cancer-specific protein 1)
6648	superoxide dismutase 2, mitochondrial
667	dystonin
6764	suppression of tumorigenicity 5
6769	SH3 and cysteine rich domain
684	bone marrow stromal cell antigen 2
6840	supervillin
6855	synaptophysin
6860	synaptotagmin IV
6920	transcription elongation factor A (SII), 3
7052	transglutaminase 2 (C polypeptide, protein-glutamine-gamma-glutamyltransferase)
7070	Thy-1 cell surface antigen
7078	TIMP metallopeptidase inhibitor 3
7112	thymopoietin
7150	topoisomerase (DNA) I
7153	topoisomerase (DNA) II alpha 170kDa
7162	trophoblast glycoprotein
721	complement component 4B (Chido blood group)
7257	translin-associated factor X
727956	succinate dehydrogenase complex, subunit A, flavoprotein pseudogene 2
7286	tuftelin 1
729513	SMG1 homolog, phosphatidylinositol 3-kinase-related kinase (C. elegans) pseudogene
729873	TBC1 domain family, member 3
735301	small nucleolar RNA host gene 9 (non-protein coding)
7403	lysine (K)-specific demethylase 6A
7425	VGF nerve growth factor inducible
7447	visinin-like 1
7456	WAS/WASL interacting protein family, member 1
7516	X-ray repair complementing defective repair in Chinese hamster cells 2
768206	progressive rod-cone degeneration
780	discoidin domain receptor tyrosine kinase 1
781	calcium channel, voltage-dependent, alpha 2/delta subunit 1
7832	BTG family, member 2
7837	peroxidasin homolog (Drosophila)
7857	secretogranin II
79078	chromosome 1 open reading frame 50
79085	solute carrier family 25 (mitochondrial carrier; phosphate carrier), member 23
79089	transmembrane and ubiquitin-like domain containing 2
79090	trafficking protein particle complex 6A
79091	methyltransferase like 22
79104	maternally expressed 8 (non-protein coding)
79133	chromosome 20 open reading frame 7
79154	dehydrogenase/reductase (SDR family) member 11
79572	ATPase type 13A3
79628	SH3 domain and tetratricopeptide repeats 2
79685	SAP30-like
79710	MORC family CW-type zinc finger 4
79716	aminopeptidase-like 1
79725	THAP domain containing 9
79739	tubulin tyrosine ligase-like family, member 7
79786	kelch-like 36 (Drosophila)
7980	tissue factor pathway inhibitor 2
79804	Nbla00301
7982	suppression of tumorigenicity 7
79875	thrombospondin, type I, domain containing 4
79903	N(alpha)-acetyltransferase 60, NatF catalytic subunit
79922	mitochondrial rRNA methyltransferase 1 homolog (S. cerevisiae)
79987	sushi, von Willebrand factor type A, EGF and pentraxin domain containing 1
80003	pecanex-like 2 (Drosophila)
80008	transmembrane protein 156
80067	DDB1 and CUL4 associated factor 17
80119	PIF1 5'-to-3' DNA helicase homolog (S. cerevisiae)
80144	Fraser syndrome 1
80194	transmembrane protein 134
80221	acyl-CoA synthetase family member 2
80255	solute carrier family 35, member F5
80256	KIAA1539
80271	inositol-trisphosphate 3-kinase C
8061	FOS-like antigen 1
80742	proline rich 3
80745	THUMP domain containing 2
80774	LIM domain containing 2
80781	collagen, type XVIII, alpha 1
80853	jumonji C domain containing histone demethylase 1 homolog D (S. cerevisiae)
80862	ZNRD1 antisense RNA 1 (non-protein coding)
8091	high mobility group AT-hook 2
8100	intraflagellar transport 88 homolog (Chlamydomonas)
8120	adaptor-related protein complex 3, beta 2 subunit
81572	p53 and DNA-damage regulated 1
81611	acidic (leucine-rich) nuclear phosphoprotein 32 family, member E
81624	diaphanous homolog 3 (Drosophila)
81788	NUAK family, SNF1-like kinase, 2
818	calcium/calmodulin-dependent protein kinase II gamma
81858	SHANK-associated RH domain interactor
81888	hydroxypyruvate isomerase (putative)
8295	transformation/transcription domain-associated protein
83461	cell division cycle associated 3
83607	AMME chromosomal region gene 1-like
83636	chromosome 19 open reading frame 12
83638	chromosome 11 open reading frame 68
83643	coiled-coil domain containing 3
83719	yippee-like 3 (Drosophila)
83787	armadillo repeat containing 10
83941	TM2 domain containing 1
84059	G protein-coupled receptor 98
8406	sushi-repeat containing protein, X-linked
84065	transmembrane protein 222
84083	zinc finger, RAN-binding domain containing 3
84129	acyl-CoA dehydrogenase family, member 11
84163	GTF2I repeat domain containing 2
84173	ELMO/CED-12 domain containing 3
84218	TBC1 domain family, member 3F
84288	EF-hand calcium binding domain 2
84305	within bgcn homolog (Drosophila)
84333	polycomb group ring finger 5
8434	reversion-inducing-cysteine-rich protein with kazal motifs
84446	BR serine/threonine kinase 1
84866	transmembrane protein 25
84895	family with sequence similarity 73, member B
84898	plexin domain containing 2
84899	transmembrane and tetratricopeptide repeat containing 4
84904	chromosome 9 open reading frame 100
84909	chromosome 9 open reading frame 3
8491	mitogen-activated protein kinase kinase kinase kinase 3
8492	protease, serine, 12 (neurotrypsin, motopsin)
84926	SPRY domain containing 3
84952	cingulin-like 1
84962	jub, ajuba homolog (Xenopus laevis)
84973	small nucleolar RNA host gene 7 (non-protein coding)
85013	transmembrane protein 128
85015	ubiquitin specific peptidase 45
8544	pirin (iron-binding nuclear protein)
85444	leucine rich repeat and coiled-coil domain containing 1
85464	slingshot homolog 2 (Drosophila)
8567	MAP-kinase activating death domain
8614	stanniocalcin 2
8642	dachsous 1 (Drosophila)
8725	chromosome 19 open reading frame 2
8761	poly(A) binding protein, cytoplasmic 4 (inducible form)
8777	multiple PDZ domain protein
8847	deleted in lymphocytic leukemia 2 (non-protein coding)
8853	ArfGAP with SH3 domain, ankyrin repeat and PH domain 2
8869	ST3 beta-galactoside alpha-2,3-sialyltransferase 5
89795	neuron navigator 3
89894	transmembrane protein 116
89958	chromosome 9 open reading frame 140
89970	ring finger and SPRY domain containing 1
89978	ATP binding domain 4
900	cyclin G1
90102	pleckstrin homology-like domain, family B, member 2
9044	BTAF1 RNA polymerase II, B-TFIID transcription factor-associated, 170kDa (Mot1 homolog, S. cerevisiae)
9047	SH2 domain containing 2A
90637	zinc finger, AN1-type domain 2A
90865	interleukin 33
9111	N-myc (and STAT) interactor
9118	internexin neuronal intermediate filament protein, alpha
9124	PDZ and LIM domain 1
9141	programmed cell death 5
91526	ankyrin repeat domain 44
9159	proprotein convertase subtilisin/kexin type 7
9172	myomesin (M-protein) 2, 165kDa
92482	BBSome interacting protein 1
9249	dehydrogenase/reductase (SDR family) member 3
92558	coiled-coil domain containing 64
93210	post-GPI attachment to proteins 3
93550	AN1, ubiquitin-like, homolog (Xenopus laevis)
93655	ST7 overlapping transcript 3 (non-protein coding)
93664	Ca++-dependent secretion activator 2
94101	ORM1-like 1 (S. cerevisiae)
9462	RAS protein activator like 2
9536	prostaglandin E synthase
9543	immunoglobulin superfamily, DCC subclass, member 3
9563	hexose-6-phosphate dehydrogenase (glucose 1-dehydrogenase)
9590	A kinase (PRKA) anchor protein 12
9645	microtubule associated monoxygenase, calponin and LIM domain containing 2
9665	KIAA0430
9677	diphosphoinositol pentakisphosphate kinase 1
9682	lysine (K)-specific demethylase 4A
9684	leucine rich repeat containing 14
9693	Rap guanine nucleotide exchange factor (GEF) 2
9747	family with sequence similarity 115, member A
9776	ATG13 autophagy related 13 homolog (S. cerevisiae)
9782	matrin 3
9792	SERTA domain containing 2
98	acylphosphatase 2, muscle type
9811	CBP80/20-dependent translation initiation factor
9842	pleckstrin homology domain containing, family M (with RUN domain) member 1
9860	leucine-rich repeats and immunoglobulin-like domains 2
9877	zinc finger CCCH-type containing 11A
9882	TBC1 domain family, member 4
9910	RAB GTPase activating protein 1-like
9928	kinesin family member 14
9946	crystallin, zeta (quinone reductase)-like 1
9991	ROD1 regulator of differentiation 1 (S. pombe)
[truncated: 26 more columns]

## Sheet: Biocarta AS
Gene Set Name	Description	p-value	FDR q-value
BIOCARTA_COMP_PATHWAY	Complement Pathway	1.02e-07	2.21e-05
BIOCARTA_CLASSIC_PATHWAY	Classical Complement Pathway	2.99e-07	3.24e-05
BIOCARTA_LECTIN_PATHWAY	Lectin Induced Complement Pathway	3.66e-06	0.000265
BIOCARTA_LAIR_PATHWAY	Cells and Molecules involved in local acute inflammatory response	2.61e-05	0.00141

## Sheet: KEGG AS
Gene Set Name	Description	p-value	FDR q-value
KEGG_COMPLEMENT_AND_COAGULATION_CASCADES	Complement and coagulation cascades	3.34e-07	6.21e-05
KEGG_MAPK_SIGNALING_PATHWAY	MAPK signaling pathway	6.73e-07	6.26e-05
KEGG_ECM_RECEPTOR_INTERACTION	ECM-receptor interaction	2.52e-06	0.000143
KEGG_LYSOSOME	Lysosome	3.07e-06	0.000143
KEGG_SPLICEOSOME	Spliceosome	5.75e-06	0.000214
KEGG_GLYCOSPHINGOLIPID_BIOSYNTHESIS_GANGLIO_SERIES	Glycosphingolipid biosynthesis - ganglio series	1.31e-05	0.000407
KEGG_HYPERTROPHIC_CARDIOMYOPATHY_HCM	Hypertrophic cardiomyopathy (HCM)	1.88e-05	0.0005
KEGG_RIBOSOME	Ribosome	2.56e-05	0.000595
KEGG_REGULATION_OF_ACTIN_CYTOSKELETON	Regulation of actin cytoskeleton	2.91e-05	0.000602
KEGG_DILATED_CARDIOMYOPATHY	Dilated cardiomyopathy	3.78e-05	0.000702
KEGG_PURINE_METABOLISM	Purine metabolism	5.84e-05	0.000988
KEGG_P53_SIGNALING_PATHWAY	p53 signaling pathway	0.000142	0.0022
KEGG_ARGININE_AND_PROLINE_METABOLISM	Arginine and proline metabolism	0.000182	0.00261
KEGG_HUNTINGTONS_DISEASE	Huntington's disease	0.000267	0.00347
KEGG_ARRHYTHMOGENIC_RIGHT_VENTRICULAR_CARDIOMYOPATHY_ARVC	Arrhythmogenic right ventricular cardiomyopathy (ARVC)	0.000279	0.00347
KEGG_PYRIMIDINE_METABOLISM	Pyrimidine metabolism	0.000333	0.00387
KEGG_CARDIAC_MUSCLE_CONTRACTION	Cardiac muscle contraction	0.000398	0.00435
KEGG_FOCAL_ADHESION	Focal adhesion	0.000589	0.00608
KEGG_ALANINE_ASPARTATE_AND_GLUTAMATE_METABOLISM	Alanine, aspartate and glutamate metabolism	0.000644	0.00631
KEGG_FRUCTOSE_AND_MANNOSE_METABOLISM	Fructose and mannose metabolism	0.000858	0.00798
KEGG_PATHWAYS_IN_CANCER	Pathways in cancer	0.00116	0.0103
KEGG_GLYCEROPHOSPHOLIPID_METABOLISM	Glycerophospholipid metabolism	0.0016	0.0135
KEGG_SPHINGOLIPID_METABOLISM	Sphingolipid metabolism	0.00182	0.0147
KEGG_AXON_GUIDANCE	Axon guidance	0.00237	0.0184
KEGG_PENTOSE_PHOSPHATE_PATHWAY	Pentose phosphate pathway	0.00279	0.02
KEGG_VASOPRESSIN_REGULATED_WATER_REABSORPTION	Vasopressin-regulated water reabsorption	0.00279	0.02
KEGG_CHEMOKINE_SIGNALING_PATHWAY	Chemokine signaling pathway	0.00358	0.0242
KEGG_RNA_POLYMERASE	RNA polymerase	0.00364	0.0242
KEGG_FC_GAMMA_R_MEDIATED_PHAGOCYTOSIS	Fc gamma R-mediated phagocytosis	0.00585	0.0375
KEGG_ADHERENS_JUNCTION	Adherens junction	0.00639	0.0396
KEGG_PHENYLALANINE_METABOLISM	Phenylalanine metabolism	0.00688	0.0407
KEGG_CYTOKINE_CYTOKINE_RECEPTOR_INTERACTION	Cytokine-cytokine receptor interaction	0.00699	0.0407
