# Supplementary material for: Metabolic reprogramming of cancer cells by JMJD6-mediated pre-mRNA splicing associated with therapeutic response to splicing inhibitor
Source: eLife. 2024 Mar 15;12:RP90993. doi: 10.7554/eLife.90993 (PMC10942784; doi:10.7554/eLife.90993)
Supplement: Figure 6—source data 1. [file elife-90993-fig6-data1.xlsx]

## Sheet: Summary & Table1
									St. Jude Children's Research Hospital
									Proteomics Facility
									http://home.stjude.org/proteomics-mass-spectrometry/Pages/default.aspx
Project name:						Identification of proteins interacting with JMJD6
Service:						Proteome profiling by spectral counting (SC)
PI:			Dr. Jun Yang
User:			Dr. Carolyn Jablonowski
Date submitted:							2019-01-08
Date reported:							2019-01-11
Facility staff (primary):										Pagala, Vishwajeeth
Facility staff (secondary):										Kavdia, Kanisha
Results (see other spreadsheets by clicking the tabs at the bottom left corner on this page)
	Table 1. Summary of the MS analysis
	Samples					Total Identified Proteins							Total Spectral Counts
	BE2CCntrl					164							2129
	BE2CIP					127							2060
	SKNASCntrl					136							1770
	SKNASIP					154							2933
	Note: the sequences of identified peptides are available upon request.
	Cntrl vs IP (BE2C)- Spectral count comparison of proteins identified from the Cntrl and IP samples
	Cntrl vs IP (SKNAS)- Spectral count comparison of proteins identified from the Cntrl and IP samples
	Figure 1. Stained SDS Gel image of submitted samples
Discussion
	1. Spectral count, a semi-quantitative index, is the total number of MS/MS spectra matched to an assigned protein.
	2. For the immunoprecipitation (IP) analysis, the bait protein needs to be among the top ten abundant proteins to improve the possibility of detecting its interacting proteins.

## Sheet: Cntrl vs IP (BE2C)
Attention: this table may include multiple pages.
Cntrl vs IP (BE2C)- Spectral count comparison of proteins identified from the Cntrl and IP samples
SC: the summed number of spectral counts (i.e. MS/MS scans) assigned to one identified protein; TP: total number of peptides identified for a protein; Group: Identified proteins that share one or more peptides are grouped together (e.g. 01). The group is represented by the protein with maximal spectra count (e.g. 01.1). If other proteins in the same group are assigned with at least one uniquely i…
Group	Reference	Description	SC BE2CCntrl	SC BE2CIP	TP BE2CCntrl	TP BE2CIP	Mass (KD)	Abundance	p-value
105353	sp|Q6NYC1|JMJD6_HUMAN	Bifunctional arginine demethylase and lysyl-hydroxylase JMJD6 OS=Homo sapiens GN=JMJD6 PE=1 SV=1	0.1	349	0	17	46	1599.04	7.37244e-107		3490		JMJD6
104666	sp|Q8WUA2|PPIL4_HUMAN	Peptidyl-prolyl cis-trans isomerase-like 4 OS=Homo sapiens GN=PPIL4 PE=1 SV=1	0.1	18	0	8	57	28.85	1.03991e-06		180		PPIL4
103575	sp|O95232|LC7L3_HUMAN	Luc7-like protein 3 OS=Homo sapiens GN=LUC7L3 PE=1 SV=2	0.1	12	0	5	51	35.97	7.76021e-05		120		LUC7L3
100725	sp|Q01105|SET_HUMAN	Protein SET OS=Homo sapiens GN=SET PE=1 SV=3	8	0.1	4	0	33	11.95	0.00144197		0.0125		SET
103327	sp|P49321|NASP_HUMAN	Nuclear autoantigenic sperm protein OS=Homo sapiens GN=NASP PE=1 SV=2	8	0.1	6	0	85	7.63	0.00144197		0.0125		NASP
105036	sp|P23458|JAK1_HUMAN	Tyrosine-protein kinase JAK1 OS=Homo sapiens GN=JAK1 PE=1 SV=2	8	0.1	3	0	133	34.91	0.00144197		0.0125
101032	sp|Q92598|HS105_HUMAN	Heat shock protein 105 kDa OS=Homo sapiens GN=HSPH1 PE=1 SV=1	7	0.1	4	0	97	7.23	0.00302626		0.0142857
103490	sp|Q15057|ACAP2_HUMAN	Arf-GAP with coiled-coil, ANK repeat and PH domain-containing protein 2 OS=Homo sapiens GN=ACAP2 PE=1 SV=3	7	0.1	5	0	88	3.98	0.00302626		0.0142857
100518	sp|Q9UHD8|SEPT9_HUMAN	Septin-9 OS=Homo sapiens GN=SEPT9 PE=1 SV=2	6	0.1	4	0	65	12.24	0.00639365		0.0166667
101031	sp|P34932|HSP74_HUMAN	Heat shock 70 kDa protein 4 OS=Homo sapiens GN=HSPA4 PE=1 SV=4	6	0.1	4	0	94	6.36	0.00639365		0.0166667
100601	sp|P31153|METK2_HUMAN	S-adenosylmethionine synthase isoform type-2 OS=Homo sapiens GN=MAT2A PE=1 SV=1	16	35	5	10	44	68.75	0.0070822		2.1875
108339	sp|Q9Y6Y0|NS1BP_HUMAN	Influenza virus NS1A-binding protein OS=Homo sapiens GN=IVNS1ABP PE=1 SV=3	15	4	7	2	72	29.99	0.00920418		0.266667
101663	sp|Q8WWY3|PRP31_HUMAN	U4/U6 small nuclear ribonucleoprotein Prp31 OS=Homo sapiens GN=PRPF31 PE=1 SV=2	22	42	9	11	55	111.87	0.011699		1.90909
100663	sp|O60825|F262_HUMAN	6-phosphofructo-2-kinase/fructose-2,6-bisphosphatase 2 OS=Homo sapiens GN=PFKFB2 PE=1 SV=2	0.1	5	0	4	58	2.57	0.013628		50
100262	sp|P40926|MDHM_HUMAN	Malate dehydrogenase, mitochondrial OS=Homo sapiens GN=MDH2 PE=1 SV=3	5	0.1	4	0	35	7.05	0.013628		0.02
100429	sp|Q16658|FSCN1_HUMAN	Fascin OS=Homo sapiens GN=FSCN1 PE=1 SV=3	5	0.1	4	0	54	14.68	0.013628		0.02
100472	sp|O60282|KIF5C_HUMAN	Kinesin heavy chain isoform 5C OS=Homo sapiens GN=KIF5C PE=1 SV=1	5	0.1	4	0	109	4.57	0.013628		0.02
100548	sp|P23246|SFPQ_HUMAN	Splicing factor, proline- and glutamine-rich OS=Homo sapiens GN=SFPQ PE=1 SV=2	5	0.1	4	0	76	7.23	0.013628		0.02
101048	sp|P11586|C1TC_HUMAN	C-1-tetrahydrofolate synthase, cytoplasmic OS=Homo sapiens GN=MTHFD1 PE=1 SV=3	5	0.1	4	0	101	2.46	0.013628		0.02
101795	sp|Q00839|HNRPU_HUMAN	Heterogeneous nuclear ribonucleoprotein U OS=Homo sapiens GN=HNRNPU PE=1 SV=6	5	0.1	3	0	91	6.08	0.013628		0.02
102550	sp|Q92499|DDX1_HUMAN	ATP-dependent RNA helicase DDX1 OS=Homo sapiens GN=DDX1 PE=1 SV=2	5	0.1	5	0	82	4.25	0.013628		0.02
100056	sp|P04406|G3P_HUMAN	Glyceraldehyde-3-phosphate dehydrogenase OS=Homo sapiens GN=GAPDH PE=1 SV=3	30	14	7	7	36	104.08	0.0146863		0.466667
100994	sp|P13010|XRCC5_HUMAN	X-ray repair cross-complementing protein 5 OS=Homo sapiens GN=XRCC5 PE=1 SV=3	12	3	7	3	83	11.49	0.016188		0.25
100036	sp|P04075|ALDOA_HUMAN	Fructose-bisphosphate aldolase A OS=Homo sapiens GN=ALDOA PE=1 SV=2	18	7	7	3	39	44.42	0.0252058		0.388889
101701	sp|Q9UHX1|PUF60_HUMAN	Poly(U)-binding-splicing factor PUF60 OS=Homo sapiens GN=PUF60 PE=1 SV=1	0.1	4	0	2	60	11.7	0.0294083		40
104322	sp|Q9Y657|SPIN1_HUMAN	Spindlin-1 OS=Homo sapiens GN=SPIN1 PE=1 SV=3	0.1	4	0	3	30	13.52	0.0294083		40
107406	sp|Q5T749|KPRP_HUMAN	Keratinocyte proline-rich protein OS=Homo sapiens GN=KPRP PE=1 SV=1	0.1	4	0	3	64	3.12	0.0294083		40
100009	sp|P09429|HMGB1_HUMAN	High mobility group protein B1 OS=Homo sapiens GN=HMGB1 PE=1 SV=3	4	0.1	4	0	25	8.04	0.0294083		0.025
100444	sp|P62826|RAN_HUMAN	GTP-binding nuclear protein Ran OS=Homo sapiens GN=RAN PE=1 SV=3	4	0.1	3	0	24	16.39	0.0294083		0.025
102939	sp|O43318|M3K7_HUMAN	Mitogen-activated protein kinase kinase kinase 7 OS=Homo sapiens GN=MAP3K7 PE=1 SV=1	4	0.1	4	0	67	2.98	0.0294083		0.025
104312	sp|O14917|PCD17_HUMAN	Protocadherin-17 OS=Homo sapiens GN=PCDH17 PE=2 SV=2	4	0.1	2	0	126	1.59	0.0294083		0.025
104972	sp|P26599|PTBP1_HUMAN	Polypyrimidine tract-binding protein 1 OS=Homo sapiens GN=PTBP1 PE=1 SV=1	4	0.1	3	0	57	3.5	0.0294083		0.025
101359	sp|P19338|NUCL_HUMAN	Nucleolin OS=Homo sapiens GN=NCL PE=1 SV=3	15	6	8	4	77	19.59	0.0459109		0.4
100048	sp|P23528|COF1_HUMAN	Cofilin-1 OS=Homo sapiens GN=CFL1 PE=1 SV=3	8	2	5	2	18	43.26	0.049601		0.25
100891	sp|P23588|IF4B_HUMAN	Eukaryotic translation initiation factor 4B OS=Homo sapiens GN=EIF4B PE=1 SV=2	120	92	19	21	69	288.66	0.0541217		0.766667
100467	sp|Q15019|SEPT2_HUMAN	Septin-2 OS=Homo sapiens GN=SEPT2 PE=1 SV=1	0.1	3	0	3	41	10.85	0.0646465		30
102071	sp|P31689|DNJA1_HUMAN	DnaJ homolog subfamily A member 1 OS=Homo sapiens GN=DNAJA1 PE=1 SV=2	0.1	3	0	2	45	8.92	0.0646465		30
102895	sp|Q9Y383|LC7L2_HUMAN	Putative RNA-binding protein Luc7-like 2 OS=Homo sapiens GN=LUC7L2 PE=1 SV=2	0.1	3	0	2	46	20.44	0.0646465		30
100214	sp|P00558|PGK1_HUMAN	Phosphoglycerate kinase 1 OS=Homo sapiens GN=PGK1 PE=1 SV=3	3	0.1	2	0	45	3.36	0.0646465		0.0333333
100218	sp|P60842|IF4A1_HUMAN	Eukaryotic initiation factor 4A-I OS=Homo sapiens GN=EIF4A1 PE=1 SV=1	3	0.1	3	0	46	5.42	0.0646465		0.0333333
100226	sp|P60174|TPIS_HUMAN	Triosephosphate isomerase OS=Homo sapiens GN=TPI1 PE=1 SV=3	3	0.1	2	0	31	4.87	0.0646465		0.0333333
100337	sp|Q8NC51|PAIRB_HUMAN	Plasminogen activator inhibitor 1 RNA-binding protein OS=Homo sapiens GN=SERBP1 PE=1 SV=2	3	0.1	2	0	45	5.56	0.0646465		0.0333333
100370	sp|P30101|PDIA3_HUMAN	Protein disulfide-isomerase A3 OS=Homo sapiens GN=PDIA3 PE=1 SV=4	3	0.1	3	0	57	2.64	0.0646465		0.0333333
100428	sp|P21281|VATB2_HUMAN	V-type proton ATPase subunit B, brain isoform OS=Homo sapiens GN=ATP6V1B2 PE=1 SV=3	3	0.1	2	0	56	2.66	0.0646465		0.0333333
100664	sp|P07237|PDIA1_HUMAN	Protein disulfide-isomerase OS=Homo sapiens GN=P4HB PE=1 SV=3	3	0.1	2	0	57	2.63	0.0646465		0.0333333
101810	sp|P42166|LAP2A_HUMAN	Lamina-associated polypeptide 2, isoform alpha OS=Homo sapiens GN=TMPO PE=1 SV=2	3	0.1	3	0	75	1.99	0.0646465		0.0333333
102289	sp|P30153|2AAA_HUMAN	Serine/threonine-protein phosphatase 2A 65 kDa regulatory subunit A alpha isoform OS=Homo sapiens GN=PPP2R1A PE=1 SV=4	3	0.1	3	0	65	2.3	0.0646465		0.0333333
102932	sp|Q14974|IMB1_HUMAN	Importin subunit beta-1 OS=Homo sapiens GN=KPNB1 PE=1 SV=2	3	0.1	2	0	97	3.09	0.0646465		0.0333333
108444	sp|P49736|MCM2_HUMAN	DNA replication licensing factor MCM2 OS=Homo sapiens GN=MCM2 PE=1 SV=4	3	0.1	3	0	102	1.47	0.0646465		0.0333333
109179	sp|P33992|MCM5_HUMAN	DNA replication licensing factor MCM5 OS=Homo sapiens GN=MCM5 PE=1 SV=5	3	0.1	2	0	82	1.82	0.0646465		0.0333333
113787	sp|Q7Z353|HDX_HUMAN	Highly divergent homeobox OS=Homo sapiens GN=HDX PE=1 SV=1	3	0.1	3	0	77	9.07	0.0646465		0.0333333
100003	sp|P29966|MARCS_HUMAN	Myristoylated alanine-rich C-kinase substrate OS=Homo sapiens GN=MARCKS PE=1 SV=4	9	3	6	3	32	23.78	0.0764178		0.333333
100701	sp|P13639|EF2_HUMAN	Elongation factor 2 OS=Homo sapiens GN=EEF2 PE=1 SV=4	28	17	12	10	95	46.18	0.0993262		0.607143
100465	sp|O14818|PSA7_HUMAN	Proteasome subunit alpha type-7 OS=Homo sapiens GN=PSMA7 PE=1 SV=1	10	4	4	4	28	25.12	0.103123		0.4
100877	sp|P21333|FLNA_HUMAN	Filamin-A OS=Homo sapiens GN=FLNA PE=1 SV=4	51	36	28	27	281	45.09	0.106919		0.705882
100073	sp|P11142|HSP7C_HUMAN	Heat shock cognate 71 kDa protein OS=Homo sapiens GN=HSPA8 PE=1 SV=1	45	31	18	12	71	98.09	0.107287		0.688889
100277	sp|P62081|RS7_HUMAN	40S ribosomal protein S7 OS=Homo sapiens GN=RPS7 PE=1 SV=1	0.1	2	0	1	22	4.52	0.146612		20
101488	sp|Q16630|CPSF6_HUMAN	Cleavage and polyadenylation specificity factor subunit 6 OS=Homo sapiens GN=CPSF6 PE=1 SV=2	0.1	2	0	1	59	4.22	0.146612		20
108577	sp|Q8IX18|DHX40_HUMAN	Probable ATP-dependent RNA helicase DHX40 OS=Homo sapiens GN=DHX40 PE=1 SV=2	0.1	2	0	1	89	2.82	0.146612		20
108586	sp|Q8IYT4|KATL2_HUMAN	Katanin p60 ATPase-containing subunit A-like 2 OS=Homo sapiens GN=KATNAL2 PE=2 SV=3	0.1	2	0	1	61	5.72	0.146612		20
100052	sp|P50395|GDIB_HUMAN	Rab GDP dissociation inhibitor beta OS=Homo sapiens GN=GDI2 PE=1 SV=2	2	0.1	1	0	51	1.98	0.146612		0.05
100087	sp|Q14240|IF4A2_HUMAN	Eukaryotic initiation factor 4A-II OS=Homo sapiens GN=EIF4A2 PE=1 SV=2	2	0.1	2	0	46	4.31	0.146612		0.05
100126	sp|P15311|EZRI_HUMAN	Ezrin OS=Homo sapiens GN=EZR PE=1 SV=4	2	0.1	1	0	69	2.88	0.146612		0.05
100347	sp|P35579|MYH9_HUMAN	Myosin-9 OS=Homo sapiens GN=MYH9 PE=1 SV=4	2	0.1	2	0	226	0.88	0.146612		0.05
100523	sp|P27797|CALR_HUMAN	Calreticulin OS=Homo sapiens GN=CALR PE=1 SV=1	2	0.1	2	0	48	9.35	0.146612		0.05
100525	sp|P38606|VATA_HUMAN	V-type proton ATPase catalytic subunit A OS=Homo sapiens GN=ATP6V1A PE=1 SV=2	2	0.1	2	0	68	1.46	0.146612		0.05
100591	sp|Q12906|ILF3_HUMAN	Interleukin enhancer-binding factor 3 OS=Homo sapiens GN=ILF3 PE=1 SV=3	2	0.1	1	0	95	1.05	0.146612		0.05
100781	sp|P27816|MAP4_HUMAN	Microtubule-associated protein 4 OS=Homo sapiens GN=MAP4 PE=1 SV=3	2	0.1	2	0	121	0.83	0.146612		0.05
101006	sp|P48735|IDHP_HUMAN	Isocitrate dehydrogenase [NADP], mitochondrial OS=Homo sapiens GN=IDH2 PE=1 SV=2	2	0.1	1	0	51	1.97	0.146612		0.05
101086	sp|P54105|ICLN_HUMAN	Methylosome subunit pICln OS=Homo sapiens GN=CLNS1A PE=1 SV=1	2	0.1	1	0	26	3.82	0.146612		0.05
101154	sp|P55884|EIF3B_HUMAN	Eukaryotic translation initiation factor 3 subunit B OS=Homo sapiens GN=EIF3B PE=1 SV=3	2	0.1	2	0	92	2.16	0.146612		0.05
101480	sp|P22314|UBA1_HUMAN	Ubiquitin-like modifier-activating enzyme 1 OS=Homo sapiens GN=UBA1 PE=1 SV=3	2	0.1	2	0	118	0.85	0.146612		0.05
101595	sp|Q7KZF4|SND1_HUMAN	Staphylococcal nuclease domain-containing protein 1 OS=Homo sapiens GN=SND1 PE=1 SV=1	2	0.1	2	0	102	0.98	0.146612		0.05
101731	sp|P26639|SYTC_HUMAN	Threonine--tRNA ligase, cytoplasmic OS=Homo sapiens GN=TARS PE=1 SV=3	2	0.1	1	0	83	1.2	0.146612		0.05
101771	sp|Q9Y4L1|HYOU1_HUMAN	Hypoxia up-regulated protein 1 OS=Homo sapiens GN=HYOU1 PE=1 SV=1	2	0.1	2	0	111	0.9	0.146612		0.05
102054	sp|O60271|JIP4_HUMAN	C-Jun-amino-terminal kinase-interacting protein 4 OS=Homo sapiens GN=SPAG9 PE=1 SV=4	2	0.1	2	0	146	0.68	0.146612		0.05
102197	sp|P46940|IQGA1_HUMAN	Ras GTPase-activating-like protein IQGAP1 OS=Homo sapiens GN=IQGAP1 PE=1 SV=1	2	0.1	2	0	189	1.85	0.146612		0.05
102347	sp|P06744|G6PI_HUMAN	Glucose-6-phosphate isomerase OS=Homo sapiens GN=GPI PE=1 SV=4	2	0.1	1	0	63	1.58	0.146612		0.05
102747	sp|Q9P2J5|SYLC_HUMAN	Leucine--tRNA ligase, cytoplasmic OS=Homo sapiens GN=LARS PE=1 SV=2	2	0.1	2	0	134	0.74	0.146612		0.05
115029	sp|P33993|MCM7_HUMAN	DNA replication licensing factor MCM7 OS=Homo sapiens GN=MCM7 PE=1 SV=4	2	0.1	2	0	81	1.23	0.146612		0.05
101431	sp|P12956|XRCC6_HUMAN	X-ray repair cross-complementing protein 6 OS=Homo sapiens GN=XRCC6 PE=1 SV=2	6	2	3	1	70	5.73	0.147976		0.333333
103903	sp|O00410|IPO5_HUMAN	Importin-5 OS=Homo sapiens GN=IPO5 PE=1 SV=4	6	2	5	1	124	4.05	0.147976		0.333333
102536	sp|Q9Y4E8|UBP15_HUMAN	Ubiquitin carboxyl-terminal hydrolase 15 OS=Homo sapiens GN=USP15 PE=1 SV=3	12	6	8	3	112	13.35	0.153332		0.5
100215	sp|P06733|ENOA_HUMAN	Alpha-enolase OS=Homo sapiens GN=ENO1 PE=1 SV=2	20	12	9	6	47	46.67	0.155099		0.6
102953	sp|P49902|5NTC_HUMAN	Cytosolic purine 5'-nucleotidase OS=Homo sapiens GN=NT5C2 PE=1 SV=1	9	4	6	4	65	15.4	0.160073		0.444444
102318	sp|P49327|FAS_HUMAN	Fatty acid synthase OS=Homo sapiens GN=FASN PE=1 SV=3	74	58	31	26	273	63.86	0.163216		0.783784
100532	sp|P29401|TKT_HUMAN	Transketolase OS=Homo sapiens GN=TKT PE=1 SV=3	13	7	7	4	68	23.59	0.176361		0.538462
100189	sp|P10809|CH60_HUMAN	60 kDa heat shock protein, mitochondrial OS=Homo sapiens GN=HSPD1 PE=1 SV=2	33	23	12	12	61	78.67	0.180278		0.69697
100353	sp|P38646|GRP75_HUMAN	Stress-70 protein, mitochondrial OS=Homo sapiens GN=HSPA9 PE=1 SV=2	34	24	14	13	74	44.82	0.188056		0.705882
101712	sp|P08865|RSSA_HUMAN	40S ribosomal protein SA OS=Homo sapiens GN=RPSA PE=1 SV=4	10	5	4	3	33	38.07	0.19242		0.5
100460	sp|P61978|HNRPK_HUMAN	Heterogeneous nuclear ribonucleoprotein K OS=Homo sapiens GN=HNRNPK PE=1 SV=1	14	8	6	6	51	40.24	0.197971		0.571429
101559	sp|Q58FF8|H90B2_HUMAN	Putative heat shock protein HSP 90-beta 2 OS=Homo sapiens GN=HSP90AB2P PE=1 SV=2	24	16	6	5	44	80.1	0.204374		0.666667
100092	sp|P08238|HS90B_HUMAN	Heat shock protein HSP 90-beta OS=Homo sapiens GN=HSP90AB1 PE=1 SV=4	80	65	23	22	83	176.05	0.212472		0.8125
100471	sp|P07195|LDHB_HUMAN	L-lactate dehydrogenase B chain OS=Homo sapiens GN=LDHB PE=1 SV=2	15	9	8	5	37	55.99	0.218221		0.6
102214	sp|P42704|LPPRC_HUMAN	Leucine-rich PPR motif-containing protein, mitochondrial OS=Homo sapiens GN=LRPPRC PE=1 SV=3	20	13	11	8	158	13.62	0.221259		0.65
109031	sp|Q9BUA3|CK084_HUMAN	Uncharacterized protein C11orf84 OS=Homo sapiens GN=C11orf84 PE=1 SV=3	2	5	1	1	41	25.6	0.24911		2.5
100868	sp|Q7Z4S6|KI21A_HUMAN	Kinesin-like protein KIF21A OS=Homo sapiens GN=KIF21A PE=1 SV=2	5	2	4	2	187	1.87	0.24911		0.4
101955	sp|Q15750|TAB1_HUMAN	TGF-beta-activated kinase 1 and MAP3K7-binding protein 1 OS=Homo sapiens GN=TAB1 PE=1 SV=1	5	2	4	1	55	10.07	0.24911		0.4
100113	sp|P07900|HS90A_HUMAN	Heat shock protein HSP 90-alpha OS=Homo sapiens GN=HSP90AA1 PE=1 SV=5	81	67	25	24	85	184.97	0.249463		0.82716
100001	sp|P80723|BASP1_HUMAN	Brain acid soluble protein 1 OS=Homo sapiens GN=BASP1 PE=1 SV=2	9	5	8	3	23	30.86	0.281686		0.555556
100110	sp|Q16181|SEPT7_HUMAN	Septin-7 OS=Homo sapiens GN=SEPT7 PE=1 SV=2	9	5	7	4	51	22.71	0.281686		0.555556
100096	sp|P63104|1433Z_HUMAN	14-3-3 protein zeta/delta OS=Homo sapiens GN=YWHAZ PE=1 SV=1	10	6	5	3	28	52.29	0.314739		0.6
101972	cu|O75688|PPM1B_HUMAN	NP_808908.1 Protein phosphatase 1B (EC 3.1.3.16) (Protein phosphatase 2C isoform beta) (PP2C-beta)	82	70	7	7	21	595.44	0.330138		0.853659
100608	sp|Q14194|DPYL1_HUMAN	Dihydropyrimidinase-related protein 1 OS=Homo sapiens GN=CRMP1 PE=1 SV=1	11	7	5	5	62	8.85	0.343761		0.636364
101000	sp|P33176|KINH_HUMAN	Kinesin-1 heavy chain OS=Homo sapiens GN=KIF5B PE=1 SV=1	11	7	9	6	110	13.23	0.343761		0.636364
104504	sp|Q14315|FLNC_HUMAN	Filamin-C OS=Homo sapiens GN=FLNC PE=1 SV=3	20	15	10	10	291	18.57	0.397217		0.75
100540	sp|P49368|TCPG_HUMAN	T-complex protein 1 subunit gamma OS=Homo sapiens GN=CCT3 PE=1 SV=4	8	5	6	3	60	10.74	0.403259		0.625
100272	sp|P09211|GSTP1_HUMAN	Glutathione S-transferase P OS=Homo sapiens GN=GSTP1 PE=1 SV=2	4	2	3	2	23	12.85	0.409726		0.5
116913	sp|Q9BRS2|RIOK1_HUMAN	Serine/threonine-protein kinase RIO1 OS=Homo sapiens GN=RIOK1 PE=1 SV=2	4	2	3	2	66	4.58	0.409726		0.5
100851	sp|P40227|TCPZ_HUMAN	T-complex protein 1 subunit zeta OS=Homo sapiens GN=CCT6A PE=1 SV=3	14	10	8	7	58	20.69	0.413126		0.714286
100542	sp|P14618|KPYM_HUMAN	Pyruvate kinase PKM OS=Homo sapiens GN=PKM PE=1 SV=4	104	116	23	25	58	308.28	0.418377		1.11538
100213	sp|P11021|GRP78_HUMAN	78 kDa glucose-regulated protein OS=Homo sapiens GN=HSPA5 PE=1 SV=2	11	15	6	9	72	37.35	0.431853		1.36364
100314	sp|P30041|PRDX6_HUMAN	Peroxiredoxin-6 OS=Homo sapiens GN=PRDX6 PE=1 SV=3	9	6	5	3	25	47.96	0.437031		0.666667
101022	sp|Q99873|ANM1_HUMAN	Protein arginine N-methyltransferase 1 OS=Homo sapiens GN=PRMT1 PE=1 SV=2	9	6	5	4	41	40.97	0.437031		0.666667
100675	sp|P68104|EF1A1_HUMAN	Elongation factor 1-alpha 1 OS=Homo sapiens GN=EEF1A1 PE=1 SV=1	33	27	9	8	50	133.71	0.438195		0.818182
102171	sp|Q3ZCM7|TBB8_HUMAN	Tubulin beta-8 chain OS=Homo sapiens GN=TUBB8 PE=1 SV=2	16	12	2	3	50	50.26	0.448916		0.75
100033	sp|Q13885|TBB2A_HUMAN	Tubulin beta-2A chain OS=Homo sapiens GN=TUBB2A PE=1 SV=1	61	53	10	10	50	197.49	0.45351		0.868852
101624	sp|Q9BUF5|TBB6_HUMAN	Tubulin beta-6 chain OS=Homo sapiens GN=TUBB6 PE=1 SV=1	17	13	3	4	50	51.18	0.464544		0.764706
100071	sp|P27348|1433T_HUMAN	14-3-3 protein theta OS=Homo sapiens GN=YWHAQ PE=1 SV=1	10	7	5	4	28	37.84	0.465686		0.7
100078	sp|Q06830|PRDX1_HUMAN	Peroxiredoxin-1 OS=Homo sapiens GN=PRDX1 PE=1 SV=1	5	3	2	3	22	36.2	0.477162		0.6
101609	cu|P78347|GTF2I_HUMAN	NP_001267729.1 General transcription factor II-I (GTFII-I) (TFII-I) (Bruton tyrosine kinase-associated protein 135) (BAP-135) (BTK-associated protein 135) (SRF-Phox1-interacting protein) (SPIN) (Williams-Beuren syndrome chromosomal region 6 protein)	5	3	2	1	30	16.45	0.477162		0.6
101807	sp|Q12931|TRAP1_HUMAN	Heat shock protein 75 kDa, mitochondrial OS=Homo sapiens GN=TRAP1 PE=1 SV=3	5	3	2	2	80	7.49	0.477162		0.6
104224	sp|P13929|ENOB_HUMAN	Beta-enolase OS=Homo sapiens GN=ENO3 PE=1 SV=5	5	3	2	2	47	10.65	0.477162		0.6
105329	sp|Q15208|STK38_HUMAN	Serine/threonine-protein kinase 38 OS=Homo sapiens GN=STK38 PE=1 SV=1	33	39	15	15	54	152.34	0.479245		1.18182
101500	sp|Q9Y490|TLN1_HUMAN	Talin-1 OS=Homo sapiens GN=TLN1 PE=1 SV=3	4	6	3	5	270	9.46	0.525693		1.5
101937	sp|Q9Y265|RUVB1_HUMAN	RuvB-like 1 OS=Homo sapiens GN=RUVBL1 PE=1 SV=1	4	6	3	4	50	16.93	0.525693		1.5
100430	sp|P35813|PPM1A_HUMAN	Protein phosphatase 1A OS=Homo sapiens GN=PPM1A PE=1 SV=1	18	22	6	9	42	76.61	0.526744		1.22222
100059	sp|P27824|CALX_HUMAN	Calnexin OS=Homo sapiens GN=CANX PE=1 SV=2	13	10	4	4	68	25.18	0.531029		0.769231
100283	sp|P06576|ATPB_HUMAN	ATP synthase subunit beta, mitochondrial OS=Homo sapiens GN=ATP5B PE=1 SV=3	14	11	5	6	57	38.92	0.548024		0.785714
103780	sp|Q9UHL4|DPP2_HUMAN	Dipeptidyl peptidase 2 OS=Homo sapiens GN=DPP7 PE=1 SV=3	5	7	4	6	54	14.73	0.562791		1.4
100061	sp|Q16555|DPYL2_HUMAN	Dihydropyrimidinase-related protein 2 OS=Homo sapiens GN=DPYSL2 PE=1 SV=1	16	13	10	10	62	23.29	0.577128		0.8125
100147	sp|P61981|1433G_HUMAN	14-3-3 protein gamma OS=Homo sapiens GN=YWHAG PE=1 SV=2	8	6	3	4	28	38.89	0.592347		0.75
100847	sp|O00571|DDX3X_HUMAN	ATP-dependent RNA helicase DDX3X OS=Homo sapiens GN=DDX3X PE=1 SV=3	8	6	3	3	73	11.61	0.592347		0.75
104758	sp|P06748|NPM_HUMAN	Nucleophosmin OS=Homo sapiens GN=NPM1 PE=1 SV=2	9	7	3	3	33	27.64	0.616614		0.777778
101692	sp|Q9Y2H1|ST38L_HUMAN	Serine/threonine-protein kinase 38-like OS=Homo sapiens GN=STK38L PE=1 SV=3	17	20	8	9	54	78.75	0.621682		1.17647
100124	sp|P25705|ATPA_HUMAN	ATP synthase subunit alpha, mitochondrial OS=Homo sapiens GN=ATP5A1 PE=1 SV=1	8	10	6	5	60	30.98	0.637004		1.25
101113	sp|P49411|EFTU_HUMAN	Elongation factor Tu, mitochondrial OS=Homo sapiens GN=TUFM PE=1 SV=2	8	10	3	5	50	36.36	0.637004		1.25
100976	sp|P78371|TCPB_HUMAN	T-complex protein 1 subunit beta OS=Homo sapiens GN=CCT2 PE=1 SV=4	10	8	5	6	57	18.28	0.637004		0.8
100674	sp|Q05639|EF1A2_HUMAN	Elongation factor 1-alpha 2 OS=Homo sapiens GN=EEF1A2 PE=1 SV=1	22	19	10	9	50	71.37	0.639262		0.863636
101730	sp|P53396|ACLY_HUMAN	ATP-citrate synthase OS=Homo sapiens GN=ACLY PE=1 SV=3	22	19	12	11	121	30.22	0.639262		0.863636
103740	sp|O14744|ANM5_HUMAN	Protein arginine N-methyltransferase 5 OS=Homo sapiens GN=PRMT5 PE=1 SV=4	91	85	20	21	73	212.01	0.651045		0.934066
100317	sp|Q15233|NONO_HUMAN	Non-POU domain-containing octamer-binding protein OS=Homo sapiens GN=NONO PE=1 SV=4	2	3	2	3	54	6.46	0.653629		1.5
101812	sp|O60502|OGA_HUMAN	Protein O-GlcNAcase OS=Homo sapiens GN=MGEA5 PE=1 SV=2	2	3	1	2	103	2.43	0.653629		1.5
100269	sp|P23526|SAHH_HUMAN	Adenosylhomocysteinase OS=Homo sapiens GN=AHCY PE=1 SV=4	3	2	2	1	48	7.34	0.653629		0.666667
100902	sp|P00338|LDHA_HUMAN	L-lactate dehydrogenase A chain OS=Homo sapiens GN=LDHA PE=1 SV=2	3	2	1	1	37	19.09	0.653629		0.666667
101164	sp|Q92734|TFG_HUMAN	Protein TFG OS=Homo sapiens GN=TFG PE=1 SV=2	3	2	2	1	43	16.12	0.653629		0.666667
103211	sp|Q9P2R3|ANFY1_HUMAN	Rabankyrin-5 OS=Homo sapiens GN=ANKFY1 PE=1 SV=2	3	2	1	1	128	5.07	0.653629		0.666667
100687	sp|P48643|TCPE_HUMAN	T-complex protein 1 subunit epsilon OS=Homo sapiens GN=CCT5 PE=1 SV=1	12	10	7	4	60	25.15	0.669601		0.833333
101382	sp|O43175|SERA_HUMAN	D-3-phosphoglycerate dehydrogenase OS=Homo sapiens GN=PHGDH PE=1 SV=4	12	10	8	7	57	19.43	0.669601		0.833333
103406	sp|Q6P3W7|SCYL2_HUMAN	SCY1-like protein 2 OS=Homo sapiens GN=SCYL2 PE=1 SV=1	28	31	13	15	104	64.64	0.696055		1.10714
100200	sp|Q04917|1433F_HUMAN	14-3-3 protein eta OS=Homo sapiens GN=YWHAH PE=1 SV=4	3	4	1	2	28	17.73	0.704976		1.33333
100312	sp|P31946|1433B_HUMAN	14-3-3 protein beta/alpha OS=Homo sapiens GN=YWHAB PE=1 SV=3	4	3	2	1	28	17.82	0.704976		0.75
101735	sp|P35637|FUS_HUMAN	RNA-binding protein FUS OS=Homo sapiens GN=FUS PE=1 SV=1	4	3	4	3	53	12.17	0.704976		0.75
104270	sp|P17066|HSP76_HUMAN	Heat shock 70 kDa protein 6 OS=Homo sapiens GN=HSPA6 PE=1 SV=2	4	3	2	1	71	10.57	0.704976		0.75
100778	sp|P25789|PSA4_HUMAN	Proteasome subunit alpha type-4 OS=Homo sapiens GN=PSMA4 PE=1 SV=1	14	16	6	6	29	72.96	0.7149		1.14286
100563	sp|P14625|ENPL_HUMAN	Endoplasmin OS=Homo sapiens GN=HSP90B1 PE=1 SV=1	38	35	17	16	92	88.19	0.725459		0.921053
100080	sp|Q13509|TBB3_HUMAN	Tubulin beta-3 chain OS=Homo sapiens GN=TUBB3 PE=1 SV=2	39	36	12	11	50	119.04	0.729		0.923077
100365	sp|O43707|ACTN4_HUMAN	Alpha-actinin-4 OS=Homo sapiens GN=ACTN4 PE=1 SV=2	5	4	3	2	105	9.54	0.738623		0.8
103348	sp|P98175|RBM10_HUMAN	RNA-binding protein 10 OS=Homo sapiens GN=RBM10 PE=1 SV=3	49	46	16	19	103	75.87	0.75822		0.938776
100041	cu|P07437|TBB5_HUMAN	NP_001280142.1 Tubulin beta chain (Tubulin beta-5 chain)	50	47	10	10	27	311.46	0.760649		0.94
101428	sp|Q93009|UBP7_HUMAN	Ubiquitin carboxyl-terminal hydrolase 7 OS=Homo sapiens GN=USP7 PE=1 SV=2	6	7	3	5	128	6.63	0.781406		1.16667
101842	sp|O75369|FLNB_HUMAN	Filamin-B OS=Homo sapiens GN=FLNB PE=1 SV=2	6	7	3	4	278	7.73	0.781406		1.16667
102667	sp|P41250|SYG_HUMAN	Glycine--tRNA ligase OS=Homo sapiens GN=GARS PE=1 SV=3	7	6	3	3	83	7.82	0.781406		0.857143
100027	sp|P62258|1433E_HUMAN	14-3-3 protein epsilon OS=Homo sapiens GN=YWHAE PE=1 SV=1	8	7	4	4	29	36.01	0.796179		0.875
101106	sp|P17987|TCPA_HUMAN	T-complex protein 1 subunit alpha OS=Homo sapiens GN=TCP1 PE=1 SV=1	8	7	5	6	60	14.09	0.796179		0.875
101103	sp|P26641|EF1G_HUMAN	Elongation factor 1-gamma OS=Homo sapiens GN=EEF1G PE=1 SV=3	9	10	6	5	50	48.91	0.818505		1.11111
100565	sp|P50990|TCPQ_HUMAN	T-complex protein 1 subunit theta OS=Homo sapiens GN=CCT8 PE=1 SV=4	10	9	8	7	60	18.46	0.818505		0.9
102083	sp|O14639|ABLM1_HUMAN	Actin-binding LIM protein 1 OS=Homo sapiens GN=ABLIM1 PE=1 SV=3	11	10	7	6	88	29.1	0.827227		0.909091
105181	sp|Q16875|F263_HUMAN	6-phosphofructo-2-kinase/fructose-2,6-bisphosphatase 3 OS=Homo sapiens GN=PFKFB3 PE=1 SV=1	12	13	9	9	60	39.45	0.84146		1.08333
102713	sp|Q9BQA1|MEP50_HUMAN	Methylosome protein 50 OS=Homo sapiens GN=WDR77 PE=1 SV=1	21	22	7	7	37	99.45	0.878788		1.04762
103223	sp|Q9Y5B9|SP16H_HUMAN	FACT complex subunit SPT16 OS=Homo sapiens GN=SUPT16H PE=1 SV=1	2	2	1	1	120	5.42	1		1
116649	sp|P35030|TRY3_HUMAN	Trypsin-3 OS=Homo sapiens GN=PRSS3 PE=1 SV=2	2	2	1	1	33	12.3	1		1
100060	sp|Q71U36|TBA1A_HUMAN	Tubulin alpha-1A chain OS=Homo sapiens GN=TUBA1A PE=1 SV=1	4	4	2	2	50	7.98	1		1
100152	sp|P35268|RL22_HUMAN	60S ribosomal protein L22 OS=Homo sapiens GN=RPL22 PE=1 SV=2	4	4	2	3	15	54.13	1		1
100543	sp|P12814|ACTN1_HUMAN	Alpha-actinin-1 OS=Homo sapiens GN=ACTN1 PE=1 SV=2	5	5	3	3	103	9.22	1		1
102110	sp|Q99832|TCPH_HUMAN	T-complex protein 1 subunit eta OS=Homo sapiens GN=CCT7 PE=1 SV=2	6	6	4	5	59	13.48	1		1
102431	sp|P34931|HS71L_HUMAN	Heat shock 70 kDa protein 1-like OS=Homo sapiens GN=HSPA1L PE=1 SV=2	6	6	2	2	70	17.06	1		1
101668	sp|P50991|TCPD_HUMAN	T-complex protein 1 subunit delta OS=Homo sapiens GN=CCT4 PE=1 SV=4	8	8	6	7	58	16.41	1		1
100463	sp|Q14195|DPYL3_HUMAN	Dihydropyrimidinase-related protein 3 OS=Homo sapiens GN=DPYSL3 PE=1 SV=1	11	11	5	8	62	33.1	1		1
102501	sp|Q15084|PDIA6_HUMAN	Protein disulfide-isomerase A6 OS=Homo sapiens GN=PDIA6 PE=1 SV=1	13	13	4	5	48	47.82	1		1
100282	sp|P46821|MAP1B_HUMAN	Microtubule-associated protein 1B OS=Homo sapiens GN=MAP1B PE=1 SV=2	15	15	10	11	270	6.29	1		1
103021	sp|P22234|PUR6_HUMAN	Multifunctional protein ADE2 OS=Homo sapiens GN=PAICS PE=1 SV=3	21	21	10	9	47	64.82	1		1
100305	sp|P55072|TERA_HUMAN	Transitional endoplasmic reticulum ATPase OS=Homo sapiens GN=VCP PE=1 SV=4	58	58	19	20	89	115.94	1		1
											#DIV/0!
											#DIV/0!
											#DIV/0!

## Sheet: Cntrl vs IP (SKNAS)
Attention: this table may include multiple pages.
Cntrl vs IP (SKNAS)- Spectral count comparison of proteins identified from the Cntrl and IP samples
SC: the summed number of spectral counts (i.e. MS/MS scans) assigned to one identified protein; TP: total number of peptides identified for a protein; Group: Identified proteins that share one or more peptides are grouped together (e.g. 01). The group is represented by the protein with maximal spectra count (e.g. 01.1). If other proteins in the same group are assigned with at least one uniquely i…
Group	Reference	Description	SC SKNASCntrl	SC SKNASIP	TP SKNASCntrl	TP SKNASIP	Mass (KD)	Abundance	p-value
105353	sp|Q6NYC1|JMJD6_HUMAN	Bifunctional arginine demethylase and lysyl-hydroxylase JMJD6 OS=Homo sapiens GN=JMJD6 PE=1 SV=1	0.1	1136	0	20	46	1599.04	0		11360
108037	sp|Q14562|DHX8_HUMAN	ATP-dependent RNA helicase DHX8 OS=Homo sapiens GN=DHX8 PE=1 SV=1	0.1	45	0	22	139	16.16	5.42535e-15		450
103575	sp|O95232|LC7L3_HUMAN	Luc7-like protein 3 OS=Homo sapiens GN=LUC7L3 PE=1 SV=2	0.1	25	0	9	51	35.97	7.15836e-09		250
104481	sp|P26368|U2AF2_HUMAN	Splicing factor U2AF 65 kDa subunit OS=Homo sapiens GN=U2AF2 PE=1 SV=4	0.1	24	0	8	53	22.44	1.45449e-08		240
102895	sp|Q9Y383|LC7L2_HUMAN	Putative RNA-binding protein Luc7-like 2 OS=Homo sapiens GN=LUC7L2 PE=1 SV=2	0.1	16	0	8	46	20.44	4.35092e-06		160
104666	sp|Q8WUA2|PPIL4_HUMAN	Peptidyl-prolyl cis-trans isomerase-like 4 OS=Homo sapiens GN=PPIL4 PE=1 SV=1	0.1	15	0	8	57	28.85	8.91784e-06		150
100985	sp|P62913|RL11_HUMAN	60S ribosomal protein L11 OS=Homo sapiens GN=RPL11 PE=1 SV=2	0.1	13	0	5	20	32.11	3.76529e-05		130
101701	sp|Q9UHX1|PUF60_HUMAN	Poly(U)-binding-splicing factor PUF60 OS=Homo sapiens GN=PUF60 PE=1 SV=1	0.1	10	0	9	60	11.7	0.000332193		100
100152	sp|P35268|RL22_HUMAN	60S ribosomal protein L22 OS=Homo sapiens GN=RPL22 PE=1 SV=2	0.1	8	0	3	15	54.13	0.00144197		80
100970	sp|P08708|RS17_HUMAN	40S ribosomal protein S17 OS=Homo sapiens GN=RPS17 PE=1 SV=2	0.1	7	0	2	16	22.52	0.00302626		70
101686	sp|P27635|RL10_HUMAN	60S ribosomal protein L10 OS=Homo sapiens GN=RPL10 PE=1 SV=4	0.1	7	0	4	25	14.23	0.00302626		70
100048	sp|P23528|COF1_HUMAN	Cofilin-1 OS=Homo sapiens GN=CFL1 PE=1 SV=3	0.1	6	0	3	18	43.26	0.00639365		60
100548	sp|P23246|SFPQ_HUMAN	Splicing factor, proline- and glutamine-rich OS=Homo sapiens GN=SFPQ PE=1 SV=2	0.1	6	0	5	76	7.23	0.00639365		60
102297	sp|Q14498|RBM39_HUMAN	RNA-binding protein 39 OS=Homo sapiens GN=RBM39 PE=1 SV=2	0.1	6	0	4	59	5.06	0.00639365		60
100027	sp|P62258|1433E_HUMAN	14-3-3 protein epsilon OS=Homo sapiens GN=YWHAE PE=1 SV=1	6	0.1	3	0	29	36.01	0.00639365		0.0166667
101657	sp|O60841|IF2P_HUMAN	Eukaryotic translation initiation factor 5B OS=Homo sapiens GN=EIF5B PE=1 SV=4	0.1	5	0	5	139	1.8	0.013628		50
102527	sp|Q00341|VIGLN_HUMAN	Vigilin OS=Homo sapiens GN=HDLBP PE=1 SV=2	0.1	5	0	4	141	1.77	0.013628		50
101241	sp|P31943|HNRH1_HUMAN	Heterogeneous nuclear ribonucleoprotein H OS=Homo sapiens GN=HNRNPH1 PE=1 SV=4	5	0.1	4	0	49	5.08	0.013628		0.02
102197	sp|P46940|IQGA1_HUMAN	Ras GTPase-activating-like protein IQGAP1 OS=Homo sapiens GN=IQGAP1 PE=1 SV=1	5	0.1	3	0	189	1.85	0.013628		0.02
103740	sp|O14744|ANM5_HUMAN	Protein arginine N-methyltransferase 5 OS=Homo sapiens GN=PRMT5 PE=1 SV=4	80	52	20	16	73	212.01	0.01443		0.65
101000	sp|P33176|KINH_HUMAN	Kinesin-1 heavy chain OS=Homo sapiens GN=KIF5B PE=1 SV=1	9	2	7	2	110	13.23	0.0281612		0.222222
113787	sp|Q7Z353|HDX_HUMAN	Highly divergent homeobox OS=Homo sapiens GN=HDX PE=1 SV=1	9	2	6	2	77	9.07	0.0281612		0.222222
100877	sp|P21333|FLNA_HUMAN	Filamin-A OS=Homo sapiens GN=FLNA PE=1 SV=4	97	69	45	38	281	45.09	0.0293742		0.71134
100994	sp|P13010|XRCC5_HUMAN	X-ray repair cross-complementing protein 5 OS=Homo sapiens GN=XRCC5 PE=1 SV=3	0.1	4	0	4	83	11.49	0.0294083		40
101428	sp|Q93009|UBP7_HUMAN	Ubiquitin carboxyl-terminal hydrolase 7 OS=Homo sapiens GN=USP7 PE=1 SV=2	0.1	4	0	4	128	6.63	0.0294083		40
102123	sp|Q7L014|DDX46_HUMAN	Probable ATP-dependent RNA helicase DDX46 OS=Homo sapiens GN=DDX46 PE=1 SV=2	0.1	4	0	4	117	1.71	0.0294083		40
104239	sp|Q9NQ29|LUC7L_HUMAN	Putative RNA-binding protein Luc7-like 1 OS=Homo sapiens GN=LUC7L PE=1 SV=1	0.1	4	0	4	44	4.58	0.0294083		40
100071	sp|P27348|1433T_HUMAN	14-3-3 protein theta OS=Homo sapiens GN=YWHAQ PE=1 SV=1	4	0.1	2	0	28	37.84	0.0294083		0.025
100282	sp|P46821|MAP1B_HUMAN	Microtubule-associated protein 1B OS=Homo sapiens GN=MAP1B PE=1 SV=2	4	0.1	4	0	270	6.29	0.0294083		0.025
100444	sp|P62826|RAN_HUMAN	GTP-binding nuclear protein Ran OS=Homo sapiens GN=RAN PE=1 SV=3	4	0.1	3	0	24	16.39	0.0294083		0.025
101955	sp|Q15750|TAB1_HUMAN	TGF-beta-activated kinase 1 and MAP3K7-binding protein 1 OS=Homo sapiens GN=TAB1 PE=1 SV=1	4	0.1	3	0	55	10.07	0.0294083		0.025
104322	sp|Q9Y657|SPIN1_HUMAN	Spindlin-1 OS=Homo sapiens GN=SPIN1 PE=1 SV=3	4	0.1	2	0	30	13.52	0.0294083		0.025
101663	sp|Q8WWY3|PRP31_HUMAN	U4/U6 small nuclear ribonucleoprotein Prp31 OS=Homo sapiens GN=PRPF31 PE=1 SV=2	22	38	8	13	55	111.87	0.037695		1.72727
101653	sp|Q9Y2W1|TR150_HUMAN	Thyroid hormone receptor-associated protein 3 OS=Homo sapiens GN=THRAP3 PE=1 SV=2	9	19	7	9	109	12.89	0.0560183		2.11111
100116	sp|P02545|LMNA_HUMAN	Prelamin-A/C OS=Homo sapiens GN=LMNA PE=1 SV=1	0.1	3	0	2	74	2.02	0.0646465		30
100706	sp|P62979|RS27A_HUMAN	Ubiquitin-40S ribosomal protein S27a OS=Homo sapiens GN=RPS27A PE=1 SV=2	0.1	3	0	3	18	8.35	0.0646465		30
100847	sp|O00571|DDX3X_HUMAN	ATP-dependent RNA helicase DDX3X OS=Homo sapiens GN=DDX3X PE=1 SV=3	0.1	3	0	3	73	11.61	0.0646465		30
101488	sp|Q16630|CPSF6_HUMAN	Cleavage and polyadenylation specificity factor subunit 6 OS=Homo sapiens GN=CPSF6 PE=1 SV=2	0.1	3	0	3	59	4.22	0.0646465		30
102932	sp|Q14974|IMB1_HUMAN	Importin subunit beta-1 OS=Homo sapiens GN=KPNB1 PE=1 SV=2	0.1	3	0	3	97	3.09	0.0646465		30
104956	sp|Q9P270|SLAI2_HUMAN	SLAIN motif-containing protein 2 OS=Homo sapiens GN=SLAIN2 PE=1 SV=2	0.1	3	0	2	63	2.4	0.0646465		30
108577	sp|Q8IX18|DHX40_HUMAN	Probable ATP-dependent RNA helicase DHX40 OS=Homo sapiens GN=DHX40 PE=1 SV=2	0.1	3	0	1	89	2.82	0.0646465		30
100003	sp|P29966|MARCS_HUMAN	Myristoylated alanine-rich C-kinase substrate OS=Homo sapiens GN=MARCKS PE=1 SV=4	3	0.1	3	0	32	23.78	0.0646465		0.0333333
100200	sp|Q04917|1433F_HUMAN	14-3-3 protein eta OS=Homo sapiens GN=YWHAH PE=1 SV=4	3	0.1	1	0	28	17.73	0.0646465		0.0333333
100259	sp|Q8N8S7|ENAH_HUMAN	Protein enabled homolog OS=Homo sapiens GN=ENAH PE=1 SV=2	3	0.1	2	0	66	2.26	0.0646465		0.0333333
100312	sp|P31946|1433B_HUMAN	14-3-3 protein beta/alpha OS=Homo sapiens GN=YWHAB PE=1 SV=3	3	0.1	1	0	28	17.82	0.0646465		0.0333333
100472	sp|O60282|KIF5C_HUMAN	Kinesin heavy chain isoform 5C OS=Homo sapiens GN=KIF5C PE=1 SV=1	3	0.1	2	0	109	4.57	0.0646465		0.0333333
100565	sp|P50990|TCPQ_HUMAN	T-complex protein 1 subunit theta OS=Homo sapiens GN=CCT8 PE=1 SV=4	3	0.1	3	0	60	18.46	0.0646465		0.0333333
100976	sp|P78371|TCPB_HUMAN	T-complex protein 1 subunit beta OS=Homo sapiens GN=CCT2 PE=1 SV=4	3	0.1	2	0	57	18.28	0.0646465		0.0333333
101668	sp|P50991|TCPD_HUMAN	T-complex protein 1 subunit delta OS=Homo sapiens GN=CCT4 PE=1 SV=4	3	0.1	2	0	58	16.41	0.0646465		0.0333333
101895	sp|O75821|EIF3G_HUMAN	Eukaryotic translation initiation factor 3 subunit G OS=Homo sapiens GN=EIF3G PE=1 SV=2	3	0.1	3	0	36	4.21	0.0646465		0.0333333
100891	sp|P23588|IF4B_HUMAN	Eukaryotic translation initiation factor 4B OS=Homo sapiens GN=EIF4B PE=1 SV=2	106	81	17	10	69	288.66	0.0671122		0.764151
105329	sp|Q15208|STK38_HUMAN	Serine/threonine-protein kinase 38 OS=Homo sapiens GN=STK38 PE=1 SV=1	55	38	16	16	54	152.34	0.0770966		0.690909
101359	sp|P19338|NUCL_HUMAN	Nucleolin OS=Homo sapiens GN=NCL PE=1 SV=3	2	7	2	4	77	19.59	0.0863071		3.5
100113	sp|P07900|HS90A_HUMAN	Heat shock protein HSP 90-alpha OS=Homo sapiens GN=HSP90AA1 PE=1 SV=5	72	93	21	23	85	184.97	0.101616		1.29167
101559	sp|Q58FF8|H90B2_HUMAN	Putative heat shock protein HSP 90-beta 2 OS=Homo sapiens GN=HSP90AB2P PE=1 SV=2	11	20	5	6	44	80.1	0.103491		1.81818
100283	sp|P06576|ATPB_HUMAN	ATP synthase subunit beta, mitochondrial OS=Homo sapiens GN=ATP5B PE=1 SV=3	13	6	7	4	57	38.92	0.104157		0.461538
101972	cu|O75688|PPM1B_HUMAN	NP_808908.1 Protein phosphatase 1B (EC 3.1.3.16) (Protein phosphatase 2C isoform beta) (PP2C-beta)	55	40	6	6	21	595.44	0.123027		0.727273
100059	sp|P27824|CALX_HUMAN	Calnexin OS=Homo sapiens GN=CANX PE=1 SV=2	8	3	4	2	68	25.18	0.124619		0.375
100563	sp|P14625|ENPL_HUMAN	Endoplasmin OS=Homo sapiens GN=HSP90B1 PE=1 SV=1	38	52	24	23	92	88.19	0.139212		1.36842
100087	sp|Q14240|IF4A2_HUMAN	Eukaryotic initiation factor 4A-II OS=Homo sapiens GN=EIF4A2 PE=1 SV=2	0.1	2	0	2	46	4.31	0.146612		20
100218	sp|P60842|IF4A1_HUMAN	Eukaryotic initiation factor 4A-I OS=Homo sapiens GN=EIF4A1 PE=1 SV=1	0.1	2	0	2	46	5.42	0.146612		20
100236	sp|P23284|PPIB_HUMAN	Peptidyl-prolyl cis-trans isomerase B OS=Homo sapiens GN=PPIB PE=1 SV=2	0.1	2	0	2	24	4.21	0.146612		20
100317	sp|Q15233|NONO_HUMAN	Non-POU domain-containing octamer-binding protein OS=Homo sapiens GN=NONO PE=1 SV=4	0.1	2	0	1	54	6.46	0.146612		20
100347	sp|P35579|MYH9_HUMAN	Myosin-9 OS=Homo sapiens GN=MYH9 PE=1 SV=4	0.1	2	0	2	226	0.88	0.146612		20
100441	sp|P15531|NDKA_HUMAN	Nucleoside diphosphate kinase A OS=Homo sapiens GN=NME1 PE=1 SV=1	0.1	2	0	2	17	5.83	0.146612		20
100578	sp|O43242|PSMD3_HUMAN	26S proteasome non-ATPase regulatory subunit 3 OS=Homo sapiens GN=PSMD3 PE=1 SV=2	0.1	2	0	2	61	1.64	0.146612		20
100843	sp|P67809|YBOX1_HUMAN	Nuclease-sensitive element-binding protein 1 OS=Homo sapiens GN=YBX1 PE=1 SV=3	0.1	2	0	1	36	2.79	0.146612		20
101154	sp|P55884|EIF3B_HUMAN	Eukaryotic translation initiation factor 3 subunit B OS=Homo sapiens GN=EIF3B PE=1 SV=3	0.1	2	0	2	92	2.16	0.146612		20
101609	cu|P78347|GTF2I_HUMAN	NP_001267729.1 General transcription factor II-I (GTFII-I) (TFII-I) (Bruton tyrosine kinase-associated protein 135) (BAP-135) (BTK-associated protein 135) (SRF-Phox1-interacting protein) (SPIN) (Williams-Beuren syndrome chromosomal region 6 protein)	0.1	2	0	2	30	16.45	0.146612		20
102153	sp|Q9NS86|LANC2_HUMAN	LanC-like protein 2 OS=Homo sapiens GN=LANCL2 PE=1 SV=1	0.1	2	0	2	51	1.97	0.146612		20
102245	sp|Q14103|HNRPD_HUMAN	Heterogeneous nuclear ribonucleoprotein D0 OS=Homo sapiens GN=HNRNPD PE=1 SV=1	0.1	2	0	1	38	2.6	0.146612		20
102399	sp|Q9C0C9|UBE2O_HUMAN	E2/E3 hybrid ubiquitin-protein ligase UBE2O OS=Homo sapiens GN=UBE2O PE=1 SV=3	0.1	2	0	1	141	0.71	0.146612		20
102456	sp|Q8NE71|ABCF1_HUMAN	ATP-binding cassette sub-family F member 1 OS=Homo sapiens GN=ABCF1 PE=1 SV=2	0.1	2	0	2	96	1.04	0.146612		20
102550	sp|Q92499|DDX1_HUMAN	ATP-dependent RNA helicase DDX1 OS=Homo sapiens GN=DDX1 PE=1 SV=2	0.1	2	0	2	82	4.25	0.146612		20
102650	sp|Q08945|SSRP1_HUMAN	FACT complex subunit SSRP1 OS=Homo sapiens GN=SSRP1 PE=1 SV=1	0.1	2	0	2	81	1.23	0.146612		20
104758	sp|P06748|NPM_HUMAN	Nucleophosmin OS=Homo sapiens GN=NPM1 PE=1 SV=2	0.1	2	0	2	33	27.64	0.146612		20
104922	sp|Q14331|FRG1_HUMAN	Protein FRG1 OS=Homo sapiens GN=FRG1 PE=1 SV=1	0.1	2	0	1	29	3.43	0.146612		20
107151	sp|Q12872|SFSWA_HUMAN	Splicing factor, suppressor of white-apricot homolog OS=Homo sapiens GN=SFSWAP PE=1 SV=3	0.1	2	0	2	105	0.95	0.146612		20
108173	sp|Q9P1Y6|PHRF1_HUMAN	PHD and RING finger domain-containing protein 1 OS=Homo sapiens GN=PHRF1 PE=1 SV=3	0.1	2	0	2	179	0.56	0.146612		20
100112	sp|P26038|MOES_HUMAN	Moesin OS=Homo sapiens GN=MSN PE=1 SV=3	2	0.1	2	0	68	1.48	0.146612		0.05
100126	sp|P15311|EZRI_HUMAN	Ezrin OS=Homo sapiens GN=EZR PE=1 SV=4	2	0.1	2	0	69	2.88	0.146612		0.05
100269	sp|P23526|SAHH_HUMAN	Adenosylhomocysteinase OS=Homo sapiens GN=AHCY PE=1 SV=4	2	0.1	1	0	48	7.34	0.146612		0.05
100337	sp|Q8NC51|PAIRB_HUMAN	Plasminogen activator inhibitor 1 RNA-binding protein OS=Homo sapiens GN=SERBP1 PE=1 SV=2	2	0.1	2	0	45	5.56	0.146612		0.05
100384	sp|Q16543|CDC37_HUMAN	Hsp90 co-chaperone Cdc37 OS=Homo sapiens GN=CDC37 PE=1 SV=1	2	0.1	1	0	44	2.25	0.146612		0.05
100681	sp|Q06323|PSME1_HUMAN	Proteasome activator complex subunit 1 OS=Homo sapiens GN=PSME1 PE=1 SV=1	2	0.1	1	0	29	3.48	0.146612		0.05
100853	sp|P43490|NAMPT_HUMAN	Nicotinamide phosphoribosyltransferase OS=Homo sapiens GN=NAMPT PE=1 SV=1	2	0.1	1	0	55	1.8	0.146612		0.05
101106	sp|P17987|TCPA_HUMAN	T-complex protein 1 subunit alpha OS=Homo sapiens GN=TCP1 PE=1 SV=1	2	0.1	2	0	60	14.09	0.146612		0.05
101493	sp|Q9UDY2|ZO2_HUMAN	Tight junction protein ZO-2 OS=Homo sapiens GN=TJP2 PE=1 SV=2	2	0.1	2	0	134	0.75	0.146612		0.05
101606	cu|P29692|EF1D_HUMAN	NP_115754.3 Elongation factor 1-delta (EF-1-delta) (Antigen NY-CO-4)	2	0.1	1	0	71	1.4	0.146612		0.05
103903	sp|O00410|IPO5_HUMAN	Importin-5 OS=Homo sapiens GN=IPO5 PE=1 SV=4	2	0.1	1	0	124	4.05	0.146612		0.05
104224	sp|P13929|ENOB_HUMAN	Beta-enolase OS=Homo sapiens GN=ENO3 PE=1 SV=5	2	0.1	1	0	47	10.65	0.146612		0.05
100147	sp|P61981|1433G_HUMAN	14-3-3 protein gamma OS=Homo sapiens GN=YWHAG PE=1 SV=2	6	2	3	2	28	38.89	0.147976		0.333333
104830	sp|P50454|SERPH_HUMAN	Serpin H1 OS=Homo sapiens GN=SERPINH1 PE=1 SV=2	6	2	4	1	46	8.62	0.147976		0.333333
100860	sp|Q13263|TIF1B_HUMAN	Transcription intermediary factor 1-beta OS=Homo sapiens GN=TRIM28 PE=1 SV=5	4	9	4	6	88	7.35	0.160073		2.25
100460	sp|P61978|HNRPK_HUMAN	Heterogeneous nuclear ribonucleoprotein K OS=Homo sapiens GN=HNRNPK PE=1 SV=1	12	7	7	5	51	40.24	0.248554		0.583333
102953	sp|P49902|5NTC_HUMAN	Cytosolic purine 5'-nucleotidase OS=Homo sapiens GN=NT5C2 PE=1 SV=1	5	2	3	1	65	15.4	0.24911		0.4
102083	sp|O14639|ABLM1_HUMAN	Actin-binding LIM protein 1 OS=Homo sapiens GN=ABLIM1 PE=1 SV=3	18	12	12	8	88	29.1	0.271703		0.666667
102713	sp|Q9BQA1|MEP50_HUMAN	Methylosome protein 50 OS=Homo sapiens GN=WDR77 PE=1 SV=1	18	12	7	5	37	99.45	0.271703		0.666667
109031	sp|Q9BUA3|CK084_HUMAN	Uncharacterized protein C11orf84 OS=Homo sapiens GN=C11orf84 PE=1 SV=3	9	5	4	2	41	25.6	0.281686		0.555556
102140	sp|P00966|ASSY_HUMAN	Argininosuccinate synthase OS=Homo sapiens GN=ASS1 PE=1 SV=2	20	14	5	7	47	36.56	0.302216		0.7
103348	sp|P98175|RBM10_HUMAN	RNA-binding protein 10 OS=Homo sapiens GN=RBM10 PE=1 SV=3	35	27	15	12	103	75.87	0.308954		0.771429
100902	sp|P00338|LDHA_HUMAN	L-lactate dehydrogenase A chain OS=Homo sapiens GN=LDHA PE=1 SV=2	3	6	2	4	37	19.09	0.312663		2
105963	sp|Q9NXV2|KCTD5_HUMAN	BTB/POZ domain-containing protein KCTD5 OS=Homo sapiens GN=KCTD5 PE=1 SV=1	6	3	4	3	26	17.26	0.312663		0.5
101326	sp|Q09666|AHNK_HUMAN	Neuroblast differentiation-associated protein AHNAK OS=Homo sapiens GN=AHNAK PE=1 SV=2	6	10	4	7	629	1.27	0.314739		1.66667
100430	sp|P35813|PPM1A_HUMAN	Protein phosphatase 1A OS=Homo sapiens GN=PPM1A PE=1 SV=1	15	10	6	4	42	76.61	0.315677		0.666667
100092	sp|P08238|HS90B_HUMAN	Heat shock protein HSP 90-beta OS=Homo sapiens GN=HSP90AB1 PE=1 SV=4	68	80	20	22	83	176.05	0.323674		1.17647
100305	sp|P55072|TERA_HUMAN	Transitional endoplasmic reticulum ATPase OS=Homo sapiens GN=VCP PE=1 SV=4	50	41	19	18	89	115.94	0.345053		0.82
100675	sp|P68104|EF1A1_HUMAN	Elongation factor 1-alpha 1 OS=Homo sapiens GN=EEF1A1 PE=1 SV=1	41	33	10	9	50	133.71	0.35191		0.804878
100429	sp|Q16658|FSCN1_HUMAN	Fascin OS=Homo sapiens GN=FSCN1 PE=1 SV=3	7	4	3	3	54	14.68	0.362666		0.571429
103225	sp|Q13464|ROCK1_HUMAN	Rho-associated protein kinase 1 OS=Homo sapiens GN=ROCK1 PE=1 SV=1	7	4	6	3	158	3.48	0.362666		0.571429
102501	sp|Q15084|PDIA6_HUMAN	Protein disulfide-isomerase A6 OS=Homo sapiens GN=PDIA6 PE=1 SV=1	12	8	5	3	48	47.82	0.369478		0.666667
100778	sp|P25789|PSA4_HUMAN	Proteasome subunit alpha type-4 OS=Homo sapiens GN=PSMA4 PE=1 SV=1	8	5	3	3	29	72.96	0.403259		0.625
101795	sp|Q00839|HNRPU_HUMAN	Heterogeneous nuclear ribonucleoprotein U OS=Homo sapiens GN=HNRNPU PE=1 SV=6	2	4	1	2	91	6.08	0.409726		2
105765	sp|Q92620|PRP16_HUMAN	Pre-mRNA-splicing factor ATP-dependent RNA helicase PRP16 OS=Homo sapiens GN=DHX38 PE=1 SV=2	2	4	2	3	140	2.14	0.409726		2
100467	sp|Q15019|SEPT2_HUMAN	Septin-2 OS=Homo sapiens GN=SEPT2 PE=1 SV=1	4	2	4	2	41	10.85	0.409726		0.5
101001	sp|Q01518|CAP1_HUMAN	Adenylyl cyclase-associated protein 1 OS=Homo sapiens GN=CAP1 PE=1 SV=5	11	15	3	6	52	25.06	0.431853		1.36364
100213	sp|P11021|GRP78_HUMAN	78 kDa glucose-regulated protein OS=Homo sapiens GN=HSPA5 PE=1 SV=2	16	12	9	8	72	37.35	0.448916		0.75
101842	sp|O75369|FLNB_HUMAN	Filamin-B OS=Homo sapiens GN=FLNB PE=1 SV=2	13	17	4	9	278	7.73	0.464544		1.30769
100471	sp|P07195|LDHB_HUMAN	L-lactate dehydrogenase B chain OS=Homo sapiens GN=LDHB PE=1 SV=2	7	10	4	5	37	55.99	0.465686		1.42857
100353	sp|P38646|GRP75_HUMAN	Stress-70 protein, mitochondrial OS=Homo sapiens GN=HSPA9 PE=1 SV=2	5	3	4	3	74	44.82	0.477162		0.6
100687	sp|P48643|TCPE_HUMAN	T-complex protein 1 subunit epsilon OS=Homo sapiens GN=CCT5 PE=1 SV=1	5	3	3	2	60	25.15	0.477162		0.6
101730	sp|P53396|ACLY_HUMAN	ATP-citrate synthase OS=Homo sapiens GN=ACLY PE=1 SV=3	14	18	9	9	121	30.22	0.478925		1.28571
100463	sp|Q14195|DPYL3_HUMAN	Dihydropyrimidinase-related protein 3 OS=Homo sapiens GN=DPYSL3 PE=1 SV=1	8	11	5	7	62	33.1	0.490389		1.375
100124	sp|P25705|ATPA_HUMAN	ATP synthase subunit alpha, mitochondrial OS=Homo sapiens GN=ATP5A1 PE=1 SV=1	11	8	6	5	60	30.98	0.490389		0.727273
101022	sp|Q99873|ANM1_HUMAN	Protein arginine N-methyltransferase 1 OS=Homo sapiens GN=PRMT1 PE=1 SV=2	11	8	5	4	41	40.97	0.490389		0.727273
102214	sp|P42704|LPPRC_HUMAN	Leucine-rich PPR motif-containing protein, mitochondrial OS=Homo sapiens GN=LRPPRC PE=1 SV=3	4	6	2	5	158	13.62	0.525693		1.5
100036	sp|P04075|ALDOA_HUMAN	Fructose-bisphosphate aldolase A OS=Homo sapiens GN=ALDOA PE=1 SV=2	6	4	3	3	39	44.42	0.525693		0.666667
101712	sp|P08865|RSSA_HUMAN	40S ribosomal protein SA OS=Homo sapiens GN=RPSA PE=1 SV=4	6	4	3	3	33	38.07	0.525693		0.666667
100189	sp|P10809|CH60_HUMAN	60 kDa heat shock protein, mitochondrial OS=Homo sapiens GN=HSPD1 PE=1 SV=2	22	18	12	11	61	78.67	0.526744		0.818182
102318	sp|P49327|FAS_HUMAN	Fatty acid synthase OS=Homo sapiens GN=FASN PE=1 SV=3	113	104	47	43	273	63.86	0.541168		0.920354
100542	sp|P14618|KPYM_HUMAN	Pyruvate kinase PKM OS=Homo sapiens GN=PKM PE=1 SV=4	72	65	21	21	58	308.28	0.549719		0.902778
100532	sp|P29401|TKT_HUMAN	Transketolase OS=Homo sapiens GN=TKT PE=1 SV=3	7	5	3	4	68	23.59	0.562791		0.714286
102431	sp|P34931|HS71L_HUMAN	Heat shock 70 kDa protein 1-like OS=Homo sapiens GN=HSPA1L PE=1 SV=2	7	5	3	2	70	17.06	0.562791		0.714286
103406	sp|Q6P3W7|SCYL2_HUMAN	SCY1-like protein 2 OS=Homo sapiens GN=SCYL2 PE=1 SV=1	35	40	14	17	104	64.64	0.563558		1.14286
100056	sp|P04406|G3P_HUMAN	Glyceraldehyde-3-phosphate dehydrogenase OS=Homo sapiens GN=GAPDH PE=1 SV=3	17	14	6	6	36	104.08	0.589723		0.823529
100674	sp|Q05639|EF1A2_HUMAN	Elongation factor 1-alpha 2 OS=Homo sapiens GN=EEF1A2 PE=1 SV=1	17	14	5	5	50	71.37	0.589723		0.823529
100095	sp|P14314|GLU2B_HUMAN	Glucosidase 2 subunit beta OS=Homo sapiens GN=PRKCSH PE=1 SV=2	3	2	2	2	59	4.21	0.653629		0.666667
102071	sp|P31689|DNJA1_HUMAN	DnaJ homolog subfamily A member 1 OS=Homo sapiens GN=DNAJA1 PE=1 SV=2	3	2	2	2	45	8.92	0.653629		0.666667
103327	sp|P49321|NASP_HUMAN	Nuclear autoantigenic sperm protein OS=Homo sapiens GN=NASP PE=1 SV=2	3	2	3	2	85	7.63	0.653629		0.666667
108586	sp|Q8IYT4|KATL2_HUMAN	Katanin p60 ATPase-containing subunit A-like 2 OS=Homo sapiens GN=KATNAL2 PE=2 SV=3	3	2	1	1	61	5.72	0.653629		0.666667
105181	sp|Q16875|F263_HUMAN	6-phosphofructo-2-kinase/fructose-2,6-bisphosphatase 3 OS=Homo sapiens GN=PFKFB3 PE=1 SV=1	12	10	7	6	60	39.45	0.669601		0.833333
101032	sp|Q92598|HS105_HUMAN	Heat shock protein 105 kDa OS=Homo sapiens GN=HSPH1 PE=1 SV=1	3	4	3	3	97	7.23	0.704976		1.33333
100523	sp|P27797|CALR_HUMAN	Calreticulin OS=Homo sapiens GN=CALR PE=1 SV=1	4	3	4	3	48	9.35	0.704976		0.75
101937	sp|Q9Y265|RUVB1_HUMAN	RuvB-like 1 OS=Homo sapiens GN=RUVBL1 PE=1 SV=1	4	3	4	3	50	16.93	0.704976		0.75
103120	sp|P22102|PUR2_HUMAN	Trifunctional purine biosynthetic protein adenosine-3 OS=Homo sapiens GN=GART PE=1 SV=1	4	3	2	2	108	3.25	0.704976		0.75
101103	sp|P26641|EF1G_HUMAN	Elongation factor 1-gamma OS=Homo sapiens GN=EEF1G PE=1 SV=3	16	14	6	6	50	48.91	0.7149		0.875
104504	sp|Q14315|FLNC_HUMAN	Filamin-C OS=Homo sapiens GN=FLNC PE=1 SV=3	38	35	21	17	291	18.57	0.725459		0.921053
100601	sp|P31153|METK2_HUMAN	S-adenosylmethionine synthase isoform type-2 OS=Homo sapiens GN=MAT2A PE=1 SV=1	4	5	2	3	44	68.75	0.738623		1.25
103223	sp|Q9Y5B9|SP16H_HUMAN	FACT complex subunit SPT16 OS=Homo sapiens GN=SUPT16H PE=1 SV=1	4	5	3	4	120	5.42	0.738623		1.25
100110	sp|Q16181|SEPT7_HUMAN	Septin-7 OS=Homo sapiens GN=SEPT7 PE=1 SV=2	5	4	4	2	51	22.71	0.738623		0.8
100314	sp|P30041|PRDX6_HUMAN	Peroxiredoxin-6 OS=Homo sapiens GN=PRDX6 PE=1 SV=3	5	4	4	3	25	47.96	0.738623		0.8
100543	sp|P12814|ACTN1_HUMAN	Alpha-actinin-1 OS=Homo sapiens GN=ACTN1 PE=1 SV=2	5	4	2	2	103	9.22	0.738623		0.8
100551	sp|Q00610|CLH1_HUMAN	Clathrin heavy chain 1 OS=Homo sapiens GN=CLTC PE=1 SV=5	5	4	2	3	191	2.35	0.738623		0.8
101164	sp|Q92734|TFG_HUMAN	Protein TFG OS=Homo sapiens GN=TFG PE=1 SV=2	5	4	3	3	43	16.12	0.738623		0.8
100033	sp|Q13885|TBB2A_HUMAN	Tubulin beta-2A chain OS=Homo sapiens GN=TUBB2A PE=1 SV=1	40	43	8	9	50	197.49	0.741907		1.075
100026	sp|P08670|VIME_HUMAN	Vimentin OS=Homo sapiens GN=VIM PE=1 SV=4	22	20	11	13	54	39.16	0.757576		0.909091
100365	sp|O43707|ACTN4_HUMAN	Alpha-actinin-4 OS=Homo sapiens GN=ACTN4 PE=1 SV=2	5	6	2	3	105	9.54	0.762866		1.2
101692	sp|Q9Y2H1|ST38L_HUMAN	Serine/threonine-protein kinase 38-like OS=Homo sapiens GN=STK38L PE=1 SV=3	25	23	11	9	54	78.75	0.772798		0.92
100096	sp|P63104|1433Z_HUMAN	14-3-3 protein zeta/delta OS=Homo sapiens GN=YWHAZ PE=1 SV=1	7	6	4	4	28	52.29	0.781406		0.857143
103021	sp|P22234|PUR6_HUMAN	Multifunctional protein ADE2 OS=Homo sapiens GN=PAICS PE=1 SV=3	9	10	7	5	47	64.82	0.818505		1.11111
101624	sp|Q9BUF5|TBB6_HUMAN	Tubulin beta-6 chain OS=Homo sapiens GN=TUBB6 PE=1 SV=1	10	11	4	3	50	51.18	0.827227		1.1
101500	sp|Q9Y490|TLN1_HUMAN	Talin-1 OS=Homo sapiens GN=TLN1 PE=1 SV=3	20	21	14	13	270	9.46	0.87589		1.05
100701	sp|P13639|EF2_HUMAN	Elongation factor 2 OS=Homo sapiens GN=EEF2 PE=1 SV=4	21	22	11	11	95	46.18	0.878788		1.04762
100080	sp|Q13509|TBB3_HUMAN	Tubulin beta-3 chain OS=Homo sapiens GN=TUBB3 PE=1 SV=2	22	23	6	8	50	119.04	0.881493		1.04545
100073	sp|P11142|HSP7C_HUMAN	Heat shock cognate 71 kDa protein OS=Homo sapiens GN=HSPA8 PE=1 SV=1	31	32	13	12	71	98.09	0.899739		1.03226
100041	cu|P07437|TBB5_HUMAN	NP_001280142.1 Tubulin beta chain (Tubulin beta-5 chain)	36	37	9	9	27	311.46	0.906826		1.02778
105036	sp|P23458|JAK1_HUMAN	Tyrosine-protein kinase JAK1 OS=Homo sapiens GN=JAK1 PE=1 SV=2	43	42	18	22	133	34.91	0.913626		0.976744
100254	sp|P20700|LMNB1_HUMAN	Lamin-B1 OS=Homo sapiens GN=LMNB1 PE=1 SV=2	2	2	1	1	66	3.01	1		1
101807	sp|Q12931|TRAP1_HUMAN	Heat shock protein 75 kDa, mitochondrial OS=Homo sapiens GN=TRAP1 PE=1 SV=3	2	2	1	1	80	7.49	1		1
102110	sp|Q99832|TCPH_HUMAN	T-complex protein 1 subunit eta OS=Homo sapiens GN=CCT7 PE=1 SV=2	2	2	1	1	59	13.48	1		1
103780	sp|Q9UHL4|DPP2_HUMAN	Dipeptidyl peptidase 2 OS=Homo sapiens GN=DPP7 PE=1 SV=3	2	2	2	2	54	14.73	1		1
116649	sp|P35030|TRY3_HUMAN	Trypsin-3 OS=Homo sapiens GN=PRSS3 PE=1 SV=2	2	2	1	1	33	12.3	1		1
100105	sp|P62736|ACTA_HUMAN	Actin, aortic smooth muscle OS=Homo sapiens GN=ACTA2 PE=1 SV=1	3	3	1	1	42	7.15	1		1
101031	sp|P34932|HSP74_HUMAN	Heat shock 70 kDa protein 4 OS=Homo sapiens GN=HSPA4 PE=1 SV=4	3	3	3	3	94	6.36	1		1
101735	sp|P35637|FUS_HUMAN	RNA-binding protein FUS OS=Homo sapiens GN=FUS PE=1 SV=1	3	3	2	3	53	12.17	1		1
100078	sp|Q06830|PRDX1_HUMAN	Peroxiredoxin-1 OS=Homo sapiens GN=PRDX1 PE=1 SV=1	4	4	3	3	22	36.2	1		1
100748	sp|Q14697|GANAB_HUMAN	Neutral alpha-glucosidase AB OS=Homo sapiens GN=GANAB PE=1 SV=3	4	4	3	4	107	3.75	1		1
103211	sp|Q9P2R3|ANFY1_HUMAN	Rabankyrin-5 OS=Homo sapiens GN=ANKFY1 PE=1 SV=2	4	4	4	3	128	5.07	1		1
104270	sp|P17066|HSP76_HUMAN	Heat shock 70 kDa protein 6 OS=Homo sapiens GN=HSPA6 PE=1 SV=2	4	4	2	2	71	10.57	1		1
100518	sp|Q9UHD8|SEPT9_HUMAN	Septin-9 OS=Homo sapiens GN=SEPT9 PE=1 SV=2	5	5	3	4	65	12.24	1		1
100215	sp|P06733|ENOA_HUMAN	Alpha-enolase OS=Homo sapiens GN=ENO1 PE=1 SV=2	6	6	2	3	47	46.67	1		1
102536	sp|Q9Y4E8|UBP15_HUMAN	Ubiquitin carboxyl-terminal hydrolase 15 OS=Homo sapiens GN=USP15 PE=1 SV=3	6	6	5	4	112	13.35	1		1
100263	sp|P07355|ANXA2_HUMAN	Annexin A2 OS=Homo sapiens GN=ANXA2 PE=1 SV=2	8	8	6	5	39	20.74	1		1
101113	sp|P49411|EFTU_HUMAN	Elongation factor Tu, mitochondrial OS=Homo sapiens GN=TUFM PE=1 SV=2	9	9	4	5	50	36.36	1		1
102171	sp|Q3ZCM7|TBB8_HUMAN	Tubulin beta-8 chain OS=Homo sapiens GN=TUBB8 PE=1 SV=2	11	11	2	2	50	50.26	1		1
108339	sp|Q9Y6Y0|NS1BP_HUMAN	Influenza virus NS1A-binding protein OS=Homo sapiens GN=IVNS1ABP PE=1 SV=3	12	12	6	6	72	29.99	1		1

## Sheet: Methods & Figure1
Methods
The proteins in the gel bands are reduced with dithiothreitol to break disulfide bond and the Cys residues are alkylated by iodoacetamide to allow the recovery of Cys-containing peptides. The gel bands are then washed, dried down in a speed vacuum, and rehydrated with a buffer containing a protease to allow the protease enter the gel. For routine protein identification, trypsin is used for overni…
The peptide sample are loaded on a nanoscale capillary reverse phase C18 column by a HPLC system (Thermo EasynLC 1000), and eluted by a gradient (~90 min). The eluted peptides are ionized by electrospray ionization, and detected by an inline mass spectrometer (Thermo Elite). The MS spectra are collected first and the 20 most abundant ions are sequentially isolated for MS/MS analysis. This process…
Database searches are performed using Sequest search engine in our in-house SPIDERS software package. All matched MS/MS spectra were filtered by mass accuracy and matching scores to reduce protein false discovery rate to ~1%. Finally, all proteins identified in one gel lane are combined together. The total number of spectra, namely spectral counts (SC), matching to individual proteins may reflect…
Figure 1. Stained SDS Gel image of submitted samples. The numbers indicate excised gel bands for digestion and LC-MS/MS.

## Sheet: BE2C
Attention: this table may include multiple pages.
Cntrl vs IP (BE2C)- Spectral count comparison of proteins identified from the Cntrl and IP samples
SC: the summed number of spectral counts (i.e. MS/MS scans) assigned to one identified protein; TP: total number of peptides identified for a protein; Group: Identified proteins that share one or more peptides are grouped together (e.g. 01). The group is represented by the protein with maximal spectra count (e.g. 01.1). If other proteins in the same group are assigned with at least one uniquely i…
Group	Reference	Description	SC BE2CCntrl	SC BE2CIP	TP BE2CCntrl	TP BE2CIP	Mass (KD)	Abundance	p-value
105353	sp|Q6NYC1|JMJD6_HUMAN	Bifunctional arginine demethylase and lysyl-hydroxylase JMJD6 OS=Homo sapiens GN=JMJD6 PE=1 SV=1	0.1	349	0	17	46	1599.04	7.37244e-107		3490		JMJD6
104666	sp|Q8WUA2|PPIL4_HUMAN	Peptidyl-prolyl cis-trans isomerase-like 4 OS=Homo sapiens GN=PPIL4 PE=1 SV=1	0.1	18	0	8	57	28.85	1.03991e-06		180		PPIL4
103575	sp|O95232|LC7L3_HUMAN	Luc7-like protein 3 OS=Homo sapiens GN=LUC7L3 PE=1 SV=2	0.1	12	0	5	51	35.97	7.76021e-05		120		LUC7L3
100663	sp|O60825|F262_HUMAN	6-phosphofructo-2-kinase/fructose-2,6-bisphosphatase 2 OS=Homo sapiens GN=PFKFB2 PE=1 SV=2	0.1	5	0	4	58	2.57	0.013628		50		PFKFB2
101701	sp|Q9UHX1|PUF60_HUMAN	Poly(U)-binding-splicing factor PUF60 OS=Homo sapiens GN=PUF60 PE=1 SV=1	0.1	4	0	2	60	11.7	0.0294083		40		PUF60
104322	sp|Q9Y657|SPIN1_HUMAN	Spindlin-1 OS=Homo sapiens GN=SPIN1 PE=1 SV=3	0.1	4	0	3	30	13.52	0.0294083		40		SPIN1
107406	sp|Q5T749|KPRP_HUMAN	Keratinocyte proline-rich protein OS=Homo sapiens GN=KPRP PE=1 SV=1	0.1	4	0	3	64	3.12	0.0294083		40		KPRP
100467	sp|Q15019|SEPT2_HUMAN	Septin-2 OS=Homo sapiens GN=SEPT2 PE=1 SV=1	0.1	3	0	3	41	10.85	0.0646465		30		SEPT2
102071	sp|P31689|DNJA1_HUMAN	DnaJ homolog subfamily A member 1 OS=Homo sapiens GN=DNAJA1 PE=1 SV=2	0.1	3	0	2	45	8.92	0.0646465		30		DNAJA1
102895	sp|Q9Y383|LC7L2_HUMAN	Putative RNA-binding protein Luc7-like 2 OS=Homo sapiens GN=LUC7L2 PE=1 SV=2	0.1	3	0	2	46	20.44	0.0646465		30		LUC7L2
100277	sp|P62081|RS7_HUMAN	40S ribosomal protein S7 OS=Homo sapiens GN=RPS7 PE=1 SV=1	0.1	2	0	1	22	4.52	0.146612		20		RPS7
101488	sp|Q16630|CPSF6_HUMAN	Cleavage and polyadenylation specificity factor subunit 6 OS=Homo sapiens GN=CPSF6 PE=1 SV=2	0.1	2	0	1	59	4.22	0.146612		20		CPSF6
108577	sp|Q8IX18|DHX40_HUMAN	Probable ATP-dependent RNA helicase DHX40 OS=Homo sapiens GN=DHX40 PE=1 SV=2	0.1	2	0	1	89	2.82	0.146612		20		DHX40
108586	sp|Q8IYT4|KATL2_HUMAN	Katanin p60 ATPase-containing subunit A-like 2 OS=Homo sapiens GN=KATNAL2 PE=2 SV=3	0.1	2	0	1	61	5.72	0.146612		20		KATNAL2

## Sheet: SKNAS
Attention: this table may include multiple pages.
Cntrl vs IP (SKNAS)- Spectral count comparison of proteins identified from the Cntrl and IP samples
SC: the summed number of spectral counts (i.e. MS/MS scans) assigned to one identified protein; TP: total number of peptides identified for a protein; Group: Identified proteins that share one or more peptides are grouped together (e.g. 01). The group is represented by the protein with maximal spectra count (e.g. 01.1). If other proteins in the same group are assigned with at least one uniquely i…
Group	Reference	Description	SC SKNASCntrl	SC SKNASIP	TP SKNASCntrl	TP SKNASIP	Mass (KD)	Abundance	p-value
105353	sp|Q6NYC1|JMJD6_HUMAN	Bifunctional arginine demethylase and lysyl-hydroxylase JMJD6 OS=Homo sapiens GN=JMJD6 PE=1 SV=1	0.1	1136	0	20	46	1599.04	0		11360		JMJD6	JMJD6
108037	sp|Q14562|DHX8_HUMAN	ATP-dependent RNA helicase DHX8 OS=Homo sapiens GN=DHX8 PE=1 SV=1	0.1	45	0	22	139	16.16	5.42535e-15		450		DHX8	DHX8
103575	sp|O95232|LC7L3_HUMAN	Luc7-like protein 3 OS=Homo sapiens GN=LUC7L3 PE=1 SV=2	0.1	25	0	9	51	35.97	7.15836e-09		250		LC7L3	LUC7L3
104481	sp|P26368|U2AF2_HUMAN	Splicing factor U2AF 65 kDa subunit OS=Homo sapiens GN=U2AF2 PE=1 SV=4	0.1	24	0	8	53	22.44	1.45449e-08		240		U2AF2	U2AF2
102895	sp|Q9Y383|LC7L2_HUMAN	Putative RNA-binding protein Luc7-like 2 OS=Homo sapiens GN=LUC7L2 PE=1 SV=2	0.1	16	0	8	46	20.44	4.35092e-06		160		LC7L2	LUC7L2
104666	sp|Q8WUA2|PPIL4_HUMAN	Peptidyl-prolyl cis-trans isomerase-like 4 OS=Homo sapiens GN=PPIL4 PE=1 SV=1	0.1	15	0	8	57	28.85	8.91784e-06		150		PPIL4	PPIL4
100985	sp|P62913|RL11_HUMAN	60S ribosomal protein L11 OS=Homo sapiens GN=RPL11 PE=1 SV=2	0.1	13	0	5	20	32.11	3.76529e-05		130		RL11	RPL11
101701	sp|Q9UHX1|PUF60_HUMAN	Poly(U)-binding-splicing factor PUF60 OS=Homo sapiens GN=PUF60 PE=1 SV=1	0.1	10	0	9	60	11.7	0.000332193		100		PUF60	PUF60
100152	sp|P35268|RL22_HUMAN	60S ribosomal protein L22 OS=Homo sapiens GN=RPL22 PE=1 SV=2	0.1	8	0	3	15	54.13	0.00144197		80		RL22	RPL22
100970	sp|P08708|RS17_HUMAN	40S ribosomal protein S17 OS=Homo sapiens GN=RPS17 PE=1 SV=2	0.1	7	0	2	16	22.52	0.00302626		70		RS17	RPS17
101686	sp|P27635|RL10_HUMAN	60S ribosomal protein L10 OS=Homo sapiens GN=RPL10 PE=1 SV=4	0.1	7	0	4	25	14.23	0.00302626		70		RL10	RPL10
100048	sp|P23528|COF1_HUMAN	Cofilin-1 OS=Homo sapiens GN=CFL1 PE=1 SV=3	0.1	6	0	3	18	43.26	0.00639365		60		COF1	CFL1
100548	sp|P23246|SFPQ_HUMAN	Splicing factor, proline- and glutamine-rich OS=Homo sapiens GN=SFPQ PE=1 SV=2	0.1	6	0	5	76	7.23	0.00639365		60		SFPQ	SFPQ
102297	sp|Q14498|RBM39_HUMAN	RNA-binding protein 39 OS=Homo sapiens GN=RBM39 PE=1 SV=2	0.1	6	0	4	59	5.06	0.00639365		60		RBM39	RBM39
101657	sp|O60841|IF2P_HUMAN	Eukaryotic translation initiation factor 5B OS=Homo sapiens GN=EIF5B PE=1 SV=4	0.1	5	0	5	139	1.8	0.013628		50		IF2P	EIF5B
102527	sp|Q00341|VIGLN_HUMAN	Vigilin OS=Homo sapiens GN=HDLBP PE=1 SV=2	0.1	5	0	4	141	1.77	0.013628		50		VIGIN	HDLBP
100994	sp|P13010|XRCC5_HUMAN	X-ray repair cross-complementing protein 5 OS=Homo sapiens GN=XRCC5 PE=1 SV=3	0.1	4	0	4	83	11.49	0.0294083		40		XRCC5	XRCC5
101428	sp|Q93009|UBP7_HUMAN	Ubiquitin carboxyl-terminal hydrolase 7 OS=Homo sapiens GN=USP7 PE=1 SV=2	0.1	4	0	4	128	6.63	0.0294083		40		UBP7	UBP7
102123	sp|Q7L014|DDX46_HUMAN	Probable ATP-dependent RNA helicase DDX46 OS=Homo sapiens GN=DDX46 PE=1 SV=2	0.1	4	0	4	117	1.71	0.0294083		40		DDX46	DDX46
104239	sp|Q9NQ29|LUC7L_HUMAN	Putative RNA-binding protein Luc7-like 1 OS=Homo sapiens GN=LUC7L PE=1 SV=1	0.1	4	0	4	44	4.58	0.0294083		40		LUC7L	LUC7L
100116	sp|P02545|LMNA_HUMAN	Prelamin-A/C OS=Homo sapiens GN=LMNA PE=1 SV=1	0.1	3	0	2	74	2.02	0.0646465		30		LMNA	LMNA
100706	sp|P62979|RS27A_HUMAN	Ubiquitin-40S ribosomal protein S27a OS=Homo sapiens GN=RPS27A PE=1 SV=2	0.1	3	0	3	18	8.35	0.0646465		30		RS27A	RPS27A
100847	sp|O00571|DDX3X_HUMAN	ATP-dependent RNA helicase DDX3X OS=Homo sapiens GN=DDX3X PE=1 SV=3	0.1	3	0	3	73	11.61	0.0646465		30		DDX3X	DDX3X
101488	sp|Q16630|CPSF6_HUMAN	Cleavage and polyadenylation specificity factor subunit 6 OS=Homo sapiens GN=CPSF6 PE=1 SV=2	0.1	3	0	3	59	4.22	0.0646465		30		CPSF6	CPSF6
102932	sp|Q14974|IMB1_HUMAN	Importin subunit beta-1 OS=Homo sapiens GN=KPNB1 PE=1 SV=2	0.1	3	0	3	97	3.09	0.0646465		30		IMB1	KPNB1
104956	sp|Q9P270|SLAI2_HUMAN	SLAIN motif-containing protein 2 OS=Homo sapiens GN=SLAIN2 PE=1 SV=2	0.1	3	0	2	63	2.4	0.0646465		30		SLAI2	SLAIN2
108577	sp|Q8IX18|DHX40_HUMAN	Probable ATP-dependent RNA helicase DHX40 OS=Homo sapiens GN=DHX40 PE=1 SV=2	0.1	3	0	1	89	2.82	0.0646465		30		DHX40	DHX40
100087	sp|Q14240|IF4A2_HUMAN	Eukaryotic initiation factor 4A-II OS=Homo sapiens GN=EIF4A2 PE=1 SV=2	0.1	2	0	2	46	4.31	0.146612		20		IF4A2	EIF4A2
100218	sp|P60842|IF4A1_HUMAN	Eukaryotic initiation factor 4A-I OS=Homo sapiens GN=EIF4A1 PE=1 SV=1	0.1	2	0	2	46	5.42	0.146612		20		IF4A1	EIF4A1
100236	sp|P23284|PPIB_HUMAN	Peptidyl-prolyl cis-trans isomerase B OS=Homo sapiens GN=PPIB PE=1 SV=2	0.1	2	0	2	24	4.21	0.146612		20		PPIB	PPIB
100317	sp|Q15233|NONO_HUMAN	Non-POU domain-containing octamer-binding protein OS=Homo sapiens GN=NONO PE=1 SV=4	0.1	2	0	1	54	6.46	0.146612		20		NONO	NONO
100347	sp|P35579|MYH9_HUMAN	Myosin-9 OS=Homo sapiens GN=MYH9 PE=1 SV=4	0.1	2	0	2	226	0.88	0.146612		20		MYH9	MYH9
100441	sp|P15531|NDKA_HUMAN	Nucleoside diphosphate kinase A OS=Homo sapiens GN=NME1 PE=1 SV=1	0.1	2	0	2	17	5.83	0.146612		20		NDKA	NME1
100578	sp|O43242|PSMD3_HUMAN	26S proteasome non-ATPase regulatory subunit 3 OS=Homo sapiens GN=PSMD3 PE=1 SV=2	0.1	2	0	2	61	1.64	0.146612		20		PSMD3	PSMD3
100843	sp|P67809|YBOX1_HUMAN	Nuclease-sensitive element-binding protein 1 OS=Homo sapiens GN=YBX1 PE=1 SV=3	0.1	2	0	1	36	2.79	0.146612		20		YBOX1	YBX1
101154	sp|P55884|EIF3B_HUMAN	Eukaryotic translation initiation factor 3 subunit B OS=Homo sapiens GN=EIF3B PE=1 SV=3	0.1	2	0	2	92	2.16	0.146612		20		EIF3B	EIF3B
101609	cu|P78347|GTF2I_HUMAN	NP_001267729.1 General transcription factor II-I (GTFII-I) (TFII-I) (Bruton tyrosine kinase-associated protein 135) (BAP-135) (BTK-associated protein 135) (SRF-Phox1-interacting protein) (SPIN) (Williams-Beuren syndrome chromosomal region 6 protein)	0.1	2	0	2	30	16.45	0.146612		20		GTF2I	GTF2I
102153	sp|Q9NS86|LANC2_HUMAN	LanC-like protein 2 OS=Homo sapiens GN=LANCL2 PE=1 SV=1	0.1	2	0	2	51	1.97	0.146612		20		LANC2	LANCL2
102245	sp|Q14103|HNRPD_HUMAN	Heterogeneous nuclear ribonucleoprotein D0 OS=Homo sapiens GN=HNRNPD PE=1 SV=1	0.1	2	0	1	38	2.6	0.146612		20		HNRPD	HNRNPD
102399	sp|Q9C0C9|UBE2O_HUMAN	E2/E3 hybrid ubiquitin-protein ligase UBE2O OS=Homo sapiens GN=UBE2O PE=1 SV=3	0.1	2	0	1	141	0.71	0.146612		20		UBE2O	UBE2O
102456	sp|Q8NE71|ABCF1_HUMAN	ATP-binding cassette sub-family F member 1 OS=Homo sapiens GN=ABCF1 PE=1 SV=2	0.1	2	0	2	96	1.04	0.146612		20		ABCF1	ABCF1
102550	sp|Q92499|DDX1_HUMAN	ATP-dependent RNA helicase DDX1 OS=Homo sapiens GN=DDX1 PE=1 SV=2	0.1	2	0	2	82	4.25	0.146612		20		DDX1	DDX1
102650	sp|Q08945|SSRP1_HUMAN	FACT complex subunit SSRP1 OS=Homo sapiens GN=SSRP1 PE=1 SV=1	0.1	2	0	2	81	1.23	0.146612		20		SSRP1	SSRP1
104758	sp|P06748|NPM_HUMAN	Nucleophosmin OS=Homo sapiens GN=NPM1 PE=1 SV=2	0.1	2	0	2	33	27.64	0.146612		20		NPM	NPM1
104922	sp|Q14331|FRG1_HUMAN	Protein FRG1 OS=Homo sapiens GN=FRG1 PE=1 SV=1	0.1	2	0	1	29	3.43	0.146612		20		FRG1	FRG1
107151	sp|Q12872|SFSWA_HUMAN	Splicing factor, suppressor of white-apricot homolog OS=Homo sapiens GN=SFSWAP PE=1 SV=3	0.1	2	0	2	105	0.95	0.146612		20		SFSWA	SFSWAP
108173	sp|Q9P1Y6|PHRF1_HUMAN	PHD and RING finger domain-containing protein 1 OS=Homo sapiens GN=PHRF1 PE=1 SV=3	0.1	2	0	2	179	0.56	0.146612		20		PHRF1	PHRF1
