# Supplementary material for: Metabolic reprogramming of cancer cells by JMJD6-mediated pre-mRNA splicing associated with therapeutic response to splicing inhibitor
Source: eLife. 2024 Mar 15;12:RP90993. doi: 10.7554/eLife.90993 (PMC10942784; doi:10.7554/eLife.90993)
Supplement: Source data 1. [file elife-90993-data1.zip]

Archive with 56 entries (56 files):
- Figure 3A-D-source data. Correlation of JMJD6 KO and its co-dependency genes.csv
- __MACOSX/._Figure 3A-D-source data. Correlation of JMJD6 KO and its co-dependency genes.csv
- Figure 4B-source data.xls
- __MACOSX/._Figure 4B-source data.xls
- Figrue 7-data source.xlsx
- __MACOSX/._Figrue 7-data source.xlsx
- Figure 1 data source.xlsx
- __MACOSX/._Figure 1 data source.xlsx
- Figure 1A- source data.xlsx
- __MACOSX/._Figure 1A- source data.xlsx
- Figure 2 Data source.xlsx
- __MACOSX/._Figure 2 Data source.xlsx
- Figure 2-Supplement 2C-data source.xlsx
- __MACOSX/._Figure 2-Supplement 2C-data source.xlsx
- Figure 3 Data source.xlsx
- __MACOSX/._Figure 3 Data source.xlsx
- Figure 3-Supplement 2B-data source .xlsx
- __MACOSX/._Figure 3-Supplement 2B-data source .xlsx
- Figure 3F-source data.xlsx
- __MACOSX/._Figure 3F-source data.xlsx
- Figure 3H-source data.xlsx
- __MACOSX/._Figure 3H-source data.xlsx
- Figure 4-data source.xlsx
- __MACOSX/._Figure 4-data source.xlsx
- Figure 5-data source.xlsx
- __MACOSX/._Figure 5-data source.xlsx
- Figure 5-supplement 1-data source.xlsx
- __MACOSX/._Figure 5-supplement 1-data source.xlsx
- Figure 8-data source.xlsx
- __MACOSX/._Figure 8-data source.xlsx
- Figure 1-supplement 1-data source.docx
- __MACOSX/._Figure 1-supplement 1-data source.docx
- Figure 1-supplement 2-data source.docx
- __MACOSX/._Figure 1-supplement 2-data source.docx
- Figure 2-supplement 1-data source.docx
- __MACOSX/._Figure 2-supplement 1-data source.docx
- Figure 2-Supplement 2-data source.docx
- __MACOSX/._Figure 2-Supplement 2-data source.docx
- Figure 2 data source.pdf
- __MACOSX/._Figure 2 data source.pdf
- Figure 3-supplement 1-data source.pdf
- __MACOSX/._Figure 3-supplement 1-data source.pdf
- Figure 4-data source.pdf
- __MACOSX/._Figure 4-data source.pdf
- Figure 5-data source.pdf
- __MACOSX/._Figure 5-data source.pdf
- Figure 6-data source.pdf
- __MACOSX/._Figure 6-data source.pdf
- Figure 7-supplenment 1-data source.pdf
- __MACOSX/._Figure 7-supplenment 1-data source.pdf
- Figure 8-data source.pdf
- __MACOSX/._Figure 8-data source.pdf
- Figure 3-supplement 2A (BE2C) source data .txt
- __MACOSX/._Figure 3-supplement 2A (BE2C) source data .txt
- Figure 3-supplement 2A (SKNAS) source data .txt
- __MACOSX/._Figure 3-supplement 2A (SKNAS) source data .txt
