# Supplementary material for: Metabolic reprogramming of cancer cells by JMJD6-mediated pre-mRNA splicing associated with therapeutic response to splicing inhibitor
Source: eLife. 2024 Mar 15;12:RP90993. doi: 10.7554/eLife.90993 (PMC10942784; doi:10.7554/eLife.90993)
Supplement: Source data 1. [file elife-90993-data1.zip › Figure 3-supplement 2A (BE2C) source data .txt]

NAME	GS<br> follow link to MSigDB	GS DETAILS	SIZE	ES	NES	NOM p-val	FDR q-val	FWER p-val	RANK AT MAX	LEADING EDGE
ROSTY_CERVICAL_CANCER_PROLIFERATION_CLUSTER	ROSTY_CERVICAL_CANCER_PROLIFERATION_CLUSTER	Details ...	136	-0.7745873	-3.454651	0	0	0	2807	tags=79%, list=16%, signal=93%
REACTOME_AMYLOIDS	REACTOME_AMYLOIDS	Details ...	67	-0.8426493	-3.4068723	0	0	0	1300	tags=73%, list=7%, signal=79%
REACTOME_RNA_POL_I_PROMOTER_OPENING	REACTOME_RNA_POL_I_PROMOTER_OPENING	Details ...	57	-0.8821191	-3.398437	0	0	0	1300	tags=84%, list=7%, signal=90%
SOTIRIOU_BREAST_CANCER_GRADE_1_VS_3_UP	SOTIRIOU_BREAST_CANCER_GRADE_1_VS_3_UP	Details ...	146	-0.74411106	-3.3803027	0	0	0	2807	tags=70%, list=16%, signal=82%
REACTOME_DEPOSITION_OF_NEW_CENPA_CONTAINING_NUCLEOSOMES_AT_THE_CENTROMERE	REACTOME_DEPOSITION_OF_NEW_CENPA_CONTAINING_NUCLEOSOMES_AT_THE_CENTROMERE	Details ...	60	-0.8350488	-3.3501816	0	0	0	1758	tags=75%, list=10%, signal=83%
KOBAYASHI_EGFR_SIGNALING_24HR_DN	KOBAYASHI_EGFR_SIGNALING_24HR_DN	Details ...	240	-0.7021108	-3.3284142	0	0	0	3257	tags=68%, list=18%, signal=82%
REACTOME_MEIOTIC_RECOMBINATION	REACTOME_MEIOTIC_RECOMBINATION	Details ...	77	-0.81578606	-3.3161924	0	0	0	1636	tags=71%, list=9%, signal=78%
LEE_EARLY_T_LYMPHOCYTE_UP	LEE_EARLY_T_LYMPHOCYTE_UP	Details ...	93	-0.7479414	-3.2651308	0	0	0	2835	tags=76%, list=16%, signal=90%
REACTOME_RNA_POL_I_TRANSCRIPTION	REACTOME_RNA_POL_I_TRANSCRIPTION	Details ...	81	-0.7962167	-3.2635908	0	0	0	1300	tags=60%, list=7%, signal=65%
REACTOME_PACKAGING_OF_TELOMERE_ENDS	REACTOME_PACKAGING_OF_TELOMERE_ENDS	Details ...	45	-0.860872	-3.223433	0	0	0	1300	tags=78%, list=7%, signal=84%
KEGG_SYSTEMIC_LUPUS_ERYTHEMATOSUS	KEGG_SYSTEMIC_LUPUS_ERYTHEMATOSUS	Details ...	92	-0.7597803	-3.2135122	0	0	0	1300	tags=62%, list=7%, signal=66%
WHITEFORD_PEDIATRIC_CANCER_MARKERS	WHITEFORD_PEDIATRIC_CANCER_MARKERS	Details ...	112	-0.70472455	-3.1374366	0	0	0	3301	tags=72%, list=18%, signal=88%
REACTOME_RNA_POL_I_RNA_POL_III_AND_MITOCHONDRIAL_TRANSCRIPTION	REACTOME_RNA_POL_I_RNA_POL_III_AND_MITOCHONDRIAL_TRANSCRIPTION	Details ...	114	-0.7139961	-3.1328146	0	0	0	1348	tags=46%, list=7%, signal=49%
REACTOME_TELOMERE_MAINTENANCE	REACTOME_TELOMERE_MAINTENANCE	Details ...	72	-0.7558776	-3.1211917	0	0	0	2426	tags=63%, list=13%, signal=72%
CROONQUIST_NRAS_SIGNALING_DN	CROONQUIST_NRAS_SIGNALING_DN	Details ...	72	-0.7659024	-3.1013477	0	0	0	3390	tags=85%, list=19%, signal=104%
HOFFMANN_LARGE_TO_SMALL_PRE_BII_LYMPHOCYTE_UP	HOFFMANN_LARGE_TO_SMALL_PRE_BII_LYMPHOCYTE_UP	Details ...	154	-0.70793134	-3.101178	0	0	0	3252	tags=68%, list=18%, signal=82%
CHANG_CYCLING_GENES	CHANG_CYCLING_GENES	Details ...	142	-0.6903617	-3.092427	0	0	0	2848	tags=70%, list=16%, signal=82%
REACTOME_MEIOSIS	REACTOME_MEIOSIS	Details ...	101	-0.71332705	-3.0747535	0	0	0	1636	tags=55%, list=9%, signal=61%
KONG_E2F3_TARGETS	KONG_E2F3_TARGETS	Details ...	91	-0.73659885	-3.0369241	0	0	0	2603	tags=70%, list=14%, signal=82%
MISSIAGLIA_REGULATED_BY_METHYLATION_DN	MISSIAGLIA_REGULATED_BY_METHYLATION_DN	Details ...	117	-0.6786805	-2.9973812	0	0	0	3443	tags=65%, list=19%, signal=80%
MORI_IMMATURE_B_LYMPHOCYTE_DN	MORI_IMMATURE_B_LYMPHOCYTE_DN		89	-0.69946325	-2.9817739	0	0	0	3576	tags=72%, list=20%, signal=89%
HORIUCHI_WTAP_TARGETS_DN	HORIUCHI_WTAP_TARGETS_DN		296	-0.5999749	-2.9769888	0	0	0	3287	tags=55%, list=18%, signal=66%
ZHANG_TLX_TARGETS_DN	ZHANG_TLX_TARGETS_DN		85	-0.7134055	-2.972224	0	0	0	3582	tags=80%, list=20%, signal=99%
WHITFIELD_CELL_CYCLE_LITERATURE	WHITFIELD_CELL_CYCLE_LITERATURE		44	-0.8070239	-2.9669137	0	0	0	2233	tags=77%, list=12%, signal=88%
REACTOME_CELL_CYCLE	REACTOME_CELL_CYCLE		387	-0.5847898	-2.9632192	0	0	0	3454	tags=48%, list=19%, signal=58%
SONG_TARGETS_OF_IE86_CMV_PROTEIN	SONG_TARGETS_OF_IE86_CMV_PROTEIN		60	-0.71220815	-2.9522712	0	0	0	2729	tags=67%, list=15%, signal=78%
ISHIDA_E2F_TARGETS	ISHIDA_E2F_TARGETS		51	-0.7736019	-2.942788	0	0	0	3301	tags=82%, list=18%, signal=101%
CROONQUIST_IL6_DEPRIVATION_DN	CROONQUIST_IL6_DEPRIVATION_DN		98	-0.70755965	-2.942154	0	0	0	3301	tags=85%, list=18%, signal=103%
KANG_DOXORUBICIN_RESISTANCE_UP	KANG_DOXORUBICIN_RESISTANCE_UP		53	-0.77431494	-2.9375482	0	0	0	2835	tags=83%, list=16%, signal=98%
WINNEPENNINCKX_MELANOMA_METASTASIS_UP	WINNEPENNINCKX_MELANOMA_METASTASIS_UP		153	-0.63601613	-2.9067464	0	0	0	2835	tags=54%, list=16%, signal=64%
GRAHAM_CML_DIVIDING_VS_NORMAL_QUIESCENT_UP	GRAHAM_CML_DIVIDING_VS_NORMAL_QUIESCENT_UP		163	-0.6393612	-2.8981156	0	0	0	3104	tags=64%, list=17%, signal=77%
REACTOME_DNA_REPLICATION	REACTOME_DNA_REPLICATION		184	-0.6091272	-2.8933544	0	0	0	3454	tags=51%, list=19%, signal=62%
REN_BOUND_BY_E2F	REN_BOUND_BY_E2F		61	-0.721278	-2.87328	0	0	0	3316	tags=69%, list=18%, signal=84%
REACTOME_MEIOTIC_SYNAPSIS	REACTOME_MEIOTIC_SYNAPSIS		64	-0.7163152	-2.8726153	0	0	0	1300	tags=56%, list=7%, signal=60%
MORI_LARGE_PRE_BII_LYMPHOCYTE_UP	MORI_LARGE_PRE_BII_LYMPHOCYTE_UP		81	-0.6804671	-2.8692236	0	0	0	4164	tags=77%, list=23%, signal=99%
REACTOME_CHROMOSOME_MAINTENANCE	REACTOME_CHROMOSOME_MAINTENANCE		111	-0.67659926	-2.866469	0	0	0	3316	tags=65%, list=18%, signal=79%
BENPORATH_PROLIFERATION	BENPORATH_PROLIFERATION		136	-0.61922926	-2.8439205	0	0	0	3390	tags=57%, list=19%, signal=69%
ZHAN_MULTIPLE_MYELOMA_PR_UP	ZHAN_MULTIPLE_MYELOMA_PR_UP		44	-0.7636049	-2.833209	0	0	0	3347	tags=86%, list=19%, signal=106%
ZHANG_TLX_TARGETS_36HR_DN	ZHANG_TLX_TARGETS_36HR_DN		181	-0.604169	-2.8315835	0	0	0	4241	tags=68%, list=24%, signal=88%
PUJANA_XPRSS_INT_NETWORK	PUJANA_XPRSS_INT_NETWORK		163	-0.61048144	-2.8141804	0	0	0	4130	tags=69%, list=23%, signal=88%
ZHANG_TLX_TARGETS_60HR_DN	ZHANG_TLX_TARGETS_60HR_DN		260	-0.58334696	-2.8074906	0	0	0	3527	tags=61%, list=20%, signal=74%
REICHERT_MITOSIS_LIN9_TARGETS	REICHERT_MITOSIS_LIN9_TARGETS		28	-0.8248601	-2.80029	0	0	0	2147	tags=75%, list=12%, signal=85%
MARKEY_RB1_ACUTE_LOF_DN	MARKEY_RB1_ACUTE_LOF_DN		211	-0.5938325	-2.7918334	0	0	0	3441	tags=60%, list=19%, signal=73%
ODONNELL_TFRC_TARGETS_DN	ODONNELL_TFRC_TARGETS_DN		116	-0.62876815	-2.7914448	0	0	0	2498	tags=58%, list=14%, signal=67%
REACTOME_MITOTIC_M_M_G1_PHASES	REACTOME_MITOTIC_M_M_G1_PHASES		164	-0.5940241	-2.7868748	0	0	0	3454	tags=49%, list=19%, signal=60%
GRAHAM_NORMAL_QUIESCENT_VS_NORMAL_DIVIDING_DN	GRAHAM_NORMAL_QUIESCENT_VS_NORMAL_DIVIDING_DN		81	-0.66963214	-2.778925	0	0	0	3390	tags=75%, list=19%, signal=92%
KAUFFMANN_MELANOMA_RELAPSE_UP	KAUFFMANN_MELANOMA_RELAPSE_UP		58	-0.73130506	-2.7720535	0	0	0	2686	tags=62%, list=15%, signal=73%
CHEMNITZ_RESPONSE_TO_PROSTAGLANDIN_E2_UP	CHEMNITZ_RESPONSE_TO_PROSTAGLANDIN_E2_UP		138	-0.627758	-2.7693834	0	0	0	3016	tags=57%, list=17%, signal=68%
FERREIRA_EWINGS_SARCOMA_UNSTABLE_VS_STABLE_UP	FERREIRA_EWINGS_SARCOMA_UNSTABLE_VS_STABLE_UP		151	-0.6142396	-2.7668805	0	0	0	2539	tags=48%, list=14%, signal=56%
REACTOME_CELL_CYCLE_MITOTIC	REACTOME_CELL_CYCLE_MITOTIC		303	-0.55688196	-2.7646086	0	0	0	4197	tags=53%, list=23%, signal=69%
CHIANG_LIVER_CANCER_SUBCLASS_PROLIFERATION_UP	CHIANG_LIVER_CANCER_SUBCLASS_PROLIFERATION_UP		163	-0.6048948	-2.7634318	0	0	0	2805	tags=57%, list=16%, signal=67%
ZHOU_CELL_CYCLE_GENES_IN_IR_RESPONSE_6HR	ZHOU_CELL_CYCLE_GENES_IN_IR_RESPONSE_6HR		81	-0.6869845	-2.7634258	0	0	0	2891	tags=78%, list=16%, signal=92%
REACTOME_MITOTIC_PROMETAPHASE	REACTOME_MITOTIC_PROMETAPHASE		83	-0.645551	-2.7606888	0	0	0	3454	tags=54%, list=19%, signal=67%
SHEPARD_BMYB_TARGETS	SHEPARD_BMYB_TARGETS		65	-0.67098033	-2.7493942	0	0	0	2729	tags=57%, list=15%, signal=67%
PUJANA_BRCA_CENTERED_NETWORK	PUJANA_BRCA_CENTERED_NETWORK		117	-0.61847234	-2.7430985	0	0	0	3600	tags=62%, list=20%, signal=76%
LE_EGR2_TARGETS_UP	LE_EGR2_TARGETS_UP		102	-0.6243607	-2.726644	0	0	0	3194	tags=64%, list=18%, signal=77%
SHEDDEN_LUNG_CANCER_POOR_SURVIVAL_A6	SHEDDEN_LUNG_CANCER_POOR_SURVIVAL_A6		420	-0.5561189	-2.7197359	0	0	0	3609	tags=52%, list=20%, signal=64%
FOURNIER_ACINAR_DEVELOPMENT_LATE_2	FOURNIER_ACINAR_DEVELOPMENT_LATE_2		268	-0.5590674	-2.7188957	0	0	0	3875	tags=51%, list=21%, signal=64%
ZHOU_CELL_CYCLE_GENES_IN_IR_RESPONSE_24HR	ZHOU_CELL_CYCLE_GENES_IN_IR_RESPONSE_24HR		118	-0.62447584	-2.7184706	0	0	0	3399	tags=71%, list=19%, signal=87%
AMUNDSON_GAMMA_RADIATION_RESPONSE	AMUNDSON_GAMMA_RADIATION_RESPONSE		39	-0.76145244	-2.7147274	0	0	0	2729	tags=74%, list=15%, signal=87%
REACTOME_TRANSCRIPTION	REACTOME_TRANSCRIPTION		195	-0.5676154	-2.6912332	0	0	0	2019	tags=30%, list=11%, signal=34%
BURTON_ADIPOGENESIS_3	BURTON_ADIPOGENESIS_3		101	-0.6026295	-2.6834896	0	0	0	3582	tags=74%, list=20%, signal=92%
FARMER_BREAST_CANCER_CLUSTER_2	FARMER_BREAST_CANCER_CLUSTER_2		32	-0.7952875	-2.6832495	0	0	0	2068	tags=75%, list=11%, signal=85%
EGUCHI_CELL_CYCLE_RB1_TARGETS	EGUCHI_CELL_CYCLE_RB1_TARGETS		23	-0.84430444	-2.6741462	0	0	0	2639	tags=96%, list=15%, signal=112%
MOLENAAR_TARGETS_OF_CCND1_AND_CDK4_DN	MOLENAAR_TARGETS_OF_CCND1_AND_CDK4_DN		54	-0.71180755	-2.6715758	0	0	0	2580	tags=72%, list=14%, signal=84%
VERNELL_RETINOBLASTOMA_PATHWAY_UP	VERNELL_RETINOBLASTOMA_PATHWAY_UP		69	-0.6603537	-2.6553044	0	0	0	2639	tags=58%, list=15%, signal=68%
KAMMINGA_EZH2_TARGETS	KAMMINGA_EZH2_TARGETS		40	-0.7370065	-2.6388779	0	0	0	3499	tags=78%, list=19%, signal=96%
RHODES_UNDIFFERENTIATED_CANCER	RHODES_UNDIFFERENTIATED_CANCER		67	-0.66395414	-2.6318655	0	0	0	3481	tags=57%, list=19%, signal=70%
SARRIO_EPITHELIAL_MESENCHYMAL_TRANSITION_UP	SARRIO_EPITHELIAL_MESENCHYMAL_TRANSITION_UP		166	-0.5793549	-2.629359	0	0	0	2863	tags=58%, list=16%, signal=68%
WONG_EMBRYONIC_STEM_CELL_CORE	WONG_EMBRYONIC_STEM_CELL_CORE		329	-0.52645844	-2.6015224	0	0	0	3625	tags=42%, list=20%, signal=52%
FURUKAWA_DUSP6_TARGETS_PCI35_DN	FURUKAWA_DUSP6_TARGETS_PCI35_DN		67	-0.6444743	-2.6001809	0	0	0	2639	tags=57%, list=15%, signal=66%
PUJANA_BRCA2_PCC_NETWORK	PUJANA_BRCA2_PCC_NETWORK		392	-0.5128519	-2.5763657	0	0	0	4130	tags=54%, list=23%, signal=68%
YU_MYC_TARGETS_UP	YU_MYC_TARGETS_UP		40	-0.72607225	-2.5717685	0	0	0	3301	tags=75%, list=18%, signal=92%
GAVIN_FOXP3_TARGETS_CLUSTER_P6	GAVIN_FOXP3_TARGETS_CLUSTER_P6		78	-0.6111508	-2.5555527	0	0	0	2159	tags=63%, list=12%, signal=71%
TARTE_PLASMA_CELL_VS_PLASMABLAST_DN	TARTE_PLASMA_CELL_VS_PLASMABLAST_DN		292	-0.52485436	-2.5527172	0	0	0	4011	tags=48%, list=22%, signal=60%
DUTERTRE_ESTRADIOL_RESPONSE_24HR_UP	DUTERTRE_ESTRADIOL_RESPONSE_24HR_UP		301	-0.55197275	-2.542994	0	0	0	3257	tags=60%, list=18%, signal=73%
PUJANA_BREAST_CANCER_WITH_BRCA1_MUTATED_UP	PUJANA_BREAST_CANCER_WITH_BRCA1_MUTATED_UP		55	-0.66248053	-2.527931	0	0	0	3600	tags=65%, list=20%, signal=82%
BLUM_RESPONSE_TO_SALIRASIB_DN	BLUM_RESPONSE_TO_SALIRASIB_DN		332	-0.5156299	-2.5164661	0	0	0	3753	tags=57%, list=21%, signal=71%
REACTOME_MITOTIC_G1_G1_S_PHASES	REACTOME_MITOTIC_G1_G1_S_PHASES		129	-0.5673305	-2.5105028	0	0	0	4488	tags=60%, list=25%, signal=79%
BURTON_ADIPOGENESIS_PEAK_AT_16HR	BURTON_ADIPOGENESIS_PEAK_AT_16HR		39	-0.68794936	-2.4864013	0	0	0	3499	tags=64%, list=19%, signal=79%
LI_WILMS_TUMOR_VS_FETAL_KIDNEY_1_DN	LI_WILMS_TUMOR_VS_FETAL_KIDNEY_1_DN		157	-0.54162145	-2.4777272	0	0	0	3765	tags=52%, list=21%, signal=65%
TANG_SENESCENCE_TP53_TARGETS_DN	TANG_SENESCENCE_TP53_TARGETS_DN		51	-0.6554358	-2.474665	0	0	0	2729	tags=67%, list=15%, signal=78%
REACTOME_DNA_STRAND_ELONGATION	REACTOME_DNA_STRAND_ELONGATION		30	-0.7455653	-2.47213	0	0	0	3316	tags=73%, list=18%, signal=90%
REACTOME_S_PHASE	REACTOME_S_PHASE		105	-0.5686563	-2.4708383	0	0	0	4488	tags=57%, list=25%, signal=76%
MORI_PRE_BI_LYMPHOCYTE_UP	MORI_PRE_BI_LYMPHOCYTE_UP		73	-0.59170514	-2.420497	0	0	0	2807	tags=55%, list=16%, signal=65%
WANG_RESPONSE_TO_GSK3_INHIBITOR_SB216763_DN	WANG_RESPONSE_TO_GSK3_INHIBITOR_SB216763_DN		330	-0.49836442	-2.417369	0	0	0	2916	tags=44%, list=16%, signal=51%
FINETTI_BREAST_CANCER_KINOME_RED	FINETTI_BREAST_CANCER_KINOME_RED		16	-0.825396	-2.4141324	0	0	0	2729	tags=81%, list=15%, signal=96%
PID_PLK1_PATHWAY	PID_PLK1_PATHWAY		46	-0.64488643	-2.4092638	0	0	0	1980	tags=46%, list=11%, signal=51%
REACTOME_SYNTHESIS_OF_DNA	REACTOME_SYNTHESIS_OF_DNA		89	-0.58505356	-2.4077277	0	0	0	4488	tags=61%, list=25%, signal=80%
MITSIADES_RESPONSE_TO_APLIDIN_DN	MITSIADES_RESPONSE_TO_APLIDIN_DN		240	-0.48509952	-2.3917844	0	0	0	3277	tags=43%, list=18%, signal=52%
ODONNELL_TARGETS_OF_MYC_AND_TFRC_DN	ODONNELL_TARGETS_OF_MYC_AND_TFRC_DN		44	-0.6336005	-2.3911417	0	0	0	2849	tags=64%, list=16%, signal=75%
WU_APOPTOSIS_BY_CDKN1A_VIA_TP53	WU_APOPTOSIS_BY_CDKN1A_VIA_TP53		53	-0.6270004	-2.381064	0	0	0	3229	tags=75%, list=18%, signal=92%
REACTOME_G1_S_TRANSITION	REACTOME_G1_S_TRANSITION		106	-0.5553948	-2.362632	0	0	0	4488	tags=58%, list=25%, signal=76%
LEE_LIVER_CANCER_SURVIVAL_DN	LEE_LIVER_CANCER_SURVIVAL_DN		163	-0.5105142	-2.3569353	0	0	0	4199	tags=52%, list=23%, signal=67%
KAUFFMANN_DNA_REPLICATION_GENES	KAUFFMANN_DNA_REPLICATION_GENES		132	-0.5071315	-2.3532324	0	0	0	3316	tags=50%, list=18%, signal=61%
KORKOLA_TERATOMA	KORKOLA_TERATOMA		32	-0.6856139	-2.3492696	0	3.2150627E-5	0.001	2403	tags=59%, list=13%, signal=68%
PID_AURORA_B_PATHWAY	PID_AURORA_B_PATHWAY		39	-0.64648193	-2.344946	0	3.1819178E-5	0.001	3208	tags=64%, list=18%, signal=78%
NAKAYAMA_SOFT_TISSUE_TUMORS_PCA2_UP	NAKAYAMA_SOFT_TISSUE_TUMORS_PCA2_UP		80	-0.5567797	-2.3273664	0	3.1494492E-5	0.001	1974	tags=52%, list=11%, signal=59%
OLSSON_E2F3_TARGETS_DN	OLSSON_E2F3_TARGETS_DN		41	-0.63148963	-2.3259814	0	3.1176365E-5	0.001	2068	tags=56%, list=11%, signal=63%
KRASNOSELSKAYA_ILF3_TARGETS_UP	KRASNOSELSKAYA_ILF3_TARGETS_UP		30	-0.6804291	-2.324685	0	3.08646E-5	0.001	1567	tags=43%, list=9%, signal=47%
BIDUS_METASTASIS_UP	BIDUS_METASTASIS_UP		205	-0.48534504	-2.3189757	0	5.9512135E-5	0.002	3439	tags=45%, list=19%, signal=55%
REACTOME_M_G1_TRANSITION	REACTOME_M_G1_TRANSITION		77	-0.55627227	-2.3143382	0	5.8928683E-5	0.002	4488	tags=58%, list=25%, signal=77%
KEGG_DNA_REPLICATION	KEGG_DNA_REPLICATION		36	-0.65941507	-2.3057888	0	1.18096876E-4	0.004	3413	tags=64%, list=19%, signal=79%
AFFAR_YY1_TARGETS_DN	AFFAR_YY1_TARGETS_DN		185	-0.48062786	-2.3047693	0	1.1696133E-4	0.004	3072	tags=50%, list=17%, signal=59%
SMID_BREAST_CANCER_LUMINAL_A_DN	SMID_BREAST_CANCER_LUMINAL_A_DN		17	-0.77449155	-2.2992666	0	1.15847404E-4	0.004	1895	tags=71%, list=11%, signal=79%
FUJII_YBX1_TARGETS_DN	FUJII_YBX1_TARGETS_DN		194	-0.48800063	-2.2896297	0	1.445526E-4	0.005	2842	tags=44%, list=16%, signal=52%
VECCHI_GASTRIC_CANCER_EARLY_UP	VECCHI_GASTRIC_CANCER_EARLY_UP		362	-0.46260244	-2.2880266	0	1.4320164E-4	0.005	2897	tags=41%, list=16%, signal=48%
VANTVEER_BREAST_CANCER_METASTASIS_DN	VANTVEER_BREAST_CANCER_METASTASIS_DN		112	-0.5223236	-2.2870345	0	1.7327088E-4	0.006	2950	tags=53%, list=16%, signal=63%
OXFORD_RALA_OR_RALB_TARGETS_UP	OXFORD_RALA_OR_RALB_TARGETS_UP		48	-0.6129192	-2.286699	0	1.7168124E-4	0.006	2835	tags=54%, list=16%, signal=64%
SMIRNOV_RESPONSE_TO_IR_6HR_DN	SMIRNOV_RESPONSE_TO_IR_6HR_DN		91	-0.5433281	-2.2848988	0	1.7012049E-4	0.006	3037	tags=54%, list=17%, signal=64%
RHODES_CANCER_META_SIGNATURE	RHODES_CANCER_META_SIGNATURE		64	-0.5822613	-2.2832115	0	1.9728324E-4	0.007	3929	tags=50%, list=22%, signal=64%
WHITFIELD_CELL_CYCLE_G2	WHITFIELD_CELL_CYCLE_G2		162	-0.4999652	-2.283016	0	1.9552179E-4	0.007	3399	tags=48%, list=19%, signal=59%
FERRANDO_T_ALL_WITH_MLL_ENL_FUSION_DN	FERRANDO_T_ALL_WITH_MLL_ENL_FUSION_DN		81	-0.5431001	-2.275521	0	2.2084056E-4	0.008	4309	tags=53%, list=24%, signal=69%
REACTOME_G2_M_CHECKPOINTS	REACTOME_G2_M_CHECKPOINTS		41	-0.63693815	-2.2740123	0	2.1890337E-4	0.008	2729	tags=51%, list=15%, signal=60%
BURTON_ADIPOGENESIS_PEAK_AT_24HR	BURTON_ADIPOGENESIS_PEAK_AT_24HR		37	-0.6252293	-2.2649012	0	2.4419354E-4	0.009	3208	tags=81%, list=18%, signal=98%
REACTOME_ACTIVATION_OF_ATR_IN_RESPONSE_TO_REPLICATION_STRESS	REACTOME_ACTIVATION_OF_ATR_IN_RESPONSE_TO_REPLICATION_STRESS		35	-0.63762677	-2.2552042	0	2.4208843E-4	0.009	2647	tags=49%, list=15%, signal=57%
GOLDRATH_ANTIGEN_RESPONSE	GOLDRATH_ANTIGEN_RESPONSE		284	-0.4744792	-2.2549055	0	2.4001929E-4	0.009	3396	tags=54%, list=19%, signal=65%
FRASOR_RESPONSE_TO_SERM_OR_FULVESTRANT_DN	FRASOR_RESPONSE_TO_SERM_OR_FULVESTRANT_DN		49	-0.59187853	-2.2522526	0	2.6323547E-4	0.01	2729	tags=53%, list=15%, signal=62%
LI_WILMS_TUMOR_ANAPLASTIC_UP	LI_WILMS_TUMOR_ANAPLASTIC_UP		19	-0.7489674	-2.2501013	0	2.610234E-4	0.01	3621	tags=74%, list=20%, signal=92%
REACTOME_CHOLESTEROL_BIOSYNTHESIS	REACTOME_CHOLESTEROL_BIOSYNTHESIS		20	-0.7185212	-2.2451816	0	2.847377E-4	0.011	4071	tags=65%, list=23%, signal=84%
ACEVEDO_LIVER_CANCER_WITH_H3K9ME3_DN	ACEVEDO_LIVER_CANCER_WITH_H3K9ME3_DN		95	-0.52548116	-2.2443259	0	2.8238448E-4	0.011	1320	tags=34%, list=7%, signal=36%
SHEPARD_CRUSH_AND_BURN_MUTANT_DN	SHEPARD_CRUSH_AND_BURN_MUTANT_DN		154	-0.4972073	-2.2441304	0	2.8006983E-4	0.011	3621	tags=51%, list=20%, signal=64%
CHICAS_RB1_TARGETS_SENESCENT	CHICAS_RB1_TARGETS_SENESCENT		497	-0.44242525	-2.242866	0	3.0321785E-4	0.012	3004	tags=42%, list=17%, signal=49%
GRAHAM_CML_QUIESCENT_VS_NORMAL_QUIESCENT_UP	GRAHAM_CML_QUIESCENT_VS_NORMAL_QUIESCENT_UP		73	-0.54567784	-2.238461	0	3.0077252E-4	0.012	2439	tags=52%, list=14%, signal=60%
RHEIN_ALL_GLUCOCORTICOID_THERAPY_DN	RHEIN_ALL_GLUCOCORTICOID_THERAPY_DN		349	-0.44184414	-2.234113	0	2.9836636E-4	0.012	3331	tags=37%, list=18%, signal=44%
REACTOME_G0_AND_EARLY_G1	REACTOME_G0_AND_EARLY_G1		23	-0.6934733	-2.2268825	0	2.9599835E-4	0.012	3641	tags=65%, list=20%, signal=82%
REACTOME_CELL_CYCLE_CHECKPOINTS	REACTOME_CELL_CYCLE_CHECKPOINTS		110	-0.5129003	-2.2257457	0	3.1805004E-4	0.013	4488	tags=51%, list=25%, signal=67%
REACTOME_E2F_MEDIATED_REGULATION_OF_DNA_REPLICATION	REACTOME_E2F_MEDIATED_REGULATION_OF_DNA_REPLICATION		33	-0.64373595	-2.2234588	0	3.6455604E-4	0.015	3316	tags=61%, list=18%, signal=74%
BOYAULT_LIVER_CANCER_SUBCLASS_G3_UP	BOYAULT_LIVER_CANCER_SUBCLASS_G3_UP		182	-0.47106546	-2.216788	0	3.853478E-4	0.016	3582	tags=36%, list=20%, signal=45%
REACTOME_ACTIVATION_OF_THE_PRE_REPLICATIVE_COMPLEX	REACTOME_ACTIVATION_OF_THE_PRE_REPLICATIVE_COMPLEX		30	-0.6431095	-2.210977	0	4.0668054E-4	0.017	3413	tags=63%, list=19%, signal=78%
ABRAMSON_INTERACT_WITH_AIRE	ABRAMSON_INTERACT_WITH_AIRE		44	-0.59854555	-2.2029846	0	5.2101247E-4	0.022	3993	tags=59%, list=22%, signal=76%
REACTOME_FACTORS_INVOLVED_IN_MEGAKARYOCYTE_DEVELOPMENT_AND_PLATELET_PRODUCTION	REACTOME_FACTORS_INVOLVED_IN_MEGAKARYOCYTE_DEVELOPMENT_AND_PLATELET_PRODUCTION		105	-0.5021478	-2.193198	0	5.404859E-4	0.023	2845	tags=39%, list=16%, signal=46%
PID_FOXM1_PATHWAY	PID_FOXM1_PATHWAY		36	-0.6014508	-2.1790092	0	6.059772E-4	0.026	2189	tags=44%, list=12%, signal=50%
BOSCO_INTERFERON_INDUCED_ANTIVIRAL_MODULE	BOSCO_INTERFERON_INDUCED_ANTIVIRAL_MODULE		62	-0.533488	-2.1761653	0	6.2575686E-4	0.027	3426	tags=52%, list=19%, signal=63%
HECKER_IFNB1_TARGETS	HECKER_IFNB1_TARGETS		59	-0.55996704	-2.1737614	0	6.4271607E-4	0.028	923	tags=31%, list=5%, signal=32%
FLECHNER_BIOPSY_KIDNEY_TRANSPLANT_REJECTED_VS_OK_UP	FLECHNER_BIOPSY_KIDNEY_TRANSPLANT_REJECTED_VS_OK_UP		51	-0.5744581	-2.1713927	0	6.379902E-4	0.028	2236	tags=39%, list=12%, signal=45%
LY_AGING_OLD_DN	LY_AGING_OLD_DN		55	-0.55194145	-2.1553974	0	8.65053E-4	0.038	3442	tags=60%, list=19%, signal=74%
GREENBAUM_E2A_TARGETS_UP	GREENBAUM_E2A_TARGETS_UP		31	-0.64616466	-2.1531012	0	8.5878454E-4	0.038	2426	tags=68%, list=13%, signal=78%
POOLA_INVASIVE_BREAST_CANCER_UP	POOLA_INVASIVE_BREAST_CANCER_UP		169	-0.46703193	-2.1519825	0	8.978062E-4	0.04	2899	tags=53%, list=16%, signal=63%
SCIAN_CELL_CYCLE_TARGETS_OF_TP53_AND_TP73_DN	SCIAN_CELL_CYCLE_TARGETS_OF_TP53_AND_TP73_DN		22	-0.6900888	-2.1463253	0	9.365392E-4	0.042	2783	tags=73%, list=15%, signal=86%
DER_IFN_BETA_RESPONSE_UP	DER_IFN_BETA_RESPONSE_UP		97	-0.50955373	-2.1461556	0	9.2989707E-4	0.042	4541	tags=54%, list=25%, signal=71%
CHIARADONNA_NEOPLASTIC_TRANSFORMATION_KRAS_UP	CHIARADONNA_NEOPLASTIC_TRANSFORMATION_KRAS_UP		115	-0.49847952	-2.1457238	0	9.233484E-4	0.042	3077	tags=42%, list=17%, signal=50%
REACTOME_G1_S_SPECIFIC_TRANSCRIPTION	REACTOME_G1_S_SPECIFIC_TRANSCRIPTION		17	-0.7309916	-2.144936	0	9.168915E-4	0.042	2729	tags=76%, list=15%, signal=90%
REACTOME_LAGGING_STRAND_SYNTHESIS	REACTOME_LAGGING_STRAND_SYNTHESIS		19	-0.7123852	-2.1418457	0	9.7393995E-4	0.044	4197	tags=74%, list=23%, signal=96%
DANG_MYC_TARGETS_UP	DANG_MYC_TARGETS_UP		133	-0.47955906	-2.1231182	0	0.001165034	0.053	4532	tags=42%, list=25%, signal=56%
HU_GENOTOXIC_DAMAGE_4HR	HU_GENOTOXIC_DAMAGE_4HR		35	-0.5917918	-2.1147697	0	0.001284191	0.058	2807	tags=49%, list=16%, signal=57%
EINAV_INTERFERON_SIGNATURE_IN_CANCER	EINAV_INTERFERON_SIGNATURE_IN_CANCER		25	-0.6484945	-2.1095893	0	0.001444362	0.066	3423	tags=52%, list=19%, signal=64%
ALONSO_METASTASIS_EMT_UP	ALONSO_METASTASIS_EMT_UP		29	-0.62035584	-2.1051443	0	0.001561849	0.072	2924	tags=45%, list=16%, signal=53%
FOURNIER_ACINAR_DEVELOPMENT_LATE_DN	FOURNIER_ACINAR_DEVELOPMENT_LATE_DN		20	-0.69601554	-2.1005087	0	0.001721042	0.08	2229	tags=55%, list=12%, signal=63%
MANALO_HYPOXIA_DN	MANALO_HYPOXIA_DN		280	-0.44456947	-2.0975826	0	0.001751251	0.082	3490	tags=37%, list=19%, signal=45%
MUELLER_PLURINET	MUELLER_PLURINET		284	-0.42252055	-2.0905364	0	0.001930423	0.091	3790	tags=43%, list=21%, signal=54%
KEGG_PROTEASOME	KEGG_PROTEASOME		41	-0.5800328	-2.0886934	0	0.001938434	0.091	5245	tags=76%, list=29%, signal=106%
REACTOME_EXTENSION_OF_TELOMERES	REACTOME_EXTENSION_OF_TELOMERES		27	-0.6504913	-2.0819068	0	0.002030205	0.095	4197	tags=67%, list=23%, signal=87%
SENGUPTA_NASOPHARYNGEAL_CARCINOMA_UP	SENGUPTA_NASOPHARYNGEAL_CARCINOMA_UP		267	-0.42516488	-2.0813112	0	0.00203687	0.096	3336	tags=44%, list=18%, signal=53%
MORI_MATURE_B_LYMPHOCYTE_DN	MORI_MATURE_B_LYMPHOCYTE_DN		68	-0.5218973	-2.080998	0	0.002023729	0.096	2910	tags=44%, list=16%, signal=52%
BROWNE_INTERFERON_RESPONSIVE_GENES	BROWNE_INTERFERON_RESPONSIVE_GENES		59	-0.53922844	-2.074431	0	0.002233671	0.106	2072	tags=39%, list=11%, signal=44%
KAPOSI_LIVER_CANCER_MET_UP	KAPOSI_LIVER_CANCER_MET_UP		17	-0.704205	-2.0710893	0	0.002299125	0.11	4193	tags=71%, list=23%, signal=92%
BIOCARTA_CELLCYCLE_PATHWAY	BIOCARTA_CELLCYCLE_PATHWAY		22	-0.6723882	-2.066105	0	0.002444168	0.118	4103	tags=73%, list=23%, signal=94%
BENPORATH_ES_CORE_NINE_CORRELATED	BENPORATH_ES_CORE_NINE_CORRELATED		90	-0.48975953	-2.0659308	0	0.002428796	0.118	3051	tags=41%, list=17%, signal=49%
HAHTOLA_SEZARY_SYNDROM_UP	HAHTOLA_SEZARY_SYNDROM_UP		71	-0.51494205	-2.0637698	0	0.002475117	0.121	1837	tags=31%, list=10%, signal=34%
DER_IFN_ALPHA_RESPONSE_UP	DER_IFN_ALPHA_RESPONSE_UP		69	-0.51656216	-2.059013	0	0.002537634	0.125	4113	tags=49%, list=23%, signal=64%
PID_TOLL_ENDOGENOUS_PATHWAY	PID_TOLL_ENDOGENOUS_PATHWAY		21	-0.654199	-2.056937	0	0.002542352	0.126	1906	tags=33%, list=11%, signal=37%
MOSERLE_IFNA_RESPONSE	MOSERLE_IFNA_RESPONSE		26	-0.6312106	-2.0553837	0	0.002604721	0.129	3423	tags=65%, list=19%, signal=81%
LINDGREN_BLADDER_CANCER_CLUSTER_3_UP	LINDGREN_BLADDER_CANCER_CLUSTER_3_UP		299	-0.4178016	-2.0508265	0	0.002684903	0.134	3366	tags=43%, list=19%, signal=52%
REACTOME_ASSEMBLY_OF_THE_PRE_REPLICATIVE_COMPLEX	REACTOME_ASSEMBLY_OF_THE_PRE_REPLICATIVE_COMPLEX		62	-0.52440923	-2.0501568	0	0.002726971	0.137	5245	tags=68%, list=29%, signal=95%
REACTOME_CYCLIN_A_B1_ASSOCIATED_EVENTS_DURING_G2_M_TRANSITION	REACTOME_CYCLIN_A_B1_ASSOCIATED_EVENTS_DURING_G2_M_TRANSITION		15	-0.7085442	-2.0489626	0.006688963	0.002748514	0.139	2729	tags=53%, list=15%, signal=63%
THILLAINADESAN_ZNF217_TARGETS_UP	THILLAINADESAN_ZNF217_TARGETS_UP		43	-0.56128573	-2.0407743	0	0.003018	0.152	2970	tags=49%, list=16%, signal=58%
KEGG_HEMATOPOIETIC_CELL_LINEAGE	KEGG_HEMATOPOIETIC_CELL_LINEAGE		40	-0.5696824	-2.038559	0	0.003093421	0.155	3374	tags=60%, list=19%, signal=74%
RUIZ_TNC_TARGETS_DN	RUIZ_TNC_TARGETS_DN		136	-0.44808733	-2.036286	0	0.003112195	0.155	2729	tags=47%, list=15%, signal=55%
HORTON_SREBF_TARGETS	HORTON_SREBF_TARGETS		23	-0.65352	-2.036171	0	0.003130529	0.157	4071	tags=65%, list=23%, signal=84%
REACTOME_PROCESSIVE_SYNTHESIS_ON_THE_LAGGING_STRAND	REACTOME_PROCESSIVE_SYNTHESIS_ON_THE_LAGGING_STRAND		15	-0.6986569	-2.0229495	0.003558719	0.003695811	0.186	4197	tags=73%, list=23%, signal=95%
BENNETT_SYSTEMIC_LUPUS_ERYTHEMATOSUS	BENNETT_SYSTEMIC_LUPUS_ERYTHEMATOSUS		22	-0.65486723	-2.0222356	0.004255319	0.003728059	0.188	3446	tags=55%, list=19%, signal=67%
LY_AGING_MIDDLE_DN	LY_AGING_MIDDLE_DN		16	-0.69441783	-2.0202444	0	0.003835659	0.193	2426	tags=81%, list=13%, signal=94%
REACTOME_CYCLIN_E_ASSOCIATED_EVENTS_DURING_G1_S_TRANSITION_	REACTOME_CYCLIN_E_ASSOCIATED_EVENTS_DURING_G1_S_TRANSITION_		62	-0.5107561	-2.0175056	0	0.003941323	0.198	5245	tags=63%, list=29%, signal=88%
PELLICCIOTTA_HDAC_IN_ANTIGEN_PRESENTATION_DN	PELLICCIOTTA_HDAC_IN_ANTIGEN_PRESENTATION_DN		49	-0.531517	-2.0173535	0	0.003918801	0.198	4142	tags=53%, list=23%, signal=69%
BIOCARTA_PROTEASOME_PATHWAY	BIOCARTA_PROTEASOME_PATHWAY		28	-0.6078427	-2.014777	0	0.004037875	0.206	5396	tags=71%, list=30%, signal=102%
REACTOME_SCFSKP2_MEDIATED_DEGRADATION_OF_P27_P21	REACTOME_SCFSKP2_MEDIATED_DEGRADATION_OF_P27_P21		53	-0.52476496	-2.0138383	0	0.004015063	0.206	5245	tags=68%, list=29%, signal=95%
WEST_ADRENOCORTICAL_TUMOR_MARKERS_UP	WEST_ADRENOCORTICAL_TUMOR_MARKERS_UP		21	-0.6725371	-2.0109522	0	0.00413643	0.213	2899	tags=62%, list=16%, signal=74%
WHITFIELD_CELL_CYCLE_G2_M	WHITFIELD_CELL_CYCLE_G2_M		195	-0.42442346	-2.0101395	0	0.004130152	0.214	2410	tags=34%, list=13%, signal=39%
GARGALOVIC_RESPONSE_TO_OXIDIZED_PHOSPHOLIPIDS_TURQUOISE_DN	GARGALOVIC_RESPONSE_TO_OXIDIZED_PHOSPHOLIPIDS_TURQUOISE_DN		51	-0.51274234	-2.0000014	0	0.004675783	0.242	1980	tags=41%, list=11%, signal=46%
LI_WILMS_TUMOR_VS_FETAL_KIDNEY_2_UP	LI_WILMS_TUMOR_VS_FETAL_KIDNEY_2_UP		26	-0.6227805	-1.9936948	0	0.004947375	0.255	2835	tags=62%, list=16%, signal=73%
REACTOME_ORC1_REMOVAL_FROM_CHROMATIN	REACTOME_ORC1_REMOVAL_FROM_CHROMATIN		64	-0.51332235	-1.9867247	0	0.005425928	0.274	4488	tags=53%, list=25%, signal=70%
FERRANDO_HOX11_NEIGHBORS	FERRANDO_HOX11_NEIGHBORS		16	-0.68097126	-1.98079	0	0.005881978	0.294	2639	tags=50%, list=15%, signal=59%
BIOCARTA_P53_PATHWAY	BIOCARTA_P53_PATHWAY		16	-0.6819097	-1.9805717	0	0.005850011	0.294	3301	tags=56%, list=18%, signal=69%
BASAKI_YBX1_TARGETS_UP	BASAKI_YBX1_TARGETS_UP		266	-0.40369502	-1.9795499	0	0.005905816	0.298	2867	tags=40%, list=16%, signal=47%
REACTOME_APOPTOTIC_EXECUTION_PHASE	REACTOME_APOPTOTIC_EXECUTION_PHASE		46	-0.5141354	-1.9743583	0	0.006350378	0.319	3068	tags=41%, list=17%, signal=50%
UDAYAKUMAR_MED1_TARGETS_UP	UDAYAKUMAR_MED1_TARGETS_UP		131	-0.458957	-1.972866	0	0.006402523	0.321	3085	tags=37%, list=17%, signal=45%
REACTOME_CDK_MEDIATED_PHOSPHORYLATION_AND_REMOVAL_OF_CDC6	REACTOME_CDK_MEDIATED_PHOSPHORYLATION_AND_REMOVAL_OF_CDC6		45	-0.52451485	-1.9713764	0	0.006385879	0.322	5245	tags=69%, list=29%, signal=97%
PUJANA_BREAST_CANCER_LIT_INT_NETWORK	PUJANA_BREAST_CANCER_LIT_INT_NETWORK		98	-0.45685378	-1.9683126	0	0.006587124	0.33	2807	tags=37%, list=16%, signal=43%
WORSCHECH_TUMOR_REJECTION_UP	WORSCHECH_TUMOR_REJECTION_UP		28	-0.5744797	-1.9637619	0.00409836	0.006915357	0.346	996	tags=39%, list=6%, signal=42%
REACTOME_GENERATION_OF_SECOND_MESSENGER_MOLECULES	REACTOME_GENERATION_OF_SECOND_MESSENGER_MOLECULES		15	-0.6985271	-1.9624742	0	0.006980292	0.35	1575	tags=27%, list=9%, signal=29%
XU_RESPONSE_TO_TRETINOIN_AND_NSC682994_DN	XU_RESPONSE_TO_TRETINOIN_AND_NSC682994_DN		15	-0.6989389	-1.9585127	0	0.007159426	0.361	3779	tags=60%, list=21%, signal=76%
REACTOME_INTERFERON_ALPHA_BETA_SIGNALING	REACTOME_INTERFERON_ALPHA_BETA_SIGNALING		44	-0.53356665	-1.9515213	0	0.007768129	0.389	2197	tags=39%, list=12%, signal=44%
PID_E2F_PATHWAY	PID_E2F_PATHWAY		70	-0.49189675	-1.9490187	0	0.007939202	0.398	2755	tags=41%, list=15%, signal=49%
NAKAMURA_METASTASIS_MODEL_DN	NAKAMURA_METASTASIS_MODEL_DN		35	-0.5393	-1.9469572	0	0.008191684	0.408	1748	tags=37%, list=10%, signal=41%
REACTOME_REGULATION_OF_MITOTIC_CELL_CYCLE	REACTOME_REGULATION_OF_MITOTIC_CELL_CYCLE		76	-0.47803125	-1.945379	0	0.00833226	0.416	4488	tags=50%, list=25%, signal=66%
HASLINGER_B_CLL_WITH_6Q21_DELETION	HASLINGER_B_CLL_WITH_6Q21_DELETION		18	-0.63488007	-1.9312075	0	0.009668688	0.471	1009	tags=44%, list=6%, signal=47%
REACTOME_VIF_MEDIATED_DEGRADATION_OF_APOBEC3G	REACTOME_VIF_MEDIATED_DEGRADATION_OF_APOBEC3G		48	-0.5159907	-1.93008	0	0.009718199	0.475	5245	tags=67%, list=29%, signal=94%
PETROVA_ENDOTHELIUM_LYMPHATIC_VS_BLOOD_UP	PETROVA_ENDOTHELIUM_LYMPHATIC_VS_BLOOD_UP		114	-0.45227104	-1.9299526	0	0.009685183	0.475	2782	tags=50%, list=15%, signal=59%
REACTOME_CROSS_PRESENTATION_OF_SOLUBLE_EXOGENOUS_ANTIGENS_ENDOSOMES	REACTOME_CROSS_PRESENTATION_OF_SOLUBLE_EXOGENOUS_ANTIGENS_ENDOSOMES		43	-0.5259633	-1.9296767	0	0.009684498	0.478	5245	tags=72%, list=29%, signal=101%
BHATTACHARYA_EMBRYONIC_STEM_CELL	BHATTACHARYA_EMBRYONIC_STEM_CELL		75	-0.46814546	-1.9287221	0	0.009651281	0.478	3810	tags=45%, list=21%, signal=57%
JAEGER_METASTASIS_UP	JAEGER_METASTASIS_UP		40	-0.5362026	-1.9281801	0	0.009634241	0.48	1887	tags=40%, list=10%, signal=45%
SHETH_LIVER_CANCER_VS_TXNIP_LOSS_PAM3	SHETH_LIVER_CANCER_VS_TXNIP_LOSS_PAM3		51	-0.5087219	-1.921982	0	0.010184784	0.494	1822	tags=35%, list=10%, signal=39%
AMIT_EGF_RESPONSE_480_MCF10A	AMIT_EGF_RESPONSE_480_MCF10A		41	-0.52733403	-1.9208465	0	0.010242179	0.497	2570	tags=41%, list=14%, signal=48%
CROONQUIST_NRAS_VS_STROMAL_STIMULATION_DN	CROONQUIST_NRAS_VS_STROMAL_STIMULATION_DN		93	-0.45305526	-1.9156716	0	0.010918442	0.524	2465	tags=51%, list=14%, signal=58%
BENPORATH_ES_1	BENPORATH_ES_1		329	-0.37766626	-1.9144055	0	0.010956241	0.528	2832	tags=34%, list=16%, signal=40%
ACEVEDO_LIVER_CANCER_WITH_H3K27ME3_DN	ACEVEDO_LIVER_CANCER_WITH_H3K27ME3_DN		162	-0.41807863	-1.9136691	0	0.010949666	0.529	1812	tags=35%, list=10%, signal=39%
REACTOME_P53_DEPENDENT_G1_DNA_DAMAGE_RESPONSE	REACTOME_P53_DEPENDENT_G1_DNA_DAMAGE_RESPONSE		52	-0.512044	-1.9116904	0	0.011065469	0.535	5245	tags=65%, list=29%, signal=92%
REACTOME_SCF_BETA_TRCP_MEDIATED_DEGRADATION_OF_EMI1	REACTOME_SCF_BETA_TRCP_MEDIATED_DEGRADATION_OF_EMI1		48	-0.5064847	-1.9053533	0	0.011683336	0.551	5245	tags=69%, list=29%, signal=97%
JEON_SMAD6_TARGETS_DN	JEON_SMAD6_TARGETS_DN		18	-0.63726395	-1.9044833	0.007142857	0.011795228	0.555	1763	tags=50%, list=10%, signal=55%
PEART_HDAC_PROLIFERATION_CLUSTER_DN	PEART_HDAC_PROLIFERATION_CLUSTER_DN		67	-0.4698809	-1.9035432	0	0.011827571	0.556	2815	tags=39%, list=16%, signal=46%
REACTOME_CDT1_ASSOCIATION_WITH_THE_CDC6_ORC_ORIGIN_COMPLEX	REACTOME_CDT1_ASSOCIATION_WITH_THE_CDC6_ORC_ORIGIN_COMPLEX		53	-0.48713875	-1.9022745	0	0.011983077	0.564	5245	tags=64%, list=29%, signal=90%
WANG_CISPLATIN_RESPONSE_AND_XPC_UP	WANG_CISPLATIN_RESPONSE_AND_XPC_UP		164	-0.40625304	-1.9019262	0	0.011957387	0.565	3120	tags=40%, list=17%, signal=48%
REACTOME_MITOTIC_G2_G2_M_PHASES	REACTOME_MITOTIC_G2_G2_M_PHASES		78	-0.47516912	-1.9015623	0	0.011946516	0.566	3917	tags=44%, list=22%, signal=55%
HUANG_DASATINIB_RESISTANCE_UP	HUANG_DASATINIB_RESISTANCE_UP		77	-0.46407452	-1.8995103	0	0.01209649	0.573	2884	tags=38%, list=16%, signal=45%
HOELZEL_NF1_TARGETS_UP	HOELZEL_NF1_TARGETS_UP		130	-0.429423	-1.897973	0	0.012158788	0.577	1757	tags=31%, list=10%, signal=34%
GEORGES_CELL_CYCLE_MIR192_TARGETS	GEORGES_CELL_CYCLE_MIR192_TARGETS		61	-0.4778613	-1.8967385	0	0.012263428	0.58	4305	tags=54%, list=24%, signal=71%
FARMER_BREAST_CANCER_CLUSTER_1	FARMER_BREAST_CANCER_CLUSTER_1		17	-0.6489482	-1.8936231	0.010416667	0.012617959	0.594	1567	tags=47%, list=9%, signal=51%
SHEPARD_BMYB_MORPHOLINO_DN	SHEPARD_BMYB_MORPHOLINO_DN		161	-0.40896443	-1.8849604	0	0.013548216	0.628	3061	tags=47%, list=17%, signal=56%
HOLLEMAN_PREDNISOLONE_RESISTANCE_B_ALL_UP	HOLLEMAN_PREDNISOLONE_RESISTANCE_B_ALL_UP		22	-0.6138921	-1.8826675	0	0.01375986	0.635	4091	tags=55%, list=23%, signal=70%
UROSEVIC_RESPONSE_TO_IMIQUIMOD	UROSEVIC_RESPONSE_TO_IMIQUIMOD		17	-0.6435882	-1.8820022	0	0.013783885	0.637	1100	tags=47%, list=6%, signal=50%
YU_BAP1_TARGETS	YU_BAP1_TARGETS		26	-0.57860273	-1.8717358	0	0.014963295	0.668	3994	tags=62%, list=22%, signal=79%
ZHENG_GLIOBLASTOMA_PLASTICITY_UP	ZHENG_GLIOBLASTOMA_PLASTICITY_UP		217	-0.38436496	-1.868912	0	0.015409311	0.68	3256	tags=55%, list=18%, signal=66%
REACTOME_P53_INDEPENDENT_G1_S_DNA_DAMAGE_CHECKPOINT	REACTOME_P53_INDEPENDENT_G1_S_DNA_DAMAGE_CHECKPOINT		47	-0.49111605	-1.8666402	0	0.015622516	0.685	5245	tags=66%, list=29%, signal=93%
REACTOME_G1_PHASE	REACTOME_G1_PHASE		34	-0.54142857	-1.8656509	0	0.01573623	0.689	4849	tags=62%, list=27%, signal=84%
WANG_METASTASIS_OF_BREAST_CANCER_ESR1_UP	WANG_METASTASIS_OF_BREAST_CANCER_ESR1_UP		21	-0.6220175	-1.8628776	0	0.016157808	0.698	2807	tags=52%, list=16%, signal=62%
CHIARETTI_T_ALL_RELAPSE_PROGNOSIS	CHIARETTI_T_ALL_RELAPSE_PROGNOSIS		16	-0.66218716	-1.860645	0.00390625	0.016424248	0.707	2654	tags=75%, list=15%, signal=88%
PID_FANCONI_PATHWAY	PID_FANCONI_PATHWAY		47	-0.48943108	-1.8597429	0	0.016493836	0.708	2603	tags=43%, list=14%, signal=50%
ALCALAY_AML_BY_NPM1_LOCALIZATION_DN	ALCALAY_AML_BY_NPM1_LOCALIZATION_DN		159	-0.41541097	-1.8579974	0	0.016599763	0.712	2295	tags=38%, list=13%, signal=44%
NUTT_GBM_VS_AO_GLIOMA_UP	NUTT_GBM_VS_AO_GLIOMA_UP		43	-0.49626118	-1.8569493	0	0.016597096	0.713	2332	tags=28%, list=13%, signal=32%
CHARAFE_BREAST_CANCER_LUMINAL_VS_BASAL_DN	CHARAFE_BREAST_CANCER_LUMINAL_VS_BASAL_DN		388	-0.36428222	-1.8547353	0	0.016882032	0.721	3077	tags=35%, list=17%, signal=41%
MURAKAMI_UV_RESPONSE_6HR_UP	MURAKAMI_UV_RESPONSE_6HR_UP		32	-0.5248811	-1.8538636	0	0.017029634	0.729	3535	tags=44%, list=20%, signal=54%
ZHANG_INTERFERON_RESPONSE	ZHANG_INTERFERON_RESPONSE		20	-0.59818846	-1.8526231	0.013043478	0.017147256	0.731	1100	tags=35%, list=6%, signal=37%
CONCANNON_APOPTOSIS_BY_EPOXOMICIN_DN	CONCANNON_APOPTOSIS_BY_EPOXOMICIN_DN		161	-0.4000673	-1.8502536	0	0.017507996	0.738	2890	tags=41%, list=16%, signal=48%
ENK_UV_RESPONSE_EPIDERMIS_UP	ENK_UV_RESPONSE_EPIDERMIS_UP		251	-0.37029666	-1.8477278	0	0.017828528	0.753	3605	tags=39%, list=20%, signal=48%
REACTOME_APC_C_CDC20_MEDIATED_DEGRADATION_OF_MITOTIC_PROTEINS	REACTOME_APC_C_CDC20_MEDIATED_DEGRADATION_OF_MITOTIC_PROTEINS		64	-0.4647021	-1.8468287	0	0.017836278	0.754	5245	tags=61%, list=29%, signal=86%
JI_RESPONSE_TO_FSH_UP	JI_RESPONSE_TO_FSH_UP		69	-0.46483445	-1.8465371	0	0.017813914	0.754	3928	tags=52%, list=22%, signal=66%
SESTO_RESPONSE_TO_UV_C7	SESTO_RESPONSE_TO_UV_C7		63	-0.473122	-1.8435534	0	0.01823176	0.759	2746	tags=38%, list=15%, signal=45%
MILI_PSEUDOPODIA_HAPTOTAXIS_UP	MILI_PSEUDOPODIA_HAPTOTAXIS_UP		499	-0.40279078	-1.8406284	0	0.018504709	0.769	4119	tags=39%, list=23%, signal=49%
KEGG_MISMATCH_REPAIR	KEGG_MISMATCH_REPAIR		23	-0.5808739	-1.8396226	0	0.018612988	0.771	3301	tags=52%, list=18%, signal=64%
LY_AGING_PREMATURE_DN	LY_AGING_PREMATURE_DN		29	-0.53571707	-1.8365383	0.004273505	0.018987745	0.781	3095	tags=55%, list=17%, signal=66%
YIH_RESPONSE_TO_ARSENITE_C3	YIH_RESPONSE_TO_ARSENITE_C3		35	-0.52263576	-1.8358861	0.004830918	0.019028366	0.781	1583	tags=37%, list=9%, signal=41%
SUNG_METASTASIS_STROMA_DN	SUNG_METASTASIS_STROMA_DN		46	-0.48535526	-1.8356127	0	0.01900392	0.784	3301	tags=48%, list=18%, signal=58%
REACTOME_APC_C_CDH1_MEDIATED_DEGRADATION_OF_CDC20_AND_OTHER_APC_C_CDH1_TARGETED_PROTEINS_IN_LATE_MITOSIS_EARLY_G1	REACTOME_APC_C_CDH1_MEDIATED_DEGRADATION_OF_CDC20_AND_OTHER_APC_C_CDH1_TARGETED_PROTEINS_IN_LATE_MITOSIS_EARLY_G1		63	-0.4544591	-1.8334005	0	0.01919941	0.787	5245	tags=59%, list=29%, signal=83%
KEGG_CELL_CYCLE	KEGG_CELL_CYCLE		120	-0.41271296	-1.8320448	0	0.019262342	0.789	2738	tags=38%, list=15%, signal=45%
SANSOM_APC_TARGETS_UP	SANSOM_APC_TARGETS_UP		102	-0.44092137	-1.8319334	0	0.019197896	0.789	2347	tags=30%, list=13%, signal=35%
BIOCARTA_MCM_PATHWAY	BIOCARTA_MCM_PATHWAY		18	-0.6152651	-1.8293779	0	0.019454045	0.789	3192	tags=61%, list=18%, signal=74%
SCIBETTA_KDM5B_TARGETS_DN	SCIBETTA_KDM5B_TARGETS_DN		75	-0.44385144	-1.8288821	0	0.01945399	0.791	3178	tags=48%, list=18%, signal=58%
REACTOME_INTERFERON_SIGNALING	REACTOME_INTERFERON_SIGNALING		126	-0.40858966	-1.8284909	0	0.019477265	0.791	3423	tags=39%, list=19%, signal=48%
LE_NEURONAL_DIFFERENTIATION_DN	LE_NEURONAL_DIFFERENTIATION_DN		19	-0.5959391	-1.8269898	0.003690037	0.019640872	0.794	1895	tags=47%, list=11%, signal=53%
HEIDENBLAD_AMPLICON_12P11_12_UP	HEIDENBLAD_AMPLICON_12P11_12_UP		31	-0.53515565	-1.8240271	0.004807693	0.020093828	0.799	2780	tags=42%, list=15%, signal=49%
WHITFIELD_CELL_CYCLE_S	WHITFIELD_CELL_CYCLE_S		151	-0.40998653	-1.821282	0	0.0205713	0.808	2314	tags=34%, list=13%, signal=38%
BROWNE_HCMV_INFECTION_2HR_DN	BROWNE_HCMV_INFECTION_2HR_DN		47	-0.47386914	-1.8086847	0	0.022728464	0.834	2626	tags=40%, list=15%, signal=47%
VERRECCHIA_DELAYED_RESPONSE_TO_TGFB1	VERRECCHIA_DELAYED_RESPONSE_TO_TGFB1		36	-0.5021852	-1.8074312	0.005128205	0.022866417	0.836	1112	tags=22%, list=6%, signal=24%
MILI_PSEUDOPODIA_CHEMOTAXIS_UP	MILI_PSEUDOPODIA_CHEMOTAXIS_UP		68	-0.45227993	-1.8073504	0	0.022776747	0.836	2412	tags=34%, list=13%, signal=39%
CAIRO_PML_TARGETS_BOUND_BY_MYC_UP	CAIRO_PML_TARGETS_BOUND_BY_MYC_UP		22	-0.56883025	-1.8073078	0	0.022711856	0.836	4103	tags=59%, list=23%, signal=76%
REACTOME_ANTIGEN_PROCESSING_CROSS_PRESENTATION	REACTOME_ANTIGEN_PROCESSING_CROSS_PRESENTATION		66	-0.44914225	-1.8072495	0	0.022636514	0.836	5245	tags=61%, list=29%, signal=85%
WONG_PROTEASOME_GENE_MODULE	WONG_PROTEASOME_GENE_MODULE		49	-0.48251906	-1.8053178	0	0.022856114	0.837	4488	tags=53%, list=25%, signal=70%
WILCOX_RESPONSE_TO_PROGESTERONE_UP	WILCOX_RESPONSE_TO_PROGESTERONE_UP		132	-0.4083584	-1.804748	0	0.022903547	0.84	3107	tags=44%, list=17%, signal=53%
CHICAS_RB1_TARGETS_GROWING	CHICAS_RB1_TARGETS_GROWING		230	-0.37477493	-1.8040353	0	0.022887805	0.842	2919	tags=47%, list=16%, signal=56%
VERHAAK_AML_WITH_NPM1_MUTATED_DN	VERHAAK_AML_WITH_NPM1_MUTATED_DN		184	-0.40309718	-1.8012301	0	0.023253066	0.845	1870	tags=27%, list=10%, signal=30%
MAGRANGEAS_MULTIPLE_MYELOMA_IGLL_VS_IGLK_UP	MAGRANGEAS_MULTIPLE_MYELOMA_IGLL_VS_IGLK_UP		34	-0.5084781	-1.7996079	0	0.023444118	0.849	1716	tags=26%, list=10%, signal=29%
VANTVEER_BREAST_CANCER_POOR_PROGNOSIS	VANTVEER_BREAST_CANCER_POOR_PROGNOSIS		46	-0.48248997	-1.7954935	0	0.024175407	0.856	2946	tags=43%, list=16%, signal=52%
REACTOME_LOSS_OF_NLP_FROM_MITOTIC_CENTROSOMES	REACTOME_LOSS_OF_NLP_FROM_MITOTIC_CENTROSOMES		56	-0.45900637	-1.793276	0	0.024483485	0.86	3812	tags=45%, list=21%, signal=56%
REACTOME_PREFOLDIN_MEDIATED_TRANSFER_OF_SUBSTRATE_TO_CCT_TRIC	REACTOME_PREFOLDIN_MEDIATED_TRANSFER_OF_SUBSTRATE_TO_CCT_TRIC		24	-0.5562285	-1.7928579	0.008333334	0.024438998	0.861	5049	tags=58%, list=28%, signal=81%
SHIPP_DLBCL_VS_FOLLICULAR_LYMPHOMA_UP	SHIPP_DLBCL_VS_FOLLICULAR_LYMPHOMA_UP		42	-0.49496022	-1.7926178	0	0.024442026	0.861	4050	tags=60%, list=22%, signal=77%
MORI_SMALL_PRE_BII_LYMPHOCYTE_DN	MORI_SMALL_PRE_BII_LYMPHOCYTE_DN		69	-0.44638672	-1.7883532	0	0.025191145	0.868	1967	tags=32%, list=11%, signal=36%
SEITZ_NEOPLASTIC_TRANSFORMATION_BY_8P_DELETION_DN	SEITZ_NEOPLASTIC_TRANSFORMATION_BY_8P_DELETION_DN		27	-0.53836006	-1.787891	0	0.025181027	0.869	2994	tags=44%, list=17%, signal=53%
SANA_RESPONSE_TO_IFNG_UP	SANA_RESPONSE_TO_IFNG_UP		58	-0.46237028	-1.7855242	0	0.025539728	0.874	2527	tags=40%, list=14%, signal=46%
BOHN_PRIMARY_IMMUNODEFICIENCY_SYNDROM_UP	BOHN_PRIMARY_IMMUNODEFICIENCY_SYNDROM_UP		44	-0.49092108	-1.7852682	0	0.025469175	0.876	3230	tags=48%, list=18%, signal=58%
WEST_ADRENOCORTICAL_TUMOR_UP	WEST_ADRENOCORTICAL_TUMOR_UP		280	-0.3618454	-1.7846276	0	0.025540827	0.88	3884	tags=38%, list=22%, signal=47%
SIMBULAN_UV_RESPONSE_IMMORTALIZED_DN	SIMBULAN_UV_RESPONSE_IMMORTALIZED_DN		29	-0.5323326	-1.7840837	0.004587156	0.025643157	0.882	1010	tags=21%, list=6%, signal=22%
IWANAGA_E2F1_TARGETS_INDUCED_BY_SERUM	IWANAGA_E2F1_TARGETS_INDUCED_BY_SERUM		30	-0.5204676	-1.7825474	0	0.025922881	0.887	2045	tags=43%, list=11%, signal=49%
BORCZUK_MALIGNANT_MESOTHELIOMA_UP	BORCZUK_MALIGNANT_MESOTHELIOMA_UP		296	-0.36362705	-1.7824355	0	0.025863217	0.887	4196	tags=38%, list=23%, signal=48%
GROSS_HIF1A_TARGETS_DN	GROSS_HIF1A_TARGETS_DN		22	-0.5726818	-1.781584	0.003952569	0.025979398	0.889	2855	tags=41%, list=16%, signal=49%
LINDGREN_BLADDER_CANCER_CLUSTER_1_DN	LINDGREN_BLADDER_CANCER_CLUSTER_1_DN		331	-0.36047193	-1.781466	0	0.025920745	0.89	2849	tags=37%, list=16%, signal=43%
REACTOME_FORMATION_OF_TUBULIN_FOLDING_INTERMEDIATES_BY_CCT_TRIC	REACTOME_FORMATION_OF_TUBULIN_FOLDING_INTERMEDIATES_BY_CCT_TRIC		18	-0.5912653	-1.7808948	0.010830325	0.025905965	0.89	5049	tags=61%, list=28%, signal=85%
BIOCARTA_RACCYCD_PATHWAY	BIOCARTA_RACCYCD_PATHWAY		26	-0.54466295	-1.7799687	0	0.026075536	0.892	3012	tags=38%, list=17%, signal=46%
PID_ATR_PATHWAY	PID_ATR_PATHWAY		39	-0.503829	-1.7779866	0	0.026473716	0.897	2727	tags=44%, list=15%, signal=51%
STEIN_ESRRA_TARGETS_RESPONSIVE_TO_ESTROGEN_DN	STEIN_ESRRA_TARGETS_RESPONSIVE_TO_ESTROGEN_DN		40	-0.49536216	-1.7749324	0	0.027084043	0.902	2403	tags=55%, list=13%, signal=63%
REACTOME_KINESINS	REACTOME_KINESINS		22	-0.5654242	-1.7742662	0.012345679	0.027089914	0.902	4111	tags=73%, list=23%, signal=94%
DE_YY1_TARGETS_DN	DE_YY1_TARGETS_DN		89	-0.4158025	-1.7665468	0	0.028791517	0.918	3454	tags=39%, list=19%, signal=48%
SESTO_RESPONSE_TO_UV_C4	SESTO_RESPONSE_TO_UV_C4		17	-0.611641	-1.7618945	0.003521127	0.029900612	0.928	3075	tags=41%, list=17%, signal=50%
YAO_TEMPORAL_RESPONSE_TO_PROGESTERONE_CLUSTER_12	YAO_TEMPORAL_RESPONSE_TO_PROGESTERONE_CLUSTER_12		71	-0.43511754	-1.7601256	0	0.030133361	0.928	3003	tags=32%, list=17%, signal=39%
NADERI_BREAST_CANCER_PROGNOSIS_UP	NADERI_BREAST_CANCER_PROGNOSIS_UP		42	-0.46843958	-1.7597353	0.005494506	0.030106459	0.928	3208	tags=45%, list=18%, signal=55%
PAL_PRMT5_TARGETS_UP	PAL_PRMT5_TARGETS_UP		197	-0.3768042	-1.7575426	0	0.030550664	0.932	3481	tags=39%, list=19%, signal=47%
HERNANDEZ_MITOTIC_ARREST_BY_DOCETAXEL_2_UP	HERNANDEZ_MITOTIC_ARREST_BY_DOCETAXEL_2_UP		51	-0.45922795	-1.7575015	0	0.03046634	0.933	3729	tags=59%, list=21%, signal=74%
KIM_WT1_TARGETS_8HR_UP	KIM_WT1_TARGETS_8HR_UP		155	-0.37601283	-1.7574668	0	0.03037103	0.933	2531	tags=30%, list=14%, signal=35%
DELACROIX_RAR_TARGETS_DN	DELACROIX_RAR_TARGETS_DN		20	-0.5677534	-1.7565092	0.008130081	0.03057322	0.935	1493	tags=40%, list=8%, signal=44%
ZHANG_RESPONSE_TO_CANTHARIDIN_UP	ZHANG_RESPONSE_TO_CANTHARIDIN_UP		17	-0.59885156	-1.7564292	0.011538462	0.030501196	0.935	346	tags=18%, list=2%, signal=18%
PYEON_CANCER_HEAD_AND_NECK_VS_CERVICAL_UP	PYEON_CANCER_HEAD_AND_NECK_VS_CERVICAL_UP		173	-0.38751867	-1.7508572	0	0.031794477	0.942	2941	tags=39%, list=16%, signal=46%
GAL_LEUKEMIC_STEM_CELL_DN	GAL_LEUKEMIC_STEM_CELL_DN		166	-0.3886326	-1.7480837	0	0.03252107	0.945	2266	tags=36%, list=13%, signal=41%
SENESE_HDAC1_AND_HDAC2_TARGETS_UP	SENESE_HDAC1_AND_HDAC2_TARGETS_UP		197	-0.3667169	-1.7430621	0	0.033791132	0.954	1670	tags=24%, list=9%, signal=26%
TAVOR_CEBPA_TARGETS_DN	TAVOR_CEBPA_TARGETS_DN		24	-0.5428478	-1.7390811	0.003731343	0.034620997	0.956	1209	tags=25%, list=7%, signal=27%
RIZ_ERYTHROID_DIFFERENTIATION	RIZ_ERYTHROID_DIFFERENTIATION		70	-0.42542863	-1.738264	0	0.03466469	0.957	3911	tags=44%, list=22%, signal=56%
REACTOME_DESTABILIZATION_OF_MRNA_BY_AUF1_HNRNP_D0	REACTOME_DESTABILIZATION_OF_MRNA_BY_AUF1_HNRNP_D0		49	-0.45573	-1.7377467	0.006134969	0.034676462	0.958	5269	tags=65%, list=29%, signal=92%
YAMAZAKI_TCEB3_TARGETS_DN	YAMAZAKI_TCEB3_TARGETS_DN		193	-0.38284323	-1.7374572	0	0.034624536	0.958	3014	tags=37%, list=17%, signal=44%
MORI_EMU_MYC_LYMPHOMA_BY_ONSET_TIME_UP	MORI_EMU_MYC_LYMPHOMA_BY_ONSET_TIME_UP		103	-0.39717233	-1.7348014	0	0.03519245	0.961	3929	tags=47%, list=22%, signal=59%
PID_BARD1_PATHWAY	PID_BARD1_PATHWAY		29	-0.51224387	-1.734244	0.014018691	0.0352008	0.961	3875	tags=52%, list=21%, signal=66%
REACTOME_SIGNALLING_TO_RAS	REACTOME_SIGNALLING_TO_RAS		26	-0.5360968	-1.7341026	0.021186441	0.03510503	0.961	3012	tags=42%, list=17%, signal=51%
MORI_PLASMA_CELL_DN	MORI_PLASMA_CELL_DN		25	-0.53802335	-1.7302163	0.011952192	0.036292594	0.965	1901	tags=32%, list=11%, signal=36%
CHANG_CORE_SERUM_RESPONSE_UP	CHANG_CORE_SERUM_RESPONSE_UP		204	-0.3644862	-1.7287276	0	0.03660409	0.966	3856	tags=41%, list=21%, signal=52%
PETROVA_PROX1_TARGETS_UP	PETROVA_PROX1_TARGETS_UP		25	-0.5396333	-1.7287233	0	0.036483284	0.966	2729	tags=68%, list=15%, signal=80%
TOYOTA_TARGETS_OF_MIR34B_AND_MIR34C	TOYOTA_TARGETS_OF_MIR34B_AND_MIR34C		420	-0.36061987	-1.7280233	0	0.036553066	0.967	3420	tags=38%, list=19%, signal=46%
ROSS_AML_WITH_AML1_ETO_FUSION	ROSS_AML_WITH_AML1_ETO_FUSION		66	-0.44217202	-1.7235268	0	0.037943542	0.972	1864	tags=32%, list=10%, signal=35%
REACTOME_RECRUITMENT_OF_MITOTIC_CENTROSOME_PROTEINS_AND_COMPLEXES	REACTOME_RECRUITMENT_OF_MITOTIC_CENTROSOME_PROTEINS_AND_COMPLEXES		63	-0.43112922	-1.7226194	0	0.03811787	0.972	3812	tags=41%, list=21%, signal=52%
AIYAR_COBRA1_TARGETS_DN	AIYAR_COBRA1_TARGETS_DN		27	-0.5207874	-1.7216738	0.004115226	0.038241584	0.972	3769	tags=41%, list=21%, signal=51%
SMID_BREAST_CANCER_RELAPSE_IN_BRAIN_UP	SMID_BREAST_CANCER_RELAPSE_IN_BRAIN_UP		30	-0.50461096	-1.721207	0.004464286	0.03826181	0.972	1668	tags=33%, list=9%, signal=37%
CHARAFE_BREAST_CANCER_LUMINAL_VS_MESENCHYMAL_DN	CHARAFE_BREAST_CANCER_LUMINAL_VS_MESENCHYMAL_DN		436	-0.32919708	-1.720709	0	0.038251042	0.973	2961	tags=36%, list=16%, signal=42%
PID_P38_MK2_PATHWAY	PID_P38_MK2_PATHWAY		20	-0.56947553	-1.7195505	0.011764706	0.03852563	0.975	4308	tags=45%, list=24%, signal=59%
SUZUKI_RESPONSE_TO_TSA	SUZUKI_RESPONSE_TO_TSA		16	-0.59369516	-1.7191725	0.018181818	0.038585152	0.975	2577	tags=38%, list=14%, signal=44%
BERTUCCI_MEDULLARY_VS_DUCTAL_BREAST_CANCER_UP	BERTUCCI_MEDULLARY_VS_DUCTAL_BREAST_CANCER_UP		176	-0.3675584	-1.7181827	0	0.038735867	0.976	3668	tags=36%, list=20%, signal=45%
SHIN_B_CELL_LYMPHOMA_CLUSTER_7	SHIN_B_CELL_LYMPHOMA_CLUSTER_7		26	-0.514705	-1.7162812	0.0041841	0.03931396	0.978	3929	tags=54%, list=22%, signal=69%
REACTOME_AUTODEGRADATION_OF_THE_E3_UBIQUITIN_LIGASE_COP1	REACTOME_AUTODEGRADATION_OF_THE_E3_UBIQUITIN_LIGASE_COP1		46	-0.4654847	-1.7140929	0.005524862	0.040000677	0.98	5245	tags=63%, list=29%, signal=89%
BIOCARTA_GCR_PATHWAY	BIOCARTA_GCR_PATHWAY		17	-0.5790699	-1.7118199	0.022140222	0.040610492	0.982	3857	tags=59%, list=21%, signal=75%
SATO_SILENCED_BY_METHYLATION_IN_PANCREATIC_CANCER_1	SATO_SILENCED_BY_METHYLATION_IN_PANCREATIC_CANCER_1		301	-0.34984258	-1.7116104	0	0.040533803	0.982	2209	tags=28%, list=12%, signal=31%
NGO_MALIGNANT_GLIOMA_1P_LOH	NGO_MALIGNANT_GLIOMA_1P_LOH		16	-0.6032951	-1.710808	0.010238908	0.04063568	0.982	4948	tags=69%, list=27%, signal=95%
DELLA_RESPONSE_TO_TSA_AND_BUTYRATE	DELLA_RESPONSE_TO_TSA_AND_BUTYRATE		21	-0.52947396	-1.710644	0.01826484	0.040557623	0.982	2410	tags=38%, list=13%, signal=44%
GENTILE_UV_RESPONSE_CLUSTER_D1	GENTILE_UV_RESPONSE_CLUSTER_D1		18	-0.5705934	-1.7101991	0.016460905	0.040531106	0.982	3354	tags=61%, list=19%, signal=75%
DASU_IL6_SIGNALING_UP	DASU_IL6_SIGNALING_UP		55	-0.44568032	-1.7100579	0	0.040444486	0.982	2901	tags=40%, list=16%, signal=48%
MILI_PSEUDOPODIA	MILI_PSEUDOPODIA		41	-0.46709982	-1.7095541	0.005050505	0.040495954	0.983	2383	tags=29%, list=13%, signal=34%
HONRADO_BREAST_CANCER_BRCA1_VS_BRCA2	HONRADO_BREAST_CANCER_BRCA1_VS_BRCA2		16	-0.6049832	-1.7039386	0.018939395	0.042182665	0.987	1856	tags=44%, list=10%, signal=49%
REACTOME_ER_PHAGOSOME_PATHWAY	REACTOME_ER_PHAGOSOME_PATHWAY		57	-0.44434294	-1.7028733	0	0.04229596	0.987	5245	tags=61%, list=29%, signal=86%
MUELLER_COMMON_TARGETS_OF_AML_FUSIONS_DN	MUELLER_COMMON_TARGETS_OF_AML_FUSIONS_DN		25	-0.5267172	-1.6962883	0	0.044324957	0.989	1579	tags=32%, list=9%, signal=35%
KARAKAS_TGFB1_SIGNALING	KARAKAS_TGFB1_SIGNALING		15	-0.5952341	-1.6893307	0.026755853	0.046572756	0.993	2471	tags=53%, list=14%, signal=62%
BOYAULT_LIVER_CANCER_SUBCLASS_G6_DN	BOYAULT_LIVER_CANCER_SUBCLASS_G6_DN		15	-0.58519405	-1.6889186	0.016597511	0.046634916	0.993	3040	tags=53%, list=17%, signal=64%
PID_EPHB_FWD_PATHWAY	PID_EPHB_FWD_PATHWAY		38	-0.47349188	-1.6840627	0	0.04831197	0.994	3012	tags=37%, list=17%, signal=44%
GARY_CD5_TARGETS_DN	GARY_CD5_TARGETS_DN		408	-0.32986623	-1.6837208	0	0.04822157	0.994	4434	tags=42%, list=25%, signal=54%
BOYAULT_LIVER_CANCER_SUBCLASS_G23_UP	BOYAULT_LIVER_CANCER_SUBCLASS_G23_UP		49	-0.45040253	-1.6803234	0.005376344	0.04926197	0.995	2849	tags=49%, list=16%, signal=58%
KUNINGER_IGF1_VS_PDGFB_TARGETS_DN	KUNINGER_IGF1_VS_PDGFB_TARGETS_DN		39	-0.44844696	-1.6775908	0	0.049985714	0.996	1998	tags=38%, list=11%, signal=43%
GROSS_ELK3_TARGETS_DN	GROSS_ELK3_TARGETS_DN		25	-0.51273644	-1.6771744	0.018099548	0.049968585	0.996	1632	tags=32%, list=9%, signal=35%
BIOCARTA_RHO_PATHWAY	BIOCARTA_RHO_PATHWAY		29	-0.49523127	-1.6756271	0	0.05037802	0.996	2906	tags=38%, list=16%, signal=45%
BECKER_TAMOXIFEN_RESISTANCE_DN	BECKER_TAMOXIFEN_RESISTANCE_DN		43	-0.46267718	-1.6744705	0.009345794	0.05047551	0.996	3072	tags=37%, list=17%, signal=45%
GOLUB_ALL_VS_AML_UP	GOLUB_ALL_VS_AML_UP		23	-0.5439775	-1.673525	0.004166667	0.050677516	0.997	4585	tags=70%, list=25%, signal=93%
DER_IFN_GAMMA_RESPONSE_UP	DER_IFN_GAMMA_RESPONSE_UP		68	-0.42479435	-1.6730435	0	0.050660912	0.997	4501	tags=47%, list=25%, signal=62%
REACTOME_APOPTOTIC_CLEAVAGE_OF_CELLULAR_PROTEINS	REACTOME_APOPTOTIC_CLEAVAGE_OF_CELLULAR_PROTEINS		33	-0.47418264	-1.6719549	0	0.05100827	0.998	3068	tags=39%, list=17%, signal=47%
REACTOME_CYTOKINE_SIGNALING_IN_IMMUNE_SYSTEM	REACTOME_CYTOKINE_SIGNALING_IN_IMMUNE_SYSTEM		214	-0.34110156	-1.6679443	0	0.052435316	0.998	3339	tags=33%, list=19%, signal=40%
SASAKI_ADULT_T_CELL_LEUKEMIA	SASAKI_ADULT_T_CELL_LEUKEMIA		161	-0.36494657	-1.6636567	0	0.053989433	0.998	2444	tags=32%, list=14%, signal=37%
KEGG_THYROID_CANCER	KEGG_THYROID_CANCER		26	-0.50573844	-1.6612506	0.023904383	0.05465339	0.998	3666	tags=42%, list=20%, signal=53%
GRADE_COLON_AND_RECTAL_CANCER_UP	GRADE_COLON_AND_RECTAL_CANCER_UP		266	-0.3384879	-1.6608887	0	0.05460368	0.998	3499	tags=30%, list=19%, signal=37%
BERNARD_PPAPDC1B_TARGETS_DN	BERNARD_PPAPDC1B_TARGETS_DN		48	-0.43090084	-1.6589308	0	0.05527458	0.998	879	tags=19%, list=5%, signal=20%
KIM_BIPOLAR_DISORDER_OLIGODENDROCYTE_DENSITY_CORR_DN	KIM_BIPOLAR_DISORDER_OLIGODENDROCYTE_DENSITY_CORR_DN		43	-0.45371062	-1.6569816	0.011173184	0.056036174	0.998	2704	tags=35%, list=15%, signal=41%
CHICAS_RB1_TARGETS_LOW_SERUM	CHICAS_RB1_TARGETS_LOW_SERUM		85	-0.4088251	-1.6564208	0	0.05613138	0.998	2865	tags=38%, list=16%, signal=45%
REACTOME_ANTIVIRAL_MECHANISM_BY_IFN_STIMULATED_GENES	REACTOME_ANTIVIRAL_MECHANISM_BY_IFN_STIMULATED_GENES		65	-0.40774474	-1.6563501	0	0.05599602	0.998	3779	tags=35%, list=21%, signal=45%
SATO_SILENCED_BY_METHYLATION_IN_PANCREATIC_CANCER_2	SATO_SILENCED_BY_METHYLATION_IN_PANCREATIC_CANCER_2		33	-0.47256583	-1.6558629	0.008196721	0.05603479	0.998	1716	tags=39%, list=10%, signal=43%
JI_RESPONSE_TO_FSH_DN	JI_RESPONSE_TO_FSH_DN		57	-0.42856964	-1.6555413	0	0.05593776	0.998	2510	tags=30%, list=14%, signal=35%
SCHAEFFER_SOX9_TARGETS_IN_PROSTATE_DEVELOPMENT_UP	SCHAEFFER_SOX9_TARGETS_IN_PROSTATE_DEVELOPMENT_UP		16	-0.5841938	-1.654459	0.018656716	0.056263108	0.998	651	tags=25%, list=4%, signal=26%
MARKEY_RB1_ACUTE_LOF_UP	MARKEY_RB1_ACUTE_LOF_UP		164	-0.35638055	-1.6530383	0	0.056635734	0.999	3644	tags=42%, list=20%, signal=52%
HU_ANGIOGENESIS_DN	HU_ANGIOGENESIS_DN		34	-0.46692446	-1.6502285	0.013043478	0.057646863	0.999	2678	tags=32%, list=15%, signal=38%
ZHANG_BREAST_CANCER_PROGENITORS_UP	ZHANG_BREAST_CANCER_PROGENITORS_UP		403	-0.32527918	-1.6486984	0	0.05811125	0.999	3518	tags=34%, list=20%, signal=41%
BIOCARTA_G2_PATHWAY	BIOCARTA_G2_PATHWAY		24	-0.51096255	-1.6480137	0.020661157	0.058234174	0.999	2729	tags=46%, list=15%, signal=54%
REACTOME_GLOBAL_GENOMIC_NER_GG_NER	REACTOME_GLOBAL_GENOMIC_NER_GG_NER		31	-0.48096192	-1.6464826	0.008928572	0.058672097	0.999	4030	tags=45%, list=22%, signal=58%
ABBUD_LIF_SIGNALING_1_UP	ABBUD_LIF_SIGNALING_1_UP		34	-0.47877857	-1.6459342	0.004444445	0.058714155	0.999	1632	tags=32%, list=9%, signal=36%
PLASARI_TGFB1_SIGNALING_VIA_NFIC_10HR_UP	PLASARI_TGFB1_SIGNALING_VIA_NFIC_10HR_UP		43	-0.45594254	-1.6457069	0.005181347	0.05865687	0.999	2464	tags=42%, list=14%, signal=48%
NAKAYAMA_SOFT_TISSUE_TUMORS_PCA1_DN	NAKAYAMA_SOFT_TISSUE_TUMORS_PCA1_DN		60	-0.4238314	-1.6395402	0	0.06090106	0.999	1798	tags=28%, list=10%, signal=31%
KAUFFMANN_DNA_REPAIR_GENES	KAUFFMANN_DNA_REPAIR_GENES		220	-0.34882256	-1.6387689	0	0.06110383	0.999	3673	tags=38%, list=20%, signal=47%
PID_SYNDECAN_1_PATHWAY	PID_SYNDECAN_1_PATHWAY		40	-0.45751074	-1.6355587	0.004651163	0.062186234	1	682	tags=20%, list=4%, signal=21%
KEGG_HOMOLOGOUS_RECOMBINATION	KEGG_HOMOLOGOUS_RECOMBINATION		28	-0.4986535	-1.6342967	0.013574661	0.06261582	1	4185	tags=54%, list=23%, signal=70%
NABA_COLLAGENS	NABA_COLLAGENS		37	-0.46661982	-1.6339779	0.004975124	0.06262685	1	2302	tags=41%, list=13%, signal=46%
LIEN_BREAST_CARCINOMA_METAPLASTIC_VS_DUCTAL_UP	LIEN_BREAST_CARCINOMA_METAPLASTIC_VS_DUCTAL_UP		67	-0.41054642	-1.6336211	0	0.0626032	1	1986	tags=28%, list=11%, signal=32%
HOOI_ST7_TARGETS_DN	HOOI_ST7_TARGETS_DN		99	-0.385789	-1.6300468	0	0.064276226	1	2528	tags=32%, list=14%, signal=37%
BERTUCCI_INVASIVE_CARCINOMA_DUCTAL_VS_LOBULAR_DN	BERTUCCI_INVASIVE_CARCINOMA_DUCTAL_VS_LOBULAR_DN		31	-0.4766277	-1.6272526	0.014084507	0.06534641	1	2375	tags=32%, list=13%, signal=37%
CHIARADONNA_NEOPLASTIC_TRANSFORMATION_CDC25_UP	CHIARADONNA_NEOPLASTIC_TRANSFORMATION_CDC25_UP		107	-0.3701489	-1.6268847	0	0.06534215	1	2141	tags=29%, list=12%, signal=33%
RADAEVA_RESPONSE_TO_IFNA1_UP	RADAEVA_RESPONSE_TO_IFNA1_UP		49	-0.4449566	-1.6250037	0	0.06608941	1	2974	tags=37%, list=16%, signal=44%
REACTOME_COLLAGEN_FORMATION	REACTOME_COLLAGEN_FORMATION		48	-0.42403698	-1.623417	0.010152284	0.066647194	1	2302	tags=33%, list=13%, signal=38%
REACTOME_EXTRACELLULAR_MATRIX_ORGANIZATION	REACTOME_EXTRACELLULAR_MATRIX_ORGANIZATION		60	-0.42053258	-1.6195395	0.00591716	0.06831406	1	2302	tags=32%, list=13%, signal=36%
VALK_AML_CLUSTER_4	VALK_AML_CLUSTER_4		22	-0.51939166	-1.6184016	0.024691358	0.06876322	1	690	tags=18%, list=4%, signal=19%
MMS_MOUSE_LYMPH_HIGH_4HRS_UP	MMS_MOUSE_LYMPH_HIGH_4HRS_UP		33	-0.46533877	-1.6181207	0.004219409	0.0687317	1	2160	tags=27%, list=12%, signal=31%
XU_AKT1_TARGETS_6HR	XU_AKT1_TARGETS_6HR		25	-0.49521384	-1.6134865	0.023529412	0.07085604	1	3627	tags=60%, list=20%, signal=75%
XU_HGF_SIGNALING_NOT_VIA_AKT1_48HR_DN	XU_HGF_SIGNALING_NOT_VIA_AKT1_48HR_DN		19	-0.5464516	-1.6134266	0.02734375	0.070681795	1	2068	tags=47%, list=11%, signal=53%
BEIER_GLIOMA_STEM_CELL_UP	BEIER_GLIOMA_STEM_CELL_UP		26	-0.5025806	-1.6113372	0	0.071689054	1	1340	tags=31%, list=7%, signal=33%
BHATI_G2M_ARREST_BY_2METHOXYESTRADIOL_UP	BHATI_G2M_ARREST_BY_2METHOXYESTRADIOL_UP		101	-0.39336702	-1.6099337	0	0.07226638	1	2849	tags=38%, list=16%, signal=44%
TONKS_TARGETS_OF_RUNX1_RUNX1T1_FUSION_MONOCYTE_UP	TONKS_TARGETS_OF_RUNX1_RUNX1T1_FUSION_MONOCYTE_UP		185	-0.3507611	-1.6065248	0	0.073869355	1	2910	tags=28%, list=16%, signal=33%
POMEROY_MEDULLOBLASTOMA_DESMOPLASIC_VS_CLASSIC_DN	POMEROY_MEDULLOBLASTOMA_DESMOPLASIC_VS_CLASSIC_DN		56	-0.4082438	-1.6062738	0	0.07380916	1	2867	tags=30%, list=16%, signal=36%
MA_MYELOID_DIFFERENTIATION_UP	MA_MYELOID_DIFFERENTIATION_UP		33	-0.45885506	-1.6040003	0.009009009	0.07467676	1	4601	tags=58%, list=26%, signal=77%
HOFFMANN_IMMATURE_TO_MATURE_B_LYMPHOCYTE_DN	HOFFMANN_IMMATURE_TO_MATURE_B_LYMPHOCYTE_DN		40	-0.4313978	-1.6029322	0.01826484	0.075035155	1	4416	tags=50%, list=24%, signal=66%
NAKAMURA_TUMOR_ZONE_PERIPHERAL_VS_CENTRAL_UP	NAKAMURA_TUMOR_ZONE_PERIPHERAL_VS_CENTRAL_UP		259	-0.33109447	-1.6028584	0	0.07487782	1	3689	tags=40%, list=20%, signal=50%
GRUETZMANN_PANCREATIC_CANCER_UP	GRUETZMANN_PANCREATIC_CANCER_UP		322	-0.32538134	-1.5993972	0	0.07670036	1	3787	tags=37%, list=21%, signal=46%
KOKKINAKIS_METHIONINE_DEPRIVATION_48HR_UP	KOKKINAKIS_METHIONINE_DEPRIVATION_48HR_UP		119	-0.35696992	-1.5992626	0	0.07658275	1	3144	tags=35%, list=17%, signal=42%
SARTIPY_BLUNTED_BY_INSULIN_RESISTANCE_UP	SARTIPY_BLUNTED_BY_INSULIN_RESISTANCE_UP		18	-0.54447263	-1.5979545	0.03717472	0.077220455	1	2421	tags=33%, list=13%, signal=38%
DAUER_STAT3_TARGETS_DN	DAUER_STAT3_TARGETS_DN		46	-0.43435672	-1.5969332	0	0.07753619	1	3423	tags=50%, list=19%, signal=62%
TONKS_TARGETS_OF_RUNX1_RUNX1T1_FUSION_HSC_DN	TONKS_TARGETS_OF_RUNX1_RUNX1T1_FUSION_HSC_DN		137	-0.34903738	-1.5956161	0	0.07791861	1	2887	tags=32%, list=16%, signal=38%
MEINHOLD_OVARIAN_CANCER_LOW_GRADE_DN	MEINHOLD_OVARIAN_CANCER_LOW_GRADE_DN		20	-0.51584506	-1.5948234	0.022727273	0.07812076	1	3928	tags=50%, list=22%, signal=64%
ACEVEDO_FGFR1_TARGETS_IN_PROSTATE_CANCER_MODEL_UP	ACEVEDO_FGFR1_TARGETS_IN_PROSTATE_CANCER_MODEL_UP		206	-0.33269578	-1.5942309	0	0.078233354	1	2706	tags=35%, list=15%, signal=41%
MAGRANGEAS_MULTIPLE_MYELOMA_IGG_VS_IGA_UP	MAGRANGEAS_MULTIPLE_MYELOMA_IGG_VS_IGA_UP		19	-0.52557683	-1.593581	0.027027028	0.07844271	1	2821	tags=37%, list=16%, signal=44%
ONO_FOXP3_TARGETS_DN	ONO_FOXP3_TARGETS_DN		25	-0.48832422	-1.5899992	0.015748031	0.080082595	1	1856	tags=40%, list=10%, signal=45%
BILANGES_SERUM_RESPONSE_TRANSLATION	BILANGES_SERUM_RESPONSE_TRANSLATION		30	-0.4712992	-1.5891407	0.024291499	0.08042227	1	3596	tags=20%, list=20%, signal=25%
LEE_RECENT_THYMIC_EMIGRANT	LEE_RECENT_THYMIC_EMIGRANT		190	-0.32895833	-1.5883495	0	0.080704026	1	1745	tags=19%, list=10%, signal=21%
KIM_WT1_TARGETS_UP	KIM_WT1_TARGETS_UP		201	-0.3335583	-1.5882025	0	0.0805772	1	2987	tags=34%, list=17%, signal=40%
REACTOME_SIGNALLING_TO_ERKS	REACTOME_SIGNALLING_TO_ERKS		35	-0.44840333	-1.5857472	0.014018691	0.081935935	1	3132	tags=37%, list=17%, signal=45%
REACTOME_APOPTOSIS	REACTOME_APOPTOSIS		131	-0.35370287	-1.5841551	0.010989011	0.08246588	1	3157	tags=27%, list=18%, signal=33%
HERNANDEZ_MITOTIC_ARREST_BY_DOCETAXEL_1_DN	HERNANDEZ_MITOTIC_ARREST_BY_DOCETAXEL_1_DN		34	-0.44377673	-1.5836915	0.008695652	0.08257105	1	3035	tags=44%, list=17%, signal=53%
DAZARD_UV_RESPONSE_CLUSTER_G24	DAZARD_UV_RESPONSE_CLUSTER_G24		18	-0.53115326	-1.5836232	0.021352313	0.08240981	1	2238	tags=44%, list=12%, signal=51%
BIOCARTA_ATM_PATHWAY	BIOCARTA_ATM_PATHWAY		20	-0.51555145	-1.5813771	0.037453182	0.08361839	1	2504	tags=35%, list=14%, signal=41%
REACTOME_SIGNALING_BY_WNT	REACTOME_SIGNALING_BY_WNT		61	-0.39531413	-1.5809484	0.012578616	0.08372026	1	5293	tags=57%, list=29%, signal=81%
RIGGI_EWING_SARCOMA_PROGENITOR_DN	RIGGI_EWING_SARCOMA_PROGENITOR_DN		158	-0.34303838	-1.5791241	0	0.08451	1	1980	tags=35%, list=11%, signal=39%
BIOCARTA_FAS_PATHWAY	BIOCARTA_FAS_PATHWAY		29	-0.47373796	-1.5758975	0.004347826	0.086209886	1	4145	tags=48%, list=23%, signal=63%
YAO_TEMPORAL_RESPONSE_TO_PROGESTERONE_CLUSTER_9	YAO_TEMPORAL_RESPONSE_TO_PROGESTERONE_CLUSTER_9		58	-0.39530155	-1.5749722	0.006711409	0.08646152	1	2494	tags=34%, list=14%, signal=40%
TONKS_TARGETS_OF_RUNX1_RUNX1T1_FUSION_SUSTAINED_IN_MONOCYTE_UP	TONKS_TARGETS_OF_RUNX1_RUNX1T1_FUSION_SUSTAINED_IN_MONOCYTE_UP		19	-0.5295791	-1.5740457	0.035714287	0.086794116	1	2260	tags=53%, list=13%, signal=60%
MURATA_VIRULENCE_OF_H_PILORI	MURATA_VIRULENCE_OF_H_PILORI		16	-0.5510169	-1.5732756	0.044280443	0.08698362	1	2266	tags=56%, list=13%, signal=64%
REACTOME_METABOLISM_OF_NUCLEOTIDES	REACTOME_METABOLISM_OF_NUCLEOTIDES		62	-0.40706992	-1.5717658	0	0.08762162	1	2700	tags=32%, list=15%, signal=38%
REACTOME_HOST_INTERACTIONS_OF_HIV_FACTORS	REACTOME_HOST_INTERACTIONS_OF_HIV_FACTORS		115	-0.35867196	-1.5705935	0	0.08812685	1	4488	tags=40%, list=25%, signal=53%
MALONEY_RESPONSE_TO_17AAG_DN	MALONEY_RESPONSE_TO_17AAG_DN		78	-0.376433	-1.568746	0	0.088829964	1	4607	tags=42%, list=26%, signal=57%
WIELAND_UP_BY_HBV_INFECTION	WIELAND_UP_BY_HBV_INFECTION		77	-0.38225344	-1.5679882	0.007462686	0.08911352	1	2136	tags=34%, list=12%, signal=38%
BURTON_ADIPOGENESIS_4	BURTON_ADIPOGENESIS_4		43	-0.42766196	-1.5669972	0.009708738	0.089424886	1	3415	tags=40%, list=19%, signal=49%
PENG_LEUCINE_DEPRIVATION_DN	PENG_LEUCINE_DEPRIVATION_DN		180	-0.3344497	-1.5660945	0	0.08977337	1	4893	tags=42%, list=27%, signal=57%
PID_AURORA_A_PATHWAY	PID_AURORA_A_PATHWAY		30	-0.46952918	-1.5660124	0.02232143	0.08960713	1	2410	tags=40%, list=13%, signal=46%
LEIN_ASTROCYTE_MARKERS	LEIN_ASTROCYTE_MARKERS		27	-0.4693394	-1.5648847	0.033816423	0.09001884	1	1204	tags=22%, list=7%, signal=24%
REACTOME_INTEGRIN_ALPHAIIB_BETA3_SIGNALING	REACTOME_INTEGRIN_ALPHAIIB_BETA3_SIGNALING		22	-0.50516546	-1.5641526	0.012552301	0.090217665	1	552	tags=18%, list=3%, signal=19%
KEGG_COLORECTAL_CANCER	KEGG_COLORECTAL_CANCER		59	-0.3943545	-1.5631967	0	0.090631954	1	3831	tags=41%, list=21%, signal=51%
LU_TUMOR_ANGIOGENESIS_UP	LU_TUMOR_ANGIOGENESIS_UP		24	-0.5038707	-1.5605373	0.011764706	0.09206262	1	1906	tags=42%, list=11%, signal=47%
BIOCARTA_CASPASE_PATHWAY	BIOCARTA_CASPASE_PATHWAY		20	-0.5165839	-1.5600154	0.04	0.092155166	1	2617	tags=40%, list=15%, signal=47%
OUELLET_OVARIAN_CANCER_INVASIVE_VS_LMP_UP	OUELLET_OVARIAN_CANCER_INVASIVE_VS_LMP_UP		115	-0.3565753	-1.5599245	0	0.09199461	1	3722	tags=36%, list=21%, signal=45%
CHEN_ETV5_TARGETS_TESTIS	CHEN_ETV5_TARGETS_TESTIS		17	-0.5447444	-1.5594563	0.045614034	0.09202725	1	3499	tags=71%, list=19%, signal=87%
BOYLAN_MULTIPLE_MYELOMA_PCA3_DN	BOYLAN_MULTIPLE_MYELOMA_PCA3_DN		56	-0.3952154	-1.5586951	0	0.0922946	1	1964	tags=27%, list=11%, signal=30%
GENTILE_UV_RESPONSE_CLUSTER_D6	GENTILE_UV_RESPONSE_CLUSTER_D6		35	-0.45061567	-1.5572182	0.009302326	0.09314389	1	3140	tags=34%, list=17%, signal=41%
HUMMERICH_SKIN_CANCER_PROGRESSION_UP	HUMMERICH_SKIN_CANCER_PROGRESSION_UP		71	-0.38843298	-1.5568	0	0.09321883	1	2421	tags=34%, list=13%, signal=39%
AMIT_SERUM_RESPONSE_20_MCF10A	AMIT_SERUM_RESPONSE_20_MCF10A		17	-0.528189	-1.5547065	0.04942966	0.0940335	1	2202	tags=29%, list=12%, signal=33%
REACTOME_HOMOLOGOUS_RECOMBINATION_REPAIR_OF_REPLICATION_INDEPENDENT_DOUBLE_STRAND_BREAKS	REACTOME_HOMOLOGOUS_RECOMBINATION_REPAIR_OF_REPLICATION_INDEPENDENT_DOUBLE_STRAND_BREAKS		16	-0.54655796	-1.5543827	0.03202847	0.09401974	1	2736	tags=50%, list=15%, signal=59%
MARKEY_RB1_CHRONIC_LOF_UP	MARKEY_RB1_CHRONIC_LOF_UP		103	-0.36072418	-1.5539821	0.008928572	0.09404748	1	3499	tags=47%, list=19%, signal=57%
MORI_LARGE_PRE_BII_LYMPHOCYTE_DN	MORI_LARGE_PRE_BII_LYMPHOCYTE_DN		46	-0.41886657	-1.5536511	0.017045455	0.09407907	1	3003	tags=48%, list=17%, signal=57%
JOHANSSON_GLIOMAGENESIS_BY_PDGFB_UP	JOHANSSON_GLIOMAGENESIS_BY_PDGFB_UP		55	-0.41262925	-1.553456	0.016853932	0.09398515	1	2260	tags=33%, list=13%, signal=37%
PID_EPHRINB_REV_PATHWAY	PID_EPHRINB_REV_PATHWAY		23	-0.49186513	-1.5531247	0.033195022	0.093937576	1	1090	tags=17%, list=6%, signal=18%
DITTMER_PTHLH_TARGETS_UP	DITTMER_PTHLH_TARGETS_UP		109	-0.35534108	-1.5511466	0	0.094784245	1	3892	tags=42%, list=22%, signal=53%
ZHANG_GATA6_TARGETS_DN	ZHANG_GATA6_TARGETS_DN		54	-0.41031164	-1.5502343	0.005747126	0.09510631	1	3219	tags=44%, list=18%, signal=54%
CAFFAREL_RESPONSE_TO_THC_DN	CAFFAREL_RESPONSE_TO_THC_DN		29	-0.45637316	-1.5487534	0.014018691	0.09584247	1	3389	tags=48%, list=19%, signal=59%
IRITANI_MAD1_TARGETS_DN	IRITANI_MAD1_TARGETS_DN		45	-0.41124105	-1.5479695	0.010416667	0.09612266	1	3230	tags=27%, list=18%, signal=32%
DOANE_RESPONSE_TO_ANDROGEN_DN	DOANE_RESPONSE_TO_ANDROGEN_DN		224	-0.3260355	-1.5478717	0	0.09594988	1	2780	tags=31%, list=15%, signal=36%
REACTOME_ACTIVATED_TLR4_SIGNALLING	REACTOME_ACTIVATED_TLR4_SIGNALLING		88	-0.3700121	-1.5476943	0	0.09582947	1	4136	tags=39%, list=23%, signal=50%
REACTOME_MYD88_MAL_CASCADE_INITIATED_ON_PLASMA_MEMBRANE	REACTOME_MYD88_MAL_CASCADE_INITIATED_ON_PLASMA_MEMBRANE		78	-0.36987248	-1.5462167	0.006896552	0.09662898	1	4026	tags=36%, list=22%, signal=46%
PETROVA_PROX1_TARGETS_DN	PETROVA_PROX1_TARGETS_DN		54	-0.40044203	-1.5460002	0	0.09654511	1	2899	tags=43%, list=16%, signal=51%
REACTOME_AUTODEGRADATION_OF_CDH1_BY_CDH1_APC_C	REACTOME_AUTODEGRADATION_OF_CDH1_BY_CDH1_APC_C		56	-0.3999682	-1.5447663	0	0.09718036	1	5245	tags=55%, list=29%, signal=78%
MUNSHI_MULTIPLE_MYELOMA_UP	MUNSHI_MULTIPLE_MYELOMA_UP		74	-0.3759404	-1.5445023	0.016949153	0.09705182	1	2367	tags=23%, list=13%, signal=26%
ELVIDGE_HIF1A_AND_HIF2A_TARGETS_DN	ELVIDGE_HIF1A_AND_HIF2A_TARGETS_DN		96	-0.3671351	-1.5424521	0	0.098196484	1	3648	tags=46%, list=20%, signal=57%
BOYAULT_LIVER_CANCER_SUBCLASS_G3_DN	BOYAULT_LIVER_CANCER_SUBCLASS_G3_DN		36	-0.43325967	-1.5408477	0.010256411	0.09910603	1	2209	tags=44%, list=12%, signal=51%
YANG_BREAST_CANCER_ESR1_LASER_DN	YANG_BREAST_CANCER_ESR1_LASER_DN		45	-0.41075814	-1.5408341	0.021978023	0.09888585	1	3135	tags=42%, list=17%, signal=51%
REACTOME_DOUBLE_STRAND_BREAK_REPAIR	REACTOME_DOUBLE_STRAND_BREAK_REPAIR		22	-0.47765496	-1.5403388	0.027667984	0.09900262	1	3875	tags=50%, list=21%, signal=64%
DANG_REGULATED_BY_MYC_UP	DANG_REGULATED_BY_MYC_UP		69	-0.38720715	-1.540062	0	0.09890825	1	4532	tags=45%, list=25%, signal=60%
BRIDEAU_IMPRINTED_GENES	BRIDEAU_IMPRINTED_GENES		45	-0.41453487	-1.5386509	0	0.09949487	1	1159	tags=22%, list=6%, signal=24%
LIANG_SILENCED_BY_METHYLATION_2	LIANG_SILENCED_BY_METHYLATION_2		39	-0.43508437	-1.5380019	0.014285714	0.09967341	1	1009	tags=26%, list=6%, signal=27%
YAO_HOXA10_TARGETS_VIA_PROGESTERONE_UP	YAO_HOXA10_TARGETS_VIA_PROGESTERONE_UP		59	-0.38824493	-1.5377276	0	0.09966925	1	1644	tags=25%, list=9%, signal=28%
MAGRANGEAS_MULTIPLE_MYELOMA_IGG_VS_IGA_DN	MAGRANGEAS_MULTIPLE_MYELOMA_IGG_VS_IGA_DN		21	-0.502638	-1.5365084	0.033707865	0.10017725	1	3951	tags=38%, list=22%, signal=49%
BORLAK_LIVER_CANCER_EGF_UP	BORLAK_LIVER_CANCER_EGF_UP		45	-0.417996	-1.5363188	0.031746034	0.100094676	1	2782	tags=42%, list=15%, signal=50%
REACTOME_PROTEIN_FOLDING	REACTOME_PROTEIN_FOLDING		48	-0.41009942	-1.5351369	0.016666668	0.10066813	1	4655	tags=52%, list=26%, signal=70%
BOWIE_RESPONSE_TO_EXTRACELLULAR_MATRIX	BOWIE_RESPONSE_TO_EXTRACELLULAR_MATRIX		16	-0.5405471	-1.5316253	0.06949807	0.10259498	1	1567	tags=44%, list=9%, signal=48%
GILDEA_METASTASIS	GILDEA_METASTASIS		24	-0.48189276	-1.5289085	0.054166667	0.1042334	1	1132	tags=29%, list=6%, signal=31%
PID_PRL_SIGNALING_EVENTS_PATHWAY	PID_PRL_SIGNALING_EVENTS_PATHWAY		22	-0.48936915	-1.5287917	0.044715445	0.104098186	1	2902	tags=50%, list=16%, signal=60%
REACTOME_SHC_MEDIATED_SIGNALLING	REACTOME_SHC_MEDIATED_SIGNALLING		15	-0.54397446	-1.5283103	0.045454547	0.1041774	1	3012	tags=33%, list=17%, signal=40%
COLINA_TARGETS_OF_4EBP1_AND_4EBP2	COLINA_TARGETS_OF_4EBP1_AND_4EBP2		313	-0.31652728	-1.527809	0	0.1042214	1	2367	tags=30%, list=13%, signal=34%
FARDIN_HYPOXIA_11	FARDIN_HYPOXIA_11		32	-0.45423535	-1.526406	0.008196721	0.10500683	1	3664	tags=47%, list=20%, signal=59%
MARTINEZ_RESPONSE_TO_TRABECTEDIN	MARTINEZ_RESPONSE_TO_TRABECTEDIN		49	-0.3953082	-1.5259442	0	0.10518129	1	3666	tags=43%, list=20%, signal=54%
SERVITJA_LIVER_HNF1A_TARGETS_UP	SERVITJA_LIVER_HNF1A_TARGETS_UP		111	-0.34566328	-1.5257696	0	0.10506212	1	2120	tags=35%, list=12%, signal=40%
REACTOME_PURINE_METABOLISM	REACTOME_PURINE_METABOLISM		29	-0.4643983	-1.5242186	0.018957347	0.10596474	1	3703	tags=41%, list=21%, signal=52%
SMID_BREAST_CANCER_RELAPSE_IN_LUNG_UP	SMID_BREAST_CANCER_RELAPSE_IN_LUNG_UP		15	-0.5389061	-1.5232655	0.05035971	0.10639732	1	2994	tags=47%, list=17%, signal=56%
ZHAN_MULTIPLE_MYELOMA_LB_DN	ZHAN_MULTIPLE_MYELOMA_LB_DN		34	-0.4290574	-1.5230919	0.01826484	0.10628213	1	1678	tags=21%, list=9%, signal=23%
ROESSLER_LIVER_CANCER_METASTASIS_UP	ROESSLER_LIVER_CANCER_METASTASIS_UP		87	-0.3587325	-1.5222147	0	0.106687784	1	2340	tags=26%, list=13%, signal=30%
KENNY_CTNNB1_TARGETS_DN	KENNY_CTNNB1_TARGETS_DN		49	-0.4060253	-1.5218637	0.016759777	0.10673261	1	2457	tags=22%, list=14%, signal=26%
BIOCARTA_CDC42RAC_PATHWAY	BIOCARTA_CDC42RAC_PATHWAY		16	-0.5355808	-1.5215778	0.04494382	0.106664814	1	4273	tags=50%, list=24%, signal=65%
PID_CDC42_REG_PATHWAY	PID_CDC42_REG_PATHWAY		30	-0.44916135	-1.521102	0.02008032	0.106723234	1	4273	tags=47%, list=24%, signal=61%
KEGG_APOPTOSIS	KEGG_APOPTOSIS		74	-0.3722128	-1.5208896	0.020689655	0.10664436	1	3698	tags=35%, list=21%, signal=44%
DAVICIONI_RHABDOMYOSARCOMA_PAX_FOXO1_FUSION_UP	DAVICIONI_RHABDOMYOSARCOMA_PAX_FOXO1_FUSION_UP		57	-0.38974068	-1.5204673	0.022727273	0.10664984	1	2410	tags=37%, list=13%, signal=42%
REACTOME_PLATELET_AGGREGATION_PLUG_FORMATION	REACTOME_PLATELET_AGGREGATION_PLUG_FORMATION		25	-0.4620668	-1.5200273	0.023904383	0.10673569	1	552	tags=16%, list=3%, signal=16%
REACTOME_PYRIMIDINE_METABOLISM	REACTOME_PYRIMIDINE_METABOLISM		20	-0.49999955	-1.5198745	0.033755273	0.10656675	1	1437	tags=25%, list=8%, signal=27%
RAMALHO_STEMNESS_DN	RAMALHO_STEMNESS_DN		56	-0.3848987	-1.5198545	0	0.106343605	1	2530	tags=38%, list=14%, signal=43%
GARCIA_TARGETS_OF_FLI1_AND_DAX1_DN	GARCIA_TARGETS_OF_FLI1_AND_DAX1_DN		158	-0.33205286	-1.5194595	0	0.1063343	1	2539	tags=29%, list=14%, signal=34%
BIOCARTA_G1_PATHWAY	BIOCARTA_G1_PATHWAY		28	-0.45134914	-1.5176307	0.01746725	0.1073909	1	2729	tags=39%, list=15%, signal=46%
SHAFFER_IRF4_TARGETS_IN_ACTIVATED_DENDRITIC_CELL	SHAFFER_IRF4_TARGETS_IN_ACTIVATED_DENDRITIC_CELL		60	-0.38740417	-1.5168759	0.006289308	0.10768794	1	3913	tags=40%, list=22%, signal=51%
SCHLOSSER_MYC_TARGETS_AND_SERUM_RESPONSE_DN	SCHLOSSER_MYC_TARGETS_AND_SERUM_RESPONSE_DN		46	-0.4006283	-1.5168645	0.02793296	0.10746479	1	4124	tags=41%, list=23%, signal=53%
RICKMAN_TUMOR_DIFFERENTIATED_WELL_VS_MODERATELY_DN	RICKMAN_TUMOR_DIFFERENTIATED_WELL_VS_MODERATELY_DN		75	-0.36000884	-1.5132297	0.026086956	0.109593004	1	2484	tags=29%, list=14%, signal=34%
REACTOME_CLASS_A1_RHODOPSIN_LIKE_RECEPTORS	REACTOME_CLASS_A1_RHODOPSIN_LIKE_RECEPTORS		117	-0.34359166	-1.513096	0	0.1094681	1	586	tags=15%, list=3%, signal=16%
ZHANG_RESPONSE_TO_CANTHARIDIN_DN	ZHANG_RESPONSE_TO_CANTHARIDIN_DN		67	-0.37601236	-1.5117432	0	0.11015642	1	4821	tags=48%, list=27%, signal=65%
HAHTOLA_MYCOSIS_FUNGOIDES_SKIN_DN	HAHTOLA_MYCOSIS_FUNGOIDES_SKIN_DN		20	-0.48542413	-1.5101485	0.03846154	0.11099196	1	2146	tags=30%, list=12%, signal=34%
SWEET_KRAS_TARGETS_DN	SWEET_KRAS_TARGETS_DN		49	-0.39794704	-1.5090103	0.016574586	0.11157201	1	2470	tags=31%, list=14%, signal=35%
MARZEC_IL2_SIGNALING_DN	MARZEC_IL2_SIGNALING_DN		31	-0.4392243	-1.5088844	0.024038462	0.11144342	1	3284	tags=42%, list=18%, signal=51%
REACTOME_SHC_RELATED_EVENTS	REACTOME_SHC_RELATED_EVENTS		16	-0.52801085	-1.5076747	0.06315789	0.11206827	1	3012	tags=31%, list=17%, signal=37%
PID_UPA_UPAR_PATHWAY	PID_UPA_UPAR_PATHWAY		27	-0.45296723	-1.5073497	0.038910504	0.112052046	1	174	tags=15%, list=1%, signal=15%
MISHRA_CARCINOMA_ASSOCIATED_FIBROBLAST_UP	MISHRA_CARCINOMA_ASSOCIATED_FIBROBLAST_UP		20	-0.49905223	-1.5068108	0.041353382	0.11222446	1	1211	tags=45%, list=7%, signal=48%
KEGG_NUCLEOTIDE_EXCISION_REPAIR	KEGG_NUCLEOTIDE_EXCISION_REPAIR		43	-0.41047263	-1.5060475	0.01604278	0.11251515	1	4184	tags=42%, list=23%, signal=54%
LENAOUR_DENDRITIC_CELL_MATURATION_DN	LENAOUR_DENDRITIC_CELL_MATURATION_DN		97	-0.34354118	-1.5046449	0.009345794	0.113174595	1	3004	tags=32%, list=17%, signal=38%
VANTVEER_BREAST_CANCER_ESR1_DN	VANTVEER_BREAST_CANCER_ESR1_DN		196	-0.31751406	-1.5022163	0	0.114688866	1	3051	tags=33%, list=17%, signal=39%
TONKS_TARGETS_OF_RUNX1_RUNX1T1_FUSION_HSC_UP	TONKS_TARGETS_OF_RUNX1_RUNX1T1_FUSION_HSC_UP		162	-0.31711543	-1.5004164	0	0.11568916	1	2439	tags=30%, list=14%, signal=35%
KIM_HYPOXIA	KIM_HYPOXIA		23	-0.4717001	-1.5002866	0.01831502	0.11554842	1	4159	tags=65%, list=23%, signal=85%
PARK_HSC_VS_MULTIPOTENT_PROGENITORS_DN	PARK_HSC_VS_MULTIPOTENT_PROGENITORS_DN		15	-0.53518295	-1.4997427	0.043165468	0.11575342	1	2807	tags=47%, list=16%, signal=55%
GHO_ATF5_TARGETS_DN	GHO_ATF5_TARGETS_DN		16	-0.5021757	-1.4992783	0.053956833	0.115890056	1	3637	tags=63%, list=20%, signal=78%
REACTOME_TCR_SIGNALING	REACTOME_TCR_SIGNALING		37	-0.43720388	-1.4975665	0.033333335	0.11690263	1	2294	tags=19%, list=13%, signal=22%
REACTOME_DNA_REPAIR	REACTOME_DNA_REPAIR		101	-0.3402314	-1.4957417	0	0.11812501	1	4030	tags=36%, list=22%, signal=46%
SAKAI_CHRONIC_HEPATITIS_VS_LIVER_CANCER_UP	SAKAI_CHRONIC_HEPATITIS_VS_LIVER_CANCER_UP		74	-0.36727256	-1.4954304	0.0078125	0.11808933	1	3772	tags=38%, list=21%, signal=48%
SEIDEN_MET_SIGNALING	SEIDEN_MET_SIGNALING		18	-0.50447774	-1.4952955	0.05597015	0.117931314	1	3939	tags=56%, list=22%, signal=71%
DAIRKEE_CANCER_PRONE_RESPONSE_BPA_E2	DAIRKEE_CANCER_PRONE_RESPONSE_BPA_E2		105	-0.3375592	-1.4945673	0.010416667	0.11823812	1	3255	tags=30%, list=18%, signal=37%
REACTOME_RAP1_SIGNALLING	REACTOME_RAP1_SIGNALLING		15	-0.5170609	-1.4934996	0.07823129	0.11891045	1	552	tags=27%, list=3%, signal=27%
NOJIMA_SFRP2_TARGETS_DN	NOJIMA_SFRP2_TARGETS_DN		19	-0.49594048	-1.4927227	0.047272727	0.11930302	1	1953	tags=37%, list=11%, signal=41%
WINTER_HYPOXIA_UP	WINTER_HYPOXIA_UP		85	-0.3638666	-1.4921097	0	0.11957297	1	3900	tags=44%, list=22%, signal=55%
DASU_IL6_SIGNALING_SCAR_UP	DASU_IL6_SIGNALING_SCAR_UP		27	-0.4641237	-1.4914385	0.030303031	0.12000279	1	2812	tags=37%, list=16%, signal=44%
LUI_THYROID_CANCER_PAX8_PPARG_UP	LUI_THYROID_CANCER_PAX8_PPARG_UP		41	-0.41059718	-1.4914218	0.026455026	0.11977287	1	3072	tags=37%, list=17%, signal=44%
CHIARETTI_T_ALL_REFRACTORY_TO_THERAPY	CHIARETTI_T_ALL_REFRACTORY_TO_THERAPY		21	-0.47279483	-1.4910889	0.045081966	0.11976843	1	3978	tags=62%, list=22%, signal=79%
NAKAYAMA_SOFT_TISSUE_TUMORS_PCA2_DN	NAKAYAMA_SOFT_TISSUE_TUMORS_PCA2_DN		47	-0.40904728	-1.4896888	0.015544041	0.1207032	1	1048	tags=21%, list=6%, signal=23%
BENPORATH_MYC_TARGETS_WITH_EBOX	BENPORATH_MYC_TARGETS_WITH_EBOX		209	-0.3208037	-1.488869	0	0.12105665	1	4173	tags=38%, list=23%, signal=49%
REACTOME_REGULATION_OF_APOPTOSIS	REACTOME_REGULATION_OF_APOPTOSIS		54	-0.38591582	-1.4883616	0.015228426	0.121227376	1	5245	tags=59%, list=29%, signal=83%
NAKAMURA_CANCER_MICROENVIRONMENT_DN	NAKAMURA_CANCER_MICROENVIRONMENT_DN		42	-0.40847075	-1.4882388	0.022099448	0.121053435	1	2994	tags=45%, list=17%, signal=54%
BOYLAN_MULTIPLE_MYELOMA_C_CLUSTER_UP	BOYLAN_MULTIPLE_MYELOMA_C_CLUSTER_UP		35	-0.42703694	-1.4878999	0.032388665	0.121073544	1	3972	tags=46%, list=22%, signal=59%
PID_MYC_ACTIV_PATHWAY	PID_MYC_ACTIV_PATHWAY		76	-0.3610978	-1.4843116	0.015267176	0.12364081	1	4401	tags=43%, list=24%, signal=57%
COLLER_MYC_TARGETS_UP	COLLER_MYC_TARGETS_UP		24	-0.46560022	-1.4835902	0.04680851	0.124014735	1	3004	tags=38%, list=17%, signal=45%
CAFFAREL_RESPONSE_TO_THC_24HR_5_UP	CAFFAREL_RESPONSE_TO_THC_24HR_5_UP		30	-0.43818006	-1.4813366	0.024691358	0.1256453	1	3301	tags=43%, list=18%, signal=53%
HOQUE_METHYLATED_IN_CANCER	HOQUE_METHYLATED_IN_CANCER		41	-0.40125763	-1.4812425	0.010362694	0.12544644	1	2233	tags=27%, list=12%, signal=31%
PID_RHOA_REG_PATHWAY	PID_RHOA_REG_PATHWAY		40	-0.40891042	-1.4800959	0.025252525	0.12617147	1	2617	tags=30%, list=15%, signal=35%
RIGGINS_TAMOXIFEN_RESISTANCE_DN	RIGGINS_TAMOXIFEN_RESISTANCE_DN		195	-0.32172245	-1.4790024	0	0.12658997	1	3104	tags=32%, list=17%, signal=38%
SIG_CHEMOTAXIS	SIG_CHEMOTAXIS		41	-0.41100442	-1.4760001	0.021978023	0.12893547	1	3631	tags=41%, list=20%, signal=52%
REACTOME_REGULATION_OF_ORNITHINE_DECARBOXYLASE_ODC	REACTOME_REGULATION_OF_ORNITHINE_DECARBOXYLASE_ODC		47	-0.39741075	-1.4759448	0.037037037	0.12871951	1	5245	tags=64%, list=29%, signal=90%
MEISSNER_BRAIN_HCP_WITH_H3K27ME3	MEISSNER_BRAIN_HCP_WITH_H3K27ME3		141	-0.33103216	-1.4755436	0	0.12874301	1	1939	tags=26%, list=11%, signal=28%
TAVOR_CEBPA_TARGETS_UP	TAVOR_CEBPA_TARGETS_UP		37	-0.41733572	-1.4747386	0.023364486	0.12929326	1	3295	tags=43%, list=18%, signal=53%
CHANDRAN_METASTASIS_TOP50_UP	CHANDRAN_METASTASIS_TOP50_UP		34	-0.4204552	-1.4743209	0.035532996	0.12942491	1	3993	tags=41%, list=22%, signal=53%
HAN_SATB1_TARGETS_UP	HAN_SATB1_TARGETS_UP		343	-0.29444754	-1.4732825	0	0.13010262	1	1979	tags=22%, list=11%, signal=24%
SIMBULAN_PARP1_TARGETS_DN	SIMBULAN_PARP1_TARGETS_DN		16	-0.50876826	-1.4713234	0.07823129	0.13143042	1	3301	tags=69%, list=18%, signal=84%
TSENG_ADIPOGENIC_POTENTIAL_UP	TSENG_ADIPOGENIC_POTENTIAL_UP		23	-0.44528732	-1.4687544	0.042471044	0.13328597	1	1533	tags=30%, list=8%, signal=33%
CHIBA_RESPONSE_TO_TSA_DN	CHIBA_RESPONSE_TO_TSA_DN		21	-0.49206325	-1.4687397	0.033834588	0.1330335	1	2924	tags=48%, list=16%, signal=57%
REACTOME_ARMS_MEDIATED_ACTIVATION	REACTOME_ARMS_MEDIATED_ACTIVATION		16	-0.4999831	-1.4683559	0.057761732	0.13308693	1	3012	tags=38%, list=17%, signal=45%
KIM_LRRC3B_TARGETS	KIM_LRRC3B_TARGETS		22	-0.47184476	-1.4674885	0.03846154	0.13362882	1	4047	tags=55%, list=22%, signal=70%
PID_ATM_PATHWAY	PID_ATM_PATHWAY		34	-0.41638237	-1.466775	0.03211009	0.13384248	1	4077	tags=32%, list=23%, signal=42%
XU_HGF_TARGETS_INDUCED_BY_AKT1_48HR_DN	XU_HGF_TARGETS_INDUCED_BY_AKT1_48HR_DN		24	-0.4533423	-1.4667209	0.051948052	0.13362795	1	1223	tags=33%, list=7%, signal=36%
XU_HGF_SIGNALING_NOT_VIA_AKT1_6HR	XU_HGF_SIGNALING_NOT_VIA_AKT1_6HR		25	-0.4625962	-1.466112	0.043824703	0.13392837	1	2572	tags=40%, list=14%, signal=47%
REACTOME_AMINE_LIGAND_BINDING_RECEPTORS	REACTOME_AMINE_LIGAND_BINDING_RECEPTORS		19	-0.49381274	-1.4660493	0.045801528	0.13371289	1	339	tags=21%, list=2%, signal=21%
PID_FAK_PATHWAY	PID_FAK_PATHWAY		56	-0.38331786	-1.4655056	0.022346368	0.13391466	1	3119	tags=23%, list=17%, signal=28%
SHAFFER_IRF4_TARGETS_IN_ACTIVATED_B_LYMPHOCYTE	SHAFFER_IRF4_TARGETS_IN_ACTIVATED_B_LYMPHOCYTE		74	-0.35658893	-1.4647149	0.0078125	0.13429396	1	2315	tags=24%, list=13%, signal=28%
BARIS_THYROID_CANCER_DN	BARIS_THYROID_CANCER_DN		51	-0.38452527	-1.4640404	0.031914894	0.13459074	1	1748	tags=22%, list=10%, signal=24%
CUI_TCF21_TARGETS_2_UP	CUI_TCF21_TARGETS_2_UP		388	-0.28290507	-1.4633412	0	0.1349054	1	2914	tags=34%, list=16%, signal=39%
KOKKINAKIS_METHIONINE_DEPRIVATION_96HR_DN	KOKKINAKIS_METHIONINE_DEPRIVATION_96HR_DN		70	-0.35065067	-1.4609331	0.006666667	0.1367593	1	2460	tags=31%, list=14%, signal=36%
FLOTHO_PEDIATRIC_ALL_THERAPY_RESPONSE_DN	FLOTHO_PEDIATRIC_ALL_THERAPY_RESPONSE_DN		24	-0.45202884	-1.4605142	0.0390625	0.13682395	1	3237	tags=50%, list=18%, signal=61%
REACTOME_IL1_SIGNALING	REACTOME_IL1_SIGNALING		38	-0.40893188	-1.4604282	0.03723404	0.13661282	1	4184	tags=45%, list=23%, signal=58%
HADDAD_T_LYMPHOCYTE_AND_NK_PROGENITOR_DN	HADDAD_T_LYMPHOCYTE_AND_NK_PROGENITOR_DN		28	-0.4438775	-1.4602832	0.03255814	0.13648623	1	2639	tags=50%, list=15%, signal=58%
VARELA_ZMPSTE24_TARGETS_DN	VARELA_ZMPSTE24_TARGETS_DN		25	-0.4461339	-1.4596263	0.029045643	0.13682263	1	1245	tags=20%, list=7%, signal=21%
BURTON_ADIPOGENESIS_PEAK_AT_8HR	BURTON_ADIPOGENESIS_PEAK_AT_8HR		36	-0.42664117	-1.4579146	0.025641026	0.13805716	1	3827	tags=39%, list=21%, signal=49%
SLEBOS_HEAD_AND_NECK_CANCER_WITH_HPV_UP	SLEBOS_HEAD_AND_NECK_CANCER_WITH_HPV_UP		74	-0.35563657	-1.4559076	0.007462686	0.13962519	1	2822	tags=41%, list=16%, signal=48%
JAZAG_TGFB1_SIGNALING_UP	JAZAG_TGFB1_SIGNALING_UP		89	-0.3498617	-1.4556307	0	0.13962248	1	2921	tags=27%, list=16%, signal=32%
SIG_REGULATION_OF_THE_ACTIN_CYTOSKELETON_BY_RHO_GTPASES	SIG_REGULATION_OF_THE_ACTIN_CYTOSKELETON_BY_RHO_GTPASES		31	-0.4249697	-1.4553663	0.040723983	0.13962783	1	3159	tags=32%, list=18%, signal=39%
BONOME_OVARIAN_CANCER_POOR_SURVIVAL_UP	BONOME_OVARIAN_CANCER_POOR_SURVIVAL_UP		29	-0.4288255	-1.4551357	0.014150944	0.13954389	1	1327	tags=17%, list=7%, signal=19%
ZHU_CMV_24_HR_UP	ZHU_CMV_24_HR_UP		90	-0.34412333	-1.4545256	0.016666668	0.13974711	1	3819	tags=39%, list=21%, signal=49%
PID_ERBB1_INTERNALIZATION_PATHWAY	PID_ERBB1_INTERNALIZATION_PATHWAY		39	-0.3913222	-1.4537736	0.011173184	0.14013329	1	3012	tags=28%, list=17%, signal=34%
BYSTROEM_CORRELATED_WITH_IL5_UP	BYSTROEM_CORRELATED_WITH_IL5_UP		39	-0.40127665	-1.4525626	0.029268293	0.14102417	1	2488	tags=26%, list=14%, signal=30%
SNIJDERS_AMPLIFIED_IN_HEAD_AND_NECK_TUMORS	SNIJDERS_AMPLIFIED_IN_HEAD_AND_NECK_TUMORS		35	-0.42186287	-1.4516423	0.048780486	0.14161219	1	2778	tags=34%, list=15%, signal=40%
FERNANDEZ_BOUND_BY_MYC	FERNANDEZ_BOUND_BY_MYC		160	-0.3188021	-1.45149	0	0.14153385	1	3481	tags=31%, list=19%, signal=38%
CHIANG_LIVER_CANCER_SUBCLASS_UNANNOTATED_DN	CHIANG_LIVER_CANCER_SUBCLASS_UNANNOTATED_DN		184	-0.3134572	-1.4509242	0	0.14162686	1	3759	tags=32%, list=21%, signal=39%
BARRIER_COLON_CANCER_RECURRENCE_UP	BARRIER_COLON_CANCER_RECURRENCE_UP		39	-0.39654702	-1.4486954	0.026041666	0.14336994	1	2716	tags=23%, list=15%, signal=27%
SU_TESTIS	SU_TESTIS		58	-0.37313634	-1.4474839	0.030674847	0.1440909	1	2729	tags=38%, list=15%, signal=45%
PID_SYNDECAN_4_PATHWAY	PID_SYNDECAN_4_PATHWAY		27	-0.44883057	-1.44537	0.050847456	0.14564621	1	2122	tags=30%, list=12%, signal=34%
MANTOVANI_VIRAL_GPCR_SIGNALING_DN	MANTOVANI_VIRAL_GPCR_SIGNALING_DN		39	-0.38897526	-1.4452317	0.026455026	0.1455203	1	3101	tags=33%, list=17%, signal=40%
VERHAAK_GLIOBLASTOMA_MESENCHYMAL	VERHAAK_GLIOBLASTOMA_MESENCHYMAL		179	-0.30599186	-1.4451064	0	0.1453925	1	1670	tags=24%, list=9%, signal=26%
KLEIN_PRIMARY_EFFUSION_LYMPHOMA_UP	KLEIN_PRIMARY_EFFUSION_LYMPHOMA_UP		44	-0.41184643	-1.4445428	0.036082473	0.14557321	1	3645	tags=32%, list=20%, signal=40%
WUNDER_INFLAMMATORY_RESPONSE_AND_CHOLESTEROL_UP	WUNDER_INFLAMMATORY_RESPONSE_AND_CHOLESTEROL_UP		38	-0.42186219	-1.4439404	0.016129032	0.14584784	1	3311	tags=39%, list=18%, signal=48%
ZHAN_MULTIPLE_MYELOMA_SUBGROUPS	ZHAN_MULTIPLE_MYELOMA_SUBGROUPS		30	-0.43141463	-1.4421879	0.044843048	0.1471618	1	5155	tags=50%, list=29%, signal=70%
PID_FRA_PATHWAY	PID_FRA_PATHWAY		34	-0.41679347	-1.4415536	0.03652968	0.14752044	1	743	tags=18%, list=4%, signal=18%
SMID_BREAST_CANCER_RELAPSE_IN_BONE_DN	SMID_BREAST_CANCER_RELAPSE_IN_BONE_DN		229	-0.30464366	-1.4413519	0	0.1473966	1	2899	tags=26%, list=16%, signal=31%
AMIT_EGF_RESPONSE_480_HELA	AMIT_EGF_RESPONSE_480_HELA		152	-0.31699672	-1.4381143	0	0.15012111	1	3504	tags=36%, list=19%, signal=45%
THEILGAARD_NEUTROPHIL_AT_SKIN_WOUND_UP	THEILGAARD_NEUTROPHIL_AT_SKIN_WOUND_UP		63	-0.3562794	-1.4370147	0.01898734	0.15096977	1	4433	tags=41%, list=25%, signal=55%
ABRAHAM_ALPC_VS_MULTIPLE_MYELOMA_DN	ABRAHAM_ALPC_VS_MULTIPLE_MYELOMA_DN		19	-0.47348094	-1.4363003	0.060728744	0.15139593	1	4607	tags=58%, list=26%, signal=78%
PEDERSEN_METASTASIS_BY_ERBB2_ISOFORM_1	PEDERSEN_METASTASIS_BY_ERBB2_ISOFORM_1		37	-0.39836636	-1.4357684	0.021276595	0.151637	1	893	tags=27%, list=5%, signal=28%
REACTOME_HIV_INFECTION	REACTOME_HIV_INFECTION		182	-0.3135002	-1.435426	0	0.15169406	1	5245	tags=45%, list=29%, signal=62%
XU_HGF_SIGNALING_NOT_VIA_AKT1_48HR_UP	XU_HGF_SIGNALING_NOT_VIA_AKT1_48HR_UP		33	-0.4148191	-1.4350494	0.048672568	0.15170632	1	2495	tags=42%, list=14%, signal=49%
MEISSNER_NPC_ICP_WITH_H3_UNMETHYLATED	MEISSNER_NPC_ICP_WITH_H3_UNMETHYLATED		17	-0.49967444	-1.4341143	0.059859157	0.1522924	1	108	tags=12%, list=1%, signal=12%
HELLER_HDAC_TARGETS_SILENCED_BY_METHYLATION_UP	HELLER_HDAC_TARGETS_SILENCED_BY_METHYLATION_UP		396	-0.27719337	-1.4317933	0	0.15412551	1	1695	tags=20%, list=9%, signal=22%
NAKAMURA_METASTASIS	NAKAMURA_METASTASIS		40	-0.4015475	-1.4314922	0.022222223	0.15411644	1	2399	tags=25%, list=13%, signal=29%
PID_IL8_CXCR2_PATHWAY	PID_IL8_CXCR2_PATHWAY		28	-0.43437293	-1.4308208	0.04819277	0.15452263	1	2745	tags=32%, list=15%, signal=38%
GNATENKO_PLATELET_SIGNATURE	GNATENKO_PLATELET_SIGNATURE		40	-0.3932789	-1.430482	0.049689442	0.15455708	1	1490	tags=23%, list=8%, signal=24%
KEGG_PROGESTERONE_MEDIATED_OOCYTE_MATURATION	KEGG_PROGESTERONE_MEDIATED_OOCYTE_MATURATION		74	-0.35020745	-1.4293872	0.023076924	0.15528081	1	3670	tags=42%, list=20%, signal=52%
HELLER_HDAC_TARGETS_UP	HELLER_HDAC_TARGETS_UP		288	-0.28634587	-1.4286567	0	0.1557085	1	2607	tags=30%, list=14%, signal=34%
ZHENG_RESPONSE_TO_ARSENITE_DN	ZHENG_RESPONSE_TO_ARSENITE_DN		15	-0.5033442	-1.427406	0.08301887	0.15670638	1	1064	tags=27%, list=6%, signal=28%
ELVIDGE_HIF1A_TARGETS_DN	ELVIDGE_HIF1A_TARGETS_DN		83	-0.3388573	-1.4249837	0.007518797	0.15866603	1	1485	tags=24%, list=8%, signal=26%
HELLER_SILENCED_BY_METHYLATION_UP	HELLER_SILENCED_BY_METHYLATION_UP		213	-0.29589057	-1.4220248	0	0.16123836	1	1763	tags=24%, list=10%, signal=27%
MODY_HIPPOCAMPUS_PRENATAL	MODY_HIPPOCAMPUS_PRENATAL		40	-0.4022356	-1.4208981	0.03902439	0.1620206	1	3355	tags=40%, list=19%, signal=49%
AMIT_DELAYED_EARLY_GENES	AMIT_DELAYED_EARLY_GENES		18	-0.47010505	-1.418447	0.08243728	0.16428095	1	4313	tags=56%, list=24%, signal=73%
TARTE_PLASMA_CELL_VS_B_LYMPHOCYTE_DN	TARTE_PLASMA_CELL_VS_B_LYMPHOCYTE_DN		26	-0.42965513	-1.4181594	0.057142857	0.16425489	1	2509	tags=38%, list=14%, signal=45%
BAELDE_DIABETIC_NEPHROPATHY_UP	BAELDE_DIABETIC_NEPHROPATHY_UP		58	-0.36619377	-1.4174367	0.025477707	0.16468558	1	1140	tags=22%, list=6%, signal=24%
RAMASWAMY_METASTASIS_DN	RAMASWAMY_METASTASIS_DN		48	-0.3716096	-1.4173675	0.055214725	0.16444333	1	1956	tags=23%, list=11%, signal=26%
SENESE_HDAC1_TARGETS_UP	SENESE_HDAC1_TARGETS_UP		403	-0.27528775	-1.4172789	0	0.16424136	1	3004	tags=27%, list=17%, signal=31%
TAKEDA_TARGETS_OF_NUP98_HOXA9_FUSION_10D_UP	TAKEDA_TARGETS_OF_NUP98_HOXA9_FUSION_10D_UP		135	-0.30849996	-1.4157982	0	0.16561915	1	2641	tags=31%, list=15%, signal=36%
GEORGANTAS_HSC_MARKERS	GEORGANTAS_HSC_MARKERS		51	-0.37144348	-1.4149941	0.044444446	0.16624023	1	2428	tags=41%, list=13%, signal=47%
ZHONG_RESPONSE_TO_AZACITIDINE_AND_TSA_DN	ZHONG_RESPONSE_TO_AZACITIDINE_AND_TSA_DN		66	-0.3517595	-1.4142346	0.026143791	0.16661577	1	2298	tags=26%, list=13%, signal=29%
RAHMAN_TP53_TARGETS_PHOSPHORYLATED	RAHMAN_TP53_TARGETS_PHOSPHORYLATED		21	-0.4504388	-1.412977	0.07112971	0.16746728	1	5049	tags=62%, list=28%, signal=86%
WALLACE_PROSTATE_CANCER_RACE_UP	WALLACE_PROSTATE_CANCER_RACE_UP		179	-0.304327	-1.4116701	0	0.16849554	1	2303	tags=30%, list=13%, signal=34%
KAN_RESPONSE_TO_ARSENIC_TRIOXIDE	KAN_RESPONSE_TO_ARSENIC_TRIOXIDE		107	-0.32780686	-1.4106557	0	0.16911198	1	2629	tags=39%, list=15%, signal=46%
NAKAJIMA_MAST_CELL	NAKAJIMA_MAST_CELL		33	-0.40676665	-1.4104558	0.04587156	0.16902468	1	910	tags=21%, list=5%, signal=22%
LIU_BREAST_CANCER	LIU_BREAST_CANCER		20	-0.4587316	-1.4103876	0.09055118	0.16879965	1	3077	tags=45%, list=17%, signal=54%
ABBUD_LIF_SIGNALING_1_DN	ABBUD_LIF_SIGNALING_1_DN		22	-0.44837183	-1.410336	0.07438017	0.16857366	1	1787	tags=36%, list=10%, signal=40%
REACTOME_PROLONGED_ERK_ACTIVATION_EVENTS	REACTOME_PROLONGED_ERK_ACTIVATION_EVENTS		18	-0.47053635	-1.4103332	0.06934307	0.1682845	1	3012	tags=33%, list=17%, signal=40%
QI_PLASMACYTOMA_UP	QI_PLASMACYTOMA_UP		186	-0.31053963	-1.4098824	0	0.16848215	1	2845	tags=31%, list=16%, signal=37%
ZHAN_EARLY_DIFFERENTIATION_GENES_DN	ZHAN_EARLY_DIFFERENTIATION_GENES_DN		32	-0.4038799	-1.4094385	0.055045873	0.16861166	1	3022	tags=38%, list=17%, signal=45%
KEGG_PYRIMIDINE_METABOLISM	KEGG_PYRIMIDINE_METABOLISM		90	-0.33663568	-1.4087234	0.009090909	0.16903313	1	3481	tags=31%, list=19%, signal=38%
PID_IL1_PATHWAY	PID_IL1_PATHWAY		33	-0.42082965	-1.4069558	0.060185187	0.17063232	1	3877	tags=42%, list=21%, signal=54%
ELVIDGE_HYPOXIA_BY_DMOG_UP	ELVIDGE_HYPOXIA_BY_DMOG_UP		121	-0.31723726	-1.4066058	0	0.17069413	1	1533	tags=24%, list=8%, signal=26%
KEGG_VEGF_SIGNALING_PATHWAY	KEGG_VEGF_SIGNALING_PATHWAY		60	-0.35095832	-1.405945	0.02112676	0.17104997	1	3012	tags=28%, list=17%, signal=34%
GERHOLD_ADIPOGENESIS_UP	GERHOLD_ADIPOGENESIS_UP		42	-0.38376155	-1.405586	0.03626943	0.17112866	1	3129	tags=33%, list=17%, signal=40%
TURASHVILI_BREAST_DUCTAL_CARCINOMA_VS_DUCTAL_NORMAL_DN	TURASHVILI_BREAST_DUCTAL_CARCINOMA_VS_DUCTAL_NORMAL_DN		136	-0.31754217	-1.4054359	0	0.17103368	1	1232	tags=19%, list=7%, signal=20%
BILANGES_SERUM_SENSITIVE_VIA_TSC1	BILANGES_SERUM_SENSITIVE_VIA_TSC1		18	-0.4934584	-1.4054356	0.041198503	0.17074478	1	2867	tags=39%, list=16%, signal=46%
DAVICIONI_PAX_FOXO1_SIGNATURE_IN_ARMS_UP	DAVICIONI_PAX_FOXO1_SIGNATURE_IN_ARMS_UP		53	-0.36812314	-1.4048488	0.044444446	0.17105421	1	2410	tags=38%, list=13%, signal=43%
GAZDA_DIAMOND_BLACKFAN_ANEMIA_PROGENITOR_DN	GAZDA_DIAMOND_BLACKFAN_ANEMIA_PROGENITOR_DN		60	-0.35002226	-1.4036679	0.01863354	0.17183612	1	2385	tags=23%, list=13%, signal=27%
GHANDHI_DIRECT_IRRADIATION_UP	GHANDHI_DIRECT_IRRADIATION_UP		82	-0.34156775	-1.4005913	0.023076924	0.17476048	1	1913	tags=28%, list=11%, signal=31%
PID_TRAIL_PATHWAY	PID_TRAIL_PATHWAY		27	-0.41816416	-1.3988892	0.065789476	0.17610501	1	3112	tags=33%, list=17%, signal=40%
ONDER_CDH1_TARGETS_1_DN	ONDER_CDH1_TARGETS_1_DN		135	-0.31635863	-1.396916	0.013157895	0.1780453	1	3838	tags=42%, list=21%, signal=53%
ODONNELL_METASTASIS_DN	ODONNELL_METASTASIS_DN		19	-0.4680019	-1.3958101	0.097122304	0.17903583	1	1538	tags=37%, list=9%, signal=40%
REACTOME_METABOLISM_OF_NON_CODING_RNA	REACTOME_METABOLISM_OF_NON_CODING_RNA		48	-0.3647423	-1.3952409	0.035532996	0.17935382	1	3687	tags=38%, list=20%, signal=47%
ST_INTEGRIN_SIGNALING_PATHWAY	ST_INTEGRIN_SIGNALING_PATHWAY		79	-0.33623394	-1.3946539	0.025	0.17967613	1	3670	tags=37%, list=20%, signal=46%
REACTOME_MRNA_SPLICING	REACTOME_MRNA_SPLICING		106	-0.31310636	-1.3915391	0.020408163	0.18275505	1	4242	tags=38%, list=24%, signal=49%
REACTOME_GASTRIN_CREB_SIGNALLING_PATHWAY_VIA_PKC_AND_MAPK	REACTOME_GASTRIN_CREB_SIGNALLING_PATHWAY_VIA_PKC_AND_MAPK		129	-0.3125186	-1.3910923	0.02631579	0.18287863	1	3075	tags=30%, list=17%, signal=36%
REACTOME_PROCESSING_OF_CAPPED_INTRONLESS_PRE_MRNA	REACTOME_PROCESSING_OF_CAPPED_INTRONLESS_PRE_MRNA		23	-0.43471444	-1.3898283	0.071428575	0.18391393	1	4852	tags=57%, list=27%, signal=77%
KEGG_BASE_EXCISION_REPAIR	KEGG_BASE_EXCISION_REPAIR		33	-0.4092984	-1.3895609	0.076595746	0.18383121	1	3413	tags=36%, list=19%, signal=45%
CHIANG_LIVER_CANCER_SUBCLASS_CTNNB1_UP	CHIANG_LIVER_CANCER_SUBCLASS_CTNNB1_UP		133	-0.31615907	-1.3891513	0	0.18407701	1	1412	tags=21%, list=8%, signal=23%
LAIHO_COLORECTAL_CANCER_SERRATED_UP	LAIHO_COLORECTAL_CANCER_SERRATED_UP		104	-0.32185635	-1.3886095	0	0.18434408	1	4898	tags=45%, list=27%, signal=62%
PHONG_TNF_RESPONSE_NOT_VIA_P38	PHONG_TNF_RESPONSE_NOT_VIA_P38		324	-0.2787542	-1.3884244	0	0.18427138	1	2423	tags=26%, list=13%, signal=29%
KEGG_GLYCOLYSIS_GLUCONEOGENESIS	KEGG_GLYCOLYSIS_GLUCONEOGENESIS		43	-0.38355255	-1.3867928	0.0625	0.18576567	1	3003	tags=33%, list=17%, signal=39%
NAKAMURA_METASTASIS_MODEL_UP	NAKAMURA_METASTASIS_MODEL_UP		34	-0.40472612	-1.3863177	0.05392157	0.18604481	1	1996	tags=21%, list=11%, signal=23%
DAZARD_RESPONSE_TO_UV_NHEK_DN	DAZARD_RESPONSE_TO_UV_NHEK_DN		304	-0.28555635	-1.3860683	0	0.1860145	1	2954	tags=25%, list=16%, signal=29%
KEGG_PANCREATIC_CANCER	KEGG_PANCREATIC_CANCER		67	-0.35305557	-1.3855535	0.044585988	0.18625315	1	4348	tags=48%, list=24%, signal=63%
KEGG_OOCYTE_MEIOSIS	KEGG_OOCYTE_MEIOSIS		95	-0.32409352	-1.3854674	0.018181818	0.18605135	1	2902	tags=32%, list=16%, signal=37%
FLECHNER_PBL_KIDNEY_TRANSPLANT_REJECTED_VS_OK_UP	FLECHNER_PBL_KIDNEY_TRANSPLANT_REJECTED_VS_OK_UP		62	-0.35108528	-1.3850813	0.03773585	0.18619733	1	3950	tags=39%, list=22%, signal=49%
AMUNDSON_POOR_SURVIVAL_AFTER_GAMMA_RADIATION_2G	AMUNDSON_POOR_SURVIVAL_AFTER_GAMMA_RADIATION_2G		150	-0.30808267	-1.3848224	0.04225352	0.18617529	1	3347	tags=33%, list=19%, signal=40%
OHM_METHYLATED_IN_ADULT_CANCERS	OHM_METHYLATED_IN_ADULT_CANCERS		22	-0.44321308	-1.383537	0.079422385	0.18732212	1	804	tags=18%, list=4%, signal=19%
RIZ_ERYTHROID_DIFFERENTIATION_CCNE1	RIZ_ERYTHROID_DIFFERENTIATION_CCNE1		36	-0.39446247	-1.3834478	0.06635071	0.18713132	1	2160	tags=25%, list=12%, signal=28%
HIRSCH_CELLULAR_TRANSFORMATION_SIGNATURE_UP	HIRSCH_CELLULAR_TRANSFORMATION_SIGNATURE_UP		220	-0.2902962	-1.3832793	0	0.1869972	1	2867	tags=26%, list=16%, signal=31%
PYEON_HPV_POSITIVE_TUMORS_UP	PYEON_HPV_POSITIVE_TUMORS_UP		83	-0.33306164	-1.38252	0.028985508	0.18743017	1	2823	tags=37%, list=16%, signal=44%
RASHI_RESPONSE_TO_IONIZING_RADIATION_4	RASHI_RESPONSE_TO_IONIZING_RADIATION_4		53	-0.36883596	-1.3817964	0.03409091	0.18789646	1	2990	tags=32%, list=17%, signal=38%
NEMETH_INFLAMMATORY_RESPONSE_LPS_DN	NEMETH_INFLAMMATORY_RESPONSE_LPS_DN		30	-0.39223146	-1.3808928	0.06763285	0.18849479	1	2992	tags=43%, list=17%, signal=52%
WEST_ADRENOCORTICAL_CARCINOMA_VS_ADENOMA_DN	WEST_ADRENOCORTICAL_CARCINOMA_VS_ADENOMA_DN		19	-0.4575589	-1.3806813	0.08301887	0.18836601	1	1349	tags=26%, list=7%, signal=28%
DOANE_BREAST_CANCER_ESR1_DN	DOANE_BREAST_CANCER_ESR1_DN		26	-0.4320409	-1.3802665	0.067669176	0.18848923	1	1921	tags=31%, list=11%, signal=34%
SPIELMAN_LYMPHOBLAST_EUROPEAN_VS_ASIAN_UP	SPIELMAN_LYMPHOBLAST_EUROPEAN_VS_ASIAN_UP		453	-0.26553106	-1.3789126	0	0.18973885	1	3450	tags=26%, list=19%, signal=31%
KEGG_GLYCINE_SERINE_AND_THREONINE_METABOLISM	KEGG_GLYCINE_SERINE_AND_THREONINE_METABOLISM		24	-0.4454233	-1.3786736	0.07239819	0.18972605	1	1083	tags=21%, list=6%, signal=22%
WANG_RECURRENT_LIVER_CANCER_UP	WANG_RECURRENT_LIVER_CANCER_UP		20	-0.4560891	-1.3784851	0.105882354	0.18964227	1	2572	tags=45%, list=14%, signal=52%
ROSS_ACUTE_MYELOID_LEUKEMIA_CBF	ROSS_ACUTE_MYELOID_LEUKEMIA_CBF		73	-0.32902005	-1.3769722	0.03649635	0.19089456	1	1668	tags=23%, list=9%, signal=26%
SA_CASPASE_CASCADE	SA_CASPASE_CASCADE		16	-0.47440624	-1.3767945	0.08778626	0.1907794	1	1936	tags=31%, list=11%, signal=35%
HAHTOLA_CTCL_CUTANEOUS	HAHTOLA_CTCL_CUTANEOUS		19	-0.45476803	-1.3767838	0.094262294	0.19048542	1	692	tags=16%, list=4%, signal=16%
VERHAAK_AML_WITH_NPM1_MUTATED_UP	VERHAAK_AML_WITH_NPM1_MUTATED_UP		116	-0.3134057	-1.3764942	0.022727273	0.19051564	1	2439	tags=31%, list=14%, signal=36%
DELPUECH_FOXO3_TARGETS_DN	DELPUECH_FOXO3_TARGETS_DN		38	-0.3773553	-1.3764844	0.056074765	0.19022332	1	2992	tags=45%, list=17%, signal=54%
BASSO_B_LYMPHOCYTE_NETWORK	BASSO_B_LYMPHOCYTE_NETWORK		131	-0.3106808	-1.3764238	0	0.1899971	1	3631	tags=39%, list=20%, signal=48%
CHOW_RASSF1_TARGETS_UP	CHOW_RASSF1_TARGETS_UP		27	-0.40791818	-1.3746954	0.067510545	0.19177549	1	2451	tags=30%, list=14%, signal=34%
HOFFMANN_IMMATURE_TO_MATURE_B_LYMPHOCYTE_UP	HOFFMANN_IMMATURE_TO_MATURE_B_LYMPHOCYTE_UP		34	-0.40128452	-1.3743439	0.05676856	0.1919112	1	2061	tags=29%, list=11%, signal=33%
SENESE_HDAC2_TARGETS_UP	SENESE_HDAC2_TARGETS_UP		103	-0.3186164	-1.3733073	0	0.19280386	1	3004	tags=31%, list=17%, signal=37%
HIRSCH_CELLULAR_TRANSFORMATION_SIGNATURE_DN	HIRSCH_CELLULAR_TRANSFORMATION_SIGNATURE_DN		97	-0.32272053	-1.3686726	0.026548672	0.19789825	1	3287	tags=34%, list=18%, signal=41%
MARCHINI_TRABECTEDIN_RESISTANCE_UP	MARCHINI_TRABECTEDIN_RESISTANCE_UP		19	-0.4465971	-1.3681217	0.09505703	0.19827808	1	4523	tags=63%, list=25%, signal=84%
SENGUPTA_NASOPHARYNGEAL_CARCINOMA_WITH_LMP1_UP	SENGUPTA_NASOPHARYNGEAL_CARCINOMA_WITH_LMP1_UP		332	-0.28202593	-1.3678217	0	0.1983157	1	2740	tags=26%, list=15%, signal=30%
SCHMIDT_POR_TARGETS_IN_LIMB_BUD_UP	SCHMIDT_POR_TARGETS_IN_LIMB_BUD_UP		25	-0.42265445	-1.3658165	0.065891474	0.20017757	1	4071	tags=60%, list=23%, signal=77%
ROZANOV_MMP14_TARGETS_SUBSET	ROZANOV_MMP14_TARGETS_SUBSET		32	-0.40008494	-1.365638	0.08071749	0.2000375	1	2266	tags=28%, list=13%, signal=32%
HEDENFALK_BREAST_CANCER_HEREDITARY_VS_SPORADIC	HEDENFALK_BREAST_CANCER_HEREDITARY_VS_SPORADIC		46	-0.37024108	-1.3656191	0.057591625	0.19976617	1	3798	tags=33%, list=21%, signal=41%
REACTOME_CELL_DEATH_SIGNALLING_VIA_NRAGE_NRIF_AND_NADE	REACTOME_CELL_DEATH_SIGNALLING_VIA_NRAGE_NRIF_AND_NADE		55	-0.36036238	-1.364748	0.038961038	0.20051478	1	2582	tags=25%, list=14%, signal=30%
BURTON_ADIPOGENESIS_10	BURTON_ADIPOGENESIS_10		28	-0.4095517	-1.3643167	0.06550218	0.20074806	1	4099	tags=50%, list=23%, signal=65%
LEE_METASTASIS_AND_RNA_PROCESSING_UP	LEE_METASTASIS_AND_RNA_PROCESSING_UP		17	-0.46826005	-1.3639476	0.13011153	0.2007869	1	3478	tags=35%, list=19%, signal=44%
REACTOME_HEMOSTASIS	REACTOME_HEMOSTASIS		351	-0.27820507	-1.36387	0	0.20057856	1	2924	tags=26%, list=16%, signal=31%
HOWLIN_CITED1_TARGETS_1_DN	HOWLIN_CITED1_TARGETS_1_DN		28	-0.40354148	-1.3620919	0.064935066	0.20239986	1	3840	tags=54%, list=21%, signal=68%
BENPORATH_ES_2	BENPORATH_ES_2		29	-0.41166484	-1.3612831	0.069565214	0.20308596	1	2647	tags=38%, list=15%, signal=44%
REACTOME_G_ALPHA_Q_SIGNALLING_EVENTS	REACTOME_G_ALPHA_Q_SIGNALLING_EVENTS		109	-0.32562947	-1.3610142	0.039215688	0.20318566	1	2422	tags=25%, list=13%, signal=28%
HESS_TARGETS_OF_HOXA9_AND_MEIS1_UP	HESS_TARGETS_OF_HOXA9_AND_MEIS1_UP		58	-0.35321915	-1.3607621	0.027210884	0.20317729	1	3619	tags=40%, list=20%, signal=49%
CROONQUIST_IL6_DEPRIVATION_UP	CROONQUIST_IL6_DEPRIVATION_UP		16	-0.4788659	-1.356367	0.09195402	0.20797093	1	2079	tags=56%, list=12%, signal=64%
CERIBELLI_GENES_INACTIVE_AND_BOUND_BY_NFY	CERIBELLI_GENES_INACTIVE_AND_BOUND_BY_NFY		27	-0.3964935	-1.3558327	0.055793993	0.20833138	1	295	tags=11%, list=2%, signal=11%
WIERENGA_STAT5A_TARGETS_UP	WIERENGA_STAT5A_TARGETS_UP		168	-0.2962538	-1.3557465	0	0.20811932	1	995	tags=18%, list=6%, signal=19%
REACTOME_POST_CHAPERONIN_TUBULIN_FOLDING_PATHWAY	REACTOME_POST_CHAPERONIN_TUBULIN_FOLDING_PATHWAY		15	-0.48768735	-1.355191	0.125	0.20847456	1	4422	tags=53%, list=25%, signal=71%
KEGG_BLADDER_CANCER	KEGG_BLADDER_CANCER		41	-0.37586042	-1.3540627	0.04945055	0.20945843	1	1556	tags=22%, list=9%, signal=24%
PEDERSEN_METASTASIS_BY_ERBB2_ISOFORM_7	PEDERSEN_METASTASIS_BY_ERBB2_ISOFORM_7		348	-0.26961482	-1.3534538	0	0.2099808	1	2215	tags=26%, list=12%, signal=29%
HADDAD_B_LYMPHOCYTE_PROGENITOR	HADDAD_B_LYMPHOCYTE_PROGENITOR		234	-0.28916916	-1.3530449	0	0.21015994	1	1787	tags=21%, list=10%, signal=22%
BOYLAN_MULTIPLE_MYELOMA_D_DN	BOYLAN_MULTIPLE_MYELOMA_D_DN		61	-0.35597247	-1.3516629	0.070063695	0.21157834	1	2047	tags=30%, list=11%, signal=33%
SMID_BREAST_CANCER_NORMAL_LIKE_UP	SMID_BREAST_CANCER_NORMAL_LIKE_UP		281	-0.2840177	-1.3516473	0	0.21128054	1	1349	tags=19%, list=7%, signal=20%
REACTOME_TOLL_RECEPTOR_CASCADES	REACTOME_TOLL_RECEPTOR_CASCADES		106	-0.31611794	-1.351445	0.011363637	0.21112302	1	4136	tags=35%, list=23%, signal=45%
BOYLAN_MULTIPLE_MYELOMA_D_CLUSTER_DN	BOYLAN_MULTIPLE_MYELOMA_D_CLUSTER_DN		37	-0.38065323	-1.3502561	0.045454547	0.21214128	1	2047	tags=27%, list=11%, signal=30%
RIZKI_TUMOR_INVASIVENESS_2D_UP	RIZKI_TUMOR_INVASIVENESS_2D_UP		60	-0.35158348	-1.3502209	0.056737587	0.21188632	1	857	tags=10%, list=5%, signal=10%
PEDERSEN_TARGETS_OF_611CTF_ISOFORM_OF_ERBB2	PEDERSEN_TARGETS_OF_611CTF_ISOFORM_OF_ERBB2		66	-0.33840024	-1.3500736	0.055555556	0.21175373	1	2215	tags=35%, list=12%, signal=40%
MARSHALL_VIRAL_INFECTION_RESPONSE_DN	MARSHALL_VIRAL_INFECTION_RESPONSE_DN		24	-0.42704824	-1.3496718	0.08943089	0.21199024	1	3301	tags=42%, list=18%, signal=51%
PID_ALK1_PATHWAY	PID_ALK1_PATHWAY		25	-0.41392967	-1.349299	0.07723577	0.21213338	1	874	tags=16%, list=5%, signal=17%
HUANG_GATA2_TARGETS_UP	HUANG_GATA2_TARGETS_UP		118	-0.30352452	-1.3489043	0.011904762	0.21235041	1	3131	tags=34%, list=17%, signal=41%
GRAHAM_CML_QUIESCENT_VS_NORMAL_QUIESCENT_DN	GRAHAM_CML_QUIESCENT_VS_NORMAL_QUIESCENT_DN		31	-0.38620362	-1.3465177	0.08095238	0.21498324	1	2304	tags=35%, list=13%, signal=41%
ZHAN_V2_LATE_DIFFERENTIATION_GENES	ZHAN_V2_LATE_DIFFERENTIATION_GENES		39	-0.37154317	-1.345706	0.060913704	0.21564843	1	4072	tags=44%, list=23%, signal=56%
GENTILE_UV_RESPONSE_CLUSTER_D8	GENTILE_UV_RESPONSE_CLUSTER_D8		39	-0.373572	-1.3455931	0.0913242	0.21547213	1	3713	tags=36%, list=21%, signal=45%
BIOCARTA_ECM_PATHWAY	BIOCARTA_ECM_PATHWAY		22	-0.43525094	-1.3441348	0.110687025	0.2170376	1	3012	tags=41%, list=17%, signal=49%
GUENTHER_GROWTH_SPHERICAL_VS_ADHERENT_DN	GUENTHER_GROWTH_SPHERICAL_VS_ADHERENT_DN		24	-0.41628742	-1.3433247	0.07865169	0.21758077	1	3396	tags=50%, list=19%, signal=62%
PLASARI_TGFB1_TARGETS_10HR_DN	PLASARI_TGFB1_TARGETS_10HR_DN		212	-0.28186882	-1.3429358	0	0.21772966	1	2873	tags=36%, list=16%, signal=43%
BARRIER_CANCER_RELAPSE_NORMAL_SAMPLE_UP	BARRIER_CANCER_RELAPSE_NORMAL_SAMPLE_UP		26	-0.42213702	-1.3418338	0.094262294	0.2187232	1	1682	tags=31%, list=9%, signal=34%
SMITH_LIVER_CANCER	SMITH_LIVER_CANCER		41	-0.3614735	-1.3400768	0.058252428	0.22056668	1	1580	tags=27%, list=9%, signal=29%
BOYAULT_LIVER_CANCER_SUBCLASS_G5_DN	BOYAULT_LIVER_CANCER_SUBCLASS_G5_DN		24	-0.4185346	-1.3397552	0.09881423	0.22066419	1	1835	tags=42%, list=10%, signal=46%
KYNG_ENVIRONMENTAL_STRESS_RESPONSE_NOT_BY_GAMMA_IN_WS	KYNG_ENVIRONMENTAL_STRESS_RESPONSE_NOT_BY_GAMMA_IN_WS		28	-0.39946136	-1.3393247	0.08943089	0.22088248	1	2149	tags=25%, list=12%, signal=28%
CORRE_MULTIPLE_MYELOMA_DN	CORRE_MULTIPLE_MYELOMA_DN		46	-0.35860363	-1.3390623	0.052910052	0.22096193	1	2740	tags=35%, list=15%, signal=41%
RAGHAVACHARI_PLATELET_SPECIFIC_GENES	RAGHAVACHARI_PLATELET_SPECIFIC_GENES		61	-0.34811217	-1.3389081	0.06338028	0.22081587	1	2379	tags=26%, list=13%, signal=30%
KEGG_PROSTATE_CANCER	KEGG_PROSTATE_CANCER		81	-0.3224807	-1.3388556	0.032786883	0.22054231	1	4050	tags=40%, list=22%, signal=51%
LINDGREN_BLADDER_CANCER_HIGH_RECURRENCE	LINDGREN_BLADDER_CANCER_HIGH_RECURRENCE		45	-0.35775635	-1.3384631	0.057291668	0.22070028	1	2047	tags=33%, list=11%, signal=38%
AMIT_EGF_RESPONSE_40_HELA	AMIT_EGF_RESPONSE_40_HELA		41	-0.36368024	-1.338108	0.06735751	0.22079845	1	2445	tags=29%, list=14%, signal=34%
REACTOME_BASE_EXCISION_REPAIR	REACTOME_BASE_EXCISION_REPAIR		18	-0.44976872	-1.3377122	0.11764706	0.22102195	1	4435	tags=44%, list=25%, signal=59%
REACTOME_PROCESSING_OF_CAPPED_INTRON_CONTAINING_PRE_MRNA	REACTOME_PROCESSING_OF_CAPPED_INTRON_CONTAINING_PRE_MRNA		135	-0.29756212	-1.3374045	0	0.22105192	1	4410	tags=39%, list=24%, signal=52%
LI_WILMS_TUMOR	LI_WILMS_TUMOR		18	-0.45932534	-1.3363924	0.108	0.2218621	1	1668	tags=33%, list=9%, signal=37%
MENSE_HYPOXIA_UP	MENSE_HYPOXIA_UP		94	-0.31678265	-1.3362566	0.03409091	0.22171031	1	3664	tags=40%, list=20%, signal=50%
BIOCARTA_ARAP_PATHWAY	BIOCARTA_ARAP_PATHWAY		17	-0.45065272	-1.3361577	0.10992908	0.22150351	1	3331	tags=35%, list=18%, signal=43%
KEGG_SMALL_CELL_LUNG_CANCER	KEGG_SMALL_CELL_LUNG_CANCER		79	-0.32098463	-1.3350782	0.024390243	0.22253728	1	1550	tags=15%, list=9%, signal=17%
MARTINEZ_RESPONSE_TO_TRABECTEDIN_DN	MARTINEZ_RESPONSE_TO_TRABECTEDIN_DN		265	-0.275056	-1.332804	0	0.22495492	1	4473	tags=39%, list=25%, signal=51%
REACTOME_P75_NTR_RECEPTOR_MEDIATED_SIGNALLING	REACTOME_P75_NTR_RECEPTOR_MEDIATED_SIGNALLING		73	-0.320934	-1.3324598	0.04195804	0.224979	1	2582	tags=23%, list=14%, signal=27%
REACTOME_DOWNREGULATION_OF_SMAD2_3_SMAD4_TRANSCRIPTIONAL_ACTIVITY	REACTOME_DOWNREGULATION_OF_SMAD2_3_SMAD4_TRANSCRIPTIONAL_ACTIVITY		19	-0.4326985	-1.3323328	0.12635379	0.22482431	1	4748	tags=53%, list=26%, signal=71%
MULLIGHAN_MLL_SIGNATURE_2_DN	MULLIGHAN_MLL_SIGNATURE_2_DN		240	-0.27958828	-1.3319021	0	0.22508723	1	2992	tags=27%, list=17%, signal=32%
SANA_TNF_SIGNALING_UP	SANA_TNF_SIGNALING_UP		68	-0.33316964	-1.3310485	0.05882353	0.22575283	1	3102	tags=38%, list=17%, signal=46%
MALONEY_RESPONSE_TO_17AAG_UP	MALONEY_RESPONSE_TO_17AAG_UP		36	-0.37391502	-1.3310484	0.06043956	0.22542614	1	1616	tags=14%, list=9%, signal=15%
GENTILE_UV_HIGH_DOSE_DN	GENTILE_UV_HIGH_DOSE_DN		302	-0.27270073	-1.3309838	0	0.22516902	1	3193	tags=28%, list=18%, signal=34%
BYSTRYKH_HEMATOPOIESIS_STEM_CELL_AND_BRAIN_QTL_TRANS	BYSTRYKH_HEMATOPOIESIS_STEM_CELL_AND_BRAIN_QTL_TRANS		163	-0.2881754	-1.3304918	0	0.22548774	1	1741	tags=17%, list=10%, signal=18%
MCLACHLAN_DENTAL_CARIES_DN	MCLACHLAN_DENTAL_CARIES_DN		143	-0.29109034	-1.3295069	0.013888889	0.22644912	1	1748	tags=26%, list=10%, signal=28%
CHUNG_BLISTER_CYTOTOXICITY_DN	CHUNG_BLISTER_CYTOTOXICITY_DN		34	-0.39564174	-1.3286377	0.08520179	0.22736344	1	1371	tags=24%, list=8%, signal=25%
LIANG_HEMATOPOIESIS_STEM_CELL_NUMBER_LARGE_VS_TINY_UP	LIANG_HEMATOPOIESIS_STEM_CELL_NUMBER_LARGE_VS_TINY_UP		36	-0.36975712	-1.3274215	0.103626944	0.22860979	1	3072	tags=36%, list=17%, signal=43%
LI_INDUCED_T_TO_NATURAL_KILLER_DN	LI_INDUCED_T_TO_NATURAL_KILLER_DN		92	-0.30893618	-1.3255899	0.03448276	0.23058283	1	2153	tags=24%, list=12%, signal=27%
ENK_UV_RESPONSE_KERATINOCYTE_DN	ENK_UV_RESPONSE_KERATINOCYTE_DN		474	-0.25107977	-1.3253887	0	0.23046838	1	4250	tags=33%, list=24%, signal=42%
SMID_BREAST_CANCER_LUMINAL_B_DN	SMID_BREAST_CANCER_LUMINAL_B_DN		347	-0.257844	-1.3246166	0	0.23109826	1	1801	tags=21%, list=10%, signal=23%
PID_SMAD2_3PATHWAY	PID_SMAD2_3PATHWAY		17	-0.44969228	-1.3240886	0.10483871	0.23148896	1	4669	tags=53%, list=26%, signal=71%
BERENJENO_TRANSFORMED_BY_RHOA_FOREVER_UP	BERENJENO_TRANSFORMED_BY_RHOA_FOREVER_UP		16	-0.46895683	-1.3239026	0.1533101	0.23141894	1	324	tags=25%, list=2%, signal=25%
SA_TRKA_RECEPTOR	SA_TRKA_RECEPTOR		16	-0.46680105	-1.3228309	0.11678832	0.23255722	1	3604	tags=38%, list=20%, signal=47%
REACTOME_FANCONI_ANEMIA_PATHWAY	REACTOME_FANCONI_ANEMIA_PATHWAY		20	-0.4262987	-1.3227862	0.12903225	0.2322661	1	2603	tags=40%, list=14%, signal=47%
REACTOME_SYNTHESIS_AND_INTERCONVERSION_OF_NUCLEOTIDE_DI_AND_TRIPHOSPHATES	REACTOME_SYNTHESIS_AND_INTERCONVERSION_OF_NUCLEOTIDE_DI_AND_TRIPHOSPHATES		17	-0.44599473	-1.3226631	0.121673	0.2320711	1	2700	tags=47%, list=15%, signal=55%
LANDIS_ERBB2_BREAST_PRENEOPLASTIC_UP	LANDIS_ERBB2_BREAST_PRENEOPLASTIC_UP		16	-0.46045688	-1.3226275	0.1119403	0.23177373	1	4395	tags=63%, list=24%, signal=83%
PID_ANGIOPOIETIN_RECEPTOR_PATHWAY	PID_ANGIOPOIETIN_RECEPTOR_PATHWAY		44	-0.3636357	-1.3218668	0.08152174	0.23250045	1	1516	tags=14%, list=8%, signal=15%
MARIADASON_RESPONSE_TO_BUTYRATE_SULINDAC_4	MARIADASON_RESPONSE_TO_BUTYRATE_SULINDAC_4		17	-0.44194853	-1.3196943	0.11985019	0.23498613	1	1624	tags=41%, list=9%, signal=45%
JOHNSTONE_PARVB_TARGETS_1_DN	JOHNSTONE_PARVB_TARGETS_1_DN		59	-0.33121338	-1.3195081	0.084337346	0.23491779	1	2743	tags=37%, list=15%, signal=44%
JOHNSTONE_PARVB_TARGETS_2_DN	JOHNSTONE_PARVB_TARGETS_2_DN		317	-0.26870665	-1.3192024	0	0.23498894	1	3651	tags=32%, list=20%, signal=40%
MARTINEZ_RB1_AND_TP53_TARGETS_DN	MARTINEZ_RB1_AND_TP53_TARGETS_DN		480	-0.25356635	-1.3190783	0	0.23481089	1	2595	tags=21%, list=14%, signal=24%
PENG_RAPAMYCIN_RESPONSE_UP	PENG_RAPAMYCIN_RESPONSE_UP		170	-0.277957	-1.3189842	0	0.23457082	1	2619	tags=26%, list=15%, signal=30%
TENEDINI_MEGAKARYOCYTE_MARKERS	TENEDINI_MEGAKARYOCYTE_MARKERS		54	-0.34173846	-1.3188297	0.06321839	0.23451826	1	2729	tags=33%, list=15%, signal=39%
MCBRYAN_PUBERTAL_BREAST_6_7WK_DN	MCBRYAN_PUBERTAL_BREAST_6_7WK_DN		61	-0.3342773	-1.3186606	0.04117647	0.23440316	1	2238	tags=33%, list=12%, signal=37%
CHANGOLKAR_H2AFY_TARGETS_DN	CHANGOLKAR_H2AFY_TARGETS_DN		33	-0.38686118	-1.3144795	0.094339624	0.23991078	1	2838	tags=27%, list=16%, signal=32%
ST_ERK1_ERK2_MAPK_PATHWAY	ST_ERK1_ERK2_MAPK_PATHWAY		31	-0.39153758	-1.3139173	0.11004785	0.24044521	1	4686	tags=55%, list=26%, signal=74%
LI_LUNG_CANCER	LI_LUNG_CANCER		34	-0.37701094	-1.3133211	0.11659193	0.2409357	1	4562	tags=50%, list=25%, signal=67%
ONO_AML1_TARGETS_DN	ONO_AML1_TARGETS_DN		23	-0.4107039	-1.3125494	0.116541356	0.24174562	1	1632	tags=30%, list=9%, signal=33%
PID_ERBB1_RECEPTOR_PROXIMAL_PATHWAY	PID_ERBB1_RECEPTOR_PROXIMAL_PATHWAY		35	-0.36912388	-1.3107576	0.08370044	0.24407549	1	3012	tags=29%, list=17%, signal=34%
CASTELLANO_NRAS_TARGETS_UP	CASTELLANO_NRAS_TARGETS_UP		57	-0.35149232	-1.3105953	0.09375	0.24398838	1	1567	tags=25%, list=9%, signal=27%
GYORFFY_DOXORUBICIN_RESISTANCE	GYORFFY_DOXORUBICIN_RESISTANCE		41	-0.3478525	-1.3103083	0.05945946	0.24404256	1	2805	tags=27%, list=16%, signal=32%
SABATES_COLORECTAL_ADENOMA_SIZE_UP	SABATES_COLORECTAL_ADENOMA_SIZE_UP		16	-0.44651422	-1.310304	0.14089347	0.24371752	1	2238	tags=31%, list=12%, signal=36%
GRAHAM_CML_DIVIDING_VS_NORMAL_QUIESCENT_DN	GRAHAM_CML_DIVIDING_VS_NORMAL_QUIESCENT_DN		70	-0.31989262	-1.3097022	0.06081081	0.24432826	1	2304	tags=31%, list=13%, signal=36%
PLASARI_TGFB1_SIGNALING_VIA_NFIC_1HR_DN	PLASARI_TGFB1_SIGNALING_VIA_NFIC_1HR_DN		91	-0.30607447	-1.3090748	0.04379562	0.24485984	1	2754	tags=30%, list=15%, signal=35%
GROSS_HYPOXIA_VIA_ELK3_UP	GROSS_HYPOXIA_VIA_ELK3_UP		197	-0.2738726	-1.309059	0	0.24454376	1	3573	tags=37%, list=20%, signal=46%
AMBROSINI_FLAVOPIRIDOL_TREATMENT_TP53	AMBROSINI_FLAVOPIRIDOL_TREATMENT_TP53		97	-0.31040087	-1.3069032	0.00952381	0.24732612	1	1913	tags=24%, list=11%, signal=26%
SWEET_KRAS_ONCOGENIC_SIGNATURE	SWEET_KRAS_ONCOGENIC_SIGNATURE		75	-0.327406	-1.3066669	0.07575758	0.24731281	1	2910	tags=28%, list=16%, signal=33%
JUBAN_TARGETS_OF_SPI1_AND_FLI1_DN	JUBAN_TARGETS_OF_SPI1_AND_FLI1_DN		86	-0.3065778	-1.3062778	0.036697246	0.2474578	1	3789	tags=33%, list=21%, signal=41%
HOEBEKE_LYMPHOID_STEM_CELL_DN	HOEBEKE_LYMPHOID_STEM_CELL_DN		78	-0.32160366	-1.3054659	0.070866145	0.24820226	1	2834	tags=32%, list=16%, signal=38%
GOTZMANN_EPITHELIAL_TO_MESENCHYMAL_TRANSITION_UP	GOTZMANN_EPITHELIAL_TO_MESENCHYMAL_TRANSITION_UP		65	-0.3299642	-1.3046827	0.066176474	0.24887441	1	2233	tags=29%, list=12%, signal=33%
PUIFFE_INVASION_INHIBITED_BY_ASCITES_UP	PUIFFE_INVASION_INHIBITED_BY_ASCITES_UP		80	-0.31531763	-1.3040669	0.060150377	0.24938124	1	3652	tags=35%, list=20%, signal=44%
IZADPANAH_STEM_CELL_ADIPOSE_VS_BONE_UP	IZADPANAH_STEM_CELL_ADIPOSE_VS_BONE_UP		108	-0.30165374	-1.3032255	0.02970297	0.2502259	1	2136	tags=29%, list=12%, signal=32%
YE_METASTATIC_LIVER_CANCER	YE_METASTATIC_LIVER_CANCER		19	-0.4291028	-1.3024855	0.12267658	0.2509172	1	1333	tags=32%, list=7%, signal=34%
OUILLETTE_CLL_13Q14_DELETION_DN	OUILLETTE_CLL_13Q14_DELETION_DN		50	-0.34771976	-1.3019276	0.08024691	0.2513707	1	2324	tags=34%, list=13%, signal=39%
RASHI_RESPONSE_TO_IONIZING_RADIATION_1	RASHI_RESPONSE_TO_IONIZING_RADIATION_1		36	-0.370368	-1.3008838	0.10576923	0.25257075	1	2445	tags=33%, list=14%, signal=38%
REACTOME_APC_CDC20_MEDIATED_DEGRADATION_OF_NEK2A	REACTOME_APC_CDC20_MEDIATED_DEGRADATION_OF_NEK2A		21	-0.41239372	-1.3000821	0.12592593	0.253341	1	3236	tags=33%, list=18%, signal=41%
KEGG_HISTIDINE_METABOLISM	KEGG_HISTIDINE_METABOLISM		21	-0.39773422	-1.298962	0.13286713	0.2546997	1	104	tags=10%, list=1%, signal=10%
REACTOME_REGULATION_OF_MRNA_STABILITY_BY_PROTEINS_THAT_BIND_AU_RICH_ELEMENTS	REACTOME_REGULATION_OF_MRNA_STABILITY_BY_PROTEINS_THAT_BIND_AU_RICH_ELEMENTS		80	-0.31452942	-1.2987646	0.031496063	0.25466394	1	5355	tags=60%, list=30%, signal=85%
BOYLAN_MULTIPLE_MYELOMA_C_D_UP	BOYLAN_MULTIPLE_MYELOMA_C_D_UP		123	-0.29386026	-1.2961407	0	0.25802562	1	3182	tags=32%, list=18%, signal=38%
TURASHVILI_BREAST_DUCTAL_CARCINOMA_VS_LOBULAR_NORMAL_UP	TURASHVILI_BREAST_DUCTAL_CARCINOMA_VS_LOBULAR_NORMAL_UP		69	-0.32621005	-1.2952962	0.060606062	0.25886157	1	2681	tags=30%, list=15%, signal=36%
PID_REELIN_PATHWAY	PID_REELIN_PATHWAY		26	-0.40362296	-1.2934566	0.11811024	0.26133454	1	3986	tags=42%, list=22%, signal=54%
KEGG_NOD_LIKE_RECEPTOR_SIGNALING_PATHWAY	KEGG_NOD_LIKE_RECEPTOR_SIGNALING_PATHWAY		46	-0.3531653	-1.2926154	0.085427135	0.26220155	1	3670	tags=41%, list=20%, signal=52%
PASQUALUCCI_LYMPHOMA_BY_GC_STAGE_DN	PASQUALUCCI_LYMPHOMA_BY_GC_STAGE_DN		139	-0.29081917	-1.2923748	0.046875	0.26221052	1	2981	tags=30%, list=17%, signal=36%
HAMAI_APOPTOSIS_VIA_TRAIL_DN	HAMAI_APOPTOSIS_VIA_TRAIL_DN		151	-0.2883358	-1.291278	0.015384615	0.2635112	1	1274	tags=18%, list=7%, signal=19%
BILD_E2F3_ONCOGENIC_SIGNATURE	BILD_E2F3_ONCOGENIC_SIGNATURE		220	-0.27219272	-1.2908359	0	0.26375005	1	2334	tags=25%, list=13%, signal=29%
CHAUHAN_RESPONSE_TO_METHOXYESTRADIOL_UP	CHAUHAN_RESPONSE_TO_METHOXYESTRADIOL_UP		49	-0.335633	-1.2908168	0.07954545	0.2634307	1	3659	tags=33%, list=20%, signal=41%
BILD_HRAS_ONCOGENIC_SIGNATURE	BILD_HRAS_ONCOGENIC_SIGNATURE		225	-0.26758862	-1.2900771	0	0.2641669	1	2531	tags=25%, list=14%, signal=29%
PROVENZANI_METASTASIS_DN	PROVENZANI_METASTASIS_DN		122	-0.2837291	-1.2885575	0	0.2660914	1	2794	tags=25%, list=15%, signal=30%
REACTOME_SHC1_EVENTS_IN_EGFR_SIGNALING	REACTOME_SHC1_EVENTS_IN_EGFR_SIGNALING		15	-0.45362505	-1.2885499	0.19291338	0.26573977	1	3012	tags=33%, list=17%, signal=40%
CUI_TCF21_TARGETS_UP	CUI_TCF21_TARGETS_UP		34	-0.36532676	-1.2881154	0.11312217	0.26602495	1	2782	tags=44%, list=15%, signal=52%
ST_T_CELL_SIGNAL_TRANSDUCTION	ST_T_CELL_SIGNAL_TRANSDUCTION		36	-0.3666254	-1.2880726	0.11891892	0.26572058	1	2551	tags=28%, list=14%, signal=32%
PID_AP1_PATHWAY	PID_AP1_PATHWAY		58	-0.32902628	-1.2878772	0.05925926	0.26563278	1	546	tags=12%, list=3%, signal=12%
REACTOME_PRE_NOTCH_EXPRESSION_AND_PROCESSING	REACTOME_PRE_NOTCH_EXPRESSION_AND_PROCESSING		37	-0.35663915	-1.2872992	0.11	0.26610625	1	1597	tags=22%, list=9%, signal=24%
BASAKI_YBX1_TARGETS_DN	BASAKI_YBX1_TARGETS_DN		336	-0.26288286	-1.2869356	0	0.2663206	1	2905	tags=28%, list=16%, signal=33%
RIZKI_TUMOR_INVASIVENESS_3D_DN	RIZKI_TUMOR_INVASIVENESS_3D_DN		223	-0.27418488	-1.2864286	0.027027028	0.26666555	1	2625	tags=24%, list=15%, signal=27%
KANG_IMMORTALIZED_BY_TERT_DN	KANG_IMMORTALIZED_BY_TERT_DN		74	-0.32196292	-1.2849895	0.05185185	0.26852822	1	1752	tags=24%, list=10%, signal=27%
OXFORD_RALA_OR_RALB_TARGETS_DN	OXFORD_RALA_OR_RALB_TARGETS_DN		23	-0.40905625	-1.284968	0.10236221	0.2681938	1	2316	tags=35%, list=13%, signal=40%
ICHIBA_GRAFT_VERSUS_HOST_DISEASE_D7_UP	ICHIBA_GRAFT_VERSUS_HOST_DISEASE_D7_UP		74	-0.31951857	-1.2840025	0.10204082	0.2691414	1	2423	tags=27%, list=13%, signal=31%
ZHAN_MULTIPLE_MYELOMA_HP_DN	ZHAN_MULTIPLE_MYELOMA_HP_DN		39	-0.3427374	-1.2825471	0.087804876	0.2709083	1	1548	tags=23%, list=9%, signal=25%
WIERENGA_STAT5A_TARGETS_DN	WIERENGA_STAT5A_TARGETS_DN		157	-0.2825665	-1.2817581	0.025316456	0.27172306	1	1433	tags=20%, list=8%, signal=21%
ACOSTA_PROLIFERATION_INDEPENDENT_MYC_TARGETS_DN	ACOSTA_PROLIFERATION_INDEPENDENT_MYC_TARGETS_DN		97	-0.3046103	-1.2807338	0.06542056	0.2729022	1	2788	tags=28%, list=15%, signal=33%
HOSHIDA_LIVER_CANCER_SUBCLASS_S2	HOSHIDA_LIVER_CANCER_SUBCLASS_S2		111	-0.29261306	-1.2797484	0.045045044	0.27395508	1	3469	tags=24%, list=19%, signal=30%
TAKEDA_TARGETS_OF_NUP98_HOXA9_FUSION_16D_DN	TAKEDA_TARGETS_OF_NUP98_HOXA9_FUSION_16D_DN		86	-0.3102594	-1.2795805	0.07751938	0.27382857	1	2318	tags=27%, list=13%, signal=31%
LIAO_METASTASIS	LIAO_METASTASIS		491	-0.23713852	-1.2792107	0	0.2740321	1	3062	tags=28%, list=17%, signal=33%
KORKOLA_EMBRYONIC_CARCINOMA_VS_SEMINOMA_UP	KORKOLA_EMBRYONIC_CARCINOMA_VS_SEMINOMA_UP		15	-0.450759	-1.2789068	0.1614035	0.27407598	1	2805	tags=40%, list=16%, signal=47%
KLEIN_TARGETS_OF_BCR_ABL1_FUSION	KLEIN_TARGETS_OF_BCR_ABL1_FUSION		25	-0.38931933	-1.278754	0.12749004	0.2739506	1	377	tags=16%, list=2%, signal=16%
AMUNDSON_POOR_SURVIVAL_AFTER_GAMMA_RADIATION_8G	AMUNDSON_POOR_SURVIVAL_AFTER_GAMMA_RADIATION_8G		82	-0.3137875	-1.2750047	0.043165468	0.27939054	1	3445	tags=34%, list=19%, signal=42%
REACTOME_NUCLEOTIDE_EXCISION_REPAIR	REACTOME_NUCLEOTIDE_EXCISION_REPAIR		47	-0.33997804	-1.2737724	0.11173184	0.28093192	1	3413	tags=30%, list=19%, signal=37%
REACTOME_SIGNALING_BY_SCF_KIT	REACTOME_SIGNALING_BY_SCF_KIT		70	-0.31699443	-1.2735536	0.07575758	0.28087416	1	3192	tags=26%, list=18%, signal=31%
KEGG_GAP_JUNCTION	KEGG_GAP_JUNCTION		74	-0.31229317	-1.2726576	0.06622516	0.2817765	1	4088	tags=39%, list=23%, signal=50%
AMIT_EGF_RESPONSE_240_HELA	AMIT_EGF_RESPONSE_240_HELA		59	-0.3328147	-1.272237	0.08064516	0.28201276	1	2063	tags=22%, list=11%, signal=25%
PODAR_RESPONSE_TO_ADAPHOSTIN_DN	PODAR_RESPONSE_TO_ADAPHOSTIN_DN		17	-0.45003992	-1.2713932	0.16083916	0.28298455	1	2849	tags=47%, list=16%, signal=56%
YANG_BCL3_TARGETS_UP	YANG_BCL3_TARGETS_UP		297	-0.26794323	-1.270931	0	0.28328577	1	2439	tags=31%, list=14%, signal=35%
HU_GENOTOXIC_DAMAGE_24HR	HU_GENOTOXIC_DAMAGE_24HR		29	-0.37359053	-1.2704822	0.14166667	0.28370953	1	2877	tags=24%, list=16%, signal=29%
ALONSO_METASTASIS_UP	ALONSO_METASTASIS_UP		177	-0.27208906	-1.270417	0.016949153	0.28345457	1	2563	tags=21%, list=14%, signal=24%
ZHENG_IL22_SIGNALING_UP	ZHENG_IL22_SIGNALING_UP		33	-0.36898002	-1.2703949	0.118421055	0.2831329	1	668	tags=15%, list=4%, signal=16%
SHEN_SMARCA2_TARGETS_DN	SHEN_SMARCA2_TARGETS_DN		186	-0.2756968	-1.2702047	0.03846154	0.28303787	1	1985	tags=23%, list=11%, signal=25%
HOLLMANN_APOPTOSIS_VIA_CD40_UP	HOLLMANN_APOPTOSIS_VIA_CD40_UP		179	-0.27130973	-1.2687386	0.04255319	0.28495818	1	2727	tags=23%, list=15%, signal=27%
RUTELLA_RESPONSE_TO_CSF2RB_AND_IL4_DN	RUTELLA_RESPONSE_TO_CSF2RB_AND_IL4_DN		247	-0.25986707	-1.2680963	0	0.28544882	1	3004	tags=29%, list=17%, signal=34%
BERTUCCI_MEDULLARY_VS_DUCTAL_BREAST_CANCER_DN	BERTUCCI_MEDULLARY_VS_DUCTAL_BREAST_CANCER_DN		146	-0.28213704	-1.2677338	0.016129032	0.28566337	1	1034	tags=13%, list=6%, signal=14%
MULLIGHAN_MLL_SIGNATURE_1_DN	MULLIGHAN_MLL_SIGNATURE_1_DN		197	-0.2718269	-1.2669	0	0.28660554	1	2950	tags=25%, list=16%, signal=30%
BERNARD_PPAPDC1B_TARGETS_UP	BERNARD_PPAPDC1B_TARGETS_UP		35	-0.34995884	-1.2668979	0.116071425	0.28623855	1	3818	tags=46%, list=21%, signal=58%
BRACHAT_RESPONSE_TO_CAMPTOTHECIN_DN	BRACHAT_RESPONSE_TO_CAMPTOTHECIN_DN		43	-0.34427804	-1.265106	0.14	0.28870147	1	3014	tags=35%, list=17%, signal=42%
HOFFMANN_SMALL_PRE_BII_TO_IMMATURE_B_LYMPHOCYTE_DN	HOFFMANN_SMALL_PRE_BII_TO_IMMATURE_B_LYMPHOCYTE_DN		41	-0.35755926	-1.2648695	0.15463917	0.2886817	1	2423	tags=32%, list=13%, signal=37%
SMID_BREAST_CANCER_ERBB2_UP	SMID_BREAST_CANCER_ERBB2_UP		99	-0.30262437	-1.2645711	0.075630255	0.2888446	1	1861	tags=20%, list=10%, signal=22%
VALK_AML_CLUSTER_3	VALK_AML_CLUSTER_3		28	-0.38473308	-1.2635443	0.14537445	0.29004917	1	3369	tags=50%, list=19%, signal=61%
REACTOME_SIGNALING_BY_RHO_GTPASES	REACTOME_SIGNALING_BY_RHO_GTPASES		100	-0.30019143	-1.2627733	0.034782607	0.29078093	1	1752	tags=20%, list=10%, signal=22%
GHANDHI_BYSTANDER_IRRADIATION_UP	GHANDHI_BYSTANDER_IRRADIATION_UP		64	-0.31878892	-1.2623911	0.07909604	0.29099277	1	1069	tags=20%, list=6%, signal=22%
MARZEC_IL2_SIGNALING_UP	MARZEC_IL2_SIGNALING_UP		93	-0.295676	-1.262347	0.058333334	0.2907018	1	2203	tags=25%, list=12%, signal=28%
RODRIGUES_NTN1_TARGETS_DN	RODRIGUES_NTN1_TARGETS_DN		122	-0.28986993	-1.2616036	0.033333335	0.29158595	1	1806	tags=22%, list=10%, signal=24%
GAUSSMANN_MLL_AF4_FUSION_TARGETS_C_UP	GAUSSMANN_MLL_AF4_FUSION_TARGETS_C_UP		154	-0.27625898	-1.2613707	0	0.2916044	1	3021	tags=30%, list=17%, signal=36%
RODRIGUES_NTN1_AND_DCC_TARGETS	RODRIGUES_NTN1_AND_DCC_TARGETS		32	-0.36576736	-1.2592207	0.12345679	0.29509273	1	399	tags=16%, list=2%, signal=16%
HENDRICKS_SMARCA4_TARGETS_UP	HENDRICKS_SMARCA4_TARGETS_UP		47	-0.33649042	-1.2583231	0.096938774	0.29613557	1	2818	tags=34%, list=16%, signal=40%
WIERENGA_STAT5A_TARGETS_GROUP1	WIERENGA_STAT5A_TARGETS_GROUP1		107	-0.28704798	-1.2578908	0.04255319	0.29636908	1	2771	tags=32%, list=15%, signal=37%
HESS_TARGETS_OF_HOXA9_AND_MEIS1_DN	HESS_TARGETS_OF_HOXA9_AND_MEIS1_DN		53	-0.32970867	-1.2576264	0.112426035	0.29637188	1	1294	tags=23%, list=7%, signal=24%
WENDT_COHESIN_TARGETS_UP	WENDT_COHESIN_TARGETS_UP		32	-0.36295238	-1.2567428	0.11261261	0.29736614	1	3847	tags=38%, list=21%, signal=48%
ZHAN_MULTIPLE_MYELOMA_DN	ZHAN_MULTIPLE_MYELOMA_DN		26	-0.38375455	-1.2565136	0.16666667	0.29727662	1	2671	tags=35%, list=15%, signal=41%
ELVIDGE_HYPOXIA_BY_DMOG_DN	ELVIDGE_HYPOXIA_BY_DMOG_DN		54	-0.32671085	-1.2557051	0.06666667	0.29819098	1	2592	tags=26%, list=14%, signal=30%
HOWLIN_PUBERTAL_MAMMARY_GLAND	HOWLIN_PUBERTAL_MAMMARY_GLAND		42	-0.3428178	-1.2556068	0.100961536	0.29795957	1	2088	tags=36%, list=12%, signal=40%
GROSS_HYPOXIA_VIA_ELK3_AND_HIF1A_DN	GROSS_HYPOXIA_VIA_ELK3_AND_HIF1A_DN		99	-0.30167913	-1.2549366	0.037037037	0.2986603	1	4188	tags=47%, list=23%, signal=61%
TARTE_PLASMA_CELL_VS_B_LYMPHOCYTE_UP	TARTE_PLASMA_CELL_VS_B_LYMPHOCYTE_UP		69	-0.31306535	-1.2545675	0.10958904	0.29886514	1	2950	tags=26%, list=16%, signal=31%
KANG_IMMORTALIZED_BY_TERT_UP	KANG_IMMORTALIZED_BY_TERT_UP		76	-0.31356946	-1.2537307	0.092307694	0.299752	1	1685	tags=20%, list=9%, signal=22%
PID_P73PATHWAY	PID_P73PATHWAY		69	-0.3145869	-1.252723	0.06428572	0.30110985	1	2840	tags=35%, list=16%, signal=41%
VANDESLUIS_COMMD1_TARGETS_GROUP_3_UP	VANDESLUIS_COMMD1_TARGETS_GROUP_3_UP		62	-0.318197	-1.2513402	0.08695652	0.3030268	1	2384	tags=32%, list=13%, signal=37%
MAINA_VHL_TARGETS_DN	MAINA_VHL_TARGETS_DN		15	-0.44840944	-1.2505386	0.17708333	0.3040209	1	1352	tags=33%, list=7%, signal=36%
SCHAEFFER_PROSTATE_DEVELOPMENT_12HR_UP	SCHAEFFER_PROSTATE_DEVELOPMENT_12HR_UP		93	-0.3011248	-1.2489566	0.07272727	0.3062312	1	2464	tags=28%, list=14%, signal=32%
KEGG_LEUKOCYTE_TRANSENDOTHELIAL_MIGRATION	KEGG_LEUKOCYTE_TRANSENDOTHELIAL_MIGRATION		85	-0.29955417	-1.2488667	0.03305785	0.30597404	1	2770	tags=31%, list=15%, signal=36%
BOQUEST_STEM_CELL_DN	BOQUEST_STEM_CELL_DN		163	-0.27520895	-1.2473397	0.03508772	0.3080313	1	1775	tags=21%, list=10%, signal=23%
RUTELLA_RESPONSE_TO_HGF_DN	RUTELLA_RESPONSE_TO_HGF_DN		195	-0.26995155	-1.2470189	0.027777778	0.3082473	1	3022	tags=30%, list=17%, signal=35%
WALLACE_JAK2_TARGETS_UP	WALLACE_JAK2_TARGETS_UP		24	-0.38144594	-1.2455391	0.16666667	0.31022316	1	4581	tags=50%, list=25%, signal=67%
LANDIS_BREAST_CANCER_PROGRESSION_UP	LANDIS_BREAST_CANCER_PROGRESSION_UP		38	-0.35814008	-1.2454984	0.1273585	0.30991903	1	767	tags=16%, list=4%, signal=16%
PENG_GLUTAMINE_DEPRIVATION_DN	PENG_GLUTAMINE_DEPRIVATION_DN		321	-0.24706855	-1.2440675	0	0.31182313	1	5333	tags=46%, list=30%, signal=64%
REACTOME_PRE_NOTCH_PROCESSING_IN_GOLGI	REACTOME_PRE_NOTCH_PROCESSING_IN_GOLGI		15	-0.4364728	-1.2440503	0.16778524	0.3114507	1	1562	tags=27%, list=9%, signal=29%
REACTOME_ACTIVATION_OF_NF_KAPPAB_IN_B_CELLS	REACTOME_ACTIVATION_OF_NF_KAPPAB_IN_B_CELLS		59	-0.31196418	-1.2431782	0.096551724	0.312485	1	5245	tags=54%, list=29%, signal=76%
ZHANG_PROLIFERATING_VS_QUIESCENT	ZHANG_PROLIFERATING_VS_QUIESCENT		47	-0.3381426	-1.2429824	0.113513514	0.31244957	1	3526	tags=38%, list=20%, signal=47%
LEE_DIFFERENTIATING_T_LYMPHOCYTE	LEE_DIFFERENTIATING_T_LYMPHOCYTE		141	-0.28387728	-1.2429694	0.074074075	0.3120738	1	2953	tags=33%, list=16%, signal=39%
TURASHVILI_BREAST_DUCTAL_CARCINOMA_VS_DUCTAL_NORMAL_UP	TURASHVILI_BREAST_DUCTAL_CARCINOMA_VS_DUCTAL_NORMAL_UP		39	-0.34433654	-1.2425345	0.11304348	0.3123997	1	2683	tags=44%, list=15%, signal=51%
RAO_BOUND_BY_SALL4_ISOFORM_B	RAO_BOUND_BY_SALL4_ISOFORM_B		425	-0.2435759	-1.2410758	0	0.31455767	1	2355	tags=20%, list=13%, signal=22%
RODRIGUES_DCC_TARGETS_DN	RODRIGUES_DCC_TARGETS_DN		110	-0.2831872	-1.2409966	0.08163265	0.31433198	1	2410	tags=25%, list=13%, signal=28%
REACTOME_PYRUVATE_METABOLISM	REACTOME_PYRUVATE_METABOLISM		17	-0.427432	-1.2400384	0.15925926	0.31561956	1	411	tags=12%, list=2%, signal=12%
WU_HBX_TARGETS_3_UP	WU_HBX_TARGETS_3_UP		15	-0.43162236	-1.2393979	0.2012987	0.31641385	1	2718	tags=27%, list=15%, signal=31%
MIKKELSEN_MEF_LCP_WITH_H3K4ME3	MIKKELSEN_MEF_LCP_WITH_H3K4ME3		97	-0.294257	-1.2389017	0.08411215	0.3169105	1	2821	tags=36%, list=16%, signal=43%
NIELSEN_GIST_VS_SYNOVIAL_SARCOMA_UP	NIELSEN_GIST_VS_SYNOVIAL_SARCOMA_UP		17	-0.4167583	-1.2382759	0.18518518	0.31749207	1	813	tags=29%, list=5%, signal=31%
MCCABE_HOXC6_TARGETS_DN	MCCABE_HOXC6_TARGETS_DN		21	-0.40424412	-1.2364626	0.16666667	0.32015327	1	1337	tags=24%, list=7%, signal=26%
THUM_SYSTOLIC_HEART_FAILURE_UP	THUM_SYSTOLIC_HEART_FAILURE_UP		336	-0.24368119	-1.2340218	0.05882353	0.324126	1	2704	tags=24%, list=15%, signal=27%
REACTOME_GPCR_DOWNSTREAM_SIGNALING	REACTOME_GPCR_DOWNSTREAM_SIGNALING		272	-0.261112	-1.2337761	0.05	0.32416174	1	1777	tags=17%, list=10%, signal=19%
MIKKELSEN_IPS_WITH_HCP_H3K27ME3	MIKKELSEN_IPS_WITH_HCP_H3K27ME3		58	-0.3151926	-1.2326996	0.125	0.32565138	1	857	tags=16%, list=5%, signal=16%
SCHWAB_TARGETS_OF_BMYB_POLYMORPHIC_VARIANTS_DN	SCHWAB_TARGETS_OF_BMYB_POLYMORPHIC_VARIANTS_DN		16	-0.41949734	-1.2320613	0.19330855	0.3263295	1	1489	tags=31%, list=8%, signal=34%
AUNG_GASTRIC_CANCER	AUNG_GASTRIC_CANCER		39	-0.339714	-1.2318069	0.14090909	0.32634878	1	2229	tags=23%, list=12%, signal=26%
DUNNE_TARGETS_OF_AML1_MTG8_FUSION_DN	DUNNE_TARGETS_OF_AML1_MTG8_FUSION_DN		19	-0.41355222	-1.2310765	0.23272727	0.32730687	1	770	tags=32%, list=4%, signal=33%
REACTOME_PRE_NOTCH_TRANSCRIPTION_AND_TRANSLATION	REACTOME_PRE_NOTCH_TRANSCRIPTION_AND_TRANSLATION		23	-0.3810758	-1.2303536	0.1634981	0.32822147	1	1597	tags=22%, list=9%, signal=24%
BIOCARTA_MPR_PATHWAY	BIOCARTA_MPR_PATHWAY		31	-0.36344242	-1.2298982	0.15656565	0.32869163	1	3228	tags=35%, list=18%, signal=43%
KEGG_FC_EPSILON_RI_SIGNALING_PATHWAY	KEGG_FC_EPSILON_RI_SIGNALING_PATHWAY		56	-0.3131055	-1.228234	0.10828026	0.3311682	1	3670	tags=34%, list=20%, signal=42%
REACTOME_RESOLUTION_OF_AP_SITES_VIA_THE_MULTIPLE_NUCLEOTIDE_PATCH_REPLACEMENT_PATHWAY	REACTOME_RESOLUTION_OF_AP_SITES_VIA_THE_MULTIPLE_NUCLEOTIDE_PATCH_REPLACEMENT_PATHWAY		16	-0.4281529	-1.2280809	0.19855596	0.33102807	1	4435	tags=44%, list=25%, signal=58%
SESTO_RESPONSE_TO_UV_C2	SESTO_RESPONSE_TO_UV_C2		51	-0.32899094	-1.2278352	0.12941177	0.33100718	1	3156	tags=29%, list=17%, signal=36%
REACTOME_NRAGE_SIGNALS_DEATH_THROUGH_JNK	REACTOME_NRAGE_SIGNALS_DEATH_THROUGH_JNK		40	-0.34941182	-1.2269468	0.13839285	0.33209908	1	2582	tags=25%, list=14%, signal=29%
KIM_TIAL1_TARGETS	KIM_TIAL1_TARGETS		30	-0.35743782	-1.2264079	0.1563786	0.3326787	1	3833	tags=33%, list=21%, signal=42%
LINDVALL_IMMORTALIZED_BY_TERT_UP	LINDVALL_IMMORTALIZED_BY_TERT_UP		62	-0.31401798	-1.2256191	0.13043478	0.3337061	1	2132	tags=29%, list=12%, signal=33%
MULLIGHAN_NPM1_SIGNATURE_3_DN	MULLIGHAN_NPM1_SIGNATURE_3_DN		138	-0.26722553	-1.2253423	0.03797468	0.33380508	1	1782	tags=18%, list=10%, signal=20%
LEI_MYB_TARGETS	LEI_MYB_TARGETS		279	-0.26083934	-1.2252345	0.125	0.33357903	1	3644	tags=32%, list=20%, signal=40%
PID_CASPASE_PATHWAY	PID_CASPASE_PATHWAY		47	-0.31618997	-1.2239901	0.12021858	0.33546427	1	3017	tags=32%, list=17%, signal=38%
TONKS_TARGETS_OF_RUNX1_RUNX1T1_FUSION_SUSTAINDED_IN_ERYTHROCYTE_UP	TONKS_TARGETS_OF_RUNX1_RUNX1T1_FUSION_SUSTAINDED_IN_ERYTHROCYTE_UP		40	-0.34476835	-1.2239306	0.1388889	0.33515635	1	2079	tags=35%, list=12%, signal=39%
SANSOM_APC_TARGETS_DN	SANSOM_APC_TARGETS_DN		252	-0.25341964	-1.2234669	0.03125	0.3355917	1	2058	tags=21%, list=11%, signal=23%
FRIDMAN_SENESCENCE_UP	FRIDMAN_SENESCENCE_UP		70	-0.3070419	-1.2231865	0.10958904	0.33570674	1	1796	tags=30%, list=10%, signal=33%
PID_ARF6_TRAFFICKING_PATHWAY	PID_ARF6_TRAFFICKING_PATHWAY		45	-0.32912034	-1.22294	0.13636364	0.33578798	1	3481	tags=42%, list=19%, signal=52%
KOHOUTEK_CCNT2_TARGETS	KOHOUTEK_CCNT2_TARGETS		42	-0.33811304	-1.2226133	0.12162162	0.3360279	1	2486	tags=29%, list=14%, signal=33%
TANG_SENESCENCE_TP53_TARGETS_UP	TANG_SENESCENCE_TP53_TARGETS_UP		21	-0.3954657	-1.2210624	0.19285715	0.33845344	1	1344	tags=19%, list=7%, signal=21%
PENG_GLUCOSE_DEPRIVATION_DN	PENG_GLUCOSE_DEPRIVATION_DN		149	-0.27239272	-1.2205126	0.056338027	0.3391594	1	2733	tags=23%, list=15%, signal=27%
HOLLEMAN_VINCRISTINE_RESISTANCE_ALL_DN	HOLLEMAN_VINCRISTINE_RESISTANCE_ALL_DN		19	-0.41028598	-1.2201713	0.17175573	0.33937016	1	3140	tags=26%, list=17%, signal=32%
ELVIDGE_HIF1A_AND_HIF2A_TARGETS_UP	ELVIDGE_HIF1A_AND_HIF2A_TARGETS_UP		38	-0.33552593	-1.2199056	0.15	0.33946422	1	2509	tags=18%, list=14%, signal=21%
SIG_IL4RECEPTOR_IN_B_LYPHOCYTES	SIG_IL4RECEPTOR_IN_B_LYPHOCYTES		27	-0.37051648	-1.2188164	0.16589862	0.34101838	1	690	tags=15%, list=4%, signal=15%
MULLIGHAN_NPM1_MUTATED_SIGNATURE_1_UP	MULLIGHAN_NPM1_MUTATED_SIGNATURE_1_UP		215	-0.25709945	-1.2175059	0.025641026	0.34292832	1	2803	tags=25%, list=16%, signal=29%
PID_NECTIN_PATHWAY	PID_NECTIN_PATHWAY		28	-0.3632558	-1.2175016	0.18552037	0.34252936	1	2924	tags=25%, list=16%, signal=30%
WANG_SMARCE1_TARGETS_DN	WANG_SMARCE1_TARGETS_DN		339	-0.2473569	-1.2171302	0.05	0.34282723	1	3038	tags=26%, list=17%, signal=30%
GU_PDEF_TARGETS_UP	GU_PDEF_TARGETS_UP		67	-0.30235997	-1.2166388	0.08450704	0.34324145	1	3831	tags=43%, list=21%, signal=55%
MCBRYAN_PUBERTAL_BREAST_6_7WK_UP	MCBRYAN_PUBERTAL_BREAST_6_7WK_UP		172	-0.26381034	-1.215957	0.01754386	0.34414002	1	2626	tags=23%, list=15%, signal=27%
JECHLINGER_EPITHELIAL_TO_MESENCHYMAL_TRANSITION_UP	JECHLINGER_EPITHELIAL_TO_MESENCHYMAL_TRANSITION_UP		56	-0.31176308	-1.2159445	0.12716763	0.34374884	1	2458	tags=27%, list=14%, signal=31%
LUI_THYROID_CANCER_CLUSTER_2	LUI_THYROID_CANCER_CLUSTER_2		38	-0.34764525	-1.2158265	0.145	0.34354308	1	2149	tags=21%, list=12%, signal=24%
SU_PLACENTA	SU_PLACENTA		16	-0.42405292	-1.215595	0.22377622	0.34349597	1	2946	tags=38%, list=16%, signal=45%
DAVICIONI_TARGETS_OF_PAX_FOXO1_FUSIONS_UP	DAVICIONI_TARGETS_OF_PAX_FOXO1_FUSIONS_UP		235	-0.2544774	-1.2153933	0.0882353	0.3434307	1	1763	tags=22%, list=10%, signal=24%
MARTINEZ_TP53_TARGETS_DN	MARTINEZ_TP53_TARGETS_DN		476	-0.23850614	-1.2151809	0	0.3434681	1	2851	tags=22%, list=16%, signal=26%
MATTIOLI_MGUS_VS_PCL	MATTIOLI_MGUS_VS_PCL		89	-0.28633314	-1.2151455	0.06306306	0.3431385	1	3301	tags=33%, list=18%, signal=40%
FUJII_YBX1_TARGETS_UP	FUJII_YBX1_TARGETS_UP		32	-0.3537671	-1.21341	0.17948718	0.34592625	1	1860	tags=28%, list=10%, signal=31%
ALCALAY_AML_BY_NPM1_LOCALIZATION_UP	ALCALAY_AML_BY_NPM1_LOCALIZATION_UP		110	-0.27997303	-1.2132658	0.06521739	0.34573248	1	1159	tags=15%, list=6%, signal=15%
TURASHVILI_BREAST_LOBULAR_CARCINOMA_VS_LOBULAR_NORMAL_DN	TURASHVILI_BREAST_LOBULAR_CARCINOMA_VS_LOBULAR_NORMAL_DN		63	-0.29706752	-1.2125028	0.11299435	0.34666884	1	2170	tags=30%, list=12%, signal=34%
JISON_SICKLE_CELL_DISEASE_UP	JISON_SICKLE_CELL_DISEASE_UP		156	-0.26388747	-1.2124584	0.06451613	0.34634537	1	3132	tags=31%, list=17%, signal=37%
WEIGEL_OXIDATIVE_STRESS_RESPONSE	WEIGEL_OXIDATIVE_STRESS_RESPONSE		32	-0.33929843	-1.2124305	0.14611872	0.34599322	1	3637	tags=34%, list=20%, signal=43%
HOFMANN_CELL_LYMPHOMA_UP	HOFMANN_CELL_LYMPHOMA_UP		40	-0.3268088	-1.2112793	0.17098446	0.34769246	1	3641	tags=33%, list=20%, signal=41%
PID_TELOMERASE_PATHWAY	PID_TELOMERASE_PATHWAY		65	-0.30666798	-1.2110461	0.091603056	0.34767815	1	3414	tags=28%, list=19%, signal=34%
REACTOME_CLASS_I_MHC_MEDIATED_ANTIGEN_PROCESSING_PRESENTATION	REACTOME_CLASS_I_MHC_MEDIATED_ANTIGEN_PROCESSING_PRESENTATION		219	-0.25187266	-1.2106435	0.03846154	0.34806496	1	4439	tags=37%, list=25%, signal=48%
DEBIASI_APOPTOSIS_BY_REOVIRUS_INFECTION_UP	DEBIASI_APOPTOSIS_BY_REOVIRUS_INFECTION_UP		296	-0.24859424	-1.2096457	0	0.34957442	1	3582	tags=32%, list=20%, signal=39%
LIM_MAMMARY_LUMINAL_MATURE_DN	LIM_MAMMARY_LUMINAL_MATURE_DN		81	-0.2919529	-1.2092454	0.12698413	0.34989196	1	2266	tags=26%, list=13%, signal=30%
PARK_HSC_AND_MULTIPOTENT_PROGENITORS	PARK_HSC_AND_MULTIPOTENT_PROGENITORS		48	-0.32341108	-1.2090329	0.1626506	0.34987038	1	3230	tags=31%, list=18%, signal=38%
HUPER_BREAST_BASAL_VS_LUMINAL_DN	HUPER_BREAST_BASAL_VS_LUMINAL_DN		48	-0.32223433	-1.2090275	0.18072289	0.34948406	1	2136	tags=35%, list=12%, signal=40%
RAMPON_ENRICHED_LEARNING_ENVIRONMENT_LATE_UP	RAMPON_ENRICHED_LEARNING_ENVIRONMENT_LATE_UP		21	-0.39822045	-1.2082348	0.17467248	0.35051605	1	663	tags=10%, list=4%, signal=10%
PENG_GLUTAMINE_DEPRIVATION_UP	PENG_GLUTAMINE_DEPRIVATION_UP		36	-0.3352761	-1.2079018	0.15962441	0.350668	1	1738	tags=25%, list=10%, signal=28%
PID_DELTA_NP63_PATHWAY	PID_DELTA_NP63_PATHWAY		40	-0.33586726	-1.2072754	0.13690476	0.35133734	1	2504	tags=33%, list=14%, signal=38%
BOYAULT_LIVER_CANCER_SUBCLASS_G6_UP	BOYAULT_LIVER_CANCER_SUBCLASS_G6_UP		58	-0.311458	-1.2072283	0.11111111	0.35101262	1	2521	tags=28%, list=14%, signal=32%
YAGI_AML_WITH_T_8_21_TRANSLOCATION	YAGI_AML_WITH_T_8_21_TRANSLOCATION		311	-0.24955866	-1.2069566	0	0.35103354	1	2833	tags=22%, list=16%, signal=25%
DORSAM_HOXA9_TARGETS_DN	DORSAM_HOXA9_TARGETS_DN		31	-0.35942468	-1.2068367	0.17535545	0.35085773	1	2814	tags=23%, list=16%, signal=27%
REACTOME_TRANSCRIPTION_COUPLED_NER_TC_NER	REACTOME_TRANSCRIPTION_COUPLED_NER_TC_NER		43	-0.33510688	-1.2066733	0.16666667	0.35072395	1	3413	tags=30%, list=19%, signal=37%
DEBIASI_APOPTOSIS_BY_REOVIRUS_INFECTION_DN	DEBIASI_APOPTOSIS_BY_REOVIRUS_INFECTION_DN		277	-0.24550895	-1.2063872	0	0.35082638	1	2849	tags=22%, list=16%, signal=26%
BREDEMEYER_RAG_SIGNALING_VIA_ATM_NOT_VIA_NFKB_UP	BREDEMEYER_RAG_SIGNALING_VIA_ATM_NOT_VIA_NFKB_UP		42	-0.3255753	-1.2063152	0.11931818	0.35057685	1	2423	tags=26%, list=13%, signal=30%
BROWNE_HCMV_INFECTION_24HR_DN	BROWNE_HCMV_INFECTION_24HR_DN		132	-0.26870215	-1.2062194	0.04597701	0.35035953	1	2182	tags=23%, list=12%, signal=26%
YANG_BREAST_CANCER_ESR1_BULK_DN	YANG_BREAST_CANCER_ESR1_BULK_DN		19	-0.3963	-1.2061023	0.22097379	0.3501673	1	3070	tags=53%, list=17%, signal=63%
ZHAN_VARIABLE_EARLY_DIFFERENTIATION_GENES_DN	ZHAN_VARIABLE_EARLY_DIFFERENTIATION_GENES_DN		30	-0.35717887	-1.2051779	0.19607843	0.35147887	1	4677	tags=43%, list=26%, signal=58%
KATSANOU_ELAVL1_TARGETS_DN	KATSANOU_ELAVL1_TARGETS_DN		122	-0.2671353	-1.2051743	0.089108914	0.35109276	1	2439	tags=29%, list=14%, signal=33%
IGARASHI_ATF4_TARGETS_DN	IGARASHI_ATF4_TARGETS_DN		80	-0.2869846	-1.2044587	0.112	0.35205486	1	2051	tags=23%, list=11%, signal=25%
STEIN_ESR1_TARGETS	STEIN_ESR1_TARGETS		78	-0.28807306	-1.2022343	0.136	0.35576442	1	2414	tags=33%, list=13%, signal=38%
FAELT_B_CLL_WITH_VH_REARRANGEMENTS_UP	FAELT_B_CLL_WITH_VH_REARRANGEMENTS_UP		44	-0.3229447	-1.2008231	0.118644066	0.35796046	1	2344	tags=23%, list=13%, signal=26%
BIOCARTA_VEGF_PATHWAY	BIOCARTA_VEGF_PATHWAY		28	-0.37490082	-1.1994873	0.16818182	0.36009327	1	4916	tags=50%, list=27%, signal=69%
RIZ_ERYTHROID_DIFFERENTIATION_HBZ	RIZ_ERYTHROID_DIFFERENTIATION_HBZ		34	-0.33349276	-1.1990592	0.16267942	0.360514	1	2938	tags=26%, list=16%, signal=32%
TAKEDA_TARGETS_OF_NUP98_HOXA9_FUSION_3D_UP	TAKEDA_TARGETS_OF_NUP98_HOXA9_FUSION_3D_UP		136	-0.25907922	-1.1987237	0.05882353	0.36075288	1	1785	tags=21%, list=10%, signal=23%
HALMOS_CEBPA_TARGETS_DN	HALMOS_CEBPA_TARGETS_DN		36	-0.3385524	-1.1983138	0.17050691	0.3611138	1	1870	tags=36%, list=10%, signal=40%
JAZAERI_BREAST_CANCER_BRCA1_VS_BRCA2_DN	JAZAERI_BREAST_CANCER_BRCA1_VS_BRCA2_DN		35	-0.34206668	-1.1981432	0.19534884	0.36100692	1	3753	tags=37%, list=21%, signal=47%
SAGIV_CD24_TARGETS_DN	SAGIV_CD24_TARGETS_DN		43	-0.3219144	-1.1978174	0.15075377	0.36121985	1	2079	tags=35%, list=12%, signal=39%
BIOCARTA_MITOCHONDRIA_PATHWAY	BIOCARTA_MITOCHONDRIA_PATHWAY		21	-0.3962939	-1.1963439	0.2	0.3634388	1	1936	tags=29%, list=11%, signal=32%
BONOME_OVARIAN_CANCER_SURVIVAL_SUBOPTIMAL_DEBULKING	BONOME_OVARIAN_CANCER_SURVIVAL_SUBOPTIMAL_DEBULKING		448	-0.22536129	-1.1962615	0	0.36317953	1	2634	tags=19%, list=15%, signal=22%
PID_ILK_PATHWAY	PID_ILK_PATHWAY		42	-0.3318738	-1.1948853	0.15508021	0.3652946	1	4398	tags=43%, list=24%, signal=57%
HEDENFALK_BREAST_CANCER_BRCA1_VS_BRCA2	HEDENFALK_BREAST_CANCER_BRCA1_VS_BRCA2		153	-0.2580104	-1.1946669	0	0.36537862	1	4026	tags=36%, list=22%, signal=46%
BREDEMEYER_RAG_SIGNALING_NOT_VIA_ATM_UP	BREDEMEYER_RAG_SIGNALING_NOT_VIA_ATM_UP		49	-0.31099668	-1.193648	0.14136125	0.36709794	1	833	tags=10%, list=5%, signal=11%
MOOTHA_GLUCONEOGENESIS	MOOTHA_GLUCONEOGENESIS		27	-0.36922264	-1.1935827	0.20089285	0.36680365	1	3890	tags=44%, list=22%, signal=57%
AZARE_NEOPLASTIC_TRANSFORMATION_BY_STAT3_UP	AZARE_NEOPLASTIC_TRANSFORMATION_BY_STAT3_UP		95	-0.27724046	-1.1929176	0.09009009	0.36768052	1	3083	tags=28%, list=17%, signal=34%
LOPEZ_TRANSLATION_VIA_FN1_SIGNALING	LOPEZ_TRANSLATION_VIA_FN1_SIGNALING		34	-0.3420509	-1.1927392	0.17297298	0.3676646	1	2825	tags=38%, list=16%, signal=45%
REACTOME_SIGNALING_BY_ILS	REACTOME_SIGNALING_BY_ILS		89	-0.28180942	-1.1926686	0.06779661	0.3673873	1	3073	tags=26%, list=17%, signal=31%
SESTO_RESPONSE_TO_UV_C6	SESTO_RESPONSE_TO_UV_C6		39	-0.3278839	-1.1922879	0.1618497	0.36768666	1	3443	tags=33%, list=19%, signal=41%
SA_PTEN_PATHWAY	SA_PTEN_PATHWAY		17	-0.41202977	-1.1919276	0.2581818	0.36799222	1	3604	tags=35%, list=20%, signal=44%
CHAUHAN_RESPONSE_TO_METHOXYESTRADIOL_DN	CHAUHAN_RESPONSE_TO_METHOXYESTRADIOL_DN		93	-0.28471783	-1.1914254	0.104347825	0.36857033	1	2961	tags=27%, list=16%, signal=32%
REACTOME_NOTCH1_INTRACELLULAR_DOMAIN_REGULATES_TRANSCRIPTION	REACTOME_NOTCH1_INTRACELLULAR_DOMAIN_REGULATES_TRANSCRIPTION		42	-0.33078727	-1.1912795	0.1724138	0.36842772	1	2259	tags=24%, list=13%, signal=27%
REACTOME_DOWNREGULATION_OF_TGF_BETA_RECEPTOR_SIGNALING	REACTOME_DOWNREGULATION_OF_TGF_BETA_RECEPTOR_SIGNALING		21	-0.38510087	-1.1906356	0.23412699	0.3692228	1	4682	tags=57%, list=26%, signal=77%
THEILGAARD_NEUTROPHIL_AT_SKIN_WOUND_DN	THEILGAARD_NEUTROPHIL_AT_SKIN_WOUND_DN		207	-0.25547123	-1.1904169	0.027777778	0.36929604	1	3182	tags=26%, list=18%, signal=31%
SATO_SILENCED_EPIGENETICALLY_IN_PANCREATIC_CANCER	SATO_SILENCED_EPIGENETICALLY_IN_PANCREATIC_CANCER		31	-0.34162596	-1.1901022	0.13574661	0.3695664	1	2899	tags=32%, list=16%, signal=38%
BIOCARTA_MAL_PATHWAY	BIOCARTA_MAL_PATHWAY		17	-0.40625656	-1.1897707	0.22592592	0.36988068	1	3017	tags=35%, list=17%, signal=42%
BORCZUK_MALIGNANT_MESOTHELIOMA_DN	BORCZUK_MALIGNANT_MESOTHELIOMA_DN		71	-0.29658806	-1.1897274	0.13986014	0.3695592	1	552	tags=14%, list=3%, signal=14%
GENTILE_UV_RESPONSE_CLUSTER_D4	GENTILE_UV_RESPONSE_CLUSTER_D4		54	-0.31235677	-1.1896821	0.14444445	0.36922756	1	3393	tags=33%, list=19%, signal=41%
KAMIKUBO_MYELOID_MN1_NETWORK	KAMIKUBO_MYELOID_MN1_NETWORK		19	-0.39317286	-1.1875103	0.23134328	0.37296712	1	3457	tags=32%, list=19%, signal=39%
KYNG_RESPONSE_TO_H2O2_VIA_ERCC6_DN	KYNG_RESPONSE_TO_H2O2_VIA_ERCC6_DN		42	-0.33143526	-1.1873071	0.16410257	0.37289023	1	3656	tags=31%, list=20%, signal=39%
SCHUHMACHER_MYC_TARGETS_UP	SCHUHMACHER_MYC_TARGETS_UP		77	-0.29247165	-1.1870699	0.118421055	0.37291503	1	4231	tags=35%, list=23%, signal=46%
HOFFMANN_LARGE_TO_SMALL_PRE_BII_LYMPHOCYTE_DN	HOFFMANN_LARGE_TO_SMALL_PRE_BII_LYMPHOCYTE_DN		57	-0.3024854	-1.1860691	0.13636364	0.37445962	1	1575	tags=21%, list=9%, signal=23%
BOWIE_RESPONSE_TO_TAMOXIFEN	BOWIE_RESPONSE_TO_TAMOXIFEN		16	-0.42744583	-1.185755	0.2266187	0.37469736	1	1567	tags=31%, list=9%, signal=34%
DING_LUNG_CANCER_BY_MUTATION_RATE	DING_LUNG_CANCER_BY_MUTATION_RATE		18	-0.3883521	-1.1855975	0.21917808	0.3746214	1	657	tags=17%, list=4%, signal=17%
OSWALD_HEMATOPOIETIC_STEM_CELL_IN_COLLAGEN_GEL_UP	OSWALD_HEMATOPOIETIC_STEM_CELL_IN_COLLAGEN_GEL_UP		193	-0.26059037	-1.1849067	0.0952381	0.37563977	1	2100	tags=19%, list=12%, signal=21%
KEGG_CYTOSOLIC_DNA_SENSING_PATHWAY	KEGG_CYTOSOLIC_DNA_SENSING_PATHWAY		33	-0.34746295	-1.1834974	0.19565217	0.3779999	1	1256	tags=15%, list=7%, signal=16%
KONDO_PROSTATE_CANCER_WITH_H3K27ME3	KONDO_PROSTATE_CANCER_WITH_H3K27ME3		52	-0.3166041	-1.1830715	0.15	0.3784428	1	358	tags=12%, list=2%, signal=12%
WILSON_PROTEASES_AT_TUMOR_BONE_INTERFACE_UP	WILSON_PROTEASES_AT_TUMOR_BONE_INTERFACE_UP		17	-0.41125247	-1.1828998	0.24809161	0.37831762	1	109	tags=12%, list=1%, signal=12%
GAVIN_FOXP3_TARGETS_CLUSTER_T7	GAVIN_FOXP3_TARGETS_CLUSTER_T7		91	-0.288613	-1.1825864	0.1092437	0.3784854	1	4975	tags=42%, list=28%, signal=57%
ST_DIFFERENTIATION_PATHWAY_IN_PC12_CELLS	ST_DIFFERENTIATION_PATHWAY_IN_PC12_CELLS		41	-0.32572788	-1.1822845	0.22380953	0.3786418	1	2973	tags=27%, list=16%, signal=32%
ZAMORA_NOS2_TARGETS_UP	ZAMORA_NOS2_TARGETS_UP		64	-0.29293978	-1.1820872	0.09375	0.37861377	1	3722	tags=39%, list=21%, signal=49%
JAIN_NFKB_SIGNALING	JAIN_NFKB_SIGNALING		72	-0.2921593	-1.1809585	0.124087594	0.380523	1	3713	tags=33%, list=21%, signal=42%
DUTERTRE_ESTRADIOL_RESPONSE_6HR_UP	DUTERTRE_ESTRADIOL_RESPONSE_6HR_UP		209	-0.25253868	-1.1807067	0.02	0.38063428	1	3301	tags=32%, list=18%, signal=39%
BONOME_OVARIAN_CANCER_POOR_SURVIVAL_DN	BONOME_OVARIAN_CANCER_POOR_SURVIVAL_DN		21	-0.38161072	-1.180504	0.21374045	0.38064924	1	3450	tags=48%, list=19%, signal=59%
ROZANOV_MMP14_TARGETS_UP	ROZANOV_MMP14_TARGETS_UP		231	-0.24865896	-1.180119	0.074074075	0.38105023	1	1286	tags=15%, list=7%, signal=16%
NIELSEN_GIST	NIELSEN_GIST		87	-0.27935213	-1.1799951	0.10714286	0.3808531	1	2863	tags=30%, list=16%, signal=35%
WAGNER_APO2_SENSITIVITY	WAGNER_APO2_SENSITIVITY		15	-0.40880033	-1.1798111	0.22302158	0.3808477	1	2932	tags=27%, list=16%, signal=32%
MULLIGHAN_NPM1_MUTATED_SIGNATURE_1_DN	MULLIGHAN_NPM1_MUTATED_SIGNATURE_1_DN		107	-0.27126253	-1.1794223	0.125	0.3812723	1	1744	tags=17%, list=10%, signal=19%
MARTINEZ_RB1_TARGETS_DN	MARTINEZ_RB1_TARGETS_DN		427	-0.22709388	-1.1788048	0	0.38207754	1	3012	tags=22%, list=17%, signal=26%
YAO_TEMPORAL_RESPONSE_TO_PROGESTERONE_CLUSTER_14	YAO_TEMPORAL_RESPONSE_TO_PROGESTERONE_CLUSTER_14		137	-0.26205468	-1.1775334	0.09638554	0.38426286	1	4178	tags=35%, list=23%, signal=45%
TURASHVILI_BREAST_CARCINOMA_DUCTAL_VS_LOBULAR_UP	TURASHVILI_BREAST_CARCINOMA_DUCTAL_VS_LOBULAR_UP		15	-0.40250972	-1.1768588	0.21863799	0.38515225	1	1743	tags=33%, list=10%, signal=37%
WESTON_VEGFA_TARGETS_3HR	WESTON_VEGFA_TARGETS_3HR		58	-0.3178792	-1.1768254	0.16	0.3848058	1	743	tags=16%, list=4%, signal=16%
GOLDRATH_HOMEOSTATIC_PROLIFERATION	GOLDRATH_HOMEOSTATIC_PROLIFERATION		162	-0.25940353	-1.1765952	0.03773585	0.3848473	1	4310	tags=35%, list=24%, signal=46%
LEE_LIVER_CANCER_MYC_TGFA_UP	LEE_LIVER_CANCER_MYC_TGFA_UP		48	-0.31245652	-1.1759286	0.18539326	0.38573757	1	1917	tags=25%, list=11%, signal=28%
HERNANDEZ_ABERRANT_MITOSIS_BY_DOCETACEL_2NM_DN	HERNANDEZ_ABERRANT_MITOSIS_BY_DOCETACEL_2NM_DN		18	-0.39231995	-1.1755098	0.22807017	0.38613147	1	2341	tags=33%, list=13%, signal=38%
FULCHER_INFLAMMATORY_RESPONSE_LECTIN_VS_LPS_UP	FULCHER_INFLAMMATORY_RESPONSE_LECTIN_VS_LPS_UP		482	-0.24133839	-1.1751497	0	0.38642335	1	2874	tags=24%, list=16%, signal=28%
PID_RAC1_REG_PATHWAY	PID_RAC1_REG_PATHWAY		36	-0.3296466	-1.1747985	0.18421052	0.3866326	1	3225	tags=33%, list=18%, signal=41%
HEIDENBLAD_AMPLIFIED_IN_PANCREATIC_CANCER	HEIDENBLAD_AMPLIFIED_IN_PANCREATIC_CANCER		29	-0.35531253	-1.1735362	0.23451327	0.38873932	1	3479	tags=34%, list=19%, signal=43%
PARK_HSC_MARKERS	PARK_HSC_MARKERS		41	-0.3272153	-1.172909	0.16489361	0.3895807	1	4162	tags=32%, list=23%, signal=41%
DAIRKEE_CANCER_PRONE_RESPONSE_BPA	DAIRKEE_CANCER_PRONE_RESPONSE_BPA		45	-0.31596762	-1.1726012	0.15789473	0.3897353	1	4309	tags=38%, list=24%, signal=50%
FIGUEROA_AML_METHYLATION_CLUSTER_1_DN	FIGUEROA_AML_METHYLATION_CLUSTER_1_DN		32	-0.34032714	-1.172392	0.22535211	0.38979292	1	2348	tags=25%, list=13%, signal=29%
ALFANO_MYC_TARGETS	ALFANO_MYC_TARGETS		218	-0.25030205	-1.1722225	0.035714287	0.3897198	1	1543	tags=15%, list=9%, signal=16%
REACTOME_TGF_BETA_RECEPTOR_SIGNALING_ACTIVATES_SMADS	REACTOME_TGF_BETA_RECEPTOR_SIGNALING_ACTIVATES_SMADS		24	-0.36416453	-1.1719306	0.21428572	0.38988844	1	4682	tags=54%, list=26%, signal=73%
PID_AVB3_OPN_PATHWAY	PID_AVB3_OPN_PATHWAY		30	-0.35060933	-1.1718858	0.19491525	0.38957918	1	174	tags=10%, list=1%, signal=10%
WELCSH_BRCA1_TARGETS_DN	WELCSH_BRCA1_TARGETS_DN		137	-0.26758298	-1.1698573	0.08	0.39321056	1	4137	tags=35%, list=23%, signal=45%
GAUSSMANN_MLL_AF4_FUSION_TARGETS_A_UP	GAUSSMANN_MLL_AF4_FUSION_TARGETS_A_UP		171	-0.2494362	-1.1695963	0.09836066	0.3933077	1	1518	tags=18%, list=8%, signal=19%
WAKASUGI_HAVE_ZNF143_BINDING_SITES	WAKASUGI_HAVE_ZNF143_BINDING_SITES		58	-0.29970917	-1.1692084	0.225	0.39369258	1	3875	tags=38%, list=21%, signal=48%
TCGA_GLIOBLASTOMA_COPY_NUMBER_UP	TCGA_GLIOBLASTOMA_COPY_NUMBER_UP		66	-0.28747922	-1.1691924	0.15384616	0.39330268	1	2351	tags=24%, list=13%, signal=28%
NAKAMURA_CANCER_MICROENVIRONMENT_UP	NAKAMURA_CANCER_MICROENVIRONMENT_UP		15	-0.41601032	-1.1690503	0.24904214	0.39315298	1	604	tags=27%, list=3%, signal=28%
REACTOME_SIGNALING_BY_NOTCH	REACTOME_SIGNALING_BY_NOTCH		93	-0.2759139	-1.1684049	0.12307692	0.3941485	1	1597	tags=17%, list=9%, signal=19%
PID_PI3K_PLC_TRK_PATHWAY	PID_PI3K_PLC_TRK_PATHWAY		32	-0.33445722	-1.1683816	0.2028302	0.3937667	1	2294	tags=22%, list=13%, signal=25%
HOEGERKORP_CD44_TARGETS_DIRECT_UP	HOEGERKORP_CD44_TARGETS_DIRECT_UP		21	-0.3618779	-1.1682202	0.24050634	0.39365184	1	2621	tags=43%, list=15%, signal=50%
GRAESSMANN_RESPONSE_TO_MC_AND_SERUM_DEPRIVATION_DN	GRAESSMANN_RESPONSE_TO_MC_AND_SERUM_DEPRIVATION_DN		72	-0.29059625	-1.16779	0.12587413	0.39414617	1	1806	tags=24%, list=10%, signal=26%
WILENSKY_RESPONSE_TO_DARAPLADIB	WILENSKY_RESPONSE_TO_DARAPLADIB		17	-0.40248534	-1.1677179	0.24909747	0.3938778	1	161	tags=12%, list=1%, signal=12%
SERVITJA_LIVER_HNF1A_TARGETS_DN	SERVITJA_LIVER_HNF1A_TARGETS_DN		88	-0.2737575	-1.1674471	0.10948905	0.3940079	1	1321	tags=19%, list=7%, signal=21%
WANG_RESPONSE_TO_BEXAROTENE_UP	WANG_RESPONSE_TO_BEXAROTENE_UP		26	-0.35624948	-1.1656417	0.22983871	0.3972408	1	2233	tags=27%, list=12%, signal=31%
HOFFMANN_SMALL_PRE_BII_TO_IMMATURE_B_LYMPHOCYTE_UP	HOFFMANN_SMALL_PRE_BII_TO_IMMATURE_B_LYMPHOCYTE_UP		49	-0.30768186	-1.1629659	0.19895288	0.40236512	1	2058	tags=22%, list=11%, signal=25%
HERNANDEZ_ABERRANT_MITOSIS_BY_DOCETACEL_2NM_UP	HERNANDEZ_ABERRANT_MITOSIS_BY_DOCETACEL_2NM_UP		63	-0.29376894	-1.1626737	0.16	0.4025676	1	2209	tags=30%, list=12%, signal=34%
WATANABE_COLON_CANCER_MSI_VS_MSS_UP	WATANABE_COLON_CANCER_MSI_VS_MSS_UP		20	-0.37906533	-1.1620126	0.23529412	0.40349817	1	2911	tags=45%, list=16%, signal=54%
CHNG_MULTIPLE_MYELOMA_HYPERPLOID_UP	CHNG_MULTIPLE_MYELOMA_HYPERPLOID_UP		50	-0.30633762	-1.1604666	0.19774011	0.40630406	1	10372	tags=96%, list=58%, signal=225%
KEGG_SPLICEOSOME	KEGG_SPLICEOSOME		124	-0.26629776	-1.160213	0.1125	0.40639734	1	4072	tags=37%, list=23%, signal=48%
SIMBULAN_UV_RESPONSE_NORMAL_DN	SIMBULAN_UV_RESPONSE_NORMAL_DN		30	-0.34289896	-1.1601325	0.22123894	0.40615547	1	1057	tags=23%, list=6%, signal=25%
BIOCARTA_NDKDYNAMIN_PATHWAY	BIOCARTA_NDKDYNAMIN_PATHWAY		16	-0.41376677	-1.1599345	0.24468085	0.40609986	1	3857	tags=44%, list=21%, signal=56%
PLASARI_TGFB1_SIGNALING_VIA_NFIC_10HR_DN	PLASARI_TGFB1_SIGNALING_VIA_NFIC_10HR_DN		25	-0.35665876	-1.1599194	0.232	0.40570417	1	2782	tags=48%, list=15%, signal=57%
PID_HIF1A_PATHWAY	PID_HIF1A_PATHWAY		19	-0.37361065	-1.1598511	0.24125874	0.40544042	1	4541	tags=42%, list=25%, signal=56%
ZHU_CMV_ALL_UP	ZHU_CMV_ALL_UP		112	-0.2651084	-1.1597892	0.09195402	0.40517312	1	3819	tags=39%, list=21%, signal=50%
RAMALHO_STEMNESS_UP	RAMALHO_STEMNESS_UP		200	-0.24540173	-1.159723	0.083333336	0.4049193	1	3480	tags=24%, list=19%, signal=29%
KEGG_NEUROTROPHIN_SIGNALING_PATHWAY	KEGG_NEUROTROPHIN_SIGNALING_PATHWAY		116	-0.26475284	-1.1594802	0.09411765	0.40498608	1	3698	tags=31%, list=21%, signal=39%
DELYS_THYROID_CANCER_UP	DELYS_THYROID_CANCER_UP		353	-0.24115714	-1.1588814	0	0.4058188	1	2326	tags=24%, list=13%, signal=26%
GUO_TARGETS_OF_IRS1_AND_IRS2	GUO_TARGETS_OF_IRS1_AND_IRS2		86	-0.27354053	-1.157791	0.17054264	0.40753603	1	4117	tags=36%, list=23%, signal=46%
FURUKAWA_DUSP6_TARGETS_PCI35_UP	FURUKAWA_DUSP6_TARGETS_PCI35_UP		52	-0.3029703	-1.1568599	0.16883117	0.4090778	1	2641	tags=29%, list=15%, signal=34%
VALK_AML_CLUSTER_10	VALK_AML_CLUSTER_10		27	-0.34860006	-1.1561477	0.24255319	0.4100771	1	462	tags=15%, list=3%, signal=15%
GRABARCZYK_BCL11B_TARGETS_UP	GRABARCZYK_BCL11B_TARGETS_UP		66	-0.29250777	-1.1560355	0.1986755	0.40988716	1	3457	tags=33%, list=19%, signal=41%
LEE_TARGETS_OF_PTCH1_AND_SUFU_UP	LEE_TARGETS_OF_PTCH1_AND_SUFU_UP		45	-0.3142351	-1.155879	0.21387284	0.40976298	1	3582	tags=42%, list=20%, signal=53%
RICKMAN_METASTASIS_DN	RICKMAN_METASTASIS_DN		212	-0.23978488	-1.1552724	0.102564104	0.41064695	1	2906	tags=23%, list=16%, signal=27%
CROMER_METASTASIS_DN	CROMER_METASTASIS_DN		70	-0.28964153	-1.1544353	0.22222222	0.41204306	1	4142	tags=31%, list=23%, signal=41%
REACTOME_KERATAN_SULFATE_BIOSYNTHESIS	REACTOME_KERATAN_SULFATE_BIOSYNTHESIS		19	-0.3821074	-1.1544348	0.2331081	0.41162387	1	495	tags=16%, list=3%, signal=16%
MIKKELSEN_MCV6_LCP_WITH_H3K4ME3	MIKKELSEN_MCV6_LCP_WITH_H3K4ME3		102	-0.26560384	-1.1543549	0.12068965	0.4113615	1	2821	tags=31%, list=16%, signal=37%
SARTIPY_NORMAL_AT_INSULIN_RESISTANCE_UP	SARTIPY_NORMAL_AT_INSULIN_RESISTANCE_UP		32	-0.3307474	-1.1535654	0.21538462	0.41262797	1	1864	tags=28%, list=10%, signal=31%
BIOCARTA_ACTINY_PATHWAY	BIOCARTA_ACTINY_PATHWAY		20	-0.37769178	-1.1531055	0.2783883	0.41319105	1	4017	tags=40%, list=22%, signal=51%
LIU_NASOPHARYNGEAL_CARCINOMA	LIU_NASOPHARYNGEAL_CARCINOMA		60	-0.29177716	-1.1529847	0.17307693	0.4130295	1	3993	tags=38%, list=22%, signal=49%
PID_AR_PATHWAY	PID_AR_PATHWAY		55	-0.29737318	-1.1528399	0.1849315	0.4128907	1	4084	tags=38%, list=23%, signal=49%
HU_GENOTOXIN_ACTION_DIRECT_VS_INDIRECT_24HR	HU_GENOTOXIN_ACTION_DIRECT_VS_INDIRECT_24HR		49	-0.3093257	-1.1526476	0.21311475	0.41288713	1	2909	tags=29%, list=16%, signal=34%
GOTZMANN_EPITHELIAL_TO_MESENCHYMAL_TRANSITION_DN	GOTZMANN_EPITHELIAL_TO_MESENCHYMAL_TRANSITION_DN		176	-0.24728873	-1.1524209	0.09090909	0.41292822	1	2844	tags=22%, list=16%, signal=25%
BROWNE_HCMV_INFECTION_14HR_DN	BROWNE_HCMV_INFECTION_14HR_DN		258	-0.22463365	-1.152319	0.037037037	0.41268444	1	2424	tags=21%, list=13%, signal=24%
VIETOR_IFRD1_TARGETS	VIETOR_IFRD1_TARGETS		19	-0.38464355	-1.1521703	0.248	0.41261107	1	1756	tags=32%, list=10%, signal=35%
REACTOME_TRANSCRIPTIONAL_ACTIVITY_OF_SMAD2_SMAD3_SMAD4_HETEROTRIMER	REACTOME_TRANSCRIPTIONAL_ACTIVITY_OF_SMAD2_SMAD3_SMAD4_HETEROTRIMER		36	-0.32117623	-1.1520289	0.22115384	0.41252372	1	4387	tags=47%, list=24%, signal=62%
KONDO_COLON_CANCER_HCP_WITH_H3K27ME1	KONDO_COLON_CANCER_HCP_WITH_H3K27ME1		24	-0.35674268	-1.1508778	0.21755725	0.4146846	1	2704	tags=25%, list=15%, signal=29%
SENESE_HDAC3_TARGETS_UP	SENESE_HDAC3_TARGETS_UP		455	-0.22338514	-1.1507813	0	0.41444728	1	2516	tags=21%, list=14%, signal=24%
CHIARADONNA_NEOPLASTIC_TRANSFORMATION_KRAS_CDC25_DN	CHIARADONNA_NEOPLASTIC_TRANSFORMATION_KRAS_CDC25_DN		43	-0.30915958	-1.1494088	0.20212767	0.41684896	1	1304	tags=21%, list=7%, signal=23%
PID_LIS1_PATHWAY	PID_LIS1_PATHWAY		26	-0.35497487	-1.1493773	0.25110132	0.4165179	1	371	tags=8%, list=2%, signal=8%
KEGG_AXON_GUIDANCE	KEGG_AXON_GUIDANCE		120	-0.25934646	-1.1493418	0.12790698	0.41615754	1	3074	tags=29%, list=17%, signal=35%
HOLLEMAN_ASPARAGINASE_RESISTANCE_ALL_UP	HOLLEMAN_ASPARAGINASE_RESISTANCE_ALL_UP		21	-0.37538797	-1.1489733	0.23109244	0.4165717	1	4	tags=5%, list=0%, signal=5%
CHEN_HOXA5_TARGETS_9HR_DN	CHEN_HOXA5_TARGETS_9HR_DN		38	-0.3195897	-1.1489059	0.20192307	0.41631255	1	2426	tags=21%, list=13%, signal=24%
REACTOME_NOD1_2_SIGNALING_PATHWAY	REACTOME_NOD1_2_SIGNALING_PATHWAY		28	-0.3408539	-1.1476136	0.2581967	0.4186126	1	3877	tags=46%, list=21%, signal=59%
FARMER_BREAST_CANCER_APOCRINE_VS_BASAL	FARMER_BREAST_CANCER_APOCRINE_VS_BASAL		290	-0.22933637	-1.1463573	0.05882353	0.42080447	1	3297	tags=29%, list=18%, signal=34%
KEGG_P53_SIGNALING_PATHWAY	KEGG_P53_SIGNALING_PATHWAY		61	-0.2898495	-1.1461705	0.16470589	0.42079425	1	3128	tags=39%, list=17%, signal=47%
LEE_CALORIE_RESTRICTION_MUSCLE_UP	LEE_CALORIE_RESTRICTION_MUSCLE_UP		31	-0.3284951	-1.1451045	0.23557693	0.42258644	1	4735	tags=55%, list=26%, signal=74%
REACTOME_ASSOCIATION_OF_TRIC_CCT_WITH_TARGET_PROTEINS_DURING_BIOSYNTHESIS	REACTOME_ASSOCIATION_OF_TRIC_CCT_WITH_TARGET_PROTEINS_DURING_BIOSYNTHESIS		26	-0.3585549	-1.1450204	0.24311927	0.42232805	1	5049	tags=58%, list=28%, signal=80%
KIM_GERMINAL_CENTER_T_HELPER_UP	KIM_GERMINAL_CENTER_T_HELPER_UP		55	-0.29239538	-1.1446003	0.23756906	0.42278987	1	3303	tags=33%, list=18%, signal=40%
PID_BETA_CATENIN_NUC_PATHWAY	PID_BETA_CATENIN_NUC_PATHWAY		65	-0.28572628	-1.1444799	0.232	0.4225901	1	2303	tags=20%, list=13%, signal=23%
ROME_INSULIN_TARGETS_IN_MUSCLE_UP	ROME_INSULIN_TARGETS_IN_MUSCLE_UP		407	-0.21859811	-1.1441834	0	0.422811	1	4335	tags=33%, list=24%, signal=43%
TONKS_TARGETS_OF_RUNX1_RUNX1T1_FUSION_ERYTHROCYTE_UP	TONKS_TARGETS_OF_RUNX1_RUNX1T1_FUSION_ERYTHROCYTE_UP		120	-0.25615188	-1.143727	0.15476191	0.42339623	1	2079	tags=23%, list=12%, signal=25%
REACTOME_SIGNALLING_BY_NGF	REACTOME_SIGNALLING_BY_NGF		198	-0.23649871	-1.1436633	0.14285715	0.4231065	1	3132	tags=23%, list=17%, signal=28%
OSMAN_BLADDER_CANCER_UP	OSMAN_BLADDER_CANCER_UP		371	-0.22895898	-1.1428325	0	0.42436662	1	3795	tags=29%, list=21%, signal=35%
SMIRNOV_RESPONSE_TO_IR_2HR_DN	SMIRNOV_RESPONSE_TO_IR_2HR_DN		51	-0.30119386	-1.1426129	0.1827957	0.4243938	1	1791	tags=24%, list=10%, signal=26%
RAO_BOUND_BY_SALL4	RAO_BOUND_BY_SALL4		186	-0.24588495	-1.1424977	0.11320755	0.42423314	1	2593	tags=24%, list=14%, signal=27%
YAO_TEMPORAL_RESPONSE_TO_PROGESTERONE_CLUSTER_15	YAO_TEMPORAL_RESPONSE_TO_PROGESTERONE_CLUSTER_15		32	-0.33565706	-1.1409961	0.2085308	0.42720968	1	2783	tags=41%, list=15%, signal=48%
UEDA_PERIFERAL_CLOCK	UEDA_PERIFERAL_CLOCK		151	-0.24194314	-1.1409599	0.13207547	0.42686653	1	2506	tags=21%, list=14%, signal=24%
SHEDDEN_LUNG_CANCER_GOOD_SURVIVAL_A5	SHEDDEN_LUNG_CANCER_GOOD_SURVIVAL_A5		63	-0.2838629	-1.1398284	0.20567375	0.4289145	1	761	tags=8%, list=4%, signal=8%
WU_HBX_TARGETS_2_UP	WU_HBX_TARGETS_2_UP		21	-0.36016694	-1.1397523	0.2631579	0.42863336	1	1326	tags=19%, list=7%, signal=21%
HONMA_DOCETAXEL_RESISTANCE	HONMA_DOCETAXEL_RESISTANCE		34	-0.33182347	-1.1396633	0.21782178	0.42835328	1	5009	tags=44%, list=28%, signal=61%
PID_INTEGRIN_CS_PATHWAY	PID_INTEGRIN_CS_PATHWAY		22	-0.36149445	-1.1395998	0.25416666	0.42810068	1	1516	tags=27%, list=8%, signal=30%
REN_ALVEOLAR_RHABDOMYOSARCOMA_UP	REN_ALVEOLAR_RHABDOMYOSARCOMA_UP		78	-0.2729929	-1.1391811	0.20472442	0.42857835	1	1548	tags=23%, list=9%, signal=25%
BROWNE_HCMV_INFECTION_8HR_DN	BROWNE_HCMV_INFECTION_8HR_DN		39	-0.31803852	-1.1391346	0.19626169	0.42825115	1	1993	tags=26%, list=11%, signal=29%
BROWNE_HCMV_INFECTION_14HR_UP	BROWNE_HCMV_INFECTION_14HR_UP		144	-0.24969172	-1.1384565	0.14925373	0.42930284	1	2625	tags=22%, list=15%, signal=25%
KARLSSON_TGFB1_TARGETS_UP	KARLSSON_TGFB1_TARGETS_UP		120	-0.2567993	-1.1384177	0.14606741	0.4289576	1	3651	tags=30%, list=20%, signal=37%
SHETH_LIVER_CANCER_VS_TXNIP_LOSS_PAM6	SHETH_LIVER_CANCER_VS_TXNIP_LOSS_PAM6		42	-0.3113151	-1.1376328	0.24120604	0.43025613	1	1751	tags=21%, list=10%, signal=24%
CORRE_MULTIPLE_MYELOMA_UP	CORRE_MULTIPLE_MYELOMA_UP		54	-0.29269853	-1.1369277	0.21176471	0.43141297	1	1652	tags=26%, list=9%, signal=28%
REACTOME_INNATE_IMMUNE_SYSTEM	REACTOME_INNATE_IMMUNE_SYSTEM		179	-0.23726016	-1.1366086	0.075	0.43175158	1	3017	tags=23%, list=17%, signal=27%
RICKMAN_HEAD_AND_NECK_CANCER_C	RICKMAN_HEAD_AND_NECK_CANCER_C		48	-0.304456	-1.1361254	0.20710059	0.4323698	1	1112	tags=21%, list=6%, signal=22%
ZHAN_MULTIPLE_MYELOMA_MF_DN	ZHAN_MULTIPLE_MYELOMA_MF_DN		35	-0.32306588	-1.1351254	0.2489083	0.43410322	1	2018	tags=23%, list=11%, signal=26%
FARMER_BREAST_CANCER_BASAL_VS_LULMINAL	FARMER_BREAST_CANCER_BASAL_VS_LULMINAL		287	-0.22780496	-1.1348563	0.055555556	0.43425837	1	3085	tags=26%, list=17%, signal=31%
DEURIG_T_CELL_PROLYMPHOCYTIC_LEUKEMIA_UP	DEURIG_T_CELL_PROLYMPHOCYTIC_LEUKEMIA_UP		306	-0.22930443	-1.1348013	0.071428575	0.43396327	1	3032	tags=26%, list=17%, signal=31%
GHANDHI_DIRECT_IRRADIATION_DN	GHANDHI_DIRECT_IRRADIATION_DN		29	-0.34894222	-1.1338038	0.21463415	0.43579176	1	1775	tags=24%, list=10%, signal=27%
TERAMOTO_OPN_TARGETS_CLUSTER_6	TERAMOTO_OPN_TARGETS_CLUSTER_6		25	-0.35191876	-1.1336056	0.24786325	0.43586704	1	1041	tags=20%, list=6%, signal=21%
KOKKINAKIS_METHIONINE_DEPRIVATION_96HR_UP	KOKKINAKIS_METHIONINE_DEPRIVATION_96HR_UP		108	-0.25574008	-1.1331509	0.1827957	0.43644407	1	3840	tags=36%, list=21%, signal=46%
BRUNO_HEMATOPOIESIS	BRUNO_HEMATOPOIESIS		57	-0.2961983	-1.1331129	0.23837209	0.43611997	1	4325	tags=47%, list=24%, signal=62%
HEDENFALK_BREAST_CANCER_BRACX_DN	HEDENFALK_BREAST_CANCER_BRACX_DN		20	-0.36687112	-1.1322846	0.26923078	0.43760574	1	2141	tags=20%, list=12%, signal=23%
LEE_LIVER_CANCER_MYC_E2F1_UP	LEE_LIVER_CANCER_MYC_E2F1_UP		40	-0.32119218	-1.1320478	0.22274882	0.43769807	1	2068	tags=28%, list=11%, signal=31%
REACTOME_PHOSPHORYLATION_OF_THE_APC_C	REACTOME_PHOSPHORYLATION_OF_THE_APC_C		17	-0.38455045	-1.1315502	0.2934363	0.4383512	1	3236	tags=29%, list=18%, signal=36%
PANGAS_TUMOR_SUPPRESSION_BY_SMAD1_AND_SMAD5_DN	PANGAS_TUMOR_SUPPRESSION_BY_SMAD1_AND_SMAD5_DN		139	-0.25423965	-1.1314995	0.11956522	0.43800277	1	3877	tags=30%, list=21%, signal=38%
VALK_AML_CLUSTER_11	VALK_AML_CLUSTER_11		29	-0.33369246	-1.1312591	0.2625	0.43812957	1	3853	tags=48%, list=21%, signal=61%
GUO_HEX_TARGETS_DN	GUO_HEX_TARGETS_DN		50	-0.3013794	-1.1305337	0.22285715	0.43931013	1	2940	tags=26%, list=16%, signal=31%
MARTORIATI_MDM4_TARGETS_FETAL_LIVER_DN	MARTORIATI_MDM4_TARGETS_FETAL_LIVER_DN		465	-0.22897111	-1.1304402	0	0.43908074	1	3579	tags=26%, list=20%, signal=31%
PID_CD8_TCR_DOWNSTREAM_PATHWAY	PID_CD8_TCR_DOWNSTREAM_PATHWAY		36	-0.32129684	-1.1301804	0.2565445	0.43922117	1	3012	tags=28%, list=17%, signal=33%
VANLOO_SP3_TARGETS_DN	VANLOO_SP3_TARGETS_DN		65	-0.28446427	-1.1300269	0.23448277	0.4391536	1	1353	tags=17%, list=8%, signal=18%
NAKAMURA_ADIPOGENESIS_LATE_UP	NAKAMURA_ADIPOGENESIS_LATE_UP		91	-0.26314744	-1.1297493	0.13392857	0.43937415	1	3126	tags=27%, list=17%, signal=33%
ASTON_MAJOR_DEPRESSIVE_DISORDER_UP	ASTON_MAJOR_DEPRESSIVE_DISORDER_UP		40	-0.31386575	-1.1291173	0.2451923	0.44040772	1	1118	tags=13%, list=6%, signal=13%
AGUIRRE_PANCREATIC_CANCER_COPY_NUMBER_DN	AGUIRRE_PANCREATIC_CANCER_COPY_NUMBER_DN		224	-0.24175945	-1.1290272	0.121212125	0.44020787	1	3575	tags=27%, list=20%, signal=33%
SANSOM_APC_TARGETS	SANSOM_APC_TARGETS		166	-0.23833744	-1.1289241	0.14545454	0.4400438	1	2482	tags=21%, list=14%, signal=24%
MCBRYAN_PUBERTAL_TGFB1_TARGETS_DN	MCBRYAN_PUBERTAL_TGFB1_TARGETS_DN		47	-0.30483398	-1.1275957	0.20873787	0.44263512	1	3573	tags=38%, list=20%, signal=48%
ZHAN_MULTIPLE_MYELOMA_CD1_VS_CD2_DN	ZHAN_MULTIPLE_MYELOMA_CD1_VS_CD2_DN		40	-0.3083198	-1.1275873	0.26130652	0.44223738	1	2728	tags=30%, list=15%, signal=35%
KEGG_TRYPTOPHAN_METABOLISM	KEGG_TRYPTOPHAN_METABOLISM		30	-0.3371304	-1.126225	0.26633167	0.44479743	1	255	tags=10%, list=1%, signal=10%
LANDIS_ERBB2_BREAST_TUMORS_324_UP	LANDIS_ERBB2_BREAST_TUMORS_324_UP		135	-0.25212118	-1.1258165	0.17910448	0.44541848	1	3369	tags=28%, list=19%, signal=34%
BOYLAN_MULTIPLE_MYELOMA_PCA1_UP	BOYLAN_MULTIPLE_MYELOMA_PCA1_UP		51	-0.30053312	-1.1255614	0.2606383	0.44556138	1	1870	tags=24%, list=10%, signal=26%
REACTOME_CELL_SURFACE_INTERACTIONS_AT_THE_VASCULAR_WALL	REACTOME_CELL_SURFACE_INTERACTIONS_AT_THE_VASCULAR_WALL		59	-0.29535744	-1.1252128	0.22516556	0.445822	1	1048	tags=12%, list=6%, signal=13%
DIRMEIER_LMP1_RESPONSE_LATE_DN	DIRMEIER_LMP1_RESPONSE_LATE_DN		28	-0.340956	-1.1250652	0.27192983	0.4456914	1	673	tags=14%, list=4%, signal=15%
BURTON_ADIPOGENESIS_PEAK_AT_0HR	BURTON_ADIPOGENESIS_PEAK_AT_0HR		53	-0.2869367	-1.1247629	0.21787709	0.44605136	1	3022	tags=34%, list=17%, signal=41%
LI_INDUCED_T_TO_NATURAL_KILLER_UP	LI_INDUCED_T_TO_NATURAL_KILLER_UP		235	-0.23474996	-1.1247025	0.09677419	0.4457767	1	2721	tags=26%, list=15%, signal=30%
KEGG_CYTOKINE_CYTOKINE_RECEPTOR_INTERACTION	KEGG_CYTOKINE_CYTOKINE_RECEPTOR_INTERACTION		123	-0.2583591	-1.1240969	0.18055555	0.44674218	1	2429	tags=28%, list=13%, signal=32%
LE_NEURONAL_DIFFERENTIATION_UP	LE_NEURONAL_DIFFERENTIATION_UP		16	-0.39360985	-1.1233069	0.3	0.44815958	1	1814	tags=38%, list=10%, signal=42%
TRAYNOR_RETT_SYNDROM_UP	TRAYNOR_RETT_SYNDROM_UP		35	-0.3172247	-1.1227299	0.21022727	0.44896892	1	1576	tags=26%, list=9%, signal=28%
KIM_WT1_TARGETS_12HR_UP	KIM_WT1_TARGETS_12HR_UP		147	-0.2458933	-1.1226392	0.16216215	0.44874114	1	2778	tags=31%, list=15%, signal=36%
HUI_MAPK14_TARGETS_UP	HUI_MAPK14_TARGETS_UP		17	-0.389629	-1.12203	0.2783883	0.4497161	1	673	tags=12%, list=4%, signal=12%
KUROKAWA_LIVER_CANCER_CHEMOTHERAPY_DN	KUROKAWA_LIVER_CANCER_CHEMOTHERAPY_DN		37	-0.31613758	-1.1213162	0.26804122	0.45093223	1	2933	tags=38%, list=16%, signal=45%
STAMBOLSKY_TARGETS_OF_MUTATED_TP53_DN	STAMBOLSKY_TARGETS_OF_MUTATED_TP53_DN		42	-0.29996997	-1.1213067	0.26732674	0.45052576	1	3311	tags=38%, list=18%, signal=47%
REACTOME_ADAPTIVE_IMMUNE_SYSTEM	REACTOME_ADAPTIVE_IMMUNE_SYSTEM		432	-0.22155085	-1.1210692	0.14285715	0.450634	1	3899	tags=28%, list=22%, signal=35%
SCHLESINGER_METHYLATED_DE_NOVO_IN_CANCER	SCHLESINGER_METHYLATED_DE_NOVO_IN_CANCER		62	-0.27790824	-1.1209613	0.22516556	0.450459	1	1179	tags=16%, list=7%, signal=17%
RODWELL_AGING_KIDNEY_UP	RODWELL_AGING_KIDNEY_UP		375	-0.2231823	-1.1207075	0	0.4505935	1	2334	tags=22%, list=13%, signal=25%
PID_NCADHERIN_PATHWAY	PID_NCADHERIN_PATHWAY		31	-0.33381784	-1.1200012	0.28019324	0.45177522	1	2619	tags=26%, list=15%, signal=30%
MARKEY_RB1_CHRONIC_LOF_DN	MARKEY_RB1_CHRONIC_LOF_DN		82	-0.26895744	-1.119433	0.1971831	0.45261565	1	779	tags=12%, list=4%, signal=13%
MONNIER_POSTRADIATION_TUMOR_ESCAPE_DN	MONNIER_POSTRADIATION_TUMOR_ESCAPE_DN		339	-0.22843556	-1.1189622	0.05882353	0.4533233	1	3053	tags=29%, list=17%, signal=34%
GRADE_COLON_VS_RECTAL_CANCER_UP	GRADE_COLON_VS_RECTAL_CANCER_UP		30	-0.33957258	-1.1188921	0.26222223	0.45306015	1	2421	tags=40%, list=13%, signal=46%
MOHANKUMAR_TLX1_TARGETS_UP	MOHANKUMAR_TLX1_TARGETS_UP		381	-0.21752603	-1.1177692	0	0.4551605	1	3040	tags=24%, list=17%, signal=28%
REACTOME_TRAF6_MEDIATED_INDUCTION_OF_NFKB_AND_MAP_KINASES_UPON_TLR7_8_OR_9_ACTIVATION	REACTOME_TRAF6_MEDIATED_INDUCTION_OF_NFKB_AND_MAP_KINASES_UPON_TLR7_8_OR_9_ACTIVATION		71	-0.2852998	-1.1176901	0.2535211	0.45491982	1	4026	tags=34%, list=22%, signal=43%
FOSTER_TOLERANT_MACROPHAGE_DN	FOSTER_TOLERANT_MACROPHAGE_DN		363	-0.22315194	-1.1173291	0.11111111	0.45522767	1	3179	tags=30%, list=18%, signal=36%
MORI_IMMATURE_B_LYMPHOCYTE_UP	MORI_IMMATURE_B_LYMPHOCYTE_UP		44	-0.29933992	-1.1170497	0.22660099	0.45538214	1	3426	tags=39%, list=19%, signal=48%
REACTOME_INHIBITION_OF_THE_PROTEOLYTIC_ACTIVITY_OF_APC_C_REQUIRED_FOR_THE_ONSET_OF_ANAPHASE_BY_MITOTIC_SPINDLE_CHECKPOINT_COMPONENTS	REACTOME_INHIBITION_OF_THE_PROTEOLYTIC_ACTIVITY_OF_APC_C_REQUIRED_FOR_THE_ONSET_OF_ANAPHASE_BY_MITOTIC_SPINDLE_CHECKPOINT_COMPONENTS		18	-0.37975493	-1.1168222	0.29411766	0.4554663	1	3236	tags=33%, list=18%, signal=41%
TORCHIA_TARGETS_OF_EWSR1_FLI1_FUSION_DN	TORCHIA_TARGETS_OF_EWSR1_FLI1_FUSION_DN		278	-0.22562106	-1.1167411	0.09090909	0.45524713	1	2811	tags=26%, list=16%, signal=30%
KEGG_ECM_RECEPTOR_INTERACTION	KEGG_ECM_RECEPTOR_INTERACTION		72	-0.26602837	-1.116032	0.19463088	0.45659366	1	2325	tags=26%, list=13%, signal=30%
GENTILE_UV_RESPONSE_CLUSTER_D7	GENTILE_UV_RESPONSE_CLUSTER_D7		39	-0.31265876	-1.1158078	0.22580644	0.45666653	1	3974	tags=44%, list=22%, signal=56%
PID_KIT_PATHWAY	PID_KIT_PATHWAY		48	-0.28744525	-1.1157744	0.22222222	0.45632	1	3192	tags=27%, list=18%, signal=33%
SMID_BREAST_CANCER_RELAPSE_IN_LUNG_DN	SMID_BREAST_CANCER_RELAPSE_IN_LUNG_DN		17	-0.3803464	-1.1154791	0.2753623	0.45663416	1	552	tags=18%, list=3%, signal=18%
FARMER_BREAST_CANCER_APOCRINE_VS_LUMINAL	FARMER_BREAST_CANCER_APOCRINE_VS_LUMINAL		277	-0.22800945	-1.1151023	0	0.45708698	1	2772	tags=24%, list=15%, signal=28%
DAZARD_UV_RESPONSE_CLUSTER_G6	DAZARD_UV_RESPONSE_CLUSTER_G6		145	-0.25160357	-1.1149184	0.14285715	0.45704773	1	2954	tags=26%, list=16%, signal=30%
LINSLEY_MIR16_TARGETS	LINSLEY_MIR16_TARGETS		193	-0.24061689	-1.1139274	0.19607843	0.45879528	1	2886	tags=24%, list=16%, signal=29%
KEGG_TYROSINE_METABOLISM	KEGG_TYROSINE_METABOLISM		30	-0.32956752	-1.1135405	0.26046512	0.45922643	1	133	tags=10%, list=1%, signal=10%
TSENG_IRS1_TARGETS_UP	TSENG_IRS1_TARGETS_UP		95	-0.25977486	-1.1131874	0.18644068	0.4596008	1	2471	tags=22%, list=14%, signal=25%
MULLIGAN_NTF3_SIGNALING_VIA_INSR_AND_IGF1R_UP	MULLIGAN_NTF3_SIGNALING_VIA_INSR_AND_IGF1R_UP		22	-0.35252607	-1.110754	0.25	0.4650097	1	3719	tags=32%, list=21%, signal=40%
YU_MYC_TARGETS_DN	YU_MYC_TARGETS_DN		37	-0.3087582	-1.110355	0.25358853	0.4655518	1	2118	tags=30%, list=12%, signal=34%
GRAESSMANN_APOPTOSIS_BY_SERUM_DEPRIVATION_DN	GRAESSMANN_APOPTOSIS_BY_SERUM_DEPRIVATION_DN		197	-0.23780766	-1.109861	0.1904762	0.4662635	1	1814	tags=21%, list=10%, signal=23%
REACTOME_CD28_CO_STIMULATION	REACTOME_CD28_CO_STIMULATION		26	-0.3311955	-1.1093403	0.25957447	0.4669071	1	774	tags=8%, list=4%, signal=8%
BENPORATH_NOS_TARGETS	BENPORATH_NOS_TARGETS		156	-0.24394795	-1.1084461	0.17307693	0.46865046	1	2293	tags=21%, list=13%, signal=23%
LEE_LIVER_CANCER_DENA_UP	LEE_LIVER_CANCER_DENA_UP		44	-0.30383667	-1.1084236	0.29032257	0.46826178	1	2340	tags=25%, list=13%, signal=29%
HUTTMANN_B_CLL_POOR_SURVIVAL_UP	HUTTMANN_B_CLL_POOR_SURVIVAL_UP		227	-0.23677944	-1.1066571	0.1764706	0.4719742	1	1698	tags=17%, list=9%, signal=18%
GALE_APL_WITH_FLT3_MUTATED_UP	GALE_APL_WITH_FLT3_MUTATED_UP		54	-0.28492758	-1.1066276	0.2969697	0.47160897	1	4390	tags=39%, list=24%, signal=51%
KIM_WT1_TARGETS_DN	KIM_WT1_TARGETS_DN		424	-0.22540146	-1.1062785	0	0.4720165	1	3781	tags=32%, list=21%, signal=39%
BIOCARTA_DEATH_PATHWAY	BIOCARTA_DEATH_PATHWAY		31	-0.32613766	-1.1034058	0.31651375	0.4785581	1	1936	tags=23%, list=11%, signal=25%
REACTOME_NEGATIVE_REGULATORS_OF_RIG_I_MDA5_SIGNALING	REACTOME_NEGATIVE_REGULATORS_OF_RIG_I_MDA5_SIGNALING		29	-0.31832084	-1.1032529	0.24657534	0.47851872	1	4315	tags=45%, list=24%, signal=59%
VILIMAS_NOTCH1_TARGETS_UP	VILIMAS_NOTCH1_TARGETS_UP		30	-0.3203269	-1.1028054	0.29338843	0.4791091	1	2421	tags=30%, list=13%, signal=35%
ABE_VEGFA_TARGETS_30MIN	ABE_VEGFA_TARGETS_30MIN		23	-0.34223673	-1.1025952	0.27731094	0.47923353	1	1689	tags=26%, list=9%, signal=29%
HOLLEMAN_VINCRISTINE_RESISTANCE_B_ALL_DN	HOLLEMAN_VINCRISTINE_RESISTANCE_B_ALL_DN		15	-0.3803986	-1.1025687	0.3068182	0.47884345	1	3140	tags=33%, list=17%, signal=40%
BIOCARTA_NFKB_PATHWAY	BIOCARTA_NFKB_PATHWAY		22	-0.353849	-1.1023856	0.3071161	0.47884157	1	823	tags=14%, list=5%, signal=14%
MAYBURD_RESPONSE_TO_L663536_DN	MAYBURD_RESPONSE_TO_L663536_DN		51	-0.29320106	-1.102254	0.22981367	0.4787014	1	4130	tags=37%, list=23%, signal=48%
NIELSEN_GIST_AND_SYNOVIAL_SARCOMA_UP	NIELSEN_GIST_AND_SYNOVIAL_SARCOMA_UP		19	-0.373758	-1.1021036	0.32307693	0.47862065	1	312	tags=11%, list=2%, signal=11%
SCHLOSSER_MYC_TARGETS_REPRESSED_BY_SERUM	SCHLOSSER_MYC_TARGETS_REPRESSED_BY_SERUM		153	-0.24410725	-1.101105	0.14814815	0.48051295	1	4653	tags=36%, list=26%, signal=48%
NIKOLSKY_BREAST_CANCER_12Q13_Q21_AMPLICON	NIKOLSKY_BREAST_CANCER_12Q13_Q21_AMPLICON		38	-0.31563318	-1.1008409	0.27659574	0.48071304	1	1893	tags=21%, list=10%, signal=23%
TAKEDA_TARGETS_OF_NUP98_HOXA9_FUSION_8D_DN	TAKEDA_TARGETS_OF_NUP98_HOXA9_FUSION_8D_DN		118	-0.25196087	-1.1006846	0.18518518	0.48067266	1	1562	tags=19%, list=9%, signal=21%
INGRAM_SHH_TARGETS_DN	INGRAM_SHH_TARGETS_DN		50	-0.29333866	-1.1004168	0.25510204	0.4808985	1	2320	tags=28%, list=13%, signal=32%
ASTIER_INTEGRIN_SIGNALING	ASTIER_INTEGRIN_SIGNALING		51	-0.29119045	-1.0996529	0.24691358	0.48227468	1	1312	tags=14%, list=7%, signal=15%
DACOSTA_UV_RESPONSE_VIA_ERCC3_COMMON_DN	DACOSTA_UV_RESPONSE_VIA_ERCC3_COMMON_DN		474	-0.21998481	-1.0995221	0	0.48212174	1	3859	tags=30%, list=21%, signal=37%
BILANGES_RAPAMYCIN_SENSITIVE_VIA_TSC1_AND_TSC2	BILANGES_RAPAMYCIN_SENSITIVE_VIA_TSC1_AND_TSC2		70	-0.27499446	-1.0987649	0.24822696	0.48345795	1	5300	tags=43%, list=29%, signal=60%
NIKOLSKY_BREAST_CANCER_20Q12_Q13_AMPLICON	NIKOLSKY_BREAST_CANCER_20Q12_Q13_AMPLICON		105	-0.25946277	-1.0986212	0.25581396	0.48337862	1	740	tags=9%, list=4%, signal=9%
IVANOVA_HEMATOPOIESIS_MATURE_CELL	IVANOVA_HEMATOPOIESIS_MATURE_CELL		249	-0.22593626	-1.0982736	0.16666667	0.48377773	1	2516	tags=20%, list=14%, signal=23%
MULLIGHAN_MLL_SIGNATURE_1_UP	MULLIGHAN_MLL_SIGNATURE_1_UP		315	-0.22120407	-1.0978823	0.10526316	0.48432824	1	2550	tags=20%, list=14%, signal=23%
GAVIN_FOXP3_TARGETS_CLUSTER_P7	GAVIN_FOXP3_TARGETS_CLUSTER_P7		72	-0.2692902	-1.0977517	0.2761194	0.4841721	1	2197	tags=24%, list=12%, signal=27%
RICKMAN_TUMOR_DIFFERENTIATED_WELL_VS_POORLY_UP	RICKMAN_TUMOR_DIFFERENTIATED_WELL_VS_POORLY_UP		221	-0.22713801	-1.0975161	0.09677419	0.48435265	1	3377	tags=28%, list=19%, signal=34%
SESTO_RESPONSE_TO_UV_C8	SESTO_RESPONSE_TO_UV_C8		66	-0.28482568	-1.0970323	0.24793388	0.48506504	1	4167	tags=33%, list=23%, signal=43%
LEE_EARLY_T_LYMPHOCYTE_DN	LEE_EARLY_T_LYMPHOCYTE_DN		42	-0.30187044	-1.096602	0.25925925	0.4856524	1	3017	tags=43%, list=17%, signal=51%
SCHLINGEMANN_SKIN_CARCINOGENESIS_TPA_UP	SCHLINGEMANN_SKIN_CARCINOGENESIS_TPA_UP		26	-0.3363113	-1.0964761	0.28282827	0.48547095	1	2877	tags=42%, list=16%, signal=50%
REACTOME_ANTIGEN_PROCESSING_UBIQUITINATION_PROTEASOME_DEGRADATION	REACTOME_ANTIGEN_PROCESSING_UBIQUITINATION_PROTEASOME_DEGRADATION		187	-0.23479056	-1.0949814	0.22916667	0.48860782	1	4529	tags=37%, list=25%, signal=49%
WEIGEL_OXIDATIVE_STRESS_BY_HNE_AND_TBH	WEIGEL_OXIDATIVE_STRESS_BY_HNE_AND_TBH		53	-0.2870484	-1.0943711	0.24277456	0.48965308	1	2423	tags=25%, list=13%, signal=28%
REACTOME_INTERFERON_GAMMA_SIGNALING	REACTOME_INTERFERON_GAMMA_SIGNALING		47	-0.2962826	-1.0938865	0.2937853	0.49026686	1	2845	tags=32%, list=16%, signal=38%
CROMER_TUMORIGENESIS_DN	CROMER_TUMORIGENESIS_DN		26	-0.3370054	-1.0937457	0.2919708	0.49014333	1	1837	tags=23%, list=10%, signal=26%
REACTOME_MRNA_SPLICING_MINOR_PATHWAY	REACTOME_MRNA_SPLICING_MINOR_PATHWAY		42	-0.2983786	-1.0926238	0.31746033	0.4925539	1	4072	tags=31%, list=23%, signal=40%
PEART_HDAC_PROLIFERATION_CLUSTER_UP	PEART_HDAC_PROLIFERATION_CLUSTER_UP		57	-0.278206	-1.0920244	0.27272728	0.49350396	1	1887	tags=21%, list=10%, signal=23%
MIYAGAWA_TARGETS_OF_EWSR1_ETS_FUSIONS_UP	MIYAGAWA_TARGETS_OF_EWSR1_ETS_FUSIONS_UP		220	-0.22949623	-1.0916355	0.102564104	0.4939218	1	2427	tags=24%, list=13%, signal=27%
PID_AVB3_INTEGRIN_PATHWAY	PID_AVB3_INTEGRIN_PATHWAY		68	-0.27073926	-1.0913627	0.24539877	0.49414557	1	682	tags=12%, list=4%, signal=12%
REACTOME_GLYCOLYSIS	REACTOME_GLYCOLYSIS		23	-0.33956915	-1.0911677	0.3127413	0.4941983	1	4806	tags=70%, list=27%, signal=95%
PID_SYNDECAN_2_PATHWAY	PID_SYNDECAN_2_PATHWAY		29	-0.32393473	-1.088602	0.29707113	0.49972126	1	3845	tags=38%, list=21%, signal=48%
KEGG_RNA_DEGRADATION	KEGG_RNA_DEGRADATION		56	-0.278311	-1.0880288	0.28735632	0.50072414	1	4130	tags=36%, list=23%, signal=46%
WANG_TUMOR_INVASIVENESS_UP	WANG_TUMOR_INVASIVENESS_UP		346	-0.21056643	-1.0877723	0.125	0.5008643	1	4638	tags=38%, list=26%, signal=51%
TAKEDA_TARGETS_OF_NUP98_HOXA9_FUSION_16D_UP	TAKEDA_TARGETS_OF_NUP98_HOXA9_FUSION_16D_UP		108	-0.2469611	-1.0876501	0.25	0.50074977	1	1567	tags=18%, list=9%, signal=19%
VALK_AML_CLUSTER_12	VALK_AML_CLUSTER_12		22	-0.3347697	-1.0859605	0.30837005	0.50442076	1	4096	tags=41%, list=23%, signal=53%
KEGG_PURINE_METABOLISM	KEGG_PURINE_METABOLISM		134	-0.23520419	-1.0859153	0.28985506	0.50409055	1	2700	tags=23%, list=15%, signal=27%
REACTOME_GLUCONEOGENESIS	REACTOME_GLUCONEOGENESIS		26	-0.32737216	-1.0857679	0.3090909	0.5039823	1	1956	tags=19%, list=11%, signal=22%
FIGUEROA_AML_METHYLATION_CLUSTER_3_DN	FIGUEROA_AML_METHYLATION_CLUSTER_3_DN		30	-0.32404104	-1.0856804	0.31944445	0.5037528	1	836	tags=13%, list=5%, signal=14%
MANN_RESPONSE_TO_AMIFOSTINE_UP	MANN_RESPONSE_TO_AMIFOSTINE_UP		19	-0.36939794	-1.0855485	0.31349206	0.5036169	1	2626	tags=42%, list=15%, signal=49%
CREIGHTON_ENDOCRINE_THERAPY_RESISTANCE_2	CREIGHTON_ENDOCRINE_THERAPY_RESISTANCE_2		378	-0.21447666	-1.0852029	0.125	0.50403655	1	2804	tags=27%, list=16%, signal=31%
BEGUM_TARGETS_OF_PAX3_FOXO1_FUSION_UP	BEGUM_TARGETS_OF_PAX3_FOXO1_FUSION_UP		52	-0.2788565	-1.0841366	0.30508474	0.5060063	1	1339	tags=21%, list=7%, signal=23%
ZWANG_EGF_PERSISTENTLY_DN	ZWANG_EGF_PERSISTENTLY_DN		47	-0.29227212	-1.0840833	0.29651162	0.5057082	1	3292	tags=40%, list=18%, signal=49%
IVANOVA_HEMATOPOIESIS_LATE_PROGENITOR	IVANOVA_HEMATOPOIESIS_LATE_PROGENITOR		450	-0.2147039	-1.0838603	0	0.50580645	1	2379	tags=18%, list=13%, signal=21%
SCHRAETS_MLL_TARGETS_DN	SCHRAETS_MLL_TARGETS_DN		25	-0.33047453	-1.0834365	0.30677292	0.5063404	1	3228	tags=40%, list=18%, signal=49%
REACTOME_SIGNAL_TRANSDUCTION_BY_L1	REACTOME_SIGNAL_TRANSDUCTION_BY_L1		33	-0.31967533	-1.0832479	0.3167421	0.5063797	1	3951	tags=33%, list=22%, signal=43%
VALK_AML_WITH_CEBPA	VALK_AML_WITH_CEBPA		25	-0.33974943	-1.0831566	0.3448276	0.50617665	1	1236	tags=12%, list=7%, signal=13%
JOSEPH_RESPONSE_TO_SODIUM_BUTYRATE_DN	JOSEPH_RESPONSE_TO_SODIUM_BUTYRATE_DN		53	-0.27983412	-1.0824834	0.31318682	0.5074251	1	2060	tags=28%, list=11%, signal=32%
REACTOME_ANTIGEN_PRESENTATION_FOLDING_ASSEMBLY_AND_PEPTIDE_LOADING_OF_CLASS_I_MHC	REACTOME_ANTIGEN_PRESENTATION_FOLDING_ASSEMBLY_AND_PEPTIDE_LOADING_OF_CLASS_I_MHC		20	-0.35569164	-1.082067	0.32283464	0.50797355	1	4096	tags=40%, list=23%, signal=52%
RASHI_RESPONSE_TO_IONIZING_RADIATION_6	RASHI_RESPONSE_TO_IONIZING_RADIATION_6		60	-0.27945998	-1.0820087	0.28402367	0.5076832	1	2253	tags=25%, list=12%, signal=28%
PID_HES_HEY_PATHWAY	PID_HES_HEY_PATHWAY		41	-0.2916491	-1.0813755	0.285	0.50885093	1	2259	tags=20%, list=13%, signal=22%
REACTOME_MRNA_PROCESSING	REACTOME_MRNA_PROCESSING		152	-0.23976181	-1.0813316	0.24657534	0.5085258	1	4242	tags=34%, list=24%, signal=44%
MENSSEN_MYC_TARGETS	MENSSEN_MYC_TARGETS		49	-0.28764725	-1.0811881	0.31073445	0.5084335	1	4103	tags=35%, list=23%, signal=45%
VISALA_AGING_LYMPHOCYTE_DN	VISALA_AGING_LYMPHOCYTE_DN		19	-0.34731764	-1.0811257	0.3256705	0.5081338	1	2910	tags=26%, list=16%, signal=31%
RIZKI_TUMOR_INVASIVENESS_2D_DN	RIZKI_TUMOR_INVASIVENESS_2D_DN		51	-0.28248715	-1.080966	0.2882353	0.5081306	1	3095	tags=31%, list=17%, signal=38%
URS_ADIPOCYTE_DIFFERENTIATION_DN	URS_ADIPOCYTE_DIFFERENTIATION_DN		27	-0.3274437	-1.0808223	0.3079848	0.50805044	1	886	tags=15%, list=5%, signal=16%
CHIARADONNA_NEOPLASTIC_TRANSFORMATION_KRAS_CDC25_UP	CHIARADONNA_NEOPLASTIC_TRANSFORMATION_KRAS_CDC25_UP		51	-0.28649238	-1.0782334	0.296875	0.51397556	1	2689	tags=29%, list=15%, signal=34%
LUI_THYROID_CANCER_CLUSTER_1	LUI_THYROID_CANCER_CLUSTER_1		50	-0.28598768	-1.0780661	0.3245033	0.51388633	1	2926	tags=32%, list=16%, signal=38%
YANG_MUC2_TARGETS_DUODENUM_3MO_DN	YANG_MUC2_TARGETS_DUODENUM_3MO_DN		16	-0.37883508	-1.0778636	0.35687733	0.51394284	1	1245	tags=19%, list=7%, signal=20%
QI_HYPOXIA	QI_HYPOXIA		133	-0.24130505	-1.0769727	0.2361111	0.51574934	1	3488	tags=35%, list=19%, signal=43%
LI_CISPLATIN_RESISTANCE_UP	LI_CISPLATIN_RESISTANCE_UP		24	-0.33431122	-1.0767543	0.29333332	0.5158406	1	200	tags=13%, list=1%, signal=13%
KEGG_FC_GAMMA_R_MEDIATED_PHAGOCYTOSIS	KEGG_FC_GAMMA_R_MEDIATED_PHAGOCYTOSIS		77	-0.25864175	-1.0766525	0.2847222	0.5156784	1	2902	tags=21%, list=16%, signal=25%
CEBALLOS_TARGETS_OF_TP53_AND_MYC_DN	CEBALLOS_TARGETS_OF_TP53_AND_MYC_DN		30	-0.3208455	-1.0753366	0.32286996	0.5185288	1	1582	tags=23%, list=9%, signal=26%
VANHARANTA_UTERINE_FIBROID_UP	VANHARANTA_UTERINE_FIBROID_UP		40	-0.28865406	-1.075177	0.31343284	0.51846755	1	1437	tags=20%, list=8%, signal=22%
REACTOME_TRANSPORT_OF_MATURE_MRNA_DERIVED_FROM_AN_INTRONLESS_TRANSCRIPT	REACTOME_TRANSPORT_OF_MATURE_MRNA_DERIVED_FROM_AN_INTRONLESS_TRANSCRIPT		32	-0.3094402	-1.0747571	0.32857144	0.5191294	1	3779	tags=41%, list=21%, signal=51%
SHAFFER_IRF4_TARGETS_IN_MYELOMA_VS_MATURE_B_LYMPHOCYTE	SHAFFER_IRF4_TARGETS_IN_MYELOMA_VS_MATURE_B_LYMPHOCYTE		94	-0.25163513	-1.0744857	0.2524272	0.5193433	1	3480	tags=30%, list=19%, signal=37%
ZHANG_ANTIVIRAL_RESPONSE_TO_RIBAVIRIN_UP	ZHANG_ANTIVIRAL_RESPONSE_TO_RIBAVIRIN_UP		25	-0.33166417	-1.0740441	0.32365146	0.51990175	1	3003	tags=44%, list=17%, signal=53%
MULLIGHAN_NPM1_SIGNATURE_3_UP	MULLIGHAN_NPM1_SIGNATURE_3_UP		275	-0.22342825	-1.0722469	0.09090909	0.52383673	1	2870	tags=23%, list=16%, signal=27%
LEE_LIVER_CANCER_E2F1_UP	LEE_LIVER_CANCER_E2F1_UP		48	-0.28588986	-1.0711946	0.31111112	0.52613515	1	921	tags=17%, list=5%, signal=18%
SEKI_INFLAMMATORY_RESPONSE_LPS_UP	SEKI_INFLAMMATORY_RESPONSE_LPS_UP		60	-0.2667593	-1.0707014	0.34463277	0.5270206	1	3084	tags=37%, list=17%, signal=44%
WOTTON_RUNX_TARGETS_DN	WOTTON_RUNX_TARGETS_DN		24	-0.34496018	-1.0704006	0.34728032	0.5273482	1	995	tags=25%, list=6%, signal=26%
WONG_IFNA2_RESISTANCE_DN	WONG_IFNA2_RESISTANCE_DN		30	-0.31704804	-1.0700793	0.3119266	0.5277466	1	1590	tags=13%, list=9%, signal=15%
ABDELMOHSEN_ELAVL4_TARGETS	ABDELMOHSEN_ELAVL4_TARGETS		16	-0.37239203	-1.0696472	0.38549617	0.52835053	1	5760	tags=63%, list=32%, signal=92%
WESTON_VEGFA_TARGETS	WESTON_VEGFA_TARGETS		88	-0.25777254	-1.0683361	0.26785713	0.5312546	1	893	tags=14%, list=5%, signal=14%
GEISS_RESPONSE_TO_DSRNA_DN	GEISS_RESPONSE_TO_DSRNA_DN		16	-0.36460137	-1.0682374	0.34680134	0.5310517	1	388	tags=13%, list=2%, signal=13%
TONKS_TARGETS_OF_RUNX1_RUNX1T1_FUSION_GRANULOCYTE_UP	TONKS_TARGETS_OF_RUNX1_RUNX1T1_FUSION_GRANULOCYTE_UP		48	-0.28646418	-1.0678633	0.33142856	0.5314468	1	2870	tags=29%, list=16%, signal=35%
BENPORATH_OCT4_TARGETS	BENPORATH_OCT4_TARGETS		258	-0.2285805	-1.0675251	0.34615386	0.53187335	1	2348	tags=19%, list=13%, signal=21%
BROCKE_APOPTOSIS_REVERSED_BY_IL6	BROCKE_APOPTOSIS_REVERSED_BY_IL6		131	-0.24363708	-1.0671716	0.27160493	0.53229284	1	2423	tags=24%, list=13%, signal=27%
PARK_TRETINOIN_RESPONSE_AND_PML_RARA_FUSION	PARK_TRETINOIN_RESPONSE_AND_PML_RARA_FUSION		23	-0.34083417	-1.0668631	0.37109375	0.53258884	1	1552	tags=26%, list=9%, signal=29%
REACTOME_MHC_CLASS_II_ANTIGEN_PRESENTATION	REACTOME_MHC_CLASS_II_ANTIGEN_PRESENTATION		79	-0.26138926	-1.0662885	0.33070865	0.5336286	1	3208	tags=25%, list=18%, signal=31%
BIOCARTA_MCALPAIN_PATHWAY	BIOCARTA_MCALPAIN_PATHWAY		22	-0.33935106	-1.0659803	0.34710744	0.533931	1	3845	tags=41%, list=21%, signal=52%
FULCHER_INFLAMMATORY_RESPONSE_LECTIN_VS_LPS_DN	FULCHER_INFLAMMATORY_RESPONSE_LECTIN_VS_LPS_DN		367	-0.21915022	-1.0659659	0.18181819	0.53351194	1	2359	tags=19%, list=13%, signal=22%
WHITFIELD_CELL_CYCLE_G1_S	WHITFIELD_CELL_CYCLE_G1_S		134	-0.24036533	-1.0658412	0.27941176	0.53340226	1	3520	tags=34%, list=20%, signal=42%
MARSON_FOXP3_TARGETS_UP	MARSON_FOXP3_TARGETS_UP		58	-0.27734697	-1.0657455	0.3090909	0.5331989	1	3040	tags=28%, list=17%, signal=33%
PEDERSEN_METASTASIS_BY_ERBB2_ISOFORM_4	PEDERSEN_METASTASIS_BY_ERBB2_ISOFORM_4		83	-0.26077068	-1.0656116	0.2857143	0.5331423	1	2200	tags=27%, list=12%, signal=30%
BLALOCK_ALZHEIMERS_DISEASE_INCIPIENT_UP	BLALOCK_ALZHEIMERS_DISEASE_INCIPIENT_UP		349	-0.21270068	-1.0655882	0.1875	0.53274214	1	3715	tags=30%, list=21%, signal=38%
CARD_MIR302A_TARGETS	CARD_MIR302A_TARGETS		72	-0.26068577	-1.0655416	0.28030303	0.532385	1	3724	tags=35%, list=21%, signal=44%
REACTOME_TRANSPORT_OF_VITAMINS_NUCLEOSIDES_AND_RELATED_MOLECULES	REACTOME_TRANSPORT_OF_VITAMINS_NUCLEOSIDES_AND_RELATED_MOLECULES		22	-0.33835208	-1.0647398	0.3423077	0.53389925	1	1532	tags=18%, list=8%, signal=20%
PID_P53_DOWNSTREAM_PATHWAY	PID_P53_DOWNSTREAM_PATHWAY		121	-0.23976311	-1.0644703	0.21212122	0.53414094	1	3503	tags=32%, list=19%, signal=40%
REACTOME_A_TETRASACCHARIDE_LINKER_SEQUENCE_IS_REQUIRED_FOR_GAG_SYNTHESIS	REACTOME_A_TETRASACCHARIDE_LINKER_SEQUENCE_IS_REQUIRED_FOR_GAG_SYNTHESIS		24	-0.3295688	-1.0639127	0.34453782	0.5351117	1	2228	tags=33%, list=12%, signal=38%
MELLMAN_TUT1_TARGETS_DN	MELLMAN_TUT1_TARGETS_DN		47	-0.2782947	-1.0639011	0.352657	0.5346955	1	1813	tags=23%, list=10%, signal=26%
GREGORY_SYNTHETIC_LETHAL_WITH_IMATINIB	GREGORY_SYNTHETIC_LETHAL_WITH_IMATINIB		125	-0.23444155	-1.0638684	0.29577464	0.53431463	1	2131	tags=19%, list=12%, signal=22%
KEGG_REGULATION_OF_ACTIN_CYTOSKELETON	KEGG_REGULATION_OF_ACTIN_CYTOSKELETON		180	-0.22628826	-1.0638146	0.2	0.53400457	1	3012	tags=24%, list=17%, signal=29%
FLOTHO_PEDIATRIC_ALL_THERAPY_RESPONSE_UP	FLOTHO_PEDIATRIC_ALL_THERAPY_RESPONSE_UP		48	-0.279957	-1.0637686	0.31491712	0.53368133	1	1828	tags=13%, list=10%, signal=14%
PID_TCR_PATHWAY	PID_TCR_PATHWAY		48	-0.27778512	-1.062949	0.34042552	0.5351524	1	799	tags=8%, list=4%, signal=9%
PID_ALPHA_SYNUCLEIN_PATHWAY	PID_ALPHA_SYNUCLEIN_PATHWAY		27	-0.32210195	-1.0623189	0.35	0.53627574	1	133	tags=7%, list=1%, signal=7%
PID_FAS_PATHWAY	PID_FAS_PATHWAY		36	-0.29653293	-1.0596714	0.3364929	0.54270124	1	3845	tags=42%, list=21%, signal=53%
YAO_TEMPORAL_RESPONSE_TO_PROGESTERONE_CLUSTER_13	YAO_TEMPORAL_RESPONSE_TO_PROGESTERONE_CLUSTER_13		167	-0.2296768	-1.0592763	0.27118644	0.5432256	1	3722	tags=28%, list=21%, signal=34%
BIOCARTA_EDG1_PATHWAY	BIOCARTA_EDG1_PATHWAY		24	-0.33043084	-1.0590295	0.31496063	0.5433486	1	2924	tags=29%, list=16%, signal=35%
KEGG_JAK_STAT_SIGNALING_PATHWAY	KEGG_JAK_STAT_SIGNALING_PATHWAY		90	-0.2502418	-1.0589377	0.32142857	0.5431204	1	2509	tags=26%, list=14%, signal=30%
SAGIV_CD24_TARGETS_UP	SAGIV_CD24_TARGETS_UP		20	-0.3531969	-1.0588564	0.37916666	0.54284674	1	3097	tags=40%, list=17%, signal=48%
SHIN_B_CELL_LYMPHOMA_CLUSTER_8	SHIN_B_CELL_LYMPHOMA_CLUSTER_8		28	-0.3088634	-1.0583026	0.3181818	0.5436737	1	2902	tags=36%, list=16%, signal=42%
BOYAULT_LIVER_CANCER_SUBCLASS_G1_DN	BOYAULT_LIVER_CANCER_SUBCLASS_G1_DN		38	-0.2892236	-1.0580319	0.31219512	0.5439247	1	3029	tags=34%, list=17%, signal=41%
SCHLOSSER_MYC_TARGETS_AND_SERUM_RESPONSE_UP	SCHLOSSER_MYC_TARGETS_AND_SERUM_RESPONSE_UP		46	-0.28468132	-1.0576057	0.4	0.54450846	1	4231	tags=39%, list=23%, signal=51%
REACTOME_GLYCOSAMINOGLYCAN_METABOLISM	REACTOME_GLYCOSAMINOGLYCAN_METABOLISM		88	-0.2506587	-1.0569971	0.29245284	0.5456974	1	2245	tags=23%, list=12%, signal=26%
TOMLINS_METASTASIS_DN	TOMLINS_METASTASIS_DN		16	-0.36789873	-1.0561349	0.37065637	0.5473496	1	4424	tags=63%, list=25%, signal=83%
BASSO_HAIRY_CELL_LEUKEMIA_DN	BASSO_HAIRY_CELL_LEUKEMIA_DN		70	-0.26337335	-1.055317	0.3548387	0.54893655	1	3072	tags=31%, list=17%, signal=38%
PRAMOONJAGO_SOX4_TARGETS_UP	PRAMOONJAGO_SOX4_TARGETS_UP		52	-0.2795406	-1.0552676	0.3537415	0.5485857	1	3458	tags=38%, list=19%, signal=47%
BIOCARTA_BCELLSURVIVAL_PATHWAY	BIOCARTA_BCELLSURVIVAL_PATHWAY		15	-0.38367233	-1.0536112	0.3923611	0.5523213	1	2294	tags=33%, list=13%, signal=38%
RASHI_RESPONSE_TO_IONIZING_RADIATION_5	RASHI_RESPONSE_TO_IONIZING_RADIATION_5		125	-0.24191037	-1.052746	0.32467532	0.5540353	1	3384	tags=28%, list=19%, signal=34%
ROSS_AML_WITH_PML_RARA_FUSION	ROSS_AML_WITH_PML_RARA_FUSION		63	-0.26430362	-1.0525305	0.3402778	0.55411834	1	1828	tags=19%, list=10%, signal=21%
SCHAEFFER_PROSTATE_DEVELOPMENT_6HR_DN	SCHAEFFER_PROSTATE_DEVELOPMENT_6HR_DN		474	-0.20929386	-1.0523522	0.25	0.55412525	1	3389	tags=23%, list=19%, signal=28%
BHAT_ESR1_TARGETS_NOT_VIA_AKT1_UP	BHAT_ESR1_TARGETS_NOT_VIA_AKT1_UP		174	-0.22524458	-1.0521805	0.3207547	0.5541013	1	1448	tags=13%, list=8%, signal=14%
HOFMANN_CELL_LYMPHOMA_DN	HOFMANN_CELL_LYMPHOMA_DN		34	-0.30079317	-1.0516216	0.36787564	0.55502504	1	2382	tags=24%, list=13%, signal=27%
REACTOME_PYRUVATE_METABOLISM_AND_CITRIC_ACID_TCA_CYCLE	REACTOME_PYRUVATE_METABOLISM_AND_CITRIC_ACID_TCA_CYCLE		39	-0.29962957	-1.0516123	0.3222749	0.5545921	1	700	tags=8%, list=4%, signal=8%
KEGG_PATHOGENIC_ESCHERICHIA_COLI_INFECTION	KEGG_PATHOGENIC_ESCHERICHIA_COLI_INFECTION		46	-0.29038087	-1.050943	0.34444445	0.55587196	1	4595	tags=48%, list=25%, signal=64%
BROWNE_HCMV_INFECTION_6HR_UP	BROWNE_HCMV_INFECTION_6HR_UP		49	-0.28451154	-1.0504034	0.32317072	0.5568332	1	3137	tags=29%, list=17%, signal=34%
KEGG_FOCAL_ADHESION	KEGG_FOCAL_ADHESION		179	-0.2258553	-1.050247	0.26984128	0.5567943	1	3159	tags=26%, list=18%, signal=32%
REACTOME_HIV_LIFE_CYCLE	REACTOME_HIV_LIFE_CYCLE		108	-0.24013086	-1.0502267	0.29	0.5563881	1	3654	tags=23%, list=20%, signal=29%
PECE_MAMMARY_STEM_CELL_DN	PECE_MAMMARY_STEM_CELL_DN		132	-0.23690721	-1.0493225	0.29411766	0.55845666	1	3313	tags=26%, list=18%, signal=31%
REACTOME_G_ALPHA_Z_SIGNALLING_EVENTS	REACTOME_G_ALPHA_Z_SIGNALLING_EVENTS		37	-0.29509655	-1.0492749	0.3681592	0.55811447	1	3165	tags=30%, list=18%, signal=36%
ZHU_SKIL_TARGETS_UP	ZHU_SKIL_TARGETS_UP		19	-0.34951836	-1.0487441	0.3731884	0.55906796	1	3022	tags=32%, list=17%, signal=38%
AKL_HTLV1_INFECTION_DN	AKL_HTLV1_INFECTION_DN		53	-0.27502832	-1.0484465	0.34415585	0.5594122	1	2821	tags=25%, list=16%, signal=29%
RUIZ_TNC_TARGETS_UP	RUIZ_TNC_TARGETS_UP		143	-0.23160708	-1.0483086	0.30666667	0.55932426	1	2373	tags=20%, list=13%, signal=23%
JIANG_HYPOXIA_VIA_VHL	JIANG_HYPOXIA_VIA_VHL		34	-0.29799902	-1.046974	0.3773585	0.56221145	1	3369	tags=35%, list=19%, signal=43%
RORIE_TARGETS_OF_EWSR1_FLI1_FUSION_DN	RORIE_TARGETS_OF_EWSR1_FLI1_FUSION_DN		28	-0.31653705	-1.0468154	0.3617021	0.5621385	1	1564	tags=25%, list=9%, signal=27%
KEGG_PRIMARY_IMMUNODEFICIENCY	KEGG_PRIMARY_IMMUNODEFICIENCY		18	-0.3560792	-1.0467215	0.36923078	0.5618974	1	2021	tags=22%, list=11%, signal=25%
PID_CD8_TCR_PATHWAY	PID_CD8_TCR_PATHWAY		38	-0.29957342	-1.0458882	0.35436893	0.5637744	1	799	tags=8%, list=4%, signal=8%
REACTOME_METABOLISM_OF_CARBOHYDRATES	REACTOME_METABOLISM_OF_CARBOHYDRATES		193	-0.21832421	-1.0457329	0.33333334	0.56366605	1	2929	tags=24%, list=16%, signal=28%
HOLLMANN_APOPTOSIS_VIA_CD40_DN	HOLLMANN_APOPTOSIS_VIA_CD40_DN		227	-0.22277187	-1.0450684	0.23529412	0.5647826	1	3212	tags=25%, list=18%, signal=30%
ELVIDGE_HYPOXIA_DN	ELVIDGE_HYPOXIA_DN		136	-0.23673742	-1.0439879	0.35955057	0.5672267	1	3158	tags=22%, list=18%, signal=27%
ULE_SPLICING_VIA_NOVA2	ULE_SPLICING_VIA_NOVA2		41	-0.28673545	-1.0425087	0.43575418	0.5706783	1	3473	tags=41%, list=19%, signal=51%
OUYANG_PROSTATE_CANCER_MARKERS	OUYANG_PROSTATE_CANCER_MARKERS		16	-0.3572717	-1.0423378	0.3731884	0.5707318	1	1579	tags=31%, list=9%, signal=34%
REACTOME_ERK_MAPK_TARGETS	REACTOME_ERK_MAPK_TARGETS		21	-0.33600077	-1.0423247	0.39917696	0.5703063	1	4806	tags=52%, list=27%, signal=71%
OKAMOTO_LIVER_CANCER_MULTICENTRIC_OCCURRENCE_UP	OKAMOTO_LIVER_CANCER_MULTICENTRIC_OCCURRENCE_UP		21	-0.33281144	-1.0412852	0.4032258	0.57263124	1	3627	tags=48%, list=20%, signal=60%
GAJATE_RESPONSE_TO_TRABECTEDIN_DN	GAJATE_RESPONSE_TO_TRABECTEDIN_DN		19	-0.34129298	-1.0408629	0.3857143	0.573254	1	3454	tags=26%, list=19%, signal=33%
KEGG_GLIOMA	KEGG_GLIOMA		58	-0.2686257	-1.0403063	0.35119048	0.5742236	1	4103	tags=40%, list=23%, signal=51%
HEIDENBLAD_AMPLICON_8Q24_UP	HEIDENBLAD_AMPLICON_8Q24_UP		34	-0.3015661	-1.0394692	0.369863	0.57601786	1	3125	tags=29%, list=17%, signal=36%
REACTOME_KERATAN_SULFATE_KERATIN_METABOLISM	REACTOME_KERATAN_SULFATE_KERATIN_METABOLISM		23	-0.32899964	-1.0392251	0.408	0.57626206	1	495	tags=13%, list=3%, signal=13%
WARTERS_IR_RESPONSE_5GY	WARTERS_IR_RESPONSE_5GY		41	-0.29217446	-1.0381427	0.365	0.57868916	1	2445	tags=32%, list=14%, signal=37%
DORN_ADENOVIRUS_INFECTION_24HR_DN	DORN_ADENOVIRUS_INFECTION_24HR_DN		41	-0.28846037	-1.0376022	0.37438422	0.5796882	1	3271	tags=39%, list=18%, signal=48%
SU_PANCREAS	SU_PANCREAS		28	-0.3213401	-1.0375978	0.38157895	0.57922477	1	1946	tags=25%, list=11%, signal=28%
JACKSON_DNMT1_TARGETS_DN	JACKSON_DNMT1_TARGETS_DN		24	-0.32461068	-1.0375266	0.3537906	0.57893616	1	3059	tags=42%, list=17%, signal=50%
YAGI_AML_FAB_MARKERS	YAGI_AML_FAB_MARKERS		160	-0.23172918	-1.0369852	0.36842105	0.5798742	1	3441	tags=32%, list=19%, signal=39%
MATSUDA_NATURAL_KILLER_DIFFERENTIATION	MATSUDA_NATURAL_KILLER_DIFFERENTIATION		394	-0.21011756	-1.0368203	0.14285715	0.5798789	1	3000	tags=25%, list=17%, signal=29%
DORN_ADENOVIRUS_INFECTION_32HR_DN	DORN_ADENOVIRUS_INFECTION_32HR_DN		36	-0.28195673	-1.0358368	0.4054054	0.58193773	1	2867	tags=36%, list=16%, signal=43%
YAGI_AML_WITH_11Q23_REARRANGED	YAGI_AML_WITH_11Q23_REARRANGED		301	-0.21765557	-1.0354415	0.26086956	0.5826569	1	2551	tags=20%, list=14%, signal=23%
REACTOME_G_ALPHA1213_SIGNALLING_EVENTS	REACTOME_G_ALPHA1213_SIGNALLING_EVENTS		66	-0.25709748	-1.0349898	0.36526945	0.5834766	1	2916	tags=26%, list=16%, signal=31%
KEGG_TOLL_LIKE_RECEPTOR_SIGNALING_PATHWAY	KEGG_TOLL_LIKE_RECEPTOR_SIGNALING_PATHWAY		77	-0.24812286	-1.0345999	0.36363637	0.5840413	1	3670	tags=34%, list=20%, signal=42%
PID_INTEGRIN1_PATHWAY	PID_INTEGRIN1_PATHWAY		59	-0.26332733	-1.0344836	0.40236688	0.5838762	1	2302	tags=31%, list=13%, signal=35%
ICHIBA_GRAFT_VERSUS_HOST_DISEASE_35D_UP	ICHIBA_GRAFT_VERSUS_HOST_DISEASE_35D_UP		81	-0.2534789	-1.0344623	0.41666666	0.58346075	1	2118	tags=19%, list=12%, signal=21%
BILANGES_SERUM_SENSITIVE_GENES	BILANGES_SERUM_SENSITIVE_GENES		74	-0.25425732	-1.0343162	0.3986014	0.5833642	1	2797	tags=22%, list=16%, signal=25%
LOPEZ_MBD_TARGETS_IMPRINTED_AND_X_LINKED	LOPEZ_MBD_TARGETS_IMPRINTED_AND_X_LINKED		16	-0.34937558	-1.034316	0.38267148	0.58289677	1	857	tags=19%, list=5%, signal=20%
MOREAUX_B_LYMPHOCYTE_MATURATION_BY_TACI_DN	MOREAUX_B_LYMPHOCYTE_MATURATION_BY_TACI_DN		70	-0.2538644	-1.0335985	0.36363637	0.5843264	1	4142	tags=31%, list=23%, signal=41%
PID_ARF6_PATHWAY	PID_ARF6_PATHWAY		33	-0.29505122	-1.0325326	0.38723403	0.5867901	1	1327	tags=15%, list=7%, signal=16%
TIAN_BHLHA15_TARGETS	TIAN_BHLHA15_TARGETS		15	-0.36058044	-1.0320644	0.40273038	0.58761775	1	2578	tags=40%, list=14%, signal=47%
COULOUARN_TEMPORAL_TGFB1_SIGNATURE_UP	COULOUARN_TEMPORAL_TGFB1_SIGNATURE_UP		97	-0.24052203	-1.0317947	0.26956522	0.58787745	1	3396	tags=32%, list=19%, signal=39%
WOO_LIVER_CANCER_RECURRENCE_UP	WOO_LIVER_CANCER_RECURRENCE_UP		92	-0.24086863	-1.0316277	0.3529412	0.5878361	1	1672	tags=21%, list=9%, signal=23%
REACTOME_NUCLEAR_EVENTS_KINASE_AND_TRANSCRIPTION_FACTOR_ACTIVATION	REACTOME_NUCLEAR_EVENTS_KINASE_AND_TRANSCRIPTION_FACTOR_ACTIVATION		24	-0.32713148	-1.0311327	0.3787234	0.5886593	1	4806	tags=54%, list=27%, signal=74%
ONDER_CDH1_TARGETS_3_DN	ONDER_CDH1_TARGETS_3_DN		26	-0.30365637	-1.0294546	0.37751004	0.5927719	1	1744	tags=31%, list=10%, signal=34%
NATSUME_RESPONSE_TO_INTERFERON_BETA_UP	NATSUME_RESPONSE_TO_INTERFERON_BETA_UP		63	-0.26012346	-1.0287424	0.3986014	0.5942041	1	2265	tags=25%, list=13%, signal=29%
CAMPS_COLON_CANCER_COPY_NUMBER_DN	CAMPS_COLON_CANCER_COPY_NUMBER_DN		36	-0.29447654	-1.0285188	0.38190955	0.5943469	1	1163	tags=19%, list=6%, signal=21%
REACTOME_SIGNALING_BY_TGF_BETA_RECEPTOR_COMPLEX	REACTOME_SIGNALING_BY_TGF_BETA_RECEPTOR_COMPLEX		60	-0.26768416	-1.0281458	0.39751554	0.5948449	1	4748	tags=47%, list=26%, signal=63%
WAMUNYOKOLI_OVARIAN_CANCER_GRADES_1_2_UP	WAMUNYOKOLI_OVARIAN_CANCER_GRADES_1_2_UP		118	-0.22445385	-1.026976	0.42222223	0.5974362	1	2960	tags=26%, list=16%, signal=31%
KEGG_PRION_DISEASES	KEGG_PRION_DISEASES		27	-0.31434166	-1.026975	0.3898305	0.59696716	1	498	tags=11%, list=3%, signal=11%
MORI_MATURE_B_LYMPHOCYTE_UP	MORI_MATURE_B_LYMPHOCYTE_UP		73	-0.24626346	-1.0265859	0.4236111	0.59759307	1	2351	tags=23%, list=13%, signal=27%
VERRECCHIA_RESPONSE_TO_TGFB1_C5	VERRECCHIA_RESPONSE_TO_TGFB1_C5		19	-0.33792558	-1.0265146	0.4105691	0.597329	1	3374	tags=32%, list=19%, signal=39%
TAYLOR_METHYLATED_IN_ACUTE_LYMPHOBLASTIC_LEUKEMIA	TAYLOR_METHYLATED_IN_ACUTE_LYMPHOBLASTIC_LEUKEMIA		74	-0.24492231	-1.0264328	0.3245033	0.5970374	1	2735	tags=24%, list=15%, signal=29%
JAATINEN_HEMATOPOIETIC_STEM_CELL_UP	JAATINEN_HEMATOPOIETIC_STEM_CELL_UP		270	-0.21257235	-1.0261164	0.42105263	0.5974714	1	2805	tags=24%, list=16%, signal=29%
KEGG_DRUG_METABOLISM_OTHER_ENZYMES	KEGG_DRUG_METABOLISM_OTHER_ENZYMES		21	-0.33209598	-1.0259713	0.388	0.5973801	1	4291	tags=38%, list=24%, signal=50%
GAUSSMANN_MLL_AF4_FUSION_TARGETS_G_UP	GAUSSMANN_MLL_AF4_FUSION_TARGETS_G_UP		169	-0.2174667	-1.0258093	0.45454547	0.5973604	1	2782	tags=23%, list=15%, signal=27%
KIM_MYCL1_AMPLIFICATION_TARGETS_DN	KIM_MYCL1_AMPLIFICATION_TARGETS_DN		19	-0.33883336	-1.0257955	0.40562248	0.5969162	1	4286	tags=53%, list=24%, signal=69%
WEINMANN_ADAPTATION_TO_HYPOXIA_DN	WEINMANN_ADAPTATION_TO_HYPOXIA_DN		35	-0.29296482	-1.024035	0.39534885	0.6012409	1	1672	tags=26%, list=9%, signal=28%
SAKAI_TUMOR_INFILTRATING_MONOCYTES_DN	SAKAI_TUMOR_INFILTRATING_MONOCYTES_DN		75	-0.25563768	-1.0240307	0.33333334	0.6007747	1	3865	tags=29%, list=21%, signal=37%
LIU_VMYB_TARGETS_UP	LIU_VMYB_TARGETS_UP		115	-0.23521714	-1.0237935	0.36893204	0.6008957	1	2408	tags=23%, list=13%, signal=27%
HAHTOLA_MYCOSIS_FUNGOIDES_CD4_DN	HAHTOLA_MYCOSIS_FUNGOIDES_CD4_DN		109	-0.23586154	-1.0230492	0.3478261	0.60263336	1	3034	tags=24%, list=17%, signal=29%
HERNANDEZ_MITOTIC_ARREST_BY_DOCETAXEL_1_UP	HERNANDEZ_MITOTIC_ARREST_BY_DOCETAXEL_1_UP		27	-0.30588683	-1.0225797	0.38372093	0.6034966	1	1912	tags=30%, list=11%, signal=33%
PEPPER_CHRONIC_LYMPHOCYTIC_LEUKEMIA_UP	PEPPER_CHRONIC_LYMPHOCYTIC_LEUKEMIA_UP		22	-0.33885407	-1.0223053	0.42145595	0.6037892	1	1792	tags=23%, list=10%, signal=25%
PID_CXCR4_PATHWAY	PID_CXCR4_PATHWAY		87	-0.24737543	-1.0222279	0.31092438	0.6035315	1	1576	tags=14%, list=9%, signal=15%
YAGI_AML_WITH_INV_16_TRANSLOCATION	YAGI_AML_WITH_INV_16_TRANSLOCATION		354	-0.20459019	-1.0221784	0.33333334	0.60318494	1	2155	tags=15%, list=12%, signal=17%
GRESHOCK_CANCER_COPY_NUMBER_UP	GRESHOCK_CANCER_COPY_NUMBER_UP		283	-0.20546068	-1.0213506	0.3809524	0.6049261	1	2849	tags=23%, list=16%, signal=26%
SHETH_LIVER_CANCER_VS_TXNIP_LOSS_PAM2	SHETH_LIVER_CANCER_VS_TXNIP_LOSS_PAM2		132	-0.2360351	-1.021296	0.34615386	0.6045966	1	1879	tags=23%, list=10%, signal=25%
ROSS_LEUKEMIA_WITH_MLL_FUSIONS	ROSS_LEUKEMIA_WITH_MLL_FUSIONS		60	-0.25648734	-1.0196717	0.38607594	0.60867745	1	358	tags=8%, list=2%, signal=8%
MCBRYAN_PUBERTAL_BREAST_5_6WK_DN	MCBRYAN_PUBERTAL_BREAST_5_6WK_DN		126	-0.23260318	-1.0194829	0.35211268	0.6086498	1	3198	tags=26%, list=18%, signal=32%
WHITFIELD_CELL_CYCLE_M_G1	WHITFIELD_CELL_CYCLE_M_G1		132	-0.22991177	-1.0193126	0.41463414	0.6086868	1	3841	tags=33%, list=21%, signal=41%
ZHANG_BREAST_CANCER_PROGENITORS_DN	ZHANG_BREAST_CANCER_PROGENITORS_DN		121	-0.23521145	-1.0188903	0.45833334	0.6093891	1	2964	tags=21%, list=16%, signal=25%
DEURIG_T_CELL_PROLYMPHOCYTIC_LEUKEMIA_DN	DEURIG_T_CELL_PROLYMPHOCYTIC_LEUKEMIA_DN		245	-0.21485902	-1.0185524	0.5	0.60989505	1	3534	tags=27%, list=20%, signal=33%
ROSS_AML_OF_FAB_M7_TYPE	ROSS_AML_OF_FAB_M7_TYPE		61	-0.260945	-1.0173452	0.3877551	0.61267936	1	1795	tags=15%, list=10%, signal=16%
KEGG_AMINO_SUGAR_AND_NUCLEOTIDE_SUGAR_METABOLISM	KEGG_AMINO_SUGAR_AND_NUCLEOTIDE_SUGAR_METABOLISM		41	-0.27449164	-1.0171435	0.39181286	0.61274993	1	1803	tags=17%, list=10%, signal=19%
REACTOME_SMAD2_SMAD3_SMAD4_HETEROTRIMER_REGULATES_TRANSCRIPTION	REACTOME_SMAD2_SMAD3_SMAD4_HETEROTRIMER_REGULATES_TRANSCRIPTION		25	-0.3259461	-1.01653	0.41409692	0.6139047	1	4387	tags=52%, list=24%, signal=69%
BOQUEST_STEM_CELL_CULTURED_VS_FRESH_DN	BOQUEST_STEM_CELL_CULTURED_VS_FRESH_DN		17	-0.3422404	-1.0164173	0.42857143	0.6137159	1	1798	tags=41%, list=10%, signal=46%
MODY_HIPPOCAMPUS_NEONATAL	MODY_HIPPOCAMPUS_NEONATAL		31	-0.29341862	-1.0160097	0.41666666	0.61438745	1	4562	tags=45%, list=25%, signal=60%
HUANG_GATA2_TARGETS_DN	HUANG_GATA2_TARGETS_DN		65	-0.2547638	-1.015599	0.40853658	0.61507213	1	2929	tags=29%, list=16%, signal=35%
CASORELLI_ACUTE_PROMYELOCYTIC_LEUKEMIA_UP	CASORELLI_ACUTE_PROMYELOCYTIC_LEUKEMIA_UP		142	-0.21988195	-1.0154572	0.43373495	0.61497015	1	2576	tags=22%, list=14%, signal=25%
DACOSTA_ERCC3_ALLELE_XPCS_VS_TTD_UP	DACOSTA_ERCC3_ALLELE_XPCS_VS_TTD_UP		25	-0.31155252	-1.014512	0.39726028	0.616972	1	1273	tags=24%, list=7%, signal=26%
PID_ERBB1_DOWNSTREAM_PATHWAY	PID_ERBB1_DOWNSTREAM_PATHWAY		104	-0.22943336	-1.0139837	0.36734694	0.61783355	1	3017	tags=22%, list=17%, signal=26%
NIKOLSKY_BREAST_CANCER_8Q23_Q24_AMPLICON	NIKOLSKY_BREAST_CANCER_8Q23_Q24_AMPLICON		127	-0.23184271	-1.0139072	0.42222223	0.6175702	1	1655	tags=14%, list=9%, signal=15%
MATZUK_SPERMATOCYTE	MATZUK_SPERMATOCYTE		61	-0.26025325	-1.012826	0.43452382	0.61987233	1	2566	tags=34%, list=14%, signal=40%
IKEDA_MIR30_TARGETS_UP	IKEDA_MIR30_TARGETS_UP		113	-0.22931755	-1.0128068	0.3898305	0.61944	1	2122	tags=21%, list=12%, signal=24%
POMEROY_MEDULLOBLASTOMA_PROGNOSIS_DN	POMEROY_MEDULLOBLASTOMA_PROGNOSIS_DN		43	-0.27616486	-1.0121038	0.42051283	0.62094235	1	2855	tags=19%, list=16%, signal=22%
RIZ_ERYTHROID_DIFFERENTIATION_HEMGN	RIZ_ERYTHROID_DIFFERENTIATION_HEMGN		23	-0.316786	-1.011805	0.39591837	0.62128997	1	1861	tags=22%, list=10%, signal=24%
RAO_BOUND_BY_SALL4_ISOFORM_A	RAO_BOUND_BY_SALL4_ISOFORM_A		127	-0.23197593	-1.011789	0.4390244	0.62085974	1	980	tags=12%, list=5%, signal=12%
LU_EZH2_TARGETS_UP	LU_EZH2_TARGETS_UP		249	-0.20981868	-1.0105766	0.42105263	0.6237545	1	2372	tags=20%, list=13%, signal=23%
REACTOME_SIGNALING_BY_NOTCH1	REACTOME_SIGNALING_BY_NOTCH1		66	-0.25398928	-1.0103701	0.47826087	0.62386876	1	1325	tags=15%, list=7%, signal=16%
ZHENG_GLIOBLASTOMA_PLASTICITY_DN	ZHENG_GLIOBLASTOMA_PLASTICITY_DN		48	-0.27634427	-1.0093251	0.43414634	0.6262077	1	2266	tags=27%, list=13%, signal=31%
ELVIDGE_HIF1A_TARGETS_UP	ELVIDGE_HIF1A_TARGETS_UP		63	-0.25177914	-1.0092419	0.4676259	0.6259571	1	2509	tags=16%, list=14%, signal=18%
CROMER_METASTASIS_UP	CROMER_METASTASIS_UP		77	-0.24634197	-1.0090892	0.40601504	0.62593114	1	3442	tags=25%, list=19%, signal=30%
PENG_LEUCINE_DEPRIVATION_UP	PENG_LEUCINE_DEPRIVATION_UP		125	-0.22701082	-1.0090628	0.40229884	0.62555635	1	3003	tags=26%, list=17%, signal=31%
JISON_SICKLE_CELL_DISEASE_DN	JISON_SICKLE_CELL_DISEASE_DN		161	-0.21922705	-1.0083852	0.45901638	0.6269533	1	3838	tags=27%, list=21%, signal=34%
PID_A6B1_A6B4_INTEGRIN_PATHWAY	PID_A6B1_A6B4_INTEGRIN_PATHWAY		41	-0.2781083	-1.0077705	0.45771143	0.628168	1	3012	tags=24%, list=17%, signal=29%
SCHAEFFER_PROSTATE_DEVELOPMENT_6HR_UP	SCHAEFFER_PROSTATE_DEVELOPMENT_6HR_UP		142	-0.22774385	-1.0074352	0.42424244	0.6286693	1	2471	tags=20%, list=14%, signal=23%
HOSHIDA_LIVER_CANCER_SUBCLASS_S1	HOSHIDA_LIVER_CANCER_SUBCLASS_S1		200	-0.21280956	-1.0060242	0.4054054	0.6320007	1	3256	tags=31%, list=18%, signal=37%
MEISSNER_ES_ICP_WITH_H3K4ME3	MEISSNER_ES_ICP_WITH_H3K4ME3		30	-0.3023655	-1.0053223	0.4181818	0.63347286	1	2404	tags=20%, list=13%, signal=23%
BIOCARTA_EIF4_PATHWAY	BIOCARTA_EIF4_PATHWAY		24	-0.30694115	-1.0040973	0.44104803	0.63638914	1	4819	tags=50%, list=27%, signal=68%
RADMACHER_AML_PROGNOSIS	RADMACHER_AML_PROGNOSIS		63	-0.25297856	-1.003936	0.48427674	0.6363406	1	2910	tags=29%, list=16%, signal=34%
XU_CREBBP_TARGETS_DN	XU_CREBBP_TARGETS_DN		36	-0.278101	-1.0038445	0.4225352	0.63615954	1	2270	tags=25%, list=13%, signal=29%
PAL_PRMT5_TARGETS_DN	PAL_PRMT5_TARGETS_DN		21	-0.32140407	-1.003365	0.44537815	0.6370003	1	770	tags=14%, list=4%, signal=15%
SHEN_SMARCA2_TARGETS_UP	SHEN_SMARCA2_TARGETS_UP		417	-0.20783888	-1.0032768	0.33333334	0.63676465	1	4748	tags=35%, list=26%, signal=46%
KEGG_ADHERENS_JUNCTION	KEGG_ADHERENS_JUNCTION		70	-0.24524355	-1.0028718	0.43661973	0.6374507	1	2902	tags=26%, list=16%, signal=31%
KAYO_AGING_MUSCLE_DN	KAYO_AGING_MUSCLE_DN		112	-0.23096707	-1.002465	0.48314607	0.6380941	1	2112	tags=14%, list=12%, signal=16%
DORSEY_GAB2_TARGETS	DORSEY_GAB2_TARGETS		23	-0.3163155	-1.0009338	0.44656488	0.64167035	1	2870	tags=39%, list=16%, signal=46%
BURTON_ADIPOGENESIS_2	BURTON_ADIPOGENESIS_2		65	-0.2535708	-1.000757	0.45679012	0.64169246	1	3137	tags=34%, list=17%, signal=41%
AMIT_SERUM_RESPONSE_240_MCF10A	AMIT_SERUM_RESPONSE_240_MCF10A		52	-0.2602009	-1.0004328	0.42045453	0.64206254	1	588	tags=13%, list=3%, signal=14%
REACTOME_NFKB_AND_MAP_KINASES_ACTIVATION_MEDIATED_BY_TLR4_SIGNALING_REPERTOIRE	REACTOME_NFKB_AND_MAP_KINASES_ACTIVATION_MEDIATED_BY_TLR4_SIGNALING_REPERTOIRE		68	-0.25382516	-1.0000473	0.4520548	0.64261174	1	4026	tags=34%, list=22%, signal=43%
HOFMANN_MYELODYSPLASTIC_SYNDROM_LOW_RISK_UP	HOFMANN_MYELODYSPLASTIC_SYNDROM_LOW_RISK_UP		16	-0.35597655	-0.9993899	0.45090908	0.643892	1	1288	tags=19%, list=7%, signal=20%
NOUSHMEHR_GBM_SILENCED_BY_METHYLATION	NOUSHMEHR_GBM_SILENCED_BY_METHYLATION		39	-0.27826336	-0.99865043	0.45959595	0.6454642	1	2097	tags=26%, list=12%, signal=29%
ZHAN_MULTIPLE_MYELOMA_UP	ZHAN_MULTIPLE_MYELOMA_UP		60	-0.2544533	-0.9982096	0.42580646	0.646223	1	3968	tags=33%, list=22%, signal=43%
WELCSH_BRCA1_TARGETS_UP	WELCSH_BRCA1_TARGETS_UP		187	-0.21607833	-0.99782336	0.42553192	0.64681166	1	3668	tags=28%, list=20%, signal=35%
BOYAULT_LIVER_CANCER_SUBCLASS_G123_UP	BOYAULT_LIVER_CANCER_SUBCLASS_G123_UP		42	-0.27401057	-0.9978057	0.49468085	0.64637405	1	4670	tags=52%, list=26%, signal=71%
ENK_UV_RESPONSE_EPIDERMIS_DN	ENK_UV_RESPONSE_EPIDERMIS_DN		451	-0.18850729	-0.99712366	0.6666667	0.64782137	1	1924	tags=16%, list=11%, signal=17%
BIOCARTA_CCR5_PATHWAY	BIOCARTA_CCR5_PATHWAY		15	-0.34295192	-0.99584377	0.44280443	0.6508011	1	546	tags=13%, list=3%, signal=14%
CHEOK_RESPONSE_TO_MERCAPTOPURINE_AND_HD_MTX_DN	CHEOK_RESPONSE_TO_MERCAPTOPURINE_AND_HD_MTX_DN		20	-0.32546613	-0.99504477	0.45703125	0.6524594	1	3190	tags=30%, list=18%, signal=36%
REACTOME_RIG_I_MDA5_MEDIATED_INDUCTION_OF_IFN_ALPHA_BETA_PATHWAYS	REACTOME_RIG_I_MDA5_MEDIATED_INDUCTION_OF_IFN_ALPHA_BETA_PATHWAYS		56	-0.25162074	-0.99473095	0.44025156	0.6528429	1	3102	tags=27%, list=17%, signal=32%
BROWNE_HCMV_INFECTION_30MIN_DN	BROWNE_HCMV_INFECTION_30MIN_DN		110	-0.2270267	-0.99282634	0.48863637	0.6576826	1	1993	tags=17%, list=11%, signal=19%
WARTERS_RESPONSE_TO_IR_SKIN	WARTERS_RESPONSE_TO_IR_SKIN		70	-0.24722263	-0.9921139	0.46835443	0.6591257	1	2260	tags=27%, list=13%, signal=31%
DORN_ADENOVIRUS_INFECTION_12HR_UP	DORN_ADENOVIRUS_INFECTION_12HR_UP		25	-0.30842948	-0.99150735	0.47659576	0.6602358	1	2867	tags=44%, list=16%, signal=52%
ALCALA_APOPTOSIS	ALCALA_APOPTOSIS		76	-0.22997645	-0.9899485	0.4957265	0.6640161	1	3348	tags=25%, list=19%, signal=31%
REACTOME_3_UTR_MEDIATED_TRANSLATIONAL_REGULATION	REACTOME_3_UTR_MEDIATED_TRANSLATIONAL_REGULATION		103	-0.22743683	-0.9893398	0.46728972	0.6651615	1	10938	tags=95%, list=61%, signal=240%
PARK_HSC_VS_MULTIPOTENT_PROGENITORS_UP	PARK_HSC_VS_MULTIPOTENT_PROGENITORS_UP		17	-0.32830885	-0.98906046	0.46357617	0.6654315	1	3794	tags=29%, list=21%, signal=37%
REACTOME_MAPK_TARGETS_NUCLEAR_EVENTS_MEDIATED_BY_MAP_KINASES	REACTOME_MAPK_TARGETS_NUCLEAR_EVENTS_MEDIATED_BY_MAP_KINASES		30	-0.28795028	-0.9881766	0.45539907	0.6673294	1	4806	tags=50%, list=27%, signal=68%
DORN_ADENOVIRUS_INFECTION_12HR_DN	DORN_ADENOVIRUS_INFECTION_12HR_DN		31	-0.29164484	-0.98815924	0.47577092	0.6668797	1	2457	tags=26%, list=14%, signal=30%
YANG_BREAST_CANCER_ESR1_BULK_UP	YANG_BREAST_CANCER_ESR1_BULK_UP		25	-0.3097811	-0.98776793	0.47325101	0.6675109	1	2951	tags=40%, list=16%, signal=48%
RUTELLA_RESPONSE_TO_HGF_VS_CSF2RB_AND_IL4_DN	RUTELLA_RESPONSE_TO_HGF_VS_CSF2RB_AND_IL4_DN		217	-0.21010068	-0.98775625	0.5714286	0.66704774	1	3072	tags=27%, list=17%, signal=32%
KEGG_FRUCTOSE_AND_MANNOSE_METABOLISM	KEGG_FRUCTOSE_AND_MANNOSE_METABOLISM		31	-0.29133126	-0.9876254	0.46902654	0.6668651	1	2890	tags=32%, list=16%, signal=38%
NIELSEN_LIPOSARCOMA_DN	NIELSEN_LIPOSARCOMA_DN		18	-0.3324988	-0.9875125	0.44522968	0.6667232	1	1134	tags=28%, list=6%, signal=30%
PID_ECADHERIN_STABILIZATION_PATHWAY	PID_ECADHERIN_STABILIZATION_PATHWAY		39	-0.27330306	-0.9872699	0.46192893	0.66689944	1	2718	tags=26%, list=15%, signal=30%
LIU_SOX4_TARGETS_UP	LIU_SOX4_TARGETS_UP		120	-0.22298592	-0.9865051	0.5185185	0.66841453	1	2832	tags=21%, list=16%, signal=25%
REACTOME_APC_C_CDC20_MEDIATED_DEGRADATION_OF_CYCLIN_B	REACTOME_APC_C_CDC20_MEDIATED_DEGRADATION_OF_CYCLIN_B		19	-0.32899812	-0.9863379	0.44673538	0.6684034	1	3236	tags=26%, list=18%, signal=32%
OUILLETTE_CLL_13Q14_DELETION_UP	OUILLETTE_CLL_13Q14_DELETION_UP		67	-0.24612296	-0.98632747	0.45625	0.6679341	1	2227	tags=21%, list=12%, signal=24%
HOLLEMAN_PREDNISOLONE_RESISTANCE_ALL_UP	HOLLEMAN_PREDNISOLONE_RESISTANCE_ALL_UP		19	-0.3257188	-0.9855405	0.43983403	0.6696251	1	4091	tags=47%, list=23%, signal=61%
PID_ER_NONGENOMIC_PATHWAY	PID_ER_NONGENOMIC_PATHWAY		38	-0.26995796	-0.98521143	0.51627904	0.6701178	1	3856	tags=39%, list=21%, signal=50%
REACTOME_L1CAM_INTERACTIONS	REACTOME_L1CAM_INTERACTIONS		76	-0.2371163	-0.98479444	0.47945204	0.6708217	1	2327	tags=21%, list=13%, signal=24%
BERENJENO_ROCK_SIGNALING_NOT_VIA_RHOA_DN	BERENJENO_ROCK_SIGNALING_NOT_VIA_RHOA_DN		45	-0.2681546	-0.9847679	0.4832536	0.670373	1	2762	tags=24%, list=15%, signal=29%
BOYLAN_MULTIPLE_MYELOMA_C_D_DN	BOYLAN_MULTIPLE_MYELOMA_C_D_DN		151	-0.2205264	-0.9845694	0.5753425	0.6703951	1	1917	tags=16%, list=11%, signal=18%
ST_TUMOR_NECROSIS_FACTOR_PATHWAY	ST_TUMOR_NECROSIS_FACTOR_PATHWAY		28	-0.29293963	-0.98428696	0.47933885	0.6706865	1	1491	tags=21%, list=8%, signal=23%
REACTOME_TRANSPORT_TO_THE_GOLGI_AND_SUBSEQUENT_MODIFICATION	REACTOME_TRANSPORT_TO_THE_GOLGI_AND_SUBSEQUENT_MODIFICATION		32	-0.28887928	-0.9823382	0.5	0.6756756	1	1989	tags=19%, list=11%, signal=21%
WANG_BARRETTS_ESOPHAGUS_AND_ESOPHAGUS_CANCER_DN	WANG_BARRETTS_ESOPHAGUS_AND_ESOPHAGUS_CANCER_DN		22	-0.30948767	-0.9816181	0.4979757	0.6773365	1	723	tags=14%, list=4%, signal=14%
PID_PTP1B_PATHWAY	PID_PTP1B_PATHWAY		41	-0.26494655	-0.9811832	0.44444445	0.677955	1	4126	tags=34%, list=23%, signal=44%
LEE_LIVER_CANCER_ACOX1_UP	LEE_LIVER_CANCER_ACOX1_UP		46	-0.2700205	-0.98096764	0.4790419	0.67809534	1	1857	tags=22%, list=10%, signal=24%
CUI_GLUCOSE_DEPRIVATION	CUI_GLUCOSE_DEPRIVATION		53	-0.2579331	-0.9808696	0.4915254	0.6778695	1	2849	tags=36%, list=16%, signal=42%
ZHAN_MULTIPLE_MYELOMA_MF_UP	ZHAN_MULTIPLE_MYELOMA_MF_UP		37	-0.27475247	-0.9802376	0.52040815	0.6790115	1	358	tags=11%, list=2%, signal=11%
LASTOWSKA_NEUROBLASTOMA_COPY_NUMBER_UP	LASTOWSKA_NEUROBLASTOMA_COPY_NUMBER_UP		163	-0.2103854	-0.9802113	0.53731346	0.67858124	1	2954	tags=22%, list=16%, signal=26%
HOFFMANN_PRE_BI_TO_LARGE_PRE_BII_LYMPHOCYTE_UP	HOFFMANN_PRE_BI_TO_LARGE_PRE_BII_LYMPHOCYTE_UP		29	-0.28616264	-0.97752166	0.51111114	0.6857068	1	664	tags=7%, list=4%, signal=7%
KEGG_TYPE_I_DIABETES_MELLITUS	KEGG_TYPE_I_DIABETES_MELLITUS		20	-0.3225053	-0.97678936	0.4798387	0.6871803	1	498	tags=10%, list=3%, signal=10%
ZHU_CMV_8_HR_DN	ZHU_CMV_8_HR_DN		49	-0.26258945	-0.97632337	0.50574714	0.68794256	1	3037	tags=31%, list=17%, signal=37%
REACTOME_CLEAVAGE_OF_GROWING_TRANSCRIPT_IN_THE_TERMINATION_REGION_	REACTOME_CLEAVAGE_OF_GROWING_TRANSCRIPT_IN_THE_TERMINATION_REGION_		42	-0.26549602	-0.97626185	0.48214287	0.68759495	1	4852	tags=48%, list=27%, signal=65%
TING_SILENCED_BY_DICER	TING_SILENCED_BY_DICER		23	-0.30733907	-0.9753275	0.492126	0.68981355	1	1951	tags=30%, list=11%, signal=34%
REACTOME_ACTIVATION_OF_THE_MRNA_UPON_BINDING_OF_THE_CAP_BINDING_COMPLEX_AND_EIFS_AND_SUBSEQUENT_BINDING_TO_43S	REACTOME_ACTIVATION_OF_THE_MRNA_UPON_BINDING_OF_THE_CAP_BINDING_COMPLEX_AND_EIFS_AND_SUBSEQUENT_BINDING_TO_43S		55	-0.25449014	-0.9748198	0.5081967	0.6907799	1	3779	tags=20%, list=21%, signal=25%
SEIDEN_ONCOGENESIS_BY_MET	SEIDEN_ONCOGENESIS_BY_MET		84	-0.23554607	-0.97479427	0.528	0.6903441	1	4833	tags=42%, list=27%, signal=57%
YUAN_ZNF143_PARTNERS	YUAN_ZNF143_PARTNERS		21	-0.31835005	-0.97452277	0.492	0.6905947	1	4153	tags=43%, list=23%, signal=56%
ST_G_ALPHA_I_PATHWAY	ST_G_ALPHA_I_PATHWAY		32	-0.28695187	-0.9743681	0.48034933	0.6905484	1	2247	tags=16%, list=12%, signal=18%
MORI_SMALL_PRE_BII_LYMPHOCYTE_UP	MORI_SMALL_PRE_BII_LYMPHOCYTE_UP		70	-0.24497153	-0.9738814	0.5037594	0.6914679	1	1786	tags=14%, list=10%, signal=16%
WANG_CLIM2_TARGETS_UP	WANG_CLIM2_TARGETS_UP		213	-0.20476033	-0.9716682	0.5625	0.6970845	1	3022	tags=22%, list=17%, signal=26%
NADERI_BREAST_CANCER_PROGNOSIS_DN	NADERI_BREAST_CANCER_PROGNOSIS_DN		15	-0.3342533	-0.9715676	0.4642857	0.69683266	1	1974	tags=27%, list=11%, signal=30%
PID_HIF1_TFPATHWAY	PID_HIF1_TFPATHWAY		59	-0.2469644	-0.9699463	0.51955307	0.70078075	1	2910	tags=31%, list=16%, signal=36%
WATANABE_RECTAL_CANCER_RADIOTHERAPY_RESPONSIVE_DN	WATANABE_RECTAL_CANCER_RADIOTHERAPY_RESPONSIVE_DN		83	-0.23293628	-0.9677942	0.51937985	0.7063533	1	3658	tags=25%, list=20%, signal=32%
ABRAHAM_ALPC_VS_MULTIPLE_MYELOMA_UP	ABRAHAM_ALPC_VS_MULTIPLE_MYELOMA_UP		24	-0.31036082	-0.96710443	0.49779737	0.7078355	1	2238	tags=25%, list=12%, signal=29%
CHEN_PDGF_TARGETS	CHEN_PDGF_TARGETS		18	-0.3229369	-0.966964	0.45038167	0.7077815	1	12219	tags=100%, list=68%, signal=310%
KYNG_RESPONSE_TO_H2O2_VIA_ERCC6_UP	KYNG_RESPONSE_TO_H2O2_VIA_ERCC6_UP		36	-0.27268395	-0.9667358	0.50769234	0.70793205	1	3569	tags=31%, list=20%, signal=38%
MATZUK_CENTRAL_FOR_FEMALE_FERTILITY	MATZUK_CENTRAL_FOR_FEMALE_FERTILITY		16	-0.34188375	-0.9650235	0.49264705	0.7122168	1	312	tags=13%, list=2%, signal=13%
DITTMER_PTHLH_TARGETS_DN	DITTMER_PTHLH_TARGETS_DN		66	-0.24469794	-0.963171	0.5	0.717029	1	4111	tags=35%, list=23%, signal=45%
NEMETH_INFLAMMATORY_RESPONSE_LPS_UP	NEMETH_INFLAMMATORY_RESPONSE_LPS_UP		70	-0.2368229	-0.9630895	0.5822785	0.71673673	1	3084	tags=33%, list=17%, signal=39%
FAELT_B_CLL_WITH_VH3_21_UP	FAELT_B_CLL_WITH_VH3_21_UP		40	-0.26669014	-0.962818	0.54418606	0.71697074	1	3467	tags=25%, list=19%, signal=31%
REACTOME_ABCA_TRANSPORTERS_IN_LIPID_HOMEOSTASIS	REACTOME_ABCA_TRANSPORTERS_IN_LIPID_HOMEOSTASIS		15	-0.34168732	-0.962709	0.50566036	0.71676975	1	1399	tags=20%, list=8%, signal=22%
JAZAG_TGFB1_SIGNALING_VIA_SMAD4_DN	JAZAG_TGFB1_SIGNALING_VIA_SMAD4_DN		47	-0.25652808	-0.9625587	0.5759494	0.7166617	1	1535	tags=15%, list=9%, signal=16%
SHIN_B_CELL_LYMPHOMA_CLUSTER_3	SHIN_B_CELL_LYMPHOMA_CLUSTER_3		18	-0.33028635	-0.96252304	0.5	0.716237	1	4429	tags=56%, list=25%, signal=74%
GRAESSMANN_APOPTOSIS_BY_SERUM_DEPRIVATION_UP	GRAESSMANN_APOPTOSIS_BY_SERUM_DEPRIVATION_UP		448	-0.18878375	-0.96181095	0.8	0.7176846	1	3330	tags=26%, list=18%, signal=32%
GENTILE_UV_RESPONSE_CLUSTER_D5	GENTILE_UV_RESPONSE_CLUSTER_D5		36	-0.27046743	-0.96116376	0.51724136	0.7189448	1	1222	tags=11%, list=7%, signal=12%
PID_PDGFRB_PATHWAY	PID_PDGFRB_PATHWAY		119	-0.21678084	-0.9601898	0.5851064	0.7211182	1	3128	tags=22%, list=17%, signal=26%
BALDWIN_PRKCI_TARGETS_UP	BALDWIN_PRKCI_TARGETS_UP		29	-0.28493175	-0.96003115	0.5296804	0.72102207	1	3298	tags=34%, list=18%, signal=42%
XU_CREBBP_TARGETS_UP	XU_CREBBP_TARGETS_UP		22	-0.30534893	-0.9599754	0.49802372	0.72063965	1	3480	tags=45%, list=19%, signal=56%
DAZARD_RESPONSE_TO_UV_SCC_DN	DAZARD_RESPONSE_TO_UV_SCC_DN		117	-0.2141974	-0.9597642	0.6315789	0.72068065	1	3676	tags=29%, list=20%, signal=36%
GROSS_HYPOXIA_VIA_ELK3_ONLY_DN	GROSS_HYPOXIA_VIA_ELK3_ONLY_DN		40	-0.2725377	-0.9596525	0.54594594	0.7204208	1	4077	tags=45%, list=23%, signal=58%
KEGG_GLYCOSPHINGOLIPID_BIOSYNTHESIS_LACTO_AND_NEOLACTO_SERIES	KEGG_GLYCOSPHINGOLIPID_BIOSYNTHESIS_LACTO_AND_NEOLACTO_SERIES		18	-0.32628584	-0.9595689	0.51282054	0.7201282	1	2593	tags=33%, list=14%, signal=39%
TERAO_AOX4_TARGETS_SKIN_UP	TERAO_AOX4_TARGETS_SKIN_UP		35	-0.28031054	-0.95917445	0.52073735	0.7206804	1	2474	tags=20%, list=14%, signal=23%
FERREIRA_EWINGS_SARCOMA_UNSTABLE_VS_STABLE_DN	FERREIRA_EWINGS_SARCOMA_UNSTABLE_VS_STABLE_DN		80	-0.23138405	-0.95889217	0.552	0.72097355	1	1095	tags=14%, list=6%, signal=15%
RICKMAN_TUMOR_DIFFERENTIATED_WELL_VS_POORLY_DN	RICKMAN_TUMOR_DIFFERENTIATED_WELL_VS_POORLY_DN		308	-0.19716094	-0.95796114	0.73333335	0.72301245	1	2863	tags=21%, list=16%, signal=25%
NIELSEN_SYNOVIAL_SARCOMA_DN	NIELSEN_SYNOVIAL_SARCOMA_DN		15	-0.33863947	-0.95757514	0.52868855	0.7235712	1	2617	tags=33%, list=15%, signal=39%
BIOCARTA_FMLP_PATHWAY	BIOCARTA_FMLP_PATHWAY		31	-0.2802652	-0.957097	0.5	0.7242845	1	4025	tags=42%, list=22%, signal=54%
ZHENG_FOXP3_TARGETS_IN_THYMUS_UP	ZHENG_FOXP3_TARGETS_IN_THYMUS_UP		172	-0.20672904	-0.95586985	0.6603774	0.72710276	1	2591	tags=19%, list=14%, signal=22%
LEE_AGING_MUSCLE_DN	LEE_AGING_MUSCLE_DN		42	-0.25626218	-0.9552648	0.55440414	0.72828263	1	3808	tags=36%, list=21%, signal=45%
MARIADASON_RESPONSE_TO_BUTYRATE_SULINDAC_6	MARIADASON_RESPONSE_TO_BUTYRATE_SULINDAC_6		45	-0.25701872	-0.9552059	0.58152175	0.72790223	1	3301	tags=33%, list=18%, signal=41%
REACTOME_THE_ROLE_OF_NEF_IN_HIV1_REPLICATION_AND_DISEASE_PATHOGENESIS	REACTOME_THE_ROLE_OF_NEF_IN_HIV1_REPLICATION_AND_DISEASE_PATHOGENESIS		23	-0.31490526	-0.9549278	0.51865673	0.7282103	1	1538	tags=13%, list=9%, signal=14%
GRADE_COLON_CANCER_DN	GRADE_COLON_CANCER_DN		26	-0.29308617	-0.95439094	0.51836735	0.72919416	1	1753	tags=15%, list=10%, signal=17%
REACTOME_INTERACTIONS_OF_VPR_WITH_HOST_CELLULAR_PROTEINS	REACTOME_INTERACTIONS_OF_VPR_WITH_HOST_CELLULAR_PROTEINS		32	-0.27609175	-0.95402366	0.52238804	0.7296752	1	3095	tags=31%, list=17%, signal=38%
BONOME_OVARIAN_CANCER_SURVIVAL_OPTIMAL_DEBULKING	BONOME_OVARIAN_CANCER_SURVIVAL_OPTIMAL_DEBULKING		206	-0.20016196	-0.9538426	0.68421054	0.72963524	1	2093	tags=15%, list=12%, signal=16%
BIOCARTA_TFF_PATHWAY	BIOCARTA_TFF_PATHWAY		19	-0.3162566	-0.9535121	0.53754944	0.7300609	1	5658	tags=63%, list=31%, signal=92%
REACTOME_RNA_POL_II_PRE_TRANSCRIPTION_EVENTS	REACTOME_RNA_POL_II_PRE_TRANSCRIPTION_EVENTS		54	-0.24439749	-0.95329356	0.5879121	0.7301117	1	13643	tags=100%, list=76%, signal=409%
MIKKELSEN_MCV6_ICP_WITH_H3K4ME3_AND_H3K27ME3	MIKKELSEN_MCV6_ICP_WITH_H3K4ME3_AND_H3K27ME3		23	-0.30127198	-0.9531146	0.5436508	0.73007095	1	2404	tags=26%, list=13%, signal=30%
GUO_HEX_TARGETS_UP	GUO_HEX_TARGETS_UP		77	-0.23234467	-0.95141494	0.5886525	0.734139	1	4526	tags=45%, list=25%, signal=60%
REACTOME_TRIF_MEDIATED_TLR3_SIGNALING	REACTOME_TRIF_MEDIATED_TLR3_SIGNALING		68	-0.23686594	-0.9512895	0.5378788	0.73393583	1	4806	tags=43%, list=27%, signal=58%
BIOCARTA_ERK_PATHWAY	BIOCARTA_ERK_PATHWAY		26	-0.29016522	-0.95116776	0.54077256	0.733766	1	4686	tags=38%, list=26%, signal=52%
AMUNDSON_GENOTOXIC_SIGNATURE	AMUNDSON_GENOTOXIC_SIGNATURE		89	-0.23038471	-0.9502658	0.5673077	0.73571754	1	1580	tags=20%, list=9%, signal=22%
WEIGEL_OXIDATIVE_STRESS_BY_TBH_AND_H2O2	WEIGEL_OXIDATIVE_STRESS_BY_TBH_AND_H2O2		32	-0.273385	-0.9497382	0.5296804	0.73667157	1	4438	tags=47%, list=25%, signal=62%
NATSUME_RESPONSE_TO_INTERFERON_BETA_DN	NATSUME_RESPONSE_TO_INTERFERON_BETA_DN		47	-0.25268266	-0.9486047	0.52884614	0.7392885	1	4730	tags=43%, list=26%, signal=58%
REACTOME_REGULATION_OF_HYPOXIA_INDUCIBLE_FACTOR_HIF_BY_OXYGEN	REACTOME_REGULATION_OF_HYPOXIA_INDUCIBLE_FACTOR_HIF_BY_OXYGEN		22	-0.29519466	-0.9484172	0.503876	0.73926204	1	1715	tags=14%, list=10%, signal=15%
HUPER_BREAST_BASAL_VS_LUMINAL_UP	HUPER_BREAST_BASAL_VS_LUMINAL_UP		29	-0.28069535	-0.94795626	0.58744395	0.7399675	1	1101	tags=17%, list=6%, signal=18%
BIOCARTA_CCR3_PATHWAY	BIOCARTA_CCR3_PATHWAY		18	-0.3120595	-0.9470822	0.5344828	0.74191433	1	12415	tags=100%, list=69%, signal=321%
HAN_JNK_SINGALING_DN	HAN_JNK_SINGALING_DN		30	-0.28253505	-0.9467627	0.54028434	0.74223053	1	2266	tags=23%, list=13%, signal=27%
MACLACHLAN_BRCA1_TARGETS_UP	MACLACHLAN_BRCA1_TARGETS_UP		20	-0.3081518	-0.94662064	0.5471698	0.74211276	1	3414	tags=35%, list=19%, signal=43%
PID_EPHA_FWDPATHWAY	PID_EPHA_FWDPATHWAY		24	-0.29216817	-0.94623464	0.5065502	0.7426607	1	3074	tags=29%, list=17%, signal=35%
PID_AMB2_NEUTROPHILS_PATHWAY	PID_AMB2_NEUTROPHILS_PATHWAY		29	-0.2830112	-0.9461362	0.5228216	0.742426	1	518	tags=10%, list=3%, signal=11%
SESTO_RESPONSE_TO_UV_C3	SESTO_RESPONSE_TO_UV_C3		20	-0.31083483	-0.9460684	0.52244896	0.7420892	1	2867	tags=40%, list=16%, signal=48%
KYNG_ENVIRONMENTAL_STRESS_RESPONSE_UP	KYNG_ENVIRONMENTAL_STRESS_RESPONSE_UP		50	-0.25104886	-0.94593513	0.5568182	0.74192065	1	3946	tags=42%, list=22%, signal=54%
KESHELAVA_MULTIPLE_DRUG_RESISTANCE	KESHELAVA_MULTIPLE_DRUG_RESISTANCE		75	-0.23036106	-0.94579667	0.61904764	0.7417646	1	2858	tags=20%, list=16%, signal=24%
HINATA_NFKB_TARGETS_FIBROBLAST_UP	HINATA_NFKB_TARGETS_FIBROBLAST_UP		73	-0.2265076	-0.9454345	0.56028366	0.7423085	1	2495	tags=26%, list=14%, signal=30%
BILD_SRC_ONCOGENIC_SIGNATURE	BILD_SRC_ONCOGENIC_SIGNATURE		59	-0.23955199	-0.9446493	0.56969696	0.74394953	1	1324	tags=17%, list=7%, signal=18%
BIOCARTA_ATRBRCA_PATHWAY	BIOCARTA_ATRBRCA_PATHWAY		21	-0.30957243	-0.94434685	0.5505618	0.74419016	1	2504	tags=29%, list=14%, signal=33%
KEGG_CHRONIC_MYELOID_LEUKEMIA	KEGG_CHRONIC_MYELOID_LEUKEMIA		70	-0.23885906	-0.9440964	0.589404	0.7443469	1	3012	tags=23%, list=17%, signal=27%
KEGG_PATHWAYS_IN_CANCER	KEGG_PATHWAYS_IN_CANCER		281	-0.19898254	-0.9432798	0.6111111	0.74608076	1	1857	tags=15%, list=10%, signal=17%
REACTOME_SYNTHESIS_OF_PA	REACTOME_SYNTHESIS_OF_PA		18	-0.3187476	-0.942708	0.4907749	0.7471616	1	2745	tags=33%, list=15%, signal=39%
WAMUNYOKOLI_OVARIAN_CANCER_LMP_UP	WAMUNYOKOLI_OVARIAN_CANCER_LMP_UP		221	-0.19533679	-0.94238144	0.6666667	0.7475334	1	3270	tags=24%, list=18%, signal=28%
OUELLET_CULTURED_OVARIAN_CANCER_INVASIVE_VS_LMP_UP	OUELLET_CULTURED_OVARIAN_CANCER_INVASIVE_VS_LMP_UP		65	-0.24058677	-0.94223505	0.6486486	0.7474674	1	3596	tags=31%, list=20%, signal=38%
NADLER_HYPERGLYCEMIA_AT_OBESITY	NADLER_HYPERGLYCEMIA_AT_OBESITY		50	-0.25408018	-0.94156593	0.5952381	0.7488029	1	3180	tags=26%, list=18%, signal=31%
BIOCARTA_TOLL_PATHWAY	BIOCARTA_TOLL_PATHWAY		35	-0.26862812	-0.9412651	0.5714286	0.74905604	1	326	tags=6%, list=2%, signal=6%
SHETH_LIVER_CANCER_VS_TXNIP_LOSS_PAM1	SHETH_LIVER_CANCER_VS_TXNIP_LOSS_PAM1		189	-0.20381443	-0.94015276	0.64705884	0.751583	1	3193	tags=29%, list=18%, signal=34%
KEGG_GALACTOSE_METABOLISM	KEGG_GALACTOSE_METABOLISM		20	-0.30722696	-0.9395034	0.60966545	0.7528188	1	2890	tags=30%, list=16%, signal=36%
BAUS_TFF2_TARGETS_UP	BAUS_TFF2_TARGETS_UP		18	-0.3145951	-0.9389894	0.51171875	0.7535947	1	3446	tags=44%, list=19%, signal=55%
LUI_TARGETS_OF_PAX8_PPARG_FUSION	LUI_TARGETS_OF_PAX8_PPARG_FUSION		33	-0.26033103	-0.93863064	0.5797101	0.75407004	1	13351	tags=100%, list=74%, signal=384%
MYLLYKANGAS_AMPLIFICATION_HOT_SPOT_17	MYLLYKANGAS_AMPLIFICATION_HOT_SPOT_17		16	-0.32477215	-0.9385762	0.5314685	0.75365794	1	4410	tags=50%, list=24%, signal=66%
MARTINEZ_TP53_TARGETS_UP	MARTINEZ_TP53_TARGETS_UP		478	-0.18323335	-0.9381831	1	0.754205	1	3011	tags=23%, list=17%, signal=26%
BURTON_ADIPOGENESIS_12	BURTON_ADIPOGENESIS_12		32	-0.2778008	-0.93736744	0.54545456	0.75601345	1	3441	tags=38%, list=19%, signal=46%
RASHI_NFKB1_TARGETS	RASHI_NFKB1_TARGETS		16	-0.3339939	-0.9366983	0.5272727	0.75733656	1	2300	tags=44%, list=13%, signal=50%
XU_GH1_EXOGENOUS_TARGETS_UP	XU_GH1_EXOGENOUS_TARGETS_UP		54	-0.24537954	-0.93668234	0.5898876	0.75685686	1	1900	tags=17%, list=11%, signal=19%
WINTER_HYPOXIA_DN	WINTER_HYPOXIA_DN		31	-0.27602714	-0.93625844	0.5506608	0.7574587	1	2215	tags=26%, list=12%, signal=29%
TAKEDA_TARGETS_OF_NUP98_HOXA9_FUSION_6HR_UP	TAKEDA_TARGETS_OF_NUP98_HOXA9_FUSION_6HR_UP		59	-0.23891422	-0.9353266	0.64942527	0.75944537	1	2365	tags=25%, list=13%, signal=29%
SANSOM_APC_MYC_TARGETS	SANSOM_APC_MYC_TARGETS		197	-0.19764714	-0.9338088	0.7297297	0.7630994	1	3843	tags=28%, list=21%, signal=35%
NAKAYAMA_FRA2_TARGETS	NAKAYAMA_FRA2_TARGETS		36	-0.26258555	-0.93355256	0.558952	0.7632463	1	2287	tags=22%, list=13%, signal=25%
YIH_RESPONSE_TO_ARSENITE_C1	YIH_RESPONSE_TO_ARSENITE_C1		22	-0.29647177	-0.93210757	0.5714286	0.76656926	1	2294	tags=32%, list=13%, signal=36%
BROWNE_HCMV_INFECTION_24HR_UP	BROWNE_HCMV_INFECTION_24HR_UP		130	-0.20821047	-0.93173826	0.70666665	0.76699936	1	2403	tags=20%, list=13%, signal=23%
DAZARD_RESPONSE_TO_UV_SCC_UP	DAZARD_RESPONSE_TO_UV_SCC_UP		109	-0.21756713	-0.93087566	0.7010309	0.76871294	1	2729	tags=22%, list=15%, signal=26%
ZHAN_V1_LATE_DIFFERENTIATION_GENES_UP	ZHAN_V1_LATE_DIFFERENTIATION_GENES_UP		29	-0.28046313	-0.930849	0.56578946	0.76826495	1	2492	tags=28%, list=14%, signal=32%
ABE_INNER_EAR	ABE_INNER_EAR		40	-0.2566147	-0.9302208	0.54751134	0.7693609	1	1132	tags=15%, list=6%, signal=16%
BIOCARTA_MYOSIN_PATHWAY	BIOCARTA_MYOSIN_PATHWAY		26	-0.28598157	-0.92935634	0.5936255	0.7712348	1	2619	tags=23%, list=15%, signal=27%
BILBAN_B_CLL_LPL_DN	BILBAN_B_CLL_LPL_DN		35	-0.26753533	-0.9292636	0.59	0.77092415	1	2821	tags=37%, list=16%, signal=44%
KEGG_T_CELL_RECEPTOR_SIGNALING_PATHWAY	KEGG_T_CELL_RECEPTOR_SIGNALING_PATHWAY		81	-0.22154483	-0.928819	0.61946905	0.7715632	1	1461	tags=10%, list=8%, signal=11%
BURTON_ADIPOGENESIS_11	BURTON_ADIPOGENESIS_11		53	-0.24044509	-0.9284749	0.6193182	0.7719296	1	2510	tags=23%, list=14%, signal=26%
CHIANG_LIVER_CANCER_SUBCLASS_INTERFERON_UP	CHIANG_LIVER_CANCER_SUBCLASS_INTERFERON_UP		15	-0.32122478	-0.9272195	0.5671642	0.77463603	1	764	tags=20%, list=4%, signal=21%
KYNG_DNA_DAMAGE_BY_UV	KYNG_DNA_DAMAGE_BY_UV		54	-0.23923919	-0.9270582	0.56613755	0.7745643	1	2231	tags=20%, list=12%, signal=23%
YAO_TEMPORAL_RESPONSE_TO_PROGESTERONE_CLUSTER_11	YAO_TEMPORAL_RESPONSE_TO_PROGESTERONE_CLUSTER_11		95	-0.21354428	-0.9270431	0.6923077	0.7740733	1	3731	tags=27%, list=21%, signal=34%
REACTOME_COSTIMULATION_BY_THE_CD28_FAMILY	REACTOME_COSTIMULATION_BY_THE_CD28_FAMILY		48	-0.24224606	-0.92695355	0.5505618	0.7737499	1	774	tags=4%, list=4%, signal=4%
LIU_SOX4_TARGETS_DN	LIU_SOX4_TARGETS_DN		283	-0.19577298	-0.92651623	0.7647059	0.7745052	1	3842	tags=27%, list=21%, signal=33%
MATZUK_EMBRYONIC_GERM_CELL	MATZUK_EMBRYONIC_GERM_CELL		16	-0.31836018	-0.925941	0.5218855	0.77552426	1	3227	tags=38%, list=18%, signal=46%
XU_GH1_AUTOCRINE_TARGETS_DN	XU_GH1_AUTOCRINE_TARGETS_DN		117	-0.2051323	-0.92466414	0.6666667	0.7785419	1	3030	tags=23%, list=17%, signal=28%
RAMASWAMY_METASTASIS_UP	RAMASWAMY_METASTASIS_UP		63	-0.22944273	-0.92418927	0.7094595	0.7792915	1	3928	tags=29%, list=22%, signal=36%
PID_TRKR_PATHWAY	PID_TRKR_PATHWAY		57	-0.23565654	-0.9239553	0.65625	0.77938575	1	799	tags=7%, list=4%, signal=7%
REACTOME_PEPTIDE_CHAIN_ELONGATION	REACTOME_PEPTIDE_CHAIN_ELONGATION		83	-0.22173807	-0.923772	0.65833336	0.7793117	1	10938	tags=96%, list=61%, signal=244%
WILLIAMS_ESR1_TARGETS_UP	WILLIAMS_ESR1_TARGETS_UP		22	-0.2911508	-0.9231575	0.58270675	0.7803556	1	2279	tags=41%, list=13%, signal=47%
KYNG_ENVIRONMENTAL_STRESS_RESPONSE_DN	KYNG_ENVIRONMENTAL_STRESS_RESPONSE_DN		17	-0.31958464	-0.92287874	0.5458167	0.7805568	1	3523	tags=41%, list=20%, signal=51%
REACTOME_HEPARAN_SULFATE_HEPARIN_HS_GAG_METABOLISM	REACTOME_HEPARAN_SULFATE_HEPARIN_HS_GAG_METABOLISM		46	-0.2426462	-0.92274344	0.6042781	0.78038305	1	1257	tags=17%, list=7%, signal=19%
REACTOME_TIGHT_JUNCTION_INTERACTIONS	REACTOME_TIGHT_JUNCTION_INTERACTIONS		15	-0.3260556	-0.9225653	0.5555556	0.780358	1	3579	tags=47%, list=20%, signal=58%
KEGG_LONG_TERM_POTENTIATION	KEGG_LONG_TERM_POTENTIATION		57	-0.24464972	-0.922322	0.6242038	0.7804354	1	2247	tags=19%, list=12%, signal=22%
CREIGHTON_ENDOCRINE_THERAPY_RESISTANCE_4	CREIGHTON_ENDOCRINE_THERAPY_RESISTANCE_4		263	-0.18378882	-0.9216921	0.8	0.78146225	1	2265	tags=18%, list=13%, signal=20%
KAAB_FAILED_HEART_ATRIUM_DN	KAAB_FAILED_HEART_ATRIUM_DN		132	-0.20158364	-0.9211869	0.77922076	0.78231317	1	4749	tags=41%, list=26%, signal=55%
BIOCARTA_UCALPAIN_PATHWAY	BIOCARTA_UCALPAIN_PATHWAY		17	-0.32473263	-0.92037636	0.5494506	0.78390646	1	2122	tags=18%, list=12%, signal=20%
ABE_VEGFA_TARGETS	ABE_VEGFA_TARGETS		15	-0.32078514	-0.9176087	0.55172414	0.79050803	1	1689	tags=27%, list=9%, signal=29%
NIKOLSKY_BREAST_CANCER_6P24_P22_AMPLICON	NIKOLSKY_BREAST_CANCER_6P24_P22_AMPLICON		20	-0.30273455	-0.91657776	0.5335821	0.7927094	1	2523	tags=35%, list=14%, signal=41%
DUNNE_TARGETS_OF_AML1_MTG8_FUSION_UP	DUNNE_TARGETS_OF_AML1_MTG8_FUSION_UP		34	-0.2661257	-0.9165477	0.6411483	0.7922855	1	2811	tags=32%, list=16%, signal=38%
JIANG_VHL_TARGETS	JIANG_VHL_TARGETS		129	-0.20895238	-0.9161393	0.65822786	0.79285157	1	4105	tags=34%, list=23%, signal=44%
REACTOME_REGULATION_OF_INSULIN_SECRETION_BY_GLUCAGON_LIKE_PEPTIDE1	REACTOME_REGULATION_OF_INSULIN_SECRETION_BY_GLUCAGON_LIKE_PEPTIDE1		34	-0.251805	-0.91580766	0.60952383	0.7932297	1	3165	tags=32%, list=18%, signal=39%
KAYO_CALORIE_RESTRICTION_MUSCLE_UP	KAYO_CALORIE_RESTRICTION_MUSCLE_UP		76	-0.22571778	-0.91554976	0.70866144	0.79340816	1	2956	tags=22%, list=16%, signal=27%
OUYANG_PROSTATE_CANCER_PROGRESSION_DN	OUYANG_PROSTATE_CANCER_PROGRESSION_DN		18	-0.31000292	-0.91543365	0.5882353	0.79315525	1	3250	tags=33%, list=18%, signal=41%
REACTOME_GLUCOSE_TRANSPORT	REACTOME_GLUCOSE_TRANSPORT		33	-0.26946157	-0.9143632	0.6350711	0.7953867	1	4597	tags=45%, list=25%, signal=61%
HOEBEKE_LYMPHOID_STEM_CELL_UP	HOEBEKE_LYMPHOID_STEM_CELL_UP		78	-0.22484982	-0.91401464	0.69924814	0.7957472	1	3179	tags=24%, list=18%, signal=29%
NIKOLSKY_BREAST_CANCER_17Q21_Q25_AMPLICON	NIKOLSKY_BREAST_CANCER_17Q21_Q25_AMPLICON		247	-0.19062506	-0.9129369	0.7407407	0.79799765	1	1754	tags=11%, list=10%, signal=12%
REACTOME_INFLUENZA_VIRAL_RNA_TRANSCRIPTION_AND_REPLICATION	REACTOME_INFLUENZA_VIRAL_RNA_TRANSCRIPTION_AND_REPLICATION		99	-0.20897388	-0.9123797	0.7614679	0.7989427	1	11326	tags=96%, list=63%, signal=256%
SAKAI_TUMOR_INFILTRATING_MONOCYTES_UP	SAKAI_TUMOR_INFILTRATING_MONOCYTES_UP		26	-0.2765918	-0.91185534	0.60580915	0.7997126	1	959	tags=12%, list=5%, signal=12%
BILD_CTNNB1_ONCOGENIC_SIGNATURE	BILD_CTNNB1_ONCOGENIC_SIGNATURE		75	-0.22188447	-0.91139203	0.6830986	0.8004776	1	4063	tags=35%, list=23%, signal=45%
CREIGHTON_ENDOCRINE_THERAPY_RESISTANCE_1	CREIGHTON_ENDOCRINE_THERAPY_RESISTANCE_1		457	-0.18608841	-0.9105195	1	0.80220765	1	3191	tags=25%, list=18%, signal=30%
BAE_BRCA1_TARGETS_UP	BAE_BRCA1_TARGETS_UP		69	-0.225498	-0.91046876	0.65789473	0.8017801	1	2821	tags=29%, list=16%, signal=34%
KUMAR_TARGETS_OF_MLL_AF9_FUSION	KUMAR_TARGETS_OF_MLL_AF9_FUSION		301	-0.17969301	-0.9101078	0.85714287	0.80215293	1	3158	tags=22%, list=18%, signal=27%
IIZUKA_LIVER_CANCER_PROGRESSION_G1_G2_DN	IIZUKA_LIVER_CANCER_PROGRESSION_G1_G2_DN		24	-0.27831253	-0.9090415	0.59302324	0.80433595	1	2265	tags=17%, list=13%, signal=19%
REACTOME_INHIBITION_OF_VOLTAGE_GATED_CA2_CHANNELS_VIA_GBETA_GAMMA_SUBUNITS	REACTOME_INHIBITION_OF_VOLTAGE_GATED_CA2_CHANNELS_VIA_GBETA_GAMMA_SUBUNITS		17	-0.30534527	-0.90860295	0.5902778	0.8050063	1	19	tags=6%, list=0%, signal=6%
REACTOME_TRANSPORT_OF_MATURE_TRANSCRIPT_TO_CYTOPLASM	REACTOME_TRANSPORT_OF_MATURE_TRANSCRIPT_TO_CYTOPLASM		52	-0.23667166	-0.90852785	0.67582417	0.8046305	1	4410	tags=40%, list=24%, signal=53%
PID_NETRIN_PATHWAY	PID_NETRIN_PATHWAY		30	-0.27219543	-0.90792847	0.6059113	0.8056886	1	2902	tags=27%, list=16%, signal=32%
FLECHNER_BIOPSY_KIDNEY_TRANSPLANT_REJECTED_VS_OK_DN	FLECHNER_BIOPSY_KIDNEY_TRANSPLANT_REJECTED_VS_OK_DN		469	-0.17547569	-0.90714794	1	0.8072199	1	2559	tags=16%, list=14%, signal=18%
PID_P75_NTR_PATHWAY	PID_P75_NTR_PATHWAY		61	-0.22932038	-0.9069818	0.6602564	0.8071092	1	3698	tags=30%, list=21%, signal=37%
CHANG_CORE_SERUM_RESPONSE_DN	CHANG_CORE_SERUM_RESPONSE_DN		186	-0.18966801	-0.9057839	0.80851066	0.8095433	1	3593	tags=31%, list=20%, signal=39%
DAVICIONI_MOLECULAR_ARMS_VS_ERMS_UP	DAVICIONI_MOLECULAR_ARMS_VS_ERMS_UP		295	-0.18526316	-0.9051496	0.7619048	0.81060135	1	1828	tags=14%, list=10%, signal=15%
BROWNE_HCMV_INFECTION_10HR_DN	BROWNE_HCMV_INFECTION_10HR_DN		49	-0.2431948	-0.90454906	0.65405405	0.8116055	1	2399	tags=22%, list=13%, signal=26%
HUNSBERGER_EXERCISE_REGULATED_GENES	HUNSBERGER_EXERCISE_REGULATED_GENES		24	-0.2891994	-0.9043517	0.6111111	0.81157285	1	270	tags=8%, list=1%, signal=8%
WANG_TUMOR_INVASIVENESS_DN	WANG_TUMOR_INVASIVENESS_DN		197	-0.19592865	-0.9029623	0.8032787	0.81449986	1	4117	tags=30%, list=23%, signal=39%
YAMASHITA_LIVER_CANCER_STEM_CELL_UP	YAMASHITA_LIVER_CANCER_STEM_CELL_UP		38	-0.25255755	-0.9028121	0.65841585	0.81434095	1	3279	tags=37%, list=18%, signal=45%
YOSHIOKA_LIVER_CANCER_EARLY_RECURRENCE_UP	YOSHIOKA_LIVER_CANCER_EARLY_RECURRENCE_UP		32	-0.26455432	-0.9011091	0.62801933	0.8180939	1	2527	tags=22%, list=14%, signal=25%
REACTOME_MAP_KINASE_ACTIVATION_IN_TLR_CASCADE	REACTOME_MAP_KINASE_ACTIVATION_IN_TLR_CASCADE		49	-0.23378046	-0.90073705	0.63589746	0.8185257	1	4806	tags=45%, list=27%, signal=61%
PID_P53_REGULATION_PATHWAY	PID_P53_REGULATION_PATHWAY		58	-0.23677781	-0.89767337	0.6818182	0.8257591	1	4084	tags=29%, list=23%, signal=38%
YAGI_AML_RELAPSE_PROGNOSIS	YAGI_AML_RELAPSE_PROGNOSIS		33	-0.26461592	-0.89752316	0.6090909	0.8256131	1	2689	tags=24%, list=15%, signal=28%
HOLLEMAN_ASPARAGINASE_RESISTANCE_ALL_DN	HOLLEMAN_ASPARAGINASE_RESISTANCE_ALL_DN		23	-0.27916777	-0.8973585	0.6111111	0.8254818	1	4809	tags=35%, list=27%, signal=47%
REACTOME_OXYGEN_DEPENDENT_PROLINE_HYDROXYLATION_OF_HYPOXIA_INDUCIBLE_FACTOR_ALPHA	REACTOME_OXYGEN_DEPENDENT_PROLINE_HYDROXYLATION_OF_HYPOXIA_INDUCIBLE_FACTOR_ALPHA		16	-0.31568497	-0.896779	0.58984375	0.82637435	1	1715	tags=13%, list=10%, signal=14%
TIEN_INTESTINE_PROBIOTICS_6HR_DN	TIEN_INTESTINE_PROBIOTICS_6HR_DN		157	-0.19464396	-0.89651495	0.7826087	0.82650626	1	3222	tags=24%, list=18%, signal=28%
DORN_ADENOVIRUS_INFECTION_48HR_DN	DORN_ADENOVIRUS_INFECTION_48HR_DN		36	-0.25301847	-0.89597565	0.66210043	0.82728446	1	2867	tags=33%, list=16%, signal=40%
MARTINEZ_RB1_AND_TP53_TARGETS_UP	MARTINEZ_RB1_AND_TP53_TARGETS_UP		472	-0.17336334	-0.8957866	1	0.82717395	1	3028	tags=22%, list=17%, signal=26%
JAZAG_TGFB1_SIGNALING_DN	JAZAG_TGFB1_SIGNALING_DN		27	-0.27606186	-0.8952251	0.6	0.8280239	1	1920	tags=19%, list=11%, signal=21%
KEGG_NOTCH_SIGNALING_PATHWAY	KEGG_NOTCH_SIGNALING_PATHWAY		43	-0.24896716	-0.89492303	0.63580245	0.8281873	1	1857	tags=19%, list=10%, signal=21%
ELLWOOD_MYC_TARGETS_DN	ELLWOOD_MYC_TARGETS_DN		36	-0.2564114	-0.8947987	0.67431194	0.8279562	1	3047	tags=25%, list=17%, signal=30%
BIOCARTA_RAC1_PATHWAY	BIOCARTA_RAC1_PATHWAY		19	-0.28901747	-0.8932281	0.6360153	0.8314319	1	3225	tags=32%, list=18%, signal=38%
LAU_APOPTOSIS_CDKN2A_UP	LAU_APOPTOSIS_CDKN2A_UP		54	-0.22920987	-0.89221597	0.71270716	0.8334072	1	2993	tags=26%, list=17%, signal=31%
BROWNE_HCMV_INFECTION_1HR_DN	BROWNE_HCMV_INFECTION_1HR_DN		176	-0.19393998	-0.8915732	0.78688526	0.8344689	1	3723	tags=30%, list=21%, signal=37%
MULLIGHAN_NPM1_MUTATED_SIGNATURE_2_UP	MULLIGHAN_NPM1_MUTATED_SIGNATURE_2_UP		113	-0.20264281	-0.8911137	0.7710843	0.83508295	1	3337	tags=25%, list=19%, signal=30%
REACTOME_CYTOSOLIC_TRNA_AMINOACYLATION	REACTOME_CYTOSOLIC_TRNA_AMINOACYLATION		24	-0.2843441	-0.8909516	0.6666667	0.8349535	1	10688	tags=96%, list=59%, signal=235%
GARGALOVIC_RESPONSE_TO_OXIDIZED_PHOSPHOLIPIDS_BLUE_DN	GARGALOVIC_RESPONSE_TO_OXIDIZED_PHOSPHOLIPIDS_BLUE_DN		52	-0.23187633	-0.88832647	0.6904762	0.84093684	1	2677	tags=25%, list=15%, signal=29%
PID_VEGFR1_PATHWAY	PID_VEGFR1_PATHWAY		26	-0.28033382	-0.8866728	0.65217394	0.84455866	1	3645	tags=38%, list=20%, signal=48%
BIOCARTA_WNT_PATHWAY	BIOCARTA_WNT_PATHWAY		24	-0.27370384	-0.8863803	0.65254235	0.8446236	1	4322	tags=29%, list=24%, signal=38%
PUIFFE_INVASION_INHIBITED_BY_ASCITES_DN	PUIFFE_INVASION_INHIBITED_BY_ASCITES_DN		140	-0.19283189	-0.8860299	0.8518519	0.8449119	1	3098	tags=24%, list=17%, signal=28%
KEGG_ENDOMETRIAL_CANCER	KEGG_ENDOMETRIAL_CANCER		49	-0.23438361	-0.88530177	0.70212764	0.8461265	1	3698	tags=31%, list=21%, signal=38%
ST_INTERLEUKIN_4_PATHWAY	ST_INTERLEUKIN_4_PATHWAY		20	-0.29788134	-0.88490427	0.6333333	0.8465771	1	690	tags=10%, list=4%, signal=10%
KEGG_NATURAL_KILLER_CELL_MEDIATED_CYTOTOXICITY	KEGG_NATURAL_KILLER_CELL_MEDIATED_CYTOTOXICITY		74	-0.22056031	-0.8848335	0.7364865	0.84614253	1	2422	tags=22%, list=13%, signal=25%
TRAYNOR_RETT_SYNDROM_DN	TRAYNOR_RETT_SYNDROM_DN		15	-0.30368543	-0.88409996	0.63272727	0.8474301	1	491	tags=13%, list=3%, signal=14%
PID_ERBB4_PATHWAY	PID_ERBB4_PATHWAY		32	-0.25725585	-0.8840463	0.6650718	0.8469785	1	2422	tags=31%, list=13%, signal=36%
REACTOME_RNA_POL_II_TRANSCRIPTION_PRE_INITIATION_AND_PROMOTER_OPENING	REACTOME_RNA_POL_II_TRANSCRIPTION_PRE_INITIATION_AND_PROMOTER_OPENING		39	-0.2441938	-0.8838787	0.6980198	0.8467692	1	13643	tags=100%, list=76%, signal=410%
PID_FOXO_PATHWAY	PID_FOXO_PATHWAY		46	-0.23895504	-0.8830548	0.6958525	0.8482095	1	3670	tags=28%, list=20%, signal=35%
LIU_COMMON_CANCER_GENES	LIU_COMMON_CANCER_GENES		65	-0.22152439	-0.8824924	0.7777778	0.8490267	1	2067	tags=15%, list=11%, signal=17%
JOHNSTONE_PARVB_TARGETS_3_UP	JOHNSTONE_PARVB_TARGETS_3_UP		400	-0.17814651	-0.88236195	1	0.8487904	1	1744	tags=14%, list=10%, signal=15%
ZHU_CMV_ALL_DN	ZHU_CMV_ALL_DN		111	-0.20544273	-0.880993	0.7708333	0.8514817	1	2821	tags=24%, list=16%, signal=29%
BIOCARTA_NOS1_PATHWAY	BIOCARTA_NOS1_PATHWAY		16	-0.30642384	-0.88071126	0.630597	0.8515881	1	3857	tags=38%, list=21%, signal=48%
REACTOME_EGFR_DOWNREGULATION	REACTOME_EGFR_DOWNREGULATION		23	-0.27687514	-0.8802926	0.68725866	0.8519964	1	1338	tags=13%, list=7%, signal=14%
REACTOME_SIGNALING_BY_CONSTITUTIVELY_ACTIVE_EGFR	REACTOME_SIGNALING_BY_CONSTITUTIVELY_ACTIVE_EGFR		17	-0.30311316	-0.87976986	0.6423077	0.85272133	1	3337	tags=29%, list=19%, signal=36%
WANG_LMO4_TARGETS_UP	WANG_LMO4_TARGETS_UP		333	-0.17520761	-0.8785927	0.9444444	0.85503614	1	3314	tags=24%, list=18%, signal=29%
KEGG_RIBOSOME	KEGG_RIBOSOME		85	-0.21414773	-0.8785614	0.766129	0.8545804	1	10938	tags=95%, list=61%, signal=241%
WIERENGA_PML_INTERACTOME	WIERENGA_PML_INTERACTOME		37	-0.24531741	-0.87740976	0.6609442	0.8567244	1	57	tags=3%, list=0%, signal=3%
HOFFMANN_PRE_BI_TO_LARGE_PRE_BII_LYMPHOCYTE_DN	HOFFMANN_PRE_BI_TO_LARGE_PRE_BII_LYMPHOCYTE_DN		61	-0.21975435	-0.8772509	0.7133758	0.85652924	1	2821	tags=26%, list=16%, signal=31%
ONDER_CDH1_TARGETS_3_UP	ONDER_CDH1_TARGETS_3_UP		16	-0.3041662	-0.8767005	0.6492537	0.85727686	1	1445	tags=19%, list=8%, signal=20%
YAGI_AML_WITH_T_9_11_TRANSLOCATION	YAGI_AML_WITH_T_9_11_TRANSLOCATION		111	-0.2007331	-0.87638813	0.7708333	0.8574756	1	3308	tags=23%, list=18%, signal=29%
WEI_MIR34A_TARGETS	WEI_MIR34A_TARGETS		142	-0.18780343	-0.8756623	0.8382353	0.85867476	1	2817	tags=20%, list=16%, signal=24%
PID_ERBB2_ERBB3_PATHWAY	PID_ERBB2_ERBB3_PATHWAY		42	-0.23809196	-0.87544423	0.70050764	0.8586385	1	4412	tags=36%, list=24%, signal=47%
KEGG_INOSITOL_PHOSPHATE_METABOLISM	KEGG_INOSITOL_PHOSPHATE_METABOLISM		50	-0.22923489	-0.875392	0.7398844	0.8582135	1	1576	tags=16%, list=9%, signal=17%
CHEN_NEUROBLASTOMA_COPY_NUMBER_GAINS	CHEN_NEUROBLASTOMA_COPY_NUMBER_GAINS		42	-0.23793231	-0.8752288	0.74509805	0.85804546	1	2441	tags=21%, list=14%, signal=25%
SIG_CD40PATHWAYMAP	SIG_CD40PATHWAYMAP		34	-0.24920991	-0.87410223	0.7253219	0.8600835	1	3670	tags=38%, list=20%, signal=48%
NIKOLSKY_BREAST_CANCER_11Q12_Q14_AMPLICON	NIKOLSKY_BREAST_CANCER_11Q12_Q14_AMPLICON		121	-0.19842486	-0.8741	0.87	0.85952854	1	2343	tags=19%, list=13%, signal=22%
SESTO_RESPONSE_TO_UV_C5	SESTO_RESPONSE_TO_UV_C5		45	-0.23632176	-0.87305796	0.74019605	0.8614226	1	4355	tags=31%, list=24%, signal=41%
KEGG_ALANINE_ASPARTATE_AND_GLUTAMATE_METABOLISM	KEGG_ALANINE_ASPARTATE_AND_GLUTAMATE_METABOLISM		27	-0.26709634	-0.87257993	0.6745283	0.86199474	1	2212	tags=22%, list=12%, signal=25%
KEGG_RIG_I_LIKE_RECEPTOR_SIGNALING_PATHWAY	KEGG_RIG_I_LIKE_RECEPTOR_SIGNALING_PATHWAY		51	-0.2285808	-0.87219554	0.73626375	0.86232394	1	4365	tags=39%, list=24%, signal=52%
ST_MYOCYTE_AD_PATHWAY	ST_MYOCYTE_AD_PATHWAY		20	-0.28349918	-0.87211263	0.67509025	0.86193234	1	464	tags=10%, list=3%, signal=10%
DAVICIONI_MOLECULAR_ARMS_VS_ERMS_DN	DAVICIONI_MOLECULAR_ARMS_VS_ERMS_DN		165	-0.18568185	-0.87104523	0.9423077	0.8638631	1	3127	tags=27%, list=17%, signal=32%
KEGG_STEROID_BIOSYNTHESIS	KEGG_STEROID_BIOSYNTHESIS		15	-0.30568483	-0.8708856	0.6319218	0.863682	1	4071	tags=47%, list=23%, signal=60%
LI_DCP2_BOUND_MRNA	LI_DCP2_BOUND_MRNA		87	-0.21250449	-0.87088096	0.83739835	0.86313546	1	5418	tags=45%, list=30%, signal=64%
KYNG_ENVIRONMENTAL_STRESS_RESPONSE_NOT_BY_UV_IN_OLD	KYNG_ENVIRONMENTAL_STRESS_RESPONSE_NOT_BY_UV_IN_OLD		23	-0.27749783	-0.8701528	0.6488889	0.8642748	1	2149	tags=22%, list=12%, signal=25%
KEGG_PHOSPHATIDYLINOSITOL_SIGNALING_SYSTEM	KEGG_PHOSPHATIDYLINOSITOL_SIGNALING_SYSTEM		68	-0.21549863	-0.86996514	0.7657658	0.864097	1	3408	tags=31%, list=19%, signal=38%
VANHARANTA_UTERINE_FIBROID_WITH_7Q_DELETION_UP	VANHARANTA_UTERINE_FIBROID_WITH_7Q_DELETION_UP		65	-0.2208284	-0.86949444	0.7625	0.8646703	1	3588	tags=31%, list=20%, signal=38%
GOBERT_CORE_OLIGODENDROCYTE_DIFFERENTIATION	GOBERT_CORE_OLIGODENDROCYTE_DIFFERENTIATION		35	-0.24661615	-0.86893296	0.7074468	0.8653575	1	3468	tags=40%, list=19%, signal=49%
REACTOME_FORMATION_OF_RNA_POL_II_ELONGATION_COMPLEX_	REACTOME_FORMATION_OF_RNA_POL_II_ELONGATION_COMPLEX_		38	-0.24418023	-0.8666738	0.7409091	0.86987644	1	13643	tags=100%, list=76%, signal=410%
BOCHKIS_FOXA2_TARGETS	BOCHKIS_FOXA2_TARGETS		341	-0.17213541	-0.8666502	0.9166667	0.869356	1	2947	tags=21%, list=16%, signal=25%
CAFFAREL_RESPONSE_TO_THC_24HR_5_DN	CAFFAREL_RESPONSE_TO_THC_24HR_5_DN		55	-0.2239184	-0.86600405	0.73417723	0.8701704	1	3481	tags=31%, list=19%, signal=38%
KORKOLA_CORRELATED_WITH_POU5F1	KORKOLA_CORRELATED_WITH_POU5F1		21	-0.27980354	-0.8658392	0.6704981	0.87000585	1	966	tags=19%, list=5%, signal=20%
EBAUER_TARGETS_OF_PAX3_FOXO1_FUSION_DN	EBAUER_TARGETS_OF_PAX3_FOXO1_FUSION_DN		42	-0.23247313	-0.8657173	0.7113402	0.8697258	1	3119	tags=26%, list=17%, signal=32%
DAZARD_UV_RESPONSE_CLUSTER_G1	DAZARD_UV_RESPONSE_CLUSTER_G1		54	-0.22895494	-0.86494154	0.7443182	0.8708516	1	2810	tags=20%, list=16%, signal=24%
REACTOME_ACTIVATION_OF_BH3_ONLY_PROTEINS	REACTOME_ACTIVATION_OF_BH3_ONLY_PROTEINS		16	-0.29585883	-0.8641281	0.6225681	0.87209785	1	5145	tags=50%, list=29%, signal=70%
MARIADASON_RESPONSE_TO_CURCUMIN_SULINDAC_7	MARIADASON_RESPONSE_TO_CURCUMIN_SULINDAC_7		15	-0.30962157	-0.8637289	0.662963	0.87247485	1	12458	tags=100%, list=69%, signal=323%
PECE_MAMMARY_STEM_CELL_UP	PECE_MAMMARY_STEM_CELL_UP		130	-0.19408126	-0.86333936	0.8452381	0.8727721	1	1695	tags=10%, list=9%, signal=11%
REACTOME_MRNA_3_END_PROCESSING	REACTOME_MRNA_3_END_PROCESSING		33	-0.24907601	-0.8630479	0.7352941	0.872915	1	4779	tags=48%, list=26%, signal=66%
MCCLUNG_COCAIN_REWARD_4WK	MCCLUNG_COCAIN_REWARD_4WK		58	-0.22425821	-0.8627332	0.7877095	0.8730998	1	1933	tags=14%, list=11%, signal=15%
COLDREN_GEFITINIB_RESISTANCE_UP	COLDREN_GEFITINIB_RESISTANCE_UP		77	-0.20819993	-0.86164886	0.78688526	0.8750499	1	3381	tags=27%, list=19%, signal=33%
LA_MEN1_TARGETS	LA_MEN1_TARGETS		20	-0.2808293	-0.8613436	0.66917294	0.87515056	1	2638	tags=30%, list=15%, signal=35%
REACTOME_JNK_C_JUN_KINASES_PHOSPHORYLATION_AND_ACTIVATION_MEDIATED_BY_ACTIVATED_HUMAN_TAK1	REACTOME_JNK_C_JUN_KINASES_PHOSPHORYLATION_AND_ACTIVATION_MEDIATED_BY_ACTIVATED_HUMAN_TAK1		16	-0.2954418	-0.8612903	0.6812081	0.87472075	1	3877	tags=38%, list=21%, signal=48%
STEIN_ESRRA_TARGETS_DN	STEIN_ESRRA_TARGETS_DN		99	-0.20545034	-0.8608431	0.8305085	0.87512064	1	681	tags=8%, list=4%, signal=8%
CHEOK_RESPONSE_TO_MERCAPTOPURINE_DN	CHEOK_RESPONSE_TO_MERCAPTOPURINE_DN		16	-0.29798168	-0.86026776	0.68551236	0.8758691	1	1340	tags=19%, list=7%, signal=20%
HOEGERKORP_CD44_TARGETS_TEMPORAL_DN	HOEGERKORP_CD44_TARGETS_TEMPORAL_DN		21	-0.27305374	-0.85983044	0.6820084	0.87625784	1	1108	tags=14%, list=6%, signal=15%
MOREAUX_MULTIPLE_MYELOMA_BY_TACI_DN	MOREAUX_MULTIPLE_MYELOMA_BY_TACI_DN		164	-0.18945117	-0.8597568	0.8888889	0.87587667	1	3944	tags=24%, list=22%, signal=30%
REACTOME_FORMATION_OF_THE_TERNARY_COMPLEX_AND_SUBSEQUENTLY_THE_43S_COMPLEX	REACTOME_FORMATION_OF_THE_TERNARY_COMPLEX_AND_SUBSEQUENTLY_THE_43S_COMPLEX		47	-0.22605446	-0.85804015	0.7457627	0.87906647	1	10938	tags=96%, list=61%, signal=243%
KEGG_TGF_BETA_SIGNALING_PATHWAY	KEGG_TGF_BETA_SIGNALING_PATHWAY		73	-0.20821172	-0.8568122	0.7723577	0.88127255	1	1597	tags=14%, list=9%, signal=15%
LOPES_METHYLATED_IN_COLON_CANCER_DN	LOPES_METHYLATED_IN_COLON_CANCER_DN		24	-0.26918107	-0.8563688	0.69863015	0.8816928	1	2782	tags=33%, list=15%, signal=39%
KEGG_BASAL_TRANSCRIPTION_FACTORS	KEGG_BASAL_TRANSCRIPTION_FACTORS		33	-0.24668668	-0.85635704	0.70776254	0.8811655	1	3335	tags=21%, list=18%, signal=26%
MUELLER_METHYLATED_IN_GLIOBLASTOMA	MUELLER_METHYLATED_IN_GLIOBLASTOMA		20	-0.2806912	-0.85169923	0.71272725	0.890784	1	2316	tags=35%, list=13%, signal=40%
PID_HDAC_CLASSIII_PATHWAY	PID_HDAC_CLASSIII_PATHWAY		23	-0.2659141	-0.85136116	0.7186147	0.8910075	1	2840	tags=30%, list=16%, signal=36%
REACTOME_METABOLISM_OF_RNA	REACTOME_METABOLISM_OF_RNA		251	-0.17571628	-0.8512716	1	0.8906479	1	5323	tags=37%, list=30%, signal=51%
LIN_NPAS4_TARGETS_DN	LIN_NPAS4_TARGETS_DN		51	-0.21844083	-0.85077757	0.78531075	0.89110625	1	1249	tags=12%, list=7%, signal=13%
REACTOME_ELONGATION_ARREST_AND_RECOVERY	REACTOME_ELONGATION_ARREST_AND_RECOVERY		27	-0.25469184	-0.8505807	0.7366255	0.89096326	1	13451	tags=100%, list=75%, signal=393%
BIOCARTA_IL1R_PATHWAY	BIOCARTA_IL1R_PATHWAY		29	-0.2540276	-0.8489254	0.7399103	0.89394665	1	3877	tags=38%, list=21%, signal=48%
KEGG_PARKINSONS_DISEASE	KEGG_PARKINSONS_DISEASE		107	-0.19431946	-0.8485621	0.83653843	0.8940871	1	549	tags=4%, list=3%, signal=4%
HSIAO_HOUSEKEEPING_GENES	HSIAO_HOUSEKEEPING_GENES		377	-0.1742716	-0.8485162	1	0.8936317	1	4433	tags=27%, list=25%, signal=35%
SCHLOSSER_MYC_AND_SERUM_RESPONSE_SYNERGY	SCHLOSSER_MYC_AND_SERUM_RESPONSE_SYNERGY		32	-0.24715357	-0.84796065	0.74222225	0.89418995	1	13588	tags=100%, list=75%, signal=405%
MULLIGHAN_MLL_SIGNATURE_2_UP	MULLIGHAN_MLL_SIGNATURE_2_UP		348	-0.17242117	-0.84773403	0.9230769	0.8941699	1	2303	tags=16%, list=13%, signal=17%
REACTOME_POST_NMDA_RECEPTOR_ACTIVATION_EVENTS	REACTOME_POST_NMDA_RECEPTOR_ACTIVATION_EVENTS		29	-0.25607494	-0.8476963	0.74449337	0.8937042	1	2125	tags=24%, list=12%, signal=27%
KEGG_LEISHMANIA_INFECTION	KEGG_LEISHMANIA_INFECTION		47	-0.2276299	-0.8475873	0.74860334	0.8933839	1	2902	tags=26%, list=16%, signal=30%
SCHAEFFER_PROSTATE_DEVELOPMENT_AND_CANCER_BOX4_DN	SCHAEFFER_PROSTATE_DEVELOPMENT_AND_CANCER_BOX4_DN		32	-0.24197021	-0.84735733	0.7044335	0.89331955	1	4218	tags=38%, list=23%, signal=49%
REACTOME_ACTIVATED_TAK1_MEDIATES_P38_MAPK_ACTIVATION	REACTOME_ACTIVATED_TAK1_MEDIATES_P38_MAPK_ACTIVATION		17	-0.28990167	-0.84640366	0.65555555	0.8947467	1	3968	tags=47%, list=22%, signal=60%
REACTOME_INTRINSIC_PATHWAY_FOR_APOPTOSIS	REACTOME_INTRINSIC_PATHWAY_FOR_APOPTOSIS		28	-0.25922483	-0.8461665	0.706383	0.8946737	1	2840	tags=25%, list=16%, signal=30%
OUELLET_CULTURED_OVARIAN_CANCER_INVASIVE_VS_LMP_DN	OUELLET_CULTURED_OVARIAN_CANCER_INVASIVE_VS_LMP_DN		21	-0.26637703	-0.8459655	0.703125	0.8945001	1	707	tags=10%, list=4%, signal=10%
TONG_INTERACT_WITH_PTTG1	TONG_INTERACT_WITH_PTTG1		56	-0.21541059	-0.84458584	0.84302324	0.8969157	1	2201	tags=18%, list=12%, signal=20%
ST_ADRENERGIC	ST_ADRENERGIC		28	-0.25047216	-0.84438837	0.69827586	0.89674157	1	3631	tags=29%, list=20%, signal=36%
LEE_CALORIE_RESTRICTION_NEOCORTEX_UP	LEE_CALORIE_RESTRICTION_NEOCORTEX_UP		67	-0.20463061	-0.84413695	0.84713376	0.8967069	1	1929	tags=15%, list=11%, signal=17%
REACTOME_GLUCOSE_METABOLISM	REACTOME_GLUCOSE_METABOLISM		57	-0.21566269	-0.8414368	0.79518074	0.90172774	1	2006	tags=18%, list=11%, signal=20%
YAO_TEMPORAL_RESPONSE_TO_PROGESTERONE_CLUSTER_16	YAO_TEMPORAL_RESPONSE_TO_PROGESTERONE_CLUSTER_16		70	-0.21207969	-0.84122753	0.8518519	0.901555	1	2786	tags=26%, list=15%, signal=30%
SHEPARD_BMYB_MORPHOLINO_UP	SHEPARD_BMYB_MORPHOLINO_UP		178	-0.1749778	-0.8391396	0.95348835	0.9052269	1	3244	tags=24%, list=18%, signal=28%
PID_RET_PATHWAY	PID_RET_PATHWAY		38	-0.23179291	-0.83902526	0.7989418	0.90493	1	550	tags=8%, list=3%, signal=8%
FONTAINE_THYROID_TUMOR_UNCERTAIN_MALIGNANCY_UP	FONTAINE_THYROID_TUMOR_UNCERTAIN_MALIGNANCY_UP		28	-0.24886183	-0.8388427	0.7616823	0.90472126	1	3323	tags=32%, list=18%, signal=39%
ZHENG_IL22_SIGNALING_DN	ZHENG_IL22_SIGNALING_DN		32	-0.24561714	-0.83865774	0.7430168	0.9045463	1	1312	tags=13%, list=7%, signal=13%
LUI_THYROID_CANCER_CLUSTER_3	LUI_THYROID_CANCER_CLUSTER_3		27	-0.2602443	-0.8386061	0.7162791	0.90409356	1	13351	tags=100%, list=74%, signal=384%
TONKS_TARGETS_OF_RUNX1_RUNX1T1_FUSION_MONOCYTE_DN	TONKS_TARGETS_OF_RUNX1_RUNX1T1_FUSION_MONOCYTE_DN		36	-0.24318051	-0.83844924	0.7874396	0.9038683	1	2457	tags=33%, list=14%, signal=39%
DAIRKEE_TERT_TARGETS_UP	DAIRKEE_TERT_TARGETS_UP		339	-0.15910812	-0.83805764	1	0.9041134	1	3120	tags=17%, list=17%, signal=20%
SMID_BREAST_CANCER_RELAPSE_IN_BRAIN_DN	SMID_BREAST_CANCER_RELAPSE_IN_BRAIN_DN		69	-0.20917943	-0.8375215	0.82738096	0.9045548	1	1913	tags=20%, list=11%, signal=23%
RIZ_ERYTHROID_DIFFERENTIATION_12HR	RIZ_ERYTHROID_DIFFERENTIATION_12HR		34	-0.24249592	-0.8372019	0.71493214	0.90469825	1	2295	tags=21%, list=13%, signal=24%
VANTVEER_BREAST_CANCER_BRCA1_UP	VANTVEER_BREAST_CANCER_BRCA1_UP		30	-0.24371246	-0.83704126	0.75233644	0.9044473	1	3085	tags=27%, list=17%, signal=32%
WOOD_EBV_EBNA1_TARGETS_UP	WOOD_EBV_EBNA1_TARGETS_UP		105	-0.19344312	-0.8370372	0.85046726	0.9038912	1	1866	tags=12%, list=10%, signal=14%
BIOCARTA_TNFR1_PATHWAY	BIOCARTA_TNFR1_PATHWAY		28	-0.25538188	-0.8366759	0.76754385	0.9040587	1	4429	tags=39%, list=25%, signal=52%
PID_EPO_PATHWAY	PID_EPO_PATHWAY		31	-0.24645527	-0.8362219	0.7963801	0.90438986	1	1763	tags=16%, list=10%, signal=18%
KEGG_VIRAL_MYOCARDITIS	KEGG_VIRAL_MYOCARDITIS		43	-0.23071223	-0.8359112	0.8135593	0.9044431	1	2136	tags=16%, list=12%, signal=18%
PROVENZANI_METASTASIS_UP	PROVENZANI_METASTASIS_UP		177	-0.18155946	-0.8353461	0.9622642	0.9050036	1	3469	tags=27%, list=19%, signal=33%
HUTTMANN_B_CLL_POOR_SURVIVAL_DN	HUTTMANN_B_CLL_POOR_SURVIVAL_DN		50	-0.22077046	-0.83505154	0.8131868	0.9049846	1	1231	tags=14%, list=7%, signal=15%
BIOCARTA_ARF_PATHWAY	BIOCARTA_ARF_PATHWAY		16	-0.29815215	-0.8350256	0.6970803	0.904485	1	12665	tags=100%, list=70%, signal=335%
PRAMOONJAGO_SOX4_TARGETS_DN	PRAMOONJAGO_SOX4_TARGETS_DN		50	-0.22596318	-0.8327448	0.7976879	0.9083861	1	3059	tags=24%, list=17%, signal=29%
LINDGREN_BLADDER_CANCER_CLUSTER_2A_DN	LINDGREN_BLADDER_CANCER_CLUSTER_2A_DN		125	-0.18553932	-0.8319363	0.9255319	0.90934986	1	2848	tags=22%, list=16%, signal=25%
LIANG_HEMATOPOIESIS_STEM_CELL_NUMBER_LARGE_VS_TINY_DN	LIANG_HEMATOPOIESIS_STEM_CELL_NUMBER_LARGE_VS_TINY_DN		39	-0.23544613	-0.8316993	0.79396987	0.90922767	1	4141	tags=36%, list=23%, signal=46%
BIOCARTA_MTOR_PATHWAY	BIOCARTA_MTOR_PATHWAY		23	-0.2603758	-0.8312817	0.7389558	0.9094731	1	3779	tags=30%, list=21%, signal=38%
NIKOLSKY_MUTATED_AND_AMPLIFIED_IN_BREAST_CANCER	NIKOLSKY_MUTATED_AND_AMPLIFIED_IN_BREAST_CANCER		76	-0.20283951	-0.8312778	0.88535035	0.90892535	1	536	tags=8%, list=3%, signal=8%
TIEN_INTESTINE_PROBIOTICS_6HR_UP	TIEN_INTESTINE_PROBIOTICS_6HR_UP		54	-0.21737184	-0.831209	0.8164557	0.908491	1	4096	tags=28%, list=23%, signal=36%
REACTOME_NEP_NS2_INTERACTS_WITH_THE_CELLULAR_EXPORT_MACHINERY	REACTOME_NEP_NS2_INTERACTS_WITH_THE_CELLULAR_EXPORT_MACHINERY		27	-0.2563177	-0.8302358	0.7583333	0.90984416	1	3587	tags=33%, list=20%, signal=42%
GARY_CD5_TARGETS_UP	GARY_CD5_TARGETS_UP		432	-0.16121703	-0.8301344	1	0.9094557	1	2859	tags=19%, list=16%, signal=22%
REACTOME_DESTABILIZATION_OF_MRNA_BY_KSRP	REACTOME_DESTABILIZATION_OF_MRNA_BY_KSRP		17	-0.2818287	-0.8299824	0.699187	0.9091599	1	5323	tags=65%, list=30%, signal=92%
BROWNE_HCMV_INFECTION_12HR_UP	BROWNE_HCMV_INFECTION_12HR_UP		97	-0.18929024	-0.82974607	0.9266055	0.90907127	1	1040	tags=8%, list=6%, signal=9%
AIYAR_COBRA1_TARGETS_UP	AIYAR_COBRA1_TARGETS_UP		29	-0.249033	-0.82767045	0.7457627	0.9124287	1	2597	tags=28%, list=14%, signal=32%
XU_HGF_TARGETS_INDUCED_BY_AKT1_6HR	XU_HGF_TARGETS_INDUCED_BY_AKT1_6HR		18	-0.28018415	-0.82661945	0.700361	0.9138748	1	2897	tags=44%, list=16%, signal=53%
YAGI_AML_SURVIVAL	YAGI_AML_SURVIVAL		113	-0.18800457	-0.8263111	0.88297874	0.91388285	1	2805	tags=18%, list=16%, signal=21%
ACEVEDO_NORMAL_TISSUE_ADJACENT_TO_LIVER_TUMOR_UP	ACEVEDO_NORMAL_TISSUE_ADJACENT_TO_LIVER_TUMOR_UP		141	-0.17826676	-0.8233611	0.94736844	0.91864944	1	2925	tags=21%, list=16%, signal=25%
REACTOME_DIABETES_PATHWAYS	REACTOME_DIABETES_PATHWAYS		116	-0.18515521	-0.82246906	0.9101124	0.919656	1	2664	tags=22%, list=15%, signal=25%
VALK_AML_CLUSTER_6	VALK_AML_CLUSTER_6		25	-0.25069806	-0.8219839	0.773913	0.9199705	1	1245	tags=16%, list=7%, signal=17%
BIOCARTA_HIVNEF_PATHWAY	BIOCARTA_HIVNEF_PATHWAY		56	-0.2113898	-0.8218167	0.8248588	0.91970956	1	2617	tags=21%, list=15%, signal=25%
REACTOME_REGULATION_OF_GLUCOKINASE_BY_GLUCOKINASE_REGULATORY_PROTEIN	REACTOME_REGULATION_OF_GLUCOKINASE_BY_GLUCOKINASE_REGULATORY_PROTEIN		26	-0.25088108	-0.82082254	0.7805907	0.92113376	1	3587	tags=35%, list=20%, signal=43%
ACOSTA_PROLIFERATION_INDEPENDENT_MYC_TARGETS_UP	ACOSTA_PROLIFERATION_INDEPENDENT_MYC_TARGETS_UP		74	-0.20204206	-0.820708	0.8439716	0.9207893	1	2756	tags=22%, list=15%, signal=25%
LINDGREN_BLADDER_CANCER_WITH_LOH_IN_CHR9Q	LINDGREN_BLADDER_CANCER_WITH_LOH_IN_CHR9Q		108	-0.18705967	-0.8202373	0.9404762	0.9211321	1	2416	tags=17%, list=13%, signal=19%
NIELSEN_MALIGNAT_FIBROUS_HISTIOCYTOMA_DN	NIELSEN_MALIGNAT_FIBROUS_HISTIOCYTOMA_DN		17	-0.274502	-0.8191525	0.74358976	0.92257935	1	2833	tags=29%, list=16%, signal=35%
REACTOME_TRANSPORT_OF_RIBONUCLEOPROTEINS_INTO_THE_HOST_NUCLEUS	REACTOME_TRANSPORT_OF_RIBONUCLEOPROTEINS_INTO_THE_HOST_NUCLEUS		27	-0.24247387	-0.8187156	0.7522523	0.922824	1	3587	tags=33%, list=20%, signal=42%
KYNG_WERNER_SYNDROM_AND_NORMAL_AGING_DN	KYNG_WERNER_SYNDROM_AND_NORMAL_AGING_DN		195	-0.17290995	-0.8179352	0.9782609	0.9236911	1	4431	tags=34%, list=25%, signal=44%
REACTOME_MRNA_CAPPING	REACTOME_MRNA_CAPPING		28	-0.24404465	-0.8169573	0.78318584	0.9248325	1	13643	tags=100%, list=76%, signal=410%
KRASNOSELSKAYA_ILF3_TARGETS_DN	KRASNOSELSKAYA_ILF3_TARGETS_DN		44	-0.22652249	-0.8167403	0.875	0.9246888	1	3190	tags=34%, list=18%, signal=41%
REACTOME_NGF_SIGNALLING_VIA_TRKA_FROM_THE_PLASMA_MEMBRANE	REACTOME_NGF_SIGNALLING_VIA_TRKA_FROM_THE_PLASMA_MEMBRANE		125	-0.1816355	-0.81662303	0.942029	0.9243607	1	3132	tags=22%, list=17%, signal=26%
SIG_BCR_SIGNALING_PATHWAY	SIG_BCR_SIGNALING_PATHWAY		39	-0.22054921	-0.8165546	0.82474226	0.92392296	1	3698	tags=31%, list=21%, signal=39%
EHLERS_ANEUPLOIDY_UP	EHLERS_ANEUPLOIDY_UP		40	-0.22328468	-0.8160776	0.7938144	0.924228	1	1366	tags=13%, list=8%, signal=13%
BIOCARTA_EIF_PATHWAY	BIOCARTA_EIF_PATHWAY		16	-0.28405747	-0.8155832	0.75088966	0.9245502	1	12919	tags=100%, list=72%, signal=352%
KIM_MYC_AMPLIFICATION_TARGETS_UP	KIM_MYC_AMPLIFICATION_TARGETS_UP		182	-0.17184415	-0.8143217	0.95555556	0.9262911	1	3230	tags=23%, list=18%, signal=27%
KEGG_GLYCEROLIPID_METABOLISM	KEGG_GLYCEROLIPID_METABOLISM		40	-0.22642833	-0.81402194	0.8196721	0.92627084	1	3075	tags=28%, list=17%, signal=33%
FLECHNER_BIOPSY_KIDNEY_TRANSPLANT_OK_VS_DONOR_DN	FLECHNER_BIOPSY_KIDNEY_TRANSPLANT_OK_VS_DONOR_DN		22	-0.2552789	-0.8110825	0.7765568	0.93073916	1	1385	tags=14%, list=8%, signal=15%
HILLION_HMGA1_TARGETS	HILLION_HMGA1_TARGETS		72	-0.19967738	-0.8101447	0.9153846	0.93179744	1	3637	tags=25%, list=20%, signal=31%
REACTOME_ENOS_ACTIVATION_AND_REGULATION	REACTOME_ENOS_ACTIVATION_AND_REGULATION		18	-0.26881555	-0.80962056	0.73741007	0.9321556	1	3857	tags=39%, list=21%, signal=49%
REACTOME_ACTIVATION_OF_CHAPERONE_GENES_BY_XBP1S	REACTOME_ACTIVATION_OF_CHAPERONE_GENES_BY_XBP1S		45	-0.21793237	-0.8082657	0.86153847	0.93388003	1	2441	tags=20%, list=14%, signal=23%
REACTOME_INSULIN_RECEPTOR_SIGNALLING_CASCADE	REACTOME_INSULIN_RECEPTOR_SIGNALLING_CASCADE		72	-0.19991352	-0.8079771	0.9347826	0.9337823	1	3012	tags=22%, list=17%, signal=27%
PURBEY_TARGETS_OF_CTBP1_AND_SATB1_UP	PURBEY_TARGETS_OF_CTBP1_AND_SATB1_UP		74	-0.199002	-0.8076857	0.87234044	0.93372923	1	4158	tags=36%, list=23%, signal=47%
KAMMINGA_SENESCENCE	KAMMINGA_SENESCENCE		36	-0.23019882	-0.8071299	0.8181818	0.9340922	1	898	tags=11%, list=5%, signal=12%
KEGG_ACUTE_MYELOID_LEUKEMIA	KEGG_ACUTE_MYELOID_LEUKEMIA		52	-0.21253432	-0.80441225	0.85164833	0.937957	1	3802	tags=31%, list=21%, signal=39%
PHONG_TNF_RESPONSE_VIA_P38_COMPLETE	PHONG_TNF_RESPONSE_VIA_P38_COMPLETE		216	-0.17082088	-0.804033	0.969697	0.9380192	1	3981	tags=34%, list=22%, signal=43%
CHANGOLKAR_H2AFY_TARGETS_UP	CHANGOLKAR_H2AFY_TARGETS_UP		42	-0.21752216	-0.8034872	0.8804348	0.9383442	1	2572	tags=19%, list=14%, signal=22%
HU_GENOTOXIN_ACTION_DIRECT_VS_INDIRECT_4HR	HU_GENOTOXIN_ACTION_DIRECT_VS_INDIRECT_4HR		29	-0.23318426	-0.80301493	0.7762557	0.938526	1	579	tags=7%, list=3%, signal=7%
REACTOME_FORMATION_OF_THE_HIV1_EARLY_ELONGATION_COMPLEX	REACTOME_FORMATION_OF_THE_HIV1_EARLY_ELONGATION_COMPLEX		28	-0.24404465	-0.8029908	0.8032787	0.9379905	1	13643	tags=100%, list=76%, signal=410%
GAZDA_DIAMOND_BLACKFAN_ANEMIA_ERYTHROID_UP	GAZDA_DIAMOND_BLACKFAN_ANEMIA_ERYTHROID_UP		23	-0.2605805	-0.80269593	0.77732795	0.93795556	1	2904	tags=26%, list=16%, signal=31%
WANG_IMMORTALIZED_BY_HOXA9_AND_MEIS1_DN	WANG_IMMORTALIZED_BY_HOXA9_AND_MEIS1_DN		19	-0.26530805	-0.8022407	0.76984125	0.9381666	1	893	tags=16%, list=5%, signal=17%
YOSHIOKA_LIVER_CANCER_EARLY_RECURRENCE_DN	YOSHIOKA_LIVER_CANCER_EARLY_RECURRENCE_DN		45	-0.2157	-0.79959494	0.88601035	0.942135	1	933	tags=9%, list=5%, signal=9%
WANG_ESOPHAGUS_CANCER_VS_NORMAL_DN	WANG_ESOPHAGUS_CANCER_VS_NORMAL_DN		90	-0.18772477	-0.79908633	0.95652175	0.94241637	1	2287	tags=17%, list=13%, signal=19%
REACTOME_RNA_POL_III_TRANSCRIPTION_TERMINATION	REACTOME_RNA_POL_III_TRANSCRIPTION_TERMINATION		19	-0.26495263	-0.79735905	0.7528517	0.94477636	1	1984	tags=16%, list=11%, signal=18%
WANG_CLIM2_TARGETS_DN	WANG_CLIM2_TARGETS_DN		175	-0.17066701	-0.79495674	0.9807692	0.9481295	1	3795	tags=25%, list=21%, signal=32%
STEIN_ESRRA_TARGETS	STEIN_ESRRA_TARGETS		487	-0.14574905	-0.79490983	1	0.947648	1	2943	tags=17%, list=16%, signal=20%
REACTOME_TRAF6_MEDIATED_IRF7_ACTIVATION	REACTOME_TRAF6_MEDIATED_IRF7_ACTIVATION		16	-0.26892856	-0.79479307	0.77011496	0.94728327	1	4572	tags=56%, list=25%, signal=75%
AMIT_SERUM_RESPONSE_480_MCF10A	AMIT_SERUM_RESPONSE_480_MCF10A		27	-0.2423952	-0.7930291	0.81782943	0.9493829	1	2352	tags=19%, list=13%, signal=21%
ALONSO_METASTASIS_NEURAL_UP	ALONSO_METASTASIS_NEURAL_UP		16	-0.28388807	-0.7929063	0.7757353	0.94898355	1	3225	tags=31%, list=18%, signal=38%
LEE_AGING_MUSCLE_UP	LEE_AGING_MUSCLE_UP		37	-0.22318259	-0.7913428	0.84577113	0.95095295	1	3752	tags=35%, list=21%, signal=44%
REACTOME_SMOOTH_MUSCLE_CONTRACTION	REACTOME_SMOOTH_MUSCLE_CONTRACTION		22	-0.2545246	-0.7908092	0.8055556	0.95122755	1	3857	tags=32%, list=21%, signal=40%
BACOLOD_RESISTANCE_TO_ALKYLATING_AGENTS_DN	BACOLOD_RESISTANCE_TO_ALKYLATING_AGENTS_DN		54	-0.20270602	-0.79038864	0.8956044	0.95128876	1	3440	tags=26%, list=19%, signal=32%
REACTOME_PTM_GAMMA_CARBOXYLATION_HYPUSINE_FORMATION_AND_ARYLSULFATASE_ACTIVATION	REACTOME_PTM_GAMMA_CARBOXYLATION_HYPUSINE_FORMATION_AND_ARYLSULFATASE_ACTIVATION		18	-0.2656073	-0.78905225	0.7670251	0.9527574	1	2485	tags=22%, list=14%, signal=26%
NIELSEN_LEIOMYOSARCOMA_CNN1_UP	NIELSEN_LEIOMYOSARCOMA_CNN1_UP		16	-0.27549556	-0.788778	0.7647059	0.9525955	1	1276	tags=19%, list=7%, signal=20%
MOOTHA_GLYCOLYSIS	MOOTHA_GLYCOLYSIS		17	-0.27257413	-0.78781676	0.78647685	0.95355004	1	2855	tags=35%, list=16%, signal=42%
REACTOME_NUCLEOTIDE_BINDING_DOMAIN_LEUCINE_RICH_REPEAT_CONTAINING_RECEPTOR_NLR_SIGNALING_PATHWAYS	REACTOME_NUCLEOTIDE_BINDING_DOMAIN_LEUCINE_RICH_REPEAT_CONTAINING_RECEPTOR_NLR_SIGNALING_PATHWAYS		39	-0.22253975	-0.7877304	0.8578947	0.95313096	1	3535	tags=33%, list=20%, signal=41%
STARK_PREFRONTAL_CORTEX_22Q11_DELETION_DN	STARK_PREFRONTAL_CORTEX_22Q11_DELETION_DN		474	-0.15331015	-0.7872103	1	0.9533563	1	3946	tags=25%, list=22%, signal=31%
MONNIER_POSTRADIATION_TUMOR_ESCAPE_UP	MONNIER_POSTRADIATION_TUMOR_ESCAPE_UP		366	-0.1555881	-0.7856984	1	0.9550926	1	2882	tags=16%, list=16%, signal=19%
REACTOME_DEADENYLATION_OF_MRNA	REACTOME_DEADENYLATION_OF_MRNA		18	-0.2600772	-0.7851333	0.8022388	0.9553696	1	4130	tags=39%, list=23%, signal=50%
PID_CDC42_PATHWAY	PID_CDC42_PATHWAY		66	-0.20134148	-0.78501576	0.9054054	0.95498234	1	3818	tags=29%, list=21%, signal=36%
ACEVEDO_NORMAL_TISSUE_ADJACENT_TO_LIVER_TUMOR_DN	ACEVEDO_NORMAL_TISSUE_ADJACENT_TO_LIVER_TUMOR_DN		313	-0.15863162	-0.7846145	1	0.9550768	1	2429	tags=14%, list=13%, signal=16%
BIOCARTA_ETS_PATHWAY	BIOCARTA_ETS_PATHWAY		18	-0.26681885	-0.7835483	0.74910396	0.9561367	1	4227	tags=39%, list=23%, signal=51%
BIOCARTA_CALCINEURIN_PATHWAY	BIOCARTA_CALCINEURIN_PATHWAY		18	-0.26589164	-0.78232443	0.81881535	0.9574706	1	2006	tags=22%, list=11%, signal=25%
DAVIES_MULTIPLE_MYELOMA_VS_MGUS_DN	DAVIES_MULTIPLE_MYELOMA_VS_MGUS_DN		21	-0.24750881	-0.7820459	0.84232366	0.9573211	1	44	tags=5%, list=0%, signal=5%
ALONSO_METASTASIS_DN	ALONSO_METASTASIS_DN		19	-0.2578411	-0.7800287	0.78884465	0.9595934	1	1562	tags=21%, list=9%, signal=23%
REACTOME_RECYCLING_PATHWAY_OF_L1	REACTOME_RECYCLING_PATHWAY_OF_L1		26	-0.23779596	-0.7785751	0.8523207	0.9610067	1	4686	tags=42%, list=26%, signal=57%
LUI_THYROID_CANCER_PAX8_PPARG_DN	LUI_THYROID_CANCER_PAX8_PPARG_DN		43	-0.21245971	-0.77718365	0.8706468	0.96237427	1	14215	tags=100%, list=79%, signal=471%
KAYO_CALORIE_RESTRICTION_MUSCLE_DN	KAYO_CALORIE_RESTRICTION_MUSCLE_DN		71	-0.18969466	-0.7771434	0.9183673	0.96187204	1	3262	tags=20%, list=18%, signal=24%
BIOCARTA_CHEMICAL_PATHWAY	BIOCARTA_CHEMICAL_PATHWAY		22	-0.25346175	-0.7758203	0.79607844	0.96324	1	4819	tags=45%, list=27%, signal=62%
REACTOME_BOTULINUM_NEUROTOXICITY	REACTOME_BOTULINUM_NEUROTOXICITY		17	-0.27384013	-0.775813	0.7728938	0.9626734	1	1778	tags=18%, list=10%, signal=20%
PID_RB_1PATHWAY	PID_RB_1PATHWAY		56	-0.20320626	-0.775057	0.9057971	0.9631756	1	4103	tags=39%, list=23%, signal=51%
REACTOME_TAK1_ACTIVATES_NFKB_BY_PHOSPHORYLATION_AND_ACTIVATION_OF_IKKS_COMPLEX	REACTOME_TAK1_ACTIVATES_NFKB_BY_PHOSPHORYLATION_AND_ACTIVATION_OF_IKKS_COMPLEX		21	-0.2451741	-0.7742981	0.8097015	0.9636761	1	2198	tags=19%, list=12%, signal=22%
PID_AR_TF_PATHWAY	PID_AR_TF_PATHWAY		45	-0.20502235	-0.7741084	0.87765956	0.9633669	1	1857	tags=13%, list=10%, signal=15%
REACTOME_TRANSLATION	REACTOME_TRANSLATION		142	-0.17022826	-0.7733925	1	0.9638946	1	10938	tags=92%, list=61%, signal=233%
PID_ENDOTHELIN_PATHWAY	PID_ENDOTHELIN_PATHWAY		55	-0.19762321	-0.7727734	0.90643275	0.96408796	1	1912	tags=13%, list=11%, signal=14%
GINESTIER_BREAST_CANCER_20Q13_AMPLIFICATION_DN	GINESTIER_BREAST_CANCER_20Q13_AMPLIFICATION_DN		154	-0.17144303	-0.7715082	1	0.96520895	1	3709	tags=25%, list=21%, signal=31%
CHESLER_BRAIN_HIGHEST_GENETIC_VARIANCE	CHESLER_BRAIN_HIGHEST_GENETIC_VARIANCE		29	-0.22764443	-0.77109164	0.8516746	0.965173	1	1387	tags=17%, list=8%, signal=19%
PID_HNF3B_PATHWAY	PID_HNF3B_PATHWAY		26	-0.23317133	-0.7710154	0.825	0.96472573	1	2849	tags=23%, list=16%, signal=27%
REACTOME_ABORTIVE_ELONGATION_OF_HIV1_TRANSCRIPT_IN_THE_ABSENCE_OF_TAT	REACTOME_ABORTIVE_ELONGATION_OF_HIV1_TRANSCRIPT_IN_THE_ABSENCE_OF_TAT		19	-0.25457874	-0.7705573	0.8097015	0.9648105	1	13451	tags=100%, list=75%, signal=393%
SANSOM_APC_TARGETS_REQUIRE_MYC	SANSOM_APC_TARGETS_REQUIRE_MYC		189	-0.16521221	-0.77033263	1	0.96452934	1	3673	tags=29%, list=20%, signal=36%
KEGG_VASOPRESSIN_REGULATED_WATER_REABSORPTION	KEGG_VASOPRESSIN_REGULATED_WATER_REABSORPTION		41	-0.21216781	-0.76997036	0.8994709	0.9644077	1	4228	tags=34%, list=23%, signal=44%
REACTOME_INSULIN_SYNTHESIS_AND_PROCESSING	REACTOME_INSULIN_SYNTHESIS_AND_PROCESSING		18	-0.25966904	-0.769872	0.7915058	0.9639802	1	2383	tags=22%, list=13%, signal=26%
REACTOME_SIGNALING_BY_THE_B_CELL_RECEPTOR_BCR	REACTOME_SIGNALING_BY_THE_B_CELL_RECEPTOR_BCR		112	-0.18096823	-0.76908123	0.9775281	0.9644883	1	4488	tags=35%, list=25%, signal=46%
ZHAN_MULTIPLE_MYELOMA_MS_DN	ZHAN_MULTIPLE_MYELOMA_MS_DN		42	-0.21184915	-0.76888216	0.8587571	0.96419686	1	1407	tags=14%, list=8%, signal=15%
HANSON_HRAS_SIGNALING_VIA_NFKB	HANSON_HRAS_SIGNALING_VIA_NFKB		19	-0.25819093	-0.76865435	0.80756015	0.96395135	1	2811	tags=32%, list=16%, signal=37%
JOHNSTONE_PARVB_TARGETS_2_UP	JOHNSTONE_PARVB_TARGETS_2_UP		130	-0.17211281	-0.7677779	0.9583333	0.9646127	1	1279	tags=9%, list=7%, signal=10%
CHANDRAN_METASTASIS_TOP50_DN	CHANDRAN_METASTASIS_TOP50_DN		44	-0.21257964	-0.7667877	0.89047617	0.9653457	1	2329	tags=20%, list=13%, signal=23%
NELSON_RESPONSE_TO_ANDROGEN_DN	NELSON_RESPONSE_TO_ANDROGEN_DN		17	-0.25954357	-0.7664369	0.8154982	0.96525145	1	104	tags=6%, list=1%, signal=6%
TIMOFEEVA_GROWTH_STRESS_VIA_STAT1_DN	TIMOFEEVA_GROWTH_STRESS_VIA_STAT1_DN		15	-0.2667939	-0.76593935	0.8181818	0.96531796	1	4300	tags=33%, list=24%, signal=44%
REACTOME_CREB_PHOSPHORYLATION_THROUGH_THE_ACTIVATION_OF_RAS	REACTOME_CREB_PHOSPHORYLATION_THROUGH_THE_ACTIVATION_OF_RAS		24	-0.23275357	-0.7650167	0.82730925	0.96587247	1	2125	tags=25%, list=12%, signal=28%
WANG_ADIPOGENIC_GENES_REPRESSED_BY_SIRT1	WANG_ADIPOGENIC_GENES_REPRESSED_BY_SIRT1		21	-0.24831285	-0.7649004	0.82520324	0.9654726	1	4730	tags=57%, list=26%, signal=77%
REACTOME_TRAF6_MEDIATED_NFKB_ACTIVATION	REACTOME_TRAF6_MEDIATED_NFKB_ACTIVATION		18	-0.263259	-0.7643095	0.7927273	0.9656721	1	3102	tags=28%, list=17%, signal=34%
PID_MAPK_TRK_PATHWAY	PID_MAPK_TRK_PATHWAY		32	-0.22515185	-0.764107	0.87906975	0.96539444	1	1496	tags=13%, list=8%, signal=14%
HEDENFALK_BREAST_CANCER_BRACX_UP	HEDENFALK_BREAST_CANCER_BRACX_UP		19	-0.25095552	-0.7632647	0.8191882	0.9658584	1	2582	tags=21%, list=14%, signal=25%
ZAMORA_NOS2_TARGETS_DN	ZAMORA_NOS2_TARGETS_DN		82	-0.183779	-0.76261127	0.9485294	0.9661292	1	3290	tags=22%, list=18%, signal=27%
REACTOME_DEADENYLATION_DEPENDENT_MRNA_DECAY	REACTOME_DEADENYLATION_DEPENDENT_MRNA_DECAY		43	-0.20394656	-0.7624855	0.885	0.9657375	1	4130	tags=35%, list=23%, signal=45%
PID_INSULIN_GLUCOSE_PATHWAY	PID_INSULIN_GLUCOSE_PATHWAY		22	-0.24393721	-0.76175284	0.8206107	0.96605945	1	4308	tags=32%, list=24%, signal=42%
KEGG_GNRH_SIGNALING_PATHWAY	KEGG_GNRH_SIGNALING_PATHWAY		80	-0.18296982	-0.7617434	0.9823009	0.9655117	1	4067	tags=36%, list=23%, signal=47%
FIRESTEIN_CTNNB1_PATHWAY	FIRESTEIN_CTNNB1_PATHWAY		31	-0.21972035	-0.7612511	0.89719623	0.9656028	1	1089	tags=13%, list=6%, signal=14%
REACTOME_SYNTHESIS_OF_PIPS_AT_THE_PLASMA_MEMBRANE	REACTOME_SYNTHESIS_OF_PIPS_AT_THE_PLASMA_MEMBRANE		26	-0.22908376	-0.76081425	0.8097166	0.9656184	1	987	tags=15%, list=5%, signal=16%
GUTIERREZ_MULTIPLE_MYELOMA_UP	GUTIERREZ_MULTIPLE_MYELOMA_UP		32	-0.22182927	-0.76042044	0.8717949	0.965527	1	4862	tags=38%, list=27%, signal=51%
BYSTRYKH_HEMATOPOIESIS_STEM_CELL_QTL_CIS	BYSTRYKH_HEMATOPOIESIS_STEM_CELL_QTL_CIS		101	-0.17554007	-0.76038414	0.99	0.9650218	1	3120	tags=21%, list=17%, signal=25%
PID_LYMPH_ANGIOGENESIS_PATHWAY	PID_LYMPH_ANGIOGENESIS_PATHWAY		25	-0.23349525	-0.75922763	0.8739496	0.96594137	1	4819	tags=52%, list=27%, signal=71%
BROWNE_HCMV_INFECTION_16HR_UP	BROWNE_HCMV_INFECTION_16HR_UP		213	-0.16718632	-0.7584147	1	0.966363	1	3181	tags=23%, list=18%, signal=28%
LI_AMPLIFIED_IN_LUNG_CANCER	LI_AMPLIFIED_IN_LUNG_CANCER		153	-0.16722241	-0.7573284	1	0.96715957	1	2062	tags=10%, list=11%, signal=12%
HASLINGER_B_CLL_WITH_11Q23_DELETION	HASLINGER_B_CLL_WITH_11Q23_DELETION		20	-0.24705613	-0.7566809	0.83576643	0.9673861	1	2832	tags=30%, list=16%, signal=36%
CHESLER_BRAIN_QTL_CIS	CHESLER_BRAIN_QTL_CIS		63	-0.19569969	-0.7565156	0.93670887	0.9670404	1	2433	tags=21%, list=13%, signal=24%
REACTOME_CTNNB1_PHOSPHORYLATION_CASCADE	REACTOME_CTNNB1_PHOSPHORYLATION_CASCADE		15	-0.26844966	-0.75637835	0.8464286	0.9666265	1	13200	tags=100%, list=73%, signal=373%
MORI_PRE_BI_LYMPHOCYTE_DN	MORI_PRE_BI_LYMPHOCYTE_DN		64	-0.18835747	-0.7557243	0.93835616	0.9668697	1	2474	tags=22%, list=14%, signal=25%
REACTOME_DOWNSTREAM_SIGNALING_EVENTS_OF_B_CELL_RECEPTOR_BCR	REACTOME_DOWNSTREAM_SIGNALING_EVENTS_OF_B_CELL_RECEPTOR_BCR		90	-0.18191394	-0.7547482	0.954955	0.96740496	1	4488	tags=36%, list=25%, signal=47%
BIOCARTA_INTEGRIN_PATHWAY	BIOCARTA_INTEGRIN_PATHWAY		37	-0.20692159	-0.7530652	0.9222798	0.96883404	1	3417	tags=24%, list=19%, signal=30%
MARSON_FOXP3_TARGETS_DN	MARSON_FOXP3_TARGETS_DN		42	-0.20929551	-0.7513365	0.8787879	0.97042507	1	1813	tags=17%, list=10%, signal=18%
ST_B_CELL_ANTIGEN_RECEPTOR	ST_B_CELL_ANTIGEN_RECEPTOR		34	-0.20989178	-0.7510533	0.85281384	0.9701812	1	1035	tags=9%, list=6%, signal=9%
KIM_MYCN_AMPLIFICATION_TARGETS_UP	KIM_MYCN_AMPLIFICATION_TARGETS_UP		77	-0.18060404	-0.7505727	0.974359	0.97016776	1	2855	tags=21%, list=16%, signal=25%
SYED_ESTRADIOL_RESPONSE	SYED_ESTRADIOL_RESPONSE		17	-0.2583861	-0.74958515	0.8081181	0.9707501	1	3045	tags=24%, list=17%, signal=28%
COLLIS_PRKDC_SUBSTRATES	COLLIS_PRKDC_SUBSTRATES		19	-0.25457874	-0.7477788	0.8333333	0.972189	1	13451	tags=100%, list=75%, signal=393%
REACTOME_MICRORNA_MIRNA_BIOGENESIS	REACTOME_MICRORNA_MIRNA_BIOGENESIS		18	-0.2545646	-0.7470915	0.83524907	0.9725215	1	13451	tags=100%, list=75%, signal=393%
GALE_APL_WITH_FLT3_MUTATED_DN	GALE_APL_WITH_FLT3_MUTATED_DN		16	-0.26134673	-0.7468376	0.8405797	0.97228664	1	4047	tags=31%, list=22%, signal=40%
REACTOME_SIGNALING_BY_INSULIN_RECEPTOR	REACTOME_SIGNALING_BY_INSULIN_RECEPTOR		91	-0.17777245	-0.7456648	0.9649123	0.9730132	1	2010	tags=13%, list=11%, signal=15%
REACTOME_REGULATORY_RNA_PATHWAYS	REACTOME_REGULATORY_RNA_PATHWAYS		21	-0.23673402	-0.74436057	0.85714287	0.97399336	1	13773	tags=100%, list=76%, signal=423%
REACTOME_FORMATION_OF_INCISION_COMPLEX_IN_GG_NER	REACTOME_FORMATION_OF_INCISION_COMPLEX_IN_GG_NER		19	-0.24392274	-0.7408488	0.82624114	0.9773427	1	13643	tags=100%, list=76%, signal=410%
SMITH_TERT_TARGETS_UP	SMITH_TERT_TARGETS_UP		141	-0.16714625	-0.73942536	0.98571426	0.9783548	1	4103	tags=31%, list=23%, signal=40%
YAO_TEMPORAL_RESPONSE_TO_PROGESTERONE_CLUSTER_17	YAO_TEMPORAL_RESPONSE_TO_PROGESTERONE_CLUSTER_17		175	-0.159191	-0.7387566	1	0.97847265	1	3397	tags=20%, list=19%, signal=24%
SCHRAMM_INHBA_TARGETS_DN	SCHRAMM_INHBA_TARGETS_DN		23	-0.23194464	-0.7385244	0.85882354	0.97815543	1	1512	tags=13%, list=8%, signal=14%
KYNG_WERNER_SYNDROM_DN	KYNG_WERNER_SYNDROM_DN		24	-0.23139523	-0.73788714	0.8875969	0.9782548	1	3849	tags=33%, list=21%, signal=42%
BIOCARTA_IGF1MTOR_PATHWAY	BIOCARTA_IGF1MTOR_PATHWAY		19	-0.24522354	-0.7374893	0.83793104	0.97807837	1	3779	tags=32%, list=21%, signal=40%
SIG_INSULIN_RECEPTOR_PATHWAY_IN_CARDIAC_MYOCYTES	SIG_INSULIN_RECEPTOR_PATHWAY_IN_CARDIAC_MYOCYTES		47	-0.19894215	-0.7373953	0.9187817	0.9776276	1	3656	tags=28%, list=20%, signal=35%
REACTOME_N_GLYCAN_ANTENNAE_ELONGATION_IN_THE_MEDIAL_TRANS_GOLGI	REACTOME_N_GLYCAN_ANTENNAE_ELONGATION_IN_THE_MEDIAL_TRANS_GOLGI		17	-0.2512283	-0.7371494	0.8409894	0.97733206	1	1989	tags=18%, list=11%, signal=20%
REACTOME_RNA_POL_I_TRANSCRIPTION_TERMINATION	REACTOME_RNA_POL_I_TRANSCRIPTION_TERMINATION		20	-0.24393629	-0.7369914	0.8689655	0.97694993	1	13643	tags=100%, list=76%, signal=410%
STONER_ESOPHAGEAL_CARCINOGENESIS_UP	STONER_ESOPHAGEAL_CARCINOGENESIS_UP		32	-0.21784599	-0.7351797	0.88495576	0.9782752	1	1323	tags=9%, list=7%, signal=10%
KEGG_RNA_POLYMERASE	KEGG_RNA_POLYMERASE		29	-0.2206942	-0.73500395	0.9058296	0.9779312	1	76	tags=3%, list=0%, signal=3%
REACTOME_RNA_POL_II_TRANSCRIPTION	REACTOME_RNA_POL_II_TRANSCRIPTION		96	-0.16663617	-0.7337843	0.98333335	0.97865576	1	13955	tags=99%, list=77%, signal=435%
KEGG_CITRATE_CYCLE_TCA_CYCLE	KEGG_CITRATE_CYCLE_TCA_CYCLE		28	-0.21983452	-0.73269576	0.8595041	0.9791958	1	14079	tags=100%, list=78%, signal=455%
GRABARCZYK_BCL11B_TARGETS_DN	GRABARCZYK_BCL11B_TARGETS_DN		43	-0.20174845	-0.73233557	0.92820513	0.9790207	1	3320	tags=28%, list=18%, signal=34%
WAKABAYASHI_ADIPOGENESIS_PPARG_RXRA_BOUND_WITH_H4K20ME1_MARK	WAKABAYASHI_ADIPOGENESIS_PPARG_RXRA_BOUND_WITH_H4K20ME1_MARK		133	-0.16540866	-0.7322962	0.98630136	0.9785017	1	3020	tags=23%, list=17%, signal=28%
BYSTROEM_CORRELATED_WITH_IL5_DN	BYSTROEM_CORRELATED_WITH_IL5_DN		55	-0.18696171	-0.732074	0.9588235	0.9781705	1	1952	tags=16%, list=11%, signal=18%
REACTOME_REGULATION_OF_KIT_SIGNALING	REACTOME_REGULATION_OF_KIT_SIGNALING		15	-0.25937936	-0.7316587	0.8304498	0.9780416	1	1340	tags=13%, list=7%, signal=14%
KEGG_INTESTINAL_IMMUNE_NETWORK_FOR_IGA_PRODUCTION	KEGG_INTESTINAL_IMMUNE_NETWORK_FOR_IGA_PRODUCTION		22	-0.23559338	-0.7305073	0.88381743	0.9786391	1	232	tags=9%, list=1%, signal=9%
WANG_TARGETS_OF_MLL_CBP_FUSION_UP	WANG_TARGETS_OF_MLL_CBP_FUSION_UP		35	-0.2054698	-0.7300805	0.9047619	0.9785614	1	1718	tags=14%, list=10%, signal=16%
REACTOME_METABOLISM_OF_PROTEINS	REACTOME_METABOLISM_OF_PROTEINS		389	-0.14374208	-0.730044	1	0.97804266	1	3118	tags=15%, list=17%, signal=18%
KEGG_NON_SMALL_CELL_LUNG_CANCER	KEGG_NON_SMALL_CELL_LUNG_CANCER		49	-0.19151773	-0.7294148	0.9673913	0.97808385	1	4669	tags=37%, list=26%, signal=49%
JIANG_AGING_HYPOTHALAMUS_DN	JIANG_AGING_HYPOTHALAMUS_DN		39	-0.20012535	-0.72900254	0.8942731	0.9779972	1	604	tags=5%, list=3%, signal=5%
KYNG_ENVIRONMENTAL_STRESS_RESPONSE_NOT_BY_4NQO_IN_WS	KYNG_ENVIRONMENTAL_STRESS_RESPONSE_NOT_BY_4NQO_IN_WS		35	-0.20840149	-0.72692937	0.9191919	0.9795392	1	3911	tags=40%, list=22%, signal=51%
REACTOME_ANTIGEN_ACTIVATES_B_CELL_RECEPTOR_LEADING_TO_GENERATION_OF_SECOND_MESSENGERS	REACTOME_ANTIGEN_ACTIVATES_B_CELL_RECEPTOR_LEADING_TO_GENERATION_OF_SECOND_MESSENGERS		22	-0.23353282	-0.7237602	0.8902439	0.9820521	1	2247	tags=18%, list=12%, signal=21%
SCHLOSSER_SERUM_RESPONSE_UP	SCHLOSSER_SERUM_RESPONSE_UP		110	-0.16368333	-0.72016305	0.989899	0.9850989	1	2466	tags=15%, list=14%, signal=18%
PID_REG_GR_PATHWAY	PID_REG_GR_PATHWAY		60	-0.18412185	-0.7189248	0.9738562	0.9857413	1	4819	tags=42%, list=27%, signal=57%
BIOCARTA_PGC1A_PATHWAY	BIOCARTA_PGC1A_PATHWAY		21	-0.2289483	-0.71853	0.888	0.98555887	1	2654	tags=24%, list=15%, signal=28%
CHNG_MULTIPLE_MYELOMA_HYPERPLOID_DN	CHNG_MULTIPLE_MYELOMA_HYPERPLOID_DN		28	-0.21275795	-0.718189	0.92771083	0.98531914	1	12323	tags=96%, list=68%, signal=304%
PID_ERA_GENOMIC_PATHWAY	PID_ERA_GENOMIC_PATHWAY		56	-0.18424746	-0.7177314	0.9526627	0.9851774	1	2956	tags=21%, list=16%, signal=26%
TAKAO_RESPONSE_TO_UVB_RADIATION_DN	TAKAO_RESPONSE_TO_UVB_RADIATION_DN		93	-0.17163995	-0.7170406	0.990991	0.9851801	1	2364	tags=15%, list=13%, signal=17%
PID_IL23_PATHWAY	PID_IL23_PATHWAY		18	-0.2339841	-0.7161058	0.8442623	0.9854714	1	2294	tags=22%, list=13%, signal=25%
WATANABE_RECTAL_CANCER_RADIOTHERAPY_RESPONSIVE_UP	WATANABE_RECTAL_CANCER_RADIOTHERAPY_RESPONSIVE_UP		96	-0.1663084	-0.71588886	1	0.98508936	1	2592	tags=15%, list=14%, signal=17%
KEGG_INSULIN_SIGNALING_PATHWAY	KEGG_INSULIN_SIGNALING_PATHWAY		119	-0.16385953	-0.7135039	1	0.9865821	1	3974	tags=29%, list=22%, signal=36%
REACTOME_UNFOLDED_PROTEIN_RESPONSE	REACTOME_UNFOLDED_PROTEIN_RESPONSE		76	-0.17721906	-0.7134812	0.9836066	0.98604864	1	2971	tags=21%, list=16%, signal=25%
KEEN_RESPONSE_TO_ROSIGLITAZONE_UP	KEEN_RESPONSE_TO_ROSIGLITAZONE_UP		35	-0.20488992	-0.71168685	0.9166667	0.98693293	1	3375	tags=26%, list=19%, signal=32%
REACTOME_LATE_PHASE_OF_HIV_LIFE_CYCLE	REACTOME_LATE_PHASE_OF_HIV_LIFE_CYCLE		96	-0.1612953	-0.7100597	0.96	0.98786414	1	3335	tags=18%, list=18%, signal=22%
PID_TCPTP_PATHWAY	PID_TCPTP_PATHWAY		42	-0.19868235	-0.709595	0.9329897	0.9876808	1	4126	tags=33%, list=23%, signal=43%
KYNG_WERNER_SYNDROM_AND_NORMAL_AGING_UP	KYNG_WERNER_SYNDROM_AND_NORMAL_AGING_UP		77	-0.17170826	-0.7084661	1	0.9880606	1	3011	tags=27%, list=17%, signal=33%
PID_SMAD2_3NUCLEAR_PATHWAY	PID_SMAD2_3NUCLEAR_PATHWAY		71	-0.172875	-0.70616716	0.9935484	0.98935694	1	2445	tags=18%, list=14%, signal=21%
BIOCARTA_SPRY_PATHWAY	BIOCARTA_SPRY_PATHWAY		18	-0.2323317	-0.7040521	0.88301885	0.9904809	1	1338	tags=17%, list=7%, signal=18%
BIOCARTA_ERK5_PATHWAY	BIOCARTA_ERK5_PATHWAY		16	-0.2533394	-0.70282495	0.8611111	0.9909399	1	4819	tags=63%, list=27%, signal=85%
DACOSTA_UV_RESPONSE_VIA_ERCC3_XPCS_UP	DACOSTA_UV_RESPONSE_VIA_ERCC3_XPCS_UP		27	-0.21554005	-0.70093745	0.9269231	0.9919097	1	1813	tags=15%, list=10%, signal=16%
LEE_CALORIE_RESTRICTION_NEOCORTEX_DN	LEE_CALORIE_RESTRICTION_NEOCORTEX_DN		77	-0.16835622	-0.7004578	0.9929578	0.9917687	1	3539	tags=26%, list=20%, signal=32%
WU_HBX_TARGETS_1_DN	WU_HBX_TARGETS_1_DN		22	-0.22028625	-0.7002402	0.9025271	0.9913708	1	3789	tags=36%, list=21%, signal=46%
SA_B_CELL_RECEPTOR_COMPLEXES	SA_B_CELL_RECEPTOR_COMPLEXES		21	-0.22508918	-0.69757456	0.86538464	0.99280435	1	3017	tags=24%, list=17%, signal=29%
MORI_PLASMA_CELL_UP	MORI_PLASMA_CELL_UP		49	-0.18723214	-0.6973779	0.9607843	0.9924056	1	1401	tags=10%, list=8%, signal=11%
MARIADASON_RESPONSE_TO_CURCUMIN_SULINDAC_5	MARIADASON_RESPONSE_TO_CURCUMIN_SULINDAC_5		20	-0.22875616	-0.6970063	0.8949416	0.99211735	1	2965	tags=30%, list=16%, signal=36%
APPIERTO_RESPONSE_TO_FENRETINIDE_DN	APPIERTO_RESPONSE_TO_FENRETINIDE_DN		47	-0.18594497	-0.69508606	0.96067417	0.9929876	1	2482	tags=19%, list=14%, signal=22%
JIANG_AGING_HYPOTHALAMUS_UP	JIANG_AGING_HYPOTHALAMUS_UP		44	-0.18304507	-0.6945246	0.9849246	0.9928255	1	4126	tags=30%, list=23%, signal=38%
BIOCARTA_TEL_PATHWAY	BIOCARTA_TEL_PATHWAY		18	-0.23702757	-0.693276	0.8707224	0.9931765	1	13767	tags=100%, list=76%, signal=422%
SIG_PIP3_SIGNALING_IN_CARDIAC_MYOCTES	SIG_PIP3_SIGNALING_IN_CARDIAC_MYOCTES		62	-0.1734754	-0.69302297	0.98675495	0.9928199	1	2410	tags=16%, list=13%, signal=19%
IKEDA_MIR133_TARGETS_UP	IKEDA_MIR133_TARGETS_UP		42	-0.19158548	-0.6927745	0.959596	0.9924375	1	1279	tags=12%, list=7%, signal=13%
WANG_LMO4_TARGETS_DN	WANG_LMO4_TARGETS_DN		322	-0.14124364	-0.6926293	1	0.9920019	1	3102	tags=18%, list=17%, signal=21%
REACTOME_CONVERSION_FROM_APC_C_CDC20_TO_APC_C_CDH1_IN_LATE_ANAPHASE	REACTOME_CONVERSION_FROM_APC_C_CDC20_TO_APC_C_CDH1_IN_LATE_ANAPHASE		16	-0.24554686	-0.69219136	0.8540146	0.9917978	1	13613	tags=100%, list=75%, signal=407%
BLALOCK_ALZHEIMERS_DISEASE_INCIPIENT_DN	BLALOCK_ALZHEIMERS_DISEASE_INCIPIENT_DN		160	-0.15185925	-0.69009566	1	0.99274373	1	3236	tags=20%, list=18%, signal=24%
REACTOME_NEF_MEDIATES_DOWN_MODULATION_OF_CELL_SURFACE_RECEPTORS_BY_RECRUITING_THEM_TO_CLATHRIN_ADAPTERS	REACTOME_NEF_MEDIATES_DOWN_MODULATION_OF_CELL_SURFACE_RECEPTORS_BY_RECRUITING_THEM_TO_CLATHRIN_ADAPTERS		17	-0.24220765	-0.6873876	0.904	0.9940246	1	1538	tags=12%, list=9%, signal=13%
BIOCARTA_CERAMIDE_PATHWAY	BIOCARTA_CERAMIDE_PATHWAY		22	-0.21687484	-0.6870379	0.9166667	0.99369013	1	14131	tags=100%, list=78%, signal=461%
WELCH_GATA1_TARGETS	WELCH_GATA1_TARGETS		18	-0.22954486	-0.68519515	0.9080882	0.9943547	1	2952	tags=33%, list=16%, signal=40%
PID_ARF_3PATHWAY	PID_ARF_3PATHWAY		19	-0.2302213	-0.6847708	0.9015151	0.9940937	1	10992	tags=95%, list=61%, signal=242%
TAKAO_RESPONSE_TO_UVB_RADIATION_UP	TAKAO_RESPONSE_TO_UVB_RADIATION_UP		82	-0.16358712	-0.682582	0.99248123	0.99498975	1	3951	tags=23%, list=22%, signal=30%
LANDIS_ERBB2_BREAST_TUMORS_65_UP	LANDIS_ERBB2_BREAST_TUMORS_65_UP		18	-0.23332885	-0.6794966	0.90510947	0.9964048	1	2993	tags=22%, list=17%, signal=27%
BARRIER_CANCER_RELAPSE_NORMAL_SAMPLE_DN	BARRIER_CANCER_RELAPSE_NORMAL_SAMPLE_DN		30	-0.19750975	-0.67626494	0.94690263	0.997857	1	1098	tags=10%, list=6%, signal=11%
KORKOLA_YOLK_SAC_TUMOR_UP	KORKOLA_YOLK_SAC_TUMOR_UP		18	-0.22986847	-0.67605066	0.9269231	0.99745584	1	13896	tags=100%, list=77%, signal=435%
REACTOME_CITRIC_ACID_CYCLE_TCA_CYCLE	REACTOME_CITRIC_ACID_CYCLE_TCA_CYCLE		19	-0.21972471	-0.66854584	0.936255	1	1	14079	tags=100%, list=78%, signal=455%
REACTOME_GAB1_SIGNALOSOME	REACTOME_GAB1_SIGNALOSOME		36	-0.18993388	-0.66754645	0.94736844	1	1	14619	tags=100%, list=81%, signal=527%
FAELT_B_CLL_WITH_VH3_21_DN	FAELT_B_CLL_WITH_VH3_21_DN		48	-0.17494398	-0.66475886	0.9893617	1	1	3067	tags=27%, list=17%, signal=33%
PID_PI3KCI_PATHWAY	PID_PI3KCI_PATHWAY		36	-0.19399671	-0.66473746	0.98571426	1	1	3545	tags=31%, list=20%, signal=38%
BURTON_ADIPOGENESIS_6	BURTON_ADIPOGENESIS_6		158	-0.14629275	-0.664202	1	1	1	2486	tags=15%, list=14%, signal=17%
JIANG_AGING_CEREBRAL_CORTEX_DN	JIANG_AGING_CEREBRAL_CORTEX_DN		50	-0.17944306	-0.66263235	0.984375	1	1	4113	tags=24%, list=23%, signal=31%
MOOTHA_TCA	MOOTHA_TCA		16	-0.23098147	-0.6615778	0.93189967	1	1	700	tags=6%, list=4%, signal=6%
PID_PS1_PATHWAY	PID_PS1_PATHWAY		43	-0.1806839	-0.66055375	0.98994976	1	1	4013	tags=28%, list=22%, signal=36%
PID_IL6_7_PATHWAY	PID_IL6_7_PATHWAY		40	-0.18579246	-0.66028607	0.96703297	1	1	2565	tags=23%, list=14%, signal=26%
KEGG_MTOR_SIGNALING_PATHWAY	KEGG_MTOR_SIGNALING_PATHWAY		47	-0.17497121	-0.6600845	0.9946524	1	1	3779	tags=30%, list=21%, signal=38%
KEGG_UBIQUITIN_MEDIATED_PROTEOLYSIS	KEGG_UBIQUITIN_MEDIATED_PROTEOLYSIS		129	-0.14462504	-0.6578974	1	1	1	3862	tags=26%, list=21%, signal=32%
SCHEIDEREIT_IKK_TARGETS	SCHEIDEREIT_IKK_TARGETS		17	-0.2163112	-0.6561902	0.9225589	1	1	2785	tags=18%, list=15%, signal=21%
REACTOME_SIGNALING_BY_EGFR_IN_CANCER	REACTOME_SIGNALING_BY_EGFR_IN_CANCER		98	-0.15140502	-0.6538748	1	1	1	4718	tags=34%, list=26%, signal=45%
NOUZOVA_TRETINOIN_AND_H4_ACETYLATION	NOUZOVA_TRETINOIN_AND_H4_ACETYLATION		131	-0.1436996	-0.6538298	1	1	1	4148	tags=27%, list=23%, signal=34%
ST_GAQ_PATHWAY	ST_GAQ_PATHWAY		28	-0.19611913	-0.65266716	0.96747965	1	1	3631	tags=32%, list=20%, signal=40%
PID_PDGFRA_PATHWAY	PID_PDGFRA_PATHWAY		20	-0.21196672	-0.6525344	0.92775667	1	1	4412	tags=30%, list=24%, signal=40%
REACTOME_PI3K_AKT_ACTIVATION	REACTOME_PI3K_AKT_ACTIVATION		35	-0.18992335	-0.6503762	0.9909502	1	1	14619	tags=100%, list=81%, signal=527%
NICK_RESPONSE_TO_PROC_TREATMENT_DN	NICK_RESPONSE_TO_PROC_TREATMENT_DN		24	-0.20089239	-0.64703894	0.94491524	1	1	3961	tags=29%, list=22%, signal=37%
JUBAN_TARGETS_OF_SPI1_AND_FLI1_UP	JUBAN_TARGETS_OF_SPI1_AND_FLI1_UP		104	-0.15389383	-0.6424937	1	1	1	3212	tags=22%, list=18%, signal=27%
ST_P38_MAPK_PATHWAY	ST_P38_MAPK_PATHWAY		37	-0.18104301	-0.64098597	0.984375	1	1	4026	tags=38%, list=22%, signal=49%
PID_IGF1_PATHWAY	PID_IGF1_PATHWAY		29	-0.18619655	-0.63791806	0.9831933	1	1	4819	tags=38%, list=27%, signal=52%
IIZUKA_LIVER_CANCER_PROGRESSION_L0_L1_DN	IIZUKA_LIVER_CANCER_PROGRESSION_L0_L1_DN		21	-0.21220027	-0.6376622	0.936	1	1	14215	tags=100%, list=79%, signal=471%
REACTOME_METABOLISM_OF_MRNA	REACTOME_METABOLISM_OF_MRNA		206	-0.1341269	-0.63552684	1	1	1	5426	tags=35%, list=30%, signal=49%
LEE_AGING_NEOCORTEX_DN	LEE_AGING_NEOCORTEX_DN		58	-0.16441853	-0.6335644	1	1	1	2969	tags=17%, list=16%, signal=21%
FARMER_BREAST_CANCER_CLUSTER_5	FARMER_BREAST_CANCER_CLUSTER_5		17	-0.21126527	-0.6327038	0.95438594	1	1	14231	tags=100%, list=79%, signal=473%
REACTOME_ASPARAGINE_N_LINKED_GLYCOSYLATION	REACTOME_ASPARAGINE_N_LINKED_GLYCOSYLATION		79	-0.15170075	-0.6318951	0.99319726	1	1	2163	tags=13%, list=12%, signal=14%
REACTOME_PIP3_ACTIVATES_AKT_SIGNALING	REACTOME_PIP3_ACTIVATES_AKT_SIGNALING		27	-0.18983898	-0.63098687	0.97321427	1	1	14619	tags=100%, list=81%, signal=527%
PID_RXR_VDR_PATHWAY	PID_RXR_VDR_PATHWAY		23	-0.20278673	-0.62921435	0.9609375	1	1	14385	tags=100%, list=80%, signal=493%
GALLUZZI_PREVENT_MITOCHONDIAL_PERMEABILIZATION	GALLUZZI_PREVENT_MITOCHONDIAL_PERMEABILIZATION		22	-0.20262842	-0.6270616	0.9808429	1	1	3698	tags=36%, list=21%, signal=46%
MARSON_FOXP3_TARGETS_STIMULATED_UP	MARSON_FOXP3_TARGETS_STIMULATED_UP		17	-0.21191752	-0.6252298	0.9419795	1	1	3264	tags=35%, list=18%, signal=43%
NIKOLSKY_BREAST_CANCER_15Q26_AMPLICON	NIKOLSKY_BREAST_CANCER_15Q26_AMPLICON		18	-0.21083261	-0.6235008	0.9381818	1	1	2654	tags=28%, list=15%, signal=33%
PID_CIRCADIAN_PATHWAY	PID_CIRCADIAN_PATHWAY		15	-0.22171518	-0.6223604	0.9419795	1	1	3393	tags=33%, list=19%, signal=41%
YAO_TEMPORAL_RESPONSE_TO_PROGESTERONE_CLUSTER_10	YAO_TEMPORAL_RESPONSE_TO_PROGESTERONE_CLUSTER_10		64	-0.15962616	-0.6200917	1	1	1	3369	tags=20%, list=19%, signal=25%
HASLINGER_B_CLL_WITH_CHROMOSOME_12_TRISOMY	HASLINGER_B_CLL_WITH_CHROMOSOME_12_TRISOMY		21	-0.20089482	-0.6173684	0.94491524	1	1	2727	tags=19%, list=15%, signal=22%
CAFFAREL_RESPONSE_TO_THC_UP	CAFFAREL_RESPONSE_TO_THC_UP		32	-0.18306482	-0.6132089	0.98165137	1	1	3174	tags=25%, list=18%, signal=30%
REACTOME_SEMA4D_IN_SEMAPHORIN_SIGNALING	REACTOME_SEMA4D_IN_SEMAPHORIN_SIGNALING		27	-0.19111255	-0.61285	0.9790795	1	1	2021	tags=15%, list=11%, signal=17%
SCIAN_INVERSED_TARGETS_OF_TP53_AND_TP73_DN	SCIAN_INVERSED_TARGETS_OF_TP53_AND_TP73_DN		29	-0.1815185	-0.61058253	0.9831933	1	1	4178	tags=38%, list=23%, signal=49%
BOGNI_TREATMENT_RELATED_MYELOID_LEUKEMIA_DN	BOGNI_TREATMENT_RELATED_MYELOID_LEUKEMIA_DN		28	-0.1854073	-0.60930574	0.9836066	1	1	14699	tags=100%, list=81%, signal=540%
PID_MET_PATHWAY	PID_MET_PATHWAY		76	-0.14951536	-0.6091658	1	1	1	3193	tags=18%, list=18%, signal=22%
BIOCARTA_HCMV_PATHWAY	BIOCARTA_HCMV_PATHWAY		16	-0.21012992	-0.6046095	0.9489051	1	1	5203	tags=56%, list=29%, signal=79%
PID_DNA_PK_PATHWAY	PID_DNA_PK_PATHWAY		15	-0.21551438	-0.6042803	0.9379085	1	1	14154	tags=100%, list=78%, signal=464%
MARIADASON_REGULATED_BY_HISTONE_ACETYLATION_DN	MARIADASON_REGULATED_BY_HISTONE_ACETYLATION_DN		45	-0.16401342	-0.6040478	0.994709	1	1	2882	tags=20%, list=16%, signal=24%
KEGG_VIBRIO_CHOLERAE_INFECTION	KEGG_VIBRIO_CHOLERAE_INFECTION		47	-0.16211794	-0.60265684	1	1	1	422	tags=4%, list=2%, signal=4%
GAZDA_DIAMOND_BLACKFAN_ANEMIA_PROGENITOR_UP	GAZDA_DIAMOND_BLACKFAN_ANEMIA_PROGENITOR_UP		35	-0.1702117	-0.59993064	0.98571426	1	1	3079	tags=20%, list=17%, signal=24%
FARMER_BREAST_CANCER_CLUSTER_7	FARMER_BREAST_CANCER_CLUSTER_7		16	-0.20417325	-0.59336156	0.9711191	1	1	4693	tags=56%, list=26%, signal=76%
REACTOME_INFLUENZA_LIFE_CYCLE	REACTOME_INFLUENZA_LIFE_CYCLE		133	-0.13012052	-0.5925787	1	1	1	11326	tags=93%, list=63%, signal=249%
BIOCARTA_PYK2_PATHWAY	BIOCARTA_PYK2_PATHWAY		28	-0.1795981	-0.5919678	0.9796748	1	1	4669	tags=39%, list=26%, signal=53%
KEGG_ADIPOCYTOKINE_SIGNALING_PATHWAY	KEGG_ADIPOCYTOKINE_SIGNALING_PATHWAY		55	-0.15210937	-0.58862054	0.99421966	1	1	2973	tags=16%, list=16%, signal=20%
BIOCARTA_CXCR4_PATHWAY	BIOCARTA_CXCR4_PATHWAY		23	-0.18561178	-0.5860914	0.9835391	1	1	214	tags=4%, list=1%, signal=4%
PID_MTOR_4PATHWAY	PID_MTOR_4PATHWAY		68	-0.14718367	-0.58529836	1	1	1	3779	tags=22%, list=21%, signal=28%
WHITE_NEUROBLASTOMA_WITH_1P36.3_DELETION	WHITE_NEUROBLASTOMA_WITH_1P36.3_DELETION		17	-0.19668567	-0.5819369	0.97324413	1	1	3692	tags=29%, list=20%, signal=37%
DING_LUNG_CANCER_EXPRESSION_BY_COPY_NUMBER	DING_LUNG_CANCER_EXPRESSION_BY_COPY_NUMBER		99	-0.1328329	-0.58005595	1	1	1	4348	tags=32%, list=24%, signal=42%
PID_MYC_PATHWAY	PID_MYC_PATHWAY		25	-0.17954697	-0.5800425	0.992674	1	1	14804	tags=100%, list=82%, signal=557%
LANG_MYB_FAMILY_TARGETS	LANG_MYB_FAMILY_TARGETS		27	-0.17810017	-0.5787756	0.98173517	1	1	2746	tags=19%, list=15%, signal=22%
OKAWA_NEUROBLASTOMA_1P36_31_DELETION	OKAWA_NEUROBLASTOMA_1P36_31_DELETION		17	-0.19061705	-0.5787423	0.9822064	1	1	3692	tags=29%, list=20%, signal=37%
KEGG_ALZHEIMERS_DISEASE	KEGG_ALZHEIMERS_DISEASE		138	-0.12997617	-0.5774911	1	1	1	2368	tags=11%, list=13%, signal=12%
BIOCARTA_HDAC_PATHWAY	BIOCARTA_HDAC_PATHWAY		23	-0.18142828	-0.5742177	0.98046875	1	1	3857	tags=39%, list=21%, signal=50%
KEGG_PYRUVATE_METABOLISM	KEGG_PYRUVATE_METABOLISM		34	-0.16936293	-0.57068765	0.990566	1	1	3003	tags=21%, list=17%, signal=25%
NADLER_OBESITY_DN	NADLER_OBESITY_DN		36	-0.16676578	-0.5692063	0.99509805	1	1	4793	tags=44%, list=27%, signal=60%
LIANG_HEMATOPOIESIS_STEM_CELL_NUMBER_SMALL_VS_HUGE_UP	LIANG_HEMATOPOIESIS_STEM_CELL_NUMBER_SMALL_VS_HUGE_UP		31	-0.16862501	-0.56912214	0.9918367	1	1	3779	tags=32%, list=21%, signal=41%
PID_TXA2PATHWAY	PID_TXA2PATHWAY		45	-0.1560118	-0.5685218	0.9945652	1	1	2619	tags=20%, list=15%, signal=23%
REACTOME_TCA_CYCLE_AND_RESPIRATORY_ELECTRON_TRANSPORT	REACTOME_TCA_CYCLE_AND_RESPIRATORY_ELECTRON_TRANSPORT		113	-0.13296685	-0.56557375	1	1	1	700	tags=3%, list=4%, signal=3%
PID_NFKAPPAB_ATYPICAL_PATHWAY	PID_NFKAPPAB_ATYPICAL_PATHWAY		15	-0.19398764	-0.56451833	0.9746377	1	1	399	tags=7%, list=2%, signal=7%
REACTOME_RNA_POL_III_CHAIN_ELONGATION	REACTOME_RNA_POL_III_CHAIN_ELONGATION		17	-0.19361821	-0.56372786	0.9699248	1	1	14549	tags=100%, list=81%, signal=517%
REACTOME_SEMA4D_INDUCED_CELL_MIGRATION_AND_GROWTH_CONE_COLLAPSE	REACTOME_SEMA4D_INDUCED_CELL_MIGRATION_AND_GROWTH_CONE_COLLAPSE		22	-0.17939389	-0.56138635	0.9920319	1	1	178	tags=5%, list=1%, signal=5%
FLECHNER_PBL_KIDNEY_TRANSPLANT_REJECTED_VS_OK_DN	FLECHNER_PBL_KIDNEY_TRANSPLANT_REJECTED_VS_OK_DN		47	-0.15256995	-0.5603817	0.9896907	1	1	3911	tags=28%, list=22%, signal=35%
MOOTHA_HUMAN_MITODB_6_2002	MOOTHA_HUMAN_MITODB_6_2002		399	-0.114406146	-0.55474293	1	1	1	3065	tags=14%, list=17%, signal=17%
BIOCARTA_PTEN_PATHWAY	BIOCARTA_PTEN_PATHWAY		17	-0.18973362	-0.5545645	0.9894366	1	1	14619	tags=100%, list=81%, signal=527%
PID_AJDISS_2PATHWAY	PID_AJDISS_2PATHWAY		42	-0.15047988	-0.5509147	0.9951923	1	1	4438	tags=33%, list=25%, signal=44%
WANG_RESPONSE_TO_FORSKOLIN_UP	WANG_RESPONSE_TO_FORSKOLIN_UP		20	-0.18013725	-0.54870236	0.9887218	1	1	3889	tags=40%, list=22%, signal=51%
GALLUZZI_PERMEABILIZE_MITOCHONDRIA	GALLUZZI_PERMEABILIZE_MITOCHONDRIA		39	-0.15139341	-0.53938055	0.9947917	1	1	1496	tags=10%, list=8%, signal=11%
BIOCARTA_BAD_PATHWAY	BIOCARTA_BAD_PATHWAY		20	-0.18175854	-0.5382501	0.985348	1	1	4819	tags=50%, list=27%, signal=68%
BURTON_ADIPOGENESIS_5	BURTON_ADIPOGENESIS_5		115	-0.122165665	-0.53033525	1	1	1	3120	tags=18%, list=17%, signal=22%
REACTOME_MEMBRANE_TRAFFICKING	REACTOME_MEMBRANE_TRAFFICKING		106	-0.119554795	-0.51899374	1	1	1	2849	tags=13%, list=16%, signal=16%
REACTOME_RNA_POL_I_TRANSCRIPTION_INITIATION	REACTOME_RNA_POL_I_TRANSCRIPTION_INITIATION		23	-0.1632064	-0.51451534	0.9921875	1	1	15098	tags=100%, list=84%, signal=613%
KYNG_ENVIRONMENTAL_STRESS_RESPONSE_NOT_BY_GAMMA_IN_OLD	KYNG_ENVIRONMENTAL_STRESS_RESPONSE_NOT_BY_GAMMA_IN_OLD		27	-0.15499848	-0.51194155	1	1	1	3946	tags=37%, list=22%, signal=47%
ZHAN_LATE_DIFFERENTIATION_GENES_UP	ZHAN_LATE_DIFFERENTIATION_GENES_UP		27	-0.15178078	-0.5057489	0.99206346	1	1	3229	tags=26%, list=18%, signal=32%
REACTOME_RNA_POL_III_TRANSCRIPTION	REACTOME_RNA_POL_III_TRANSCRIPTION		33	-0.14591202	-0.50362194	1	1	1	15411	tags=100%, list=85%, signal=686%
PENG_RAPAMYCIN_RESPONSE_DN	PENG_RAPAMYCIN_RESPONSE_DN		234	-0.10190882	-0.49845633	1	1	1	5155	tags=34%, list=29%, signal=47%
CHOI_ATL_STAGE_PREDICTOR	CHOI_ATL_STAGE_PREDICTOR		39	-0.134228	-0.48941806	1	1	1	4100	tags=31%, list=23%, signal=40%
BIOCARTA_CREB_PATHWAY	BIOCARTA_CREB_PATHWAY		26	-0.14961886	-0.4847609	1	1	1	4819	tags=46%, list=27%, signal=63%
MATZUK_SPERMATID_DIFFERENTIATION	MATZUK_SPERMATID_DIFFERENTIATION		27	-0.14668721	-0.48218834	0.99148935	1	1	4460	tags=26%, list=25%, signal=34%
BIOCARTA_RAS_PATHWAY	BIOCARTA_RAS_PATHWAY		22	-0.15310927	-0.4794317	0.991342	1	1	3012	tags=23%, list=17%, signal=27%
PID_ECADHERIN_KERATINOCYTE_PATHWAY	PID_ECADHERIN_KERATINOCYTE_PATHWAY		18	-0.16175239	-0.47322848	1	1	1	650	tags=6%, list=4%, signal=6%
CREIGHTON_AKT1_SIGNALING_VIA_MTOR_DN	CREIGHTON_AKT1_SIGNALING_VIA_MTOR_DN		22	-0.14574656	-0.46121186	1	1	1	5079	tags=41%, list=28%, signal=57%
MELLMAN_TUT1_TARGETS_UP	MELLMAN_TUT1_TARGETS_UP		17	-0.15562809	-0.45627278	1	1	1	4735	tags=35%, list=26%, signal=48%
BIOCARTA_IGF1R_PATHWAY	BIOCARTA_IGF1R_PATHWAY		22	-0.14516805	-0.4556795	1	1	1	5455	tags=55%, list=30%, signal=78%
KEGG_LYSINE_DEGRADATION	KEGG_LYSINE_DEGRADATION		43	-0.12054018	-0.44210848	1	1	1	15869	tags=100%, list=88%, signal=830%
BIOCARTA_INSULIN_PATHWAY	BIOCARTA_INSULIN_PATHWAY		20	-0.13709275	-0.42470893	1	1	1	15568	tags=100%, list=86%, signal=730%
BIOCARTA_NGF_PATHWAY	BIOCARTA_NGF_PATHWAY		16	-0.13729143	-0.38510993	1	0.9999516	1	3012	tags=19%, list=17%, signal=22%
