# Supplementary material for: Metabolic reprogramming of cancer cells by JMJD6-mediated pre-mRNA splicing associated with therapeutic response to splicing inhibitor
Source: eLife. 2024 Mar 15;12:RP90993. doi: 10.7554/eLife.90993 (PMC10942784; doi:10.7554/eLife.90993)
Supplement: Source data 1. [file elife-90993-data1.zip › Figure 3-supplement 2A (SKNAS) source data .txt]

NAME	GS<br> follow link to MSigDB	GS DETAILS	SIZE	ES	NES	NOM p-val	FDR q-val	FWER p-val	RANK AT MAX	LEADING EDGE
REACTOME_MEIOTIC_RECOMBINATION	REACTOME_MEIOTIC_RECOMBINATION	Details ...	77	-0.80691326	-3.1367083	0	0	0	2126	tags=75%, list=12%, signal=85%
REACTOME_RNA_POL_I_PROMOTER_OPENING	REACTOME_RNA_POL_I_PROMOTER_OPENING	Details ...	57	-0.85174805	-3.1150188	0	0	0	2126	tags=89%, list=12%, signal=101%
ROSTY_CERVICAL_CANCER_PROLIFERATION_CLUSTER	ROSTY_CERVICAL_CANCER_PROLIFERATION_CLUSTER	Details ...	136	-0.7277556	-3.0757318	0	0	0	3532	tags=76%, list=20%, signal=94%
REACTOME_DEPOSITION_OF_NEW_CENPA_CONTAINING_NUCLEOSOMES_AT_THE_CENTROMERE	REACTOME_DEPOSITION_OF_NEW_CENPA_CONTAINING_NUCLEOSOMES_AT_THE_CENTROMERE	Details ...	60	-0.839864	-3.0627437	0	0	0	2126	tags=82%, list=12%, signal=92%
KEGG_SYSTEMIC_LUPUS_ERYTHEMATOSUS	KEGG_SYSTEMIC_LUPUS_ERYTHEMATOSUS	Details ...	92	-0.76291484	-3.0510879	0	0	0	1430	tags=64%, list=8%, signal=69%
REACTOME_PACKAGING_OF_TELOMERE_ENDS	REACTOME_PACKAGING_OF_TELOMERE_ENDS	Details ...	45	-0.8461635	-3.0085335	0	0	0	2126	tags=87%, list=12%, signal=98%
CROONQUIST_IL6_DEPRIVATION_DN	CROONQUIST_IL6_DEPRIVATION_DN	Details ...	98	-0.74239105	-3.006223	0	0	0	3530	tags=79%, list=20%, signal=97%
REACTOME_RNA_POL_I_TRANSCRIPTION	REACTOME_RNA_POL_I_TRANSCRIPTION	Details ...	81	-0.7453197	-2.9688118	0	0	0	2126	tags=64%, list=12%, signal=72%
SOTIRIOU_BREAST_CANCER_GRADE_1_VS_3_UP	SOTIRIOU_BREAST_CANCER_GRADE_1_VS_3_UP	Details ...	146	-0.69328773	-2.9483452	0	0	0	3384	tags=66%, list=19%, signal=80%
REACTOME_TELOMERE_MAINTENANCE	REACTOME_TELOMERE_MAINTENANCE	Details ...	72	-0.7735682	-2.9470417	0	0	0	2877	tags=78%, list=16%, signal=92%
REACTOME_MEIOSIS	REACTOME_MEIOSIS	Details ...	101	-0.72780436	-2.9332707	0	0	0	2126	tags=60%, list=12%, signal=68%
DUTERTRE_ESTRADIOL_RESPONSE_24HR_UP	DUTERTRE_ESTRADIOL_RESPONSE_24HR_UP	Details ...	301	-0.62958634	-2.901391	0	0	0	3396	tags=67%, list=19%, signal=81%
REACTOME_CHROMOSOME_MAINTENANCE	REACTOME_CHROMOSOME_MAINTENANCE	Details ...	111	-0.7022227	-2.8802767	0	0	0	2877	tags=64%, list=16%, signal=76%
KONG_E2F3_TARGETS	KONG_E2F3_TARGETS	Details ...	91	-0.719615	-2.8328083	0	0	0	3283	tags=74%, list=18%, signal=90%
CROONQUIST_NRAS_SIGNALING_DN	CROONQUIST_NRAS_SIGNALING_DN	Details ...	72	-0.7450977	-2.8240497	0	0	0	3505	tags=81%, list=19%, signal=100%
LEE_EARLY_T_LYMPHOCYTE_UP	LEE_EARLY_T_LYMPHOCYTE_UP	Details ...	93	-0.70317084	-2.8177545	0	0	0	2439	tags=70%, list=14%, signal=80%
REACTOME_MEIOTIC_SYNAPSIS	REACTOME_MEIOTIC_SYNAPSIS	Details ...	64	-0.74313813	-2.7689974	0	0	0	2126	tags=66%, list=12%, signal=74%
ZHOU_CELL_CYCLE_GENES_IN_IR_RESPONSE_6HR	ZHOU_CELL_CYCLE_GENES_IN_IR_RESPONSE_6HR	Details ...	81	-0.7019471	-2.7435112	0	0	0	2967	tags=72%, list=16%, signal=85%
ISHIDA_E2F_TARGETS	ISHIDA_E2F_TARGETS	Details ...	51	-0.7704442	-2.7193115	0	0	0	3423	tags=82%, list=19%, signal=101%
REACTOME_RNA_POL_I_RNA_POL_III_AND_MITOCHONDRIAL_TRANSCRIPTION	REACTOME_RNA_POL_I_RNA_POL_III_AND_MITOCHONDRIAL_TRANSCRIPTION	Details ...	114	-0.66085774	-2.7169988	0	0	0	2126	tags=46%, list=12%, signal=52%
REACTOME_AMYLOIDS	REACTOME_AMYLOIDS		67	-0.7192506	-2.70737	0	0	0	1430	tags=72%, list=8%, signal=78%
CHANG_CYCLING_GENES	CHANG_CYCLING_GENES		142	-0.6302271	-2.702312	0	0	0	3288	tags=69%, list=18%, signal=84%
ZHOU_CELL_CYCLE_GENES_IN_IR_RESPONSE_24HR	ZHOU_CELL_CYCLE_GENES_IN_IR_RESPONSE_24HR		118	-0.6688132	-2.6976368	0	0	0	3151	tags=65%, list=17%, signal=79%
ZHANG_TLX_TARGETS_60HR_DN	ZHANG_TLX_TARGETS_60HR_DN		260	-0.5933813	-2.6970413	0	0	0	3792	tags=58%, list=21%, signal=73%
REN_BOUND_BY_E2F	REN_BOUND_BY_E2F		61	-0.72822636	-2.6963181	0	0	0	4080	tags=82%, list=23%, signal=106%
WHITEFORD_PEDIATRIC_CANCER_MARKERS	WHITEFORD_PEDIATRIC_CANCER_MARKERS		112	-0.65190834	-2.6951408	0	0	0	3530	tags=64%, list=20%, signal=79%
KAUFFMANN_MELANOMA_RELAPSE_UP	KAUFFMANN_MELANOMA_RELAPSE_UP		58	-0.72466147	-2.6515584	0	0	0	3081	tags=71%, list=17%, signal=85%
MISSIAGLIA_REGULATED_BY_METHYLATION_DN	MISSIAGLIA_REGULATED_BY_METHYLATION_DN		117	-0.64453965	-2.6384132	0	0	0	4135	tags=70%, list=23%, signal=90%
ZHAN_MULTIPLE_MYELOMA_PR_UP	ZHAN_MULTIPLE_MYELOMA_PR_UP		44	-0.75715005	-2.6153626	0	0	0	3396	tags=77%, list=19%, signal=95%
PUJANA_XPRSS_INT_NETWORK	PUJANA_XPRSS_INT_NETWORK		163	-0.617366	-2.6130452	0	0	0	4303	tags=67%, list=24%, signal=87%
PUJANA_BRCA_CENTERED_NETWORK	PUJANA_BRCA_CENTERED_NETWORK		117	-0.636106	-2.592258	0	0	0	4303	tags=69%, list=24%, signal=90%
ZHANG_TLX_TARGETS_DN	ZHANG_TLX_TARGETS_DN		85	-0.66678125	-2.5869572	0	0	0	3623	tags=78%, list=20%, signal=97%
WINNEPENNINCKX_MELANOMA_METASTASIS_UP	WINNEPENNINCKX_MELANOMA_METASTASIS_UP		153	-0.5917715	-2.556569	0	0	0	4135	tags=61%, list=23%, signal=78%
GRAHAM_CML_DIVIDING_VS_NORMAL_QUIESCENT_UP	GRAHAM_CML_DIVIDING_VS_NORMAL_QUIESCENT_UP		163	-0.57921344	-2.5414755	0	0	0	3416	tags=60%, list=19%, signal=73%
KAMMINGA_EZH2_TARGETS	KAMMINGA_EZH2_TARGETS		40	-0.73955554	-2.4792564	0	0	0	4084	tags=88%, list=23%, signal=113%
REACTOME_CELL_CYCLE	REACTOME_CELL_CYCLE		387	-0.5165115	-2.4671357	0	0	0	2978	tags=41%, list=17%, signal=48%
MOLENAAR_TARGETS_OF_CCND1_AND_CDK4_DN	MOLENAAR_TARGETS_OF_CCND1_AND_CDK4_DN		54	-0.67950714	-2.463694	0	0	0	3414	tags=78%, list=19%, signal=96%
HOFFMANN_LARGE_TO_SMALL_PRE_BII_LYMPHOCYTE_UP	HOFFMANN_LARGE_TO_SMALL_PRE_BII_LYMPHOCYTE_UP		154	-0.57351696	-2.462167	0	0	0	3528	tags=55%, list=20%, signal=68%
KANG_DOXORUBICIN_RESISTANCE_UP	KANG_DOXORUBICIN_RESISTANCE_UP		53	-0.68433934	-2.4550729	0	0	0	3532	tags=85%, list=20%, signal=105%
FARMER_BREAST_CANCER_CLUSTER_2	FARMER_BREAST_CANCER_CLUSTER_2		32	-0.77146775	-2.4413087	0	0	0	3102	tags=81%, list=17%, signal=98%
YU_MYC_TARGETS_UP	YU_MYC_TARGETS_UP		40	-0.70774263	-2.4321723	0	0	0	3505	tags=68%, list=19%, signal=84%
SONG_TARGETS_OF_IE86_CMV_PROTEIN	SONG_TARGETS_OF_IE86_CMV_PROTEIN		60	-0.6556072	-2.4304612	0	0	0	4199	tags=75%, list=23%, signal=97%
GRAHAM_NORMAL_QUIESCENT_VS_NORMAL_DIVIDING_DN	GRAHAM_NORMAL_QUIESCENT_VS_NORMAL_DIVIDING_DN		81	-0.6228625	-2.419987	0	0	0	3505	tags=69%, list=19%, signal=85%
EINAV_INTERFERON_SIGNATURE_IN_CANCER	EINAV_INTERFERON_SIGNATURE_IN_CANCER		25	-0.78804094	-2.4113212	0	0	0	757	tags=32%, list=4%, signal=33%
EGUCHI_CELL_CYCLE_RB1_TARGETS	EGUCHI_CELL_CYCLE_RB1_TARGETS		23	-0.8134784	-2.3771288	0	0	0	3384	tags=100%, list=19%, signal=123%
REACTOME_DNA_STRAND_ELONGATION	REACTOME_DNA_STRAND_ELONGATION		30	-0.74188966	-2.3466997	0	3.1871376E-5	0.001	3532	tags=87%, list=20%, signal=108%
PUJANA_BRCA2_PCC_NETWORK	PUJANA_BRCA2_PCC_NETWORK		392	-0.49563217	-2.346381	0	3.119326E-5	0.001	4328	tags=55%, list=24%, signal=71%
HORIUCHI_WTAP_TARGETS_DN	HORIUCHI_WTAP_TARGETS_DN		296	-0.5011794	-2.3429642	0	3.05434E-5	0.001	3190	tags=44%, list=18%, signal=52%
REACTOME_ACTIVATION_OF_THE_PRE_REPLICATIVE_COMPLEX	REACTOME_ACTIVATION_OF_THE_PRE_REPLICATIVE_COMPLEX		30	-0.72280025	-2.3286743	0	2.9920066E-5	0.001	3532	tags=73%, list=20%, signal=91%
SHEDDEN_LUNG_CANCER_POOR_SURVIVAL_A6	SHEDDEN_LUNG_CANCER_POOR_SURVIVAL_A6		420	-0.49395832	-2.3219984	0	2.9321664E-5	0.001	3909	tags=48%, list=22%, signal=60%
REACTOME_G2_M_CHECKPOINTS	REACTOME_G2_M_CHECKPOINTS		41	-0.667148	-2.3089674	0	2.8746728E-5	0.001	4727	tags=78%, list=26%, signal=106%
REICHERT_MITOSIS_LIN9_TARGETS	REICHERT_MITOSIS_LIN9_TARGETS		28	-0.73846656	-2.304608	0	2.8193906E-5	0.001	4052	tags=86%, list=22%, signal=110%
BURTON_ADIPOGENESIS_PEAK_AT_24HR	BURTON_ADIPOGENESIS_PEAK_AT_24HR		37	-0.7042989	-2.3033636	0	2.7661947E-5	0.001	2649	tags=65%, list=15%, signal=76%
LY_AGING_MIDDLE_DN	LY_AGING_MIDDLE_DN		16	-0.821545	-2.2866578	0	5.4151667E-5	0.002	2307	tags=81%, list=13%, signal=93%
MORI_IMMATURE_B_LYMPHOCYTE_DN	MORI_IMMATURE_B_LYMPHOCYTE_DN		89	-0.5898722	-2.2864828	0	5.3167092E-5	0.002	4084	tags=67%, list=23%, signal=87%
TANG_SENESCENCE_TP53_TARGETS_DN	TANG_SENESCENCE_TP53_TARGETS_DN		51	-0.6446378	-2.2817817	0	5.2217678E-5	0.002	3423	tags=73%, list=19%, signal=89%
PUJANA_BREAST_CANCER_WITH_BRCA1_MUTATED_UP	PUJANA_BREAST_CANCER_WITH_BRCA1_MUTATED_UP		55	-0.6306064	-2.2786815	0	5.130158E-5	0.002	3327	tags=62%, list=18%, signal=76%
WONG_EMBRYONIC_STEM_CELL_CORE	WONG_EMBRYONIC_STEM_CELL_CORE		329	-0.49000868	-2.2717698	0	5.041707E-5	0.002	4080	tags=43%, list=23%, signal=54%
KEGG_DNA_REPLICATION	KEGG_DNA_REPLICATION		36	-0.6850793	-2.2502584	0	4.9562543E-5	0.002	3532	tags=72%, list=20%, signal=90%
BURTON_ADIPOGENESIS_3	BURTON_ADIPOGENESIS_3		101	-0.5571701	-2.2331154	0	7.314452E-5	0.003	3530	tags=68%, list=20%, signal=84%
PID_BARD1_PATHWAY	PID_BARD1_PATHWAY		29	-0.69724965	-2.2329974	0	7.1945426E-5	0.003	2952	tags=52%, list=16%, signal=62%
REACTOME_TRANSCRIPTION	REACTOME_TRANSCRIPTION		195	-0.50800025	-2.2328603	0	7.078502E-5	0.003	2805	tags=33%, list=16%, signal=39%
ODONNELL_TFRC_TARGETS_DN	ODONNELL_TFRC_TARGETS_DN		116	-0.5381724	-2.2074952	0	9.290716E-5	0.004	3326	tags=58%, list=18%, signal=70%
ZHANG_TLX_TARGETS_36HR_DN	ZHANG_TLX_TARGETS_36HR_DN		181	-0.5089347	-2.2034905	0	1.1384854E-4	0.005	4810	tags=69%, list=27%, signal=92%
FUJII_YBX1_TARGETS_DN	FUJII_YBX1_TARGETS_DN		194	-0.5024326	-2.1987484	0	1.1209703E-4	0.005	3576	tags=52%, list=20%, signal=64%
BENPORATH_PROLIFERATION	BENPORATH_PROLIFERATION		136	-0.51966506	-2.185751	0	1.5385383E-4	0.007	4268	tags=56%, list=24%, signal=73%
REACTOME_MITOTIC_M_M_G1_PHASES	REACTOME_MITOTIC_M_M_G1_PHASES		164	-0.50153303	-2.1855736	0	1.515575E-4	0.007	4557	tags=54%, list=25%, signal=71%
GREENBAUM_E2A_TARGETS_UP	GREENBAUM_E2A_TARGETS_UP		31	-0.6668899	-2.1678383	0	2.5350266E-4	0.012	3320	tags=71%, list=18%, signal=87%
MARKEY_RB1_ACUTE_LOF_DN	MARKEY_RB1_ACUTE_LOF_DN		211	-0.48745295	-2.162154	0	3.1115545E-4	0.014	3567	tags=52%, list=20%, signal=64%
REACTOME_ACTIVATION_OF_ATR_IN_RESPONSE_TO_REPLICATION_STRESS	REACTOME_ACTIVATION_OF_ATR_IN_RESPONSE_TO_REPLICATION_STRESS		35	-0.6612868	-2.1611493	0	3.0671037E-4	0.014	4727	tags=77%, list=26%, signal=104%
REACTOME_EXTENSION_OF_TELOMERES	REACTOME_EXTENSION_OF_TELOMERES		27	-0.68395245	-2.1609793	0	3.0239052E-4	0.014	2877	tags=63%, list=16%, signal=75%
MITSIADES_RESPONSE_TO_APLIDIN_DN	MITSIADES_RESPONSE_TO_APLIDIN_DN		240	-0.47766352	-2.1384213	0	3.7797223E-4	0.018	3528	tags=43%, list=20%, signal=52%
LI_WILMS_TUMOR_VS_FETAL_KIDNEY_1_DN	LI_WILMS_TUMOR_VS_FETAL_KIDNEY_1_DN		157	-0.50112516	-2.1359172	0	4.1256065E-4	0.02	4185	tags=51%, list=23%, signal=66%
KEGG_HOMOLOGOUS_RECOMBINATION	KEGG_HOMOLOGOUS_RECOMBINATION		28	-0.6716431	-2.135262	0	4.0698552E-4	0.02	2831	tags=54%, list=16%, signal=63%
KOBAYASHI_EGFR_SIGNALING_24HR_DN	KOBAYASHI_EGFR_SIGNALING_24HR_DN		240	-0.47777325	-2.130563	0	4.391708E-4	0.022	3446	tags=57%, list=19%, signal=69%
REACTOME_DNA_REPLICATION	REACTOME_DNA_REPLICATION		184	-0.48133454	-2.1203308	0	5.4490176E-4	0.028	3423	tags=45%, list=19%, signal=54%
WHITFIELD_CELL_CYCLE_LITERATURE	WHITFIELD_CELL_CYCLE_LITERATURE		44	-0.6191718	-2.1110673	0	6.854E-4	0.036	3264	tags=75%, list=18%, signal=91%
MORI_LARGE_PRE_BII_LYMPHOCYTE_UP	MORI_LARGE_PRE_BII_LYMPHOCYTE_UP		81	-0.55076826	-2.1092508	0	6.950261E-4	0.037	4084	tags=62%, list=23%, signal=79%
ODONNELL_TARGETS_OF_MYC_AND_TFRC_DN	ODONNELL_TARGETS_OF_MYC_AND_TFRC_DN		44	-0.6092487	-2.1069396	0	7.2199415E-4	0.039	3505	tags=66%, list=19%, signal=82%
RHODES_UNDIFFERENTIATED_CANCER	RHODES_UNDIFFERENTIATED_CANCER		67	-0.55222106	-2.0959105	0	8.021327E-4	0.044	2574	tags=45%, list=14%, signal=52%
GAVIN_FOXP3_TARGETS_CLUSTER_P6	GAVIN_FOXP3_TARGETS_CLUSTER_P6		78	-0.54778945	-2.0938451	0	8.0964377E-4	0.044	2630	tags=54%, list=15%, signal=63%
AMUNDSON_GAMMA_RADIATION_RESPONSE	AMUNDSON_GAMMA_RADIATION_RESPONSE		39	-0.62703514	-2.0889437	0	8.684666E-4	0.048	2342	tags=62%, list=13%, signal=71%
WHITFIELD_CELL_CYCLE_S	WHITFIELD_CELL_CYCLE_S		151	-0.4807115	-2.0825422	0	0.001011669	0.056	2653	tags=38%, list=15%, signal=45%
SMID_BREAST_CANCER_LUMINAL_A_DN	SMID_BREAST_CANCER_LUMINAL_A_DN		17	-0.76065296	-2.075019	0	0.001186091	0.066	2422	tags=65%, list=13%, signal=75%
ACEVEDO_LIVER_CANCER_WITH_H3K9ME3_DN	ACEVEDO_LIVER_CANCER_WITH_H3K9ME3_DN		95	-0.5155674	-2.0694563	0	0.001304151	0.074	2110	tags=42%, list=12%, signal=47%
LINDGREN_BLADDER_CANCER_CLUSTER_3_UP	LINDGREN_BLADDER_CANCER_CLUSTER_3_UP		299	-0.4431696	-2.060705	0	0.001621174	0.094	3448	tags=40%, list=19%, signal=49%
REACTOME_MITOTIC_PROMETAPHASE	REACTOME_MITOTIC_PROMETAPHASE		83	-0.5243225	-2.0501754	0	0.001814383	0.106	4557	tags=64%, list=25%, signal=85%
REACTOME_HOMOLOGOUS_RECOMBINATION_REPAIR_OF_REPLICATION_INDEPENDENT_DOUBLE_STRAND_BREAKS	REACTOME_HOMOLOGOUS_RECOMBINATION_REPAIR_OF_REPLICATION_INDEPENDENT_DOUBLE_STRAND_BREAKS		16	-0.73300815	-2.0459995	0	0.001858326	0.11	2831	tags=56%, list=16%, signal=67%
FERRANDO_HOX11_NEIGHBORS	FERRANDO_HOX11_NEIGHBORS		16	-0.7402755	-2.0322535	0.002666667	0.002204315	0.131	3327	tags=75%, list=18%, signal=92%
FINETTI_BREAST_CANCER_KINOME_RED	FINETTI_BREAST_CANCER_KINOME_RED		16	-0.73775357	-2.030605	0	0.002227129	0.134	4080	tags=88%, list=23%, signal=113%
BLUM_RESPONSE_TO_SALIRASIB_DN	BLUM_RESPONSE_TO_SALIRASIB_DN		332	-0.4365959	-2.025553	0	0.002343717	0.141	3416	tags=47%, list=19%, signal=57%
FERREIRA_EWINGS_SARCOMA_UNSTABLE_VS_STABLE_UP	FERREIRA_EWINGS_SARCOMA_UNSTABLE_VS_STABLE_UP		151	-0.48017636	-2.0230994	0	0.002456626	0.147	3489	tags=49%, list=19%, signal=60%
CHEMNITZ_RESPONSE_TO_PROSTAGLANDIN_E2_UP	CHEMNITZ_RESPONSE_TO_PROSTAGLANDIN_E2_UP		138	-0.47391725	-2.0228271	0	0.00243021	0.147	3240	tags=47%, list=18%, signal=57%
VERNELL_RETINOBLASTOMA_PATHWAY_UP	VERNELL_RETINOBLASTOMA_PATHWAY_UP		69	-0.5346679	-2.0198517	0	0.002569706	0.156	2991	tags=59%, list=17%, signal=71%
BENPORATH_ES_1	BENPORATH_ES_1		329	-0.4371961	-2.0030937	0	0.002949373	0.18	3157	tags=36%, list=18%, signal=43%
REACTOME_CELL_CYCLE_MITOTIC	REACTOME_CELL_CYCLE_MITOTIC		303	-0.44464886	-2.0029726	0	0.00291865	0.18	3532	tags=41%, list=20%, signal=50%
FLOTHO_PEDIATRIC_ALL_THERAPY_RESPONSE_DN	FLOTHO_PEDIATRIC_ALL_THERAPY_RESPONSE_DN		24	-0.68381524	-1.9986796	0	0.003020098	0.185	2805	tags=50%, list=16%, signal=59%
REACTOME_LAGGING_STRAND_SYNTHESIS	REACTOME_LAGGING_STRAND_SYNTHESIS		19	-0.7073224	-1.9973276	0	0.003017281	0.186	2877	tags=74%, list=16%, signal=88%
LY_AGING_OLD_DN	LY_AGING_OLD_DN		55	-0.55495524	-1.9968171	0	0.003001342	0.187	4135	tags=60%, list=23%, signal=78%
KEGG_MISMATCH_REPAIR	KEGG_MISMATCH_REPAIR		23	-0.66312945	-1.9918274	0	0.003311625	0.207	2831	tags=57%, list=16%, signal=67%
PID_AURORA_B_PATHWAY	PID_AURORA_B_PATHWAY		39	-0.58899695	-1.9899383	0	0.003404784	0.215	3906	tags=64%, list=22%, signal=82%
PID_PLK1_PATHWAY	PID_PLK1_PATHWAY		46	-0.5705872	-1.989458	0	0.003414474	0.217	2571	tags=46%, list=14%, signal=53%
WU_APOPTOSIS_BY_CDKN1A_VIA_TP53	WU_APOPTOSIS_BY_CDKN1A_VIA_TP53		53	-0.5469961	-1.9864459	0	0.003534228	0.224	2967	tags=64%, list=16%, signal=77%
CHIANG_LIVER_CANCER_SUBCLASS_PROLIFERATION_UP	CHIANG_LIVER_CANCER_SUBCLASS_PROLIFERATION_UP		163	-0.46396083	-1.980855	0	0.003784859	0.241	2439	tags=45%, list=14%, signal=51%
PID_FANCONI_PATHWAY	PID_FANCONI_PATHWAY		47	-0.55802864	-1.9721667	0	0.004276396	0.267	2831	tags=53%, list=16%, signal=63%
ACEVEDO_LIVER_CANCER_WITH_H3K27ME3_DN	ACEVEDO_LIVER_CANCER_WITH_H3K27ME3_DN		162	-0.45348445	-1.9710428	0	0.00424943	0.268	1407	tags=30%, list=8%, signal=32%
SARRIO_EPITHELIAL_MESENCHYMAL_TRANSITION_UP	SARRIO_EPITHELIAL_MESENCHYMAL_TRANSITION_UP		166	-0.4527973	-1.9643831	0	0.004550681	0.286	2997	tags=50%, list=17%, signal=59%
HASLINGER_B_CLL_WITH_6Q21_DELETION	HASLINGER_B_CLL_WITH_6Q21_DELETION		18	-0.69698083	-1.9606482	0	0.00463728	0.292	2064	tags=56%, list=11%, signal=63%
SHEPARD_CRUSH_AND_BURN_MUTANT_DN	SHEPARD_CRUSH_AND_BURN_MUTANT_DN		154	-0.46657202	-1.9564061	0	0.004854666	0.302	3107	tags=43%, list=17%, signal=51%
WHITFIELD_CELL_CYCLE_G2	WHITFIELD_CELL_CYCLE_G2		162	-0.45332155	-1.9555591	0	0.004899475	0.307	3076	tags=40%, list=17%, signal=48%
ABRAMSON_INTERACT_WITH_AIRE	ABRAMSON_INTERACT_WITH_AIRE		44	-0.575979	-1.9539211	0	0.004906031	0.309	4458	tags=59%, list=25%, signal=78%
BIOCARTA_MCM_PATHWAY	BIOCARTA_MCM_PATHWAY		18	-0.686991	-1.9494939	0	0.005230284	0.328	3288	tags=67%, list=18%, signal=81%
REACTOME_E2F_MEDIATED_REGULATION_OF_DNA_REPLICATION	REACTOME_E2F_MEDIATED_REGULATION_OF_DNA_REPLICATION		33	-0.596851	-1.9491848	0	0.005196613	0.329	2955	tags=55%, list=16%, signal=65%
FRASOR_RESPONSE_TO_SERM_OR_FULVESTRANT_DN	FRASOR_RESPONSE_TO_SERM_OR_FULVESTRANT_DN		49	-0.5547267	-1.9448056	0	0.005424173	0.347	4122	tags=71%, list=23%, signal=92%
KEGG_GALACTOSE_METABOLISM	KEGG_GALACTOSE_METABOLISM		20	-0.6683135	-1.9381845	0.00304878	0.005830726	0.372	3217	tags=50%, list=18%, signal=61%
MANALO_HYPOXIA_DN	MANALO_HYPOXIA_DN		280	-0.4237188	-1.9330254	0	0.00602541	0.383	4235	tags=38%, list=23%, signal=49%
LI_WILMS_TUMOR_ANAPLASTIC_UP	LI_WILMS_TUMOR_ANAPLASTIC_UP		19	-0.6736923	-1.9326016	0.002890173	0.00602247	0.387	2902	tags=53%, list=16%, signal=63%
CUI_TCF21_TARGETS_2_UP	CUI_TCF21_TARGETS_2_UP		388	-0.41169083	-1.925532	0	0.006524477	0.412	2456	tags=30%, list=14%, signal=34%
THILLAINADESAN_ZNF217_TARGETS_UP	THILLAINADESAN_ZNF217_TARGETS_UP		43	-0.55804753	-1.9235365	0	0.006613066	0.418	4208	tags=56%, list=23%, signal=73%
SENGUPTA_NASOPHARYNGEAL_CARCINOMA_DN	SENGUPTA_NASOPHARYNGEAL_CARCINOMA_DN		216	-0.43103144	-1.9213573	0	0.006748226	0.425	2730	tags=34%, list=15%, signal=40%
KAUFFMANN_DNA_REPLICATION_GENES	KAUFFMANN_DNA_REPLICATION_GENES		132	-0.4610897	-1.9138606	0	0.007151719	0.445	3403	tags=46%, list=19%, signal=57%
BOYAULT_LIVER_CANCER_SUBCLASS_G3_DN	BOYAULT_LIVER_CANCER_SUBCLASS_G3_DN		36	-0.5649018	-1.9105246	0	0.007465367	0.462	1090	tags=36%, list=6%, signal=38%
UROSEVIC_RESPONSE_TO_IMIQUIMOD	UROSEVIC_RESPONSE_TO_IMIQUIMOD		17	-0.6620958	-1.9048445	0.002808989	0.007934656	0.482	1352	tags=35%, list=7%, signal=38%
OXFORD_RALA_OR_RALB_TARGETS_UP	OXFORD_RALA_OR_RALB_TARGETS_UP		48	-0.52958035	-1.9048222	0	0.007870667	0.482	3446	tags=50%, list=19%, signal=62%
PYEON_HPV_POSITIVE_TUMORS_UP	PYEON_HPV_POSITIVE_TUMORS_UP		83	-0.4768546	-1.8921286	0	0.008992706	0.537	2848	tags=49%, list=16%, signal=58%
REACTOME_FANCONI_ANEMIA_PATHWAY	REACTOME_FANCONI_ANEMIA_PATHWAY		20	-0.6650389	-1.8859823	0	0.009497034	0.556	2643	tags=50%, list=15%, signal=59%
NADERI_BREAST_CANCER_PROGNOSIS_UP	NADERI_BREAST_CANCER_PROGNOSIS_UP		42	-0.53593606	-1.8807961	0	0.010106863	0.579	2886	tags=45%, list=16%, signal=54%
MEISSNER_NPC_HCP_WITH_H3K4ME2	MEISSNER_NPC_HCP_WITH_H3K4ME2		401	-0.39476418	-1.8778665	0	0.010403082	0.595	1917	tags=27%, list=11%, signal=29%
LE_EGR2_TARGETS_UP	LE_EGR2_TARGETS_UP		102	-0.4666664	-1.8747125	0	0.010694992	0.608	3505	tags=55%, list=19%, signal=68%
PAL_PRMT5_TARGETS_UP	PAL_PRMT5_TARGETS_UP		197	-0.4264559	-1.8686299	0	0.011447988	0.637	3697	tags=38%, list=20%, signal=47%
SHEPARD_BMYB_TARGETS	SHEPARD_BMYB_TARGETS		65	-0.5071242	-1.8670365	0	0.011610222	0.646	2529	tags=46%, list=14%, signal=53%
CREIGHTON_ENDOCRINE_THERAPY_RESISTANCE_2	CREIGHTON_ENDOCRINE_THERAPY_RESISTANCE_2		378	-0.3965613	-1.8644118	0	0.011899464	0.652	2966	tags=33%, list=16%, signal=39%
REACTOME_DNA_REPAIR	REACTOME_DNA_REPAIR		101	-0.4634653	-1.8597627	0	0.012345658	0.668	2952	tags=34%, list=16%, signal=40%
CAIRO_PML_TARGETS_BOUND_BY_MYC_UP	CAIRO_PML_TARGETS_BOUND_BY_MYC_UP		22	-0.6253162	-1.8583429	0.00625	0.012423889	0.674	3034	tags=50%, list=17%, signal=60%
BIOCARTA_ATRBRCA_PATHWAY	BIOCARTA_ATRBRCA_PATHWAY		21	-0.6267772	-1.8568643	0	0.012543758	0.682	2642	tags=52%, list=15%, signal=61%
FURUKAWA_DUSP6_TARGETS_PCI35_DN	FURUKAWA_DUSP6_TARGETS_PCI35_DN		67	-0.4895294	-1.8514149	0	0.013216486	0.705	3332	tags=55%, list=18%, signal=67%
REACTOME_DOUBLE_STRAND_BREAK_REPAIR	REACTOME_DOUBLE_STRAND_BREAK_REPAIR		22	-0.63146365	-1.8473822	0	0.013752714	0.727	2952	tags=50%, list=16%, signal=60%
PID_ATM_PATHWAY	PID_ATM_PATHWAY		34	-0.5662147	-1.8447766	0	0.014035945	0.741	2608	tags=29%, list=14%, signal=34%
WHITFIELD_CELL_CYCLE_G1_S	WHITFIELD_CELL_CYCLE_G1_S		134	-0.43873203	-1.8436954	0	0.014066397	0.743	3288	tags=46%, list=18%, signal=55%
NAKAMURA_METASTASIS_MODEL_DN	NAKAMURA_METASTASIS_MODEL_DN		35	-0.5513972	-1.8380854	0	0.014899262	0.771	2660	tags=31%, list=15%, signal=37%
LY_AGING_PREMATURE_DN	LY_AGING_PREMATURE_DN		29	-0.58020747	-1.8375847	0.003184713	0.01486507	0.773	4135	tags=66%, list=23%, signal=85%
REACTOME_M_G1_TRANSITION	REACTOME_M_G1_TRANSITION		77	-0.47143158	-1.8363225	0	0.014910946	0.779	3532	tags=35%, list=20%, signal=43%
KAUFFMANN_DNA_REPAIR_GENES	KAUFFMANN_DNA_REPAIR_GENES		220	-0.41225287	-1.8345063	0	0.015044668	0.783	4019	tags=45%, list=22%, signal=57%
REACTOME_G0_AND_EARLY_G1	REACTOME_G0_AND_EARLY_G1		23	-0.6127103	-1.8252333	0.002976191	0.016578589	0.817	3403	tags=61%, list=19%, signal=75%
REACTOME_PROCESSIVE_SYNTHESIS_ON_THE_LAGGING_STRAND	REACTOME_PROCESSIVE_SYNTHESIS_ON_THE_LAGGING_STRAND		15	-0.68594074	-1.8220358	0	0.017042004	0.827	3532	tags=80%, list=20%, signal=99%
MUELLER_PLURINET	MUELLER_PLURINET		284	-0.399841	-1.816422	0	0.017748568	0.837	4016	tags=45%, list=22%, signal=57%
CHIARETTI_T_ALL_REFRACTORY_TO_THERAPY	CHIARETTI_T_ALL_REFRACTORY_TO_THERAPY		21	-0.6293056	-1.8134009	0.005540166	0.018190695	0.846	2199	tags=38%, list=12%, signal=43%
AFFAR_YY1_TARGETS_DN	AFFAR_YY1_TARGETS_DN		185	-0.4195122	-1.8073865	0	0.01921474	0.871	3945	tags=49%, list=22%, signal=62%
MORI_PRE_BI_LYMPHOCYTE_UP	MORI_PRE_BI_LYMPHOCYTE_UP		73	-0.48052582	-1.8055425	0	0.019380087	0.875	4084	tags=60%, list=23%, signal=78%
ZHANG_BREAST_CANCER_PROGENITORS_UP	ZHANG_BREAST_CANCER_PROGENITORS_UP		403	-0.37961957	-1.8030452	0	0.01973398	0.885	4122	tags=38%, list=23%, signal=48%
TOYOTA_TARGETS_OF_MIR34B_AND_MIR34C	TOYOTA_TARGETS_OF_MIR34B_AND_MIR34C		420	-0.38224608	-1.801626	0	0.019831019	0.889	3834	tags=40%, list=21%, signal=50%
MARTENS_TRETINOIN_RESPONSE_UP	MARTENS_TRETINOIN_RESPONSE_UP		398	-0.38210168	-1.8007427	0	0.01987828	0.889	2174	tags=28%, list=12%, signal=31%
REACTOME_G1_S_SPECIFIC_TRANSCRIPTION	REACTOME_G1_S_SPECIFIC_TRANSCRIPTION		17	-0.6529745	-1.7998796	0.008695652	0.019935964	0.893	2955	tags=71%, list=16%, signal=84%
OLSSON_E2F3_TARGETS_DN	OLSSON_E2F3_TARGETS_DN		41	-0.5286569	-1.7977207	0	0.02027626	0.899	2785	tags=59%, list=15%, signal=69%
GARGALOVIC_RESPONSE_TO_OXIDIZED_PHOSPHOLIPIDS_TURQUOISE_DN	GARGALOVIC_RESPONSE_TO_OXIDIZED_PHOSPHOLIPIDS_TURQUOISE_DN		51	-0.5066856	-1.7927675	0	0.02117168	0.908	3240	tags=49%, list=18%, signal=60%
SCIBETTA_KDM5B_TARGETS_DN	SCIBETTA_KDM5B_TARGETS_DN		75	-0.45308048	-1.7875818	0	0.022165688	0.916	3830	tags=45%, list=21%, signal=57%
REACTOME_SYNTHESIS_OF_DNA	REACTOME_SYNTHESIS_OF_DNA		89	-0.45106944	-1.7872281	0	0.02208823	0.918	2967	tags=38%, list=16%, signal=45%
ALCALAY_AML_BY_NPM1_LOCALIZATION_DN	ALCALAY_AML_BY_NPM1_LOCALIZATION_DN		159	-0.41393793	-1.7863293	0	0.022080734	0.919	3562	tags=45%, list=20%, signal=56%
JI_RESPONSE_TO_FSH_UP	JI_RESPONSE_TO_FSH_UP		69	-0.47390005	-1.7818247	0	0.023058582	0.937	1151	tags=19%, list=6%, signal=20%
BURTON_ADIPOGENESIS_PEAK_AT_16HR	BURTON_ADIPOGENESIS_PEAK_AT_16HR		39	-0.5245029	-1.7816455	0.003154574	0.02295042	0.937	4009	tags=64%, list=22%, signal=82%
SHEPARD_BMYB_MORPHOLINO_DN	SHEPARD_BMYB_MORPHOLINO_DN		161	-0.40012524	-1.78076	0	0.023035683	0.937	2529	tags=35%, list=14%, signal=40%
REACTOME_CYCLIN_A_B1_ASSOCIATED_EVENTS_DURING_G2_M_TRANSITION	REACTOME_CYCLIN_A_B1_ASSOCIATED_EVENTS_DURING_G2_M_TRANSITION		15	-0.6392029	-1.7753242	0.002793296	0.024040293	0.945	4080	tags=67%, list=23%, signal=86%
WANG_RESPONSE_TO_BEXAROTENE_UP	WANG_RESPONSE_TO_BEXAROTENE_UP		26	-0.57390267	-1.7735856	0.017910447	0.024249941	0.947	2658	tags=46%, list=15%, signal=54%
KIM_LRRC3B_TARGETS	KIM_LRRC3B_TARGETS		22	-0.5982835	-1.7698507	0.002985075	0.025021674	0.951	2156	tags=36%, list=12%, signal=41%
REACTOME_MITOTIC_G2_G2_M_PHASES	REACTOME_MITOTIC_G2_G2_M_PHASES		78	-0.46308473	-1.7669483	0	0.02550595	0.954	4080	tags=44%, list=23%, signal=56%
ZHONG_RESPONSE_TO_AZACITIDINE_AND_TSA_DN	ZHONG_RESPONSE_TO_AZACITIDINE_AND_TSA_DN		66	-0.46509987	-1.7665788	0	0.025437418	0.954	3158	tags=33%, list=18%, signal=40%
RUIZ_TNC_TARGETS_DN	RUIZ_TNC_TARGETS_DN		136	-0.42471293	-1.7662452	0	0.025361141	0.954	3288	tags=49%, list=18%, signal=60%
MORI_EMU_MYC_LYMPHOMA_BY_ONSET_TIME_UP	MORI_EMU_MYC_LYMPHOMA_BY_ONSET_TIME_UP		103	-0.42919788	-1.760104	0	0.02659627	0.959	3482	tags=37%, list=19%, signal=45%
PETROVA_PROX1_TARGETS_UP	PETROVA_PROX1_TARGETS_UP		25	-0.5738847	-1.7592345	0	0.026673995	0.959	3264	tags=64%, list=18%, signal=78%
GOLDRATH_ANTIGEN_RESPONSE	GOLDRATH_ANTIGEN_RESPONSE		284	-0.38838643	-1.7583551	0	0.02675986	0.96	3102	tags=39%, list=17%, signal=47%
BOSCO_INTERFERON_INDUCED_ANTIVIRAL_MODULE	BOSCO_INTERFERON_INDUCED_ANTIVIRAL_MODULE		62	-0.4765332	-1.755385	0	0.027351651	0.965	1373	tags=21%, list=8%, signal=23%
GREENBAUM_E2A_TARGETS_DN	GREENBAUM_E2A_TARGETS_DN		17	-0.6285009	-1.7548578	0.020833334	0.02732427	0.965	1060	tags=29%, list=6%, signal=31%
SMID_BREAST_CANCER_RELAPSE_IN_BRAIN_UP	SMID_BREAST_CANCER_RELAPSE_IN_BRAIN_UP		30	-0.5451678	-1.7546909	0.003225806	0.02722367	0.965	2016	tags=43%, list=11%, signal=49%
NABA_PROTEOGLYCANS	NABA_PROTEOGLYCANS		19	-0.63586926	-1.7509693	0.007894737	0.028128132	0.969	1805	tags=42%, list=10%, signal=47%
PYEON_CANCER_HEAD_AND_NECK_VS_CERVICAL_UP	PYEON_CANCER_HEAD_AND_NECK_VS_CERVICAL_UP		173	-0.41023895	-1.7487912	0	0.028543714	0.972	3813	tags=46%, list=21%, signal=57%
CHICAS_RB1_TARGETS_GROWING	CHICAS_RB1_TARGETS_GROWING		230	-0.38462627	-1.7449448	0	0.029485948	0.975	2643	tags=40%, list=15%, signal=46%
BIDUS_METASTASIS_UP	BIDUS_METASTASIS_UP		205	-0.39765313	-1.7431275	0	0.02983256	0.976	4235	tags=45%, list=23%, signal=58%
CHEN_ETV5_TARGETS_TESTIS	CHEN_ETV5_TARGETS_TESTIS		17	-0.6318795	-1.7405993	0.02247191	0.030372981	0.977	3264	tags=65%, list=18%, signal=79%
YE_METASTATIC_LIVER_CANCER	YE_METASTATIC_LIVER_CANCER		19	-0.61173	-1.7354234	0.006006006	0.031671762	0.983	2213	tags=37%, list=12%, signal=42%
VANLOO_SP3_TARGETS_DN	VANLOO_SP3_TARGETS_DN		65	-0.46284717	-1.7319572	0	0.032505106	0.985	3234	tags=49%, list=18%, signal=60%
WHITE_NEUROBLASTOMA_WITH_1P36.3_DELETION	WHITE_NEUROBLASTOMA_WITH_1P36.3_DELETION		17	-0.62357193	-1.7284025	0.016260162	0.033352386	0.987	25	tags=12%, list=0%, signal=12%
MCCABE_HOXC6_TARGETS_DN	MCCABE_HOXC6_TARGETS_DN		21	-0.58803904	-1.7279141	0.008403362	0.03330748	0.988	1533	tags=33%, list=8%, signal=36%
REACTOME_ABC_FAMILY_PROTEINS_MEDIATED_TRANSPORT	REACTOME_ABC_FAMILY_PROTEINS_MEDIATED_TRANSPORT		28	-0.5564883	-1.7252984	0.003205128	0.033887733	0.989	1186	tags=21%, list=7%, signal=23%
TRAYNOR_RETT_SYNDROM_UP	TRAYNOR_RETT_SYNDROM_UP		35	-0.5061801	-1.7234292	0.00330033	0.034223214	0.991	1120	tags=20%, list=6%, signal=21%
NAKAYAMA_SOFT_TISSUE_TUMORS_PCA2_UP	NAKAYAMA_SOFT_TISSUE_TUMORS_PCA2_UP		80	-0.45001262	-1.7189454	0	0.03542074	0.992	2529	tags=48%, list=14%, signal=55%
NABA_COLLAGENS	NABA_COLLAGENS		37	-0.517248	-1.7180685	0.014336918	0.03552801	0.992	776	tags=27%, list=4%, signal=28%
GAL_LEUKEMIC_STEM_CELL_DN	GAL_LEUKEMIC_STEM_CELL_DN		166	-0.39217106	-1.7176245	0	0.035452858	0.992	3015	tags=39%, list=17%, signal=46%
KRASNOSELSKAYA_ILF3_TARGETS_UP	KRASNOSELSKAYA_ILF3_TARGETS_UP		30	-0.5408185	-1.7173338	0.006309148	0.03532456	0.992	1931	tags=37%, list=11%, signal=41%
YANG_BREAST_CANCER_ESR1_BULK_DN	YANG_BREAST_CANCER_ESR1_BULK_DN		19	-0.5898667	-1.712202	0.005797102	0.0368091	0.993	3133	tags=42%, list=17%, signal=51%
MODY_HIPPOCAMPUS_PRENATAL	MODY_HIPPOCAMPUS_PRENATAL		40	-0.5040086	-1.7116977	0.00617284	0.036771405	0.993	4198	tags=48%, list=23%, signal=62%
TERAMOTO_OPN_TARGETS_CLUSTER_6	TERAMOTO_OPN_TARGETS_CLUSTER_6		25	-0.5513465	-1.707692	0.009646302	0.037895475	0.995	2564	tags=40%, list=14%, signal=47%
GHANDHI_DIRECT_IRRADIATION_DN	GHANDHI_DIRECT_IRRADIATION_DN		29	-0.5299146	-1.7060399	0.009646302	0.038268637	0.995	2227	tags=31%, list=12%, signal=35%
CUI_TCF21_TARGETS_UP	CUI_TCF21_TARGETS_UP		34	-0.5175136	-1.7050868	0.00660066	0.03835144	0.996	741	tags=26%, list=4%, signal=28%
BASAKI_YBX1_TARGETS_UP	BASAKI_YBX1_TARGETS_UP		266	-0.36909097	-1.7036375	0	0.038774356	0.997	3012	tags=39%, list=17%, signal=46%
XU_AKT1_TARGETS_6HR	XU_AKT1_TARGETS_6HR		25	-0.56880695	-1.7034546	0.012307692	0.038597316	0.997	2618	tags=36%, list=15%, signal=42%
PID_HEDGEHOG_2PATHWAY	PID_HEDGEHOG_2PATHWAY		18	-0.6155794	-1.7027478	0.02266289	0.03864675	0.997	1613	tags=33%, list=9%, signal=37%
GEORGES_CELL_CYCLE_MIR192_TARGETS	GEORGES_CELL_CYCLE_MIR192_TARGETS		61	-0.45652318	-1.7012397	0.003472222	0.038972907	0.997	4226	tags=48%, list=23%, signal=62%
REACTOME_COLLAGEN_FORMATION	REACTOME_COLLAGEN_FORMATION		48	-0.47568473	-1.6985894	0	0.03968821	0.997	2556	tags=33%, list=14%, signal=39%
RICKMAN_TUMOR_DIFFERENTIATED_WELL_VS_POORLY_UP	RICKMAN_TUMOR_DIFFERENTIATED_WELL_VS_POORLY_UP		221	-0.39096794	-1.6980325	0	0.039647393	0.997	4144	tags=40%, list=23%, signal=51%
BOYAULT_LIVER_CANCER_SUBCLASS_G3_UP	BOYAULT_LIVER_CANCER_SUBCLASS_G3_UP		182	-0.38892293	-1.6979594	0	0.03947757	0.997	4226	tags=35%, list=23%, signal=45%
GRAHAM_CML_QUIESCENT_VS_NORMAL_QUIESCENT_UP	GRAHAM_CML_QUIESCENT_VS_NORMAL_QUIESCENT_UP		73	-0.44032785	-1.6964396	0	0.039738007	0.999	2808	tags=44%, list=16%, signal=52%
VANTVEER_BREAST_CANCER_METASTASIS_DN	VANTVEER_BREAST_CANCER_METASTASIS_DN		112	-0.41919672	-1.6960146	0	0.03964676	0.999	3327	tags=43%, list=18%, signal=52%
WANG_BARRETTS_ESOPHAGUS_AND_ESOPHAGUS_CANCER_DN	WANG_BARRETTS_ESOPHAGUS_AND_ESOPHAGUS_CANCER_DN		22	-0.5707388	-1.6954643	0.008849558	0.03962756	0.999	837	tags=27%, list=5%, signal=29%
IWANAGA_E2F1_TARGETS_INDUCED_BY_SERUM	IWANAGA_E2F1_TARGETS_INDUCED_BY_SERUM		30	-0.5332434	-1.6953155	0.009933775	0.039488353	0.999	4330	tags=63%, list=24%, signal=83%
NIKOLSKY_BREAST_CANCER_5P15_AMPLICON	NIKOLSKY_BREAST_CANCER_5P15_AMPLICON		19	-0.6012031	-1.6931235	0.026086956	0.04012721	0.999	922	tags=32%, list=5%, signal=33%
DELACROIX_RAR_TARGETS_DN	DELACROIX_RAR_TARGETS_DN		20	-0.57743585	-1.6930455	0.00887574	0.039967142	0.999	2367	tags=50%, list=13%, signal=57%
REACTOME_GLOBAL_GENOMIC_NER_GG_NER	REACTOME_GLOBAL_GENOMIC_NER_GG_NER		31	-0.51949733	-1.6917051	0.009146341	0.04019969	0.999	2831	tags=39%, list=16%, signal=46%
LE_NEURONAL_DIFFERENTIATION_DN	LE_NEURONAL_DIFFERENTIATION_DN		19	-0.5873186	-1.6881131	0.01183432	0.0414124	0.999	3263	tags=63%, list=18%, signal=77%
MIKKELSEN_NPC_HCP_WITH_H3K27ME3	MIKKELSEN_NPC_HCP_WITH_H3K27ME3		183	-0.38211283	-1.68099	0	0.04355447	1	1476	tags=21%, list=8%, signal=22%
MORI_MATURE_B_LYMPHOCYTE_DN	MORI_MATURE_B_LYMPHOCYTE_DN		68	-0.4508537	-1.6803337	0	0.04351671	1	4009	tags=50%, list=22%, signal=64%
RIGGI_EWING_SARCOMA_PROGENITOR_DN	RIGGI_EWING_SARCOMA_PROGENITOR_DN		158	-0.3916348	-1.676666	0	0.044726666	1	2008	tags=28%, list=11%, signal=32%
OKAWA_NEUROBLASTOMA_1P36_31_DELETION	OKAWA_NEUROBLASTOMA_1P36_31_DELETION		17	-0.6057673	-1.6716708	0.005698006	0.04640938	1	25	tags=12%, list=0%, signal=12%
PENG_GLUTAMINE_DEPRIVATION_UP	PENG_GLUTAMINE_DEPRIVATION_UP		36	-0.5004814	-1.6702298	0.006269592	0.046795692	1	2401	tags=44%, list=13%, signal=51%
VECCHI_GASTRIC_CANCER_EARLY_UP	VECCHI_GASTRIC_CANCER_EARLY_UP		362	-0.35180962	-1.6694458	0	0.046864454	1	3122	tags=36%, list=17%, signal=43%
CAIRO_LIVER_DEVELOPMENT_DN	CAIRO_LIVER_DEVELOPMENT_DN		141	-0.39357117	-1.6677763	0	0.04728197	1	2687	tags=35%, list=15%, signal=41%
BAUS_TFF2_TARGETS_UP	BAUS_TFF2_TARGETS_UP		18	-0.58021605	-1.6648092	0.028125	0.04836643	1	1383	tags=28%, list=8%, signal=30%
MUELLER_COMMON_TARGETS_OF_AML_FUSIONS_DN	MUELLER_COMMON_TARGETS_OF_AML_FUSIONS_DN		25	-0.5524545	-1.6623384	0.00887574	0.049250394	1	2183	tags=36%, list=12%, signal=41%
WAKASUGI_HAVE_ZNF143_BINDING_SITES	WAKASUGI_HAVE_ZNF143_BINDING_SITES		58	-0.46118125	-1.6600932	0	0.049993582	1	2952	tags=41%, list=16%, signal=49%
CONCANNON_APOPTOSIS_BY_EPOXOMICIN_DN	CONCANNON_APOPTOSIS_BY_EPOXOMICIN_DN		161	-0.3863198	-1.6570618	0	0.050966136	1	3027	tags=38%, list=17%, signal=45%
REACTOME_S_PHASE	REACTOME_S_PHASE		105	-0.4041113	-1.6563039	0	0.05105183	1	3794	tags=40%, list=21%, signal=50%
PID_ATR_PATHWAY	PID_ATR_PATHWAY		39	-0.4912003	-1.6515166	0.006269592	0.05295116	1	3199	tags=51%, list=18%, signal=62%
SENESE_HDAC1_TARGETS_DN	SENESE_HDAC1_TARGETS_DN		222	-0.3710467	-1.6512295	0	0.05280311	1	2026	tags=26%, list=11%, signal=29%
TURASHVILI_BREAST_CARCINOMA_DUCTAL_VS_LOBULAR_UP	TURASHVILI_BREAST_CARCINOMA_DUCTAL_VS_LOBULAR_UP		15	-0.6303997	-1.6482805	0.008379889	0.05383321	1	1417	tags=27%, list=8%, signal=29%
RASHI_RESPONSE_TO_IONIZING_RADIATION_4	RASHI_RESPONSE_TO_IONIZING_RADIATION_4		53	-0.46057054	-1.647951	0.003355705	0.053714138	1	2126	tags=26%, list=12%, signal=30%
GOLUB_ALL_VS_AML_UP	GOLUB_ALL_VS_AML_UP		23	-0.55648154	-1.6477764	0.00862069	0.05356372	1	4147	tags=61%, list=23%, signal=79%
LINDGREN_BLADDER_CANCER_CLUSTER_1_DN	LINDGREN_BLADDER_CANCER_CLUSTER_1_DN		331	-0.3507155	-1.6475008	0	0.053415287	1	3354	tags=39%, list=19%, signal=47%
HESS_TARGETS_OF_HOXA9_AND_MEIS1_UP	HESS_TARGETS_OF_HOXA9_AND_MEIS1_UP		58	-0.44711044	-1.6390003	0	0.057190597	1	3945	tags=43%, list=22%, signal=55%
ROESSLER_LIVER_CANCER_METASTASIS_UP	ROESSLER_LIVER_CANCER_METASTASIS_UP		87	-0.41360217	-1.6344597	0.004830918	0.05920848	1	2637	tags=24%, list=15%, signal=28%
LIM_MAMMARY_LUMINAL_MATURE_UP	LIM_MAMMARY_LUMINAL_MATURE_UP		89	-0.41720906	-1.6333003	0	0.059457406	1	2353	tags=30%, list=13%, signal=35%
FARMER_BREAST_CANCER_CLUSTER_1	FARMER_BREAST_CANCER_CLUSTER_1		17	-0.5910449	-1.6315912	0.008645534	0.05988754	1	621	tags=18%, list=3%, signal=18%
BOYAULT_LIVER_CANCER_SUBCLASS_G23_UP	BOYAULT_LIVER_CANCER_SUBCLASS_G23_UP		49	-0.46264252	-1.6274397	0.00729927	0.061544746	1	3423	tags=49%, list=19%, signal=60%
KEGG_NUCLEOTIDE_EXCISION_REPAIR	KEGG_NUCLEOTIDE_EXCISION_REPAIR		43	-0.4831293	-1.625913	0.010169491	0.06196422	1	4064	tags=42%, list=23%, signal=54%
HOEGERKORP_CD44_TARGETS_DIRECT_UP	HOEGERKORP_CD44_TARGETS_DIRECT_UP		21	-0.54356974	-1.6232088	0.011527377	0.063057736	1	1071	tags=19%, list=6%, signal=20%
SCIAN_CELL_CYCLE_TARGETS_OF_TP53_AND_TP73_DN	SCIAN_CELL_CYCLE_TARGETS_OF_TP53_AND_TP73_DN		22	-0.54402643	-1.619892	0.025	0.06423931	1	3530	tags=73%, list=20%, signal=90%
HADDAD_T_LYMPHOCYTE_AND_NK_PROGENITOR_DN	HADDAD_T_LYMPHOCYTE_AND_NK_PROGENITOR_DN		28	-0.52064484	-1.6180756	0.025477707	0.064964354	1	2191	tags=50%, list=12%, signal=57%
LI_WILMS_TUMOR_VS_FETAL_KIDNEY_2_UP	LI_WILMS_TUMOR_VS_FETAL_KIDNEY_2_UP		26	-0.5255714	-1.6177021	0.011869436	0.06489931	1	4144	tags=62%, list=23%, signal=80%
REACTOME_ACTIVATED_TAK1_MEDIATES_P38_MAPK_ACTIVATION	REACTOME_ACTIVATED_TAK1_MEDIATES_P38_MAPK_ACTIVATION		17	-0.57718766	-1.6172664	0.027439024	0.06484846	1	2144	tags=35%, list=12%, signal=40%
BOYLAN_MULTIPLE_MYELOMA_C_UP	BOYLAN_MULTIPLE_MYELOMA_C_UP		42	-0.47372618	-1.6128364	0.010169491	0.066726476	1	2649	tags=26%, list=15%, signal=31%
WANG_RESPONSE_TO_GSK3_INHIBITOR_SB216763_DN	WANG_RESPONSE_TO_GSK3_INHIBITOR_SB216763_DN		330	-0.34200495	-1.6049759	0	0.070462964	1	3369	tags=40%, list=19%, signal=48%
REACTOME_LOSS_OF_NLP_FROM_MITOTIC_CENTROSOMES	REACTOME_LOSS_OF_NLP_FROM_MITOTIC_CENTROSOMES		56	-0.44010696	-1.6036241	0.010600707	0.07091551	1	4080	tags=43%, list=23%, signal=55%
WHITFIELD_CELL_CYCLE_G2_M	WHITFIELD_CELL_CYCLE_G2_M		195	-0.36757115	-1.6033167	0	0.070803724	1	3364	tags=36%, list=19%, signal=44%
JAEGER_METASTASIS_UP	JAEGER_METASTASIS_UP		40	-0.4716013	-1.6032728	0.009646302	0.07054013	1	3240	tags=43%, list=18%, signal=52%
JOHANSSON_BRAIN_CANCER_EARLY_VS_LATE_DN	JOHANSSON_BRAIN_CANCER_EARLY_VS_LATE_DN		40	-0.46666172	-1.6011386	0.006711409	0.071405336	1	2774	tags=30%, list=15%, signal=35%
RADAEVA_RESPONSE_TO_IFNA1_UP	RADAEVA_RESPONSE_TO_IFNA1_UP		49	-0.4579337	-1.5991232	0.003584229	0.072085395	1	2729	tags=29%, list=15%, signal=34%
REACTOME_RECRUITMENT_OF_MITOTIC_CENTROSOME_PROTEINS_AND_COMPLEXES	REACTOME_RECRUITMENT_OF_MITOTIC_CENTROSOME_PROTEINS_AND_COMPLEXES		63	-0.4257904	-1.598913	0.007843138	0.071964964	1	4080	tags=41%, list=23%, signal=53%
REACTOME_PURINE_METABOLISM	REACTOME_PURINE_METABOLISM		29	-0.5047207	-1.5953137	0.012944984	0.07374854	1	3567	tags=41%, list=20%, signal=51%
MARIADASON_RESPONSE_TO_BUTYRATE_SULINDAC_4	MARIADASON_RESPONSE_TO_BUTYRATE_SULINDAC_4		17	-0.57898885	-1.5934461	0.018918918	0.07450885	1	2266	tags=59%, list=13%, signal=67%
LEE_LIVER_CANCER_MYC_TGFA_UP	LEE_LIVER_CANCER_MYC_TGFA_UP		48	-0.45414907	-1.5933356	0.007272727	0.0742888	1	2240	tags=31%, list=12%, signal=36%
REACTOME_METABOLISM_OF_NUCLEOTIDES	REACTOME_METABOLISM_OF_NUCLEOTIDES		62	-0.43649343	-1.5906678	0.004032258	0.07549475	1	3567	tags=44%, list=20%, signal=54%
YU_MYC_TARGETS_DN	YU_MYC_TARGETS_DN		37	-0.4877925	-1.589978	0.006993007	0.075538605	1	301	tags=19%, list=2%, signal=19%
HU_GENOTOXIC_DAMAGE_4HR	HU_GENOTOXIC_DAMAGE_4HR		35	-0.48169023	-1.58953	0.023738872	0.07549928	1	2257	tags=37%, list=13%, signal=42%
NAKAYAMA_SOFT_TISSUE_TUMORS_PCA1_DN	NAKAYAMA_SOFT_TISSUE_TUMORS_PCA1_DN		60	-0.43436837	-1.5893341	0	0.07527348	1	1818	tags=23%, list=10%, signal=26%
GROSS_HIF1A_TARGETS_DN	GROSS_HIF1A_TARGETS_DN		22	-0.5431566	-1.5879275	0.034267914	0.07572111	1	778	tags=23%, list=4%, signal=24%
REACTOME_CELL_CYCLE_CHECKPOINTS	REACTOME_CELL_CYCLE_CHECKPOINTS		110	-0.38756385	-1.585333	0	0.076928705	1	4727	tags=45%, list=26%, signal=60%
REACTOME_MYOGENESIS	REACTOME_MYOGENESIS		22	-0.5457095	-1.5831246	0.018808777	0.07788746	1	1197	tags=27%, list=7%, signal=29%
HELLER_HDAC_TARGETS_UP	HELLER_HDAC_TARGETS_UP		288	-0.34233797	-1.5814605	0	0.07861215	1	2230	tags=27%, list=12%, signal=30%
BERTUCCI_INVASIVE_CARCINOMA_DUCTAL_VS_LOBULAR_DN	BERTUCCI_INVASIVE_CARCINOMA_DUCTAL_VS_LOBULAR_DN		31	-0.49486065	-1.5813792	0.005847953	0.07834524	1	2918	tags=29%, list=16%, signal=35%
GAZDA_DIAMOND_BLACKFAN_ANEMIA_PROGENITOR_DN	GAZDA_DIAMOND_BLACKFAN_ANEMIA_PROGENITOR_DN		60	-0.4352884	-1.5808629	0.003636364	0.07840043	1	3424	tags=37%, list=19%, signal=45%
BENNETT_SYSTEMIC_LUPUS_ERYTHEMATOSUS	BENNETT_SYSTEMIC_LUPUS_ERYTHEMATOSUS		22	-0.5349784	-1.5793939	0.042016808	0.07890477	1	2043	tags=23%, list=11%, signal=26%
OKAMOTO_LIVER_CANCER_MULTICENTRIC_OCCURRENCE_UP	OKAMOTO_LIVER_CANCER_MULTICENTRIC_OCCURRENCE_UP		21	-0.5429767	-1.574766	0.01724138	0.08142297	1	1188	tags=19%, list=7%, signal=20%
KEGG_PRIMARY_IMMUNODEFICIENCY	KEGG_PRIMARY_IMMUNODEFICIENCY		18	-0.5482145	-1.5711298	0.027247956	0.083552	1	2884	tags=50%, list=16%, signal=59%
REACTOME_IL1_SIGNALING	REACTOME_IL1_SIGNALING		38	-0.46321502	-1.5707169	0.00974026	0.08346083	1	1481	tags=16%, list=8%, signal=17%
DEURIG_T_CELL_PROLYMPHOCYTIC_LEUKEMIA_UP	DEURIG_T_CELL_PROLYMPHOCYTIC_LEUKEMIA_UP		306	-0.3317785	-1.567516	0	0.085137844	1	3383	tags=35%, list=19%, signal=43%
PUJANA_BREAST_CANCER_LIT_INT_NETWORK	PUJANA_BREAST_CANCER_LIT_INT_NETWORK		98	-0.40102255	-1.5671095	0.004651163	0.08506698	1	2952	tags=38%, list=16%, signal=45%
VANDESLUIS_COMMD1_TARGETS_GROUP_3_UP	VANDESLUIS_COMMD1_TARGETS_GROUP_3_UP		62	-0.42802808	-1.5657849	0.011450382	0.08558101	1	1682	tags=32%, list=9%, signal=35%
KEGG_GLYCOLYSIS_GLUCONEOGENESIS	KEGG_GLYCOLYSIS_GLUCONEOGENESIS		43	-0.45909128	-1.5656928	0.010169491	0.08529129	1	2759	tags=28%, list=15%, signal=33%
SHARMA_PILOCYTIC_ASTROCYTOMA_LOCATION_UP	SHARMA_PILOCYTIC_ASTROCYTOMA_LOCATION_UP		18	-0.54096866	-1.5654069	0.031700287	0.0850996	1	1546	tags=28%, list=9%, signal=30%
MIKKELSEN_IPS_LCP_WITH_H3K4ME3	MIKKELSEN_IPS_LCP_WITH_H3K4ME3		112	-0.38264614	-1.5647389	0	0.0851769	1	1495	tags=23%, list=8%, signal=25%
WANG_LSD1_TARGETS_UP	WANG_LSD1_TARGETS_UP		19	-0.553325	-1.5646422	0.037037037	0.08492852	1	1961	tags=32%, list=11%, signal=35%
KEGG_PURINE_METABOLISM	KEGG_PURINE_METABOLISM		134	-0.3611594	-1.5580223	0	0.08885044	1	3222	tags=29%, list=18%, signal=35%
ZHAN_MULTIPLE_MYELOMA_SUBGROUPS	ZHAN_MULTIPLE_MYELOMA_SUBGROUPS		30	-0.48756	-1.5560384	0.018461538	0.08977057	1	4135	tags=43%, list=23%, signal=56%
JECHLINGER_EPITHELIAL_TO_MESENCHYMAL_TRANSITION_UP	JECHLINGER_EPITHELIAL_TO_MESENCHYMAL_TRANSITION_UP		56	-0.43623456	-1.555132	0.017857144	0.09001919	1	1457	tags=23%, list=8%, signal=25%
ABE_INNER_EAR	ABE_INNER_EAR		40	-0.45537657	-1.552519	0.019607844	0.09158615	1	1601	tags=23%, list=9%, signal=25%
SHIPP_DLBCL_VS_FOLLICULAR_LYMPHOMA_UP	SHIPP_DLBCL_VS_FOLLICULAR_LYMPHOMA_UP		42	-0.45216516	-1.5503504	0.022813689	0.0927777	1	4234	tags=43%, list=23%, signal=56%
WEST_ADRENOCORTICAL_TUMOR_MARKERS_UP	WEST_ADRENOCORTICAL_TUMOR_MARKERS_UP		21	-0.5412085	-1.5488795	0.025568182	0.09338992	1	2316	tags=43%, list=13%, signal=49%
ZWANG_EGF_PERSISTENTLY_DN	ZWANG_EGF_PERSISTENTLY_DN		47	-0.4359729	-1.5443091	0.007407407	0.09611104	1	3087	tags=36%, list=17%, signal=44%
REACTOME_LIPID_DIGESTION_MOBILIZATION_AND_TRANSPORT	REACTOME_LIPID_DIGESTION_MOBILIZATION_AND_TRANSPORT		28	-0.49172464	-1.5379893	0.027439024	0.10029286	1	1200	tags=25%, list=7%, signal=27%
SEKI_INFLAMMATORY_RESPONSE_LPS_DN	SEKI_INFLAMMATORY_RESPONSE_LPS_DN		21	-0.5356572	-1.5368172	0.043343652	0.1008025	1	1337	tags=38%, list=7%, signal=41%
COLINA_TARGETS_OF_4EBP1_AND_4EBP2	COLINA_TARGETS_OF_4EBP1_AND_4EBP2		313	-0.3299983	-1.5345339	0	0.10220794	1	2731	tags=30%, list=15%, signal=35%
WANG_CISPLATIN_RESPONSE_AND_XPC_UP	WANG_CISPLATIN_RESPONSE_AND_XPC_UP		164	-0.35029757	-1.5327108	0	0.10297502	1	2615	tags=30%, list=14%, signal=35%
WOO_LIVER_CANCER_RECURRENCE_DN	WOO_LIVER_CANCER_RECURRENCE_DN		58	-0.42242494	-1.5315568	0.003597122	0.10336068	1	2922	tags=28%, list=16%, signal=33%
REACTOME_G1_S_TRANSITION	REACTOME_G1_S_TRANSITION		106	-0.3818807	-1.5295808	0.009259259	0.10451188	1	3794	tags=40%, list=21%, signal=50%
RHEIN_ALL_GLUCOCORTICOID_THERAPY_DN	RHEIN_ALL_GLUCOCORTICOID_THERAPY_DN		349	-0.32564947	-1.5289129	0	0.10459168	1	4490	tags=43%, list=25%, signal=56%
KEGG_ETHER_LIPID_METABOLISM	KEGG_ETHER_LIPID_METABOLISM		22	-0.5097086	-1.52231	0.045180723	0.10906829	1	2651	tags=27%, list=15%, signal=32%
KOBAYASHI_EGFR_SIGNALING_24HR_UP	KOBAYASHI_EGFR_SIGNALING_24HR_UP		86	-0.393321	-1.5213217	0.004444445	0.10947733	1	1639	tags=23%, list=9%, signal=25%
REACTOME_PRE_NOTCH_PROCESSING_IN_GOLGI	REACTOME_PRE_NOTCH_PROCESSING_IN_GOLGI		15	-0.5795637	-1.5207142	0.028571429	0.10957036	1	178	tags=20%, list=1%, signal=20%
BHATTACHARYA_EMBRYONIC_STEM_CELL	BHATTACHARYA_EMBRYONIC_STEM_CELL		75	-0.40454325	-1.5159968	0.008032128	0.1128892	1	4174	tags=40%, list=23%, signal=52%
LIU_COMMON_CANCER_GENES	LIU_COMMON_CANCER_GENES		65	-0.40344143	-1.5143362	0.018115941	0.1137091	1	2543	tags=25%, list=14%, signal=29%
REACTOME_OXYGEN_DEPENDENT_PROLINE_HYDROXYLATION_OF_HYPOXIA_INDUCIBLE_FACTOR_ALPHA	REACTOME_OXYGEN_DEPENDENT_PROLINE_HYDROXYLATION_OF_HYPOXIA_INDUCIBLE_FACTOR_ALPHA		16	-0.5609518	-1.5138432	0.048158642	0.11370493	1	217	tags=13%, list=1%, signal=13%
SENGUPTA_NASOPHARYNGEAL_CARCINOMA_UP	SENGUPTA_NASOPHARYNGEAL_CARCINOMA_UP		267	-0.33042747	-1.5121121	0	0.114832655	1	2965	tags=36%, list=16%, signal=43%
REACTOME_SYNTHESIS_OF_PC	REACTOME_SYNTHESIS_OF_PC		17	-0.5313993	-1.5120409	0.045698926	0.114525974	1	266	tags=18%, list=1%, signal=18%
ZHANG_INTERFERON_RESPONSE	ZHANG_INTERFERON_RESPONSE		20	-0.54285675	-1.5090249	0.055393588	0.11653099	1	2582	tags=35%, list=14%, signal=41%
ACEVEDO_FGFR1_TARGETS_IN_PROSTATE_CANCER_MODEL_DN	ACEVEDO_FGFR1_TARGETS_IN_PROSTATE_CANCER_MODEL_DN		230	-0.33882472	-1.5056429	0	0.1189734	1	1863	tags=20%, list=10%, signal=22%
VALK_AML_CLUSTER_9	VALK_AML_CLUSTER_9		27	-0.48261353	-1.5033362	0.04347826	0.12047451	1	381	tags=19%, list=2%, signal=19%
SU_TESTIS	SU_TESTIS		58	-0.41148788	-1.499705	0.010344828	0.12313368	1	3537	tags=43%, list=20%, signal=53%
HOSHIDA_LIVER_CANCER_SUBCLASS_S2	HOSHIDA_LIVER_CANCER_SUBCLASS_S2		111	-0.36741626	-1.4981586	0	0.12417382	1	1423	tags=13%, list=8%, signal=14%
ISSAEVA_MLL2_TARGETS	ISSAEVA_MLL2_TARGETS		54	-0.4244285	-1.4969302	0.018726591	0.12475205	1	1289	tags=24%, list=7%, signal=26%
SHIN_B_CELL_LYMPHOMA_CLUSTER_7	SHIN_B_CELL_LYMPHOMA_CLUSTER_7		26	-0.4894155	-1.496797	0.03726708	0.12444848	1	1710	tags=31%, list=9%, signal=34%
YAMAZAKI_TCEB3_TARGETS_DN	YAMAZAKI_TCEB3_TARGETS_DN		193	-0.33890092	-1.496128	0	0.124649115	1	3929	tags=38%, list=22%, signal=48%
UDAYAKUMAR_MED1_TARGETS_UP	UDAYAKUMAR_MED1_TARGETS_UP		131	-0.3599411	-1.4955842	0	0.12471604	1	4613	tags=40%, list=26%, signal=54%
SMID_BREAST_CANCER_NORMAL_LIKE_UP	SMID_BREAST_CANCER_NORMAL_LIKE_UP		281	-0.32301435	-1.4951084	0	0.1246549	1	1493	tags=17%, list=8%, signal=18%
WANG_METASTASIS_OF_BREAST_CANCER_ESR1_UP	WANG_METASTASIS_OF_BREAST_CANCER_ESR1_UP		21	-0.50292134	-1.4923903	0.04733728	0.12656318	1	3264	tags=57%, list=18%, signal=70%
REACTOME_MITOTIC_G1_G1_S_PHASES	REACTOME_MITOTIC_G1_G1_S_PHASES		129	-0.36046824	-1.4914554	0	0.12710793	1	3794	tags=40%, list=21%, signal=50%
BRACHAT_RESPONSE_TO_CAMPTOTHECIN_DN	BRACHAT_RESPONSE_TO_CAMPTOTHECIN_DN		43	-0.43794966	-1.4913619	0.0330033	0.12676512	1	4080	tags=42%, list=23%, signal=54%
LOPES_METHYLATED_IN_COLON_CANCER_DN	LOPES_METHYLATED_IN_COLON_CANCER_DN		24	-0.4965387	-1.4912345	0.04416404	0.12644725	1	1499	tags=33%, list=8%, signal=36%
BOYAULT_LIVER_CANCER_SUBCLASS_G123_UP	BOYAULT_LIVER_CANCER_SUBCLASS_G123_UP		42	-0.43007803	-1.490458	0.010452962	0.12655292	1	4439	tags=50%, list=25%, signal=66%
SASSON_RESPONSE_TO_GONADOTROPHINS_UP	SASSON_RESPONSE_TO_GONADOTROPHINS_UP		82	-0.37494472	-1.4895241	0.017621145	0.1269646	1	729	tags=13%, list=4%, signal=14%
BOWIE_RESPONSE_TO_TAMOXIFEN	BOWIE_RESPONSE_TO_TAMOXIFEN		16	-0.55226105	-1.4891905	0.069148935	0.12687996	1	2363	tags=44%, list=13%, signal=50%
LEE_LIVER_CANCER_SURVIVAL_DN	LEE_LIVER_CANCER_SURVIVAL_DN		163	-0.35055393	-1.4884514	0	0.12717098	1	4038	tags=38%, list=22%, signal=49%
KANG_GIST_WITH_PDGFRA_UP	KANG_GIST_WITH_PDGFRA_UP		39	-0.44670367	-1.4880333	0.023890786	0.12718251	1	1475	tags=23%, list=8%, signal=25%
WANG_ADIPOGENIC_GENES_REPRESSED_BY_SIRT1	WANG_ADIPOGENIC_GENES_REPRESSED_BY_SIRT1		21	-0.49509254	-1.485548	0.057057057	0.12892899	1	3164	tags=38%, list=18%, signal=46%
LEIN_PONS_MARKERS	LEIN_PONS_MARKERS		76	-0.38375735	-1.4844017	0.012145749	0.12976749	1	1950	tags=20%, list=11%, signal=22%
GARCIA_TARGETS_OF_FLI1_AND_DAX1_DN	GARCIA_TARGETS_OF_FLI1_AND_DAX1_DN		158	-0.345066	-1.4823581	0	0.13109511	1	3396	tags=34%, list=19%, signal=41%
MEISSNER_NPC_HCP_WITH_H3_UNMETHYLATED	MEISSNER_NPC_HCP_WITH_H3_UNMETHYLATED		361	-0.3146917	-1.4823289	0	0.13069597	1	2188	tags=22%, list=12%, signal=24%
ZHENG_GLIOBLASTOMA_PLASTICITY_UP	ZHENG_GLIOBLASTOMA_PLASTICITY_UP		217	-0.33708343	-1.4809103	0	0.13144699	1	2731	tags=39%, list=15%, signal=46%
GRAESSMANN_RESPONSE_TO_MC_AND_SERUM_DEPRIVATION_UP	GRAESSMANN_RESPONSE_TO_MC_AND_SERUM_DEPRIVATION_UP		164	-0.33572483	-1.4788042	0	0.13293947	1	2467	tags=21%, list=14%, signal=24%
CHANG_CORE_SERUM_RESPONSE_DN	CHANG_CORE_SERUM_RESPONSE_DN		186	-0.33612916	-1.4778677	0	0.13333775	1	1790	tags=20%, list=10%, signal=22%
FURUKAWA_DUSP6_TARGETS_PCI35_UP	FURUKAWA_DUSP6_TARGETS_PCI35_UP		52	-0.41363087	-1.4769236	0.021052632	0.13373932	1	1242	tags=21%, list=7%, signal=23%
DAVICIONI_MOLECULAR_ARMS_VS_ERMS_DN	DAVICIONI_MOLECULAR_ARMS_VS_ERMS_DN		165	-0.3449182	-1.4764057	0	0.13369887	1	766	tags=15%, list=4%, signal=16%
FARDIN_HYPOXIA_11	FARDIN_HYPOXIA_11		32	-0.46071643	-1.476373	0.024464833	0.13332133	1	2369	tags=41%, list=13%, signal=47%
LEIN_ASTROCYTE_MARKERS	LEIN_ASTROCYTE_MARKERS		27	-0.4767451	-1.4738038	0.038922157	0.13525191	1	1630	tags=26%, list=9%, signal=28%
RIZ_ERYTHROID_DIFFERENTIATION_HBZ	RIZ_ERYTHROID_DIFFERENTIATION_HBZ		34	-0.4473413	-1.4731789	0.036303632	0.13536535	1	3459	tags=41%, list=19%, signal=51%
REACTOME_NUCLEOTIDE_EXCISION_REPAIR	REACTOME_NUCLEOTIDE_EXCISION_REPAIR		47	-0.4104603	-1.4649849	0.035928145	0.14270139	1	2831	tags=30%, list=16%, signal=35%
MIKKELSEN_MEF_LCP_WITH_H3K27ME3	MIKKELSEN_MEF_LCP_WITH_H3K27ME3		28	-0.47661084	-1.463277	0.041899443	0.14383315	1	1220	tags=25%, list=7%, signal=27%
KEGG_BASE_EXCISION_REPAIR	KEGG_BASE_EXCISION_REPAIR		33	-0.44550073	-1.4631078	0.028213166	0.14353031	1	2884	tags=36%, list=16%, signal=43%
KEGG_BASAL_CELL_CARCINOMA	KEGG_BASAL_CELL_CARCINOMA		43	-0.42445508	-1.4616531	0.03311258	0.14453146	1	1545	tags=23%, list=9%, signal=25%
RIZ_ERYTHROID_DIFFERENTIATION	RIZ_ERYTHROID_DIFFERENTIATION		70	-0.3871977	-1.4616406	0.015873017	0.14409377	1	3331	tags=41%, list=18%, signal=51%
PRAMOONJAGO_SOX4_TARGETS_DN	PRAMOONJAGO_SOX4_TARGETS_DN		50	-0.413064	-1.4594989	0.03311258	0.145758	1	4289	tags=42%, list=24%, signal=55%
SENESE_HDAC3_TARGETS_DN	SENESE_HDAC3_TARGETS_DN		468	-0.30090302	-1.4583559	0	0.14647515	1	2504	tags=24%, list=14%, signal=27%
XU_HGF_SIGNALING_NOT_VIA_AKT1_48HR_DN	XU_HGF_SIGNALING_NOT_VIA_AKT1_48HR_DN		19	-0.5140835	-1.45426	0.06376812	0.14988078	1	2529	tags=42%, list=14%, signal=49%
NADERI_BREAST_CANCER_PROGNOSIS_DN	NADERI_BREAST_CANCER_PROGNOSIS_DN		15	-0.5400906	-1.4540825	0.06741573	0.14959866	1	3483	tags=47%, list=19%, signal=58%
PENG_RAPAMYCIN_RESPONSE_UP	PENG_RAPAMYCIN_RESPONSE_UP		170	-0.33480486	-1.4532994	0.011976048	0.14992289	1	2264	tags=25%, list=13%, signal=29%
LEE_LIVER_CANCER_DENA_DN	LEE_LIVER_CANCER_DENA_DN		41	-0.43173614	-1.4521779	0.02	0.15050513	1	2695	tags=32%, list=15%, signal=37%
REACTOME_A_TETRASACCHARIDE_LINKER_SEQUENCE_IS_REQUIRED_FOR_GAG_SYNTHESIS	REACTOME_A_TETRASACCHARIDE_LINKER_SEQUENCE_IS_REQUIRED_FOR_GAG_SYNTHESIS		24	-0.48610646	-1.450706	0.04481793	0.15157709	1	2429	tags=42%, list=13%, signal=48%
BOWIE_RESPONSE_TO_EXTRACELLULAR_MATRIX	BOWIE_RESPONSE_TO_EXTRACELLULAR_MATRIX		16	-0.53102523	-1.4483123	0.088319086	0.15355052	1	621	tags=25%, list=3%, signal=26%
ASTON_MAJOR_DEPRESSIVE_DISORDER_UP	ASTON_MAJOR_DEPRESSIVE_DISORDER_UP		40	-0.42990392	-1.4479355	0.019480519	0.15342958	1	681	tags=15%, list=4%, signal=16%
TIAN_BHLHA15_TARGETS	TIAN_BHLHA15_TARGETS		15	-0.54940224	-1.4475514	0.06925208	0.15330215	1	968	tags=27%, list=5%, signal=28%
WANG_RECURRENT_LIVER_CANCER_UP	WANG_RECURRENT_LIVER_CANCER_UP		20	-0.5129604	-1.4456099	0.05691057	0.1548861	1	3478	tags=45%, list=19%, signal=56%
WILCOX_RESPONSE_TO_PROGESTERONE_UP	WILCOX_RESPONSE_TO_PROGESTERONE_UP		132	-0.3512049	-1.4447044	0	0.15541272	1	3102	tags=36%, list=17%, signal=43%
SASAKI_ADULT_T_CELL_LEUKEMIA	SASAKI_ADULT_T_CELL_LEUKEMIA		161	-0.332708	-1.4431483	0.006134969	0.15657419	1	2902	tags=32%, list=16%, signal=37%
HAHTOLA_SEZARY_SYNDROM_UP	HAHTOLA_SEZARY_SYNDROM_UP		71	-0.37732324	-1.4427806	0.015209125	0.15646109	1	2519	tags=28%, list=14%, signal=33%
LUI_THYROID_CANCER_PAX8_PPARG_DN	LUI_THYROID_CANCER_PAX8_PPARG_DN		43	-0.42155233	-1.4401779	0.02866242	0.15868323	1	475	tags=9%, list=3%, signal=10%
CHEN_HOXA5_TARGETS_9HR_DN	CHEN_HOXA5_TARGETS_9HR_DN		38	-0.43618974	-1.4381775	0.03960396	0.16018766	1	3027	tags=42%, list=17%, signal=50%
STEIN_ESRRA_TARGETS_RESPONSIVE_TO_ESTROGEN_DN	STEIN_ESRRA_TARGETS_RESPONSIVE_TO_ESTROGEN_DN		40	-0.40908736	-1.4365436	0.03583062	0.16143392	1	3465	tags=58%, list=19%, signal=71%
WANG_TUMOR_INVASIVENESS_DN	WANG_TUMOR_INVASIVENESS_DN		197	-0.32647675	-1.4359546	0.007142857	0.16159056	1	2771	tags=21%, list=15%, signal=24%
BOQUEST_STEM_CELL_CULTURED_VS_FRESH_DN	BOQUEST_STEM_CELL_CULTURED_VS_FRESH_DN		17	-0.5251679	-1.4356831	0.09090909	0.1613747	1	837	tags=29%, list=5%, signal=31%
YAO_TEMPORAL_RESPONSE_TO_PROGESTERONE_CLUSTER_12	YAO_TEMPORAL_RESPONSE_TO_PROGESTERONE_CLUSTER_12		71	-0.3776665	-1.4356312	0.01953125	0.1609627	1	4866	tags=48%, list=27%, signal=65%
DEBIASI_APOPTOSIS_BY_REOVIRUS_INFECTION_DN	DEBIASI_APOPTOSIS_BY_REOVIRUS_INFECTION_DN		277	-0.3167672	-1.4347273	0	0.16142824	1	2922	tags=25%, list=16%, signal=29%
HEIDENBLAD_AMPLICON_12P11_12_UP	HEIDENBLAD_AMPLICON_12P11_12_UP		31	-0.45322913	-1.4342691	0.05263158	0.16140994	1	3567	tags=42%, list=20%, signal=52%
DANG_MYC_TARGETS_UP	DANG_MYC_TARGETS_UP		133	-0.34106782	-1.4320626	0.010362694	0.16317338	1	4341	tags=37%, list=24%, signal=48%
ZHAN_MULTIPLE_MYELOMA_LB_UP	ZHAN_MULTIPLE_MYELOMA_LB_UP		36	-0.4332959	-1.4314176	0.057401814	0.16338128	1	1951	tags=25%, list=11%, signal=28%
SIMBULAN_PARP1_TARGETS_DN	SIMBULAN_PARP1_TARGETS_DN		16	-0.5202879	-1.430901	0.07183908	0.16346233	1	3354	tags=63%, list=19%, signal=77%
REACTOME_TRANSCRIPTION_COUPLED_NER_TC_NER	REACTOME_TRANSCRIPTION_COUPLED_NER_TC_NER		43	-0.40913343	-1.4284393	0.034351144	0.16560227	1	2831	tags=30%, list=16%, signal=36%
CROONQUIST_IL6_DEPRIVATION_UP	CROONQUIST_IL6_DEPRIVATION_UP		16	-0.5193175	-1.4283116	0.075	0.16527092	1	748	tags=25%, list=4%, signal=26%
GRABARCZYK_BCL11B_TARGETS_DN	GRABARCZYK_BCL11B_TARGETS_DN		43	-0.41489136	-1.4280875	0.034722224	0.1650259	1	1595	tags=23%, list=9%, signal=25%
VISALA_AGING_LYMPHOCYTE_DN	VISALA_AGING_LYMPHOCYTE_DN		19	-0.49064323	-1.4255716	0.077809796	0.16727822	1	1860	tags=26%, list=10%, signal=29%
PETROVA_ENDOTHELIUM_LYMPHATIC_VS_BLOOD_UP	PETROVA_ENDOTHELIUM_LYMPHATIC_VS_BLOOD_UP		114	-0.34609124	-1.4210775	0.009259259	0.17178364	1	2345	tags=37%, list=13%, signal=42%
STEGER_ADIPOGENESIS_DN	STEGER_ADIPOGENESIS_DN		20	-0.4840979	-1.4200715	0.06925208	0.17246334	1	1171	tags=30%, list=6%, signal=32%
REACTOME_PYRUVATE_METABOLISM	REACTOME_PYRUVATE_METABOLISM		17	-0.500162	-1.4195538	0.086419754	0.17247678	1	1939	tags=24%, list=11%, signal=26%
SAGIV_CD24_TARGETS_UP	SAGIV_CD24_TARGETS_UP		20	-0.4928861	-1.4168689	0.060941827	0.17503412	1	1436	tags=20%, list=8%, signal=22%
SANA_RESPONSE_TO_IFNG_UP	SANA_RESPONSE_TO_IFNG_UP		58	-0.38775274	-1.4166082	0.020746889	0.17480685	1	2288	tags=28%, list=13%, signal=31%
LIAO_METASTASIS	LIAO_METASTASIS		491	-0.2924286	-1.4160733	0	0.17499645	1	2975	tags=25%, list=16%, signal=29%
PID_P38_MK2_PATHWAY	PID_P38_MK2_PATHWAY		20	-0.49333727	-1.4157689	0.053672317	0.17479616	1	2678	tags=30%, list=15%, signal=35%
MEISSNER_BRAIN_HCP_WITH_H3K27ME3	MEISSNER_BRAIN_HCP_WITH_H3K27ME3		141	-0.34182936	-1.4154398	0	0.17474101	1	2252	tags=25%, list=12%, signal=28%
SESTO_RESPONSE_TO_UV_C4	SESTO_RESPONSE_TO_UV_C4		17	-0.51877826	-1.4146503	0.07954545	0.17512529	1	2245	tags=35%, list=12%, signal=40%
BREDEMEYER_RAG_SIGNALING_VIA_ATM_NOT_VIA_NFKB_UP	BREDEMEYER_RAG_SIGNALING_VIA_ATM_NOT_VIA_NFKB_UP		42	-0.41280237	-1.411377	0.051612902	0.17832929	1	2688	tags=40%, list=15%, signal=47%
CHICAS_RB1_TARGETS_SENESCENT	CHICAS_RB1_TARGETS_SENESCENT		497	-0.29464248	-1.4094392	0	0.18003611	1	3027	tags=31%, list=17%, signal=36%
WALLACE_PROSTATE_CANCER_RACE_UP	WALLACE_PROSTATE_CANCER_RACE_UP		179	-0.32175466	-1.4089262	0.00591716	0.18013406	1	1414	tags=15%, list=8%, signal=16%
FOURNIER_ACINAR_DEVELOPMENT_LATE_2	FOURNIER_ACINAR_DEVELOPMENT_LATE_2		268	-0.30921358	-1.4071436	0	0.18183976	1	4260	tags=42%, list=24%, signal=54%
WILCOX_RESPONSE_TO_PROGESTERONE_DN	WILCOX_RESPONSE_TO_PROGESTERONE_DN		53	-0.39314982	-1.4059755	0.044444446	0.18271352	1	1499	tags=21%, list=8%, signal=23%
LEIN_CHOROID_PLEXUS_MARKERS	LEIN_CHOROID_PLEXUS_MARKERS		73	-0.37189132	-1.4059671	0.011152417	0.18222484	1	1871	tags=21%, list=10%, signal=23%
RUAN_RESPONSE_TO_TROGLITAZONE_DN	RUAN_RESPONSE_TO_TROGLITAZONE_DN		16	-0.5277989	-1.405872	0.06842105	0.18181549	1	2759	tags=25%, list=15%, signal=29%
REACTOME_NOD1_2_SIGNALING_PATHWAY	REACTOME_NOD1_2_SIGNALING_PATHWAY		28	-0.4493051	-1.405866	0.08387097	0.18133193	1	1481	tags=21%, list=8%, signal=23%
MATTIOLI_MGUS_VS_PCL	MATTIOLI_MGUS_VS_PCL		89	-0.3627733	-1.4050367	0.017621145	0.18184026	1	4021	tags=29%, list=22%, signal=37%
REACTOME_APC_CDC20_MEDIATED_DEGRADATION_OF_NEK2A	REACTOME_APC_CDC20_MEDIATED_DEGRADATION_OF_NEK2A		21	-0.481686	-1.4044924	0.06285714	0.18199831	1	2342	tags=29%, list=13%, signal=33%
REACTOME_ANTIVIRAL_MECHANISM_BY_IFN_STIMULATED_GENES	REACTOME_ANTIVIRAL_MECHANISM_BY_IFN_STIMULATED_GENES		65	-0.37195784	-1.4032642	0.03515625	0.18292886	1	3773	tags=29%, list=21%, signal=37%
MANTOVANI_VIRAL_GPCR_SIGNALING_DN	MANTOVANI_VIRAL_GPCR_SIGNALING_DN		39	-0.4198013	-1.4023784	0.041666668	0.18338501	1	1757	tags=21%, list=10%, signal=23%
PID_INSULIN_GLUCOSE_PATHWAY	PID_INSULIN_GLUCOSE_PATHWAY		22	-0.47030604	-1.401985	0.065714285	0.18335116	1	4522	tags=41%, list=25%, signal=55%
CAFFAREL_RESPONSE_TO_THC_DN	CAFFAREL_RESPONSE_TO_THC_DN		29	-0.44259265	-1.4010448	0.06790123	0.18396154	1	2696	tags=41%, list=15%, signal=49%
CHOW_RASSF1_TARGETS_UP	CHOW_RASSF1_TARGETS_UP		27	-0.454497	-1.3989958	0.061349694	0.18573251	1	3119	tags=33%, list=17%, signal=40%
KIM_TIAL1_TARGETS	KIM_TIAL1_TARGETS		30	-0.44301856	-1.3978627	0.084375	0.18657812	1	3867	tags=40%, list=21%, signal=51%
NABA_CORE_MATRISOME	NABA_CORE_MATRISOME		193	-0.31766316	-1.3975527	0	0.186495	1	990	tags=16%, list=5%, signal=16%
BARIS_THYROID_CANCER_UP	BARIS_THYROID_CANCER_UP		23	-0.46450487	-1.3972269	0.06069364	0.18640965	1	30	tags=4%, list=0%, signal=4%
NIKOLSKY_BREAST_CANCER_16P13_AMPLICON	NIKOLSKY_BREAST_CANCER_16P13_AMPLICON		89	-0.35484248	-1.3964994	0.021929825	0.18679506	1	2688	tags=27%, list=15%, signal=32%
REACTOME_EXTRACELLULAR_MATRIX_ORGANIZATION	REACTOME_EXTRACELLULAR_MATRIX_ORGANIZATION		60	-0.38500103	-1.3963104	0.04379562	0.18652818	1	1058	tags=17%, list=6%, signal=18%
TORCHIA_TARGETS_OF_EWSR1_FLI1_FUSION_TOP20_DN	TORCHIA_TARGETS_OF_EWSR1_FLI1_FUSION_TOP20_DN		15	-0.51656395	-1.3948814	0.082417585	0.18772683	1	859	tags=20%, list=5%, signal=21%
NIKOLSKY_BREAST_CANCER_17Q21_Q25_AMPLICON	NIKOLSKY_BREAST_CANCER_17Q21_Q25_AMPLICON		247	-0.30924505	-1.3947324	0	0.18738091	1	2504	tags=21%, list=14%, signal=24%
BIOCARTA_PGC1A_PATHWAY	BIOCARTA_PGC1A_PATHWAY		21	-0.48566315	-1.3946223	0.06104651	0.18704078	1	906	tags=24%, list=5%, signal=25%
KEGG_ONE_CARBON_POOL_BY_FOLATE	KEGG_ONE_CARBON_POOL_BY_FOLATE		17	-0.49489215	-1.3925724	0.08130081	0.18921229	1	2023	tags=29%, list=11%, signal=33%
NIELSEN_SYNOVIAL_SARCOMA_UP	NIELSEN_SYNOVIAL_SARCOMA_UP		15	-0.52016103	-1.3908598	0.11699165	0.19071448	1	281	tags=20%, list=2%, signal=20%
LEE_LIVER_CANCER_SURVIVAL_UP	LEE_LIVER_CANCER_SURVIVAL_UP		126	-0.33472824	-1.3894017	0.009478673	0.19190827	1	2195	tags=21%, list=12%, signal=23%
SMIRNOV_RESPONSE_TO_IR_6HR_DN	SMIRNOV_RESPONSE_TO_IR_6HR_DN		91	-0.34989136	-1.3892376	0.031007752	0.19159125	1	2422	tags=36%, list=13%, signal=42%
HOSHIDA_LIVER_CANCER_SUBCLASS_S3	HOSHIDA_LIVER_CANCER_SUBCLASS_S3		195	-0.31939718	-1.3891554	0	0.19120483	1	2687	tags=23%, list=15%, signal=26%
SUNG_METASTASIS_STROMA_DN	SUNG_METASTASIS_STROMA_DN		46	-0.3999113	-1.3869282	0.06333333	0.19327676	1	2775	tags=41%, list=15%, signal=49%
PID_WNT_SIGNALING_PATHWAY	PID_WNT_SIGNALING_PATHWAY		21	-0.47649252	-1.3867769	0.09354839	0.19296089	1	1590	tags=29%, list=9%, signal=31%
WNT_SIGNALING	WNT_SIGNALING		72	-0.36536467	-1.386714	0.032786883	0.19253841	1	1469	tags=19%, list=8%, signal=21%
CHIANG_LIVER_CANCER_SUBCLASS_PROLIFERATION_DN	CHIANG_LIVER_CANCER_SUBCLASS_PROLIFERATION_DN		108	-0.3344199	-1.3866524	0.019512195	0.19211423	1	2935	tags=30%, list=16%, signal=35%
SLEBOS_HEAD_AND_NECK_CANCER_WITH_HPV_UP	SLEBOS_HEAD_AND_NECK_CANCER_WITH_HPV_UP		74	-0.3651995	-1.386459	0.03409091	0.19185302	1	2751	tags=36%, list=15%, signal=43%
POOLA_INVASIVE_BREAST_CANCER_UP	POOLA_INVASIVE_BREAST_CANCER_UP		169	-0.31652218	-1.386391	0.005555556	0.19143222	1	2439	tags=37%, list=14%, signal=42%
MARKEY_RB1_CHRONIC_LOF_UP	MARKEY_RB1_CHRONIC_LOF_UP		103	-0.3441501	-1.381452	0.023255814	0.19681832	1	3327	tags=46%, list=18%, signal=56%
MIKKELSEN_MEF_HCP_WITH_H3K27ME3	MIKKELSEN_MEF_HCP_WITH_H3K27ME3		324	-0.2967319	-1.3787932	0	0.1996783	1	1542	tags=19%, list=9%, signal=20%
MORI_LARGE_PRE_BII_LYMPHOCYTE_DN	MORI_LARGE_PRE_BII_LYMPHOCYTE_DN		46	-0.38811353	-1.3781775	0.05498282	0.1999087	1	3088	tags=30%, list=17%, signal=37%
LI_WILMS_TUMOR	LI_WILMS_TUMOR		18	-0.48496017	-1.3760552	0.0960961	0.20210138	1	1393	tags=22%, list=8%, signal=24%
BENPORATH_ES_2	BENPORATH_ES_2		29	-0.4404984	-1.3734696	0.079178885	0.20477	1	1949	tags=34%, list=11%, signal=39%
KEGG_HEDGEHOG_SIGNALING_PATHWAY	KEGG_HEDGEHOG_SIGNALING_PATHWAY		37	-0.41681305	-1.3731394	0.06962025	0.20466018	1	2009	tags=24%, list=11%, signal=27%
OXFORD_RALA_OR_RALB_TARGETS_DN	OXFORD_RALA_OR_RALB_TARGETS_DN		23	-0.45353642	-1.3722997	0.10989011	0.20515719	1	1457	tags=26%, list=8%, signal=28%
ZHANG_RESPONSE_TO_IKK_INHIBITOR_AND_TNF_DN	ZHANG_RESPONSE_TO_IKK_INHIBITOR_AND_TNF_DN		95	-0.34871152	-1.3714705	0.025510205	0.2057464	1	3264	tags=38%, list=18%, signal=46%
KASLER_HDAC7_TARGETS_1_DN	KASLER_HDAC7_TARGETS_1_DN		17	-0.4991508	-1.3650848	0.097222224	0.21329547	1	2759	tags=47%, list=15%, signal=56%
NAKAMURA_CANCER_MICROENVIRONMENT_DN	NAKAMURA_CANCER_MICROENVIRONMENT_DN		42	-0.39872	-1.3618197	0.053156145	0.21699871	1	3240	tags=38%, list=18%, signal=46%
MEISSNER_BRAIN_HCP_WITH_H3K4ME2_AND_H3K27ME3	MEISSNER_BRAIN_HCP_WITH_H3K4ME2_AND_H3K27ME3		33	-0.41435352	-1.3586901	0.07530121	0.22065571	1	2533	tags=30%, list=14%, signal=35%
BONOME_OVARIAN_CANCER_POOR_SURVIVAL_DN	BONOME_OVARIAN_CANCER_POOR_SURVIVAL_DN		21	-0.48097685	-1.3574721	0.11176471	0.22176746	1	4194	tags=48%, list=23%, signal=62%
GAJATE_RESPONSE_TO_TRABECTEDIN_DN	GAJATE_RESPONSE_TO_TRABECTEDIN_DN		19	-0.4662631	-1.355681	0.089918256	0.22383475	1	4396	tags=47%, list=24%, signal=63%
KEGG_OOCYTE_MEIOSIS	KEGG_OOCYTE_MEIOSIS		95	-0.3357647	-1.3553965	0.038961038	0.22365701	1	3750	tags=37%, list=21%, signal=46%
REACTOME_IRON_UPTAKE_AND_TRANSPORT	REACTOME_IRON_UPTAKE_AND_TRANSPORT		32	-0.4253203	-1.3551419	0.08024691	0.22345576	1	412	tags=13%, list=2%, signal=13%
LIM_MAMMARY_STEM_CELL_UP	LIM_MAMMARY_STEM_CELL_UP		405	-0.2868111	-1.3544434	0	0.2237992	1	1502	tags=17%, list=8%, signal=18%
HOLLEMAN_PREDNISOLONE_RESISTANCE_B_ALL_UP	HOLLEMAN_PREDNISOLONE_RESISTANCE_B_ALL_UP		22	-0.46606833	-1.3540187	0.10644258	0.22390665	1	4942	tags=50%, list=27%, signal=69%
PANGAS_TUMOR_SUPPRESSION_BY_SMAD1_AND_SMAD5_UP	PANGAS_TUMOR_SUPPRESSION_BY_SMAD1_AND_SMAD5_UP		114	-0.33377215	-1.353692	0.024630541	0.22375493	1	1464	tags=20%, list=8%, signal=22%
CHANDRAN_METASTASIS_TOP50_DN	CHANDRAN_METASTASIS_TOP50_DN		44	-0.39698243	-1.3507329	0.048076924	0.22727399	1	710	tags=16%, list=4%, signal=17%
SMID_BREAST_CANCER_RELAPSE_IN_LUNG_DN	SMID_BREAST_CANCER_RELAPSE_IN_LUNG_DN		17	-0.48009992	-1.3490324	0.11780822	0.22902334	1	3079	tags=65%, list=17%, signal=78%
ICHIBA_GRAFT_VERSUS_HOST_DISEASE_35D_DN	ICHIBA_GRAFT_VERSUS_HOST_DISEASE_35D_DN		28	-0.42342332	-1.3489255	0.100286536	0.22866774	1	1811	tags=21%, list=10%, signal=24%
RHODES_CANCER_META_SIGNATURE	RHODES_CANCER_META_SIGNATURE		64	-0.36492324	-1.348548	0.038610037	0.22871968	1	4813	tags=44%, list=27%, signal=59%
CHIARADONNA_NEOPLASTIC_TRANSFORMATION_CDC25_DN	CHIARADONNA_NEOPLASTIC_TRANSFORMATION_CDC25_DN		141	-0.31863362	-1.3477792	0.005617978	0.22919308	1	938	tags=13%, list=5%, signal=14%
DER_IFN_ALPHA_RESPONSE_UP	DER_IFN_ALPHA_RESPONSE_UP		69	-0.35764167	-1.3462712	0.040590405	0.23072396	1	2593	tags=20%, list=14%, signal=24%
JOSEPH_RESPONSE_TO_SODIUM_BUTYRATE_DN	JOSEPH_RESPONSE_TO_SODIUM_BUTYRATE_DN		53	-0.3736169	-1.3432897	0.049808428	0.23454633	1	1886	tags=19%, list=10%, signal=21%
MIKKELSEN_MCV6_HCP_WITH_H3K27ME3	MIKKELSEN_MCV6_HCP_WITH_H3K27ME3		272	-0.28962326	-1.3428416	0.008474576	0.23458736	1	1722	tags=20%, list=10%, signal=22%
REACTOME_BASE_EXCISION_REPAIR	REACTOME_BASE_EXCISION_REPAIR		18	-0.48537514	-1.3423065	0.117142856	0.23474675	1	2615	tags=39%, list=14%, signal=45%
BAELDE_DIABETIC_NEPHROPATHY_UP	BAELDE_DIABETIC_NEPHROPATHY_UP		58	-0.36993894	-1.3419328	0.065972224	0.23469257	1	1331	tags=21%, list=7%, signal=22%
MCGARVEY_SILENCED_BY_METHYLATION_IN_COLON_CANCER	MCGARVEY_SILENCED_BY_METHYLATION_IN_COLON_CANCER		29	-0.418887	-1.3414302	0.098101266	0.23479973	1	1225	tags=24%, list=7%, signal=26%
IRITANI_MAD1_TARGETS_DN	IRITANI_MAD1_TARGETS_DN		45	-0.38634172	-1.3407009	0.06779661	0.23527083	1	5601	tags=53%, list=31%, signal=77%
MARIADASON_RESPONSE_TO_CURCUMIN_SULINDAC_5	MARIADASON_RESPONSE_TO_CURCUMIN_SULINDAC_5		20	-0.45995754	-1.3395842	0.09943182	0.23630205	1	85	tags=10%, list=0%, signal=10%
REACTOME_REGULATION_OF_MITOTIC_CELL_CYCLE	REACTOME_REGULATION_OF_MITOTIC_CELL_CYCLE		76	-0.34500483	-1.3365138	0.055084746	0.24019632	1	2342	tags=18%, list=13%, signal=21%
ST_WNT_BETA_CATENIN_PATHWAY	ST_WNT_BETA_CATENIN_PATHWAY		31	-0.4214432	-1.3349209	0.08682635	0.2419973	1	1486	tags=19%, list=8%, signal=21%
SANSOM_APC_TARGETS_UP	SANSOM_APC_TARGETS_UP		102	-0.32862353	-1.3331286	0.022522522	0.24429142	1	3063	tags=32%, list=17%, signal=39%
BERTUCCI_MEDULLARY_VS_DUCTAL_BREAST_CANCER_DN	BERTUCCI_MEDULLARY_VS_DUCTAL_BREAST_CANCER_DN		146	-0.30769145	-1.3314154	0.016949153	0.24619868	1	1990	tags=19%, list=11%, signal=21%
ZHANG_RESPONSE_TO_CANTHARIDIN_DN	ZHANG_RESPONSE_TO_CANTHARIDIN_DN		67	-0.3512357	-1.3310412	0.05485232	0.2461497	1	5150	tags=45%, list=29%, signal=62%
SCHRAMM_INHBA_TARGETS_DN	SCHRAMM_INHBA_TARGETS_DN		23	-0.44367394	-1.3301136	0.115015976	0.24686974	1	2845	tags=30%, list=16%, signal=36%
HWANG_PROSTATE_CANCER_MARKERS	HWANG_PROSTATE_CANCER_MARKERS		25	-0.4419912	-1.3271663	0.1010929	0.25058594	1	371	tags=8%, list=2%, signal=8%
REACTOME_TRANSPORT_OF_GLUCOSE_AND_OTHER_SUGARS_BILE_SALTS_AND_ORGANIC_ACIDS_METAL_IONS_AND_AMINE_COMPOUNDS	REACTOME_TRANSPORT_OF_GLUCOSE_AND_OTHER_SUGARS_BILE_SALTS_AND_ORGANIC_ACIDS_METAL_IONS_AND_AMINE_COMPOUNDS		51	-0.3774715	-1.3265929	0.07720588	0.2508892	1	1115	tags=20%, list=6%, signal=21%
MIKKELSEN_ES_LCP_WITH_H3K4ME3	MIKKELSEN_ES_LCP_WITH_H3K4ME3		77	-0.34802756	-1.3256487	0.043824703	0.25159577	1	1853	tags=22%, list=10%, signal=25%
MARZEC_IL2_SIGNALING_DN	MARZEC_IL2_SIGNALING_DN		31	-0.41313714	-1.3244617	0.089171976	0.25271735	1	3222	tags=42%, list=18%, signal=51%
GOZGIT_ESR1_TARGETS_UP	GOZGIT_ESR1_TARGETS_UP		111	-0.31962496	-1.3241144	0.028708134	0.2526587	1	1232	tags=16%, list=7%, signal=17%
JI_CARCINOGENESIS_BY_KRAS_AND_STK11_DN	JI_CARCINOGENESIS_BY_KRAS_AND_STK11_DN		15	-0.48835558	-1.3238021	0.13076924	0.252524	1	1084	tags=27%, list=6%, signal=28%
GRAESSMANN_APOPTOSIS_BY_SERUM_DEPRIVATION_DN	GRAESSMANN_APOPTOSIS_BY_SERUM_DEPRIVATION_DN		197	-0.29798365	-1.3233179	0.012422361	0.25260296	1	2185	tags=22%, list=12%, signal=25%
LIU_PROSTATE_CANCER_DN	LIU_PROSTATE_CANCER_DN		387	-0.28161094	-1.3226854	0	0.25296664	1	1207	tags=14%, list=7%, signal=15%
LEE_LIVER_CANCER_ACOX1_DN	LEE_LIVER_CANCER_ACOX1_DN		41	-0.38474795	-1.3218682	0.08012821	0.25353673	1	1085	tags=15%, list=6%, signal=16%
HAMAI_APOPTOSIS_VIA_TRAIL_DN	HAMAI_APOPTOSIS_VIA_TRAIL_DN		151	-0.30668214	-1.320329	0.006329114	0.2553864	1	2371	tags=24%, list=13%, signal=27%
KORKOLA_EMBRYONIC_CARCINOMA_VS_SEMINOMA_UP	KORKOLA_EMBRYONIC_CARCINOMA_VS_SEMINOMA_UP		15	-0.48902658	-1.3203082	0.13445379	0.2548439	1	2045	tags=40%, list=11%, signal=45%
LEE_LIVER_CANCER_CIPROFIBRATE_DN	LEE_LIVER_CANCER_CIPROFIBRATE_DN		37	-0.39013788	-1.3177823	0.094339624	0.2579929	1	2096	tags=24%, list=12%, signal=27%
PROVENZANI_METASTASIS_UP	PROVENZANI_METASTASIS_UP		177	-0.30051872	-1.3176556	0.021857923	0.25757834	1	3079	tags=24%, list=17%, signal=28%
STAMBOLSKY_TARGETS_OF_MUTATED_TP53_DN	STAMBOLSKY_TARGETS_OF_MUTATED_TP53_DN		42	-0.38996315	-1.3165109	0.097402595	0.25872093	1	757	tags=21%, list=4%, signal=22%
TOOKER_GEMCITABINE_RESISTANCE_UP	TOOKER_GEMCITABINE_RESISTANCE_UP		73	-0.34044904	-1.3139983	0.05691057	0.26192197	1	1404	tags=15%, list=8%, signal=16%
KEGG_SPLICEOSOME	KEGG_SPLICEOSOME		124	-0.31710967	-1.3138881	0.04568528	0.26149818	1	4833	tags=41%, list=27%, signal=56%
PLASARI_TGFB1_TARGETS_10HR_DN	PLASARI_TGFB1_TARGETS_10HR_DN		212	-0.30227104	-1.3121678	0.008130081	0.26367664	1	2369	tags=24%, list=13%, signal=27%
LIM_MAMMARY_LUMINAL_PROGENITOR_UP	LIM_MAMMARY_LUMINAL_PROGENITOR_UP		37	-0.3872152	-1.3113257	0.07641196	0.26436427	1	2157	tags=32%, list=12%, signal=37%
NABA_BASEMENT_MEMBRANES	NABA_BASEMENT_MEMBRANES		34	-0.4025674	-1.3102466	0.091772154	0.26547754	1	990	tags=24%, list=5%, signal=25%
BYSTRYKH_HEMATOPOIESIS_STEM_CELL_AND_BRAIN_QTL_TRANS	BYSTRYKH_HEMATOPOIESIS_STEM_CELL_AND_BRAIN_QTL_TRANS		163	-0.3045837	-1.3101058	0	0.26510248	1	1849	tags=14%, list=10%, signal=16%
KATSANOU_ELAVL1_TARGETS_DN	KATSANOU_ELAVL1_TARGETS_DN		122	-0.32110673	-1.3099457	0.03314917	0.26477602	1	2371	tags=30%, list=13%, signal=35%
DIRMEIER_LMP1_RESPONSE_LATE_UP	DIRMEIER_LMP1_RESPONSE_LATE_UP		52	-0.3649738	-1.3097196	0.089965396	0.26461717	1	1298	tags=17%, list=7%, signal=19%
GAUSSMANN_MLL_AF4_FUSION_TARGETS_G_UP	GAUSSMANN_MLL_AF4_FUSION_TARGETS_G_UP		169	-0.30596176	-1.3092318	0.01764706	0.26475832	1	2330	tags=21%, list=13%, signal=24%
SASSON_RESPONSE_TO_FORSKOLIN_UP	SASSON_RESPONSE_TO_FORSKOLIN_UP		82	-0.33791488	-1.3090318	0.06334842	0.2644739	1	640	tags=11%, list=4%, signal=11%
GAUSSMANN_MLL_AF4_FUSION_TARGETS_F_UP	GAUSSMANN_MLL_AF4_FUSION_TARGETS_F_UP		163	-0.30346218	-1.3089243	0.040462427	0.2640697	1	1470	tags=18%, list=8%, signal=19%
REACTOME_METABOLISM_OF_NON_CODING_RNA	REACTOME_METABOLISM_OF_NON_CODING_RNA		48	-0.36810288	-1.3084443	0.1056338	0.26423085	1	4155	tags=44%, list=23%, signal=57%
KIM_BIPOLAR_DISORDER_OLIGODENDROCYTE_DENSITY_CORR_DN	KIM_BIPOLAR_DISORDER_OLIGODENDROCYTE_DENSITY_CORR_DN		43	-0.38271376	-1.3040584	0.081911266	0.27033377	1	1633	tags=28%, list=9%, signal=31%
VANTVEER_BREAST_CANCER_ESR1_DN	VANTVEER_BREAST_CANCER_ESR1_DN		196	-0.29800498	-1.3026633	0.006802721	0.27204484	1	2593	tags=24%, list=14%, signal=28%
NIKOLSKY_BREAST_CANCER_16Q24_AMPLICON	NIKOLSKY_BREAST_CANCER_16Q24_AMPLICON		39	-0.38863984	-1.3025	0.077419356	0.27170694	1	2496	tags=31%, list=14%, signal=36%
LEE_LIVER_CANCER_MYC_E2F1_UP	LEE_LIVER_CANCER_MYC_E2F1_UP		40	-0.3849846	-1.3024654	0.068100356	0.27116045	1	2654	tags=35%, list=15%, signal=41%
CHIANG_LIVER_CANCER_SUBCLASS_UNANNOTATED_DN	CHIANG_LIVER_CANCER_SUBCLASS_UNANNOTATED_DN		184	-0.3029042	-1.3022227	0.01898734	0.27095503	1	4208	tags=32%, list=23%, signal=41%
IIZUKA_LIVER_CANCER_PROGRESSION_L0_L1_DN	IIZUKA_LIVER_CANCER_PROGRESSION_L0_L1_DN		21	-0.4408694	-1.300641	0.101604275	0.27289766	1	1829	tags=14%, list=10%, signal=16%
XU_HGF_TARGETS_INDUCED_BY_AKT1_6HR	XU_HGF_TARGETS_INDUCED_BY_AKT1_6HR		18	-0.4524478	-1.2965343	0.14555256	0.2789183	1	1762	tags=28%, list=10%, signal=31%
BOYLAN_MULTIPLE_MYELOMA_PCA3_DN	BOYLAN_MULTIPLE_MYELOMA_PCA3_DN		56	-0.3578419	-1.2964723	0.074204944	0.27842548	1	1846	tags=23%, list=10%, signal=26%
WANG_CLIM2_TARGETS_UP	WANG_CLIM2_TARGETS_UP		213	-0.29032904	-1.2954963	0.006289308	0.27948114	1	2729	tags=22%, list=15%, signal=26%
KEGG_LYSINE_DEGRADATION	KEGG_LYSINE_DEGRADATION		43	-0.378265	-1.2950742	0.09271523	0.27948913	1	3917	tags=33%, list=22%, signal=41%
REACTOME_LIPOPROTEIN_METABOLISM	REACTOME_LIPOPROTEIN_METABOLISM		17	-0.46704414	-1.2943702	0.12362637	0.280031	1	224	tags=18%, list=1%, signal=18%
CAVARD_LIVER_CANCER_MALIGNANT_VS_BENIGN	CAVARD_LIVER_CANCER_MALIGNANT_VS_BENIGN		20	-0.44780478	-1.2941638	0.13218391	0.2797879	1	507	tags=10%, list=3%, signal=10%
NAGASHIMA_NRG1_SIGNALING_DN	NAGASHIMA_NRG1_SIGNALING_DN		50	-0.36085746	-1.2931707	0.08896797	0.2807085	1	3036	tags=32%, list=17%, signal=38%
ACOSTA_PROLIFERATION_INDEPENDENT_MYC_TARGETS_UP	ACOSTA_PROLIFERATION_INDEPENDENT_MYC_TARGETS_UP		74	-0.33782676	-1.291002	0.07335907	0.2835609	1	4519	tags=36%, list=25%, signal=48%
MAGRANGEAS_MULTIPLE_MYELOMA_IGG_VS_IGA_UP	MAGRANGEAS_MULTIPLE_MYELOMA_IGG_VS_IGA_UP		19	-0.45122847	-1.2905102	0.16066483	0.28375968	1	1698	tags=32%, list=9%, signal=35%
PID_FOXM1_PATHWAY	PID_FOXM1_PATHWAY		36	-0.3936333	-1.2901211	0.11212121	0.2837755	1	2098	tags=44%, list=12%, signal=50%
MILI_PSEUDOPODIA_HAPTOTAXIS_UP	MILI_PSEUDOPODIA_HAPTOTAXIS_UP		499	-0.26655006	-1.2881773	0	0.28641436	1	4375	tags=32%, list=24%, signal=41%
MARIADASON_RESPONSE_TO_BUTYRATE_SULINDAC_6	MARIADASON_RESPONSE_TO_BUTYRATE_SULINDAC_6		45	-0.37225306	-1.2880687	0.10576923	0.2859947	1	3072	tags=38%, list=17%, signal=45%
NAKAYAMA_SOFT_TISSUE_TUMORS_PCA2_DN	NAKAYAMA_SOFT_TISSUE_TUMORS_PCA2_DN		47	-0.3674611	-1.2879518	0.088435374	0.2855589	1	724	tags=17%, list=4%, signal=18%
GARGALOVIC_RESPONSE_TO_OXIDIZED_PHOSPHOLIPIDS_GREEN_DN	GARGALOVIC_RESPONSE_TO_OXIDIZED_PHOSPHOLIPIDS_GREEN_DN		23	-0.42398852	-1.2877663	0.13826367	0.28526798	1	1351	tags=22%, list=7%, signal=23%
DAUER_STAT3_TARGETS_DN	DAUER_STAT3_TARGETS_DN		46	-0.36825392	-1.286791	0.10631229	0.28635755	1	1373	tags=17%, list=8%, signal=19%
KEGG_DRUG_METABOLISM_CYTOCHROME_P450	KEGG_DRUG_METABOLISM_CYTOCHROME_P450		25	-0.41660538	-1.286108	0.12571429	0.28686965	1	2021	tags=28%, list=11%, signal=31%
PID_TOLL_ENDOGENOUS_PATHWAY	PID_TOLL_ENDOGENOUS_PATHWAY		21	-0.43070084	-1.2849327	0.1450151	0.28816494	1	2266	tags=29%, list=13%, signal=33%
PICCALUGA_ANGIOIMMUNOBLASTIC_LYMPHOMA_UP	PICCALUGA_ANGIOIMMUNOBLASTIC_LYMPHOMA_UP		171	-0.29527915	-1.2833697	0.017045455	0.29008597	1	1198	tags=16%, list=7%, signal=17%
SANSOM_APC_TARGETS	SANSOM_APC_TARGETS		166	-0.29968068	-1.2831374	0.010256411	0.28988817	1	2731	tags=25%, list=15%, signal=29%
KEGG_PYRIMIDINE_METABOLISM	KEGG_PYRIMIDINE_METABOLISM		90	-0.32216728	-1.2830341	0.059322033	0.2894842	1	3532	tags=33%, list=20%, signal=41%
KEGG_METABOLISM_OF_XENOBIOTICS_BY_CYTOCHROME_P450	KEGG_METABOLISM_OF_XENOBIOTICS_BY_CYTOCHROME_P450		26	-0.42581984	-1.2825137	0.11818182	0.28971174	1	2021	tags=27%, list=11%, signal=30%
LIEN_BREAST_CARCINOMA_METAPLASTIC_VS_DUCTAL_DN	LIEN_BREAST_CARCINOMA_METAPLASTIC_VS_DUCTAL_DN		72	-0.34218335	-1.281255	0.09411765	0.29125804	1	2433	tags=32%, list=13%, signal=37%
KENNY_CTNNB1_TARGETS_UP	KENNY_CTNNB1_TARGETS_UP		43	-0.36965558	-1.2800511	0.08510638	0.29261765	1	2947	tags=33%, list=16%, signal=39%
BILD_E2F3_ONCOGENIC_SIGNATURE	BILD_E2F3_ONCOGENIC_SIGNATURE		220	-0.28618166	-1.2772133	0	0.2968609	1	2640	tags=25%, list=15%, signal=29%
BROWNE_INTERFERON_RESPONSIVE_GENES	BROWNE_INTERFERON_RESPONSIVE_GENES		59	-0.35024324	-1.27571	0.086792454	0.29895094	1	1206	tags=19%, list=7%, signal=20%
MOOTHA_GLYCOGEN_METABOLISM	MOOTHA_GLYCOGEN_METABOLISM		18	-0.4468024	-1.2745694	0.1827957	0.30022177	1	818	tags=17%, list=5%, signal=17%
PID_EPHA_FWDPATHWAY	PID_EPHA_FWDPATHWAY		24	-0.43067163	-1.2742733	0.14873418	0.30013174	1	325	tags=13%, list=2%, signal=13%
BECKER_TAMOXIFEN_RESISTANCE_UP	BECKER_TAMOXIFEN_RESISTANCE_UP		44	-0.3611658	-1.2730688	0.09967846	0.30163074	1	1345	tags=20%, list=7%, signal=22%
MORI_EMU_MYC_LYMPHOMA_BY_ONSET_TIME_DN	MORI_EMU_MYC_LYMPHOMA_BY_ONSET_TIME_DN		16	-0.46737617	-1.2727661	0.14016172	0.301542	1	1665	tags=19%, list=9%, signal=21%
FAELT_B_CLL_WITH_VH3_21_DN	FAELT_B_CLL_WITH_VH3_21_DN		48	-0.3685084	-1.2725835	0.13915858	0.30125234	1	2568	tags=23%, list=14%, signal=27%
FIGUEROA_AML_METHYLATION_CLUSTER_7_UP	FIGUEROA_AML_METHYLATION_CLUSTER_7_UP		95	-0.32100305	-1.2725086	0.06530612	0.30076262	1	1553	tags=15%, list=9%, signal=16%
LEE_METASTASIS_AND_RNA_PROCESSING_UP	LEE_METASTASIS_AND_RNA_PROCESSING_UP		17	-0.46607336	-1.2724653	0.14240506	0.30024648	1	6136	tags=71%, list=34%, signal=107%
ROZANOV_MMP14_TARGETS_UP	ROZANOV_MMP14_TARGETS_UP		231	-0.28028277	-1.2720929	0	0.30028418	1	2207	tags=19%, list=12%, signal=22%
PEART_HDAC_PROLIFERATION_CLUSTER_UP	PEART_HDAC_PROLIFERATION_CLUSTER_UP		57	-0.34979263	-1.2716827	0.10074627	0.3002879	1	3478	tags=37%, list=19%, signal=45%
LEE_LIVER_CANCER_E2F1_UP	LEE_LIVER_CANCER_E2F1_UP		48	-0.36487648	-1.271377	0.11744966	0.30018124	1	2363	tags=29%, list=13%, signal=33%
PID_RHOA_REG_PATHWAY	PID_RHOA_REG_PATHWAY		40	-0.3659959	-1.269073	0.11214953	0.30356422	1	2612	tags=30%, list=14%, signal=35%
KEGG_CELL_CYCLE	KEGG_CELL_CYCLE		120	-0.31027994	-1.2687199	0.051948052	0.3036114	1	2967	tags=33%, list=16%, signal=39%
VANTVEER_BREAST_CANCER_POOR_PROGNOSIS	VANTVEER_BREAST_CANCER_POOR_PROGNOSIS		46	-0.36677992	-1.2681233	0.1331058	0.30396459	1	2148	tags=30%, list=12%, signal=34%
KEGG_ABC_TRANSPORTERS	KEGG_ABC_TRANSPORTERS		36	-0.38380143	-1.2677135	0.14071856	0.30407688	1	1186	tags=17%, list=7%, signal=18%
KEGG_BUTANOATE_METABOLISM	KEGG_BUTANOATE_METABOLISM		27	-0.40052027	-1.2675942	0.13513513	0.30366048	1	1924	tags=26%, list=11%, signal=29%
ZHAN_MULTIPLE_MYELOMA_MF_DN	ZHAN_MULTIPLE_MYELOMA_MF_DN		35	-0.37885863	-1.2666485	0.13677812	0.30483708	1	3870	tags=31%, list=21%, signal=40%
LIM_MAMMARY_STEM_CELL_DN	LIM_MAMMARY_STEM_CELL_DN		358	-0.26810202	-1.2658956	0	0.30562973	1	2587	tags=24%, list=14%, signal=27%
SMID_BREAST_CANCER_RELAPSE_IN_LUNG_UP	SMID_BREAST_CANCER_RELAPSE_IN_LUNG_UP		15	-0.4741597	-1.2655745	0.15869017	0.3055416	1	1051	tags=20%, list=6%, signal=21%
REACTOME_ABCA_TRANSPORTERS_IN_LIPID_HOMEOSTASIS	REACTOME_ABCA_TRANSPORTERS_IN_LIPID_HOMEOSTASIS		15	-0.47174415	-1.2613007	0.18518518	0.3123706	1	2857	tags=27%, list=16%, signal=32%
GROSS_HYPOXIA_VIA_ELK3_AND_HIF1A_DN	GROSS_HYPOXIA_VIA_ELK3_AND_HIF1A_DN		99	-0.31320363	-1.2612855	0.07174888	0.3117895	1	1747	tags=16%, list=10%, signal=18%
KOYAMA_SEMA3B_TARGETS_DN	KOYAMA_SEMA3B_TARGETS_DN		356	-0.26772046	-1.2604548	0	0.3125857	1	1846	tags=17%, list=10%, signal=18%
HU_GENOTOXIN_ACTION_DIRECT_VS_INDIRECT_24HR	HU_GENOTOXIN_ACTION_DIRECT_VS_INDIRECT_24HR		49	-0.35999885	-1.2603377	0.11956522	0.31219304	1	2280	tags=27%, list=13%, signal=30%
MORI_MATURE_B_LYMPHOCYTE_UP	MORI_MATURE_B_LYMPHOCYTE_UP		73	-0.32475773	-1.2592467	0.0952381	0.3135058	1	2447	tags=21%, list=14%, signal=24%
SERVITJA_LIVER_HNF1A_TARGETS_UP	SERVITJA_LIVER_HNF1A_TARGETS_UP		111	-0.3106778	-1.2572116	0.06451613	0.31647342	1	2516	tags=32%, list=14%, signal=37%
GAVIN_FOXP3_TARGETS_CLUSTER_P4	GAVIN_FOXP3_TARGETS_CLUSTER_P4		76	-0.32473066	-1.2553371	0.08778626	0.31903872	1	1996	tags=24%, list=11%, signal=27%
VANTVEER_BREAST_CANCER_BRCA1_DN	VANTVEER_BREAST_CANCER_BRCA1_DN		38	-0.371136	-1.2549645	0.12703583	0.319101	1	2259	tags=24%, list=13%, signal=27%
LIAO_HAVE_SOX4_BINDING_SITES	LIAO_HAVE_SOX4_BINDING_SITES		37	-0.37661123	-1.2529852	0.14375	0.32203716	1	2581	tags=32%, list=14%, signal=38%
VERHAAK_GLIOBLASTOMA_MESENCHYMAL	VERHAAK_GLIOBLASTOMA_MESENCHYMAL		179	-0.2880937	-1.2503892	0.05487805	0.32616732	1	1499	tags=18%, list=8%, signal=19%
BIOCARTA_MYOSIN_PATHWAY	BIOCARTA_MYOSIN_PATHWAY		26	-0.4081877	-1.2482011	0.16056338	0.3295465	1	2374	tags=27%, list=13%, signal=31%
KEGG_NITROGEN_METABOLISM	KEGG_NITROGEN_METABOLISM		15	-0.47136346	-1.2469963	0.17867436	0.33119547	1	1584	tags=27%, list=9%, signal=29%
DAIRKEE_TERT_TARGETS_UP	DAIRKEE_TERT_TARGETS_UP		339	-0.26780432	-1.2465343	0.024390243	0.33139703	1	3002	tags=19%, list=17%, signal=23%
REACTOME_REGULATION_OF_HYPOXIA_INDUCIBLE_FACTOR_HIF_BY_OXYGEN	REACTOME_REGULATION_OF_HYPOXIA_INDUCIBLE_FACTOR_HIF_BY_OXYGEN		22	-0.42578512	-1.2454083	0.1433121	0.33286396	1	217	tags=9%, list=1%, signal=9%
BREDEMEYER_RAG_SIGNALING_NOT_VIA_ATM_DN	BREDEMEYER_RAG_SIGNALING_NOT_VIA_ATM_DN		48	-0.34485626	-1.245162	0.12627986	0.33271015	1	908	tags=17%, list=5%, signal=18%
REACTOME_ASSEMBLY_OF_THE_PRE_REPLICATIVE_COMPLEX	REACTOME_ASSEMBLY_OF_THE_PRE_REPLICATIVE_COMPLEX		62	-0.3345191	-1.2451376	0.11721612	0.33211675	1	4451	tags=32%, list=25%, signal=43%
OUELLET_OVARIAN_CANCER_INVASIVE_VS_LMP_UP	OUELLET_OVARIAN_CANCER_INVASIVE_VS_LMP_UP		115	-0.30174077	-1.2444302	0.046728972	0.33280304	1	4615	tags=33%, list=26%, signal=44%
FERRANDO_T_ALL_WITH_MLL_ENL_FUSION_DN	FERRANDO_T_ALL_WITH_MLL_ENL_FUSION_DN		81	-0.32211587	-1.243568	0.08394161	0.3338062	1	3819	tags=40%, list=21%, signal=50%
MARCHINI_TRABECTEDIN_RESISTANCE_UP	MARCHINI_TRABECTEDIN_RESISTANCE_UP		19	-0.44168812	-1.2429817	0.18285714	0.3342496	1	621	tags=11%, list=3%, signal=11%
PEREZ_TP53_AND_TP63_TARGETS	PEREZ_TP53_AND_TP63_TARGETS		174	-0.284157	-1.2407656	0.04109589	0.33768046	1	2142	tags=22%, list=12%, signal=25%
KANNAN_TP53_TARGETS_DN	KANNAN_TP53_TARGETS_DN		21	-0.41830623	-1.2399539	0.1859155	0.33854106	1	3368	tags=48%, list=19%, signal=58%
REACTOME_FACTORS_INVOLVED_IN_MEGAKARYOCYTE_DEVELOPMENT_AND_PLATELET_PRODUCTION	REACTOME_FACTORS_INVOLVED_IN_MEGAKARYOCYTE_DEVELOPMENT_AND_PLATELET_PRODUCTION		105	-0.3008098	-1.2380996	0.067510545	0.34130156	1	2430	tags=29%, list=13%, signal=33%
LEE_TARGETS_OF_PTCH1_AND_SUFU_UP	LEE_TARGETS_OF_PTCH1_AND_SUFU_UP		45	-0.3606704	-1.2378892	0.12871288	0.34107524	1	3250	tags=38%, list=18%, signal=46%
MILI_PSEUDOPODIA_CHEMOTAXIS_UP	MILI_PSEUDOPODIA_CHEMOTAXIS_UP		68	-0.32984707	-1.2378863	0.09019608	0.34043774	1	3072	tags=31%, list=17%, signal=37%
BILANGES_SERUM_SENSITIVE_GENES	BILANGES_SERUM_SENSITIVE_GENES		74	-0.32458395	-1.2370012	0.072961375	0.3414509	1	1926	tags=19%, list=11%, signal=21%
BRACHAT_RESPONSE_TO_METHOTREXATE_DN	BRACHAT_RESPONSE_TO_METHOTREXATE_DN		26	-0.40114492	-1.23536	0.17065868	0.34390894	1	3756	tags=38%, list=21%, signal=49%
ZHAN_MULTIPLE_MYELOMA_CD1_VS_CD2_DN	ZHAN_MULTIPLE_MYELOMA_CD1_VS_CD2_DN		40	-0.36209375	-1.2343589	0.14935064	0.34512353	1	1835	tags=28%, list=10%, signal=31%
REACTOME_TRANSMEMBRANE_TRANSPORT_OF_SMALL_MOLECULES	REACTOME_TRANSMEMBRANE_TRANSPORT_OF_SMALL_MOLECULES		288	-0.26694816	-1.2338047	0.028846154	0.34553602	1	1319	tags=11%, list=7%, signal=12%
MOREAUX_B_LYMPHOCYTE_MATURATION_BY_TACI_UP	MOREAUX_B_LYMPHOCYTE_MATURATION_BY_TACI_UP		67	-0.3244723	-1.2301555	0.08943089	0.3519605	1	1140	tags=16%, list=6%, signal=17%
DELPUECH_FOXO3_TARGETS_DN	DELPUECH_FOXO3_TARGETS_DN		38	-0.3560633	-1.2280082	0.13879004	0.35547206	1	3530	tags=45%, list=20%, signal=56%
KEGG_FC_EPSILON_RI_SIGNALING_PATHWAY	KEGG_FC_EPSILON_RI_SIGNALING_PATHWAY		56	-0.3305791	-1.2273889	0.12587413	0.35600507	1	2478	tags=21%, list=14%, signal=25%
REACTOME_INHIBITION_OF_THE_PROTEOLYTIC_ACTIVITY_OF_APC_C_REQUIRED_FOR_THE_ONSET_OF_ANAPHASE_BY_MITOTIC_SPINDLE_CHECKPOINT_COMPONENTS	REACTOME_INHIBITION_OF_THE_PROTEOLYTIC_ACTIVITY_OF_APC_C_REQUIRED_FOR_THE_ONSET_OF_ANAPHASE_BY_MITOTIC_SPINDLE_CHECKPOINT_COMPONENTS		18	-0.44200116	-1.2267823	0.2044818	0.35652146	1	2342	tags=28%, list=13%, signal=32%
SMID_BREAST_CANCER_LUMINAL_B_UP	SMID_BREAST_CANCER_LUMINAL_B_UP		139	-0.2893699	-1.2258012	0.038251366	0.3577587	1	2596	tags=27%, list=14%, signal=32%
AMBROSINI_FLAVOPIRIDOL_TREATMENT_TP53	AMBROSINI_FLAVOPIRIDOL_TREATMENT_TP53		97	-0.30320653	-1.2243879	0.07234043	0.3597595	1	3060	tags=27%, list=17%, signal=32%
CHYLA_CBFA2T3_TARGETS_UP	CHYLA_CBFA2T3_TARGETS_UP		285	-0.26824716	-1.223779	0.00862069	0.36020377	1	1513	tags=14%, list=8%, signal=15%
REACTOME_GLYCEROPHOSPHOLIPID_BIOSYNTHESIS	REACTOME_GLYCEROPHOSPHOLIPID_BIOSYNTHESIS		70	-0.3225089	-1.2236501	0.08130081	0.35977942	1	2261	tags=20%, list=13%, signal=23%
CROMER_TUMORIGENESIS_DN	CROMER_TUMORIGENESIS_DN		26	-0.39895415	-1.2227014	0.1884058	0.3610243	1	1440	tags=19%, list=8%, signal=21%
KOKKINAKIS_METHIONINE_DEPRIVATION_48HR_DN	KOKKINAKIS_METHIONINE_DEPRIVATION_48HR_DN		59	-0.3327289	-1.2225133	0.1418919	0.36073816	1	2713	tags=29%, list=15%, signal=34%
VALK_AML_CLUSTER_13	VALK_AML_CLUSTER_13		27	-0.39023972	-1.2221096	0.15853658	0.3608256	1	1532	tags=15%, list=8%, signal=16%
GOLDRATH_HOMEOSTATIC_PROLIFERATION	GOLDRATH_HOMEOSTATIC_PROLIFERATION		162	-0.28462815	-1.2194822	0.05625	0.36537609	1	2367	tags=14%, list=13%, signal=16%
SU_LIVER	SU_LIVER		18	-0.44221178	-1.2187557	0.20170455	0.36609703	1	1584	tags=22%, list=9%, signal=24%
KEGG_AXON_GUIDANCE	KEGG_AXON_GUIDANCE		120	-0.29464942	-1.2180703	0.050925925	0.3666515	1	1527	tags=18%, list=8%, signal=19%
CHIANG_LIVER_CANCER_SUBCLASS_CTNNB1_UP	CHIANG_LIVER_CANCER_SUBCLASS_CTNNB1_UP		133	-0.292815	-1.2171413	0.06965174	0.36786503	1	1733	tags=19%, list=10%, signal=21%
CERVERA_SDHB_TARGETS_1_UP	CERVERA_SDHB_TARGETS_1_UP		95	-0.30967125	-1.2171041	0.0996016	0.3672739	1	1889	tags=23%, list=10%, signal=26%
WOTTON_RUNX_TARGETS_UP	WOTTON_RUNX_TARGETS_UP		16	-0.44809303	-1.2166605	0.19476745	0.36753118	1	1017	tags=19%, list=6%, signal=20%
COLLER_MYC_TARGETS_UP	COLLER_MYC_TARGETS_UP		24	-0.41373086	-1.2140177	0.18670887	0.37218398	1	3929	tags=33%, list=22%, signal=43%
GINESTIER_BREAST_CANCER_20Q13_AMPLIFICATION_DN	GINESTIER_BREAST_CANCER_20Q13_AMPLIFICATION_DN		154	-0.28699172	-1.2135972	0.06395349	0.37237084	1	3753	tags=27%, list=21%, signal=33%
TARTE_PLASMA_CELL_VS_PLASMABLAST_DN	TARTE_PLASMA_CELL_VS_PLASMABLAST_DN		292	-0.26483423	-1.2131691	0.05102041	0.37260434	1	4185	tags=36%, list=23%, signal=47%
HARRIS_BRAIN_CANCER_PROGENITORS	HARRIS_BRAIN_CANCER_PROGENITORS		30	-0.385065	-1.2120428	0.20114942	0.374201	1	2724	tags=27%, list=15%, signal=31%
ZHAN_MULTIPLE_MYELOMA_SPIKED	ZHAN_MULTIPLE_MYELOMA_SPIKED		15	-0.44599745	-1.2117553	0.21022727	0.37411755	1	1192	tags=20%, list=7%, signal=21%
CHIANG_LIVER_CANCER_SUBCLASS_INTERFERON_UP	CHIANG_LIVER_CANCER_SUBCLASS_INTERFERON_UP		15	-0.44638002	-1.2112894	0.23809524	0.37438488	1	1987	tags=27%, list=11%, signal=30%
LIU_NASOPHARYNGEAL_CARCINOMA	LIU_NASOPHARYNGEAL_CARCINOMA		60	-0.33297044	-1.211246	0.15730338	0.37382382	1	2447	tags=20%, list=14%, signal=23%
BIOCARTA_MPR_PATHWAY	BIOCARTA_MPR_PATHWAY		31	-0.3801104	-1.2105148	0.19292605	0.37462127	1	2098	tags=19%, list=12%, signal=22%
DUTERTRE_ESTRADIOL_RESPONSE_6HR_UP	DUTERTRE_ESTRADIOL_RESPONSE_6HR_UP		209	-0.26837295	-1.2105039	0.073619634	0.37397337	1	2721	tags=29%, list=15%, signal=34%
GNATENKO_PLATELET_SIGNATURE	GNATENKO_PLATELET_SIGNATURE		40	-0.3604544	-1.2083191	0.17525773	0.37772906	1	1430	tags=18%, list=8%, signal=19%
NIKOLSKY_BREAST_CANCER_7P22_AMPLICON	NIKOLSKY_BREAST_CANCER_7P22_AMPLICON		31	-0.37040448	-1.2081226	0.19314642	0.37745294	1	2375	tags=19%, list=13%, signal=22%
MIKKELSEN_MEF_LCP_WITH_H3K4ME3	MIKKELSEN_MEF_LCP_WITH_H3K4ME3		97	-0.30425417	-1.2078353	0.09389672	0.37744603	1	1853	tags=21%, list=10%, signal=23%
TIMOFEEVA_GROWTH_STRESS_VIA_STAT1_DN	TIMOFEEVA_GROWTH_STRESS_VIA_STAT1_DN		15	-0.4379878	-1.207346	0.22629969	0.3777081	1	49	tags=7%, list=0%, signal=7%
LEE_LIVER_CANCER_DENA_UP	LEE_LIVER_CANCER_DENA_UP		44	-0.36031887	-1.2071116	0.18412699	0.3774913	1	1884	tags=25%, list=10%, signal=28%
REACTOME_RESOLUTION_OF_AP_SITES_VIA_THE_MULTIPLE_NUCLEOTIDE_PATCH_REPLACEMENT_PATHWAY	REACTOME_RESOLUTION_OF_AP_SITES_VIA_THE_MULTIPLE_NUCLEOTIDE_PATCH_REPLACEMENT_PATHWAY		16	-0.4447119	-1.2062868	0.21929824	0.37839288	1	4836	tags=63%, list=27%, signal=85%
ENK_UV_RESPONSE_EPIDERMIS_UP	ENK_UV_RESPONSE_EPIDERMIS_UP		251	-0.26602593	-1.2054917	0.040650405	0.37934333	1	2484	tags=20%, list=14%, signal=22%
HUANG_FOXA2_TARGETS_DN	HUANG_FOXA2_TARGETS_DN		30	-0.38436028	-1.2054441	0.18238993	0.37876892	1	859	tags=20%, list=5%, signal=21%
CORRE_MULTIPLE_MYELOMA_DN	CORRE_MULTIPLE_MYELOMA_DN		46	-0.34792337	-1.2047702	0.15	0.3794597	1	2533	tags=37%, list=14%, signal=43%
MATZUK_SPERMATID_DIFFERENTIATION	MATZUK_SPERMATID_DIFFERENTIATION		27	-0.38641486	-1.2034708	0.17714286	0.38137403	1	3224	tags=37%, list=18%, signal=45%
AMUNDSON_POOR_SURVIVAL_AFTER_GAMMA_RADIATION_8G	AMUNDSON_POOR_SURVIVAL_AFTER_GAMMA_RADIATION_8G		82	-0.30347857	-1.2030641	0.12033195	0.38157013	1	2654	tags=30%, list=15%, signal=36%
REACTOME_CHONDROITIN_SULFATE_DERMATAN_SULFATE_METABOLISM	REACTOME_CHONDROITIN_SULFATE_DERMATAN_SULFATE_METABOLISM		41	-0.35700768	-1.2020471	0.17857143	0.38309255	1	1805	tags=27%, list=10%, signal=30%
SOTIRIOU_BREAST_CANCER_GRADE_1_VS_3_DN	SOTIRIOU_BREAST_CANCER_GRADE_1_VS_3_DN		50	-0.3407208	-1.2018418	0.17518248	0.38280985	1	1827	tags=20%, list=10%, signal=22%
JEON_SMAD6_TARGETS_DN	JEON_SMAD6_TARGETS_DN		18	-0.43300042	-1.2010767	0.20231214	0.3836078	1	1678	tags=39%, list=9%, signal=43%
HONRADO_BREAST_CANCER_BRCA1_VS_BRCA2	HONRADO_BREAST_CANCER_BRCA1_VS_BRCA2		16	-0.44848737	-1.200992	0.22816901	0.38310125	1	2902	tags=44%, list=16%, signal=52%
REACTOME_NCAM_SIGNALING_FOR_NEURITE_OUT_GROWTH	REACTOME_NCAM_SIGNALING_FOR_NEURITE_OUT_GROWTH		57	-0.32367802	-1.1990094	0.125	0.38657975	1	1865	tags=18%, list=10%, signal=20%
GAUSSMANN_MLL_AF4_FUSION_TARGETS_C_UP	GAUSSMANN_MLL_AF4_FUSION_TARGETS_C_UP		154	-0.28084087	-1.1984668	0.07692308	0.38704965	1	2222	tags=17%, list=12%, signal=19%
NOJIMA_SFRP2_TARGETS_DN	NOJIMA_SFRP2_TARGETS_DN		19	-0.4152584	-1.198425	0.21652421	0.38647372	1	2195	tags=21%, list=12%, signal=24%
WORSCHECH_TUMOR_REJECTION_UP	WORSCHECH_TUMOR_REJECTION_UP		28	-0.3757565	-1.1978575	0.16040955	0.3870453	1	787	tags=14%, list=4%, signal=15%
VERRECCHIA_DELAYED_RESPONSE_TO_TGFB1	VERRECCHIA_DELAYED_RESPONSE_TO_TGFB1		36	-0.36064583	-1.1968516	0.16242038	0.3883645	1	1906	tags=31%, list=11%, signal=34%
HSIAO_LIVER_SPECIFIC_GENES	HSIAO_LIVER_SPECIFIC_GENES		133	-0.28227097	-1.195061	0.07253886	0.39137203	1	1690	tags=14%, list=9%, signal=16%
BURTON_ADIPOGENESIS_4	BURTON_ADIPOGENESIS_4		43	-0.35171825	-1.1949605	0.20761245	0.3908922	1	3416	tags=26%, list=19%, signal=31%
MULLIGHAN_NPM1_SIGNATURE_3_DN	MULLIGHAN_NPM1_SIGNATURE_3_DN		138	-0.2840358	-1.1948459	0.0964467	0.39045283	1	1186	tags=12%, list=7%, signal=12%
BHAT_ESR1_TARGETS_VIA_AKT1_DN	BHAT_ESR1_TARGETS_VIA_AKT1_DN		71	-0.3122924	-1.194575	0.16064256	0.39030093	1	1814	tags=23%, list=10%, signal=25%
RUAN_RESPONSE_TO_TNF_DN	RUAN_RESPONSE_TO_TNF_DN		70	-0.3093724	-1.1935346	0.1268116	0.39183274	1	3015	tags=24%, list=17%, signal=29%
IZADPANAH_STEM_CELL_ADIPOSE_VS_BONE_DN	IZADPANAH_STEM_CELL_ADIPOSE_VS_BONE_DN		88	-0.30451012	-1.1932926	0.13076924	0.3916849	1	1872	tags=20%, list=10%, signal=23%
GRAESSMANN_RESPONSE_TO_MC_AND_SERUM_DEPRIVATION_DN	GRAESSMANN_RESPONSE_TO_MC_AND_SERUM_DEPRIVATION_DN		72	-0.30869058	-1.1927549	0.14107884	0.39217705	1	2185	tags=25%, list=12%, signal=28%
ELVIDGE_HIF1A_TARGETS_DN	ELVIDGE_HIF1A_TARGETS_DN		83	-0.30551857	-1.1920452	0.12195122	0.39299208	1	2812	tags=35%, list=16%, signal=41%
MULLIGHAN_NPM1_MUTATED_SIGNATURE_1_DN	MULLIGHAN_NPM1_MUTATED_SIGNATURE_1_DN		107	-0.2948944	-1.1914918	0.14622642	0.39352694	1	866	tags=10%, list=5%, signal=11%
REACTOME_PRE_NOTCH_EXPRESSION_AND_PROCESSING	REACTOME_PRE_NOTCH_EXPRESSION_AND_PROCESSING		37	-0.3567805	-1.1900487	0.19254659	0.3958369	1	562	tags=11%, list=3%, signal=11%
NIKOLSKY_BREAST_CANCER_20Q12_Q13_AMPLICON	NIKOLSKY_BREAST_CANCER_20Q12_Q13_AMPLICON		105	-0.29299286	-1.18936	0.11790393	0.39658162	1	3290	tags=21%, list=18%, signal=25%
GUO_HEX_TARGETS_DN	GUO_HEX_TARGETS_DN		50	-0.32905957	-1.1881284	0.17028986	0.3986384	1	584	tags=12%, list=3%, signal=12%
WINTER_HYPOXIA_UP	WINTER_HYPOXIA_UP		85	-0.31075135	-1.1863654	0.14901961	0.40158224	1	3202	tags=26%, list=18%, signal=31%
PID_EPHB_FWD_PATHWAY	PID_EPHB_FWD_PATHWAY		38	-0.35777247	-1.1860548	0.21245421	0.40160924	1	1527	tags=21%, list=8%, signal=23%
KEGG_PROGESTERONE_MEDIATED_OOCYTE_MATURATION	KEGG_PROGESTERONE_MEDIATED_OOCYTE_MATURATION		74	-0.31021446	-1.1842372	0.14716981	0.40491223	1	4158	tags=38%, list=23%, signal=49%
BOYAULT_LIVER_CANCER_SUBCLASS_G1_UP	BOYAULT_LIVER_CANCER_SUBCLASS_G1_UP		103	-0.29661822	-1.1833766	0.13592233	0.40615618	1	3335	tags=26%, list=18%, signal=32%
BALDWIN_PRKCI_TARGETS_UP	BALDWIN_PRKCI_TARGETS_UP		29	-0.3791214	-1.1813736	0.23728813	0.4096709	1	3018	tags=31%, list=17%, signal=37%
WEIGEL_OXIDATIVE_STRESS_BY_HNE_AND_TBH	WEIGEL_OXIDATIVE_STRESS_BY_HNE_AND_TBH		53	-0.33150756	-1.1805133	0.17525773	0.41088152	1	1421	tags=15%, list=8%, signal=16%
SCHEIDEREIT_IKK_INTERACTING_PROTEINS	SCHEIDEREIT_IKK_INTERACTING_PROTEINS		52	-0.33341256	-1.1780323	0.18181819	0.41559437	1	1517	tags=12%, list=8%, signal=13%
VALK_AML_CLUSTER_6	VALK_AML_CLUSTER_6		25	-0.39246652	-1.1775305	0.22713864	0.41600484	1	2007	tags=24%, list=11%, signal=27%
CHYLA_CBFA2T3_TARGETS_DN	CHYLA_CBFA2T3_TARGETS_DN		187	-0.2670349	-1.1774884	0.08695652	0.41543573	1	2814	tags=28%, list=16%, signal=33%
MATZUK_SPERMATOZOA	MATZUK_SPERMATOZOA		86	-0.295629	-1.1772397	0.125	0.4152668	1	2979	tags=31%, list=17%, signal=37%
CADWELL_ATG16L1_TARGETS_UP	CADWELL_ATG16L1_TARGETS_UP		51	-0.32688254	-1.1769824	0.17064847	0.41512844	1	1669	tags=20%, list=9%, signal=22%
JIANG_VHL_TARGETS	JIANG_VHL_TARGETS		129	-0.2811994	-1.176186	0.12105263	0.4162201	1	3570	tags=28%, list=20%, signal=35%
SHEN_SMARCA2_TARGETS_DN	SHEN_SMARCA2_TARGETS_DN		186	-0.2676087	-1.1759627	0.09929078	0.41607895	1	2392	tags=22%, list=13%, signal=25%
SHETH_LIVER_CANCER_VS_TXNIP_LOSS_PAM5	SHETH_LIVER_CANCER_VS_TXNIP_LOSS_PAM5		69	-0.31071904	-1.1746616	0.1495327	0.41818064	1	1669	tags=23%, list=9%, signal=25%
REACTOME_SIGNALING_BY_RHO_GTPASES	REACTOME_SIGNALING_BY_RHO_GTPASES		100	-0.29308394	-1.1737198	0.1146789	0.41961083	1	2288	tags=22%, list=13%, signal=25%
DER_IFN_BETA_RESPONSE_UP	DER_IFN_BETA_RESPONSE_UP		97	-0.28950033	-1.1733913	0.12727273	0.41971147	1	2728	tags=18%, list=15%, signal=21%
ALONSO_METASTASIS_EMT_UP	ALONSO_METASTASIS_EMT_UP		29	-0.37504825	-1.1733027	0.24600638	0.41920725	1	1815	tags=24%, list=10%, signal=27%
BOGNI_TREATMENT_RELATED_MYELOID_LEUKEMIA_UP	BOGNI_TREATMENT_RELATED_MYELOID_LEUKEMIA_UP		26	-0.38593453	-1.1730306	0.21661721	0.4191179	1	1137	tags=15%, list=6%, signal=16%
DELACROIX_RAR_BOUND_ES	DELACROIX_RAR_BOUND_ES		360	-0.24647656	-1.1726679	0.04347826	0.4192763	1	2226	tags=18%, list=12%, signal=20%
PARK_TRETINOIN_RESPONSE_AND_PML_RARA_FUSION	PARK_TRETINOIN_RESPONSE_AND_PML_RARA_FUSION		23	-0.393873	-1.1724771	0.21492538	0.4189394	1	1908	tags=30%, list=11%, signal=34%
BILANGES_RAPAMYCIN_SENSITIVE_VIA_TSC1_AND_TSC2	BILANGES_RAPAMYCIN_SENSITIVE_VIA_TSC1_AND_TSC2		70	-0.31278205	-1.1724669	0.17857143	0.41828454	1	4316	tags=36%, list=24%, signal=47%
REACTOME_P75_NTR_RECEPTOR_MEDIATED_SIGNALLING	REACTOME_P75_NTR_RECEPTOR_MEDIATED_SIGNALLING		73	-0.312475	-1.1722279	0.16806723	0.4181413	1	2621	tags=26%, list=15%, signal=30%
AIYAR_COBRA1_TARGETS_DN	AIYAR_COBRA1_TARGETS_DN		27	-0.38148913	-1.1719129	0.2186589	0.41817433	1	1949	tags=22%, list=11%, signal=25%
YAUCH_HEDGEHOG_SIGNALING_PARACRINE_DN	YAUCH_HEDGEHOG_SIGNALING_PARACRINE_DN		173	-0.26857156	-1.1718525	0.07608695	0.41762704	1	1277	tags=13%, list=7%, signal=14%
SERVITJA_ISLET_HNF1A_TARGETS_DN	SERVITJA_ISLET_HNF1A_TARGETS_DN		62	-0.31407422	-1.1714013	0.16858238	0.4179898	1	778	tags=15%, list=4%, signal=15%
LEE_RECENT_THYMIC_EMIGRANT	LEE_RECENT_THYMIC_EMIGRANT		190	-0.26361975	-1.1708734	0.07801419	0.41846555	1	3354	tags=27%, list=19%, signal=33%
YAO_TEMPORAL_RESPONSE_TO_PROGESTERONE_CLUSTER_15	YAO_TEMPORAL_RESPONSE_TO_PROGESTERONE_CLUSTER_15		32	-0.35860565	-1.1707469	0.21052632	0.41804114	1	4504	tags=53%, list=25%, signal=71%
DAVICIONI_PAX_FOXO1_SIGNATURE_IN_ARMS_UP	DAVICIONI_PAX_FOXO1_SIGNATURE_IN_ARMS_UP		53	-0.32847273	-1.1698489	0.20071685	0.41941163	1	1671	tags=23%, list=9%, signal=25%
REACTOME_APC_C_CDC20_MEDIATED_DEGRADATION_OF_CYCLIN_B	REACTOME_APC_C_CDC20_MEDIATED_DEGRADATION_OF_CYCLIN_B		19	-0.41188747	-1.1684719	0.25696594	0.42195925	1	2098	tags=21%, list=12%, signal=24%
ZHANG_GATA6_TARGETS_DN	ZHANG_GATA6_TARGETS_DN		54	-0.32684538	-1.1682886	0.17753623	0.4216558	1	2729	tags=24%, list=15%, signal=28%
YU_BAP1_TARGETS	YU_BAP1_TARGETS		26	-0.37575743	-1.1676376	0.25	0.42245203	1	3500	tags=46%, list=19%, signal=57%
DACOSTA_UV_RESPONSE_VIA_ERCC3_UP	DACOSTA_UV_RESPONSE_VIA_ERCC3_UP		300	-0.24993785	-1.1661954	0.056603774	0.42494658	1	3288	tags=25%, list=18%, signal=30%
DURCHDEWALD_SKIN_CARCINOGENESIS_UP	DURCHDEWALD_SKIN_CARCINOGENESIS_UP		67	-0.31097835	-1.1655426	0.19565217	0.42570913	1	3342	tags=36%, list=19%, signal=44%
MOREAUX_MULTIPLE_MYELOMA_BY_TACI_UP	MOREAUX_MULTIPLE_MYELOMA_BY_TACI_UP		282	-0.25245845	-1.163873	0.046296295	0.42870972	1	1308	tags=13%, list=7%, signal=14%
MILI_PSEUDOPODIA	MILI_PSEUDOPODIA		41	-0.34675542	-1.1635243	0.23364486	0.4288242	1	2979	tags=32%, list=17%, signal=38%
XU_HGF_TARGETS_INDUCED_BY_AKT1_48HR_DN	XU_HGF_TARGETS_INDUCED_BY_AKT1_48HR_DN		24	-0.3851543	-1.1632614	0.23619632	0.42880166	1	1845	tags=33%, list=10%, signal=37%
HUI_MAPK14_TARGETS_UP	HUI_MAPK14_TARGETS_UP		17	-0.42045754	-1.162554	0.2546917	0.42965356	1	267	tags=18%, list=1%, signal=18%
BIOCARTA_HDAC_PATHWAY	BIOCARTA_HDAC_PATHWAY		23	-0.38346708	-1.1625228	0.23708206	0.42905286	1	1364	tags=13%, list=8%, signal=14%
JIANG_HYPOXIA_CANCER	JIANG_HYPOXIA_CANCER		75	-0.3038121	-1.1620758	0.19512194	0.42933905	1	3102	tags=21%, list=17%, signal=26%
BOHN_PRIMARY_IMMUNODEFICIENCY_SYNDROM_UP	BOHN_PRIMARY_IMMUNODEFICIENCY_SYNDROM_UP		44	-0.33872393	-1.1595106	0.19666667	0.43442842	1	3010	tags=32%, list=17%, signal=38%
RICKMAN_METASTASIS_DN	RICKMAN_METASTASIS_DN		212	-0.26346585	-1.159418	0.09615385	0.43398833	1	1206	tags=12%, list=7%, signal=13%
GENTILE_UV_RESPONSE_CLUSTER_D7	GENTILE_UV_RESPONSE_CLUSTER_D7		39	-0.34555307	-1.1591545	0.21678321	0.4338831	1	3277	tags=36%, list=18%, signal=44%
KUMAR_TARGETS_OF_MLL_AF9_FUSION	KUMAR_TARGETS_OF_MLL_AF9_FUSION		301	-0.25259572	-1.157555	0.08181818	0.43686554	1	3027	tags=20%, list=17%, signal=24%
HOWLIN_CITED1_TARGETS_1_UP	HOWLIN_CITED1_TARGETS_1_UP		28	-0.37327978	-1.1564962	0.23564954	0.43854427	1	1006	tags=14%, list=6%, signal=15%
REACTOME_PHOSPHORYLATION_OF_THE_APC_C	REACTOME_PHOSPHORYLATION_OF_THE_APC_C		17	-0.41217294	-1.1561007	0.27034122	0.43888554	1	2098	tags=24%, list=12%, signal=27%
HEDENFALK_BREAST_CANCER_HEREDITARY_VS_SPORADIC	HEDENFALK_BREAST_CANCER_HEREDITARY_VS_SPORADIC		46	-0.3354974	-1.1533046	0.20422535	0.44446293	1	5702	tags=52%, list=32%, signal=76%
LINDGREN_BLADDER_CANCER_HIGH_RECURRENCE	LINDGREN_BLADDER_CANCER_HIGH_RECURRENCE		45	-0.33304545	-1.1531777	0.19622642	0.4440931	1	2045	tags=24%, list=11%, signal=28%
BIOCARTA_CARM_ER_PATHWAY	BIOCARTA_CARM_ER_PATHWAY		34	-0.3554085	-1.1531575	0.24183007	0.44346446	1	2451	tags=24%, list=14%, signal=27%
ZHAN_MULTIPLE_MYELOMA_MS_DN	ZHAN_MULTIPLE_MYELOMA_MS_DN		42	-0.3324936	-1.1512777	0.2032258	0.44719654	1	4846	tags=40%, list=27%, signal=55%
BENPORATH_MYC_TARGETS_WITH_EBOX	BENPORATH_MYC_TARGETS_WITH_EBOX		209	-0.25717384	-1.1501313	0.06818182	0.44917282	1	3929	tags=32%, list=22%, signal=40%
REACTOME_PYRIMIDINE_METABOLISM	REACTOME_PYRIMIDINE_METABOLISM		20	-0.40620226	-1.1500487	0.24556214	0.44865412	1	3381	tags=45%, list=19%, signal=55%
GAUSSMANN_MLL_AF4_FUSION_TARGETS_B_UP	GAUSSMANN_MLL_AF4_FUSION_TARGETS_B_UP		22	-0.38578898	-1.1498328	0.26123595	0.44845206	1	2709	tags=23%, list=15%, signal=27%
ZHENG_IL22_SIGNALING_DN	ZHENG_IL22_SIGNALING_DN		32	-0.35651985	-1.1490135	0.24561404	0.44976154	1	3037	tags=34%, list=17%, signal=41%
YAO_TEMPORAL_RESPONSE_TO_PROGESTERONE_CLUSTER_14	YAO_TEMPORAL_RESPONSE_TO_PROGESTERONE_CLUSTER_14		137	-0.2754378	-1.1483333	0.13541667	0.45064867	1	4135	tags=26%, list=23%, signal=33%
PUIFFE_INVASION_INHIBITED_BY_ASCITES_UP	PUIFFE_INVASION_INHIBITED_BY_ASCITES_UP		80	-0.29785368	-1.1480359	0.18	0.45066124	1	3672	tags=29%, list=20%, signal=36%
HAN_JNK_SINGALING_UP	HAN_JNK_SINGALING_UP		32	-0.35671213	-1.1477737	0.24605678	0.45059434	1	1781	tags=25%, list=10%, signal=28%
REACTOME_JNK_C_JUN_KINASES_PHOSPHORYLATION_AND_ACTIVATION_MEDIATED_BY_ACTIVATED_HUMAN_TAK1	REACTOME_JNK_C_JUN_KINASES_PHOSPHORYLATION_AND_ACTIVATION_MEDIATED_BY_ACTIVATED_HUMAN_TAK1		16	-0.41867867	-1.1472234	0.27792916	0.45122433	1	1481	tags=19%, list=8%, signal=20%
RICKMAN_METASTASIS_UP	RICKMAN_METASTASIS_UP		316	-0.24488321	-1.1471505	0.072916664	0.45069423	1	3111	tags=19%, list=17%, signal=23%
GAUSSMANN_MLL_AF4_FUSION_TARGETS_D_UP	GAUSSMANN_MLL_AF4_FUSION_TARGETS_D_UP		27	-0.36497587	-1.1466352	0.25903615	0.45120543	1	2034	tags=22%, list=11%, signal=25%
BONOME_OVARIAN_CANCER_SURVIVAL_SUBOPTIMAL_DEBULKING	BONOME_OVARIAN_CANCER_SURVIVAL_SUBOPTIMAL_DEBULKING		448	-0.23660715	-1.1464708	0.02739726	0.45088857	1	3151	tags=21%, list=17%, signal=25%
REACTOME_KINESINS	REACTOME_KINESINS		22	-0.38515395	-1.1460124	0.22873901	0.45126298	1	3378	tags=41%, list=19%, signal=50%
HERNANDEZ_MITOTIC_ARREST_BY_DOCETAXEL_1_UP	HERNANDEZ_MITOTIC_ARREST_BY_DOCETAXEL_1_UP		27	-0.36856326	-1.1445372	0.26347306	0.45399478	1	1387	tags=26%, list=8%, signal=28%
WINNEPENNINCKX_MELANOMA_METASTASIS_DN	WINNEPENNINCKX_MELANOMA_METASTASIS_DN		23	-0.38143998	-1.1444173	0.27331188	0.45359704	1	1476	tags=17%, list=8%, signal=19%
REACTOME_APOPTOTIC_EXECUTION_PHASE	REACTOME_APOPTOTIC_EXECUTION_PHASE		46	-0.3292045	-1.1443899	0.22292994	0.45297778	1	3462	tags=35%, list=19%, signal=43%
MCCABE_BOUND_BY_HOXC6	MCCABE_BOUND_BY_HOXC6		318	-0.25141445	-1.1443076	0.10526316	0.45250687	1	2494	tags=18%, list=14%, signal=21%
DOANE_BREAST_CANCER_ESR1_UP	DOANE_BREAST_CANCER_ESR1_UP		83	-0.28718454	-1.1439623	0.17213115	0.45259213	1	2096	tags=25%, list=12%, signal=28%
DANG_REGULATED_BY_MYC_UP	DANG_REGULATED_BY_MYC_UP		69	-0.30162176	-1.1432856	0.18875502	0.45349538	1	4572	tags=46%, list=25%, signal=62%
SUZUKI_RESPONSE_TO_TSA	SUZUKI_RESPONSE_TO_TSA		16	-0.4130511	-1.1430206	0.29090908	0.45339534	1	3029	tags=38%, list=17%, signal=45%
HUPER_BREAST_BASAL_VS_LUMINAL_UP	HUPER_BREAST_BASAL_VS_LUMINAL_UP		29	-0.35935792	-1.141556	0.25641027	0.45622155	1	773	tags=14%, list=4%, signal=14%
YANG_BCL3_TARGETS_UP	YANG_BCL3_TARGETS_UP		297	-0.24909765	-1.1392994	0.0776699	0.46089548	1	3008	tags=30%, list=17%, signal=36%
REACTOME_NUCLEOTIDE_BINDING_DOMAIN_LEUCINE_RICH_REPEAT_CONTAINING_RECEPTOR_NLR_SIGNALING_PATHWAYS	REACTOME_NUCLEOTIDE_BINDING_DOMAIN_LEUCINE_RICH_REPEAT_CONTAINING_RECEPTOR_NLR_SIGNALING_PATHWAYS		39	-0.33663332	-1.138863	0.21835443	0.46124572	1	1481	tags=15%, list=8%, signal=17%
DELACROIX_RARG_BOUND_MEF	DELACROIX_RARG_BOUND_MEF		321	-0.24687625	-1.1381272	0.12371134	0.46230313	1	1872	tags=17%, list=10%, signal=19%
MOSERLE_IFNA_RESPONSE	MOSERLE_IFNA_RESPONSE		26	-0.3763819	-1.1374247	0.25833333	0.4632579	1	694	tags=15%, list=4%, signal=16%
ZHANG_ANTIVIRAL_RESPONSE_TO_RIBAVIRIN_UP	ZHANG_ANTIVIRAL_RESPONSE_TO_RIBAVIRIN_UP		25	-0.3684064	-1.1369278	0.25757575	0.46367478	1	1192	tags=20%, list=7%, signal=21%
HEIDENBLAD_AMPLICON_12P11_12_DN	HEIDENBLAD_AMPLICON_12P11_12_DN		22	-0.3807674	-1.1356732	0.2826087	0.4658784	1	3849	tags=50%, list=21%, signal=63%
LANDIS_BREAST_CANCER_PROGRESSION_DN	LANDIS_BREAST_CANCER_PROGRESSION_DN		63	-0.3038495	-1.1355214	0.1875	0.46553946	1	2294	tags=22%, list=13%, signal=25%
RICKMAN_HEAD_AND_NECK_CANCER_A	RICKMAN_HEAD_AND_NECK_CANCER_A		73	-0.30125165	-1.1346887	0.19927536	0.46689636	1	1987	tags=18%, list=11%, signal=20%
STARK_HYPPOCAMPUS_22Q11_DELETION_DN	STARK_HYPPOCAMPUS_22Q11_DELETION_DN		17	-0.4100304	-1.134345	0.2722063	0.46698338	1	4135	tags=35%, list=23%, signal=46%
WIELAND_UP_BY_HBV_INFECTION	WIELAND_UP_BY_HBV_INFECTION		77	-0.29092044	-1.1339377	0.18287937	0.467222	1	2156	tags=25%, list=12%, signal=28%
BYSTRYKH_HEMATOPOIESIS_STEM_CELL_QTL_CIS	BYSTRYKH_HEMATOPOIESIS_STEM_CELL_QTL_CIS		101	-0.27585262	-1.1335306	0.1891892	0.4674862	1	2297	tags=17%, list=13%, signal=19%
BASSO_CD40_SIGNALING_UP	BASSO_CD40_SIGNALING_UP		80	-0.28912625	-1.1320946	0.1880734	0.47026148	1	1742	tags=18%, list=10%, signal=19%
PEDERSEN_METASTASIS_BY_ERBB2_ISOFORM_7	PEDERSEN_METASTASIS_BY_ERBB2_ISOFORM_7		348	-0.24280144	-1.1318976	0.09090909	0.47006863	1	2285	tags=22%, list=13%, signal=24%
WANG_METASTASIS_OF_BREAST_CANCER_ESR1_DN	WANG_METASTASIS_OF_BREAST_CANCER_ESR1_DN		25	-0.3771129	-1.1317855	0.2994012	0.46959937	1	643	tags=16%, list=4%, signal=17%
PID_SYNDECAN_1_PATHWAY	PID_SYNDECAN_1_PATHWAY		40	-0.3376804	-1.1306838	0.23853211	0.47158152	1	1462	tags=23%, list=8%, signal=24%
REACTOME_AMINE_COMPOUND_SLC_TRANSPORTERS	REACTOME_AMINE_COMPOUND_SLC_TRANSPORTERS		16	-0.4170963	-1.1294478	0.28932583	0.47390342	1	922	tags=25%, list=5%, signal=26%
PID_E2F_PATHWAY	PID_E2F_PATHWAY		70	-0.29684582	-1.1280205	0.21268657	0.47666013	1	2753	tags=37%, list=15%, signal=44%
BURTON_ADIPOGENESIS_PEAK_AT_0HR	BURTON_ADIPOGENESIS_PEAK_AT_0HR		53	-0.30964684	-1.1276845	0.23636363	0.47672498	1	2173	tags=28%, list=12%, signal=32%
BERENJENO_TRANSFORMED_BY_RHOA_FOREVER_UP	BERENJENO_TRANSFORMED_BY_RHOA_FOREVER_UP		16	-0.41780525	-1.1271832	0.27763495	0.4772007	1	400	tags=19%, list=2%, signal=19%
KORKOLA_YOLK_SAC_TUMOR	KORKOLA_YOLK_SAC_TUMOR		41	-0.3229258	-1.1261504	0.24199288	0.47907305	1	1594	tags=20%, list=9%, signal=21%
REACTOME_GLYCOGEN_BREAKDOWN_GLYCOGENOLYSIS	REACTOME_GLYCOGEN_BREAKDOWN_GLYCOGENOLYSIS		16	-0.4024484	-1.1260859	0.30812326	0.47858188	1	724	tags=13%, list=4%, signal=13%
LEE_LIVER_CANCER_E2F1_DN	LEE_LIVER_CANCER_E2F1_DN		38	-0.33382174	-1.1255077	0.2539185	0.4792889	1	690	tags=13%, list=4%, signal=14%
PLASARI_TGFB1_SIGNALING_VIA_NFIC_1HR_DN	PLASARI_TGFB1_SIGNALING_VIA_NFIC_1HR_DN		91	-0.2863395	-1.125218	0.15384616	0.47928715	1	805	tags=12%, list=4%, signal=13%
SABATES_COLORECTAL_ADENOMA_UP	SABATES_COLORECTAL_ADENOMA_UP		74	-0.29364735	-1.1249917	0.24180327	0.47916922	1	1815	tags=23%, list=10%, signal=25%
PID_ARF6_DOWNSTREAM_PATHWAY	PID_ARF6_DOWNSTREAM_PATHWAY		15	-0.4134431	-1.1234714	0.32033426	0.48222077	1	1347	tags=13%, list=7%, signal=14%
RODRIGUES_NTN1_TARGETS_UP	RODRIGUES_NTN1_TARGETS_UP		16	-0.41408008	-1.1226753	0.28530258	0.48343447	1	1042	tags=31%, list=6%, signal=33%
WELCSH_BRCA1_TARGETS_DN	WELCSH_BRCA1_TARGETS_DN		137	-0.2694337	-1.122043	0.19072165	0.4842381	1	1563	tags=10%, list=9%, signal=11%
REACTOME_HS_GAG_DEGRADATION	REACTOME_HS_GAG_DEGRADATION		18	-0.40056112	-1.120804	0.31506848	0.4863979	1	1037	tags=17%, list=6%, signal=18%
LI_WILMS_TUMOR_VS_FETAL_KIDNEY_1_UP	LI_WILMS_TUMOR_VS_FETAL_KIDNEY_1_UP		171	-0.2589437	-1.1203547	0.16666667	0.4867662	1	1428	tags=13%, list=8%, signal=14%
SCHAEFFER_PROSTATE_DEVELOPMENT_12HR_UP	SCHAEFFER_PROSTATE_DEVELOPMENT_12HR_UP		93	-0.28570756	-1.1198385	0.22180451	0.48731786	1	1917	tags=18%, list=11%, signal=20%
SENESE_HDAC1_AND_HDAC2_TARGETS_DN	SENESE_HDAC1_AND_HDAC2_TARGETS_DN		190	-0.25590572	-1.1194022	0.16129032	0.4877421	1	2485	tags=23%, list=14%, signal=26%
ZAMORA_NOS2_TARGETS_UP	ZAMORA_NOS2_TARGETS_UP		64	-0.2952799	-1.1190361	0.2202166	0.48789623	1	3327	tags=30%, list=18%, signal=36%
REACTOME_SPHINGOLIPID_DE_NOVO_BIOSYNTHESIS	REACTOME_SPHINGOLIPID_DE_NOVO_BIOSYNTHESIS		27	-0.35581702	-1.1184947	0.2815534	0.48855045	1	76	tags=7%, list=0%, signal=7%
BROWNE_HCMV_INFECTION_14HR_DN	BROWNE_HCMV_INFECTION_14HR_DN		258	-0.24525338	-1.118198	0.129771	0.48861748	1	1876	tags=16%, list=10%, signal=18%
BIOCARTA_FMLP_PATHWAY	BIOCARTA_FMLP_PATHWAY		31	-0.3510131	-1.1179712	0.2676923	0.488508	1	1347	tags=13%, list=7%, signal=14%
LEE_LIVER_CANCER_ACOX1_UP	LEE_LIVER_CANCER_ACOX1_UP		46	-0.3242889	-1.1170602	0.2693727	0.49006134	1	2974	tags=33%, list=16%, signal=39%
BOYLAN_MULTIPLE_MYELOMA_C_CLUSTER_UP	BOYLAN_MULTIPLE_MYELOMA_C_CLUSTER_UP		35	-0.3507726	-1.1169431	0.28096676	0.4896442	1	2649	tags=31%, list=15%, signal=37%
HOFFMANN_IMMATURE_TO_MATURE_B_LYMPHOCYTE_UP	HOFFMANN_IMMATURE_TO_MATURE_B_LYMPHOCYTE_UP		34	-0.3458867	-1.1164961	0.2804054	0.4900939	1	1052	tags=15%, list=6%, signal=16%
MULLIGHAN_NPM1_MUTATED_SIGNATURE_2_DN	MULLIGHAN_NPM1_MUTATED_SIGNATURE_2_DN		68	-0.29680362	-1.1163912	0.22088353	0.4896427	1	1154	tags=12%, list=6%, signal=13%
REACTOME_PROCESSING_OF_CAPPED_INTRON_CONTAINING_PRE_MRNA	REACTOME_PROCESSING_OF_CAPPED_INTRON_CONTAINING_PRE_MRNA		135	-0.26424697	-1.1162826	0.15897436	0.48920944	1	5098	tags=43%, list=28%, signal=59%
CHANDRAN_METASTASIS_TOP50_UP	CHANDRAN_METASTASIS_TOP50_UP		34	-0.3372167	-1.1162759	0.26530612	0.4885315	1	4739	tags=41%, list=26%, signal=56%
REACTOME_INTERFERON_SIGNALING	REACTOME_INTERFERON_SIGNALING		126	-0.26494437	-1.1157095	0.1843318	0.48929998	1	1549	tags=13%, list=9%, signal=15%
KEGG_CYSTEINE_AND_METHIONINE_METABOLISM	KEGG_CYSTEINE_AND_METHIONINE_METABOLISM		29	-0.34554383	-1.115609	0.27878788	0.48886	1	4546	tags=45%, list=25%, signal=60%
PID_WNT_NONCANONICAL_PATHWAY	PID_WNT_NONCANONICAL_PATHWAY		32	-0.34488675	-1.1155834	0.28104576	0.48821744	1	1613	tags=13%, list=9%, signal=14%
PID_ALPHA_SYNUCLEIN_PATHWAY	PID_ALPHA_SYNUCLEIN_PATHWAY		27	-0.36240196	-1.1154826	0.28881988	0.4877606	1	1347	tags=22%, list=7%, signal=24%
KEGG_PYRUVATE_METABOLISM	KEGG_PYRUVATE_METABOLISM		34	-0.34288466	-1.1145566	0.2576687	0.48921168	1	1515	tags=15%, list=8%, signal=16%
REACTOME_GLUCOSE_TRANSPORT	REACTOME_GLUCOSE_TRANSPORT		33	-0.33628628	-1.1144658	0.26666668	0.48874772	1	3773	tags=45%, list=21%, signal=57%
PEART_HDAC_PROLIFERATION_CLUSTER_DN	PEART_HDAC_PROLIFERATION_CLUSTER_DN		67	-0.29298395	-1.114184	0.24719101	0.48878998	1	4258	tags=42%, list=24%, signal=55%
SATO_SILENCED_BY_METHYLATION_IN_PANCREATIC_CANCER_2	SATO_SILENCED_BY_METHYLATION_IN_PANCREATIC_CANCER_2		33	-0.33679166	-1.1137933	0.27244583	0.4889998	1	1826	tags=27%, list=10%, signal=30%
MULLIGHAN_MLL_SIGNATURE_1_DN	MULLIGHAN_MLL_SIGNATURE_1_DN		197	-0.25340614	-1.1133609	0.16993465	0.48932144	1	3036	tags=24%, list=17%, signal=29%
KAPOSI_LIVER_CANCER_MET_UP	KAPOSI_LIVER_CANCER_MET_UP		17	-0.40174404	-1.1131943	0.30081302	0.48900297	1	1347	tags=12%, list=7%, signal=13%
KEGG_MELANOGENESIS	KEGG_MELANOGENESIS		80	-0.2868194	-1.1126013	0.21757323	0.48974925	1	1545	tags=19%, list=9%, signal=20%
GRADE_METASTASIS_DN	GRADE_METASTASIS_DN		45	-0.3235856	-1.112083	0.27666667	0.49037346	1	3085	tags=16%, list=17%, signal=19%
KIM_MYCN_AMPLIFICATION_TARGETS_DN	KIM_MYCN_AMPLIFICATION_TARGETS_DN		91	-0.27787966	-1.1120149	0.21645021	0.48986137	1	2542	tags=24%, list=14%, signal=28%
REACTOME_NEGATIVE_REGULATORS_OF_RIG_I_MDA5_SIGNALING	REACTOME_NEGATIVE_REGULATORS_OF_RIG_I_MDA5_SIGNALING		29	-0.35523975	-1.1112832	0.2742857	0.49098247	1	3377	tags=28%, list=19%, signal=34%
MARIADASON_REGULATED_BY_HISTONE_ACETYLATION_UP	MARIADASON_REGULATED_BY_HISTONE_ACETYLATION_UP		72	-0.2977597	-1.11107	0.26436782	0.4908298	1	1166	tags=13%, list=6%, signal=13%
CHANGOLKAR_H2AFY_TARGETS_DN	CHANGOLKAR_H2AFY_TARGETS_DN		33	-0.33886963	-1.1109753	0.27986348	0.4903794	1	2135	tags=21%, list=12%, signal=24%
SMITH_TERT_TARGETS_DN	SMITH_TERT_TARGETS_DN		80	-0.28029954	-1.110819	0.22692308	0.49011248	1	3025	tags=29%, list=17%, signal=34%
LEIN_OLIGODENDROCYTE_MARKERS	LEIN_OLIGODENDROCYTE_MARKERS		51	-0.3063517	-1.1106173	0.26206896	0.48995602	1	1815	tags=18%, list=10%, signal=20%
MALONEY_RESPONSE_TO_17AAG_DN	MALONEY_RESPONSE_TO_17AAG_DN		78	-0.29127383	-1.1099604	0.23694779	0.49086487	1	4472	tags=33%, list=25%, signal=44%
CHANGOLKAR_H2AFY_TARGETS_UP	CHANGOLKAR_H2AFY_TARGETS_UP		42	-0.32552135	-1.108842	0.2724359	0.49291936	1	2109	tags=21%, list=12%, signal=24%
REACTOME_RNA_POL_III_TRANSCRIPTION_TERMINATION	REACTOME_RNA_POL_III_TRANSCRIPTION_TERMINATION		19	-0.39664155	-1.1079572	0.29498526	0.4944183	1	4558	tags=47%, list=25%, signal=63%
BIOCARTA_MAL_PATHWAY	BIOCARTA_MAL_PATHWAY		17	-0.40574035	-1.1073774	0.31955922	0.49512157	1	1347	tags=12%, list=7%, signal=13%
PID_ERBB4_PATHWAY	PID_ERBB4_PATHWAY		32	-0.34373516	-1.1049289	0.28197673	0.50043744	1	1347	tags=13%, list=7%, signal=13%
BOCHKIS_FOXA2_TARGETS	BOCHKIS_FOXA2_TARGETS		341	-0.23804937	-1.1044232	0.09375	0.5010958	1	2341	tags=17%, list=13%, signal=20%
YOSHIOKA_LIVER_CANCER_EARLY_RECURRENCE_DN	YOSHIOKA_LIVER_CANCER_EARLY_RECURRENCE_DN		45	-0.32263398	-1.104235	0.26732674	0.5008557	1	2512	tags=22%, list=14%, signal=26%
ZHAN_MULTIPLE_MYELOMA_CD2_UP	ZHAN_MULTIPLE_MYELOMA_CD2_UP		38	-0.3340982	-1.1038388	0.2818792	0.50119513	1	954	tags=16%, list=5%, signal=17%
BROWNE_HCMV_INFECTION_8HR_UP	BROWNE_HCMV_INFECTION_8HR_UP		91	-0.27796215	-1.1034555	0.21777777	0.50137305	1	563	tags=10%, list=3%, signal=10%
XU_CREBBP_TARGETS_UP	XU_CREBBP_TARGETS_UP		22	-0.37323493	-1.102475	0.2990654	0.5031208	1	3729	tags=41%, list=21%, signal=52%
KEGG_PROPANOATE_METABOLISM	KEGG_PROPANOATE_METABOLISM		31	-0.35140696	-1.1024737	0.29447854	0.5024372	1	2810	tags=26%, list=16%, signal=31%
LEE_LIVER_CANCER_MYC_UP	LEE_LIVER_CANCER_MYC_UP		44	-0.31229085	-1.1002872	0.275	0.50727534	1	1884	tags=20%, list=10%, signal=23%
CASTELLANO_NRAS_TARGETS_UP	CASTELLANO_NRAS_TARGETS_UP		57	-0.301121	-1.1002622	0.26643598	0.506646	1	1931	tags=19%, list=11%, signal=22%
HOOI_ST7_TARGETS_DN	HOOI_ST7_TARGETS_DN		99	-0.27538362	-1.0977352	0.23469388	0.5124109	1	1774	tags=18%, list=10%, signal=20%
KANG_AR_TARGETS_UP	KANG_AR_TARGETS_UP		15	-0.40952304	-1.0966966	0.3008596	0.5143922	1	569	tags=20%, list=3%, signal=21%
DASU_IL6_SIGNALING_SCAR_UP	DASU_IL6_SIGNALING_SCAR_UP		27	-0.34656462	-1.0957165	0.31142858	0.5161805	1	2673	tags=30%, list=15%, signal=35%
GEORGANTAS_HSC_MARKERS	GEORGANTAS_HSC_MARKERS		51	-0.30435276	-1.0956631	0.3006993	0.5155982	1	1351	tags=27%, list=7%, signal=30%
KORKOLA_EMBRYONAL_CARCINOMA_UP	KORKOLA_EMBRYONAL_CARCINOMA_UP		34	-0.33500224	-1.094852	0.33950618	0.5170936	1	198	tags=9%, list=1%, signal=9%
MELLMAN_TUT1_TARGETS_DN	MELLMAN_TUT1_TARGETS_DN		47	-0.30919945	-1.0938418	0.2893082	0.51901484	1	1917	tags=21%, list=11%, signal=24%
REACTOME_SEMA4D_IN_SEMAPHORIN_SIGNALING	REACTOME_SEMA4D_IN_SEMAPHORIN_SIGNALING		27	-0.35045937	-1.0936885	0.3196481	0.51870024	1	2407	tags=22%, list=13%, signal=26%
NIELSEN_SYNOVIAL_SARCOMA_DN	NIELSEN_SYNOVIAL_SARCOMA_DN		15	-0.40130514	-1.0935208	0.28981724	0.5184252	1	1234	tags=27%, list=7%, signal=29%
FOSTER_KDM1A_TARGETS_DN	FOSTER_KDM1A_TARGETS_DN		193	-0.25123632	-1.092496	0.21138212	0.52042305	1	2533	tags=20%, list=14%, signal=23%
WILLIAMS_ESR1_TARGETS_UP	WILLIAMS_ESR1_TARGETS_UP		22	-0.37972426	-1.0922487	0.30252102	0.5204131	1	3107	tags=50%, list=17%, signal=60%
SCHAEFFER_PROSTATE_DEVELOPMENT_6HR_DN	SCHAEFFER_PROSTATE_DEVELOPMENT_6HR_DN		474	-0.22758394	-1.0917305	0.14285715	0.52105254	1	2785	tags=17%, list=15%, signal=19%
FARMER_BREAST_CANCER_CLUSTER_5	FARMER_BREAST_CANCER_CLUSTER_5		17	-0.38629302	-1.0907567	0.32876712	0.5228866	1	11077	tags=100%, list=61%, signal=259%
GARGALOVIC_RESPONSE_TO_OXIDIZED_PHOSPHOLIPIDS_GREY_DN	GARGALOVIC_RESPONSE_TO_OXIDIZED_PHOSPHOLIPIDS_GREY_DN		52	-0.30851394	-1.090325	0.29241878	0.52327126	1	1360	tags=17%, list=8%, signal=19%
WEST_ADRENOCORTICAL_TUMOR_UP	WEST_ADRENOCORTICAL_TUMOR_UP		280	-0.23636566	-1.0891628	0.12727273	0.5255635	1	2471	tags=19%, list=14%, signal=22%
FERNANDEZ_BOUND_BY_MYC	FERNANDEZ_BOUND_BY_MYC		160	-0.25400394	-1.0888786	0.21264368	0.5256092	1	3411	tags=29%, list=19%, signal=35%
AGUIRRE_PANCREATIC_CANCER_COPY_NUMBER_DN	AGUIRRE_PANCREATIC_CANCER_COPY_NUMBER_DN		224	-0.2404527	-1.088474	0.19672132	0.5259952	1	3653	tags=25%, list=20%, signal=31%
SCHRAETS_MLL_TARGETS_DN	SCHRAETS_MLL_TARGETS_DN		25	-0.35815042	-1.0882182	0.31962025	0.5259638	1	2651	tags=32%, list=15%, signal=37%
GARGALOVIC_RESPONSE_TO_OXIDIZED_PHOSPHOLIPIDS_BLUE_DN	GARGALOVIC_RESPONSE_TO_OXIDIZED_PHOSPHOLIPIDS_BLUE_DN		52	-0.3021872	-1.0881727	0.2877193	0.52539206	1	2923	tags=29%, list=16%, signal=34%
REACTOME_PROCESSING_OF_CAPPED_INTRONLESS_PRE_MRNA	REACTOME_PROCESSING_OF_CAPPED_INTRONLESS_PRE_MRNA		23	-0.36957484	-1.0878559	0.32664755	0.5255071	1	4890	tags=52%, list=27%, signal=71%
REACTOME_SHC_MEDIATED_CASCADE	REACTOME_SHC_MEDIATED_CASCADE		18	-0.38403943	-1.0877687	0.3089431	0.5250765	1	2627	tags=28%, list=15%, signal=32%
REACTOME_CYTOKINE_SIGNALING_IN_IMMUNE_SYSTEM	REACTOME_CYTOKINE_SIGNALING_IN_IMMUNE_SYSTEM		214	-0.24287607	-1.0877659	0.22857143	0.5243942	1	1549	tags=13%, list=9%, signal=14%
DOANE_RESPONSE_TO_ANDROGEN_DN	DOANE_RESPONSE_TO_ANDROGEN_DN		224	-0.24638496	-1.0876677	0.16783217	0.5239464	1	2231	tags=21%, list=12%, signal=24%
VIETOR_IFRD1_TARGETS	VIETOR_IFRD1_TARGETS		19	-0.3900287	-1.0861065	0.33850932	0.52726805	1	2593	tags=42%, list=14%, signal=49%
MCBRYAN_PUBERTAL_BREAST_4_5WK_DN	MCBRYAN_PUBERTAL_BREAST_4_5WK_DN		165	-0.2557204	-1.0858607	0.2616279	0.5271428	1	1241	tags=12%, list=7%, signal=13%
REACTOME_TRANSPORT_OF_MATURE_MRNA_DERIVED_FROM_AN_INTRONLESS_TRANSCRIPT	REACTOME_TRANSPORT_OF_MATURE_MRNA_DERIVED_FROM_AN_INTRONLESS_TRANSCRIPT		32	-0.33517352	-1.0855818	0.32214764	0.5271985	1	4195	tags=50%, list=23%, signal=65%
CHANG_IMMORTALIZED_BY_HPV31_UP	CHANG_IMMORTALIZED_BY_HPV31_UP		72	-0.2892698	-1.0854309	0.26938775	0.52691853	1	2317	tags=22%, list=13%, signal=25%
HOFFMANN_SMALL_PRE_BII_TO_IMMATURE_B_LYMPHOCYTE_DN	HOFFMANN_SMALL_PRE_BII_TO_IMMATURE_B_LYMPHOCYTE_DN		41	-0.30968532	-1.0842248	0.31428573	0.5292224	1	2362	tags=27%, list=13%, signal=31%
IVANOVA_HEMATOPOIESIS_LATE_PROGENITOR	IVANOVA_HEMATOPOIESIS_LATE_PROGENITOR		450	-0.22866067	-1.0833068	0.15625	0.5308619	1	2660	tags=18%, list=15%, signal=21%
FIGUEROA_AML_METHYLATION_CLUSTER_4_UP	FIGUEROA_AML_METHYLATION_CLUSTER_4_UP		92	-0.2695072	-1.0832568	0.26576576	0.53028995	1	1536	tags=15%, list=9%, signal=17%
LANDIS_ERBB2_BREAST_PRENEOPLASTIC_UP	LANDIS_ERBB2_BREAST_PRENEOPLASTIC_UP		16	-0.39681134	-1.0831277	0.31767955	0.5299155	1	3633	tags=56%, list=20%, signal=70%
REACTOME_CONVERSION_FROM_APC_C_CDC20_TO_APC_C_CDH1_IN_LATE_ANAPHASE	REACTOME_CONVERSION_FROM_APC_C_CDC20_TO_APC_C_CDH1_IN_LATE_ANAPHASE		16	-0.39311442	-1.0803318	0.3181818	0.5366247	1	1677	tags=19%, list=9%, signal=21%
GRADE_COLON_AND_RECTAL_CANCER_UP	GRADE_COLON_AND_RECTAL_CANCER_UP		266	-0.23907572	-1.079823	0.16513762	0.53717035	1	4122	tags=32%, list=23%, signal=40%
REACTOME_FRS2_MEDIATED_CASCADE	REACTOME_FRS2_MEDIATED_CASCADE		26	-0.3493873	-1.0791858	0.35457063	0.5379527	1	2627	tags=23%, list=15%, signal=27%
REACTOME_SIGNALING_BY_NOTCH	REACTOME_SIGNALING_BY_NOTCH		93	-0.27033818	-1.0790963	0.25	0.53750515	1	2642	tags=22%, list=15%, signal=25%
VALK_AML_CLUSTER_11	VALK_AML_CLUSTER_11		29	-0.3405776	-1.0779793	0.3553459	0.539903	1	1814	tags=17%, list=10%, signal=19%
ROSS_AML_WITH_AML1_ETO_FUSION	ROSS_AML_WITH_AML1_ETO_FUSION		66	-0.28426823	-1.0774926	0.3243243	0.54041463	1	1532	tags=20%, list=8%, signal=21%
FRASOR_RESPONSE_TO_ESTRADIOL_DN	FRASOR_RESPONSE_TO_ESTRADIOL_DN		71	-0.28724542	-1.0774189	0.31428573	0.5399366	1	2798	tags=30%, list=16%, signal=35%
CHIARETTI_T_ALL_RELAPSE_PROGNOSIS	CHIARETTI_T_ALL_RELAPSE_PROGNOSIS		16	-0.40441644	-1.0773906	0.36023054	0.5393325	1	2643	tags=56%, list=15%, signal=66%
MATZUK_SPERMATOCYTE	MATZUK_SPERMATOCYTE		61	-0.29012254	-1.077185	0.29602888	0.53919995	1	3730	tags=33%, list=21%, signal=41%
REACTOME_ION_CHANNEL_TRANSPORT	REACTOME_ION_CHANNEL_TRANSPORT		35	-0.3211089	-1.0771612	0.3060606	0.5385797	1	1770	tags=14%, list=10%, signal=16%
HANN_RESISTANCE_TO_BCL2_INHIBITOR_UP	HANN_RESISTANCE_TO_BCL2_INHIBITOR_UP		26	-0.3541908	-1.0765046	0.33333334	0.53959256	1	1885	tags=23%, list=10%, signal=26%
CHICAS_RB1_TARGETS_LOW_SERUM	CHICAS_RB1_TARGETS_LOW_SERUM		85	-0.27910933	-1.0761206	0.27542374	0.53987676	1	3768	tags=39%, list=21%, signal=49%
KIM_WT1_TARGETS_DN	KIM_WT1_TARGETS_DN		424	-0.22617517	-1.0753424	0.19117647	0.54134595	1	3251	tags=25%, list=18%, signal=29%
NADLER_OBESITY_UP	NADLER_OBESITY_UP		51	-0.3055989	-1.075264	0.32876712	0.5408615	1	3751	tags=33%, list=21%, signal=42%
SMID_BREAST_CANCER_RELAPSE_IN_BONE_DN	SMID_BREAST_CANCER_RELAPSE_IN_BONE_DN		229	-0.24121968	-1.0748516	0.25925925	0.541216	1	3012	tags=22%, list=17%, signal=26%
MULLIGHAN_NPM1_MUTATED_SIGNATURE_2_UP	MULLIGHAN_NPM1_MUTATED_SIGNATURE_2_UP		113	-0.2623374	-1.0729513	0.25560537	0.54540026	1	4456	tags=38%, list=25%, signal=50%
HUMMERICH_SKIN_CANCER_PROGRESSION_DN	HUMMERICH_SKIN_CANCER_PROGRESSION_DN		85	-0.2727036	-1.0723089	0.28448275	0.54635274	1	1034	tags=12%, list=6%, signal=12%
TCGA_GLIOBLASTOMA_COPY_NUMBER_UP	TCGA_GLIOBLASTOMA_COPY_NUMBER_UP		66	-0.2829845	-1.0700352	0.32234433	0.55153	1	2264	tags=18%, list=13%, signal=21%
FARMER_BREAST_CANCER_CLUSTER_4	FARMER_BREAST_CANCER_CLUSTER_4		19	-0.37797004	-1.0694182	0.38554215	0.5524836	1	942	tags=21%, list=5%, signal=22%
WHITEHURST_PACLITAXEL_SENSITIVITY	WHITEHURST_PACLITAXEL_SENSITIVITY		31	-0.32742894	-1.0686213	0.3546326	0.55379313	1	696	tags=13%, list=4%, signal=13%
PID_AURORA_A_PATHWAY	PID_AURORA_A_PATHWAY		30	-0.33322117	-1.068139	0.34796238	0.5544339	1	3240	tags=40%, list=18%, signal=49%
GARCIA_TARGETS_OF_FLI1_AND_DAX1_UP	GARCIA_TARGETS_OF_FLI1_AND_DAX1_UP		54	-0.29476234	-1.0678209	0.3148148	0.5545583	1	4175	tags=37%, list=23%, signal=48%
JIANG_HYPOXIA_NORMAL	JIANG_HYPOXIA_NORMAL		285	-0.22880091	-1.0669978	0.26229507	0.55615944	1	2533	tags=17%, list=14%, signal=20%
BORCZUK_MALIGNANT_MESOTHELIOMA_DN	BORCZUK_MALIGNANT_MESOTHELIOMA_DN		71	-0.28490713	-1.0659006	0.2964427	0.55825764	1	969	tags=13%, list=5%, signal=13%
REACTOME_TRANSFERRIN_ENDOCYTOSIS_AND_RECYCLING	REACTOME_TRANSFERRIN_ENDOCYTOSIS_AND_RECYCLING		22	-0.35639265	-1.065101	0.34848484	0.55962527	1	315	tags=9%, list=2%, signal=9%
GRAESSMANN_APOPTOSIS_BY_SERUM_DEPRIVATION_UP	GRAESSMANN_APOPTOSIS_BY_SERUM_DEPRIVATION_UP		448	-0.22821723	-1.064864	0.14705883	0.5595437	1	2881	tags=20%, list=16%, signal=23%
DER_IFN_GAMMA_RESPONSE_UP	DER_IFN_GAMMA_RESPONSE_UP		68	-0.28202957	-1.0644912	0.33596838	0.5597813	1	2593	tags=22%, list=14%, signal=26%
REACTOME_GENERATION_OF_SECOND_MESSENGER_MOLECULES	REACTOME_GENERATION_OF_SECOND_MESSENGER_MOLECULES		15	-0.40862533	-1.0644109	0.3705722	0.5592924	1	3310	tags=33%, list=18%, signal=41%
REACTOME_REGULATION_OF_GLUCOKINASE_BY_GLUCOKINASE_REGULATORY_PROTEIN	REACTOME_REGULATION_OF_GLUCOKINASE_BY_GLUCOKINASE_REGULATORY_PROTEIN		26	-0.3421228	-1.0643758	0.35690236	0.55869526	1	5048	tags=62%, list=28%, signal=85%
KEGG_ANTIGEN_PROCESSING_AND_PRESENTATION	KEGG_ANTIGEN_PROCESSING_AND_PRESENTATION		43	-0.30858314	-1.0632887	0.3423729	0.56081545	1	3310	tags=26%, list=18%, signal=31%
REACTOME_INSULIN_RECEPTOR_RECYCLING	REACTOME_INSULIN_RECEPTOR_RECYCLING		20	-0.3723475	-1.0626076	0.359882	0.56199896	1	2157	tags=20%, list=12%, signal=23%
BROWNE_HCMV_INFECTION_4HR_UP	BROWNE_HCMV_INFECTION_4HR_UP		43	-0.3116452	-1.0624241	0.35815603	0.56181186	1	2865	tags=26%, list=16%, signal=30%
NATSUME_RESPONSE_TO_INTERFERON_BETA_DN	NATSUME_RESPONSE_TO_INTERFERON_BETA_DN		47	-0.30317023	-1.0624169	0.35164836	0.5611406	1	1125	tags=9%, list=6%, signal=9%
CUI_GLUCOSE_DEPRIVATION	CUI_GLUCOSE_DEPRIVATION		53	-0.29595584	-1.0623404	0.32129964	0.5606553	1	1815	tags=23%, list=10%, signal=25%
BARIS_THYROID_CANCER_DN	BARIS_THYROID_CANCER_DN		51	-0.2997583	-1.0618333	0.33443707	0.56129473	1	2754	tags=29%, list=15%, signal=35%
REACTOME_NRAGE_SIGNALS_DEATH_THROUGH_JNK	REACTOME_NRAGE_SIGNALS_DEATH_THROUGH_JNK		40	-0.31502676	-1.0612649	0.3881119	0.5621716	1	3017	tags=30%, list=17%, signal=36%
SESTO_RESPONSE_TO_UV_C6	SESTO_RESPONSE_TO_UV_C6		39	-0.3098624	-1.0612372	0.36655948	0.56155837	1	782	tags=13%, list=4%, signal=13%
REACTOME_MHC_CLASS_II_ANTIGEN_PRESENTATION	REACTOME_MHC_CLASS_II_ANTIGEN_PRESENTATION		79	-0.27343357	-1.0611974	0.28991598	0.56097806	1	2433	tags=19%, list=13%, signal=22%
GARY_CD5_TARGETS_DN	GARY_CD5_TARGETS_DN		408	-0.2258933	-1.0610172	0.1969697	0.56076926	1	3775	tags=23%, list=21%, signal=28%
KEGG_AMINO_SUGAR_AND_NUCLEOTIDE_SUGAR_METABOLISM	KEGG_AMINO_SUGAR_AND_NUCLEOTIDE_SUGAR_METABOLISM		41	-0.30277058	-1.0608921	0.3215434	0.5604128	1	2798	tags=24%, list=16%, signal=29%
MOREAUX_B_LYMPHOCYTE_MATURATION_BY_TACI_DN	MOREAUX_B_LYMPHOCYTE_MATURATION_BY_TACI_DN		70	-0.2853797	-1.0603484	0.31111112	0.5611023	1	4268	tags=29%, list=24%, signal=37%
PASQUALUCCI_LYMPHOMA_BY_GC_STAGE_UP	PASQUALUCCI_LYMPHOMA_BY_GC_STAGE_UP		255	-0.2336144	-1.0601231	0.25490198	0.5609806	1	2109	tags=16%, list=12%, signal=18%
RAO_BOUND_BY_SALL4	RAO_BOUND_BY_SALL4		186	-0.23754637	-1.0598829	0.26490065	0.5609143	1	1520	tags=12%, list=8%, signal=13%
REACTOME_SLC_MEDIATED_TRANSMEMBRANE_TRANSPORT	REACTOME_SLC_MEDIATED_TRANSMEMBRANE_TRANSPORT		157	-0.24926253	-1.0595465	0.25433525	0.56116915	1	1205	tags=11%, list=7%, signal=12%
LEE_LIVER_CANCER_MYC_TGFA_DN	LEE_LIVER_CANCER_MYC_TGFA_DN		37	-0.3169631	-1.0594935	0.35555556	0.560626	1	1811	tags=19%, list=10%, signal=21%
YUAN_ZNF143_PARTNERS	YUAN_ZNF143_PARTNERS		21	-0.37487605	-1.0590409	0.37982196	0.5611102	1	3755	tags=33%, list=21%, signal=42%
NING_CHRONIC_OBSTRUCTIVE_PULMONARY_DISEASE_DN	NING_CHRONIC_OBSTRUCTIVE_PULMONARY_DISEASE_DN		111	-0.25714737	-1.0584348	0.29533678	0.56212366	1	1561	tags=11%, list=9%, signal=12%
REACTOME_MRNA_SPLICING	REACTOME_MRNA_SPLICING		106	-0.25930652	-1.0584126	0.2991453	0.56149215	1	5098	tags=41%, list=28%, signal=56%
BIOCARTA_HCMV_PATHWAY	BIOCARTA_HCMV_PATHWAY		16	-0.39109343	-1.058017	0.3581662	0.56181633	1	1347	tags=13%, list=7%, signal=13%
MIKKELSEN_MCV6_LCP_WITH_H3K4ME3	MIKKELSEN_MCV6_LCP_WITH_H3K4ME3		102	-0.26037753	-1.0574151	0.34615386	0.5626899	1	2371	tags=22%, list=13%, signal=25%
FARMER_BREAST_CANCER_APOCRINE_VS_LUMINAL	FARMER_BREAST_CANCER_APOCRINE_VS_LUMINAL		277	-0.23137157	-1.0573606	0.26881722	0.56215566	1	1917	tags=14%, list=11%, signal=16%
TURASHVILI_BREAST_LOBULAR_CARCINOMA_VS_LOBULAR_NORMAL_DN	TURASHVILI_BREAST_LOBULAR_CARCINOMA_VS_LOBULAR_NORMAL_DN		63	-0.28224295	-1.0571027	0.33079848	0.56216544	1	2402	tags=25%, list=13%, signal=29%
SHETH_LIVER_CANCER_VS_TXNIP_LOSS_PAM4	SHETH_LIVER_CANCER_VS_TXNIP_LOSS_PAM4		185	-0.24047172	-1.0570898	0.27564102	0.56151706	1	2826	tags=25%, list=16%, signal=30%
WAMUNYOKOLI_OVARIAN_CANCER_LMP_UP	WAMUNYOKOLI_OVARIAN_CANCER_LMP_UP		221	-0.23992601	-1.057007	0.23880596	0.56107247	1	1632	tags=11%, list=9%, signal=12%
SMITH_LIVER_CANCER	SMITH_LIVER_CANCER		41	-0.3090631	-1.0567371	0.36	0.5611096	1	3240	tags=32%, list=18%, signal=39%
KLEIN_TARGETS_OF_BCR_ABL1_FUSION	KLEIN_TARGETS_OF_BCR_ABL1_FUSION		25	-0.3428184	-1.055552	0.37195122	0.5637511	1	1206	tags=20%, list=7%, signal=21%
FLECHNER_BIOPSY_KIDNEY_TRANSPLANT_REJECTED_VS_OK_UP	FLECHNER_BIOPSY_KIDNEY_TRANSPLANT_REJECTED_VS_OK_UP		51	-0.29419002	-1.0552381	0.3309091	0.5639401	1	3850	tags=37%, list=21%, signal=47%
DING_LUNG_CANCER_BY_MUTATION_RATE	DING_LUNG_CANCER_BY_MUTATION_RATE		18	-0.3657044	-1.0538305	0.39178082	0.5670666	1	1728	tags=28%, list=10%, signal=31%
NUMATA_CSF3_SIGNALING_VIA_STAT3	NUMATA_CSF3_SIGNALING_VIA_STAT3		19	-0.3620326	-1.0517694	0.3897281	0.5719878	1	633	tags=16%, list=4%, signal=16%
PID_CXCR3_PATHWAY	PID_CXCR3_PATHWAY		37	-0.31386673	-1.0517634	0.3538961	0.5713125	1	2592	tags=19%, list=14%, signal=22%
KLEIN_PRIMARY_EFFUSION_LYMPHOMA_UP	KLEIN_PRIMARY_EFFUSION_LYMPHOMA_UP		44	-0.30417043	-1.0515468	0.35664335	0.57123196	1	3443	tags=25%, list=19%, signal=31%
REACTOME_SYNTHESIS_AND_INTERCONVERSION_OF_NUCLEOTIDE_DI_AND_TRIPHOSPHATES	REACTOME_SYNTHESIS_AND_INTERCONVERSION_OF_NUCLEOTIDE_DI_AND_TRIPHOSPHATES		17	-0.37789887	-1.0506332	0.3710145	0.572943	1	3530	tags=41%, list=20%, signal=51%
RUAN_RESPONSE_TO_TNF_TROGLITAZONE_DN	RUAN_RESPONSE_TO_TNF_TROGLITAZONE_DN		33	-0.3232622	-1.0502077	0.33435583	0.5733709	1	2857	tags=24%, list=16%, signal=29%
ZEMBUTSU_SENSITIVITY_TO_DOXORUBICIN	ZEMBUTSU_SENSITIVITY_TO_DOXORUBICIN		15	-0.4034103	-1.0493431	0.38243628	0.5751433	1	2098	tags=27%, list=12%, signal=30%
IGLESIAS_E2F_TARGETS_UP	IGLESIAS_E2F_TARGETS_UP		130	-0.24671592	-1.0490547	0.3761468	0.5751812	1	3025	tags=25%, list=17%, signal=30%
PID_INTEGRIN2_PATHWAY	PID_INTEGRIN2_PATHWAY		17	-0.3793018	-1.0488214	0.3983051	0.57512426	1	381	tags=12%, list=2%, signal=12%
FAELT_B_CLL_WITH_VH3_21_UP	FAELT_B_CLL_WITH_VH3_21_UP		40	-0.30973437	-1.0486277	0.3540146	0.57497555	1	2651	tags=20%, list=15%, signal=23%
WATTEL_AUTONOMOUS_THYROID_ADENOMA_UP	WATTEL_AUTONOMOUS_THYROID_ADENOMA_UP		58	-0.28944382	-1.0481659	0.33215547	0.575574	1	3010	tags=28%, list=17%, signal=33%
MARTENS_BOUND_BY_PML_RARA_FUSION	MARTENS_BOUND_BY_PML_RARA_FUSION		399	-0.22434196	-1.0470858	0.24691358	0.5777857	1	1255	tags=11%, list=7%, signal=12%
SIG_CD40PATHWAYMAP	SIG_CD40PATHWAYMAP		34	-0.31299764	-1.0447952	0.3553459	0.58328885	1	1742	tags=18%, list=10%, signal=19%
HOEGERKORP_CD44_TARGETS_TEMPORAL_DN	HOEGERKORP_CD44_TARGETS_TEMPORAL_DN		21	-0.36288026	-1.0441035	0.38323355	0.5844941	1	2572	tags=29%, list=14%, signal=33%
NAGY_TFTC_COMPONENTS_HUMAN	NAGY_TFTC_COMPONENTS_HUMAN		19	-0.36317122	-1.0438571	0.4	0.58449316	1	3429	tags=26%, list=19%, signal=32%
SHETH_LIVER_CANCER_VS_TXNIP_LOSS_PAM1	SHETH_LIVER_CANCER_VS_TXNIP_LOSS_PAM1		189	-0.23443903	-1.0432094	0.33333334	0.5855337	1	1951	tags=17%, list=11%, signal=19%
CHNG_MULTIPLE_MYELOMA_HYPERPLOID_UP	CHNG_MULTIPLE_MYELOMA_HYPERPLOID_UP		50	-0.29437444	-1.0417366	0.35714287	0.58882046	1	10843	tags=96%, list=60%, signal=240%
BURTON_ADIPOGENESIS_6	BURTON_ADIPOGENESIS_6		158	-0.2387266	-1.0413222	0.34911242	0.589259	1	3503	tags=23%, list=19%, signal=28%
REACTOME_NUCLEAR_RECEPTOR_TRANSCRIPTION_PATHWAY	REACTOME_NUCLEAR_RECEPTOR_TRANSCRIPTION_PATHWAY		34	-0.3196745	-1.0411187	0.38062283	0.58912665	1	1372	tags=18%, list=8%, signal=19%
HEIDENBLAD_AMPLICON_8Q24_UP	HEIDENBLAD_AMPLICON_8Q24_UP		34	-0.30983573	-1.0409151	0.35555556	0.5890083	1	2570	tags=26%, list=14%, signal=31%
HAHTOLA_MYCOSIS_FUNGOIDES_CD4_DN	HAHTOLA_MYCOSIS_FUNGOIDES_CD4_DN		109	-0.25292245	-1.0406622	0.37198067	0.58903885	1	3411	tags=19%, list=19%, signal=24%
FERREIRA_EWINGS_SARCOMA_UNSTABLE_VS_STABLE_DN	FERREIRA_EWINGS_SARCOMA_UNSTABLE_VS_STABLE_DN		80	-0.26645687	-1.0402936	0.3677686	0.5893832	1	3082	tags=26%, list=17%, signal=32%
YAGI_AML_WITH_11Q23_REARRANGED	YAGI_AML_WITH_11Q23_REARRANGED		301	-0.22249512	-1.0398948	0.26530612	0.5898208	1	2654	tags=18%, list=15%, signal=20%
KEGG_GLUTATHIONE_METABOLISM	KEGG_GLUTATHIONE_METABOLISM		40	-0.30585098	-1.0398335	0.37461302	0.58926845	1	2539	tags=25%, list=14%, signal=29%
BROWNE_HCMV_INFECTION_1HR_DN	BROWNE_HCMV_INFECTION_1HR_DN		176	-0.24004309	-1.038184	0.34057972	0.5932857	1	2866	tags=21%, list=16%, signal=25%
LEONARD_HYPOXIA	LEONARD_HYPOXIA		44	-0.3002522	-1.0365515	0.375	0.59693456	1	2759	tags=34%, list=15%, signal=40%
PID_ARF6_PATHWAY	PID_ARF6_PATHWAY		33	-0.3240459	-1.0365477	0.3762712	0.59624386	1	1613	tags=15%, list=9%, signal=17%
GUTIERREZ_CHRONIC_LYMPHOCYTIC_LEUKEMIA_DN	GUTIERREZ_CHRONIC_LYMPHOCYTIC_LEUKEMIA_DN		47	-0.28699523	-1.0363436	0.4	0.5961107	1	1167	tags=15%, list=6%, signal=16%
ODONNELL_METASTASIS_DN	ODONNELL_METASTASIS_DN		19	-0.3674231	-1.0348368	0.36842105	0.59973466	1	3367	tags=42%, list=19%, signal=52%
LU_EZH2_TARGETS_UP	LU_EZH2_TARGETS_UP		249	-0.22795068	-1.0346955	0.31730768	0.5994485	1	3306	tags=26%, list=18%, signal=31%
KIM_MYCL1_AMPLIFICATION_TARGETS_DN	KIM_MYCL1_AMPLIFICATION_TARGETS_DN		19	-0.36225998	-1.0346504	0.39237058	0.59885204	1	3448	tags=42%, list=19%, signal=52%
DORMOY_ELAVL1_TARGETS	DORMOY_ELAVL1_TARGETS		16	-0.38277704	-1.0342963	0.4089636	0.59913397	1	3963	tags=38%, list=22%, signal=48%
DOANE_BREAST_CANCER_CLASSES_DN	DOANE_BREAST_CANCER_CLASSES_DN		30	-0.3211136	-1.0335639	0.4117647	0.60049343	1	1780	tags=17%, list=10%, signal=18%
LINDVALL_IMMORTALIZED_BY_TERT_UP	LINDVALL_IMMORTALIZED_BY_TERT_UP		62	-0.27973428	-1.0324565	0.36329588	0.60289633	1	1671	tags=19%, list=9%, signal=21%
MA_MYELOID_DIFFERENTIATION_UP	MA_MYELOID_DIFFERENTIATION_UP		33	-0.31021932	-1.0286254	0.40849674	0.6130538	1	3037	tags=30%, list=17%, signal=36%
VANTVEER_BREAST_CANCER_ESR1_UP	VANTVEER_BREAST_CANCER_ESR1_UP		152	-0.24028589	-1.0284566	0.36868685	0.612853	1	3411	tags=26%, list=19%, signal=32%
TURASHVILI_BREAST_DUCTAL_CARCINOMA_VS_LOBULAR_NORMAL_UP	TURASHVILI_BREAST_DUCTAL_CARCINOMA_VS_LOBULAR_NORMAL_UP		69	-0.2699807	-1.0278383	0.4015748	0.61393595	1	2666	tags=25%, list=15%, signal=29%
HATADA_METHYLATED_IN_LUNG_CANCER_DN	HATADA_METHYLATED_IN_LUNG_CANCER_DN		21	-0.3563231	-1.0275338	0.41269842	0.6141032	1	1095	tags=19%, list=6%, signal=20%
HOLLMANN_APOPTOSIS_VIA_CD40_DN	HOLLMANN_APOPTOSIS_VIA_CD40_DN		227	-0.23107442	-1.0269117	0.34586465	0.6150863	1	3391	tags=26%, list=19%, signal=32%
REACTOME_CIRCADIAN_REPRESSION_OF_EXPRESSION_BY_REV_ERBA	REACTOME_CIRCADIAN_REPRESSION_OF_EXPRESSION_BY_REV_ERBA		22	-0.35344395	-1.0258534	0.4159544	0.61737657	1	835	tags=18%, list=5%, signal=19%
REACTOME_CELL_DEATH_SIGNALLING_VIA_NRAGE_NRIF_AND_NADE	REACTOME_CELL_DEATH_SIGNALLING_VIA_NRAGE_NRIF_AND_NADE		55	-0.28039953	-1.0249965	0.4160584	0.6191071	1	3017	tags=27%, list=17%, signal=33%
GROSS_HYPOXIA_VIA_ELK3_UP	GROSS_HYPOXIA_VIA_ELK3_UP		197	-0.23196474	-1.024961	0.35416666	0.61849284	1	3568	tags=27%, list=20%, signal=33%
JAATINEN_HEMATOPOIETIC_STEM_CELL_UP	JAATINEN_HEMATOPOIETIC_STEM_CELL_UP		270	-0.22718282	-1.0249071	0.3488372	0.61790854	1	3645	tags=25%, list=20%, signal=31%
IVANOVA_HEMATOPOIESIS_STEM_CELL_SHORT_TERM	IVANOVA_HEMATOPOIESIS_STEM_CELL_SHORT_TERM		27	-0.3331017	-1.0244097	0.41420117	0.61863476	1	2351	tags=19%, list=13%, signal=21%
REACTOME_NEP_NS2_INTERACTS_WITH_THE_CELLULAR_EXPORT_MACHINERY	REACTOME_NEP_NS2_INTERACTS_WITH_THE_CELLULAR_EXPORT_MACHINERY		27	-0.33396614	-1.0237868	0.4024768	0.6197848	1	5048	tags=59%, list=28%, signal=82%
FONTAINE_FOLLICULAR_THYROID_ADENOMA_UP	FONTAINE_FOLLICULAR_THYROID_ADENOMA_UP		65	-0.2684639	-1.0236775	0.39923954	0.6193747	1	2451	tags=25%, list=14%, signal=28%
REN_ALVEOLAR_RHABDOMYOSARCOMA_UP	REN_ALVEOLAR_RHABDOMYOSARCOMA_UP		78	-0.26269943	-1.0229093	0.3846154	0.6208558	1	1713	tags=14%, list=9%, signal=16%
LEE_DIFFERENTIATING_T_LYMPHOCYTE	LEE_DIFFERENTIATING_T_LYMPHOCYTE		141	-0.24270797	-1.0222465	0.39893618	0.6220796	1	2460	tags=20%, list=14%, signal=23%
KENNY_CTNNB1_TARGETS_DN	KENNY_CTNNB1_TARGETS_DN		49	-0.29241657	-1.0220293	0.39344263	0.62198836	1	943	tags=8%, list=5%, signal=9%
SCHAEFFER_SOX9_TARGETS_IN_PROSTATE_DEVELOPMENT_DN	SCHAEFFER_SOX9_TARGETS_IN_PROSTATE_DEVELOPMENT_DN		41	-0.30480072	-1.0213453	0.39115646	0.62330306	1	3459	tags=32%, list=19%, signal=39%
BIOCARTA_PROTEASOME_PATHWAY	BIOCARTA_PROTEASOME_PATHWAY		28	-0.32900217	-1.0212226	0.40184048	0.6229056	1	12113	tags=100%, list=67%, signal=304%
JAZAG_TGFB1_SIGNALING_VIA_SMAD4_DN	JAZAG_TGFB1_SIGNALING_VIA_SMAD4_DN		47	-0.29057592	-1.0203242	0.41216215	0.62467575	1	1355	tags=19%, list=8%, signal=21%
KEGG_BASAL_TRANSCRIPTION_FACTORS	KEGG_BASAL_TRANSCRIPTION_FACTORS		33	-0.31509832	-1.0200839	0.42414862	0.62463367	1	3429	tags=24%, list=19%, signal=30%
SPIELMAN_LYMPHOBLAST_EUROPEAN_VS_ASIAN_UP	SPIELMAN_LYMPHOBLAST_EUROPEAN_VS_ASIAN_UP		453	-0.21506947	-1.0191326	0.30882353	0.62672263	1	3576	tags=24%, list=20%, signal=30%
RAMASWAMY_METASTASIS_DN	RAMASWAMY_METASTASIS_DN		48	-0.28881043	-1.019115	0.4180602	0.6260625	1	1240	tags=13%, list=7%, signal=13%
CREIGHTON_ENDOCRINE_THERAPY_RESISTANCE_1	CREIGHTON_ENDOCRINE_THERAPY_RESISTANCE_1		457	-0.21433316	-1.0188227	0.33333334	0.6261209	1	2766	tags=20%, list=15%, signal=23%
URS_ADIPOCYTE_DIFFERENTIATION_UP	URS_ADIPOCYTE_DIFFERENTIATION_UP		56	-0.27184483	-1.0185674	0.41666666	0.62615615	1	1409	tags=18%, list=8%, signal=19%
HOLLEMAN_VINCRISTINE_RESISTANCE_B_ALL_UP	HOLLEMAN_VINCRISTINE_RESISTANCE_B_ALL_UP		36	-0.30213147	-1.018168	0.39556962	0.62664765	1	581	tags=8%, list=3%, signal=9%
YOSHIOKA_LIVER_CANCER_EARLY_RECURRENCE_UP	YOSHIOKA_LIVER_CANCER_EARLY_RECURRENCE_UP		32	-0.32081056	-1.0176371	0.4051447	0.627389	1	2761	tags=19%, list=15%, signal=22%
KEGG_PEROXISOME	KEGG_PEROXISOME		72	-0.26858637	-1.0174706	0.40697673	0.6271672	1	4076	tags=39%, list=23%, signal=50%
CHEMELLO_SOLEUS_VS_EDL_MYOFIBERS_UP	CHEMELLO_SOLEUS_VS_EDL_MYOFIBERS_UP		20	-0.35461602	-1.0174193	0.40634006	0.62659365	1	875	tags=20%, list=5%, signal=21%
PROVENZANI_METASTASIS_DN	PROVENZANI_METASTASIS_DN		122	-0.24537887	-1.0168171	0.4162896	0.62767357	1	2066	tags=16%, list=11%, signal=18%
KEGG_GLYCEROLIPID_METABOLISM	KEGG_GLYCEROLIPID_METABOLISM		40	-0.29659325	-1.016004	0.4214047	0.6293723	1	2760	tags=25%, list=15%, signal=29%
KEGG_VIRAL_MYOCARDITIS	KEGG_VIRAL_MYOCARDITIS		43	-0.29526818	-1.0154219	0.40136054	0.6303771	1	953	tags=9%, list=5%, signal=10%
SHIN_B_CELL_LYMPHOMA_CLUSTER_8	SHIN_B_CELL_LYMPHOMA_CLUSTER_8		28	-0.3236838	-1.0151067	0.41324922	0.6305511	1	2562	tags=36%, list=14%, signal=42%
CHEOK_RESPONSE_TO_MERCAPTOPURINE_AND_LD_MTX_DN	CHEOK_RESPONSE_TO_MERCAPTOPURINE_AND_LD_MTX_DN		15	-0.3822423	-1.0126377	0.44126076	0.6368766	1	2667	tags=33%, list=15%, signal=39%
ODONNELL_METASTASIS_UP	ODONNELL_METASTASIS_UP		55	-0.27659544	-1.0121118	0.39930555	0.63776827	1	1303	tags=15%, list=7%, signal=16%
RIGGINS_TAMOXIFEN_RESISTANCE_UP	RIGGINS_TAMOXIFEN_RESISTANCE_UP		55	-0.2767099	-1.0103691	0.3979239	0.64217633	1	1407	tags=15%, list=8%, signal=16%
RASHI_RESPONSE_TO_IONIZING_RADIATION_3	RASHI_RESPONSE_TO_IONIZING_RADIATION_3		43	-0.29445916	-1.0101568	0.43448275	0.64210856	1	2233	tags=21%, list=12%, signal=24%
FORTSCHEGGER_PHF8_TARGETS_UP	FORTSCHEGGER_PHF8_TARGETS_UP		249	-0.2207926	-1.0101289	0.40833333	0.6414645	1	2701	tags=23%, list=15%, signal=27%
RADMACHER_AML_PROGNOSIS	RADMACHER_AML_PROGNOSIS		63	-0.26689562	-1.0082643	0.43129772	0.64615697	1	1574	tags=13%, list=9%, signal=14%
MEDINA_SMARCA4_TARGETS	MEDINA_SMARCA4_TARGETS		38	-0.30369362	-1.007886	0.43492064	0.64650226	1	3050	tags=24%, list=17%, signal=28%
JIANG_HYPOXIA_VIA_VHL	JIANG_HYPOXIA_VIA_VHL		34	-0.30630445	-1.0077724	0.41744548	0.6461275	1	4139	tags=32%, list=23%, signal=42%
TURASHVILI_BREAST_DUCTAL_CARCINOMA_VS_DUCTAL_NORMAL_UP	TURASHVILI_BREAST_DUCTAL_CARCINOMA_VS_DUCTAL_NORMAL_UP		39	-0.30325416	-1.0074486	0.46625766	0.64630824	1	2405	tags=28%, list=13%, signal=32%
WAKABAYASHI_ADIPOGENESIS_PPARG_RXRA_BOUND_WITH_H4K20ME1_MARK	WAKABAYASHI_ADIPOGENESIS_PPARG_RXRA_BOUND_WITH_H4K20ME1_MARK		133	-0.24093916	-1.0070214	0.42307693	0.6468349	1	4748	tags=38%, list=26%, signal=51%
GUO_HEX_TARGETS_UP	GUO_HEX_TARGETS_UP		77	-0.26106042	-1.0070009	0.3976834	0.64617676	1	2162	tags=16%, list=12%, signal=18%
VANDESLUIS_NORMAL_EMBRYOS_DN	VANDESLUIS_NORMAL_EMBRYOS_DN		17	-0.36677217	-1.0065674	0.42647058	0.64671713	1	557	tags=12%, list=3%, signal=12%
KYNG_DNA_DAMAGE_BY_GAMMA_RADIATION	KYNG_DNA_DAMAGE_BY_GAMMA_RADIATION		61	-0.26621428	-1.006091	0.41577062	0.64743763	1	1736	tags=13%, list=10%, signal=14%
REACTOME_SIGNALING_BY_FGFR_MUTANTS	REACTOME_SIGNALING_BY_FGFR_MUTANTS		35	-0.30605218	-1.006013	0.4180602	0.6469654	1	3175	tags=29%, list=18%, signal=35%
FOURNIER_ACINAR_DEVELOPMENT_LATE_DN	FOURNIER_ACINAR_DEVELOPMENT_LATE_DN		20	-0.35539392	-1.0040755	0.44598338	0.65175205	1	3739	tags=55%, list=21%, signal=69%
BERENJENO_TRANSFORMED_BY_RHOA_DN	BERENJENO_TRANSFORMED_BY_RHOA_DN		372	-0.21167481	-1.0036837	0.45833334	0.65213966	1	2049	tags=13%, list=11%, signal=15%
BAELDE_DIABETIC_NEPHROPATHY_DN	BAELDE_DIABETIC_NEPHROPATHY_DN		397	-0.2115039	-1.0033118	0.47435898	0.6525673	1	1426	tags=9%, list=8%, signal=10%
REACTOME_NCAM1_INTERACTIONS	REACTOME_NCAM1_INTERACTIONS		33	-0.31556225	-1.002983	0.42192692	0.6527632	1	1865	tags=18%, list=10%, signal=20%
YAGI_AML_WITH_T_8_21_TRANSLOCATION	YAGI_AML_WITH_T_8_21_TRANSLOCATION		311	-0.2172548	-1.002151	0.41666666	0.65439725	1	3459	tags=23%, list=19%, signal=29%
MALONEY_RESPONSE_TO_17AAG_UP	MALONEY_RESPONSE_TO_17AAG_UP		36	-0.30011564	-1.0018266	0.42662117	0.65457803	1	2834	tags=19%, list=16%, signal=23%
LEIN_MIDBRAIN_MARKERS	LEIN_MIDBRAIN_MARKERS		65	-0.26364872	-0.99964035	0.38955823	0.6601006	1	3224	tags=29%, list=18%, signal=35%
KORKOLA_TERATOMA	KORKOLA_TERATOMA		32	-0.31595165	-0.99954367	0.4281525	0.6596325	1	3288	tags=50%, list=18%, signal=61%
CHANG_CORE_SERUM_RESPONSE_UP	CHANG_CORE_SERUM_RESPONSE_UP		204	-0.22724603	-0.99888694	0.45341614	0.66083914	1	4199	tags=35%, list=23%, signal=45%
YAO_TEMPORAL_RESPONSE_TO_PROGESTERONE_CLUSTER_0	YAO_TEMPORAL_RESPONSE_TO_PROGESTERONE_CLUSTER_0		70	-0.26125264	-0.9962039	0.46	0.6680074	1	2089	tags=21%, list=12%, signal=24%
KEGG_RENAL_CELL_CARCINOMA	KEGG_RENAL_CELL_CARCINOMA		67	-0.26541144	-0.9955275	0.45818183	0.6692809	1	2661	tags=21%, list=15%, signal=24%
SHEDDEN_LUNG_CANCER_GOOD_SURVIVAL_A5	SHEDDEN_LUNG_CANCER_GOOD_SURVIVAL_A5		63	-0.2656047	-0.9942789	0.47118643	0.67210555	1	3153	tags=30%, list=17%, signal=36%
REACTOME_TIGHT_JUNCTION_INTERACTIONS	REACTOME_TIGHT_JUNCTION_INTERACTIONS		15	-0.36539134	-0.9922594	0.4875346	0.6773532	1	2010	tags=27%, list=11%, signal=30%
YANG_BREAST_CANCER_ESR1_BULK_UP	YANG_BREAST_CANCER_ESR1_BULK_UP		25	-0.32465315	-0.9922475	0.44610777	0.676645	1	3824	tags=48%, list=21%, signal=61%
KEGG_TYROSINE_METABOLISM	KEGG_TYROSINE_METABOLISM		30	-0.3111988	-0.9913821	0.45980707	0.6785502	1	797	tags=10%, list=4%, signal=10%
PID_RXR_VDR_PATHWAY	PID_RXR_VDR_PATHWAY		23	-0.3316151	-0.98905396	0.4359756	0.6846858	1	767	tags=17%, list=4%, signal=18%
CHARAFE_BREAST_CANCER_BASAL_VS_MESENCHYMAL_DN	CHARAFE_BREAST_CANCER_BASAL_VS_MESENCHYMAL_DN		49	-0.2788276	-0.9888095	0.46779662	0.6846142	1	1642	tags=20%, list=9%, signal=22%
RASHI_RESPONSE_TO_IONIZING_RADIATION_6	RASHI_RESPONSE_TO_IONIZING_RADIATION_6		60	-0.2698332	-0.9869534	0.4377224	0.68926144	1	1489	tags=12%, list=8%, signal=13%
PID_ECADHERIN_STABILIZATION_PATHWAY	PID_ECADHERIN_STABILIZATION_PATHWAY		39	-0.29430875	-0.98564285	0.4591195	0.6924105	1	2187	tags=15%, list=12%, signal=17%
AIGNER_ZEB1_TARGETS	AIGNER_ZEB1_TARGETS		18	-0.35606185	-0.9855821	0.4894895	0.69183797	1	953	tags=28%, list=5%, signal=29%
PID_MYC_ACTIV_PATHWAY	PID_MYC_ACTIV_PATHWAY		76	-0.25332144	-0.9849598	0.47717842	0.69287044	1	3158	tags=25%, list=18%, signal=30%
ZHONG_SECRETOME_OF_LUNG_CANCER_AND_MACROPHAGE	ZHONG_SECRETOME_OF_LUNG_CANCER_AND_MACROPHAGE		70	-0.25872084	-0.98448575	0.48679245	0.69355255	1	3473	tags=19%, list=19%, signal=23%
CAMPS_COLON_CANCER_COPY_NUMBER_DN	CAMPS_COLON_CANCER_COPY_NUMBER_DN		36	-0.2984521	-0.98367643	0.51724136	0.6951189	1	1049	tags=19%, list=6%, signal=21%
GRADE_COLON_VS_RECTAL_CANCER_UP	GRADE_COLON_VS_RECTAL_CANCER_UP		30	-0.30932337	-0.9825082	0.49006623	0.6976672	1	2032	tags=23%, list=11%, signal=26%
HAHTOLA_MYCOSIS_FUNGOIDES_SKIN_DN	HAHTOLA_MYCOSIS_FUNGOIDES_SKIN_DN		20	-0.342581	-0.9824552	0.48773006	0.69705003	1	1607	tags=20%, list=9%, signal=22%
NIELSEN_MALIGNAT_FIBROUS_HISTIOCYTOMA_DN	NIELSEN_MALIGNAT_FIBROUS_HISTIOCYTOMA_DN		17	-0.36159387	-0.9810397	0.47774482	0.7006574	1	4456	tags=41%, list=25%, signal=55%
REACTOME_PTM_GAMMA_CARBOXYLATION_HYPUSINE_FORMATION_AND_ARYLSULFATASE_ACTIVATION	REACTOME_PTM_GAMMA_CARBOXYLATION_HYPUSINE_FORMATION_AND_ARYLSULFATASE_ACTIVATION		18	-0.35039717	-0.98099786	0.49326146	0.7000279	1	4	tags=6%, list=0%, signal=6%
RODWELL_AGING_KIDNEY_DN	RODWELL_AGING_KIDNEY_DN		123	-0.23965701	-0.9807288	0.49751243	0.70008713	1	1912	tags=12%, list=11%, signal=14%
KIM_MYC_AMPLIFICATION_TARGETS_UP	KIM_MYC_AMPLIFICATION_TARGETS_UP		182	-0.22506188	-0.9805398	0.47945204	0.6998972	1	4057	tags=26%, list=22%, signal=34%
KEEN_RESPONSE_TO_ROSIGLITAZONE_UP	KEEN_RESPONSE_TO_ROSIGLITAZONE_UP		35	-0.29998466	-0.98023486	0.47213113	0.70009017	1	1874	tags=23%, list=10%, signal=25%
LI_DCP2_BOUND_MRNA	LI_DCP2_BOUND_MRNA		87	-0.24669334	-0.97953284	0.5163934	0.7014727	1	4492	tags=25%, list=25%, signal=34%
SENGUPTA_EBNA1_ANTICORRELATED	SENGUPTA_EBNA1_ANTICORRELATED		127	-0.2397951	-0.9794845	0.47692308	0.7008514	1	3096	tags=28%, list=17%, signal=33%
LOPEZ_MBD_TARGETS_IMPRINTED_AND_X_LINKED	LOPEZ_MBD_TARGETS_IMPRINTED_AND_X_LINKED		16	-0.36073577	-0.97914356	0.46194226	0.70106786	1	1585	tags=13%, list=9%, signal=14%
AMUNDSON_POOR_SURVIVAL_AFTER_GAMMA_RADIATION_2G	AMUNDSON_POOR_SURVIVAL_AFTER_GAMMA_RADIATION_2G		150	-0.22972652	-0.9785087	0.56790125	0.7021638	1	3568	tags=35%, list=20%, signal=44%
REACTOME_SYNTHESIS_OF_PA	REACTOME_SYNTHESIS_OF_PA		18	-0.34782252	-0.978156	0.4849315	0.70242876	1	2760	tags=33%, list=15%, signal=39%
CHEN_NEUROBLASTOMA_COPY_NUMBER_GAINS	CHEN_NEUROBLASTOMA_COPY_NUMBER_GAINS		42	-0.28597766	-0.9780501	0.4679487	0.7019725	1	2117	tags=19%, list=12%, signal=22%
LAMB_CCND1_TARGETS	LAMB_CCND1_TARGETS		17	-0.3536069	-0.9776789	0.4649123	0.7023325	1	2592	tags=24%, list=14%, signal=27%
VALK_AML_CLUSTER_8	VALK_AML_CLUSTER_8		20	-0.3349626	-0.9776399	0.5111732	0.7017163	1	1024	tags=15%, list=6%, signal=16%
BORCZUK_MALIGNANT_MESOTHELIOMA_UP	BORCZUK_MALIGNANT_MESOTHELIOMA_UP		296	-0.20779118	-0.9766518	0.59016395	0.703957	1	4613	tags=31%, list=26%, signal=42%
MARTINEZ_RB1_AND_TP53_TARGETS_DN	MARTINEZ_RB1_AND_TP53_TARGETS_DN		480	-0.19674008	-0.9762978	0.5777778	0.70428425	1	3723	tags=26%, list=21%, signal=32%
STAMBOLSKY_RESPONSE_TO_VITAMIN_D3_DN	STAMBOLSKY_RESPONSE_TO_VITAMIN_D3_DN		20	-0.34338507	-0.97584337	0.4934037	0.70488244	1	1112	tags=15%, list=6%, signal=16%
ROVERSI_GLIOMA_LOH_REGIONS	ROVERSI_GLIOMA_LOH_REGIONS		34	-0.29716355	-0.9752213	0.46223566	0.70602524	1	3763	tags=29%, list=21%, signal=37%
KEGG_DRUG_METABOLISM_OTHER_ENZYMES	KEGG_DRUG_METABOLISM_OTHER_ENZYMES		21	-0.33330604	-0.9738003	0.47058824	0.70937264	1	3381	tags=38%, list=19%, signal=47%
REACTOME_METABOLISM_OF_AMINO_ACIDS_AND_DERIVATIVES	REACTOME_METABOLISM_OF_AMINO_ACIDS_AND_DERIVATIVES		161	-0.22683299	-0.97358125	0.5480226	0.7092296	1	3260	tags=22%, list=18%, signal=26%
YIH_RESPONSE_TO_ARSENITE_C3	YIH_RESPONSE_TO_ARSENITE_C3		35	-0.28780213	-0.9724025	0.4983165	0.71186274	1	2148	tags=23%, list=12%, signal=26%
TSENG_ADIPOGENIC_POTENTIAL_DN	TSENG_ADIPOGENIC_POTENTIAL_DN		39	-0.28378808	-0.97191936	0.51602566	0.71255183	1	2629	tags=26%, list=15%, signal=30%
PID_RAC1_PATHWAY	PID_RAC1_PATHWAY		47	-0.2794532	-0.97080714	0.49642858	0.7149766	1	1220	tags=11%, list=7%, signal=11%
REACTOME_NEGATIVE_REGULATION_OF_FGFR_SIGNALING	REACTOME_NEGATIVE_REGULATION_OF_FGFR_SIGNALING		26	-0.31288132	-0.97066325	0.48387095	0.71470916	1	1347	tags=15%, list=7%, signal=17%
OUYANG_PROSTATE_CANCER_PROGRESSION_DN	OUYANG_PROSTATE_CANCER_PROGRESSION_DN		18	-0.339606	-0.9703608	0.5043988	0.71482474	1	1347	tags=22%, list=7%, signal=24%
POMEROY_MEDULLOBLASTOMA_PROGNOSIS_DN	POMEROY_MEDULLOBLASTOMA_PROGNOSIS_DN		43	-0.28511345	-0.9702195	0.5220339	0.7145083	1	2649	tags=19%, list=15%, signal=22%
THEODOROU_MAMMARY_TUMORIGENESIS	THEODOROU_MAMMARY_TUMORIGENESIS		18	-0.343557	-0.969604	0.47683924	0.71550536	1	667	tags=17%, list=4%, signal=17%
PID_HEDGEHOG_GLI_PATHWAY	PID_HEDGEHOG_GLI_PATHWAY		46	-0.27390462	-0.96958554	0.5066225	0.7148107	1	3403	tags=26%, list=19%, signal=32%
REACTOME_GLYCOLYSIS	REACTOME_GLYCOLYSIS		23	-0.31886923	-0.9692531	0.46964857	0.7150664	1	3164	tags=35%, list=18%, signal=42%
SCHAEFFER_PROSTATE_DEVELOPMENT_6HR_UP	SCHAEFFER_PROSTATE_DEVELOPMENT_6HR_UP		142	-0.22831169	-0.96854466	0.58235294	0.7164969	1	2551	tags=18%, list=14%, signal=21%
REACTOME_MRNA_PROCESSING	REACTOME_MRNA_PROCESSING		152	-0.22872996	-0.96744084	0.54891306	0.71893483	1	5098	tags=41%, list=28%, signal=56%
CREIGHTON_ENDOCRINE_THERAPY_RESISTANCE_4	CREIGHTON_ENDOCRINE_THERAPY_RESISTANCE_4		263	-0.21024773	-0.96712065	0.64285713	0.71909803	1	1757	tags=13%, list=10%, signal=14%
TORCHIA_TARGETS_OF_EWSR1_FLI1_FUSION_DN	TORCHIA_TARGETS_OF_EWSR1_FLI1_FUSION_DN		278	-0.20772319	-0.96569514	0.6195652	0.72239196	1	2232	tags=17%, list=12%, signal=19%
MOREAUX_MULTIPLE_MYELOMA_BY_TACI_DN	MOREAUX_MULTIPLE_MYELOMA_BY_TACI_DN		164	-0.22190434	-0.96543896	0.556213	0.72237355	1	4268	tags=27%, list=24%, signal=35%
REACTOME_DESTABILIZATION_OF_MRNA_BY_KSRP	REACTOME_DESTABILIZATION_OF_MRNA_BY_KSRP		17	-0.3507376	-0.9653678	0.5013928	0.7218456	1	5748	tags=59%, list=32%, signal=86%
GAZDA_DIAMOND_BLACKFAN_ANEMIA_ERYTHROID_DN	GAZDA_DIAMOND_BLACKFAN_ANEMIA_ERYTHROID_DN		427	-0.20193161	-0.9644037	0.68421054	0.7240564	1	3382	tags=23%, list=19%, signal=28%
KEGG_OXIDATIVE_PHOSPHORYLATION	KEGG_OXIDATIVE_PHOSPHORYLATION		107	-0.23821285	-0.964285	0.5424528	0.72364736	1	315	tags=4%, list=2%, signal=4%
ONKEN_UVEAL_MELANOMA_DN	ONKEN_UVEAL_MELANOMA_DN		492	-0.20038874	-0.96264225	0.64912283	0.7277202	1	3157	tags=21%, list=18%, signal=24%
REACTOME_ACTIVATION_OF_THE_MRNA_UPON_BINDING_OF_THE_CAP_BINDING_COMPLEX_AND_EIFS_AND_SUBSEQUENT_BINDING_TO_43S	REACTOME_ACTIVATION_OF_THE_MRNA_UPON_BINDING_OF_THE_CAP_BINDING_COMPLEX_AND_EIFS_AND_SUBSEQUENT_BINDING_TO_43S		55	-0.2716341	-0.961877	0.54195803	0.7293121	1	10843	tags=96%, list=60%, signal=241%
SANSOM_APC_MYC_TARGETS	SANSOM_APC_MYC_TARGETS		197	-0.21695752	-0.96150994	0.62142855	0.72956073	1	3085	tags=20%, list=17%, signal=24%
REACTOME_APC_C_CDH1_MEDIATED_DEGRADATION_OF_CDC20_AND_OTHER_APC_C_CDH1_TARGETED_PROTEINS_IN_LATE_MITOSIS_EARLY_G1	REACTOME_APC_C_CDH1_MEDIATED_DEGRADATION_OF_CDC20_AND_OTHER_APC_C_CDH1_TARGETED_PROTEINS_IN_LATE_MITOSIS_EARLY_G1		63	-0.2672606	-0.96140766	0.525641	0.7291274	1	2156	tags=13%, list=12%, signal=14%
HUANG_GATA2_TARGETS_UP	HUANG_GATA2_TARGETS_UP		118	-0.2379439	-0.961038	0.55050504	0.7294606	1	1006	tags=11%, list=6%, signal=12%
HOSHIDA_LIVER_CANCER_LATE_RECURRENCE_UP	HOSHIDA_LIVER_CANCER_LATE_RECURRENCE_UP		45	-0.27227548	-0.9609115	0.5182724	0.7291064	1	893	tags=11%, list=5%, signal=12%
STEIN_ESRRA_TARGETS_UP	STEIN_ESRRA_TARGETS_UP		352	-0.20491554	-0.9605821	0.67058825	0.72930366	1	1241	tags=9%, list=7%, signal=9%
REACTOME_3_UTR_MEDIATED_TRANSLATIONAL_REGULATION	REACTOME_3_UTR_MEDIATED_TRANSLATIONAL_REGULATION		103	-0.23617135	-0.9603465	0.5701358	0.7292549	1	10843	tags=95%, list=60%, signal=237%
LINSLEY_MIR16_TARGETS	LINSLEY_MIR16_TARGETS		193	-0.2206286	-0.9593126	0.62913907	0.731371	1	3235	tags=24%, list=18%, signal=29%
NIKOLSKY_MUTATED_AND_AMPLIFIED_IN_BREAST_CANCER	NIKOLSKY_MUTATED_AND_AMPLIFIED_IN_BREAST_CANCER		76	-0.24870676	-0.95908344	0.5458167	0.7312048	1	2426	tags=17%, list=13%, signal=20%
BARRIER_CANCER_RELAPSE_NORMAL_SAMPLE_DN	BARRIER_CANCER_RELAPSE_NORMAL_SAMPLE_DN		30	-0.30552822	-0.95711195	0.5345912	0.73617464	1	573	tags=10%, list=3%, signal=10%
BYSTRYKH_HEMATOPOIESIS_STEM_CELL_AND_BRAIN_QTL_CIS	BYSTRYKH_HEMATOPOIESIS_STEM_CELL_AND_BRAIN_QTL_CIS		58	-0.26032636	-0.95598954	0.55925924	0.7387692	1	2062	tags=14%, list=11%, signal=16%
NIKOLSKY_BREAST_CANCER_20Q11_AMPLICON	NIKOLSKY_BREAST_CANCER_20Q11_AMPLICON		27	-0.3087506	-0.9559235	0.5	0.73820394	1	861	tags=15%, list=5%, signal=16%
MARSON_FOXP3_TARGETS_UP	MARSON_FOXP3_TARGETS_UP		58	-0.26275724	-0.95586675	0.53207546	0.7376052	1	2308	tags=24%, list=13%, signal=28%
PID_MTOR_4PATHWAY	PID_MTOR_4PATHWAY		68	-0.25440726	-0.9551912	0.5772059	0.73888403	1	2958	tags=22%, list=16%, signal=26%
KEGG_PARKINSONS_DISEASE	KEGG_PARKINSONS_DISEASE		107	-0.2328753	-0.9550201	0.5531915	0.73863596	1	922	tags=6%, list=5%, signal=6%
BASSO_CD40_SIGNALING_DN	BASSO_CD40_SIGNALING_DN		49	-0.26873934	-0.95423263	0.5103448	0.74013686	1	2812	tags=31%, list=16%, signal=36%
WALLACE_JAK2_TARGETS_UP	WALLACE_JAK2_TARGETS_UP		24	-0.32081628	-0.9532538	0.5147059	0.7423678	1	4199	tags=50%, list=23%, signal=65%
PANGAS_TUMOR_SUPPRESSION_BY_SMAD1_AND_SMAD5_DN	PANGAS_TUMOR_SUPPRESSION_BY_SMAD1_AND_SMAD5_DN		139	-0.23080848	-0.953246	0.5487805	0.7416409	1	3715	tags=27%, list=21%, signal=33%
ZWANG_DOWN_BY_2ND_EGF_PULSE	ZWANG_DOWN_BY_2ND_EGF_PULSE		216	-0.21136272	-0.9529592	0.607362	0.74171627	1	2855	tags=25%, list=16%, signal=29%
WANG_LMO4_TARGETS_UP	WANG_LMO4_TARGETS_UP		333	-0.20397934	-0.95264894	0.6633663	0.741848	1	2520	tags=17%, list=14%, signal=19%
KEGG_GNRH_SIGNALING_PATHWAY	KEGG_GNRH_SIGNALING_PATHWAY		80	-0.24604218	-0.95041764	0.5605381	0.74748075	1	1797	tags=15%, list=10%, signal=17%
REACTOME_SIGNALING_BY_ILS	REACTOME_SIGNALING_BY_ILS		89	-0.24311693	-0.9497072	0.5884774	0.74875057	1	1996	tags=15%, list=11%, signal=16%
TURASHVILI_BREAST_LOBULAR_CARCINOMA_VS_DUCTAL_NORMAL_UP	TURASHVILI_BREAST_LOBULAR_CARCINOMA_VS_DUCTAL_NORMAL_UP		55	-0.26120397	-0.9489451	0.5871886	0.75019276	1	1865	tags=16%, list=10%, signal=18%
SCHUHMACHER_MYC_TARGETS_UP	SCHUHMACHER_MYC_TARGETS_UP		77	-0.24357942	-0.9481572	0.58704454	0.7516428	1	4546	tags=38%, list=25%, signal=50%
HOLLMANN_APOPTOSIS_VIA_CD40_UP	HOLLMANN_APOPTOSIS_VIA_CD40_UP		179	-0.21467878	-0.9477102	0.6458333	0.7521586	1	2975	tags=20%, list=16%, signal=23%
GEISS_RESPONSE_TO_DSRNA_UP	GEISS_RESPONSE_TO_DSRNA_UP		36	-0.28734303	-0.9472374	0.5184049	0.752752	1	1826	tags=17%, list=10%, signal=19%
CROMER_METASTASIS_DN	CROMER_METASTASIS_DN		70	-0.24962589	-0.946718	0.5868726	0.7534715	1	703	tags=9%, list=4%, signal=9%
SHEPARD_BMYB_MORPHOLINO_UP	SHEPARD_BMYB_MORPHOLINO_UP		178	-0.2235159	-0.94577444	0.6477987	0.7552525	1	2815	tags=20%, list=16%, signal=23%
REACTOME_RORA_ACTIVATES_CIRCADIAN_EXPRESSION	REACTOME_RORA_ACTIVATES_CIRCADIAN_EXPRESSION		23	-0.3283973	-0.9437482	0.556231	0.76033604	1	835	tags=17%, list=5%, signal=18%
REACTOME_SHC_RELATED_EVENTS	REACTOME_SHC_RELATED_EVENTS		16	-0.33973232	-0.9429532	0.55873924	0.7619342	1	1527	tags=19%, list=8%, signal=20%
OUILLETTE_CLL_13Q14_DELETION_UP	OUILLETTE_CLL_13Q14_DELETION_UP		67	-0.2496852	-0.94260734	0.6111111	0.76217294	1	3199	tags=24%, list=18%, signal=29%
BASSO_B_LYMPHOCYTE_NETWORK	BASSO_B_LYMPHOCYTE_NETWORK		131	-0.22384562	-0.9420585	0.6179245	0.7629849	1	4215	tags=34%, list=23%, signal=44%
KAAB_HEART_ATRIUM_VS_VENTRICLE_DN	KAAB_HEART_ATRIUM_VS_VENTRICLE_DN		238	-0.20951064	-0.940962	0.64341086	0.76529324	1	3223	tags=23%, list=18%, signal=27%
DIAZ_CHRONIC_MEYLOGENOUS_LEUKEMIA_DN	DIAZ_CHRONIC_MEYLOGENOUS_LEUKEMIA_DN		83	-0.24325001	-0.94063383	0.5893536	0.7654284	1	1894	tags=13%, list=11%, signal=15%
OSWALD_HEMATOPOIETIC_STEM_CELL_IN_COLLAGEN_GEL_DN	OSWALD_HEMATOPOIETIC_STEM_CELL_IN_COLLAGEN_GEL_DN		234	-0.20742887	-0.9401557	0.7234042	0.7659965	1	1726	tags=12%, list=10%, signal=13%
PENG_GLUCOSE_DEPRIVATION_UP	PENG_GLUCOSE_DEPRIVATION_UP		40	-0.27816516	-0.93960005	0.54754096	0.76679033	1	2007	tags=15%, list=11%, signal=17%
DUNNE_TARGETS_OF_AML1_MTG8_FUSION_UP	DUNNE_TARGETS_OF_AML1_MTG8_FUSION_UP		34	-0.2875075	-0.93839455	0.5519481	0.7694935	1	1561	tags=18%, list=9%, signal=19%
REACTOME_TOLL_RECEPTOR_CASCADES	REACTOME_TOLL_RECEPTOR_CASCADES		106	-0.23135799	-0.9380786	0.64319247	0.7695778	1	1481	tags=12%, list=8%, signal=13%
VALK_AML_CLUSTER_12	VALK_AML_CLUSTER_12		22	-0.316633	-0.93713367	0.57941175	0.771645	1	3948	tags=41%, list=22%, signal=52%
PID_IL1_PATHWAY	PID_IL1_PATHWAY		33	-0.28506592	-0.936528	0.57101446	0.77256995	1	415	tags=6%, list=2%, signal=6%
REACTOME_RNA_POL_III_TRANSCRIPTION	REACTOME_RNA_POL_III_TRANSCRIPTION		33	-0.28476223	-0.9361656	0.5630769	0.77282023	1	4757	tags=36%, list=26%, signal=49%
TSENG_IRS1_TARGETS_DN	TSENG_IRS1_TARGETS_DN		118	-0.23347732	-0.9359974	0.6482412	0.7724721	1	2751	tags=20%, list=15%, signal=24%
PARK_TRETINOIN_RESPONSE_AND_RARA_PLZF_FUSION	PARK_TRETINOIN_RESPONSE_AND_RARA_PLZF_FUSION		15	-0.34791234	-0.9329336	0.5443787	0.78015244	1	1220	tags=27%, list=7%, signal=29%
KEGG_AMYOTROPHIC_LATERAL_SCLEROSIS_ALS	KEGG_AMYOTROPHIC_LATERAL_SCLEROSIS_ALS		42	-0.2720127	-0.93288374	0.55921054	0.779525	1	3201	tags=26%, list=18%, signal=32%
SAKAI_CHRONIC_HEPATITIS_VS_LIVER_CANCER_DN	SAKAI_CHRONIC_HEPATITIS_VS_LIVER_CANCER_DN		25	-0.30758283	-0.9322997	0.58917195	0.7803914	1	524	tags=16%, list=3%, signal=16%
VANHARANTA_UTERINE_FIBROID_WITH_7Q_DELETION_UP	VANHARANTA_UTERINE_FIBROID_WITH_7Q_DELETION_UP		65	-0.2509062	-0.9322462	0.5895522	0.77975196	1	3778	tags=28%, list=21%, signal=35%
KOHOUTEK_CCNT2_TARGETS	KOHOUTEK_CCNT2_TARGETS		42	-0.2696689	-0.9313654	0.5589225	0.78137755	1	1346	tags=14%, list=7%, signal=15%
BRUINS_UVC_RESPONSE_EARLY_LATE	BRUINS_UVC_RESPONSE_EARLY_LATE		280	-0.20332636	-0.927958	0.7804878	0.79023415	1	2570	tags=20%, list=14%, signal=23%
REACTOME_MYD88_MAL_CASCADE_INITIATED_ON_PLASMA_MEMBRANE	REACTOME_MYD88_MAL_CASCADE_INITIATED_ON_PLASMA_MEMBRANE		78	-0.24085163	-0.9278355	0.6284585	0.7898187	1	1742	tags=15%, list=10%, signal=17%
LIANG_SILENCED_BY_METHYLATION_UP	LIANG_SILENCED_BY_METHYLATION_UP		22	-0.3085185	-0.9273096	0.5721785	0.79052335	1	1917	tags=27%, list=11%, signal=30%
REACTOME_PYRUVATE_METABOLISM_AND_CITRIC_ACID_TCA_CYCLE	REACTOME_PYRUVATE_METABOLISM_AND_CITRIC_ACID_TCA_CYCLE		39	-0.27354133	-0.92717105	0.57320875	0.7900912	1	2513	tags=13%, list=14%, signal=15%
TAVOR_CEBPA_TARGETS_DN	TAVOR_CEBPA_TARGETS_DN		24	-0.3094217	-0.9253159	0.5525526	0.79448086	1	2464	tags=21%, list=14%, signal=24%
WONG_PROTEASOME_GENE_MODULE	WONG_PROTEASOME_GENE_MODULE		49	-0.25917938	-0.9250552	0.60677963	0.7944912	1	4118	tags=29%, list=23%, signal=37%
BURTON_ADIPOGENESIS_12	BURTON_ADIPOGENESIS_12		32	-0.2910195	-0.92377335	0.54103345	0.79743683	1	3076	tags=25%, list=17%, signal=30%
KEGG_FRUCTOSE_AND_MANNOSE_METABOLISM	KEGG_FRUCTOSE_AND_MANNOSE_METABOLISM		31	-0.2882537	-0.9234322	0.5522388	0.7976096	1	2759	tags=29%, list=15%, signal=34%
KARAKAS_TGFB1_SIGNALING	KARAKAS_TGFB1_SIGNALING		15	-0.34668002	-0.9232431	0.55043226	0.7973695	1	2008	tags=33%, list=11%, signal=37%
MEINHOLD_OVARIAN_CANCER_LOW_GRADE_DN	MEINHOLD_OVARIAN_CANCER_LOW_GRADE_DN		20	-0.32556278	-0.9228008	0.5308642	0.7978404	1	2422	tags=25%, list=13%, signal=29%
PASQUALUCCI_LYMPHOMA_BY_GC_STAGE_DN	PASQUALUCCI_LYMPHOMA_BY_GC_STAGE_DN		139	-0.21843284	-0.9226586	0.66842103	0.7974587	1	2007	tags=17%, list=11%, signal=19%
JUBAN_TARGETS_OF_SPI1_AND_FLI1_UP	JUBAN_TARGETS_OF_SPI1_AND_FLI1_UP		104	-0.22813405	-0.92024475	0.63839287	0.8034272	1	3445	tags=22%, list=19%, signal=27%
DOANE_BREAST_CANCER_CLASSES_UP	DOANE_BREAST_CANCER_CLASSES_UP		49	-0.2583044	-0.9192218	0.6042403	0.8054	1	459	tags=8%, list=3%, signal=8%
STAMBOLSKY_RESPONSE_TO_VITAMIN_D3_UP	STAMBOLSKY_RESPONSE_TO_VITAMIN_D3_UP		62	-0.24998333	-0.9186971	0.625	0.80603045	1	522	tags=6%, list=3%, signal=7%
BIOCARTA_DEATH_PATHWAY	BIOCARTA_DEATH_PATHWAY		31	-0.28175604	-0.9178291	0.570997	0.8075791	1	2220	tags=23%, list=12%, signal=26%
SU_PANCREAS	SU_PANCREAS		28	-0.29059008	-0.917203	0.5477707	0.80854726	1	4064	tags=46%, list=23%, signal=60%
REACTOME_TRANSPORT_OF_MATURE_TRANSCRIPT_TO_CYTOPLASM	REACTOME_TRANSPORT_OF_MATURE_TRANSCRIPT_TO_CYTOPLASM		52	-0.25492674	-0.9169014	0.63448274	0.8085913	1	4341	tags=38%, list=24%, signal=51%
RICKMAN_TUMOR_DIFFERENTIATED_WELL_VS_MODERATELY_UP	RICKMAN_TUMOR_DIFFERENTIATED_WELL_VS_MODERATELY_UP		97	-0.22817364	-0.9160217	0.6737288	0.8102118	1	2478	tags=18%, list=14%, signal=20%
WANG_CLASSIC_ADIPOGENIC_TARGETS_OF_PPARG	WANG_CLASSIC_ADIPOGENIC_TARGETS_OF_PPARG		16	-0.34093	-0.9155764	0.5621469	0.8106334	1	1836	tags=25%, list=10%, signal=28%
FIGUEROA_AML_METHYLATION_CLUSTER_1_DN	FIGUEROA_AML_METHYLATION_CLUSTER_1_DN		32	-0.2833576	-0.9155598	0.6383648	0.8099078	1	1509	tags=16%, list=8%, signal=17%
REACTOME_SULFUR_AMINO_ACID_METABOLISM	REACTOME_SULFUR_AMINO_ACID_METABOLISM		23	-0.31062764	-0.9154789	0.57478005	0.8093416	1	3882	tags=39%, list=22%, signal=50%
REACTOME_APC_C_CDC20_MEDIATED_DEGRADATION_OF_MITOTIC_PROTEINS	REACTOME_APC_C_CDC20_MEDIATED_DEGRADATION_OF_MITOTIC_PROTEINS		64	-0.24553676	-0.91320294	0.6086956	0.8147492	1	2342	tags=14%, list=13%, signal=16%
REACTOME_FORMATION_OF_INCISION_COMPLEX_IN_GG_NER	REACTOME_FORMATION_OF_INCISION_COMPLEX_IN_GG_NER		19	-0.32444733	-0.91241926	0.5877193	0.81608665	1	4064	tags=32%, list=23%, signal=41%
SWEET_KRAS_TARGETS_DN	SWEET_KRAS_TARGETS_DN		49	-0.25875965	-0.9117744	0.63670415	0.8170076	1	1248	tags=14%, list=7%, signal=15%
JISON_SICKLE_CELL_DISEASE_DN	JISON_SICKLE_CELL_DISEASE_DN		161	-0.21142358	-0.91107714	0.7484277	0.8181577	1	3952	tags=27%, list=22%, signal=35%
JAERVINEN_AMPLIFIED_IN_LARYNGEAL_CANCER	JAERVINEN_AMPLIFIED_IN_LARYNGEAL_CANCER		33	-0.2818925	-0.91092503	0.6226415	0.8177691	1	2799	tags=18%, list=16%, signal=21%
BERTUCCI_MEDULLARY_VS_DUCTAL_BREAST_CANCER_UP	BERTUCCI_MEDULLARY_VS_DUCTAL_BREAST_CANCER_UP		176	-0.20697574	-0.91069037	0.75886524	0.8176017	1	3809	tags=27%, list=21%, signal=34%
GRUETZMANN_PANCREATIC_CANCER_UP	GRUETZMANN_PANCREATIC_CANCER_UP		322	-0.19662063	-0.90928876	0.8229167	0.8206091	1	2734	tags=18%, list=15%, signal=21%
NIKOLSKY_BREAST_CANCER_11Q12_Q14_AMPLICON	NIKOLSKY_BREAST_CANCER_11Q12_Q14_AMPLICON		121	-0.22040857	-0.90879047	0.73913044	0.8212261	1	2891	tags=20%, list=16%, signal=23%
REACTOME_TRAF6_MEDIATED_INDUCTION_OF_NFKB_AND_MAP_KINASES_UPON_TLR7_8_OR_9_ACTIVATION	REACTOME_TRAF6_MEDIATED_INDUCTION_OF_NFKB_AND_MAP_KINASES_UPON_TLR7_8_OR_9_ACTIVATION		71	-0.23767205	-0.9086639	0.6417323	0.82079	1	1742	tags=15%, list=10%, signal=17%
SMIRNOV_RESPONSE_TO_IR_2HR_DN	SMIRNOV_RESPONSE_TO_IR_2HR_DN		51	-0.25166535	-0.90842956	0.65397924	0.8206457	1	2276	tags=24%, list=13%, signal=27%
BIOCARTA_MTOR_PATHWAY	BIOCARTA_MTOR_PATHWAY		23	-0.29638016	-0.9078317	0.59940654	0.82150596	1	2154	tags=17%, list=12%, signal=20%
WANG_TARGETS_OF_MLL_CBP_FUSION_UP	WANG_TARGETS_OF_MLL_CBP_FUSION_UP		35	-0.2713704	-0.9075396	0.62025315	0.8215218	1	1073	tags=9%, list=6%, signal=9%
BAKKER_FOXO3_TARGETS_DN	BAKKER_FOXO3_TARGETS_DN		149	-0.21490622	-0.9074427	0.70857143	0.820977	1	3793	tags=26%, list=21%, signal=33%
BIOCARTA_IL1R_PATHWAY	BIOCARTA_IL1R_PATHWAY		29	-0.28905743	-0.9070956	0.6	0.8210839	1	575	tags=10%, list=3%, signal=11%
ZHU_CMV_24_HR_UP	ZHU_CMV_24_HR_UP		90	-0.23062985	-0.9070205	0.70384616	0.82049644	1	1429	tags=10%, list=8%, signal=11%
REACTOME_ION_TRANSPORT_BY_P_TYPE_ATPASES	REACTOME_ION_TRANSPORT_BY_P_TYPE_ATPASES		24	-0.30027267	-0.9065114	0.5875	0.82103056	1	1770	tags=17%, list=10%, signal=18%
BIOCARTA_ARAP_PATHWAY	BIOCARTA_ARAP_PATHWAY		17	-0.33312872	-0.9059128	0.5933735	0.8217865	1	1901	tags=18%, list=11%, signal=20%
JIANG_AGING_CEREBRAL_CORTEX_DN	JIANG_AGING_CEREBRAL_CORTEX_DN		50	-0.25148672	-0.9057512	0.63461536	0.8214439	1	224	tags=4%, list=1%, signal=4%
KEGG_SPHINGOLIPID_METABOLISM	KEGG_SPHINGOLIPID_METABOLISM		35	-0.27572173	-0.9046392	0.61587304	0.82358	1	429	tags=9%, list=2%, signal=9%
BILD_MYC_ONCOGENIC_SIGNATURE	BILD_MYC_ONCOGENIC_SIGNATURE		192	-0.20379922	-0.90440685	0.7762238	0.8233998	1	2313	tags=15%, list=13%, signal=17%
PID_ERA_GENOMIC_PATHWAY	PID_ERA_GENOMIC_PATHWAY		56	-0.2518821	-0.9034379	0.7068404	0.82521707	1	3667	tags=30%, list=20%, signal=38%
REACTOME_TAK1_ACTIVATES_NFKB_BY_PHOSPHORYLATION_AND_ACTIVATION_OF_IKKS_COMPLEX	REACTOME_TAK1_ACTIVATES_NFKB_BY_PHOSPHORYLATION_AND_ACTIVATION_OF_IKKS_COMPLEX		21	-0.31434792	-0.902698	0.57272726	0.8263835	1	2266	tags=24%, list=13%, signal=27%
MARIADASON_REGULATED_BY_HISTONE_ACETYLATION_DN	MARIADASON_REGULATED_BY_HISTONE_ACETYLATION_DN		45	-0.25549084	-0.9007828	0.6102941	0.83050686	1	1194	tags=11%, list=7%, signal=12%
TSENG_IRS1_TARGETS_UP	TSENG_IRS1_TARGETS_UP		95	-0.22523536	-0.89984953	0.6913043	0.8321819	1	3015	tags=22%, list=17%, signal=26%
STANELLE_E2F1_TARGETS	STANELLE_E2F1_TARGETS		27	-0.29001492	-0.8997598	0.64688426	0.8316143	1	3264	tags=37%, list=18%, signal=45%
KAMMINGA_SENESCENCE	KAMMINGA_SENESCENCE		36	-0.2737724	-0.89896613	0.6537217	0.83294296	1	2902	tags=25%, list=16%, signal=30%
MAGRANGEAS_MULTIPLE_MYELOMA_IGLL_VS_IGLK_UP	MAGRANGEAS_MULTIPLE_MYELOMA_IGLL_VS_IGLK_UP		34	-0.28258023	-0.89885765	0.6091954	0.8324497	1	2965	tags=26%, list=16%, signal=32%
ICHIBA_GRAFT_VERSUS_HOST_DISEASE_35D_UP	ICHIBA_GRAFT_VERSUS_HOST_DISEASE_35D_UP		81	-0.23323545	-0.89782894	0.746888	0.8343107	1	2407	tags=20%, list=13%, signal=23%
REACTOME_NEPHRIN_INTERACTIONS	REACTOME_NEPHRIN_INTERACTIONS		19	-0.3207271	-0.8975562	0.6125356	0.8342488	1	1168	tags=11%, list=6%, signal=11%
KEGG_HISTIDINE_METABOLISM	KEGG_HISTIDINE_METABOLISM		21	-0.30121362	-0.89735895	0.6283423	0.8339278	1	37	tags=5%, list=0%, signal=5%
BOYLAN_MULTIPLE_MYELOMA_C_D_UP	BOYLAN_MULTIPLE_MYELOMA_C_D_UP		123	-0.21586917	-0.8970103	0.8	0.83406943	1	3161	tags=26%, list=18%, signal=31%
REACTOME_ORC1_REMOVAL_FROM_CHROMATIN	REACTOME_ORC1_REMOVAL_FROM_CHROMATIN		64	-0.23892114	-0.896849	0.68846154	0.8337343	1	2967	tags=22%, list=16%, signal=26%
BIOCARTA_STRESS_PATHWAY	BIOCARTA_STRESS_PATHWAY		23	-0.30073047	-0.89657235	0.6414566	0.83365756	1	168	tags=9%, list=1%, signal=9%
DACOSTA_UV_RESPONSE_VIA_ERCC3_COMMON_UP	DACOSTA_UV_RESPONSE_VIA_ERCC3_COMMON_UP		72	-0.2350683	-0.8951584	0.6923077	0.8365306	1	1250	tags=11%, list=7%, signal=12%
KAMIKUBO_MYELOID_MN1_NETWORK	KAMIKUBO_MYELOID_MN1_NETWORK		19	-0.31693462	-0.89426804	0.630303	0.83809835	1	1209	tags=11%, list=7%, signal=11%
VANTVEER_BREAST_CANCER_BRCA1_UP	VANTVEER_BREAST_CANCER_BRCA1_UP		30	-0.2860043	-0.89219314	0.659375	0.8425445	1	4460	tags=43%, list=25%, signal=57%
RAO_BOUND_BY_SALL4_ISOFORM_B	RAO_BOUND_BY_SALL4_ISOFORM_B		425	-0.18580715	-0.8913031	0.9259259	0.8439975	1	2467	tags=17%, list=14%, signal=19%
GROSS_HYPOXIA_VIA_HIF1A_UP	GROSS_HYPOXIA_VIA_HIF1A_UP		74	-0.2295336	-0.89086473	0.7291667	0.8443114	1	3929	tags=24%, list=22%, signal=31%
YAO_TEMPORAL_RESPONSE_TO_PROGESTERONE_CLUSTER_9	YAO_TEMPORAL_RESPONSE_TO_PROGESTERONE_CLUSTER_9		58	-0.2424891	-0.8902561	0.6784452	0.8449548	1	3027	tags=26%, list=17%, signal=31%
PID_RETINOIC_ACID_PATHWAY	PID_RETINOIC_ACID_PATHWAY		28	-0.28355202	-0.8895969	0.6702997	0.845739	1	1347	tags=14%, list=7%, signal=15%
CERIBELLI_PROMOTERS_INACTIVE_AND_BOUND_BY_NFY	CERIBELLI_PROMOTERS_INACTIVE_AND_BOUND_BY_NFY		18	-0.32556525	-0.88923204	0.6377246	0.8458875	1	2274	tags=22%, list=13%, signal=25%
LIN_APC_TARGETS	LIN_APC_TARGETS		71	-0.2391507	-0.8891554	0.7186312	0.84528726	1	3573	tags=27%, list=20%, signal=33%
STEIN_ESRRA_TARGETS_DN	STEIN_ESRRA_TARGETS_DN		99	-0.22214223	-0.8890246	0.73417723	0.844823	1	3978	tags=30%, list=22%, signal=39%
REACTOME_PHASE_II_CONJUGATION	REACTOME_PHASE_II_CONJUGATION		38	-0.2655752	-0.8862574	0.6708464	0.8509128	1	4610	tags=39%, list=26%, signal=53%
PURBEY_TARGETS_OF_CTBP1_AND_SATB1_UP	PURBEY_TARGETS_OF_CTBP1_AND_SATB1_UP		74	-0.22987631	-0.885047	0.7764706	0.8531302	1	2852	tags=22%, list=16%, signal=26%
STEIN_ESRRA_TARGETS	STEIN_ESRRA_TARGETS		487	-0.1882938	-0.8837662	0.96666664	0.855497	1	1268	tags=9%, list=7%, signal=9%
REACTOME_ASSOCIATION_OF_TRIC_CCT_WITH_TARGET_PROTEINS_DURING_BIOSYNTHESIS	REACTOME_ASSOCIATION_OF_TRIC_CCT_WITH_TARGET_PROTEINS_DURING_BIOSYNTHESIS		26	-0.28528658	-0.8836367	0.6687307	0.85503215	1	5052	tags=42%, list=28%, signal=59%
BLALOCK_ALZHEIMERS_DISEASE_INCIPIENT_UP	BLALOCK_ALZHEIMERS_DISEASE_INCIPIENT_UP		349	-0.1919048	-0.88313264	0.9529412	0.85540235	1	4195	tags=30%, list=23%, signal=38%
BARRIER_COLON_CANCER_RECURRENCE_UP	BARRIER_COLON_CANCER_RECURRENCE_UP		39	-0.2584917	-0.8823204	0.6708464	0.8565671	1	1514	tags=13%, list=8%, signal=14%
KARLSSON_TGFB1_TARGETS_DN	KARLSSON_TGFB1_TARGETS_DN		194	-0.19913825	-0.87875277	0.884058	0.8647063	1	2936	tags=21%, list=16%, signal=25%
REACTOME_CREB_PHOSPHORYLATION_THROUGH_THE_ACTIVATION_OF_RAS	REACTOME_CREB_PHOSPHORYLATION_THROUGH_THE_ACTIVATION_OF_RAS		24	-0.28653523	-0.8784055	0.65217394	0.8647443	1	1714	tags=17%, list=10%, signal=18%
KIM_MYC_AMPLIFICATION_TARGETS_DN	KIM_MYC_AMPLIFICATION_TARGETS_DN		83	-0.22524373	-0.87805015	0.7905983	0.86483216	1	2424	tags=23%, list=13%, signal=26%
SIG_CHEMOTAXIS	SIG_CHEMOTAXIS		41	-0.25538394	-0.87747526	0.7005988	0.8654423	1	3352	tags=27%, list=19%, signal=33%
ZHAN_MULTIPLE_MYELOMA_HP_DN	ZHAN_MULTIPLE_MYELOMA_HP_DN		39	-0.25882313	-0.8774571	0.69899666	0.86467534	1	2353	tags=23%, list=13%, signal=26%
BROWNE_HCMV_INFECTION_24HR_UP	BROWNE_HCMV_INFECTION_24HR_UP		130	-0.21038815	-0.87564194	0.8306011	0.8681676	1	2055	tags=16%, list=11%, signal=18%
REACTOME_FORMATION_OF_THE_TERNARY_COMPLEX_AND_SUBSEQUENTLY_THE_43S_COMPLEX	REACTOME_FORMATION_OF_THE_TERNARY_COMPLEX_AND_SUBSEQUENTLY_THE_43S_COMPLEX		47	-0.2470442	-0.8750111	0.73103446	0.8688889	1	10843	tags=96%, list=60%, signal=239%
MULLIGHAN_MLL_SIGNATURE_1_UP	MULLIGHAN_MLL_SIGNATURE_1_UP		315	-0.18786293	-0.872906	0.9318182	0.87308204	1	3157	tags=20%, list=18%, signal=24%
CHUNG_BLISTER_CYTOTOXICITY_DN	CHUNG_BLISTER_CYTOTOXICITY_DN		34	-0.2619687	-0.87274885	0.7183544	0.8726412	1	1939	tags=18%, list=11%, signal=20%
HOFFMANN_PRE_BI_TO_LARGE_PRE_BII_LYMPHOCYTE_DN	HOFFMANN_PRE_BI_TO_LARGE_PRE_BII_LYMPHOCYTE_DN		61	-0.23695578	-0.8721678	0.70526314	0.87323076	1	1891	tags=15%, list=10%, signal=16%
NIELSEN_LEIOMYOSARCOMA_CNN1_DN	NIELSEN_LEIOMYOSARCOMA_CNN1_DN		18	-0.3096501	-0.8719182	0.6246649	0.8730168	1	455	tags=11%, list=3%, signal=11%
REACTOME_PEPTIDE_CHAIN_ELONGATION	REACTOME_PEPTIDE_CHAIN_ELONGATION		83	-0.22473377	-0.8717655	0.77459013	0.87259716	1	10333	tags=94%, list=57%, signal=219%
PID_HIF1A_PATHWAY	PID_HIF1A_PATHWAY		19	-0.30806437	-0.87167984	0.6236559	0.8720061	1	217	tags=5%, list=1%, signal=5%
REACTOME_DOWNREGULATION_OF_SMAD2_3_SMAD4_TRANSCRIPTIONAL_ACTIVITY	REACTOME_DOWNREGULATION_OF_SMAD2_3_SMAD4_TRANSCRIPTIONAL_ACTIVITY		19	-0.30263725	-0.8716284	0.65608466	0.8713295	1	2121	tags=16%, list=12%, signal=18%
MCCABE_HOXC6_TARGETS_CANCER_UP	MCCABE_HOXC6_TARGETS_CANCER_UP		24	-0.29029205	-0.87145007	0.6490683	0.87096006	1	665	tags=13%, list=4%, signal=13%
MULLIGHAN_MLL_SIGNATURE_2_UP	MULLIGHAN_MLL_SIGNATURE_2_UP		348	-0.18937822	-0.8712992	0.9174312	0.8705274	1	2233	tags=15%, list=12%, signal=16%
HU_ANGIOGENESIS_DN	HU_ANGIOGENESIS_DN		34	-0.2684314	-0.8707371	0.67801857	0.87097	1	4887	tags=47%, list=27%, signal=64%
REACTOME_TRANSPORT_OF_RIBONUCLEOPROTEINS_INTO_THE_HOST_NUCLEUS	REACTOME_TRANSPORT_OF_RIBONUCLEOPROTEINS_INTO_THE_HOST_NUCLEUS		27	-0.28000578	-0.8706821	0.6733524	0.87033486	1	5048	tags=56%, list=28%, signal=77%
BROWNE_HCMV_INFECTION_18HR_UP	BROWNE_HCMV_INFECTION_18HR_UP		165	-0.20081018	-0.87067133	0.91071427	0.8695714	1	2557	tags=18%, list=14%, signal=20%
DACOSTA_UV_RESPONSE_VIA_ERCC3_XPCS_UP	DACOSTA_UV_RESPONSE_VIA_ERCC3_XPCS_UP		27	-0.27948898	-0.8706227	0.6816817	0.8688856	1	2642	tags=26%, list=15%, signal=30%
KEGG_PORPHYRIN_AND_CHLOROPHYLL_METABOLISM	KEGG_PORPHYRIN_AND_CHLOROPHYLL_METABOLISM		21	-0.29707786	-0.8705858	0.63461536	0.86818075	1	2797	tags=24%, list=16%, signal=28%
BANDRES_RESPONSE_TO_CARMUSTIN_WITHOUT_MGMT_48HR_DN	BANDRES_RESPONSE_TO_CARMUSTIN_WITHOUT_MGMT_48HR_DN		28	-0.27808613	-0.8688578	0.682243	0.87140816	1	2352	tags=21%, list=13%, signal=25%
NUNODA_RESPONSE_TO_DASATINIB_IMATINIB_UP	NUNODA_RESPONSE_TO_DASATINIB_IMATINIB_UP		28	-0.27185753	-0.8684474	0.6911315	0.87159747	1	1988	tags=25%, list=11%, signal=28%
REACTOME_RNA_POL_I_TRANSCRIPTION_INITIATION	REACTOME_RNA_POL_I_TRANSCRIPTION_INITIATION		23	-0.29088488	-0.866851	0.67701864	0.87464654	1	12798	tags=100%, list=71%, signal=344%
VARELA_ZMPSTE24_TARGETS_DN	VARELA_ZMPSTE24_TARGETS_DN		25	-0.28113267	-0.8658256	0.6852941	0.87618726	1	2281	tags=20%, list=13%, signal=23%
HUMMEL_BURKITTS_LYMPHOMA_UP	HUMMEL_BURKITTS_LYMPHOMA_UP		37	-0.2613996	-0.86546624	0.7027864	0.8762372	1	1924	tags=22%, list=11%, signal=24%
REACTOME_SEMA4D_INDUCED_CELL_MIGRATION_AND_GROWTH_CONE_COLLAPSE	REACTOME_SEMA4D_INDUCED_CELL_MIGRATION_AND_GROWTH_CONE_COLLAPSE		22	-0.29346576	-0.8636764	0.65970147	0.87963456	1	1954	tags=18%, list=11%, signal=20%
CAFFAREL_RESPONSE_TO_THC_24HR_5_DN	CAFFAREL_RESPONSE_TO_THC_24HR_5_DN		55	-0.23795415	-0.86215425	0.7443609	0.8821736	1	2260	tags=18%, list=13%, signal=21%
YOKOE_CANCER_TESTIS_ANTIGENS	YOKOE_CANCER_TESTIS_ANTIGENS		28	-0.27318987	-0.86105335	0.70212764	0.8838297	1	3986	tags=46%, list=22%, signal=60%
JACKSON_DNMT1_TARGETS_DN	JACKSON_DNMT1_TARGETS_DN		24	-0.2913047	-0.85889876	0.699187	0.8880171	1	2391	tags=33%, list=13%, signal=38%
HASLINGER_B_CLL_WITH_17P13_DELETION	HASLINGER_B_CLL_WITH_17P13_DELETION		20	-0.3008864	-0.8582577	0.65527064	0.888663	1	3226	tags=40%, list=18%, signal=49%
MOLENAAR_TARGETS_OF_CCND1_AND_CDK4_UP	MOLENAAR_TARGETS_OF_CCND1_AND_CDK4_UP		63	-0.22476989	-0.8580945	0.80737704	0.8882057	1	3097	tags=25%, list=17%, signal=31%
IWANAGA_CARCINOGENESIS_BY_KRAS_DN	IWANAGA_CARCINOGENESIS_BY_KRAS_DN		101	-0.21164967	-0.8575505	0.86384976	0.8886106	1	3370	tags=25%, list=19%, signal=30%
KEGG_ALANINE_ASPARTATE_AND_GLUTAMATE_METABOLISM	KEGG_ALANINE_ASPARTATE_AND_GLUTAMATE_METABOLISM		27	-0.27458745	-0.85675865	0.6873065	0.8896313	1	1419	tags=15%, list=8%, signal=16%
WATANABE_COLON_CANCER_MSI_VS_MSS_UP	WATANABE_COLON_CANCER_MSI_VS_MSS_UP		20	-0.304101	-0.8558101	0.6741214	0.8909661	1	1289	tags=20%, list=7%, signal=22%
REACTOME_DEADENYLATION_OF_MRNA	REACTOME_DEADENYLATION_OF_MRNA		18	-0.3121117	-0.8557383	0.6518106	0.89033747	1	3997	tags=28%, list=22%, signal=36%
PID_WNT_CANONICAL_PATHWAY	PID_WNT_CANONICAL_PATHWAY		18	-0.3043754	-0.8545002	0.6829971	0.8922043	1	176	tags=6%, list=1%, signal=6%
ZHAN_EARLY_DIFFERENTIATION_GENES_DN	ZHAN_EARLY_DIFFERENTIATION_GENES_DN		32	-0.25891393	-0.8540392	0.76175547	0.8923863	1	2831	tags=31%, list=16%, signal=37%
REACTOME_ACTIVATION_OF_BH3_ONLY_PROTEINS	REACTOME_ACTIVATION_OF_BH3_ONLY_PROTEINS		16	-0.3189071	-0.85302097	0.67777777	0.8937025	1	2947	tags=31%, list=16%, signal=37%
FLOTHO_PEDIATRIC_ALL_THERAPY_RESPONSE_UP	FLOTHO_PEDIATRIC_ALL_THERAPY_RESPONSE_UP		48	-0.24077202	-0.8523981	0.78909093	0.89429826	1	5838	tags=40%, list=32%, signal=58%
FIGUEROA_AML_METHYLATION_CLUSTER_6_UP	FIGUEROA_AML_METHYLATION_CLUSTER_6_UP		119	-0.2083886	-0.8497671	0.88	0.89906	1	1960	tags=13%, list=11%, signal=15%
KEGG_PANCREATIC_CANCER	KEGG_PANCREATIC_CANCER		67	-0.22861058	-0.8497665	0.7878788	0.89826214	1	3050	tags=22%, list=17%, signal=27%
SHEN_SMARCA2_TARGETS_UP	SHEN_SMARCA2_TARGETS_UP		417	-0.17658298	-0.8494205	0.98571426	0.89818454	1	4836	tags=31%, list=27%, signal=41%
SCHLOSSER_SERUM_RESPONSE_UP	SCHLOSSER_SERUM_RESPONSE_UP		110	-0.20795825	-0.84738207	0.85863876	0.9016054	1	2145	tags=14%, list=12%, signal=15%
REACTOME_PRE_NOTCH_TRANSCRIPTION_AND_TRANSLATION	REACTOME_PRE_NOTCH_TRANSCRIPTION_AND_TRANSLATION		23	-0.28133774	-0.8466796	0.7542857	0.90228516	1	2642	tags=22%, list=15%, signal=25%
MULLIGHAN_MLL_SIGNATURE_2_DN	MULLIGHAN_MLL_SIGNATURE_2_DN		240	-0.18860307	-0.8451672	0.95522386	0.9045645	1	3036	tags=20%, list=17%, signal=23%
BERNARD_PPAPDC1B_TARGETS_UP	BERNARD_PPAPDC1B_TARGETS_UP		35	-0.25309634	-0.844438	0.73754156	0.905181	1	3130	tags=26%, list=17%, signal=31%
MATZUK_EMBRYONIC_GERM_CELL	MATZUK_EMBRYONIC_GERM_CELL		16	-0.3123759	-0.8441693	0.6811989	0.90493584	1	2009	tags=25%, list=11%, signal=28%
GUO_TARGETS_OF_IRS1_AND_IRS2	GUO_TARGETS_OF_IRS1_AND_IRS2		86	-0.2143338	-0.8438089	0.8264463	0.90485936	1	2798	tags=20%, list=16%, signal=23%
SIG_PIP3_SIGNALING_IN_B_LYMPHOCYTES	SIG_PIP3_SIGNALING_IN_B_LYMPHOCYTES		29	-0.2658755	-0.8433696	0.72590363	0.9049984	1	3863	tags=38%, list=21%, signal=48%
REACTOME_SIGNALING_BY_ROBO_RECEPTOR	REACTOME_SIGNALING_BY_ROBO_RECEPTOR		29	-0.26923987	-0.8425906	0.73015875	0.9058271	1	3196	tags=24%, list=18%, signal=29%
PID_NETRIN_PATHWAY	PID_NETRIN_PATHWAY		30	-0.2702291	-0.8417646	0.73734176	0.90674543	1	1854	tags=17%, list=10%, signal=19%
PARK_HSC_VS_MULTIPOTENT_PROGENITORS_UP	PARK_HSC_VS_MULTIPOTENT_PROGENITORS_UP		17	-0.30517074	-0.841424	0.7104558	0.9066261	1	2284	tags=24%, list=13%, signal=27%
REACTOME_PLC_BETA_MEDIATED_EVENTS	REACTOME_PLC_BETA_MEDIATED_EVENTS		35	-0.26195723	-0.8388613	0.70552146	0.91113746	1	3979	tags=34%, list=22%, signal=44%
PARK_HSC_MARKERS	PARK_HSC_MARKERS		41	-0.24722059	-0.8382272	0.73650795	0.911634	1	1314	tags=12%, list=7%, signal=13%
WATANABE_RECTAL_CANCER_RADIOTHERAPY_RESPONSIVE_UP	WATANABE_RECTAL_CANCER_RADIOTHERAPY_RESPONSIVE_UP		96	-0.20588677	-0.83736014	0.875576	0.9125432	1	1957	tags=11%, list=11%, signal=13%
BOYAULT_LIVER_CANCER_SUBCLASS_G6_UP	BOYAULT_LIVER_CANCER_SUBCLASS_G6_UP		58	-0.22835554	-0.83718824	0.8333333	0.91208416	1	1404	tags=16%, list=8%, signal=17%
BAE_BRCA1_TARGETS_DN	BAE_BRCA1_TARGETS_DN		29	-0.26761568	-0.83706737	0.7173252	0.91150403	1	2793	tags=24%, list=15%, signal=29%
REACTOME_CDT1_ASSOCIATION_WITH_THE_CDC6_ORC_ORIGIN_COMPLEX	REACTOME_CDT1_ASSOCIATION_WITH_THE_CDC6_ORC_ORIGIN_COMPLEX		53	-0.23285541	-0.83598185	0.79562044	0.91282964	1	4679	tags=26%, list=26%, signal=36%
PID_SMAD2_3PATHWAY	PID_SMAD2_3PATHWAY		17	-0.3010063	-0.83529544	0.7202381	0.9133146	1	2970	tags=18%, list=16%, signal=21%
KEGG_RIBOSOME	KEGG_RIBOSOME		85	-0.2105959	-0.83471394	0.87966806	0.9136374	1	10333	tags=93%, list=57%, signal=217%
FIGUEROA_AML_METHYLATION_CLUSTER_3_DN	FIGUEROA_AML_METHYLATION_CLUSTER_3_DN		30	-0.2684728	-0.83463293	0.7181009	0.9129994	1	1509	tags=13%, list=8%, signal=15%
REACTOME_MRNA_SPLICING_MINOR_PATHWAY	REACTOME_MRNA_SPLICING_MINOR_PATHWAY		42	-0.25025976	-0.8344476	0.78368795	0.91258985	1	4377	tags=36%, list=24%, signal=47%
AGUIRRE_PANCREATIC_CANCER_COPY_NUMBER_UP	AGUIRRE_PANCREATIC_CANCER_COPY_NUMBER_UP		279	-0.18269747	-0.8336775	0.98	0.9132817	1	2656	tags=15%, list=15%, signal=18%
MORI_IMMATURE_B_LYMPHOCYTE_UP	MORI_IMMATURE_B_LYMPHOCYTE_UP		44	-0.23430151	-0.83366436	0.7804878	0.91251457	1	3088	tags=20%, list=17%, signal=25%
IVANOVA_HEMATOPOIESIS_INTERMEDIATE_PROGENITOR	IVANOVA_HEMATOPOIESIS_INTERMEDIATE_PROGENITOR		130	-0.1971281	-0.8299108	0.93442625	0.9189463	1	2466	tags=15%, list=14%, signal=18%
KIM_GASTRIC_CANCER_CHEMOSENSITIVITY	KIM_GASTRIC_CANCER_CHEMOSENSITIVITY		79	-0.21482202	-0.82975966	0.86864406	0.91845095	1	2897	tags=20%, list=16%, signal=24%
KEGG_BETA_ALANINE_METABOLISM	KEGG_BETA_ALANINE_METABOLISM		20	-0.28779966	-0.8291341	0.74787533	0.91887635	1	4174	tags=45%, list=23%, signal=58%
BILANGES_SERUM_SENSITIVE_VIA_TSC2	BILANGES_SERUM_SENSITIVE_VIA_TSC2		37	-0.24782862	-0.82888395	0.7394137	0.9185285	1	2154	tags=22%, list=12%, signal=25%
REACTOME_LATE_PHASE_OF_HIV_LIFE_CYCLE	REACTOME_LATE_PHASE_OF_HIV_LIFE_CYCLE		96	-0.20775063	-0.8285133	0.9036697	0.91843635	1	4155	tags=29%, list=23%, signal=38%
KEGG_THYROID_CANCER	KEGG_THYROID_CANCER		26	-0.2703239	-0.82845056	0.7225807	0.91777074	1	2642	tags=23%, list=15%, signal=27%
REACTOME_RNA_POL_III_CHAIN_ELONGATION	REACTOME_RNA_POL_III_CHAIN_ELONGATION		17	-0.30136034	-0.827026	0.7050562	0.9196363	1	4558	tags=41%, list=25%, signal=55%
REACTOME_CLEAVAGE_OF_GROWING_TRANSCRIPT_IN_THE_TERMINATION_REGION_	REACTOME_CLEAVAGE_OF_GROWING_TRANSCRIPT_IN_THE_TERMINATION_REGION_		42	-0.24165927	-0.8249366	0.80144405	0.9227346	1	4432	tags=36%, list=25%, signal=47%
SATO_SILENCED_EPIGENETICALLY_IN_PANCREATIC_CANCER	SATO_SILENCED_EPIGENETICALLY_IN_PANCREATIC_CANCER		31	-0.2613316	-0.8242875	0.75872093	0.9232154	1	3230	tags=29%, list=18%, signal=35%
KEGG_LONG_TERM_DEPRESSION	KEGG_LONG_TERM_DEPRESSION		52	-0.23226942	-0.82265824	0.80968857	0.92540836	1	3060	tags=23%, list=17%, signal=28%
HOSHIDA_LIVER_CANCER_SURVIVAL_DN	HOSHIDA_LIVER_CANCER_SURVIVAL_DN		87	-0.20948336	-0.82145363	0.88018435	0.92680454	1	1150	tags=8%, list=6%, signal=9%
GALLUZZI_PERMEABILIZE_MITOCHONDRIA	GALLUZZI_PERMEABILIZE_MITOCHONDRIA		39	-0.24224453	-0.8205804	0.7913907	0.92750305	1	2947	tags=26%, list=16%, signal=31%
GYORFFY_DOXORUBICIN_RESISTANCE	GYORFFY_DOXORUBICIN_RESISTANCE		41	-0.24109505	-0.820058	0.7799353	0.927677	1	2106	tags=17%, list=12%, signal=19%
REACTOME_SHC1_EVENTS_IN_EGFR_SIGNALING	REACTOME_SHC1_EVENTS_IN_EGFR_SIGNALING		15	-0.3005823	-0.8187556	0.7197802	0.9293242	1	1527	tags=13%, list=8%, signal=15%
REACTOME_TRIGLYCERIDE_BIOSYNTHESIS	REACTOME_TRIGLYCERIDE_BIOSYNTHESIS		35	-0.24837062	-0.8168617	0.79635257	0.93185776	1	2275	tags=17%, list=13%, signal=20%
KYNG_RESPONSE_TO_H2O2_VIA_ERCC6_DN	KYNG_RESPONSE_TO_H2O2_VIA_ERCC6_DN		42	-0.23606387	-0.8161621	0.8293651	0.93231815	1	4111	tags=29%, list=23%, signal=37%
MULLIGHAN_NPM1_MUTATED_SIGNATURE_1_UP	MULLIGHAN_NPM1_MUTATED_SIGNATURE_1_UP		215	-0.18759316	-0.8159937	0.9659864	0.9317995	1	2541	tags=16%, list=14%, signal=19%
SPIRA_SMOKERS_LUNG_CANCER_DN	SPIRA_SMOKERS_LUNG_CANCER_DN		18	-0.29824075	-0.8158974	0.7	0.9311646	1	12664	tags=100%, list=70%, signal=335%
KORKOLA_SEMINOMA_UP	KORKOLA_SEMINOMA_UP		38	-0.2456244	-0.8148548	0.80655736	0.93227994	1	1902	tags=16%, list=11%, signal=18%
LIANG_HEMATOPOIESIS_STEM_CELL_NUMBER_LARGE_VS_TINY_DN	LIANG_HEMATOPOIESIS_STEM_CELL_NUMBER_LARGE_VS_TINY_DN		39	-0.23710193	-0.8128116	0.797546	0.9350064	1	561	tags=8%, list=3%, signal=8%
KEGG_RNA_DEGRADATION	KEGG_RNA_DEGRADATION		56	-0.2234077	-0.8116895	0.85171103	0.9362115	1	5639	tags=45%, list=31%, signal=65%
REACTOME_INTERACTIONS_OF_VPR_WITH_HOST_CELLULAR_PROTEINS	REACTOME_INTERACTIONS_OF_VPR_WITH_HOST_CELLULAR_PROTEINS		32	-0.25560215	-0.80854535	0.78846157	0.94086474	1	4155	tags=44%, list=23%, signal=57%
MCCLUNG_CREB1_TARGETS_DN	MCCLUNG_CREB1_TARGETS_DN		46	-0.22742626	-0.80810213	0.82679737	0.9408099	1	2371	tags=15%, list=13%, signal=17%
ENK_UV_RESPONSE_KERATINOCYTE_DN	ENK_UV_RESPONSE_KERATINOCYTE_DN		474	-0.17155711	-0.8080462	1	0.940115	1	4290	tags=28%, list=24%, signal=36%
KEGG_FC_GAMMA_R_MEDIATED_PHAGOCYTOSIS	KEGG_FC_GAMMA_R_MEDIATED_PHAGOCYTOSIS		77	-0.20855388	-0.80688167	0.88429755	0.94134307	1	1347	tags=9%, list=7%, signal=10%
KEGG_NON_SMALL_CELL_LUNG_CANCER	KEGG_NON_SMALL_CELL_LUNG_CANCER		49	-0.22605303	-0.8055793	0.83773583	0.94272286	1	2947	tags=20%, list=16%, signal=24%
REACTOME_PHOSPHOLIPASE_C_MEDIATED_CASCADE	REACTOME_PHOSPHOLIPASE_C_MEDIATED_CASCADE		37	-0.24547458	-0.80415547	0.8190789	0.94430375	1	1166	tags=11%, list=6%, signal=12%
PODAR_RESPONSE_TO_ADAPHOSTIN_DN	PODAR_RESPONSE_TO_ADAPHOSTIN_DN		17	-0.29077333	-0.80400044	0.75396824	0.94372314	1	3929	tags=41%, list=22%, signal=53%
REACTOME_ANTIGEN_PROCESSING_UBIQUITINATION_PROTEASOME_DEGRADATION	REACTOME_ANTIGEN_PROCESSING_UBIQUITINATION_PROTEASOME_DEGRADATION		187	-0.18434148	-0.80307627	0.9704142	0.9444107	1	2633	tags=13%, list=15%, signal=15%
KIM_GERMINAL_CENTER_T_HELPER_UP	KIM_GERMINAL_CENTER_T_HELPER_UP		55	-0.22329588	-0.80117923	0.85	0.94681734	1	4196	tags=38%, list=23%, signal=50%
PID_HDAC_CLASSII_PATHWAY	PID_HDAC_CLASSII_PATHWAY		32	-0.24988373	-0.80023474	0.78635013	0.9474953	1	2515	tags=19%, list=14%, signal=22%
REACTOME_GRB2_EVENTS_IN_ERBB2_SIGNALING	REACTOME_GRB2_EVENTS_IN_ERBB2_SIGNALING		20	-0.27795917	-0.7993774	0.7614679	0.94802874	1	1527	tags=15%, list=8%, signal=16%
PID_P75_NTR_PATHWAY	PID_P75_NTR_PATHWAY		61	-0.21771263	-0.79904395	0.850365	0.9477816	1	2642	tags=18%, list=15%, signal=21%
KEGG_RNA_POLYMERASE	KEGG_RNA_POLYMERASE		29	-0.2496021	-0.7985565	0.8075802	0.9477468	1	623	tags=7%, list=3%, signal=7%
LU_TUMOR_VASCULATURE_UP	LU_TUMOR_VASCULATURE_UP		21	-0.2788122	-0.7982376	0.7507163	0.9474244	1	49	tags=5%, list=0%, signal=5%
KEGG_ALZHEIMERS_DISEASE	KEGG_ALZHEIMERS_DISEASE		138	-0.18923636	-0.7979111	0.97536945	0.947187	1	1546	tags=7%, list=9%, signal=8%
BONCI_TARGETS_OF_MIR15A_AND_MIR16_1	BONCI_TARGETS_OF_MIR15A_AND_MIR16_1		83	-0.20690778	-0.79416263	0.9087452	0.9523084	1	1661	tags=11%, list=9%, signal=12%
NIKOLSKY_OVERCONNECTED_IN_BREAST_CANCER	NIKOLSKY_OVERCONNECTED_IN_BREAST_CANCER		15	-0.2952365	-0.79285973	0.73888886	0.9534071	1	3331	tags=27%, list=18%, signal=33%
REACTOME_MRNA_3_END_PROCESSING	REACTOME_MRNA_3_END_PROCESSING		33	-0.24223359	-0.7879785	0.83809525	0.95993894	1	4432	tags=33%, list=25%, signal=44%
RAMALHO_STEMNESS_DN	RAMALHO_STEMNESS_DN		56	-0.21746328	-0.7851394	0.8867925	0.96344763	1	2407	tags=20%, list=13%, signal=23%
KEGG_INSULIN_SIGNALING_PATHWAY	KEGG_INSULIN_SIGNALING_PATHWAY		119	-0.19267987	-0.78497666	0.94711536	0.9628697	1	1527	tags=12%, list=8%, signal=13%
MARTORIATI_MDM4_TARGETS_FETAL_LIVER_DN	MARTORIATI_MDM4_TARGETS_FETAL_LIVER_DN		465	-0.16313541	-0.7833422	1	0.9644514	1	3228	tags=17%, list=18%, signal=21%
DIRMEIER_LMP1_RESPONSE_LATE_DN	DIRMEIER_LMP1_RESPONSE_LATE_DN		28	-0.24892442	-0.7832854	0.790625	0.9637299	1	49	tags=4%, list=0%, signal=4%
KEGG_FATTY_ACID_METABOLISM	KEGG_FATTY_ACID_METABOLISM		33	-0.24003473	-0.7805328	0.8287462	0.966906	1	3917	tags=33%, list=22%, signal=43%
REACTOME_HIV_LIFE_CYCLE	REACTOME_HIV_LIFE_CYCLE		108	-0.18995503	-0.7804129	0.9318182	0.9662434	1	4155	tags=30%, list=23%, signal=38%
DARWICHE_SKIN_TUMOR_PROMOTER_DN	DARWICHE_SKIN_TUMOR_PROMOTER_DN		141	-0.1851661	-0.7796801	0.9528796	0.9664902	1	349	tags=5%, list=2%, signal=5%
CAFFAREL_RESPONSE_TO_THC_24HR_5_UP	CAFFAREL_RESPONSE_TO_THC_24HR_5_UP		30	-0.24285336	-0.7795597	0.8449848	0.9658534	1	3190	tags=27%, list=18%, signal=32%
REACTOME_YAP1_AND_WWTR1_TAZ_STIMULATED_GENE_EXPRESSION	REACTOME_YAP1_AND_WWTR1_TAZ_STIMULATED_GENE_EXPRESSION		22	-0.26520377	-0.77948695	0.7894737	0.965157	1	767	tags=14%, list=4%, signal=14%
KEGG_EPITHELIAL_CELL_SIGNALING_IN_HELICOBACTER_PYLORI_INFECTION	KEGG_EPITHELIAL_CELL_SIGNALING_IN_HELICOBACTER_PYLORI_INFECTION		62	-0.21053977	-0.7790856	0.89312977	0.96488744	1	1517	tags=11%, list=8%, signal=12%
REACTOME_TRANSPORT_OF_VITAMINS_NUCLEOSIDES_AND_RELATED_MOLECULES	REACTOME_TRANSPORT_OF_VITAMINS_NUCLEOSIDES_AND_RELATED_MOLECULES		22	-0.26766866	-0.77718276	0.7939394	0.96678597	1	71	tags=5%, list=0%, signal=5%
GALE_APL_WITH_FLT3_MUTATED_UP	GALE_APL_WITH_FLT3_MUTATED_UP		54	-0.21466371	-0.77492386	0.8880597	0.9689915	1	3716	tags=22%, list=21%, signal=28%
SANSOM_APC_TARGETS_REQUIRE_MYC	SANSOM_APC_TARGETS_REQUIRE_MYC		189	-0.1777342	-0.7729669	0.9768786	0.9709202	1	3085	tags=22%, list=17%, signal=27%
RAMALHO_STEMNESS_UP	RAMALHO_STEMNESS_UP		200	-0.17832515	-0.7721661	1	0.97125816	1	3945	tags=23%, list=22%, signal=29%
LI_PROSTATE_CANCER_EPIGENETIC	LI_PROSTATE_CANCER_EPIGENETIC		22	-0.2581906	-0.7704162	0.8179348	0.9727244	1	941	tags=14%, list=5%, signal=14%
MATZUK_MEIOTIC_AND_DNA_REPAIR	MATZUK_MEIOTIC_AND_DNA_REPAIR		33	-0.23933238	-0.76980263	0.8630573	0.97271585	1	3190	tags=27%, list=18%, signal=33%
KEGG_HUNTINGTONS_DISEASE	KEGG_HUNTINGTONS_DISEASE		161	-0.17919877	-0.76969457	1	0.9720502	1	3192	tags=16%, list=18%, signal=19%
KEGG_VALINE_LEUCINE_AND_ISOLEUCINE_DEGRADATION	KEGG_VALINE_LEUCINE_AND_ISOLEUCINE_DEGRADATION		43	-0.22002213	-0.7676224	0.9134948	0.9739887	1	4225	tags=37%, list=23%, signal=48%
REACTOME_INTRINSIC_PATHWAY_FOR_APOPTOSIS	REACTOME_INTRINSIC_PATHWAY_FOR_APOPTOSIS		28	-0.23512933	-0.76664114	0.8237288	0.97444284	1	2947	tags=29%, list=16%, signal=34%
ABBUD_LIF_SIGNALING_1_DN	ABBUD_LIF_SIGNALING_1_DN		22	-0.26215518	-0.7659396	0.82080925	0.97455984	1	36	tags=5%, list=0%, signal=5%
BOGNI_TREATMENT_RELATED_MYELOID_LEUKEMIA_DN	BOGNI_TREATMENT_RELATED_MYELOID_LEUKEMIA_DN		28	-0.24702741	-0.7651054	0.83136094	0.9748308	1	2247	tags=18%, list=12%, signal=20%
SEIDEN_ONCOGENESIS_BY_MET	SEIDEN_ONCOGENESIS_BY_MET		84	-0.19513482	-0.76480454	0.93886465	0.9744288	1	3575	tags=21%, list=20%, signal=27%
NIELSEN_GIST_VS_SYNOVIAL_SARCOMA_UP	NIELSEN_GIST_VS_SYNOVIAL_SARCOMA_UP		17	-0.2745136	-0.76354074	0.7942857	0.97527236	1	1865	tags=18%, list=10%, signal=20%
MATZUK_MALE_REPRODUCTION_SERTOLI	MATZUK_MALE_REPRODUCTION_SERTOLI		20	-0.25839928	-0.7631041	0.8103448	0.97496957	1	2118	tags=25%, list=12%, signal=28%
YORDY_RECIPROCAL_REGULATION_BY_ETS1_AND_SP100_UP	YORDY_RECIPROCAL_REGULATION_BY_ETS1_AND_SP100_UP		19	-0.2787022	-0.76261854	0.7965616	0.9747767	1	1638	tags=21%, list=9%, signal=23%
BEIER_GLIOMA_STEM_CELL_DN	BEIER_GLIOMA_STEM_CELL_DN		60	-0.20475788	-0.7587304	0.93869734	0.9786893	1	3459	tags=25%, list=19%, signal=31%
SAKAI_CHRONIC_HEPATITIS_VS_LIVER_CANCER_UP	SAKAI_CHRONIC_HEPATITIS_VS_LIVER_CANCER_UP		74	-0.19718699	-0.7579408	0.93650794	0.97885853	1	3792	tags=27%, list=21%, signal=34%
PID_CDC42_PATHWAY	PID_CDC42_PATHWAY		66	-0.20183153	-0.7569793	0.92720306	0.9791949	1	1347	tags=8%, list=7%, signal=8%
ROSS_ACUTE_MYELOID_LEUKEMIA_CBF	ROSS_ACUTE_MYELOID_LEUKEMIA_CBF		73	-0.19997275	-0.75519055	0.95652175	0.98056704	1	3870	tags=32%, list=21%, signal=40%
APPIERTO_RESPONSE_TO_FENRETINIDE_DN	APPIERTO_RESPONSE_TO_FENRETINIDE_DN		47	-0.21619077	-0.75460243	0.8981818	0.98043364	1	1426	tags=9%, list=8%, signal=9%
ROSS_LEUKEMIA_WITH_MLL_FUSIONS	ROSS_LEUKEMIA_WITH_MLL_FUSIONS		60	-0.20088027	-0.7541894	0.9418182	0.9800857	1	1048	tags=8%, list=6%, signal=9%
JOHNSTONE_PARVB_TARGETS_2_DN	JOHNSTONE_PARVB_TARGETS_2_DN		317	-0.16382349	-0.7533729	1	0.9802157	1	3700	tags=23%, list=21%, signal=28%
SCHLOSSER_MYC_TARGETS_REPRESSED_BY_SERUM	SCHLOSSER_MYC_TARGETS_REPRESSED_BY_SERUM		153	-0.1767953	-0.7489591	0.99450547	0.98449445	1	4656	tags=25%, list=26%, signal=34%
CHIARETTI_ACUTE_LYMPHOBLASTIC_LEUKEMIA_ZAP70	CHIARETTI_ACUTE_LYMPHOBLASTIC_LEUKEMIA_ZAP70		53	-0.20875466	-0.74775016	0.94382024	0.98507255	1	3344	tags=26%, list=19%, signal=32%
SHIPP_DLBCL_CURED_VS_FATAL_DN	SHIPP_DLBCL_CURED_VS_FATAL_DN		39	-0.21769099	-0.7456419	0.9093851	0.98654854	1	1936	tags=13%, list=11%, signal=14%
GENTILE_UV_RESPONSE_CLUSTER_D9	GENTILE_UV_RESPONSE_CLUSTER_D9		25	-0.245517	-0.7441744	0.8277778	0.9873218	1	3305	tags=28%, list=18%, signal=34%
REACTOME_SIGNALLING_TO_RAS	REACTOME_SIGNALLING_TO_RAS		26	-0.24460582	-0.74139994	0.8682635	0.98948795	1	2144	tags=19%, list=12%, signal=22%
CHAUHAN_RESPONSE_TO_METHOXYESTRADIOL_UP	CHAUHAN_RESPONSE_TO_METHOXYESTRADIOL_UP		49	-0.2044185	-0.74052906	0.9328859	0.9895615	1	3337	tags=22%, list=19%, signal=27%
SUBTIL_PROGESTIN_TARGETS	SUBTIL_PROGESTIN_TARGETS		33	-0.22657943	-0.7401992	0.8871951	0.98908675	1	2779	tags=27%, list=15%, signal=32%
KYNG_WERNER_SYNDROM_AND_NORMAL_AGING_DN	KYNG_WERNER_SYNDROM_AND_NORMAL_AGING_DN		195	-0.16779527	-0.73418987	1	0.9945877	1	2335	tags=12%, list=13%, signal=13%
REACTOME_ARMS_MEDIATED_ACTIVATION	REACTOME_ARMS_MEDIATED_ACTIVATION		16	-0.2711071	-0.733226	0.8423913	0.9947422	1	2661	tags=19%, list=15%, signal=22%
IVANOVA_HEMATOPOIESIS_EARLY_PROGENITOR	IVANOVA_HEMATOPOIESIS_EARLY_PROGENITOR		466	-0.15389733	-0.7311514	1	0.9960102	1	3598	tags=19%, list=20%, signal=24%
MOOTHA_MITOCHONDRIA	MOOTHA_MITOCHONDRIA		413	-0.15707491	-0.7302507	1	0.9960894	1	3381	tags=17%, list=19%, signal=20%
LIU_SOX4_TARGETS_DN	LIU_SOX4_TARGETS_DN		283	-0.16049708	-0.72976583	1	0.9957231	1	3080	tags=15%, list=17%, signal=18%
AKL_HTLV1_INFECTION_UP	AKL_HTLV1_INFECTION_UP		25	-0.24437365	-0.72900206	0.86206895	0.99567527	1	1759	tags=20%, list=10%, signal=22%
KEGG_OTHER_GLYCAN_DEGRADATION	KEGG_OTHER_GLYCAN_DEGRADATION		15	-0.274531	-0.72840655	0.8541667	0.9953744	1	3869	tags=47%, list=21%, signal=59%
REACTOME_RNA_POL_III_TRANSCRIPTION_INITIATION_FROM_TYPE_3_PROMOTER	REACTOME_RNA_POL_III_TRANSCRIPTION_INITIATION_FROM_TYPE_3_PROMOTER		26	-0.23252515	-0.72346526	0.8761905	0.9992074	1	4757	tags=38%, list=26%, signal=52%
MAGRANGEAS_MULTIPLE_MYELOMA_IGLL_VS_IGLK_DN	MAGRANGEAS_MULTIPLE_MYELOMA_IGLL_VS_IGLK_DN		21	-0.25299355	-0.721157	0.8683386	1	1	4057	tags=38%, list=22%, signal=49%
REACTOME_RNA_POL_III_TRANSCRIPTION_INITIATION_FROM_TYPE_2_PROMOTER	REACTOME_RNA_POL_III_TRANSCRIPTION_INITIATION_FROM_TYPE_2_PROMOTER		23	-0.23328967	-0.7207201	0.88022286	1	1	4558	tags=30%, list=25%, signal=41%
REACTOME_APOPTOSIS	REACTOME_APOPTOSIS		131	-0.17199707	-0.72032	0.9897959	0.9996013	1	2948	tags=18%, list=16%, signal=22%
WHITFIELD_CELL_CYCLE_M_G1	WHITFIELD_CELL_CYCLE_M_G1		132	-0.17421338	-0.7196603	0.9906977	0.9993552	1	1550	tags=8%, list=9%, signal=9%
REACTOME_CLASS_I_MHC_MEDIATED_ANTIGEN_PROCESSING_PRESENTATION	REACTOME_CLASS_I_MHC_MEDIATED_ANTIGEN_PROCESSING_PRESENTATION		219	-0.16381074	-0.71916515	1	0.99899197	1	2505	tags=12%, list=14%, signal=14%
MORI_PLASMA_CELL_UP	MORI_PLASMA_CELL_UP		49	-0.20090155	-0.7185759	0.9739777	0.99869305	1	995	tags=6%, list=6%, signal=6%
REACTOME_VIF_MEDIATED_DEGRADATION_OF_APOBEC3G	REACTOME_VIF_MEDIATED_DEGRADATION_OF_APOBEC3G		48	-0.20825283	-0.7182155	0.9465409	0.99822366	1	89	tags=2%, list=0%, signal=2%
KYNG_RESPONSE_TO_H2O2_VIA_ERCC6_UP	KYNG_RESPONSE_TO_H2O2_VIA_ERCC6_UP		36	-0.2193159	-0.7161179	0.9177632	0.9992318	1	2330	tags=17%, list=13%, signal=19%
SAKAI_TUMOR_INFILTRATING_MONOCYTES_DN	SAKAI_TUMOR_INFILTRATING_MONOCYTES_DN		75	-0.18459831	-0.71273607	0.9771863	1	1	4111	tags=27%, list=23%, signal=34%
REACTOME_GLUTATHIONE_CONJUGATION	REACTOME_GLUTATHIONE_CONJUGATION		17	-0.25657806	-0.7126649	0.8746518	1	1	2539	tags=29%, list=14%, signal=34%
WILENSKY_RESPONSE_TO_DARAPLADIB	WILENSKY_RESPONSE_TO_DARAPLADIB		17	-0.2653458	-0.7123649	0.8902077	0.99989986	1	1613	tags=18%, list=9%, signal=19%
SCHLOSSER_MYC_TARGETS_AND_SERUM_RESPONSE_UP	SCHLOSSER_MYC_TARGETS_AND_SERUM_RESPONSE_UP		46	-0.20143165	-0.7112729	0.95498395	1	1	4848	tags=33%, list=27%, signal=44%
JOHANSSON_GLIOMAGENESIS_BY_PDGFB_DN	JOHANSSON_GLIOMAGENESIS_BY_PDGFB_DN		19	-0.25201905	-0.711264	0.8838527	0.9992608	1	1345	tags=11%, list=7%, signal=11%
SABATES_COLORECTAL_ADENOMA_SIZE_UP	SABATES_COLORECTAL_ADENOMA_SIZE_UP		16	-0.2594226	-0.7079037	0.8847185	1	1	3446	tags=31%, list=19%, signal=39%
ST_MYOCYTE_AD_PATHWAY	ST_MYOCYTE_AD_PATHWAY		20	-0.24629593	-0.7053881	0.8624642	1	1	866	tags=10%, list=5%, signal=10%
PID_A6B1_A6B4_INTEGRIN_PATHWAY	PID_A6B1_A6B4_INTEGRIN_PATHWAY		41	-0.20696181	-0.704036	0.9477124	1	1	1671	tags=12%, list=9%, signal=13%
GUTIERREZ_MULTIPLE_MYELOMA_UP	GUTIERREZ_MULTIPLE_MYELOMA_UP		32	-0.21665971	-0.70369935	0.92284864	1	1	677	tags=6%, list=4%, signal=6%
REACTOME_BRANCHED_CHAIN_AMINO_ACID_CATABOLISM	REACTOME_BRANCHED_CHAIN_AMINO_ACID_CATABOLISM		17	-0.25598916	-0.7027229	0.88	1	1	4213	tags=35%, list=23%, signal=46%
BIOCARTA_BAD_PATHWAY	BIOCARTA_BAD_PATHWAY		20	-0.24050188	-0.698151	0.887538	1	1	1347	tags=15%, list=7%, signal=16%
HOLLEMAN_PREDNISOLONE_RESISTANCE_ALL_UP	HOLLEMAN_PREDNISOLONE_RESISTANCE_ALL_UP		19	-0.24883287	-0.69778275	0.89085543	1	1	3654	tags=37%, list=20%, signal=46%
KEGG_NOD_LIKE_RECEPTOR_SIGNALING_PATHWAY	KEGG_NOD_LIKE_RECEPTOR_SIGNALING_PATHWAY		46	-0.19848561	-0.6973401	0.94736844	1	1	3964	tags=33%, list=22%, signal=42%
KYNG_ENVIRONMENTAL_STRESS_RESPONSE_NOT_BY_4NQO_IN_WS	KYNG_ENVIRONMENTAL_STRESS_RESPONSE_NOT_BY_4NQO_IN_WS		35	-0.21483423	-0.6950159	0.9537954	1	1	3019	tags=20%, list=17%, signal=24%
REACTOME_DEADENYLATION_DEPENDENT_MRNA_DECAY	REACTOME_DEADENYLATION_DEPENDENT_MRNA_DECAY		43	-0.20423533	-0.6935549	0.94863015	1	1	5275	tags=37%, list=29%, signal=52%
SIG_REGULATION_OF_THE_ACTIN_CYTOSKELETON_BY_RHO_GTPASES	SIG_REGULATION_OF_THE_ACTIN_CYTOSKELETON_BY_RHO_GTPASES		31	-0.2170367	-0.6922119	0.95409834	1	1	2997	tags=19%, list=17%, signal=23%
WATANABE_RECTAL_CANCER_RADIOTHERAPY_RESPONSIVE_DN	WATANABE_RECTAL_CANCER_RADIOTHERAPY_RESPONSIVE_DN		83	-0.17794894	-0.6918361	0.987013	1	1	1865	tags=10%, list=10%, signal=11%
SCHLINGEMANN_SKIN_CARCINOGENESIS_TPA_DN	SCHLINGEMANN_SKIN_CARCINOGENESIS_TPA_DN		22	-0.2347797	-0.6917692	0.90294117	1	1	2427	tags=18%, list=13%, signal=21%
HOLLEMAN_VINCRISTINE_RESISTANCE_ALL_DN	HOLLEMAN_VINCRISTINE_RESISTANCE_ALL_DN		19	-0.24147244	-0.69116855	0.90434784	1	1	2499	tags=16%, list=14%, signal=18%
SCHEIDEREIT_IKK_TARGETS	SCHEIDEREIT_IKK_TARGETS		17	-0.2501675	-0.6909708	0.89896375	1	1	3137	tags=29%, list=17%, signal=36%
EHLERS_ANEUPLOIDY_UP	EHLERS_ANEUPLOIDY_UP		40	-0.21293586	-0.6909476	0.95789474	1	1	4628	tags=40%, list=26%, signal=54%
WATANABE_ULCERATIVE_COLITIS_WITH_CANCER_UP	WATANABE_ULCERATIVE_COLITIS_WITH_CANCER_UP		18	-0.24543618	-0.68901116	0.90332323	1	1	3550	tags=39%, list=20%, signal=48%
KORKOLA_YOLK_SAC_TUMOR_UP	KORKOLA_YOLK_SAC_TUMOR_UP		18	-0.25080505	-0.6881612	0.88705236	1	1	4899	tags=44%, list=27%, signal=61%
MOOTHA_FFA_OXYDATION	MOOTHA_FFA_OXYDATION		22	-0.23107973	-0.6872102	0.8953168	1	1	3474	tags=27%, list=19%, signal=34%
HOFFMANN_PRE_BI_TO_LARGE_PRE_BII_LYMPHOCYTE_UP	HOFFMANN_PRE_BI_TO_LARGE_PRE_BII_LYMPHOCYTE_UP		29	-0.21991642	-0.6806994	0.9417178	1	1	1414	tags=14%, list=8%, signal=15%
FLECHNER_PBL_KIDNEY_TRANSPLANT_REJECTED_VS_OK_DN	FLECHNER_PBL_KIDNEY_TRANSPLANT_REJECTED_VS_OK_DN		47	-0.19145586	-0.6802215	0.96369636	1	1	3050	tags=17%, list=17%, signal=20%
GINESTIER_BREAST_CANCER_ZNF217_AMPLIFIED_DN	GINESTIER_BREAST_CANCER_ZNF217_AMPLIFIED_DN		301	-0.14544123	-0.6798348	1	1	1	2875	tags=13%, list=16%, signal=16%
KAAB_FAILED_HEART_VENTRICLE_DN	KAAB_FAILED_HEART_VENTRICLE_DN		33	-0.20987135	-0.6784409	0.96072507	1	1	49	tags=3%, list=0%, signal=3%
WANG_TUMOR_INVASIVENESS_UP	WANG_TUMOR_INVASIVENESS_UP		346	-0.1450899	-0.67729443	1	1	1	4268	tags=22%, list=24%, signal=28%
KEGG_RIG_I_LIKE_RECEPTOR_SIGNALING_PATHWAY	KEGG_RIG_I_LIKE_RECEPTOR_SIGNALING_PATHWAY		51	-0.18970297	-0.6733865	0.97959185	1	1	3712	tags=25%, list=21%, signal=32%
MOOTHA_VOXPHOS	MOOTHA_VOXPHOS		85	-0.17312834	-0.6731968	0.98723406	1	1	14930	tags=100%, list=83%, signal=578%
CHIN_BREAST_CANCER_COPY_NUMBER_UP	CHIN_BREAST_CANCER_COPY_NUMBER_UP		21	-0.23335348	-0.67029387	0.9219219	1	1	1929	tags=19%, list=11%, signal=21%
REACTOME_HOST_INTERACTIONS_OF_HIV_FACTORS	REACTOME_HOST_INTERACTIONS_OF_HIV_FACTORS		115	-0.16090134	-0.66798276	1	1	1	4196	tags=23%, list=23%, signal=30%
KEGG_NICOTINATE_AND_NICOTINAMIDE_METABOLISM	KEGG_NICOTINATE_AND_NICOTINAMIDE_METABOLISM		20	-0.23430115	-0.6677974	0.91922003	1	1	3139	tags=20%, list=17%, signal=24%
WONG_MITOCHONDRIA_GENE_MODULE	WONG_MITOCHONDRIA_GENE_MODULE		210	-0.14974423	-0.6630061	1	1	1	4050	tags=20%, list=22%, signal=25%
REACTOME_HIV_INFECTION	REACTOME_HIV_INFECTION		182	-0.15183587	-0.66051686	1	1	1	4196	tags=23%, list=23%, signal=30%
CHEOK_RESPONSE_TO_MERCAPTOPURINE_DN	CHEOK_RESPONSE_TO_MERCAPTOPURINE_DN		16	-0.24567412	-0.6601313	0.92771083	1	1	903	tags=13%, list=5%, signal=13%
BILANGES_RAPAMYCIN_SENSITIVE_GENES	BILANGES_RAPAMYCIN_SENSITIVE_GENES		37	-0.1945227	-0.6575491	0.9557823	1	1	3391	tags=24%, list=19%, signal=30%
MENSSEN_MYC_TARGETS	MENSSEN_MYC_TARGETS		49	-0.18423885	-0.6553137	0.9893993	1	1	4435	tags=22%, list=25%, signal=30%
REACTOME_PROLONGED_ERK_ACTIVATION_EVENTS	REACTOME_PROLONGED_ERK_ACTIVATION_EVENTS		18	-0.23132658	-0.6536322	0.92777777	1	1	2661	tags=17%, list=15%, signal=20%
MAYBURD_RESPONSE_TO_L663536_DN	MAYBURD_RESPONSE_TO_L663536_DN		51	-0.18565954	-0.6519097	0.9790941	1	1	4110	tags=33%, list=23%, signal=43%
SA_PTEN_PATHWAY	SA_PTEN_PATHWAY		17	-0.23530895	-0.64952576	0.9478528	1	1	4628	tags=41%, list=26%, signal=55%
REACTOME_SHC_MEDIATED_SIGNALLING	REACTOME_SHC_MEDIATED_SIGNALLING		15	-0.24214506	-0.64812624	0.920904	1	1	1527	tags=13%, list=8%, signal=15%
MARIADASON_RESPONSE_TO_CURCUMIN_SULINDAC_7	MARIADASON_RESPONSE_TO_CURCUMIN_SULINDAC_7		15	-0.24202205	-0.6475462	0.93837535	1	1	2642	tags=20%, list=15%, signal=23%
HAHTOLA_CTCL_CUTANEOUS	HAHTOLA_CTCL_CUTANEOUS		19	-0.22424737	-0.6413427	0.91150445	1	1	4813	tags=37%, list=27%, signal=50%
PID_P53_REGULATION_PATHWAY	PID_P53_REGULATION_PATHWAY		58	-0.17425497	-0.63719714	0.99264705	1	1	3036	tags=17%, list=17%, signal=21%
MATZUK_SPERMATOGONIA	MATZUK_SPERMATOGONIA		16	-0.23372404	-0.63620764	0.91944444	1	1	2220	tags=19%, list=12%, signal=21%
PEPPER_CHRONIC_LYMPHOCYTIC_LEUKEMIA_UP	PEPPER_CHRONIC_LYMPHOCYTIC_LEUKEMIA_UP		22	-0.21046178	-0.6343924	0.9649123	1	1	1019	tags=9%, list=6%, signal=10%
REACTOME_P53_INDEPENDENT_G1_S_DNA_DAMAGE_CHECKPOINT	REACTOME_P53_INDEPENDENT_G1_S_DNA_DAMAGE_CHECKPOINT		47	-0.17900924	-0.6337957	0.9864865	1	1	12327	tags=96%, list=68%, signal=302%
REACTOME_SCF_BETA_TRCP_MEDIATED_DEGRADATION_OF_EMI1	REACTOME_SCF_BETA_TRCP_MEDIATED_DEGRADATION_OF_EMI1		48	-0.17895567	-0.6286275	0.9830508	1	1	12327	tags=96%, list=68%, signal=302%
KYNG_WERNER_SYNDROM_DN	KYNG_WERNER_SYNDROM_DN		24	-0.2044191	-0.6275563	0.95987654	1	1	1430	tags=13%, list=8%, signal=14%
SCHLOSSER_SERUM_RESPONSE_AUGMENTED_BY_MYC	SCHLOSSER_SERUM_RESPONSE_AUGMENTED_BY_MYC		94	-0.16041431	-0.62598306	1	1	1	2642	tags=12%, list=15%, signal=14%
REACTOME_CDK_MEDIATED_PHOSPHORYLATION_AND_REMOVAL_OF_CDC6	REACTOME_CDK_MEDIATED_PHOSPHORYLATION_AND_REMOVAL_OF_CDC6		45	-0.17947024	-0.6250333	0.99298245	1	1	12327	tags=96%, list=68%, signal=301%
REACTOME_SIGNALLING_TO_ERKS	REACTOME_SIGNALLING_TO_ERKS		35	-0.18734391	-0.6228146	0.9863946	1	1	4538	tags=34%, list=25%, signal=46%
CARDOSO_RESPONSE_TO_GAMMA_RADIATION_AND_3AB	CARDOSO_RESPONSE_TO_GAMMA_RADIATION_AND_3AB		16	-0.22813183	-0.622412	0.92957747	1	1	3340	tags=31%, list=19%, signal=38%
REACTOME_INFLUENZA_VIRAL_RNA_TRANSCRIPTION_AND_REPLICATION	REACTOME_INFLUENZA_VIRAL_RNA_TRANSCRIPTION_AND_REPLICATION		99	-0.15554126	-0.6203692	1	1	1	14369	tags=99%, list=80%, signal=484%
GAZDA_DIAMOND_BLACKFAN_ANEMIA_MYELOID_DN	GAZDA_DIAMOND_BLACKFAN_ANEMIA_MYELOID_DN		33	-0.19293797	-0.6178814	0.97832817	1	1	3278	tags=18%, list=18%, signal=22%
LINDGREN_BLADDER_CANCER_CLUSTER_1_UP	LINDGREN_BLADDER_CANCER_CLUSTER_1_UP		104	-0.15208586	-0.61513156	1	1	1	4640	tags=33%, list=26%, signal=44%
REACTOME_CROSS_PRESENTATION_OF_SOLUBLE_EXOGENOUS_ANTIGENS_ENDOSOMES	REACTOME_CROSS_PRESENTATION_OF_SOLUBLE_EXOGENOUS_ANTIGENS_ENDOSOMES		43	-0.18022057	-0.6114933	0.9856115	1	1	12327	tags=95%, list=68%, signal=300%
HOLLEMAN_ASPARAGINASE_RESISTANCE_ALL_DN	HOLLEMAN_ASPARAGINASE_RESISTANCE_ALL_DN		23	-0.2035639	-0.6113689	0.95522386	1	1	14371	tags=100%, list=80%, signal=491%
PID_ARF_3PATHWAY	PID_ARF_3PATHWAY		19	-0.21043885	-0.6104645	0.9551282	1	1	1901	tags=11%, list=11%, signal=12%
REACTOME_MITOCHONDRIAL_TRNA_AMINOACYLATION	REACTOME_MITOCHONDRIAL_TRNA_AMINOACYLATION		21	-0.20632419	-0.60952294	0.94262296	1	1	4866	tags=29%, list=27%, signal=39%
REACTOME_LYSOSOME_VESICLE_BIOGENESIS	REACTOME_LYSOSOME_VESICLE_BIOGENESIS		21	-0.20740913	-0.6049407	0.9650146	1	1	3157	tags=19%, list=18%, signal=23%
BIOCARTA_RHO_PATHWAY	BIOCARTA_RHO_PATHWAY		29	-0.18700199	-0.5995557	0.9872612	1	1	2612	tags=14%, list=14%, signal=16%
IIZUKA_LIVER_CANCER_PROGRESSION_G1_G2_DN	IIZUKA_LIVER_CANCER_PROGRESSION_G1_G2_DN		24	-0.19695233	-0.5988881	0.98542273	1	1	1710	tags=8%, list=9%, signal=9%
HASLINGER_B_CLL_WITH_CHROMOSOME_12_TRISOMY	HASLINGER_B_CLL_WITH_CHROMOSOME_12_TRISOMY		21	-0.20589913	-0.5987918	0.9714286	1	1	3948	tags=29%, list=22%, signal=37%
RAHMAN_TP53_TARGETS_PHOSPHORYLATED	RAHMAN_TP53_TARGETS_PHOSPHORYLATED		21	-0.20273666	-0.59172994	0.96385545	1	1	6017	tags=48%, list=33%, signal=71%
HONMA_DOCETAXEL_RESISTANCE	HONMA_DOCETAXEL_RESISTANCE		34	-0.1788532	-0.5913153	0.9931507	1	1	1475	tags=9%, list=8%, signal=10%
SEIDEN_MET_SIGNALING	SEIDEN_MET_SIGNALING		18	-0.2148043	-0.5898762	0.96022725	1	1	4241	tags=39%, list=24%, signal=51%
REACTOME_AUTODEGRADATION_OF_THE_E3_UBIQUITIN_LIGASE_COP1	REACTOME_AUTODEGRADATION_OF_THE_E3_UBIQUITIN_LIGASE_COP1		46	-0.16536015	-0.57915795	1	1	1	12327	tags=96%, list=68%, signal=301%
REACTOME_SIGNALING_BY_FGFR1_FUSION_MUTANTS	REACTOME_SIGNALING_BY_FGFR1_FUSION_MUTANTS		18	-0.2097769	-0.5758004	0.96486485	1	1	1679	tags=17%, list=9%, signal=18%
VALK_AML_CLUSTER_16	VALK_AML_CLUSTER_16		19	-0.20009461	-0.5756158	0.96892655	1	1	2292	tags=21%, list=13%, signal=24%
PID_SYNDECAN_3_PATHWAY	PID_SYNDECAN_3_PATHWAY		15	-0.21723449	-0.5743018	0.9529086	1	1	14123	tags=100%, list=78%, signal=460%
PID_DNA_PK_PATHWAY	PID_DNA_PK_PATHWAY		15	-0.21229118	-0.571551	0.97831976	1	1	2952	tags=20%, list=16%, signal=24%
WAGNER_APO2_SENSITIVITY	WAGNER_APO2_SENSITIVITY		15	-0.2152536	-0.56990635	0.9597855	1	1	2578	tags=20%, list=14%, signal=23%
WIKMAN_ASBESTOS_LUNG_CANCER_UP	WIKMAN_ASBESTOS_LUNG_CANCER_UP		15	-0.21512596	-0.56121343	0.97066665	1	1	14161	tags=100%, list=79%, signal=465%
REACTOME_TRNA_AMINOACYLATION	REACTOME_TRNA_AMINOACYLATION		42	-0.16121145	-0.5606369	1	1	1	15137	tags=100%, list=84%, signal=621%
REACTOME_METABOLISM_OF_POLYAMINES	REACTOME_METABOLISM_OF_POLYAMINES		15	-0.21116248	-0.55804014	0.982906	1	1	4174	tags=33%, list=23%, signal=43%
RAMPON_ENRICHED_LEARNING_ENVIRONMENT_LATE_UP	RAMPON_ENRICHED_LEARNING_ENVIRONMENT_LATE_UP		21	-0.19310613	-0.55692697	0.9705882	1	1	14559	tags=100%, list=81%, signal=518%
SCHLOSSER_MYC_AND_SERUM_RESPONSE_SYNERGY	SCHLOSSER_MYC_AND_SERUM_RESPONSE_SYNERGY		32	-0.1718493	-0.55688107	1	1	1	3354	tags=22%, list=19%, signal=27%
KEGG_ENDOMETRIAL_CANCER	KEGG_ENDOMETRIAL_CANCER		49	-0.15210004	-0.5382552	1	1	1	2947	tags=16%, list=16%, signal=19%
REACTOME_AUTODEGRADATION_OF_CDH1_BY_CDH1_APC_C	REACTOME_AUTODEGRADATION_OF_CDH1_BY_CDH1_APC_C		56	-0.14688225	-0.53437364	1	1	1	12327	tags=95%, list=68%, signal=298%
HEDENFALK_BREAST_CANCER_BRACX_DN	HEDENFALK_BREAST_CANCER_BRACX_DN		20	-0.17979437	-0.5272259	0.9895013	1	1	3765	tags=25%, list=21%, signal=32%
KEGG_PROTEASOME	KEGG_PROTEASOME		41	-0.15480776	-0.52133375	1	1	1	12327	tags=95%, list=68%, signal=300%
REACTOME_METABOLISM_OF_RNA	REACTOME_METABOLISM_OF_RNA		251	-0.11400345	-0.51595575	1	1	1	5335	tags=29%, list=30%, signal=40%
GINESTIER_BREAST_CANCER_20Q13_AMPLIFICATION_UP	GINESTIER_BREAST_CANCER_20Q13_AMPLIFICATION_UP		108	-0.1251366	-0.5137091	1	1	1	731	tags=4%, list=4%, signal=4%
REACTOME_TCA_CYCLE_AND_RESPIRATORY_ELECTRON_TRANSPORT	REACTOME_TCA_CYCLE_AND_RESPIRATORY_ELECTRON_TRANSPORT		113	-0.12528794	-0.5102381	1	1	1	14675	tags=98%, list=81%, signal=524%
BARRIER_CANCER_RELAPSE_TUMOR_SAMPLE_UP	BARRIER_CANCER_RELAPSE_TUMOR_SAMPLE_UP		15	-0.18489367	-0.5022994	0.99436617	1	1	4007	tags=33%, list=22%, signal=43%
REACTOME_TRANSLATION	REACTOME_TRANSLATION		142	-0.11496272	-0.48286846	1	1	1	11131	tags=92%, list=62%, signal=237%
PELLICCIOTTA_HDAC_IN_ANTIGEN_PRESENTATION_DN	PELLICCIOTTA_HDAC_IN_ANTIGEN_PRESENTATION_DN		49	-0.13496184	-0.4813152	1	1	1	3088	tags=16%, list=17%, signal=20%
REACTOME_RNA_POL_II_TRANSCRIPTION	REACTOME_RNA_POL_II_TRANSCRIPTION		96	-0.11856591	-0.48075935	1	1	1	4432	tags=26%, list=25%, signal=34%
CHOW_RASSF1_TARGETS_DN	CHOW_RASSF1_TARGETS_DN		28	-0.14999963	-0.47940534	1	1	1	3473	tags=21%, list=19%, signal=26%
YAO_TEMPORAL_RESPONSE_TO_PROGESTERONE_CLUSTER_13	YAO_TEMPORAL_RESPONSE_TO_PROGESTERONE_CLUSTER_13		167	-0.10985888	-0.477959	1	1	1	4946	tags=28%, list=27%, signal=38%
KEGG_SELENOAMINO_ACID_METABOLISM	KEGG_SELENOAMINO_ACID_METABOLISM		25	-0.14629136	-0.4631096	0.99707603	1	1	15403	tags=100%, list=85%, signal=684%
MELLMAN_TUT1_TARGETS_UP	MELLMAN_TUT1_TARGETS_UP		17	-0.1661118	-0.46251595	0.9972145	1	1	3570	tags=24%, list=20%, signal=29%
KEGG_CITRATE_CYCLE_TCA_CYCLE	KEGG_CITRATE_CYCLE_TCA_CYCLE		28	-0.13831973	-0.4297542	1	1	1	15547	tags=100%, list=86%, signal=723%
REACTOME_DESTABILIZATION_OF_MRNA_BY_AUF1_HNRNP_D0	REACTOME_DESTABILIZATION_OF_MRNA_BY_AUF1_HNRNP_D0		49	-0.117411606	-0.42064282	1	1	1	15926	tags=100%, list=88%, signal=852%
REACTOME_INFLUENZA_LIFE_CYCLE	REACTOME_INFLUENZA_LIFE_CYCLE		133	-0.09350946	-0.3903398	1	0.99987763	1	14369	tags=98%, list=80%, signal=477%
