# Supplementary material for: Metabolic reprogramming of cancer cells by JMJD6-mediated pre-mRNA splicing associated with therapeutic response to splicing inhibitor
Source: eLife. 2024 Mar 15;12:RP90993. doi: 10.7554/eLife.90993 (PMC10942784; doi:10.7554/eLife.90993)
Supplement: Source data 1. [file elife-90993-data1.zip › Figure 3A-D-source data. Correlation of JMJD6 KO and its co-dependency genes.csv]

Feature	Correlation	p value
JMJD6	1	Infinity
PCBP1	0.310367157	23.62147688
UBE2O	0.288367112	20.37244162
MFSD11	0.240656062	14.25729982
ARHGDIA	0.240472597	14.23614564
LGALS3BP	0.240265691	14.21230973
ENDOV	0.236725195	13.80790244
SON	0.232818897	13.36927411
CENPX	0.230957198	13.16300669
CASKIN2	0.219253882	11.90703741
GLI4	0.216023937	11.57267021
GALK1	0.215927437	11.56276134
METTL23	0.213405298	11.30544543
TMEM240	0.211909614	11.15436025
PRPF40A	0.210087666	10.97183119
EPOP	0.208465955	10.81075748
MIF4GD	0.2070901	10.67513064
ZACN	0.201277604	10.11252362
DCXR	0.19770558	9.77505341
PSMF1	0.197271214	9.73444396
RBM39	0.197261519	9.733538661
KRTAP21-3	0.192535766	9.297711685
JOSD1	0.192477934	9.292445673
SERINC4	0.19141626	9.196063356
TRIM65	0.188892211	8.969121483
THOC3	0.187985835	8.888381732
PPP1R2	0.187622718	8.856146961
ARMC7	0.186191192	8.729688379
MUC20	0.185328268	8.6539374
USH1G	0.185173526	8.640391542
BUD13	0.18414915	8.551010375
ZNF672	0.1825825	8.415290685
OVCA2	0.180078464	8.200813419
ABCG1	0.179927707	8.187996648
XXYLT1	0.179434347	8.146129098
ARGLU1	0.178962204	8.106171229
ELL3	0.178722349	8.085912942
HDAC4	0.178151509	8.037809991
RAP2A	0.178026423	8.027290225
YY1	0.177599515	7.991443286
ILKAP	0.17744152	7.978198681
MRGBP	0.177263382	7.963279836
RSAD1	0.176629112	7.910283322
NIPAL2	0.176571641	7.905490829
ATP5MC1	0.1761657	7.871684123
CNOT9	0.17503229	7.777709578
CHRND	0.172930251	7.605040226
CENPW	0.172859289	7.599247749
AP3S2	0.17281439	7.595583903
NT5C	0.172352621	7.557958913
ANP32E	0.172055924	7.533837281
HID1	0.171838402	7.516179156
SDF2L1	0.171644217	7.500434428
PCMTD2	0.17140349	7.480940884
FSCN2	0.171306939	7.473130018
ZNF346	0.171056746	7.452910399
PGBD2	0.170941332	7.443593054
FAM110C	0.17089796	7.440093301
H2AC20	0.170646241	7.419799173
RABL2B	0.17061622	7.41738084
MTNR1A	0.170548166	7.411900268
SPHK1	0.170357047	7.396520687
KCMF1	0.170321836	7.393689116
GH2	0.169520588	7.329412989
C8orf33	0.168101784	7.216340264
CDKN2AIP	0.168085444	7.215043556
SIMC1	0.167827115	7.194559939
NPB	0.167740572	7.187704737
CCDC130	0.167407055	7.161319402
RHOF	0.166996757	7.128931609
BAIAP2	0.166753376	7.109757247
FRG1	0.166550119	7.093765299
SCFD1	0.166466121	7.087162188
RPA2	0.166292486	7.073523108
THAP3	0.16622819	7.068476216
DNM1	0.166127731	7.060594688
C1orf35	0.16587675	7.040924629
P4HB	0.165704197	7.027418278
STUB1	0.165482178	7.010060717
RAB4A	0.165241053	6.991235636
SH3BP5L	0.164819302	6.958374413
LTN1	0.164746458	6.952707145
RAB26	0.164164213	6.907497925
DGKE	0.163268779	6.838280907
SDHAF1	0.16277276	6.800100346
HES1	0.162657162	6.791218854
SLC38A10	0.162436297	6.774267033
PIGP	0.162259257	6.760695318
PYCR1	0.162248475	6.759869258
DIPK1B	0.161896542	6.732935745
GLRX3	0.161857218	6.72992985
TMEM94	0.161614214	6.711370938
ABHD11	0.161574528	6.708342632
SLC46A3	0.160814117	6.650460335
DHRS1	0.160383028	6.61776586
INS	0.160370417	6.616810703
RBM34	0.160105972	6.59679928
WBP2	0.159913989	6.582291698
LRRC45	0.159347734	6.539601599
RHOQ	0.159093936	6.520516217
ACAP3	0.159055727	6.517645565
HOXC10	0.158243771	6.456803191
TCERG1	0.157979775	6.437087278
RPAIN	0.157873462	6.429156663
ARSA	0.157749726	6.419933035
FIP1L1	0.157737128	6.418994315
METTL26	0.157722932	6.417936631
PCDHGC3	0.157511748	6.402213443
SLC25A10	0.156727694	6.344019749
LCMT2	0.156590223	6.333845909
ARV1	0.156208844	6.305666945
PPP4R2	0.156107584	6.298196554
LRRC1	0.155570765	6.258672208
HAUS1	0.155523332	6.255186306
NUDCD2	0.155458384	6.250414877
RAC3	0.154809775	6.202871836
FAM166A	0.154687145	6.193904927
BTG3	0.154437447	6.175668236
NISCH	0.154017849	6.145087824
HELZ	0.153987416	6.142873073
WDR76	0.153473944	6.105569253
CBX2	0.153436258	6.10283613
CBR1	0.152935806	6.066604229
PLEC	0.15225695	6.017641155
EIF5	0.152249531	6.01710727
INTS6	0.152013532	6.000136291
ANKRD10	0.151949274	5.995519892
CDKN2AIPNL	0.151773472	5.982899676
CCDC107	0.151240217	5.944706391
LIMD2	0.15109362	5.934229676
SLTM	0.150943027	5.923477632
MFSD3	0.150666319	5.903748618
MRFAP1L1	0.150663048	5.903515573
RNPC3	0.150156091	5.867462262
CFAP46	0.150139612	5.866292331
SLC7A5	0.150061442	5.860744201
ZNF454	0.150006621	5.856854949
JPT2	0.150002244	5.856544486
DKK1	0.149891346	5.848681387
RAB11A	0.149788634	5.841403724
SNRNP27	0.149406448	5.814366652
NSMF	0.149242931	5.802819424
DNAJC9	0.149059718	5.789895929
SAMD11	0.148923499	5.780297315
JMJD8	0.148725378	5.766351987
SRPRA	0.148476355	5.748849406
RAB5A	0.148451602	5.747111169
PCBP2	0.148318393	5.737761797
RBM10	0.148174939	5.702613233
STRN	0.148071755	5.720472803
UTS2B	0.147810454	5.702186414
ALPG	0.147672138	5.692519485
H2AZ1	0.147652108	5.69112036
DDX27	0.147514764	5.681531232
H2AC12	0.147290464	5.665889763
GBX2	0.146670194	5.622755437
MNT	0.146605889	5.618293687
CHKA	0.146589919	5.617185883
SF3B1	0.146469521	5.608838183
WDR46	0.146108272	5.583830954
PSCA	0.146000482	5.576380833
BCLAF1	0.145948985	5.572823388
TARBP1	0.145907621	5.569966823
C17orf58	0.145805985	5.562951266
PPP2R2C	0.145585528	5.547750194
UBE2A	0.145195054	5.496764129
CST3	0.145186163	5.520269591
PHYKPL	0.144712397	5.487763933
CWF19L2	0.144487893	5.472396354
KLF6	0.144484242	5.472146609
DNAJC1	0.144299217	5.459499004
SECTM1	0.144053809	5.442747981
PCF11	0.143644968	5.414902456
HOXB9	0.143536185	5.407506263
MTFP1	0.143520971	5.406472327
MST1	0.142893639	5.363929575
ZNF785	0.142354906	5.327538479
C8orf82	0.142025361	5.305343075
PIGH	0.141645759	5.279837631
PTPN23	0.141620752	5.278159721
MEMO1	0.14141292	5.264225635
DPM2	0.141260043	5.253988593
CHAMP1	0.141033276	5.238823198
BCL2L1	0.140797079	5.223052093
TRIM47	0.140736677	5.219023042
MAFG	0.140678754	5.215160943
BORCS5	0.140561456	5.2073446
HSPA6	0.140421612	5.198034004
KLF5	0.140397622	5.196437651
C2orf68	0.140332381	5.192097783
TACC3	0.139835101	5.159081853
MX2	0.13980554	5.157122784
MIEN1	0.13970596	5.150526202
CDHR5	0.139653231	5.147035005
SMYD2	0.139443534	5.133163578
STAT5A	0.139346066	5.126722913
C1orf43	0.139253603	5.120616936
HNRNPR	0.13906362	5.108083221
SNAP29	0.139046909	5.106981522
PPP1R8	0.138956008	5.100991016
TK1	0.138737158	5.086583808
NUP88	0.138557699	5.074785991
NUP43	0.138545275	5.073969795
COPS6	0.13848841	5.070234813
BCAS3	0.138288853	5.057139111
EEF1AKMT2	0.137980904	5.036965858
PDCD6	0.13784114	5.027824278
EAPP	0.137761415	5.022613658
SAMD12	0.137215663	4.987022057
RDM1	0.137152177	4.982890497
NPHP3	0.136997564	4.972836271
DUSP14	0.136940169	4.96910674
DTNBP1	0.136896735	4.966285376
GIGYF1	0.136728821	4.955386063
ING2	0.136705411	4.953867547
SMNDC1	0.136661957	4.951049465
ACTR1A	0.136440313	4.936688867
HM13	0.1364016	4.934182841
TM9SF2	0.136287805	4.926820559
CYHR1	0.136252164	4.924515814
P3H4	0.136229391	4.923043509
MACROH2A1	0.135835166	4.897593598
TRA2B	0.135745738	4.891830205
FAM131A	0.135687905	4.88810494
VOPP1	0.135654503	4.885954014
ZNF721	0.135454647	4.873095086
COG8	0.135406327	4.869988819
ROR2	0.135288582	4.862424034
OPN1LW	0.13488841	4.81585192
ZNF280C	0.134591124	4.796922468
MMS22L	0.134545903	4.81485304
ZBTB45	0.134458332	4.809260226
LAMTOR4	0.134325691	4.800795543
RGS19	0.13418501	4.791826489
SMC4	0.134166898	4.790672435
CHRAC1	0.133897793	4.773542817
FBF1	0.133858481	4.77104312
PIK3C2A	0.133768584	4.765329687
PLA2G4D	0.133725482	4.762591604
VPS41	0.13366517	4.758761696
CSHL1	0.133600175	4.75463618
VAT1	0.133595255	4.754323947
BAIAP3	0.133460538	4.745779294
DEXI	0.133425022	4.743528
PAQR3	0.133162246	4.726888681
BOK	0.133100567	4.722987592
MSRB1	0.132673641	4.696032256
APOC1	0.132644152	4.694173453
NCAPG	0.132601029	4.691455855
GGA3	0.132370262	4.676927322
MOG	0.132334275	4.674663856
ACTG1	0.132303791	4.672746895
RBM42	0.132303604	4.67273517
KTI12	0.132230275	4.668125774
COL6A1	0.132220523	4.667512963
SLC4A1AP	0.132132363	4.661974886
CDC25C	0.131940113	4.649910117
CST5	0.131935555	4.649624304
ZNF185	0.131914359	4.628266836
SSH1	0.131761499	4.638715996
COL20A1	0.131751408	4.638084016
H3C1	0.131665181	4.632685542
AGRN	0.13157496	4.627040559
TIMP2	0.131548657	4.625395464
COPS9	0.131306907	4.610290446
HPCA	0.131269285	4.6079421
APOBEC3B	0.131159578	4.601097927
IFRD2	0.131141416	4.599965399
CEP131	0.13109396	4.597006849
SART1	0.131009082	4.591717892
MRM1	0.130962754	4.588832371
TUBB1	0.130799989	4.578702419
H3-3B	0.130791754	4.578190266
ARL4D	0.130739861	4.574963275
CARD6	0.130575886	4.564774526
SNORC	0.130571203	4.56448371
PLEKHG4B	0.130520463	4.561333451
ITPKA	0.130268353	4.54569806
GRHL2	0.130227797	4.543185538
ANKMY1	0.130201524	4.54155826
SHARPIN	0.130163185	4.539184166
RNF157	0.130106622	4.535682842
DRG1	0.130008685	4.529623797
NFKBIE	0.129954359	4.526264661
C21orf58	0.129942772	4.525548337
VCPKMT	0.129939108	4.525321887
ZNF728	0.129912234	4.523660826
BMP1	0.129717082	4.511608641
NT5C2	0.129697292	4.510387396
FAHD2A	0.129649353	4.507429804
LY6E	0.129569359	4.502496891
MEIOB	0.129502598	4.498382172
DLC1	0.129447586	4.494993136
RPUSD2	0.129416571	4.49308305
NALCN	0.129382488	4.490984484
NAT8	0.129370674	4.490257156
INTS6L	0.129360049	4.470315018
NAIP	0.129082749	4.472551331
SBF1	0.128833785	4.457271296
DUS1L	0.128448642	4.433688063
ERBB2	0.128434075	4.432797394
H2BC11	0.128376775	4.429294803
PPP1R27	0.128210253	4.419124156
LBR	0.128035624	4.408471707
COIL	0.127957892	4.403734418
ZNF250	0.127873389	4.398587479
ASZ1	0.127831752	4.39605265
ZCCHC4	0.127819817	4.395326176
INKA1	0.127762862	4.391860377
SIRT7	0.127760297	4.391704304
FUBP1	0.12772572	4.38960095
GPC1	0.127662333	4.385746474
ABHD16B	0.127613665	4.382788255
PPP4R3A	0.127588031	4.381230569
LRRC73	0.12757215	4.380265627
FBXO36	0.127566591	4.379927935
UHRF2	0.127498254	4.375777351
RRP15	0.127456117	4.373219119
KLHL35	0.127378854	4.368530397
SLC24A5	0.127322478	4.365110939
GAS1	0.127291497	4.363232335
FAT1	0.127276086	4.362298063
KDM2A	0.127030796	4.347441514
H2AC4	0.126860728	4.337156734
IGFBP3	0.126851724	4.336612616
SLC51A	0.126792527	4.333035946
BTBD17	0.126773235	4.331870687
RHBDF1	0.126751252	4.330543047
CNNM1	0.126530608	4.317229782
TRMT12	0.12644245	4.311916535
NMRAL1	0.126347658	4.306207328
MGST2	0.126299019	4.303279402
RBM48	0.126182244	4.296254286
KMO	0.126176752	4.295924003
FBH1	0.126080403	4.290132527
SPAG4	0.126039482	4.287674017
TINF2	0.125772711	4.27166495
ZFP57	0.12563471	4.263395842
SNPH	0.125580462	4.260147614
PPP1R15B	0.125493731	4.254957124
SERF2	0.125409121	4.249896751
TRIB2	0.125283168	4.242369694
PPIH	0.125243643	4.24000912
UBE2Z	0.125242716	4.239953747
PAQR6	0.125080815	4.230291693
UBR5	0.12486993	4.217723859
CLTB	0.124740834	4.210040044
TP53I3	0.124703357	4.207810762
BNIP2	0.124615627	4.202594801
ZBTB21	0.124615613	4.202593949
TMEM235	0.124564475	4.19955513
MXI1	0.124449208	4.192709763
HBZ	0.124419897	4.190969982
PFDN1	0.124337506	4.186081727
RAP1GAP2	0.124274668	4.182355552
RAD51D	0.124059141	4.169588583
CST2	0.123913559	4.160976592
TRADD	0.123832025	4.156157566
PTPA	0.123788022	4.153557934
ARRDC1	0.123732849	4.150299709
IPO5	0.12368731	4.1476114
ATP5MD	0.123544256	4.139172553
MAP3K11	0.123462158	4.134333621
C17orf50	0.123303363	4.124982629
GSDMD	0.123257728	4.12229739
KRTAP10-9	0.123194296	4.118566476
TOM1L1	0.123158213	4.116444903
TGM5	0.12310884	4.113542957
COG3	0.123101243	4.113096519
WDR24	0.122993337	4.106758307
CPT1B	0.122971703	4.105488206
TUBA4A	0.122970592	4.105422973
SLC25A4	0.122945491	4.103949558
TDRD7	0.122897685	4.101144238
SH3RF2	0.122883226	4.100295918
FAAP20	0.122799487	4.095384917
ZBTB11	0.122651805	4.086731403
TPM1	0.12264898	4.086565956
EEF1E1	0.122618718	4.08479399
TTI2	0.122578745	4.082453991
RNF44	0.122560815	4.081404642
LPO	0.122543338	4.080381895
MAP10	0.122529569	4.079576283
TCTE3	0.122388668	4.07133682
CRYGN	0.122274738	4.064680957
FMC1	0.122266691	4.064211067
PPP1R3E	0.122211555	4.060992272
PARK7	0.122115693	4.055399088
TNFRSF6B	0.122071212	4.052805172
HERC2	0.122062902	4.052320695
HLA-C	0.121797283	4.036850411
CRABP2	0.121766318	4.035048962
LSM14B	0.121717984	4.032237886
SRXN1	0.121664022	4.029100766
ZNHIT2	0.121587727	4.024667439
FAM13B	0.121426503	4.015307588
PI4K2A	0.121395983	4.013537069
ST6GALNAC1	0.12107751	3.99508636
AANAT	0.121070991	3.994709111
SDF4	0.121050257	3.99350951
SLC22A5	0.120909129	3.985349372
ARL6IP4	0.12082449	3.980459645
PFKL	0.120815725	3.979953474
EPM2AIP1	0.120811192	3.979691727
NEMF	0.120788176	3.978362746
SFXN1	0.1207109	3.973902393
ANKRD40	0.120654535	3.97065072
H2AC17	0.120488165	3.961061126
NRARP	0.120341185	3.952599367
NDUFAF8	0.12033487	3.952236021
SECISBP2L	0.120288113	3.949546294
GGTLC2	0.120140408	3.941055851
HSD11B1L	0.120012905	3.933734438
PDCD6IP	0.119975203	3.93157094
TCEANC	0.119916551	3.911527256
FNDC11	0.119898776	3.927187109
KANSL3	0.119880826	3.926157884
PCDHB15	0.119852479	3.924532819
SLC25A22	0.119681018	3.914710751
MGA	0.119498172	3.904250893
MAPK8IP3	0.11948611	3.903561363
TTLL11	0.119455627	3.90181919
FAAP100	0.119349793	3.895773571
ESPN	0.119241582	3.889597298
OGFR	0.119170977	3.885570212
EVPL	0.119104276	3.881767846
FXR1	0.119068489	3.879728566
TMED9	0.118892311	3.869697587
TCFL5	0.118802871	3.864610396
ING3	0.118625974	3.854559221
PCGF3	0.118587533	3.852376834
NID1	0.118583827	3.852166517
EP400	0.118565681	3.851136548
SNX22	0.118453894	3.844794983
NKX2-5	0.118433428	3.843634597
CCDC86	0.118358189	3.839370164
AMFR	0.118335323	3.838074637
MZF1	0.118261534	3.833895505
RBBP9	0.118126794	3.8262706
MAX	0.11802308	3.820406939
KREMEN2	0.117985666	3.818292812
RRAGA	0.117964117	3.817075456
AP1G2	0.117903271	3.813639173
MBOAT1	0.117895265	3.813187198
RGS12	0.117837283	3.809914386
THRB	0.117830648	3.809539966
SLC16A3	0.117796508	3.80761371
RELL2	0.117741458	3.804508776
SMG8	0.117697709	3.80204217
INTS12	0.117685573	3.801358126
C10orf90	0.11766807	3.800371586
RNF4	0.117464947	3.788933171
UBE2E3	0.117409455	3.785811394
CPSF4	0.117352932	3.782633076
CCDC59	0.117312147	3.780340561
SLC27A2	0.117203163	3.774218142
SETX	0.117075504	3.767053363
TASOR2	0.116956629	3.760388003
TPD52L2	0.116796559	3.751422621
TRIM52	0.116784855	3.750767564
HSF1	0.116763593	3.749577652
ADCK2	0.116749884	3.748810572
RAD21L1	0.116694031	3.745686107
TMEM254	0.11661415	3.741219879
METRNL	0.116612844	3.741146896
RPUSD1	0.116526402	3.736317026
CLRN3	0.116455195	3.732340922
BRD2	0.116396179	3.729047166
LCN6	0.116389279	3.728662201
CPSF6	0.116373702	3.727793143
ADAMTS16	0.116240328	3.720356469
FARP2	0.116123377	3.713841917
CARD14	0.11611292	3.713259727
TEX19	0.115906415	3.701772412
TLN2	0.11585226	3.698762984
TFAP2C	0.115735865	3.692299311
ZNF425	0.115616844	3.685695921
OPRL1	0.115464081	3.677229622
PRPSAP1	0.115407806	3.674113401
C16orf95	0.115402987	3.673846612
ZNF750	0.115400839	3.673727681
MFAP1	0.115388846	3.673063793
WDR83OS	0.11530433	3.668387063
NENF	0.115262324	3.666063763
BIRC6	0.115259294	3.665896214
MINPP1	0.115202384	3.662749979
TCEAL9	0.115193087	3.646786768
DBNDD1	0.115186319	3.661862048
VHL	0.115183557	3.661709427
DDX19B	0.115156212	3.660198382
BIN1	0.115003774	3.651780989
SPOPL	0.114963291	3.64954724
TMEM65	0.11476854	3.638811662
DESI1	0.114723362	3.636323646
GPR137B	0.11459977	3.629521749
PCNX2	0.1145939	3.629198867
IL9R	0.114560128	3.6120532
FN3K	0.114428461	3.620104885
XPA	0.11439136	3.618067098
APOLD1	0.11434845	3.615711047
BACE2	0.114085482	3.60128996
GALK2	0.114071211	3.600508198
IRF7	0.114034807	3.598514413
H2AC8	0.113977969	3.595402706
METRN	0.113968799	3.594900819
H3C13	0.113917751	3.59210745
CACTIN	0.113804154	3.585895591
PABPN1	0.113637166	3.576774335
CD5L	-0.113634121	3.576608101
NECTIN4	-0.113700753	3.580246139
PRSS42P	-0.113721822	3.581396916
XRCC5	-0.114079638	3.600969836
GFI1	-0.114087853	3.601419859
CXCL2	-0.114117256	3.603030843
NDUFA10	-0.11420594	3.607892092
PSMC1	-0.114215022	3.608390083
ORC5	-0.114233734	3.609416347
SLC35G3	-0.11424479	3.610022744
FOXP1	-0.114270296	3.611421952
NTN5	-0.114325491	3.614450787
C11orf16	-0.114363658	3.616545985
RFC5	-0.114395877	3.618315171
LNX1	-0.114397397	3.618398655
CENPC	-0.114494781	3.623748945
DUPD1	-0.11472085	3.63618533
C1orf162	-0.114894504	3.64575352
KRT13	-0.114936046	3.648044376
NXNL1	-0.114962787	3.649519461
NDUFA4	-0.115063876	3.655098506
MRPL20	-0.11526011	3.665941332
PDRG1	-0.115318221	3.66915549
SLC12A5	-0.115373677	3.672224173
CARS2	-0.115435386	3.675640493
METAP1D	-0.115478542	3.678030641
NDUFS7	-0.11549166	3.678757362
ELP2	-0.115527352	3.680734918
RPS16	-0.115569625	3.683077912
CAMKK2	-0.115569942	3.683095457
LAX1	-0.115706262	3.690656314
KHDC1	-0.115782562	3.694891799
SLC44A3	-0.115959681	3.70473363
MAK16	-0.115995533	3.706727522
MTNR1B	-0.116105892	3.712868499
SCML4	-0.116163038	3.716050487
MORF4L2	-0.116281716	3.706934963
CA10	-0.116292535	3.723266489
SSB	-0.116314673	3.724500853
CEP120	-0.116399797	3.729249052
LONP2	-0.116611685	3.741082089
SLC7A8	-0.116617042	3.741381532
C1D	-0.116680325	3.744919576
GALNT6	-0.116747596	3.748682528
CXCL5	-0.116802557	3.751758359
CD200	-0.116803309	3.751800465
MS4A5	-0.116824284	3.752974702
C7	-0.116843389	3.754044375
BAX	-0.116854072	3.754642589
RCL1	-0.117101543	3.768514172
HOOK1	-0.117199977	3.774039288
PLAC8	-0.117253987	3.777072632
AATF	-0.117362198	3.783154015
MAGI3	-0.11756743	3.794701993
HIVEP3	-0.117591576	3.796061892
POLR3A	-0.117595868	3.796303616
TIMM44	-0.117614957	3.797378913
ITGAD	-0.117673695	3.800688637
MRPL32	-0.117694945	3.801886393
SYMPK	-0.117696563	3.801977602
STAT4	-0.117711935	3.802844186
EMC2	-0.117721773	3.803398847
WDR33	-0.117729357	3.803826452
CHIA	-0.117796809	3.8076307
LARS2	-0.117799953	3.807808072
ANKRD35	-0.117825258	3.809235832
MRPL23	-0.117962994	3.817012032
NEMP1	-0.118017029	3.82006497
RPS23	-0.118085211	3.823919059
UGT3A2	-0.118113947	3.825544027
KCTD6	-0.118121099	3.825948514
UQCRC2	-0.118149151	3.827535274
ZNF615	-0.118216244	3.831331701
CHRNB2	-0.118296932	3.835900041
TMPRSS11E	-0.118387574	3.841035367
C4orf17	-0.118424771	3.843143765
FAM47E	-0.11843972	3.843991313
ABCE1	-0.118446256	3.844361906
ERICH5	-0.118470741	3.845750369
TMEM61	-0.118505126	3.847700662
DMP1	-0.118635249	3.855085875
RESF1	-0.118668761	3.856989079
C1orf50	-0.118728251	3.860368838
C3orf18	-0.118741151	3.861101916
NDUFB5	-0.118764696	3.862440131
MPIG6B	-0.118854939	3.867571512
KRT18	-0.119063578	3.879448786
UBE2L6	-0.119094244	3.881196166
USP48	-0.119147459	3.884229315
CCDC106	-0.11932638	3.89443683
SAMD13	-0.119373996	3.897155673
DKKL1	-0.119374442	3.897181189
SCN10A	-0.119378334	3.897403448
CGA	-0.119380048	3.897501342
FBP2	-0.119423418	3.89997874
SLC22A11	-0.119479575	3.903187858
SRP54	-0.119566746	3.908171998
A4GNT	-0.119601203	3.910143065
GTF2E1	-0.119687439	3.915078328
FNDC5	-0.119754346	3.918909744
YARS1	-0.119821529	3.922758872
ZNF546	-0.11984773	3.924260597
TRMT10C	-0.119866609	3.925342782
GTPBP10	-0.119926554	3.928780133
ASTL	-0.11993275	3.929135525
EPS8L3	-0.120030591	3.934749604
RFC4	-0.120171246	3.942827735
MPRIP	-0.120202186	3.94460581
C2orf91	-0.120625023	3.96894878
ADCY10	-0.120656729	3.970777305
SNTN	-0.120724558	3.97469056
URB2	-0.120812086	3.979743339
SGIP1	-0.12083518	3.981077081
ZBED6	-0.120852348	3.98206869
WDR3	-0.120932893	3.986722793
CDCP2	-0.120941745	3.987234465
CCL13	-0.120949566	3.987686561
BDKRB1	-0.120995265	3.990328802
POLR1D	-0.121111687	3.997064259
MRPL58	-0.121177227	4.000858619
TAF12	-0.121349887	4.010863743
ATP5MPL	-0.121395895	4.013532
DAO	-0.121400274	4.013785994
ZNF790	-0.121415695	4.014680597
ACP5	-0.121500117	4.019579861
DAB1	-0.121589227	4.024754563
BPIFA2	-0.121620313	4.026560621
YWHAE	-0.121678363	4.029934383
OAZ3	-0.121754476	4.034360159
TMEM119	-0.121829173	4.038706115
SCN3A	-0.121967461	4.046758354
CXCL6	-0.122021012	4.049878818
TLK1	-0.122029586	4.050378541
HOXC12	-0.122039074	4.05093161
SLCO4C1	-0.122059475	4.052120868
DNAI1	-0.122147305	4.057243072
HMGN5	-0.122154538	4.040385715
EXOSC9	-0.122314972	4.067030801
COX6B1	-0.122341107	4.068557544
ARL2	-0.12245277	4.07508419
CFAP221	-0.12267542	4.088114502
DNAJB13	-0.122944228	4.103875462
MED4	-0.12294958	4.104189599
MUCL1	-0.123027538	4.108766657
RDH12	-0.123237879	4.121129676
TDRD10	-0.123320967	4.126018687
RTN4IP1	-0.12333776	4.127007193
ARTN	-0.12342748	4.132290596
ELN	-0.123520546	4.137774742
RPP38	-0.123599815	4.142448915
CTH	-0.123672618	4.146744306
ATAD5	-0.123720775	4.149586845
GHRHR	-0.123760766	4.151948211
MRPL2	-0.123792688	4.153833588
TTF1	-0.123952977	4.163307508
OGDHL	-0.123954475	4.163396063
NDUFV1	-0.124001746	4.166192232
OCM	-0.124053285	4.169242027
ACP7	-0.124152996	4.175145631
CXCL9	-0.124244362	4.180559101
UBE2L3	-0.124362313	4.187553187
SLC25A44	-0.124396845	4.189601995
MRPS17	-0.12440351	4.189997478
MRPL45	-0.124437263	4.192000672
SH2D3C	-0.124494366	4.195390828
ACPP	-0.124526515	4.197300138
GFM1	-0.12452991	4.197501772
C19orf12	-0.124577575	4.200333438
DDX54	-0.124655215	4.204948097
CYP8B1	-0.124678888	4.206355633
ZBED9	-0.124679448	4.206388916
ZNHIT6	-0.124723942	4.209035154
MED20	-0.124951777	4.222599222
WDR12	-0.124964582	4.223362252
TOP1	-0.124975894	4.224036388
RAB41	-0.125014821	4.208293882
RWDD4	-0.125155199	4.234729404
CAPZA1	-0.125308199	4.243865044
ZMYND12	-0.125337719	4.245628847
MSMP	-0.125348948	4.246299886
ZNF341	-0.125505176	4.255641887
TMA16	-0.125581398	4.260203639
SULT1E1	-0.125665593	4.265245657
RSL1D1	-0.125681056	4.266171979
RFTN2	-0.125701648	4.267405751
AGO4	-0.125825307	4.27481873
MAP1LC3B2	-0.125922664	4.280659797
ZCCHC17	-0.126017664	4.286363516
SKIV2L	-0.126116568	4.292305882
CADM4	-0.126144658	4.293994425
FCRL4	-0.126381304	4.308233319
ZNF493	-0.12639755	4.309211791
OPRPN	-0.126484355	4.314441713
VENTX	-0.126544339	4.318057647
ORC2	-0.126650742	4.324475743
C2orf66	-0.126786192	4.332653264
RGS7BP	-0.12680456	4.333762835
SKP1	-0.126867102	4.337541995
GTF2F1	-0.126895023	4.339229685
BOLA3	-0.127114081	4.352482844
NDUFB3	-0.127142443	4.354200346
ZWINT	-0.127350358	4.366801825
CCDC58	-0.127390366	4.369228864
SERPINC1	-0.127602095	4.382085113
MARCO	-0.127695332	4.387752891
FIS1	-0.127841102	4.396621822
GATB	-0.128014937	4.407210668
GAPDH	-0.128126444	4.414010072
BTF3	-0.128160396	4.416081462
HIKESHI	-0.128173946	4.416908303
PROKR1	-0.128198182	4.418387385
CCL17	-0.128365084	4.428580366
THNSL2	-0.128383117	4.42968243
TRMT6	-0.12846878	4.434919497
PREB	-0.128474632	4.435277424
MS4A3	-0.128529607	4.438640253
LSM10	-0.128611747	4.443667259
BRPF3	-0.128665321	4.446947715
NARS2	-0.128676523	4.447633741
LRFN1	-0.128697695	4.448930617
CSN1S1	-0.128876218	4.45987368
ENAM	-0.129030556	4.469345699
ELAVL1	-0.129037983	4.469801783
PLAAT3	-0.129077948	4.472256445
TCEA3	-0.129129297	4.475411265
SAMD9	-0.129240861	4.482269754
KCNA10	-0.12926404	4.483695421
TMCO2	-0.129471099	4.496441532
NARS1	-0.129601405	4.50447269
SYCN	-0.129701029	4.510618002
SUOX	-0.129776094	4.515251268
PIFO	-0.129824068	4.518213787
PSG8	-0.13014212	4.537880039
RHOC	-0.130188147	4.540729829
SPATA46	-0.130445685	4.556692875
GTF2H3	-0.130445765	4.556697853
RFC1	-0.13047037	4.558224495
MRPS36	-0.130642552	4.568915423
GSTM5	-0.130652339	4.569523472
CCDC93	-0.130674359	4.570891823
RTF2	-0.130771072	4.576904028
ZAP70	-0.130817505	4.579791988
CENPJ	-0.130871029	4.583122279
KRT79	-0.131022531	4.592555667
ZNF285	-0.131223383	4.605077819
EFCAB1	-0.131270691	4.608029881
PSMA1	-0.131506718	4.622773146
UNC45B	-0.131554012	4.625730362
OCM2	-0.131727894	4.636611493
ASS1	-0.131855356	4.644596458
EPHA8	-0.131986791	4.652837905
KANK4	-0.132109195	4.660520082
PPAN	-0.1323432	4.675225118
NDUFA9	-0.132407196	4.679250953
UBE2J1	-0.132434098	4.680943869
EPSTI1	-0.13259506	4.691079779
BNIP1	-0.132648497	4.694447284
MFSD2A	-0.132663734	4.695407742
FOXA3	-0.13270659	4.698109722
PES1	-0.13286785	4.708284104
EIF2B2	-0.132871964	4.70854384
DIRAS3	-0.132894601	4.709973058
PMEL	-0.132914738	4.711244605
KRT23	-0.132937071	4.712655093
CD101	-0.133181186	4.728086949
SOCS5	-0.133445485	4.744825035
SNTA1	-0.133567745	4.752578414
ATP5PB	-0.133700792	4.761023553
CALN1	-0.133836915	4.769672159
FAAH	-0.133853069	4.770699059
INKA2	-0.133918264	4.774844698
CDK9	-0.133954448	4.777146398
CGAS	-0.134000825	4.780097325
KRT78	-0.134089408	4.78573651
C1orf216	-0.134131984	4.788448176
CAMP	-0.134186361	4.791912615
RCOR2	-0.134441411	4.808179919
LIN52	-0.134541264	4.814556631
CPQ	-0.134599338	4.818267421
CSF1	-0.134671834	4.822901769
ENPP4	-0.134695144	4.824392407
HNRNPA3	-0.134995551	4.843624727
MIS12	-0.1350233	4.845403248
C1orf61	-0.135038359	4.846368628
APOF	-0.135245951	4.859686614
CHMP3	-0.135279256	4.861825096
EXOC1	-0.135306162	4.863553083
ACTR5	-0.135366531	4.86743134
NRDC	-0.135517449	4.877133898
PTGFR	-0.135598144	4.882325987
PPM1K	-0.135621577	4.883834305
AIDA	-0.135715248	4.889866022
ZNF641	-0.135892415	4.901285079
COL9A1	-0.136127242	4.916442403
SLC22A17	-0.136254465	4.924664608
ECM1	-0.136309529	4.928225587
TFB1M	-0.13635984	4.931480392
CENPN	-0.136405813	4.93445554
COA3	-0.13653616	4.942896166
MED21	-0.136545717	4.943515369
DLL3	-0.136690153	4.95287792
ABCA4	-0.136816325	4.961064366
CPM	-0.136915858	4.9675274
MAPK1IP1L	-0.137125187	4.981134587
PPA1	-0.137154034	4.983011315
RAP1B	-0.137617702	5.013228256
ARL9	-0.137730683	5.020605848
LYRM4	-0.138022687	5.039700496
CLEC17A	-0.138101979	5.044892188
TPRKB	-0.138116135	5.045819333
CALCRL	-0.138508292	5.071540518
RGL1	-0.138846602	5.093785964
APOA2	-0.138892725	5.096822758
NGF	-0.138967428	5.101743363
ALG11	-0.139010686	5.104593932
TMTC1	-0.139259822	5.121027491
AIM2	-0.139340153	5.126332334
GBP7	-0.139343853	5.126576707
SMAP1	-0.13969931	5.150085801
SYPL2	-0.139723178	5.151666444
RNF180	-0.139799796	5.156742117
LDLRAD2	-0.140103116	5.176862208
SMC6	-0.140217629	5.184469083
RNASE12	-0.140705334	5.216933058
VWA3B	-0.14100195	5.236730104
ZNF366	-0.141058464	5.240506548
IGSF3	-0.141430906	5.265430755
KRT1	-0.141729598	5.285465135
RIMS3	-0.141954105	5.300550408
CGN	-0.142134141	5.312664142
SLC25A2	-0.142495168	5.337000313
SDAD1	-0.142508534	5.337902433
SLC22A15	-0.142593458	5.343636173
FABP1	-0.142609892	5.344746099
CCL7	-0.142633142	5.346316634
CFAP299	-0.142716391	5.351941964
SEMA6C	-0.1427481	5.354085423
SLC31A1	-0.143009859	5.371797477
TRUB2	-0.143012827	5.371998517
SLC45A1	-0.143409604	5.398906816
CENPL	-0.143478458	5.403583567
SYT9	-0.14349792	5.404905892
ETFBKMT	-0.143530654	5.407130347
MRPL15	-0.143610006	5.412524807
YIF1B	-0.143764068	5.423006268
SAMD7	-0.143776486	5.423851614
PTCD1	-0.144113714	5.446834405
RRP12	-0.14435389	5.463234608
C8A	-0.144406499	5.466830457
WDR55	-0.144784296	5.492690415
AURKB	-0.145002004	5.507622001
MOGS	-0.145545512	5.544993378
LARS1	-0.145552973	5.545507337
KRT16	-0.145596938	5.548536415
EIF1AD	-0.14574488	5.558735737
CNGA3	-0.146082561	5.582053432
PLAAT4	-0.146333675	5.599427281
GSTM2	-0.14633844	5.599757257
HMGB4	-0.146499177	5.610893747
DNAJB8	-0.146557852	5.614961896
GPBP1L1	-0.146786024	5.630796951
IL37	-0.146805814	5.632171544
CD86	-0.147265195	5.664129027
TRAPPC3	-0.147497654	5.680337278
AMBN	-0.147561446	5.684789556
TXNDC9	-0.147678954	5.692995697
GJA10	-0.148062793	5.719845084
TARS1	-0.148166276	5.727095313
SPOUT1	-0.148186674	5.728525039
UTP6	-0.148793276	5.771129146
BSDC1	-0.148817727	5.772850025
HLA-DMB	-0.149204253	5.800089857
TMEM8B	-0.149291955	5.806280116
SLC6A4	-0.1492934	5.806382092
PDE6H	-0.149299138	5.806787268
ATXN7L2	-0.149451007	5.817515437
KIAA0319L	-0.149458294	5.818030434
EXOSC5	-0.149625278	5.829839131
EIF3I	-0.149679641	5.833686361
FUT9	-0.150067481	5.861172732
MCOLN3	-0.150142803	5.866518832
ITPRIPL1	-0.150246993	5.873918224
UBTF	-0.150331253	5.879905891
DDX43	-0.150517552	5.893156238
TRAPPC11	-0.150763162	5.910649392
STATH	-0.151712067	5.978494959
VN1R4	-0.151776998	5.983152663
LSM6	-0.152137817	6.009070566
NCOA2	-0.152261584	6.017974724
LRRC8B	-0.152288316	6.0198988
DNASE2B	-0.152328959	6.022824766
ITGA7	-0.152427651	6.029933132
SYT7	-0.152711154	6.050377457
NGDN	-0.152714555	6.050622979
ZNF559	-0.152716134	6.050736909
TIMM9	-0.153574996	6.112901032
LEP	-0.153707202	6.122500368
UTP15	-0.15382975	6.131405616
CHCHD4	-0.153838884	6.13206961
DDX20	-0.154148081	6.154570477
GFM2	-0.154250557	6.162037587
MOB4	-0.154446796	6.176350472
ZNF577	-0.154627238	6.189526965
CFAP206	-0.155060111	6.221198357
SPINT4	-0.155088675	6.223291297
PRR9	-0.155207157	6.231976751
NSUN4	-0.155529298	6.255624639
SMC1A	-0.156051653	6.266313002
PRR27	-0.156177016	6.303318388
SYT4	-0.156253045	6.308929376
ITGA5	-0.156623002	6.336271004
SHISA5	-0.156750291	6.345692976
MARVELD2	-0.157093074	6.371103298
COL19A1	-0.157303611	6.386737303
ATP5F1A	-0.157383271	6.39265812
LCE2A	-0.157403768	6.394181992
CDV3	-0.157859599	6.428122947
DTX3	-0.158325234	6.462893582
CHST1	-0.158419954	6.46997903
MRPS33	-0.158605664	6.483883034
KLF17	-0.158623808	6.485242295
BAK1	-0.159125485	6.522887067
CD80	-0.159191142	6.527822487
SLC22A25	-0.159595494	6.558261896
ELAVL4	-0.159711853	6.567035474
EFCAB5	-0.159738425	6.569039919
EXOC5	-0.160147818	6.59996373
ATP5PD	-0.160308059	6.612088949
NDUFV2	-0.160931597	6.659385246
DCTN1	-0.1612999	6.687406871
DDX10	-0.161757013	6.722273526
ORC3	-0.161924682	6.735087143
ISY1	-0.162564957	6.784139183
ARID3A	-0.162637161	6.78968277
IKZF4	-0.16277327	6.800139581
RIPK3	-0.163122546	6.827012823
MRPS18C	-0.163253633	6.837113376
WARS2	-0.163367352	6.845882213
ANAPC10	-0.164424496	6.927688349
FKBP8	-0.164690984	6.948392983
IMP4	-0.165336604	6.998692207
PSMA2	-0.165543328	7.014839146
SMR3B	-0.165632836	7.021836733
TMPRSS12	-0.165832859	7.037487808
PDCL3	-0.166134679	7.061139625
H1-7	-0.166709647	7.106315035
GJA1	-0.167021528	7.130884747
CSAD	-0.167573167	7.174454425
SLC4A8	-0.168517051	7.249337003
MAPK10	-0.169322464	7.313566302
RFPL4B	-0.169640149	7.338984917
BCAT2	-0.170137414	7.378867936
C3orf84	-0.170553496	7.412329406
LCE1B	-0.170597883	7.415903847
GLYATL2	-0.17060505	7.416481101
UFC1	-0.170614435	7.417237026
COX14	-0.170626527	7.418211045
PFKM	-0.171043889	7.451872131
MTIF3	-0.171437472	7.483691013
FGF21	-0.171733286	7.507654043
ZNF236	-0.172150909	7.541555083
KCNJ10	-0.172891143	7.601847557
PDCL2	-0.175259043	7.796461485
DAP3	-0.176059752	7.862873752
RARRES2	-0.176734562	7.919080885
RCC1	-0.177092643	7.948994846
IQCB1	-0.17731094	7.967261285
BYSL	-0.177930011	8.019186977
CD53	-0.178094249	8.032993528
MED27	-0.180705685	8.254254222
PRELP	-0.182599882	8.41679008
MRPL30	-0.182660367	8.422008481
COQ3	-0.184028951	8.540555645
OOEP	-0.184291956	8.563440432
GBP6	-0.184458553	8.577953755
POLR1B	-0.185590374	8.676908122
RARS1	-0.185728487	8.689025562
ZNF362	-0.186325252	8.74148904
MRPL3	-0.186367908	8.74524563
MEI4	-0.187270196	8.824913855
TTK	-0.188085186	8.897212424
FDCSP	-0.190788576	9.139338024
UGT2B7	-0.191867477	9.236959316
MYOZ2	-0.193138716	9.352710896
FBXL4	-0.19400264	9.431824467
RPF2	-0.194943485	9.518396582
NAT10	-0.195182213	9.540432032
CRP	-0.196654017	9.676900517
GGPS1	-0.197152263	9.723339229
ASNS	-0.197873212	9.790750405
UTP14A	-0.206457027	10.5647265
SLC35G6	-0.209227373	10.88622067
