# Supplementary material for: Metabolic reprogramming of cancer cells by JMJD6-mediated pre-mRNA splicing associated with therapeutic response to splicing inhibitor
Source: eLife. 2024 Mar 15;12:RP90993. doi: 10.7554/eLife.90993 (PMC10942784; doi:10.7554/eLife.90993)
Supplement: Source data 1. [file elife-90993-data1.zip › Figure 3H-source data.xlsx]

## Sheet: BE2C_siRNA1
junc	logFC	AveExpr	t	P.Value	adj.P.Val	B	Gene	Annotation_Set	RefGene	EnsGene	AceView	UCSC	Gene.log2FC	diff.log2FC
7:100808144:+,7:100808655:+	1.91358	5.96219	25.5031	1.25344e-29	7.85312e-26	57.135	VGF	core	NM_003378	ENST00000249330,ENST00000448792	VGF.aAug10	uc003uxx.3	1.91424	-0.000660751
2:224464014:+,2:224467003:+	1.13683	7.27373	23.7584	2.97555e-28	1.5699e-24	54.2552	SCG2	core	NM_003469	ENST00000305409	SCG2.aAug10	uc002vnm.2	1.13689	-6.14568e-05
11:65623201:+,11:65623406:+	1.0621	7.55325	23.3618	6.28342e-28	2.99941e-24	53.5095	CFL1	core	NM_005507	ENST00000308162,ENST00000524553,ENST00000525451,ENST00000527344,ENST00000530413,ENST00000531407,ENST00000531413,ENST00000532134,ENST00000534769	CFL1.aAug10,CFL1.bAug10,CFL1.cAug10,CFL1.dAug10,CFL1.eAug10,CFL1.fAug10,CFL1.gAug10,CFL1.hAug10	uc001ofs.2,uc001oft.2	1.06123	0.000864425
11:65622919:+,11:65623125:+	1.10789	7.16616	22.3173	4.74051e-27	1.90083e-23	51.492	CFL1	core	NM_005507	ENST00000308162,ENST00000524553,ENST00000525451,ENST00000527344,ENST00000530413,ENST00000531407,ENST00000531413,ENST00000532134,ENST00000534769	CFL1.aAug10,CFL1.bAug10,CFL1.cAug10,CFL1.dAug10,CFL1.eAug10,CFL1.fAug10,CFL1.gAug10,CFL1.hAug10,CFL1.kAug10	uc001ofs.2,uc001oft.2	1.06123	0.0466538
X:12994480:+,X:12994896:+	1.41808	5.7631	20.3297	2.77765e-25	6.0531e-22	47.3544	TMSB4X,TMSL3	core	NM_021109	ENST00000380633,ENST00000380635,ENST00000380636,ENST00000451311	TMSB4X.aAug10,TMSB4X.cAug10,TMSB4X.dAug10	uc004cvf.2	1.42896	-0.0108745
1:192780277:+,1:192780532:+	1.95688	3.51244	20.1385	4.17768e-25	8.54668e-22	46.5138	RGS2	core	NM_002923	ENST00000235382	RGS2.aAug10,RGS2.bAug10	uc001gsl.2	1.96755	-0.0106734
1:182569648:+,1:182571101:+	1.332	5.60739	19.4758	1.76158e-24	3.09804e-21	45.5468	RGS16	core	NM_002928	ENST00000367558	RGS16.aAug10,RGS16.bAug10,RGS16.eAug10,RGS16.hAug10	uc001gpl.3	1.27436	0.057642
11:65623713:+,11:65625568:+	1.01334	6.96524	19.1474	3.64567e-24	6.09095e-21	44.8813	CFL1	core	NM_005507	ENST00000308162,ENST00000525451,ENST00000526975,ENST00000530945	CFL1.eAug10,CFL1.iAug10	uc001ofs.2,uc001oft.2,uc001ofu.2	1.06123	-0.0478928
1:192779397:+,1:192779500:+	1.96756	3.18742	18.6842	1.03419e-23	1.54733e-20	43.2456	RGS2	core	NM_002923	ENST00000235382,ENST00000487236	RGS2.bAug10,RGS2.cAug10,RGS2.dAug10,RGS2.fAug10	uc001gsl.2	1.96755	6.68722e-06
3:183900036:+,3:183900545:+	1.16575	5.82804	18.2532	2.77726e-23	3.76222e-20	42.845	AP2M1	core	NM_001025205,NM_004068	ENST00000292807,ENST00000382456,ENST00000411763,ENST00000439647,ENST00000442686,ENST00000461733,ENST00000539646,ENST00000540821	AP2M1.aAug10,AP2M1.bAug10,AP2M1.cAug10,AP2M1.dAug10,AP2M1.eAug10,AP2M1.gAug10,AP2M1.hAug10,AP2M1.iAug10,AP2M1.jAug10	uc003fmw.2,uc003fmx.2,uc003fmy.2,uc011bqx.1,uc011bqy.1,uc011bqz.1	1.18435	-0.0186045
X:12993287:+,X:12994365:+	1.43965	5.03932	18.2472	2.81604e-23	3.76388e-20	42.7155	TMSB4X,TMSL3	core	NM_021109	ENST00000451311	TMSB4X.dAug10	uc004cvf.2	1.42896	0.0106894
1:192778311:+,1:192779296:+	1.96762	2.9921	18.1893	3.21991e-23	4.1919e-20	42.083	RGS2	core	NM_002923	ENST00000235382,ENST00000464302,ENST00000483295	RGS2.aAug10,RGS2.bAug10,RGS2.cAug10,RGS2.eAug10,RGS2.fAug10,RGS2.hAug10	uc001gsl.2	1.96755	6.76515e-05
3:183898039:+,3:183898630:+	1.19063	5.83465	18.1358	3.64555e-23	4.68519e-20	42.5769	AP2M1	core	NM_004068	None	None	uc011bqx.1	1.18435	0.00627372
1:155838582:+,1:155850291:+	1.90324	4.17781	18.0593	4.35651e-23	5.32578e-20	41.8502	SYT11	core	NM_152280	ENST00000368324	SYT11.aAug10,SYT11.dAug10	uc001fmg.2	1.75828	0.144954
3:183898632:+,3:183898634:+	1.19645	5.77611	17.79	8.19046e-23	9.33006e-20	41.774	AP2M1	core	NM_004068	None	None	None	1.18435	0.0121034
1:155850414:+,1:155850989:+	1.93193	4.18785	17.7044	1.00246e-22	1.1291e-19	41.0664	SYT11	core	NM_152280	ENST00000368324,ENST00000539162	SYT11.aAug10,SYT11.bAug10	uc001fmg.2,uc010pgq.1	1.75828	0.173647
3:183899835:+,3:183899939:+	1.14992	5.70153	17.6614	1.10989e-22	1.23622e-19	41.4686	AP2M1	core	NM_001025205,NM_004068	ENST00000292807,ENST00000382456,ENST00000411763,ENST00000439647,ENST00000442686,ENST00000461733,ENST00000463935,ENST00000480260,ENST00000539646,ENST00000540821	AP2M1.aAug10,AP2M1.bAug10,AP2M1.cAug10,AP2M1.dAug10,AP2M1.eAug10,AP2M1.gAug10,AP2M1.hAug10,AP2M1.iAug10,AP2M1.jAug10,AP2M1.nAug10,AP2M1.oAug10,AP2M1.pAug10	uc003fmw.2,uc003fmx.2,uc003fmy.2,uc011bqx.1,uc011bqy.1,uc011bqz.1	1.18435	-0.0344352
1:182572474:+,1:182573351:+	1.22755	5.44484	17.5017	1.62266e-22	1.69439e-19	41.0845	RGS16	core	NM_002928	ENST00000367558	RGS16.aAug10,RGS16.cAug10,RGS16.dAug10,RGS16.eAug10,RGS16.fAug10,RGS16.jAug10	uc001gpl.3,uc010pnv.1	1.27436	-0.046802
1:182571619:+,1:182572364:+	1.26874	5.22543	17.4909	1.66496e-22	1.72065e-19	41.038	RGS16	core	NM_002928	ENST00000367558	RGS16.aAug10,RGS16.cAug10,RGS16.fAug10	uc001gpl.3,uc010pnv.1	1.27436	-0.0056187
1:192779561:+,1:192780111:+	1.9759	2.88422	17.4565	1.8078e-22	1.82917e-19	40.3701	RGS2	core	NM_002923	ENST00000235382,ENST00000464302,ENST00000487236	RGS2.aAug10,RGS2.bAug10,RGS2.dAug10,RGS2.fAug10,RGS2.hAug10	uc001gsl.2	1.96755	0.00834853
16:55725964:+,16:55727922:+	1.6821	3.80903	17.4132	2.00477e-22	1.97026e-19	40.5721	SLC6A2	core	NM_001043,NM_001172501,NM_001172502,NM_001172504	ENST00000219833,ENST00000379906,ENST00000414754	SLC6A2.aAug10,SLC6A2.bAug10,SLC6A2.cAug10	uc002eif.2,uc002eig.2,uc002eih.2,uc002eii.2,uc010ccd.2	1.48384	0.198264
3:183896910:+,3:183897957:+	1.16888	5.61434	17.2898	2.6962e-22	2.57407e-19	40.5876	AP2M1	core	NM_001025205,NM_004068	ENST00000292807,ENST00000382456,ENST00000411763,ENST00000431779,ENST00000432591,ENST00000439647,ENST00000448139,ENST00000472560,ENST00000487958,ENST00000539646,ENST00000540821	AP2M1.aAug10,AP2M1.bAug10,AP2M1.cAug10,AP2M1.dAug10,AP2M1.eAug10,AP2M1.fAug10,AP2M1.iAug10,AP2M1.kAug10,AP2M1.pAug10	uc003fmw.2,uc003fmx.2,uc003fmy.2,uc011bqx.1	1.18435	-0.0154764
1:182571267:+,1:182571555:+	1.26653	5.2952	17.1665	3.63124e-22	3.30918e-19	40.276	RGS16	core	NM_002928	ENST00000367558	RGS16.aAug10,RGS16.bAug10,RGS16.cAug10,RGS16.dAug10,RGS16.eAug10	uc001gpl.3,uc010pnv.1	1.27436	-0.0078206
16:55706087:+,16:55719055:+	1.57174	4.00221	16.9694	5.86126e-22	4.97929e-19	39.6375	SLC6A2	core	NM_001043,NM_001172501,NM_001172502,NM_001172504	ENST00000219833,ENST00000379906,ENST00000414754,ENST00000537705	tatema.aAug10,tatema.dAug10	uc002eif.2,uc002eig.2,uc002eih.2,uc002eii.2,uc010ccd.2	1.48384	0.0878986
3:183900656:+,3:183901270:+	1.08624	5.74577	16.8611	7.63871e-22	6.43474e-19	39.5651	AP2M1	core	NM_001025205,NM_004068	ENST00000292807,ENST00000382456,ENST00000411763,ENST00000439647,ENST00000461733,ENST00000539646,ENST00000540821	AP2M1.aAug10,AP2M1.bAug10,AP2M1.cAug10,AP2M1.eAug10,AP2M1.hAug10,AP2M1.iAug10	uc003fmw.2,uc003fmx.2,uc003fmy.2,uc011bqx.1,uc011bqy.1	1.18435	-0.0981073
3:183899603:+,3:183899700:+	1.20797	5.38207	16.6862	1.17476e-21	9.57424e-19	39.1202	AP2M1	core	NM_001025205,NM_004068	ENST00000292807,ENST00000382456,ENST00000411763,ENST00000432591,ENST00000439647,ENST00000461733,ENST00000463935,ENST00000476434,ENST00000539646,ENST00000540821	AP2M1.aAug10,AP2M1.bAug10,AP2M1.cAug10,AP2M1.dAug10,AP2M1.eAug10,AP2M1.fAug10,AP2M1.gAug10,AP2M1.hAug10,AP2M1.jAug10,AP2M1.nAug10,AP2M1.oAug10	uc003fmw.2,uc003fmx.2,uc003fmy.2,uc011bqx.1,uc011bqy.1,uc011bqz.1	1.18435	0.0236161
7:24329198:+,7:24331282:+	2.12224	3.30164	16.4408	2.16017e-21	1.66572e-18	37.8646	NPY	core	NM_000905	ENST00000242152,ENST00000405982,ENST00000407573	NPY.aAug10,NPY.bAug10,NPY.cAug10	uc003sww.1	1.98824	0.133999
3:183892747:+,3:183894739:+	1.27277	5.02237	16.376	2.54011e-21	1.86517e-18	38.3287	AP2M1	core	NM_001025205,NM_004068	ENST00000292807,ENST00000382456,ENST00000411763,ENST00000427072,ENST00000448139,ENST00000460862,ENST00000466598,ENST00000484469,ENST00000487958,ENST00000539646,ENST00000540821	AP2M1.aAug10,AP2M1.cAug10,AP2M1.eAug10,AP2M1.fAug10,AP2M1.gAug10,AP2M1.jAug10,AP2M1.lAug10,AP2M1.mAug10,AP2M1.pAug10,AP2M1.qAug10	uc003fmw.2,uc003fmx.2,uc011bqx.1	1.18435	0.0884153
3:183898772:+,3:183898873:+	1.17106	5.32808	16.3647	2.61342e-21	1.89841e-18	38.3272	AP2M1	core	NM_001025205,NM_004068	ENST00000292807,ENST00000382456,ENST00000411763,ENST00000439647,ENST00000461733,ENST00000468048,ENST00000490151,ENST00000539646,ENST00000540821	AP2M1.aAug10,AP2M1.bAug10,AP2M1.cAug10,AP2M1.dAug10,AP2M1.fAug10,AP2M1.gAug10,AP2M1.hAug10,AP2M1.iAug10,AP2M1.jAug10,AP2M1.pAug10	uc003fmw.2,uc003fmy.2,uc011bqx.1,uc011bqy.1,uc011bqz.1	1.18435	-0.0132944
16:55703608:+,16:55705850:+	1.57589	3.84623	16.3318	2.83799e-21	2.03208e-18	38.0722	SLC6A2	core	NM_001043,NM_001172501,NM_001172504	ENST00000219833,ENST00000379906,ENST00000414754,ENST00000537705	tatema.aAug10,tatema.bAug10,tatema.cAug10	uc002eif.2,uc002eig.2,uc002eih.2,uc010ccd.2	1.48384	0.0920517
3:183899014:+,3:183899484:+	1.11809	5.54723	16.2232	3.72821e-21	2.59535e-18	37.991	AP2M1	core	NM_001025205,NM_004068	ENST00000292807,ENST00000382456,ENST00000411763,ENST00000432591,ENST00000439647,ENST00000461733,ENST00000476434,ENST00000490151,ENST00000539646,ENST00000540821	AP2M1.aAug10,AP2M1.bAug10,AP2M1.cAug10,AP2M1.dAug10,AP2M1.eAug10,AP2M1.fAug10,AP2M1.gAug10,AP2M1.hAug10,AP2M1.nAug10	uc003fmw.2,uc003fmx.2,uc003fmy.2,uc011bqx.1,uc011bqy.1,uc011bqz.1	1.18435	-0.0662578
16:55690880:+,16:55703477:+	1.49016	3.87915	16.0204	6.22843e-21	4.24737e-18	37.3335	SLC6A2	core	NM_001043,NM_001172501,NM_001172504	ENST00000219833,ENST00000379906,ENST00000414754,ENST00000537705	tatema.aAug10,tatema.bAug10,tatema.cAug10	uc002eif.2,uc002eig.2,uc002eih.2,uc010ccd.2	1.48384	0.00632026
17:38153633:+,17:38153757:+	1.07921	5.49933	15.9002	8.45898e-21	5.65308e-18	37.1817	PSMD3	core	NM_002809	ENST00000264639,ENST00000415039,ENST00000540504,ENST00000541736	PSMD3.aAug10,PSMD3.cAug10,PSMD3.dAug10,PSMD3.eAug10,PSMD3.hAug10	uc002htn.1,uc010wen.1,uc010weo.1	1.06609	0.0131191
16:55731937:+,16:55732381:+	1.41165	4.03032	15.8915	8.64947e-21	5.7421e-18	37.0602	SLC6A2	core	NM_001043,NM_001172501,NM_001172502,NM_001172504	ENST00000219833,ENST00000379906,ENST00000414754,ENST00000537705	SLC6A2.aAug10,SLC6A2.bAug10,SLC6A2.cAug10,SLC6A2.dAug10,SLC6A2.eAug10	uc002eif.2,uc002eig.2,uc002eih.2,uc002eii.2,uc002eij.2,uc010ccd.2	1.48384	-0.0721914
16:55734218:+,16:55735775:+	1.43897	3.83127	15.8386	9.90404e-21	6.48902e-18	36.8737	SLC6A2	core	NM_001043,NM_001172501,NM_001172502,NM_001172504	ENST00000219833,ENST00000379906,ENST00000414754,ENST00000537705	SLC6A2.aAug10,SLC6A2.bAug10,SLC6A2.dAug10	uc002eif.2,uc002eig.2,uc002eih.2,uc002eii.2,uc002eij.2	1.48384	-0.0448651
14:55310861:+,14:55312486:+	1.49051	3.99072	15.7826	1.1434e-20	7.44277e-18	36.7216	GCH1	core	NM_000161,NM_001024024	ENST00000254299,ENST00000395514,ENST00000491895	GCH1.aAug10,GCH1.bAug10	uc001xbh.1,uc001xbi.1	1.57802	-0.0875137
2:47399598:+,2:47403580:+	1.13519	4.91357	15.7737	1.16966e-20	7.5646e-18	36.8514	CALM2	extended	None	ENST00000456319	CALM2andC2orf61.mAug10	None	0.19147	0.943716
3:183894855:+,3:183896645:+	1.1178	5.37724	15.5584	2.03888e-20	1.27741e-17	36.3067	AP2M1	core	NM_001025205,NM_004068	ENST00000292807,ENST00000382456,ENST00000431779,ENST00000432591,ENST00000439647,ENST00000455925,ENST00000460862,ENST00000466598,ENST00000472560,ENST00000487958,ENST00000539646,ENST00000540821	AP2M1.bAug10,AP2M1.cAug10,AP2M1.dAug10,AP2M1.eAug10,AP2M1.fAug10,AP2M1.iAug10,AP2M1.jAug10,AP2M1.kAug10,AP2M1.lAug10,AP2M1.mAug10,AP2M1.pAug10	uc003fmw.2,uc003fmx.2,uc003fmy.2,uc011bqx.1	1.18435	-0.0665488
16:55729314:+,16:55730137:+	1.3537	4.02335	15.5099	2.31211e-20	1.43071e-17	36.0952	SLC6A2	core	NM_001043,NM_001172501,NM_001172502,NM_001172504	ENST00000219833,ENST00000379906,ENST00000414754,ENST00000537705	SLC6A2.aAug10,SLC6A2.bAug10,SLC6A2.cAug10,SLC6A2.dAug10	uc002eif.2,uc002eig.2,uc002eih.2,uc002eii.2,uc002eij.2,uc010ccd.2	1.48384	-0.130143
16:55732480:+,16:55733466:+	1.34995	4.10071	15.3229	3.76608e-20	2.23389e-17	35.6334	SLC6A2	core	NM_001043,NM_001172501,NM_001172502,NM_001172504	ENST00000219833,ENST00000379906,ENST00000414754,ENST00000537705	SLC6A2.aAug10,SLC6A2.bAug10,SLC6A2.cAug10,SLC6A2.dAug10,SLC6A2.eAug10	uc002eif.2,uc002eig.2,uc002eih.2,uc002eii.2,uc002eij.2,uc010ccd.2	1.48384	-0.133888
2:47397903:+,2:47399553:+	1.07986	5.09169	15.2623	4.41422e-20	2.58771e-17	35.5438	CALM2	extended	None	ENST00000456319,ENST00000484408,ENST00000489742	CALM2andC2orf61.mAug10,CALM2andC2orf61.oAug10,CALM2andC2orf61.vaAug10	None	0.19147	0.88839
7:24325047:+,7:24329118:+	2.14642	2.87573	15.0053	8.70337e-20	4.92915e-17	34.0909	NPY	core	NM_000905	ENST00000242152,ENST00000405982,ENST00000407573	NPY.aAug10,NPY.bAug10,NPY.cAug10	uc003sww.1	1.98824	0.158178
13:37567809:+,13:37569126:+	1.27126	4.50469	14.8923	1.17569e-19	6.48849e-17	34.5173	ALG5	core	NM_013338	ENST00000239891,ENST00000413537	ALG5.aAug10,ALG5.cAug10,ALG5.eAug10,ALG5.gAug10	uc001uvy.2,uc010ter.1	1.07114	0.200114
17:38152591:+,17:38153583:+	1.01765	5.33331	14.8666	1.25942e-19	6.89885e-17	34.5051	PSMD3	core	NM_002809	ENST00000264639,ENST00000415039,ENST00000540504	PSMD3.aAug10,PSMD3.cAug10,PSMD3.dAug10,PSMD3.hAug10,PSMD3.iAug10	uc002htn.1,uc010weo.1	1.06609	-0.048438
16:55730249:+,16:55731809:+	1.50302	3.61861	14.8257	1.40475e-19	7.61176e-17	34.262	SLC6A2	core	NM_001043,NM_001172501,NM_001172502,NM_001172504	ENST00000219833,ENST00000379906,ENST00000414754,ENST00000537705	SLC6A2.aAug10,SLC6A2.bAug10,SLC6A2.cAug10,SLC6A2.dAug10	uc002eif.2,uc002eig.2,uc002eih.2,uc002eii.2,uc002eij.2,uc010ccd.2	1.48384	0.019185
16:55733566:+,16:55734051:+	1.43524	3.96784	14.8162	1.44104e-19	7.72488e-17	34.307	SLC6A2	core	NM_001043,NM_001172501,NM_001172502,NM_001172504	ENST00000219833,ENST00000379906,ENST00000414754,ENST00000537705	SLC6A2.aAug10,SLC6A2.bAug10,SLC6A2.dAug10,SLC6A2.eAug10	uc002eif.2,uc002eig.2,uc002eih.2,uc002eii.2,uc002eij.2	1.48384	-0.0486016
17:61512604:+,17:61513049:+	1.03413	4.79739	14.5897	2.65118e-19	1.37702e-16	33.7676	CYB561	core	NM_001017916,NM_001017917,NM_001915	ENST00000360793,ENST00000392975,ENST00000392976,ENST00000542042	CYB561.aAug10,CYB561.bAug10,CYB561.cAug10,CYB561.dAug10,CYB561.eAug10,CYB561.fAug10,CYB561.gAug10,CYB561.hAug10,CYB561.iAug10,CYB561.jAug10,CYB561.kAug10,CYB561.lAug10,CYB561.nAug10,CYB561.sAug10	uc002jap.2,uc002jaq.2,uc002jar.2,uc002jas.2,uc002jat.2,uc010ddt.2,uc010wpg.1	0.905772	0.128358
X:47444414:+,X:47444604:+	1.59738	3.99834	14.4872	3.50055e-19	1.79035e-16	33.2526	SYN1,TIMP1	core	NM_003254	ENST00000218388,ENST00000377017,ENST00000441738,ENST00000456754	TIMP1.aAug10,TIMP1.bAug10,TIMP1.cAug10,TIMP1.dAug10,TIMP1.eAug10,TIMP1.hAug10	uc004dif.2,uc010nht.1	1.58916	0.00822239
17:38146182:+,17:38146347:+	1.17269	4.75501	14.4533	3.83853e-19	1.95325e-16	33.3831	PSMD3	core	NM_002809	ENST00000264639,ENST00000415039,ENST00000541736	PSMD3.aAug10,PSMD3.bAug10,PSMD3.cAug10,PSMD3.dAug10,PSMD3.eAug10	uc002htn.1,uc010wen.1,uc010weo.1	1.06609	0.106605
16:55735846:+,16:55736235:+	1.39238	3.76696	14.4231	4.16729e-19	2.09922e-16	33.223	SLC6A2	core	NM_001043,NM_001172501,NM_001172502	ENST00000379906,ENST00000414754,ENST00000537705	SLC6A2.bAug10,SLC6A2.cAug10,SLC6A2.dAug10	uc002eif.2,uc002eig.2,uc002eih.2,uc002eii.2,uc002eij.2,uc010ccd.2	1.48384	-0.0914632
13:37569172:+,13:37569562:+	1.11901	4.77301	14.2912	5.97505e-19	2.95056e-16	32.9513	ALG5	core	NM_001142364,NM_013338	ENST00000239891,ENST00000413537,ENST00000443765	ALG5.aAug10,ALG5.bAug10,ALG5.cAug10,ALG5.eAug10	uc001uvy.2,uc010teq.1,uc010ter.1	1.07114	0.0478684
11:119290230:+,11:119290761:+	1.02204	5.46088	14.2525	6.64405e-19	3.24891e-16	32.856	LOC100499227,THY1	core	NM_006288	ENST00000284240,ENST00000524659,ENST00000527590,ENST00000528295,ENST00000528522,ENST00000532974	THY1.bAug10,THY1.cAug10,THY1.dAug10,THY1.eAug10,THY1.hAug10,THY1.iAug10	uc001pwq.2,uc001pwr.2,uc001pws.2	1.01147	0.0105735
13:37524194:+,13:37526651:+	1.15885	4.69818	14.2364	6.9442e-19	3.36681e-16	32.7964	ALG5	core	NM_001142364,NM_013338	ENST00000239891,ENST00000413537,ENST00000443765,ENST00000460230,ENST00000486410	ALG5.aAug10,ALG5.bAug10,ALG5.cAug10,ALG5.eAug10,ALG5.gAug10,ALG5.hAug10,ALG5.iAug10,ALG5.kAug10,ALG5.mAug10	uc001uvy.2,uc010teq.1,uc010ter.1	1.07114	0.0877103
X:47442935:+,X:47444335:+	1.51439	4.28161	14.0408	1.19127e-18	5.64325e-16	32.1533	SYN1,TIMP1	core	NM_003254	ENST00000218388,ENST00000377018,ENST00000441738,ENST00000456754	TIMP1.aAug10,TIMP1.bAug10,TIMP1.dAug10,TIMP1.eAug10,TIMP1.fAug10	uc004dif.2,uc010nht.1,uc011mlr.1	1.58916	-0.0747669
16:67116242:+,16:67132613:+	1.45201	3.49916	13.962	1.48249e-18	6.84842e-16	31.9061	CBFB	core	NM_001755	ENST00000290858	CBFB.cAug10	uc002era.2	1.27361	0.17841
13:37563713:+,13:37567741:+	1.10008	4.90674	13.89	1.81158e-18	8.25456e-16	31.8622	ALG5	core	NM_013338	ENST00000239891,ENST00000413537,ENST00000496689	ALG5.aAug10,ALG5.cAug10,ALG5.dAug10,ALG5.eAug10,ALG5.fAug10,ALG5.gAug10,ALG5.jAug10,ALG5.nAug10	uc001uvy.2,uc010ter.1	1.07114	0.0289399
17:38146450:+,17:38151207:+	1.0982	4.99998	13.7634	2.58101e-18	1.16023e-15	31.5134	PSMD3	core	NM_002809	ENST00000264639,ENST00000415039,ENST00000541736	PSMD3.aAug10,PSMD3.bAug10,PSMD3.cAug10,PSMD3.dAug10,PSMD3.eAug10,PSMD3.gAug10	uc002htn.1,uc010wen.1,uc010weo.1	1.06609	0.0321131
18:40850613:+,18:40851677:+	2.0619	2.53255	13.7123	2.97934e-18	1.30992e-15	30.5944	SYT4	core	NM_020783	ENST00000255224,ENST00000442661	SYT4.aAug10,SYT4.bAug10,SYT4.dAug10,SYT4.eAug10	uc002law.2,uc010dng.2,uc010xcm.1	2.04476	0.0171344
16:67100701:+,16:67116116:+	1.21118	4.06128	13.6718	3.33877e-18	1.44263e-15	31.228	CBFB	core	NM_001755,NM_022845	ENST00000290858,ENST00000412916	CBFB.aAug10,CBFB.cAug10,CBFB.fAug10,CBFB.kAug10	uc002era.2,uc002erb.2	1.27361	-0.0624279
16:55719193:+,16:55725830:+	1.70121	2.85889	13.5223	5.09381e-18	2.08418e-15	30.513	SLC6A2	core	NM_001043,NM_001172501,NM_001172502,NM_001172504	ENST00000219833,ENST00000379906,ENST00000414754	SLC6A2.aAug10,SLC6A2.bAug10,SLC6A2.cAug10,tatema.aAug10	uc002eif.2,uc002eig.2,uc002eih.2,uc002eii.2,uc010ccd.2	1.48384	0.217371
7:45024025:+,7:45025620:+	1.50328	3.40596	13.4727	5.86326e-18	2.36436e-15	30.5013	C7orf40	core	NR_003697	None	C7orf40andSNORA9.bAug10,C7orf40andSNORA9.dAug10,C7orf40andSNORA9.eAug10	uc003tml.3	1.20058	0.302699
17:38142965:+,17:38144936:+	1.16716	4.42527	13.4719	5.87645e-18	2.36436e-15	30.6789	PSMD3	core	NM_002809	ENST00000264639,ENST00000415039,ENST00000541736	PSMD3.aAug10,PSMD3.cAug10,PSMD3.dAug10,PSMD3.eAug10	uc002htn.1,uc010wen.1,uc010weo.1	1.06609	0.101068
17:38140737:+,17:38142828:+	1.09183	4.67139	13.3571	8.15053e-18	3.17915e-15	30.3707	PSMD3	core	NM_002809	ENST00000264639,ENST00000415039,ENST00000541736	PSMD3.aAug10,PSMD3.bAug10,PSMD3.cAug10,PSMD3.dAug10,PSMD3.eAug10	uc002htn.1,uc010wen.1,uc010weo.1	1.06609	0.0257381
8:29197760:+,8:29207363:+	1.54237	3.33862	13.3165	9.15325e-18	3.4756e-15	30.0468	DUSP4	core	NM_001394	ENST00000240100	DUSP4.aAug10	uc003xhm.2	1.36906	0.173313
14:55332154:+,14:55369039:+	1.4628	3.33362	13.2027	1.2685e-17	4.70961e-15	29.7833	GCH1	core	NM_000161,NM_001024024,NM_001024070,NM_001024071	ENST00000254299,ENST00000395514,ENST00000395521,ENST00000395524,ENST00000491895,ENST00000536224,ENST00000543643	GCH1.aAug10,GCH1.bAug10,GCH1.cAug10,GCH1.dAug10,GCH1.eAug10,GCH1.fAug10	uc001xbh.1,uc001xbi.1,uc001xbj.1,uc001xbk.1,uc001xbl.1,uc010aol.1	1.57802	-0.115225
9:33798080:+,9:33798484:+	1.07695	4.90464	13.1252	1.58531e-17	5.7703e-15	29.7167	PRSS3	core	NM_001197097,NM_001197098,NM_002771,NM_007343	ENST00000342836,ENST00000361005,ENST00000379405,ENST00000429677,ENST00000457896	PRSS3.aAug10,PRSS3.bAug10,PRSS3.cAug10,PRSS3.dAug10,PRSS3.eAug10,PRSS3.gAug10	uc003zti.3,uc003ztj.3,uc003ztl.3	1.07731	-0.000365962
6:36646575:+,6:36651874:+	4.16979	1.36409	13.0807	1.80255e-17	6.52329e-15	25.0468	CDKN1A	core	NM_000389	ENST00000244741	CDKN1A.lAug10,CDKN1A.rAug10	uc003oml.2,uc003omm.3	3.9556	0.214188
16:55728025:+,16:55729190:+	1.23445	3.84272	13.0792	1.8104e-17	6.52811e-15	29.5684	SLC6A2	core	NM_001043,NM_001172501,NM_001172502,NM_001172504	ENST00000219833,ENST00000379906,ENST00000414754,ENST00000537705	SLC6A2.aAug10,SLC6A2.bAug10,SLC6A2.cAug10,SLC6A2.dAug10,SLC6A2.eAug10	uc002eif.2,uc002eig.2,uc002eih.2,uc002eii.2,uc002eij.2,uc010ccd.2	1.48384	-0.249388
1:23885510:+,1:23885618:+	1.13498	4.19142	12.9874	2.36201e-17	8.30797e-15	29.3122	ID3	core	NM_002167	ENST00000374561,ENST00000486541	ID3.bAug10,ID3.cAug10	uc001bhh.3	1.07596	0.0590255
7:120990604:+,7:120991197:+	1.16028	4.27945	12.9626	2.53799e-17	8.86474e-15	29.2372	FAM3C	core	NM_001040020,NM_014888	ENST00000359943,ENST00000474082	FAM3C.aAug10,FAM3C.bAug10,FAM3C.cAug10,FAM3C.hAug10,FAM3C.lAug10	uc003vjx.2,uc010lkm.2	1.05921	0.101071
13:37559877:+,13:37563621:+	1.06798	4.6435	12.9123	2.93828e-17	1.01567e-14	29.1069	ALG5	core	NM_001142364,NM_013338	ENST00000239891,ENST00000413537,ENST00000443765,ENST00000496689	ALG5.aAug10,ALG5.bAug10,ALG5.cAug10,ALG5.dAug10,ALG5.eAug10,ALG5.fAug10,ALG5.gAug10,ALG5.jAug10,ALG5.nAug10	uc001uvy.2,uc010teq.1,uc010ter.1	1.07114	-0.00316768
17:38151780:+,17:38152436:+	1.00419	4.86217	12.8964	3.07724e-17	1.05642e-14	29.0622	PSMD3	core	NM_002809	ENST00000264639,ENST00000415039,ENST00000541736	PSMD3.aAug10,PSMD3.bAug10,PSMD3.cAug10,PSMD3.dAug10,PSMD3.eAug10	uc002htn.1,uc010wen.1,uc010weo.1	1.06609	-0.0618952
X:47445066:+,X:47445920:+	1.76633	3.42793	12.8552	3.4702e-17	1.17921e-14	28.6173	SYN1,TIMP1	core	NM_003254	ENST00000218388,ENST00000377017,ENST00000445623	TIMP1.aAug10,TIMP1.cAug10,TIMP1.dAug10	uc004dif.2	1.58916	0.177172
16:67070658:+,16:67100585:+	1.32616	3.51139	12.8319	3.71387e-17	1.25351e-14	28.7936	CBFB	core	NM_001755,NM_022845	ENST00000290858,ENST00000412916	CBFB.aAug10,CBFB.bAug10,CBFB.cAug10,CBFB.dAug10,CBFB.eAug10,CBFB.jAug10,CBFB.kAug10	uc002era.2,uc002erb.2	1.27361	0.0525574
16:67063716:+,16:67070542:+	1.26977	3.75135	12.8301	3.73441e-17	1.25621e-14	28.8348	CBFB	core	NM_001755,NM_022845	ENST00000290858,ENST00000412916	CBFB.aAug10,CBFB.bAug10,CBFB.cAug10,CBFB.dAug10,CBFB.eAug10	uc002era.2,uc002erb.2	1.27361	-0.00383637
5:57751982:+,5:57752319:+	2.42602	2.58469	12.799	4.08978e-17	1.35306e-14	27.5147	PLK2	core	NM_001252226,NM_006622	ENST00000274289,ENST00000442330	PLK2.aAug10	uc003jrn.2	2.48928	-0.0632574
14:55312570:+,14:55313817:+	1.24383	3.82005	12.7757	4.37725e-17	1.43396e-14	28.6773	GCH1	core	NM_000161,NM_001024024,NM_001024070,NM_001024071	ENST00000254299,ENST00000395514,ENST00000395524,ENST00000491895,ENST00000536224,ENST00000543643	GCH1.aAug10,GCH1.bAug10,GCH1.cAug10,GCH1.dAug10,GCH1.eAug10	uc001xbh.1,uc001xbi.1,uc001xbj.1,uc001xbk.1,uc001xbl.1	1.57802	-0.334191
X:47444730:+,X:47444942:+	1.59737	3.76706	12.7076	5.34559e-17	1.73395e-14	28.341	SYN1,TIMP1	core	NM_003254	ENST00000218388,ENST00000377017	TIMP1.aAug10,TIMP1.bAug10,TIMP1.cAug10,TIMP1.gAug10	uc004dif.2	1.58916	0.00821327
16:67063388:+,16:67063630:+	1.51549	3.10357	12.7066	5.36215e-17	1.73395e-14	28.3437	CBFB	core	NM_001755,NM_022845	ENST00000290858,ENST00000412916	CBFB.aAug10,CBFB.bAug10,CBFB.cAug10,CBFB.dAug10,CBFB.eAug10,CBFB.fAug10,CBFB.iAug10	uc002era.2,uc002erb.2,uc010vja.1	1.27361	0.241881
1:99387614:+,1:99418626:+	1.27251	3.81015	12.5888	7.58421e-17	2.39079e-14	28.1269	LPPR5	core	NM_001010861,NM_001037317	ENST00000263177,ENST00000370188	LPPR5.aAug10,LPPR5.bAug10	uc001dsb.2,uc001dsc.2	1.16999	0.102512
18:40854359:+,18:40857213:+	2.14366	2.24103	12.5576	8.3175e-17	2.58041e-14	27.3001	SYT4	core	NM_020783	ENST00000255224,ENST00000442661	SYT4.aAug10	uc002law.2	2.04476	0.098901
17:38151321:+,17:38151429:+	1.0422	4.73864	12.5368	8.84549e-17	2.69516e-14	28.0191	PSMD3	core	NM_002809	ENST00000264639,ENST00000415039,ENST00000485835,ENST00000541736	PSMD3.aAug10,PSMD3.bAug10,PSMD3.cAug10,PSMD3.dAug10,PSMD3.eAug10,PSMD3.fAug10,PSMD3.gAug10	uc002htn.1,uc010wen.1,uc010weo.1	1.06609	-0.0238879
15:74490159:+,15:74494496:+	1.16057	3.99173	12.5185	9.33602e-17	2.81892e-14	27.9458	STRA6	core	NM_001142617,NM_001142618,NM_001142619,NM_001142620,NM_001199040,NM_001199041,NM_001199042,NM_022369	ENST00000323940,ENST00000395105,ENST00000423167,ENST00000432245,ENST00000449139,ENST00000535552	STRA6.aAug10,STRA6.bAug10,STRA6.cAug10,STRA6.dAug10,STRA6.eAug10,STRA6.fAug10,STRA6.gAug10,STRA6.hAug10,STRA6.iAug10,STRA6.jAug10,STRA6.kAug10,STRA6.mAug10,STRA6.qAug10,STRA6.rAug10,STRA6.sAug10,STRA6.tAug10,STRA6.uAug10,STRA6.vaAug10,STRA6.vbAug10,STRA6.vdAug10,STRA6.vhAug10,STRA6.viAug10,STRA6.vjAug10,STRA6.vmAug10,STRA6.vnAug10	uc002axj.2,uc002axk.2,uc002axm.2,uc002axn.2,uc010bji.2,uc010bjj.1,uc010bjk.2,uc010ulh.1,uc010uli.1	1.03787	0.122699
20:48256337:+,20:48257015:+	1.33415	3.89557	12.4685	1.08275e-16	3.23032e-14	27.7479	B4GALT5	core	NM_004776	ENST00000371711	B4GALT5.aAug10	uc002xuu.3	1.23294	0.101213
18:40851797:+,18:40853545:+	1.92486	2.23859	12.3145	1.7128e-16	4.93384e-14	26.7686	SYT4	core	NM_020783	ENST00000255224,ENST00000442661	SYT4.aAug10,SYT4.bAug10	uc002law.2,uc010xcm.1	2.04476	-0.119907
7:45025696:+,7:45026124:+	1.16612	3.91891	12.2592	2.02107e-16	5.7557e-14	27.1841	C7orf40	core	NR_003697	None	C7orf40andSNORA9.bAug10,C7orf40andSNORA9.cAug10,C7orf40andSNORA9.dAug10,C7orf40andSNORA9.eAug10,C7orf40andSNORA9.fAug10,C7orf40andSNORA9.gAug10,C7orf40andSNORA9.iAug10	uc003tml.3	1.20058	-0.0344613
10:28970474:+,10:28970912:+	1.28676	3.90354	12.2288	2.21383e-16	6.25136e-14	27.0665	BAMBI	core	NM_012342	ENST00000375533,ENST00000542444	BAMBI.aAug10	uc001iuj.1	1.28339	0.00337655
12:57485781:+,12:57486231:+	2.20848	2.28552	12.2058	2.37187e-16	6.62299e-14	26.0479	NAB2	core	NM_005967	ENST00000300131,ENST00000342556	NAB2.aAug10,NAB2.bAug10	uc001smz.2	2.20419	0.00428594
21:19629444:+,21:19632517:+	2.29267	1.47276	12.1931	2.46423e-16	6.84279e-14	25.9428	CHODL	core	NM_001204174,NM_001204175,NM_001204176,NM_001204177,NM_001204178,NM_024944	ENST00000299295,ENST00000338326,ENST00000400127,ENST00000400128,ENST00000400131,ENST00000400135,ENST00000543733	CHODL.aAug10,CHODL.bAug10,CHODL.cAug10,CHODL.dAug10	uc002ykr.2,uc002yks.2,uc002ykt.2,uc002yku.2,uc002ykv.2	2.58141	-0.288743
11:119291639:+,11:119293823:+	1.0166	4.78673	12.1823	2.54512e-16	7.02845e-14	26.9751	LOC100499227,THY1	core	NM_006288	ENST00000284240,ENST00000524970,ENST00000528295,ENST00000532974,ENST00000533840	THY1.aAug10,THY1.dAug10,THY1.eAug10,THY1.gAug10,THY1.hAug10,THY1.iAug10	uc001pwr.2,uc001pws.2	1.01147	0.00513719
8:29196018:+,8:29197615:+	1.36627	3.57574	12.1634	2.69381e-16	7.39832e-14	26.8458	DUSP4	core	NM_001394,NM_057158	ENST00000240100,ENST00000240101	DUSP4.aAug10,DUSP4.bAug10	uc003xhl.2,uc003xhm.2	1.36906	-0.00279003
6:3156386:+,6:3157641:+	1.19632	4.27728	12.1431	2.8634e-16	7.84259e-14	26.8448	TUBB2A	core	NM_001069	ENST00000333628,ENST00000392362,ENST00000489942	TUBB2A.aAug10,TUBB2A.bAug10,TUBB2A.cAug10,TUBB2A.gAug10,TUBB2A.hAug10,TUBB2A.iAug10	uc003mvc.2,uc003mvd.2	1.06517	0.131156
5:83356303:+,5:83360519:+	1.36124	3.37053	12.136	2.92518e-16	7.96826e-14	26.7432	EDIL3	core	NM_005711	ENST00000296591,ENST00000380138,ENST00000510271	EDIL3.cAug10,EDIL3.dAug10,EDIL3.eAug10	uc003kio.1,uc003kip.1,uc011ctt.1	1.26206	0.0991717
12:71078563:+,12:71092045:+	1.40487	3.25232	12.1296	2.9821e-16	8.07939e-14	26.7128	PTPRR	core	NM_001207015,NM_001207016,NM_002849,NM_130846	ENST00000283228,ENST00000342084,ENST00000378778,ENST00000440835,ENST00000548220,ENST00000549308,ENST00000550661,ENST00000551219	PTPRR.aAug10,PTPRR.bAug10,PTPRR.cAug10,PTPRR.dAug10,PTPRR.eAug10,PTPRR.fAug10,PTPRR.hAug10,PTPRR.lAug10	uc001swh.1,uc001swi.1,uc009zrs.2,uc010stq.1,uc010str.1	1.25745	0.147418
7:120991323:+,7:121000097:+	1.09904	4.09358	12.0433	3.86885e-16	1.02872e-13	26.5569	FAM3C	core	NM_001040020,NM_014888	ENST00000359943	FAM3C.aAug10,FAM3C.bAug10,FAM3C.cAug10	uc003vjx.2,uc010lkm.2	1.05921	0.0398316
5:83360663:+,5:83362270:+	1.67486	3.23628	12.0114	4.26159e-16	1.12421e-13	26.3384	EDIL3	core	NM_005711	ENST00000296591,ENST00000380138,ENST00000510271	EDIL3.aAug10,EDIL3.bAug10,EDIL3.cAug10,EDIL3.dAug10,EDIL3.eAug10	uc003kio.1,uc003kip.1,uc011ctt.1	1.26206	0.412798
9:33796800:+,9:33797827:+	1.00442	4.71907	11.9851	4.61492e-16	1.19849e-13	26.3884	PRSS3	core	NM_001197097,NM_001197098,NM_002771,NM_007343	ENST00000342836,ENST00000361005,ENST00000379405,ENST00000429677,ENST00000457896	PRSS3.bAug10,PRSS3.cAug10,PRSS3.dAug10,PRSS3.eAug10,PRSS3.fAug10,PRSS3.hAug10	uc003zti.3,uc003ztj.3,uc003ztl.3	1.07731	-0.0728899
9:131140385:+,9:131150095:+	1.16298	3.81031	11.8853	6.24728e-16	1.55398e-13	26.0789	URM1	core	NM_001135947,NM_030914	ENST00000372847,ENST00000372850,ENST00000372853,ENST00000452446,ENST00000470840,ENST00000483206	URM1.aAug10,URM1.bAug10,URM1.cAug10,URM1.dAug10,URM1.eAug10,URM1.fAug10,URM1.gAug10,URM1.hAug10	uc004buv.2,uc004buw.2,uc011may.1	1.07039	0.0925955
12:71148081:+,12:71155251:+	1.37903	3.24652	11.8169	7.69702e-16	1.8819e-13	25.7801	PTPRR	core	NM_001207015,NM_002849	ENST00000283228,ENST00000342084	PTPRR.aAug10,PTPRR.bAug10	uc001swi.1,uc010stq.1	1.25745	0.121581
6:36652323:+,6:36653528:+	3.7307	0.964772	11.7304	1.00251e-15	2.37577e-13	21.7978	CDKN1A	core	NM_000389,NM_001220777,NM_001220778,NM_078467	ENST00000244741,ENST00000373711,ENST00000405375,ENST00000448526	CDKN1A.aAug10,CDKN1A.bAug10,CDKN1A.cAug10,CDKN1A.dAug10,CDKN1A.gAug10,CDKN1A.hAug10,CDKN1A.iAug10,CDKN1A.jAug10,CDKN1A.kAug10,CDKN1A.lAug10	uc003omm.3,uc003omn.2,uc011dtq.1	3.9556	-0.224898
20:48260187:+,20:48263502:+	1.19346	3.98012	11.67	1.20667e-15	2.82619e-13	25.4171	B4GALT5	core	NM_004776	ENST00000371711	B4GALT5.aAug10,B4GALT5.bAug10	uc002xuu.3	1.23294	-0.0394846
21:19629135:+,21:19629287:+	2.84539	1.13877	11.6623	1.23548e-15	2.88694e-13	23.4834	CHODL	core	NM_001204174,NM_001204175,NM_001204176,NM_001204177,NM_001204178,NM_024944	ENST00000299295,ENST00000338326,ENST00000400127,ENST00000400128,ENST00000400131,ENST00000400135,ENST00000543733	CHODL.aAug10,CHODL.bAug10,CHODL.cAug10,CHODL.dAug10,CHODL.eAug10	uc002ykr.2,uc002yks.2,uc002ykt.2,uc002yku.2,uc002ykv.2	2.58141	0.263979
20:30193616:+,20:30193856:+	1.56619	3.13848	11.6472	1.29394e-15	3.0165e-13	25.1804	ID1	core	NM_002165	ENST00000376112	ID1.aAug10,ID1.bAug10	uc002wwg.1	1.5668	-0.000601944
17:38145072:+,17:38145992:+	1.00876	4.53517	11.6161	1.4238e-15	3.29624e-13	25.2763	PSMD3	core	NM_002809	ENST00000264639,ENST00000415039,ENST00000541736	PSMD3.aAug10,PSMD3.bAug10,PSMD3.cAug10,PSMD3.dAug10,PSMD3.eAug10	uc002htn.1,uc010wen.1,uc010weo.1	1.06609	-0.0573263
5:57753998:+,5:57754226:+	2.2154	2.42198	11.5834	1.57468e-15	3.62047e-13	24.2044	PLK2	core	NM_001252226,NM_006622	ENST00000274289,ENST00000442330,ENST00000508300,ENST00000509555,ENST00000537944	PLK2.aAug10,PLK2.bAug10,PLK2.cAug10,PLK2.eAug10,PLK2.jAug10	uc003jrn.2	2.48928	-0.273878
5:57751606:+,5:57751853:+	2.50132	2.27824	11.5372	1.81619e-15	4.10049e-13	23.7163	PLK2	core	NM_001252226,NM_006622	ENST00000274289,ENST00000442330,ENST00000503378,ENST00000505244	PLK2.aAug10,PLK2.dAug10	uc003jrn.2	2.48928	0.0120366
5:57752919:+,5:57753008:+	2.55585	2.2367	11.532	1.84525e-15	4.15674e-13	23.5662	PLK2	core	NM_001252226,NM_006622	ENST00000274289,ENST00000442330,ENST00000502671,ENST00000503115,ENST00000503713,ENST00000510629,ENST00000515415,ENST00000537944	PLK2.aAug10,PLK2.bAug10,PLK2.cAug10,PLK2.dAug10,PLK2.eAug10,PLK2.hAug10	uc003jrn.2	2.48928	0.0665717
5:57751241:+,5:57751366:+	2.44486	2.30247	11.5129	1.95775e-15	4.38983e-13	23.694	PLK2	core	NM_001252226,NM_006622	ENST00000274289,ENST00000503378	PLK2.aAug10,PLK2.cAug10,PLK2.dAug10	uc003jrn.2	2.48928	-0.0444233
15:63336351:+,15:63349184:+	1.08677	4.16731	11.5107	1.97126e-15	4.39128e-13	24.9518	TPM1	core	NM_000366,NM_001018004,NM_001018005,NM_001018006	ENST00000288398,ENST00000357980,ENST00000358278,ENST00000403994,ENST00000558314,ENST00000558347,ENST00000559556,ENST00000559831,ENST00000560970	TPM1.aAug10,TPM1.bAug10,TPM1.cAug10,TPM1.dAug10,TPM1.fAug10,TPM1.hAug10,TPM1.iAug10,TPM1.jAug10,TPM1.oAug10,TPM1.sAug10,TPM1.tAug10,TPM1.uAug10,TPM1.vdAug10,TPM1.vfAug10,TPM1.viAug10,TPM1.vtAug10	uc002alg.2,uc002alh.2,uc002ali.2,uc002alk.2,uc002alm.2,uc002alp.2,uc010bgn.2	0.810991	0.275782
4:151412187:+,4:151509200:+	1.16751	3.76377	11.4968	2.05788e-15	4.56393e-13	24.9117	LRBA	core	NM_001199282,NM_006726	ENST00000357115,ENST00000507224,ENST00000509835,ENST00000510413,ENST00000513021,ENST00000535741	LRBA.aAug10,LRBA.bAug10,LRBA.cAug10,LRBA.dAug10,LRBA.nAug10,LRBA.sAug10	uc003ilt.3,uc003ilu.3,uc010ipj.2	-0.0768926	1.2444
14:52782109:+,14:52793939:+	1.39008	3.01586	11.4849	2.13464e-15	4.72374e-13	24.8236	PTGER2	core	NM_000956	ENST00000245457,ENST00000557436	PTGER2.aAug10,PTGER2.bAug10	uc001wzr.2	1.38844	0.00164483
9:131133694:+,9:131140315:+	1.29383	3.29186	11.3865	2.89629e-15	6.21703e-13	24.5285	URM1	core	NM_001135947,NM_030914	ENST00000372850,ENST00000372853,ENST00000452446	URM1.aAug10,URM1.cAug10,URM1.fAug10,URM1.hAug10,URM1.jAug10	uc004buv.2,uc011may.1	1.07039	0.223442
8:75737757:+,8:75756216:+	2.21718	1.25434	11.3802	2.95366e-15	6.31316e-13	23.6605	PI15	core	NM_015886	ENST00000260113,ENST00000523773	PI15.aAug10,PI15.bAug10	uc003yal.2,uc003yam.2	2.34316	-0.125983
X:47441873:+,X:47442807:+	1.46117	3.75679	11.3705	3.04433e-15	6.47931e-13	24.4613	SYN1,TIMP1	core	NM_003254	ENST00000218388,ENST00000377018,ENST00000456754	TIMP1.aAug10,TIMP1.bAug10,TIMP1.eAug10,TIMP1.fAug10,TIMP1.iAug10	uc004dif.2,uc010nht.1,uc011mlr.1	1.58916	-0.127984
19:4283239:+,19:4284778:+	1.2015	3.54486	11.3149	3.61894e-15	7.63742e-13	24.3348	SHD	core	NM_020209	ENST00000221852,ENST00000543264	SHD.aAug10,SHD.bAug10	uc002lzw.2,uc010dtu.2	1.14462	0.056876
13:36046673:+,13:36124614:+	1.34815	2.98441	11.3029	3.75746e-15	7.87997e-13	24.2385	MIR548F5,NBEA	core	NM_015678	ENST00000310336,ENST00000379939,ENST00000400445,ENST00000402346,ENST00000422518,ENST00000540320,ENST00000543274	NBEA.aAug10,NBEA.bAug10,NBEA.dAug10,NBEA.hAug10,NBEA.mAug10	uc001uvb.2,uc010abi.2,uc010tee.1	0.941396	0.406756
14:55326454:+,14:55332045:+	1.20725	3.48685	11.3021	3.76635e-15	7.88213e-13	24.2983	GCH1	core	NM_000161,NM_001024024,NM_001024070,NM_001024071	ENST00000254299,ENST00000395514,ENST00000395521,ENST00000395524,ENST00000491895,ENST00000536224,ENST00000543643	GCH1.aAug10,GCH1.bAug10,GCH1.cAug10,GCH1.dAug10,GCH1.eAug10,GCH1.fAug10,GCH1.gAug10	uc001xbh.1,uc001xbi.1,uc001xbj.1,uc001xbk.1,uc001xbl.1,uc010aol.1	1.57802	-0.370767
20:48257202:+,20:48259005:+	1.35462	3.53589	11.2927	3.87825e-15	8.08256e-13	24.2254	B4GALT5	core	NM_004776	ENST00000371711	B4GALT5.aAug10	uc002xuu.3	1.23294	0.121683
20:48253979:+,20:48256215:+	1.21369	3.86112	11.2891	3.92268e-15	8.1582e-13	24.2526	B4GALT5	core	NM_004776	ENST00000371711	B4GALT5.aAug10	uc002xuu.3	1.23294	-0.019252
12:115115461:+,12:115117310:+	1.16069	3.86097	11.2683	4.18531e-15	8.66844e-13	24.1946	TBX3	core	NM_005996,NM_016569	ENST00000257566,ENST00000349155,ENST00000361100,ENST00000548503	TBX3.aAug10,TBX3.bAug10,TBX3.fAug10	uc001tvt.1,uc001tvu.1	1.07314	0.0875485
1:99380476:+,1:99387438:+	1.06225	3.93733	11.2634	4.25083e-15	8.7679e-13	24.198	LPPR5	core	NM_001010861,NM_001037317	ENST00000263177,ENST00000370188	LPPR5.aAug10,LPPR5.bAug10	uc001dsb.2,uc001dsc.2	1.16999	-0.10774
X:148585019:+,X:148585687:+	1.09564	3.9921	11.2504	4.426e-15	9.06256e-13	24.1596	IDS	core	NM_000202,NM_006123	ENST00000340855,ENST00000370441,ENST00000370443,ENST00000428056,ENST00000464251,ENST00000466323,ENST00000521702	IDS.aAug10,IDS.cAug10,IDS.dAug10,IDS.eAug10,IDS.gAug10,IDS.kAug10	uc011mxe.1,uc011mxg.1,uc011mxh.1,uc011mxi.1,uc011mxj.1	0.937264	0.158376
14:55313848:+,14:55326399:+	1.13511	3.62737	11.2501	4.42985e-15	9.06256e-13	24.1494	GCH1	core	NM_000161,NM_001024024,NM_001024070,NM_001024071	ENST00000254299,ENST00000395514,ENST00000395524,ENST00000491895,ENST00000536224,ENST00000543643	GCH1.aAug10,GCH1.bAug10,GCH1.cAug10,GCH1.dAug10,GCH1.eAug10	uc001xbh.1,uc001xbi.1,uc001xbj.1,uc001xbk.1,uc001xbl.1	1.57802	-0.442915
1:156221268:+,1:156222205:+	1.24558	3.52065	11.2478	4.4624e-15	9.10466e-13	24.118	SMG5	core	NM_015327	ENST00000361813,ENST00000420555,ENST00000473643	SMG5.aAug10,SMG5.cAug10,SMG5.fAug10	uc001foc.3	1.08943	0.156147
1:23884906:+,1:23885426:+	1.0176	4.15334	11.2284	4.74223e-15	9.58687e-13	24.0906	ID3	core	NM_002167	ENST00000374561,ENST00000463312	ID3.cAug10,ID3.dAug10	uc001bhh.3	1.07596	-0.0583553
12:42863389:+,12:42864048:+	1.7461	2.23433	11.2218	4.84016e-15	9.76252e-13	23.6972	PRICKLE1	core	NM_001144881,NM_001144882,NM_001144883,NM_153026	ENST00000345127,ENST00000445766,ENST00000455697,ENST00000547113,ENST00000548696,ENST00000551050,ENST00000552108,ENST00000552240	PRICKLE1.aAug10,PRICKLE1.bAug10,PRICKLE1.cAug10,PRICKLE1.dAug10,PRICKLE1.fAug10,PRICKLE1.gAug10,PRICKLE1.hAug10,PRICKLE1.iAug10	uc001rnl.2,uc001rnm.2,uc009zka.2,uc010skv.1,uc010skw.1	1.51598	0.230121
11:62458893:+,11:62459848:+	1.03531	3.90502	11.2139	4.962e-15	9.96815e-13	24.0476	BSCL2	core	NM_001122955,NM_032667,NR_037946,NR_037948,NR_037949	ENST00000301781,ENST00000360796,ENST00000403550,ENST00000403734,ENST00000405837,ENST00000407022,ENST00000412351,ENST00000421906,ENST00000433053,ENST00000468505,ENST00000532115	HNRNPUL2andBSCL2.bAug10,HNRNPUL2andBSCL2.cAug10,HNRNPUL2andBSCL2.dAug10,HNRNPUL2andBSCL2.eAug10,HNRNPUL2andBSCL2.fAug10,HNRNPUL2andBSCL2.gAug10,HNRNPUL2andBSCL2.hAug10,HNRNPUL2andBSCL2.iAug10,HNRNPUL2andBSCL2.jAug10,HNRNPUL2andBSCL2.kAug10,HNRNPUL2andBSCL2.nAug10	uc001nuo.1,uc001nup.2,uc001nuq.1,uc001nur.3,uc001nut.3,uc001nuu.1,uc009yod.2	0.775894	0.259419
4:167713440:+,4:167810281:+	1.0118	3.8994	11.2084	5.04775e-15	1.01201e-12	24.0291	SPOCK3	core	NM_001040159,NM_001204352,NM_001204353,NM_001204354,NM_001204355,NM_001204358,NM_001251967,NM_016950	ENST00000357154,ENST00000357545,ENST00000421836,ENST00000502330,ENST00000502821,ENST00000504953,ENST00000505187,ENST00000506886,ENST00000507137,ENST00000507370,ENST00000511226,ENST00000511269,ENST00000511531,ENST00000511905,ENST00000512648,ENST00000512681,ENST00000515143,ENST00000534949,ENST00000541354,ENST00000541637	SPOCK3.aAug10,SPOCK3.bAug10,SPOCK3.cAug10,SPOCK3.dAug10,SPOCK3.eAug10,SPOCK3.fAug10,SPOCK3.gAug10,SPOCK3.hAug10,SPOCK3.jAug10,SPOCK3.nAug10	uc003iri.1,uc003irj.1,uc003irk.3,uc011cjq.1,uc011cjr.1,uc011cjs.1,uc011cjt.1,uc011cju.1,uc011cjv.1	1.01038	0.00142435
4:119649805:+,4:119652471:+	1.31589	3.23636	11.206	5.08539e-15	1.01684e-12	23.9582	SEC24D	core	NM_014822	ENST00000280551,ENST00000379735,ENST00000429811,ENST00000505134,ENST00000511481	SEC24D.aAug10,SEC24D.bAug10,SEC24D.cAug10,SEC24D.dAug10,SEC24D.fAug10	uc003ich.3,uc003ici.3,uc003icj.3	1.08439	0.231497
1:156220787:+,1:156221194:+	1.28417	3.30679	11.163	5.81954e-15	1.1394e-12	23.8346	SMG5	core	NM_015327	ENST00000361813,ENST00000420555	SMG5.aAug10	uc001foc.3	1.08943	0.194743
12:111884658:+,12:111884746:+	2.33709	1.9789	11.1378	6.29824e-15	1.22594e-12	22.6702	SH2B3	core	NM_005475	ENST00000341259,ENST00000538307,ENST00000551001	SH2B3.aAug10,SH2B3.bAug10,SH2B3.cAug10,SH2B3.eAug10,SH2B3.fAug10	uc001tse.2,uc001tsf.2,uc010syf.1,uc010syg.1	1.94013	0.396959
6:3155157:+,6:3155859:+	1.03981	4.52466	11.1297	6.46083e-15	1.25273e-12	23.7877	TUBB2A	core	NM_001069	ENST00000333628	TUBB2A.aAug10,TUBB2A.cAug10,TUBB2A.dAug10,TUBB2A.eAug10,TUBB2A.fAug10	uc003mvb.2,uc003mvc.2	1.06517	-0.0253575
5:57753410:+,5:57753911:+	2.6031	2.13526	11.0743	7.68952e-15	1.46545e-12	22.2195	PLK2	core	NM_001252226,NM_006622	ENST00000274289,ENST00000442330,ENST00000508300,ENST00000509422,ENST00000509555,ENST00000515415,ENST00000537944	PLK2.aAug10,PLK2.bAug10,PLK2.cAug10,PLK2.eAug10,PLK2.fAug10	uc003jrn.2	2.48928	0.113825
16:58540919:+,16:58541712:+	1.40807	2.93575	11.0227	9.04791e-15	1.71132e-12	23.3521	NDRG4	core	NM_001130487,NM_001242833,NM_001242834,NM_001242835,NM_001242836,NM_020465,NM_022910,NR_040072	ENST00000258187,ENST00000356752,ENST00000394279,ENST00000394282,ENST00000421602	NDRG4.aAug10,NDRG4.bAug10,NDRG4.cAug10,NDRG4.dAug10,NDRG4.eAug10,NDRG4.fAug10,NDRG4.gAug10,NDRG4.hAug10,NDRG4.iAug10,NDRG4.jAug10,NDRG4.mAug10,NDRG4.nAug10,NDRG4.pAug10	uc002enk.2,uc002enm.2,uc002eno.2,uc002enp.2,uc010cdk.2,uc010vif.1,uc010vig.1,uc010vih.1,uc010vii.1	1.2716	0.136461
11:62475866:+,11:62476150:+	2.90864	1.12572	11.0008	9.69459e-15	1.82674e-12	21.6316	BSCL2,GNG3	core	NM_012202	ENST00000294117	GNG3.aAug10,GNG3.bAug10	uc001nuv.2	2.94554	-0.0368942
15:89731534:+,15:89734311:+	1.41661	3.19655	10.9918	9.97464e-15	1.86548e-12	23.2396	ABHD2	core	NM_007011,NM_152924	ENST00000352732,ENST00000355100	ABHD2.aAug10,ABHD2.bAug10,ABHD2.eAug10	uc002bnj.2,uc002bnk.2	1.35802	0.0585982
18:56824897:+,18:56825864:+	1.07132	3.93674	10.9863	1.01472e-14	1.89422e-12	23.3417	SEC11C	core	NM_033280	ENST00000299714	SEC11C.aAug10,SEC11C.fAug10,SEC11C.iAug10	uc002lht.2	0.996401	0.0749182
5:83362425:+,5:83402467:+	1.31734	3.32695	10.9799	1.03543e-14	1.92572e-12	23.2833	EDIL3	core	NM_005711	ENST00000296591,ENST00000380138	EDIL3.aAug10,EDIL3.cAug10,EDIL3.dAug10	uc003kio.1,uc003kip.1	1.26206	0.0552728
5:112458523:+,5:112478915:+	1.32425	3.32333	10.9731	1.05809e-14	1.96421e-12	23.2271	MCC	core	NM_001085377,NM_002387	ENST00000302475,ENST00000408903,ENST00000506605,ENST00000511847,ENST00000514701,ENST00000515367	MCC.aAug10,MCC.bAug10,MCC.cAug10,MCC.dAug10,MCC.eAug10,MCC.gAug10	uc003kqj.3,uc003kqk.3,uc003kql.3,uc010jcd.1,uc011cwb.1	1.22735	0.0968992
7:24323894:+,7:24324860:+	1.68831	2.33456	10.9704	1.06716e-14	1.97374e-12	23.022	NPY	core	NM_000905	ENST00000242152	NPY.cAug10	uc003sww.1	1.98824	-0.29993
21:19632603:+,21:19635108:+	2.70487	1.1644	10.9165	1.26573e-14	2.31959e-12	21.5655	CHODL	core	NM_001204174,NM_001204175,NM_001204176,NM_024944	ENST00000299295,ENST00000400127,ENST00000400128,ENST00000543733	CHODL.aAug10,CHODL.bAug10,CHODL.dAug10	uc002ykr.2,uc002yks.2,uc002ykv.2	2.58141	0.123461
5:57753206:+,5:57753315:+	2.88502	1.91139	10.9137	1.27701e-14	2.336e-12	21.2053	PLK2	core	NM_001252226,NM_006622	ENST00000274289,ENST00000442330,ENST00000502671,ENST00000503115,ENST00000509555,ENST00000515415,ENST00000537944	PLK2.aAug10,PLK2.bAug10,PLK2.cAug10,PLK2.eAug10,PLK2.hAug10	uc003jrn.2	2.48928	0.395737
2:91843528:+,2:91847935:+	1.31201	2.87623	10.9052	1.31181e-14	2.38659e-12	23.021	LOC654342	core	NR_027238	ENST00000271699	LOC654342.bAug10,LOC654342.cAug10,LOC654342.dAug10,LOC654342.eAug10,LOC654342.fAug10,LOC654342.gAug10,LOC654342.hAug10,LOC654342.iAug10,LOC654342.jAug10,LOC654342.kAug10,LOC654342.lAug10,LOC654342.mAug10	uc002sts.3,uc002stt.2,uc010yub.1	1.63889	-0.326885
5:57750848:+,5:57751112:+	2.4916	2.28901	10.9009	1.32964e-14	2.41464e-12	21.9302	PLK2	core	NM_001252226,NM_006622	ENST00000274289,ENST00000503378	PLK2.aAug10,PLK2.cAug10,PLK2.dAug10	uc003jrn.2	2.48928	0.00232447
9:33798620:+,9:33799026:+	1.01282	4.38049	10.8749	1.44374e-14	2.60299e-12	22.9962	PRSS3	core	NM_001197097,NM_001197098,NM_002771,NM_007343	ENST00000342836,ENST00000361005,ENST00000379405,ENST00000429677	PRSS3.aAug10,PRSS3.bAug10,PRSS3.cAug10,PRSS3.dAug10,PRSS3.eAug10,PRSS3.gAug10	uc003zti.3,uc003ztj.3,uc003ztl.3	1.07731	-0.0644903
5:112487119:+,5:112676216:+	1.68339	2.3393	10.8677	1.47718e-14	2.65851e-12	22.6404	MCC	core	NM_001085377	ENST00000408903	MCC.aAug10,MCC.eAug10	uc003kqk.3,uc003kql.3	1.22735	0.456034
12:57486751:+,12:57486846:+	2.24081	2.18925	10.8458	1.58373e-14	2.83499e-12	22.0495	NAB2	core	NM_005967	ENST00000300131,ENST00000342556,ENST00000357680,ENST00000554839	NAB2.aAug10,NAB2.bAug10,NAB2.dAug10	uc001smz.2	2.20419	0.036616
11:62475387:+,11:62475767:+	2.97379	0.823607	10.8419	1.60336e-14	2.85991e-12	21.0283	BSCL2,GNG3	core	NM_012202	ENST00000294117	GNG3.bAug10	uc001nuv.2	2.94554	0.0282476
18:56819917:+,18:56822920:+	1.00261	4.16176	10.8307	1.66158e-14	2.95849e-12	22.858	SEC11C	core	NM_033280	ENST00000299714,ENST00000509791	SEC11C.aAug10,SEC11C.bAug10,SEC11C.cAug10	uc002lht.2,uc010xej.1	0.996401	0.00620802
1:156237469:+,1:156237906:+	1.19033	3.44401	10.8089	1.78062e-14	3.14254e-12	22.7633	SMG5	core	NM_015327	ENST00000361813	SMG5.aAug10,SMG5.bAug10	uc001foc.3	1.08943	0.100903
16:58537807:+,16:58538058:+	1.38943	3.06857	10.7934	1.87078e-14	3.2812e-12	22.6715	NDRG4	core	NM_001130487,NM_001242833,NM_001242834,NM_001242835,NM_001242836,NM_020465,NM_022910,NR_040072	ENST00000258187,ENST00000356752,ENST00000394279,ENST00000394282,ENST00000421602	NDRG4.aAug10,NDRG4.bAug10,NDRG4.cAug10,NDRG4.dAug10,NDRG4.eAug10,NDRG4.gAug10,NDRG4.hAug10,NDRG4.iAug10,NDRG4.jAug10,NDRG4.lAug10,NDRG4.mAug10,NDRG4.nAug10,NDRG4.oAug10,NDRG4.qAug10,NDRG4.rAug10,NDRG4.tAug10,NDRG4.uAug10,NDRG4.vaAug10,NDRG4.vbAug10,NDRG4.vcAug10,NDRG4.vdAug10,NDRG4.veAug10,NDRG4.vfAug10,NDRG4.vgAug10,NDRG4.vhAug10,NDRG4.viAug10,NDRG4.vjAug10,NDRG4.vkAug10,NDRG4.voAug10,NDRG4.vqAu…	uc002enk.2,uc002enm.2,uc002eno.2,uc002enp.2,uc010vif.1,uc010vig.1,uc010vih.1,uc010vii.1	1.2716	0.117829
13:49551053:+,13:49580288:+	1.11416	3.58438	10.7857	1.91735e-14	3.35433e-12	22.7171	FNDC3A	extended	None	ENST00000337156,ENST00000484074,ENST00000541916	FNDC3A.aAug10,FNDC3A.dAug10,FNDC3A.eAug10,FNDC3A.nAug10	uc001vcn.2,uc001vco.2	0.728308	0.385857
7:80432095:+,7:80433422:+	2.28876	1.44306	10.7806	1.94856e-14	3.40299e-12	21.6121	SEMA3C	core	NM_006379	ENST00000265361,ENST00000419255,ENST00000458729,ENST00000536800,ENST00000544525	SEMA3C.aAug10,SEMA3C.bAug10,SEMA3C.cAug10	uc003uhj.2,uc011kgw.1,uc011kgx.1	2.72675	-0.437988
5:95152330:+,5:95158160:+	1.76616	2.01449	10.7687	2.02429e-14	3.51078e-12	22.2581	GLRX	core	NM_001118890,NM_001243658,NM_001243659,NM_002064	ENST00000237858,ENST00000379979,ENST00000505427,ENST00000508780,ENST00000512469	GLRX.aAug10,GLRX.bAug10,GLRX.cAug10,GLRX.dAug10,GLRX.eAug10,GLRX.jAug10	uc003kln.3,uc003klo.3	1.83962	-0.0734653
21:19635210:+,21:19638271:+	2.45018	1.08779	10.7607	2.07641e-14	3.59495e-12	21.37	CHODL	core	NM_001204174,NM_001204175,NM_001204176,NM_024944	ENST00000299295,ENST00000400127,ENST00000400128,ENST00000543733	CHODL.aAug10,CHODL.bAug10,CHODL.dAug10	uc002ykr.2,uc002yks.2,uc002ykv.2	2.58141	-0.131232
12:42864161:+,12:42866187:+	1.64994	2.12223	10.7594	2.08494e-14	3.60349e-12	22.3331	PRICKLE1	core	NM_001144881,NM_001144882,NM_001144883,NM_153026	ENST00000345127,ENST00000445766,ENST00000455697,ENST00000547113,ENST00000548696,ENST00000551050,ENST00000552108,ENST00000552240	PRICKLE1.aAug10,PRICKLE1.bAug10,PRICKLE1.cAug10,PRICKLE1.dAug10,PRICKLE1.fAug10,PRICKLE1.gAug10,PRICKLE1.hAug10,PRICKLE1.iAug10,PRICKLE1.kAug10	uc001rnl.2,uc001rnm.2,uc009zka.2,uc010skv.1,uc010skw.1	1.51598	0.133962
12:111885631:+,12:111885787:+	1.8732	2.39424	10.7514	2.13894e-14	3.6715e-12	22.1674	SH2B3	core	NM_005475	ENST00000341259,ENST00000538307,ENST00000551001	SH2B3.aAug10,SH2B3.bAug10,SH2B3.cAug10	uc001tse.2,uc001tsf.2,uc010syf.1,uc010syg.1	1.94013	-0.0669354
5:83239387:+,5:83259024:+	1.3159	3.3756	10.7277	2.30672e-14	3.94599e-12	22.5125	EDIL3	core	NM_005711	ENST00000296591,ENST00000380138	EDIL3.cAug10,EDIL3.dAug10	uc003kio.1,uc003kip.1	1.26206	0.0538389
1:156231199:+,1:156233186:+	1.26194	3.23426	10.7219	2.34987e-14	4.01296e-12	22.4704	SMG5	core	NM_015327	ENST00000361813	SMG5.aAug10,SMG5.bAug10,SMG5.cAug10	uc001foc.3,uc009wrv.2	1.08943	0.172514
19:4282972:+,19:4283051:+	1.08776	3.92921	10.7086	2.45192e-14	4.1722e-12	22.4752	SHD	core	NM_020209	ENST00000221852,ENST00000543264	SHD.aAug10,SHD.bAug10	uc002lzw.2,uc010dtu.2	1.14462	-0.0568635
7:80433564:+,7:80434955:+	2.6678	1.27162	10.6934	2.5739e-14	4.35198e-12	20.7316	SEMA3C	core	NM_006379	ENST00000265361,ENST00000419255,ENST00000458729,ENST00000536800,ENST00000544525	SEMA3C.aAug10,SEMA3C.bAug10,SEMA3C.cAug10	uc003uhj.2,uc011kgw.1,uc011kgx.1	2.72675	-0.0589534
12:39096723:+,12:39117574:+	1.09504	3.79823	10.689	2.60979e-14	4.40431e-12	22.4131	CPNE8	core	NM_153634	ENST00000331366,ENST00000360449	CPNE8.aAug10,CPNE8.bAug10	uc001rls.1	0.918754	0.17629
4:119229732:+,4:119234356:+	1.02609	4.24731	10.6678	2.7929e-14	4.6507e-12	22.3462	PRSS12	core	NM_003619	ENST00000296498,ENST00000515089	PRSS12.aAug10,PRSS12.dAug10	uc003ica.1	0.970894	0.0551984
19:4288359:+,19:4290444:+	1.22965	3.14057	10.6599	2.86518e-14	4.76314e-12	22.2807	SHD	core	NM_020209	ENST00000221852,ENST00000543264	SHD.aAug10,SHD.cAug10,SHD.dAug10	uc002lzw.2	1.14462	0.0850268
15:89659752:+,15:89694908:+	1.30076	3.42205	10.641	3.04357e-14	5.03465e-12	22.2186	ABHD2	core	NM_007011,NM_152924	ENST00000352732,ENST00000355100	ABHD2.aAug10,ABHD2.bAug10,ABHD2.cAug10,ABHD2.dAug10,ABHD2.fAug10,ABHD2.hAug10,ABHD2.iAug10,ABHD2.pAug10	uc002bnj.2,uc002bnk.2	1.35802	-0.0572587
16:58540377:+,16:58540462:+	1.54038	2.62367	10.6346	3.10675e-14	5.10392e-12	22.0684	NDRG4	core	NM_001130487,NM_001242833,NM_001242834,NM_001242835,NM_001242836,NM_020465,NM_022910,NR_040072	ENST00000258187,ENST00000356752,ENST00000394279,ENST00000394282,ENST00000421602	NDRG4.aAug10,NDRG4.bAug10,NDRG4.cAug10,NDRG4.dAug10,NDRG4.eAug10,NDRG4.fAug10,NDRG4.gAug10,NDRG4.hAug10,NDRG4.iAug10,NDRG4.jAug10,NDRG4.lAug10,NDRG4.mAug10,NDRG4.nAug10,NDRG4.pAug10,NDRG4.vjAug10,NDRG4.vkAug10,NDRG4.vyAug10	uc002enk.2,uc002enm.2,uc002eno.2,uc002enp.2,uc002enq.1,uc010cdk.2,uc010vif.1,uc010vig.1,uc010vih.1,uc010vii.1	1.2716	0.268772
4:119718965:+,4:119726998:+	1.43066	2.93943	10.6338	3.11448e-14	5.10392e-12	22.1397	SEC24D	core	NM_014822	ENST00000280551,ENST00000379735,ENST00000419654,ENST00000506622,ENST00000509818,ENST00000514561	SEC24D.aAug10,SEC24D.bAug10,SEC24D.cAug10,SEC24D.eAug10,SEC24D.gAug10,SEC24D.hAug10	uc003ici.3,uc003icj.3,uc003icl.2,uc010imz.1,uc011cgg.1	1.08439	0.34627
17:38137443:+,17:38140547:+	1.09231	3.7691	10.6184	3.27209e-14	5.31617e-12	22.1873	PSMD3	core	NM_002809	ENST00000264639,ENST00000415039	PSMD3.aAug10,PSMD3.bAug10,PSMD3.cAug10	uc002htn.1	1.06609	0.0262188
5:95150093:+,5:95152211:+	1.91825	1.80829	10.5855	3.63631e-14	5.85101e-12	21.5055	GLRX	core	NM_001118890	ENST00000237858,ENST00000507412	GLRX.dAug10,GLRX.gAug10,GLRX.lAug10	uc003klo.3	1.83962	0.0786252
20:48259121:+,20:48260063:+	1.33232	3.36828	10.5557	4.00187e-14	6.40837e-12	21.9277	B4GALT5	core	NM_004776	ENST00000371711	B4GALT5.aAug10,B4GALT5.bAug10	uc002xuu.3	1.23294	0.0993768
19:4284901:+,19:4288240:+	1.08423	3.53263	10.5406	4.19986e-14	6.70399e-12	21.9434	SHD	core	NM_020209	ENST00000221852,ENST00000543264	SHD.aAug10,SHD.cAug10,SHD.eAug10	uc002lzw.2	1.14462	-0.0603917
5:112389656:+,5:112399681:+	1.25197	3.24534	10.5155	4.55416e-14	7.19425e-12	21.8195	MCC	core	NM_001085377,NM_002387	ENST00000302475,ENST00000408903,ENST00000514701,ENST00000515367	MCC.aAug10,MCC.bAug10,MCC.cAug10,MCC.dAug10,MCC.eAug10,MCC.fAug10	uc003kqj.3,uc003kqk.3,uc003kql.3,uc011cwb.1	1.22735	0.024617
20:48252996:+,20:48253878:+	1.11733	3.90387	10.5154	4.55472e-14	7.19425e-12	21.8624	B4GALT5	core	NM_004776	ENST00000371711	B4GALT5.aAug10	uc002xuu.3	1.23294	-0.115614
2:12863678:+,2:12880452:+	1.0998	4.0456	10.5068	4.683e-14	7.38118e-12	21.8366	TRIB2	core	NM_021643,NR_027303	ENST00000155926,ENST00000381465	TRIB2.aAug10,TRIB2.cAug10,TRIB2.eAug10,TRIB2.fAug10	uc002rbv.3,uc010yjp.1	1.05044	0.0493622
15:74488016:+,15:74488349:+	1.12607	3.47891	10.4847	5.02789e-14	7.86295e-12	21.7577	STRA6	core	NM_001142617,NM_001142618,NM_001142619,NM_001142620,NM_001199040,NM_001199041,NM_001199042,NM_022369	ENST00000323940,ENST00000395105,ENST00000416286,ENST00000423167,ENST00000432245,ENST00000449139,ENST00000535552,ENST00000536129,ENST00000545137	STRA6.aAug10,STRA6.bAug10,STRA6.cAug10,STRA6.dAug10,STRA6.eAug10,STRA6.fAug10,STRA6.gAug10,STRA6.iAug10,STRA6.jAug10,STRA6.kAug10,STRA6.lAug10,STRA6.mAug10,STRA6.nAug10,STRA6.qAug10,STRA6.rAug10,STRA6.sAug10,STRA6.tAug10,STRA6.uAug10,STRA6.vaAug10,STRA6.vbAug10,STRA6.vdAug10,STRA6.veAug10,STRA6.vfAug10,STRA6.vmAug10	uc002axi.2,uc002axj.2,uc002axk.2,uc002axl.2,uc002axm.2,uc002axn.2,uc010bji.2,uc010bjj.1,uc010bjk.2,uc010ulh.1,uc010uli.1	1.03787	0.0881994
17:66508283:+,17:66511535:+	2.43805	2.04506	10.4531	5.56707e-14	8.62543e-12	20.6197	PRKAR1A	core	NM_212471	ENST00000358598	ARSGandPRKAR1A.hAug10	uc002jhg.2	0.750602	1.68745
12:39087640:+,12:39096677:+	1.04946	3.87331	10.4325	5.94971e-14	9.08538e-12	21.6042	CPNE8	core	NM_153634	ENST00000331366,ENST00000360449,ENST00000538596	CPNE8.aAug10,CPNE8.bAug10,CPNE8.fAug10	uc001rlr.1,uc001rls.1	0.918754	0.130702
1:156236171:+,1:156236332:+	1.17653	3.36148	10.4183	6.22982e-14	9.44783e-12	21.5408	SMG5	core	NM_015327	ENST00000361813	SMG5.aAug10	uc001foc.3	1.08943	0.0870983
15:89657055:+,15:89659553:+	1.17257	3.56215	10.4066	6.4699e-14	9.75292e-12	21.5036	ABHD2	core	NM_007011,NM_152924	ENST00000352732,ENST00000355100	ABHD2.aAug10,ABHD2.bAug10,ABHD2.dAug10,ABHD2.fAug10,ABHD2.hAug10,ABHD2.iAug10,ABHD2.mAug10,ABHD2.nAug10,ABHD2.oAug10,ABHD2.pAug10	uc002bnj.2,uc002bnk.2,uc010ups.1	1.35802	-0.185443
12:71033057:+,12:71050484:+	1.38002	2.65632	10.3944	6.72982e-14	1.00992e-11	21.3722	PTPRR	core	NM_001207015,NM_001207016,NM_002849,NM_130846	ENST00000283228,ENST00000342084,ENST00000378778,ENST00000440835,ENST00000537619,ENST00000547752,ENST00000549107,ENST00000549308	PTPRR.aAug10,PTPRR.bAug10,PTPRR.cAug10,PTPRR.dAug10,PTPRR.eAug10,PTPRR.gAug10,PTPRR.iAug10,PTPRR.jAug10	uc001swf.1,uc001swg.1,uc001swh.1,uc001swi.1,uc009zrs.2,uc010stq.1	1.25745	0.122575
5:57754919:+,5:57755517:+	2.64021	1.95095	10.3827	6.98863e-14	1.04251e-11	20.0388	PLK2	core	NM_001252226,NM_006622	ENST00000274289,ENST00000442330,ENST00000504196,ENST00000514306,ENST00000537944	PLK2.aAug10,PLK2.cAug10,PLK2.fAug10,PLK2.iAug10	uc003jrn.2	2.48928	0.150931
12:111885023:+,12:111885134:+	1.81997	2.24444	10.3778	7.10013e-14	1.05757e-11	20.95	SH2B3	core	NM_005475	ENST00000341259,ENST00000538307,ENST00000551001	SH2B3.aAug10,SH2B3.bAug10,SH2B3.cAug10	uc001tse.2,uc001tsf.2,uc010syf.1,uc010syg.1	1.94013	-0.120166
7:45023645:+,7:45023956:+	1.16421	3.5056	10.3483	7.81346e-14	1.15354e-11	21.3295	C7orf40	core	NR_003697	None	C7orf40andSNORA9.eAug10,C7orf40andSNORA9.fAug10,C7orf40andSNORA9.hAug10	uc003tml.3	1.20058	-0.0363711
21:40189015:+,21:40190349:+	2.04484	1.83767	10.3401	8.023e-14	1.18099e-11	20.6025	ETS2	core	NM_001256295,NM_005239	ENST00000360214,ENST00000360938,ENST00000456966	ETS2.aAug10,ETS2.bAug10,ETS2.cAug10	uc002yxf.2,uc002yxg.2	1.78155	0.263288
1:156230417:+,1:156231124:+	1.18417	3.32161	10.3387	8.0585e-14	1.18448e-11	21.2875	SMG5	core	NM_015327	ENST00000361813	SMG5.aAug10,SMG5.bAug10,SMG5.cAug10,SMG5.eAug10	uc001foc.3,uc009wrv.2	1.08943	0.0947354
1:99418876:+,1:99422165:+	1.19659	3.25605	10.2916	9.38923e-14	1.36408e-11	21.1327	LPPR5	core	NM_001010861,NM_001037317	ENST00000263177,ENST00000370188	LPPR5.aAug10,LPPR5.bAug10	uc001dsb.2,uc001dsc.2	1.16999	0.0265997
8:75757495:+,8:75757617:+	2.44694	0.674266	10.2906	9.42061e-14	1.36666e-11	19.8678	PI15	core	NM_015886	ENST00000260113,ENST00000523773	PI15.aAug10,PI15.bAug10	uc003yal.2,uc003yam.2	2.34316	0.103775
10:90697999:+,10:90699264:+	3.38977	1.43206	10.266	1.02027e-13	1.46318e-11	18.2865	ACTA2	core	NM_001141945,NM_001613	ENST00000224784,ENST00000458208,ENST00000544901	ACTA2.aAug10,ACTA2.bAug10,ACTA2.cAug10,ACTA2.fAug10,ACTA2.hAug10,ACTA2.nAug10,ACTA2.rAug10	uc001kfp.2,uc001kfq.2,uc010qmy.1	3.50692	-0.117155
10:90707143:+,10:90708559:+	2.99809	1.4279	10.2399	1.11062e-13	1.5882e-11	18.7074	ACTA2	core	NM_001141945,NM_001613	ENST00000224784,ENST00000415557,ENST00000458159,ENST00000458208,ENST00000480297,ENST00000488967	ACTA2.aAug10,ACTA2.bAug10,ACTA2.cAug10,ACTA2.dAug10,ACTA2.fAug10,ACTA2.gAug10,ACTA2.iAug10,ACTA2.jAug10,ACTA2.kAug10,ACTA2.rAug10	uc001kfp.2,uc001kfq.2,uc010qmz.1	3.50692	-0.508833
21:40190570:+,21:40191427:+	1.86007	2.04899	10.2283	1.15359e-13	1.64495e-11	20.4434	ETS2	core	NM_001256295,NM_005239	ENST00000360214,ENST00000360938	ETS2.aAug10,ETS2.bAug10,ETS2.iAug10	uc002yxf.2,uc002yxg.2	1.78155	0.0785203
21:40193628:+,21:40194598:+	1.9071	2.16397	10.2123	1.21494e-13	1.72263e-11	20.4115	ETS2	core	NM_001256295,NM_005239	ENST00000360214,ENST00000360938	ETS2.aAug10,ETS2.bAug10	uc002yxf.2,uc002yxg.2	1.78155	0.125551
12:71158558:+,12:71286459:+	1.28037	2.97648	10.2066	1.23801e-13	1.74793e-11	20.8287	PTPRR	core	NM_002849	ENST00000283228	PTPRR.aAug10	uc001swi.1	1.25745	0.0229199
5:57752416:+,5:57752772:+	3.12178	1.61814	10.1972	1.27656e-13	1.79478e-11	18.4636	PLK2	core	NM_001252226,NM_006622	ENST00000274289,ENST00000442330,ENST00000502671,ENST00000503713	PLK2.aAug10,PLK2.bAug10,PLK2.cAug10	uc003jrn.2	2.48928	0.632497
5:112418705:+,5:112419798:+	1.18708	3.38596	10.1664	1.41142e-13	1.96782e-11	20.7341	MCC	core	NM_001085377,NM_002387	ENST00000302475,ENST00000408903,ENST00000514701,ENST00000515367	MCC.aAug10,MCC.bAug10,MCC.cAug10,MCC.dAug10,MCC.eAug10,MCC.fAug10	uc003kqj.3,uc003kqk.3,uc003kql.3,uc010jcd.1,uc011cwb.1	1.22735	-0.0402785
13:36239323:+,13:36241511:+	1.06763	3.43948	10.1653	1.41629e-13	1.96913e-11	20.7505	MIR548F5,NBEA	core	NM_001204197,NM_015678	ENST00000310336,ENST00000379922,ENST00000379939,ENST00000400445,ENST00000402346,ENST00000422518,ENST00000537702,ENST00000540320	NBEA.aAug10,NBEA.bAug10,NBEA.cAug10,NBEA.eAug10	uc001uvb.2,uc001uvd.2,uc010abi.2,uc010tef.1	0.941396	0.126234
5:57750601:+,5:57750738:+	2.28337	1.98363	10.1549	1.46537e-13	2.02334e-11	19.6792	PLK2	core	NM_001252226,NM_006622	ENST00000274289,ENST00000511326	PLK2.aAug10,PLK2.kAug10	uc003jrn.2	2.48928	-0.205904
5:57754355:+,5:57754552:+	2.13562	2.23699	10.1296	1.59116e-13	2.182e-11	19.8977	PLK2	core	NM_001252226,NM_006622	ENST00000274289,ENST00000442330,ENST00000508300,ENST00000509555,ENST00000515415,ENST00000537944	PLK2.aAug10,PLK2.bAug10,PLK2.cAug10,PLK2.dAug10,PLK2.iAug10,PLK2.jAug10	uc003jrn.2,uc011cql.1	2.48928	-0.353663
12:115114275:+,12:115115385:+	1.17966	3.47937	10.1163	1.6621e-13	2.27306e-11	20.5773	TBX3	core	NM_005996,NM_016569	ENST00000257566,ENST00000349155,ENST00000361100	TBX3.aAug10,TBX3.bAug10	uc001tvt.1,uc001tvu.1	1.07314	0.106522
7:80418844:+,7:80427408:+	3.01872	0.806395	10.1146	1.67135e-13	2.2826e-11	18.3281	SEMA3C	core	NM_006379	ENST00000265361,ENST00000419255,ENST00000544525	SEMA3C.aAug10,SEMA3C.bAug10	uc003uhj.2,uc011kgw.1	2.72675	0.291974
3:111730712:+,3:111732257:+	1.62104	2.13958	10.0999	1.75373e-13	2.37722e-11	20.2637	TAGLN3	core	NM_001008272,NM_001008273,NM_013259	ENST00000273368,ENST00000393917,ENST00000455401,ENST00000478951,ENST00000486460,ENST00000540095	TAGLN3.aAug10,TAGLN3.bAug10,TAGLN3.cAug10,TAGLN3.dAug10	uc003dyl.2,uc003dym.2,uc003dyn.2,uc003dyo.2	1.45384	0.167199
21:40186905:+,21:40188932:+	2.05303	1.82407	10.0668	1.95432e-13	2.62708e-11	19.7619	ETS2	core	NM_001256295,NM_005239	ENST00000360214,ENST00000360938,ENST00000456966	ETS2.aAug10,ETS2.bAug10,ETS2.cAug10,ETS2.dAug10	uc002yxf.2,uc002yxg.2	1.78155	0.271479
1:153516399:+,1:153517130:+	1.22783	3.03217	10.0617	1.98693e-13	2.65571e-11	20.3902	S100A4	core	NM_002961,NM_019554	ENST00000354332,ENST00000368714,ENST00000368715,ENST00000368716,ENST00000481009,ENST00000545360	S100A3andS100A4.bAug10,S100A3andS100A4.cAug10,S100A3andS100A4.fAug10,S100A3andS100A4.gAug10,S100A3andS100A4.hAug10,S100A3andS100A4.jAug10,S100A3andS100A4.lAug10,S100A3andS100A4.mAug10,S100A3andS100A4.nAug10	uc001fby.2,uc001fbz.2	1.30855	-0.0807245
17:79977570:+,17:79977734:+	1.65359	1.96135	10.0539	2.03825e-13	2.71705e-11	20.1342	STRA13	extended	None	ENST00000392359	STRA13.bAug10,STRA13.dAug10,STRA13.eAug10,STRA13.fAug10,STRA13.gAug10,STRA13.lAug10,STRA13.mAug10	None	-0.0416531	1.69524
13:80911891:+,13:80914757:+	1.07274	3.93656	10.0531	2.04345e-13	2.71872e-11	20.3933	SPRY2	core	NM_005842	ENST00000377104	SPRY2.dAug10	uc001vlj.2	1.07383	-0.00108279
19:4280357:+,19:4282867:+	1.1156	3.53868	10.0529	2.04492e-13	2.71872e-11	20.3921	SHD	core	NM_020209	ENST00000221852,ENST00000543264	SHD.aAug10,SHD.bAug10	uc002lzw.2,uc010dtu.2	1.14462	-0.0290259
8:29194928:+,8:29195799:+	1.19722	3.4534	10.0441	2.10475e-13	2.77982e-11	20.3575	DUSP4	core	NM_001394,NM_057158	ENST00000240100,ENST00000240101	DUSP4.aAug10,DUSP4.bAug10	uc003xhl.2,uc003xhm.2	1.36906	-0.171842
12:71155406:+,12:71158445:+	1.32115	2.81091	10.0359	2.16244e-13	2.85225e-11	20.2657	PTPRR	core	NM_001207015,NM_002849	ENST00000283228,ENST00000342084	PTPRR.aAug10,PTPRR.bAug10	uc001swi.1,uc010stq.1	1.25745	0.0637019
1:156236469:+,1:156237261:+	1.09409	3.50523	10.0323	2.18818e-13	2.88241e-11	20.3243	SMG5	core	NM_015327	ENST00000361813,ENST00000489907	SMG5.aAug10,SMG5.dAug10	uc001foc.3	1.08943	0.00465733
9:131150176:+,9:131151540:+	1.05454	3.43896	10.0271	2.22535e-13	2.9237e-11	20.309	URM1	core	NM_001135947,NM_030914	ENST00000372853,ENST00000452446,ENST00000470840,ENST00000483206	URM1.aAug10,URM1.bAug10,URM1.cAug10,URM1.dAug10,URM1.gAug10	uc004buv.2,uc004buw.2,uc011may.1	1.07039	-0.0158469
16:58543093:+,16:58543205:+	1.45218	2.47882	10.0223	2.26059e-13	2.96223e-11	20.1403	NDRG4	core	NM_001130487,NM_001242833,NM_001242834,NM_001242835,NM_001242836,NM_020465,NM_022910,NR_040072	ENST00000258187,ENST00000356752,ENST00000394279,ENST00000394282,ENST00000421602	NDRG4.aAug10,NDRG4.bAug10,NDRG4.cAug10,NDRG4.dAug10,NDRG4.eAug10,NDRG4.fAug10,NDRG4.gAug10,NDRG4.hAug10,NDRG4.iAug10,NDRG4.jAug10,NDRG4.nAug10,NDRG4.vmAug10,NDRG4.vnAug10	uc002enk.2,uc002enm.2,uc002eno.2,uc002enp.2,uc010cdk.2,uc010vif.1,uc010vig.1,uc010vih.1,uc010vii.1	1.2716	0.180573
5:57754668:+,5:57754812:+	2.03554	2.22918	10.0047	2.39481e-13	3.13402e-11	19.5649	PLK2	core	NM_001252226,NM_006622	ENST00000274289,ENST00000442330,ENST00000508300,ENST00000514306,ENST00000515415,ENST00000537944	PLK2.aAug10,PLK2.bAug10,PLK2.dAug10,PLK2.fAug10,PLK2.iAug10,PLK2.jAug10	uc003jrn.2,uc011cql.1	2.48928	-0.453738
5:83433172:+,5:83476211:+	1.11902	3.3632	9.9959	2.46531e-13	3.21787e-11	20.2006	EDIL3	core	NM_005711	ENST00000296591,ENST00000380138,ENST00000507663	EDIL3.aAug10,EDIL3.cAug10,EDIL3.dAug10	uc003kio.1,uc003kip.1	1.26206	-0.14304
20:48263615:+,20:48273105:+	1.08662	3.69302	9.99156	2.50071e-13	3.25983e-11	20.191	B4GALT5	core	NM_004776	ENST00000371711	B4GALT5.aAug10,B4GALT5.bAug10,B4GALT5.gAug10	uc002xuu.3	1.23294	-0.146321
7:80430142:+,7:80431981:+	2.72369	0.945027	9.99113	2.5042e-13	3.26014e-11	18.3922	SEMA3C	core	NM_006379	ENST00000265361,ENST00000419255,ENST00000458729,ENST00000536800,ENST00000544525	SEMA3C.aAug10,SEMA3C.bAug10,SEMA3C.cAug10	uc003uhj.2,uc011kgw.1,uc011kgx.1	2.72675	-0.00306343
7:80458061:+,7:80545995:+	2.64833	1.18424	9.98244	2.5767e-13	3.33289e-11	18.8588	SEMA3C	core	NM_006379	ENST00000265361,ENST00000419255,ENST00000544525	SEMA3C.aAug10,SEMA3C.bAug10,SEMA3C.eAug10	uc003uhj.2,uc011kgw.1	2.72675	-0.0784199
10:23393173:+,10:23399171:+	1.095	3.38774	9.96591	2.72044e-13	3.50075e-11	20.1117	MSRB2	core	NM_012228	ENST00000376510,ENST00000472663	MSRB2.bAug10,MSRB2.cAug10,MSRB2.eAug10,MSRB2.fAug10	uc001iro.2	0.982827	0.112173
5:112419887:+,5:112420861:+	1.21912	3.22074	9.96545	2.7246e-13	3.5016e-11	20.0776	MCC	core	NM_001085377,NM_002387	ENST00000302475,ENST00000408903,ENST00000514701,ENST00000515367	MCC.aAug10,MCC.bAug10,MCC.cAug10,MCC.dAug10,MCC.eAug10,MCC.fAug10	uc003kqj.3,uc003kqk.3,uc003kql.3,uc010jcd.1,uc011cwb.1	1.22735	-0.00823018
6:134494292:+,6:134494412:+	1.31079	3.25996	9.96335	2.74349e-13	3.51686e-11	20.0305	SGK1	core	NM_001143676,NM_001143677,NM_001143678,NM_005627	ENST00000237305,ENST00000367855,ENST00000367857,ENST00000367858,ENST00000413996,ENST00000475882,ENST00000489458,ENST00000524387,ENST00000528577,ENST00000531575,ENST00000534658	SGK1.aAug10,SGK1.bAug10,SGK1.cAug10,SGK1.dAug10,SGK1.eAug10,SGK1.gAug10,SGK1.hAug10,SGK1.iAug10,SGK1.jAug10,SGK1.kAug10,SGK1.mAug10,SGK1.nAug10,SGK1.qAug10,SGK1.tAug10	uc003qen.3,uc003qeo.3,uc011ect.1,uc011ecv.1,uc011ecw.1	1.11953	0.19126
5:112379327:+,5:112384790:+	1.41074	2.70914	9.94147	2.94804e-13	3.75984e-11	19.9144	MCC	core	NM_001085377,NM_002387	ENST00000302475,ENST00000408903,ENST00000515367	MCC.aAug10,MCC.bAug10,MCC.cAug10,MCC.eAug10	uc003kqj.3,uc003kqk.3,uc003kql.3	1.22735	0.183386
12:42860182:+,12:42862428:+	1.78482	1.74281	9.93612	3.00043e-13	3.82179e-11	19.642	PRICKLE1	core	NM_001144881,NM_001144882,NM_001144883,NM_153026	ENST00000345127,ENST00000445766,ENST00000455697,ENST00000548696,ENST00000552240	PRICKLE1.aAug10,PRICKLE1.bAug10,PRICKLE1.cAug10,PRICKLE1.dAug10	uc001rnl.2,uc001rnm.2,uc010skv.1,uc010skw.1	1.51598	0.268839
7:80374623:+,7:80378214:+	2.71138	0.802944	9.89552	3.42943e-13	4.29098e-11	18.1662	SEMA3C	core	NM_006379	ENST00000265361,ENST00000419255,ENST00000544525	SEMA3C.aAug10,SEMA3C.bAug10,SEMA3C.dAug10	uc003uhj.2,uc011kgw.1	2.72675	-0.0153738
1:99358660:+,1:99380357:+	1.28079	2.84252	9.88767	3.51937e-13	4.37712e-11	19.8012	LPPR5	core	NM_001010861	ENST00000370188	LPPR5.bAug10	uc001dsc.2	1.16999	0.110794
12:57486978:+,12:57487190:+	2.28826	1.77798	9.87641	3.65243e-13	4.52017e-11	18.8394	NAB2	core	NM_005967	ENST00000300131,ENST00000357680	NAB2.aAug10	uc001smz.2	2.20419	0.0840722
5:112363179:+,5:112364631:+	1.18323	3.41818	9.86455	3.79804e-13	4.68304e-11	19.7732	MCC	core	NM_001085377,NM_002387	ENST00000302475,ENST00000408903,ENST00000515367	MCC.aAug10,MCC.bAug10,MCC.cAug10,MCC.lAug10	uc003kqj.3,uc003kql.3	1.22735	-0.0441287
5:83402648:+,5:83433059:+	1.15567	3.24039	9.85338	3.94061e-13	4.8469e-11	19.7381	EDIL3	core	NM_005711	ENST00000296591,ENST00000380138,ENST00000507663	EDIL3.aAug10,EDIL3.cAug10,EDIL3.dAug10	uc003kio.1,uc003kip.1	1.26206	-0.106393
15:74481618:+,15:74483181:+	1.20093	3.14147	9.8077	4.58224e-13	5.52758e-11	19.5821	STRA6	core	NM_001142617,NM_001142618,NM_001142619,NM_001199040,NM_001199041,NM_001199042,NM_022369	ENST00000323940,ENST00000395105,ENST00000416286,ENST00000423167,ENST00000449139,ENST00000535552,ENST00000536129,ENST00000545137	STRA6.aAug10,STRA6.bAug10,STRA6.cAug10,STRA6.dAug10,STRA6.eAug10,STRA6.fAug10,STRA6.gAug10,STRA6.hAug10,STRA6.iAug10,STRA6.kAug10,STRA6.lAug10,STRA6.mAug10,STRA6.nAug10	uc002axi.2,uc002axj.2,uc002axk.2,uc002axl.2,uc002axm.2,uc002axn.2,uc010bji.2,uc010bjj.1,uc010ulh.1,uc010uli.1	1.03787	0.163058
1:151681553:+,1:151681696:+	2.25325	1.71374	9.80564	4.61361e-13	5.55873e-11	18.8206	CELF3	core	NM_001172648,NM_001172649,NM_007185	ENST00000290583,ENST00000290585,ENST00000368833,ENST00000419910,ENST00000420342,ENST00000470688,ENST00000478829,ENST00000479893	CELF3.aAug10,CELF3.bAug10,CELF3.cAug10,CELF3.dAug10,CELF3.eAug10,CELF3.fAug10,CELF3.gAug10,CELF3.hAug10	uc001eyr.2,uc001eys.1,uc001eyt.2,uc009wmx.1,uc009wmy.2,uc010pdi.1	2.01186	0.241382
12:71056385:+,12:71077907:+	1.28629	3.16737	9.8018	4.67242e-13	5.60906e-11	19.5698	PTPRR	core	NM_001207015,NM_001207016,NM_002849,NM_130846	ENST00000283228,ENST00000342084,ENST00000378778,ENST00000440835,ENST00000548220,ENST00000549107,ENST00000549308	PTPRR.aAug10,PTPRR.bAug10,PTPRR.cAug10,PTPRR.dAug10,PTPRR.eAug10,PTPRR.fAug10,PTPRR.gAug10	uc001swh.1,uc001swi.1,uc009zrs.2,uc010stq.1,uc010str.1	1.25745	0.0288368
8:75756334:+,8:75757363:+	2.35409	0.774741	9.79833	4.72642e-13	5.66064e-11	18.6189	PI15	core	NM_015886	ENST00000260113,ENST00000523773	PI15.aAug10,PI15.bAug10	uc003yal.2,uc003yam.2	2.34316	0.0109308
15:74486263:+,15:74487643:+	1.12643	3.36086	9.77761	5.06162e-13	6.01894e-11	19.4986	STRA6	core	NM_001142617,NM_001142618,NM_001142619,NM_001199040,NM_001199041,NM_001199042,NM_022369	ENST00000323940,ENST00000395105,ENST00000416286,ENST00000423167,ENST00000449139,ENST00000535552,ENST00000536129	STRA6.aAug10,STRA6.bAug10,STRA6.cAug10,STRA6.dAug10,STRA6.eAug10,STRA6.fAug10,STRA6.gAug10,STRA6.hAug10,STRA6.iAug10,STRA6.jAug10,STRA6.kAug10,STRA6.lAug10,STRA6.mAug10	uc002axj.2,uc002axk.2,uc002axl.2,uc002axm.2,uc002axn.2,uc010bji.2,uc010bjj.1,uc010ulh.1,uc010uli.1	1.03787	0.0885587
3:111718449:+,3:111719619:+	1.49565	2.30816	9.77639	5.08215e-13	6.0362e-11	19.3435	TAGLN3	core	NM_001008272,NM_001008273,NM_013259	ENST00000273368,ENST00000393917,ENST00000455401,ENST00000478951,ENST00000540095	TAGLN3.aAug10,TAGLN3.bAug10,TAGLN3.cAug10,TAGLN3.dAug10,TAGLN3.eAug10	uc003dyl.2,uc003dym.2,uc003dyn.2,uc003dyo.2	1.45384	0.0418135
7:80394559:+,7:80418622:+	3.73936	0.446989	9.74829	5.57758e-13	6.57014e-11	15.7148	SEMA3C	core	NM_006379	ENST00000265361,ENST00000419255,ENST00000544525	SEMA3C.aAug10,SEMA3C.bAug10,SEMA3C.dAug10	uc003uhj.2,uc011kgw.1	2.72675	1.01261
5:112421007:+,5:112437436:+	1.50921	2.49733	9.72851	5.95534e-13	6.97415e-11	19.1504	MCC	core	NM_001085377,NM_002387	ENST00000302475,ENST00000408903,ENST00000514701,ENST00000515367	MCC.aAug10,MCC.bAug10,MCC.cAug10,MCC.dAug10,MCC.eAug10,MCC.fAug10	uc003kqj.3,uc003kqk.3,uc003kql.3,uc010jcd.1,uc011cwb.1	1.22735	0.281859
7:24905084:+,7:24905689:+	1.34314	2.51305	9.72655	5.99412e-13	7.01138e-11	19.247	OSBPL3	core	NM_015550,NM_145320,NM_145321,NM_145322	ENST00000313367,ENST00000352860,ENST00000353930,ENST00000396429,ENST00000396431,ENST00000409069,ENST00000409452,ENST00000409555,ENST00000409759,ENST00000409863,ENST00000431825	OSBPL3.aAug10,OSBPL3.bAug10,OSBPL3.cAug10,OSBPL3.dAug10,OSBPL3.eAug10,OSBPL3.fAug10	uc003sxd.2,uc003sxe.2,uc003sxf.2,uc003sxg.2,uc003sxh.2,uc003sxi.2	1.34571	-0.00257232
5:74685512:+,5:74696030:+	1.14708	3.22074	9.72169	6.09151e-13	7.08396e-11	19.3113	COL4A3BP	core	NM_031361	ENST00000261415	COL4A3BP.dAug10,COL4A3BP.eAug10	uc003kds.2	0.797145	0.349932
7:80435074:+,7:80439927:+	2.64574	0.84175	9.72093	6.10671e-13	7.09341e-11	17.7025	SEMA3C	core	NM_006379	ENST00000265361,ENST00000419255,ENST00000458729,ENST00000536800,ENST00000544525	SEMA3C.aAug10,SEMA3C.bAug10,SEMA3C.cAug10	uc003uhj.2,uc011kgw.1,uc011kgx.1	2.72675	-0.0810114
15:89734380:+,15:89736466:+	1.47425	2.81811	9.71888	6.14852e-13	7.13371e-11	19.1858	ABHD2	core	NM_007011,NM_152924	ENST00000352732,ENST00000355100	ABHD2.aAug10,ABHD2.bAug10,ABHD2.eAug10	uc002bnj.2,uc002bnk.2	1.35802	0.11623
16:55735846:+,16:55739128:+	1.94841	0.932256	9.71356	6.25793e-13	7.24388e-11	18.7269	SLC6A2	core	NM_001172504	ENST00000219833	SLC6A2.aAug10	None	1.48384	0.464571
1:156237974:+,1:156238081:+	1.12772	3.28307	9.7104	6.32379e-13	7.31167e-11	19.2769	SMG5	core	NM_015327	ENST00000361813,ENST00000368267	SMG5.aAug10,SMG5.bAug10	uc001foc.3	1.08943	0.0382927
15:89736550:+,15:89738458:+	1.61748	2.54313	9.70947	6.34338e-13	7.32588e-11	19.047	ABHD2	core	NM_007011,NM_152924	ENST00000352732,ENST00000355100	ABHD2.aAug10,ABHD2.bAug10	uc002bnj.2,uc002bnk.2	1.35802	0.259467
8:75757732:+,8:75761353:+	2.35087	0.612324	9.70309	6.47888e-13	7.44804e-11	18.357	PI15	core	NM_015886	ENST00000260113,ENST00000523773	PI15.aAug10,PI15.bAug10	uc003yal.2,uc003yam.2	2.34316	0.00770383
1:246811339:+,1:246823501:+	1.30516	2.50655	9.69849	6.5786e-13	7.55275e-11	19.1963	CNST	core	NM_152609	ENST00000366513	CNST.aAug10,CNST.bAug10,CNST.iAug10	uc001ibp.2	0.632172	0.672993
16:58540518:+,16:58540816:+	1.44686	2.43275	9.69122	6.73912e-13	7.71183e-11	19.0912	NDRG4	core	NM_001130487,NM_001242833,NM_001242834,NM_001242835,NM_001242836,NM_020465,NM_022910,NR_040072	ENST00000258187,ENST00000356752,ENST00000394279,ENST00000394282,ENST00000421602	NDRG4.aAug10,NDRG4.bAug10,NDRG4.cAug10,NDRG4.dAug10,NDRG4.eAug10,NDRG4.fAug10,NDRG4.gAug10,NDRG4.hAug10,NDRG4.iAug10,NDRG4.jAug10,NDRG4.lAug10,NDRG4.nAug10,NDRG4.pAug10,NDRG4.vjAug10,NDRG4.vyAug10	uc002enk.2,uc002enm.2,uc002eno.2,uc002enp.2,uc002enq.1,uc010cdk.2,uc010vif.1,uc010vig.1,uc010vih.1,uc010vii.1	1.2716	0.17525
5:112384996:+,5:112389422:+	1.18458	3.18425	9.6681	7.27696e-13	8.25194e-11	19.1302	MCC	core	NM_001085377,NM_002387	ENST00000302475,ENST00000408903,ENST00000514701,ENST00000515367	MCC.aAug10,MCC.bAug10,MCC.cAug10,MCC.dAug10,MCC.eAug10,MCC.fAug10	uc003kqj.3,uc003kqk.3,uc003kql.3,uc011cwb.1	1.22735	-0.0427744
16:58541768:+,16:58541852:+	1.20924	2.99063	9.66058	7.46083e-13	8.44134e-11	19.1046	NDRG4	core	NM_001130487,NM_001242833,NM_001242834,NM_001242835,NM_001242836,NM_020465,NM_022910,NR_040072	ENST00000258187,ENST00000356752,ENST00000394279,ENST00000394282,ENST00000421602	NDRG4.aAug10,NDRG4.bAug10,NDRG4.cAug10,NDRG4.dAug10,NDRG4.eAug10,NDRG4.fAug10,NDRG4.gAug10,NDRG4.hAug10,NDRG4.iAug10,NDRG4.jAug10,NDRG4.pAug10,NDRG4.vnAug10	uc002enk.2,uc002enm.2,uc002eno.2,uc002enp.2,uc010cdk.2,uc010vif.1,uc010vig.1,uc010vih.1,uc010vii.1	1.2716	-0.0623677
8:27456152:+,8:27457297:+	1.04821	4.03612	9.65745	7.53904e-13	8.51063e-11	19.1072	CLU	core	NM_001831,NR_038335,NR_045494	ENST00000316403,ENST00000380446,ENST00000405140,ENST00000520012,ENST00000521770,ENST00000522098,ENST00000523500,ENST00000546343,ENST00000560366	CLU.aAug10,CLU.bAug10,CLU.cAug10,CLU.dAug10,CLU.eAug10,CLU.gAug10,CLU.iAug10	uc003xfw.1,uc003xfx.1,uc003xfy.1,uc003xfz.1,uc010lux.1	0.746092	0.30212
12:71095103:+,12:71139598:+	1.31015	2.76044	9.65226	7.67017e-13	8.60054e-11	19.0439	PTPRR	core	NM_001207015,NM_001207016,NM_002849,NM_130846	ENST00000283228,ENST00000342084,ENST00000378778,ENST00000440835,ENST00000548220,ENST00000549308,ENST00000550661	PTPRR.aAug10,PTPRR.bAug10,PTPRR.cAug10,PTPRR.dAug10,PTPRR.eAug10,PTPRR.fAug10	uc001swh.1,uc001swi.1,uc009zrs.2,uc010stq.1,uc010str.1	1.25745	0.0527015
3:165504099:+,3:165555102:+	1.18215	3.00951	9.65107	7.70052e-13	8.6057e-11	19.0746	BCHE	extended	None	ENST00000479451,ENST00000488954,ENST00000540653	BCHE.dAug10,BCHE.eAug10	uc003fen.3	0.434326	0.747824
15:89728747:+,15:89731424:+	1.19386	3.46034	9.62703	8.34113e-13	9.19855e-11	19.0073	ABHD2	core	NM_007011,NM_152924	ENST00000352732,ENST00000355100	ABHD2.aAug10,ABHD2.bAug10,ABHD2.eAug10	uc002bnj.2,uc002bnk.2	1.35802	-0.16416
10:90699455:+,10:90700986:+	3.43601	1.16435	9.62493	8.39968e-13	9.23265e-11	16.2153	ACTA2	core	NM_001141945,NM_001613	ENST00000224784,ENST00000458208,ENST00000544901	ACTA2.aAug10,ACTA2.bAug10,ACTA2.cAug10,ACTA2.fAug10,ACTA2.rAug10	uc001kfp.2,uc001kfq.2,uc010qmy.1	3.50692	-0.0709172
6:137525641:+,6:137527273:+	1.38431	2.77399	9.62043	8.52638e-13	9.36165e-11	18.8816	IFNGR1	core	NM_000416	ENST00000367735,ENST00000367739,ENST00000414770,ENST00000418947,ENST00000458076,ENST00000543628	IFNGR1.aAug10,IFNGR1.bAug10,IFNGR1.cAug10,IFNGR1.eAug10,IFNGR1.fAug10,IFNGR1.gAug10,IFNGR1.hAug10,IFNGR1.jAug10	uc003qho.2,uc011edm.1,uc011edn.1	1.39876	-0.0144465
21:19169435:+,21:19190509:+	1.3508	2.73032	9.60103	9.0951e-13	9.92089e-11	18.8434	C21orf91	core	NM_001100420,NM_001100421,NM_017447	ENST00000284881,ENST00000400558,ENST00000400559,ENST00000405964	C21orf91.aAug10,C21orf91.bAug10,C21orf91.cAug10,C21orf91.dAug10	uc002yko.3,uc002ykp.3,uc002ykq.3	1.41769	-0.0668888
13:37539863:+,13:37546114:+	1.02581	3.69877	9.5908	9.41013e-13	1.01759e-10	18.8967	ALG5	core	NM_001142364,NM_013338	ENST00000239891,ENST00000443765	ALG5.aAug10,ALG5.bAug10,ALG5.dAug10,ALG5.fAug10,ALG5.gAug10,ALG5.iAug10,ALG5.jAug10	uc001uvy.2,uc010teq.1	1.07114	-0.0453288
7:100808144:+,7:100808267:+	3.17743	1.81553	9.57555	9.90055e-13	1.06717e-10	17.2697	VGF	extended	None	ENST00000445482	None	None	1.91424	1.26319
1:156247032:+,1:156247716:+	1.06822	3.34009	9.56507	1.02525e-12	1.10038e-10	18.8106	SMG5	core	NM_015327	ENST00000361813,ENST00000368267	SMG5.aAug10	uc001foc.3	1.08943	-0.0212069
13:36223984:+,13:36225942:+	1.02825	3.52234	9.54204	1.10709e-12	1.18199e-10	18.7372	MIR548F5,NBEA	core	NM_001204197,NM_015678	ENST00000310336,ENST00000379922,ENST00000379939,ENST00000400445,ENST00000402346,ENST00000422518,ENST00000537702,ENST00000540320,ENST00000543274	NBEA.aAug10,NBEA.bAug10,NBEA.cAug10,NBEA.dAug10,NBEA.eAug10,NBEA.iAug10	uc001uvb.2,uc001uvd.2,uc010abi.2,uc010tee.1,uc010tef.1	0.941396	0.0868575
6:134494704:+,6:134495143:+	1.03112	3.93247	9.51816	1.19891e-12	1.26376e-10	18.6595	SGK1	core	NM_001143676,NM_001143677,NM_001143678,NM_005627	ENST00000237305,ENST00000367855,ENST00000367857,ENST00000367858,ENST00000413996,ENST00000461976,ENST00000475719,ENST00000475882,ENST00000489458,ENST00000490149,ENST00000524387,ENST00000528577,ENST00000531575,ENST00000532021,ENST00000532856,ENST00000534658	SGK1.aAug10,SGK1.bAug10,SGK1.cAug10,SGK1.dAug10,SGK1.eAug10,SGK1.fAug10,SGK1.gAug10,SGK1.hAug10,SGK1.iAug10,SGK1.jAug10,SGK1.kAug10,SGK1.lAug10,SGK1.nAug10,SGK1.oAug10,SGK1.qAug10,SGK1.rAug10,SGK1.tAug10,SGK1.vdAug10	uc003qen.3,uc003qeo.3,uc011ect.1,uc011ecu.1,uc011ecv.1,uc011ecw.1	1.11953	-0.0884108
7:121003001:+,7:121004184:+	1.02705	3.50907	9.51693	1.20385e-12	1.26763e-10	18.6556	FAM3C	core	NM_001040020,NM_014888	ENST00000359943,ENST00000412653,ENST00000426156,ENST00000497622	FAM3C.aAug10,FAM3C.bAug10,FAM3C.cAug10,FAM3C.dAug10,FAM3C.kAug10	uc003vjx.2,uc010lkm.2	1.05921	-0.032157
1:155227448:+,1:155228617:+	1.16581	3.17579	9.50542	1.25104e-12	1.31044e-10	18.6001	SCAMP3	core	NM_005698,NM_052837	ENST00000302631,ENST00000355379,ENST00000465312,ENST00000472397,ENST00000490999	SCAMP3.aAug10,SCAMP3.bAug10,SCAMP3.cAug10,SCAMP3.dAug10,SCAMP3.eAug10,SCAMP3.fAug10,SCAMP3.hAug10,SCAMP3.kAug10,SCAMP3.lAug10,SCAMP3.mAug10,SCAMP3.pAug10,SCAMP3.qAug10	uc001fjr.2,uc001fjs.2,uc001fjt.2,uc001fju.2,uc001fjv.2	0.960274	0.205538
11:26495675:+,11:26529651:+	6.94789	-2.45874	9.4989	1.27858e-12	1.33511e-10	8.88297	ANO3	extended	None	ENST00000531568	ANO3.cAug10	uc010rdt.1	5.45906	1.48883
5:112403880:+,5:112406791:+	1.21631	3.2045	9.47985	1.36261e-12	1.40528e-10	18.5219	MCC	core	NM_001085377,NM_002387	ENST00000302475,ENST00000408903,ENST00000514701,ENST00000515367	MCC.aAug10,MCC.bAug10,MCC.cAug10,MCC.dAug10,MCC.eAug10,MCC.fAug10	uc003kqj.3,uc003kqk.3,uc003kql.3,uc011cwb.1	1.22735	-0.0110448
16:55690264:+,16:55690556:+	1.64541	1.79133	9.47793	1.3714e-12	1.41e-10	18.2701	SLC6A2	extended	None	None	tatema.cAug10	None	1.48384	0.161566
1:156247839:+,1:156248727:+	1.10662	3.20335	9.45267	1.49226e-12	1.51714e-10	18.4395	SMG5	core	NM_015327	ENST00000361813,ENST00000368267	SMG5.aAug10	uc001foc.3	1.08943	0.0171896
5:52235521:+,5:52235670:+	1.12585	2.90866	9.45078	1.50175e-12	1.52524e-10	18.4279	ITGA1	core	NM_181501	ENST00000282588,ENST00000504669,ENST00000506275	PELOandITGA1andRPL17P21.aAug10,PELOandITGA1andRPL17P21.bAug10,PELOandITGA1andRPL17P21.cAug10,PELOandITGA1andRPL17P21.fAug10	uc003jou.2,uc003jov.2,uc003jow.2	0.922298	0.203549
6:64289236:+,6:64289962:+	1.13286	3.3819	9.44616	1.52515e-12	1.54572e-10	18.4136	PTP4A1	core	NM_003463	ENST00000370651	PTP4A1.aAug10,PTP4A1.bAug10,PTP4A1.gAug10	uc003pek.2,uc003pel.2	1.07253	0.060328
3:97506963:+,3:97516868:+	1.93906	1.50303	9.44213	1.54586e-12	1.56371e-10	17.8229	ARL6	extended	None	ENST00000476753	ARL6.iAug10	None	0.988568	0.950493
16:58541903:+,16:58542866:+	1.12763	3.12401	9.44014	1.55621e-12	1.57165e-10	18.396	NDRG4	core	NM_001130487,NM_001242833,NM_001242834,NM_001242835,NM_001242836,NM_020465,NM_022910,NR_040072	ENST00000258187,ENST00000356752,ENST00000394279,ENST00000394282,ENST00000421602	NDRG4.aAug10,NDRG4.bAug10,NDRG4.cAug10,NDRG4.dAug10,NDRG4.eAug10,NDRG4.fAug10,NDRG4.gAug10,NDRG4.hAug10,NDRG4.iAug10,NDRG4.jAug10,NDRG4.nAug10,NDRG4.vmAug10,NDRG4.vnAug10	uc002enk.2,uc002enm.2,uc002eno.2,uc002enp.2,uc010cdk.2,uc010vif.1,uc010vig.1,uc010vih.1,uc010vii.1	1.2716	-0.143975
10:28966902:+,10:28970187:+	1.27832	2.95655	9.43992	1.55736e-12	1.57165e-10	18.3522	BAMBI	core	NM_012342	ENST00000375533,ENST00000497699,ENST00000542444	BAMBI.aAug10,BAMBI.cAug10	uc001iui.2,uc001iuj.1	1.28339	-0.00506394
10:23399247:+,10:23408233:+	1.05682	3.19606	9.40459	1.75298e-12	1.74159e-10	18.2869	MSRB2	core	NM_012228	ENST00000376510	MSRB2.bAug10,MSRB2.cAug10	uc001iro.2	0.982827	0.0739923
4:119727109:+,4:119736183:+	1.31789	2.67344	9.40189	1.76894e-12	1.7557e-10	18.2175	SEC24D	core	NM_014822	ENST00000280551,ENST00000379735,ENST00000419654,ENST00000506622,ENST00000509818,ENST00000514561	SEC24D.aAug10,SEC24D.bAug10,SEC24D.cAug10,SEC24D.eAug10,SEC24D.gAug10,SEC24D.hAug10,SEC24D.jAug10	uc003ici.3,uc003icj.3,uc003icl.2,uc010imz.1,uc011cgg.1	1.08439	0.233495
11:26569097:+,11:26574796:+	6.86618	-2.27006	9.39612	1.80349e-12	1.78645e-10	8.72124	ANO3	core	NM_031418	ENST00000256737,ENST00000525139,ENST00000529242,ENST00000531568,ENST00000537978,ENST00000538001	ANO3.aAug10,ANO3.bAug10,ANO3.cAug10,ANO3.eAug10	uc001mqt.3,uc010rdr.1,uc010rds.1,uc010rdt.1	5.45906	1.40713
7:24905856:+,7:24910351:+	1.51922	2.20563	9.38246	1.88801e-12	1.85916e-10	18.0487	OSBPL3	core	NM_015550,NM_145320,NM_145321,NM_145322	ENST00000313367,ENST00000352860,ENST00000353930,ENST00000396429,ENST00000396431,ENST00000409069,ENST00000409452,ENST00000409555,ENST00000409759,ENST00000409863,ENST00000431825	OSBPL3.aAug10,OSBPL3.bAug10,OSBPL3.cAug10,OSBPL3.dAug10,OSBPL3.eAug10,OSBPL3.fAug10	uc003sxd.2,uc003sxe.2,uc003sxf.2,uc003sxg.2,uc003sxh.2,uc003sxi.2	1.34571	0.173511
10:90703664:+,10:90707015:+	3.88965	1.21464	9.37926	1.90835e-12	1.87734e-10	15.3733	ACTA2	core	NM_001141945,NM_001613	ENST00000224784,ENST00000415557,ENST00000458159,ENST00000458208,ENST00000480297,ENST00000544901	ACTA2.aAug10,ACTA2.bAug10,ACTA2.cAug10,ACTA2.dAug10,ACTA2.fAug10,ACTA2.gAug10,ACTA2.iAug10	uc001kfp.2,uc001kfq.2,uc010qmy.1,uc010qmz.1	3.50692	0.382724
X:70549072:+,X:70803855:+	1.11181	3.89018	9.37383	1.94344e-12	1.90998e-10	18.1867	ACRC,BCYRN1	core	NR_001568	None	None	None	0.988676	0.123133
6:134493912:+,6:134494161:+	1.19807	3.37011	9.36269	2.0175e-12	1.97502e-10	18.127	SGK1	core	NM_001143676,NM_001143677,NM_001143678,NM_005627	ENST00000237305,ENST00000367855,ENST00000367857,ENST00000367858,ENST00000413996,ENST00000475882,ENST00000489458,ENST00000524764,ENST00000528577,ENST00000534658	SGK1.aAug10,SGK1.bAug10,SGK1.cAug10,SGK1.dAug10,SGK1.eAug10,SGK1.gAug10,SGK1.hAug10,SGK1.iAug10,SGK1.jAug10,SGK1.kAug10,SGK1.mAug10,SGK1.oAug10	uc003qen.3,uc003qeo.3,uc011ect.1,uc011ecv.1,uc011ecw.1	1.11953	0.078542
15:89698765:+,15:89719043:+	1.29435	2.90908	9.35514	2.06925e-12	2.0178e-10	18.064	ABHD2	core	NM_007011,NM_152924	ENST00000352732,ENST00000355100	ABHD2.aAug10,ABHD2.bAug10,ABHD2.cAug10	uc002bnj.2,uc002bnk.2	1.35802	-0.0636645
15:89719226:+,15:89728655:+	1.3397	2.84816	9.33836	2.18916e-12	2.11924e-10	17.9963	ABHD2	core	NM_007011,NM_152924	ENST00000352732,ENST00000355100	ABHD2.aAug10,ABHD2.bAug10	uc002bnj.2,uc002bnk.2	1.35802	-0.0183146
6:134494495:+,6:134494600:+	1.25242	3.23239	9.31638	2.35703e-12	2.2632e-10	17.9562	SGK1	core	NM_001143676,NM_001143677,NM_001143678,NM_005627	ENST00000237305,ENST00000367855,ENST00000367857,ENST00000367858,ENST00000413996,ENST00000475719,ENST00000475882,ENST00000489458,ENST00000490149,ENST00000524387,ENST00000528577,ENST00000531575,ENST00000532021,ENST00000532856	SGK1.aAug10,SGK1.bAug10,SGK1.cAug10,SGK1.dAug10,SGK1.eAug10,SGK1.fAug10,SGK1.gAug10,SGK1.hAug10,SGK1.iAug10,SGK1.jAug10,SGK1.lAug10,SGK1.mAug10,SGK1.nAug10,SGK1.oAug10,SGK1.qAug10,SGK1.rAug10,SGK1.tAug10,SGK1.vdAug10	uc003qen.3,uc003qeo.3,uc011ect.1,uc011ecu.1,uc011ecv.1,uc011ecw.1	1.11953	0.132894
1:156233361:+,1:156235572:+	1.17512	2.93491	9.31014	2.407e-12	2.30482e-10	17.9559	SMG5	core	NM_015327	ENST00000361813	SMG5.aAug10,SMG5.bAug10	uc001foc.3,uc009wrv.2	1.08943	0.085689
5:52206249:+,5:52211294:+	1.12969	2.91295	9.28946	2.58036e-12	2.45413e-10	17.8978	ITGA1	core	NM_181501	ENST00000282588,ENST00000504669	PELOandITGA1andRPL17P21.aAug10,PELOandITGA1andRPL17P21.bAug10,PELOandITGA1andRPL17P21.cAug10	uc003jou.2,uc003jov.2,uc003jow.2	0.922298	0.207389
6:137524822:+,6:137525469:+	1.40905	2.67321	9.26364	2.81458e-12	2.63933e-10	17.7074	IFNGR1	core	NM_000416	ENST00000367739,ENST00000418947,ENST00000458076,ENST00000543628	IFNGR1.aAug10,IFNGR1.bAug10,IFNGR1.cAug10	uc003qho.2,uc011edm.1	1.39876	0.0102958
3:159584070:+,3:159609886:+	1.0284	2.87806	9.22436	3.21293e-12	2.95483e-10	17.6953	IQCJ-SCHIP1,SCHIP1	extended	None	ENST00000473061,ENST00000495954	IQCJandSCHIP1.kAug10,IQCJandSCHIP1.uAug10	None	0.63753	0.390871
2:202257769:+,2:202259521:+	1.38593	2.26532	9.21072	3.36407e-12	3.07689e-10	17.5462	TRAK2	core	NM_015049	ENST00000332624,ENST00000542292	TRAK2andALS2CR12.aAug10	uc002uyb.3	1.09976	0.286169
5:170668146:+,5:170669686:+	1.3154	2.0057	9.19677	3.52625e-12	3.21059e-10	17.5471	RANBP17	core	NM_022897	ENST00000389118,ENST00000519256,ENST00000519949,ENST00000521759,ENST00000521834,ENST00000522066,ENST00000522533,ENST00000523189,ENST00000534916	RANBP17.aAug10,RANBP17.bAug10,RANBP17.cAug10,RANBP17.dAug10,RANBP17.eAug10,RANBP17.fAug10,RANBP17.hAug10,RANBP17.nAug10	uc003mba.2,uc003mbb.2,uc003mbd.2,uc010jjs.2	0.379644	0.935758
1:155230241:+,1:155230328:+	1.09508	3.21916	9.17105	3.84615e-12	3.47922e-10	17.5132	SCAMP3	core	NM_005698,NM_052837	ENST00000302631,ENST00000355379,ENST00000462151,ENST00000465312,ENST00000497470	SCAMP3.aAug10,SCAMP3.bAug10,SCAMP3.cAug10,SCAMP3.eAug10,SCAMP3.fAug10,SCAMP3.gAug10,SCAMP3.hAug10,SCAMP3.iAug10,SCAMP3.jAug10,SCAMP3.kAug10,SCAMP3.mAug10,SCAMP3.nAug10,SCAMP3.oAug10,SCAMP3.uAug10,SCAMP3.vaAug10	uc001fjs.2,uc001fjt.2,uc001fju.2,uc001fjv.2	0.960274	0.134809
12:71092129:+,12:71094917:+	1.12706	2.94698	9.15823	4.01625e-12	3.6108e-10	17.4689	PTPRR	core	NM_001207015,NM_001207016,NM_002849,NM_130846	ENST00000283228,ENST00000342084,ENST00000378778,ENST00000440835,ENST00000548220,ENST00000549308,ENST00000550661	PTPRR.aAug10,PTPRR.bAug10,PTPRR.cAug10,PTPRR.dAug10,PTPRR.eAug10,PTPRR.fAug10,PTPRR.lAug10	uc001swh.1,uc001swi.1,uc009zrs.2,uc010stq.1,uc010str.1	1.25745	-0.130393
18:905061:+,18:905387:+	2.48228	0.810552	9.13774	4.30432e-12	3.84566e-10	16.386	ADCYAP1	core	NM_001099733	ENST00000450565	ADCYAP1.aAug10	uc010dkg.2	2.38766	0.0946202
1:151677644:+,1:151678298:+	1.88617	1.67047	9.12478	4.49713e-12	3.99301e-10	16.9136	CELF3	core	NM_001172648,NM_001172649,NM_007185	ENST00000290583,ENST00000290585,ENST00000392706,ENST00000420342,ENST00000470688	CELF3.aAug10,CELF3.bAug10,CELF3.cAug10,CELF3.dAug10,CELF3.eAug10,CELF3.fAug10	uc001eyr.2,uc001eys.1,uc009wmx.1,uc009wmy.2,uc010pdh.1	2.01186	-0.125696
7:28031600:+,7:28220082:+	1.30873	2.38853	9.12294	4.52523e-12	4.01209e-10	17.2963	JAZF1,LOC100128081	core	NM_175061	ENST00000283928,ENST00000452993,ENST00000454041	None	uc003szn.2	1.31034	-0.00160882
12:71050597:+,12:71054720:+	1.13943	2.89722	9.10988	4.72961e-12	4.16283e-10	17.3062	PTPRR	core	NM_001207015,NM_001207016,NM_002849,NM_130846	ENST00000283228,ENST00000342084,ENST00000378778,ENST00000440835,ENST00000537619,ENST00000547752,ENST00000549107,ENST00000549308,ENST00000551219	PTPRR.aAug10,PTPRR.bAug10,PTPRR.cAug10,PTPRR.dAug10,PTPRR.eAug10,PTPRR.gAug10,PTPRR.hAug10,PTPRR.iAug10,PTPRR.jAug10	uc001swf.1,uc001swg.1,uc001swh.1,uc001swi.1,uc009zrs.2,uc010stq.1	1.25745	-0.118019
9:33750725:+,9:33796641:+	1.21477	2.96568	9.10986	4.72992e-12	4.16283e-10	17.2838	PRSS3	core	NM_007343	ENST00000361005	PRSS3.bAug10	uc003ztj.3	1.07731	0.137459
13:36242656:+,13:36245038:+	1.00378	3.39495	9.10918	4.74087e-12	4.1688e-10	17.3141	MIR548F5,NBEA	core	NM_001204197,NM_015678	ENST00000310336,ENST00000379922,ENST00000379939,ENST00000400445,ENST00000402346,ENST00000422518,ENST00000537702,ENST00000540320	NBEA.aAug10,NBEA.bAug10,NBEA.cAug10,NBEA.eAug10	uc001uvb.2,uc001uvd.2,uc010abi.2,uc010tef.1	0.941396	0.062382
6:134492316:+,6:134492775:+	1.13412	3.40256	9.09955	4.89797e-12	4.29564e-10	17.2714	SGK1	core	NM_001143676,NM_001143677,NM_001143678,NM_005627	ENST00000237305,ENST00000367855,ENST00000367857,ENST00000367858,ENST00000413996,ENST00000473704,ENST00000475719,ENST00000477460,ENST00000528577,ENST00000531782	SGK1.aAug10,SGK1.bAug10,SGK1.cAug10,SGK1.dAug10,SGK1.eAug10,SGK1.fAug10,SGK1.gAug10,SGK1.kAug10,SGK1.lAug10	uc003qen.3,uc003qeo.3,uc011ect.1,uc011ecu.1,uc011ecv.1,uc011ecw.1	1.11953	0.0145876
12:71054877:+,12:71056275:+	1.07835	3.26191	9.08837	5.08677e-12	4.42702e-10	17.2464	PTPRR	core	NM_001207015,NM_001207016,NM_002849,NM_130846	ENST00000283228,ENST00000342084,ENST00000378778,ENST00000440835,ENST00000537619,ENST00000549107,ENST00000549308,ENST00000551219	PTPRR.aAug10,PTPRR.bAug10,PTPRR.cAug10,PTPRR.dAug10,PTPRR.eAug10,PTPRR.gAug10,PTPRR.hAug10,PTPRR.iAug10	uc001swg.1,uc001swh.1,uc001swi.1,uc009zrs.2,uc010stq.1	1.25745	-0.179101
4:95539342:+,4:95561427:+	1.10317	3.31037	9.08833	5.08752e-12	4.42702e-10	17.2436	PDLIM5	core	NM_001011513,NM_001256425,NM_001256426,NM_001256427,NM_001256428,NM_006457,NR_024179	ENST00000317968,ENST00000380176,ENST00000437932,ENST00000503974,ENST00000506632,ENST00000514743,ENST00000542407	PDLIM5.aAug10,PDLIM5.bAug10,PDLIM5.cAug10,PDLIM5.dAug10,PDLIM5.eAug10,PDLIM5.fAug10,PDLIM5.gAug10,PDLIM5.hAug10,PDLIM5.viAug10	uc003hth.2,uc003hti.2,uc003htj.2,uc003htk.2,uc003htl.2,uc011cdx.1,uc011cdy.1	1.06138	0.0417885
3:36534721:+,3:36545885:+	1.18029	3.24497	9.05367	5.7215e-12	4.90629e-10	17.1314	STAC	core	NM_003149	ENST00000273183,ENST00000434649,ENST00000457375,ENST00000473452,ENST00000476388,ENST00000544687	STAC.aAug10,STAC.bAug10,STAC.cAug10,STAC.dAug10,STAC.hAug10	uc003cgh.1,uc010hgd.1,uc011aya.1	0.817829	0.362465
7:80546135:+,7:80548144:+	2.39744	0.815368	9.0455	5.88206e-12	5.02122e-10	15.9486	SEMA3C	core	NM_006379	ENST00000265361,ENST00000427167,ENST00000458729,ENST00000470581,ENST00000487621,ENST00000536800	SEMA3C.bAug10,SEMA3C.cAug10,SEMA3C.eAug10,SEMA3C.hAug10,SEMA3C.kAug10,SEMA3C.lAug10	uc003uhj.2,uc011kgx.1	2.72675	-0.329307
1:155829586:+,1:155837756:+	1.43407	3.14706	9.04198	5.95284e-12	5.07184e-10	17.0428	SYT11	core	NM_152280	ENST00000368324	SYT11.aAug10	uc001fmg.2	1.75828	-0.324212
12:57486364:+,12:57486700:+	1.96667	1.91804	9.03404	6.11521e-12	5.19503e-10	16.534	NAB2	core	NM_005967	ENST00000300131,ENST00000342556,ENST00000554839	NAB2.aAug10,NAB2.bAug10,NAB2.dAug10	uc001smz.2	2.20419	-0.237526
6:134493454:+,6:134493800:+	1.0866	3.60019	9.0269	6.26509e-12	5.30437e-10	17.0409	SGK1	core	NM_001143676,NM_001143677,NM_001143678,NM_005627	ENST00000237305,ENST00000367855,ENST00000367857,ENST00000367858,ENST00000413996,ENST00000475719,ENST00000477460,ENST00000489458,ENST00000525877,ENST00000528577	SGK1.aAug10,SGK1.bAug10,SGK1.cAug10,SGK1.dAug10,SGK1.eAug10,SGK1.fAug10,SGK1.gAug10,SGK1.hAug10,SGK1.iAug10,SGK1.jAug10,SGK1.kAug10,SGK1.lAug10,SGK1.mAug10	uc003qen.3,uc003qeo.3,uc011ect.1,uc011ecu.1,uc011ecv.1,uc011ecw.1	1.11953	-0.0329247
7:24910464:+,7:24911361:+	1.52013	1.97964	9.02572	6.29031e-12	5.31674e-10	16.8507	OSBPL3	core	NM_015550,NM_145320,NM_145321,NM_145322	ENST00000313367,ENST00000352860,ENST00000353930,ENST00000396429,ENST00000396431,ENST00000409069,ENST00000409452,ENST00000409555,ENST00000409759,ENST00000409863,ENST00000415162,ENST00000431825	OSBPL3.aAug10,OSBPL3.bAug10,OSBPL3.cAug10,OSBPL3.dAug10,OSBPL3.eAug10,OSBPL3.fAug10,OSBPL3.iAug10	uc003sxd.2,uc003sxe.2,uc003sxf.2,uc003sxg.2,uc003sxh.2,uc003sxi.2	1.34571	0.174418
2:149803537:+,2:149806353:+	1.35004	2.94572	9.02183	6.37386e-12	5.36025e-10	16.9481	KIF5C	core	NM_004522	ENST00000334436,ENST00000414838,ENST00000435030	KIF5C.aAug10	uc010zbu.1	1.0984	0.251635
15:74483832:+,15:74486141:+	1.10553	3.13155	9.00556	6.73576e-12	5.61747e-10	16.9689	STRA6	core	NM_001142617,NM_001142618,NM_001142619,NM_001199040,NM_001199041,NM_001199042,NM_022369	ENST00000323940,ENST00000395105,ENST00000416286,ENST00000423167,ENST00000449139,ENST00000535552,ENST00000536129,ENST00000545137	STRA6.aAug10,STRA6.bAug10,STRA6.cAug10,STRA6.dAug10,STRA6.eAug10,STRA6.fAug10,STRA6.gAug10,STRA6.hAug10,STRA6.iAug10,STRA6.jAug10,STRA6.kAug10,STRA6.lAug10,STRA6.mAug10,STRA6.nAug10	uc002axi.2,uc002axj.2,uc002axk.2,uc002axl.2,uc002axm.2,uc002axn.2,uc010bji.2,uc010bjj.1,uc010ulh.1,uc010uli.1	1.03787	0.0676593
1:99422297:+,1:99469991:+	1.08636	3.02631	8.99903	6.88667e-12	5.72902e-10	16.9479	LOC100129620,LPPR5	core	NM_001010861,NM_001037317	ENST00000263177,ENST00000370188	LPPR5.aAug10,LPPR5.bAug10	uc001dsb.2,uc001dsc.2	1.08655	-0.000187854
21:40185038:+,21:40186197:+	1.75724	1.82287	8.99789	6.91351e-12	5.74182e-10	16.5906	ETS2	core	NM_001256295,NM_005239	ENST00000360214,ENST00000360938,ENST00000432278,ENST00000456966	ETS2.aAug10,ETS2.bAug10,ETS2.cAug10,ETS2.dAug10,ETS2.eAug10,ETS2.fAug10,ETS2.gAug10,ETS2.hAug10	uc002yxf.2,uc002yxg.2	1.78155	-0.0243152
12:42854467:+,12:42858197:+	1.25645	2.52541	8.97856	7.38265e-12	6.09108e-10	16.8514	PRICKLE1	core	NM_001144881,NM_001144882,NM_001144883,NM_153026	ENST00000345127,ENST00000445766,ENST00000455697,ENST00000548696,ENST00000552240	PRICKLE1.aAug10,PRICKLE1.bAug10,PRICKLE1.cAug10,PRICKLE1.dAug10	uc001rnl.2,uc001rnm.2,uc010skv.1,uc010skw.1	1.51598	-0.259533
11:10822634:+,11:10823596:+	1.40406	1.98604	8.97707	7.42013e-12	6.11194e-10	16.7701	EIF4G2	core	NM_001042559	ENST00000396525,ENST00000531416	ZBED5andEIF4G2andSNORD97.aAug10,ZBED5andEIF4G2andSNORD97.iAug10,ZBED5andEIF4G2andSNORD97.jAug10,ZBED5andEIF4G2andSNORD97.qAug10	uc001mjd.2,uc001mjf.1	0.698617	0.70544
5:112479057:+,5:112487006:+	1.07002	3.34482	8.97472	7.47944e-12	6.15574e-10	16.8697	MCC	core	NM_001085377,NM_002387	ENST00000302475,ENST00000408903,ENST00000506605,ENST00000511847,ENST00000514701,ENST00000515367	MCC.aAug10,MCC.bAug10,MCC.dAug10,MCC.eAug10,MCC.gAug10	uc003kqj.3,uc003kqk.3,uc003kql.3,uc011cwb.1	1.22735	-0.157336
4:119674043:+,4:119678876:+	1.2458	2.92765	8.95751	7.93018e-12	6.48941e-10	16.7914	SEC24D	core	NM_014822	ENST00000280551,ENST00000379735,ENST00000419654,ENST00000429811,ENST00000505134,ENST00000509818,ENST00000511481,ENST00000514561	SEC24D.aAug10,SEC24D.bAug10,SEC24D.cAug10,SEC24D.dAug10,SEC24D.eAug10,SEC24D.fAug10,SEC24D.gAug10	uc003ich.3,uc003ici.3,uc003icj.3,uc003icl.2,uc010imz.1	1.08439	0.161408
X:148585823:+,X:148586565:+	1.02747	3.2984	8.94803	8.18996e-12	6.68018e-10	16.7814	IDS	core	NM_000202,NM_001166550,NM_006123	ENST00000340855,ENST00000370441,ENST00000370443,ENST00000428056,ENST00000466323,ENST00000521702	IDS.aAug10,IDS.bAug10,IDS.cAug10,IDS.dAug10,IDS.eAug10,IDS.gAug10,IDS.kAug10,IDS.rAug10	uc011mxe.1,uc011mxf.1,uc011mxg.1,uc011mxh.1,uc011mxi.1,uc011mxj.1	0.937264	0.0902041
12:103352780:+,12:103353140:+	1.43672	2.26501	8.93928	8.43742e-12	6.8597e-10	16.6524	ASCL1	core	NM_004316	ENST00000266744	ASCL1.aAug10	uc001tjr.3	1.43144	0.00528489
15:74483242:+,15:74483508:+	1.1685	3.16252	8.93526	8.55347e-12	6.94278e-10	16.7379	STRA6	core	NM_001142617,NM_001142618,NM_001142619,NM_001199040,NM_001199041,NM_001199042,NM_022369	ENST00000323940,ENST00000395105,ENST00000416286,ENST00000423167,ENST00000449139,ENST00000535552,ENST00000536129,ENST00000545137	STRA6.aAug10,STRA6.bAug10,STRA6.cAug10,STRA6.dAug10,STRA6.eAug10,STRA6.fAug10,STRA6.gAug10,STRA6.hAug10,STRA6.iAug10,STRA6.kAug10,STRA6.lAug10,STRA6.nAug10,STRA6.voAug10	uc002axi.2,uc002axj.2,uc002axk.2,uc002axl.2,uc002axm.2,uc002axn.2,uc010bji.2,uc010ulh.1,uc010uli.1	1.03787	0.130624
7:107110890:+,7:107111817:+	1.70878	1.76	8.93272	8.62769e-12	6.99356e-10	16.4263	COG5,GPR22	core	NM_005295	ENST00000304402,ENST00000473300,ENST00000496754	GPR22.aAug10,GPR22.cAug10,GPR22.dAug10	uc003vef.2	1.6883	0.0204725
4:148457181:+,4:148460969:+	1.91988	1.0147	8.92722	8.79063e-12	7.10652e-10	16.1498	EDNRA	core	NM_001166055,NM_001256283,NM_001957,NR_028596,NR_045958	ENST00000324300,ENST00000339690,ENST00000358556,ENST00000503721,ENST00000506066,ENST00000510697,ENST00000511804	EDNRA.aAug10,EDNRA.bAug10,EDNRA.cAug10,EDNRA.dAug10,EDNRA.eAug10	uc003iky.2,uc010ipf.1,uc010ipg.1,uc011cid.1	1.78243	0.13745
12:111885348:+,12:111885460:+	2.16312	1.92231	8.92447	8.87336e-12	7.16761e-10	16.2241	SH2B3	core	NM_005475	ENST00000341259,ENST00000538307,ENST00000551001	SH2B3.aAug10,SH2B3.bAug10,SH2B3.cAug10	uc001tse.2,uc001tsf.2,uc010syf.1,uc010syg.1	1.94013	0.222989
7:83614793:+,7:83631271:+	1.71064	1.38233	8.9182	9.06476e-12	7.30457e-10	16.4065	SEMA3A	core	NM_006080	ENST00000265362,ENST00000436949	SEMA3A.aAug10	uc003uhz.2	1.12314	0.587502
12:115112640:+,12:115114118:+	1.42386	2.55173	8.90994	9.32333e-12	7.50603e-10	16.545	TBX3	core	NM_005996,NM_016569	ENST00000257566,ENST00000349155,ENST00000361100	TBX3.aAug10,TBX3.bAug10	uc001tvt.1,uc001tvu.1	1.07314	0.350716
4:119203398:+,4:119203986:+	1.07161	3.46531	8.90974	9.32975e-12	7.50603e-10	16.6542	PRSS12	core	NM_003619	ENST00000296498	PRSS12.aAug10	uc003ica.1	0.970894	0.100719
10:90695123:+,10:90697818:+	4.08107	0.592899	8.89114	9.93971e-12	7.95209e-10	12.3934	ACTA2	core	NM_001141945,NM_001613	ENST00000224784,ENST00000458208,ENST00000544901	ACTA2.bAug10,ACTA2.cAug10,ACTA2.fAug10,ACTA2.nAug10	uc001kfp.2,uc001kfq.2,uc010qmy.1	3.50692	0.574141
7:80440017:+,7:80447615:+	2.26946	0.936154	8.88354	1.02004e-11	8.14117e-10	15.6422	SEMA3C	core	NM_006379	ENST00000265361,ENST00000419255,ENST00000544525	SEMA3C.aAug10,SEMA3C.bAug10	uc003uhj.2,uc011kgw.1	2.72675	-0.457288
16:58542913:+,16:58543058:+	1.23483	2.64476	8.88295	1.02212e-11	8.15123e-10	16.5284	NDRG4	core	NM_001130487,NM_001242833,NM_001242834,NM_001242835,NM_001242836,NM_020465,NM_022910,NR_040072	ENST00000258187,ENST00000356752,ENST00000394279,ENST00000394282,ENST00000421602	NDRG4.aAug10,NDRG4.bAug10,NDRG4.cAug10,NDRG4.dAug10,NDRG4.eAug10,NDRG4.fAug10,NDRG4.gAug10,NDRG4.hAug10,NDRG4.iAug10,NDRG4.jAug10,NDRG4.nAug10,NDRG4.vmAug10,NDRG4.vnAug10	uc002enk.2,uc002enm.2,uc002eno.2,uc002enp.2,uc010cdk.2,uc010vif.1,uc010vig.1,uc010vih.1,uc010vii.1	1.2716	-0.0367702
4:119652662:+,4:119653888:+	1.03203	3.34996	8.87118	1.06395e-11	8.41124e-10	16.5253	SEC24D	core	NM_014822	ENST00000280551,ENST00000379735,ENST00000429811,ENST00000505134,ENST00000511481,ENST00000511715	SEC24D.aAug10,SEC24D.bAug10,SEC24D.cAug10,SEC24D.dAug10,SEC24D.fAug10,SEC24D.qAug10	uc003ich.3,uc003ici.3,uc003icj.3,uc003ick.2	1.08439	-0.052356
19:1556922:+,19:1567463:+	1.07084	3.08807	8.86856	1.07349e-11	8.47998e-10	16.5163	MEX3D	core	NM_001174118,NM_203304	ENST00000355663,ENST00000388824,ENST00000402693	MEX3D.aAug10,MEX3D.bAug10	uc010dsn.2	1.07284	-0.00200245
5:130695240:+,5:130721236:+	1.83773	1.86469	8.86826	1.07456e-11	8.48173e-10	16.048	CDC42SE2	core	NM_001038702,NM_020240	ENST00000360515,ENST00000395246,ENST00000505065	CDC42SE2.aAug10,CDC42SE2.bAug10,CDC42SE2.cAug10,CDC42SE2.dAug10,CDC42SE2.eAug10,CDC42SE2.gAug10,CDC42SE2.jAug10	uc003kvh.2,uc003kvi.2,uc003kvj.2,uc003kvl.2	2.12738	-0.289655
19:4365622:+,19:4366498:+	1.19522	2.98155	8.85043	1.14192e-11	8.93604e-10	16.4415	SH3GL1	core	NM_001199944,NM_003025	ENST00000269886	SH3GL1.aAug10,SH3GL1.cAug10,SH3GL1.dAug10,SH3GL1.eAug10	uc002maj.2,uc002mak.2	0.981822	0.213398
11:26552883:+,11:26556003:+	6.57066	-2.51914	8.8485	1.14949e-11	8.98826e-10	7.85795	ANO3	core	NM_031418	ENST00000256737,ENST00000525139,ENST00000531568,ENST00000537978,ENST00000538001	ANO3.aAug10,ANO3.bAug10,ANO3.cAug10	uc001mqt.3,uc010rdr.1,uc010rds.1,uc010rdt.1	5.45906	1.1116
19:41848152:+,19:41850652:+	1.67724	2.1679	8.84701	1.15534e-11	9.027e-10	16.2057	TGFB1	core	NM_000660	ENST00000221930	TGFB1.aAug10,TGFB1.bAug10,TGFB1.cAug10,TGFB1.dAug10,TGFB1.eAug10	uc002oqh.1	1.66166	0.0155826
10:23408380:+,10:23409687:+	1.01148	3.16464	8.83346	1.21001e-11	9.42473e-10	16.3995	MSRB2	core	NM_012228	ENST00000376510,ENST00000468633,ENST00000472663	MSRB2.aAug10,MSRB2.bAug10,MSRB2.cAug10,MSRB2.dAug10,MSRB2.eAug10	uc001iro.2	0.982827	0.0286554
2:149835504:+,2:149837869:+	1.22168	3.18326	8.83174	1.21711e-11	9.46964e-10	16.3706	KIF5C	core	NM_004522	ENST00000334436,ENST00000397413,ENST00000414838,ENST00000435030,ENST00000460377,ENST00000464066	KIF5C.aAug10,KIF5C.bAug10,KIF5C.cAug10	uc002tws.1,uc002twt.2,uc010zbu.1	1.0984	0.123276
5:130651837:+,5:130694902:+	2.44598	1.4315	8.82621	1.24033e-11	9.61603e-10	15.1818	CDC42SE2	core	NM_020240	ENST00000360515,ENST00000502840,ENST00000503291,ENST00000505065,ENST00000506419,ENST00000511432	CDC42SE2.aAug10,CDC42SE2.bAug10,CDC42SE2.cAug10,CDC42SE2.eAug10,CDC42SE2.fAug10,CDC42SE2.hAug10,CDC42SE2.nAug10	uc003kvh.2,uc003kvi.2,uc003kvk.2,uc003kvl.2	2.12738	0.318604
12:15734735:+,12:15739831:+	1.11296	2.88249	8.8248	1.24628e-11	9.65474e-10	16.3656	PTPRO	core	NM_002848,NM_030667,NM_030668,NM_030669,NM_030670,NM_030671	ENST00000281171,ENST00000348962,ENST00000442921,ENST00000445537,ENST00000535322,ENST00000542557,ENST00000544244	PTPRO.aAug10,PTPRO.bAug10,PTPRO.dAug10,PTPRO.eAug10,PTPRO.fAug10,PTPRO.gAug10,PTPRO.hAug10	uc001rcv.1,uc001rcw.1,uc001rcx.1,uc001rcy.1,uc001rcz.1,uc001rda.1	0.921378	0.191579
15:74474603:+,15:74474684:+	1.02334	3.27886	8.82243	1.2564e-11	9.71809e-10	16.3637	STRA6	core	NM_001142617,NM_001142618,NM_001142619,NM_001199040,NM_001199041,NM_001199042,NM_022369	ENST00000323940,ENST00000395105,ENST00000416286,ENST00000423167,ENST00000449139,ENST00000535552,ENST00000536129,ENST00000545137	STRA6.aAug10,STRA6.bAug10,STRA6.cAug10,STRA6.dAug10,STRA6.eAug10,STRA6.fAug10,STRA6.gAug10,STRA6.hAug10,STRA6.iAug10,STRA6.kAug10,STRA6.lAug10,STRA6.nAug10,STRA6.oAug10,STRA6.vcAug10	uc002axi.2,uc002axj.2,uc002axk.2,uc002axl.2,uc002axm.2,uc002axn.2,uc010bji.2,uc010ulh.1,uc010uli.1	1.03787	-0.0145299
18:56816854:+,18:56819768:+	1.00468	3.4063	8.80565	1.33049e-11	1.0228e-09	16.3076	SEC11C	core	NM_033280	ENST00000299714,ENST00000509791	SEC11C.aAug10,SEC11C.bAug10,SEC11C.cAug10,SEC11C.dAug10,SEC11C.eAug10,SEC11C.fAug10	uc002lht.2,uc010dpo.1,uc010xej.1	0.996401	0.00827995
4:119204266:+,4:119216094:+	1.18636	2.94743	8.79975	1.35761e-11	1.03887e-09	16.2638	PRSS12	core	NM_003619	ENST00000296498	PRSS12.aAug10	uc003ica.1	0.970894	0.215463
15:89695083:+,15:89698598:+	1.25192	2.91768	8.79648	1.37283e-11	1.04972e-09	16.2524	ABHD2	core	NM_007011,NM_152924	ENST00000352732,ENST00000355100	ABHD2.aAug10,ABHD2.bAug10,ABHD2.cAug10,ABHD2.dAug10,ABHD2.fAug10	uc002bnj.2,uc002bnk.2	1.35802	-0.106099
1:151682267:+,1:151687070:+	2.08087	1.4906	8.78001	1.45232e-11	1.10376e-09	15.6112	CELF3	core	NM_001172648,NM_001172649,NM_007185	ENST00000290583,ENST00000290585,ENST00000368833,ENST00000420342,ENST00000478829,ENST00000479893	CELF3.aAug10,CELF3.bAug10,CELF3.cAug10,CELF3.dAug10,CELF3.eAug10,CELF3.fAug10,CELF3.hAug10	uc001eyr.2,uc001eys.1,uc001eyt.2,uc009wmx.1,uc009wmy.2,uc010pdi.1	2.01186	0.0690024
3:111719793:+,3:111730610:+	1.29806	2.23917	8.77214	1.49193e-11	1.13044e-09	16.1312	TAGLN3	core	NM_001008272,NM_001008273,NM_013259	ENST00000273368,ENST00000393917,ENST00000455401,ENST00000478951,ENST00000486460,ENST00000540095	TAGLN3.aAug10,TAGLN3.bAug10,TAGLN3.cAug10,TAGLN3.dAug10,TAGLN3.eAug10	uc003dyl.2,uc003dym.2,uc003dyn.2,uc003dyo.2	1.45384	-0.155779
7:83610794:+,7:83614752:+	1.6219	1.39839	8.76442	1.53183e-11	1.15543e-09	15.9281	SEMA3A	core	NM_006080	ENST00000265362,ENST00000436949	SEMA3A.aAug10	uc003uhz.2	1.12314	0.498754
12:4721884:+,12:4722678:+	1.18068	2.67098	8.76185	1.54534e-11	1.16387e-09	16.1559	DYRK4	core	NM_003845	ENST00000010132,ENST00000540757,ENST00000541024,ENST00000544050,ENST00000545342	DYRK4_.cAug10,DYRK4_.fAug10,DYRK4_.gAug10,DYRK4_.mAug10,DYRK4_.vaAug10,DYRK4_.vbAug10,DYRK4_.vdAug10	uc001qmx.2,uc010ser.1	0.688144	0.49254
12:71078044:+,12:71078484:+	1.23931	2.67878	8.75858	1.56272e-11	1.17519e-09	16.1263	PTPRR	core	NM_001207015,NM_001207016,NM_002849,NM_130846	ENST00000283228,ENST00000342084,ENST00000378778,ENST00000440835,ENST00000548220,ENST00000549107,ENST00000549308,ENST00000551219	PTPRR.aAug10,PTPRR.bAug10,PTPRR.cAug10,PTPRR.dAug10,PTPRR.eAug10,PTPRR.fAug10,PTPRR.gAug10,PTPRR.hAug10,PTPRR.lAug10	uc001swh.1,uc001swi.1,uc009zrs.2,uc010stq.1,uc010str.1	1.25745	-0.0181353
2:202254603:+,2:202257632:+	1.25758	2.23458	8.74527	1.63552e-11	1.22352e-09	16.0564	TRAK2	core	NM_015049	ENST00000332624,ENST00000542292	TRAK2andALS2CR12.aAug10	uc002uyb.3	1.09976	0.157812
1:151681824:+,1:151682219:+	2.14862	1.34072	8.74411	1.64199e-11	1.22652e-09	15.3315	CELF3	core	NM_001172648,NM_001172649,NM_007185	ENST00000290583,ENST00000290585,ENST00000470688,ENST00000478829	CELF3.aAug10,CELF3.cAug10,CELF3.dAug10,CELF3.eAug10,CELF3.fAug10,CELF3.hAug10	uc001eys.1,uc009wmx.1,uc009wmy.2,uc010pdi.1	2.01186	0.136756
7:80447734:+,7:80456741:+	2.29529	0.940871	8.73045	1.72059e-11	1.28047e-09	15.099	SEMA3C	core	NM_006379	ENST00000265361,ENST00000419255,ENST00000544525	SEMA3C.aAug10,SEMA3C.bAug10	uc003uhj.2,uc011kgw.1	2.72675	-0.431462
4:170581599:+,4:170601201:+	1.07031	3.03496	8.72902	1.72902e-11	1.28579e-09	16.0521	CLCN3	core	NM_001243374	ENST00000507875	CLCN3.eAug10	uc003isj.1	0.4582	0.612107
7:55863785:+,7:55872951:+	1.69103	2.11906	8.72717	1.74e-11	1.29258e-09	15.8178	2019-09-14	core	NM_207366	ENST00000388975	SEPT14.aAug10,SEPT14.bAug10	uc003tqz.2	1.65175	0.0392768
1:151678441:+,1:151678700:+	2.09142	1.20538	8.71733	1.79961e-11	1.33039e-09	15.2498	CELF3	core	NM_001172648,NM_001172649,NM_007185	ENST00000290583,ENST00000290585,ENST00000392706,ENST00000420342,ENST00000470688	CELF3.aAug10,CELF3.bAug10,CELF3.cAug10,CELF3.dAug10,CELF3.eAug10,CELF3.fAug10	uc001eyr.2,uc001eys.1,uc009wmx.1,uc009wmy.2,uc010pdh.1	2.01186	0.0795577
1:50610869:+,1:50642761:+	1.12212	3.14195	8.70179	1.89802e-11	1.39184e-09	15.9562	ELAVL4	core	NM_001144774,NM_001144775,NM_001144776,NM_001144777,NM_021952	ENST00000357083,ENST00000371819,ENST00000371821,ENST00000371823,ENST00000371824,ENST00000371827,ENST00000448907,ENST00000492299	ELAVL4.aAug10,ELAVL4.bAug10,ELAVL4.cAug10,ELAVL4.dAug10,ELAVL4.eAug10,ELAVL4.fAug10,ELAVL4.gAug10,ELAVL4.hAug10,ELAVL4.jAug10,ELAVL4.kAug10,ELAVL4.lAug10,ELAVL4.mAug10,ELAVL4.nAug10	uc001cry.3,uc001crz.3,uc001csa.3,uc001csb.2,uc001csc.3,uc009vyu.2,uc010omz.1	1.03175	0.0903658
7:80390973:+,7:80394471:+	3.27578	0.220262	8.68902	1.98287e-11	1.44666e-09	13.3083	SEMA3C	core	NM_006379	ENST00000265361,ENST00000419255,ENST00000544525	SEMA3C.aAug10,SEMA3C.bAug10,SEMA3C.dAug10	uc003uhj.2,uc011kgw.1	2.72675	0.54903
5:74698883:+,5:74706836:+	1.05154	3.23915	8.6843	2.01522e-11	1.46387e-09	15.9021	COL4A3BP	core	NM_001130105,NM_005713,NM_031361	ENST00000261415,ENST00000380494,ENST00000405807	COL4A3BP.aAug10,COL4A3BP.bAug10,COL4A3BP.cAug10,COL4A3BP.dAug10	uc003kds.2,uc003kdt.2,uc003kdu.2,uc011csu.1	0.797145	0.254395
2:149838075:+,2:149840134:+	1.1216	3.21702	8.67406	2.08723e-11	1.5107e-09	15.8585	KIF5C	core	NM_004522	ENST00000334436,ENST00000397413,ENST00000414838,ENST00000435030,ENST00000460377,ENST00000464066	KIF5C.aAug10,KIF5C.bAug10,KIF5C.cAug10	uc002tws.1,uc002twt.2,uc010zbu.1	1.0984	0.0232007
20:48273239:+,20:48330113:+	1.22458	2.9074	8.66855	2.12701e-11	1.53728e-09	15.8221	B4GALT5	core	NM_004776	ENST00000371711	B4GALT5.aAug10	uc002xuu.3	1.23294	-0.00836489
1:156248825:+,1:156252398:+	1.06821	3.05941	8.66359	2.16347e-11	1.56025e-09	15.8328	SMG5	core	NM_015327	ENST00000361813,ENST00000368267	SMG5.aAug10	uc001foc.3	1.08943	-0.0212254
6:64288933:+,6:64289162:+	1.07806	3.33767	8.65761	2.2083e-11	1.59029e-09	15.8136	PTP4A1	core	NM_003463	ENST00000370651	PTP4A1.aAug10,PTP4A1.bAug10	uc003pek.2,uc003pel.2	1.07253	0.0055266
20:36147752:+,20:36156195:+	1.85006	1.79539	8.65598	2.22068e-11	1.59806e-09	15.3303	BLCAP	core	NM_006698	ENST00000373537,ENST00000467603	BLCAP.eAug10	uc002xhc.2	1.85093	-0.00086802
16:58543256:+,16:58545326:+	1.29182	2.29261	8.64295	2.32222e-11	1.65804e-09	15.7104	NDRG4	core	NM_001130487,NM_001242833,NM_001242834,NM_001242836,NM_020465,NM_022910,NR_040072	ENST00000258187,ENST00000356752,ENST00000394279,ENST00000394282	NDRG4.aAug10,NDRG4.bAug10,NDRG4.cAug10,NDRG4.dAug10,NDRG4.eAug10,NDRG4.fAug10,NDRG4.hAug10,NDRG4.jAug10,NDRG4.nAug10,NDRG4.vmAug10,NDRG4.vnAug10	uc002enk.2,uc002enm.2,uc002enp.2,uc010cdk.2,uc010vif.1,uc010vig.1,uc010vih.1,uc010vii.1	1.2716	0.0202171
4:119689466:+,4:119718838:+	1.01891	3.25147	8.6421	2.32897e-11	1.66049e-09	15.7618	SEC24D	core	NM_014822	ENST00000280551,ENST00000379735,ENST00000419654,ENST00000509818,ENST00000514561	SEC24D.aAug10,SEC24D.bAug10,SEC24D.cAug10,SEC24D.eAug10,SEC24D.gAug10	uc003ici.3,uc003icj.3,uc003icl.2,uc010imz.1	1.08439	-0.0654787
5:52204871:+,5:52205992:+	1.04557	2.89801	8.64169	2.33231e-11	1.66169e-09	15.7603	ITGA1	core	NM_181501	ENST00000282588,ENST00000504669	PELOandITGA1andRPL17P21.aAug10,PELOandITGA1andRPL17P21.bAug10,PELOandITGA1andRPL17P21.cAug10	uc003jou.2,uc003jov.2,uc003jow.2	0.922298	0.123275
2:149855023:+,2:149856937:+	1.28553	2.86314	8.63821	2.36026e-11	1.67803e-09	15.6966	KIF5C	core	NM_004522	ENST00000334436,ENST00000397413,ENST00000414838,ENST00000435030,ENST00000464066	KIF5C.aAug10,KIF5C.bAug10	uc002tws.1,uc010zbu.1	1.0984	0.187123
16:55690081:+,16:55690556:+	1.16281	2.26282	8.61652	2.54276e-11	1.79631e-09	15.6601	SLC6A2	core	NM_001172501	ENST00000414754,ENST00000537705	tatema.aAug10	uc002eif.2,uc010ccd.2	1.48384	-0.321031
1:148932920:+,1:148951245:+	2.05392	1.14784	8.60989	2.60132e-11	1.8338e-09	14.9245	LOC645166	core	NR_027356	ENST00000452399	LOC645166.cAug10	uc010pbd.1	1.36122	0.692699
5:52194213:+,5:52201593:+	1.01715	3.00573	8.60149	2.67741e-11	1.87951e-09	15.6264	ITGA1	core	NM_181501	ENST00000282588	PELOandITGA1andRPL17P21.aAug10,PELOandITGA1andRPL17P21.bAug10	uc003jou.2,uc003jov.2	0.922298	0.0948542
7:83823984:+,7:83936523:+	1.8392	0.364356	8.60049	2.68662e-11	1.88334e-09	15.1363	SEMA3A	extended	None	ENST00000424555,ENST00000448879	SEMA3A.hAug10,SEMA3A.kAug10	None	1.12314	0.716061
15:74477396:+,15:74481456:+	1.01027	3.22623	8.59626	2.72599e-11	1.90827e-09	15.6084	STRA6	core	NM_001142617,NM_001142618,NM_001142619,NM_001199040,NM_001199041,NM_001199042,NM_022369	ENST00000323940,ENST00000395105,ENST00000416286,ENST00000423167,ENST00000449139,ENST00000535552,ENST00000536129,ENST00000545137	STRA6.aAug10,STRA6.bAug10,STRA6.cAug10,STRA6.dAug10,STRA6.eAug10,STRA6.fAug10,STRA6.gAug10,STRA6.hAug10,STRA6.iAug10,STRA6.kAug10,STRA6.lAug10,STRA6.mAug10,STRA6.nAug10,STRA6.pAug10	uc002axi.2,uc002axj.2,uc002axk.2,uc002axl.2,uc002axm.2,uc002axn.2,uc010bji.2,uc010bjj.1,uc010ulh.1,uc010uli.1	1.03787	-0.0276077
12:111884837:+,12:111884929:+	2.1414	1.67366	8.59443	2.74313e-11	1.91759e-09	14.969	SH2B3	core	NM_005475	ENST00000341259,ENST00000538307,ENST00000551001	SH2B3.bAug10,SH2B3.cAug10,SH2B3.fAug10	uc001tse.2,uc010syf.1,uc010syg.1	1.94013	0.20127
5:74696122:+,5:74698797:+	1.05845	3.00079	8.57578	2.92475e-11	2.02199e-09	15.5401	COL4A3BP	core	NM_001130105,NM_005713,NM_031361	ENST00000261415,ENST00000380494,ENST00000405807	COL4A3BP.aAug10,COL4A3BP.bAug10,COL4A3BP.cAug10,COL4A3BP.dAug10	uc003kds.2,uc003kdt.2,uc003kdu.2,uc011csu.1	0.797145	0.261302
12:15731877:+,12:15732973:+	1.05202	3.18805	8.56651	3.01943e-11	2.07173e-09	15.5077	PTPRO	core	NM_002848,NM_030667,NM_030668,NM_030669,NM_030670,NM_030671	ENST00000281171,ENST00000348962,ENST00000442921,ENST00000445537,ENST00000535311,ENST00000538907,ENST00000542557,ENST00000544244	PTPRO.aAug10,PTPRO.bAug10,PTPRO.dAug10,PTPRO.eAug10,PTPRO.fAug10,PTPRO.gAug10,PTPRO.jAug10,PTPRO.pAug10	uc001rcv.1,uc001rcw.1,uc001rcx.1,uc001rcy.1,uc001rcz.1,uc001rda.1	0.921378	0.130643
15:74473278:+,15:74473636:+	1.00842	3.48868	8.56038	3.08373e-11	2.11296e-09	15.479	STRA6	core	NM_001142617,NM_001142618,NM_001142619,NM_001199040,NM_001199041,NM_001199042,NM_022369	ENST00000323940,ENST00000395105,ENST00000416286,ENST00000423167,ENST00000449139,ENST00000535552,ENST00000536129,ENST00000545137	STRA6.aAug10,STRA6.bAug10,STRA6.cAug10,STRA6.dAug10,STRA6.eAug10,STRA6.fAug10,STRA6.gAug10,STRA6.hAug10,STRA6.iAug10,STRA6.jAug10,STRA6.kAug10,STRA6.lAug10,STRA6.nAug10,STRA6.oAug10,STRA6.pAug10,STRA6.vcAug10	uc002axi.2,uc002axj.2,uc002axk.2,uc002axl.2,uc002axm.2,uc002axn.2,uc010bji.2,uc010ulh.1,uc010uli.1	1.03787	-0.0294583
4:148461102:+,4:148461529:+	1.896	1.046	8.51309	3.62875e-11	2.43807e-09	14.8458	EDNRA	core	NM_001166055,NM_001256283,NM_001957,NR_028596,NR_045958	ENST00000324300,ENST00000339690,ENST00000358556,ENST00000503721,ENST00000506066,ENST00000510697,ENST00000511804	EDNRA.aAug10,EDNRA.bAug10,EDNRA.cAug10,EDNRA.dAug10	uc003iky.2,uc010ipf.1,uc010ipg.1,uc011cid.1	1.78243	0.113568
1:155226210:+,1:155226465:+	1.06072	3.14493	8.50999	3.66769e-11	2.45929e-09	15.3195	SCAMP3	core	NM_005698,NM_052837	ENST00000302631,ENST00000355379,ENST00000472397,ENST00000478737,ENST00000490999	SCAMP3.aAug10,SCAMP3.bAug10,SCAMP3.cAug10,SCAMP3.dAug10,SCAMP3.eAug10,SCAMP3.gAug10,SCAMP3.jAug10,SCAMP3.nAug10,SCAMP3.rAug10	uc001fjr.2,uc001fjs.2,uc001fjt.2,uc001fju.2,uc001fjv.2	0.960274	0.100447
1:156244477:+,1:156246876:+	1.00666	3.26237	8.50931	3.67623e-11	2.46337e-09	15.3157	SMG5	core	NM_015327	ENST00000361813,ENST00000368267	SMG5.aAug10	uc001foc.3	1.08943	-0.0827724
2:149806976:+,2:149818485:+	1.14682	3.33254	8.50764	3.69751e-11	2.47597e-09	15.3077	KIF5C	core	NM_004522	ENST00000334436,ENST00000397413,ENST00000414838,ENST00000435030,ENST00000450621,ENST00000464066	KIF5C.aAug10,KIF5C.bAug10,KIF5C.gAug10,KIF5C.kAug10	uc002tws.1,uc010zbu.1	1.0984	0.0484176
18:908364:+,18:909447:+	2.62903	0.122974	8.50539	3.7263e-11	2.49026e-09	13.7275	ADCYAP1	core	NM_001099733,NM_001117	ENST00000269200,ENST00000400219,ENST00000450565	ADCYAP1.aAug10,ADCYAP1.bAug10,ADCYAP1.cAug10,ADCYAP1.dAug10	uc010dkg.2,uc010dkh.2	2.38766	0.241367
11:26574892:+,11:26581266:+	6.12463	-2.04678	8.49423	3.8723e-11	2.5656e-09	7.40433	ANO3,MUC15	core	NM_031418	ENST00000256737,ENST00000525139,ENST00000529242,ENST00000531568,ENST00000537978,ENST00000538001	ANO3.aAug10,ANO3.bAug10,ANO3.cAug10,ANO3.eAug10	uc001mqt.3,uc010rdr.1,uc010rds.1,uc010rdt.1	5.60117	0.523466
19:41854360:+,19:41858595:+	1.51935	2.37801	8.49137	3.91062e-11	2.58624e-09	15.1215	TGFB1	core	NM_000660	ENST00000221930	TGFB1.aAug10,TGFB1.bAug10	uc002oqh.1	1.66166	-0.142306
4:119659534:+,4:119660304:+	1.18989	2.82921	8.47671	4.11326e-11	2.69849e-09	15.2006	SEC24D	core	NM_014822	ENST00000280551,ENST00000379735,ENST00000419654,ENST00000429811,ENST00000502526,ENST00000505134,ENST00000511481,ENST00000514561	SEC24D.aAug10,SEC24D.bAug10,SEC24D.cAug10,SEC24D.dAug10,SEC24D.eAug10,SEC24D.fAug10,SEC24D.mAug10	uc003ich.3,uc003ici.3,uc003icj.3,uc003icl.2	1.08439	0.105497
7:55874951:+,7:55886820:+	1.88013	1.65939	8.47138	4.18944e-11	2.74309e-09	14.7025	2019-09-14	core	NM_207366	ENST00000388975	SEPT14.aAug10,SEPT14.bAug10	uc003tqz.2	1.65175	0.228381
6:134491573:+,6:134491964:+	1.15145	3.21873	8.46622	4.26476e-11	2.78512e-09	15.1592	SGK1	core	NM_001143676,NM_001143677,NM_001143678,NM_005627	ENST00000237305,ENST00000367855,ENST00000367857,ENST00000367858,ENST00000413996,ENST00000475719,ENST00000477460,ENST00000528577	SGK1.aAug10,SGK1.bAug10,SGK1.cAug10,SGK1.dAug10,SGK1.eAug10,SGK1.fAug10,SGK1.gAug10,SGK1.lAug10	uc003qen.3,uc003qeo.3,uc011ect.1,uc011ecu.1,uc011ecv.1,uc011ecw.1	1.11953	0.0319183
12:15733765:+,12:15734613:+	1.02022	3.01658	8.4648	4.28568e-11	2.79697e-09	15.168	PTPRO	core	NM_002848,NM_030667,NM_030668,NM_030669,NM_030670,NM_030671	ENST00000281171,ENST00000348962,ENST00000442921,ENST00000445537,ENST00000535322,ENST00000542557,ENST00000544244	PTPRO.aAug10,PTPRO.bAug10,PTPRO.dAug10,PTPRO.eAug10,PTPRO.fAug10,PTPRO.gAug10,PTPRO.hAug10	uc001rcv.1,uc001rcw.1,uc001rcx.1,uc001rcy.1,uc001rcz.1,uc001rda.1	0.921378	0.098843
10:90701626:+,10:90703554:+	4.03071	0.386014	8.41317	5.1212e-11	3.27613e-09	10.9482	ACTA2	core	NM_001141945,NM_001613	ENST00000224784,ENST00000415557,ENST00000458159,ENST00000458208,ENST00000480297,ENST00000544901	ACTA2.aAug10,ACTA2.bAug10,ACTA2.cAug10,ACTA2.dAug10,ACTA2.gAug10	uc001kfp.2,uc001kfq.2,uc010qmy.1	3.50692	0.523791
1:155230450:+,1:155231448:+	1.14277	2.8544	8.40918	5.19225e-11	3.31496e-09	14.9725	SCAMP3	core	NM_005698	ENST00000302631,ENST00000462151,ENST00000497470	SCAMP3.aAug10,SCAMP3.bAug10,SCAMP3.eAug10,SCAMP3.fAug10,SCAMP3.gAug10,SCAMP3.iAug10,SCAMP3.jAug10,SCAMP3.kAug10,SCAMP3.nAug10,SCAMP3.oAug10,SCAMP3.uAug10	uc001fjs.2,uc001fju.2,uc001fjv.2	0.960274	0.182496
16:3071690:+,16:3071772:+	1.79676	1.89872	8.39987	5.36187e-11	3.41701e-09	14.5178	TNFRSF12A	core	NM_016639	ENST00000326577,ENST00000341627	TNFRSF12A.aAug10,TNFRSF12A.bAug10,TNFRSF12A.cAug10,TNFRSF12A.dAug10,TNFRSF12A.eAug10,TNFRSF12A.fAug10	uc002csv.3,uc002csw.3	1.88705	-0.0902883
5:52177853:+,5:52183647:+	1.04673	2.83056	8.38208	5.7016e-11	3.61056e-09	14.8901	ITGA1	core	NM_181501	ENST00000282588,ENST00000513737	PELOandITGA1andRPL17P21.aAug10,PELOandITGA1andRPL17P21.bAug10	uc003jou.2,uc003jov.2	0.922298	0.124427
5:130721337:+,5:130726686:+	1.78485	1.75454	8.37214	5.90095e-11	3.72503e-09	14.428	CDC42SE2	core	NM_001038702,NM_020240	ENST00000360515,ENST00000395246,ENST00000503291,ENST00000505065	CDC42SE2.aAug10,CDC42SE2.bAug10,CDC42SE2.cAug10,CDC42SE2.dAug10,CDC42SE2.eAug10,CDC42SE2.fAug10,CDC42SE2.gAug10,CDC42SE2.jAug10	uc003kvh.2,uc003kvi.2,uc003kvj.2,uc003kvk.2,uc003kvl.2	2.12738	-0.342534
21:19617619:+,21:19628826:+	2.6221	0.0272662	8.36803	5.98531e-11	3.76879e-09	13.3306	CHODL	core	NM_024944	ENST00000299295,ENST00000338326	CHODL.bAug10	uc002ykv.2	2.58141	0.0406884
7:80387804:+,7:80390932:+	3.24187	0.172006	8.35745	6.20826e-11	3.89206e-09	12.282	SEMA3C	core	NM_006379	ENST00000265361,ENST00000419255,ENST00000544525	SEMA3C.aAug10,SEMA3C.bAug10	uc003uhj.2,uc011kgw.1	2.72675	0.515119
2:149633312:+,2:149679706:+	1.31314	2.71345	8.3551	6.25895e-11	3.91649e-09	14.743	KIF5C	core	NM_004522	ENST00000435030,ENST00000451033	rimomo.aAug10	uc010zbu.1	1.0984	0.214734
18:905497:+,18:907660:+	2.31966	0.374257	8.33727	6.65707e-11	4.13402e-09	13.713	ADCYAP1	core	NM_001099733,NM_001117	ENST00000269200,ENST00000400219,ENST00000450565	ADCYAP1.aAug10,ADCYAP1.bAug10	uc010dkg.2,uc010dkh.2	2.38766	-0.0680085
11:70266616:+,11:70269046:+	1.28443	2.39789	8.31961	7.07627e-11	4.35721e-09	14.6361	CTTN	core	NM_001184740,NM_138565	ENST00000346329,ENST00000376561,ENST00000527962	CTTN.aAug10,CTTN.cAug10,CTTN.fAug10	uc001opu.2,uc001opw.3	0.26973	1.0147
19:41850769:+,19:41854200:+	1.79463	2.00933	8.31721	7.13539e-11	4.38553e-09	14.3642	TGFB1	core	NM_000660	ENST00000221930	TGFB1.aAug10,TGFB1.bAug10,TGFB1.cAug10,TGFB1.dAug10	uc002oqh.1	1.66166	0.13297
19:4361793:+,19:4362326:+	1.0571	3.17242	8.31066	7.2991e-11	4.46425e-09	14.6503	SH3GL1	core	NM_001199943,NM_001199944,NM_003025	ENST00000269886,ENST00000417295	SH3GL1.aAug10,SH3GL1.bAug10,SH3GL1.cAug10,SH3GL1.dAug10	uc002maj.2,uc002mak.2,uc010xig.1	0.981822	0.0752781
21:19190642:+,21:19191620:+	1.82387	1.39217	8.30775	7.37289e-11	4.50115e-09	14.2467	C21orf91	core	NM_001100420,NM_001100421,NM_017447	ENST00000284881,ENST00000400558,ENST00000400559,ENST00000482915,ENST00000493464	C21orf91.aAug10,C21orf91.bAug10,C21orf91.dAug10,C21orf91.eAug10,C21orf91.gAug10	uc002yko.3,uc002ykp.3,uc002ykq.3	1.41769	0.406181
7:24839898:+,7:24843934:+	1.46923	2.25271	8.2926	7.76985e-11	4.71464e-09	14.4921	OSBPL3	core	NM_015550,NM_145320,NM_145321,NM_145322	ENST00000313367,ENST00000352860,ENST00000353930,ENST00000396429,ENST00000396431,ENST00000409069,ENST00000409452,ENST00000409555,ENST00000409759,ENST00000409863,ENST00000431825,ENST00000487020	OSBPL3.aAug10,OSBPL3.bAug10,OSBPL3.cAug10,OSBPL3.dAug10,OSBPL3.eAug10,OSBPL3.fAug10,OSBPL3.lAug10	uc003sxd.2,uc003sxe.2,uc003sxf.2,uc003sxg.2,uc003sxh.2,uc003sxi.2	1.34571	0.123517
5:112406931:+,5:112418557:+	1.04355	3.09112	8.28618	7.9447e-11	4.78899e-09	14.5677	MCC	core	NM_001085377,NM_002387	ENST00000302475,ENST00000408903,ENST00000514701,ENST00000515367	MCC.aAug10,MCC.bAug10,MCC.cAug10,MCC.dAug10,MCC.eAug10,MCC.fAug10	uc003kqj.3,uc003kqk.3,uc003kql.3,uc010jcd.1,uc011cwb.1	1.22735	-0.183801
12:39047872:+,12:39064531:+	1.04131	2.96842	8.27456	8.27075e-11	4.9676e-09	14.5282	CPNE8	core	NM_153634	ENST00000331366,ENST00000360449,ENST00000538596,ENST00000546603,ENST00000547417	CPNE8.aAug10,CPNE8.bAug10,CPNE8.fAug10,CPNE8.gAug10,CPNE8.hAug10,CPNE8.jAug10	uc001rlr.1,uc001rls.1	0.918754	0.122559
10:90701147:+,10:90701542:+	3.50122	0.729254	8.26981	8.40797e-11	5.03494e-09	11.7725	ACTA2	core	NM_001141945,NM_001613	ENST00000224784,ENST00000458208,ENST00000480297,ENST00000544901	ACTA2.aAug10,ACTA2.bAug10,ACTA2.cAug10,ACTA2.dAug10,ACTA2.gAug10	uc001kfp.2,uc001kfq.2,uc010qmy.1	3.50692	-0.00570123
1:156220461:+,1:156220649:+	1.01019	3.05753	8.26714	8.4862e-11	5.06967e-09	14.5032	SMG5	core	NM_015327	ENST00000361813,ENST00000420555,ENST00000476954	SMG5.aAug10,SMG5.cAug10,SMG5.fAug10	uc001foc.3	1.08943	-0.0792453
15:74489764:+,15:74490093:+	1.03231	3.02251	8.26174	8.64664e-11	5.15937e-09	14.4855	STRA6	core	NM_001142617,NM_001142618,NM_001142619,NM_001142620,NM_001199040,NM_001199041,NM_001199042,NM_022369	ENST00000323940,ENST00000395105,ENST00000416286,ENST00000423167,ENST00000432245,ENST00000449139,ENST00000535552	STRA6.aAug10,STRA6.bAug10,STRA6.cAug10,STRA6.dAug10,STRA6.eAug10,STRA6.fAug10,STRA6.gAug10,STRA6.hAug10,STRA6.iAug10,STRA6.jAug10,STRA6.lAug10,STRA6.mAug10,STRA6.qAug10,STRA6.rAug10,STRA6.sAug10,STRA6.tAug10,STRA6.uAug10,STRA6.vaAug10,STRA6.vbAug10,STRA6.vdAug10,STRA6.veAug10,STRA6.vfAug10,STRA6.vgAug10,STRA6.vhAug10,STRA6.viAug10,STRA6.vjAug10,STRA6.vmAug10	uc002axj.2,uc002axk.2,uc002axl.2,uc002axm.2,uc002axn.2,uc010bji.2,uc010bjj.1,uc010bjk.2,uc010ulh.1,uc010uli.1	1.03787	-0.00556636
12:56142767:+,12:56143286:+	1.04057	2.77039	8.25993	8.70099e-11	5.18254e-09	14.4788	GDF11	core	NM_005811	ENST00000257868,ENST00000546799	GDF11.aAug10,GDF11.bAug10	uc001shq.2,uc010spv.1	1.05399	-0.0134246
12:57487381:+,12:57488395:+	2.42605	1.05876	8.25906	8.72724e-11	5.19202e-09	13.336	NAB2	core	NM_005967	ENST00000300131,ENST00000357680	NAB2.aAug10	uc001smz.2	2.20419	0.221853
5:16067902:+,5:16177835:+	1.50263	1.5806	8.25784	8.76405e-11	5.21082e-09	14.3103	2019-03-11	extended	None	ENST00000507111	None	None	0.572514	0.930112
5:14497983:+,5:14498198:+	1.10765	3.18364	8.2337	9.5292e-11	5.59277e-09	14.3882	TRIO	core	NM_007118	ENST00000344135,ENST00000344204,ENST00000512070,ENST00000513206,ENST00000537187	TRIO.aAug10,TRIO.bAug10,TRIO.eAug10,TRIO.fAug10,TRIO.iAug10,TRIO.kAug10	uc003jff.2,uc003jfg.2	0.614629	0.493017
12:71286757:+,12:71314113:+	1.21847	2.49787	8.2332	9.5457e-11	5.59918e-09	14.3677	PTPRR	core	NM_002849	ENST00000283228	PTPRR.aAug10	uc001swi.1	1.25745	-0.0389836
19:41847935:+,19:41848075:+	1.85256	2.04543	8.23021	9.64514e-11	5.65089e-09	14.1091	TGFB1	core	NM_000660	ENST00000221930	TGFB1.bAug10,TGFB1.cAug10	uc002oqh.1	1.66166	0.190901
7:24859857:+,7:24870387:+	1.39243	2.07065	8.22798	9.72e-11	5.6881e-09	14.2699	OSBPL3	core	NM_015550,NM_145320,NM_145321,NM_145322	ENST00000313367,ENST00000352860,ENST00000353930,ENST00000396429,ENST00000396431,ENST00000409069,ENST00000409452,ENST00000409555,ENST00000409759,ENST00000409863,ENST00000431825	OSBPL3.aAug10,OSBPL3.bAug10,OSBPL3.cAug10,OSBPL3.dAug10,OSBPL3.eAug10,OSBPL3.fAug10	uc003sxd.2,uc003sxe.2,uc003sxf.2,uc003sxg.2,uc003sxh.2,uc003sxi.2	1.34571	0.0467129
6:166862337:+,6:166864591:+	1.78209	1.70018	8.22726	9.74423e-11	5.69895e-09	13.9906	RPS6KA2	core	NM_001006932,NM_021135	ENST00000265678,ENST00000405189,ENST00000481261,ENST00000491836,ENST00000503859,ENST00000510118	RNASET2andRPS6KA2.aAug10,RNASET2andRPS6KA2.bAug10,RNASET2andRPS6KA2.cAug10,RNASET2andRPS6KA2.dAug10,RNASET2andRPS6KA2.eAug10,RNASET2andRPS6KA2.oAug10	uc003qvb.1,uc003qvc.1,uc003qvd.1,uc010kkl.1,uc011ego.1	1.39312	0.388973
10:43622170:+,10:43623560:+	1.10575	3.1974	8.22054	9.97416e-11	5.81985e-09	14.3402	RET	core	NM_020975	ENST00000355710	RET.aAug10	uc001jal.2	0.504861	0.600891
7:27935035:+,7:28031528:+	1.38314	1.96694	8.21547	1.0151e-10	5.91269e-09	14.2329	JAZF1	core	NM_175061	ENST00000283928,ENST00000420835,ENST00000427814,ENST00000430432,ENST00000447620	JAZF1.aAug10,JAZF1.bAug10,JAZF1.cAug10,JAZF1.dAug10,JAZF1.eAug10	uc003szm.2,uc003szn.2	1.02864	0.354504
15:74488488:+,15:74489679:+	1.18526	2.72031	8.21471	1.01778e-10	5.92489e-09	14.3197	STRA6	core	NM_001142617,NM_001142618,NM_001142620,NM_001199040,NM_001199041,NM_001199042,NM_022369	ENST00000323940,ENST00000395105,ENST00000416286,ENST00000432245,ENST00000449139,ENST00000535552	STRA6.aAug10,STRA6.bAug10,STRA6.cAug10,STRA6.dAug10,STRA6.eAug10,STRA6.fAug10,STRA6.gAug10,STRA6.hAug10,STRA6.jAug10,STRA6.kAug10,STRA6.lAug10,STRA6.mAug10,STRA6.qAug10,STRA6.rAug10,STRA6.sAug10,STRA6.tAug10,STRA6.vaAug10,STRA6.vbAug10,STRA6.vdAug10,STRA6.veAug10,STRA6.vgAug10,STRA6.vhAug10,STRA6.viAug10	uc002axj.2,uc002axk.2,uc002axl.2,uc002axm.2,uc010bji.2,uc010bjj.1,uc010bjk.2,uc010ulh.1,uc010uli.1	1.03787	0.147388
17:40618525:+,17:40620028:+	1.23548	2.53163	8.21264	1.02512e-10	5.96065e-09	14.2864	ATP6V0A1	core	NM_001130020,NM_001130021,NM_005177	ENST00000264649,ENST00000343619,ENST00000393829,ENST00000537728,ENST00000546249	ATP6V0A1.aAug10,ATP6V0A1.bAug10,ATP6V0A1.cAug10,ATP6V0A1.dAug10,ATP6V0A1.eAug10,ATP6V0A1.fAug10,ATP6V0A1.hAug10,ATP6V0A1.kAug10,ATP6V0A1.mAug10,ATP6V0A1.pAug10,ATP6V0A1.uAug10,ATP6V0A1.vbAug10,ATP6V0A1.vhAug10,ATP6V0A1.viAug10	uc002hzp.1,uc002hzq.2,uc002hzr.2,uc002hzs.2,uc010wgj.1,uc010wgk.1	0.961028	0.274449
5:130726801:+,5:130727522:+	2.21973	1.27291	8.18534	1.12698e-10	6.48155e-09	13.3263	CDC42SE2	extended	None	None	CDC42SE2.bAug10,CDC42SE2.eAug10,CDC42SE2.gAug10,CDC42SE2.jAug10	uc003kvl.2	2.12738	0.0923463
5:83476339:+,5:83549902:+	1.35444	2.08956	8.18133	1.14282e-10	6.55383e-09	14.1289	EDIL3	extended	None	ENST00000380138	EDIL3.dAug10	uc003kip.1	1.26206	0.0923724
1:246823636:+,1:246829002:+	1.26179	2.0779	8.18047	1.14623e-10	6.56959e-09	14.1666	CNST	core	NM_152609	ENST00000366513	CNST.aAug10,CNST.bAug10	uc001ibp.2	0.632172	0.629616
4:119644810:+,4:119649716:+	1.07481	3.10823	8.17502	1.1681e-10	6.67211e-09	14.1918	SEC24D	core	NM_014822	ENST00000280551,ENST00000379735,ENST00000429811,ENST00000502830,ENST00000505134,ENST00000511481	SEC24D.aAug10,SEC24D.bAug10,SEC24D.dAug10,SEC24D.fAug10,SEC24D.uAug10	uc003ich.3,uc003ici.3,uc003icj.3	1.08439	-0.00957772
1:99764786:+,1:99766465:+	1.09965	2.52098	8.16953	1.19058e-10	6.77347e-09	14.1714	LPPR4	core	NM_001166252,NM_014839	ENST00000263178,ENST00000370184,ENST00000370185,ENST00000457765	LPPR4.aAug10,LPPR4.bAug10	uc001dse.2,uc010oue.1	1.32678	-0.227129
2:197006021:+,2:197008284:+	1.31554	2.00273	8.15314	1.26033e-10	7.1178e-09	14.0526	STK17B	core	NM_004226	ENST00000263955,ENST00000409228	STK17B.aAug10,STK17B.bAug10	uc002utk.2,uc010fsh.2	1.15512	0.160426
1:99730227:+,1:99753521:+	1.25001	2.20052	8.1515	1.26756e-10	7.15054e-09	14.0694	LPPR4	core	NM_001166252,NM_014839	ENST00000263178,ENST00000370185,ENST00000457765	LPPR4.aAug10,LPPR4.bAug10	uc001dse.2,uc010oue.1	1.32678	-0.0767731
1:156228954:+,1:156230242:+	1.14177	2.80777	8.13412	1.34647e-10	7.53806e-09	14.054	SMG5	core	NM_015327	ENST00000361813	SMG5.aAug10,SMG5.bAug10,SMG5.cAug10	uc001foc.3,uc009wrv.2	1.08943	0.0523359
15:41030774:+,15:41032331:+	1.0537	2.73499	8.12937	1.36889e-10	7.65719e-09	14.0383	FAM82A2	core	NM_018145	ENST00000260385,ENST00000338376,ENST00000426872,ENST00000558232,ENST00000558777,ENST00000560460,ENST00000560779	FAM82A2.aAug10,FAM82A2.bAug10,FAM82A2.cAug10,FAM82A2.dAug10,FAM82A2.fAug10,FAM82A2.iAug10	uc001zmo.1,uc001zmp.1,uc001zmq.1	0.677731	0.375971
2:202248939:+,2:202250941:+	1.06988	2.53725	8.12212	1.40382e-10	7.80934e-09	14.0118	TRAK2	core	NM_015049	ENST00000332624,ENST00000542292	TRAK2andALS2CR12.aAug10,TRAK2andALS2CR12.bAug10	uc002uyb.3	1.09976	-0.0298888
11:26660788:+,11:26663443:+	5.99226	-1.99219	8.12054	1.41155e-10	7.84798e-09	6.7914	ANO3	core	NM_031418	ENST00000256737,ENST00000525139,ENST00000531568,ENST00000537978,ENST00000538001	ANO3.aAug10,ANO3.bAug10,ANO3.cAug10,ANO3.dAug10	uc001mqt.3,uc010rdr.1,uc010rds.1,uc010rdt.1	5.45906	0.533207
5:83476339:+,5:83525673:+	1.22605	2.3264	8.10885	1.47009e-10	8.12836e-09	13.934	EDIL3	core	NM_005711	ENST00000296591	EDIL3.cAug10	uc003kio.1	1.26206	-0.0360172
6:64282624:+,6:64286341:+	1.24408	2.48985	8.10843	1.47226e-10	8.13144e-09	13.9299	PTP4A1	core	NM_003463	ENST00000370650,ENST00000370651	PTP4A1.aAug10	uc003pel.2	1.07253	0.171555
19:39989683:+,19:39989832:+	1.05467	2.77256	8.10503	1.48977e-10	8.21453e-09	13.9567	DLL3	core	NM_016941,NM_203486	ENST00000205143,ENST00000356433	DLL3.aAug10,DLL3.cAug10,DLL3.dAug10,DLL3.eAug10	uc002olw.2,uc002olx.2,uc010egq.2	0.888058	0.166609
5:83259179:+,5:83356119:+	1.09898	2.66658	8.09876	1.52259e-10	8.36254e-09	13.9306	EDIL3	core	NM_005711	ENST00000296591,ENST00000380138	EDIL3.cAug10,EDIL3.dAug10	uc003kio.1,uc003kip.1	1.26206	-0.163081
10:104163187:+,10:104163599:+	1.36641	1.85414	8.08594	1.59203e-10	8.71608e-09	13.8095	PSD	core	NM_002779	ENST00000020673,ENST00000406432,ENST00000541902	PSD.aAug10,PSD.bAug10,PSD.cAug10,PSD.dAug10,PSD.fAug10,PSD.gAug10,PSD.hAug10,PSD.iAug10,PSD.kAug10,PSD.mAug10	uc001kve.1,uc001kvf.1,uc001kvg.1,uc001kvh.1,uc009xxd.1	1.31041	0.0560086
6:137528214:+,6:137540380:+	1.38518	2.2255	8.08554	1.59426e-10	8.72355e-09	13.7809	IFNGR1	core	NM_000416	ENST00000367739,ENST00000418947,ENST00000458076,ENST00000478333	IFNGR1.aAug10,IFNGR1.cAug10,IFNGR1.eAug10,IFNGR1.lAug10	uc003qho.2	1.39876	-0.0135782
7:24911414:+,7:24911572:+	1.40679	2.07496	8.07978	1.62657e-10	8.89062e-09	13.7857	OSBPL3	core	NM_015550,NM_145320,NM_145321,NM_145322	ENST00000313367,ENST00000352860,ENST00000353930,ENST00000396429,ENST00000396431,ENST00000409069,ENST00000409452,ENST00000409555,ENST00000409759,ENST00000409863,ENST00000415162,ENST00000431825,ENST00000441059	OSBPL3.aAug10,OSBPL3.bAug10,OSBPL3.cAug10,OSBPL3.dAug10,OSBPL3.eAug10,OSBPL3.fAug10,OSBPL3.iAug10	uc003sxd.2,uc003sxe.2,uc003sxf.2,uc003sxg.2,uc003sxh.2,uc003sxi.2	1.34571	0.0610806
2:149799274:+,2:149803413:+	1.20019	3.0587	8.07542	1.6514e-10	9.00178e-09	13.8484	KIF5C	core	NM_004522	ENST00000334436,ENST00000414838,ENST00000435030	KIF5C.aAug10	uc010zbu.1	1.0984	0.101789
3:186792121:+,3:186793350:+	1.5204	1.99124	8.06363	1.72062e-10	9.34861e-09	13.6579	ST6GAL1	core	NM_003032,NM_173216,NM_173217	ENST00000169298,ENST00000442023,ENST00000448044,ENST00000448449,ENST00000457772,ENST00000470633	ST6GAL1.aAug10,ST6GAL1.bAug10,ST6GAL1.cAug10,ST6GAL1.dAug10,ST6GAL1.eAug10,ST6GAL1.hAug10,ST6GAL1.iAug10,ST6GAL1.jAug10	uc003frb.2,uc003frc.2,uc003frd.2	1.40289	0.117516
6:144904736:+,6:144999542:+	1.33535	1.73197	8.05835	1.75253e-10	9.50652e-09	13.7305	UTRN	extended	None	ENST00000367526	UTRN.gAug10	None	0.847478	0.487874
1:155231525:+,1:155231877:+	1.10635	2.70934	8.05277	1.7869e-10	9.67202e-09	13.7762	SCAMP3	core	NM_005698	ENST00000302631,ENST00000480219	SCAMP3.aAug10,SCAMP3.bAug10,SCAMP3.eAug10,SCAMP3.fAug10,SCAMP3.gAug10,SCAMP3.iAug10,SCAMP3.jAug10,SCAMP3.kAug10,SCAMP3.lAug10,SCAMP3.nAug10,SCAMP3.sAug10	uc001fjs.2,uc001fju.2,uc001fjv.2	0.960274	0.146078
5:112364753:+,5:112379227:+	1.06068	2.89762	8.03752	1.88438e-10	1.01285e-08	13.7286	MCC	core	NM_001085377,NM_002387	ENST00000302475,ENST00000408903,ENST00000515367	MCC.aAug10,MCC.bAug10,MCC.cAug10,MCC.eAug10,MCC.lAug10	uc003kqj.3,uc003kqk.3,uc003kql.3	1.22735	-0.166675
1:156222295:+,1:156222710:+	1.02725	3.23136	8.01475	2.03992e-10	1.08368e-08	13.6424	SMG5	core	NM_015327	ENST00000361813,ENST00000420555	SMG5.aAug10,SMG5.cAug10,SMG5.eAug10	uc001foc.3	1.08943	-0.0621808
4:15688085:+,4:15688624:+	1.77817	1.65719	8.00523	2.10878e-10	1.11671e-08	13.3642	FAM200B	extended	None	ENST00000502856,ENST00000503600,ENST00000504598,ENST00000504823,ENST00000506610,ENST00000507305,ENST00000508567,ENST00000510186,ENST00000510920,ENST00000513053,ENST00000515697	FAM200BandBST1.iAug10,FAM200BandBST1.jAug10,FAM200BandBST1.oAug10,FAM200BandBST1.pAug10,FAM200BandBST1.rAug10,FAM200BandBST1.sAug10,FAM200BandBST1.uAug10,FAM200BandBST1.vfAug10,FAM200BandBST1.vgAug10,FAM200BandBST1.vhAug10	None	0.377762	1.40041
12:115118951:+,12:115120617:+	1.28052	2.85118	8.00426	2.11589e-10	1.11929e-08	13.6101	TBX3	core	NM_005996,NM_016569	ENST00000257566,ENST00000349155,ENST00000361100,ENST00000552054	TBX3.aAug10,TBX3.bAug10,TBX3.cAug10	uc001tvt.1,uc001tvu.1,uc010syw.1	1.07314	0.207381
5:83525702:+,5:83549902:+	1.22972	2.36866	7.99551	2.18145e-10	1.15214e-08	13.5568	EDIL3	core	NM_005711	ENST00000296591	EDIL3.cAug10	uc003kio.1	1.26206	-0.0323448
21:40191690:+,21:40193510:+	1.92297	1.31811	7.99424	2.19109e-10	1.15663e-08	13.0547	ETS2	core	NM_001256295,NM_005239	ENST00000360214,ENST00000360938	ETS2.aAug10,ETS2.bAug10	uc002yxf.2,uc002yxg.2	1.78155	0.141419
1:12042171:+,1:12049222:+	1.43439	2.36532	7.98685	2.24829e-10	1.18321e-08	13.4643	MFN2	core	NM_014874	ENST00000235329,ENST00000376337,ENST00000490079,ENST00000497302	MFN2.bAug10,MFN2.dAug10,MFN2.eAug10,MFN2.iAug10,MFN2.mAug10,MFN2.nAug10,MFN2.rAug10	uc001atn.3	0.915216	0.519176
7:93551545:+,7:93555403:+	2.222	0.669657	7.97932	2.30814e-10	1.2114e-08	12.6219	GNG11	core	NM_004126	ENST00000248564	GNG11.aAug10	uc003und.2	2.22345	-0.00144543
16:58538553:+,16:58540291:+	1.27735	2.35484	7.96853	2.39662e-10	1.25455e-08	13.4791	NDRG4	core	NM_001130487,NM_001242833,NM_001242834,NM_001242835,NM_001242836,NM_020465,NM_022910,NR_040072	ENST00000258187,ENST00000356752,ENST00000394279,ENST00000394282,ENST00000421602	NDRG4.aAug10,NDRG4.bAug10,NDRG4.cAug10,NDRG4.dAug10,NDRG4.eAug10,NDRG4.fAug10,NDRG4.gAug10,NDRG4.hAug10,NDRG4.iAug10,NDRG4.jAug10,NDRG4.kAug10,NDRG4.lAug10,NDRG4.mAug10,NDRG4.nAug10,NDRG4.oAug10,NDRG4.qAug10,NDRG4.vgAug10,NDRG4.vjAug10,NDRG4.vkAug10,NDRG4.voAug10	uc002enk.2,uc002enm.2,uc002eno.2,uc002enp.2,uc010cdk.2,uc010vif.1,uc010vig.1,uc010vih.1,uc010vii.1	1.2716	0.00574073
7:111422980:+,7:111423913:+	2.43199	0.580657	7.9669	2.41033e-10	1.26107e-08	12.3712	DOCK4	core	NM_014705	ENST00000342288,ENST00000352877,ENST00000417165,ENST00000423057,ENST00000428084,ENST00000437129,ENST00000437633,ENST00000445943,ENST00000450156,ENST00000464338,ENST00000492436,ENST00000494651	DOCK4.aAug10,DOCK4.bAug10,DOCK4.cAug10,DOCK4.eAug10,DOCK4.fAug10,DOCK4.kAug10,DOCK4.lAug10,DOCK4.nAug10	uc003vfw.2,uc003vfx.2,uc003vfy.2,uc011kml.1,uc011kmm.1	1.92237	0.509613
21:19165898:+,21:19167525:+	1.368	1.99121	7.9629	2.44415e-10	1.27676e-08	13.3774	C21orf91	core	NM_001100420	ENST00000284881	C21orf91.bAug10	uc002yko.3	1.41769	-0.0496851
6:137522145:+,6:137524636:+	1.42632	2.22308	7.95705	2.49456e-10	1.30039e-08	13.3279	IFNGR1	core	NM_000416	ENST00000367739,ENST00000418947,ENST00000543628	IFNGR1.aAug10,IFNGR1.bAug10,IFNGR1.cAug10	uc003qho.2,uc011edm.1	1.39876	0.0275584
12:56137545:+,12:56142370:+	1.06071	2.55519	7.9526	2.53363e-10	1.3187e-08	13.4415	GDF11	core	NM_005811	ENST00000257868,ENST00000546799	GDF11.aAug10,GDF11.bAug10	uc001shq.2,uc010spv.1	1.05399	0.00672078
2:149830025:+,2:149835436:+	1.07806	3.08667	7.94305	2.61945e-10	1.35563e-08	13.4066	KIF5C	core	NM_004522	ENST00000334436,ENST00000397413,ENST00000414838,ENST00000435030,ENST00000464066	KIF5C.aAug10,KIF5C.bAug10,KIF5C.cAug10	uc002tws.1,uc010zbu.1	1.0984	-0.0203387
16:58534173:+,16:58537702:+	1.25289	2.16791	7.93393	2.70422e-10	1.39446e-08	13.3382	NDRG4	core	NM_001242835,NM_001242836	None	NDRG4.fAug10,NDRG4.gAug10,NDRG4.hAug10,NDRG4.sAug10,NDRG4.vdAug10	uc002eno.2,uc002enp.2,uc010cdk.2	1.2716	-0.0187181
10:104163742:+,10:104164340:+	1.23103	2.16635	7.9217	2.82213e-10	1.44697e-08	13.3118	PSD	core	NM_002779	ENST00000020673,ENST00000406432,ENST00000541902	PSD.aAug10,PSD.bAug10,PSD.cAug10,PSD.dAug10,PSD.fAug10,PSD.gAug10,PSD.hAug10,PSD.kAug10,PSD.mAug10,PSD.nAug10	uc001kvf.1,uc001kvg.1,uc001kvh.1,uc009xxd.1	1.31041	-0.0793753
7:80380652:+,7:80387647:+	3.10992	0.358207	7.91347	2.90436e-10	1.4809e-08	11.4788	SEMA3C	core	NM_006379	ENST00000265361,ENST00000419255,ENST00000544525	SEMA3C.aAug10,SEMA3C.bAug10	uc003uhj.2,uc011kgw.1	2.72675	0.383169
7:80427552:+,7:80430073:+	2.55079	0.445371	7.90072	3.03668e-10	1.54287e-08	11.8579	SEMA3C	core	NM_006379	ENST00000265361,ENST00000419255,ENST00000458729,ENST00000536800,ENST00000544525	SEMA3C.aAug10,SEMA3C.bAug10,SEMA3C.cAug10	uc003uhj.2,uc011kgw.1,uc011kgx.1	2.72675	-0.175956
12:51347875:+,12:51354751:+	1.67204	0.703764	7.88917	3.16169e-10	1.59909e-08	12.9094	HIGD1C	core	NM_001109619	ENST00000398455	HIGD1C.aAug10	uc010smw.1	1.54905	0.122993
7:111629218:+,7:111634190:+	2.07925	0.754452	7.88295	3.23114e-10	1.63175e-08	12.4674	DOCK4	core	NM_014705	ENST00000342288,ENST00000352877,ENST00000428084,ENST00000437633,ENST00000445943,ENST00000468571,ENST00000476846,ENST00000544250	DOCK4.aAug10,DOCK4.bAug10,DOCK4.dAug10,DOCK4.gAug10,DOCK4.iAug10	uc003vfx.2,uc003vfy.2,uc003vga.1,uc003vgb.1,uc010ljt.1	1.92237	0.15688
5:112440052:+,5:112458381:+	1.15045	2.5733	7.87453	3.32765e-10	1.67542e-08	13.1628	MCC	core	NM_001085377,NM_002387	ENST00000302475,ENST00000408903,ENST00000502648,ENST00000506605,ENST00000511847,ENST00000514701,ENST00000515367	MCC.aAug10,MCC.bAug10,MCC.cAug10,MCC.dAug10,MCC.eAug10,MCC.gAug10	uc003kqj.3,uc003kqk.3,uc003kql.3,uc010jcd.1,uc011cwb.1	1.22735	-0.0769081
5:83550030:+,5:83680126:+	1.11711	2.5111	7.86893	3.39346e-10	1.70428e-08	13.1528	EDIL3	core	NM_005711	ENST00000296591,ENST00000380138	EDIL3.cAug10,EDIL3.dAug10	uc003kio.1,uc003kip.1	1.26206	-0.144955
12:15739985:+,12:15742389:+	1.12474	2.48008	7.86811	3.40319e-10	1.70831e-08	13.1472	PTPRO	core	NM_002848,NM_030667,NM_030668,NM_030669,NM_030670,NM_030671	ENST00000281171,ENST00000348962,ENST00000442921,ENST00000445537,ENST00000542557,ENST00000544244	PTPRO.aAug10,PTPRO.bAug10,PTPRO.dAug10,PTPRO.eAug10,PTPRO.fAug10,PTPRO.gAug10	uc001rcv.1,uc001rcw.1,uc001rcx.1,uc001rcy.1,uc001rcz.1,uc001rda.1	0.921378	0.203365
1:99358660:+,1:99380342:+	1.0376	2.91021	7.86747	3.41082e-10	1.71109e-08	13.1527	LPPR5	core	NM_001037317	ENST00000263177	LPPR5.aAug10	uc001dsb.2	1.16999	-0.132398
2:149847712:+,2:149850935:+	1.1498	2.89405	7.85038	3.62078e-10	1.80308e-08	13.0836	KIF5C	core	NM_004522	ENST00000334436,ENST00000397413,ENST00000414838,ENST00000435030,ENST00000460377,ENST00000464066	KIF5C.aAug10,KIF5C.bAug10,KIF5C.cAug10,KIF5C.eAug10	uc002tws.1,uc002twt.2,uc010zbu.1	1.0984	0.0513971
1:99767453:+,1:99771241:+	1.17385	2.27158	7.82857	3.90771e-10	1.93158e-08	13.0023	LPPR4	core	NM_014839	ENST00000263178,ENST00000370184,ENST00000370185	LPPR4.aAug10	uc001dse.2	1.32678	-0.152934
X:70430053:+,X:70549062:+	1.01712	3.42624	7.82271	3.98861e-10	1.96672e-08	12.9968	BCYRN1	core	NR_001568	None	None	None	1.02059	-0.00347106
7:111418425:+,7:111422920:+	2.23111	0.619751	7.8192	4.03793e-10	1.98713e-08	12.093	DOCK4	core	NM_014705	ENST00000342288,ENST00000352877,ENST00000417165,ENST00000423057,ENST00000428084,ENST00000437129,ENST00000437633,ENST00000445943,ENST00000450156,ENST00000464338,ENST00000492436,ENST00000494651	DOCK4.aAug10,DOCK4.bAug10,DOCK4.cAug10,DOCK4.eAug10,DOCK4.fAug10,DOCK4.kAug10,DOCK4.lAug10,DOCK4.nAug10	uc003vfw.2,uc003vfx.2,uc003vfy.2,uc011kml.1,uc011kmm.1	1.92237	0.308735
1:151680124:+,1:151680268:+	2.18277	0.881135	7.8078	4.20222e-10	2.06392e-08	12.0907	CELF3	core	NM_001172648,NM_001172649,NM_007185	ENST00000290583,ENST00000290585,ENST00000368833,ENST00000392706,ENST00000419910,ENST00000420342,ENST00000470688,ENST00000479893	CELF3.aAug10,CELF3.bAug10,CELF3.cAug10,CELF3.dAug10,CELF3.eAug10,CELF3.fAug10,CELF3.gAug10	uc001eyr.2,uc001eys.1,uc001eyt.2,uc009wmx.1,uc009wmy.2,uc010pdh.1	2.01186	0.170906
2:149857038:+,2:149857236:+	1.18135	2.80873	7.80755	4.20601e-10	2.06478e-08	12.9315	KIF5C	core	NM_004522	ENST00000334436,ENST00000397413,ENST00000414838,ENST00000435030,ENST00000464066,ENST00000482151	KIF5C.aAug10,KIF5C.bAug10,KIF5C.dAug10	uc002tws.1,uc002twu.1,uc010zbu.1	1.0984	0.0829448
7:121011477:+,7:121012164:+	1.03945	2.93075	7.80575	4.23254e-10	2.07577e-08	12.9422	FAM3C	core	NM_001040020,NM_014888	ENST00000359943,ENST00000412653,ENST00000426156,ENST00000455828	FAM3C.aAug10,FAM3C.bAug10,FAM3C.cAug10,FAM3C.dAug10,FAM3C.eAug10,FAM3C.fAug10,FAM3C.gAug10	uc003vjx.2,uc010lkm.2	1.05921	-0.0197616
1:99762423:+,1:99764591:+	1.08497	2.46121	7.80537	4.23817e-10	2.07751e-08	12.9398	LPPR4	core	NM_001166252,NM_014839	ENST00000263178,ENST00000370185,ENST00000457765	LPPR4.aAug10,LPPR4.bAug10	uc001dse.2,uc010oue.1	1.32678	-0.241818
7:150932698:+,7:150933494:+	1.2571	2.35846	7.80418	4.25587e-10	2.08415e-08	12.9198	CHPF2	core	NM_019015	ENST00000035307,ENST00000377851,ENST00000465601,ENST00000495645	CHPF2.aAug10,CHPF2.bAug10,CHPF2.fAug10	uc003wjq.1,uc003wjr.1	1.0545	0.202594
3:78796050:+,3:78987751:+	1.2065	2.41675	7.79595	4.38017e-10	2.13875e-08	12.8838	ROBO1	core	NM_001145845,NM_002941,NM_133631	ENST00000398412,ENST00000398414,ENST00000436010,ENST00000464233,ENST00000467549,ENST00000495273	ROBO1.aAug10,ROBO1.bAug10,ROBO1.cAug10,ROBO1.dAug10	uc003dqb.2,uc003dqc.2,uc003dqd.2,uc003dqe.2	0.805109	0.401389
8:27097679:+,8:27098571:+	2.51301	1.32799	7.77098	4.7804e-10	2.30831e-08	11.5565	STMN4	core	NM_030795	ENST00000265770,ENST00000350889,ENST00000519614,ENST00000519997,ENST00000522908,ENST00000523048	STMN4.aAug10,STMN4.bAug10,STMN4.cAug10,STMN4.dAug10,STMN4.eAug10,STMN4.fAug10,STMN4.gAug10,STMN4.iAug10	uc003xfj.2,uc003xfk.2,uc010luo.2,uc011lai.1,uc011laj.1,uc011lak.1	2.3291	0.183904
11:20805376:+,11:20869129:+	1.86275	0.67989	7.76888	4.8156e-10	2.32378e-08	12.3662	NELL1	core	NM_006157,NM_201551	ENST00000298925,ENST00000357134,ENST00000527873,ENST00000528046,ENST00000529595,ENST00000532434	NELL1.aAug10,NELL1.bAug10,NELL1.cAug10,NELL1.fAug10,NELL1.hAug10,NELL1.iAug10,NELL1.jAug10	uc001mqe.2,uc001mqf.2,uc009yid.2	1.41287	0.449888
4:119679000:+,4:119685957:+	1.01677	2.84433	7.7688	4.81706e-10	2.32378e-08	12.8189	SEC24D	core	NM_014822	ENST00000280551,ENST00000379735,ENST00000509818,ENST00000511481	SEC24D.aAug10,SEC24D.bAug10,SEC24D.cAug10,SEC24D.dAug10,SEC24D.gAug10	uc003ici.3,uc003icj.3,uc010imz.1	1.08439	-0.0676218
1:155850411:+,1:155850989:+	2.32419	1.07297	7.76082	4.95344e-10	2.38041e-08	11.8473	SYT11	novel	NONE	NONE	NONE	NONE	1.75828	0.56591
5:112437642:+,5:112439889:+	1.0744	2.86024	7.7495	5.15378e-10	2.46212e-08	12.7535	MCC	core	NM_001085377,NM_002387	ENST00000302475,ENST00000408903,ENST00000502648,ENST00000505604,ENST00000506605,ENST00000511847,ENST00000514701,ENST00000515367	MCC.aAug10,MCC.bAug10,MCC.cAug10,MCC.dAug10,MCC.fAug10,MCC.gAug10	uc003kqj.3,uc003kql.3,uc010jcd.1,uc011cwb.1	1.22735	-0.15295
7:55873083:+,7:55874783:+	1.3827	2.00253	7.74933	5.15684e-10	2.46212e-08	12.6493	2019-09-14	core	NM_207366	ENST00000388975	SEPT14.aAug10,SEPT14.bAug10	uc003tqz.2	1.65175	-0.269047
5:146030287:+,5:146070691:+	1.66821	1.98176	7.73343	5.45236e-10	2.58058e-08	12.4016	PPP2R2B	core	NM_001127381,NM_004576,NM_181674,NM_181675,NM_181676,NM_181677,NM_181678	ENST00000336640,ENST00000356826,ENST00000394409,ENST00000394410,ENST00000394411,ENST00000394413,ENST00000394414,ENST00000453001,ENST00000504198,ENST00000508545,ENST00000512639,ENST00000530902	PPP2R2B.aAug10,PPP2R2B.bAug10,PPP2R2B.cAug10,PPP2R2B.dAug10,PPP2R2B.eAug10,PPP2R2B.fAug10,PPP2R2B.gAug10,PPP2R2B.hAug10,PPP2R2B.iAug10,PPP2R2B.jAug10,PPP2R2B.lAug10,PPP2R2B.vkAug10	uc003loe.2,uc003lof.3,uc003log.3,uc003loh.3,uc003loi.3,uc003loj.3,uc003lok.3,uc010jgm.2,uc011dbu.1,uc011dbv.1	1.87928	-0.21107
5:14492923:+,5:14496988:+	1.13873	2.91241	7.73147	5.48995e-10	2.59714e-08	12.6863	TRIO	core	NM_007118	ENST00000344135,ENST00000344204,ENST00000503399,ENST00000512070,ENST00000513206,ENST00000537187	TRIO.aAug10,TRIO.bAug10,TRIO.eAug10,TRIO.fAug10,TRIO.iAug10,TRIO.jAug10,TRIO.kAug10	uc003jff.2,uc003jfg.2	0.614629	0.5241
2:131897848:+,2:131904210:+	1.08041	2.91473	7.73121	5.49484e-10	2.59823e-08	12.6883	PLEKHB2	core	NM_001100623,NM_017958	ENST00000234115,ENST00000403716,ENST00000409158,ENST00000409279,ENST00000409612,ENST00000439822,ENST00000538982	PLEKHB2.cAug10,PLEKHB2.dAug10,PLEKHB2.eAug10,PLEKHB2.fAug10,PLEKHB2.gAug10,PLEKHB2.hAug10,PLEKHB2.iAug10,PLEKHB2.kAug10,PLEKHB2.lAug10,PLEKHB2.mAug10,PLEKHB2.oAug10,PLEKHB2.pAug10,PLEKHB2.qAug10,PLEKHB2.rAug10	uc002tsf.3,uc002tsg.3,uc002tsi.3,uc002tsj.3,uc010zao.1,uc010zaq.1	0.869684	0.210727
16:425435:+,16:426136:+	1.65373	1.61425	7.72969	5.52419e-10	2.61088e-08	12.4609	TMEM8A	core	NM_021259	ENST00000250930,ENST00000382942,ENST00000431232,ENST00000475348	TMEM8A.aAug10,TMEM8A.bAug10,TMEM8A.cAug10,TMEM8A.dAug10	uc002cgu.3,uc002cgv.3	1.50184	0.151887
7:107875132:+,7:107878196:+	1.73492	1.11094	7.72921	5.53362e-10	2.61287e-08	12.3452	NRCAM	core	NM_001037132,NM_001193582,NM_001193583,NM_001193584	ENST00000379024,ENST00000379028,ENST00000418239,ENST00000425651,ENST00000442580	NRCAM.aAug10,NRCAM.bAug10,NRCAM.dAug10,NRCAM.eAug10,NRCAM.jAug10,NRCAM.kAug10,NRCAM.sAug10	uc003vfb.2,uc003vfd.2,uc003vfe.2,uc011kmk.1	0.321861	1.41306
2:149851052:+,2:149853778:+	1.12257	2.85998	7.72889	5.53981e-10	2.61333e-08	12.6736	KIF5C	core	NM_004522	ENST00000334436,ENST00000397413,ENST00000414838,ENST00000435030,ENST00000460377,ENST00000464066	KIF5C.aAug10,KIF5C.bAug10,KIF5C.cAug10,KIF5C.eAug10	uc002tws.1,uc002twt.2,uc010zbu.1	1.0984	0.0241631
7:83631362:+,7:83634655:+	1.25427	1.62011	7.7268	5.58044e-10	2.62878e-08	12.6524	SEMA3A	core	NM_006080	ENST00000265362,ENST00000436949	SEMA3A.aAug10	uc003uhz.2	1.12314	0.131125
2:149818633:+,2:149829850:+	1.06989	3.05851	7.7242	5.6316e-10	2.64667e-08	12.6668	KIF5C	core	NM_004522	ENST00000334436,ENST00000397413,ENST00000414838,ENST00000435030,ENST00000464066	KIF5C.aAug10,KIF5C.bAug10,KIF5C.cAug10,KIF5C.gAug10	uc002tws.1,uc010zbu.1	1.0984	-0.0285109
8:27100009:+,8:27101228:+	2.6998	1.13262	7.72314	5.65258e-10	2.6528e-08	11.1445	STMN4	core	NM_030795	ENST00000265770,ENST00000350889,ENST00000519614,ENST00000522750,ENST00000522908,ENST00000523048	STMN4.aAug10,STMN4.bAug10,STMN4.cAug10,STMN4.dAug10,STMN4.eAug10,STMN4.gAug10,STMN4.hAug10,STMN4.jAug10,STMN4.kAug10	uc003xfj.2,uc003xfk.2,uc010luo.2,uc011lai.1,uc011lak.1	2.3291	0.370703
7:111509711:+,7:111512046:+	2.4314	0.549567	7.7189	5.73724e-10	2.68499e-08	11.6036	DOCK4	core	NM_014705	ENST00000342288,ENST00000352877,ENST00000423057,ENST00000428084,ENST00000437633,ENST00000445943,ENST00000476846,ENST00000492532,ENST00000544250	DOCK4.aAug10,DOCK4.bAug10,DOCK4.cAug10,DOCK4.dAug10,DOCK4.oAug10	uc003vfw.2,uc003vfx.2,uc003vfy.2,uc003vga.1	1.92237	0.509029
12:71139866:+,12:71147971:+	1.17817	2.27829	7.71515	5.81299e-10	2.71536e-08	12.6188	PTPRR	core	NM_001207015,NM_001207016,NM_002849,NM_130846	ENST00000283228,ENST00000342084,ENST00000378778,ENST00000440835,ENST00000548220,ENST00000549308,ENST00000550661,ENST00000551219	PTPRR.aAug10,PTPRR.bAug10,PTPRR.cAug10,PTPRR.dAug10,PTPRR.eAug10,PTPRR.fAug10,PTPRR.hAug10	uc001swh.1,uc001swi.1,uc009zrs.2,uc010stq.1,uc010str.1	1.25745	-0.0792773
5:141694720:+,5:141704409:+	1.48272	1.8386	7.70265	6.07354e-10	2.81477e-08	12.4252	SPRY4	core	NM_001127496	ENST00000434127	SPRY4.cAug10	uc003lml.2	1.48212	0.000603001
10:90708710:+,10:90712488:+	2.75791	0.70587	7.70221	6.08285e-10	2.81779e-08	10.8814	ACTA2	core	NM_001613	ENST00000224784,ENST00000480297,ENST00000482085,ENST00000488967	ACTA2.bAug10,ACTA2.fAug10,ACTA2.jAug10,ACTA2.kAug10,ACTA2.qAug10,ACTA2.rAug10	uc001kfp.2,uc010qmz.1	3.50692	-0.749014
6:47254331:+,6:47277152:+	1.94657	1.5696	7.69817	6.16959e-10	2.8527e-08	12.0963	TNFRSF21	core	NM_014452	ENST00000296861	TNFRSF21.aAug10,TNFRSF21.bAug10	uc003oyv.2	1.45888	0.487685
4:119666215:+,4:119673151:+	1.16674	2.52137	7.69781	6.17737e-10	2.85498e-08	12.5718	SEC24D	core	NM_014822	ENST00000280551,ENST00000379735,ENST00000419654,ENST00000429811,ENST00000505134,ENST00000511033,ENST00000511481,ENST00000514561	SEC24D.aAug10,SEC24D.bAug10,SEC24D.cAug10,SEC24D.dAug10,SEC24D.eAug10,SEC24D.fAug10,SEC24D.pAug10	uc003ich.3,uc003ici.3,uc003icj.3,uc003icl.2	1.08439	0.0823457
10:104164484:+,10:104164655:+	1.0108	2.49028	7.69666	6.2024e-10	2.8639e-08	12.5741	PSD	core	NM_002779	ENST00000020673,ENST00000406432,ENST00000541902	PSD.aAug10,PSD.bAug10,PSD.cAug10,PSD.dAug10,PSD.fAug10,PSD.gAug10,PSD.hAug10,PSD.iAug10,PSD.lAug10	uc001kve.1,uc001kvf.1,uc001kvg.1,uc001kvh.1,uc009xxd.1	1.31041	-0.299603
6:47202634:+,6:47220992:+	1.58054	2.00883	7.67991	6.5775e-10	3.01626e-08	12.3141	TNFRSF21	core	NM_014452	ENST00000296861,ENST00000419206	TNFRSF21.aAug10,TNFRSF21.bAug10	uc003oyv.2	1.45888	0.121658
10:33491923:+,10:33496500:+	1.0279	2.78133	7.67736	6.63658e-10	3.0378e-08	12.5088	NRP1	core	NM_001024628,NM_001244972,NM_001244973,NM_003873,NR_045259	ENST00000265371,ENST00000374814,ENST00000374822,ENST00000374823,ENST00000374828,ENST00000374867,ENST00000374875,ENST00000395995,ENST00000431894	NRP1.aAug10,NRP1.bAug10,NRP1.cAug10,NRP1.dAug10,NRP1.eAug10,NRP1.fAug10,NRP1.gAug10,NRP1.oAug10,NRP1.sAug10	uc001iwv.3,uc001iww.3,uc001iwx.3,uc001iwy.3,uc001iwz.2,uc001ixb.1,uc009xlz.2	0.506629	0.521272
1:151680411:+,1:151681474:+	1.92315	1.01771	7.67607	6.6668e-10	3.04745e-08	11.9296	CELF3	core	NM_001172648,NM_001172649,NM_007185	ENST00000290583,ENST00000290585,ENST00000368833,ENST00000419910,ENST00000420342,ENST00000470688,ENST00000479893	CELF3.aAug10,CELF3.bAug10,CELF3.cAug10,CELF3.dAug10,CELF3.eAug10,CELF3.fAug10,CELF3.gAug10,CELF3.hAug10	uc001eyr.2,uc001eys.1,uc001eyt.2,uc009wmx.1,uc009wmy.2	2.01186	-0.0887184
5:170457168:+,5:170597134:+	1.57468	0.304524	7.67331	6.73171e-10	3.07292e-08	12.2813	RANBP17	novel	NONE	NONE	NONE	NONE	0.379644	1.19504
5:161277890:+,5:161281164:+	2.0328	0.346371	7.64861	7.341e-10	3.32081e-08	11.774	GABRA1	core	NM_000806,NM_001127643,NM_001127644,NM_001127645,NM_001127646,NM_001127647,NM_001127648	ENST00000023897,ENST00000393943,ENST00000420560,ENST00000428797,ENST00000437025,ENST00000444819,ENST00000519621,ENST00000521339,ENST00000522651	GABRA1.aAug10,GABRA1.bAug10,GABRA1.cAug10,GABRA1.dAug10,GABRA1.eAug10,GABRA1.fAug10,GABRA1.gAug10,GABRA1.hAug10	uc003lyx.3,uc010jiw.2,uc010jix.2,uc010jiy.2,uc010jiz.2,uc010jja.2,uc010jjb.2	1.9971	0.0356987
11:20939800:+,11:20940798:+	1.67445	0.800481	7.64691	7.38496e-10	3.3348e-08	12.1289	NELL1	core	NM_006157,NM_201551	ENST00000298925,ENST00000325319,ENST00000357134,ENST00000527873,ENST00000532434	NELL1.aAug10,NELL1.bAug10,NELL1.cAug10,NELL1.dAug10,NELL1.fAug10	uc001mqe.2,uc001mqf.2,uc009yid.2,uc010rdo.1	1.41287	0.261589
7:80378344:+,7:80380585:+	2.48876	0.559029	7.6469	7.38524e-10	3.3348e-08	11.45	SEMA3C	core	NM_006379	ENST00000265361,ENST00000419255,ENST00000544525	SEMA3C.aAug10,SEMA3C.bAug10,SEMA3C.dAug10	uc003uhj.2,uc011kgw.1	2.72675	-0.237994
16:425256:+,16:425345:+	1.58076	1.52459	7.63307	7.75255e-10	3.48496e-08	12.1439	TMEM8A	core	NM_021259	ENST00000250930,ENST00000382942,ENST00000431232,ENST00000475348	TMEM8A.aAug10,TMEM8A.bAug10,TMEM8A.cAug10,TMEM8A.dAug10	uc002cgu.3,uc002cgv.3	1.50184	0.0789208
3:78676719:+,3:78680311:+	1.07437	2.67522	7.62963	7.84674e-10	3.52099e-08	12.3448	ROBO1	core	NM_001145845,NM_002941,NM_133631	ENST00000398412,ENST00000398414,ENST00000436010,ENST00000464233,ENST00000467549,ENST00000472273,ENST00000495273,ENST00000498428	ROBO1.aAug10,ROBO1.bAug10,ROBO1.cAug10,ROBO1.dAug10,ROBO1.eAug10,ROBO1.fAug10,ROBO1.iAug10	uc003dqb.2,uc003dqc.2,uc003dqd.2,uc003dqe.2,uc010hoh.2,uc011bgl.1	0.805109	0.269263
4:119736881:+,4:119738419:+	1.19663	2.24567	7.61844	8.16114e-10	3.649e-08	12.2849	SEC24D	core	NM_014822	ENST00000280551,ENST00000379735,ENST00000419654,ENST00000503683,ENST00000514561	SEC24D.aAug10,SEC24D.bAug10,SEC24D.cAug10,SEC24D.eAug10,SEC24D.kAug10,SEC24D.lAug10,SEC24D.oAug10	uc003ici.3,uc003icj.3,uc003icl.2	1.08439	0.112244
2:224463469:+,2:224463809:+	1.64811	1.51083	7.6177	8.18218e-10	3.65514e-08	12.1156	SCG2	extended	None	None	kymeebo.aAug10	None	1.13689	0.511216
4:119662192:+,4:119665143:+	1.02893	2.87455	7.61723	8.19572e-10	3.65956e-08	12.3012	SEC24D	core	NM_014822	ENST00000280551,ENST00000379735,ENST00000419654,ENST00000429811,ENST00000505134,ENST00000511481,ENST00000514561	SEC24D.aAug10,SEC24D.bAug10,SEC24D.cAug10,SEC24D.dAug10,SEC24D.eAug10,SEC24D.fAug10	uc003ich.3,uc003ici.3,uc003icj.3,uc003icl.2	1.08439	-0.0554649
17:59482130:+,17:59482563:+	1.29337	2.22872	7.60791	8.46839e-10	3.77459e-08	12.251	TBX2	core	NM_005994	ENST00000240328,ENST00000419047	TBX2.aAug10,TBX2.bAug10,TBX2.dAug10,TBX2.eAug10	uc002izg.2,uc010wox.1	0.975693	0.317677
11:118982084:+,11:118982231:+	1.52503	1.89964	7.60759	8.47808e-10	3.77723e-08	12.1057	C2CD2L	core	NM_014807	ENST00000336702,ENST00000525598,ENST00000528586,ENST00000529874	C2CD2L.aAug10,C2CD2L.bAug10,C2CD2L.cAug10,C2CD2L.dAug10,C2CD2L.eAug10	uc001pvn.2,uc001pvo.2	1.13942	0.38561
7:107112747:+,7:107114480:+	1.66759	1.201	7.60375	8.59307e-10	3.82336e-08	11.954	COG5,GPR22	core	NM_005295	ENST00000304402	GPR22.aAug10	uc003vef.2	1.6883	-0.0207173
1:163157923:+,1:163172582:+	1.25303	1.93734	7.60158	8.65879e-10	3.84919e-08	12.2206	RGS5	extended	None	None	RGS5.uAug10	None	-0.102302	1.35534
3:186790735:+,3:186791947:+	1.37444	2.09395	7.59577	8.83727e-10	3.91966e-08	12.1518	ST6GAL1	core	NM_003032,NM_173216,NM_173217	ENST00000169298,ENST00000427315,ENST00000442023,ENST00000448044,ENST00000448449,ENST00000457772	ST6GAL1.aAug10,ST6GAL1.bAug10,ST6GAL1.cAug10,ST6GAL1.dAug10,ST6GAL1.eAug10,ST6GAL1.hAug10,ST6GAL1.iAug10,ST6GAL1.mAug10	uc003frb.2,uc003frc.2,uc003frd.2	1.40289	-0.0284449
11:26678028:+,11:26681809:+	5.63127	-2.33131	7.59141	8.97358e-10	3.96976e-08	5.84598	ANO3	core	NM_031418	ENST00000256737,ENST00000525139,ENST00000531568,ENST00000537978,ENST00000538001	ANO3.aAug10,ANO3.bAug10,ANO3.cAug10	uc001mqt.3,uc010rdr.1,uc010rds.1,uc010rdt.1	5.45906	0.172217
X:102585968:+,X:102586305:+	1.18866	2.11471	7.58605	9.14424e-10	4.04347e-08	12.176	TCEAL7	core	NM_152278	ENST00000332431,ENST00000372666	TCEAL7.aAug10,TCEAL7.bAug10,TCEAL7.dAug10	uc004ekc.1	1.11379	0.0748638
2:220400046:+,2:220401788:+	1.85607	1.35916	7.57325	9.56467e-10	4.1979e-08	11.6681	ACCN4	core	NM_018674,NM_182847	ENST00000347842,ENST00000358078,ENST00000474489	ACCN4.aAug10,ACCN4.bAug10,ACCN4.fAug10	uc002vlz.2,uc002vma.2,uc002vmb.2	1.73459	0.121485
7:111407174:+,7:111409585:+	2.53973	0.159743	7.56964	9.68701e-10	4.24382e-08	10.8605	DOCK4	core	NM_014705	ENST00000342288,ENST00000352877,ENST00000423057,ENST00000428053,ENST00000428084,ENST00000437129,ENST00000437633,ENST00000445943,ENST00000450156,ENST00000492436,ENST00000494651	DOCK4.aAug10,DOCK4.bAug10,DOCK4.cAug10,DOCK4.eAug10,DOCK4.fAug10,DOCK4.jAug10,DOCK4.kAug10,DOCK4.lAug10	uc003vfw.2,uc003vfx.2,uc003vfy.2,uc011kml.1,uc011kmm.1	1.92237	0.617357
19:18497276:+,19:18499096:+	5.62042	-1.5698	7.55934	1.00438e-09	4.37943e-08	5.79116	GDF15	core	NM_004864	ENST00000252809	GDF15.aAug10,GDF15.bAug10	uc002niv.2	5.62181	-0.0013936
10:104165293:+,10:104166980:+	1.22342	1.89088	7.55625	1.01537e-09	4.42157e-08	12.069	PSD	core	NM_002779	ENST00000020673,ENST00000406432,ENST00000461698,ENST00000541902	PSD.aAug10,PSD.bAug10,PSD.cAug10,PSD.dAug10,PSD.fAug10	uc001kvf.1,uc001kvg.1,uc001kvh.1,uc009xxd.1	1.31041	-0.0869828
5:14485355:+,5:14487573:+	1.04055	2.99972	7.54822	1.04442e-09	4.53036e-08	12.0703	TRIO	core	NM_007118	ENST00000344204,ENST00000510281,ENST00000512070,ENST00000513206,ENST00000515144,ENST00000537187	TRIO.aAug10,TRIO.bAug10,TRIO.cAug10,TRIO.pAug10	uc003jff.2,uc003jfg.2,uc003jfh.1	0.614629	0.425916
5:170648844:+,5:170667932:+	1.51225	1.13814	7.54795	1.04543e-09	4.53082e-08	11.8998	RANBP17	core	NM_022897	ENST00000389118,ENST00000519256,ENST00000519949,ENST00000521759,ENST00000522066,ENST00000522533,ENST00000523189,ENST00000534916	RANBP17.aAug10,RANBP17.bAug10,RANBP17.cAug10,RANBP17.dAug10,RANBP17.eAug10,RANBP17.fAug10,RANBP17.hAug10	uc003mba.2,uc003mbb.2,uc003mbd.2,uc010jjs.2	0.379644	1.13261
6:166845978:+,6:166862212:+	1.57472	1.65573	7.54674	1.04985e-09	4.54576e-08	11.8496	RPS6KA2	core	NM_001006932,NM_021135	ENST00000265678,ENST00000405189,ENST00000481261,ENST00000503859,ENST00000510118	RNASET2andRPS6KA2.aAug10,RNASET2andRPS6KA2.bAug10,RNASET2andRPS6KA2.cAug10,RNASET2andRPS6KA2.dAug10,RNASET2andRPS6KA2.eAug10	uc003qvb.1,uc003qvc.1,uc003qvd.1,uc010kkl.1,uc011ego.1	1.39312	0.181604
7:111644186:+,7:111846157:+	2.24525	0.505529	7.54664	1.05024e-09	4.54576e-08	11.1445	DOCK4	core	NM_014705	ENST00000428084,ENST00000437633,ENST00000476846	DOCK4.aAug10,DOCK4.bAug10,DOCK4.dAug10,DOCK4.gAug10	uc003vfx.2,uc003vfy.2,uc003vga.1,uc010ljt.1	1.92237	0.322878
7:80456803:+,7:80457901:+	2.26528	0.619263	7.53934	1.07755e-09	4.64353e-08	11.2172	SEMA3C	core	NM_006379	ENST00000265361,ENST00000411788,ENST00000419255,ENST00000427167,ENST00000544525	SEMA3C.aAug10,SEMA3C.bAug10,SEMA3C.eAug10,SEMA3C.hAug10,SEMA3C.jAug10	uc003uhj.2,uc011kgw.1	2.72675	-0.461473
7:24854822:+,7:24856229:+	1.23683	2.08184	7.52545	1.13144e-09	4.84859e-08	11.9552	OSBPL3	core	NM_015550,NM_145320,NM_145321,NM_145322	ENST00000313367,ENST00000352860,ENST00000353930,ENST00000396429,ENST00000396431,ENST00000409069,ENST00000409452,ENST00000409555,ENST00000409759,ENST00000409863,ENST00000431825	OSBPL3.aAug10,OSBPL3.bAug10,OSBPL3.cAug10,OSBPL3.dAug10,OSBPL3.eAug10,OSBPL3.fAug10	uc003sxd.2,uc003sxe.2,uc003sxf.2,uc003sxg.2,uc003sxh.2,uc003sxi.2	1.34571	-0.108878
2:202259595:+,2:202260037:+	1.16815	2.2916	7.51964	1.15483e-09	4.92824e-08	11.9695	TRAK2	core	NM_015049	ENST00000332624,ENST00000542292	TRAK2andALS2CR12.aAug10	uc002uyb.3	1.09976	0.0683908
15:89631794:+,15:89656956:+	1.19536	2.57124	7.51605	1.16947e-09	4.98438e-08	11.9541	ABHD2	core	NM_152924	ENST00000352732	ABHD2.bAug10	uc002bnk.2	1.35802	-0.16266
5:170720985:+,5:170722891:+	1.24513	1.33802	7.51264	1.18359e-09	5.04027e-08	11.9107	RANBP17	core	NM_022897	ENST00000389118,ENST00000519949,ENST00000521759,ENST00000522066,ENST00000522533,ENST00000523189,ENST00000534916	RANBP17.aAug10,RANBP17.bAug10,RANBP17.cAug10,RANBP17.dAug10,RANBP17.eAug10,RANBP17.hAug10	uc003mba.2,uc003mbb.2,uc010jjs.2	0.379644	0.865489
5:170669824:+,5:170692685:+	1.25602	1.42775	7.50997	1.19474e-09	5.07911e-08	11.895	RANBP17	core	NM_022897	ENST00000389118,ENST00000519949,ENST00000521759,ENST00000521834,ENST00000522066,ENST00000522533,ENST00000523189,ENST00000534916	RANBP17.aAug10,RANBP17.bAug10,RANBP17.cAug10,RANBP17.dAug10,RANBP17.eAug10,RANBP17.hAug10,RANBP17.nAug10	uc003mba.2,uc003mbb.2,uc010jjs.2	0.379644	0.876372
6:33543705:+,6:33545312:+	1.14817	2.43678	7.50703	1.20716e-09	5.11241e-08	11.9173	BAK1	core	NM_001188	ENST00000360661,ENST00000374460,ENST00000374467,ENST00000442998	BAK1.aAug10,BAK1.bAug10,BAK1.cAug10,BAK1.eAug10,BAK1.gAug10,BAK1.hAug10	uc003oes.2,uc003oet.2,uc010jvb.2,uc011drj.1	0.990983	0.157186
4:148441130:+,4:148453658:+	1.83713	0.536609	7.50249	1.22662e-09	5.18198e-08	11.49	EDNRA	core	NM_001256283,NM_001957,NR_028596	ENST00000324300,ENST00000511804	EDNRA.aAug10,EDNRA.cAug10,EDNRA.hAug10	uc003iky.2,uc011cid.1	1.78243	0.0546985
4:95445026:+,4:95494502:+	1.00285	2.86531	7.49353	1.26589e-09	5.32735e-08	11.8842	PDLIM5	core	NM_001011513,NM_001011515,NM_001011516,NM_001256425,NM_001256426,NM_001256427,NM_006457,NR_024179	ENST00000317968,ENST00000318007,ENST00000380180,ENST00000437932,ENST00000450793,ENST00000503974,ENST00000508216,ENST00000508531,ENST00000509333,ENST00000509357,ENST00000510099,ENST00000513341,ENST00000514743,ENST00000514830,ENST00000538141	PDLIM5.aAug10,PDLIM5.bAug10,PDLIM5.cAug10,PDLIM5.dAug10,PDLIM5.eAug10,PDLIM5.hAug10,PDLIM5.iAug10,PDLIM5.jAug10,PDLIM5.kAug10,PDLIM5.lAug10,PDLIM5.mAug10,PDLIM5.oAug10,PDLIM5.rAug10,PDLIM5.vbAug10,PDLIM5.vdAug10	uc003htf.2,uc003htg.2,uc003hth.2,uc003hti.2,uc003htj.2,uc003htk.2,uc011cdx.1	1.06138	-0.0585324
11:26664881:+,11:26669256:+	5.5904	-2.0732	7.49288	1.26877e-09	5.33503e-08	5.753	ANO3	core	NM_031418	ENST00000256737,ENST00000525139,ENST00000531568,ENST00000537978,ENST00000538001	ANO3.aAug10,ANO3.bAug10,ANO3.cAug10,ANO3.dAug10	uc001mqt.3,uc010rdr.1,uc010rds.1,uc010rdt.1	5.45906	0.131345
1:151679210:+,1:151679983:+	2.1907	0.668391	7.46787	1.38545e-09	5.77958e-08	11.0054	CELF3	core	NM_001172649	ENST00000290585	CELF3.fAug10	uc009wmy.2	2.01186	0.17884
6:126211127:+,6:126211788:+	1.02845	2.69526	7.46769	1.38636e-09	5.78096e-08	11.7965	NCOA7	core	NM_001122842,NM_001199619,NM_001199620,NM_001199621,NM_181782	ENST00000229634,ENST00000368357,ENST00000392477,ENST00000431092	NCOA7.aAug10,NCOA7.bAug10,NCOA7.cAug10,NCOA7.dAug10,NCOA7.eAug10,NCOA7.fAug10	uc003qae.3,uc003qah.2,uc003qai.2,uc010kes.2,uc010ket.2	0.748426	0.280022
10:104164812:+,10:104164940:+	1.18648	2.16664	7.46475	1.40076e-09	5.83616e-08	11.7821	PSD	core	NM_002779	ENST00000020673,ENST00000406432,ENST00000473507,ENST00000479172,ENST00000541902	PSD.aAug10,PSD.bAug10,PSD.cAug10,PSD.dAug10,PSD.fAug10,PSD.gAug10,PSD.hAug10,PSD.iAug10,PSD.kAug10,PSD.lAug10,PSD.mAug10	uc001kve.1,uc001kvf.1,uc001kvg.1,uc001kvh.1,uc009xxd.1	1.31041	-0.123928
2:202254226:+,2:202254524:+	1.06928	2.15293	7.45735	1.43773e-09	5.95062e-08	11.7594	TRAK2	core	NM_015049	ENST00000332624,ENST00000542292	TRAK2andALS2CR12.aAug10	uc002uyb.3	1.09976	-0.0304802
7:83689874:+,7:83739786:+	1.19406	1.70857	7.45326	1.4586e-09	6.02704e-08	11.7383	SEMA3A	core	NM_006080	ENST00000265362,ENST00000436949	SEMA3A.aAug10	uc003uhz.2	1.12314	0.0709141
5:14497114:+,5:14497956:+	1.9682	1.26928	7.45105	1.46995e-09	6.0687e-08	11.1378	TRIO	extended	None	None	TRIO.fAug10,TRIO.kAug10	None	0.614629	1.35358
7:24856307:+,7:24859794:+	1.41565	1.81115	7.43479	1.55656e-09	6.39752e-08	11.6009	OSBPL3	core	NM_015550,NM_145320,NM_145321,NM_145322	ENST00000313367,ENST00000352860,ENST00000353930,ENST00000396429,ENST00000396431,ENST00000409069,ENST00000409452,ENST00000409555,ENST00000409759,ENST00000409863,ENST00000431825	OSBPL3.aAug10,OSBPL3.bAug10,OSBPL3.cAug10,OSBPL3.dAug10,OSBPL3.eAug10,OSBPL3.fAug10	uc003sxd.2,uc003sxe.2,uc003sxf.2,uc003sxg.2,uc003sxh.2,uc003sxi.2	1.34571	0.0699361
12:42859060:+,12:42859996:+	1.3556	1.79623	7.42971	1.58465e-09	6.49966e-08	11.6263	PRICKLE1	core	NM_001144881,NM_001144882,NM_001144883,NM_153026	ENST00000345127,ENST00000445766,ENST00000455697,ENST00000548696,ENST00000552240	PRICKLE1.aAug10,PRICKLE1.bAug10,PRICKLE1.cAug10,PRICKLE1.dAug10	uc001rnl.2,uc001rnm.2,uc010skv.1,uc010skw.1	1.51598	-0.160374
2:197004523:+,2:197005973:+	1.24386	1.85145	7.42345	1.61996e-09	6.63363e-08	11.6066	STK17B	core	NM_004226	ENST00000263955,ENST00000409228	STK17B.aAug10,STK17B.bAug10	uc002utk.2,uc010fsh.2	1.15512	0.088743
2:202264216:+,2:202265741:+	1.17768	2.19258	7.41975	1.6412e-09	6.71237e-08	11.6247	TRAK2	core	NM_015049	ENST00000332624,ENST00000430254,ENST00000542292	TRAK2andALS2CR12.aAug10,TRAK2andALS2CR12.fAug10	uc002uyb.3,uc002uyc.2	1.09976	0.0779115
6:126206489:+,6:126210118:+	1.24623	2.24308	7.41681	1.6583e-09	6.77402e-08	11.5826	NCOA7	core	NM_001122842,NM_001199621	ENST00000229634,ENST00000413085	NCOA7.dAug10,NCOA7.eAug10,NCOA7.fAug10	uc003qah.2,uc010ket.2	0.748426	0.4978
7:24892253:+,7:24901232:+	1.39233	1.69038	7.41645	1.66041e-09	6.7771e-08	11.5254	OSBPL3	core	NM_015550,NM_145320,NM_145321,NM_145322	ENST00000313367,ENST00000352860,ENST00000353930,ENST00000396429,ENST00000396431,ENST00000409069,ENST00000409452,ENST00000409555,ENST00000409759,ENST00000409863,ENST00000431825	OSBPL3.aAug10,OSBPL3.bAug10,OSBPL3.cAug10,OSBPL3.dAug10,OSBPL3.eAug10,OSBPL3.fAug10,OSBPL3.gAug10,OSBPL3.hAug10	uc003sxd.2,uc003sxe.2,uc003sxf.2,uc003sxg.2,uc003sxh.2,uc003sxi.2,uc003sxj.1,uc003sxk.1	1.34571	0.0466201
6:137527445:+,6:137528100:+	1.49001	1.82502	7.40865	1.70664e-09	6.95165e-08	11.4222	IFNGR1	core	NM_000416	ENST00000367735,ENST00000367739,ENST00000414770,ENST00000418947,ENST00000543628	IFNGR1.aAug10,IFNGR1.bAug10,IFNGR1.eAug10,IFNGR1.fAug10,IFNGR1.gAug10,IFNGR1.hAug10,IFNGR1.jAug10,IFNGR1.kAug10	uc003qho.2,uc011edm.1,uc011edn.1	1.39876	0.0912547
7:107878213:+,7:107880403:+	1.61664	1.10914	7.40818	1.70944e-09	6.95742e-08	11.3425	NRCAM	core	NM_001037132,NM_001193582,NM_001193583,NM_001193584	ENST00000379024,ENST00000379028,ENST00000418239,ENST00000425651,ENST00000442580	NRCAM.aAug10,NRCAM.bAug10,NRCAM.dAug10,NRCAM.eAug10,NRCAM.jAug10,NRCAM.sAug10	uc003vfb.2,uc003vfd.2,uc003vfe.2,uc011kmk.1	0.321861	1.29478
7:83640613:+,7:83643525:+	1.28366	1.26002	7.40711	1.71594e-09	6.98102e-08	11.5306	SEMA3A	core	NM_006080	ENST00000265362,ENST00000436949	SEMA3A.aAug10	uc003uhz.2	1.12314	0.160514
20:23370901:+,20:23375559:+	1.65954	1.49486	7.40476	1.73019e-09	7.03044e-08	11.3276	NAPB	core	NM_022080	ENST00000377026,ENST00000398425,ENST00000431864,ENST00000432543,ENST00000468128,ENST00000472855	NAPB.aAug10,NAPB.bAug10,NAPB.cAug10,NAPB.dAug10,NAPB.eAug10,NAPB.fAug10,NAPB.gAug10,NAPB.hAug10,NAPB.iAug10,NAPB.jAug10,NAPB.mAug10,NAPB.pAug10,NAPB.sAug10,NAPB.tAug10,NAPB.vaAug10	uc002wta.2,uc002wtb.2,uc002wtc.2,uc002wtd.3,uc010zss.1,uc010zst.1	1.24026	0.419286
7:24888795:+,7:24892123:+	1.48008	1.72793	7.39501	1.7906e-09	7.25828e-08	11.4503	OSBPL3	core	NM_015550,NM_145320	ENST00000313367,ENST00000352860,ENST00000396431,ENST00000409452,ENST00000409863	OSBPL3.aAug10,OSBPL3.bAug10,OSBPL3.eAug10,OSBPL3.fAug10	uc003sxd.2,uc003sxe.2,uc003sxf.2,uc003sxh.2	1.34571	0.134367
12:89744802:+,12:89745417:+	2.11029	1.07334	7.38706	1.84147e-09	7.44644e-08	10.7995	DUSP6	core	NM_001946	ENST00000279488	DUSP6.aAug10	uc001tay.2	1.84036	0.26993
5:161302648:+,5:161309564:+	2.12982	0.0288252	7.3767	1.9099e-09	7.67976e-08	10.7881	GABRA1	core	NM_000806,NM_001127643,NM_001127644,NM_001127645,NM_001127646,NM_001127647,NM_001127648	ENST00000023897,ENST00000393943,ENST00000420560,ENST00000428797,ENST00000437025,ENST00000444819,ENST00000519542	GABRA1.aAug10,GABRA1.bAug10,GABRA1.cAug10,GABRA1.dAug10,GABRA1.eAug10,GABRA1.fAug10,GABRA1.gAug10,GABRA1.iAug10	uc003lyx.3,uc010jiw.2,uc010jix.2,uc010jiy.2,uc010jiz.2,uc010jja.2,uc010jjb.2	1.9971	0.132713
5:145972625:+,5:145979854:+	1.49586	2.21925	7.3721	1.94114e-09	7.78205e-08	11.3084	PPP2R2B	core	NM_001127381,NM_004576,NM_181674,NM_181675,NM_181676,NM_181677,NM_181678	ENST00000336640,ENST00000356826,ENST00000394409,ENST00000394410,ENST00000394411,ENST00000394413,ENST00000394414,ENST00000453001,ENST00000504198,ENST00000508545,ENST00000512639,ENST00000512984,ENST00000530902	PPP2R2B.aAug10,PPP2R2B.bAug10,PPP2R2B.cAug10,PPP2R2B.dAug10,PPP2R2B.eAug10,PPP2R2B.fAug10,PPP2R2B.gAug10,PPP2R2B.hAug10,PPP2R2B.iAug10,PPP2R2B.jAug10,PPP2R2B.vfAug10	uc003loe.2,uc003lof.3,uc003log.3,uc003loh.3,uc003loi.3,uc003loj.3,uc003lok.3,uc010jgm.2,uc011dbu.1,uc011dbv.1	1.87928	-0.383421
13:111545610:+,13:111558380:+	1.47598	1.14523	7.37016	1.95446e-09	7.81191e-08	11.332	ANKRD10	core	NM_017664	ENST00000267339	ANKRD10.aAug10,ANKRD10.bAug10	uc001vrn.2	0.906273	0.569705
7:111372343:+,7:111375110:+	2.5506	0.244926	7.36874	1.96424e-09	7.83851e-08	10.1608	DOCK4	core	NM_014705	ENST00000352877,ENST00000428084,ENST00000437633,ENST00000445943,ENST00000486186,ENST00000494651	DOCK4.aAug10,DOCK4.bAug10,DOCK4.eAug10,DOCK4.hAug10	uc003vfv.2,uc003vfx.2,uc003vfy.2,uc011kml.1	1.92237	0.628226
5:130599859:+,5:130651669:+	2.43323	1.05971	7.36592	1.9839e-09	7.91064e-08	10.5411	CDC42SE2	core	NM_020240	ENST00000360515,ENST00000503291,ENST00000504701,ENST00000505065	CDC42SE2.aAug10,CDC42SE2.bAug10,CDC42SE2.cAug10,CDC42SE2.fAug10,CDC42SE2.lAug10,CDC42SE2.oAug10	uc003kvh.2,uc003kvi.2,uc003kvk.2	2.12738	0.305851
1:50661458:+,1:50663101:+	1.13539	2.76978	7.34442	2.14001e-09	8.45911e-08	11.3775	ELAVL4	core	NM_001144774,NM_001144775,NM_001144776,NM_001144777,NM_021952	ENST00000357083,ENST00000371819,ENST00000371821,ENST00000371823,ENST00000371824,ENST00000371827,ENST00000448907,ENST00000474675	ELAVL4.aAug10,ELAVL4.bAug10,ELAVL4.cAug10,ELAVL4.dAug10,ELAVL4.eAug10,ELAVL4.fAug10,ELAVL4.gAug10,ELAVL4.hAug10	uc001cry.3,uc001crz.3,uc001csa.3,uc001csb.2,uc001csc.3,uc009vyu.2,uc010omz.1	1.03175	0.103636
5:146017978:+,5:146030110:+	1.80016	1.73233	7.34353	2.14674e-09	8.47904e-08	10.974	PPP2R2B	core	NM_001127381,NM_004576,NM_181674,NM_181675,NM_181676,NM_181677,NM_181678	ENST00000336640,ENST00000356826,ENST00000394409,ENST00000394410,ENST00000394411,ENST00000394413,ENST00000394414,ENST00000453001,ENST00000504198,ENST00000508545,ENST00000512639,ENST00000530902	PPP2R2B.aAug10,PPP2R2B.bAug10,PPP2R2B.cAug10,PPP2R2B.dAug10,PPP2R2B.eAug10,PPP2R2B.fAug10,PPP2R2B.gAug10,PPP2R2B.hAug10,PPP2R2B.iAug10,PPP2R2B.jAug10	uc003loe.2,uc003lof.3,uc003log.3,uc003loh.3,uc003loi.3,uc003loj.3,uc003lok.3,uc010jgm.2,uc011dbu.1,uc011dbv.1	1.87928	-0.0791279
9:4722625:+,9:4740937:+	1.34089	1.6724	7.33967	2.17616e-09	8.5851e-08	11.2914	AK3	core	NM_016282	ENST00000381809	AK3.aAug10	uc003ziq.1	1.05395	0.286943
2:202265817:+,2:202272126:+	1.05758	2.47602	7.33928	2.17915e-09	8.5935e-08	11.3584	TRAK2	core	NM_015049	ENST00000332624,ENST00000430254,ENST00000542292	TRAK2andALS2CR12.aAug10,TRAK2andALS2CR12.fAug10	uc002uyb.3,uc002uyc.2	1.09976	-0.0421845
11:26547226:+,11:26552752:+	5.56218	-2.55775	7.31874	2.34279e-09	9.15168e-08	5.3732	ANO3	core	NM_031418	ENST00000256737,ENST00000525139,ENST00000531568,ENST00000537978	ANO3.aAug10,ANO3.cAug10	uc001mqt.3,uc010rdr.1,uc010rdt.1	5.45906	0.103126
1:50663139:+,1:50666523:+	1.17517	2.4701	7.31792	2.34958e-09	9.16822e-08	11.2777	ELAVL4	core	NM_001144774,NM_001144775,NM_001144776,NM_001144777	ENST00000357083,ENST00000371819,ENST00000371824,ENST00000371827,ENST00000448907	ELAVL4.aAug10,ELAVL4.bAug10,ELAVL4.dAug10,ELAVL4.eAug10,ELAVL4.fAug10,ELAVL4.gAug10	uc001cry.3,uc001crz.3,uc001csa.3,uc001csc.3,uc010omz.1	1.03175	0.143419
7:111381270:+,7:111381596:+	1.91484	0.714408	7.31219	2.3975e-09	9.34428e-08	10.7159	DOCK4	core	NM_014705	ENST00000342288,ENST00000352877,ENST00000423057,ENST00000428084,ENST00000437633,ENST00000445943,ENST00000494651	DOCK4.aAug10,DOCK4.bAug10,DOCK4.cAug10,DOCK4.eAug10,DOCK4.fAug10	uc003vfw.2,uc003vfx.2,uc003vfy.2,uc011kml.1,uc011kmm.1	1.92237	-0.00753869
1:50607530:+,1:50610629:+	1.69923	1.31313	7.30952	2.42021e-09	9.42546e-08	10.9254	ELAVL4	extended	None	ENST00000494555	ELAVL4.gAug10,ELAVL4.mAug10,ELAVL4.nAug10	None	1.03175	0.667475
6:166873039:+,6:166883329:+	1.62616	1.59861	7.30908	2.42392e-09	9.43606e-08	11.0139	RPS6KA2	core	NM_001006932,NM_021135	ENST00000265678,ENST00000405189,ENST00000481261,ENST00000503859,ENST00000510118	RNASET2andRPS6KA2.aAug10,RNASET2andRPS6KA2.bAug10,RNASET2andRPS6KA2.cAug10,RNASET2andRPS6KA2.dAug10,RNASET2andRPS6KA2.eAug10,RNASET2andRPS6KA2.oAug10	uc003qvb.1,uc003qvc.1,uc003qvd.1,uc010kkl.1,uc011ego.1	1.39312	0.233039
8:27098779:+,8:27099914:+	2.62416	0.922308	7.30898	2.42481e-09	9.43606e-08	9.83303	STMN4	extended	None	ENST00000265770,ENST00000519614,ENST00000519997	STMN4.bAug10,STMN4.eAug10,STMN4.fAug10,STMN4.hAug10	uc003xfk.2,uc010luo.2,uc011laj.1	2.3291	0.295054
1:32098915:+,1:32100823:+	1.24534	2.13864	7.30497	2.45933e-09	9.55185e-08	11.2009	PEF1	core	NM_012392,NR_033688	ENST00000373703,ENST00000461006,ENST00000472443,ENST00000489164,ENST00000492061,ENST00000496805	PEF1.aAug10,PEF1.bAug10,PEF1.cAug10,PEF1.dAug10,PEF1.eAug10,PEF1.kAug10	uc001btg.1,uc001bth.1	0.988879	0.256463
X:153138697:+,X:153141216:+	1.34123	1.2864	7.29578	2.54035e-09	9.83982e-08	11.1476	L1CAM	core	NM_000425,NM_024003	ENST00000361699,ENST00000370057,ENST00000370060,ENST00000439496,ENST00000458029,ENST00000460553,ENST00000464967	NAA10andARHGAP4andL1CAM.aAug10,NAA10andARHGAP4andL1CAM.bAug10,NAA10andARHGAP4andL1CAM.vlAug10,NAA10andARHGAP4andL1CAM.vvAug10	uc004fjb.2,uc004fjc.2	0.390735	0.950497
1:32096443:+,1:32098096:+	1.17994	2.39145	7.29146	2.57938e-09	9.97945e-08	11.1828	PEF1	core	NM_012392,NR_033686,NR_033688	ENST00000373703,ENST00000478502,ENST00000489164	PEF1.aAug10,PEF1.cAug10,PEF1.fAug10	uc001btf.1,uc001btg.1,uc001bth.1	0.988879	0.191064
X:19028896:+,X:19031804:+	1.85966	0.616085	7.28674	2.62268e-09	1.01274e-07	10.7209	GPR64	core	NM_001079858,NM_001079859,NM_001079860,NM_001184833,NM_001184834,NM_001184835,NM_001184836,NM_001184837,NM_005756	ENST00000340581,ENST00000354791,ENST00000356606,ENST00000357544,ENST00000357991,ENST00000360279,ENST00000379869,ENST00000379873,ENST00000379876,ENST00000379878,ENST00000397917	GPR64.aAug10,GPR64.bAug10,GPR64.cAug10,GPR64.dAug10,GPR64.eAug10,GPR64.fAug10,GPR64.gAug10,GPR64.hAug10,GPR64.iAug10,GPR64.jAug10,GPR64.kAug10	uc004cyw.2,uc004cyx.2,uc004cyy.2,uc004cyz.2,uc004cza.2,uc004czb.2,uc004czc.2,uc004czd.2,uc004cze.2,uc004czf.2,uc010nfj.2	1.29067	0.568992
4:119216216:+,4:119216933:+	1.14681	2.5317	7.27522	2.73141e-09	1.04787e-07	11.1368	PRSS12	core	NM_003619	ENST00000296498	PRSS12.aAug10	uc003ica.1	0.970894	0.175919
4:80828621:+,4:80898775:+	1.32918	2.07179	7.26475	2.83418e-09	1.08273e-07	11.0429	ANTXR2	core	NM_058172	ENST00000403729,ENST00000404191,ENST00000449651	ANTXR2.bAug10,ANTXR2.cAug10,ANTXR2.dAug10,ANTXR2.fAug10	uc003hlx.1,uc003hly.3	0.952904	0.376277
6:147655358:+,6:147674459:+	1.03519	2.3504	7.25519	2.93143e-09	1.11691e-07	11.074	STXBP5	core	NM_139244	ENST00000367479,ENST00000367481,ENST00000392291	STXBP5.bAug10	uc010khz.1	0.782663	0.252523
3:186761098:+,3:186769037:+	1.2224	2.23351	7.24729	3.01426e-09	1.14325e-07	11.0202	ST6GAL1	core	NM_003032,NM_173216	ENST00000169298,ENST00000448044,ENST00000448449,ENST00000464827	ST6GAL1.aAug10,ST6GAL1.bAug10,ST6GAL1.cAug10,ST6GAL1.dAug10,ST6GAL1.eAug10,ST6GAL1.fAug10	uc003frb.2,uc003frd.2	1.40289	-0.180483
11:26669403:+,11:26677672:+	5.33176	-2.33888	7.24671	3.02044e-09	1.14473e-07	5.1917	ANO3	core	NM_031418	ENST00000256737,ENST00000525139,ENST00000531568,ENST00000537978,ENST00000538001	ANO3.aAug10,ANO3.bAug10,ANO3.cAug10	uc001mqt.3,uc010rdr.1,uc010rds.1,uc010rdt.1	5.45906	-0.127291
4:80976372:+,4:80976514:+	1.03946	2.78311	7.24239	3.0668e-09	1.16055e-07	11.0304	ANTXR2	core	NM_001145794,NM_058172	ENST00000295465,ENST00000307333,ENST00000346652,ENST00000403729,ENST00000404191,ENST00000449651,ENST00000514959	ANTXR2.aAug10,ANTXR2.bAug10,ANTXR2.cAug10,ANTXR2.dAug10,ANTXR2.eAug10,ANTXR2.fAug10,ANTXR2.gAug10	uc003hlx.1,uc003hly.3,uc003hlz.3,uc010ijn.2	0.952904	0.0865579
7:75513166:+,7:75517310:+	1.0355	2.60669	7.23957	3.09753e-09	1.17129e-07	11.0208	RHBDD2	core	NM_001040456,NM_001040457	ENST00000006777,ENST00000318622,ENST00000413229,ENST00000428119,ENST00000454791,ENST00000467406,ENST00000470957	RHBDD2.aAug10,RHBDD2.bAug10,RHBDD2.gAug10	uc003udv.1,uc003udw.1	1.30825	-0.272747
18:32682123:+,18:32706912:+	1.03917	2.63519	7.23563	3.1409e-09	1.18635e-07	11.0074	MAPRE2	core	NM_001143826,NM_001143827,NM_001256420,NM_014268,NR_026570,NR_046177	ENST00000300249,ENST00000413393,ENST00000436190,ENST00000538170	MAPRE2.aAug10,MAPRE2.bAug10,MAPRE2.cAug10,MAPRE2.dAug10,MAPRE2.eAug10,MAPRE2.fAug10,MAPRE2.gAug10	uc002kyf.2,uc002kyg.2,uc002kyh.2,uc010xcb.1,uc010xcc.1,uc010xcd.1	1.03966	-0.000497503
4:119665313:+,4:119666099:+	1.01076	2.65496	7.23105	3.1921e-09	1.20342e-07	10.9907	SEC24D	core	NM_014822	ENST00000280551,ENST00000379735,ENST00000419654,ENST00000429811,ENST00000505134,ENST00000511033,ENST00000511481,ENST00000514561	SEC24D.aAug10,SEC24D.bAug10,SEC24D.cAug10,SEC24D.dAug10,SEC24D.eAug10,SEC24D.fAug10,SEC24D.pAug10	uc003ich.3,uc003ici.3,uc003icj.3,uc003icl.2	1.08439	-0.0736265
2:149840280:+,2:149847524:+	1.01683	3.1148	7.22721	3.23556e-09	1.21615e-07	10.9759	KIF5C	core	NM_004522	ENST00000334436,ENST00000397413,ENST00000414838,ENST00000435030,ENST00000460377,ENST00000464066	KIF5C.aAug10,KIF5C.bAug10,KIF5C.cAug10	uc002tws.1,uc002twt.2,uc010zbu.1	1.0984	-0.0815767
7:111395657:+,7:111398680:+	2.14309	0.520695	7.22198	3.29586e-09	1.23649e-07	10.149	DOCK4	core	NM_014705	ENST00000342288,ENST00000352877,ENST00000423057,ENST00000428084,ENST00000437633,ENST00000445943,ENST00000494651	DOCK4.aAug10,DOCK4.bAug10,DOCK4.cAug10,DOCK4.eAug10,DOCK4.fAug10	uc003vfw.2,uc003vfx.2,uc003vfy.2,uc011kml.1,uc011kmm.1	1.92237	0.220721
2:197021375:+,2:197027986:+	1.11884	2.07938	7.21944	3.3256e-09	1.24718e-07	10.9451	STK17B	core	NM_004226	ENST00000263955,ENST00000409228,ENST00000420683	STK17B.aAug10,STK17B.bAug10,STK17B.dAug10	uc002utk.2,uc010fsh.2	1.15512	-0.0362806
6:137519776:+,6:137522018:+	1.29569	2.12791	7.21898	3.33091e-09	1.24824e-07	10.8957	IFNGR1	core	NM_000416	ENST00000367739,ENST00000418947,ENST00000543628	IFNGR1.aAug10,IFNGR1.bAug10,IFNGR1.cAug10,IFNGR1.dAug10	uc003qho.2,uc011edm.1	1.39876	-0.10307
2:220396850:+,2:220397037:+	1.87946	1.20415	7.21541	3.37316e-09	1.26218e-07	10.4308	ACCN4	core	NM_018674,NM_182847	ENST00000347842,ENST00000358078,ENST00000473709,ENST00000474489	ACCN4.aAug10,ACCN4.bAug10,ACCN4.cAug10,ACCN4.eAug10,ACCN4.fAug10,ACCN4.gAug10	uc002vlz.2,uc002vma.2,uc002vmb.2,uc010fwi.1,uc010fwj.1	1.73459	0.144872
2:232135785:+,2:232137668:+	1.14445	2.12099	7.20527	3.49611e-09	1.30139e-07	10.8929	ARMC9	core	NM_025139	ENST00000349938,ENST00000359743,ENST00000424740,ENST00000428662,ENST00000436339,ENST00000446447,ENST00000481520,ENST00000483477	ARMC9.aAug10,ARMC9.bAug10,ARMC9.cAug10,ARMC9.gAug10,ARMC9.hAug10,ARMC9.iAug10	uc002vrp.3,uc002vrq.3,uc002vrr.1	0.862195	0.282253
7:111409733:+,7:111418332:+	2.24488	0.331969	7.19023	3.68676e-09	1.36526e-07	9.92845	DOCK4	core	NM_014705	ENST00000342288,ENST00000352877,ENST00000417165,ENST00000423057,ENST00000428053,ENST00000428084,ENST00000437129,ENST00000437633,ENST00000445943,ENST00000450156,ENST00000492436,ENST00000494651	DOCK4.aAug10,DOCK4.bAug10,DOCK4.cAug10,DOCK4.eAug10,DOCK4.fAug10,DOCK4.jAug10,DOCK4.kAug10,DOCK4.lAug10	uc003vfw.2,uc003vfx.2,uc003vfy.2,uc011kml.1,uc011kmm.1	1.92237	0.322502
12:57483137:+,12:57484908:+	2.09569	0.963714	7.18602	3.74198e-09	1.3852e-07	10.116	NAB2	core	NM_005967	ENST00000300131,ENST00000342556,ENST00000357680	NAB2.aAug10	uc001smz.2	2.20419	-0.108507
1:151687152:+,1:151688352:+	1.48935	1.55054	7.18549	3.74895e-09	1.38726e-07	10.7091	CELF3	core	NM_001172649,NM_007185	ENST00000290583,ENST00000290585,ENST00000368833,ENST00000420342,ENST00000479893	CELF3.aAug10,CELF3.bAug10,CELF3.cAug10,CELF3.dAug10,CELF3.fAug10	uc001eyr.2,uc001eys.1,uc001eyt.2,uc009wmx.1,uc009wmy.2,uc010pdi.1	2.01186	-0.522514
17:40497675:+,17:40498587:+	1.07406	2.81243	7.18351	3.77532e-09	1.39599e-07	10.8297	STAT3	core	NM_003150,NM_139276,NM_213662	ENST00000264657,ENST00000389272,ENST00000404395	STAT3.aAug10,STAT3.bAug10,STAT3.cAug10,STAT3.dAug10,STAT3.eAug10,STAT3.fAug10,STAT3.hAug10,STAT3.jAug10	uc002hzk.1,uc002hzl.1,uc002hzm.1,uc002hzn.1,uc010wgh.1	0.789201	0.284862
7:111379299:+,7:111379452:+	2.2361	0.45471	7.17925	3.83254e-09	1.4135e-07	9.9901	DOCK4	core	NM_014705	ENST00000342288,ENST00000352877,ENST00000423057,ENST00000428084,ENST00000437633,ENST00000445943,ENST00000494651	DOCK4.aAug10,DOCK4.bAug10,DOCK4.cAug10,DOCK4.eAug10,DOCK4.fAug10	uc003vfw.2,uc003vfx.2,uc003vfy.2,uc011kml.1,uc011kmm.1	1.92237	0.313729
16:65026937:+,16:65032465:+	1.49387	1.56619	7.17741	3.85751e-09	1.42114e-07	10.6881	CDH11	core	NM_001797	ENST00000268603,ENST00000394156,ENST00000538390	CDH11.aAug10,CDH11.bAug10,CDH11.dAug10	uc002eoi.2,uc002eoj.2,uc010cdn.2,uc010vin.1	1.22347	0.270402
22:25855482:+,22:25856834:+	1.16995	2.34083	7.16435	4.03952e-09	1.47733e-07	10.7624	CRYBB2P1	core	NR_033733,NR_033734	ENST00000382734	CRYBB2P1andADRBK2.jAug10,CRYBB2P1andADRBK2.veAug10	uc003abt.2,uc003abu.2	1.0795	0.0904452
7:111508210:+,7:111509630:+	2.59392	0.159199	7.1558	4.16346e-09	1.51658e-07	9.42724	DOCK4	core	NM_014705	ENST00000342288,ENST00000352877,ENST00000423057,ENST00000428084,ENST00000437633,ENST00000445943,ENST00000476846,ENST00000544250	DOCK4.aAug10,DOCK4.bAug10,DOCK4.cAug10,DOCK4.dAug10	uc003vfw.2,uc003vfx.2,uc003vfy.2,uc003vga.1	1.92237	0.671542
X:19027900:+,X:19028731:+	1.91555	0.53499	7.15304	4.20412e-09	1.52916e-07	10.2256	GPR64	core	NM_001079858,NM_001079859,NM_001079860,NM_001184833,NM_001184834,NM_001184835,NM_001184836,NM_001184837,NM_005756	ENST00000340581,ENST00000354791,ENST00000356606,ENST00000357544,ENST00000357991,ENST00000360279,ENST00000379869,ENST00000379873,ENST00000379876,ENST00000379878,ENST00000397917	GPR64.aAug10,GPR64.bAug10,GPR64.cAug10,GPR64.dAug10,GPR64.eAug10,GPR64.fAug10,GPR64.gAug10,GPR64.hAug10,GPR64.iAug10,GPR64.jAug10,GPR64.kAug10	uc004cyw.2,uc004cyx.2,uc004cyy.2,uc004cyz.2,uc004cza.2,uc004czb.2,uc004czc.2,uc004czd.2,uc004cze.2,uc004czf.2,uc010nfj.2	1.29067	0.624882
11:26656617:+,11:26660691:+	5.46762	-2.32325	7.15056	4.24112e-09	1.53983e-07	5.06265	ANO3	core	NM_031418	ENST00000256737,ENST00000525139,ENST00000531568,ENST00000537978,ENST00000538001	ANO3.aAug10,ANO3.bAug10,ANO3.cAug10,ANO3.dAug10	uc001mqt.3,uc010rdr.1,uc010rds.1,uc010rdt.1	5.45906	0.0085605
19:41837115:+,19:41838033:+	1.67072	1.40386	7.14649	4.30257e-09	1.55932e-07	10.3959	TGFB1	core	NM_000660	ENST00000221930	TGFB1.aAug10,TGFB1.bAug10,TGFB1.dAug10	uc002oqh.1	1.66166	0.0090637
6:126136550:+,6:126176166:+	1.00281	2.7607	7.14415	4.33823e-09	1.5711e-07	10.6889	NCOA7	core	NM_001122842,NM_001199619,NM_001199620,NM_181782	ENST00000368357,ENST00000392477,ENST00000417494,ENST00000419660,ENST00000428318,ENST00000431092,ENST00000453302,ENST00000487635	NCOA7.aAug10,NCOA7.bAug10,NCOA7.cAug10,NCOA7.dAug10,NCOA7.eAug10,NCOA7.gAug10,NCOA7.hAug10,NCOA7.mAug10,NCOA7.nAug10,NCOA7.rAug10,NCOA7.sAug10	uc003qae.3,uc003qaf.2,uc003qag.2,uc003qah.2,uc003qai.2,uc003qaj.2,uc010kes.2	0.748426	0.254386
X:102933528:+,X:102939609:+	1.03951	2.49637	7.14264	4.36145e-09	1.57837e-07	10.6911	MORF4L2	core	NM_001142424,NM_001142428	ENST00000372619,ENST00000418819	MORF4L2.kAug10,MORF4L2.mAug10,MORF4L2.vhAug10	uc004ekw.2,uc004ekz.2,uc011msb.1	0.223718	0.815792
9:34989828:+,9:34993197:+	1.56574	1.27402	7.14106	4.38595e-09	1.58609e-07	10.4696	DNAJB5	core	NM_012266	ENST00000312316,ENST00000469798,ENST00000538278	DNAJB5.dAug10,DNAJB5.gAug10	uc003zvt.2	1.18277	0.382972
2:149806457:+,2:149806828:+	1.08138	2.87709	7.13716	4.44664e-09	1.60688e-07	10.6724	KIF5C	core	NM_004522	ENST00000334436,ENST00000397413,ENST00000414838,ENST00000435030,ENST00000450621,ENST00000464066	KIF5C.aAug10,KIF5C.bAug10,KIF5C.cAug10,KIF5C.gAug10,KIF5C.kAug10	uc002tws.1,uc010zbu.1	1.0984	-0.0170206
5:161318056:+,5:161322672:+	2.055	-0.111245	7.13515	4.47846e-09	1.61605e-07	9.98321	GABRA1	core	NM_000806,NM_001127643,NM_001127644,NM_001127645,NM_001127646,NM_001127647,NM_001127648	ENST00000023897,ENST00000393943,ENST00000420560,ENST00000428797,ENST00000437025,ENST00000444819	GABRA1.aAug10,GABRA1.bAug10,GABRA1.cAug10,GABRA1.dAug10,GABRA1.eAug10,GABRA1.fAug10,GABRA1.gAug10	uc003lyx.3,uc010jiw.2,uc010jix.2,uc010jiy.2,uc010jiz.2,uc010jja.2,uc010jjb.2	1.9971	0.0578922
10:104167023:+,10:104168652:+	1.33112	1.38512	7.13399	4.49677e-09	1.62032e-07	10.597	PSD	extended	None	ENST00000461698	PSD.dAug10,PSD.lAug10	uc001kvf.1	1.31041	0.0207152
21:22664561:+,21:22696703:+	1.03312	2.63392	7.12903	4.57621e-09	1.6454e-07	10.6437	NCAM2	core	NM_004540	ENST00000284894,ENST00000400546,ENST00000461281,ENST00000535285	NCAM2.aAug10,NCAM2.bAug10,NCAM2.cAug10,NCAM2.eAug10,NCAM2.fAug10	uc002yld.1,uc011acb.1,uc011acc.1	0.850367	0.182752
11:26538474:+,11:26547182:+	5.28936	-2.13394	7.12324	4.67079e-09	1.6758e-07	5.05944	ANO3	core	NM_031418	ENST00000256737,ENST00000525139,ENST00000531568,ENST00000537978	ANO3.aAug10,ANO3.cAug10	uc001mqt.3,uc010rdr.1,uc010rdt.1	5.45906	-0.169695
7:24901388:+,7:24902819:+	1.49599	1.55786	7.11964	4.73057e-09	1.69482e-07	10.468	OSBPL3	core	NM_015550,NM_145321	ENST00000313367,ENST00000353930,ENST00000396429,ENST00000409452,ENST00000409759	OSBPL3.aAug10,OSBPL3.cAug10,OSBPL3.eAug10,OSBPL3.gAug10	uc003sxd.2,uc003sxf.2,uc003sxg.2,uc003sxj.1	1.34571	0.150281
1:153517285:+,1:153518229:+	1.38828	1.78603	7.10929	4.90684e-09	1.75234e-07	10.5026	S100A4	core	NM_002961	ENST00000368716,ENST00000468373,ENST00000545360	S100A3andS100A4.lAug10,S100A3andS100A4.oAug10	uc001fbz.2	1.30855	0.0797215
8:27101318:+,8:27115868:+	2.45885	1.07175	7.10373	5.0041e-09	1.78389e-07	9.36426	STMN4	core	NM_030795	ENST00000265770,ENST00000350889,ENST00000519614,ENST00000522750,ENST00000522908,ENST00000523048	STMN4.aAug10,STMN4.bAug10,STMN4.cAug10,STMN4.dAug10,STMN4.eAug10,STMN4.gAug10,STMN4.hAug10,STMN4.jAug10,STMN4.kAug10	uc003xfj.2,uc003xfk.2,uc010luo.2,uc011lai.1,uc011lak.1	2.3291	0.12975
7:111430661:+,7:111448877:+	2.08816	0.520017	7.10344	5.00932e-09	1.78512e-07	9.8824	DOCK4	core	NM_014705	ENST00000342288,ENST00000352877,ENST00000423057,ENST00000428084,ENST00000437633,ENST00000445943,ENST00000469898,ENST00000544250	DOCK4.aAug10,DOCK4.bAug10,DOCK4.cAug10	uc003vfw.2,uc003vfx.2,uc003vfy.2	1.92237	0.165785
10:104165010:+,10:104165103:+	1.07482	2.13257	7.09119	5.23088e-09	1.85353e-07	10.5161	PSD	core	NM_002779	ENST00000020673,ENST00000406432,ENST00000473507,ENST00000479172,ENST00000541902	PSD.aAug10,PSD.bAug10,PSD.cAug10,PSD.dAug10,PSD.fAug10,PSD.gAug10,PSD.hAug10,PSD.iAug10,PSD.kAug10,PSD.lAug10,PSD.mAug10	uc001kve.1,uc001kvf.1,uc001kvg.1,uc001kvh.1,uc009xxd.1	1.31041	-0.235584
7:24846521:+,7:24849426:+	1.32239	2.01906	7.09081	5.23787e-09	1.85535e-07	10.4822	OSBPL3	core	NM_015550,NM_145320,NM_145321,NM_145322	ENST00000313367,ENST00000352860,ENST00000353930,ENST00000396429,ENST00000396431,ENST00000409069,ENST00000409452,ENST00000409555,ENST00000409759,ENST00000409863,ENST00000431825,ENST00000459987	OSBPL3.aAug10,OSBPL3.bAug10,OSBPL3.cAug10,OSBPL3.dAug10,OSBPL3.eAug10,OSBPL3.fAug10,OSBPL3.mAug10	uc003sxd.2,uc003sxe.2,uc003sxf.2,uc003sxg.2,uc003sxh.2,uc003sxi.2	1.34571	-0.0233274
5:24509928:+,5:24511436:+	1.80654	0.706976	7.08416	5.36237e-09	1.89366e-07	10.0804	CDH10	core	NM_006727	ENST00000264463,ENST00000510477	CDH10.aAug10,CDH10.bAug10	uc003jgr.1,uc011cnu.1	1.50966	0.296882
19:13211562:+,19:13211651:+	1.53637	1.41599	7.08317	5.38128e-09	1.89744e-07	10.2976	LYL1	core	NM_005583	ENST00000264824	LYL1.aAug10,LYL1.bAug10,LYL1.cAug10	uc002mwi.2	1.17442	0.36195
16:424151:+,16:424221:+	1.63098	1.10902	7.0808	5.4264e-09	1.912e-07	10.1983	TMEM8A	core	NM_021259	ENST00000250930,ENST00000382942,ENST00000424078,ENST00000431232,ENST00000448854,ENST00000467452	TMEM8A.aAug10,TMEM8A.bAug10,TMEM8A.cAug10,TMEM8A.dAug10,TMEM8A.eAug10,TMEM8A.fAug10	uc002cgu.3,uc002cgv.3	1.50184	0.129143
9:4718537:+,9:4719135:+	1.05838	2.36403	7.07773	5.48574e-09	1.93223e-07	10.4699	AK3	core	NM_001199852,NM_001199853,NM_001199855,NM_001199856,NM_016282	ENST00000359883,ENST00000381809,ENST00000447596,ENST00000474822	AK3.aAug10,AK3.bAug10,AK3.cAug10,AK3.dAug10,AK3.eAug10	uc003zip.1,uc003ziq.1,uc003zir.1,uc011lma.1	1.05395	0.00443536
6:30647166:+,6:30652185:+	1.05667	2.29613	7.06279	5.78322e-09	2.02421e-07	10.419	KIAA1949	core	NM_001134870,NM_133471	ENST00000274853,ENST00000399199,ENST00000488324	KIAA1949.aAug10,KIAA1949.bAug10,KIAA1949.dAug10	uc003nra.2,uc003nrb.3	1.01172	0.0449447
8:42040408:+,8:42042599:+	1.00715	2.56798	7.04015	6.26494e-09	2.17535e-07	10.3426	PLAT	core	NM_000930,NM_033011	ENST00000220809,ENST00000270189,ENST00000352041,ENST00000429089,ENST00000519510,ENST00000524261	PLAT.aAug10,PLAT.bAug10	uc003xos.2,uc003xot.2,uc010lxf.1	0.747255	0.259892
10:112262627:+,10:112266693:+	2.565	0.664323	7.03645	6.34734e-09	2.20091e-07	9.00967	DUSP5	core	NM_004419	ENST00000369583,ENST00000476681	DUSP5.aAug10	uc001kzd.2	2.72669	-0.161696
11:26621261:+,11:26646009:+	5.22223	-2.1551	7.03585	6.36091e-09	2.20485e-07	4.89322	ANO3	core	NM_031418	ENST00000256737,ENST00000525139,ENST00000531568,ENST00000537978,ENST00000538001	ANO3.aAug10,ANO3.bAug10,ANO3.cAug10	uc001mqt.3,uc010rdr.1,uc010rds.1,uc010rdt.1	5.45906	-0.236824
5:140885048:+,5:140890514:+	1.23058	2.11098	7.03177	6.45322e-09	2.23299e-07	10.2823	PCDHGA1,PCDHGA10,PCDHGA11,PCDHGA12,PCDHGA2,PCDHGA3,PCDHGA4,PCDHGA5,PCDHGA6,PCDHGA7,PCDHGA8,PCDHGA9,PCDHGB1,PCDHGB2,PCDHGB3,PCDHGB4,PCDHGB5,PCDHGB6,PCDHGB7,PCDHGC3,PCDHGC4,PCDHGC5	core	NM_002588,NM_003735,NM_003736,NM_018912,NM_018913,NM_018914,NM_018915,NM_018916,NM_018917,NM_018918,NM_018919,NM_018920,NM_018921,NM_018922,NM_018923,NM_018924,NM_018925,NM_018926,NM_018927,NM_018928,NM_018929,NM_032088,NM_032092,NM_032403	ENST00000252085,ENST00000252087,ENST00000253812,ENST00000306593,ENST00000308177,ENST00000394576,ENST00000398587,ENST00000398594,ENST00000398604,ENST00000398610,ENST00000517417,ENST00000517434,ENST00000518069,ENST00000518325,ENST00000518882,ENST00000519479,ENST00000520790,ENST00000522605,ENST00000523390	PCDHG_.aAug10,PCDHG_.bAug10,PCDHG_.cAug10,PCDHG_.dAug10,PCDHG_.eAug10,PCDHG_.fAug10,PCDHG_.gAug10,PCDHG_.hAug10,PCDHG_.iAug10,PCDHG_.jAug10,PCDHG_.kAug10,PCDHG_.lAug10,PCDHG_.mAug10,PCDHG_.nAug10,PCDHG_.oAug10,PCDHG_.pAug10,PCDHG_.qAug10,PCDHG_.rAug10,PCDHG_.sAug10,PCDHG_.tAug10,PCDHG_.uAug10,PCDHG_.vaAug10,PCDHG_.vwAug10,PCDHG_.vxAug10,PCDHG_.waAug10,PCDHG_.wbAug10,PCDHG_.wcAug10	uc003lji.1,uc003ljk.1,uc003ljm.1,uc003ljo.1,uc003ljq.1,uc003ljs.1,uc003lju.1,uc003ljw.1,uc003ljy.1,uc003lka.1,uc003lkc.1,uc003lkd.1,uc003lkf.1,uc003lkh.1,uc003lkj.1,uc003lkl.1,uc003lkn.1,uc003lkp.1,uc003lkq.1,uc003lkt.1,uc003lkv.1,uc003lkw.1,uc003lky.1,uc003lla.1,uc010jfx.1	1.07152	0.159058
4:95494544:+,4:95497094:+	2.39374	0.514418	7.03127	6.46482e-09	2.23612e-07	9.24754	PDLIM5	core	NM_001011513,NM_001011515,NM_001256426,NM_001256427	ENST00000380180,ENST00000437932,ENST00000450793,ENST00000503974,ENST00000508216,ENST00000508531,ENST00000513341,ENST00000514743,ENST00000514830	PDLIM5.aAug10,PDLIM5.dAug10,PDLIM5.eAug10,PDLIM5.jAug10,PDLIM5.oAug10,PDLIM5.pAug10,PDLIM5.rAug10,PDLIM5.vdAug10	uc003htg.2,uc003hth.2,uc003htk.2,uc011cdx.1	1.06138	1.33235
7:111387499:+,7:111395571:+	1.86804	0.692042	7.03033	6.48619e-09	2.2413e-07	9.85469	DOCK4	core	NM_014705	ENST00000342288,ENST00000352877,ENST00000423057,ENST00000428084,ENST00000437633,ENST00000445943,ENST00000494651	DOCK4.aAug10,DOCK4.bAug10,DOCK4.cAug10,DOCK4.eAug10,DOCK4.fAug10	uc003vfw.2,uc003vfx.2,uc003vfy.2,uc011kml.1,uc011kmm.1	1.92237	-0.0543331
2:197008410:+,2:197010635:+	1.14031	1.94846	7.01188	6.92336e-09	2.37431e-07	10.2354	STK17B	core	NM_004226	ENST00000263955,ENST00000409228	STK17B.aAug10,STK17B.bAug10	uc002utk.2,uc010fsh.2	1.15512	-0.0148105
7:24844056:+,7:24846395:+	1.17315	2.21857	7.00899	6.99461e-09	2.39388e-07	10.2333	OSBPL3	core	NM_015550,NM_145320,NM_145321,NM_145322	ENST00000313367,ENST00000352860,ENST00000353930,ENST00000396429,ENST00000396431,ENST00000409069,ENST00000409452,ENST00000409555,ENST00000409759,ENST00000409863,ENST00000431825	OSBPL3.aAug10,OSBPL3.bAug10,OSBPL3.cAug10,OSBPL3.dAug10,OSBPL3.eAug10,OSBPL3.fAug10	uc003sxd.2,uc003sxe.2,uc003sxf.2,uc003sxg.2,uc003sxh.2,uc003sxi.2	1.34571	-0.172564
7:111541857:+,7:111555834:+	1.95773	0.685032	6.99407	7.37354e-09	2.51242e-07	9.61171	DOCK4	core	NM_014705	ENST00000342288,ENST00000352877,ENST00000428084,ENST00000437633,ENST00000445943,ENST00000476846,ENST00000544250	DOCK4.aAug10,DOCK4.bAug10,DOCK4.dAug10	uc003vfx.2,uc003vfy.2,uc003vga.1	1.92237	0.035356
4:95507595:+,4:95539155:+	1.0286	2.66397	6.98726	7.5532e-09	2.56578e-07	10.1625	PDLIM5	core	NM_001011513,NM_001256425,NM_001256427,NM_001256428,NM_006457,NR_024179	ENST00000317968,ENST00000380176,ENST00000437932,ENST00000503974,ENST00000506632,ENST00000509357,ENST00000511586,ENST00000542407	PDLIM5.bAug10,PDLIM5.cAug10,PDLIM5.dAug10,PDLIM5.eAug10,PDLIM5.fAug10,PDLIM5.gAug10,PDLIM5.hAug10,PDLIM5.nAug10,PDLIM5.viAug10	uc003hth.2,uc003hti.2,uc003htj.2,uc003htl.2,uc011cdx.1,uc011cdy.1	1.06138	-0.0327814
6:134492053:+,6:134492161:+	1.14995	2.54631	6.98368	7.64952e-09	2.59328e-07	10.1363	SGK1	core	NM_001143676,NM_001143677,NM_001143678,NM_005627	ENST00000237305,ENST00000367857,ENST00000367858,ENST00000413996,ENST00000475719,ENST00000477460,ENST00000528577	SGK1.aAug10,SGK1.bAug10,SGK1.cAug10,SGK1.dAug10,SGK1.eAug10,SGK1.fAug10,SGK1.lAug10	uc003qen.3,uc003qeo.3,uc011ect.1,uc011ecu.1,uc011ecv.1,uc011ecw.1	1.11953	0.0304188
12:71526604:+,12:71531733:+	1.12077	2.00949	6.97731	7.82357e-09	2.63885e-07	10.1289	TSPAN8	core	NM_004616	ENST00000247829,ENST00000393330,ENST00000546561,ENST00000552128	TSPAN8.aAug10,TSPAN8.bAug10,TSPAN8.cAug10,TSPAN8.dAug10,TSPAN8.eAug10,TSPAN8.fAug10	uc001swj.1,uc001swk.1,uc009zrt.1	0.946266	0.174499
19:41838186:+,19:41847788:+	1.44555	1.73219	6.97384	7.92025e-09	2.66401e-07	9.9919	TGFB1	core	NM_000660	ENST00000221930	TGFB1.aAug10,TGFB1.bAug10,TGFB1.cAug10,TGFB1.dAug10	uc002oqh.1	1.66166	-0.216111
12:39118701:+,12:39124085:+	1.03158	2.39416	6.97069	8.00891e-09	2.6905e-07	10.1064	CPNE8	core	NM_153634	ENST00000331366,ENST00000360449	CPNE8.aAug10,CPNE8.bAug10	uc001rls.1	0.918754	0.112822
13:36046242:+,13:36046537:+	1.6022	0.979182	6.95867	8.35691e-09	2.79243e-07	9.90247	NBEA	extended	None	None	NBEA.mAug10	None	0.799454	0.802747
6:47252168:+,6:47253680:+	1.2085	2.4659	6.95757	8.38943e-09	2.80237e-07	10.0502	TNFRSF21	core	NM_014452	ENST00000296861	TNFRSF21.aAug10	uc003oyv.2	1.45888	-0.250382
3:112064135:+,3:112066405:+	1.41764	1.32103	6.95168	8.56597e-09	2.85373e-07	9.92733	CD200	core	NM_001004196,NM_005944	ENST00000315711,ENST00000383681,ENST00000473539	CD200.aAug10,CD200.bAug10,CD200.cAug10,CD200.dAug10,CD200.eAug10,CD200.fAug10	uc003dyw.2,uc003dyx.2,uc003dyz.2	1.16118	0.256461
11:67234859:+,11:67234972:+	1.68467	1.1268	6.95123	8.57957e-09	2.85731e-07	9.73963	TMEM134	core	NM_001078650,NM_001078651,NM_025124	ENST00000308022,ENST00000393877,ENST00000452789,ENST00000501408,ENST00000535585,ENST00000535813,ENST00000536020,ENST00000537601,ENST00000540133,ENST00000541059,ENST00000545682	TMEM134.bAug10,TMEM134.cAug10,TMEM134.dAug10,TMEM134.eAug10,TMEM134.fAug10,TMEM134.gAug10,TMEM134.hAug10,TMEM134.iAug10,TMEM134.kAug10,TMEM134.lAug10,TMEM134.mAug10,TMEM134.nAug10,TMEM134.oAug10,TMEM134.qAug10,TMEM134.rAug10,TMEM134.tAug10,TMEM134.uAug10,TMEM134.vaAug10,TMEM134.vbAug10,TMEM134.vcAug10,TMEM134.vdAug10,TMEM134.veAug10,TMEM134.vfAug10	uc001olp.1,uc001olq.1,uc001olr.1,uc001ols.1,uc001olt.1,uc001olu.3,uc009yrx.2,uc010rpt.1,uc010rpu.1	1.85887	-0.174197
17:79977257:+,17:79977517:+	1.36353	1.33827	6.93909	8.95607e-09	2.96718e-07	9.91599	STRA13	extended	None	ENST00000392359	STRA13.eAug10,STRA13.fAug10,STRA13.gAug10,STRA13.lAug10,STRA13.mAug10	None	-0.0416531	1.40518
1:99753706:+,1:99762294:+	1.2159	1.73132	6.93726	9.01433e-09	2.98327e-07	9.96016	LPPR4	core	NM_001166252,NM_014839	ENST00000263178,ENST00000370185,ENST00000457765	LPPR4.aAug10,LPPR4.bAug10	uc001dse.2,uc010oue.1	1.32678	-0.110885
6:134495724:+,6:134495870:+	1.01128	2.91043	6.93324	9.14348e-09	3.02501e-07	9.97753	SGK1	core	NM_005627	ENST00000237305,ENST00000367855,ENST00000474427,ENST00000475719,ENST00000530421,ENST00000532856,ENST00000534658	SGK1.dAug10,SGK1.fAug10,SGK1.gAug10,SGK1.kAug10,SGK1.nAug10,SGK1.rAug10,SGK1.vaAug10,SGK1.vfAug10	uc003qen.3,uc011ecu.1	1.11953	-0.108253
2:149868197:+,2:149879592:+	1.08881	2.70959	6.92475	9.42223e-09	3.10698e-07	9.94976	KIF5C	core	NM_004522	ENST00000334436,ENST00000397413,ENST00000414838,ENST00000435030,ENST00000482151	KIF5C.aAug10,KIF5C.dAug10	uc002twu.1,uc010zbu.1	1.0984	-0.00959013
5:161281276:+,5:161292727:+	2.09342	-0.00293587	6.92157	9.52883e-09	3.13491e-07	9.22122	GABRA1	core	NM_000806,NM_001127643,NM_001127644,NM_001127645,NM_001127646,NM_001127647,NM_001127648	ENST00000023897,ENST00000393943,ENST00000420560,ENST00000428797,ENST00000437025,ENST00000444819,ENST00000519621,ENST00000521339,ENST00000522651	GABRA1.aAug10,GABRA1.bAug10,GABRA1.cAug10,GABRA1.dAug10,GABRA1.eAug10,GABRA1.fAug10,GABRA1.gAug10,GABRA1.hAug10	uc003lyx.3,uc010jiw.2,uc010jix.2,uc010jiy.2,uc010jiz.2,uc010jja.2,uc010jjb.2	1.9971	0.0963202
16:1816972:+,16:1817150:+	1.40461	1.77137	6.91875	9.62417e-09	3.16316e-07	9.81785	MAPK8IP3	core	NM_001040439,NM_015133	ENST00000250894,ENST00000356010	MAPK8IP3.aAug10,MAPK8IP3.bAug10,MAPK8IP3.cAug10,MAPK8IP3.jAug10	uc002cmk.2,uc002cml.2,uc010uvl.1	1.14252	0.262093
18:907791:+,18:908266:+	2.10978	0.128166	6.90229	1.02014e-08	3.32346e-07	9.11298	ADCYAP1	core	NM_001099733,NM_001117	ENST00000269200,ENST00000400219,ENST00000450565	ADCYAP1.aAug10,ADCYAP1.bAug10,ADCYAP1.cAug10	uc010dkg.2,uc010dkh.2	2.38766	-0.27788
7:24932240:+,7:25019505:+	1.52733	1.31935	6.90046	1.02677e-08	3.34193e-07	9.69691	OSBPL3	core	NM_015550,NM_145320,NM_145321,NM_145322	ENST00000313367,ENST00000352860,ENST00000353930,ENST00000431825	OSBPL3.aAug10,OSBPL3.bAug10,OSBPL3.cAug10,OSBPL3.dAug10,OSBPL3.jAug10,OSBPL3.kAug10	uc003sxf.2,uc003sxg.2,uc003sxh.2,uc003sxi.2	1.34571	0.181618
2:220396624:+,2:220396723:+	1.62862	1.34699	6.89954	1.0301e-08	3.35157e-07	9.58639	ACCN4	core	NM_018674,NM_182847	ENST00000347842,ENST00000358078,ENST00000461395,ENST00000473709,ENST00000474489	ACCN4.aAug10,ACCN4.bAug10,ACCN4.cAug10,ACCN4.dAug10,ACCN4.eAug10,ACCN4.fAug10,ACCN4.gAug10	uc002vly.1,uc002vlz.2,uc002vma.2,uc002vmb.2,uc010fwi.1,uc010fwj.1	1.73459	-0.105969
11:26655862:+,11:26656560:+	5.19655	-1.7274	6.89618	1.04241e-08	3.38502e-07	4.69329	ANO3	core	NM_031418	ENST00000256737,ENST00000525139,ENST00000531568,ENST00000537978,ENST00000538001	ANO3.aAug10,ANO3.bAug10,ANO3.cAug10	uc001mqt.3,uc010rdr.1,uc010rds.1,uc010rdt.1	5.45906	-0.262505
11:20968981:+,11:20981978:+	1.60709	0.488776	6.89317	1.0536e-08	3.41804e-07	9.60014	NELL1	core	NM_006157,NM_201551	ENST00000298925,ENST00000325319,ENST00000357134,ENST00000530672,ENST00000532434	NELL1.aAug10,NELL1.bAug10,NELL1.cAug10,NELL1.dAug10,NELL1.lAug10	uc001mqe.2,uc001mqf.2,uc009yid.2,uc010rdo.1,uc010rdp.1	1.41287	0.194225
7:111379533:+,7:111381150:+	2.59274	-0.00906479	6.8912	1.06094e-08	3.43517e-07	8.50684	DOCK4	core	NM_014705	ENST00000342288,ENST00000352877,ENST00000423057,ENST00000428084,ENST00000437633,ENST00000445943,ENST00000494651	DOCK4.aAug10,DOCK4.bAug10,DOCK4.cAug10,DOCK4.eAug10,DOCK4.fAug10	uc003vfw.2,uc003vfx.2,uc003vfy.2,uc011kml.1,uc011kmm.1	1.92237	0.670365
8:27094422:+,8:27097488:+	2.30291	0.835054	6.89007	1.06521e-08	3.44678e-07	8.81821	STMN4	core	NM_030795	ENST00000265770,ENST00000350889	STMN4.cAug10,STMN4.eAug10	uc003xfj.2,uc003xfk.2	2.3291	-0.0261922
2:149798172:+,2:149798449:+	1.0637	2.75519	6.88866	1.07052e-08	3.46059e-07	9.82752	KIF5C	core	NM_004522	ENST00000334436,ENST00000414838,ENST00000435030	KIF5C.aAug10	uc010zbu.1	1.0984	-0.034706
6:30645065:+,6:30646956:+	1.07667	2.18514	6.87809	1.11131e-08	3.57631e-07	9.78943	KIAA1949	core	NM_001134870,NM_133471	ENST00000274853,ENST00000399199,ENST00000467662,ENST00000488324	KIAA1949.aAug10,KIAA1949.bAug10,KIAA1949.dAug10,KIAA1949.fAug10	uc003nra.2,uc003nrb.3	1.01172	0.0649452
11:26646045:+,11:26655751:+	5.12443	-2.1943	6.86693	1.15607e-08	3.70015e-07	4.57731	ANO3	core	NM_031418	ENST00000256737,ENST00000525139,ENST00000531568,ENST00000537978,ENST00000538001	ANO3.aAug10,ANO3.bAug10,ANO3.cAug10	uc001mqt.3,uc010rdr.1,uc010rds.1,uc010rdt.1	5.45906	-0.334622
7:94228275:+,7:94229958:+	2.21876	0.852251	6.86638	1.15833e-08	3.70621e-07	8.87581	SGCE	core	NM_001099400	ENST00000428696,ENST00000447873	SGCE.bAug10,SGCE.eAug10	uc003unk.2,uc003unn.2	0.821352	1.39741
5:99897892:+,5:99921885:+	1.03913	2.54605	6.86602	1.1598e-08	3.70972e-07	9.75055	FAM174A	core	NM_198507	ENST00000312637	FAM174A.aAug10	uc003knj.1	1.03426	0.00487258
2:232121333:+,2:232123704:+	1.17631	1.88032	6.86373	1.16925e-08	3.73519e-07	9.73155	ARMC9	core	NM_025139	ENST00000349938,ENST00000359743,ENST00000436339,ENST00000483477	ARMC9.aAug10,ARMC9.bAug10,ARMC9.cAug10	uc002vrp.3,uc002vrq.3	0.862195	0.31412
6:145079125:+,6:145093043:+	1.09731	1.87007	6.85229	1.21757e-08	3.86613e-07	9.70148	UTRN	core	NM_007124	ENST00000367526,ENST00000367545	UTRN.aAug10	uc003qkt.2	0.847478	0.249827
3:186681714:+,3:186756530:+	1.72902	1.52718	6.85051	1.22524e-08	3.88313e-07	9.4713	ST6GAL1	core	NM_173216,NM_173217	ENST00000169298,ENST00000417392,ENST00000430309,ENST00000457772,ENST00000458216	ST6GAL1.eAug10,ST6GAL1.hAug10,ST6GAL1.oAug10,ST6GAL1.vbAug10,ST6GAL1.vcAug10	uc003frb.2,uc003frc.2	1.40289	0.326131
12:19440490:+,12:19473496:+	1.36958	1.56046	6.84872	1.23303e-08	3.9041e-07	9.59535	PLEKHA5	core	NM_019012	ENST00000299275,ENST00000317589,ENST00000359180,ENST00000536974,ENST00000539256	PLEKHA5.cAug10,PLEKHA5.fAug10,PLEKHA5.gAug10	uc001reb.2,uc009zin.2,uc010sih.1	1.25147	0.118106
12:111856681:+,12:111884557:+	1.52433	1.41199	6.81133	1.40746e-08	4.39942e-07	9.37634	SH2B3	core	NM_005475	ENST00000341259	SH2B3.aAug10,SH2B3.bAug10	uc001tse.2,uc001tsf.2,uc010syf.1	1.94013	-0.415802
2:112843681:+,2:112847202:+	1.97076	1.18443	6.80096	1.46009e-08	4.54692e-07	8.99137	TMEM87B	core	NM_032824	ENST00000283206,ENST00000463427	TMEM87B.aAug10,TMEM87B.bAug10	uc002thm.2	1.73822	0.232536
10:99517480:+,10:99518993:+	1.37344	1.65752	6.78847	1.52609e-08	4.73479e-07	9.3943	ZFYVE27	core	NM_001002261,NM_001002262,NM_001174119,NM_001174120,NM_001174121,NM_001174122,NM_144588	ENST00000337540,ENST00000356257,ENST00000357540,ENST00000359980,ENST00000370610,ENST00000370613,ENST00000393677,ENST00000423811,ENST00000453958,ENST00000477521	ZFYVE27.aAug10,ZFYVE27.bAug10,ZFYVE27.cAug10,ZFYVE27.dAug10,ZFYVE27.eAug10,ZFYVE27.fAug10,ZFYVE27.gAug10,ZFYVE27.hAug10,ZFYVE27.iAug10,ZFYVE27.jAug10,ZFYVE27.kAug10,ZFYVE27.lAug10,ZFYVE27.mAug10,ZFYVE27.oAug10,ZFYVE27.pAug10,ZFYVE27.sAug10	uc001kol.1,uc001kom.1,uc001kon.2,uc001koo.2,uc001kop.2,uc001koq.2,uc010qpa.1,uc010qpb.1,uc010qpc.1,uc010qpd.1	1.19552	0.177919
12:31451158:+,12:31457920:+	1.20865	2.17382	6.78402	1.55031e-08	4.8025e-07	9.45591	FAM60A	core	NM_021238	None	FAM60A.dAug10,FAM60A.oAug10	uc010ska.1	0.218556	0.990095
17:40642655:+,17:40646352:+	1.1832	1.98312	6.78036	1.57053e-08	4.85314e-07	9.44176	ATP6V0A1	core	NM_001130020,NM_001130021,NM_005177	ENST00000264649,ENST00000343619,ENST00000393829,ENST00000537728,ENST00000544137,ENST00000546249	ATP6V0A1.aAug10,ATP6V0A1.bAug10,ATP6V0A1.cAug10,ATP6V0A1.dAug10,ATP6V0A1.eAug10,ATP6V0A1.fAug10,ATP6V0A1.gAug10,ATP6V0A1.iAug10,ATP6V0A1.oAug10	uc002hzq.2,uc002hzr.2,uc002hzs.2,uc010cyg.2,uc010wgj.1,uc010wgk.1,uc010wgl.1	0.961028	0.222175
22:25853368:+,22:25855383:+	1.02803	2.42146	6.77958	1.57487e-08	4.86507e-07	9.45702	CRYBB2P1	core	NR_033733,NR_033734	ENST00000354451,ENST00000382734,ENST00000415709,ENST00000509460	CRYBB2P1andADRBK2.jAug10,CRYBB2P1andADRBK2.kAug10,CRYBB2P1andADRBK2.nAug10,CRYBB2P1andADRBK2.pAug10,CRYBB2P1andADRBK2.sAug10,CRYBB2P1andADRBK2.vbAug10,CRYBB2P1andADRBK2.vdAug10,CRYBB2P1andADRBK2.veAug10,CRYBB2P1andADRBK2.vfAug10,CRYBB2P1andADRBK2.vgAug10,CRYBB2P1andADRBK2.vhAug10,CRYBB2P1andADRBK2.viAug10	uc003abt.2,uc003abu.2,uc003abv.2	1.0795	-0.0514737
3:33653563:+,3:33661095:+	1.01863	2.45852	6.77929	1.57647e-08	4.86851e-07	9.45642	CLASP2	core	NM_001207044,NM_015097	ENST00000307312,ENST00000313350,ENST00000333778,ENST00000359576,ENST00000399362,ENST00000461133,ENST00000468888,ENST00000480013,ENST00000485378,ENST00000487200,ENST00000539981	CLASP2.aAug10,CLASP2.bAug10,CLASP2.cAug10,CLASP2.dAug10,CLASP2.eAug10,CLASP2.fAug10,CLASP2.gAug10,CLASP2.hAug10,CLASP2.iAug10	uc003cft.2,uc003cfu.2,uc003cfv.2,uc003cfw.2,uc010hgb.2,uc011axt.1,uc011axu.1	0.672544	0.346088
12:77254193:+,12:77256956:+	1.52647	0.637702	6.76824	1.63936e-08	5.03944e-07	9.24874	CSRP2	core	NM_001321	ENST00000311083,ENST00000546966,ENST00000547435	CSRP2.bAug10,CSRP2.cAug10,CSRP2.dAug10	uc001syl.1	1.16966	0.356819
6:33541684:+,6:33541811:+	1.25906	1.92205	6.76301	1.66996e-08	5.1225e-07	9.36429	BAK1	core	NM_001188	ENST00000360661,ENST00000374460,ENST00000374467,ENST00000442998	BAK1.aAug10,BAK1.bAug10,BAK1.eAug10,BAK1.fAug10	uc003oer.2,uc003oes.2,uc003oet.2,uc003oeu.2,uc010jvb.2	0.990983	0.268073
6:166836905:+,6:166843941:+	1.46967	1.45709	6.76276	1.67145e-08	5.12395e-07	9.24131	RPS6KA2	core	NM_001006932,NM_021135	ENST00000265678,ENST00000405189,ENST00000481261,ENST00000503859,ENST00000510118	RNASET2andRPS6KA2.aAug10,RNASET2andRPS6KA2.bAug10,RNASET2andRPS6KA2.cAug10,RNASET2andRPS6KA2.dAug10,RNASET2andRPS6KA2.eAug10	uc003qvb.1,uc003qvc.1,uc003qvd.1,uc010kkl.1,uc011ego.1	1.39312	0.0765523
4:70897824:+,4:70898884:+	4.86517	-1.39816	6.75998	1.68798e-08	5.1667e-07	4.48787	HTN3	core	NM_000200	ENST00000526767,ENST00000529625,ENST00000530128,ENST00000533547	STATHandHTN3andHTN1.dAug10,STATHandHTN3andHTN1.kAug10,STATHandHTN3andHTN1.qAug10,STATHandHTN3andHTN1.tAug10,STATHandHTN3andHTN1.vbAug10,STATHandHTN3andHTN1.vfAug10,STATHandHTN3andHTN1.vgAug10	uc003hew.2	4.49792	0.367255
9:12776026:+,9:12821385:+	2.50931	0.180792	6.75455	1.72075e-08	5.2638e-07	8.15802	C9orf150	core	NM_203403	ENST00000319264	C9orf150.aAug10	uc003zkw.2	2.51271	-0.00339931
15:74494623:+,15:74495054:+	1.31746	1.32141	6.75205	1.73605e-08	5.30574e-07	9.29831	STRA6	core	NM_022369	ENST00000395105,ENST00000536129	STRA6.gAug10,STRA6.rAug10,STRA6.uAug10,STRA6.vmAug10	uc002axk.2	1.03787	0.279585
5:161300343:+,5:161302566:+	2.29574	-0.218707	6.75165	1.73851e-08	5.31003e-07	8.45337	GABRA1	core	NM_000806,NM_001127643,NM_001127644,NM_001127645,NM_001127646,NM_001127647,NM_001127648	ENST00000023897,ENST00000393943,ENST00000420560,ENST00000428797,ENST00000437025,ENST00000444819,ENST00000519542	GABRA1.aAug10,GABRA1.bAug10,GABRA1.cAug10,GABRA1.dAug10,GABRA1.eAug10,GABRA1.fAug10,GABRA1.gAug10,GABRA1.hAug10,GABRA1.iAug10	uc003lyx.3,uc010jiw.2,uc010jix.2,uc010jiy.2,uc010jiz.2,uc010jja.2,uc010jjb.2	1.9971	0.298635
21:22881376:+,21:22906858:+	1.08398	2.43821	6.73314	1.8562e-08	5.62492e-07	9.29984	NCAM2	core	NM_004540	ENST00000284894,ENST00000400546	NCAM2.aAug10,NCAM2.bAug10	uc002yld.1,uc011acb.1	0.850367	0.233615
5:161322874:+,5:161324117:+	1.90158	0.291164	6.73075	1.87197e-08	5.66589e-07	8.88372	GABRA1	core	NM_000806,NM_001127643,NM_001127644,NM_001127645,NM_001127646,NM_001127647,NM_001127648	ENST00000023897,ENST00000393943,ENST00000420560,ENST00000428797,ENST00000437025,ENST00000444819	GABRA1.aAug10,GABRA1.bAug10,GABRA1.cAug10,GABRA1.dAug10,GABRA1.eAug10,GABRA1.fAug10,GABRA1.gAug10	uc003lyx.3,uc010jiw.2,uc010jix.2,uc010jiy.2,uc010jiz.2,uc010jja.2,uc010jjb.2	1.9971	-0.0955273
7:83606512:+,7:83610637:+	1.20702	1.43865	6.71899	1.95157e-08	5.88194e-07	9.24967	SEMA3A	core	NM_006080	ENST00000265362,ENST00000436949	SEMA3A.aAug10	uc003uhz.2	1.12314	0.0838738
3:152163328:+,3:152165409:+	1.52043	1.12418	6.71546	1.97611e-08	5.94874e-07	9.10467	MBNL1	core	NM_021038,NM_207292,NM_207294,NM_207295,NM_207297	ENST00000282488,ENST00000324210,ENST00000355460,ENST00000357472,ENST00000464596,ENST00000465907,ENST00000485910,ENST00000492948,ENST00000545754	MBNL1.bAug10,MBNL1.cAug10,MBNL1.eAug10,MBNL1.gAug10,MBNL1.hAug10,MBNL1.iAug10,MBNL1.jAug10,MBNL1.mAug10	uc003ezh.2,uc003ezi.2,uc003ezl.2,uc003ezn.2,uc003ezo.2	0.446673	1.07376
5:99871668:+,5:99897758:+	1.03344	2.42125	6.71029	2.0126e-08	6.04587e-07	9.22213	FAM174A	core	NM_198507	ENST00000312637,ENST00000505111	FAM174A.aAug10	uc003knj.1	1.03426	-0.0008215
7:24870524:+,7:24874105:+	1.55101	1.11304	6.70934	2.01937e-08	6.06076e-07	9.03119	OSBPL3	core	NM_015550,NM_145320,NM_145321,NM_145322	ENST00000313367,ENST00000352860,ENST00000353930,ENST00000396429,ENST00000396431,ENST00000409069,ENST00000431825	OSBPL3.aAug10,OSBPL3.bAug10,OSBPL3.cAug10,OSBPL3.dAug10	uc003sxf.2,uc003sxg.2,uc003sxh.2,uc003sxi.2	1.34571	0.2053
1:111492745:+,1:111506243:+	2.06246	0.642124	6.70449	2.0543e-08	6.1564e-07	8.58647	C1orf103	core	NM_001006945	ENST00000485275	C1orf103.cAug10,C1orf103.dAug10	uc001eab.2,uc001eac.1	0.340746	1.72171
6:71233824:+,6:71234634:+	1.58373	1.11241	6.70079	2.08137e-08	6.23378e-07	8.99419	FAM135A	core	NM_001105531,NM_020819	ENST00000194672,ENST00000361499,ENST00000370479,ENST00000457062,ENST00000505769	FAM135A.bAug10,FAM135A.cAug10	uc003pfh.2,uc003pfi.2,uc003pfl.2,uc003pfn.2	0.448185	1.13554
15:74495439:+,15:74501729:+	1.36763	1.07398	6.69935	2.09205e-08	6.26014e-07	9.09385	STRA6	extended	None	ENST00000558645,ENST00000560148,ENST00000561332	mokama.cAug10,mokama.dAug10,mokama.eAug10	None	1.03787	0.329759
2:202245941:+,2:202248834:+	1.00908	2.19679	6.6987	2.09683e-08	6.26884e-07	9.18168	TRAK2	core	NM_015049	ENST00000332624,ENST00000542292	TRAK2andALS2CR12.aAug10,TRAK2andALS2CR12.bAug10	uc002uyb.3	1.09976	-0.0906826
4:71655309:+,4:71656942:+	1.79861	1.69198	6.69531	2.12214e-08	6.33006e-07	8.77221	RUFY3	core	NM_014961	ENST00000226328,ENST00000536664	RUFY3.dAug10,RUFY3.eAug10	uc003hfq.2,uc011cax.1	0.201088	1.59753
1:151678837:+,1:151679145:+	2.32804	0.620359	6.69415	2.1309e-08	6.35176e-07	8.469	CELF3	core	NM_001172648,NM_001172649,NM_007185	ENST00000290583,ENST00000290585,ENST00000420342,ENST00000470688	CELF3.aAug10,CELF3.bAug10,CELF3.eAug10,CELF3.fAug10	uc001eyr.2,uc001eys.1,uc009wmy.2	2.01186	0.31618
16:1812482:+,16:1812676:+	1.89948	1.04826	6.69372	2.13418e-08	6.35778e-07	8.69136	MAPK8IP3	core	NM_001040439,NM_015133	ENST00000250894,ENST00000356010	MAPK8IP3.aAug10,MAPK8IP3.bAug10,MAPK8IP3.cAug10	uc002cmk.2,uc002cml.2,uc010uvl.1	1.14252	0.756958
9:115478821:+,9:115480267:+	1.20206	1.95282	6.69257	2.14285e-08	6.3817e-07	9.13642	C9orf80	core	NM_021218	ENST00000374238,ENST00000374242,ENST00000476599,ENST00000481146,ENST00000497712	C9orf80.aAug10,C9orf80.bAug10,C9orf80.dAug10,C9orf80.hAug10,C9orf80.iAug10,C9orf80.jAug10,C9orf80.lAug10	uc004bgg.2,uc010muk.2	1.14703	0.0550304
X:148582568:+,X:148583605:+	2.0095	0.736638	6.69099	2.15486e-08	6.40986e-07	8.55613	IDS	extended	None	ENST00000464251	IDS.cAug10,IDS.dAug10,IDS.kAug10,IDS.vbAug10	uc011mxg.1	0.937264	1.07224
20:23375636:+,20:23375776:+	1.34395	1.65135	6.68712	2.18459e-08	6.49442e-07	9.07777	NAPB	core	NM_022080	ENST00000377026,ENST00000431864,ENST00000432543	NAPB.aAug10,NAPB.bAug10,NAPB.cAug10,NAPB.dAug10,NAPB.gAug10,NAPB.hAug10,NAPB.iAug10,NAPB.jAug10,NAPB.lAug10,NAPB.mAug10,NAPB.pAug10	uc002wta.2,uc002wtb.2,uc010zss.1,uc010zst.1	1.24026	0.103695
1:94037398:+,1:94041571:+	1.03467	2.28395	6.67179	2.30643e-08	6.82223e-07	9.09166	BCAR3	core	NM_003567	ENST00000260502,ENST00000370243,ENST00000370244,ENST00000370247,ENST00000539242	BCAR3.aAug10,BCAR3.bAug10,BCAR3.cAug10,BCAR3.dAug10,BCAR3.eAug10,BCAR3.fAug10	uc001dpx.3,uc001dpy.2,uc001dpz.2,uc001dqa.2,uc001dqb.2,uc009wdm.1	0.912148	0.122523
7:111424008:+,7:111428718:+	2.01512	0.411806	6.66982	2.32257e-08	6.86189e-07	8.44345	DOCK4	core	NM_014705	ENST00000352877,ENST00000437633,ENST00000464338,ENST00000492436	DOCK4.bAug10,DOCK4.lAug10,DOCK4.nAug10	uc003vfx.2	1.92237	0.092748
4:70894233:+,4:70896445:+	4.775	-1.61974	6.66861	2.33249e-08	6.88713e-07	4.30994	HTN3	core	NM_000200	ENST00000381057,ENST00000526767,ENST00000528003,ENST00000529625,ENST00000530128,ENST00000533547	STATHandHTN3andHTN1.kAug10,STATHandHTN3andHTN1.nAug10,STATHandHTN3andHTN1.qAug10,STATHandHTN3andHTN1.tAug10,STATHandHTN3andHTN1.vbAug10,STATHandHTN3andHTN1.vfAug10,STATHandHTN3andHTN1.vgAug10,STATHandHTN3andHTN1.viAug10	uc003hew.2	4.49792	0.277087
2:202252724:+,2:202254023:+	1.14804	2.02705	6.66704	2.34555e-08	6.92365e-07	9.0753	TRAK2	core	NM_015049	ENST00000332624,ENST00000542292	TRAK2andALS2CR12.aAug10	uc002uyb.3	1.09976	0.0482771
7:24911688:+,7:24931996:+	1.00311	2.25584	6.6609	2.39705e-08	7.05515e-07	9.05431	OSBPL3	core	NM_015550,NM_145320,NM_145321,NM_145322	ENST00000313367,ENST00000352860,ENST00000353930,ENST00000396429,ENST00000396431,ENST00000409069,ENST00000409452,ENST00000409555,ENST00000409759,ENST00000409863,ENST00000415162,ENST00000415952,ENST00000431825,ENST00000441059	OSBPL3.aAug10,OSBPL3.bAug10,OSBPL3.cAug10,OSBPL3.dAug10,OSBPL3.eAug10,OSBPL3.fAug10,OSBPL3.iAug10	uc003sxd.2,uc003sxe.2,uc003sxf.2,uc003sxg.2,uc003sxh.2,uc003sxi.2	1.34571	-0.342607
4:148461637:+,4:148463630:+	1.76134	0.405878	6.66089	2.39713e-08	7.05515e-07	8.72154	EDNRA	core	NM_001166055,NM_001256283,NM_001957,NR_028596,NR_045958	ENST00000324300,ENST00000339690,ENST00000358556,ENST00000503721,ENST00000506066,ENST00000510697,ENST00000511804	EDNRA.aAug10,EDNRA.bAug10,EDNRA.cAug10,EDNRA.dAug10	uc003iky.2,uc010ipf.1,uc010ipg.1,uc011cid.1	1.78243	-0.021093
7:150931360:+,7:150932134:+	1.01622	2.37953	6.6558	2.44068e-08	7.17489e-07	9.03733	CHPF2	core	NM_019015	ENST00000035307,ENST00000377851,ENST00000495645	CHPF2.aAug10,CHPF2.bAug10	uc003wjq.1,uc003wjr.1	1.0545	-0.0382783
4:148407253:+,4:148441003:+	1.82422	0.225473	6.64894	2.50073e-08	7.32349e-07	8.60403	EDNRA	core	NM_001957,NR_045958	ENST00000324300,ENST00000394047,ENST00000510697	EDNRA.aAug10,EDNRA.dAug10	uc003iky.2,uc010ipf.1	1.78243	0.0417942
6:126242214:+,6:126243828:+	1.02544	2.22447	6.64778	2.51098e-08	7.3428e-07	9.00888	NCOA7	core	NM_001122842,NM_001199619,NM_001199620,NM_001199621,NM_001199622,NM_181782	ENST00000229634,ENST00000368353,ENST00000368357,ENST00000392477,ENST00000433571,ENST00000438495,ENST00000444128,ENST00000448104	NCOA7.aAug10,NCOA7.bAug10,NCOA7.cAug10,NCOA7.dAug10,NCOA7.eAug10,NCOA7.fAug10,NCOA7.iAug10,NCOA7.jAug10,NCOA7.kAug10,NCOA7.lAug10	uc003qae.3,uc003qah.2,uc003qai.2,uc003qak.2,uc010kes.2,uc010ket.2	0.748426	0.277016
5:52243291:+,5:52248237:+	1.00142	2.31306	6.64024	2.57894e-08	7.50214e-07	8.98056	ITGA1	core	NM_181501	ENST00000282588,ENST00000504669,ENST00000506275	PELOandITGA1andRPL17P21.aAug10,PELOandITGA1andRPL17P21.bAug10,PELOandITGA1andRPL17P21.cAug10,PELOandITGA1andRPL17P21.fAug10	uc003jou.2,uc003jov.2,uc003jow.2	0.922298	0.0791238
16:1812732:+,16:1812837:+	1.56931	1.55731	6.63397	2.63684e-08	7.64173e-07	8.78878	MAPK8IP3	core	NM_001040439,NM_015133	ENST00000250894,ENST00000356010	MAPK8IP3.aAug10,MAPK8IP3.bAug10,MAPK8IP3.cAug10	uc002cmk.2,uc002cml.2,uc010uvl.1	1.14252	0.426792
10:121196353:+,10:121199243:+	1.86254	0.521553	6.63213	2.65403e-08	7.68711e-07	8.51348	GRK5	core	NM_005308	ENST00000369108,ENST00000392870	GRK5.aAug10,GRK5.bAug10,GRK5.cAug10	uc001led.2,uc009xzh.2	1.59445	0.268087
6:145095500:+,6:145103058:+	1.11745	1.60825	6.6289	2.68453e-08	7.76422e-07	8.93912	UTRN	core	NM_007124	ENST00000367526,ENST00000367545	UTRN.aAug10	uc003qkt.2	0.847478	0.269967
16:3071320:+,16:3071556:+	2.20586	0.859507	6.62719	2.70088e-08	7.80925e-07	8.16956	TNFRSF12A	core	NM_016639	ENST00000326577	TNFRSF12A.bAug10,TNFRSF12A.cAug10,TNFRSF12A.dAug10,TNFRSF12A.fAug10	uc002csv.3	1.88705	0.318817
11:26581326:+,11:26619912:+	5.07654	-2.17167	6.6207	2.7636e-08	7.96533e-07	4.18079	ANO3,MUC15	core	NM_031418	ENST00000256737,ENST00000525139,ENST00000531568,ENST00000537978,ENST00000538001	ANO3.aAug10,ANO3.bAug10,ANO3.cAug10	uc001mqt.3,uc010rdr.1,uc010rds.1,uc010rdt.1	5.60117	-0.524627
13:35619184:+,13:35619443:+	1.20913	1.86189	6.61989	2.77152e-08	7.98358e-07	8.88778	NBEA	core	NM_015678	ENST00000310336,ENST00000379939,ENST00000400445,ENST00000402346,ENST00000422518,ENST00000540320	NBEA.aAug10	uc001uvb.2	0.799454	0.409677
5:140874432:+,5:140884960:+	1.06355	2.38286	6.61152	2.85483e-08	8.18591e-07	8.88759	PCDHGA1,PCDHGA10,PCDHGA11,PCDHGA12,PCDHGA2,PCDHGA3,PCDHGA4,PCDHGA5,PCDHGA6,PCDHGA7,PCDHGA8,PCDHGA9,PCDHGB1,PCDHGB2,PCDHGB3,PCDHGB4,PCDHGB5,PCDHGB6,PCDHGB7,PCDHGC3,PCDHGC4,PCDHGC5	core	NM_002588,NM_003735,NM_003736,NM_018912,NM_018913,NM_018914,NM_018915,NM_018916,NM_018917,NM_018918,NM_018919,NM_018920,NM_018921,NM_018922,NM_018923,NM_018924,NM_018925,NM_018926,NM_018927,NM_018928,NM_018929,NM_032088,NM_032092,NM_032403	ENST00000252085,ENST00000252087,ENST00000253812,ENST00000306593,ENST00000308177,ENST00000394576,ENST00000398587,ENST00000398594,ENST00000398604,ENST00000398610,ENST00000517417,ENST00000517434,ENST00000518069,ENST00000518325,ENST00000518882,ENST00000519479,ENST00000520790,ENST00000522605,ENST00000523390	PCDHG_.aAug10,PCDHG_.bAug10,PCDHG_.cAug10,PCDHG_.dAug10,PCDHG_.eAug10,PCDHG_.fAug10,PCDHG_.gAug10,PCDHG_.hAug10,PCDHG_.iAug10,PCDHG_.jAug10,PCDHG_.kAug10,PCDHG_.lAug10,PCDHG_.mAug10,PCDHG_.nAug10,PCDHG_.oAug10,PCDHG_.pAug10,PCDHG_.qAug10,PCDHG_.rAug10,PCDHG_.sAug10,PCDHG_.tAug10,PCDHG_.uAug10,PCDHG_.vaAug10,PCDHG_.vwAug10,PCDHG_.vxAug10,PCDHG_.waAug10,PCDHG_.wbAug10,PCDHG_.wcAug10,PCDHG_.wdAug10	uc003lji.1,uc003ljk.1,uc003ljm.1,uc003ljo.1,uc003ljq.1,uc003ljs.1,uc003lju.1,uc003ljw.1,uc003ljy.1,uc003lka.1,uc003lkc.1,uc003lkd.1,uc003lkf.1,uc003lkh.1,uc003lkj.1,uc003lkl.1,uc003lkn.1,uc003lkp.1,uc003lkq.1,uc003lkt.1,uc003lkv.1,uc003lkw.1,uc003lky.1,uc003lla.1,uc010jfx.1	1.07152	-0.00797695
19:4364218:+,19:4365479:+	1.03182	2.39781	6.60283	2.94409e-08	8.38668e-07	8.85813	SH3GL1	core	NM_003025	ENST00000269886	SH3GL1.aAug10,SH3GL1.eAug10	uc002maj.2	0.981822	0.0499952
7:83591142:+,7:83592521:+	1.11738	1.33581	6.59402	3.03729e-08	8.61302e-07	8.82404	SEMA3A	core	NM_006080	ENST00000265362,ENST00000436949	SEMA3A.aAug10	uc003uhz.2	1.12314	-0.00576374
5:14441469:+,5:14461128:+	1.59073	1.31582	6.59051	3.07525e-08	8.7108e-07	8.57163	TRIO	extended	None	ENST00000515710	TRIO.gAug10	uc003jfi.1	0.614629	0.976101
2:220402043:+,2:220402354:+	1.69623	1.16544	6.58796	3.10319e-08	8.77012e-07	8.48077	ACCN4	core	NM_018674,NM_182847	ENST00000347842,ENST00000358078	ACCN4.aAug10,ACCN4.bAug10	uc002vlz.2,uc002vma.2	1.73459	-0.0383567
16:2747998:+,16:2749822:+	1.0161	2.48467	6.57692	3.22682e-08	9.06331e-07	8.77016	KCTD5	core	NM_018992	ENST00000301738	KCTD5.cAug10,KCTD5.dAug10	uc002crd.2	0.87375	0.14235
6:166827419:+,6:166831713:+	1.61338	1.20384	6.5721	3.28228e-08	9.19847e-07	8.49966	RPS6KA2	core	NM_001006932,NM_021135	ENST00000265678,ENST00000405189,ENST00000481261,ENST00000503859,ENST00000509742,ENST00000510118	RNASET2andRPS6KA2.aAug10,RNASET2andRPS6KA2.bAug10,RNASET2andRPS6KA2.cAug10,RNASET2andRPS6KA2.dAug10,RNASET2andRPS6KA2.eAug10,RNASET2andRPS6KA2.sAug10	uc003qvb.1,uc003qvc.1,uc003qvd.1,uc010kkk.1,uc010kkl.1,uc011ego.1	1.39312	0.220265
7:121019068:+,7:121023011:+	1.03562	2.26753	6.57031	3.30322e-08	9.24056e-07	8.74652	FAM3C	core	NM_001040020,NM_014888	ENST00000359943,ENST00000412653,ENST00000455828	FAM3C.aAug10,FAM3C.bAug10,FAM3C.dAug10,FAM3C.eAug10,FAM3C.fAug10,FAM3C.gAug10,FAM3C.mAug10	uc003vjx.2,uc010lkm.2	1.05921	-0.0235866
4:167983801:+,4:168155136:+	1.5344	0.567936	6.56242	3.39673e-08	9.45313e-07	8.52525	SPOCK3	core	NM_016950	ENST00000502330,ENST00000502741,ENST00000511531,ENST00000512042	None	uc003iri.1,uc011cjw.1	1.01038	0.524022
8:23702553:+,8:23708833:+	1.42103	0.878194	6.5597	3.42959e-08	9.5287e-07	8.61341	STC1	core	NM_003155	ENST00000290271,ENST00000524323,ENST00000540277	STC1.aAug10,STC1.bAug10	uc003xdw.1	1.41358	0.00744211
14:51467558:+,14:51475798:+	1.13148	2.42413	6.55618	3.4726e-08	9.63899e-07	8.69725	TRIM9	core	NM_015163,NM_052978	ENST00000298355,ENST00000360392	TRIM9.bAug10,TRIM9.cAug10	uc001wyx.3,uc001wyz.3	0.854268	0.277208
X:153060209:+,X:153061118:+	1.39182	1.65555	6.54922	3.55923e-08	9.85341e-07	8.59164	SSR4	core	NR_037927	ENST00000471880,ENST00000482902,ENST00000491833	SSR4.aAug10,SSR4.iAug10,SSR4.kAug10,SSR4.lAug10,SSR4.mAug10,SSR4.pAug10	None	0.214385	1.17743
2:149861978:+,2:149864477:+	1.09356	2.48627	6.54375	3.62876e-08	1.00265e-06	8.65603	KIF5C	core	NM_004522	ENST00000334436,ENST00000397413,ENST00000414838,ENST00000435030,ENST00000464066,ENST00000482151	KIF5C.aAug10,KIF5C.bAug10,KIF5C.dAug10	uc002tws.1,uc002twu.1,uc010zbu.1	1.0984	-0.0048418
5:67586662:+,5:67588087:+	1.23478	2.2861	6.53553	3.73584e-08	1.02956e-06	8.59191	PIK3R1	core	NM_181504	ENST00000336483,ENST00000518292	PIK3R1.cAug10,PIK3R1.fAug10	uc003jvd.2	0.636432	0.598346
5:146080705:+,5:146257565:+	1.59216	1.68201	6.53323	3.76638e-08	1.03724e-06	8.4106	PPP2R2B	core	NM_001127381,NM_004576,NM_181674,NM_181675	ENST00000356826,ENST00000394409,ENST00000394411,ENST00000394413,ENST00000394414,ENST00000453001,ENST00000504565,ENST00000509721,ENST00000530902	PPP2R2B.aAug10,PPP2R2B.bAug10,PPP2R2B.cAug10,PPP2R2B.fAug10,PPP2R2B.gAug10,PPP2R2B.oAug10,PPP2R2B.qAug10,PPP2R2B.sAug10,PPP2R2B.uAug10,PPP2R2B.vcAug10,PPP2R2B.voAug10,PPP2R2B.vtAug10,PPP2R2B.vvAug10	uc003loe.2,uc003lof.3,uc003log.3,uc003loh.3,uc011dbv.1	1.87928	-0.287121
12:79441142:+,12:79496794:+	1.9827	0.364509	6.53125	3.79285e-08	1.04368e-06	8.044	SYT1	extended	None	ENST00000551304	SYT1.mAug10,SYT1.tAug10	None	0.848927	1.13378
13:96743823:+,13:97484744:+	1.95813	0.896172	6.5296	3.81511e-08	1.04922e-06	8.10738	HS6ST3	core	NM_153456	ENST00000376705	HS6ST3.aAug10	uc001vmw.2	1.94887	0.00926002
3:183898039:+,3:183898637:+	1.35998	1.83241	6.5256	3.86954e-08	1.06244e-06	8.55185	AP2M1	core	NM_001025205	ENST00000382456,ENST00000439647,ENST00000539646	AP2M1.aAug10,AP2M1.bAug10,AP2M1.cAug10,AP2M1.dAug10,AP2M1.eAug10,AP2M1.fAug10,AP2M1.gAug10,AP2M1.iAug10,AP2M1.jAug10	uc003fmw.2,uc003fmx.2,uc003fmy.2	1.18435	0.175629
11:113085233:+,11:113092018:+	1.21683	1.52342	6.52276	3.90856e-08	1.0711e-06	8.5592	NCAM1	core	NM_001242607,NM_181351	ENST00000316851,ENST00000397957,ENST00000401611,ENST00000529420,ENST00000531915	NCAM1.dAug10,NCAM1.eAug10,NCAM1.hAug10	uc001pno.2,uc001pnq.2,uc009yyq.1	0.587059	0.629775
22:33254125:+,22:33255167:+	1.54339	1.15809	6.51078	4.07787e-08	1.11082e-06	8.35204	SYN3,TIMP3	core	NM_000362	ENST00000266085,ENST00000538671	TIMP3.aAug10,TIMP3.cAug10	uc003anb.2	1.3101	0.233289
7:121023064:+,7:121036216:+	1.28874	1.60685	6.49649	4.28942e-08	1.1637e-06	8.45093	FAM3C	core	NM_014888	ENST00000359943,ENST00000426156	FAM3C.aAug10,FAM3C.bAug10,FAM3C.cAug10,FAM3C.eAug10	uc003vjx.2	1.05921	0.22953
8:23709044:+,8:23709755:+	1.36393	0.708297	6.49533	4.30707e-08	1.16756e-06	8.40721	STC1	core	NM_003155	ENST00000290271,ENST00000524323,ENST00000540277	STC1.aAug10,STC1.bAug10	uc003xdw.1	1.41358	-0.0496563
4:70920167:+,4:70921215:+	4.91782	-1.86639	6.49418	4.32462e-08	1.17167e-06	3.92295	HTN1	core	NM_002159	ENST00000246896,ENST00000503645,ENST00000506754,ENST00000511674	STATHandHTN3andHTN1.cAug10,STATHandHTN3andHTN1.gAug10,STATHandHTN3andHTN1.jAug10,STATHandHTN3andHTN1.uAug10,STATHandHTN3andHTN1.vdAug10,STATHandHTN3andHTN1.veAug10,STATHandHTN3andHTN1.vhAug10	uc003hex.2	4.86394	0.0538874
4:15688771:+,4:15690174:+	2.06914	0.652742	6.49133	4.36845e-08	1.18163e-06	7.9334	FAM200B	extended	None	ENST00000502856,ENST00000503600,ENST00000504137,ENST00000504823,ENST00000505260,ENST00000506610,ENST00000515697	FAM200BandBST1.mAug10,FAM200BandBST1.nAug10,FAM200BandBST1.oAug10,FAM200BandBST1.pAug10,FAM200BandBST1.rAug10,FAM200BandBST1.tAug10,FAM200BandBST1.uAug10,FAM200BandBST1.vfAug10	uc003gog.2	0.377762	1.69138
4:151656518:+,4:151656613:+	4.95743	-1.56515	6.48974	4.39304e-08	1.18796e-06	3.98034	LRBA	novel	NONE	NONE	NONE	NONE	-0.0768926	5.03432
5:145980023:+,5:146017814:+	1.70991	1.56902	6.48646	4.44424e-08	1.19954e-06	8.13868	PPP2R2B	core	NM_001127381,NM_004576,NM_181674,NM_181675,NM_181676,NM_181677,NM_181678	ENST00000336640,ENST00000356826,ENST00000394409,ENST00000394410,ENST00000394411,ENST00000394413,ENST00000394414,ENST00000453001,ENST00000504198,ENST00000508545,ENST00000512639,ENST00000530902	PPP2R2B.aAug10,PPP2R2B.bAug10,PPP2R2B.cAug10,PPP2R2B.dAug10,PPP2R2B.eAug10,PPP2R2B.fAug10,PPP2R2B.gAug10,PPP2R2B.hAug10,PPP2R2B.iAug10,PPP2R2B.jAug10	uc003loe.2,uc003lof.3,uc003log.3,uc003loh.3,uc003loi.3,uc003loj.3,uc003lok.3,uc010jgm.2,uc011dbu.1,uc011dbv.1	1.87928	-0.169369
1:202932855:+,1:202933740:+	1.12553	1.81737	6.48221	4.51166e-08	1.2161e-06	8.44813	CYB5R1	core	NM_016243	ENST00000367249,ENST00000446185,ENST00000482572	CYB5R1.aAug10,CYB5R1.cAug10,CYB5R1.dAug10,CYB5R1.eAug10,CYB5R1.fAug10,CYB5R1.gAug10,CYB5R1.mAug10	uc001gyt.2,uc010pqe.1	0.811044	0.31449
21:40186316:+,21:40186705:+	1.3668	1.58279	6.48003	4.54661e-08	1.2242e-06	8.37755	ETS2	core	NM_001256295,NM_005239	ENST00000360214,ENST00000360938,ENST00000432278,ENST00000456966	ETS2.aAug10,ETS2.bAug10,ETS2.cAug10,ETS2.dAug10,ETS2.eAug10,ETS2.gAug10	uc002yxf.2,uc002yxg.2	1.78155	-0.414746
7:1192860:+,7:1195089:+	1.32807	1.49643	6.46845	4.73679e-08	1.26825e-06	8.344	ZFAND2A	core	NM_182491	ENST00000316495,ENST00000401903,ENST00000471448	ZFAND2A.bAug10,ZFAND2A.cAug10,ZFAND2A.dAug10	uc003skc.2	1.29269	0.0353773
17:61905283:+,17:61905498:+	1.67195	1.27363	6.46778	4.74804e-08	1.27093e-06	8.14732	PSMC5	core	NM_001199163	ENST00000375812	PSMC5.dAug10,PSMC5.oAug10,PSMC5.qAug10	uc002jcd.2	0.373979	1.29797
2:220401879:+,2:220401964:+	1.70305	1.11759	6.4672	4.75775e-08	1.27285e-06	8.07136	ACCN4	core	NM_018674,NM_182847	ENST00000347842,ENST00000358078,ENST00000474489	ACCN4.aAug10,ACCN4.bAug10,ACCN4.fAug10	uc002vlz.2,uc002vma.2,uc002vmb.2	1.73459	-0.0315344
2:202263077:+,2:202264100:+	1.06382	1.82513	6.46323	4.8251e-08	1.28949e-06	8.38552	TRAK2	core	NM_015049	ENST00000332624,ENST00000430254,ENST00000486291,ENST00000542292	TRAK2andALS2CR12.aAug10,TRAK2andALS2CR12.fAug10,TRAK2andALS2CR12.jAug10	uc002uyb.3,uc002uyc.2	1.09976	-0.0359398
1:36029027:+,1:36029368:+	1.30357	1.97079	6.45582	4.95327e-08	1.31637e-06	8.31389	NCDN	core	NM_001014839,NM_001014841,NM_014284	ENST00000356090,ENST00000373243,ENST00000373253,ENST00000423723	NCDN.aAug10,NCDN.bAug10,NCDN.cAug10,NCDN.dAug10	uc001bza.2,uc001bzb.2,uc001bzc.2	0.816182	0.487388
7:83634874:+,7:83636669:+	1.12036	1.34371	6.45461	4.97446e-08	1.3213e-06	8.35256	SEMA3A	core	NM_006080	ENST00000265362,ENST00000436949	SEMA3A.aAug10	uc003uhz.2	1.12314	-0.00278651
12:42866366:+,12:42983267:+	1.63448	0.780901	6.45285	5.0056e-08	1.32852e-06	8.12577	PRICKLE1	core	NM_153026	ENST00000345127	PRICKLE1.dAug10	uc001rnm.2	1.51598	0.118498
4:70896508:+,4:70897696:+	4.07666	-1.23582	6.45041	5.04892e-08	1.33815e-06	4.79807	HTN3	core	NM_000200	ENST00000381057,ENST00000526767,ENST00000529625,ENST00000530128,ENST00000533547	STATHandHTN3andHTN1.kAug10,STATHandHTN3andHTN1.qAug10,STATHandHTN3andHTN1.tAug10,STATHandHTN3andHTN1.vbAug10,STATHandHTN3andHTN1.vfAug10,STATHandHTN3andHTN1.vgAug10,STATHandHTN3andHTN1.viAug10	uc003hew.2	4.49792	-0.421255
10:121156284:+,10:121182678:+	1.7973	0.527702	6.43654	5.30276e-08	1.3974e-06	7.88398	GRK5	core	NM_005308	ENST00000369108,ENST00000392870,ENST00000457057	GRK5.aAug10,GRK5.bAug10,GRK5.cAug10,GRK5.dAug10,GRK5.fAug10	uc001led.2,uc009xzh.2,uc010qta.1	1.59445	0.202849
10:112266912:+,10:112269778:+	2.8055	0.2794	6.43421	5.34677e-08	1.40715e-06	6.66883	DUSP5	core	NM_004419	ENST00000369583,ENST00000468749	DUSP5.aAug10,DUSP5.bAug10,DUSP5.eAug10	uc001kzd.2	2.72669	0.0788086
19:55816954:+,19:55817620:+	1.10991	1.28719	6.43182	5.39219e-08	1.41719e-06	8.27551	BRSK1	core	NM_032430	ENST00000309383,ENST00000326848,ENST00000543410	BRSK1.aAug10,BRSK1.bAug10,BRSK1.cAug10	uc002qkf.2,uc002qkg.2,uc002qkh.2	0.913109	0.196797
12:79496835:+,12:79611283:+	1.96145	0.394637	6.43105	5.40676e-08	1.41995e-06	7.7093	SYT1	extended	None	ENST00000551304	SYT1.mAug10,SYT1.tAug10	None	0.848927	1.11252
7:111375223:+,7:111376973:+	2.14872	0.0225001	6.42975	5.4318e-08	1.42578e-06	7.5187	DOCK4	core	NM_014705	ENST00000352877,ENST00000428084,ENST00000437633,ENST00000445943,ENST00000486186,ENST00000494651	DOCK4.aAug10,DOCK4.bAug10,DOCK4.eAug10,DOCK4.hAug10	uc003vfv.2,uc003vfx.2,uc003vfy.2,uc011kml.1	1.92237	0.226344
21:40178044:+,21:40181959:+	1.81476	0.571662	6.42396	5.5442e-08	1.45224e-06	7.81732	ETS2	core	NM_001256295,NM_005239	ENST00000360214,ENST00000360938	ETS2.aAug10,ETS2.bAug10,ETS2.fAug10	uc002yxf.2,uc002yxg.2	1.78155	0.0332103
12:71519167:+,12:71523111:+	1.00736	1.70744	6.42034	5.61566e-08	1.46789e-06	8.24057	TSPAN8	core	NM_004616	ENST00000247829,ENST00000393330,ENST00000546561,ENST00000552128	TSPAN8.aAug10,TSPAN8.bAug10,TSPAN8.cAug10,TSPAN8.eAug10,TSPAN8.fAug10	uc001swj.1,uc001swk.1,uc009zrt.1	0.946266	0.0610918
7:55886916:+,7:55889602:+	1.70766	1.06919	6.41434	5.73615e-08	1.49549e-06	7.9383	2019-09-14	novel	NONE	NONE	NONE	NONE	1.65175	0.0559058
7:24903218:+,7:24904961:+	1.08521	1.98999	6.41074	5.80959e-08	1.51384e-06	8.20843	OSBPL3	core	NM_015550,NM_145320,NM_145321,NM_145322	ENST00000313367,ENST00000352860,ENST00000353930,ENST00000396429,ENST00000396431,ENST00000409069,ENST00000409452,ENST00000409555,ENST00000409759,ENST00000409863,ENST00000431825	OSBPL3.aAug10,OSBPL3.bAug10,OSBPL3.cAug10,OSBPL3.dAug10,OSBPL3.eAug10,OSBPL3.fAug10	uc003sxd.2,uc003sxe.2,uc003sxf.2,uc003sxg.2,uc003sxh.2,uc003sxi.2	1.34571	-0.260501
6:3154838:+,6:3177558:+	1.25792	1.88834	6.40841	5.85766e-08	1.52479e-06	8.15726	TUBB2A	novel	NONE	NONE	NONE	NONE	1.06517	0.19275
7:111617338:+,7:111624361:+	1.73075	0.632909	6.40765	5.87341e-08	1.52809e-06	7.86811	DOCK4	core	NM_014705	ENST00000342288,ENST00000352877,ENST00000428084,ENST00000437633,ENST00000445943,ENST00000468571,ENST00000476846,ENST00000544250	DOCK4.aAug10,DOCK4.bAug10,DOCK4.dAug10,DOCK4.gAug10,DOCK4.iAug10	uc003vfx.2,uc003vfy.2,uc003vga.1,uc003vgb.1,uc010ljt.1	1.92237	-0.191627
14:104220581:+,14:104223987:+	1.02077	2.31437	6.40704	5.88603e-08	1.53018e-06	8.19571	PPP1R13B	core	NM_015316	ENST00000202556,ENST00000380023,ENST00000554106,ENST00000557082	PPP1R13B.aAug10,PPP1R13B.bAug10,PPP1R13B.hAug10,PPP1R13B.iAug10,PPP1R13B.jAug10,PPP1R13B.uAug10	uc001yof.1,uc001yog.1	0.806724	0.214045
2:112832539:+,2:112834769:+	2.41417	0.507085	6.40612	5.9053e-08	1.5348e-06	7.20285	TMEM87B	core	NM_032824	ENST00000283206	TMEM87B.aAug10	uc002thm.2	1.73822	0.675948
7:24849570:+,7:24854678:+	1.04267	2.27707	6.40142	6.00425e-08	1.55608e-06	8.175	OSBPL3	core	NM_015550,NM_145320,NM_145321,NM_145322	ENST00000313367,ENST00000352860,ENST00000353930,ENST00000396429,ENST00000396431,ENST00000409069,ENST00000409452,ENST00000409555,ENST00000409759,ENST00000409863,ENST00000431825,ENST00000487020	OSBPL3.aAug10,OSBPL3.bAug10,OSBPL3.cAug10,OSBPL3.dAug10,OSBPL3.eAug10,OSBPL3.fAug10,OSBPL3.lAug10	uc003sxd.2,uc003sxe.2,uc003sxf.2,uc003sxg.2,uc003sxh.2,uc003sxi.2	1.34571	-0.303043
7:111487182:+,7:111503428:+	1.9038	0.580579	6.40051	6.02363e-08	1.55989e-06	7.75898	DOCK4	core	NM_014705	ENST00000342288,ENST00000352877,ENST00000423057,ENST00000428084,ENST00000437633,ENST00000445943,ENST00000544250	DOCK4.aAug10,DOCK4.bAug10,DOCK4.cAug10	uc003vfw.2,uc003vfx.2,uc003vfy.2	1.92237	-0.0185721
12:19475601:+,12:19489449:+	1.4403	1.27429	6.39649	6.1099e-08	1.57815e-06	8.03105	PLEKHA5	core	NM_001143821,NM_019012	ENST00000299275,ENST00000317589,ENST00000355397,ENST00000359180,ENST00000424268,ENST00000429027,ENST00000536974,ENST00000538068,ENST00000538714,ENST00000538972,ENST00000539256,ENST00000542828,ENST00000543806	PLEKHA5.aAug10,PLEKHA5.bAug10,PLEKHA5.cAug10,PLEKHA5.dAug10,PLEKHA5.eAug10,PLEKHA5.fAug10,PLEKHA5.gAug10,PLEKHA5.hAug10,PLEKHA5.jAug10	uc001rea.2,uc001reb.2,uc001rec.1,uc009zin.2,uc009zio.2,uc010sie.1,uc010sif.1,uc010sig.1,uc010sih.1	1.25147	0.188833
6:166883393:+,6:166902321:+	1.44279	1.50682	6.39151	6.21835e-08	1.60162e-06	8.01695	RPS6KA2	core	NM_001006932,NM_021135	ENST00000265678,ENST00000405189,ENST00000481261,ENST00000503859,ENST00000510118	RNASET2andRPS6KA2.aAug10,RNASET2andRPS6KA2.bAug10,RNASET2andRPS6KA2.cAug10,RNASET2andRPS6KA2.dAug10,RNASET2andRPS6KA2.eAug10,RNASET2andRPS6KA2.oAug10	uc003qvb.1,uc003qvc.1,uc003qvd.1,uc010kkl.1,uc011ego.1	1.39312	0.0496736
6:47200730:+,6:47202406:+	1.44909	1.57651	6.39136	6.22185e-08	1.6017e-06	8.01171	TNFRSF21	core	NM_014452	ENST00000296861,ENST00000419206	TNFRSF21.aAug10,TNFRSF21.bAug10	uc003oyv.2	1.45888	-0.00979878
8:95906347:+,8:95906436:+	1.05084	1.54359	6.38964	6.25962e-08	1.61018e-06	8.13746	CCNE2	core	NM_057749	ENST00000308108,ENST00000396133,ENST00000517487,ENST00000519889,ENST00000520509,ENST00000521809,ENST00000542725	CCNE2.aAug10,CCNE2.bAug10,CCNE2.cAug10,CCNE2.gAug10,CCNE2.hAug10,CCNE2.iAug10	uc003yhc.2,uc003yhd.2	0.807483	0.243354
11:93886796:+,11:93911535:+	1.08233	2.36734	6.38529	6.35682e-08	1.631e-06	8.12257	PANX1	core	NM_015368	ENST00000227638,ENST00000436171	PANX1.aAug10,PANX1.bAug10	uc001peq.2,uc001per.2	0.830677	0.251649
7:111448935:+,7:111449357:+	1.6871	0.63364	6.38519	6.35899e-08	1.63107e-06	7.81917	DOCK4	core	NM_014705	ENST00000342288,ENST00000352877,ENST00000423057,ENST00000428084,ENST00000437633,ENST00000445943,ENST00000469898,ENST00000544250	DOCK4.aAug10,DOCK4.bAug10,DOCK4.cAug10	uc003vfw.2,uc003vfx.2,uc003vfy.2	1.92237	-0.23527
12:19473558:+,12:19475244:+	1.3303	1.42956	6.3842	6.38137e-08	1.63563e-06	8.04543	PLEKHA5	core	NM_001143821,NM_019012	ENST00000299275,ENST00000317589,ENST00000355397,ENST00000359180,ENST00000424268,ENST00000429027,ENST00000536974,ENST00000538068,ENST00000538714,ENST00000539256,ENST00000542828,ENST00000543806	PLEKHA5.aAug10,PLEKHA5.bAug10,PLEKHA5.cAug10,PLEKHA5.dAug10,PLEKHA5.eAug10,PLEKHA5.fAug10,PLEKHA5.gAug10,PLEKHA5.hAug10,PLEKHA5.jAug10	uc001rea.2,uc001reb.2,uc001rec.1,uc009zin.2,uc010sie.1,uc010sif.1,uc010sig.1,uc010sih.1	1.25147	0.0788312
21:19167587:+,21:19168899:+	1.13303	2.03381	6.38014	6.47368e-08	1.65717e-06	8.10231	C21orf91	core	NM_001100420,NM_017447	ENST00000284881,ENST00000400559,ENST00000405964	C21orf91.aAug10,C21orf91.bAug10	uc002yko.3,uc002ykq.3	1.41769	-0.284653
2:202251207:+,2:202252426:+	1.06283	2.09	6.37583	6.57309e-08	1.67833e-06	8.08641	TRAK2	core	NM_015049	ENST00000332624,ENST00000542292	TRAK2andALS2CR12.aAug10	uc002uyb.3	1.09976	-0.0369304
2:91825059:+,2:91843394:+	1.72872	0.506433	6.37462	6.60129e-08	1.6851e-06	7.74786	LOC654342	extended	None	None	LOC654342.lAug10	None	1.63889	0.0898317
10:121199280:+,10:121201511:+	2.03935	0.228249	6.36162	6.91177e-08	1.75408e-06	7.42742	GRK5	core	NM_005308	ENST00000369108,ENST00000392870	GRK5.aAug10,GRK5.bAug10	uc001led.2	1.59445	0.444903
12:77252808:+,12:77253327:+	1.22076	1.10803	6.3591	6.9735e-08	1.76617e-06	8.00347	CSRP2	core	NM_001321	ENST00000311083,ENST00000546966,ENST00000548783,ENST00000552330	CSRP2.aAug10,CSRP2.bAug10,CSRP2.cAug10,CSRP2.hAug10	uc001syl.1	1.16966	0.0511078
8:32616954:+,8:32617718:+	1.51083	0.865646	6.35358	7.11101e-08	1.79918e-06	7.86295	NRG1	core	NM_001159995,NM_001159996,NM_001159999,NM_001160001,NM_001160004,NM_001160008,NM_013956,NM_013957,NM_013960,NM_013964	ENST00000287840,ENST00000287842,ENST00000287845,ENST00000338921,ENST00000341377,ENST00000356819,ENST00000405005,ENST00000518104,ENST00000519301,ENST00000521670,ENST00000523079,ENST00000523534,ENST00000539990	NRG1.aAug10,NRG1.bAug10,NRG1.cAug10,NRG1.dAug10,NRG1.eAug10,NRG1.fAug10,NRG1.gAug10,NRG1.hAug10,NRG1.iAug10,NRG1.jAug10,NRG1.kAug10,NRG1.pAug10,NRG1.rAug10,NRG1.vcAug10	uc003xit.2,uc003xiu.2,uc003xiv.2,uc003xiw.2,uc003xja.2,uc010lvo.2,uc010lvp.2,uc010lvq.2,uc010lvr.2,uc010lvs.2,uc011lbf.1,uc011lbg.1,uc011lbh.1	1.1776	0.33323
2:197028151:+,2:197036057:+	1.26524	1.22165	6.34622	7.29852e-08	1.84093e-06	7.94636	STK17B	core	NM_004226	ENST00000263955	STK17B.bAug10	uc002utk.2	1.15512	0.110124
2:220380028:+,2:220396480:+	1.83978	0.8635	6.34501	7.32985e-08	1.84709e-06	7.54834	ACCN4	core	NM_018674,NM_182847	ENST00000347842,ENST00000358078,ENST00000461395	ACCN4.aAug10,ACCN4.bAug10,ACCN4.cAug10,ACCN4.dAug10,ACCN4.eAug10	uc002vly.1,uc002vlz.2,uc002vma.2,uc010fwi.1,uc010fwj.1	1.73459	0.10519
22:25851807:+,22:25853226:+	1.01555	2.18733	6.33581	7.57226e-08	1.90101e-06	7.95563	CRYBB2P1	core	NR_033733,NR_033734	ENST00000354451,ENST00000382734,ENST00000415709,ENST00000509460	CRYBB2P1andADRBK2.jAug10,CRYBB2P1andADRBK2.vbAug10,CRYBB2P1andADRBK2.vdAug10,CRYBB2P1andADRBK2.veAug10,CRYBB2P1andADRBK2.vfAug10,CRYBB2P1andADRBK2.vgAug10,CRYBB2P1andADRBK2.vhAug10,CRYBB2P1andADRBK2.viAug10	uc003abt.2,uc003abu.2,uc003abv.2	1.0795	-0.0639486
6:166844099:+,6:166845889:+	1.40702	1.42306	6.33418	7.61584e-08	1.91147e-06	7.84059	RPS6KA2	core	NM_001006932,NM_021135	ENST00000265678,ENST00000405189,ENST00000481261,ENST00000503859,ENST00000510118	RNASET2andRPS6KA2.aAug10,RNASET2andRPS6KA2.bAug10,RNASET2andRPS6KA2.cAug10,RNASET2andRPS6KA2.dAug10,RNASET2andRPS6KA2.eAug10	uc003qvb.1,uc003qvc.1,uc003qvd.1,uc010kkl.1,uc011ego.1	1.39312	0.0138992
6:166923845:+,6:166944720:+	1.33548	1.77982	6.3329	7.65039e-08	1.91898e-06	7.89783	RPS6KA2	core	NM_001006932,NM_021135	ENST00000265678,ENST00000366863,ENST00000405189,ENST00000481261,ENST00000503859,ENST00000506565,ENST00000507350,ENST00000507371,ENST00000510118,ENST00000511034,ENST00000512860	RNASET2andRPS6KA2.aAug10,RNASET2andRPS6KA2.bAug10,RNASET2andRPS6KA2.cAug10,RNASET2andRPS6KA2.dAug10,RNASET2andRPS6KA2.eAug10,RNASET2andRPS6KA2.jAug10,RNASET2andRPS6KA2.vvAug10	uc003qvb.1,uc003qvc.1,uc003qvd.1,uc010kkl.1,uc011ego.1	1.39312	-0.0576362
5:24505357:+,5:24509675:+	1.86254	0.434856	6.32815	7.78014e-08	1.94589e-06	7.52745	CDH10	core	NM_006727	ENST00000264463	CDH10.aAug10	uc003jgr.1	1.50966	0.352876
14:24686429:+,14:24687265:+	1.43159	1.44822	6.31981	8.01286e-08	1.99712e-06	7.80935	NEDD8	extended	None	ENST00000396828	NEDD8_.wkAug10	uc001wno.2	-0.0593726	1.49096
6:166944801:+,6:166952156:+	1.23112	1.86103	6.31922	8.02962e-08	2.0008e-06	7.87094	RPS6KA2	core	NM_001006932,NM_021135	ENST00000265678,ENST00000366863,ENST00000405189,ENST00000481261,ENST00000503859,ENST00000506565,ENST00000507350,ENST00000507371,ENST00000510118,ENST00000511034,ENST00000512860	RNASET2andRPS6KA2.aAug10,RNASET2andRPS6KA2.bAug10,RNASET2andRPS6KA2.cAug10,RNASET2andRPS6KA2.dAug10,RNASET2andRPS6KA2.eAug10,RNASET2andRPS6KA2.jAug10,RNASET2andRPS6KA2.vvAug10	uc003qvb.1,uc003qvc.1,uc003qvd.1,uc010kkl.1,uc011ego.1	1.39312	-0.162004
21:34841233:+,21:34852145:+	1.00214	2.61648	6.31483	8.15507e-08	2.02803e-06	7.88335	TMEM50B	core	NM_006134,NR_040016	ENST00000420455,ENST00000440644,ENST00000442441,ENST00000459909,ENST00000542230	TMEM50B.bAug10,TMEM50B.cAug10,TMEM50B.eAug10,TMEM50B.fAug10	uc002yrs.1,uc002yrt.1,uc010gmb.1	0.841229	0.160908
3:64617226:+,3:64617484:+	1.36015	1.0275	6.31269	8.21706e-08	2.04047e-06	7.80023	ADAMTS9	core	NM_182920	ENST00000295903,ENST00000475557,ENST00000482490,ENST00000498707	ADAMTS9.aAug10,ADAMTS9.bAug10,ADAMTS9.cAug10,ADAMTS9.dAug10	uc003dmg.2,uc003dmh.1,uc003dmk.1,uc011bfo.1	0.901905	0.458244
X:131525111:+,X:131526171:+	1.85896	0.519315	6.31115	8.26199e-08	2.04852e-06	7.45968	MBNL3	core	NM_001170701,NM_001170702,NM_001170703,NM_001170704,NM_018388,NM_133486	ENST00000370839,ENST00000370844,ENST00000370849,ENST00000370853,ENST00000370857,ENST00000394311,ENST00000421707,ENST00000436215,ENST00000473364,ENST00000538204	MBNL3.aAug10,MBNL3.bAug10,MBNL3.cAug10,MBNL3.dAug10,MBNL3.eAug10,MBNL3.fAug10,MBNL3.gAug10,MBNL3.hAug10,MBNL3.iAug10,MBNL3.jAug10	uc004ews.2,uc004ewt.2,uc004ewu.3,uc004ewv.3,uc004eww.2,uc004ewx.1,uc011muz.1	1.56261	0.296351
11:47196864:+,11:47197402:+	1.30998	1.63195	6.30539	8.43176e-08	2.08545e-06	7.78893	ARFGAP2	core	NM_001242832,NM_032389	ENST00000395449,ENST00000419701,ENST00000524727,ENST00000524782,ENST00000525314,ENST00000525398,ENST00000527097,ENST00000528444,ENST00000528708,ENST00000529439,ENST00000529455,ENST00000529599,ENST00000530794,ENST00000531750,ENST00000532478,ENST00000533939	PACSIN3andARFGAP2.aAug10,PACSIN3andARFGAP2.bAug10,PACSIN3andARFGAP2.dAug10,PACSIN3andARFGAP2.iAug10,PACSIN3andARFGAP2.jAug10,PACSIN3andARFGAP2.lAug10,PACSIN3andARFGAP2.mAug10,PACSIN3andARFGAP2.oAug10,PACSIN3andARFGAP2.pAug10,PACSIN3andARFGAP2.rAug10,PACSIN3andARFGAP2.tAug10,PACSIN3andARFGAP2.uAug10,PACSIN3andARFGAP2.vaAug10,PACSIN3andARFGAP2.veAug10,PACSIN3andARFGAP2.vfAug10,PACSIN3andARFGAP2.vhA…	uc001ndt.2,uc010rhb.1,uc010rhd.1	0.952578	0.357405
4:167983688:+,4:167983793:+	1.53013	0.423109	6.30532	8.43388e-08	2.08546e-06	7.68894	SPOCK3	core	NM_016950	ENST00000502330,ENST00000502741,ENST00000511531,ENST00000512042	None	uc003iri.1,uc011cjw.1	1.01038	0.519755
22:18189591:+,22:18209443:+	3.01288	-0.525873	6.29103	8.87082e-08	2.17836e-06	6.1756	BCL2L13	extended	None	ENST00000485631	BCL2L13.cAug10	uc002zna.2	0.0641184	2.94877
11:77931490:+,11:77932723:+	1.09298	1.99192	6.29054	8.88612e-08	2.18115e-06	7.80339	GAB2	core	NM_012296,NM_080491	ENST00000340149,ENST00000361507	GAB2.aAug10,GAB2.bAug10	uc001ozg.2,uc001ozh.2	0.871042	0.221938
16:65025838:+,16:65026818:+	1.27209	1.3596	6.28784	8.97145e-08	2.19958e-06	7.74125	CDH11	core	NM_001797	ENST00000268603,ENST00000394156,ENST00000538390	CDH11.aAug10,CDH11.bAug10,CDH11.dAug10	uc002eoi.2,uc002eoj.2,uc010cdn.2,uc010vin.1	1.22347	0.048621
5:161309707:+,5:161317904:+	1.79445	0.111368	6.28681	9.00417e-08	2.20634e-06	7.4249	GABRA1	core	NM_000806,NM_001127643,NM_001127644,NM_001127645,NM_001127646,NM_001127647,NM_001127648	ENST00000023897,ENST00000393943,ENST00000420560,ENST00000428797,ENST00000437025,ENST00000444819,ENST00000519542	GABRA1.aAug10,GABRA1.bAug10,GABRA1.cAug10,GABRA1.dAug10,GABRA1.eAug10,GABRA1.fAug10,GABRA1.gAug10,GABRA1.iAug10	uc003lyx.3,uc010jiw.2,uc010jix.2,uc010jiy.2,uc010jiz.2,uc010jja.2,uc010jjb.2	1.9971	-0.202652
16:65022247:+,16:65025671:+	1.25326	1.52598	6.27737	9.30946e-08	2.27281e-06	7.72088	CDH11	core	NM_001797	ENST00000268603,ENST00000394156,ENST00000538390	CDH11.aAug10,CDH11.bAug10	uc002eoi.2,uc002eoj.2,uc010cdn.2,uc010vin.1	1.22347	0.0297907
2:149793902:+,2:149798124:+	1.15585	2.23815	6.26744	9.64207e-08	2.3483e-06	7.71643	KIF5C	core	NM_004522	ENST00000334436,ENST00000414838,ENST00000435030	KIF5C.aAug10	uc010zbu.1	1.0984	0.0574502
X:131526362:+,X:131540256:+	1.85367	0.466619	6.26201	9.82855e-08	2.38896e-06	7.33179	MBNL3	core	NM_001170701,NM_001170702,NM_001170703,NM_001170704,NM_018388,NM_133486	ENST00000370839,ENST00000370844,ENST00000370849,ENST00000370853,ENST00000370857,ENST00000394311,ENST00000421707,ENST00000436215,ENST00000473364,ENST00000538204	MBNL3.aAug10,MBNL3.bAug10,MBNL3.cAug10,MBNL3.dAug10,MBNL3.eAug10,MBNL3.fAug10,MBNL3.gAug10,MBNL3.hAug10,MBNL3.iAug10,MBNL3.jAug10	uc004ews.2,uc004ewt.2,uc004ewu.3,uc004ewv.3,uc004eww.2,uc004ewx.1,uc011muz.1	1.56261	0.291057
4:70897716:+,4:70897795:+	4.60335	-1.54299	6.2617	9.83945e-08	2.39056e-06	3.54351	HTN3	core	NM_000200	ENST00000526767,ENST00000530128	STATHandHTN3andHTN1.dAug10,STATHandHTN3andHTN1.qAug10,STATHandHTN3andHTN1.vbAug10,STATHandHTN3andHTN1.vfAug10	uc003hew.2	4.49792	0.105429
12:19489550:+,12:19496257:+	1.2214	1.63279	6.25913	9.9291e-08	2.40942e-06	7.67082	PLEKHA5	core	NM_001143821,NM_019012	ENST00000299275,ENST00000317589,ENST00000355397,ENST00000359180,ENST00000424268,ENST00000429027,ENST00000536974,ENST00000538068,ENST00000538714,ENST00000538972,ENST00000539256,ENST00000542828,ENST00000543806	PLEKHA5.aAug10,PLEKHA5.bAug10,PLEKHA5.cAug10,PLEKHA5.dAug10,PLEKHA5.eAug10,PLEKHA5.fAug10,PLEKHA5.gAug10,PLEKHA5.hAug10,PLEKHA5.jAug10	uc001rea.2,uc001reb.2,uc001rec.1,uc009zin.2,uc009zio.2,uc010sie.1,uc010sif.1,uc010sig.1,uc010sih.1	1.25147	-0.0300692
2:112870506:+,2:112873661:+	2.16573	0.621821	6.25307	1.01441e-07	2.45447e-06	6.90757	TMEM87B	core	NM_032824	ENST00000283206	TMEM87B.aAug10	uc002thm.2	1.73822	0.42751
2:91825059:+,2:91842946:+	2.508	-0.251485	6.24672	1.03742e-07	2.50169e-06	6.48232	LOC654342	core	NR_027238	ENST00000271699	LOC654342.eAug10	uc010yub.1	1.63889	0.869109
12:19514640:+,12:19518898:+	1.19759	1.67115	6.24318	1.05046e-07	2.53032e-06	7.62601	PLEKHA5	core	NM_001143821,NM_019012	ENST00000299275,ENST00000317589,ENST00000355397,ENST00000359180,ENST00000424268,ENST00000429027,ENST00000538714,ENST00000538972,ENST00000539256,ENST00000542828,ENST00000543806	PLEKHA5.aAug10,PLEKHA5.bAug10,PLEKHA5.cAug10,PLEKHA5.dAug10,PLEKHA5.eAug10,PLEKHA5.gAug10,PLEKHA5.jAug10	uc001rea.2,uc001reb.2,uc009zin.2,uc009zio.2,uc010sif.1,uc010sig.1	1.25147	-0.0538778
4:159590920:+,4:159592768:+	1.16526	1.64106	6.23875	1.06703e-07	2.56629e-06	7.61909	C4orf46	core	NM_001008393	ENST00000379205	C4orf46.bAug10	uc003iqa.2	1.16911	-0.00385578
6:166914412:+,6:166917994:+	1.21635	1.95602	6.23822	1.06903e-07	2.57049e-06	7.60859	RPS6KA2	core	NM_001006932,NM_021135	ENST00000265678,ENST00000366863,ENST00000366865,ENST00000405189,ENST00000481261,ENST00000503859,ENST00000507350,ENST00000510118	RNASET2andRPS6KA2.aAug10,RNASET2andRPS6KA2.bAug10,RNASET2andRPS6KA2.cAug10,RNASET2andRPS6KA2.dAug10,RNASET2andRPS6KA2.eAug10,RNASET2andRPS6KA2.jAug10	uc003qvb.1,uc003qvc.1,uc003qvd.1,uc010kkl.1,uc011ego.1	1.39312	-0.176765
X:153138152:+,X:153138683:+	1.20928	1.24953	6.23762	1.07132e-07	2.57415e-06	7.61486	L1CAM	core	NM_000425,NM_024003	ENST00000361699,ENST00000370057,ENST00000370060,ENST00000439496,ENST00000458029,ENST00000464967	NAA10andARHGAP4andL1CAM.aAug10,NAA10andARHGAP4andL1CAM.bAug10,NAA10andARHGAP4andL1CAM.vlAug10	uc004fjb.2,uc004fjc.2	0.390735	0.818544
1:102302581:+,1:102312401:+	1.32804	0.778314	6.23624	1.07654e-07	2.58484e-06	7.57368	OLFM3	extended	None	ENST00000338858,ENST00000359814,ENST00000465523	OLFM3.aAug10,OLFM3.dAug10	uc001due.2,uc001duf.2	0.835972	0.492067
7:111484953:+,7:111487055:+	2.74585	-0.112057	6.23046	1.09877e-07	2.63252e-06	6.41623	DOCK4	core	NM_014705	ENST00000342288,ENST00000352877,ENST00000423057,ENST00000428084,ENST00000437633,ENST00000445943,ENST00000544250	DOCK4.aAug10,DOCK4.bAug10,DOCK4.cAug10	uc003vfw.2,uc003vfx.2,uc003vfy.2	1.92237	0.823474
17:40635149:+,17:40639173:+	1.14164	1.89251	6.22323	1.12715e-07	2.69045e-06	7.56794	ATP6V0A1	core	NM_001130020,NM_001130021,NM_005177	ENST00000264649,ENST00000343619,ENST00000393829,ENST00000537728,ENST00000546249	ATP6V0A1.aAug10,ATP6V0A1.bAug10,ATP6V0A1.cAug10,ATP6V0A1.dAug10,ATP6V0A1.eAug10,ATP6V0A1.fAug10,ATP6V0A1.hAug10,ATP6V0A1.iAug10,ATP6V0A1.oAug10,ATP6V0A1.vaAug10	uc002hzq.2,uc002hzr.2,uc002hzs.2,uc010wgj.1,uc010wgk.1,uc010wgl.1	0.961028	0.180617
2:202262303:+,2:202262868:+	1.05732	1.97114	6.2202	1.13931e-07	2.71409e-06	7.56583	TRAK2	core	NM_015049	ENST00000332624,ENST00000430254,ENST00000542292	TRAK2andALS2CR12.aAug10,TRAK2andALS2CR12.fAug10	uc002uyb.3,uc002uyc.2	1.09976	-0.0424405
6:166826375:+,6:166827282:+	1.60523	1.1185	6.21707	1.15194e-07	2.73832e-06	7.32831	RPS6KA2	core	NM_001006932,NM_021135	ENST00000265678,ENST00000405189,ENST00000481261,ENST00000503859,ENST00000509742,ENST00000510118	RNASET2andRPS6KA2.aAug10,RNASET2andRPS6KA2.bAug10,RNASET2andRPS6KA2.cAug10,RNASET2andRPS6KA2.dAug10,RNASET2andRPS6KA2.eAug10,RNASET2andRPS6KA2.sAug10,RNASET2andRPS6KA2.vhAug10	uc003qvb.1,uc003qvc.1,uc003qvd.1,uc010kkk.1,uc010kkl.1,uc011ego.1	1.39312	0.212115
8:23709897:+,8:23711919:+	1.45884	0.431327	6.21214	1.17218e-07	2.77984e-06	7.42871	STC1	core	NM_003155	ENST00000290271,ENST00000540277	STC1.aAug10	uc003xdw.1	1.41358	0.0452563
4:70920059:+,4:70920138:+	4.80455	-1.83458	6.21188	1.17328e-07	2.78179e-06	3.42379	HTN1	core	NM_002159	ENST00000246896,ENST00000511674	STATHandHTN3andHTN1.cAug10,STATHandHTN3andHTN1.gAug10,STATHandHTN3andHTN1.iAug10	uc003hex.2	4.86394	-0.0593907
15:74276471:+,15:74277000:+	1.73895	0.772526	6.21075	1.17797e-07	2.79225e-06	7.17812	STOML1	core	NM_004809	ENST00000316900,ENST00000316911,ENST00000541638	STOML1.aAug10,STOML1.bAug10,STOML1.cAug10,STOML1.dAug10,STOML1.eAug10,STOML1.gAug10,STOML1.nAug10	uc002awe.2,uc002awf.2,uc002awg.2,uc002awh.2,uc002awi.2,uc010uld.1	1.39639	0.342565
12:19475324:+,12:19475452:+	1.40806	1.24879	6.2002	1.22268e-07	2.87984e-06	7.39369	PLEKHA5	core	NM_001143821,NM_019012	ENST00000299275,ENST00000317589,ENST00000355397,ENST00000359180,ENST00000424268,ENST00000429027,ENST00000536974,ENST00000538068,ENST00000538714,ENST00000539256,ENST00000542828,ENST00000543806	PLEKHA5.aAug10,PLEKHA5.bAug10,PLEKHA5.cAug10,PLEKHA5.dAug10,PLEKHA5.eAug10,PLEKHA5.fAug10,PLEKHA5.gAug10,PLEKHA5.hAug10,PLEKHA5.jAug10	uc001rea.2,uc001reb.2,uc001rec.1,uc009zin.2,uc010sie.1,uc010sif.1,uc010sig.1,uc010sih.1	1.25147	0.156587
11:21135260:+,11:21250878:+	1.66482	0.0569949	6.19839	1.23052e-07	2.89558e-06	7.20406	NELL1	core	NM_006157,NM_201551	ENST00000298925,ENST00000325319,ENST00000357134,ENST00000530672,ENST00000532434	NELL1.aAug10,NELL1.bAug10,NELL1.cAug10,NELL1.dAug10	uc001mqe.2,uc001mqf.2,uc009yid.2,uc010rdo.1,uc010rdp.1	1.41287	0.251954
9:120053792:+,9:120176775:+	1.05733	2.19356	6.19412	1.2492e-07	2.93472e-06	7.47895	ASTN2	core	NM_014010	ENST00000313400,ENST00000361209,ENST00000361477,ENST00000373996	ASTN2.aAug10	uc004bjr.1,uc004bjs.1,uc004bjt.1	0.64723	0.410099
X:102585232:+,X:102585905:+	1.71402	0.720714	6.19284	1.25484e-07	2.94591e-06	7.15921	TCEAL7	extended	None	ENST00000372666	TCEAL7.bAug10	None	1.11379	0.60023
8:32614047:+,8:32616824:+	1.67364	0.533182	6.19173	1.25981e-07	2.95479e-06	7.18986	NRG1	core	NM_001159995,NM_001159996,NM_001159999,NM_001160001,NM_001160004,NM_001160008,NM_013956,NM_013957,NM_013960,NM_013964	ENST00000287840,ENST00000287842,ENST00000287845,ENST00000338921,ENST00000341377,ENST00000356819,ENST00000405005,ENST00000518104,ENST00000519301,ENST00000521670,ENST00000523079,ENST00000523534,ENST00000539990	NRG1.aAug10,NRG1.bAug10,NRG1.cAug10,NRG1.dAug10,NRG1.eAug10,NRG1.fAug10,NRG1.gAug10,NRG1.hAug10,NRG1.iAug10,NRG1.jAug10,NRG1.kAug10,NRG1.pAug10,NRG1.rAug10,NRG1.vcAug10	uc003xit.2,uc003xiu.2,uc003xiv.2,uc003xiw.2,uc003xja.2,uc010lvo.2,uc010lvp.2,uc010lvq.2,uc010lvr.2,uc010lvs.2,uc011lbf.1,uc011lbg.1,uc011lbh.1	1.1776	0.496034
16:1797276:+,16:1798245:+	1.36555	1.62777	6.18887	1.27258e-07	2.97988e-06	7.41014	MAPK8IP3	core	NM_001040439,NM_015133	ENST00000250894,ENST00000356010	MAPK8IP3.aAug10,MAPK8IP3.bAug10,MAPK8IP3.cAug10,MAPK8IP3.eAug10,MAPK8IP3.hAug10,MAPK8IP3.iAug10	uc002cmk.2,uc002cml.2,uc010uvl.1	1.14252	0.223035
3:3095659:+,3:3097804:+	1.63925	0.63073	6.18651	1.2832e-07	2.99984e-06	7.17534	CNTN4	core	NM_001206955,NM_001206956,NM_175607,NM_175613	ENST00000358480,ENST00000397459,ENST00000397461,ENST00000418658,ENST00000427331,ENST00000448906,ENST00000484686	CNTN4.aAug10,CNTN4.bAug10,CNTN4.dAug10,CNTN4.eAug10,CNTN4.gAug10	uc003bpc.2,uc003bpe.2,uc003bpf.2,uc003bpg.2	1.06573	0.573522
3:112068666:+,3:112080390:+	1.0461	1.89012	6.17751	1.32463e-07	3.08949e-06	7.42333	CD200	core	NM_001004196,NM_005944	ENST00000315711,ENST00000383681,ENST00000473539,ENST00000478595	CD200.aAug10,CD200.bAug10,CD200.cAug10,CD200.eAug10,CD200.gAug10,CD200.iAug10,CD200.lAug10,CD200.mAug10,CD200.oAug10	uc003dyw.2,uc003dyx.2,uc003dyy.2,uc003dyz.2	1.16118	-0.115076
4:119754892:+,4:119757096:+	1.2037	1.48084	6.17543	1.33442e-07	3.10871e-06	7.39189	SEC24D	core	NM_014822	ENST00000280551,ENST00000379735	SEC24D.aAug10,SEC24D.bAug10,SEC24D.cAug10,SEC24D.iAug10	uc003ici.3,uc003icj.3	1.08439	0.119309
6:4844737:+,6:4891947:+	1.05052	1.77094	6.17494	1.3367e-07	3.11323e-06	7.41456	CDYL	extended	None	None	CDYL.lAug10	None	0.297471	0.75305
11:47193108:+,11:47193215:+	1.09855	1.99608	6.16816	1.36907e-07	3.17762e-06	7.38971	ARFGAP2	core	NM_001242832,NM_032389	ENST00000319543,ENST00000395449,ENST00000419701,ENST00000426335,ENST00000524782,ENST00000525398,ENST00000526948,ENST00000527927,ENST00000529455,ENST00000532438,ENST00000532478,ENST00000533243	PACSIN3andARFGAP2.aAug10,PACSIN3andARFGAP2.bAug10,PACSIN3andARFGAP2.cAug10,PACSIN3andARFGAP2.dAug10,PACSIN3andARFGAP2.hAug10,PACSIN3andARFGAP2.iAug10,PACSIN3andARFGAP2.jAug10,PACSIN3andARFGAP2.lAug10,PACSIN3andARFGAP2.mAug10,PACSIN3andARFGAP2.tAug10,PACSIN3andARFGAP2.vfAug10,PACSIN3andARFGAP2.viAug10,PACSIN3andARFGAP2.vmAug10,PACSIN3andARFGAP2.vwAug10	uc001ndt.2,uc001ndu.2,uc010rha.1,uc010rhb.1,uc010rhc.1	0.952578	0.145968
11:77938097:+,11:77961203:+	1.04154	1.95668	6.16612	1.37896e-07	3.1976e-06	7.38519	GAB2	core	NM_012296,NM_080491	ENST00000340149,ENST00000361507	GAB2.aAug10,GAB2.bAug10	uc001ozg.2,uc001ozh.2	0.871042	0.170496
3:186769134:+,3:186790637:+	1.38413	1.51747	6.16357	1.39145e-07	3.22358e-06	7.30552	ST6GAL1	core	NM_003032,NM_173216,NM_173217	ENST00000169298,ENST00000427315,ENST00000442023,ENST00000448044,ENST00000455441,ENST00000457772	ST6GAL1.aAug10,ST6GAL1.bAug10,ST6GAL1.cAug10,ST6GAL1.dAug10,ST6GAL1.eAug10,ST6GAL1.hAug10,ST6GAL1.iAug10,ST6GAL1.mAug10,ST6GAL1.tAug10	uc003frb.2,uc003frc.2,uc003frd.2	1.40289	-0.0187568
3:33626412:+,3:33633887:+	1.23962	1.82619	6.15941	1.41204e-07	3.2645e-06	7.34195	CLASP2	core	NM_001207044,NM_015097	ENST00000307312,ENST00000359576,ENST00000399362,ENST00000461133,ENST00000468888,ENST00000480013	CLASP2.aAug10,CLASP2.bAug10,CLASP2.cAug10,CLASP2.lAug10,CLASP2.mAug10	uc003cft.2,uc003cfu.2,uc010hgb.2	0.672544	0.567075
12:19406957:+,12:19407979:+	1.29309	1.58574	6.15899	1.41411e-07	3.2671e-06	7.30445	PLEKHA5	core	NM_001143821,NM_019012	ENST00000299275,ENST00000309364,ENST00000317589,ENST00000355397,ENST00000359180,ENST00000412219,ENST00000424268,ENST00000429027,ENST00000536974,ENST00000538034,ENST00000538305,ENST00000538714,ENST00000539256,ENST00000542828,ENST00000543806	PLEKHA5.aAug10,PLEKHA5.bAug10,PLEKHA5.cAug10,PLEKHA5.dAug10,PLEKHA5.eAug10,PLEKHA5.fAug10,PLEKHA5.gAug10,PLEKHA5.iAug10,PLEKHA5.mAug10	uc001rea.2,uc001reb.2,uc009zin.2,uc010sie.1,uc010sif.1,uc010sig.1,uc010sih.1	1.25147	0.0416209
7:1197893:+,7:1199600:+	1.51118	1.04856	6.15893	1.41442e-07	3.2671e-06	7.20713	ZFAND2A	core	NM_182491	ENST00000316495,ENST00000397083,ENST00000401903,ENST00000484977	ZFAND2A.aAug10,ZFAND2A.bAug10,ZFAND2A.cAug10,ZFAND2A.eAug10,ZFAND2A.gAug10	uc003skc.2,uc003skd.3	1.29269	0.218493
15:86284726:+,15:86286723:+	1.34788	1.01839	6.13568	1.53536e-07	3.50914e-06	7.21298	AKAP13	core	NM_006738,NM_007200,NM_144767	ENST00000361243,ENST00000394510,ENST00000394516,ENST00000394518,ENST00000426424,ENST00000452008,ENST00000458540,ENST00000560579	AKAP13.aAug10,AKAP13.bAug10,AKAP13.cAug10,AKAP13.dAug10,AKAP13.eAug10,AKAP13.fAug10	uc002blu.1,uc002blv.1,uc002blw.1,uc002blx.1	0.452201	0.895682
12:77253420:+,12:77254064:+	1.10833	1.17944	6.13122	1.55972e-07	3.55833e-06	7.26136	CSRP2	core	NM_001321	ENST00000311083,ENST00000546966,ENST00000547435,ENST00000548783,ENST00000552330	CSRP2.aAug10,CSRP2.bAug10,CSRP2.cAug10,CSRP2.dAug10,CSRP2.hAug10	uc001syl.1	1.16966	-0.0613294
13:36045697:+,13:36046537:+	1.44227	0.925891	6.11971	1.62436e-07	3.68899e-06	7.09777	NBEA	extended	None	ENST00000543274	NBEA.dAug10	uc010tee.1	0.799454	0.642815
20:17937681:+,20:17941783:+	1.07125	1.40933	6.11457	1.65405e-07	3.74963e-06	7.21024	SNX5	extended	None	ENST00000475716,ENST00000483485	OVOL2andSNX5andSNORD17.eAug10,OVOL2andSNX5andSNORD17.mAug10,OVOL2andSNX5andSNORD17.oAug10	uc002wqb.2	-0.450328	1.52158
12:19512480:+,12:19514516:+	1.40184	1.40368	6.11443	1.65489e-07	3.75068e-06	7.15132	PLEKHA5	core	NM_001143821,NM_019012	ENST00000299275,ENST00000317589,ENST00000355397,ENST00000359180,ENST00000424268,ENST00000429027,ENST00000536974,ENST00000538714,ENST00000538972,ENST00000539256,ENST00000542828,ENST00000543806	PLEKHA5.aAug10,PLEKHA5.bAug10,PLEKHA5.cAug10,PLEKHA5.dAug10,PLEKHA5.eAug10,PLEKHA5.fAug10,PLEKHA5.gAug10,PLEKHA5.hAug10,PLEKHA5.jAug10	uc001rea.2,uc001reb.2,uc001rec.1,uc009zin.2,uc009zio.2,uc010sie.1,uc010sif.1,uc010sig.1,uc010sih.1	1.25147	0.150372
2:197010779:+,2:197021163:+	1.06718	1.78152	6.11339	1.66094e-07	3.7627e-06	7.20843	STK17B	core	NM_004226	ENST00000263955,ENST00000409228	STK17B.aAug10,STK17B.bAug10	uc002utk.2,uc010fsh.2	1.15512	-0.0879316
1:12058935:+,1:12059045:+	1.15405	1.96321	6.11125	1.67352e-07	3.78863e-06	7.18605	MFN2	core	NM_001127660,NM_014874	ENST00000235329,ENST00000444836	MFN2.aAug10,MFN2.bAug10,MFN2.hAug10	uc001atn.3,uc009vni.2	0.915216	0.238838
21:22656720:+,21:22658589:+	1.03608	2.05136	6.11102	1.67493e-07	3.79097e-06	7.20049	NCAM2	core	NM_004540	ENST00000400546,ENST00000486367,ENST00000535285	NCAM2.aAug10,NCAM2.cAug10,NCAM2.dAug10,NCAM2.eAug10,NCAM2.gAug10,NCAM2.lAug10	uc002yld.1,uc011acc.1	0.850367	0.185712
11:68580044:+,11:68582802:+	1.0726	1.98747	6.11003	1.68075e-07	3.8007e-06	7.19505	CPT1A	core	NM_001031847,NM_001876	ENST00000265641,ENST00000376618,ENST00000538308,ENST00000539743,ENST00000540367	CPT1A.aAug10,CPT1A.bAug10,CPT1A.cAug10,CPT1A.dAug10	uc001oof.3,uc001oog.3,uc009ysj.2	0.609328	0.46327
19:4362382:+,19:4362609:+	1.05806	2.09278	6.10379	1.71815e-07	3.87827e-06	7.1758	SH3GL1	core	NM_001199943,NM_001199944,NM_003025	ENST00000269886,ENST00000417295	SH3GL1.aAug10,SH3GL1.bAug10,SH3GL1.cAug10	uc002maj.2,uc002mak.2,uc010xig.1	0.981822	0.0762425
3:64527646:+,3:64532434:+	1.47186	0.436986	6.10307	1.72255e-07	3.88472e-06	7.04176	ADAMTS9	core	NM_182920	ENST00000295903,ENST00000481060,ENST00000498707	ADAMTS9.aAug10,ADAMTS9.bAug10,ADAMTS9.eAug10	uc003dmg.2,uc011bfo.1,uc011bfp.1	0.901905	0.569956
6:166952272:+,6:167040409:+	1.6892	0.959518	6.1013	1.73332e-07	3.90548e-06	6.8585	RPS6KA2	core	NM_021135	ENST00000265678,ENST00000366863	RNASET2andRPS6KA2.cAug10	uc003qvb.1	1.39312	0.296076
5:24498628:+,5:24505221:+	1.68632	0.754345	6.09901	1.74739e-07	3.93365e-06	6.9475	CDH10	core	NM_006727	ENST00000264463	CDH10.aAug10	uc003jgr.1	1.50966	0.176664
19:39990113:+,19:39991255:+	1.51536	0.903253	6.09691	1.76035e-07	3.9575e-06	6.99903	DLL3	core	NM_016941,NM_203486	ENST00000205143,ENST00000356433	DLL3.aAug10,DLL3.bAug10,DLL3.cAug10,DLL3.dAug10,DLL3.eAug10	uc002olw.2,uc002olx.2,uc010egq.2	0.888058	0.627299
3:129373946:+,3:129389173:+	1.13891	1.65762	6.09235	1.78889e-07	4.01445e-06	7.13218	TMCC1	core	NM_001017395,NM_001128224,NR_033361	ENST00000329333,ENST00000393238,ENST00000426664,ENST00000432054	TMCC1.aAug10,TMCC1.bAug10,TMCC1.cAug10,TMCC1.dAug10,TMCC1.eAug10	uc003emy.3,uc003emz.3,uc010htg.2,uc011blc.1	0.82419	0.314718
11:94823391:+,11:94861541:+	1.51497	1.56155	6.09161	1.7936e-07	4.02231e-06	6.96785	ENDOD1	core	NM_015036	ENST00000278505	ENDOD1.aAug10	uc001pfh.2	1.51856	-0.00358514
2:220397661:+,2:220399893:+	1.98133	0.801717	6.08756	1.81936e-07	4.0733e-06	6.67199	ACCN4	core	NM_018674	ENST00000358078,ENST00000474489	ACCN4.aAug10,ACCN4.fAug10	uc002vlz.2,uc002vmb.2	1.73459	0.246746
14:104201532:+,14:104202340:+	1.03258	2.02208	6.07994	1.8689e-07	4.16417e-06	7.09633	PPP1R13B	core	NM_015316	ENST00000202556,ENST00000423488,ENST00000555391,ENST00000555825,ENST00000556334,ENST00000556597,ENST00000557082	PPP1R13B.aAug10,PPP1R13B.cAug10,PPP1R13B.dAug10,PPP1R13B.eAug10,PPP1R13B.mAug10,PPP1R13B.rAug10	uc001yof.1,uc010awv.1	0.806724	0.225852
3:40442502:+,3:40453303:+	2.06921	-0.557709	6.07878	1.87655e-07	4.17656e-06	6.42748	ENTPD3	core	NM_001248	ENST00000301825,ENST00000445129,ENST00000456402	ENTPD3.aAug10,ENTPD3.bAug10,ENTPD3.cAug10,ENTPD3.dAug10	uc003ckd.3,uc010hhy.2	2.10296	-0.0337544
12:51354885:+,12:51364225:+	1.42447	0.340607	6.07175	1.92366e-07	4.27289e-06	6.9433	HIGD1C	core	NM_001109619	ENST00000398455	HIGD1C.aAug10	uc010smw.1	1.54905	-0.124579
6:145093104:+,6:145095426:+	1.14299	1.57481	6.06917	1.94122e-07	4.30998e-06	7.0602	UTRN	core	NM_007124	ENST00000367526,ENST00000367545	UTRN.aAug10	uc003qkt.2	0.847478	0.295512
6:128291425:+,6:128294167:+	1.08181	1.51541	6.06144	1.99485e-07	4.41536e-06	7.03412	PTPRK	core	NM_001135648,NM_002844	ENST00000368207,ENST00000368210,ENST00000368213,ENST00000368215,ENST00000368226,ENST00000368227,ENST00000532331	PTPRK.aAug10,PTPRK.bAug10,PTPRK.cAug10,PTPRK.dAug10	uc003qbj.2,uc003qbk.2,uc010kfc.2,uc011ebu.1	0.555594	0.526211
X:18911456:+,X:18912265:+	1.38931	1.47425	6.05885	2.01318e-07	4.44807e-06	6.92984	LOC100132163,PHKA2	core	NR_029379	ENST00000439295,ENST00000452900	LOC100132163.aAug10,LOC100132163.bAug10	uc004cyt.2	1.39059	-0.00128101
2:149864581:+,2:149866649:+	1.07633	2.30558	6.05564	2.03607e-07	4.4927e-06	7.01482	KIF5C	core	NM_004522	ENST00000334436,ENST00000397413,ENST00000414838,ENST00000435030,ENST00000464066,ENST00000482151	KIF5C.aAug10,KIF5C.bAug10,KIF5C.dAug10,KIF5C.fAug10	uc002tws.1,uc002twu.1,uc010zbu.1	1.0984	-0.022069
11:21594955:+,11:21596518:+	1.33693	0.676632	6.04565	2.10901e-07	4.6292e-06	6.91531	NELL1	core	NM_006157,NM_201551	ENST00000298925,ENST00000325319,ENST00000357134,ENST00000529218,ENST00000532434	NELL1.aAug10,NELL1.bAug10,NELL1.cAug10,NELL1.dAug10,NELL1.eAug10	uc001mqe.2,uc001mqf.2,uc001mqh.2,uc009yid.2,uc010rdo.1,uc010rdp.1	1.41287	-0.0759393
7:16502588:+,7:16505089:+	1.37342	0.558477	6.04383	2.12257e-07	4.65591e-06	6.89118	SOSTDC1	core	NM_015464	ENST00000307068	SOSTDC1andISPD.dAug10	uc003stg.2	1.37257	0.000847346
20:23361954:+,20:23370583:+	1.30504	1.2953	6.04356	2.12461e-07	4.65936e-06	6.91878	NAPB	core	NM_022080	ENST00000377026,ENST00000398425,ENST00000431864,ENST00000432543,ENST00000468128,ENST00000472855	NAPB.aAug10,NAPB.bAug10,NAPB.dAug10,NAPB.eAug10,NAPB.fAug10,NAPB.gAug10,NAPB.hAug10,NAPB.iAug10,NAPB.pAug10,NAPB.sAug10,NAPB.tAug10,NAPB.uAug10,NAPB.vaAug10	uc002wta.2,uc002wtb.2,uc002wtc.2,uc002wtd.3,uc010zss.1,uc010zst.1	1.24026	0.0647825
1:12056375:+,1:12057354:+	1.07861	2.08727	6.0406	2.14687e-07	4.70098e-06	6.96205	MFN2	core	NM_001127660,NM_014874	ENST00000235329,ENST00000444836	MFN2.aAug10,MFN2.bAug10,MFN2.cAug10,MFN2.dAug10,MFN2.eAug10,MFN2.fAug10	uc001atn.3,uc009vni.2	0.915216	0.163394
6:166912138:+,6:166914375:+	1.29504	1.76085	6.03711	2.17348e-07	4.75434e-06	6.91529	RPS6KA2	core	NM_001006932,NM_021135	ENST00000265678,ENST00000366863,ENST00000366865,ENST00000405189,ENST00000481261,ENST00000503859,ENST00000507350,ENST00000510118	RNASET2andRPS6KA2.aAug10,RNASET2andRPS6KA2.bAug10,RNASET2andRPS6KA2.cAug10,RNASET2andRPS6KA2.dAug10,RNASET2andRPS6KA2.eAug10,RNASET2andRPS6KA2.jAug10	uc003qvb.1,uc003qvc.1,uc003qvd.1,uc010kkl.1,uc011ego.1	1.39312	-0.0980761
7:111405278:+,7:111407088:+	1.8385	0.18372	6.03283	2.20646e-07	4.82094e-06	6.56222	DOCK4	core	NM_014705	ENST00000342288,ENST00000352877,ENST00000423057,ENST00000428053,ENST00000428084,ENST00000437129,ENST00000437633,ENST00000445943,ENST00000450156,ENST00000494651	DOCK4.aAug10,DOCK4.bAug10,DOCK4.cAug10,DOCK4.eAug10,DOCK4.fAug10,DOCK4.jAug10,DOCK4.kAug10	uc003vfw.2,uc003vfx.2,uc003vfy.2,uc011kml.1,uc011kmm.1	1.92237	-0.0838711
4:70898970:+,4:70901984:+	4.16785	-1.41996	6.03199	2.21303e-07	4.83212e-06	3.36606	HTN3	core	NM_000200	ENST00000381057,ENST00000526767,ENST00000533547	STATHandHTN3andHTN1.dAug10,STATHandHTN3andHTN1.tAug10,STATHandHTN3andHTN1.vbAug10,STATHandHTN3andHTN1.vgAug10,STATHandHTN3andHTN1.viAug10	uc003hew.2	4.49792	-0.330065
7:111580297:+,7:111584866:+	1.45183	0.813702	6.0308	2.22227e-07	4.85019e-06	6.79351	DOCK4	core	NM_014705	ENST00000342288,ENST00000352877,ENST00000428084,ENST00000437633,ENST00000445943,ENST00000476846,ENST00000544250	DOCK4.aAug10,DOCK4.bAug10,DOCK4.dAug10,DOCK4.gAug10	uc003vfx.2,uc003vfy.2,uc003vga.1,uc010ljt.1	1.92237	-0.47054
14:51492078:+,14:51560836:+	1.06852	2.24427	6.03045	2.22504e-07	4.85412e-06	6.9306	TRIM9	core	NM_015163,NM_052978	ENST00000298355,ENST00000338969,ENST00000360392	TRIM9.aAug10,TRIM9.bAug10,TRIM9.cAug10	uc001wyx.3,uc001wyy.2,uc001wyz.3	0.854268	0.214254
7:111640589:+,7:111644103:+	1.76606	0.47721	6.02897	2.23664e-07	4.87201e-06	6.61014	DOCK4	core	NM_014705	ENST00000342288,ENST00000352877,ENST00000428084,ENST00000437633,ENST00000445943,ENST00000468571,ENST00000476846,ENST00000544250	DOCK4.aAug10,DOCK4.bAug10,DOCK4.dAug10,DOCK4.gAug10,DOCK4.iAug10	uc003vfx.2,uc003vfy.2,uc003vga.1,uc003vgb.1,uc010ljt.1	1.92237	-0.156316
11:118983584:+,11:118984321:+	1.07811	1.96661	6.02742	2.24892e-07	4.8945e-06	6.91897	C2CD2L	core	NM_014807	ENST00000336702,ENST00000528586	C2CD2L.aAug10,C2CD2L.bAug10,C2CD2L.cAug10,C2CD2L.fAug10	uc001pvn.2,uc001pvo.2	1.13942	-0.0613026
12:19519043:+,12:19522627:+	1.34188	1.42267	6.02329	2.2819e-07	4.95445e-06	6.852	PLEKHA5	core	NM_001143821,NM_019012	ENST00000299275,ENST00000317589,ENST00000355397,ENST00000359180,ENST00000424268,ENST00000429027,ENST00000538714,ENST00000538972,ENST00000539256,ENST00000542828,ENST00000543806	PLEKHA5.aAug10,PLEKHA5.bAug10,PLEKHA5.cAug10,PLEKHA5.dAug10,PLEKHA5.eAug10,PLEKHA5.gAug10,PLEKHA5.jAug10	uc001rea.2,uc001reb.2,uc009zin.2,uc009zio.2,uc010sif.1,uc010sig.1	1.25147	0.0904067
2:219533064:+,2:219533328:+	1.14376	1.65861	6.01224	2.37245e-07	5.12773e-06	6.85776	RNF25	core	NM_022453	ENST00000295704,ENST00000423170,ENST00000463188	RNF25.aAug10,RNF25.dAug10,RNF25.eAug10,RNF25.fAug10,RNF25.gAug10	uc002vit.2	0.659255	0.484506
8:79428703:+,8:79510593:+	1.04485	1.6458	6.00938	2.39644e-07	5.16955e-06	6.86053	PKIA	core	NM_181839	ENST00000352966	PKIA.dAug10	uc003ybb.2	0.920455	0.124396
15:25207356:+,15:25219458:+	2.20369	0.25778	6.00086	2.46949e-07	5.29835e-06	6.10464	SNRPN,SNURF	extended	None	None	SNRPN_.dAug10,SNRPN_.nAug10	uc001yws.1	0.252191	1.95149
1:156170263:+,1:156177677:+	1.3205	1.27012	6.00081	2.46989e-07	5.29835e-06	6.76821	SLC25A44	core	NM_014655	ENST00000359511,ENST00000423538,ENST00000469537	SLC25A44.bAug10,SLC25A44.cAug10	uc001fnp.2,uc010phc.1	1.18865	0.131849
16:1779209:+,16:1779488:+	1.22942	1.70152	5.99961	2.48033e-07	5.31727e-06	6.80165	MAPK8IP3	core	NM_001040439,NM_015133	ENST00000250894,ENST00000356010	MAPK8IP3.aAug10,MAPK8IP3.bAug10,MAPK8IP3.cAug10,MAPK8IP3.eAug10,MAPK8IP3.iAug10	uc002cmi.1,uc002cmj.1,uc002cmk.2,uc002cml.2,uc010uvl.1	1.14252	0.0869028
5:73090279:+,5:73091156:+	1.74672	0.0202959	5.99875	2.48789e-07	5.33126e-06	6.48461	RGNEF	core	NM_001080479,NM_001177693	ENST00000287898,ENST00000296794,ENST00000426542,ENST00000437974,ENST00000510131,ENST00000513042,ENST00000545377	RGNEF.aAug10,RGNEF.bAug10,RGNEF.fAug10,RGNEF.oAug10	uc003kcx.2,uc003kcy.1,uc010izf.2,uc011csq.1	0.774721	0.972
1:151675924:+,1:151677507:+	1.54088	0.818858	5.99671	2.50581e-07	5.36391e-06	6.64183	CELF3	core	NM_001172648,NM_001172649,NM_007185	ENST00000290583,ENST00000290585,ENST00000392706,ENST00000420342,ENST00000470688	CELF3.aAug10,CELF3.bAug10,CELF3.cAug10,CELF3.dAug10,CELF3.eAug10,CELF3.fAug10	uc001eyr.2,uc001eys.1,uc009wmx.1,uc009wmy.2,uc010pdh.1	2.01186	-0.470983
20:23383709:+,20:23401942:+	1.22845	1.53951	5.99323	2.53673e-07	5.42343e-06	6.79278	NAPB	core	NM_022080	ENST00000377026,ENST00000398425,ENST00000431864,ENST00000432543,ENST00000468128,ENST00000472855,ENST00000487502	NAPB.aAug10,NAPB.bAug10,NAPB.cAug10,NAPB.dAug10,NAPB.eAug10,NAPB.fAug10,NAPB.kAug10,NAPB.lAug10,NAPB.mAug10,NAPB.pAug10,NAPB.qAug10,NAPB.sAug10,NAPB.tAug10,NAPB.uAug10	uc002wta.2,uc002wtb.2,uc002wtc.2,uc002wtd.3,uc010zst.1	1.24026	-0.0118068
12:19422819:+,12:19427450:+	1.03991	1.92357	5.98599	2.60223e-07	5.55253e-06	6.78243	PLEKHA5	core	NM_001143821,NM_019012	ENST00000299275,ENST00000309364,ENST00000317589,ENST00000355397,ENST00000359180,ENST00000412219,ENST00000424268,ENST00000510738,ENST00000536974,ENST00000538714,ENST00000539256,ENST00000543806	PLEKHA5.bAug10,PLEKHA5.cAug10,PLEKHA5.dAug10,PLEKHA5.eAug10,PLEKHA5.fAug10,PLEKHA5.gAug10,PLEKHA5.iAug10	uc001rea.2,uc001reb.2,uc009zin.2,uc010sif.1,uc010sig.1,uc010sih.1	1.25147	-0.211557
16:65005599:+,16:65005834:+	1.32865	1.2534	5.97519	2.70301e-07	5.74556e-06	6.7083	CDH11	core	NM_001797	ENST00000268603,ENST00000394156,ENST00000538390	CDH11.aAug10,CDH11.bAug10,CDH11.cAug10	uc002eoi.2,uc002eoj.2,uc010cdn.2,uc010vin.1	1.22347	0.105176
2:202688450:+,2:202698571:+	1.50116	0.0747026	5.97492	2.70558e-07	5.74858e-06	6.57699	CDK15	core	NM_139158	ENST00000260967,ENST00000374598,ENST00000410091,ENST00000434439,ENST00000450471,ENST00000451080	CDK15.aAug10,CDK15.bAug10,CDK15.cAug10,CDK15.dAug10,CDK15.fAug10,CDK15.gAug10,CDK15.hAug10	uc002uys.2,uc002uyt.2,uc010ftm.2,uc010ftn.1	1.61332	-0.112153
10:20453496:+,10:20465928:+	2.38153	-0.21215	5.97301	2.72385e-07	5.78128e-06	5.78506	PLXDC2	core	NM_032812	ENST00000377238,ENST00000377242,ENST00000377252,ENST00000536022	PLXDC2.aAug10,PLXDC2.bAug10,PLXDC2.cAug10	uc001iqg.1,uc001iqh.1,uc009xkc.1	2.22435	0.15718
16:426812:+,16:427037:+	1.88915	0.297124	5.97255	2.72828e-07	5.78946e-06	6.24562	TMEM8A	core	NM_021259	ENST00000250930,ENST00000382942,ENST00000427313,ENST00000431232	TMEM8A.aAug10,TMEM8A.bAug10,TMEM8A.cAug10,TMEM8A.hAug10	uc002cgu.3,uc002cgv.3	1.50184	0.38731
10:121191039:+,10:121196163:+	1.40759	0.846063	5.96989	2.75397e-07	5.83656e-06	6.64916	GRK5	core	NM_005308	ENST00000369108,ENST00000392870,ENST00000457057	GRK5.aAug10,GRK5.bAug10,GRK5.cAug10	uc001led.2,uc009xzh.2,uc010qta.1	1.59445	-0.186857
7:111624445:+,7:111629070:+	1.6749	0.587947	5.96776	2.77463e-07	5.87143e-06	6.46811	DOCK4	core	NM_014705	ENST00000342288,ENST00000352877,ENST00000428084,ENST00000437633,ENST00000445943,ENST00000468571,ENST00000476846,ENST00000544250	DOCK4.aAug10,DOCK4.bAug10,DOCK4.dAug10,DOCK4.gAug10,DOCK4.iAug10	uc003vfx.2,uc003vfy.2,uc003vga.1,uc003vgb.1,uc010ljt.1	1.92237	-0.247478
9:34996863:+,9:34997023:+	1.02505	2.04829	5.95759	2.87574e-07	6.05749e-06	6.68677	DNAJB5	core	NM_001135004,NM_001135005,NM_012266	ENST00000312316,ENST00000335998,ENST00000378751,ENST00000453597,ENST00000454002,ENST00000469798,ENST00000538278,ENST00000541010,ENST00000545841	DNAJB5.aAug10,DNAJB5.bAug10,DNAJB5.cAug10,DNAJB5.dAug10,DNAJB5.gAug10	uc003zvs.2,uc003zvt.2,uc011los.1	1.18277	-0.157721
4:156717662:+,4:156721029:+	1.2332	1.48825	5.95353	2.91719e-07	6.13263e-06	6.66208	GUCY1B3	core	NM_000857	ENST00000264424,ENST00000502959,ENST00000503520,ENST00000505154,ENST00000505764,ENST00000507146,ENST00000513437	GUCY1B3.aAug10,GUCY1B3.bAug10,GUCY1B3.cAug10,GUCY1B3.dAug10,GUCY1B3.eAug10,GUCY1B3.fAug10,GUCY1B3.gAug10,GUCY1B3.hAug10	uc003ipc.2,uc003ipd.2,uc010iqf.2,uc010iqg.2,uc011cio.1,uc011cip.1,uc011ciq.1	0.950385	0.282811
10:121203264:+,10:121207635:+	1.65486	0.511612	5.95259	2.92685e-07	6.15093e-06	6.415	GRK5	core	NM_005308	ENST00000369108,ENST00000392870	GRK5.aAug10,GRK5.bAug10,GRK5.cAug10	uc001led.2,uc009xzh.2	1.59445	0.0604082
2:189434082:+,2:189434755:+	1.00516	1.93776	5.95211	2.93178e-07	6.15999e-06	6.66804	GULP1	core	NM_001252668,NM_001252669,NM_016315,NR_045562,NR_045563	ENST00000359135,ENST00000409580,ENST00000409609,ENST00000409805,ENST00000409830,ENST00000409843,ENST00000467422,ENST00000476422,ENST00000495745	GULP1.aAug10,GULP1.bAug10,GULP1.cAug10,GULP1.dAug10,GULP1.eAug10,GULP1.fAug10,GULP1.gAug10,GULP1.hAug10,GULP1.iAug10,GULP1.qAug10	uc002uqd.2,uc002uqf.2,uc002uqg.2,uc010fru.2,uc010zfw.1	0.919231	0.0859276
11:8974884:+,11:8977737:+	1.11116	1.8915	5.95112	2.94203e-07	6.17894e-06	6.66196	TMEM9B	core	NM_020644	ENST00000309134,ENST00000525069,ENST00000528117,ENST00000530136,ENST00000534025	TMEM9B.aAug10,TMEM9B.bAug10,TMEM9B.cAug10,TMEM9B.dAug10,TMEM9B.eAug10	uc001mhe.1,uc001mhf.1,uc010rbt.1	0.768031	0.343126
10:99511219:+,10:99512795:+	1.20343	1.63887	5.94666	2.98856e-07	6.2583e-06	6.63155	ZFYVE27	core	NM_001002262,NM_001174119,NM_001174120,NM_001174121,NM_001174122	ENST00000337540,ENST00000357540,ENST00000359980,ENST00000370610,ENST00000370613,ENST00000453958,ENST00000497994	ZFYVE27.aAug10,ZFYVE27.dAug10,ZFYVE27.eAug10,ZFYVE27.fAug10,ZFYVE27.gAug10,ZFYVE27.hAug10,ZFYVE27.jAug10,ZFYVE27.kAug10,ZFYVE27.lAug10,ZFYVE27.mAug10,ZFYVE27.nAug10,ZFYVE27.oAug10,ZFYVE27.pAug10,ZFYVE27.rAug10	uc001kok.1,uc001kom.1,uc001kop.2,uc001koq.2,uc010qpa.1,uc010qpb.1,uc010qpc.1,uc010qpd.1	1.19552	0.00790211
2:220397199:+,2:220397605:+	1.56488	1.10267	5.94525	3.00338e-07	6.28541e-06	6.43945	ACCN4	core	NM_018674	ENST00000358078,ENST00000473709,ENST00000474489	ACCN4.aAug10,ACCN4.cAug10,ACCN4.fAug10,ACCN4.gAug10	uc002vlz.2,uc002vmb.2,uc010fwj.1	1.73459	-0.169711
12:58022929:+,12:58023935:+	1.92677	0.0978024	5.94496	3.00647e-07	6.28924e-06	6.15832	B4GALNT1	core	NM_001478	ENST00000341156,ENST00000418555,ENST00000552798,ENST00000553142	B4GALNT1.aAug10,B4GALNT1.bAug10,B4GALNT1.cAug10	uc001spg.1,uc010sru.1	1.42806	0.498712
X:19024223:+,X:19024338:+	1.48641	0.5278	5.94186	3.03939e-07	6.35015e-06	6.49303	GPR64	core	NM_001079858,NM_001079859,NM_001079860,NM_001184833,NM_001184834,NM_001184835,NM_001184836,NM_001184837,NM_005756	ENST00000340581,ENST00000354791,ENST00000356606,ENST00000357544,ENST00000357991,ENST00000360279,ENST00000379869,ENST00000379873,ENST00000379876,ENST00000379878,ENST00000397917	GPR64.aAug10,GPR64.bAug10,GPR64.cAug10,GPR64.dAug10,GPR64.eAug10,GPR64.fAug10,GPR64.gAug10,GPR64.hAug10,GPR64.iAug10,GPR64.jAug10,GPR64.kAug10	uc004cyw.2,uc004cyx.2,uc004cyy.2,uc004cyz.2,uc004cza.2,uc004czb.2,uc004czc.2,uc004czd.2,uc004cze.2,uc004czf.2,uc010nfj.2	1.29067	0.195739
10:121182778:+,10:121184505:+	1.56205	0.696643	5.94175	3.04054e-07	6.3508e-06	6.4469	GRK5	core	NM_005308	ENST00000369108,ENST00000392870,ENST00000457057	GRK5.aAug10,GRK5.bAug10,GRK5.cAug10,GRK5.dAug10	uc001led.2,uc009xzh.2,uc010qta.1	1.59445	-0.032395
19:13885717:+,19:13888866:+	3.81201	-0.893448	5.93976	3.06195e-07	6.38798e-06	3.88243	C19orf53	extended	None	None	MRI1andC19orf53.kAug10	None	0.204362	3.60765
15:74277854:+,15:74280940:+	1.32727	1.30314	5.93915	3.06855e-07	6.4004e-06	6.57617	STOML1	core	NM_004809	ENST00000316900,ENST00000316911,ENST00000359750,ENST00000541638	STOML1.aAug10,STOML1.bAug10,STOML1.cAug10,STOML1.dAug10,STOML1.eAug10,STOML1.fAug10,STOML1.gAug10,STOML1.hAug10,STOML1.iAug10,STOML1.jAug10,STOML1.lAug10	uc002awe.2,uc002awf.2,uc002awg.2,uc002awh.2,uc002awi.2,uc010bje.2,uc010uld.1	1.39639	-0.0691216
5:146080705:+,5:146236062:+	4.52738	-1.55143	5.93908	3.06924e-07	6.40052e-06	2.77853	PPP2R2B	core	NM_181678	ENST00000394410,ENST00000508545,ENST00000512639,ENST00000528601,ENST00000532154	PPP2R2B.hAug10,PPP2R2B.iAug10,PPP2R2B.lAug10,PPP2R2B.rAug10,PPP2R2B.vaAug10,PPP2R2B.vdAug10,PPP2R2B.vmAug10,PPP2R2B.vrAug10,PPP2R2B.vsAug10,PPP2R2B.vyAug10	uc003lok.3,uc010jgm.2	1.87928	2.6481
11:20869299:+,11:20906990:+	1.36425	0.473605	5.92728	3.19934e-07	6.62634e-06	6.50852	NELL1	core	NM_006157,NM_201551	ENST00000298925,ENST00000357134,ENST00000527873,ENST00000529595,ENST00000532434	NELL1.aAug10,NELL1.bAug10,NELL1.cAug10,NELL1.fAug10,NELL1.hAug10,NELL1.jAug10	uc001mqe.2,uc001mqf.2,uc009yid.2	1.41287	-0.0486173
7:111428803:+,7:111430513:+	2.02744	0.0323119	5.92677	3.20511e-07	6.63417e-06	6.00421	DOCK4	core	NM_014705	ENST00000342288,ENST00000352877,ENST00000423057,ENST00000428084,ENST00000437633,ENST00000445943,ENST00000469898	DOCK4.aAug10,DOCK4.bAug10,DOCK4.cAug10	uc003vfw.2,uc003vfx.2,uc003vfy.2	1.92237	0.105069
2:114483114:+,2:114486978:+	1.16432	2.01834	5.92635	3.20981e-07	6.64253e-06	6.58095	SLC35F5	core	NM_025181	ENST00000245680,ENST00000409106,ENST00000447673,ENST00000470204	SLC35F5.aAug10,SLC35F5.bAug10,SLC35F5.cAug10,SLC35F5.fAug10	uc002tkt.2,uc002tku.1	0.718109	0.446214
13:80911891:+,13:80912868:+	2.53793	0.567713	5.92613	3.21234e-07	6.64503e-06	5.48543	SPRY2	extended	None	ENST00000377102,ENST00000541655	SPRY2.bAug10	uc001vli.2	1.07383	1.46411
2:112858272:+,2:112863579:+	1.93763	0.633094	5.92549	3.21957e-07	6.65861e-06	6.04887	TMEM87B	core	NM_032824	ENST00000283206	TMEM87B.aAug10	uc002thm.2	1.73822	0.199405
17:40653322:+,17:40659538:+	1.08073	2.03735	5.92516	3.22328e-07	6.66353e-06	6.57934	ATP6V0A1	core	NM_001130020,NM_001130021,NM_005177	ENST00000264649,ENST00000343619,ENST00000393829,ENST00000537728,ENST00000544137,ENST00000546249	ATP6V0A1.aAug10,ATP6V0A1.bAug10,ATP6V0A1.cAug10,ATP6V0A1.dAug10,ATP6V0A1.eAug10,ATP6V0A1.fAug10,ATP6V0A1.gAug10,ATP6V0A1.nAug10,ATP6V0A1.sAug10,ATP6V0A1.vjAug10	uc002hzq.2,uc002hzr.2,uc002hzs.2,uc010cyg.2,uc010wgj.1,uc010wgk.1,uc010wgl.1	0.961028	0.119706
11:26619994:+,11:26620405:+	4.16113	-1.93091	5.91789	3.30674e-07	6.81078e-06	3.14487	ANO3	core	NM_031418	ENST00000256737,ENST00000525139,ENST00000531568,ENST00000537978,ENST00000538001	ANO3.aAug10,ANO3.bAug10,ANO3.cAug10	uc001mqt.3,uc010rdr.1,uc010rds.1,uc010rdt.1	5.45906	-1.29793
16:427585:+,16:427671:+	1.99536	0.263203	5.91385	3.35407e-07	6.89835e-06	5.96441	TMEM8A	core	NM_021259	ENST00000250930,ENST00000382942,ENST00000431232,ENST00000476735	TMEM8A.aAug10,TMEM8A.bAug10,TMEM8A.hAug10	uc002cgu.3,uc002cgv.3	1.50184	0.493514
11:95598840:+,11:95620776:+	1.08049	1.75773	5.91147	3.38225e-07	6.9506e-06	6.53089	MTMR2	extended	None	ENST00000409459,ENST00000472423,ENST00000495134	MTMR2.kAug10,MTMR2.lAug10,MTMR2.oAug10,MTMR2.qAug10,MTMR2.rAug10,MTMR2.vaAug10,MTMR2.vfAug10	None	0.596526	0.483959
22:25844251:+,22:25851679:+	1.27651	1.35026	5.9086	3.41652e-07	7.01672e-06	6.47809	CRYBB2P1	core	NR_033734	ENST00000382734	CRYBB2P1andADRBK2.jAug10,CRYBB2P1andADRBK2.vfAug10,CRYBB2P1andADRBK2.vgAug10,CRYBB2P1andADRBK2.viAug10	uc003abu.2	1.0795	0.197007
1:153750831:+,1:153750939:+	1.75041	0.63074	5.90717	3.43382e-07	7.05021e-06	6.1783	SLC27A3	core	NM_024330	ENST00000271857,ENST00000368661,ENST00000458027,ENST00000531251,ENST00000532853	SLC27A3.aAug10,SLC27A3.bAug10,SLC27A3.dAug10,SLC27A3.eAug10	uc001fcz.2	1.62818	0.122232
10:20290915:+,10:20335798:+	2.98683	-0.448575	5.90221	3.49413e-07	7.15705e-06	4.87744	PLXDC2	core	NM_032812	ENST00000377252,ENST00000536022	PLXDC2.aAug10,PLXDC2.cAug10	uc001iqg.1	2.22435	0.762484
2:191819544:+,2:191827556:+	1.27845	2.01536	5.90184	3.49875e-07	7.16448e-06	6.47068	GLS	core	NM_014905	ENST00000320717,ENST00000409428	GLS.aAug10,GLS.cAug10,GLS.gAug10,GLS.jAug10,GLS.pAug10	uc002usf.2,uc002ush.2,uc010zgi.1,uc010zgj.1	0.357877	0.920572
7:111517242:+,7:111535668:+	1.85004	0.265413	5.89451	3.59008e-07	7.32365e-06	6.07921	DOCK4	core	NM_014705	ENST00000342288,ENST00000352877,ENST00000428084,ENST00000437633,ENST00000445943,ENST00000476846,ENST00000544250	DOCK4.aAug10,DOCK4.bAug10,DOCK4.dAug10	uc003vfx.2,uc003vfy.2,uc003vga.1	1.92237	-0.0723302
7:24874355:+,7:24880309:+	1.00783	1.99901	5.88804	3.67262e-07	7.4677e-06	6.45336	OSBPL3	core	NM_015550,NM_145320,NM_145321,NM_145322	ENST00000313367,ENST00000352860,ENST00000353930,ENST00000396429,ENST00000396431,ENST00000409069,ENST00000409452,ENST00000409555,ENST00000409759,ENST00000409863,ENST00000431825	OSBPL3.aAug10,OSBPL3.bAug10,OSBPL3.cAug10,OSBPL3.dAug10,OSBPL3.eAug10,OSBPL3.fAug10,OSBPL3.gAug10,OSBPL3.hAug10	uc003sxd.2,uc003sxe.2,uc003sxf.2,uc003sxg.2,uc003sxh.2,uc003sxi.2,uc003sxj.1,uc003sxk.1	1.34571	-0.337885
10:61932161:+,10:61932658:+	2.01932	-0.338847	5.88693	3.68698e-07	7.49387e-06	5.88038	ANK3	core	NM_001204403,NM_001204404,NM_020987	ENST00000280772,ENST00000373827,ENST00000395293,ENST00000395299,ENST00000395302,ENST00000395304,ENST00000503366,ENST00000510495,ENST00000536348	ANK3.aAug10,ANK3.bAug10,ANK3.cAug10,ANK3.dAug10,ANK3.eAug10,ANK3.hAug10	uc001jky.2,uc001jkz.3,uc001jlb.1,uc001jlc.1,uc010qih.1	1.6071	0.412217
1:99766522:+,1:99771241:+	2.4983	-0.44275	5.88682	3.68845e-07	7.49534e-06	5.35298	LPPR4	core	NM_001166252	ENST00000457765	LPPR4.bAug10	uc010oue.1	1.32678	1.17152
12:89743338:+,12:89744365:+	1.58004	1.00382	5.88173	3.75501e-07	7.61053e-06	6.2338	DUSP6	core	NM_001946	ENST00000279488,ENST00000547140,ENST00000547291	DUSP6.aAug10,DUSP6.bAug10,DUSP6.dAug10	uc001tay.2	1.84036	-0.260329
7:111377045:+,7:111379190:+	1.88161	0.284481	5.87766	3.80909e-07	7.70768e-06	5.98046	DOCK4	core	NM_014705	ENST00000342288,ENST00000352877,ENST00000423057,ENST00000428084,ENST00000437633,ENST00000445943,ENST00000486186,ENST00000494651	DOCK4.aAug10,DOCK4.bAug10,DOCK4.cAug10,DOCK4.eAug10,DOCK4.fAug10,DOCK4.hAug10	uc003vfv.2,uc003vfw.2,uc003vfx.2,uc003vfy.2,uc011kml.1,uc011kmm.1	1.92237	-0.0407603
12:27677298:+,12:27731085:+	1.02694	1.93291	5.87627	3.82775e-07	7.7392e-06	6.417	PPFIBP1	core	NM_001198915,NM_001198916,NM_003622,NM_177444	ENST00000228425,ENST00000318304,ENST00000535047,ENST00000537927,ENST00000540114,ENST00000541633,ENST00000542629,ENST00000543820,ENST00000545334,ENST00000545381	PPFIBP1.aAug10,PPFIBP1.bAug10,PPFIBP1.cAug10,PPFIBP1.dAug10,PPFIBP1.eAug10,PPFIBP1.gAug10,PPFIBP1.kAug10,PPFIBP1.rAug10,PPFIBP1.uAug10	uc001rhy.1,uc001rhz.1,uc001ria.2,uc001rib.1,uc001ric.1,uc001rid.1,uc010sjr.1	0.648299	0.378638
17:40613029:+,17:40618447:+	1.12681	1.78164	5.87412	3.85666e-07	7.78821e-06	6.40457	ATP6V0A1	core	NM_001130020,NM_001130021,NM_005177	ENST00000264649,ENST00000343619,ENST00000393829,ENST00000537728,ENST00000546249	ATP6V0A1.aAug10,ATP6V0A1.bAug10,ATP6V0A1.cAug10,ATP6V0A1.dAug10,ATP6V0A1.eAug10,ATP6V0A1.fAug10,ATP6V0A1.hAug10,ATP6V0A1.kAug10,ATP6V0A1.mAug10,ATP6V0A1.pAug10,ATP6V0A1.tAug10,ATP6V0A1.uAug10,ATP6V0A1.vbAug10,ATP6V0A1.vhAug10,ATP6V0A1.viAug10,ATP6V0A1.vlAug10	uc002hzp.1,uc002hzq.2,uc002hzr.2,uc002hzs.2,uc010wgj.1,uc010wgk.1	0.961028	0.165777
3:193854277:+,3:193854406:+	1.63733	0.839763	5.87257	3.87772e-07	7.82602e-06	6.13664	HES1	core	NM_005524	ENST00000232424,ENST00000476918	HES1.aAug10,HES1.cAug10,HES1.dAug10	uc003ftq.1,uc011bst.1	1.57989	0.0574359
10:121207772:+,10:121212183:+	2.02103	0.111305	5.86496	3.98286e-07	8.01078e-06	5.79537	GRK5	core	NM_005308	ENST00000369108,ENST00000392870,ENST00000457057	GRK5.aAug10,GRK5.bAug10,GRK5.cAug10	uc001led.2,uc009xzh.2	1.59445	0.426585
1:12052747:+,1:12056213:+	1.0367	2.13241	5.86249	4.01759e-07	8.0677e-06	6.37121	MFN2	core	NM_001127660,NM_014874	ENST00000235329,ENST00000444836	MFN2.aAug10,MFN2.bAug10,MFN2.cAug10,MFN2.dAug10,MFN2.eAug10,MFN2.fAug10,MFN2.iAug10,MFN2.jAug10,MFN2.mAug10	uc001atn.3,uc009vni.2	0.915216	0.121481
7:111512146:+,7:111512325:+	2.02452	0.0239121	5.86183	4.02693e-07	8.08159e-06	5.77076	DOCK4	core	NM_014705	ENST00000342288,ENST00000352877,ENST00000423057,ENST00000428084,ENST00000437633,ENST00000445943,ENST00000476846,ENST00000492532,ENST00000544250	DOCK4.aAug10,DOCK4.bAug10,DOCK4.cAug10,DOCK4.dAug10,DOCK4.oAug10	uc003vfw.2,uc003vfx.2,uc003vfy.2,uc003vga.1	1.92237	0.102143
10:61848116:+,10:61865663:+	1.83059	-0.156307	5.86137	4.03345e-07	8.09143e-06	6.0083	ANK3	core	NM_001149,NM_001204403,NM_001204404,NM_020987	ENST00000280772,ENST00000355288,ENST00000373817,ENST00000373827,ENST00000395293,ENST00000395299,ENST00000395302,ENST00000395304,ENST00000423532,ENST00000467420,ENST00000503366,ENST00000510495,ENST00000536348,ENST00000544789	ANK3.aAug10,ANK3.bAug10,ANK3.cAug10,ANK3.dAug10,ANK3.eAug10,ANK3.fAug10,ANK3.gAug10,ANK3.hAug10,ANK3.iAug10,ANK3.kAug10	uc001jkw.2,uc001jkx.2,uc001jky.2,uc001jkz.3,uc001jla.1,uc001jlb.1,uc009xpa.2,uc010qih.1	1.6071	0.223484
9:23705069:+,9:23731020:+	2.0057	0.988116	5.85368	4.14376e-07	8.27629e-06	5.88056	ELAVL2	core	NM_001171195,NM_001171197,NM_004432	ENST00000223951,ENST00000359598,ENST00000380110,ENST00000380117,ENST00000397312,ENST00000423281,ENST00000440102,ENST00000544538	ELAVL2.aAug10,ELAVL2.bAug10,ELAVL2.cAug10,ELAVL2.dAug10,ELAVL2.eAug10,ELAVL2.fAug10,ELAVL2.gAug10,ELAVL2.jAug10	uc003zps.2,uc003zpt.2,uc003zpu.2,uc003zpv.2,uc003zpw.2	1.50319	0.502509
15:59350749:+,15:59358963:+	1.18847	1.35218	5.84967	4.20254e-07	8.38033e-06	6.31158	RNF111	core	NM_017610	ENST00000348370,ENST00000434298,ENST00000557998,ENST00000559209,ENST00000561186	RNF111.aAug10,RNF111.bAug10,RNF111.cAug10,RNF111.dAug10,RNF111.eAug10,RNF111.fAug10	uc002afs.2,uc002aft.2,uc002afu.2,uc002afv.2,uc002afw.2	0.588088	0.60038
14:75746831:+,14:75747263:+	4.4779	-1.68116	5.84732	4.23739e-07	8.44311e-06	2.60041	FOS	core	NM_005252	ENST00000303562,ENST00000554212,ENST00000555242,ENST00000555686	FOS.aAug10,FOS.cAug10,FOS.fAug10,FOS.kAug10	uc001xrn.2,uc010asi.2	3.62213	0.855768
X:48891297:+,X:48891649:+	1.08727	1.78768	5.8389	4.36457e-07	8.66724e-06	6.29047	TFE3	core	NM_006521	ENST00000315869,ENST00000478476,ENST00000487451,ENST00000493583	TFE3.aAug10,TFE3.bAug10,TFE3.cAug10,TFE3.dAug10,TFE3.jAug10,TFE3.lAug10	uc004dmb.3,uc004dmc.3,uc004dme.1	0.958556	0.128715
1:154935070:+,1:154935995:+	2.47754	-0.28036	5.83796	4.37903e-07	8.688e-06	5.11547	SHC1	extended	None	None	SHC1andPYGO2andPBXIP1.vyAug10	None	0.732193	1.74535
5:112399864:+,5:112403777:+	1.12699	1.70941	5.83676	4.39752e-07	8.71713e-06	6.28307	MCC	core	NM_001085377,NM_002387	ENST00000302475,ENST00000408903,ENST00000514701,ENST00000515367	MCC.aAug10,MCC.bAug10,MCC.cAug10,MCC.dAug10,MCC.eAug10,MCC.fAug10	uc003kqj.3,uc003kqk.3,uc003kql.3,uc011cwb.1	1.22735	-0.100361
6:166864721:+,6:166872937:+	1.41248	1.34651	5.83219	4.4686e-07	8.83855e-06	6.20193	RPS6KA2	core	NM_001006932,NM_021135	ENST00000265678,ENST00000405189,ENST00000481261,ENST00000491836,ENST00000503859,ENST00000510118	RNASET2andRPS6KA2.aAug10,RNASET2andRPS6KA2.bAug10,RNASET2andRPS6KA2.cAug10,RNASET2andRPS6KA2.dAug10,RNASET2andRPS6KA2.eAug10,RNASET2andRPS6KA2.oAug10	uc003qvb.1,uc003qvc.1,uc003qvd.1,uc010kkl.1,uc011ego.1	1.39312	0.0193583
6:166904229:+,6:166911996:+	1.38132	1.38876	5.82507	4.58163e-07	9.03207e-06	6.16888	RPS6KA2	core	NM_001006932,NM_021135	ENST00000265678,ENST00000366863,ENST00000366865,ENST00000405189,ENST00000481261,ENST00000503859,ENST00000510118	RNASET2andRPS6KA2.aAug10,RNASET2andRPS6KA2.bAug10,RNASET2andRPS6KA2.cAug10,RNASET2andRPS6KA2.dAug10,RNASET2andRPS6KA2.eAug10,RNASET2andRPS6KA2.jAug10	uc003qvb.1,uc003qvc.1,uc003qvd.1,uc010kkl.1,uc011ego.1	1.39312	-0.011796
16:47117712:+,16:47143394:+	1.89327	0.139554	5.82224	4.62733e-07	9.10963e-06	5.73829	NETO2	extended	None	None	ITFG1andNETO2.hAug10	uc002eeq.1	0.681277	1.21199
2:149853854:+,2:149854914:+	1.02575	2.34049	5.82188	4.63327e-07	9.11764e-06	6.23595	KIF5C	core	NM_004522	ENST00000334436,ENST00000397413,ENST00000414838,ENST00000435030,ENST00000464066	KIF5C.aAug10,KIF5C.bAug10,KIF5C.eAug10	uc002tws.1,uc010zbu.1	1.0984	-0.0726573
6:134492870:+,6:134493331:+	1.02724	2.28448	5.81978	4.66757e-07	9.17443e-06	6.22945	SGK1	core	NM_001143676,NM_001143677,NM_001143678,NM_005627	ENST00000237305,ENST00000367855,ENST00000367857,ENST00000367858,ENST00000413996,ENST00000475719,ENST00000477460,ENST00000489458,ENST00000525877,ENST00000528577,ENST00000531782	SGK1.aAug10,SGK1.bAug10,SGK1.cAug10,SGK1.dAug10,SGK1.eAug10,SGK1.fAug10,SGK1.gAug10,SGK1.hAug10,SGK1.iAug10,SGK1.jAug10,SGK1.kAug10,SGK1.lAug10	uc003qen.3,uc003qeo.3,uc011ect.1,uc011ecu.1,uc011ecv.1,uc011ecw.1	1.11953	-0.0922869
1:153749203:+,1:153749538:+	2.34414	0.142162	5.81859	4.6871e-07	9.2074e-06	5.39583	SLC27A3	core	NM_024330	ENST00000271857,ENST00000368661,ENST00000458027,ENST00000461269,ENST00000468403,ENST00000483574,ENST00000484014	SLC27A3.aAug10,SLC27A3.bAug10,SLC27A3.cAug10,SLC27A3.dAug10,SLC27A3.fAug10	uc001fcz.2,uc009won.2	1.62818	0.71596
9:35608246:+,9:35608392:+	2.7915	-0.456471	5.81555	4.73734e-07	9.29516e-06	4.6937	TESK1	core	NM_006285	ENST00000336395,ENST00000498522,ENST00000535770	TESK1.aAug10,TESK1.bAug10,TESK1.dAug10,TESK1.gAug10	uc003zwz.1,uc003zxa.2,uc010mks.2	2.78914	0.00236114
10:20357168:+,10:20432224:+	2.68137	-0.481745	5.81446	4.75545e-07	9.32309e-06	4.7782	PLXDC2	core	NM_032812	ENST00000377238,ENST00000377242,ENST00000377252,ENST00000536022	PLXDC2.aAug10,PLXDC2.bAug10,PLXDC2.cAug10	uc001iqg.1,uc001iqh.1	2.22435	0.457024
7:111638558:+,7:111640549:+	1.76601	0.413767	5.81267	4.78552e-07	9.36769e-06	5.90825	DOCK4	core	NM_014705	ENST00000342288,ENST00000352877,ENST00000428084,ENST00000437633,ENST00000445943,ENST00000468571,ENST00000476846,ENST00000544250	DOCK4.aAug10,DOCK4.bAug10,DOCK4.dAug10,DOCK4.gAug10,DOCK4.iAug10	uc003vfx.2,uc003vfy.2,uc003vga.1,uc003vgb.1,uc010ljt.1	1.92237	-0.156361
5:14461420:+,5:14462864:+	1.05483	2.21878	5.81216	4.79402e-07	9.38066e-06	6.20221	TRIO	core	NM_007118	ENST00000344204,ENST00000512070,ENST00000513206,ENST00000515144,ENST00000515710,ENST00000537187	TRIO.aAug10,TRIO.bAug10,TRIO.cAug10,TRIO.gAug10,TRIO.mAug10	uc003jff.2,uc003jfg.2,uc003jfh.1,uc003jfi.1	0.614629	0.440198
X:135814331:+,X:135825744:+	1.39247	0.756833	5.81092	4.81495e-07	9.41243e-06	6.09807	ARHGEF6	core	NM_004840	ENST00000250617,ENST00000370620,ENST00000370622,ENST00000535736	ARHGEF6.aAug10,ARHGEF6.bAug10,ARHGEF6.cAug10,ARHGEF6.eAug10,ARHGEF6.fAug10,ARHGEF6.gAug10	uc004fab.2,uc011mwe.1	0.893881	0.498593
11:67232327:+,11:67232527:+	2.09255	0.18085	5.80733	4.87593e-07	9.51494e-06	5.57401	TMEM134	core	NM_001078651,NM_025124	ENST00000308022,ENST00000535175,ENST00000537601,ENST00000541059,ENST00000545682	TMEM134.bAug10,TMEM134.cAug10,TMEM134.dAug10,TMEM134.eAug10,TMEM134.fAug10,TMEM134.iAug10,TMEM134.kAug10,TMEM134.oAug10,TMEM134.rAug10,TMEM134.sAug10,TMEM134.uAug10,TMEM134.vaAug10,TMEM134.vcAug10,TMEM134.veAug10	uc001olp.1,uc001olq.1,uc001ols.1,uc001olt.1	1.85887	0.23368
2:151343969:+,2:151344063:+	1.17355	1.60443	5.80708	4.88027e-07	9.52156e-06	6.17537	RND3	core	NM_005168	ENST00000263895	RND3.bAug10,RND3.gAug10	uc002txg.2,uc010zbv.1	0.742921	0.430631
X:135767982:+,X:135770091:+	1.14698	1.37175	5.80449	4.92481e-07	9.59911e-06	6.16916	ARHGEF6	core	NM_004840	ENST00000250617,ENST00000370620,ENST00000370622,ENST00000535227,ENST00000535736	ARHGEF6.aAug10,ARHGEF6.bAug10,ARHGEF6.cAug10,ARHGEF6.dAug10,ARHGEF6.eAug10,ARHGEF6.jAug10	uc004fab.2,uc011mwd.1,uc011mwe.1	0.893881	0.253096
22:42462808:+,22:42463117:+	1.11172	1.54861	5.80094	4.98645e-07	9.68912e-06	6.1635	NAGA	core	NM_000262	ENST00000396398,ENST00000402937,ENST00000403363,ENST00000481068	NAGA.aAug10,NAGA.bAug10,NAGA.cAug10,NAGA.eAug10	uc003bbw.3,uc003bbx.2,uc003bby.2	0.816976	0.294741
11:47187937:+,11:47188057:+	1.15935	1.73902	5.79426	5.10479e-07	9.87886e-06	6.13566	ARFGAP2	core	NM_001242832,NM_032389	ENST00000319543,ENST00000395449,ENST00000419701,ENST00000426335,ENST00000524782,ENST00000527776,ENST00000533243	PACSIN3andARFGAP2.aAug10,PACSIN3andARFGAP2.bAug10,PACSIN3andARFGAP2.cAug10,PACSIN3andARFGAP2.dAug10,PACSIN3andARFGAP2.hAug10,PACSIN3andARFGAP2.pAug10,PACSIN3andARFGAP2.qAug10,PACSIN3andARFGAP2.sAug10	uc001ndt.2,uc001ndu.2,uc010rha.1,uc010rhb.1,uc010rhc.1	0.952578	0.206772
2:42483770:+,2:42490318:+	1.33268	1.68912	5.79317	5.1243e-07	9.91278e-06	6.11076	EML4	core	NM_001145076	ENST00000402711	EML4.bAug10,EML4.cAug10	uc010fap.2	0.250766	1.08191
2:232100094:+,2:232104656:+	1.0744	1.68854	5.79289	5.12927e-07	9.92048e-06	6.14015	ARMC9	core	NM_025139	ENST00000349938,ENST00000359743,ENST00000444285,ENST00000483477	ARMC9.aAug10,ARMC9.bAug10,ARMC9.eAug10	uc002vrp.3,uc002vrq.3	0.862195	0.212204
7:95499310:+,7:95606824:+	1.64032	0.686683	5.7893	5.19436e-07	1.00367e-05	5.88554	DYNC1I1	core	NM_001135556,NM_001135557,NM_004411	ENST00000324972,ENST00000359388,ENST00000437599,ENST00000447467,ENST00000457059,ENST00000519371,ENST00000537881	DYNC1I1.aAug10,DYNC1I1.bAug10,DYNC1I1.cAug10,DYNC1I1.dAug10,DYNC1I1.eAug10,DYNC1I1.fAug10,DYNC1I1.hAug10,DYNC1I1.tAug10	uc003uob.2,uc003uoc.3,uc003uod.3,uc003uoe.3,uc010lfl.2	1.22445	0.415868
2:167089972:+,2:167094604:+	2.7241	-0.352844	5.78545	5.26502e-07	1.01472e-05	4.90578	SCN9A	core	NM_002977	ENST00000303354,ENST00000375387,ENST00000409435,ENST00000409672	SCN9A.aAug10	uc010fpl.2	1.86614	0.85796
2:191796363:+,2:191818291:+	1.27318	1.86246	5.78035	5.35991e-07	1.03069e-05	6.0499	GLS	core	NM_014905	ENST00000320717,ENST00000409428,ENST00000412247,ENST00000457316	GLS.aAug10,GLS.cAug10,GLS.dAug10,GLS.gAug10,GLS.jAug10	uc002usf.2,uc002ush.2,uc010zgi.1,uc010zgj.1	0.357877	0.915308
10:99498431:+,10:99502851:+	1.81287	0.565619	5.76454	5.66549e-07	1.08106e-05	5.63405	ZFYVE27	core	NM_001002261,NM_001002262,NM_144588	ENST00000356257,ENST00000359980,ENST00000393677,ENST00000423811,ENST00000453958	ZFYVE27.bAug10,ZFYVE27.cAug10,ZFYVE27.dAug10,ZFYVE27.eAug10,ZFYVE27.gAug10,ZFYVE27.iAug10,ZFYVE27.qAug10	uc001kol.1,uc001kom.1,uc001kon.2,uc001koo.2,uc001kop.2,uc010qpc.1	1.19552	0.617351
10:61958295:+,10:61959887:+	1.86083	-0.382029	5.75886	5.77935e-07	1.09933e-05	5.58694	ANK3	core	NM_001204403,NM_001204404,NM_020987	ENST00000280772,ENST00000373827,ENST00000395293,ENST00000395299,ENST00000395302,ENST00000395304,ENST00000503366,ENST00000510495,ENST00000536348	ANK3.aAug10,ANK3.bAug10,ANK3.cAug10,ANK3.dAug10,ANK3.hAug10	uc001jky.2,uc001jkz.3,uc001jlb.1,uc001jlc.1,uc010qih.1	1.6071	0.253724
12:19498822:+,12:19501333:+	1.17285	1.47499	5.75627	5.83203e-07	1.10788e-05	6.01543	PLEKHA5	core	NM_001143821,NM_019012	ENST00000299275,ENST00000355397,ENST00000538714,ENST00000539256	PLEKHA5.bAug10,PLEKHA5.cAug10,PLEKHA5.gAug10	uc001rea.2,uc001reb.2,uc009zin.2	1.25147	-0.0786171
11:118983102:+,11:118983192:+	1.51538	1.15115	5.75263	5.90683e-07	1.1203e-05	5.87214	C2CD2L	core	NM_014807	ENST00000336702,ENST00000525598,ENST00000528586	C2CD2L.aAug10,C2CD2L.bAug10,C2CD2L.cAug10,C2CD2L.dAug10	uc001pvn.2,uc001pvo.2	1.13942	0.375961
2:112854868:+,2:112856172:+	1.72835	0.938205	5.74754	6.01312e-07	1.13816e-05	5.70435	TMEM87B	core	NM_032824	ENST00000283206,ENST00000463427	TMEM87B.aAug10,TMEM87B.bAug10	uc002thm.2	1.73822	-0.0098666
3:40456331:+,3:40457331:+	2.99589	-1.52554	5.74568	6.05254e-07	1.1446e-05	4.18256	ENTPD3	core	NM_001248	ENST00000301825,ENST00000445129,ENST00000456402	ENTPD3.aAug10,ENTPD3.bAug10,ENTPD3.cAug10,ENTPD3.dAug10	uc003ckd.3,uc010hhy.2	2.10296	0.89293
2:232104754:+,2:232121299:+	1.03561	1.58931	5.74307	6.10809e-07	1.15441e-05	5.97545	ARMC9	core	NM_025139	ENST00000349938,ENST00000359743,ENST00000483477	ARMC9.aAug10,ARMC9.bAug10	uc002vrp.3,uc002vrq.3	0.862195	0.17342
3:178745311:+,3:178745434:+	1.58263	1.01197	5.74169	6.13765e-07	1.15889e-05	5.77749	ZMAT3	core	NM_022470,NM_152240	ENST00000311417,ENST00000432729	ZMAT3.aAug10,ZMAT3.bAug10,ZMAT3.cAug10	uc003fjg.2,uc003fji.2,uc010hxa.2	1.45106	0.131574
7:24882032:+,7:24888688:+	1.17313	1.55195	5.74164	6.13875e-07	1.15889e-05	5.96379	OSBPL3	core	NM_015550,NM_145320	ENST00000313367,ENST00000352860,ENST00000396431,ENST00000409452,ENST00000409863,ENST00000461835	OSBPL3.aAug10,OSBPL3.bAug10,OSBPL3.eAug10,OSBPL3.fAug10,OSBPL3.oAug10	uc003sxd.2,uc003sxe.2,uc003sxf.2,uc003sxh.2	1.34571	-0.172583
12:42862631:+,12:42863252:+	1.18508	1.26532	5.73832	6.21049e-07	1.17023e-05	5.94669	PRICKLE1	core	NM_001144881,NM_001144882,NM_001144883,NM_153026	ENST00000345127,ENST00000445766,ENST00000455697,ENST00000548696,ENST00000552108,ENST00000552240	PRICKLE1.aAug10,PRICKLE1.bAug10,PRICKLE1.cAug10,PRICKLE1.dAug10,PRICKLE1.fAug10	uc001rnl.2,uc001rnm.2,uc010skv.1,uc010skw.1	1.51598	-0.330894
3:186756661:+,3:186760442:+	1.04083	2.13503	5.73692	6.24103e-07	1.17533e-05	5.95223	ST6GAL1	core	NM_003032,NM_173216	ENST00000169298,ENST00000416235,ENST00000417392,ENST00000423451,ENST00000430309,ENST00000438590,ENST00000440338,ENST00000446170,ENST00000448044,ENST00000448408	ST6GAL1.aAug10,ST6GAL1.bAug10,ST6GAL1.cAug10,ST6GAL1.dAug10,ST6GAL1.eAug10,ST6GAL1.fAug10,ST6GAL1.oAug10,ST6GAL1.rAug10,ST6GAL1.uAug10,ST6GAL1.vaAug10,ST6GAL1.vcAug10	uc003frb.2,uc003frd.2	1.40289	-0.362058
12:19496368:+,12:19498776:+	1.3141	1.30673	5.73487	6.28611e-07	1.1827e-05	5.90997	PLEKHA5	core	NM_001143821,NM_019012	ENST00000299275,ENST00000317589,ENST00000355397,ENST00000429027,ENST00000536974,ENST00000538714,ENST00000539256,ENST00000543806	PLEKHA5.bAug10,PLEKHA5.cAug10,PLEKHA5.eAug10,PLEKHA5.fAug10,PLEKHA5.gAug10,PLEKHA5.hAug10	uc001rea.2,uc001reb.2,uc001rec.1,uc009zin.2,uc010sig.1,uc010sih.1	1.25147	0.0626352
10:121184597:+,10:121189887:+	1.45201	0.778677	5.73049	6.38335e-07	1.19965e-05	5.82818	GRK5	core	NM_005308	ENST00000369108,ENST00000392870,ENST00000457057	GRK5.aAug10,GRK5.bAug10,GRK5.cAug10,GRK5.dAug10	uc001led.2,uc009xzh.2,uc010qta.1	1.59445	-0.142437
2:202285429:+,2:202316073:+	1.14679	1.3807	5.72945	6.40669e-07	1.20358e-05	5.92911	TRAK2	core	NM_015049	ENST00000332624,ENST00000430254,ENST00000451703,ENST00000542292	TRAK2andALS2CR12.aAug10,TRAK2andALS2CR12.fAug10,TRAK2andALS2CR12.nAug10,TRAK2andALS2CR12.qAug10	uc002uyb.3,uc002uyc.2	1.09976	0.047027
2:191818352:+,2:191819310:+	1.26832	1.92823	5.72738	6.45314e-07	1.21104e-05	5.8953	GLS	core	NM_014905	ENST00000320717,ENST00000409428,ENST00000412247,ENST00000457316	GLS.aAug10,GLS.cAug10,GLS.dAug10,GLS.gAug10,GLS.jAug10,GLS.pAug10	uc002usf.2,uc002ush.2,uc010zgi.1,uc010zgj.1	0.357877	0.910446
16:426455:+,16:426544:+	1.40672	0.909103	5.72622	6.47936e-07	1.21496e-05	5.81034	TMEM8A	core	NM_021259	ENST00000250930,ENST00000382942,ENST00000431232	TMEM8A.aAug10,TMEM8A.bAug10	uc002cgu.3,uc002cgv.3	1.50184	-0.0951195
11:118981878:+,11:118981973:+	1.01606	2.20911	5.72378	6.53505e-07	1.22449e-05	5.90831	C2CD2L	core	NM_014807	ENST00000336702,ENST00000525598,ENST00000528586,ENST00000529874	C2CD2L.aAug10,C2CD2L.bAug10,C2CD2L.cAug10,C2CD2L.dAug10,C2CD2L.eAug10	uc001pvn.2,uc001pvo.2	1.13942	-0.123353
15:74501875:+,15:74504487:+	2.13557	0.0453097	5.72139	6.58992e-07	1.23292e-05	5.22818	STRA6	extended	None	ENST00000558645,ENST00000560148,ENST00000561332	mokama.cAug10,mokama.dAug10,mokama.eAug10	None	1.03787	1.0977
11:67235061:+,11:67235499:+	1.75892	0.530231	5.719	6.64543e-07	1.24122e-05	5.58576	TMEM134	core	NM_001078650,NM_025124	ENST00000308022,ENST00000393877,ENST00000536773,ENST00000537601,ENST00000541598,ENST00000545682	TMEM134.aAug10,TMEM134.cAug10,TMEM134.dAug10,TMEM134.eAug10,TMEM134.hAug10,TMEM134.iAug10,TMEM134.mAug10	uc001olq.1,uc001olr.1,uc001ols.1,uc001olt.1,uc009yrx.2	1.85887	-0.0999442
7:35673461:+,7:35673922:+	1.5635	1.17264	5.71125	6.82805e-07	1.27036e-05	5.70901	HERPUD2	core	NM_022373	ENST00000311350,ENST00000396081	HERPUD2.aAug10,HERPUD2.bAug10,HERPUD2.cAug10,HERPUD2.hAug10,HERPUD2.iAug10	uc003tes.3,uc003tet.2	1.27683	0.286667
5:24491936:+,5:24492926:+	1.53428	0.390262	5.70939	6.8727e-07	1.27796e-05	5.67693	CDH10	core	NM_006727	ENST00000264463,ENST00000502921,ENST00000503958,ENST00000510477	CDH10.aAug10,CDH10.bAug10,CDH10.cAug10,CDH10.dAug10,CDH10.eAug10	uc003jgr.1,uc011cnu.1	1.50966	0.024619
6:30866084:+,6:30866665:+	1.49619	0.96221	5.70821	6.90128e-07	1.28206e-05	5.70079	DDR1	core	NM_001202521,NM_001202522,NM_001202523,NM_001954,NM_013993,NM_013994	ENST00000324771,ENST00000376567,ENST00000376568,ENST00000376569,ENST00000376570,ENST00000376575,ENST00000418800,ENST00000446312,ENST00000452441,ENST00000454612,ENST00000482873,ENST00000484556,ENST00000508312,ENST00000513240	DDR1.aAug10,DDR1.bAug10,DDR1.cAug10,DDR1.dAug10,DDR1.eAug10,DDR1.fAug10,DDR1.gAug10,DDR1.hAug10,DDR1.iAug10,DDR1.jAug10,DDR1.kAug10,DDR1.lAug10,DDR1.nAug10,DDR1.vlAug10	uc003nrq.2,uc003nrr.2,uc003nrs.2,uc003nrt.2,uc003nru.2,uc003nrv.2,uc003nrz.1,uc010jse.2,uc011dms.1	0.945105	0.551087
X:135770150:+,X:135772769:+	1.16019	1.44732	5.70248	7.04091e-07	1.3044e-05	5.83132	ARHGEF6	core	NM_004840	ENST00000250617,ENST00000370620,ENST00000370622,ENST00000535227,ENST00000535736	ARHGEF6.aAug10,ARHGEF6.bAug10,ARHGEF6.cAug10,ARHGEF6.dAug10,ARHGEF6.eAug10,ARHGEF6.jAug10	uc004fab.2,uc011mwd.1,uc011mwe.1	0.893881	0.266306
7:111381717:+,7:111382069:+	1.86813	-0.0816434	5.69977	7.10809e-07	1.31441e-05	5.3717	DOCK4	core	NM_014705	ENST00000342288,ENST00000352877,ENST00000423057,ENST00000428084,ENST00000437633,ENST00000445943,ENST00000494651	DOCK4.aAug10,DOCK4.bAug10,DOCK4.cAug10,DOCK4.eAug10,DOCK4.fAug10	uc003vfw.2,uc003vfx.2,uc003vfy.2,uc011kml.1,uc011kmm.1	1.92237	-0.054241
2:120849237:+,2:120850825:+	1.15659	1.42938	5.69825	7.14607e-07	1.32071e-05	5.81927	EPB41L5	core	NM_001184937,NM_001184938,NM_001184939,NM_020909	ENST00000263713,ENST00000331393,ENST00000443124,ENST00000443902,ENST00000452780,ENST00000461128,ENST00000489017	EPB41L5.aAug10,EPB41L5.bAug10,EPB41L5.cAug10,EPB41L5.dAug10,EPB41L5.eAug10,EPB41L5.fAug10,EPB41L5.gAug10,EPB41L5.iAug10	uc002tmg.2,uc002tmh.3,uc010flk.2,uc010fll.2,uc010flm.2	0.800093	0.3565
4:148453856:+,4:148457029:+	1.38763	0.534457	5.69376	7.25927e-07	1.33866e-05	5.71696	EDNRA	core	NM_001256283,NM_001957,NR_028596	ENST00000324300,ENST00000339690,ENST00000503721,ENST00000511804	EDNRA.aAug10,EDNRA.cAug10	uc003iky.2,uc011cid.1	1.78243	-0.394803
21:40182030:+,21:40184927:+	1.31345	1.25937	5.68595	7.46019e-07	1.37093e-05	5.7479	ETS2	core	NM_001256295,NM_005239	ENST00000360214,ENST00000360938,ENST00000432278,ENST00000456966	ETS2.aAug10,ETS2.bAug10,ETS2.cAug10,ETS2.dAug10,ETS2.eAug10,ETS2.fAug10,ETS2.gAug10,ETS2.hAug10	uc002yxf.2,uc002yxg.2	1.78155	-0.468101
17:4844452:+,17:4845636:+	1.17507	1.56342	5.68268	7.54622e-07	1.38521e-05	5.77021	RNF167	core	NM_015528	ENST00000262482	RNF167.aAug10,RNF167.bAug10,RNF167.cAug10,RNF167.dAug10,RNF167.eAug10,RNF167.fAug10,RNF167.gAug10,RNF167.hAug10,RNF167.iAug10,RNF167.jAug10,RNF167.lAug10,RNF167.mAug10,RNF167.pAug10	uc002fzq.2,uc002fzr.2,uc002fzs.2,uc002fzt.2,uc002fzu.2,uc002fzv.2,uc002fzw.1,uc002fzx.2	0.859141	0.315927
X:73500329:+,X:73500766:+	1.79425	0.63059	5.68055	7.60258e-07	1.39428e-05	5.42758	NCRNA00182	core	NR_028379	ENST00000418855,ENST00000429124,ENST00000430772,ENST00000455395	NCRNA00182.bAug10,NCRNA00182.cAug10,NCRNA00182.dAug10,NCRNA00182.eAug10,NCRNA00182.gAug10,NCRNA00182.hAug10,NCRNA00182.jAug10,NCRNA00182.kAug10,NCRNA00182.lAug10	uc004ebr.1,uc010nlq.1	1.4876	0.306646
11:47193351:+,11:47193832:+	1.21341	1.59337	5.67782	7.6755e-07	1.40534e-05	5.73444	ARFGAP2	core	NM_001242832,NM_032389	ENST00000395449,ENST00000419701,ENST00000524782,ENST00000525314,ENST00000525398,ENST00000529455,ENST00000531750,ENST00000532438,ENST00000532478	PACSIN3andARFGAP2.aAug10,PACSIN3andARFGAP2.bAug10,PACSIN3andARFGAP2.cAug10,PACSIN3andARFGAP2.dAug10,PACSIN3andARFGAP2.iAug10,PACSIN3andARFGAP2.jAug10,PACSIN3andARFGAP2.lAug10,PACSIN3andARFGAP2.pAug10,PACSIN3andARFGAP2.tAug10,PACSIN3andARFGAP2.viAug10,PACSIN3andARFGAP2.vmAug10,PACSIN3andARFGAP2.vuAug10,PACSIN3andARFGAP2.vwAug10,PACSIN3andARFGAP2.vyAug10	uc001ndt.2,uc010rha.1,uc010rhb.1	0.952578	0.260834
11:133792117:+,11:133792464:+	1.9387	0.535232	5.67369	7.78714e-07	1.42186e-05	5.23665	IGSF9B	core	NM_014987	ENST00000321016,ENST00000533871	IGSF9B.aAug10	uc001qgx.3	0.920494	1.01821
11:67235563:+,11:67236490:+	1.86868	0.231635	5.67362	7.78903e-07	1.42186e-05	5.29205	TMEM134	core	NM_001078650,NM_001078651,NM_025124	ENST00000308022,ENST00000393877,ENST00000452789,ENST00000501408,ENST00000535585,ENST00000536020,ENST00000536773,ENST00000538561,ENST00000540133,ENST00000541598,ENST00000544903,ENST00000545682	TMEM134.aAug10,TMEM134.cAug10,TMEM134.dAug10,TMEM134.eAug10,TMEM134.fAug10,TMEM134.gAug10,TMEM134.hAug10,TMEM134.jAug10,TMEM134.lAug10,TMEM134.mAug10,TMEM134.oAug10,TMEM134.pAug10,TMEM134.qAug10,TMEM134.tAug10,TMEM134.vaAug10,TMEM134.vbAug10,TMEM134.vcAug10,TMEM134.vdAug10,TMEM134.veAug10,TMEM134.vfAug10	uc001olp.1,uc001olq.1,uc001olr.1,uc001ols.1,uc001olt.1,uc001olu.3,uc009yrx.2,uc010rpt.1,uc010rpu.1	1.85887	0.00981674
5:24511623:+,5:24535221:+	1.86103	0.0187109	5.67307	7.80423e-07	1.42397e-05	5.29236	CDH10	core	NM_006727	ENST00000264463,ENST00000510477	CDH10.aAug10,CDH10.bAug10	uc003jgr.1,uc011cnu.1	1.50966	0.351367
1:210412953:+,1:210419145:+	2.09765	-0.584069	5.67214	7.82947e-07	1.42818e-05	5.06309	SERTAD4	extended	None	ENST00000482421	SERTAD4.dAug10	None	0.581197	1.51645
16:15661913:+,16:15675074:+	1.31997	1.28913	5.6666	7.98265e-07	1.45342e-05	5.68516	C16orf45	core	NM_001142469,NM_033201	ENST00000300006,ENST00000452191	C16orf45.aAug10,C16orf45.bAug10,C16orf45.cAug10,C16orf45.dAug10,C16orf45.eAug10,C16orf45.fAug10,C16orf45.gAug10,C16orf45.hAug10	uc002ddo.2,uc002ddp.2	1.03142	0.288543
9:135158800:+,9:135161810:+	1.00146	1.84121	5.66505	8.02603e-07	1.45968e-05	5.71736	SETX	core	NM_015046	ENST00000224140,ENST00000372169,ENST00000393220,ENST00000436441,ENST00000474172	SETX.aAug10,SETX.bAug10,SETX.cAug10,SETX.jAug10	uc004cbj.2,uc004cbk.2,uc010mzt.2	0.671835	0.329628
20:23358123:+,20:23360082:+	1.20083	1.36666	5.65953	8.18257e-07	1.48355e-05	5.67345	NAPB	core	NM_022080	ENST00000377026,ENST00000398425,ENST00000431864,ENST00000432543	NAPB.aAug10,NAPB.bAug10,NAPB.cAug10,NAPB.dAug10,NAPB.eAug10,NAPB.fAug10,NAPB.nAug10,NAPB.oAug10,NAPB.rAug10,NAPB.sAug10	uc002wta.2,uc002wtb.2,uc002wtc.2,uc002wtd.3,uc010zss.1,uc010zst.1	1.24026	-0.0394263
16:65005967:+,16:65006807:+	1.24187	1.18533	5.65399	8.34245e-07	1.50844e-05	5.66485	CDH11	core	NM_001797	ENST00000268603,ENST00000394156,ENST00000538390	CDH11.aAug10,CDH11.bAug10,CDH11.cAug10	uc002eoi.2,uc002eoj.2,uc010vin.1	1.22347	0.0184034
7:111535774:+,7:111540430:+	1.55847	0.663545	5.65289	8.37456e-07	1.51261e-05	5.49302	DOCK4	core	NM_014705	ENST00000342288,ENST00000352877,ENST00000428084,ENST00000437633,ENST00000445943,ENST00000476846,ENST00000544250	DOCK4.aAug10,DOCK4.bAug10,DOCK4.dAug10	uc003vfx.2,uc003vfy.2,uc003vga.1	1.92237	-0.363905
10:121212788:+,10:121214481:+	1.41262	0.666192	5.65152	8.41477e-07	1.51851e-05	5.55749	GRK5	core	NM_005308	ENST00000369108,ENST00000392870,ENST00000457057	GRK5.aAug10,GRK5.bAug10,GRK5.cAug10,GRK5.iAug10	uc001led.2,uc009xzh.2	1.59445	-0.181826
22:41075738:+,22:41076953:+	1.71396	0.249871	5.6501	8.45686e-07	1.525e-05	5.3693	MCHR1	core	NM_005297	ENST00000249016,ENST00000381433	MCHR1.aAug10,MCHR1.cAug10	uc003ayz.2	1.71284	0.00111482
11:67232167:+,11:67232274:+	1.58485	0.624488	5.64309	8.66634e-07	1.55773e-05	5.42352	TMEM134	core	NM_001078650,NM_001078651,NM_025124	ENST00000308022,ENST00000393877,ENST00000535175,ENST00000536020,ENST00000537601,ENST00000541059,ENST00000545682	TMEM134.bAug10,TMEM134.cAug10,TMEM134.eAug10,TMEM134.fAug10,TMEM134.hAug10,TMEM134.iAug10,TMEM134.oAug10,TMEM134.rAug10,TMEM134.sAug10,TMEM134.uAug10,TMEM134.vaAug10,TMEM134.vcAug10,TMEM134.veAug10,TMEM134.vfAug10	uc001olp.1,uc001olq.1,uc001olr.1,uc001ols.1	1.85887	-0.274016
2:167108395:+,2:167128909:+	2.47975	-0.129792	5.64244	8.68609e-07	1.56044e-05	4.64954	SCN9A	core	NM_002977	ENST00000303354,ENST00000375387,ENST00000409435,ENST00000409672	SCN9A.aAug10	uc010fpl.2	1.86614	0.613613
20:33867921:+,20:33871979:+	1.03744	1.72526	5.63984	8.76538e-07	1.57328e-05	5.63465	EIF6	core	NM_181466	ENST00000374443,ENST00000447927,ENST00000462894	EIF6andEDEM2.uAug10,EIF6andEDEM2.vfAug10,EIF6andEDEM2.vgAug10,EIF6andEDEM2.vrAug10	uc002xby.1,uc002xbz.1	0.527929	0.509512
7:111575683:+,7:111580165:+	1.48245	0.915401	5.6395	8.77596e-07	1.57455e-05	5.56265	DOCK4	core	NM_014705	ENST00000342288,ENST00000352877,ENST00000428084,ENST00000437633,ENST00000445943,ENST00000476846,ENST00000544250	DOCK4.aAug10,DOCK4.bAug10,DOCK4.dAug10,DOCK4.gAug10	uc003vfx.2,uc003vfy.2,uc010ljt.1	1.92237	-0.439919
10:121189950:+,10:121190899:+	1.59534	0.591815	5.63741	8.84021e-07	1.58359e-05	5.48916	GRK5	core	NM_005308	ENST00000369108,ENST00000392870,ENST00000457057	GRK5.aAug10,GRK5.bAug10,GRK5.cAug10,GRK5.dAug10	uc001led.2,uc009xzh.2,uc010qta.1	1.59445	0.000891954
2:202698694:+,2:202700366:+	1.72066	-0.373259	5.63714	8.84856e-07	1.58452e-05	5.31901	CDK15	core	NM_139158	ENST00000260967,ENST00000374598,ENST00000410091,ENST00000434439,ENST00000450471,ENST00000451080,ENST00000488419	CDK15.aAug10,CDK15.bAug10,CDK15.cAug10,CDK15.dAug10,CDK15.eAug10,CDK15.fAug10,CDK15.gAug10,CDK15.hAug10	uc002uys.2,uc002uyt.2,uc010ftm.2,uc010ftn.1,uc010fto.1	1.61332	0.107344
5:146077707:+,5:146080608:+	1.51144	1.49594	5.63342	8.9642e-07	1.60151e-05	5.47973	PPP2R2B	core	NM_001127381,NM_004576,NM_181674,NM_181675,NM_181676,NM_181677,NM_181678	ENST00000336640,ENST00000356826,ENST00000394409,ENST00000394410,ENST00000394411,ENST00000394413,ENST00000394414,ENST00000453001,ENST00000502876,ENST00000504198,ENST00000508267,ENST00000508545,ENST00000512011,ENST00000512639,ENST00000515880,ENST00000528601,ENST00000530902,ENST00000532154	PPP2R2B.aAug10,PPP2R2B.bAug10,PPP2R2B.cAug10,PPP2R2B.dAug10,PPP2R2B.eAug10,PPP2R2B.fAug10,PPP2R2B.gAug10,PPP2R2B.hAug10,PPP2R2B.iAug10,PPP2R2B.jAug10,PPP2R2B.kAug10,PPP2R2B.lAug10,PPP2R2B.mAug10,PPP2R2B.oAug10,PPP2R2B.pAug10,PPP2R2B.qAug10,PPP2R2B.rAug10,PPP2R2B.vdAug10,PPP2R2B.vgAug10,PPP2R2B.vkAug10,PPP2R2B.vlAug10,PPP2R2B.vmAug10,PPP2R2B.vnAug10,PPP2R2B.vpAug10,PPP2R2B.vrAug10,PPP2R2B.vsAug10,…	uc003loe.2,uc003lof.3,uc003log.3,uc003loh.3,uc003loi.3,uc003loj.3,uc003lok.3,uc010jgm.2,uc011dbu.1,uc011dbv.1	1.87928	-0.367845
15:74477396:+,15:74477652:+	1.74382	0.323026	5.63094	9.04218e-07	1.61343e-05	5.31721	STRA6	extended	None	None	STRA6.oAug10	None	1.03787	0.705942
3:37514951:+,3:37522975:+	1.03042	1.25754	5.62706	9.16566e-07	1.63314e-05	5.59296	ITGA9	core	NM_002207	ENST00000264741,ENST00000422441	ITGA9.aAug10,ITGA9.bAug10	uc003chc.2,uc003chd.2	0.618459	0.411959
6:145149991:+,6:145156916:+	1.09334	1.39022	5.62678	9.1747e-07	1.63417e-05	5.59171	UTRN	core	NM_007124	ENST00000367526,ENST00000367545,ENST00000417142,ENST00000455022,ENST00000545166	UTRN.aAug10,UTRN.cAug10,UTRN.dAug10,UTRN.eAug10,UTRN.hAug10,UTRN.iAug10,UTRN.pAug10	uc003qkt.2	0.847478	0.245861
7:55469013:+,7:55479600:+	1.16097	1.72599	5.62035	9.38304e-07	1.66654e-05	5.55963	LANCL2	core	NM_018697	ENST00000254770,ENST00000452107	LANCL2.aAug10	uc003tqp.2	0.804063	0.356906
1:153751687:+,1:153751819:+	1.52064	0.878818	5.61522	9.55277e-07	1.69069e-05	5.39714	SLC27A3	core	NM_024330	ENST00000271857,ENST00000368660,ENST00000368661,ENST00000458027,ENST00000468044,ENST00000484014,ENST00000524676,ENST00000532853	SLC27A3.aAug10,SLC27A3.bAug10,SLC27A3.dAug10,SLC27A3.eAug10,SLC27A3.gAug10	uc001fcz.2,uc009won.2	1.62818	-0.107542
19:40722179:+,19:40723094:+	2.89258	-0.70236	5.61444	9.57869e-07	1.69408e-05	3.99915	TTC9B	core	NM_152479	ENST00000311308	TTC9B.aAug10	uc002onc.2	2.89042	0.00215379
13:58240967:+,13:58298746:+	1.13442	1.14686	5.6121	9.65744e-07	1.706e-05	5.53893	PCDH17	core	NM_001040429	ENST00000377918,ENST00000484979	PCDH17.aAug10	uc001vhq.1,uc001vhr.1,uc010aec.1	0.956046	0.178371
10:20506505:+,10:20507993:+	2.08145	-0.0943787	5.60674	9.83958e-07	1.73289e-05	4.88238	PLXDC2	core	NM_032812	ENST00000377238,ENST00000377242,ENST00000377252,ENST00000536022	PLXDC2.aAug10,PLXDC2.bAug10,PLXDC2.cAug10,PLXDC2.dAug10,PLXDC2.eAug10	uc001iqg.1,uc001iqh.1,uc009xkc.1	2.22435	-0.142895
11:21592486:+,11:21594731:+	1.39408	0.145489	5.60494	9.90165e-07	1.74321e-05	5.41469	NELL1	core	NM_006157,NM_201551	ENST00000298925,ENST00000325319,ENST00000357134,ENST00000529218,ENST00000532434	NELL1.aAug10,NELL1.bAug10,NELL1.cAug10,NELL1.dAug10,NELL1.eAug10	uc001mqe.2,uc001mqf.2,uc001mqh.2,uc009yid.2,uc010rdo.1,uc010rdp.1	1.41287	-0.0187825
2:167094777:+,2:167099012:+	3.65741	-1.16033	5.59791	1.01477e-06	1.77933e-05	3.05637	SCN9A	core	NM_002977	ENST00000303354,ENST00000375387,ENST00000409435,ENST00000409672	SCN9A.aAug10	uc010fpl.2	1.86614	1.79127
12:19285384:+,12:19406874:+	1.75504	0.740876	5.59724	1.01716e-06	1.78259e-05	5.25964	PLEKHA5	core	NM_001143821,NM_019012	ENST00000299275,ENST00000309364,ENST00000317589,ENST00000355397,ENST00000359180,ENST00000412219,ENST00000429027,ENST00000538034,ENST00000538714,ENST00000539256,ENST00000542828	PLEKHA5.aAug10,PLEKHA5.bAug10,PLEKHA5.cAug10,PLEKHA5.gAug10,PLEKHA5.mAug10	uc001rea.2,uc001reb.2,uc009zin.2,uc010sie.1	1.25147	0.503571
10:99510227:+,10:99511148:+	1.10475	1.78551	5.59358	1.03022e-06	1.80108e-05	5.47941	ZFYVE27	core	NM_001002262,NM_001174119,NM_001174120,NM_001174122,NM_144588	ENST00000337540,ENST00000357540,ENST00000359980,ENST00000370613,ENST00000393677,ENST00000453958	ZFYVE27.aAug10,ZFYVE27.cAug10,ZFYVE27.dAug10,ZFYVE27.eAug10,ZFYVE27.fAug10,ZFYVE27.gAug10,ZFYVE27.hAug10,ZFYVE27.iAug10,ZFYVE27.jAug10,ZFYVE27.lAug10,ZFYVE27.nAug10,ZFYVE27.oAug10,ZFYVE27.pAug10	uc001kol.1,uc001kom.1,uc001koo.2,uc001kop.2,uc001koq.2,uc010qpa.1,uc010qpc.1,uc010qpd.1	1.19552	-0.0907694
11:21392494:+,11:21581735:+	1.74054	-0.257323	5.58578	1.05867e-06	1.84373e-05	5.13766	NELL1	core	NM_201551	ENST00000532434	NELL1.cAug10	uc001mqf.2,uc010rdp.1	1.41287	0.327675
9:115456513:+,9:115478741:+	1.12197	1.58001	5.58228	1.07164e-06	1.86244e-05	5.44184	C9orf80	core	NM_021218	ENST00000374238,ENST00000374242,ENST00000476599	C9orf80.bAug10,C9orf80.dAug10,C9orf80.kAug10	uc004bgg.2,uc010muk.2	1.14703	-0.0250594
5:161292794:+,5:161300123:+	1.97426	-0.438605	5.57436	1.10167e-06	1.90966e-05	4.89931	GABRA1	core	NM_000806,NM_001127643,NM_001127644,NM_001127645,NM_001127646,NM_001127647,NM_001127648	ENST00000023897,ENST00000393943,ENST00000420560,ENST00000428797,ENST00000437025,ENST00000444819,ENST00000519621	GABRA1.aAug10,GABRA1.bAug10,GABRA1.cAug10,GABRA1.dAug10,GABRA1.eAug10,GABRA1.fAug10,GABRA1.gAug10,GABRA1.hAug10	uc003lyx.3,uc010jiw.2,uc010jix.2,uc010jiy.2,uc010jiz.2,uc010jja.2,uc010jjb.2	1.9971	-0.0228474
16:424892:+,16:425133:+	1.39993	0.871303	5.56444	1.14047e-06	1.96603e-05	5.28743	TMEM8A	core	NM_021259	ENST00000250930,ENST00000382942,ENST00000431232,ENST00000448854,ENST00000475348	TMEM8A.aAug10,TMEM8A.bAug10,TMEM8A.cAug10,TMEM8A.dAug10,TMEM8A.eAug10	uc002cgu.3,uc002cgv.3	1.50184	-0.101915
1:16103782:+,1:16111043:+	4.36414	-1.19866	5.56096	1.1544e-06	1.98699e-05	2.18772	FBLIM1	core	NM_001024216,NM_017556	ENST00000332305,ENST00000375766,ENST00000375771,ENST00000400773,ENST00000509138,ENST00000514156	FBLIM1.bAug10,FBLIM1.cAug10,FBLIM1.dAug10,FBLIM1.eAug10,FBLIM1.fAug10,FBLIM1.hAug10,FBLIM1.iAug10	uc001axd.1,uc001axe.1,uc001axf.2,uc001axh.1,uc001axi.1	2.85046	1.51368
12:19506936:+,12:19511162:+	1.12237	1.54291	5.55959	1.15991e-06	1.9951e-05	5.36981	PLEKHA5	core	NM_001143821,NM_019012	ENST00000299275,ENST00000317589,ENST00000355397,ENST00000359180,ENST00000424268,ENST00000429027,ENST00000536974,ENST00000538714,ENST00000538972,ENST00000539256,ENST00000542828,ENST00000543806	PLEKHA5.aAug10,PLEKHA5.bAug10,PLEKHA5.cAug10,PLEKHA5.dAug10,PLEKHA5.eAug10,PLEKHA5.fAug10,PLEKHA5.gAug10,PLEKHA5.hAug10,PLEKHA5.jAug10,PLEKHA5.oAug10	uc001rea.2,uc001reb.2,uc001rec.1,uc009zin.2,uc009zio.2,uc010sie.1,uc010sif.1,uc010sig.1,uc010sih.1	1.25147	-0.129097
2:167159812:+,2:167160748:+	2.21651	-0.187489	5.55884	1.16295e-06	1.99999e-05	4.6134	SCN9A	core	NM_002977	ENST00000303354,ENST00000409435,ENST00000409672,ENST00000472119	SCN9A.aAug10,SCN9A.cAug10,SCN9A.fAug10	uc002udr.1,uc010fpl.2	1.86614	0.350373
17:40610981:+,17:40612866:+	1.00163	1.93882	5.55802	1.1663e-06	2.00504e-05	5.3639	ATP6V0A1	core	NM_001130020,NM_001130021,NM_005177	ENST00000264649,ENST00000343619,ENST00000393829,ENST00000537728,ENST00000544137,ENST00000546249	ATP6V0A1.aAug10,ATP6V0A1.bAug10,ATP6V0A1.cAug10,ATP6V0A1.dAug10,ATP6V0A1.eAug10,ATP6V0A1.fAug10,ATP6V0A1.gAug10,ATP6V0A1.hAug10,ATP6V0A1.jAug10,ATP6V0A1.kAug10,ATP6V0A1.mAug10,ATP6V0A1.pAug10,ATP6V0A1.tAug10,ATP6V0A1.uAug10,ATP6V0A1.vhAug10,ATP6V0A1.viAug10,ATP6V0A1.vlAug10	uc002hzp.1,uc002hzq.2,uc002hzr.2,uc002hzs.2,uc010cyg.2,uc010wgj.1,uc010wgk.1	0.961028	0.0405981
11:26620545:+,11:26621097:+	4.407	-2.04772	5.54674	1.21306e-06	2.07228e-05	2.18384	ANO3	core	NM_031418	ENST00000256737,ENST00000525139,ENST00000531568,ENST00000537978,ENST00000538001	ANO3.aAug10,ANO3.bAug10,ANO3.cAug10	uc001mqt.3,uc010rdr.1,uc010rds.1,uc010rdt.1	5.45906	-1.05206
6:56963939:+,6:56965401:+	1.11396	1.41859	5.54557	1.21801e-06	2.07933e-05	5.31903	ZNF451	extended	None	ENST00000370708,ENST00000508603,ENST00000510989	KIAA1586andZNF451.hAug10,KIAA1586andZNF451.iAug10,KIAA1586andZNF451.rAug10,KIAA1586andZNF451.vnAug10	uc003pdo.2,uc011dxn.1	-0.321136	1.4351
3:178743013:+,3:178745211:+	1.8993	0.381902	5.53754	1.25256e-06	2.12996e-05	4.81011	ZMAT3	core	NM_152240	ENST00000432729	ZMAT3.cAug10	uc003fji.2,uc010hxa.2	1.45106	0.448243
12:19427917:+,12:19436214:+	1.17491	1.46754	5.53648	1.25719e-06	2.13567e-05	5.28721	PLEKHA5	core	NM_001143821,NM_019012	ENST00000299275,ENST00000309364,ENST00000317589,ENST00000355397,ENST00000359180,ENST00000424268,ENST00000429027,ENST00000510738,ENST00000536974,ENST00000538714,ENST00000539256,ENST00000542828,ENST00000543806	PLEKHA5.aAug10,PLEKHA5.bAug10,PLEKHA5.cAug10,PLEKHA5.dAug10,PLEKHA5.eAug10,PLEKHA5.fAug10,PLEKHA5.gAug10,PLEKHA5.hAug10,PLEKHA5.iAug10,PLEKHA5.lAug10	uc001rea.2,uc001reb.2,uc001rec.1,uc009zin.2,uc010sie.1,uc010sif.1,uc010sig.1,uc010sih.1	1.25147	-0.0765552
17:29113049:+,17:29119458:+	1.63388	0.707701	5.53563	1.26093e-06	2.14165e-05	5.06862	CRLF3	core	NM_015986	ENST00000324238,ENST00000544695	CRLF3.aAug10,CRLF3.bAug10	uc002hfr.3,uc010wbr.1	1.5748	0.0590849
7:24880402:+,7:24881898:+	1.16643	1.37375	5.52971	1.28719e-06	2.18035e-05	5.25761	OSBPL3	core	NM_015550,NM_145320,NM_145321,NM_145322	ENST00000313367,ENST00000352860,ENST00000353930,ENST00000396429,ENST00000396431,ENST00000409069,ENST00000409452,ENST00000409555,ENST00000409759,ENST00000409863,ENST00000431825	OSBPL3.aAug10,OSBPL3.bAug10,OSBPL3.cAug10,OSBPL3.dAug10,OSBPL3.eAug10,OSBPL3.fAug10,OSBPL3.gAug10,OSBPL3.hAug10	uc003sxd.2,uc003sxe.2,uc003sxf.2,uc003sxg.2,uc003sxh.2,uc003sxi.2,uc003sxj.1,uc003sxk.1	1.34571	-0.179285
12:19283064:+,12:19285327:+	1.63459	0.646868	5.52791	1.29531e-06	2.19189e-05	5.04705	PLEKHA5	core	NM_001143821,NM_001190860,NM_019012	ENST00000299275,ENST00000309364,ENST00000317589,ENST00000355397,ENST00000359180,ENST00000412219,ENST00000429027,ENST00000535357,ENST00000538714,ENST00000539256,ENST00000540972,ENST00000542828	PLEKHA5.aAug10,PLEKHA5.bAug10,PLEKHA5.cAug10,PLEKHA5.gAug10,PLEKHA5.pAug10,PLEKHA5.qAug10	uc001rdz.3,uc001rea.2,uc001reb.2,uc009zin.2,uc010sie.1	1.25147	0.383123
12:52449943:+,12:52450278:+	1.0276	1.5974	5.52267	1.31914e-06	2.22792e-05	5.24943	NR4A1	core	NM_001202233,NM_002135,NM_173157	ENST00000243050,ENST00000360284,ENST00000394824,ENST00000394825,ENST00000545748,ENST00000550082,ENST00000550339	NR4A1.aAug10,NR4A1.bAug10,NR4A1.cAug10,NR4A1.dAug10,NR4A1.eAug10,NR4A1.kAug10,NR4A1.oAug10	uc001rzs.2,uc001rzt.2,uc010sno.1	0.911448	0.11615
16:65038944:+,16:65087707:+	1.1808	1.35094	5.52251	1.31988e-06	2.22856e-05	5.23946	CDH11	core	NM_001797	ENST00000268603,ENST00000394156,ENST00000536902	None	uc002eoi.2,uc002eoj.2,uc010vio.1	1.22347	-0.0426742
11:118984422:+,11:118984565:+	1.37448	1.12557	5.52195	1.32245e-06	2.23177e-05	5.16005	C2CD2L	extended	None	ENST00000528586,ENST00000529874	C2CD2L.bAug10,C2CD2L.cAug10,C2CD2L.eAug10	uc001pvo.2	1.13942	0.235061
6:128320049:+,6:128326229:+	1.13516	1.19903	5.52139	1.32506e-06	2.23581e-05	5.2376	PTPRK	core	NM_001135648,NM_002844	ENST00000368213,ENST00000368215,ENST00000368226	PTPRK.bAug10,PTPRK.cAug10,PTPRK.dAug10	uc003qbj.2,uc003qbk.2,uc010kfc.2	0.555594	0.579562
3:186648623:+,3:186681573:+	1.53459	1.1154	5.51613	1.34956e-06	2.27218e-05	5.12266	ST6GAL1	core	NM_173216,NM_173217	ENST00000169298,ENST00000455441,ENST00000457772,ENST00000458216,ENST00000468614	ST6GAL1.eAug10,ST6GAL1.hAug10,ST6GAL1.lAug10,ST6GAL1.tAug10,ST6GAL1.vbAug10	uc003frb.2,uc003frc.2	1.40289	0.131708
11:20907086:+,11:20939728:+	1.38688	0.311959	5.51533	1.3533e-06	2.27733e-05	5.17996	NELL1	core	NM_006157,NM_201551	ENST00000298925,ENST00000325319,ENST00000357134,ENST00000527873,ENST00000529595,ENST00000532434	NELL1.aAug10,NELL1.bAug10,NELL1.cAug10,NELL1.dAug10,NELL1.fAug10,NELL1.jAug10	uc001mqe.2,uc001mqf.2,uc009yid.2,uc010rdo.1	1.41287	-0.0259845
2:100915412:+,2:100915688:+	2.43549	0.231072	5.50913	1.38285e-06	2.32043e-05	4.15598	LONRF2	core	NM_198461	ENST00000393437,ENST00000409647	LONRF2.aAug10,LONRF2.bAug10	uc002tal.3	1.76365	0.671836
3:131283193:+,3:131293915:+	2.18074	-0.339727	5.50875	1.38466e-06	2.32308e-05	4.47942	CPNE4	core	NM_130808	ENST00000429747,ENST00000502818,ENST00000511604,ENST00000512055,ENST00000512332,ENST00000515418	CPNE4.aAug10,CPNE4.bAug10,CPNE4.cAug10,CPNE4.dAug10	uc003eok.2,uc003eol.2,uc003eom.2,uc011blq.1	1.10288	1.07787
19:55814776:+,19:55815035:+	1.16659	0.870842	5.50398	1.40784e-06	2.35526e-05	5.18269	BRSK1	core	NM_032430	ENST00000309383,ENST00000326848,ENST00000543410	BRSK1.aAug10,BRSK1.bAug10,BRSK1.cAug10,BRSK1.eAug10	uc002qkf.2,uc002qkg.2,uc002qkh.2	0.913109	0.253479
5:137801757:+,5:137802446:+	2.79611	-0.704213	5.50333	1.41102e-06	2.3594e-05	3.70732	EGR1	core	NM_001964	ENST00000239938,ENST00000411801,ENST00000535792	EGR1.aAug10	uc003ldb.1,uc011cyu.1	2.79355	0.00255865
1:161275958:+,1:161276119:+	2.89715	-1.10588	5.48983	1.47889e-06	2.45853e-05	3.49716	MPZ	core	NM_000530	ENST00000336559,ENST00000360451,ENST00000463290,ENST00000476410,ENST00000491222,ENST00000526189,ENST00000533357	MPZ.aAug10,MPZ.bAug10,MPZ.cAug10,MPZ.dAug10,MPZ.fAug10	uc001gaf.3,uc010pko.1	2.89705	9.35304e-05
16:1815179:+,16:1815961:+	1.27932	1.59503	5.48977	1.47919e-06	2.45863e-05	5.12721	MAPK8IP3	core	NM_001040439,NM_015133	ENST00000250894,ENST00000356010	MAPK8IP3.aAug10,MAPK8IP3.bAug10,MAPK8IP3.cAug10	uc002cmk.2,uc002cml.2,uc010uvl.1	1.14252	0.136805
7:111512620:+,7:111517086:+	1.71051	0.371489	5.48735	1.49175e-06	2.47744e-05	4.87556	DOCK4	core	NM_014705	ENST00000342288,ENST00000352877,ENST00000423057,ENST00000428084,ENST00000437633,ENST00000445943,ENST00000476846,ENST00000544250	DOCK4.aAug10,DOCK4.bAug10,DOCK4.cAug10,DOCK4.dAug10	uc003vfw.2,uc003vfx.2,uc003vfy.2,uc003vga.1	1.92237	-0.211862
7:111584926:+,7:111585772:+	1.39312	0.814066	5.48048	1.52782e-06	2.52731e-05	5.02341	DOCK4	core	NM_014705	ENST00000342288,ENST00000352877,ENST00000428084,ENST00000437633,ENST00000445943,ENST00000476846,ENST00000544250	DOCK4.aAug10,DOCK4.bAug10,DOCK4.dAug10,DOCK4.gAug10	uc003vfx.2,uc003vfy.2,uc003vga.1,uc010ljt.1	1.92237	-0.529254
16:58534981:+,16:58537702:+	1.13949	1.1754	5.47841	1.53885e-06	2.54219e-05	5.0984	NDRG4	core	NM_001242833	ENST00000356752,ENST00000421602	NDRG4.dAug10,NDRG4.iAug10,NDRG4.kAug10,NDRG4.tAug10	uc010vig.1	1.2716	-0.132116
20:23360572:+,20:23361850:+	1.4753	0.818022	5.47688	1.54705e-06	2.55318e-05	4.96014	NAPB	core	NM_022080	ENST00000377026,ENST00000398425,ENST00000431864,ENST00000432543,ENST00000468128,ENST00000472855	NAPB.aAug10,NAPB.bAug10,NAPB.dAug10,NAPB.eAug10,NAPB.fAug10,NAPB.hAug10,NAPB.nAug10,NAPB.oAug10,NAPB.sAug10,NAPB.tAug10,NAPB.uAug10	uc002wta.2,uc002wtb.2,uc002wtc.2,uc002wtd.3,uc010zss.1,uc010zst.1	1.24026	0.235039
3:105423017:+,3:105438891:+	1.10499	1.37156	5.47684	1.54725e-06	2.55318e-05	5.09974	CBLB	core	NM_170662	ENST00000264122,ENST00000394027,ENST00000403724,ENST00000405772	CBLB.aAug10,CBLB.bAug10,CBLB.cAug10,CBLB.dAug10	uc003dwc.2,uc003dwd.1,uc003dwe.1,uc011bhi.1	0.651176	0.453816
11:95620848:+,11:95621320:+	1.08457	1.54364	5.47684	1.54728e-06	2.55318e-05	5.09819	MTMR2	core	NM_001243571	ENST00000409459,ENST00000469574,ENST00000470011,ENST00000472423,ENST00000481642,ENST00000497683	MTMR2.cAug10,MTMR2.dAug10,MTMR2.kAug10,MTMR2.lAug10,MTMR2.oAug10,MTMR2.qAug10,MTMR2.vaAug10,MTMR2.vbAug10,MTMR2.vdAug10,MTMR2.vfAug10	uc001pfv.2	0.596526	0.488047
16:57507407:+,16:57507529:+	1.00932	1.45964	5.47182	1.57448e-06	2.59209e-05	5.08404	DOK4	novel	NONE	NONE	NONE	NONE	0.906181	0.103134
7:111368776:+,7:111372282:+	1.85351	-0.00265449	5.45898	1.6464e-06	2.6928e-05	4.71042	DOCK4	core	NM_014705	ENST00000342288,ENST00000352877,ENST00000423057,ENST00000428084,ENST00000437633,ENST00000445943,ENST00000486186,ENST00000494651,ENST00000494769	DOCK4.aAug10,DOCK4.bAug10,DOCK4.cAug10,DOCK4.eAug10,DOCK4.fAug10,DOCK4.hAug10,DOCK4.mAug10	uc003vfv.2,uc003vfw.2,uc003vfx.2,uc003vfy.2,uc011kml.1,uc011kmm.1	1.92237	-0.0688683
17:19289777:+,17:19290073:+	1.94041	-0.705554	5.45802	1.65189e-06	2.7009e-05	4.67851	MFAP4	core	NM_001198695,NM_002404	ENST00000299610,ENST00000395592,ENST00000497081	MFAP4.aAug10,MFAP4.bAug10,MFAP4.cAug10,MFAP4.dAug10,MFAP4.eAug10,MFAP4.fAug10	uc002gvr.2,uc002gvs.2,uc002gvt.2	1.44721	0.493201
7:1195220:+,7:1197292:+	1.07092	1.58775	5.45354	1.67777e-06	2.73652e-05	5.02388	ZFAND2A	core	NM_182491	ENST00000316495,ENST00000397083,ENST00000401903	ZFAND2A.aAug10,ZFAND2A.bAug10,ZFAND2A.cAug10,ZFAND2A.eAug10,ZFAND2A.fAug10	uc003skc.2,uc003skd.3	1.29269	-0.221768
3:64644467:+,3:64666877:+	1.33975	0.597716	5.45296	1.68119e-06	2.7412e-05	4.96458	ADAMTS9	core	NM_182920	ENST00000295903,ENST00000459780,ENST00000475557,ENST00000482490,ENST00000498707	ADAMTS9.aAug10,ADAMTS9.bAug10,ADAMTS9.cAug10,ADAMTS9.dAug10,ADAMTS9.fAug10	uc003dmg.2,uc003dmh.1,uc003dmk.1,uc011bfo.1	0.901905	0.437843
3:131293974:+,3:131300423:+	1.88173	-0.094194	5.45054	1.69539e-06	2.76255e-05	4.57878	CPNE4	core	NM_130808	ENST00000429747,ENST00000502818,ENST00000511604,ENST00000512055,ENST00000512332,ENST00000515418	CPNE4.aAug10,CPNE4.bAug10,CPNE4.cAug10,CPNE4.dAug10	uc003eok.2,uc003eol.2,uc003eom.2,uc011blq.1	1.10288	0.77885
14:55309772:+,14:55310719:+	2.92237	-0.623586	5.44857	1.70704e-06	2.77929e-05	3.45401	GCH1	core	NM_001024024	ENST00000395514	GCH1.bAug10	uc001xbh.1	1.57802	1.34435
X:19024383:+,X:19025353:+	1.16655	0.719221	5.44592	1.72284e-06	2.80182e-05	4.98563	GPR64	core	NM_001079858,NM_001079859,NM_001079860,NM_001184833,NM_001184834,NM_001184835,NM_001184836,NM_001184837,NM_005756	ENST00000354791,ENST00000356606,ENST00000357544,ENST00000357991,ENST00000360279,ENST00000379869,ENST00000379873,ENST00000379876,ENST00000379878,ENST00000397917	GPR64.aAug10,GPR64.bAug10,GPR64.cAug10,GPR64.dAug10,GPR64.eAug10,GPR64.fAug10,GPR64.gAug10,GPR64.hAug10,GPR64.iAug10,GPR64.jAug10	uc004cyw.2,uc004cyx.2,uc004cyy.2,uc004cyz.2,uc004cza.2,uc004czb.2,uc004czc.2,uc004czd.2,uc004cze.2,uc004czf.2	1.29067	-0.124121
3:2924931:+,3:2928724:+	1.33881	0.821892	5.44584	1.72329e-06	2.8021e-05	4.93386	CNTN4	core	NM_001206955,NM_175607	ENST00000358480,ENST00000397461,ENST00000418658,ENST00000427331,ENST00000430505,ENST00000438282,ENST00000473058,ENST00000473173	CNTN4.aAug10,CNTN4.bAug10,CNTN4.cAug10,CNTN4.kAug10	uc003bpc.2,uc003bpd.1	1.06573	0.273085
16:1817298:+,16:1817565:+	1.48089	1.01019	5.44408	1.73388e-06	2.81247e-05	4.84193	MAPK8IP3	core	NM_001040439,NM_015133	ENST00000250894,ENST00000356010	MAPK8IP3.aAug10,MAPK8IP3.bAug10,MAPK8IP3.cAug10,MAPK8IP3.dAug10	uc002cmk.2,uc002cml.2,uc010uvl.1	1.14252	0.338369
7:111400378:+,7:111405174:+	1.9196	-0.0460848	5.44063	1.75477e-06	2.84451e-05	4.52367	DOCK4	core	NM_014705	ENST00000342288,ENST00000352877,ENST00000423057,ENST00000428053,ENST00000428084,ENST00000437633,ENST00000445943,ENST00000494651	DOCK4.aAug10,DOCK4.bAug10,DOCK4.cAug10,DOCK4.eAug10,DOCK4.fAug10,DOCK4.jAug10	uc003vfw.2,uc003vfx.2,uc003vfy.2,uc011kml.1,uc011kmm.1	1.92237	-0.00277715
2:167084233:+,2:167085201:+	2.24257	-0.18861	5.43816	1.76988e-06	2.86623e-05	4.15182	SCN9A	core	NM_002977	ENST00000303354,ENST00000375387,ENST00000409435,ENST00000409672	SCN9A.aAug10	uc010fpl.2	1.86614	0.376435
10:20500658:+,10:20506355:+	2.22546	-0.423532	5.43528	1.7877e-06	2.88902e-05	4.23525	PLXDC2	core	NM_032812	ENST00000377238,ENST00000377242,ENST00000377252,ENST00000536022	PLXDC2.aAug10,PLXDC2.bAug10,PLXDC2.dAug10,PLXDC2.eAug10	uc001iqg.1,uc001iqh.1	2.22435	0.00110859
2:232081506:+,2:232087441:+	1.0597	1.41932	5.43122	1.81308e-06	2.92533e-05	4.95203	ARMC9	core	NM_025139	ENST00000349938,ENST00000359743,ENST00000469789,ENST00000483477	ARMC9.aAug10,ARMC9.bAug10,ARMC9.eAug10,ARMC9.fAug10	uc002vrp.3,uc002vrq.3	0.862195	0.197505
X:130219038:+,X:130219562:+	2.21421	-0.16722	5.4294	1.82452e-06	2.93957e-05	4.14535	ARHGAP36	core	NM_144967	ENST00000276211,ENST00000370921,ENST00000370922,ENST00000412432	ARHGAP36.aAug10,ARHGAP36.bAug10,ARHGAP36.cAug10,ARHGAP36.dAug10,ARHGAP36.eAug10	uc004evz.2,uc004ewa.2,uc004ewb.2,uc004ewc.2	1.69313	0.521081
12:19436679:+,12:19440407:+	1.39988	1.01321	5.42859	1.82972e-06	2.94722e-05	4.84362	PLEKHA5	core	NM_001143821,NM_019012	ENST00000299275,ENST00000309364,ENST00000317589,ENST00000355397,ENST00000359180,ENST00000424268,ENST00000429027,ENST00000510738,ENST00000536974,ENST00000538677,ENST00000538714,ENST00000539256,ENST00000542828,ENST00000543806	PLEKHA5.aAug10,PLEKHA5.bAug10,PLEKHA5.cAug10,PLEKHA5.dAug10,PLEKHA5.eAug10,PLEKHA5.fAug10,PLEKHA5.gAug10,PLEKHA5.hAug10,PLEKHA5.iAug10,PLEKHA5.kAug10	uc001rea.2,uc001reb.2,uc001rec.1,uc009zin.2,uc010sie.1,uc010sif.1,uc010sig.1,uc010sih.1	1.25147	0.14841
7:48129961:+,7:48134360:+	1.23553	1.19595	5.42776	1.83495e-06	2.95491e-05	4.91065	UPP1	core	NM_003364,NM_181597	ENST00000331803,ENST00000341253,ENST00000395560,ENST00000395564,ENST00000416681,ENST00000417464,ENST00000421046,ENST00000429491,ENST00000432131,ENST00000436673,ENST00000444999,ENST00000457596,ENST00000482015	UPP1.aAug10,UPP1.bAug10,UPP1.cAug10,UPP1.dAug10,UPP1.fAug10,UPP1.gAug10,UPP1.jAug10,UPP1.kAug10,UPP1.lAug10,UPP1.nAug10,UPP1.oAug10,UPP1.qAug10,UPP1.rAug10,UPP1.sAug10,UPP1.tAug10,UPP1.uAug10,UPP1.vaAug10,UPP1.vbAug10,UPP1.vcAug10	uc003toj.2,uc003tok.2,uc003tol.2,uc003ton.2,uc003too.2,uc011kcg.1,uc011kch.1	1.17026	0.0652735
19:39994928:+,19:39995869:+	1.05057	1.48652	5.41944	1.88873e-06	3.02983e-05	4.91391	DLL3	core	NM_016941,NM_203486	ENST00000205143,ENST00000356433	DLL3.aAug10,DLL3.bAug10,DLL3.cAug10,DLL3.dAug10	uc002olw.2,uc002olx.2,uc010egq.2	0.888058	0.162517
2:202677285:+,2:202687532:+	1.38197	-0.0683682	5.41585	1.91244e-06	3.05856e-05	4.81908	CDK15	core	NM_139158	ENST00000260967,ENST00000374598,ENST00000410091,ENST00000434439,ENST00000450471,ENST00000451080,ENST00000488419	CDK15.aAug10,CDK15.bAug10,CDK15.cAug10,CDK15.dAug10,CDK15.eAug10,CDK15.fAug10,CDK15.gAug10	uc002uys.2,uc002uyt.2,uc010ftm.2,uc010ftn.1,uc010fto.1	1.61332	-0.231346
10:14572514:+,10:14646239:+	1.06576	1.58898	5.41386	1.92564e-06	3.07722e-05	4.89574	FAM107B	extended	None	ENST00000468747,ENST00000471815	FAM107B.mAug10,FAM107B.rAug10	uc001imz.1	0.62351	0.442253
22:45607988:+,22:45608146:+	2.01494	-0.357772	5.40994	1.95201e-06	3.11291e-05	4.31324	C22orf9	core	NM_015264	ENST00000251993,ENST00000492273	C22orf9.cAug10,C22orf9.nAug10	uc003bfw.1	0.874169	1.14077
1:33330398:+,1:33333354:+	2.00956	-0.136494	5.40935	1.95603e-06	3.11832e-05	4.37723	FNDC5	core	NM_001171940,NM_001171941,NM_153756	ENST00000373470,ENST00000373471,ENST00000496770	FNDC5.aAug10,FNDC5.bAug10,FNDC5.cAug10,FNDC5.dAug10	uc001bwf.1,uc001bwg.2	1.93926	0.0703064
11:118984698:+,11:118984790:+	1.19332	1.39253	5.40538	1.98319e-06	3.1551e-05	4.8447	C2CD2L	core	NM_014807	ENST00000336702,ENST00000525598,ENST00000528586	C2CD2L.aAug10,C2CD2L.bAug10,C2CD2L.cAug10,C2CD2L.dAug10	uc001pvn.2,uc001pvo.2	1.13942	0.0539
9:23701602:+,9:23704916:+	1.42502	1.27029	5.40519	1.9845e-06	3.15619e-05	4.76118	ELAVL2	core	NM_001171195,NM_001171197,NM_004432	ENST00000223951,ENST00000359598,ENST00000380110,ENST00000380117,ENST00000397312,ENST00000423281,ENST00000440102,ENST00000544538	ELAVL2.aAug10,ELAVL2.bAug10,ELAVL2.cAug10,ELAVL2.dAug10,ELAVL2.eAug10,ELAVL2.fAug10,ELAVL2.jAug10	uc003zps.2,uc003zpt.2,uc003zpu.2,uc003zpv.2,uc003zpw.2	1.50319	-0.0781746
16:1814460:+,16:1815014:+	1.16878	1.57419	5.40182	2.00782e-06	3.18771e-05	4.84615	MAPK8IP3	core	NM_001040439,NM_015133	ENST00000250894,ENST00000356010	MAPK8IP3.aAug10,MAPK8IP3.bAug10,MAPK8IP3.cAug10,MAPK8IP3.oAug10	uc002cmk.2,uc002cml.2,uc010uvl.1	1.14252	0.0262679
10:20508031:+,10:20534274:+	2.35067	-0.45468	5.39997	2.02072e-06	3.20524e-05	3.9174	PLXDC2	core	NM_032812	ENST00000377238,ENST00000377242,ENST00000377252,ENST00000536022	PLXDC2.aAug10,PLXDC2.bAug10,PLXDC2.cAug10,PLXDC2.dAug10,PLXDC2.eAug10	uc001iqg.1,uc001iqh.1,uc009xkc.1	2.22435	0.126322
2:120776840:+,2:120799582:+	1.25812	1.00778	5.39968	2.02276e-06	3.20736e-05	4.81371	EPB41L5	core	NM_001184937,NM_001184938,NM_001184939,NM_020909	ENST00000263713,ENST00000331393,ENST00000443124,ENST00000443902,ENST00000452780,ENST00000466241	EPB41L5.aAug10,EPB41L5.bAug10,EPB41L5.dAug10,EPB41L5.eAug10,EPB41L5.fAug10,EPB41L5.hAug10	uc002tmg.2,uc002tmh.3,uc010flk.2,uc010fll.2	0.800093	0.458024
X:19014270:+,X:19017114:+	1.21779	0.884644	5.39914	2.0266e-06	3.21243e-05	4.82906	GPR64	core	NM_001079858,NM_001079859,NM_001079860,NM_001184833,NM_001184834,NM_001184835,NM_001184836,NM_001184837,NM_005756	ENST00000340581,ENST00000354791,ENST00000356606,ENST00000357544,ENST00000357991,ENST00000360279,ENST00000379869,ENST00000379873,ENST00000379876,ENST00000379878,ENST00000397917	GPR64.aAug10,GPR64.bAug10,GPR64.cAug10,GPR64.dAug10,GPR64.eAug10,GPR64.fAug10,GPR64.gAug10,GPR64.hAug10,GPR64.iAug10,GPR64.jAug10,GPR64.kAug10	uc004cyw.2,uc004cyx.2,uc004cyy.2,uc004cyz.2,uc004cza.2,uc004czb.2,uc004czc.2,uc004czd.2,uc004cze.2,uc004czf.2,uc010nfj.2	1.29067	-0.0728774
3:40429588:+,3:40433514:+	1.83397	-0.667239	5.3985	2.03107e-06	3.21693e-05	4.46134	ENTPD3	core	NM_001248	ENST00000301825,ENST00000439533,ENST00000445129,ENST00000456402	ENTPD3.aAug10,ENTPD3.bAug10,ENTPD3.cAug10,ENTPD3.dAug10,ENTPD3.eAug10	uc003ckd.3,uc010hhy.2	2.10296	-0.268994
2:165950988:+,2:165952021:+	2.87386	-1.03916	5.39764	2.03712e-06	3.22503e-05	3.2315	SCN3A	core	NM_001081676,NM_001081677,NM_006922	ENST00000283254,ENST00000360093,ENST00000409101	SCN3A.aAug10,SCN3A.bAug10,SCN3A.cAug10,SCN3A.gAug10	uc002ucx.2,uc002ucy.2,uc002ucz.2	1.32951	1.54435
12:19410471:+,12:19413883:+	1.16772	1.3554	5.39585	2.04984e-06	3.24312e-05	4.82622	PLEKHA5	core	NM_001143821,NM_019012	ENST00000299275,ENST00000309364,ENST00000317589,ENST00000355397,ENST00000359180,ENST00000412219,ENST00000424268,ENST00000429027,ENST00000510738,ENST00000536974,ENST00000538305,ENST00000538714,ENST00000542828,ENST00000543806	PLEKHA5.aAug10,PLEKHA5.bAug10,PLEKHA5.cAug10,PLEKHA5.dAug10,PLEKHA5.eAug10,PLEKHA5.fAug10,PLEKHA5.iAug10	uc001rea.2,uc001reb.2,uc010sie.1,uc010sif.1,uc010sig.1,uc010sih.1	1.25147	-0.0837471
16:65087831:+,16:65155783:+	1.46478	0.556175	5.39474	2.05771e-06	3.25352e-05	4.70385	CDH11	core	NM_001797	ENST00000268603,ENST00000394156,ENST00000536902,ENST00000538390	toyglo.cAug10	uc002eoi.2,uc002eoj.2,uc010vin.1	1.22347	0.241315
1:153750361:+,1:153750637:+	1.7383	0.569016	5.39349	2.0667e-06	3.26516e-05	4.55858	SLC27A3	core	NM_024330	ENST00000271857,ENST00000368661,ENST00000458027,ENST00000484014	SLC27A3.aAug10,SLC27A3.bAug10	uc001fcz.2,uc009won.2	1.62818	0.110117
17:39925459:+,17:39925670:+	1.07669	1.66657	5.39227	2.07543e-06	3.27792e-05	4.82412	JUP	core	NM_002230,NM_021991	ENST00000310706,ENST00000393930,ENST00000393931,ENST00000420370,ENST00000424457,ENST00000437187,ENST00000449889,ENST00000540235	JUP.aAug10,JUP.bAug10,JUP.cAug10,JUP.dAug10,JUP.eAug10,JUP.fAug10,JUP.hAug10	uc002hxq.2,uc002hxr.2,uc002hxs.2,uc010wfs.1	0.775769	0.300924
10:61843375:+,10:61844360:+	2.02514	-0.676865	5.38992	2.09239e-06	3.30055e-05	4.23415	ANK3	core	NM_001149,NM_001204403,NM_001204404,NM_020987	ENST00000280772,ENST00000355288,ENST00000373817,ENST00000373827,ENST00000395293,ENST00000395299,ENST00000395302,ENST00000395304,ENST00000423532,ENST00000503366,ENST00000508449,ENST00000544789	ANK3.aAug10,ANK3.bAug10,ANK3.cAug10,ANK3.dAug10,ANK3.eAug10,ANK3.fAug10,ANK3.gAug10,ANK3.iAug10,ANK3.nAug10,ANK3.vbAug10	uc001jkw.2,uc001jkx.2,uc001jky.2,uc001jkz.3,uc001jla.1,uc009xpa.2,uc010qih.1	1.6071	0.418032
7:24902911:+,7:24903115:+	1.08049	1.46407	5.38669	2.11599e-06	3.33357e-05	4.80543	OSBPL3	core	NM_015550,NM_145321	ENST00000313367,ENST00000353930,ENST00000396429,ENST00000409452,ENST00000409759	OSBPL3.aAug10,OSBPL3.cAug10,OSBPL3.eAug10,OSBPL3.gAug10	uc003sxd.2,uc003sxf.2,uc003sxg.2,uc003sxj.1	1.34571	-0.265223
10:61973268:+,10:61994446:+	1.80749	-0.332011	5.38296	2.14355e-06	3.36957e-05	4.39596	ANK3	core	NM_001204403,NM_001204404,NM_020987	ENST00000280772,ENST00000373827,ENST00000395293,ENST00000395299,ENST00000395304,ENST00000503366,ENST00000510495	ANK3.aAug10,ANK3.bAug10,ANK3.cAug10,ANK3.hAug10	uc001jky.2,uc001jkz.3,uc001jlb.1,uc010qih.1	1.6071	0.200385
1:28598382:+,1:28598795:+	1.53852	0.729073	5.37853	2.17668e-06	3.41363e-05	4.63293	SESN2	core	NM_031459	ENST00000253063	SESN2.aAug10	uc001bps.2	1.14676	0.391756
19:55798469:+,19:55798582:+	1.05147	1.02835	5.37595	2.19627e-06	3.43952e-05	4.77236	BRSK1	core	NM_032430	ENST00000309383	BRSK1.aAug10,BRSK1.bAug10,BRSK1.fAug10	uc002qkf.2,uc002qkg.2	0.913109	0.138361
3:64590007:+,3:64592636:+	1.16779	0.883824	5.3712	2.23269e-06	3.49217e-05	4.75002	ADAMTS9	core	NM_182920	ENST00000295903,ENST00000481060,ENST00000482490,ENST00000498707	ADAMTS9.aAug10,ADAMTS9.bAug10,ADAMTS9.cAug10,ADAMTS9.eAug10	uc003dmg.2,uc003dmh.1,uc011bfo.1,uc011bfp.1	0.901905	0.265883
17:40652941:+,17:40653215:+	1.04226	1.61703	5.37091	2.23497e-06	3.4952e-05	4.75609	ATP6V0A1	core	NM_001130020,NM_001130021,NM_005177	ENST00000264649,ENST00000343619,ENST00000393829,ENST00000537728,ENST00000544137,ENST00000546249	ATP6V0A1.aAug10,ATP6V0A1.bAug10,ATP6V0A1.cAug10,ATP6V0A1.dAug10,ATP6V0A1.eAug10,ATP6V0A1.fAug10,ATP6V0A1.gAug10,ATP6V0A1.nAug10,ATP6V0A1.sAug10,ATP6V0A1.vjAug10	uc002hzq.2,uc002hzr.2,uc002hzs.2,uc010cyg.2,uc010wgj.1,uc010wgk.1,uc010wgl.1	0.961028	0.081237
1:202932293:+,1:202932770:+	1.05541	1.35807	5.36551	2.27712e-06	3.55115e-05	4.7388	CYB5R1	core	NM_016243	ENST00000367249,ENST00000446185,ENST00000482572,ENST00000497655	CYB5R1.aAug10,CYB5R1.cAug10,CYB5R1.dAug10,CYB5R1.fAug10,CYB5R1.gAug10,CYB5R1.hAug10	uc001gyt.2,uc010pqe.1	0.811044	0.244368
1:94048510:+,1:94049575:+	1.00572	1.91225	5.36041	2.31775e-06	3.60554e-05	4.71947	BCAR3	core	NM_003567	ENST00000260502,ENST00000370243,ENST00000370244,ENST00000370247,ENST00000466632,ENST00000539242	BCAR3.aAug10,BCAR3.bAug10,BCAR3.cAug10,BCAR3.dAug10,BCAR3.eAug10,BCAR3.fAug10,BCAR3.hAug10	uc001dpx.3,uc001dpy.2,uc001dpz.2,uc001dqa.2,uc001dqb.2,uc009wdm.1	0.912148	0.0935733
2:112856275:+,2:112858199:+	1.82311	0.592023	5.3579	2.33797e-06	3.63248e-05	4.35976	TMEM87B	core	NM_032824	ENST00000283206,ENST00000463427	TMEM87B.aAug10,TMEM87B.bAug10	uc002thm.2	1.73822	0.0848866
10:61823012:+,10:61823915:+	1.69283	-0.353532	5.35444	2.36615e-06	3.67056e-05	4.42713	ANK3	core	NM_001149,NM_001204403,NM_001204404,NM_020987	ENST00000280772,ENST00000355288,ENST00000373817,ENST00000373820,ENST00000373827,ENST00000395299,ENST00000423532,ENST00000459732,ENST00000503366,ENST00000511043,ENST00000514197	ANK3.aAug10,ANK3.bAug10,ANK3.cAug10,ANK3.eAug10,ANK3.fAug10,ANK3.gAug10,ANK3.iAug10,ANK3.jAug10,ANK3.lAug10,ANK3.mAug10,ANK3.sAug10	uc001jkv.2,uc001jkw.2,uc001jkx.2,uc001jky.2,uc001jkz.3,uc009xpa.2,uc010qih.1	1.6071	0.0857287
2:166374471:+,2:166451553:+	1.06805	1.25818	5.35397	2.36998e-06	3.67595e-05	4.70084	CSRNP3	core	NM_001172173	ENST00000314499,ENST00000421875,ENST00000431452	CSRNP3.bAug10	uc002udf.2	0.938005	0.13004
7:111386473:+,7:111387323:+	1.66402	0.390546	5.35386	2.37094e-06	3.6763e-05	4.45745	DOCK4	core	NM_014705	ENST00000342288,ENST00000352877,ENST00000423057,ENST00000428084,ENST00000437633,ENST00000445943,ENST00000494651	DOCK4.aAug10,DOCK4.bAug10,DOCK4.cAug10,DOCK4.eAug10,DOCK4.fAug10	uc003vfw.2,uc003vfx.2,uc003vfy.2,uc011kml.1,uc011kmm.1	1.92237	-0.258357
3:33557643:+,3:33558473:+	1.0484	1.74132	5.3424	2.46685e-06	3.80178e-05	4.66387	CLASP2	core	NM_001207044,NM_015097	ENST00000307312,ENST00000359576,ENST00000399362,ENST00000461133,ENST00000468888,ENST00000476251,ENST00000480013,ENST00000487553,ENST00000539981	CLASP2.aAug10,CLASP2.bAug10,CLASP2.cAug10,CLASP2.dAug10,CLASP2.kAug10	uc003cfs.2,uc003cft.2,uc003cfu.2,uc010hgb.2	0.672544	0.375858
1:154940507:+,1:154940971:+	1.52399	0.560709	5.34222	2.46844e-06	3.80278e-05	4.50308	SHC1	extended	None	ENST00000412170,ENST00000414115	SHC1andPYGO2andPBXIP1.cAug10,SHC1andPYGO2andPBXIP1.vaAug10,SHC1andPYGO2andPBXIP1.vjAug10	None	0.732193	0.791801
2:166451723:+,2:166514271:+	1.12646	1.41623	5.33727	2.51106e-06	3.85835e-05	4.64259	CSRNP3	core	NM_001172173,NM_024969	ENST00000314499,ENST00000342316,ENST00000409420,ENST00000409664,ENST00000421875,ENST00000431452	CSRNP3.aAug10,CSRNP3.bAug10,CSRNP3.cAug10	uc002udf.2,uc002udg.2	0.938005	0.188451
17:29119590:+,17:29120468:+	1.45362	0.807501	5.33635	2.51902e-06	3.86703e-05	4.51075	CRLF3	core	NM_015986	ENST00000324238,ENST00000544695	CRLF3.aAug10,CRLF3.bAug10	uc002hfr.3,uc010wbr.1	1.5748	-0.121174
2:215890503:+,2:215891544:+	2.04313	-1.28185	5.3344	2.53616e-06	3.89036e-05	4.05493	ABCA12	core	NM_015657,NM_173076	ENST00000272895,ENST00000389661	ABCA12.aAug10,ABCA12.bAug10,ABCA12.cAug10	uc002vev.2,uc002vew.2,uc010zjn.1	1.49642	0.54671
7:111474742:+,7:111484819:+	1.99243	-0.220858	5.32631	2.6081e-06	3.98122e-05	4.11632	DOCK4	core	NM_014705	ENST00000342288,ENST00000352877,ENST00000423057,ENST00000428084,ENST00000437633,ENST00000544250	DOCK4.bAug10,DOCK4.cAug10	uc003vfw.2,uc003vfx.2	1.92237	0.0700537
2:120831754:+,2:120833052:+	1.07221	1.38745	5.32439	2.62546e-06	4.00467e-05	4.60492	EPB41L5	core	NM_001184937,NM_001184938,NM_001184939,NM_020909	ENST00000263713,ENST00000331393,ENST00000443124,ENST00000443902,ENST00000452780	EPB41L5.aAug10,EPB41L5.bAug10,EPB41L5.dAug10,EPB41L5.eAug10,EPB41L5.fAug10	uc002tmg.2,uc002tmh.3,uc010flk.2,uc010fll.2	0.800093	0.272113
12:58024115:+,12:58024261:+	1.71627	0.187243	5.32248	2.64291e-06	4.02761e-05	4.3743	B4GALNT1	core	NM_001478	ENST00000341156,ENST00000418555,ENST00000449184,ENST00000548888,ENST00000549391,ENST00000550764,ENST00000552350,ENST00000553142	B4GALNT1.aAug10,B4GALNT1.bAug10,B4GALNT1.cAug10,B4GALNT1.dAug10,B4GALNT1.eAug10,B4GALNT1.fAug10,B4GALNT1.gAug10,B4GALNT1.hAug10	uc001spg.1,uc001sph.2,uc001spi.2,uc010sru.1,uc010srv.1	1.42806	0.288214
7:111449457:+,7:111451930:+	1.90474	-0.0685043	5.32119	2.65469e-06	4.04249e-05	4.21945	DOCK4	core	NM_014705	ENST00000342288,ENST00000352877,ENST00000423057,ENST00000428084,ENST00000437633,ENST00000445943,ENST00000469898,ENST00000544250	DOCK4.aAug10,DOCK4.bAug10,DOCK4.cAug10	uc003vfw.2,uc003vfx.2,uc003vfy.2	1.92237	-0.0176322
11:20959405:+,11:20968882:+	1.42386	0.275808	5.32058	2.6603e-06	4.04919e-05	4.51221	NELL1	core	NM_006157,NM_201551	ENST00000298925,ENST00000325319,ENST00000357134,ENST00000530672,ENST00000532434	NELL1.aAug10,NELL1.bAug10,NELL1.cAug10,NELL1.dAug10,NELL1.lAug10	uc001mqe.2,uc001mqf.2,uc009yid.2,uc010rdo.1,uc010rdp.1	1.41287	0.0109947
16:69155073:+,16:69155339:+	1.00885	1.83951	5.31458	2.71608e-06	4.12031e-05	4.5732	CHTF8	core	NM_001039690,NM_001040146	ENST00000306585,ENST00000398235,ENST00000448552,ENST00000518041,ENST00000522091,ENST00000523421	CHTF8.dAug10,CHTF8.eAug10,CHTF8.fAug10,CHTF8.gAug10,CHTF8.jAug10,CHTF8.kAug10	uc002ewm.1,uc002ewn.1,uc002ewp.1	0.789592	0.219263
11:71951326:+,11:71952146:+	1.01365	1.64207	5.31299	2.73106e-06	4.13991e-05	4.56834	PHOX2A	novel	NONE	NONE	NONE	NONE	0.598175	0.415476
X:19021232:+,X:19022876:+	1.45003	0.349265	5.30695	2.78873e-06	4.21458e-05	4.43744	GPR64	core	NM_001079858,NM_001079859,NM_001079860,NM_001184833,NM_001184834,NM_001184835,NM_001184836,NM_001184837,NM_005756	ENST00000340581,ENST00000354791,ENST00000356606,ENST00000357544,ENST00000357991,ENST00000360279,ENST00000379869,ENST00000379873,ENST00000379876,ENST00000379878,ENST00000397917	GPR64.aAug10,GPR64.bAug10,GPR64.cAug10,GPR64.dAug10,GPR64.eAug10,GPR64.fAug10,GPR64.gAug10,GPR64.hAug10,GPR64.iAug10,GPR64.jAug10,GPR64.kAug10	uc004cyw.2,uc004cyx.2,uc004cyy.2,uc004cyz.2,uc004cza.2,uc004czb.2,uc004czc.2,uc004czd.2,uc004cze.2,uc004czf.2,uc010nfj.2	1.29067	0.159356
7:75510804:+,7:75511147:+	1.828	0.30089	5.30443	2.81309e-06	4.24501e-05	4.16587	RHBDD2	core	NM_001040457	ENST00000318622,ENST00000454791,ENST00000466232,ENST00000468644	RHBDD2.bAug10,RHBDD2.hAug10	uc003udv.1	1.30825	0.519751
12:77260041:+,12:77272718:+	1.10906	0.668342	5.30387	2.81852e-06	4.25128e-05	4.53533	CSRP2	core	NM_001321	ENST00000311083,ENST00000547435,ENST00000551725,ENST00000552330	CSRP2.aAug10,CSRP2.bAug10,CSRP2.dAug10,CSRP2.gAug10	uc001syl.1	1.16966	-0.0605995
7:111462512:+,7:111474644:+	1.53088	0.262072	5.30306	2.82649e-06	4.25946e-05	4.37191	DOCK4	core	NM_014705	ENST00000342288,ENST00000352877,ENST00000423057,ENST00000428084,ENST00000437633,ENST00000445943,ENST00000544250	DOCK4.aAug10,DOCK4.bAug10,DOCK4.cAug10	uc003vfw.2,uc003vfx.2,uc003vfy.2	1.92237	-0.391497
1:156177804:+,1:156180031:+	1.09096	1.15336	5.30126	2.8441e-06	4.28213e-05	4.5273	SLC25A44	core	NM_014655	ENST00000359511,ENST00000423538,ENST00000469537	SLC25A44.aAug10,SLC25A44.bAug10,SLC25A44.cAug10,SLC25A44.eAug10,SLC25A44.hAug10,SLC25A44.oAug10	uc001fnp.2,uc009wrr.2,uc010phc.1,uc010phd.1	1.18865	-0.0976938
X:19009166:+,X:19013014:+	1.31868	0.853955	5.30099	2.84671e-06	4.28477e-05	4.49872	GPR64	core	NM_001079858,NM_001079859,NM_001079860,NM_001184833,NM_001184835,NM_001184836,NM_001184837,NM_005756	ENST00000340581,ENST00000354791,ENST00000356606,ENST00000357544,ENST00000357991,ENST00000360279,ENST00000379869,ENST00000379876,ENST00000379878,ENST00000397917	GPR64.aAug10,GPR64.bAug10,GPR64.cAug10,GPR64.dAug10,GPR64.eAug10,GPR64.fAug10,GPR64.gAug10,GPR64.iAug10,GPR64.kAug10	uc004cyx.2,uc004cyy.2,uc004cyz.2,uc004cza.2,uc004czc.2,uc004czd.2,uc004cze.2,uc004czf.2,uc010nfj.2	1.29067	0.0280076
2:167141334:+,2:167142846:+	2.10686	0.0728298	5.297	2.88628e-06	4.33262e-05	3.93929	SCN9A	core	NM_002977	ENST00000303354,ENST00000375387,ENST00000409435,ENST00000409672,ENST00000452182,ENST00000454569	SCN9A.aAug10,SCN9A.bAug10,SCN9A.cAug10,SCN9A.dAug10	uc002udr.1,uc002uds.1,uc002udt.1,uc010fpl.2	1.86614	0.240719
7:75508578:+,7:75510683:+	1.81744	0.264031	5.29527	2.90354e-06	4.35723e-05	4.11618	RHBDD2	core	NM_001040457	ENST00000318622,ENST00000454791,ENST00000468304	RHBDD2.bAug10,RHBDD2.dAug10,RHBDD2.eAug10,RHBDD2.gAug10	uc003udv.1	1.30825	0.509189
16:65032759:+,16:65038545:+	1.1682	1.20375	5.29196	2.93692e-06	4.40072e-05	4.49267	CDH11	core	NM_001797	ENST00000268603,ENST00000394156,ENST00000536902	CDH11.aAug10,CDH11.bAug10	uc002eoi.2,uc002eoj.2,uc010cdn.2,uc010vio.1	1.22347	-0.055273
2:190648128:+,2:190648995:+	3.31351	-0.996291	5.28841	2.97317e-06	4.44672e-05	2.39057	ORMDL1,PMS1	extended	None	None	ORMDL1.mAug10	None	0.089007	3.2245
7:35674039:+,7:35674745:+	2.00573	0.28039	5.28835	2.97383e-06	4.44672e-05	3.9314	HERPUD2	core	NM_022373	ENST00000311350,ENST00000396081,ENST00000426180	HERPUD2.aAug10,HERPUD2.bAug10,HERPUD2.cAug10	uc003tes.3,uc003tet.2	1.27683	0.7289
19:49141401:+,19:49142145:+	1.09407	1.15388	5.28808	2.97658e-06	4.44753e-05	4.48416	CA11,SEC1	core	NM_001217	ENST00000084798	CA11.aAug10,CA11.fAug10	uc002pjz.1	0.98654	0.107534
2:12857136:+,2:12857378:+	1.60501	0.561209	5.28255	3.03399e-06	4.52185e-05	4.26248	TRIB2	extended	None	ENST00000483034	TRIB2.bAug10	None	1.05044	0.554572
7:111512408:+,7:111512523:+	1.50091	0.554083	5.28057	3.05483e-06	4.54614e-05	4.32223	DOCK4	core	NM_014705	ENST00000342288,ENST00000352877,ENST00000423057,ENST00000428084,ENST00000437633,ENST00000445943,ENST00000476846,ENST00000544250	DOCK4.aAug10,DOCK4.bAug10,DOCK4.cAug10,DOCK4.dAug10	uc003vfw.2,uc003vfx.2,uc003vfy.2,uc003vga.1	1.92237	-0.42146
X:19041571:+,X:19042027:+	1.19656	0.847955	5.27889	3.07256e-06	4.56711e-05	4.4391	GPR64	core	NM_001079858,NM_001079859,NM_001079860,NM_001184833,NM_001184834,NM_001184835,NM_001184836,NM_001184837,NM_005756	ENST00000340581,ENST00000354791,ENST00000356606,ENST00000357544,ENST00000357991,ENST00000360279,ENST00000379869,ENST00000379873,ENST00000379876,ENST00000379878,ENST00000397917,ENST00000479496	GPR64.aAug10,GPR64.bAug10,GPR64.cAug10,GPR64.dAug10,GPR64.eAug10,GPR64.fAug10,GPR64.gAug10,GPR64.hAug10,GPR64.iAug10,GPR64.jAug10,GPR64.kAug10,GPR64.lAug10	uc004cyw.2,uc004cyx.2,uc004cyy.2,uc004cyz.2,uc004cza.2,uc004czb.2,uc004czc.2,uc004czd.2,uc004cze.2,uc004czf.2,uc010nfj.2	1.29067	-0.0941155
12:19413955:+,12:19418684:+	1.5158	0.563672	5.27513	3.11272e-06	4.61858e-05	4.27711	PLEKHA5	core	NM_001143821,NM_019012	ENST00000299275,ENST00000309364,ENST00000317589,ENST00000355397,ENST00000359180,ENST00000412219,ENST00000424268,ENST00000429027,ENST00000510738,ENST00000536974,ENST00000538305,ENST00000538714,ENST00000542828,ENST00000543806	PLEKHA5.aAug10,PLEKHA5.bAug10,PLEKHA5.cAug10,PLEKHA5.dAug10,PLEKHA5.eAug10,PLEKHA5.fAug10,PLEKHA5.iAug10	uc001rea.2,uc001reb.2,uc010sie.1,uc010sif.1,uc010sig.1,uc010sih.1	1.25147	0.264328
1:28595759:+,1:28598185:+	1.56412	0.543084	5.27236	3.14264e-06	4.65471e-05	4.2364	SESN2	core	NM_031459	ENST00000253063	SESN2.aAug10	uc001bps.2	1.14676	0.417359
7:48146679:+,7:48146958:+	1.1913	1.17138	5.26675	3.20411e-06	4.7339e-05	4.40431	UPP1	core	NM_003364,NM_181597	ENST00000331803,ENST00000341253,ENST00000395560,ENST00000395564,ENST00000417464,ENST00000429491,ENST00000457596,ENST00000482015,ENST00000495446	UPP1.aAug10,UPP1.bAug10,UPP1.cAug10,UPP1.eAug10,UPP1.fAug10,UPP1.gAug10,UPP1.iAug10,UPP1.mAug10,UPP1.qAug10,UPP1.rAug10,UPP1.sAug10,UPP1.tAug10,UPP1.vbAug10	uc003toj.2,uc003tok.2,uc003tol.2,uc003ton.2,uc003too.2,uc011kch.1	1.17026	0.0210446
12:19511371:+,12:19512346:+	1.19472	1.29859	5.26115	3.26666e-06	4.81139e-05	4.38348	PLEKHA5	core	NM_001143821,NM_019012	ENST00000299275,ENST00000317589,ENST00000355397,ENST00000359180,ENST00000424268,ENST00000429027,ENST00000536974,ENST00000538714,ENST00000538972,ENST00000539256,ENST00000542828,ENST00000543806	PLEKHA5.aAug10,PLEKHA5.bAug10,PLEKHA5.cAug10,PLEKHA5.dAug10,PLEKHA5.eAug10,PLEKHA5.fAug10,PLEKHA5.gAug10,PLEKHA5.hAug10,PLEKHA5.jAug10,PLEKHA5.oAug10	uc001rea.2,uc001reb.2,uc001rec.1,uc009zin.2,uc009zio.2,uc010sie.1,uc010sif.1,uc010sig.1,uc010sih.1	1.25147	-0.0567454
2:88998062:+,2:88999527:+	1.71895	0.462095	5.25681	3.31597e-06	4.87327e-05	4.08231	RPIA	core	NM_144563	ENST00000283646	RPIA.aAug10,RPIA.bAug10	uc002ste.2	1.32243	0.396518
19:49142878:+,19:49143045:+	1.05677	1.51862	5.25552	3.33073e-06	4.88852e-05	4.38324	CA11,SEC1	core	NM_001217	ENST00000084798	CA11.aAug10,CA11.bAug10,CA11.cAug10	uc002pjz.1	0.98654	0.0702265
2:165793939:+,2:165795960:+	2.96119	-2.00832	5.25366	3.35215e-06	4.91563e-05	2.68685	SLC38A11	core	NM_001199148,NM_173512	ENST00000303735,ENST00000409058,ENST00000409149,ENST00000409662,ENST00000465898	SLC38A11.aAug10,SLC38A11.bAug10,SLC38A11.cAug10,SLC38A11.dAug10,SLC38A11.hAug10	uc002ucu.1,uc002ucv.1,uc002ucw.1	2.75129	0.209905
8:62555992:+,8:62557159:+	1.18555	0.452555	5.25306	3.35913e-06	4.92358e-05	4.35795	ASPH	core	NM_001164752,NM_001164754	ENST00000389213,ENST00000518306	ASPH.cAug10,ASPH.dAug10,ASPH.iAug10,ASPH.jAug10	uc003xuo.2,uc011leh.1,uc011lek.1	-0.242808	1.42836
2:167143133:+,2:167144947:+	1.8093	0.202414	5.24772	3.42151e-06	5.00564e-05	4.00212	SCN9A	core	NM_002977	ENST00000303354,ENST00000375387,ENST00000409435,ENST00000409672,ENST00000452182,ENST00000454569	SCN9A.aAug10,SCN9A.bAug10,SCN9A.cAug10,SCN9A.dAug10	uc002udr.1,uc002uds.1,uc002udt.1,uc010fpl.2	1.86614	-0.056837
3:40453453:+,3:40456172:+	2.93758	-1.57806	5.24754	3.42367e-06	5.00807e-05	2.87449	ENTPD3	core	NM_001248	ENST00000301825,ENST00000445129,ENST00000456402	ENTPD3.aAug10,ENTPD3.bAug10,ENTPD3.cAug10,ENTPD3.dAug10	uc003ckd.3,uc010hhy.2	2.10296	0.83462
1:205308936:+,1:205312357:+	2.87651	-0.509756	5.24606	3.44122e-06	5.02786e-05	2.87103	KLHDC8A	core	NM_018203	ENST00000367155,ENST00000367156,ENST00000539253	KLHDC8A.aAug10,KLHDC8A.bAug10,KLHDC8A.cAug10,KLHDC8A.dAug10,KLHDC8A.iAug10	uc001hcf.1,uc001hcg.1	2.27442	0.602094
16:1810533:+,16:1811225:+	1.02452	1.79278	5.24368	3.46954e-06	5.06393e-05	4.34534	MAPK8IP3	core	NM_001040439,NM_015133	ENST00000250894,ENST00000356010	MAPK8IP3.aAug10,MAPK8IP3.bAug10,MAPK8IP3.cAug10	uc002cmk.2,uc002cml.2,uc010uvl.1	1.14252	-0.117994
20:23370667:+,20:23370846:+	1.2227	1.25995	5.24203	3.48928e-06	5.08696e-05	4.32252	NAPB	core	NM_022080	ENST00000377026,ENST00000398425,ENST00000431864,ENST00000432543,ENST00000468128,ENST00000472855	NAPB.aAug10,NAPB.bAug10,NAPB.cAug10,NAPB.dAug10,NAPB.eAug10,NAPB.fAug10,NAPB.gAug10,NAPB.hAug10,NAPB.iAug10,NAPB.jAug10,NAPB.mAug10,NAPB.pAug10,NAPB.sAug10,NAPB.tAug10,NAPB.uAug10,NAPB.vaAug10	uc002wta.2,uc002wtb.2,uc002wtc.2,uc002wtd.3,uc010zss.1,uc010zst.1	1.24026	-0.0175558
11:21581928:+,11:21592310:+	1.33137	0.187216	5.24076	3.50464e-06	5.10638e-05	4.26995	NELL1	core	NM_006157,NM_201551	ENST00000298925,ENST00000325319,ENST00000357134,ENST00000532434	NELL1.aAug10,NELL1.bAug10,NELL1.cAug10,NELL1.dAug10	uc001mqe.2,uc001mqf.2,uc009yid.2,uc010rdo.1,uc010rdp.1	1.41287	-0.0814969
8:62289338:+,8:62366700:+	1.73298	0.264645	5.23923	3.52312e-06	5.12808e-05	4.00344	CLVS1	core	NM_173519	ENST00000325897,ENST00000518592,ENST00000519846,ENST00000524095	CLVS1.aAug10,CLVS1.bAug10,CLVS1.cAug10,CLVS1.eAug10	uc003xuh.2,uc003xui.2,uc010lyp.2	1.49175	0.241227
20:23360132:+,20:23360504:+	1.15094	1.39534	5.23679	3.55288e-06	5.1654e-05	4.31549	NAPB	core	NM_022080	ENST00000377026,ENST00000398425,ENST00000431864,ENST00000432543,ENST00000468128	NAPB.aAug10,NAPB.bAug10,NAPB.cAug10,NAPB.dAug10,NAPB.eAug10,NAPB.fAug10,NAPB.hAug10,NAPB.nAug10,NAPB.oAug10,NAPB.rAug10,NAPB.sAug10,NAPB.uAug10	uc002wta.2,uc002wtb.2,uc002wtc.2,uc002wtd.3,uc010zss.1,uc010zst.1	1.24026	-0.0893161
2:112824644:+,2:112832489:+	1.74537	0.50357	5.23509	3.57377e-06	5.19051e-05	4.00899	TMEM87B	core	NM_032824	ENST00000283206	TMEM87B.aAug10	uc002thm.2	1.73822	0.0071518
5:77860694:+,5:77928087:+	1.89652	0.079534	5.23354	3.593e-06	5.21315e-05	3.87752	LHFPL2	core	NM_005779	ENST00000380345,ENST00000512759	LHFPL2.dAug10,LHFPL2.gAug10	uc003kfo.2	1.6418	0.254721
1:33337853:+,1:33337995:+	3.10375	-1.71266	5.23211	3.61069e-06	5.23523e-05	2.63582	FNDC5	extended	None	None	FNDC5.gAug10	None	1.93926	1.16449
16:1814211:+,16:1814302:+	1.35862	1.1524	5.23058	3.62984e-06	5.25823e-05	4.24214	MAPK8IP3	core	NM_001040439,NM_015133	ENST00000250894,ENST00000356010	MAPK8IP3.aAug10,MAPK8IP3.bAug10,MAPK8IP3.cAug10,MAPK8IP3.oAug10	uc002cmk.2,uc002cml.2,uc010uvl.1	1.14252	0.216099
1:156838041:+,1:156838297:+	1.55174	0.586082	5.22538	3.69549e-06	5.34371e-05	4.14566	NTRK1	core	NM_001007792,NM_001012331,NM_002529	ENST00000358660,ENST00000368196,ENST00000392302,ENST00000497019,ENST00000524377,ENST00000530298	NTRK1.aAug10,NTRK1.bAug10,NTRK1.cAug10,NTRK1.dAug10,NTRK1.eAug10,NTRK1.fAug10,NTRK1.gAug10	uc001fqf.1,uc001fqh.1,uc001fqi.1,uc009wsi.1,uc009wsk.1	1.00514	0.546606
7:111540592:+,7:111541733:+	1.50417	0.569944	5.22091	3.75283e-06	5.41761e-05	4.18697	DOCK4	core	NM_014705	ENST00000342288,ENST00000352877,ENST00000428084,ENST00000437633,ENST00000445943,ENST00000476846,ENST00000544250	DOCK4.aAug10,DOCK4.bAug10,DOCK4.dAug10	uc003vfx.2,uc003vfy.2,uc003vga.1	1.92237	-0.418207
16:57945779:+,16:57946834:+	3.50941	-1.52629	5.21242	3.86414e-06	5.5559e-05	2.1139	CNGB1	core	NM_001297	ENST00000251102	CNGB1.aAug10,CNGB1.bAug10	uc002emt.2,uc010cdh.2	3.51415	-0.00473711
16:65006943:+,16:65015951:+	1.29081	0.790815	5.20787	3.92512e-06	5.62904e-05	4.18406	CDH11	core	NM_001797	ENST00000268603,ENST00000394156,ENST00000538390	CDH11.aAug10,CDH11.bAug10	uc002eoi.2,uc002eoj.2,uc010vin.1	1.22347	0.0673363
12:81205462:+,12:81239509:+	1.13	0.909571	5.20523	3.96104e-06	5.67406e-05	4.2153	LIN7A	core	NM_004664	ENST00000261203,ENST00000552864	LIN7A.aAug10,LIN7A.dAug10	uc001szj.1,uc001szk.1	0.850021	0.279983
17:76705814:+,17:76732774:+	2.21073	-0.363872	5.19749	4.06795e-06	5.80545e-05	3.48065	CYTH1	extended	None	ENST00000416418,ENST00000462867	CYTH1.cAug10,CYTH1.jAug10	None	0.417871	1.79285
9:2622271:+,9:2635453:+	1.68818	0.0636023	5.1947	4.10717e-06	5.85384e-05	3.93728	FLJ35024,VLDLR	core	NM_001018056,NM_003383	ENST00000382092,ENST00000382096,ENST00000382099,ENST00000382100	FLJ35024.fAug10,VLDLR.aAug10,VLDLR.bAug10,VLDLR.cAug10	uc003zhk.1,uc003zhl.1,uc003zhm.1,uc003zhn.1	1.68795	0.000238493
7:65580449:+,7:65592691:+	2.11932	-0.0172197	5.19387	4.11895e-06	5.8644e-05	3.55011	CRCP	extended	None	None	ASLandCRCP.veAug10	None	0.718968	1.40035
2:202672366:+,2:202672581:+	2.54372	-1.46943	5.19386	4.11907e-06	5.8644e-05	3.07637	CDK15	core	NM_139158	ENST00000260967,ENST00000374598,ENST00000410091,ENST00000434439,ENST00000450471,ENST00000488419	CDK15.aAug10,CDK15.bAug10,CDK15.cAug10,CDK15.dAug10,CDK15.eAug10,CDK15.fAug10	uc002uys.2,uc002uyt.2,uc010ftn.1,uc010fto.1	1.61332	0.930408
5:145969789:+,5:145972534:+	1.3055	1.72966	5.19096	4.16036e-06	5.91447e-05	4.14778	PPP2R2B	core	NM_001127381,NM_004576,NM_181674,NM_181675,NM_181676,NM_181677,NM_181678	ENST00000336640,ENST00000356826,ENST00000394409,ENST00000394410,ENST00000394411,ENST00000394413,ENST00000394414,ENST00000453001,ENST00000504198,ENST00000508545,ENST00000512639,ENST00000530902	PPP2R2B.aAug10,PPP2R2B.bAug10,PPP2R2B.cAug10,PPP2R2B.dAug10,PPP2R2B.eAug10,PPP2R2B.fAug10,PPP2R2B.gAug10,PPP2R2B.hAug10,PPP2R2B.iAug10,PPP2R2B.jAug10	uc003loe.2,uc003lof.3,uc003log.3,uc003loh.3,uc003loi.3,uc003loj.3,uc003lok.3,uc010jgm.2,uc011dbu.1,uc011dbv.1	1.87928	-0.573779
1:28598977:+,1:28599092:+	1.36108	1.10607	5.18814	4.20093e-06	5.96399e-05	4.12971	SESN2	core	NM_031459	ENST00000253063	SESN2.aAug10	uc001bps.2	1.14676	0.214314
3:40428752:+,3:40429537:+	1.88459	-1.03322	5.18509	4.24523e-06	6.01412e-05	3.701	ENTPD3	core	NM_001248	ENST00000301825	ENTPD3.bAug10,ENTPD3.cAug10	uc003ckd.3	2.10296	-0.218373
4:156725899:+,4:156726255:+	1.04705	1.33157	5.17844	4.34347e-06	6.13508e-05	4.13594	GUCY1B3	core	NM_000857	ENST00000264424,ENST00000502959,ENST00000503520,ENST00000505154,ENST00000505764,ENST00000507146,ENST00000513437	GUCY1B3.aAug10,GUCY1B3.bAug10,GUCY1B3.cAug10,GUCY1B3.dAug10,GUCY1B3.eAug10,GUCY1B3.fAug10,GUCY1B3.gAug10,GUCY1B3.hAug10	uc003ipc.2,uc003ipd.2,uc010iqf.2,uc010iqg.2,uc011cio.1,uc011cip.1,uc011ciq.1	0.950385	0.0966615
3:64527296:+,3:64527514:+	1.2324	0.693783	5.17401	4.41017e-06	6.2141e-05	4.08894	ADAMTS9	core	NM_182920	ENST00000295903,ENST00000481060,ENST00000498707	ADAMTS9.aAug10,ADAMTS9.bAug10,ADAMTS9.eAug10,ADAMTS9.kAug10	uc003dmg.2,uc011bfo.1,uc011bfp.1	0.901905	0.330497
7:111634286:+,7:111638503:+	1.36625	0.714169	5.17399	4.41045e-06	6.2141e-05	4.06376	DOCK4	core	NM_014705	ENST00000342288,ENST00000352877,ENST00000428084,ENST00000437633,ENST00000445943,ENST00000468571,ENST00000476846,ENST00000544250	DOCK4.aAug10,DOCK4.bAug10,DOCK4.dAug10,DOCK4.gAug10,DOCK4.iAug10	uc003vfx.2,uc003vfy.2,uc003vga.1,uc003vgb.1,uc010ljt.1	1.92237	-0.556128
2:136873482:+,2:136875616:+	2.98832	-1.12747	5.17243	4.43416e-06	6.24032e-05	2.54801	CXCR4	core	NM_003467	ENST00000241393,ENST00000537957	CXCR4.bAug10	uc002tuz.2	2.99751	-0.00918812
11:117099066:+,11:117100093:+	1.14706	1.42821	5.16822	4.49878e-06	6.31883e-05	4.09979	PCSK7	core	NM_004716	ENST00000320934,ENST00000525027,ENST00000543900	PCSK7.aAug10,PCSK7.gAug10,PCSK7.lAug10	uc001pqr.2	0.831309	0.315752
11:110030215:+,11:110033998:+	1.56702	0.507217	5.16679	4.52101e-06	6.34384e-05	3.9046	ZC3H12C	core	NM_033390	ENST00000278590,ENST00000453089,ENST00000528673	ZC3H12C.aAug10,ZC3H12C.bAug10,ZC3H12C.cAug10	uc001pkr.3,uc009yxw.2,uc010rwc.1,uc010rwd.1	0.999443	0.567574
10:61874089:+,10:61894029:+	1.61008	-0.40385	5.16567	4.53841e-06	6.36648e-05	3.90298	ANK3	core	NM_001149,NM_001204403,NM_001204404,NM_020987	ENST00000280772,ENST00000355288,ENST00000373815,ENST00000373817,ENST00000373827,ENST00000395293,ENST00000395299,ENST00000395302,ENST00000395304,ENST00000423532,ENST00000503366,ENST00000510495,ENST00000513049,ENST00000536348,ENST00000544789	ANK3.aAug10,ANK3.bAug10,ANK3.cAug10,ANK3.dAug10,ANK3.eAug10,ANK3.fAug10,ANK3.gAug10,ANK3.hAug10,ANK3.iAug10,ANK3.kAug10,ANK3.pAug10,ANK3.vgAug10,ANK3.viAug10	uc001jkw.2,uc001jkx.2,uc001jky.2,uc001jkz.3,uc001jla.1,uc001jlb.1,uc009xpa.2,uc010qih.1	1.6071	0.00297211
2:215848589:+,2:215851266:+	2.03657	-0.926438	5.16468	4.55384e-06	6.38633e-05	3.54436	ABCA12	core	NM_015657,NM_173076	ENST00000272895,ENST00000389661	ABCA12.aAug10,ABCA12.bAug10,ABCA12.cAug10	uc002vev.2,uc002vew.2,uc010zjn.1	1.49642	0.540144
19:4702728:+,19:4703898:+	1.11097	1.2842	5.16287	4.58227e-06	6.41992e-05	4.08042	DPP9	core	NM_139159	ENST00000262960,ENST00000357909,ENST00000381797	DPP9.aAug10,DPP9.bAug10,DPP9.cAug10,DPP9.dAug10,DPP9.eAug10,DPP9.fAug10,DPP9.jAug10	uc002mba.2,uc002mbb.2,uc002mbc.2	0.650476	0.460494
7:95705509:+,7:95709675:+	1.56369	0.400861	5.16016	4.6252e-06	6.47554e-05	3.89151	DYNC1I1	core	NM_001135556,NM_001135557,NM_004411	ENST00000324972,ENST00000359388,ENST00000437599,ENST00000447467,ENST00000457059,ENST00000537881	DYNC1I1.aAug10,DYNC1I1.bAug10,DYNC1I1.cAug10,DYNC1I1.dAug10,DYNC1I1.eAug10,DYNC1I1.fAug10	uc003uob.2,uc003uoc.3,uc003uod.3,uc003uoe.3,uc010lfl.2	1.22445	0.339237
17:39928114:+,17:39942840:+	1.03057	1.77308	5.15683	4.6784e-06	6.53542e-05	4.06283	JUP	core	NM_002230,NM_021991	ENST00000310706,ENST00000393931	JUP.bAug10,JUP.cAug10	uc002hxr.2,uc002hxs.2	0.775769	0.2548
3:3084847:+,3:3085276:+	1.42665	0.595935	5.14982	4.79243e-06	6.66869e-05	3.93416	CNTN4	core	NM_001206955,NM_001206956,NM_175607,NM_175613	ENST00000358480,ENST00000397459,ENST00000397461,ENST00000418658,ENST00000427331,ENST00000448906,ENST00000484686	CNTN4.aAug10,CNTN4.bAug10,CNTN4.dAug10,CNTN4.eAug10,CNTN4.gAug10	uc003bpc.2,uc003bpe.2,uc003bpf.2,uc003bpg.2	1.06573	0.360919
11:20950025:+,11:20959332:+	1.53322	-0.23104	5.14856	4.81326e-06	6.69117e-05	3.89077	NELL1	core	NM_006157,NM_201551	ENST00000298925,ENST00000325319,ENST00000357134,ENST00000532434	NELL1.aAug10,NELL1.bAug10,NELL1.cAug10,NELL1.dAug10	uc001mqe.2,uc001mqf.2,uc009yid.2,uc010rdo.1,uc010rdp.1	1.41287	0.12035
6:145160420:+,6:145161876:+	1.06109	1.15607	5.14545	4.86491e-06	6.75829e-05	4.03038	UTRN	core	NM_007124	ENST00000367526,ENST00000367545,ENST00000460618	UTRN.aAug10,UTRN.dAug10,UTRN.eAug10,UTRN.sAug10	uc003qkt.2	0.847478	0.213608
3:64582667:+,3:64587620:+	1.56828	0.288524	5.14435	4.88321e-06	6.77902e-05	3.90037	ADAMTS9	core	NM_182920	ENST00000295903,ENST00000481060,ENST00000482490,ENST00000498707	ADAMTS9.aAug10,ADAMTS9.bAug10,ADAMTS9.cAug10,ADAMTS9.eAug10	uc003dmg.2,uc003dmh.1,uc011bfo.1,uc011bfp.1	0.901905	0.666374
6:25669795:+,6:25670227:+	2.56483	-1.48625	5.14343	4.89872e-06	6.79396e-05	2.95475	SCGN	core	NM_006998	ENST00000334979,ENST00000377961	SCGN.aAug10,SCGN.bAug10,SCGN.cAug10	uc003nfb.2,uc010jpz.2	2.289	0.275831
13:35615301:+,13:35619084:+	1.17372	1.37144	5.1415	4.93123e-06	6.82771e-05	4.00686	NBEA	core	NM_015678	ENST00000310336,ENST00000379939,ENST00000400445,ENST00000402346,ENST00000422518,ENST00000540320	NBEA.aAug10	uc001uvb.2	0.799454	0.374264
11:112099396:+,11:112101349:+	1.46029	0.934512	5.14029	4.95186e-06	6.85248e-05	3.88689	PTS	extended	None	ENST00000528679,ENST00000531673	PTS.dAug10,PTS.iAug10	uc009yyo.2	0.307747	1.15254
19:47910228:+,19:47910336:+	1.03924	1.38325	5.13962	4.96316e-06	6.86434e-05	4.01145	MEIS3	core	NM_001009813,NM_020160	ENST00000331559,ENST00000437609,ENST00000441740,ENST00000558555,ENST00000559524,ENST00000559688,ENST00000560245,ENST00000560253,ENST00000561096,ENST00000561204,ENST00000561293	MEIS3.aAug10,MEIS3.bAug10,MEIS3.cAug10,MEIS3.dAug10,MEIS3.eAug10,MEIS3.fAug10,MEIS3.gAug10,MEIS3.hAug10,MEIS3.iAug10,MEIS3.kAug10,MEIS3.oAug10,MEIS3.pAug10	uc002pgo.2,uc002pgp.2,uc002pgq.2,uc002pgr.2,uc002pgs.2,uc002pgt.2,uc002pgu.2,uc002pgv.2,uc010eld.2	0.697922	0.341319
5:24537783:+,5:24593369:+	1.55228	0.228519	5.13954	4.96453e-06	6.86529e-05	3.83563	CDH10	core	NM_006727	ENST00000264463,ENST00000510477	CDH10.aAug10,CDH10.bAug10	uc003jgr.1,uc011cnu.1	1.50966	0.0426256
12:104480792:+,12:104481764:+	1.41724	0.548962	5.13843	4.98348e-06	6.88295e-05	3.91905	HCFC2	core	NM_013320	ENST00000229330	HCFC2.aAug10	uc001tkj.3	1.09596	0.321281
9:2651954:+,9:2652780:+	1.20189	0.969519	5.13814	4.98858e-06	6.88903e-05	3.98513	VLDLR	core	NM_001018056,NM_003383	ENST00000382092,ENST00000382099,ENST00000382100	VLDLR.aAug10,VLDLR.bAug10,VLDLR.cAug10,VLDLR.dAug10,VLDLR.gAug10	uc003zhk.1,uc003zhl.1,uc003zhm.1,uc003zhn.1	0.867001	0.334888
9:130075838:+,9:130080342:+	1.2663	0.671509	5.13783	4.99382e-06	6.89438e-05	3.97637	GARNL3	core	NM_032293	ENST00000314904,ENST00000373386,ENST00000373387,ENST00000373399,ENST00000425970,ENST00000429629,ENST00000435213,ENST00000439286,ENST00000441134,ENST00000464616,ENST00000478702,ENST00000485331,ENST00000495172,ENST00000498801	GARNL3.aAug10,GARNL3.bAug10,GARNL3.cAug10,GARNL3.dAug10,GARNL3.eAug10,GARNL3.fAug10,GARNL3.gAug10,GARNL3.hAug10,GARNL3.lAug10,GARNL3.rAug10,GARNL3.tAug10,GARNL3.uAug10	uc011mad.1,uc011mae.1	1.07706	0.189231
7:95606913:+,7:95614127:+	1.34337	0.805468	5.1373	5.00295e-06	6.90177e-05	3.93196	DYNC1I1	core	NM_001135556,NM_001135557,NM_004411	ENST00000324972,ENST00000359388,ENST00000437599,ENST00000447467,ENST00000457059,ENST00000519371,ENST00000537881	DYNC1I1.aAug10,DYNC1I1.bAug10,DYNC1I1.cAug10,DYNC1I1.dAug10,DYNC1I1.eAug10,DYNC1I1.fAug10,DYNC1I1.hAug10,DYNC1I1.tAug10	uc003uob.2,uc003uoc.3,uc003uod.3,uc003uoe.3,uc010lfl.2	1.22445	0.118915
20:60735017:+,20:60736492:+	1.159	0.960517	5.12718	5.1797e-06	7.11376e-05	3.95865	SS18L1	core	NM_198935	ENST00000331758,ENST00000370848,ENST00000421564,ENST00000450482	SS18L1.aAug10,SS18L1.bAug10,SS18L1.cAug10,SS18L1.dAug10,SS18L1.eAug10,SS18L1.gAug10	uc002ybz.1,uc002yca.1,uc002ycb.2,uc011aaa.1	0.78091	0.378089
17:7489396:+,17:7489974:+	2.92315	-1.7005	5.12692	5.1844e-06	7.11819e-05	2.38983	MPDU1	extended	None	None	MPDU1.oAug10,MPDU1.rAug10,MPDU1.sAug10,MPDU1.tAug10	None	0.393142	2.53001
12:104495931:+,12:104496737:+	1.56252	0.29108	5.12688	5.18505e-06	7.11819e-05	3.8033	HCFC2	core	NM_013320	ENST00000229330,ENST00000544223,ENST00000550335,ENST00000552343	HCFC2.aAug10,HCFC2.bAug10,HCFC2.dAug10,HCFC2.eAug10,HCFC2.hAug10	uc001tkj.3,uc009zul.2	1.09596	0.466563
17:40660607:+,17:40665879:+	1.20332	0.687405	5.12461	5.22561e-06	7.16406e-05	3.94825	ATP6V0A1	core	NM_001130021	ENST00000343619,ENST00000544137	ATP6V0A1.aAug10,ATP6V0A1.cAug10,ATP6V0A1.dAug10,ATP6V0A1.gAug10,ATP6V0A1.lAug10,ATP6V0A1.sAug10	uc002hzr.2,uc010cyg.2,uc010wgj.1,uc010wgl.1	0.961028	0.242297
3:64580110:+,3:64582506:+	1.26677	0.554871	5.1239	5.23829e-06	7.1785e-05	3.93356	ADAMTS9	core	NM_182920	ENST00000295903,ENST00000481060,ENST00000482490,ENST00000498707	ADAMTS9.aAug10,ADAMTS9.bAug10,ADAMTS9.cAug10,ADAMTS9.eAug10	uc003dmg.2,uc003dmh.1,uc011bfo.1,uc011bfp.1	0.901905	0.364867
3:64601161:+,3:64601636:+	1.0318	1.05778	5.12209	5.27095e-06	7.21764e-05	3.95574	ADAMTS9	core	NM_182920	ENST00000295903,ENST00000475557,ENST00000481060,ENST00000482490,ENST00000498707	ADAMTS9.aAug10,ADAMTS9.bAug10,ADAMTS9.cAug10,ADAMTS9.dAug10,ADAMTS9.eAug10	uc003dmg.2,uc003dmh.1,uc003dmk.1,uc011bfo.1,uc011bfp.1	0.901905	0.129899
15:89164613:+,15:89169377:+	1.09202	1.43204	5.12062	5.29765e-06	7.24993e-05	3.95063	AEN	core	NM_022767	ENST00000332810,ENST00000379231,ENST00000557787	AEN.bAug10,AEN.cAug10	uc002bmt.2,uc010bnl.2	0.959391	0.132633
12:19408099:+,12:19410367:+	1.07938	1.44102	5.11738	5.35677e-06	7.32084e-05	3.94066	PLEKHA5	core	NM_001143821,NM_019012	ENST00000299275,ENST00000309364,ENST00000317589,ENST00000355397,ENST00000359180,ENST00000412219,ENST00000424268,ENST00000429027,ENST00000536974,ENST00000538034,ENST00000538305,ENST00000538714,ENST00000539256,ENST00000542828,ENST00000543806	PLEKHA5.aAug10,PLEKHA5.bAug10,PLEKHA5.cAug10,PLEKHA5.dAug10,PLEKHA5.eAug10,PLEKHA5.fAug10,PLEKHA5.gAug10,PLEKHA5.iAug10,PLEKHA5.mAug10	uc001rea.2,uc001reb.2,uc009zin.2,uc010sie.1,uc010sif.1,uc010sig.1,uc010sih.1	1.25147	-0.17209
5:161495112:+,5:161520834:+	1.66763	-1.01662	5.11706	5.36265e-06	7.32788e-05	3.68103	GABRG2	core	NM_000816,NM_198903,NM_198904	ENST00000356592,ENST00000361925,ENST00000414552,ENST00000522990	GABRG2.aAug10,GABRG2.bAug10,GABRG2.cAug10,GABRG2.dAug10,GABRG2.fAug10	uc003lyy.3,uc003lyz.3,uc010jjc.2	1.48611	0.181524
16:1816649:+,16:1816724:+	1.28167	1.31155	5.11672	5.36889e-06	7.33441e-05	3.90922	MAPK8IP3	core	NM_001040439,NM_015133	ENST00000250894,ENST00000356010	MAPK8IP3.aAug10,MAPK8IP3.bAug10,MAPK8IP3.cAug10,MAPK8IP3.kAug10	uc002cmk.2,uc002cml.2,uc010uvl.1	1.14252	0.139158
5:161522568:+,5:161524644:+	1.45539	-0.658585	5.11348	5.42885e-06	7.4032e-05	3.79949	GABRG2	core	NM_000816,NM_198903,NM_198904	ENST00000356592,ENST00000361925,ENST00000393933,ENST00000414552,ENST00000522053,ENST00000523372	GABRG2.aAug10,GABRG2.bAug10,GABRG2.cAug10,GABRG2.dAug10,GABRG2.eAug10,GABRG2.gAug10,GABRG2.hAug10	uc003lyy.3,uc003lyz.3,uc010jjc.2,uc011dej.1	1.48611	-0.0307174
11:118981390:+,11:118981557:+	1.17041	1.43802	5.11187	5.45899e-06	7.43723e-05	3.91076	C2CD2L	core	NM_014807	ENST00000336702,ENST00000529874	C2CD2L.aAug10,C2CD2L.bAug10,C2CD2L.cAug10,C2CD2L.eAug10	uc001pvn.2,uc001pvo.2	1.13942	0.0309917
2:112834859:+,2:112838634:+	1.48369	0.772347	5.11176	5.46096e-06	7.43789e-05	3.77382	TMEM87B	core	NM_032824	ENST00000283206,ENST00000452614	TMEM87B.aAug10,TMEM87B.cAug10	uc002thm.2,uc010fkg.2	1.73822	-0.254526
1:156164038:+,1:156169626:+	1.15413	1.10495	5.10719	5.54726e-06	7.54108e-05	3.9042	SLC25A44	core	NM_014655	ENST00000359511,ENST00000412949,ENST00000423538	SLC25A44.aAug10,SLC25A44.bAug10,SLC25A44.cAug10	uc001fnp.2,uc009wrr.2,uc010phc.1	1.18865	-0.0345248
1:151688457:+,1:151689231:+	1.84416	0.121844	5.10464	5.59592e-06	7.5959e-05	3.56066	CELF3	extended	None	ENST00000420342,ENST00000478829	CELF3.dAug10,CELF3.hAug10	uc001eyt.2	2.01186	-0.167705
3:27436260:+,3:27436445:+	1.00354	1.47456	5.10396	5.6091e-06	7.61069e-05	3.89711	SLC4A7	core	NM_003615	ENST00000295736,ENST00000388777,ENST00000419036,ENST00000425128,ENST00000428179,ENST00000428386,ENST00000435667,ENST00000437179,ENST00000437266,ENST00000438530,ENST00000440156,ENST00000445684,ENST00000446700,ENST00000454389,ENST00000455077,ENST00000457377	SLC4A7.aAug10,SLC4A7.bAug10,SLC4A7.cAug10,SLC4A7.dAug10,SLC4A7.eAug10,SLC4A7.fAug10,SLC4A7.gAug10,SLC4A7.hAug10,SLC4A7.iAug10,SLC4A7.jAug10,SLC4A7.kAug10,SLC4A7.lAug10,SLC4A7.mAug10,SLC4A7.nAug10,SLC4A7.oAug10,SLC4A7.pAug10	uc003cdu.3,uc003cdv.2,uc003cdw.2,uc010hfl.2,uc011awu.1,uc011awv.1,uc011aww.1,uc011awx.1,uc011awy.1,uc011awz.1,uc011axa.1,uc011axb.1	0.688662	0.314875
1:153751361:+,1:153751590:+	1.32587	0.863904	5.10298	5.62784e-06	7.632e-05	3.82739	SLC27A3	core	NM_024330	ENST00000271857,ENST00000368661,ENST00000458027,ENST00000468044,ENST00000484014,ENST00000524676,ENST00000532853	SLC27A3.aAug10,SLC27A3.bAug10,SLC27A3.dAug10,SLC27A3.eAug10	uc001fcz.2,uc009won.2	1.62818	-0.30231
16:1817736:+,16:1817806:+	1.17784	1.63477	5.10227	5.64158e-06	7.64696e-05	3.89121	MAPK8IP3	core	NM_001040439,NM_015133	ENST00000250894,ENST00000356010	MAPK8IP3.aAug10,MAPK8IP3.bAug10,MAPK8IP3.cAug10,MAPK8IP3.dAug10,MAPK8IP3.jAug10	uc002cmk.2,uc002cml.2,uc010uvl.1	1.14252	0.0353188
12:6935518:+,12:6935818:+	1.32381	0.787106	5.10156	5.65532e-06	7.66097e-05	3.86151	GPR162	core	NM_014449,NM_019858	ENST00000311268,ENST00000382315,ENST00000428545	GPR162.aAug10,GPR162.cAug10,GPR162.dAug10,GPR162.eAug10	uc001qqw.1,uc001qqx.1,uc009zfd.1	1.33922	-0.0154116
12:58024301:+,12:58024763:+	1.48379	0.324533	5.09839	5.71723e-06	7.73229e-05	3.76964	B4GALNT1	core	NM_001478	ENST00000341156,ENST00000418555,ENST00000449184,ENST00000548888,ENST00000549391,ENST00000550764,ENST00000552219,ENST00000552350,ENST00000553142	B4GALNT1.aAug10,B4GALNT1.bAug10,B4GALNT1.cAug10,B4GALNT1.dAug10,B4GALNT1.eAug10,B4GALNT1.fAug10,B4GALNT1.gAug10,B4GALNT1.hAug10,B4GALNT1.pAug10	uc001spg.1,uc001sph.2,uc001spi.2,uc010sru.1,uc010srv.1	1.42806	0.0557297
7:111382188:+,7:111386390:+	1.59173	0.111369	5.09367	5.81043e-06	7.83509e-05	3.66622	DOCK4	core	NM_014705	ENST00000342288,ENST00000352877,ENST00000423057,ENST00000428084,ENST00000437633,ENST00000445943,ENST00000494651	DOCK4.aAug10,DOCK4.bAug10,DOCK4.cAug10,DOCK4.eAug10,DOCK4.fAug10	uc003vfw.2,uc003vfx.2,uc003vfy.2,uc011kml.1,uc011kmm.1	1.92237	-0.330643
2:165970480:+,2:165971965:+	2.42821	-0.531154	5.09278	5.82813e-06	7.85685e-05	3.08066	SCN3A	core	NM_001081676,NM_001081677,NM_006922	ENST00000283254,ENST00000360093,ENST00000409101,ENST00000440431	SCN3A.aAug10,SCN3A.bAug10,SCN3A.cAug10,SCN3A.dAug10,SCN3A.eAug10	uc002ucx.2,uc002ucy.2,uc002ucz.2,uc002uda.1,uc002udb.1	1.32951	1.0987
12:83359523:+,12:83360698:+	1.72148	0.196732	5.09263	5.83109e-06	7.85978e-05	3.54437	TMTC2	core	NM_152588	ENST00000321196,ENST00000546590,ENST00000549919,ENST00000551915	TMTC2.aAug10,TMTC2.bAug10,TMTC2.cAug10,TMTC2.eAug10	uc001szs.1,uc001szt.2,uc010suk.1	1.54216	0.179328
7:111398846:+,7:111400237:+	1.64706	0.0148397	5.08575	5.97019e-06	8.02246e-05	3.61529	DOCK4	core	NM_014705	ENST00000342288,ENST00000352877,ENST00000423057,ENST00000428084,ENST00000437633,ENST00000445943,ENST00000494651	DOCK4.aAug10,DOCK4.bAug10,DOCK4.cAug10,DOCK4.eAug10,DOCK4.fAug10	uc003vfw.2,uc003vfx.2,uc003vfy.2,uc011kml.1,uc011kmm.1	1.92237	-0.275313
1:208266245:+,1:208269374:+	1.88998	0.254908	5.08485	5.98847e-06	8.04055e-05	3.37514	PLXNA2	core	NM_025179	ENST00000367033	PLXNA2.aAug10	uc001hgz.2	1.33599	0.553983
2:215809828:+,2:215812146:+	1.7528	-0.616116	5.08415	6.00291e-06	8.05779e-05	3.50082	ABCA12	core	NM_015657,NM_173076	ENST00000272895,ENST00000389661	ABCA12.aAug10,ABCA12.bAug10,ABCA12.cAug10	uc002vev.2,uc002vew.2,uc010zjn.1	1.49642	0.256376
6:166902409:+,6:166904159:+	1.34281	1.09397	5.08075	6.07323e-06	8.14019e-05	3.76861	RPS6KA2	core	NM_001006932,NM_021135	ENST00000265678,ENST00000366863,ENST00000366865,ENST00000405189,ENST00000481261,ENST00000503859,ENST00000510118	RNASET2andRPS6KA2.aAug10,RNASET2andRPS6KA2.bAug10,RNASET2andRPS6KA2.cAug10,RNASET2andRPS6KA2.dAug10,RNASET2andRPS6KA2.eAug10,RNASET2andRPS6KA2.jAug10,RNASET2andRPS6KA2.oAug10	uc003qvb.1,uc003qvc.1,uc003qvd.1,uc010kkl.1,uc011ego.1	1.39312	-0.0503069
9:115449913:+,9:115451807:+	1.26538	1.19656	5.08061	6.07617e-06	8.14202e-05	3.79831	C9orf80	core	NM_021218	ENST00000374236,ENST00000374242,ENST00000497712	C9orf80.aAug10,C9orf80.bAug10,C9orf80.fAug10,C9orf80.hAug10,C9orf80.iAug10	uc004bgg.2	1.14703	0.118356
10:61959985:+,10:61962760:+	1.9676	-0.584125	5.07432	6.2083e-06	8.28577e-05	3.41549	ANK3	core	NM_001204403,NM_001204404,NM_020987	ENST00000280772,ENST00000373827,ENST00000395293,ENST00000395299,ENST00000395302,ENST00000395304,ENST00000503366	ANK3.aAug10,ANK3.bAug10,ANK3.cAug10,ANK3.dAug10	uc001jky.2,uc001jkz.3,uc001jlc.1,uc010qih.1	1.6071	0.360497
5:170723018:+,5:170725766:+	1.12983	0.55706	5.0729	6.23868e-06	8.32189e-05	3.79538	RANBP17	core	NM_022897	ENST00000389118,ENST00000519949,ENST00000521759,ENST00000522066,ENST00000522533,ENST00000523189,ENST00000534916	RANBP17.aAug10,RANBP17.bAug10,RANBP17.cAug10,RANBP17.dAug10,RANBP17.eAug10,RANBP17.hAug10	uc003mba.2,uc003mbb.2,uc010jjs.2	0.379644	0.750188
7:87754974:+,7:87757917:+	1.04337	1.40697	5.07006	6.29959e-06	8.38945e-05	3.79019	ADAM22	core	NM_004194,NM_016351,NM_021721,NM_021722,NM_021723	ENST00000265727,ENST00000315984,ENST00000398201,ENST00000398203,ENST00000398204,ENST00000398209,ENST00000439864,ENST00000478920	ADAM22.aAug10,ADAM22.bAug10,ADAM22.cAug10,ADAM22.dAug10,ADAM22.eAug10,ADAM22.fAug10,ADAM22.gAug10,ADAM22.hAug10,ADAM22.lAug10	uc003uji.1,uc003ujj.1,uc003ujk.1,uc003ujl.1,uc003ujm.2,uc003ujn.2,uc003ujo.2,uc003ujp.1	0.632937	0.410437
10:61865817:+,10:61868588:+	1.73634	-0.493061	5.06475	6.41496e-06	8.51865e-05	3.44905	ANK3	core	NM_001149,NM_001204403,NM_001204404,NM_020987	ENST00000280772,ENST00000355288,ENST00000373815,ENST00000373817,ENST00000373827,ENST00000395293,ENST00000395299,ENST00000395302,ENST00000395304,ENST00000423532,ENST00000503366,ENST00000510495,ENST00000536348,ENST00000544789	ANK3.aAug10,ANK3.bAug10,ANK3.cAug10,ANK3.dAug10,ANK3.eAug10,ANK3.fAug10,ANK3.gAug10,ANK3.hAug10,ANK3.iAug10,ANK3.pAug10	uc001jkw.2,uc001jkx.2,uc001jky.2,uc001jkz.3,uc001jla.1,uc001jlb.1,uc009xpa.2,uc010qih.1	1.6071	0.129241
2:71220905:+,2:71221818:+	1.1551	1.17692	5.06033	6.51269e-06	8.63112e-05	3.75612	TEX261	core	NM_144582	ENST00000272438,ENST00000433258,ENST00000453130,ENST00000473055,ENST00000489894	TEX261.aAug10,TEX261.bAug10,TEX261.dAug10,TEX261.fAug10	uc002shn.2	1.00829	0.146808
7:14881075:+,7:14942217:+	2.23856	-0.889331	5.0602	6.51558e-06	8.63381e-05	3.03173	DGKB	extended	None	ENST00000402815,ENST00000403963,ENST00000407950,ENST00000444700,ENST00000477401	DGKB.aAug10,DGKB.cAug10	uc011jxt.1,uc011jxv.1	0.574854	1.6637
1:33333443:+,1:33333791:+	1.89011	-0.323896	5.05769	6.5719e-06	8.69465e-05	3.34289	FNDC5	core	NM_001171940,NM_001171941,NM_153756	ENST00000373470,ENST00000373471,ENST00000496770	FNDC5.aAug10,FNDC5.bAug10,FNDC5.cAug10,FNDC5.dAug10	uc001bwf.1,uc001bwg.2	1.93926	-0.0491513
18:32585517:+,18:32650159:+	2.04191	-0.262172	5.05339	6.66921e-06	8.80132e-05	3.16138	MAPRE2	core	NM_001143826,NM_001143827	ENST00000413393,ENST00000436190	MAPRE2.aAug10,MAPRE2.cAug10,MAPRE2.qAug10	uc010xcb.1,uc010xcc.1	1.03966	1.00224
2:215876373:+,2:215876695:+	1.85647	-0.553156	5.05007	6.74545e-06	8.87972e-05	3.34405	ABCA12	core	NM_015657,NM_173076	ENST00000272895,ENST00000389661	ABCA12.aAug10,ABCA12.bAug10,ABCA12.cAug10	uc002vev.2,uc002vew.2,uc010zjn.1	1.49642	0.360046
3:2944689:+,3:2967313:+	1.30718	0.511573	5.04982	6.75113e-06	8.88486e-05	3.67049	CNTN4	core	NM_001206955,NM_001206956,NM_175607,NM_175613	ENST00000358480,ENST00000397459,ENST00000397461,ENST00000418658,ENST00000427331,ENST00000427741,ENST00000430505,ENST00000438282,ENST00000448906,ENST00000473845,ENST00000475817	CNTN4.aAug10,CNTN4.bAug10,CNTN4.cAug10,CNTN4.dAug10,CNTN4.eAug10,CNTN4.fAug10,CNTN4.hAug10,CNTN4.iAug10	uc003bpb.1,uc003bpc.2,uc003bpd.1,uc003bpe.2,uc003bpf.2	1.06573	0.241451
X:131520839:+,X:131524875:+	1.86528	-0.0976947	5.04976	6.75258e-06	8.88561e-05	3.31104	MBNL3	core	NM_001170701,NM_001170702,NM_001170703,NM_001170704,NM_018388	ENST00000370844,ENST00000370849,ENST00000370853,ENST00000370857,ENST00000394311,ENST00000421707,ENST00000436215,ENST00000442191,ENST00000538204	MBNL3.aAug10,MBNL3.cAug10,MBNL3.dAug10,MBNL3.eAug10,MBNL3.fAug10,MBNL3.gAug10,MBNL3.hAug10,MBNL3.iAug10,MBNL3.jAug10	uc004ews.2,uc004ewt.2,uc004ewv.3,uc004eww.2,uc004ewx.1,uc011muz.1	1.56261	0.302671
10:99504672:+,10:99508026:+	1.406	0.792637	5.04919	6.76571e-06	8.90055e-05	3.62701	ZFYVE27	core	NM_001002261,NM_001002262,NM_001174119,NM_001174121,NM_144588	ENST00000337540,ENST00000356257,ENST00000359980,ENST00000370610,ENST00000393677,ENST00000423811,ENST00000453958,ENST00000497994	ZFYVE27.aAug10,ZFYVE27.bAug10,ZFYVE27.cAug10,ZFYVE27.dAug10,ZFYVE27.eAug10,ZFYVE27.gAug10,ZFYVE27.hAug10,ZFYVE27.iAug10,ZFYVE27.kAug10,ZFYVE27.mAug10,ZFYVE27.uAug10,ZFYVE27.vaAug10,ZFYVE27.vhAug10	uc001kok.1,uc001kol.1,uc001kom.1,uc001kon.2,uc001koo.2,uc001kop.2,uc010qpb.1,uc010qpc.1,uc010qpd.1	1.19552	0.210478
4:90756843:+,4:90758113:+	1.17572	1.17774	5.04498	6.86374e-06	9.01177e-05	3.69618	SNCA	core	NM_000345	ENST00000394989,ENST00000394991	SNCA.eAug10	uc003hsp.2	0.867323	0.308399
3:105421303:+,3:105422832:+	1.02985	1.32163	5.04077	6.96314e-06	9.12197e-05	3.69724	CBLB	core	NM_170662	ENST00000264122,ENST00000394027,ENST00000403724,ENST00000405772	CBLB.aAug10,CBLB.bAug10,CBLB.cAug10,CBLB.dAug10	uc003dwc.2,uc003dwd.1,uc003dwe.1,uc011bhi.1	0.651176	0.378675
2:112849360:+,2:112854621:+	1.68018	0.683269	5.03823	7.02399e-06	9.19087e-05	3.42816	TMEM87B	core	NM_032824	ENST00000283206,ENST00000463427,ENST00000471632	TMEM87B.aAug10,TMEM87B.bAug10,TMEM87B.dAug10	uc002thm.2	1.73822	-0.0580364
9:2643959:+,9:2644734:+	1.25666	0.794012	5.03756	7.03992e-06	9.20931e-05	3.66142	VLDLR	core	NM_001018056,NM_003383	ENST00000382092,ENST00000382099,ENST00000382100	VLDLR.aAug10,VLDLR.bAug10,VLDLR.cAug10	uc003zhk.1,uc003zhl.1,uc003zhm.1,uc003zhn.1	0.867001	0.389662
11:123480621:+,11:123480904:+	1.15793	1.0752	5.03289	7.15326e-06	9.33505e-05	3.66344	GRAMD1B	core	NM_020716	ENST00000322282,ENST00000450171,ENST00000456860,ENST00000529432,ENST00000529750,ENST00000532581,ENST00000539133	GRAMD1B.aAug10,GRAMD1B.bAug10,GRAMD1B.cAug10,GRAMD1B.dAug10,GRAMD1B.eAug10,GRAMD1B.gAug10	uc001pyw.2,uc001pyx.2,uc001pyy.2,uc010rzw.1,uc010rzx.1	0.796256	0.361679
11:133791292:+,11:133792072:+	2.03671	0.0829221	5.02835	7.26491e-06	9.45797e-05	3.10423	IGSF9B	core	NM_014987	ENST00000321016,ENST00000533871	IGSF9B.aAug10	uc001qgx.3	0.920494	1.11622
4:21600811:+,4:21610074:+	2.72552	-1.51369	5.0275	7.28613e-06	9.4819e-05	2.49083	KCNIP4	novel	NONE	NONE	NONE	NONE	0.225076	2.50044
11:118978805:+,11:118980814:+	1.089	1.37708	5.02746	7.28708e-06	9.48191e-05	3.65224	C2CD2L	core	NM_014807	ENST00000336702	C2CD2L.aAug10,C2CD2L.bAug10	uc001pvn.2,uc001pvo.2	1.13942	-0.0504175
X:19026241:+,X:19027744:+	1.25396	0.683858	5.02139	7.43961e-06	9.64782e-05	3.61071	GPR64	core	NM_001079858,NM_001079859,NM_001079860,NM_001184833,NM_001184834,NM_001184835,NM_001184836,NM_001184837,NM_005756	ENST00000354791,ENST00000356606,ENST00000357544,ENST00000357991,ENST00000360279,ENST00000379869,ENST00000379873,ENST00000379876,ENST00000379878,ENST00000397917	GPR64.aAug10,GPR64.bAug10,GPR64.cAug10,GPR64.dAug10,GPR64.eAug10,GPR64.fAug10,GPR64.gAug10,GPR64.hAug10,GPR64.iAug10,GPR64.jAug10	uc004cyw.2,uc004cyx.2,uc004cyy.2,uc004cyz.2,uc004cza.2,uc004czb.2,uc004czc.2,uc004czd.2,uc004cze.2,uc004czf.2	1.29067	-0.0367132
10:61926654:+,10:61932066:+	1.58348	-0.0708567	5.02056	7.46084e-06	9.67285e-05	3.4564	ANK3	core	NM_001204403,NM_001204404,NM_020987	ENST00000280772,ENST00000373817,ENST00000373827,ENST00000395293,ENST00000395299,ENST00000395302,ENST00000395304,ENST00000503366,ENST00000510495,ENST00000536348	ANK3.aAug10,ANK3.bAug10,ANK3.cAug10,ANK3.dAug10,ANK3.eAug10,ANK3.hAug10,ANK3.vcAug10	uc001jkx.2,uc001jky.2,uc001jkz.3,uc001jlb.1,uc001jlc.1,uc010qih.1	1.6071	-0.0236256
3:178748787:+,3:178785271:+	1.50448	0.614549	5.02014	7.47152e-06	9.68293e-05	3.47042	ZMAT3	core	NM_022470,NM_152240	ENST00000311417,ENST00000414084,ENST00000432729	ZMAT3.aAug10,ZMAT3.bAug10,ZMAT3.cAug10	uc003fjg.2,uc003fji.2,uc010hxa.2	1.45106	0.0534191
11:66031423:+,11:66031517:+	1.22546	0.990029	5.01949	7.48816e-06	9.69921e-05	3.61905	KLC2	core	NM_001134774,NM_001134775,NM_001134776,NM_022822	ENST00000316924,ENST00000394065,ENST00000394066,ENST00000394067,ENST00000417856,ENST00000421552	KLC2.aAug10,KLC2.bAug10,KLC2.cAug10,KLC2.dAug10,KLC2.eAug10,KLC2.fAug10,KLC2.gAug10,KLC2.hAug10,KLC2.iAug10	uc001ohb.2,uc001ohc.2,uc001ohd.2,uc001ohe.1,uc010rov.1,uc010row.1,uc010rox.1	0.836308	0.389148
7:111452005:+,7:111462418:+	2.13101	-0.411513	5.01664	7.5614e-06	9.77793e-05	3.06734	DOCK4	core	NM_014705	ENST00000342288,ENST00000352877,ENST00000423057,ENST00000428084,ENST00000437633,ENST00000445943,ENST00000469898,ENST00000544250	DOCK4.aAug10,DOCK4.bAug10,DOCK4.cAug10	uc003vfw.2,uc003vfx.2,uc003vfy.2	1.92237	0.208636
15:74281598:+,15:74282692:+	1.92957	0.0346679	5.00634	7.83191e-06	0.000100693	3.20438	STOML1	core	NM_004809	ENST00000316900,ENST00000359750,ENST00000541638	STOML1.aAug10,STOML1.bAug10,STOML1.cAug10,STOML1.fAug10,STOML1.gAug10,STOML1.iAug10,STOML1.jAug10,STOML1.kAug10,STOML1.lAug10,STOML1.mAug10,STOML1.nAug10	uc002awe.2,uc002awf.2,uc002awi.2,uc010bje.2,uc010uld.1	1.39639	0.533187
2:215813461:+,2:215813764:+	1.84831	-0.798442	5.00039	7.99247e-06	0.000102481	3.18231	ABCA12	core	NM_015657,NM_173076	ENST00000272895,ENST00000389661	ABCA12.aAug10,ABCA12.bAug10,ABCA12.cAug10	uc002vev.2,uc002vew.2,uc010zjn.1	1.49642	0.351887
11:77991947:+,11:78128692:+	1.06995	0.998187	4.99214	8.22027e-06	0.000105013	3.54217	GAB2	core	NM_080491	ENST00000361507,ENST00000534823	GAB2.aAug10,GAB2.eAug10	uc001ozh.2	0.871042	0.198906
17:643840:+,17:644541:+	1.15525	1.14753	4.98853	8.32207e-06	0.000106136	3.52285	FAM57A	core	NM_024792	ENST00000308278,ENST00000451373	FAM57A.aAug10,FAM57A.cAug10,FAM57A.fAug10	uc002frp.2,uc002frr.2	0.811041	0.344209
12:19501453:+,12:19506818:+	1.03856	1.41493	4.98842	8.3252e-06	0.00010615	3.53159	PLEKHA5	core	NM_001143821,NM_019012	ENST00000299275,ENST00000317589,ENST00000355397,ENST00000424268,ENST00000429027,ENST00000536974,ENST00000538714,ENST00000539256,ENST00000542828,ENST00000543806	PLEKHA5.aAug10,PLEKHA5.bAug10,PLEKHA5.cAug10,PLEKHA5.dAug10,PLEKHA5.eAug10,PLEKHA5.fAug10,PLEKHA5.gAug10,PLEKHA5.hAug10,PLEKHA5.oAug10	uc001rea.2,uc001reb.2,uc001rec.1,uc009zin.2,uc010sie.1,uc010sif.1,uc010sig.1,uc010sih.1	1.25147	-0.212911
3:53346409:+,3:53353434:+	1.7145	0.230079	4.98697	8.36642e-06	0.000106581	3.22775	DCP1A	core	NM_018403	ENST00000294241,ENST00000480258,ENST00000494659,ENST00000559748,ENST00000560076,ENST00000560624	DCP1A.aAug10,DCP1A.bAug10,DCP1A.cAug10,DCP1A.dAug10,DCP1A.gAug10,DCP1A.hAug10,DCP1A.iAug10,DCP1A.jAug10,DCP1A.kAug10,DCP1A.mAug10,DCP1A.oAug10	uc003dgs.3,uc003dgt.3	1.13887	0.575626
7:111585853:+,7:111617187:+	1.66078	0.159105	4.98592	8.39667e-06	0.000106857	3.26159	DOCK4	core	NM_014705	ENST00000342288,ENST00000352877,ENST00000428084,ENST00000437633,ENST00000445943,ENST00000476846,ENST00000544250	DOCK4.aAug10,DOCK4.bAug10,DOCK4.dAug10,DOCK4.gAug10	uc003vfx.2,uc003vfy.2,uc003vga.1,uc010ljt.1	1.92237	-0.26159
18:19244191:+,18:19263881:+	1.36666	0.345349	4.98498	8.42341e-06	0.000107143	3.4357	ABHD3	core	NM_138340	ENST00000289119	ABHD3.aAug10,ABHD3.cAug10,ABHD3.dAug10	uc002ktl.2,uc010xao.1	1.00983	0.356838
17:40622236:+,17:40629678:+	1.18991	1.18095	4.98425	8.44456e-06	0.000107358	3.49744	ATP6V0A1	core	NM_001130021,NM_005177	ENST00000343619,ENST00000393829,ENST00000546249	ATP6V0A1.cAug10,ATP6V0A1.eAug10,ATP6V0A1.jAug10,ATP6V0A1.rAug10,ATP6V0A1.tAug10	uc002hzq.2,uc002hzr.2	0.961028	0.228878
2:24283796:+,2:24285934:+	1.02545	1.39745	4.98174	8.51691e-06	0.00010814	3.50731	FKBP1B	core	NM_004116	ENST00000380986,ENST00000421839,ENST00000452109	MFSD2BandFKBP1B.dAug10,MFSD2BandFKBP1B.gAug10,MFSD2BandFKBP1B.iAug10,MFSD2BandFKBP1B.lAug10	uc002rer.2,uc002reu.2	0.885258	0.140188
2:112865417:+,2:112870476:+	1.80652	0.342174	4.98055	8.55161e-06	0.000108526	3.16118	TMEM87B	core	NM_032824	ENST00000283206	TMEM87B.aAug10	uc002thm.2	1.73822	0.0683026
12:32717223:+,12:32729200:+	1.15036	1.30225	4.9796	8.57943e-06	0.000108852	3.50141	FGD4	core	NM_139241	ENST00000266482,ENST00000395740,ENST00000427716,ENST00000472289,ENST00000473513,ENST00000479023,ENST00000493087,ENST00000525053,ENST00000531134,ENST00000534526,ENST00000551984	FGD4.aAug10,FGD4.bAug10,FGD4.cAug10,FGD4.dAug10,FGD4.eAug10,FGD4.gAug10,FGD4.jAug10,FGD4.oAug10,FGD4.qAug10	uc001rkx.3,uc001rky.2,uc001rkz.2,uc001rla.2,uc001rlc.2,uc010ske.1	0.893844	0.25652
22:33245521:+,22:33253236:+	1.24953	0.973974	4.9789	8.59983e-06	0.000109083	3.46466	SYN3,TIMP3	core	NM_000362	ENST00000266085,ENST00000382049,ENST00000538671	TIMP3.aAug10,TIMP3.bAug10,TIMP3.cAug10	uc003anb.2	1.3101	-0.0605649
3:40464892:+,3:40465317:+	2.47203	-1.56535	4.97858	8.6092e-06	0.000109174	2.48673	ENTPD3	core	NM_001248	ENST00000301825,ENST00000445129,ENST00000456402	ENTPD3.aAug10,ENTPD3.bAug10,ENTPD3.cAug10	uc003ckd.3,uc010hhy.2	2.10296	0.36907
10:61815794:+,10:61819098:+	1.59286	-0.149997	4.97618	8.67982e-06	0.000109972	3.31721	ANK3	core	NM_001149,NM_001204403,NM_001204404,NM_020987	ENST00000280772,ENST00000355288,ENST00000373817,ENST00000373820,ENST00000373827,ENST00000395299,ENST00000423532,ENST00000503366	ANK3.aAug10,ANK3.bAug10,ANK3.cAug10,ANK3.eAug10,ANK3.fAug10,ANK3.gAug10,ANK3.jAug10,ANK3.lAug10,ANK3.oAug10,ANK3.qAug10,ANK3.tAug10	uc001jkv.2,uc001jkw.2,uc001jkx.2,uc001jky.2,uc001jkz.3,uc009xpa.2,uc010qih.1	1.6071	-0.0142441
10:121086123:+,10:121140327:+	1.54514	0.349815	4.97608	8.68283e-06	0.000109996	3.34385	GRK5	core	NM_005308	ENST00000392870,ENST00000457057	GRK5.aAug10,GRK5.cAug10,GRK5.fAug10,GRK5.gAug10	uc001led.2,uc009xzh.2,uc010qta.1	1.59445	-0.0493063
1:210411480:+,1:210412838:+	1.1572	0.353473	4.97436	8.73389e-06	0.000110532	3.47487	SERTAD4	core	NM_019605	ENST00000367012,ENST00000482421,ENST00000490620	SERTAD4.aAug10,SERTAD4.bAug10,SERTAD4.cAug10,SERTAD4.dAug10	uc001hhy.2,uc009xcw.2	0.581197	0.576006
2:71216147:+,2:71216879:+	1.17826	1.0995	4.97401	8.74431e-06	0.000110649	3.47089	TEX261	core	NM_144582	ENST00000272438,ENST00000433258,ENST00000466731	TEX261.aAug10,TEX261.fAug10	uc002shn.2,uc010fdy.2	1.00829	0.16996
2:202672675:+,2:202677206:+	1.67407	-0.695611	4.97254	8.78803e-06	0.000111088	3.24594	CDK15	core	NM_139158	ENST00000260967,ENST00000374598,ENST00000410091,ENST00000434439,ENST00000450471,ENST00000451080,ENST00000488419	CDK15.aAug10,CDK15.bAug10,CDK15.cAug10,CDK15.dAug10,CDK15.eAug10,CDK15.fAug10,CDK15.gAug10	uc002uys.2,uc002uyt.2,uc010ftm.2,uc010ftn.1,uc010fto.1	1.61332	0.0607582
19:40929453:+,19:40931774:+	1.61824	0.643594	4.96992	8.86698e-06	0.000111933	3.26207	SERTAD1	core	NM_013376	ENST00000357949	SERTAD1.aAug10	uc002ont.3	1.62445	-0.0062069
6:71234894:+,6:71235567:+	2.43052	-1.14371	4.96257	9.09149e-06	0.000114436	2.55591	FAM135A	extended	None	ENST00000505769	FAM135A.cAug10	uc003pfn.2	0.448185	1.98233
7:111503620:+,7:111508040:+	1.72679	-0.151718	4.96201	9.10886e-06	0.000114626	3.15773	DOCK4	core	NM_014705	ENST00000342288,ENST00000352877,ENST00000423057,ENST00000428084,ENST00000437633,ENST00000445943,ENST00000476846,ENST00000544250	DOCK4.aAug10,DOCK4.bAug10,DOCK4.cAug10,DOCK4.dAug10	uc003vfw.2,uc003vfx.2,uc003vfy.2,uc003vga.1	1.92237	-0.19558
6:166921770:+,6:166923765:+	1.0554	1.56386	4.96166	9.11961e-06	0.000114747	3.44686	RPS6KA2	core	NM_001006932,NM_021135	ENST00000265678,ENST00000366863,ENST00000366865,ENST00000405189,ENST00000481261,ENST00000503859,ENST00000506565,ENST00000507350,ENST00000507371,ENST00000510118,ENST00000512860	RNASET2andRPS6KA2.aAug10,RNASET2andRPS6KA2.bAug10,RNASET2andRPS6KA2.cAug10,RNASET2andRPS6KA2.dAug10,RNASET2andRPS6KA2.eAug10,RNASET2andRPS6KA2.jAug10	uc003qvb.1,uc003qvc.1,uc003qvd.1,uc010kkl.1,uc011ego.1	1.39312	-0.337723
22:33198108:+,22:33245439:+	1.40122	0.821219	4.95987	9.17548e-06	0.000115319	3.38074	SYN3,TIMP3	core	NM_000362	ENST00000266085,ENST00000382049,ENST00000538671	TIMP3.aAug10,TIMP3.bAug10,TIMP3.cAug10	uc003anb.2	1.3101	0.0911229
10:99497078:+,10:99498234:+	1.39173	0.768357	4.95554	9.31156e-06	0.000116714	3.33248	ZFYVE27	core	NM_001174119,NM_001174120,NM_001174122	ENST00000337540,ENST00000357540,ENST00000370613,ENST00000453958	ZFYVE27.aAug10,ZFYVE27.dAug10,ZFYVE27.iAug10,ZFYVE27.jAug10,ZFYVE27.lAug10,ZFYVE27.pAug10,ZFYVE27.qAug10,ZFYVE27.vaAug10,ZFYVE27.veAug10,ZFYVE27.vgAug10,ZFYVE27.vhAug10	uc001kon.2,uc001koo.2,uc001kop.2,uc001koq.2,uc010qpa.1,uc010qpc.1,uc010qpd.1	1.19552	0.196202
12:4460543:+,12:4461426:+	1.08887	1.60228	4.95515	9.32402e-06	0.000116835	3.42667	C12orf5	core	NM_020375	ENST00000179259,ENST00000537251	C12orf5.aAug10,C12orf5.bAug10,C12orf5.dAug10	uc001qmp.2	0.860577	0.228297
7:1197386:+,7:1197794:+	1.26354	0.945021	4.95203	9.4237e-06	0.000117951	3.38204	ZFAND2A	core	NM_182491	ENST00000316495,ENST00000397083,ENST00000401903,ENST00000484977	ZFAND2A.aAug10,ZFAND2A.bAug10,ZFAND2A.cAug10,ZFAND2A.eAug10,ZFAND2A.gAug10	uc003skc.2,uc003skd.3	1.29269	-0.0291474
10:62023778:+,10:62029889:+	1.51154	-0.363425	4.94571	9.62829e-06	0.000120152	3.24185	ANK3	core	NM_001204403,NM_001204404,NM_020987	ENST00000280772,ENST00000373827,ENST00000395293,ENST00000395299,ENST00000395304,ENST00000503366,ENST00000503925,ENST00000510495	ANK3.aAug10,ANK3.bAug10,ANK3.cAug10,ANK3.hAug10,ANK3.vaAug10	uc001jky.2,uc001jkz.3,uc001jlb.1,uc010qih.1	1.6071	-0.095567
9:82320857:+,9:82323033:+	1.5202	-0.276856	4.94228	9.74141e-06	0.000121337	3.21566	TLE4	extended	None	ENST00000490347	TLE4.gAug10	None	0.700152	0.820044
1:225971070:+,1:225976961:+	1.44052	0.59464	4.93346	1.00379e-05	0.000124395	3.23938	SRP9	extended	None	None	SRP9andEPHX1.mAug10	uc001hpi.3	-0.0691436	1.50966
10:120967481:+,10:121086028:+	1.43795	0.225158	4.9299	1.01599e-05	0.000125582	3.24965	GRK5	core	NM_005308	ENST00000369106,ENST00000392870	GRK5.aAug10,GRK5.cAug10	uc001led.2,uc009xzh.2	1.59445	-0.1565
X:102585232:+,X:102585851:+	1.04092	1.04246	4.92917	1.0185e-05	0.000125861	3.34495	TCEAL7	core	NM_152278	ENST00000332431	TCEAL7.dAug10	uc004ekc.1	1.11379	-0.0728774
13:39602457:+,13:39603418:+	1.40472	0.546133	4.92909	1.0188e-05	0.000125875	3.2594	C13orf23	core	NM_025138,NM_170719	ENST00000350125,ENST00000352251,ENST00000418503,ENST00000436678	C13orf23.aAug10,C13orf23.bAug10,C13orf23.dAug10	uc001uwy.2,uc001uwz.2	1.29785	0.106861
12:133519608:+,12:133522207:+	1.50951	0.17297	4.92726	1.02516e-05	0.000126528	3.17965	ZNF605	extended	None	None	CHFRandGOLGA3.vqAug10,CHFRandGOLGA3.vxAug10	uc001ulk.1	-0.775819	2.28533
1:208219462:+,1:208224354:+	1.65334	0.433302	4.92499	1.03309e-05	0.000127303	3.07175	PLXNA2	core	NM_025179	ENST00000367033	PLXNA2.aAug10	uc001hgz.2	1.33599	0.317351
6:25689445:+,6:25689701:+	2.12977	-1.11703	4.91992	1.05104e-05	0.000129151	2.6572	SCGN	core	NM_006998	ENST00000334979,ENST00000377961	SCGN.aAug10,SCGN.cAug10	uc003nfb.2,uc010jpz.2	2.289	-0.159232
X:48762759:+,X:48763669:+	1.02703	1.38515	4.91959	1.05222e-05	0.000129263	3.31416	SLC35A2	core	NM_001042498,NM_005660	ENST00000247138,ENST00000376521,ENST00000413561,ENST00000446885,ENST00000452555	SLC35A2.aAug10,SLC35A2.bAug10,SLC35A2.cAug10,SLC35A2.dAug10,SLC35A2.eAug10,SLC35A2.fAug10,SLC35A2.gAug10,SLC35A2.kAug10,SLC35A2.nAug10	uc004dlo.1,uc004dlp.1,uc011mml.1,uc011mmm.1,uc011mmn.1	0.867531	0.159496
11:33881121:+,11:33886148:+	1.91973	0.301495	4.91739	1.06011e-05	0.000129994	2.8473	LMO2	core	NM_001142315,NM_001142316,NM_005574	ENST00000257818,ENST00000395833,ENST00000411482,ENST00000464025	LMO2.aAug10,LMO2.bAug10,LMO2.cAug10,LMO2.eAug10,LMO2.fAug10,LMO2.gAug10	uc001mvc.2,uc001mvd.2,uc001mve.2,uc010rel.1,uc010rem.1	1.28785	0.631888
2:112839095:+,2:112843582:+	1.90929	0.207271	4.91388	1.07282e-05	0.000131359	2.82508	TMEM87B	core	NM_032824	ENST00000283206	TMEM87B.aAug10	uc002thm.2	1.73822	0.171071
1:148928385:+,1:148932786:+	1.04463	0.89615	4.91354	1.07405e-05	0.000131477	3.29587	LOC645166	core	NR_027355,NR_027356	ENST00000294715,ENST00000420597,ENST00000452399,ENST00000539543	LOC645166.aAug10,LOC645166.bAug10,LOC645166.cAug10	uc010pbc.1,uc010pbd.1	1.36122	-0.316587
17:62272455:+,17:62289934:+	1.11941	1.29846	4.91052	1.08511e-05	0.000132638	3.2844	TEX2	core	NM_018469	ENST00000258991	TEX2.aAug10,TEX2.bAug10	uc002jec.2,uc002jed.2,uc002jee.2	0.521616	0.597798
2:165768258:+,2:165771622:+	2.54214	-1.70164	4.90835	1.09315e-05	0.000133408	2.20767	SLC38A11	core	NM_001199148,NM_173512	ENST00000303735,ENST00000409058,ENST00000409149,ENST00000409662,ENST00000493887	SLC38A11.aAug10,SLC38A11.bAug10,SLC38A11.cAug10,SLC38A11.gAug10	uc002ucu.1,uc002ucv.1,uc002ucw.1	2.75129	-0.209145
9:27567162:+,9:27573429:+	1.00646	1.30725	4.90781	1.09516e-05	0.000133588	3.2767	C9orf72	core	NM_018325	ENST00000380003,ENST00000488117	C9orf72.aAug10,C9orf72.bAug10,C9orf72.dAug10	uc003zqq.2	0.657842	0.348614
7:95709800:+,7:95726795:+	1.39697	0.520975	4.90635	1.10058e-05	0.000134151	3.18028	DYNC1I1	core	NM_001135556,NM_001135557,NM_004411	ENST00000324972,ENST00000359388,ENST00000437599,ENST00000447467,ENST00000457059	DYNC1I1.aAug10,DYNC1I1.bAug10,DYNC1I1.cAug10,DYNC1I1.dAug10,DYNC1I1.eAug10	uc003uob.2,uc003uoc.3,uc003uod.3,uc003uoe.3,uc010lfl.2	1.22445	0.172515
5:94044314:+,5:94046523:+	1.45132	0.216119	4.9062	1.10115e-05	0.000134176	3.1723	MCTP1	core	NM_001002796,NM_024717	ENST00000312216,ENST00000429576,ENST00000505078,ENST00000508509,ENST00000514040,ENST00000515393	MCTP1.aAug10,MCTP1.bAug10,MCTP1.cAug10,MCTP1.eAug10,MCTP1.gAug10,MCTP1.kAug10	uc003kku.2,uc003kkv.2,uc003kkw.2,uc003kkx.2	1.07511	0.376211
1:153751949:+,1:153752302:+	1.48897	0.505228	4.90619	1.10118e-05	0.000134176	3.1235	SLC27A3	core	NM_024330	ENST00000271857,ENST00000368659,ENST00000368660,ENST00000368661,ENST00000483574,ENST00000484014,ENST00000524676	SLC27A3.aAug10,SLC27A3.cAug10,SLC27A3.gAug10	uc001fcz.2,uc009won.2	1.62818	-0.139207
2:89035254:+,2:89036052:+	1.4882	0.584089	4.90389	1.10981e-05	0.000135129	3.13173	RPIA	core	NM_144563	ENST00000283646,ENST00000543560	RPIA.aAug10	uc002ste.2	1.32243	0.165771
2:88999582:+,2:89028796:+	1.47659	0.524131	4.90295	1.11335e-05	0.000135478	3.12764	RPIA	core	NM_144563	ENST00000283646	RPIA.aAug10,RPIA.bAug10	uc002ste.2	1.32243	0.154159
1:45266619:+,1:45266708:+	2.8865	-0.823849	4.90103	1.12063e-05	0.000136281	1.74214	PLK3	core	NM_004073	ENST00000372201,ENST00000465443,ENST00000543983	PLK3.aAug10	uc001cmn.2	1.65251	1.23398
2:139322563:+,2:139326506:+	1.20063	0.855331	4.89776	1.13315e-05	0.00013767	3.2309	SPOPL	core	NM_001001664	ENST00000280098,ENST00000420679	SPOPL.aAug10	uc002tvh.2	1.02589	0.174735
16:3070492:+,16:3071216:+	1.65466	0.580241	4.89039	1.1618e-05	0.000140639	3.0264	TNFRSF12A	core	NM_016639	ENST00000326577	TNFRSF12A.bAug10	uc002csv.3	1.88705	-0.232384
7:55459603:+,7:55466116:+	1.04025	1.77486	4.88989	1.16379e-05	0.000140829	3.21897	LANCL2	core	NM_018697	ENST00000254770,ENST00000452107	LANCL2.aAug10,LANCL2.eAug10	uc003tqp.2	0.804063	0.236182
6:43223382:+,6:43223469:+	2.69849	-1.29067	4.88671	1.17638e-05	0.000142044	1.99378	TTBK1	core	NM_032538	ENST00000259750,ENST00000304139,ENST00000393984	TTBK1.aAug10,TTBK1.bAug10	uc003ouq.1	2.42864	0.269848
10:20436831:+,10:20453397:+	2.36114	-0.878272	4.88574	1.18026e-05	0.000142409	2.29369	PLXDC2	core	NM_032812	ENST00000377238,ENST00000377242,ENST00000377252,ENST00000536022	PLXDC2.aAug10,PLXDC2.bAug10,PLXDC2.cAug10	uc001iqg.1,uc001iqh.1,uc009xkc.1	2.22435	0.136789
4:148402528:+,4:148406764:+	1.85662	-0.821736	4.88527	1.18216e-05	0.000142574	2.79285	EDNRA	core	NM_001166055,NM_001957,NR_045958	ENST00000324300,ENST00000339690,ENST00000358556,ENST00000394047	EDNRA.aAug10,EDNRA.bAug10	uc003iky.2	1.78243	0.0741921
20:35236221:+,20:35236293:+	1.32546	0.793622	4.88478	1.18411e-05	0.000142719	3.14048	C20orf24,TGIF2-C20ORF24	core	NR_026562	ENST00000483815,ENST00000492721	TGIF2andC20orf24.mAug10,TGIF2andC20orf24.pAug10	uc002xft.2	0.526944	0.798519
5:77784976:+,5:77805607:+	1.75484	0.00547361	4.8821	1.19494e-05	0.00014381	2.94667	LHFPL2	core	NM_005779	ENST00000380345,ENST00000515007	LHFPL2.aAug10,LHFPL2.dAug10	uc003kfo.2	1.6418	0.113044
9:130080406:+,9:130082994:+	1.24213	0.418762	4.882	1.19531e-05	0.000143828	3.17627	GARNL3	core	NM_032293	ENST00000314904,ENST00000373386,ENST00000373387,ENST00000373399,ENST00000425970,ENST00000429629,ENST00000435213,ENST00000439286,ENST00000464616,ENST00000478702,ENST00000495172,ENST00000498801	GARNL3.aAug10,GARNL3.bAug10,GARNL3.cAug10,GARNL3.dAug10,GARNL3.eAug10,GARNL3.fAug10,GARNL3.gAug10,GARNL3.hAug10,GARNL3.lAug10,GARNL3.rAug10,GARNL3.tAug10,GARNL3.uAug10	uc011mad.1,uc011mae.1	1.07706	0.165069
20:35927282:+,20:35929611:+	1.14531	1.17402	4.88045	1.20163e-05	0.000144421	3.18483	MANBAL	core	NM_022077	ENST00000373605,ENST00000397152,ENST00000397156	MANBAL.aAug10,MANBAL.bAug10,MANBAL.eAug10,MANBAL.fAug10,MANBAL.hAug10,MANBAL.iAug10	uc002xgu.2,uc002xgw.2	0.878103	0.267209
19:13210548:+,19:13211471:+	1.17497	0.931516	4.88	1.20347e-05	0.000144619	3.17987	LYL1	core	NM_005583	ENST00000264824	LYL1.aAug10,LYL1.bAug10,LYL1.cAug10	uc002mwi.2	1.17442	0.000557449
12:27397265:+,12:27450643:+	1.07653	1.10728	4.87932	1.20625e-05	0.000144859	3.1887	STK38L	core	NM_015000	ENST00000389032,ENST00000434385,ENST00000539863,ENST00000544367,ENST00000545470,ENST00000546286	STK38L.aAug10,STK38L.dAug10,STK38L.eAug10,STK38L.kAug10,STK38L.lAug10,STK38L.nAug10,STK38L.pAug10	uc001rhr.2,uc001rhs.2	0.549253	0.527273
13:35619538:+,13:35622700:+	1.25356	0.941579	4.87809	1.21127e-05	0.000145346	3.1554	NBEA	core	NM_015678	ENST00000310336,ENST00000379939,ENST00000400445,ENST00000402346,ENST00000422518,ENST00000540320	NBEA.aAug10	uc001uvb.2	0.799454	0.454102
X:148583707:+,X:148584842:+	2.66521	-0.523443	4.87624	1.21888e-05	0.000146009	2.06425	IDS	extended	None	ENST00000464251	IDS.cAug10	uc011mxg.1	0.937264	1.72794
11:64700718:+,11:64701169:+	1.57547	0.445769	4.87617	1.21918e-05	0.000146009	2.9745	PPP2R5B	core	NM_006244	ENST00000164133,ENST00000359279,ENST00000527441	PPP2R5B.aAug10	uc001oby.2,uc001obz.2	1.22459	0.350882
10:99502921:+,10:99504486:+	1.71798	0.343791	4.87597	1.22e-05	0.000146061	2.94454	ZFYVE27	core	NM_001002261,NM_001002262,NM_144588	ENST00000356257,ENST00000359980,ENST00000393677,ENST00000423811,ENST00000453958,ENST00000497994	ZFYVE27.bAug10,ZFYVE27.cAug10,ZFYVE27.dAug10,ZFYVE27.eAug10,ZFYVE27.fAug10,ZFYVE27.gAug10,ZFYVE27.hAug10,ZFYVE27.iAug10,ZFYVE27.mAug10,ZFYVE27.nAug10,ZFYVE27.uAug10,ZFYVE27.veAug10,ZFYVE27.vhAug10	uc001kok.1,uc001kol.1,uc001kom.1,uc001kon.2,uc001koo.2,uc001kop.2,uc010qpc.1	1.19552	0.522454
14:106388981:+,14:106390195:+	1.04357	1.738	4.87127	1.23957e-05	0.000148033	3.16278	KIAA0125	core	NR_026800	ENST00000482999	KIAA0125.cAug10	uc001yst.2	0.82806	0.215514
2:167134823:+,2:167136867:+	1.92177	-0.203146	4.87026	1.24382e-05	0.000148453	2.67772	SCN9A	core	NM_002977	ENST00000303354,ENST00000375387,ENST00000409435,ENST00000409672	SCN9A.aAug10	uc010fpl.2	1.86614	0.0556279
10:61962858:+,10:61965550:+	1.60912	-0.184543	4.86993	1.24524e-05	0.000148605	2.9573	ANK3	core	NM_001204403,NM_001204404,NM_020987	ENST00000280772,ENST00000373827,ENST00000395293,ENST00000395299,ENST00000395302,ENST00000395304,ENST00000503366,ENST00000510495	ANK3.aAug10,ANK3.bAug10,ANK3.cAug10,ANK3.dAug10,ANK3.hAug10	uc001jky.2,uc001jkz.3,uc001jlb.1,uc001jlc.1,uc010qih.1	1.6071	0.00202045
4:156711063:+,4:156715008:+	1.00562	1.30574	4.86525	1.26511e-05	0.000150546	3.1443	GUCY1B3	core	NM_000857	ENST00000264424,ENST00000502959,ENST00000503520,ENST00000505154,ENST00000505764,ENST00000507146,ENST00000513437	GUCY1B3.aAug10,GUCY1B3.bAug10,GUCY1B3.cAug10,GUCY1B3.dAug10,GUCY1B3.eAug10,GUCY1B3.fAug10,GUCY1B3.gAug10,GUCY1B3.hAug10	uc003ipc.2,uc003ipd.2,uc010iqf.2,uc010iqg.2,uc011cio.1,uc011cip.1,uc011ciq.1	0.950385	0.0552335
X:100646223:+,X:100646447:+	2.31952	-0.476817	4.86349	1.27269e-05	0.000151221	2.38713	RPL36A	extended	None	ENST00000471855	RPL36AandHNRNPH2.tAug10	None	-0.115455	2.43497
2:73450234:+,2:73450554:+	1.34795	0.463878	4.85974	1.28895e-05	0.000152802	3.06102	SMYD5	core	NM_006062	ENST00000389501	SMYD5.aAug10,SMYD5.bAug10,SMYD5.cAug10,SMYD5.dAug10	uc002siw.2,uc002six.1,uc010yre.1	0.897592	0.450354
10:62038630:+,10:62038808:+	1.48601	-0.075424	4.85815	1.29591e-05	0.000153501	2.97884	ANK3	core	NM_001204403,NM_001204404,NM_020987	ENST00000280772,ENST00000373827,ENST00000395293,ENST00000395299,ENST00000395304,ENST00000503366,ENST00000503925,ENST00000510495	ANK3.aAug10,ANK3.bAug10,ANK3.cAug10,ANK3.hAug10,ANK3.uAug10,ANK3.vaAug10	uc001jky.2,uc001jkz.3,uc001jlb.1,uc010qih.1	1.6071	-0.121093
9:2639981:+,9:2641377:+	1.00354	1.25791	4.85797	1.29669e-05	0.00015354	3.12129	VLDLR	core	NM_001018056,NM_003383	ENST00000382099,ENST00000382100	FLJ35024.fAug10,VLDLR.aAug10,VLDLR.bAug10	uc003zhk.1,uc003zhl.1,uc003zhm.1	0.867001	0.13654
6:25691352:+,6:25701435:+	2.88335	-1.66751	4.85593	1.30569e-05	0.000154403	1.7156	SCGN	core	NM_006998	ENST00000334979,ENST00000377961	SCGN.aAug10,SCGN.cAug10	uc003nfb.2,uc010jpz.2	2.289	0.594345
19:44099492:+,19:44100134:+	1.4225	0.679849	4.8556	1.30712e-05	0.000154518	3.02367	IRGQ	core	NM_001007561	ENST00000422989	IRGQandXRCC1.aAug10	uc010eiv.2	1.32085	0.101653
6:166918100:+,6:166921691:+	1.13245	1.24076	4.85525	1.30865e-05	0.000154619	3.10617	RPS6KA2	core	NM_001006932,NM_021135	ENST00000265678,ENST00000366863,ENST00000366865,ENST00000405189,ENST00000481261,ENST00000503859,ENST00000507350,ENST00000507371,ENST00000510118,ENST00000512860	RNASET2andRPS6KA2.aAug10,RNASET2andRPS6KA2.bAug10,RNASET2andRPS6KA2.cAug10,RNASET2andRPS6KA2.dAug10,RNASET2andRPS6KA2.eAug10,RNASET2andRPS6KA2.jAug10	uc003qvb.1,uc003qvc.1,uc003qvd.1,uc010kkl.1,uc011ego.1	1.39312	-0.260668
1:198201767:+,1:198222170:+	1.05301	1.21704	4.85251	1.32087e-05	0.000155849	3.10151	NEK7	core	NM_133494	ENST00000367383,ENST00000367385,ENST00000391974,ENST00000442588,ENST00000538004,ENST00000544035	NEK7.aAug10,NEK7.bAug10,NEK7.dAug10,NEK7.eAug10,NEK7.fAug10,NEK7.jAug10	uc001gun.3	0.684989	0.368022
8:17843596:+,8:17846461:+	1.97088	-0.580369	4.85231	1.32174e-05	0.000155915	2.61657	PCM1	extended	None	None	PCM1.sAug10	None	0.0529858	1.91789
14:20929004:+,14:20929343:+	1.0822	1.17413	4.85129	1.32634e-05	0.000156366	3.10082	TMEM55B	core	NM_144568	ENST00000250489	TMEM55B.bAug10	uc001vxl.2	0.307154	0.775043
16:15528616:+,16:15609162:+	1.4612	0.462319	4.84684	1.34644e-05	0.00015822	2.98128	C16orf45	core	NM_033201	ENST00000300006	C16orf45.aAug10,C16orf45.bAug10,C16orf45.cAug10,C16orf45.fAug10,C16orf45.hAug10	uc002ddo.2	1.03142	0.429778
2:218759779:+,2:218762521:+	1.3676	0.833581	4.84638	1.34855e-05	0.000158407	3.00396	TNS1	core	NM_022648	ENST00000171887,ENST00000310858,ENST00000413280,ENST00000413554,ENST00000419504,ENST00000430930,ENST00000439083,ENST00000446903,ENST00000492338	TNS1.aAug10,TNS1.bAug10,TNS1.cAug10,TNS1.dAug10,TNS1.eAug10,TNS1.gAug10,TNS1.hAug10	uc002vgr.2,uc002vgs.2,uc002vgt.2,uc002vgu.3,uc010fvj.1,uc010fvk.1,uc010zjv.1	0.912965	0.45464
12:83360776:+,12:83379704:+	1.61868	0.356268	4.84326	1.36285e-05	0.00015988	2.8836	TMTC2	core	NM_152588	ENST00000321196,ENST00000546590,ENST00000549919,ENST00000551915	TMTC2.aAug10,TMTC2.bAug10,TMTC2.cAug10,TMTC2.eAug10	uc001szs.1,uc001szt.2,uc010suk.1	1.54216	0.0765193
12:104851292:+,12:104995684:+	1.16193	1.43873	4.84231	1.36725e-05	0.000160283	3.06548	CHST11	core	NM_001173982	ENST00000546689,ENST00000549260	CHST11.bAug10,CHST11.cAug10	uc001tky.2	1.22326	-0.0613261
[truncated: 3,285 more rows]

## Sheet: BE2C_siRNA2
junc	Junc.logFC	AveExpr	t	P.Value	adj.P.Val	B	Gene	Annotation_Set	RefGene	EnsGene	AceView	UCSC	Gene.log2FC	diff.log2FC	shared
[truncated: 11,862 more rows]

## Sheet: SKNAS_siRNA1
junc	logFC	AveExpr	t	P.Value	adj.P.Val	B	Gene	Annotation_Set	RefGene	EnsGene	AceView	UCSC	Gene.log2FC	diff.log2FC
[truncated: 8,117 more rows]

[truncated: 4 more sheets: SKNAS_siRNA2, SKNAS common, BE2C common, Common genes in both]
