# Supplementary figures and images for: Metabolic reprogramming of cancer cells by JMJD6-mediated pre-mRNA splicing associated with therapeutic response to splicing inhibitor
Source: eLife journal article supplement (doi:10.7554/elife.90993), 2023-11-01

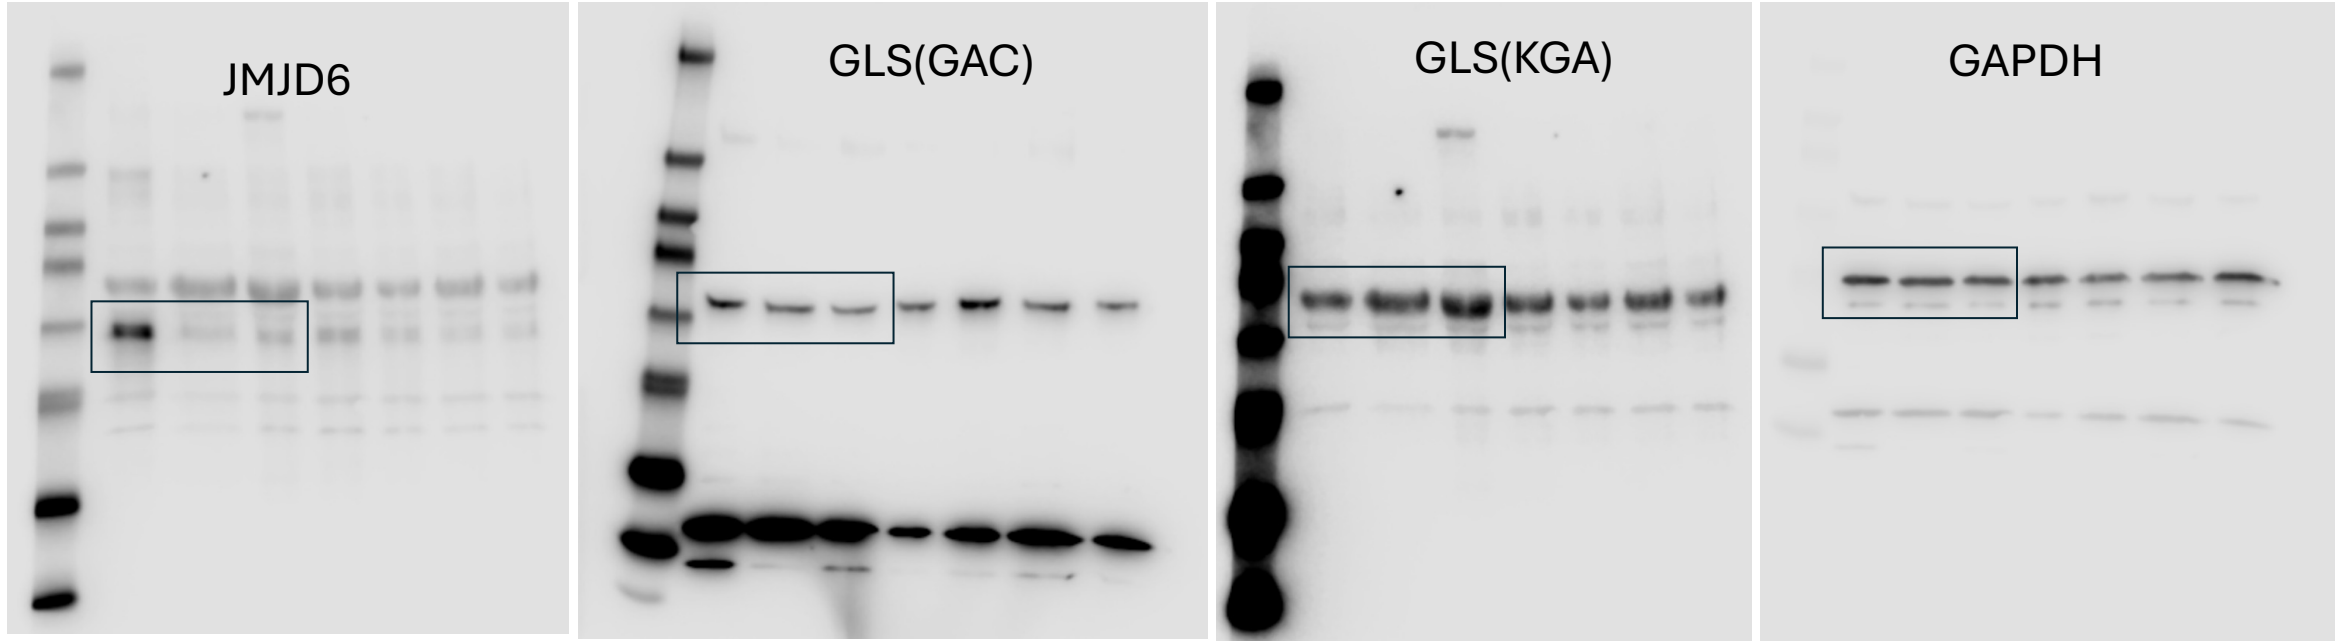

Figure 4C

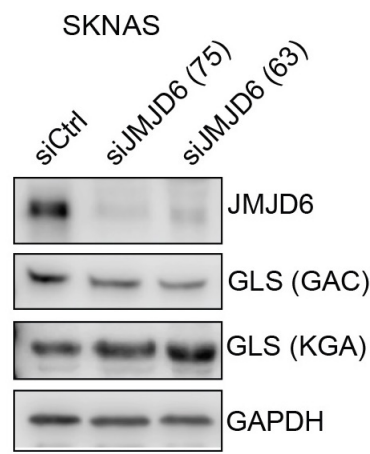

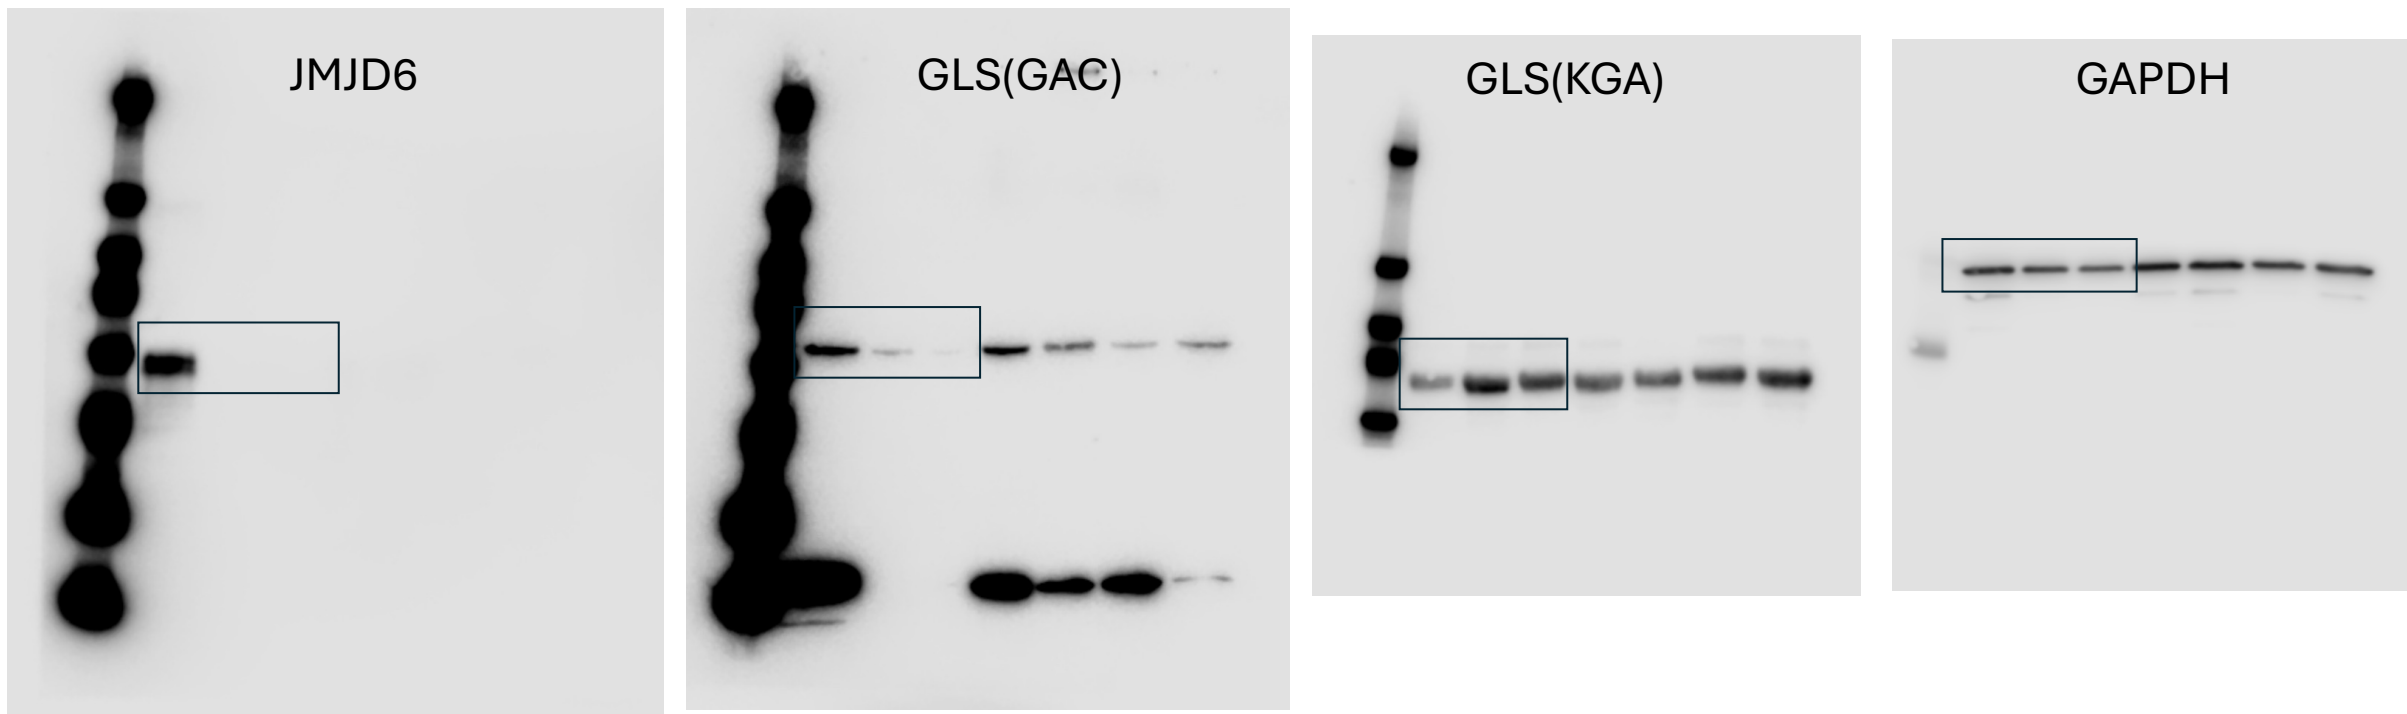

Figure 4C

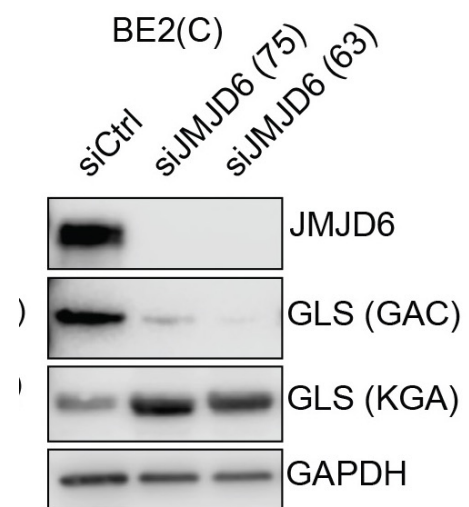

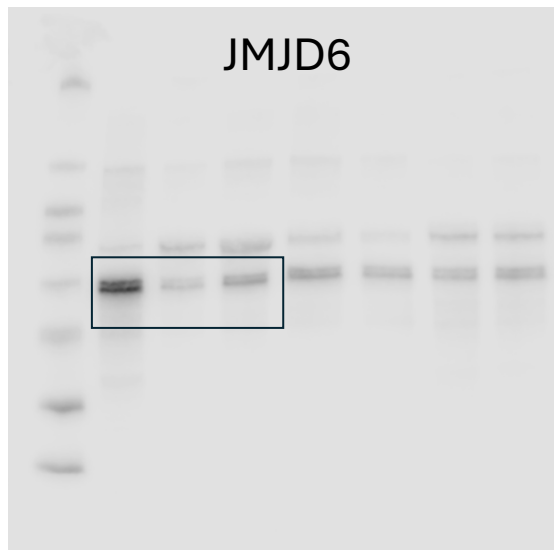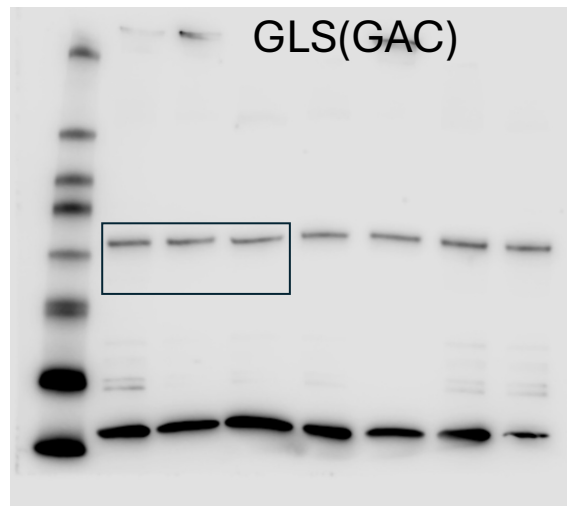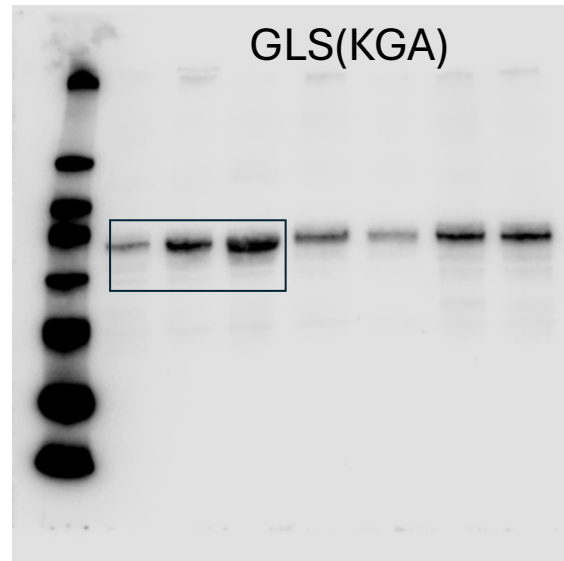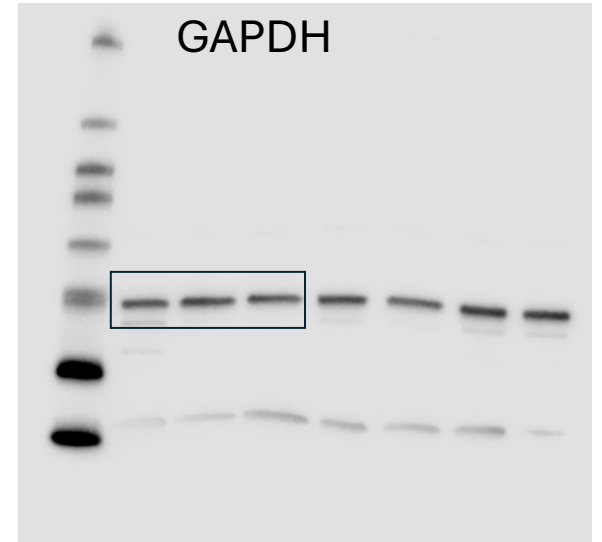

Figure 4C

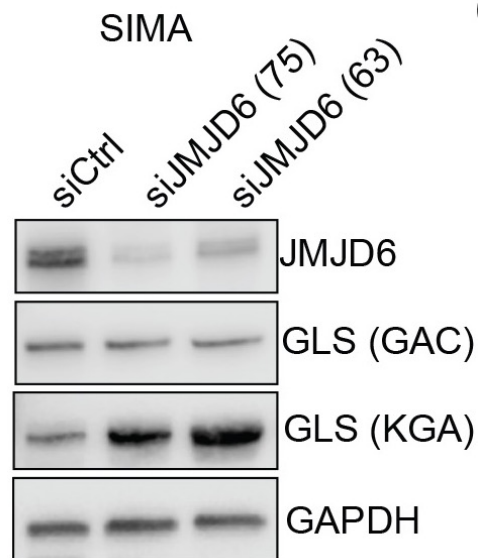

Figure 4E

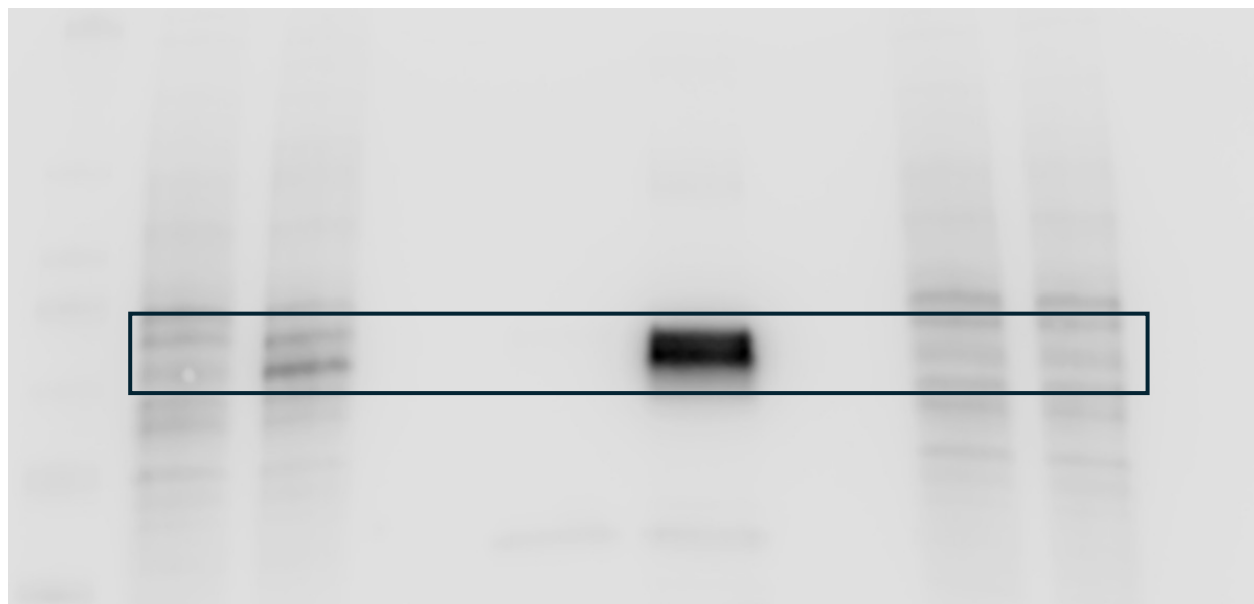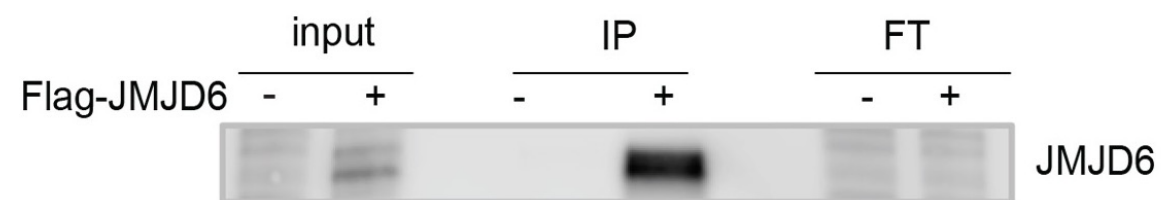

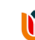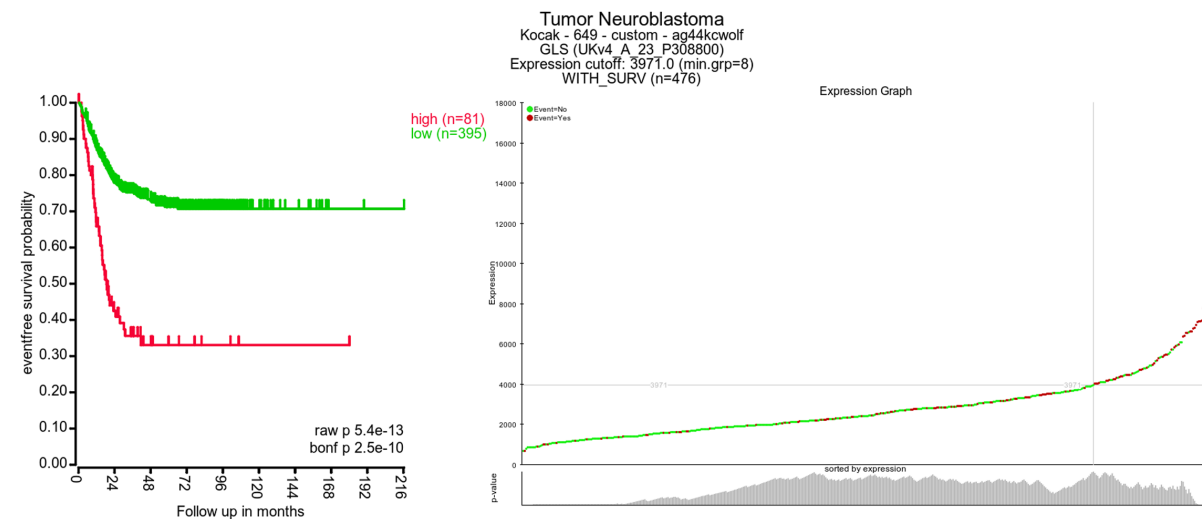

Figure 4F

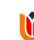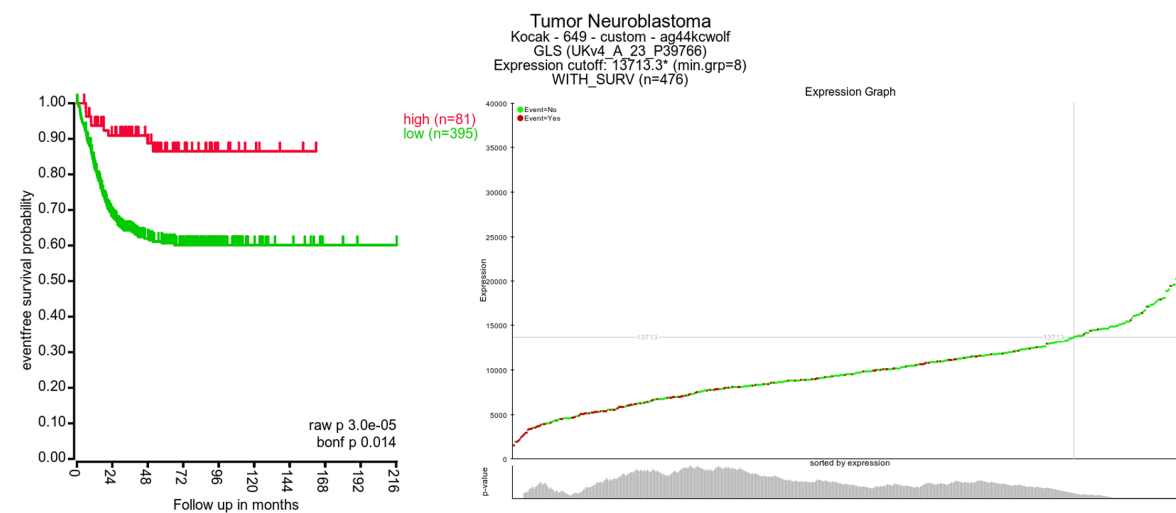

Supplement: data1 [file elife-90993-data1-v1.zip]

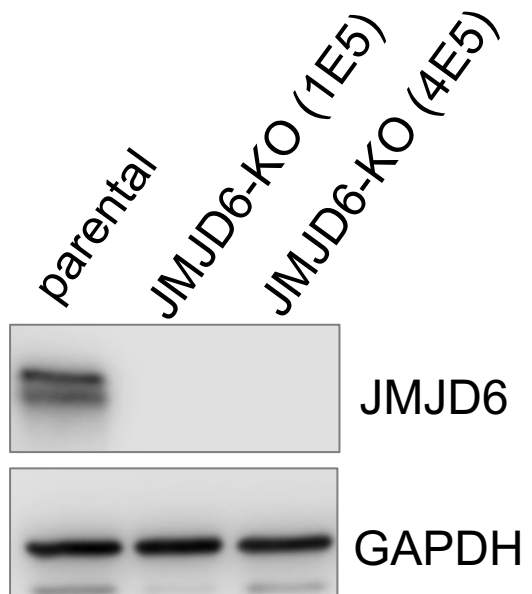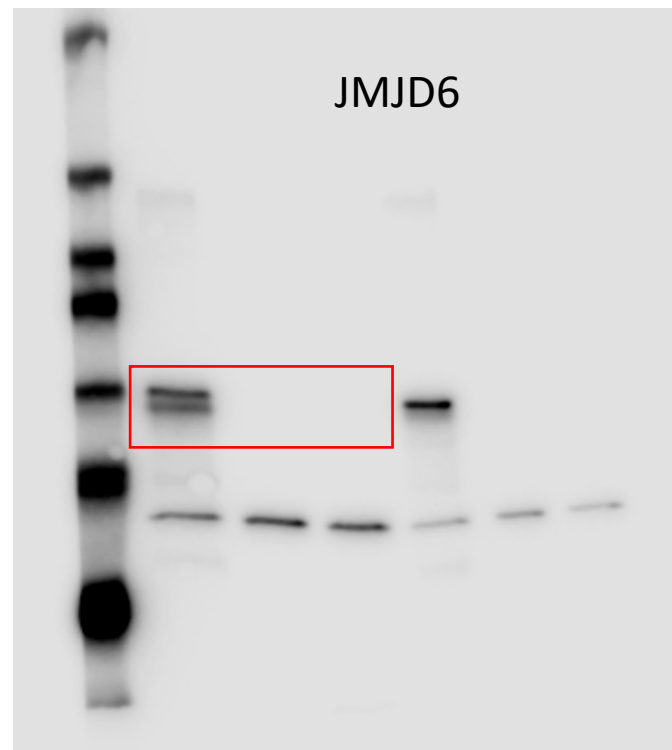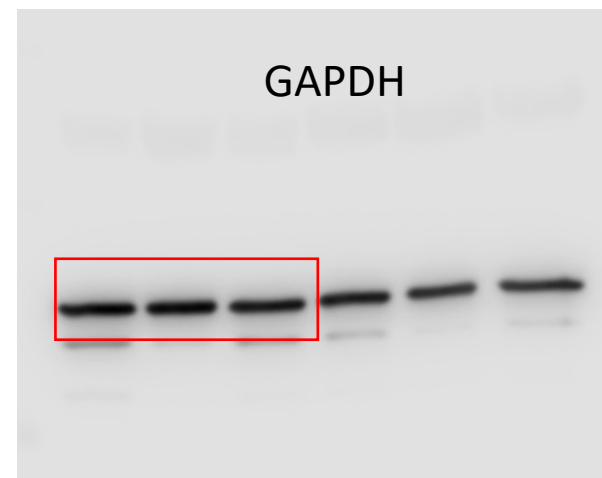

Supplement: data1 [file elife-90993-data1-v1.zip]

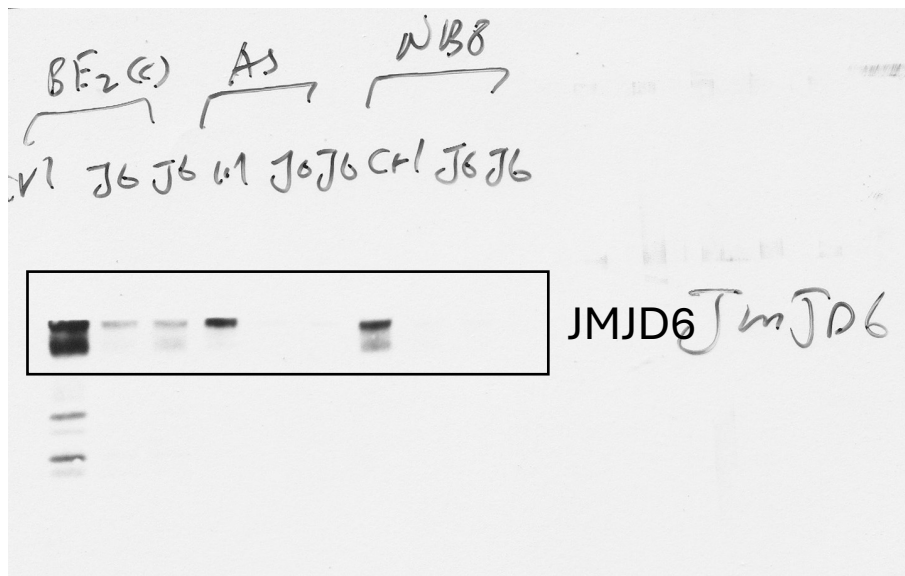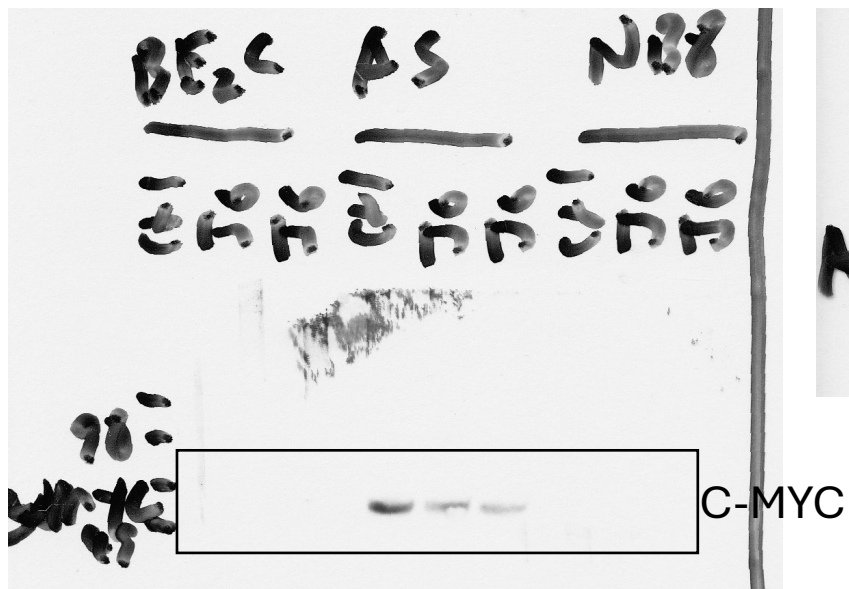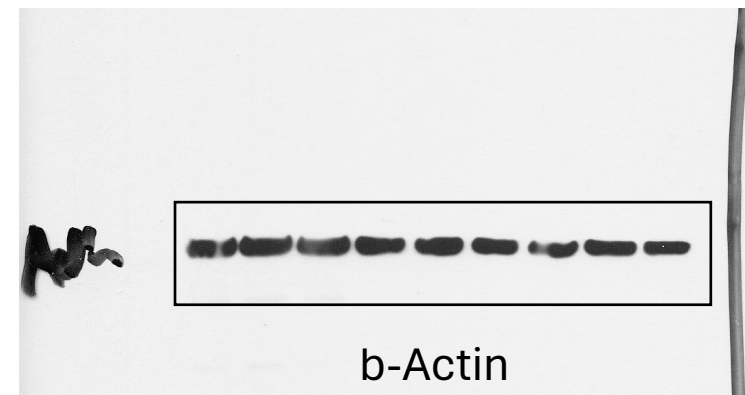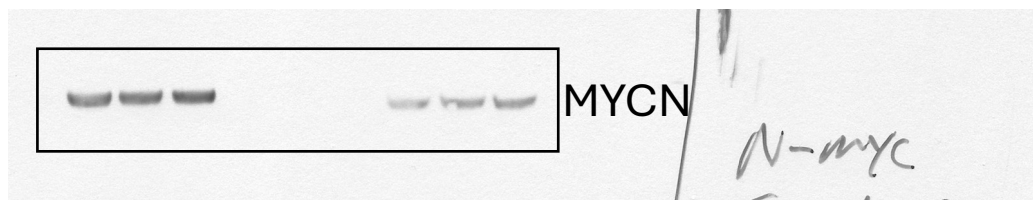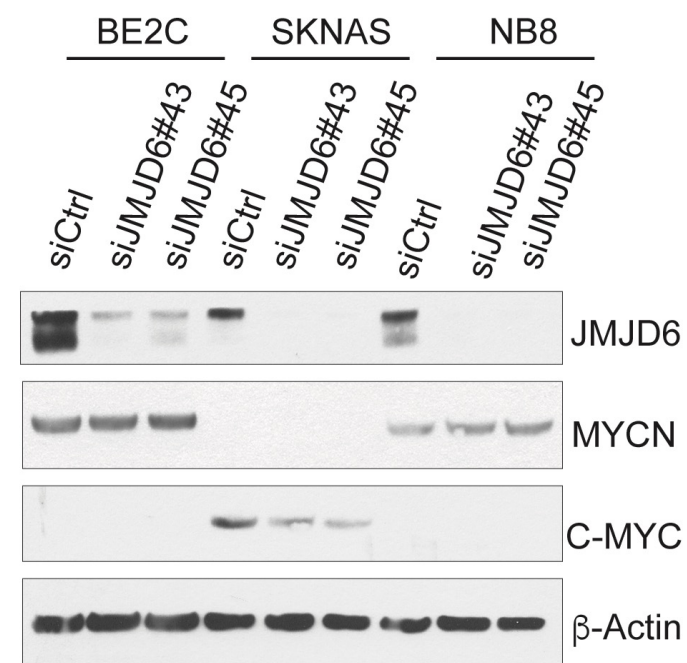

Supplement: data1 [file elife-90993-data1-v1.zip]

Figure 2—Supplement 2A, B

A


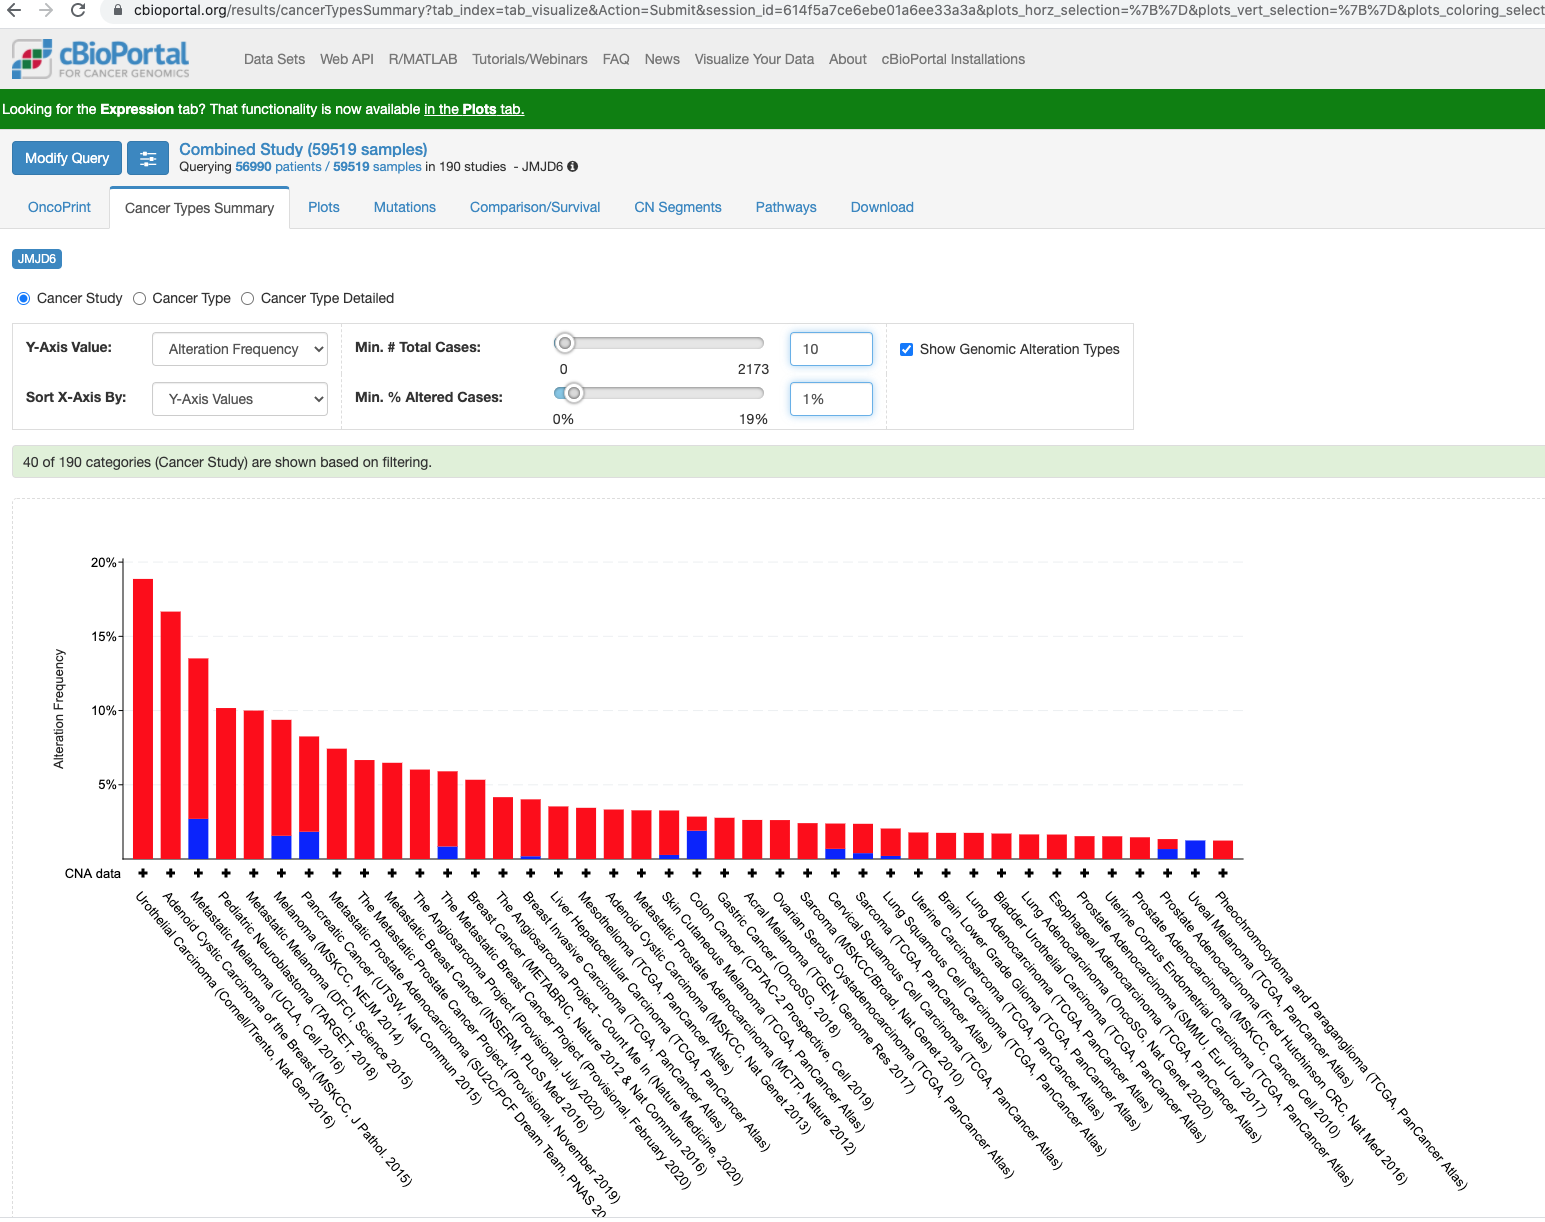


B


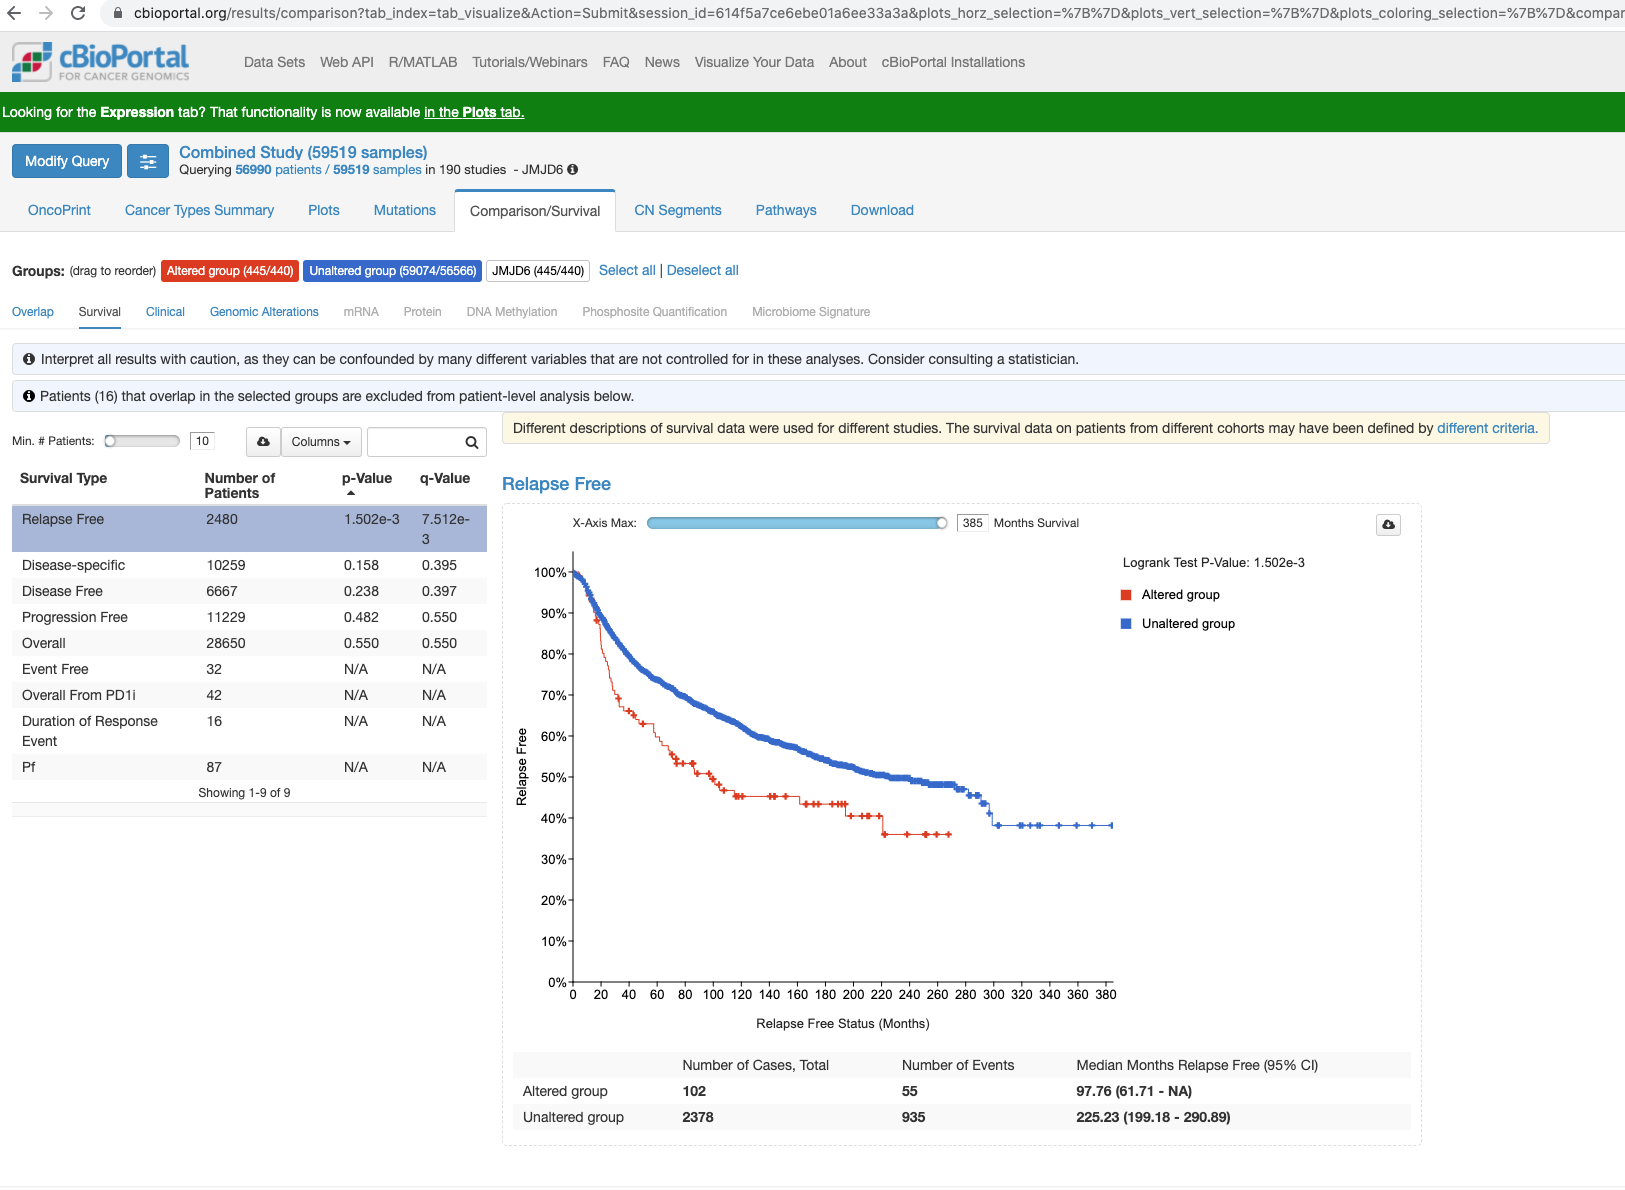

Supplement: data1 [file Figure 2-Supplement 2-data source.docx]

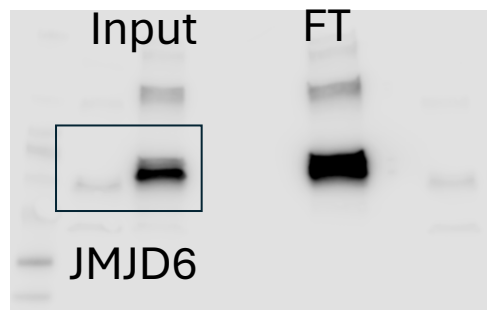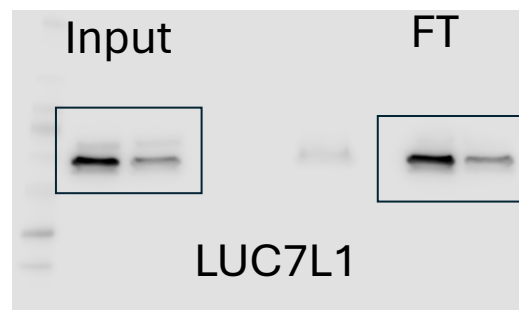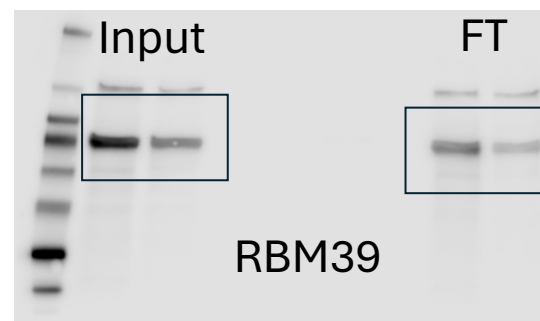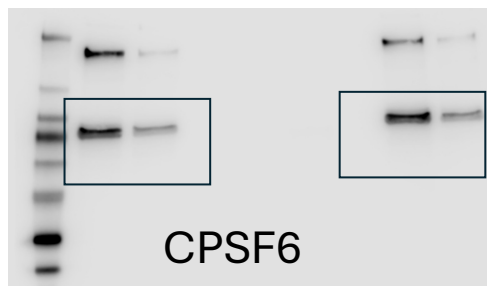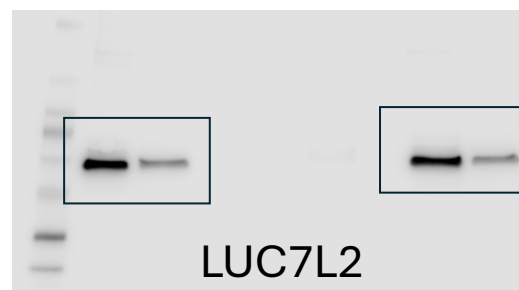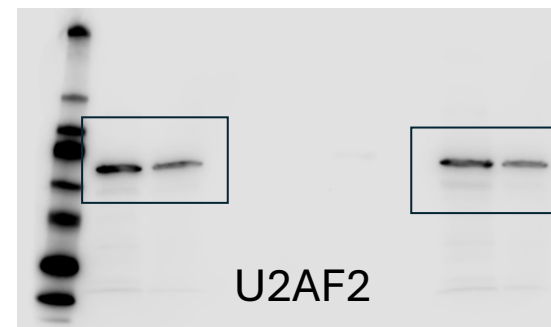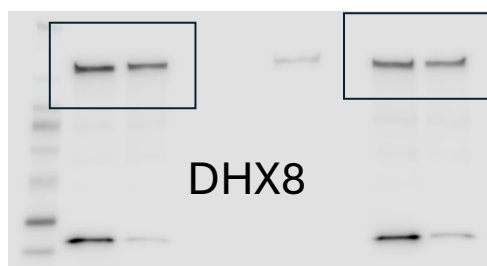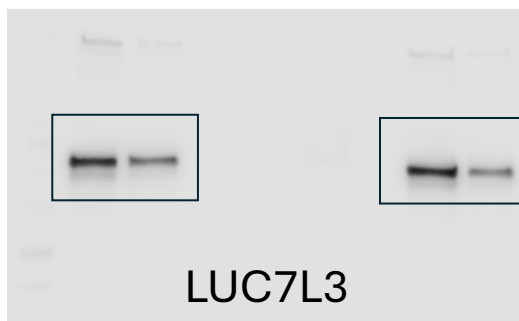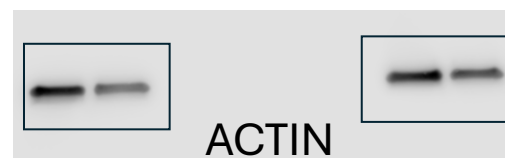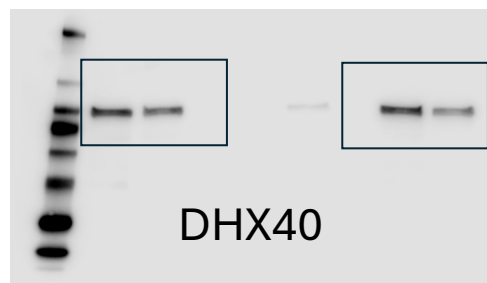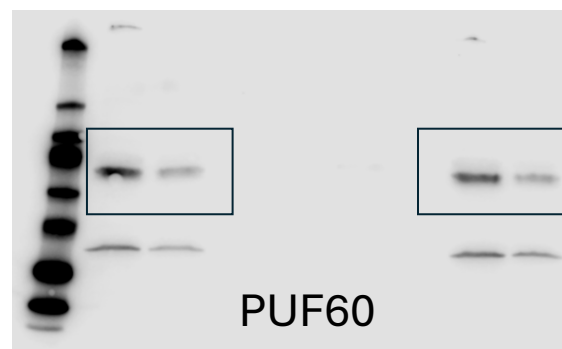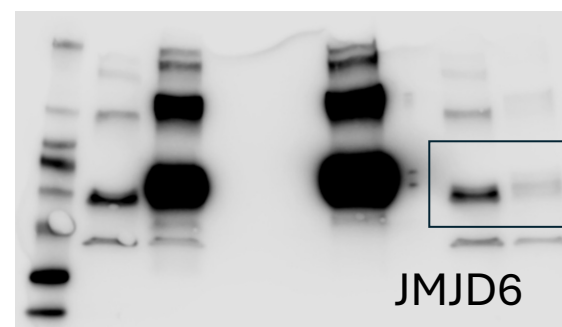

Figure 6B

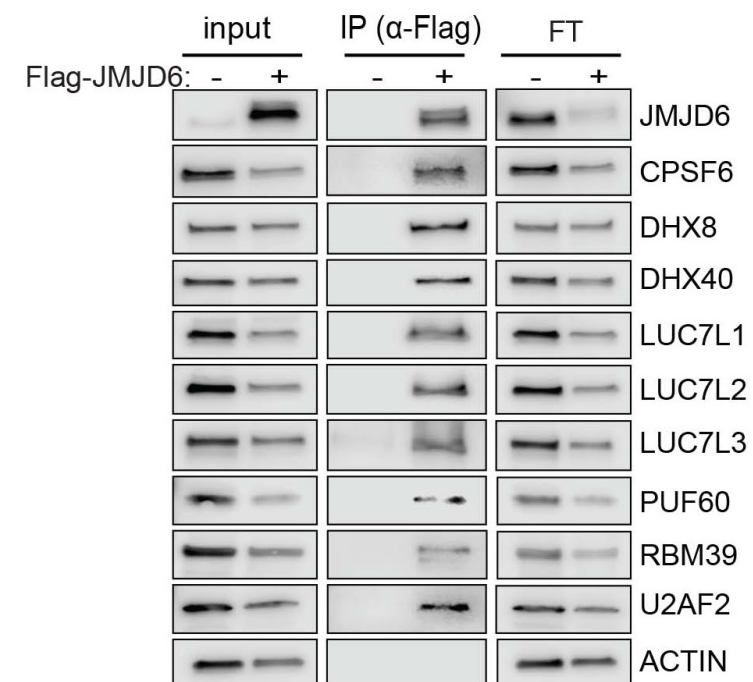

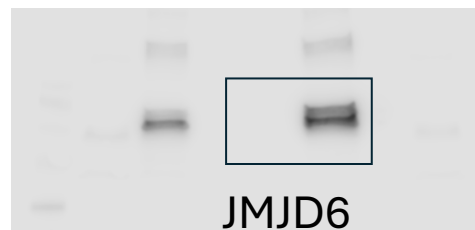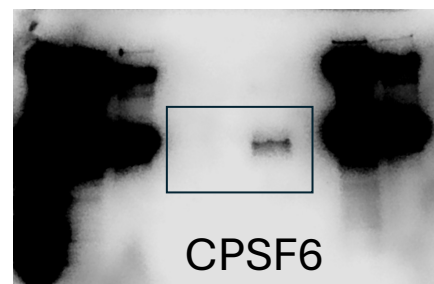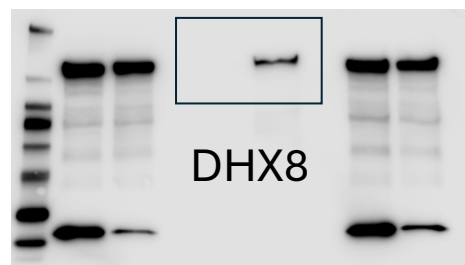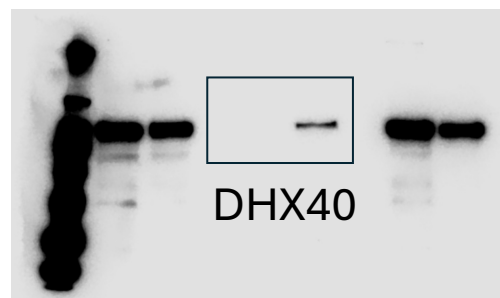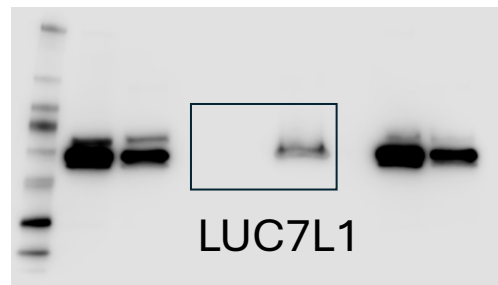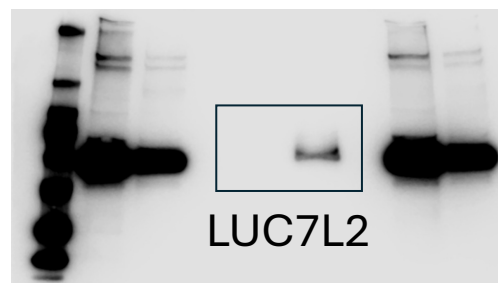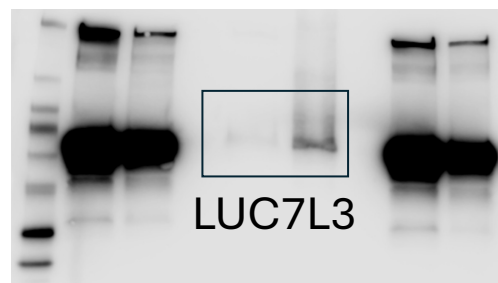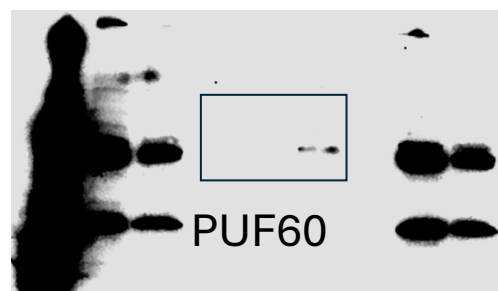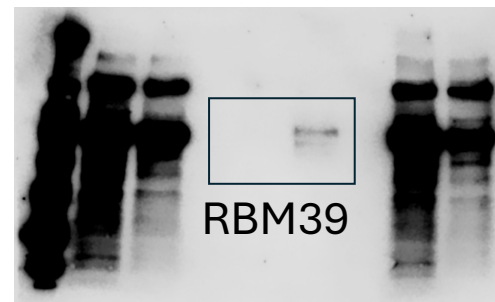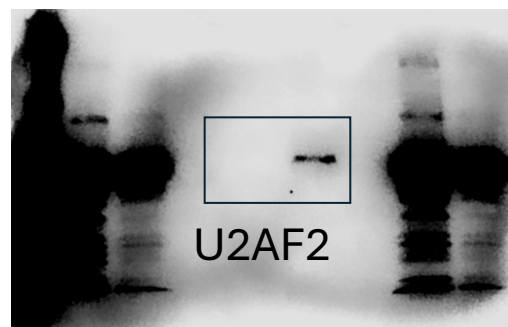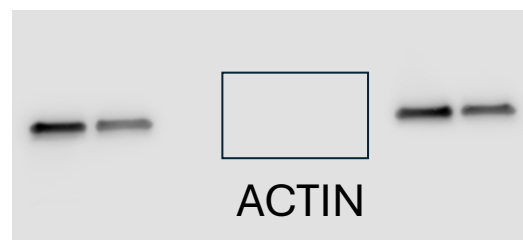

Figure 6B

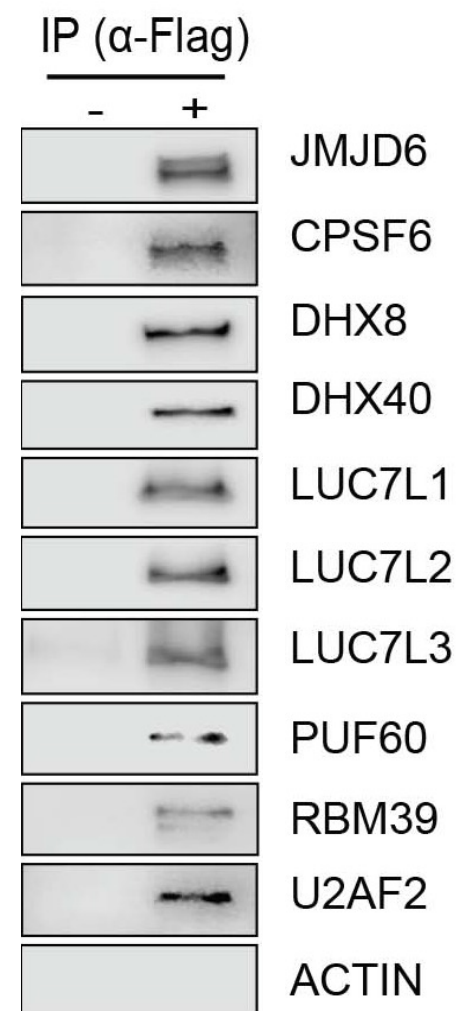

Figure 6C

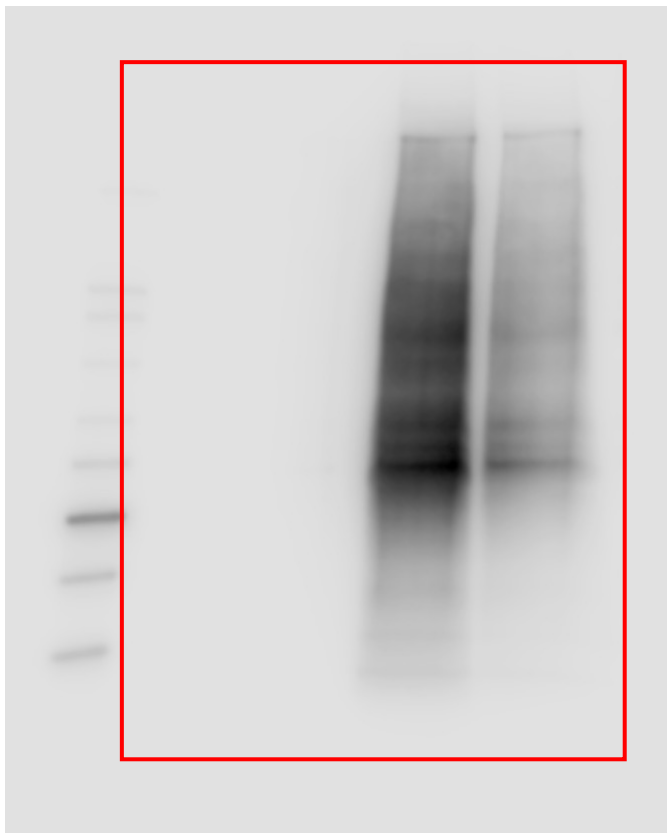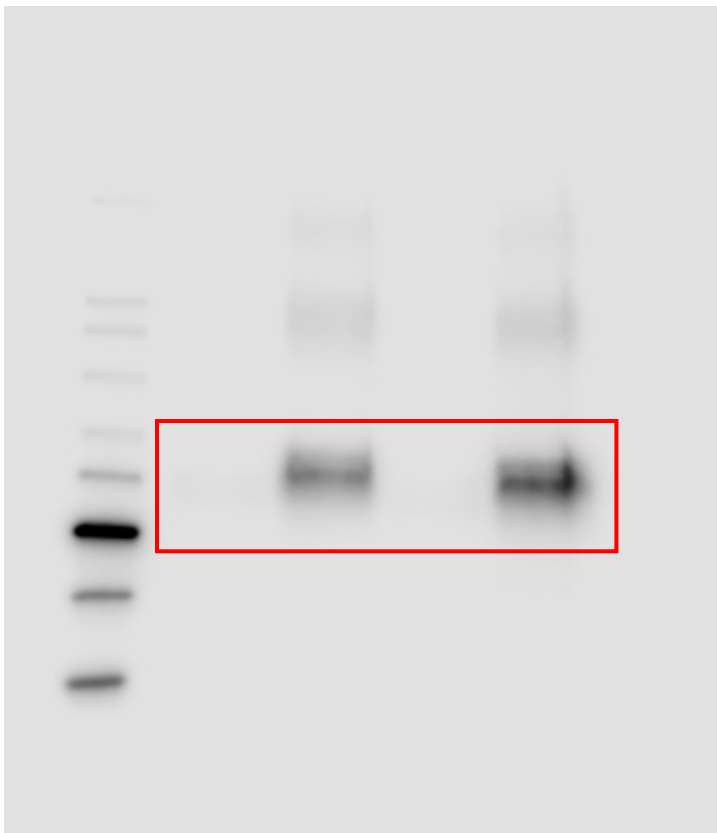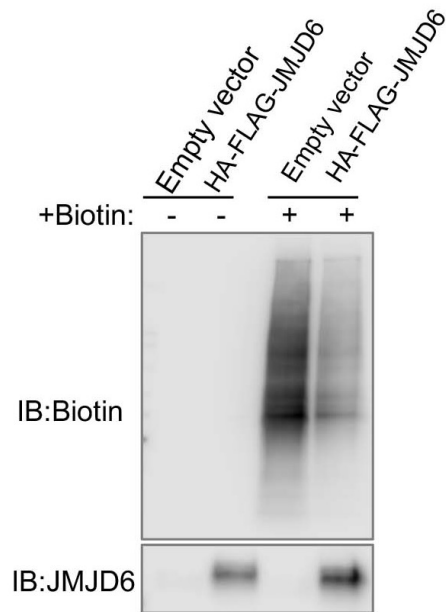

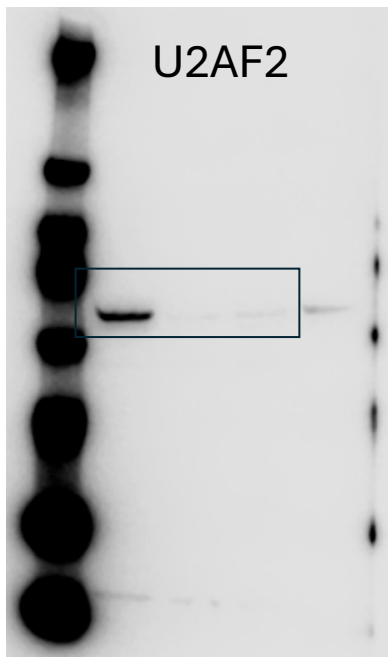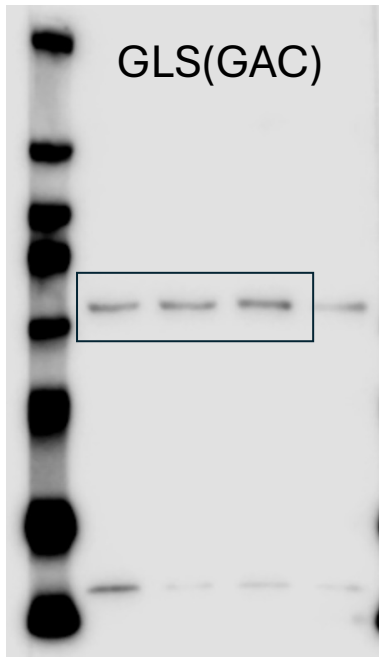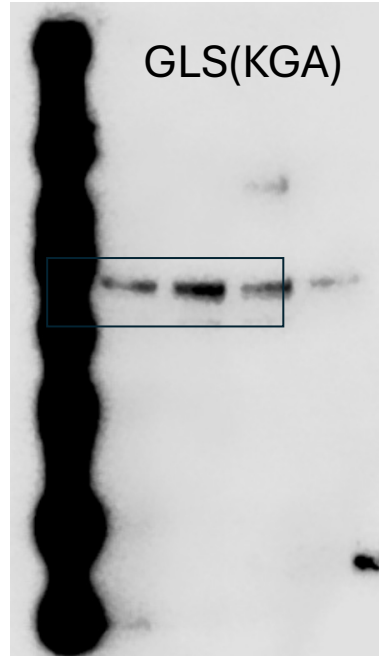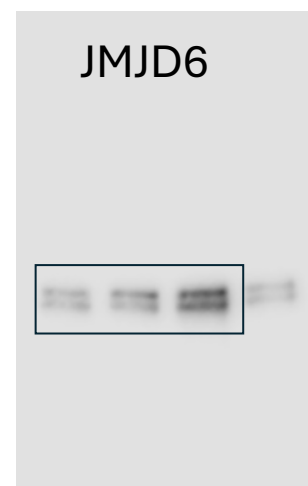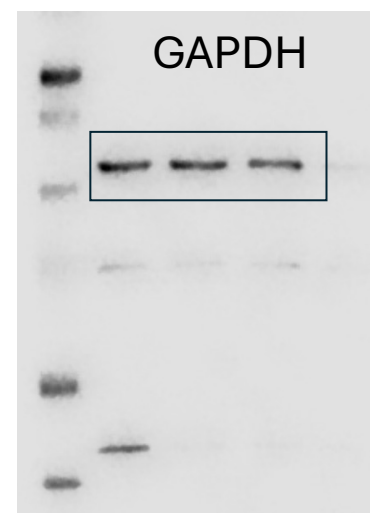

Figure 6D

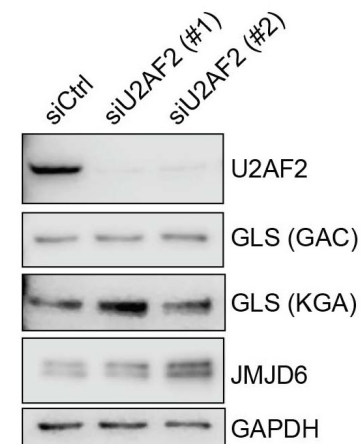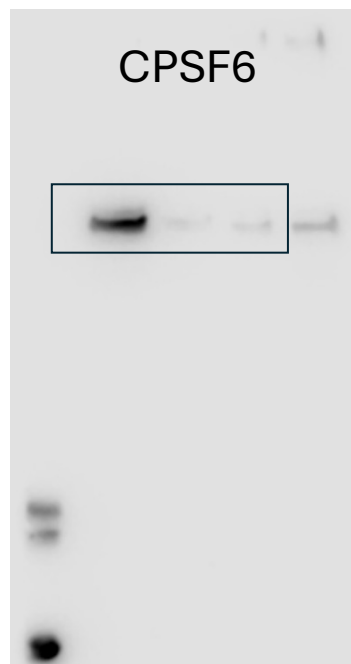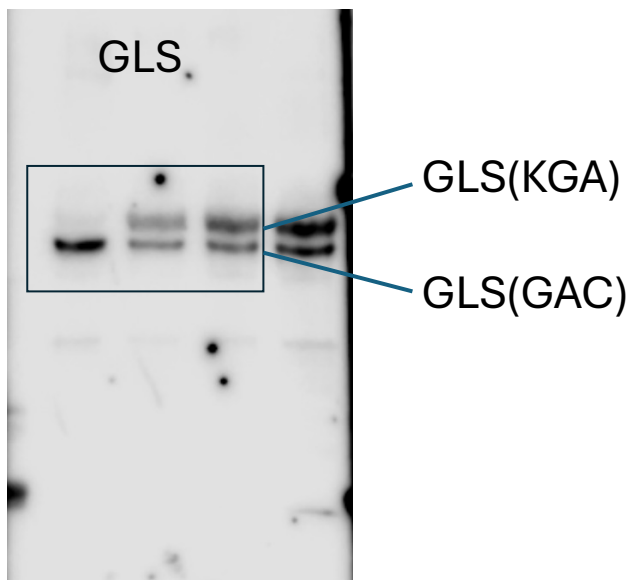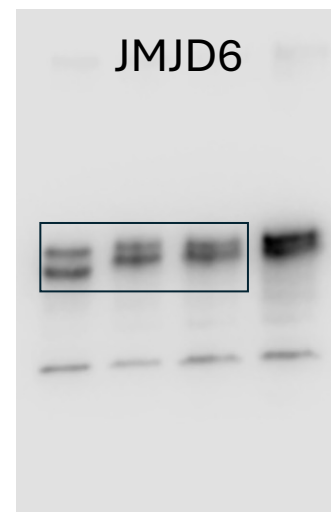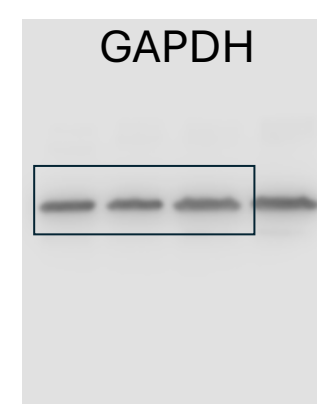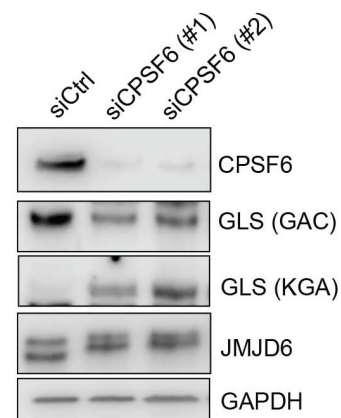

Figure 6E

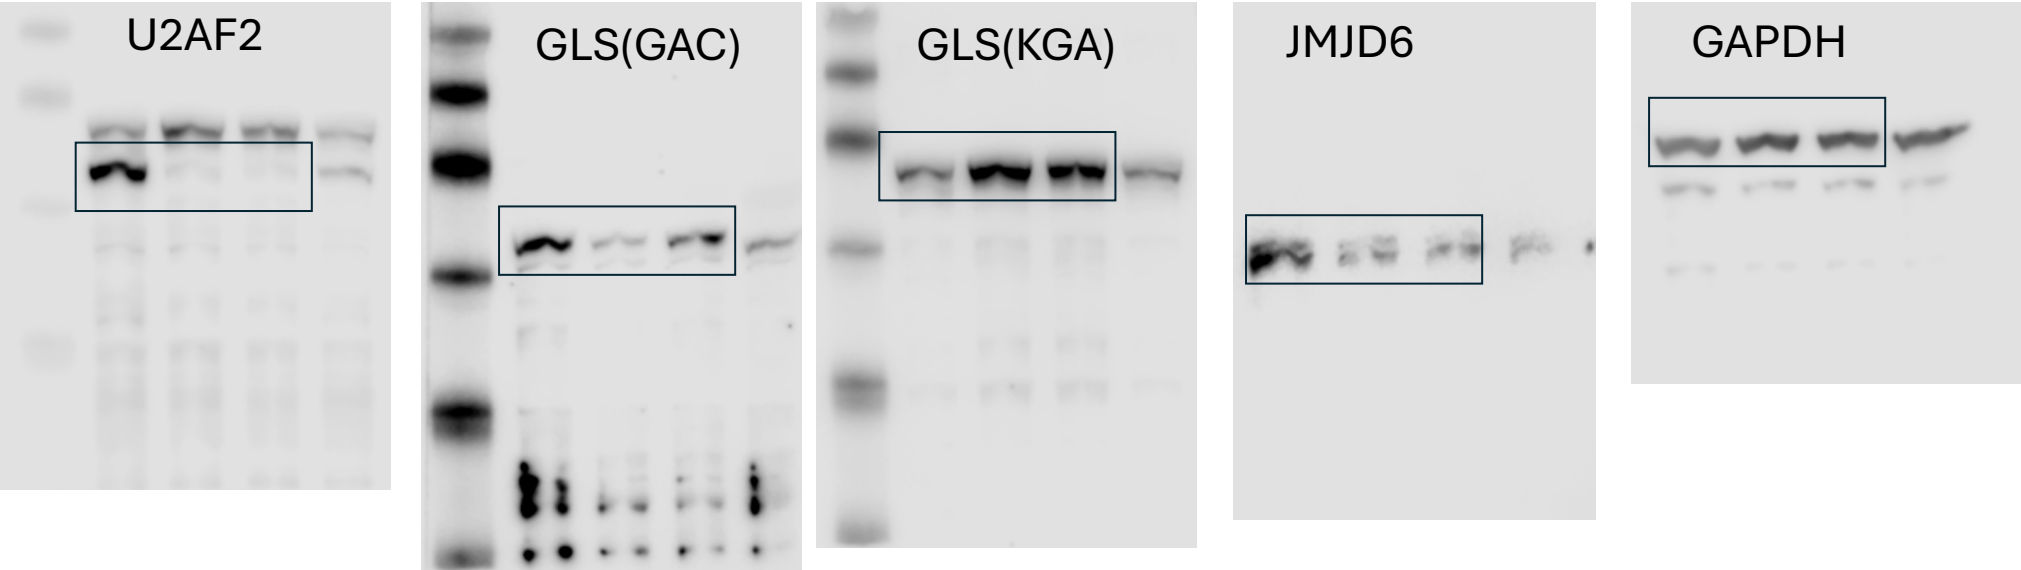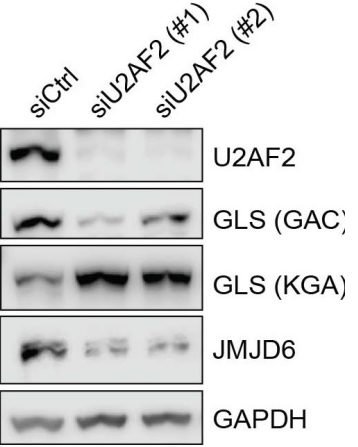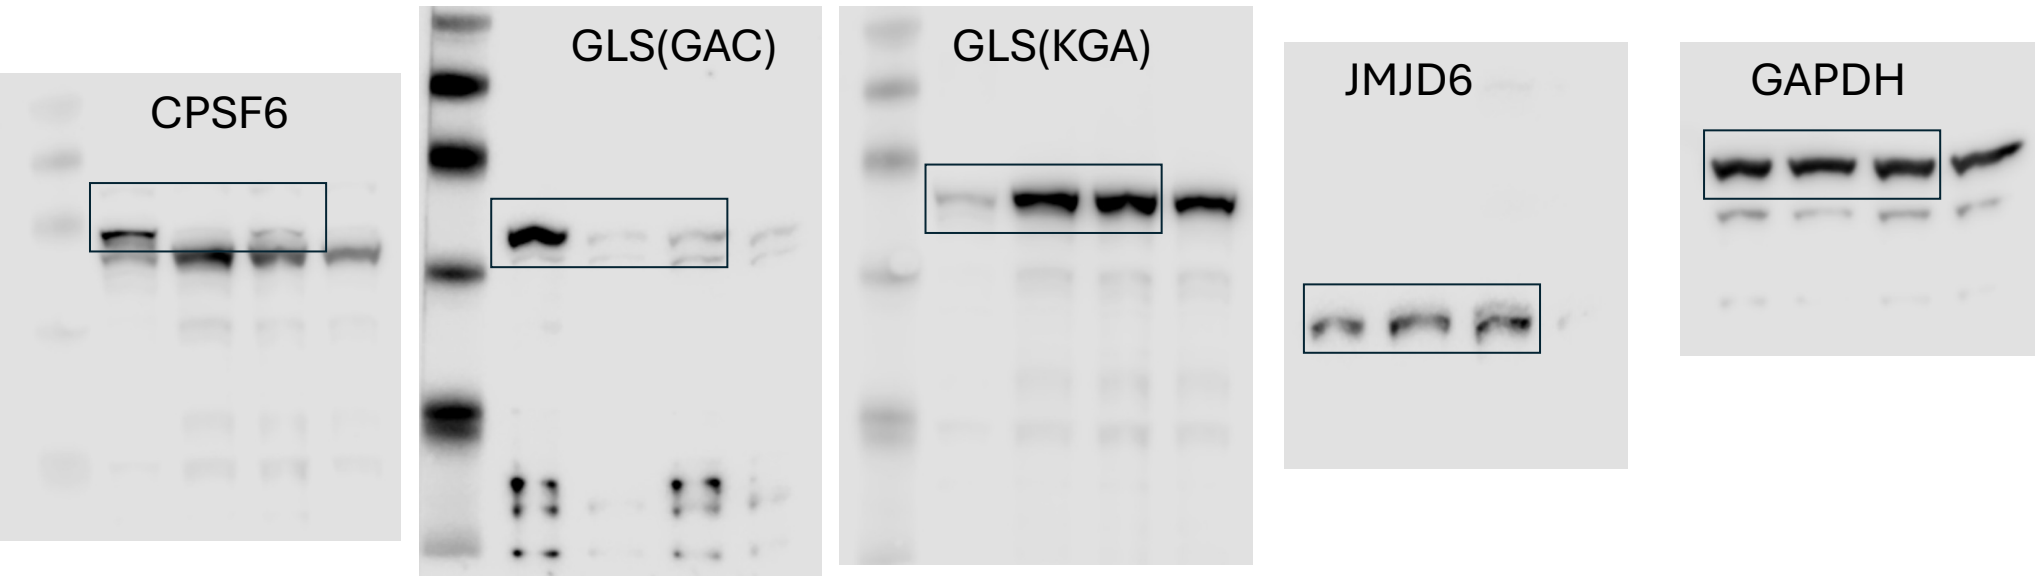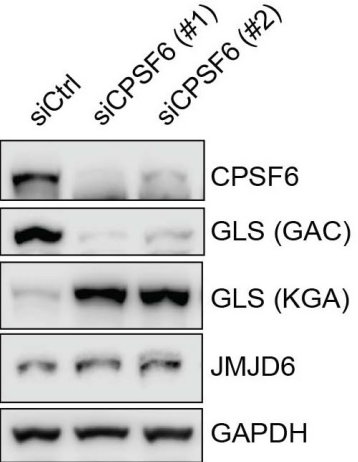

Supplement: data1 [file elife-90993-data1-v1.zip]

Figure 8B

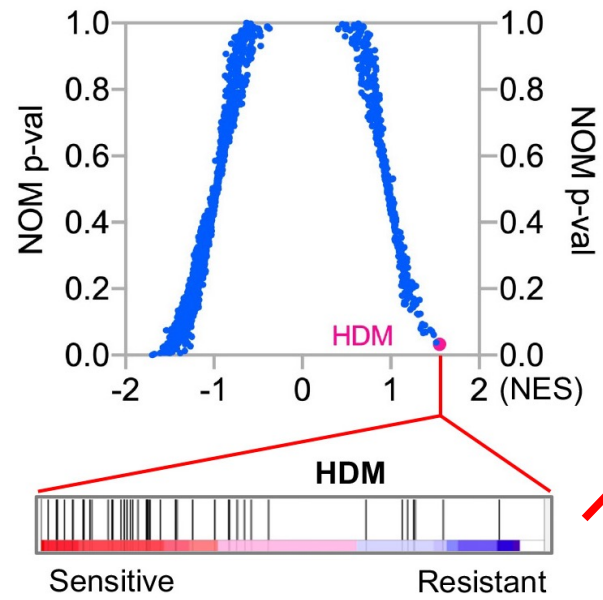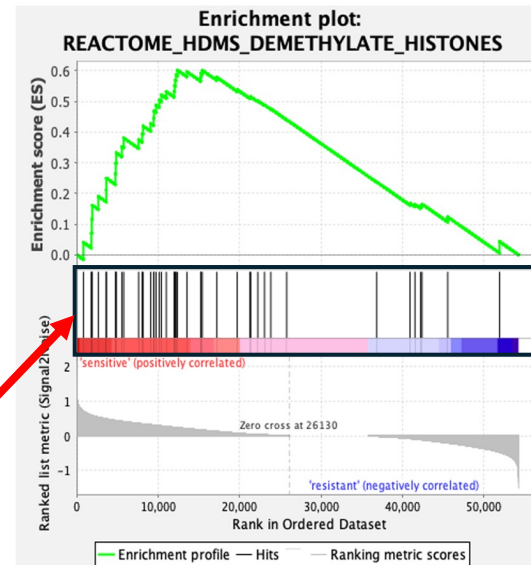

Figure 8C

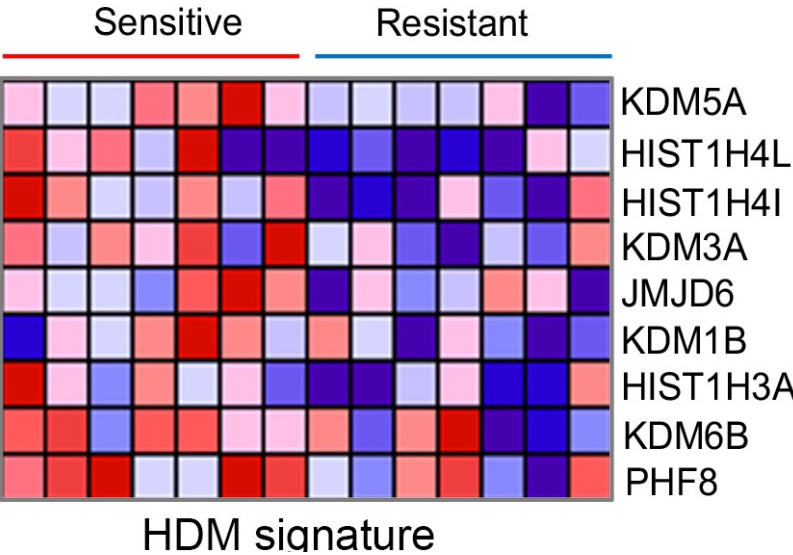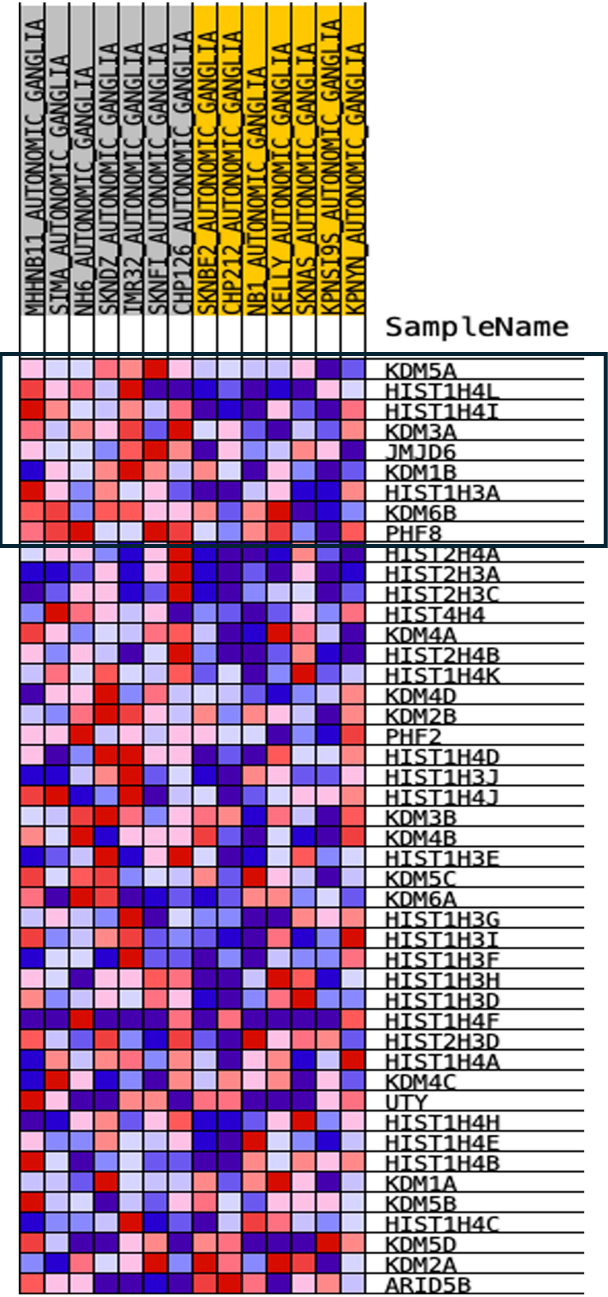

Figure 8E

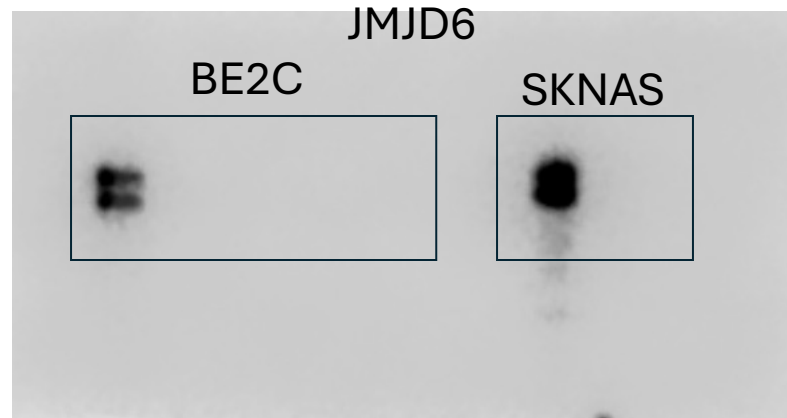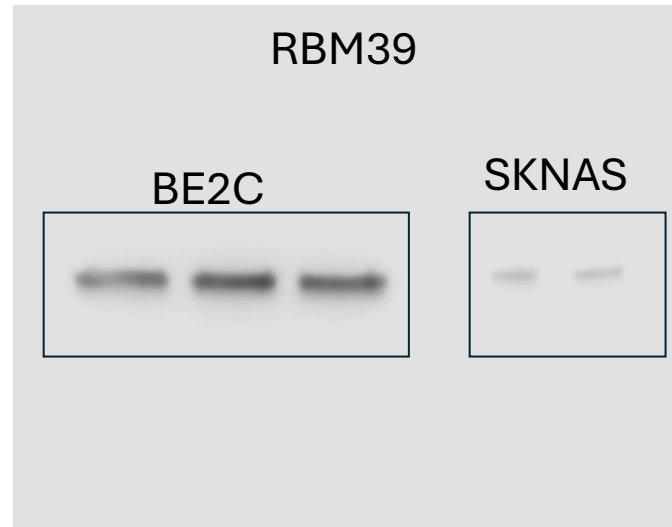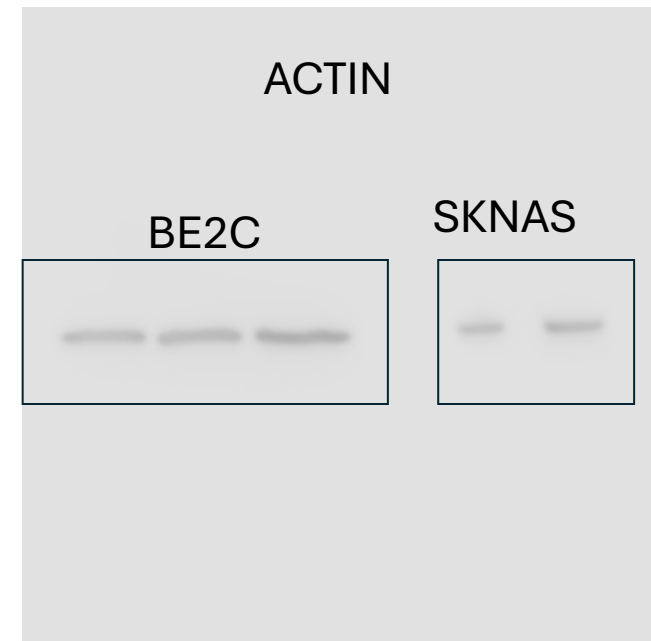

Figure 8E

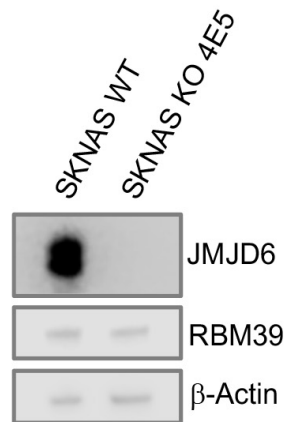

Figure 8H

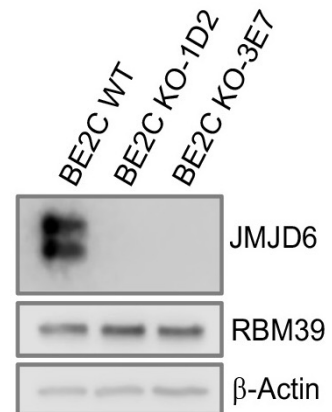

Figure 8F

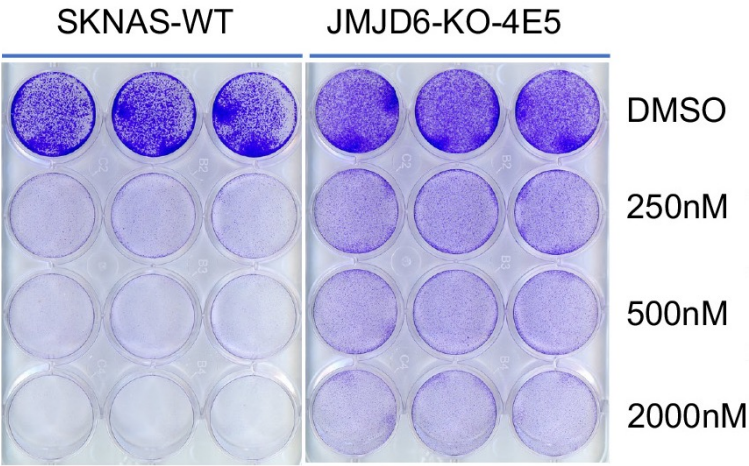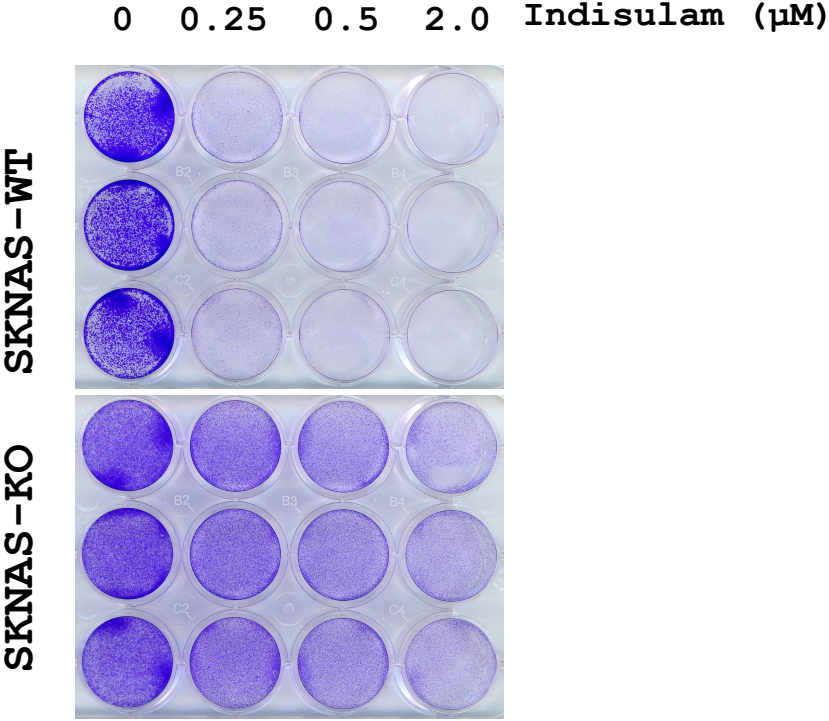

Figure 8l

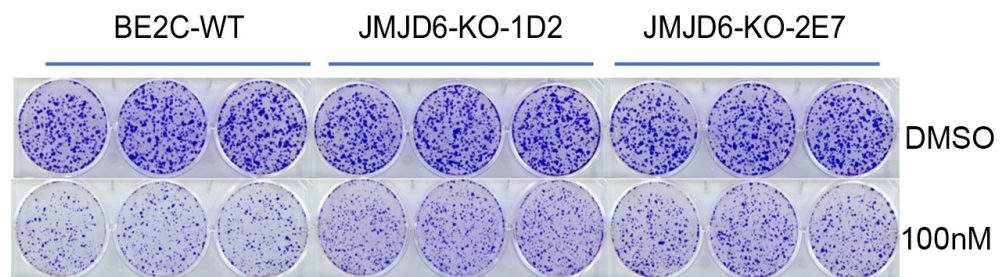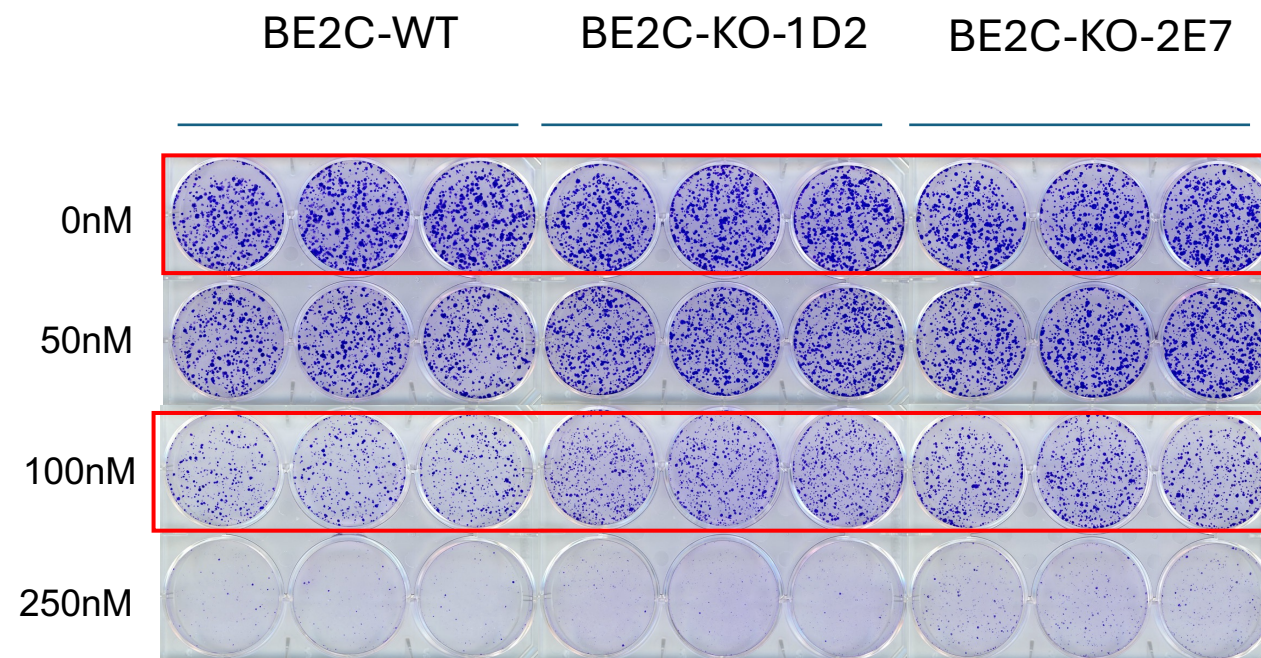



Figure 8K

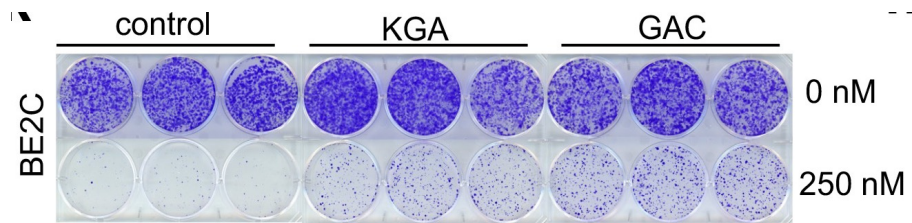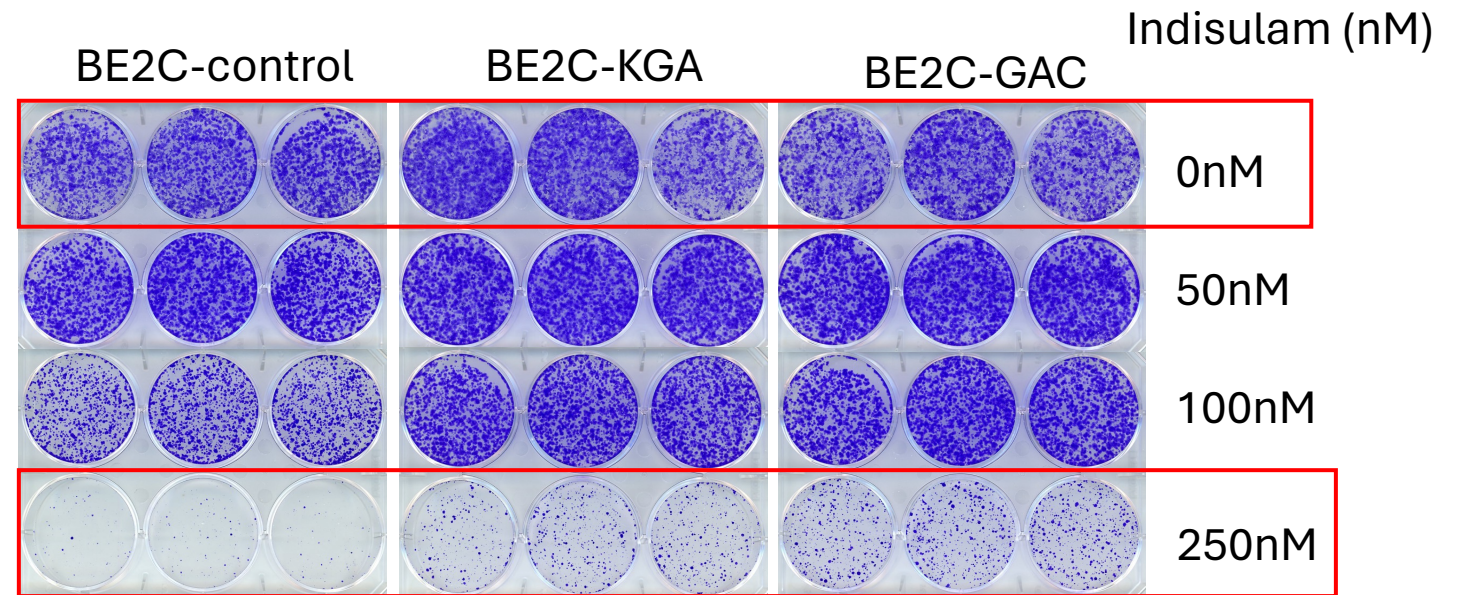

SK-N-AS

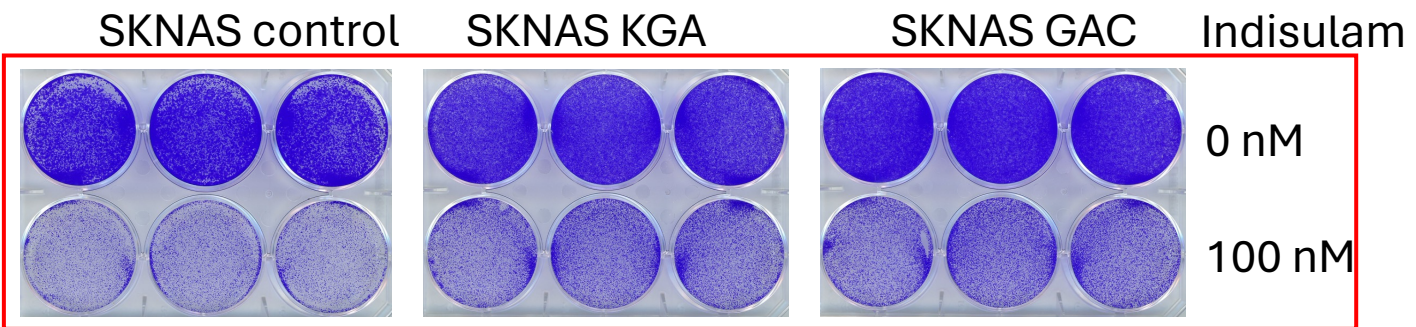

Supplement: data1 [file elife-90993-data1-v1.zip]
